# Supplementary material for: Insights into the mechanism(s) of digestion of crystalline cellulose by plant class C GH9 endoglucanases
Source: PubMed Central journal article supplement (PMC7385011; doi:10.1007/s00894-019-4133-1), 2019-07-23
Supplement: 894_2019_4133_MOESM1_ESM.pdf [file 894_2019_4133_MOESM1_ESM.pdf]

Supplementary Table 1: Principal components of characterized and putative class C GH9 endoglucanases (n=96)

|    | Sequence ID            | Organism                          | Principal components |         |         |      |
|----|------------------------|-----------------------------------|----------------------|---------|---------|------|
|    |                        |                                   | PC1                  | PC3     | PC2     |      |
| 1  | Q5NAT0                 | <i>Oryza sativa</i>               | -26.175              | -13.655 | -49.195 |      |
| 2  | Q8LJP6                 | <i>Gossypium hirsutum</i>         | -7.1372              | -12.302 | -43.569 |      |
| 3  | Q9ZSP9                 | <i>Solanum lycopersicum</i>       | -19.659              | -26.247 | -40.287 |      |
| 4  | orange1.1g043219m      | <i>Citrus sinensis</i>            | -24.106              | -15.803 | 0.06297 |      |
| 5  | ppa022524m             | <i>Prunus persica</i>             | -24.135              | -17.287 | 1.31338 |      |
| 6  | SapurV1A.0237s0330.1.p | <i>Salix purpurea</i>             | -40.74               | -2.866  | 8.82545 |      |
| 7  | Carubv10003874m        | <i>Capsella rubella</i>           | -40.74               | -2.866  | 8.82545 |      |
| 8  | Pavir.Ea00142.1.p      | <i>Panicum virgatum</i>           | -24.485              | -5.5735 | -3.9026 |      |
| 9  | Bradi2g07150.1.p       | <i>Bradipodium distachyon</i>     | -3.0182              | -6.0425 | 10.4498 |      |
| 10 | Brara.E01714.1.p       | <i>Brassica rapa</i>              | -31.214              | -1.7171 | 3.1937  |      |
| 11 | Pavir.Eb00189.1.p      | <i>Panicum virgatum</i>           | -25.013              | -5.4123 | 2.20198 |      |
| 12 | GRMZM2G453565_P01      | <i>Zea mays</i>                   | -31.698              | -2.084  | 7.12213 |      |
| 13 | SapurV1A.0035s0560.1.p | <i>Salix purpurea</i>             | -25.013              | -5.4123 | 2.20198 |      |
| 14 | Bradi5g26010.1.p       | <i>Bradipodium distachyon</i>     | -23.608              | -17.579 | -4.774  |      |
| 15 | PGSC0003DMP400021750   | <i>Solanum tuberosum</i>          | -31.698              | -2.084  | 7.12213 |      |
| 16 | Migut.D01909.1.p       | <i>Mimulus guttatus</i>           | -24.136              | -17.417 | 1.3305  |      |
| 17 | 234652                 | <i>Selaginella moellendorffii</i> | -31.698              | -2.084  | 7.12213 |      |
| 18 | MDP0000131267          | <i>Malus domestica</i>            | -41.208              | -3.8202 | 12.1763 |      |
| 19 | Potri.001G092200.1     | <i>Populus trichocarpa</i>        | -38.546              | -3.047  | 8.28083 |      |
| 20 | GRMZM2G143747_P01      | <i>Zea mays</i>                   | -31.698              | -2.084  | 7.12213 |      |
| 21 | Solyc02g014220.2.1     | <i>Solanum lycopersicum</i>       | -31.15               | -1.2201 | 0.31682 | n=42 |
| 22 | Aquca_037_00141.1      | <i>Aquilegia coerulea</i>         | -4.0553              | -16.919 | -8.072  |      |
| 23 | Glyma.05G216400.1.p    | <i>Glycine max</i>                | -25.013              | -5.4123 | 2.20198 |      |
| 24 | 489943                 | <i>Arabidopsis lyrata</i>         | -20.422              | -4.4213 | 14.1454 |      |
| 25 | Bostr.25463s0223.1.p   | <i>Boechea stricta</i>            | -20.714              | -3.2022 | 15.0352 |      |
| 26 | Eucgr.J00862.1         | <i>Eucalyptus grandis</i>         | -24.715              | -18.956 | -1.4259 |      |
| 27 | ppa002939m             | <i>Prunus persica</i>             | -32.386              | -0.5027 | 10.9578 |      |
| 28 | PGSC0003DMP400034548   | <i>Solanum tuberosum</i>          | -31.678              | -1.0589 | 6.42137 |      |
| 29 | Thhalv10028514m        | <i>Eutrema salsugineum</i>        | -20.704              | -2.9152 | 14.82   |      |
| 30 | Medtr4g074960.1        | <i>Medicago truncatula</i>        | -28.611              | -1.7237 | 5.96221 |      |
| 31 | Gorai.005G210200.1     | <i>Gossypium raimondii</i>        | -31.17               | -2.2451 | 1.01758 |      |
| 32 | Potri.003G139600.1     | <i>Populus trichocarpa</i>        | -40.74               | -2.866  | 8.82545 |      |
| 33 | Sobic.003G015700.1.p   | <i>Sorghum bicolor</i>            | -33.132              | -1.7338 | 7.59862 |      |
| 34 | Brara.l01325.1.p       | <i>Brassica rapa</i>              | -25.013              | -5.4123 | 2.20198 |      |
| 35 | Cucsa.107370.1         | <i>Cucumis sativus</i>            | -32.09               | -3.6424 | 9.27177 |      |
| 36 | 99802                  | <i>Selaginella moellendorffii</i> | -40.795              | -2.1137 | 8.90289 |      |
| 37 | Brara.C02656.1.p       | <i>Brassica rapa</i>              | -20.704              | -2.9152 | 14.82   |      |
| 38 | Lus10032377            | <i>Linum usitatissimum</i>        | -4.0553              | -16.919 | -8.072  |      |
| 39 | Lus10003888            | <i>Linum usitatissimum</i>        | -4.0553              | -16.919 | -8.072  |      |
| 40 | Medtr8g099410.1        | <i>Medicago truncatula</i>        | -41.145              | -2.7908 | 11.9865 |      |
| 41 | AT4G11050.1            | <i>Arabidopsis thaliana</i>       | -20.704              | -2.9152 | 14.82   |      |
| 42 | Bradi2g32270.1.p       | <i>Bradipodium distachyon</i>     | -32.103              | -2.0088 | 10.2831 |      |
| 1  | Q93WY9                 | <i>Nicotiana tabacum</i>          | -9.1093              | 1.52235 | -41.947 |      |
| 2  | 474038                 | <i>Arabidopsis lyrata</i>         | -32.505              | 13.459  | -3.4165 |      |
| 3  | Pavir.Ca00497.1.p      | <i>Panicum virgatum</i>           | -32.005              | 13.4669 | -9.7136 |      |
| 4  | MDP0000276676          | <i>Malus domestica</i>            | -32.505              | 13.459  | -3.4165 |      |
| 5  | Cucsa.303850.1         | <i>Cucumis sativus</i>            | -28.903              | 10.8242 | -6.4089 |      |
| 6  | cassava4.1_003698m     | <i>Manihot esculenta</i>          | -33.307              | 16.6434 | 0.17342 |      |
| 7  | Sobic.009G079900.1.p   | <i>Sorghum bicolor</i>            | -32.022              | 13.7921 | -7.3446 |      |
| 8  | GSVIVT01019523001      | <i>Vitis vinifera</i>             | -32.505              | 13.459  | -3.4165 |      |
| 9  | Carubv10012624m        | <i>Capsella rubella</i>           | -32.505              | 13.459  | -3.4165 |      |
| 10 | evm.TU.contig_27379.2  | <i>Carica papaya</i>              | -33.307              | 16.6434 | 0.17342 | n=19 |
| 11 | Bostr.26675s0278.1.p   | <i>Boechea stricta</i>            | -31.979              | 13.234  | -9.5598 |      |
| 12 | Gorai.008G254000.1     | <i>Gossypium raimondii</i>        | -21.125              | 16.6217 | 4.85636 |      |

|    |                         |                                   |         |         |         |      |
|----|-------------------------|-----------------------------------|---------|---------|---------|------|
| 13 | orange1.1g006835m       | <i>Citrus sinensis</i>            | -32.902 | 16.5897 | -3.1781 |      |
| 14 | Lus10001833             | <i>Linum usitatissimum</i>        | -32.902 | 16.5897 | -3.1781 |      |
| 15 | Thhalv10011318m         | <i>Eutrema salsugineum</i>        | -31.979 | 13.234  | -9.5598 |      |
| 16 | Gorai.003G080800.1      | <i>Gossypium raimondii</i>        | -32.911 | 13.5127 | -0.065  |      |
| 17 | Ciclev10019301m         | <i>Citrus clementina</i>          | -31.979 | 13.234  | -9.5598 |      |
| 18 | Lus10017402             | <i>Linum usitatissimum</i>        | -32.505 | 13.459  | -3.4165 |      |
| 19 | AT1G48930.1             | <i>Arabidopsis thaliana</i>       | -32.505 | 13.459  | -3.4165 |      |
| 1  | Eucgr.E00858.1          | <i>Eucalyptus grandis</i>         | 51.815  | -4.8982 | 6.72738 |      |
| 2  | Phvul.002G297600.1      | <i>Phaseolus vulgaris</i>         | 52.2996 | -4.5314 | 2.79895 |      |
| 3  | Phpat.013G084100.1.p    | <i>Physcomitrella patens</i>      | 52.3427 | -5.0594 | 0.62283 |      |
| 4  | Phpat.006G094200.1.p    | <i>Physcomitrella patens</i>      | 52.5324 | -4.1475 | 4.2756  |      |
| 5  | Bostr.29223s0050.1.p    | <i>Boechea stricta</i>            | 51.4097 | -4.8231 | 9.88839 |      |
| 6  | LOC_Os05g12150.1        | <i>Oryza sativa</i>               | 51.815  | -4.8982 | 6.72738 |      |
| 7  | Si000642m               | <i>Setaria italica</i>            | 19.2078 | -4.3037 | 5.30126 |      |
| 8  | LOC_Os01g12030.1        | <i>Oryza sativa</i>               | 38.8555 | -4.7061 | 2.1592  |      |
| 9  | GRMZM2G343144_P02       | <i>Zea mays</i>                   | 51.815  | -4.8982 | 6.72738 |      |
| 10 | Eucgr.D01733.1          | <i>Eucalyptus grandis</i>         | 51.815  | -4.8982 | 6.72738 |      |
| 11 | mrna32087.1-v1.0-hybrid | <i>Fragaria vesca</i>             | 51.815  | -4.8982 | 6.72738 | n=22 |
| 12 | AT1G64390.1             | <i>Arabidopsis thaliana</i>       | 51.815  | -4.8982 | 6.72738 |      |
| 13 | Gorai.004G133700.1      | <i>Gossypium raimondii</i>        | 51.815  | -4.8982 | 6.72738 |      |
| 14 | Thhalv10023353m         | <i>Eutrema salsugineum</i>        | 51.815  | -4.8982 | 6.72738 |      |
| 15 | Phpat.026G000800.1.p    | <i>Physcomitrella patens</i>      | 52.4941 | -7.4573 | -3.8268 |      |
| 16 | Phvul.011G030300.1      | <i>Phaseolus vulgaris</i>         | 8.50492 | -8.0315 | -7.4505 |      |
| 17 | mrna11058.1-v1.0-hybrid | <i>Fragaria vesca</i>             | 52.3632 | -4.0344 | -0.0779 |      |
| 18 | LOC_Os04g57860.1        | <i>Oryza sativa</i>               | 13.9433 | -4.8868 | 6.69178 |      |
| 19 | 109529                  | <i>Selaginella moellendorffii</i> | 49.547  | -5.3287 | -1.7579 |      |
| 20 | Potri.007G071200.1      | <i>Populus trichocarpa</i>        | 51.815  | -4.8982 | 6.72738 |      |
| 21 | Aquca_013_00114.1       | <i>Aquilegia coerulea</i>         | 51.9229 | -3.7792 | 4.87625 |      |
| 22 | Pavir.Cb01721.1.p       | <i>Panicum virgatum</i>           | 51.4097 | -4.8231 | 9.88839 |      |
| 1  | 29675.m000388           | <i>Ricinus communis</i>           | 52.3642 | 10.0282 | -7.8938 |      |
| 2  | Carubv10019981m         | <i>Capsella rubella</i>           | 52.3213 | 10.5863 | -5.6785 |      |
| 3  | Lus10010201             | <i>Linum usitatissimum</i>        | 51.8379 | 10.2532 | -1.7504 |      |
| 4  | Si021476m               | <i>Setaria italica</i>            | 51.8379 | 10.2532 | -1.7504 |      |
| 5  | Cagra.1255s0001.1.p     | <i>Capsella grandiflora</i>       | 52.3213 | 10.5863 | -5.6785 |      |
| 6  | Sobic.006G265100.1.p    | <i>Sorghum bicolor</i>            | 51.4415 | 13.3839 | -1.512  |      |
| 7  | Aquca_002_01464.1       | <i>Aquilegia coerulea</i>         | 51.8379 | 10.2532 | -1.7504 | n=13 |
| 8  | MDP0000826600           | <i>Malus domestica</i>            | 52.3213 | 10.5863 | -5.6785 |      |
| 9  | Si021474m               | <i>Setaria italica</i>            | 52.0024 | 10.7011 | -2.7862 |      |
| 10 | GSVIVT01012043001       | <i>Vitis vinifera</i>             | 52.3213 | 10.5863 | -5.6785 |      |
| 11 | Ciclev10033912m         | <i>Citrus clementina</i>          | 52.3642 | 10.0282 | -7.8938 |      |
| 12 | Cucsa.128330.1          | <i>Cucumis sativus</i>            | 52.3642 | 10.0282 | -7.8938 |      |
| 13 | Pavir.Ga00244.1.p       | <i>Panicum virgatum</i>           | 51.8379 | 10.2532 | -1.7504 |      |
