# Supplementary material for: Insights into the mechanism(s) of digestion of crystalline cellulose by plant class C GH9 endoglucanases
Source: PubMed Central journal article supplement (PMC7385011; doi:10.1007/s00894-019-4133-1), 2019-07-23
Supplement: 894_2019_4133_MOESM2_ESM.pdf [file 894_2019_4133_MOESM2_ESM.pdf]

# Phyre2

Email: siddhartha\_kundu@yahoo.co.in  
 Description: Q8LJP6\_\_  
 Date: Thu Feb 1 11:12:10 GMT 2018  
 Unique Job ID: b166f14fde6eb22a

Detailed template information

| #  | Template                | Alignment Coverage                                                                            | 3D Model                                                                            | Confidence | % i.d. | Template Information                                                                                                                                                                                                                                        |
|----|-------------------------|-----------------------------------------------------------------------------------------------|-------------------------------------------------------------------------------------|------------|--------|-------------------------------------------------------------------------------------------------------------------------------------------------------------------------------------------------------------------------------------------------------------|
| 1  | <a href="#">c1js4B_</a> | 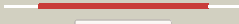 Alignment   |    | 100.0      | 37     | <b>PDB header:</b> glycosyl hydrolase<br><b>Chain:</b> B; <b>PDB Molecule:</b> endo/exocellulase e4;<br><b>PDBTitle:</b> endo/exocellulase:cellobiose from thermomonospora                                                                                  |
| 2  | <a href="#">c1ga2A_</a> |  Alignment   |    | 100.0      | 34     | <b>PDB header:</b> hydrolase<br><b>Chain:</b> A; <b>PDB Molecule:</b> endoglucanase 9g;<br><b>PDBTitle:</b> the crystal structure of endoglucanase 9g from clostridium2 cellulolyticum complexed with cellobiose                                            |
| 3  | <a href="#">c5gxyA_</a> |  Alignment   |    | 100.0      | 32     | <b>PDB header:</b> hydrolase<br><b>Chain:</b> A; <b>PDB Molecule:</b> glucanase;<br><b>PDBTitle:</b> crystal structure of endoglucanase celq from clostridium thermocellum2 complexed with cellobiose and tris                                              |
| 4  | <a href="#">d1g87a1</a> |  Alignment   |    | 100.0      | 37     | <b>Fold:</b> alpha/alpha toroid<br><b>Superfamily:</b> Six-hairpin glycosidases<br><b>Family:</b> Cellulases catalytic domain                                                                                                                               |
| 5  | <a href="#">d1tf4a1</a> |  Alignment |  | 100.0      | 42     | <b>Fold:</b> alpha/alpha toroid<br><b>Superfamily:</b> Six-hairpin glycosidases<br><b>Family:</b> Cellulases catalytic domain                                                                                                                               |
| 6  | <a href="#">c2yikA_</a> |  Alignment |  | 100.0      | 31     | <b>PDB header:</b> hydrolase<br><b>Chain:</b> A; <b>PDB Molecule:</b> endoglucanase;<br><b>PDBTitle:</b> catalytic domain of clostridium thermocellum celt                                                                                                  |
| 7  | <a href="#">c2xfgA_</a> |  Alignment |  | 100.0      | 40     | <b>PDB header:</b> hydrolase/sugar binding protein<br><b>Chain:</b> A; <b>PDB Molecule:</b> endoglucanase 1;<br><b>PDBTitle:</b> reassembly and co-crystallization of a family 9 processive2 endoglucanase from separately expressed gh9 and cbm3c3 modules |
| 8  | <a href="#">c3wc3A_</a> |  Alignment |  | 100.0      | 43     | <b>PDB header:</b> hydrolase<br><b>Chain:</b> A; <b>PDB Molecule:</b> endo-1, 4-beta-glucanase;<br><b>PDBTitle:</b> crystal structure of endo-1,4-beta-glucanase from eisenia fetida                                                                        |
| 9  | <a href="#">d1ia6a_</a> |  Alignment |  | 100.0      | 36     | <b>Fold:</b> alpha/alpha toroid<br><b>Superfamily:</b> Six-hairpin glycosidases<br><b>Family:</b> Cellulases catalytic domain                                                                                                                               |
| 10 | <a href="#">d1ks8a_</a> |  Alignment |  | 100.0      | 48     | <b>Fold:</b> alpha/alpha toroid<br><b>Superfamily:</b> Six-hairpin glycosidases<br><b>Family:</b> Cellulases catalytic domain                                                                                                                               |
| 11 | <a href="#">d1ut9a1</a> |  Alignment |  | 100.0      | 19     | <b>Fold:</b> alpha/alpha toroid<br><b>Superfamily:</b> Six-hairpin glycosidases<br><b>Family:</b> Cellulases catalytic domain                                                                                                                               |

|    |                         |           |                                                                                     |       |    |                                                                                                                                                                                                                                                                |
|----|-------------------------|-----------|-------------------------------------------------------------------------------------|-------|----|----------------------------------------------------------------------------------------------------------------------------------------------------------------------------------------------------------------------------------------------------------------|
| 12 | <a href="#">c1clcA_</a> | Alignment |     | 100.0 | 19 | <b>PDB header:</b> glycosyl hydrolase<br><b>Chain:</b> A; <b>PDB Molecule:</b> endoglucanase celd; ec: 3.2.1.4;<br><b>PDBTitle:</b> three-dimensional structure of endoglucanase d at 1.92 angstroms resolution                                                |
| 13 | <a href="#">d1clca1</a> | Alignment |    | 100.0 | 20 | <b>Fold:</b> alpha/alpha toroid<br><b>Superfamily:</b> Six-hairpin glycosidases<br><b>Family:</b> Cellulases catalytic domain                                                                                                                                  |
| 14 | <a href="#">c1ut9A_</a> | Alignment |    | 100.0 | 20 | <b>PDB header:</b> hydrolase<br><b>Chain:</b> A; <b>PDB Molecule:</b> cellulose 1,4-beta-cellobiosidase;<br><b>PDBTitle:</b> structural basis for the exocellulase activity of the2 cellobiohydrolase cbha from c. thermocellum                                |
| 15 | <a href="#">c3gzkA_</a> | Alignment |    | 100.0 | 20 | <b>PDB header:</b> hydrolase<br><b>Chain:</b> A; <b>PDB Molecule:</b> cellulase;<br><b>PDBTitle:</b> structure of a. acidocaldarius cellulase celsa                                                                                                            |
| 16 | <a href="#">c3x17B_</a> | Alignment |    | 100.0 | 21 | <b>PDB header:</b> hydrolase<br><b>Chain:</b> B; <b>PDB Molecule:</b> endoglucanase;<br><b>PDBTitle:</b> crystal structure of metagenome-derived glycoside hydrolase family 92 endoglucanase                                                                   |
| 17 | <a href="#">c5dgrB_</a> | Alignment |   | 100.0 | 15 | <b>PDB header:</b> hydrolase<br><b>Chain:</b> B; <b>PDB Molecule:</b> putative endoglucanase-related protein;<br><b>PDBTitle:</b> crystal structure of gh9 exo-beta-d-glucosaminidase pbpra0520,2 glucosamine complex                                          |
| 18 | <a href="#">c3h7IC_</a> | Alignment |  | 100.0 | 17 | <b>PDB header:</b> hydrolase<br><b>Chain:</b> C; <b>PDB Molecule:</b> endoglucanase;<br><b>PDBTitle:</b> crystal structure of endoglucanase-related protein from vibrio2 parahaemolyticus                                                                      |
| 19 | <a href="#">c2xfgB_</a> | Alignment |  | 99.6  | 13 | <b>PDB header:</b> hydrolase/sugar binding protein<br><b>Chain:</b> B; <b>PDB Molecule:</b> endoglucanase 1;<br><b>PDBTitle:</b> reassembly and co-crystallization of a family 9 processive2 endoglucanase from separately expressed gh9 and cbm3c3 modules    |
| 20 | <a href="#">d1tf4a2</a> | Alignment |  | 99.2  | 14 | <b>Fold:</b> Common fold of diphtheria toxin/transcription factors/cytochrome f<br><b>Superfamily:</b> Carbohydrate-binding domain<br><b>Family:</b> Cellulose-binding domain family III                                                                       |
| 21 | <a href="#">d1g87a2</a> | Alignment | not modelled                                                                        | 99.1  | 17 | <b>Fold:</b> Common fold of diphtheria toxin/transcription factors/cytochrome f<br><b>Superfamily:</b> Carbohydrate-binding domain<br><b>Family:</b> Cellulose-binding domain family III                                                                       |
| 22 | <a href="#">c4v1sA_</a> | Alignment | not modelled                                                                        | 98.9  | 10 | <b>PDB header:</b> hydrolase<br><b>Chain:</b> A; <b>PDB Molecule:</b> alpha-1,6-mannanase;<br><b>PDBTitle:</b> structure of the gh76 alpha-mannanase bt2949 from2 bacteroides thetaiotaomicron                                                                 |
| 23 | <a href="#">c4z4IA_</a> | Alignment | not modelled                                                                        | 98.4  | 11 | <b>PDB header:</b> isomerase<br><b>Chain:</b> A; <b>PDB Molecule:</b> cellobiose 2-epimerase;<br><b>PDBTitle:</b> crystal structure of cellobiose 2-epimerase from caldicellulosiruptor2 saccharolyticus dsm 8903                                              |
| 24 | <a href="#">c4c1sA_</a> | Alignment | not modelled                                                                        | 98.4  | 15 | <b>PDB header:</b> hydrolase<br><b>Chain:</b> A; <b>PDB Molecule:</b> glycoside hydrolase family 76 mannosidase;<br><b>PDBTitle:</b> glycoside hydrolase family 76 (mannosidase) bt3792 from2 bacteroides thetaiotaomicron vpi-5482                            |
| 25 | <a href="#">c3wkgA_</a> | Alignment | not modelled                                                                        | 98.4  | 12 | <b>PDB header:</b> isomerase<br><b>Chain:</b> A; <b>PDB Molecule:</b> cellobiose 2-epimerase;<br><b>PDBTitle:</b> crystal structure of cellobiose 2-epimerase in complex with2 glucosylmannose                                                                 |
| 26 | <a href="#">c3vw5B_</a> | Alignment | not modelled                                                                        | 98.3  | 17 | <b>PDB header:</b> isomerase<br><b>Chain:</b> B; <b>PDB Molecule:</b> cellobiose 2-epimerase;<br><b>PDBTitle:</b> crystal structure of sugar epimerase from ruminal bacterium                                                                                  |
| 27 | <a href="#">c3k7xA_</a> | Alignment | not modelled                                                                        | 98.2  | 14 | <b>PDB header:</b> structural genomics, unknown function<br><b>Chain:</b> A; <b>PDB Molecule:</b> lin0763 protein;<br><b>PDBTitle:</b> crystal structure of the lin0763 protein from listeria innocua.2 northeast structural genomics consortium target lkr23. |
| 28 | <a href="#">c4qk0C_</a> | Alignment | not modelled                                                                        | 98.0  | 13 | <b>PDB header:</b> hydrolase<br><b>Chain:</b> C; <b>PDB Molecule:</b> gh127 beta-l-arabinofuranoside;<br><b>PDBTitle:</b> crystal structure of ara127n-se, a gh127 beta-l-                                                                                     |

|    |                          |           |              |      |    |                                                                                                                                                                                                                                                                                                                                                                                                                                                    |
|----|--------------------------|-----------|--------------|------|----|----------------------------------------------------------------------------------------------------------------------------------------------------------------------------------------------------------------------------------------------------------------------------------------------------------------------------------------------------------------------------------------------------------------------------------------------------|
|    |                          |           |              |      |    | arabinofuranosidase2 from geobacillus stearothermophilus t6<br><b>PDB header:</b> hydrolase<br><b>Chain:</b> A: <b>PDB Molecule:</b> glycoside hydrolase, family 9;<br><b>PDBTitle:</b> 3b' carbohydrate-binding module from the cel9v glycoside2 hydrolase from clostridium thermocellum, in-house data                                                                                                                                           |
| 29 | <a href="#">c2wo4A_</a>  | Alignment | not modelled | 97.8 | 12 | <b>PDB header:</b> hydrolase<br><b>Chain:</b> A: <b>PDB Molecule:</b> non-reducing end beta-l-arabinofuranosidase;<br><b>PDBTitle:</b> glycoside hydrolase bt_1003                                                                                                                                                                                                                                                                                 |
| 30 | <a href="#">c5mqoA_</a>  | Alignment | not modelled | 97.8 | 13 | <b>Fold:</b> Common fold of diphtheria toxin/transcription factors/cytochrome f<br><b>Superfamily:</b> Carbohydrate-binding domain<br><b>Family:</b> Cellulose-binding domain family III<br><b>PDB header:</b> hydrolase<br><b>Chain:</b> C: <b>PDB Molecule:</b> alpha-1,6-mannanase;<br><b>PDBTitle:</b> crystal structure of bacillus circulans tn-31 aman6 in2 complex with mannobiose                                                         |
| 31 | <a href="#">d1nbca_</a>  | Alignment | not modelled | 97.7 | 20 | <b>PDB header:</b> hydrolase<br><b>Chain:</b> B: <b>PDB Molecule:</b> glycoside hydrolase family 73;<br><b>PDBTitle:</b> crystal structure of a putative glycosylhydrolase (bt_3782) from2 bacteroides thetaiotaomicron vpi-5482 at 1.89 a resolution                                                                                                                                                                                              |
| 32 | <a href="#">c4bojC_</a>  | Alignment | not modelled | 97.6 | 17 | <b>PDB header:</b> carbohydrate-binding protein<br><b>Chain:</b> A: <b>PDB Molecule:</b> type 3a cellulose-binding domain protein;<br><b>PDBTitle:</b> biomass sensing module from putative rsgi2 protein of2 clostridium thermocellum resemble family 3 carbohydrate-3 binding module of cellulosome                                                                                                                                              |
| 33 | <a href="#">c4mu9B_</a>  | Alignment | not modelled | 97.6 | 11 | <b>PDB header:</b> isomerase<br><b>Chain:</b> A: <b>PDB Molecule:</b> n-acetylglucosamine 2-epimerase;<br><b>PDBTitle:</b> crystal structure of an n-acetylglucosamine 2-epimerase family protein2 from xylella fastidiosa                                                                                                                                                                                                                         |
| 34 | <a href="#">c4b9pA_</a>  | Alignment | not modelled | 97.5 | 14 | <b>Fold:</b> Common fold of diphtheria toxin/transcription factors/cytochrome f<br><b>Superfamily:</b> Carbohydrate-binding domain<br><b>Family:</b> Cellulose-binding domain family II<br><b>PDB header:</b> hydrolase<br><b>Chain:</b> A: <b>PDB Molecule:</b> non-reducing end beta-l-arabinofuranosidase;<br><b>PDBTitle:</b> crystal structure of gh127 beta-l-arabinofuranosidase hypba1 from2 bifidobacterium longum arabinose complex form |
| 35 | <a href="#">c3gt5A_</a>  | Alignment | not modelled | 97.5 | 15 | <b>PDB header:</b> sugar binding protein<br><b>Chain:</b> A: <b>PDB Molecule:</b> cellulosomal scaffoldin;<br><b>PDBTitle:</b> structure of a scaffoldin carbohydrate-binding module family 3b from2 the cellulosome of bacteroides cellulosolvens: structural diversity3 and implications for carbohydrate binding                                                                                                                                |
| 36 | <a href="#">d1lexha_</a> | Alignment | not modelled | 97.5 | 14 | <b>PDB header:</b> sugar binding protein<br><b>Chain:</b> A: <b>PDB Molecule:</b> cellulose binding domain-containing protein;<br><b>PDBTitle:</b> biomass sensing modules from putative rsgi-like proteins2 of clostridium thermocellum resemble family 3 carbohydrate-3 binding module of cellulosome                                                                                                                                            |
| 37 | <a href="#">d1g43a_</a>  | Alignment | not modelled | 97.4 | 16 | <b>PDB header:</b> hydrolase<br><b>Chain:</b> A: <b>PDB Molecule:</b> chic;<br><b>PDBTitle:</b> solution structure of the chitin-binding domain of chi18ac from2 streptomyces coelicolor                                                                                                                                                                                                                                                           |
| 38 | <a href="#">c3wkxA_</a>  | Alignment | not modelled | 97.4 | 16 | <b>PDB header:</b> hydrolase<br><b>Chain:</b> A: <b>PDB Molecule:</b> endoglucanase;<br><b>PDBTitle:</b> structure of a novel cbm3 lacking the calcium-binding site                                                                                                                                                                                                                                                                                |
| 39 | <a href="#">c2xbtA_</a>  | Alignment | not modelled | 97.3 | 13 | <b>PDB header:</b> carbohydrate-binding protein<br><b>Chain:</b> A: <b>PDB Molecule:</b> cellulosomal scaffoldin;<br><b>PDBTitle:</b> structure of cbm3b of major scaffoldin subunit scaa from2 acetivibrio cellulolyticus                                                                                                                                                                                                                         |
| 40 | <a href="#">c4b97A_</a>  | Alignment | not modelled | 97.2 | 13 | <b>PDB header:</b> sugar binding protein<br><b>Chain:</b> A: <b>PDB Molecule:</b> cellulose binding domain-containing protein;<br><b>PDBTitle:</b> family 3b carbohydrate-binding module from the biomass2 sensing system of clostridium clariflavum                                                                                                                                                                                               |
| 41 | <a href="#">c2rttA_</a>  | Alignment | not modelled | 97.2 | 14 | <b>PDB header:</b> hydrolase<br><b>Chain:</b> D: <b>PDB Molecule:</b> cellulose 1,4-beta-cellobiosidase;<br><b>PDBTitle:</b> carbohydrate-binding module cbm3b from the cellulosomal2 cellobiohydrolase 9a from clostridium thermocellum                                                                                                                                                                                                           |
| 42 | <a href="#">c2l8aA_</a>  | Alignment | not modelled | 97.2 | 14 | <b>PDB header:</b> isomerase<br><b>Chain:</b> B: <b>PDB Molecule:</b> n-acetyl-d-glucosamine 2-epimerase;<br><b>PDBTitle:</b> crystal structure of anabaena sp. ch1 n-acetyl-d-glucosamine 2-2 epimerase at 2.0 a                                                                                                                                                                                                                                  |
| 43 | <a href="#">c3zqwA_</a>  | Alignment | not modelled | 97.1 | 13 | <b>PDB header:</b> hydrolase<br><b>Chain:</b> G: <b>PDB Molecule:</b> endoglucanase d;<br><b>PDBTitle:</b> the structure of the catalytic and carbohydrate binding domain of2 endoglucanase d from clostridium cellulovorans                                                                                                                                                                                                                       |
| 44 | <a href="#">c4b96A_</a>  | Alignment | not modelled | 96.7 | 13 | <b>PDB header:</b> carbohydrate-binding protein<br><b>Chain:</b> A: <b>PDB Molecule:</b> type 3a cellulose-binding domain protein;<br><b>PDBTitle:</b> biomass sensing modules from putative rsgi-like proteins2 of clostridium thermocellum resemble family 3 carbohydrate-3 binding module of cellulosome                                                                                                                                        |
| 45 | <a href="#">c2ylkD_</a>  | Alignment | not modelled | 96.6 | 9  | <b>PDB header:</b> hydrolase<br><b>Chain:</b> B: <b>PDB Molecule:</b> glycoside hydrolase family 105 protein;<br><b>PDBTitle:</b> crystal structure of a glycoside hydrolase family 105 (gh105) enzyme2 from thielavia terrestris                                                                                                                                                                                                                  |
| 46 | <a href="#">c2gz6B_</a>  | Alignment | not modelled | 96.6 | 9  | <b>PDB header:</b> hydrolase<br><b>Chain:</b> B: <b>PDB Molecule:</b> similar to yter (bacilus subtilis);<br><b>PDBTitle:</b> structural analysis of c. acetobutylicum atcc 824 glycoside hydrolase2 from family 105                                                                                                                                                                                                                               |
| 47 | <a href="#">c3ndyG_</a>  | Alignment | not modelled | 96.6 | 8  | <b>PDB header:</b> hydrolase<br><b>Chain:</b> A: <b>PDB Molecule:</b> glycosyl hydrolase family 88;<br><b>PDBTitle:</b> crystal structure of unsaturated glucuronyl hydrolase specific for2 heparin                                                                                                                                                                                                                                                |
| 48 | <a href="#">c4b9cA_</a>  | Alignment | not modelled | 96.6 | 9  | <b>Fold:</b> alpha/alpha toroid<br><b>Superfamily:</b> Six-hairpin glycosidases<br><b>Family:</b> N-acylglucosamine (NAG) epimerase                                                                                                                                                                                                                                                                                                                |
| 49 | <a href="#">c4xuvB_</a>  | Alignment | not modelled | 96.5 | 12 |                                                                                                                                                                                                                                                                                                                                                                                                                                                    |
| 50 | <a href="#">c4wu0B_</a>  | Alignment | not modelled | 96.3 | 12 |                                                                                                                                                                                                                                                                                                                                                                                                                                                    |
| 51 | <a href="#">c3wiwA_</a>  | Alignment | not modelled | 96.2 | 9  |                                                                                                                                                                                                                                                                                                                                                                                                                                                    |
| 52 | <a href="#">d2afaa1</a>  | Alignment | not modelled | 96.2 | 10 |                                                                                                                                                                                                                                                                                                                                                                                                                                                    |

|    |                         |           |              |      |    |                                                                                                                                                                                                                                                                                |
|----|-------------------------|-----------|--------------|------|----|--------------------------------------------------------------------------------------------------------------------------------------------------------------------------------------------------------------------------------------------------------------------------------|
| 53 | <a href="#">c5no8A</a>  | Alignment | not modelled | 95.6 | 15 | <b>PDB header:</b> lyase<br><b>Chain:</b> A: <b>PDB Molecule:</b> baccell_00875;<br><b>PDBTitle:</b> polysaccharide lyase baccell_00875                                                                                                                                        |
| 54 | <a href="#">c2zzrA</a>  | Alignment | not modelled | 95.0 | 16 | <b>PDB header:</b> hydrolase<br><b>Chain:</b> A: <b>PDB Molecule:</b> unsaturated glucuronyl hydrolase;<br><b>PDBTitle:</b> crystal structure of unsaturated glucuronyl hydrolase from2 streptococcus agalactiae                                                               |
| 55 | <a href="#">c5noaA</a>  | Alignment | not modelled | 94.5 | 8  | <b>PDB header:</b> hydrolase<br><b>Chain:</b> A: <b>PDB Molecule:</b> family 88 glycosyl hydrolase;<br><b>PDBTitle:</b> polysaccharide lyase baccell_00875                                                                                                                     |
| 56 | <a href="#">c2cwrA</a>  | Alignment | not modelled | 94.2 | 7  | <b>PDB header:</b> hydrolase<br><b>Chain:</b> A: <b>PDB Molecule:</b> chitinase;<br><b>PDBTitle:</b> crystal structure of chitin biding domain of chitinase from2 pyrococcus furiosus                                                                                          |
| 57 | <a href="#">c5dhdA</a>  | Alignment | not modelled | 94.2 | 13 | <b>PDB header:</b> hydrolase<br><b>Chain:</b> A: <b>PDB Molecule:</b> chitinase;<br><b>PDBTitle:</b> crystal structure of chbd2 from thermococcus kodakarensis kod1                                                                                                            |
| 58 | <a href="#">d1nc5a</a>  | Alignment | not modelled | 93.8 | 7  | <b>Fold:</b> alpha/alpha toroid<br><b>Superfamily:</b> Six-hairpin glycosidases<br><b>Family:</b> Hypothetical protein YteR                                                                                                                                                    |
| 59 | <a href="#">d1gxma</a>  | Alignment | not modelled | 93.8 | 18 | <b>Fold:</b> alpha/alpha toroid<br><b>Superfamily:</b> Family 10 polysaccharide lyase<br><b>Family:</b> Family 10 polysaccharide lyase                                                                                                                                         |
| 60 | <a href="#">d1fp3a</a>  | Alignment | not modelled | 93.7 | 19 | <b>Fold:</b> alpha/alpha toroid<br><b>Superfamily:</b> Six-hairpin glycosidases<br><b>Family:</b> N-acetylglucosamine (NAG) epimerase                                                                                                                                          |
| 61 | <a href="#">c3e6uA</a>  | Alignment | not modelled | 93.7 | 22 | <b>PDB header:</b> signaling protein<br><b>Chain:</b> A: <b>PDB Molecule:</b> lanc-like protein 1;<br><b>PDBTitle:</b> crystal structure of human lanc1                                                                                                                        |
| 62 | <a href="#">c3k11A</a>  | Alignment | not modelled | 92.2 | 11 | <b>PDB header:</b> hydrolase<br><b>Chain:</b> A: <b>PDB Molecule:</b> putative glycosyl hydrolase;<br><b>PDBTitle:</b> crystal structure of putative glycosyl hydrolase (np_813087.1) from2 bacteroides thetaiotaomicron vpi-5482 at 1.80 a resolution                         |
| 63 | <a href="#">c4q88B</a>  | Alignment | not modelled | 88.2 | 7  | <b>PDB header:</b> structural genomics, unknown function<br><b>Chain:</b> B: <b>PDB Molecule:</b> uncharacterized protein;<br><b>PDBTitle:</b> glycosyl hydrolase family 88 from bacteroides vulgatus                                                                          |
| 64 | <a href="#">c3pmmA</a>  | Alignment | not modelled | 86.1 | 13 | <b>PDB header:</b> hydrolase<br><b>Chain:</b> A: <b>PDB Molecule:</b> putative cytoplasmic protein;<br><b>PDBTitle:</b> the crystal structure of a possible member of gh105 family from2 klebsiella pneumoniae subsp. pneumoniae mgh 78578                                     |
| 65 | <a href="#">d2d5ja1</a> | Alignment | not modelled | 85.9 | 12 | <b>Fold:</b> alpha/alpha toroid<br><b>Superfamily:</b> Six-hairpin glycosidases<br><b>Family:</b> Glycosyl Hydrolase Family 88                                                                                                                                                 |
| 66 | <a href="#">c4ce7B</a>  | Alignment | not modelled | 85.5 | 11 | <b>PDB header:</b> hydrolase<br><b>Chain:</b> B: <b>PDB Molecule:</b> unsaturated 3s-rhamnoglycuronyl hydrolase;<br><b>PDBTitle:</b> crystal structure of a novel unsaturated beta-glucuronyl2 hydrolase enzyme, belonging to family gh105, involved in3 ulvan degradation     |
| 67 | <a href="#">c5a29A</a>  | Alignment | not modelled | 84.4 | 24 | <b>PDB header:</b> lyase<br><b>Chain:</b> A: <b>PDB Molecule:</b> exopolysaccharide lyase;<br><b>PDBTitle:</b> family 2 pectate lyase from vibrio vulnificus                                                                                                                   |
| 68 | <a href="#">d2ri9a1</a> | Alignment | not modelled | 81.0 | 10 | <b>Fold:</b> alpha/alpha toroid<br><b>Superfamily:</b> Seven-hairpin glycosidases<br><b>Family:</b> Class I alpha-1,2-mannosidase, catalytic domain                                                                                                                            |
| 69 | <a href="#">c1krfA</a>  | Alignment | not modelled | 79.9 | 10 | <b>PDB header:</b> hydrolase<br><b>Chain:</b> A: <b>PDB Molecule:</b> mannosyl-oligosaccharide alpha-1,2-mannosidase;<br><b>PDBTitle:</b> structure of p. citrinum alpha 1,2-mannosidase reveals the basis for2 differences in specificity of the er and golgi class i enzymes |
| 70 | <a href="#">c3icgD</a>  | Alignment | not modelled | 77.4 | 11 | <b>PDB header:</b> hydrolase<br><b>Chain:</b> D: <b>PDB Molecule:</b> endoglucanase d;<br><b>PDBTitle:</b> crystal structure of the catalytic and carbohydrate binding domain of2 endoglucanase d from clostridium cellulovorans                                               |
| 71 | <a href="#">d1qaza</a>  | Alignment | not modelled | 74.5 | 12 | <b>Fold:</b> alpha/alpha toroid<br><b>Superfamily:</b> Chondroitin AC/alginate lyase<br><b>Family:</b> Alginate lyase A1-III                                                                                                                                                   |
| 72 | <a href="#">d1hcua</a>  | Alignment | not modelled | 73.5 | 10 | <b>Fold:</b> alpha/alpha toroid<br><b>Superfamily:</b> Seven-hairpin glycosidases<br><b>Family:</b> Class I alpha-1,2-mannosidase, catalytic domain                                                                                                                            |
| 73 | <a href="#">d1nxca</a>  | Alignment | not modelled | 73.0 | 5  | <b>Fold:</b> alpha/alpha toroid<br><b>Superfamily:</b> Seven-hairpin glycosidases<br><b>Family:</b> Class I alpha-1,2-mannosidase, catalytic domain                                                                                                                            |
| 74 | <a href="#">c1x9dA</a>  | Alignment | not modelled | 72.6 | 13 | <b>PDB header:</b> hydrolase<br><b>Chain:</b> A: <b>PDB Molecule:</b> endoplasmic reticulum mannosyl-oligosaccharide 1,2-alpha-<br><b>PDBTitle:</b> crystal structure of human class i alpha-1,2-mannosidase in complex2 with thio-disaccharide substrate analogue             |
| 75 | <a href="#">d1x9da1</a> | Alignment | not modelled | 72.6 | 13 | <b>Fold:</b> alpha/alpha toroid<br><b>Superfamily:</b> Seven-hairpin glycosidases<br><b>Family:</b> Class I alpha-1,2-mannosidase, catalytic domain                                                                                                                            |
| 76 | <a href="#">c4aygA</a>  | Alignment | not modelled | 66.6 | 18 | <b>PDB header:</b> hydrolase<br><b>Chain:</b> A: <b>PDB Molecule:</b> mannosyl-oligosaccharide 1,2-alpha-mannosidase;<br><b>PDBTitle:</b> structure of the gh47 processing alpha-1,2-mannosidase from2 caulobacter strain k31 in complex with mannoimidazole                   |
| 77 | <a href="#">c2v8kA</a>  | Alignment | not modelled | 65.5 | 21 | <b>PDB header:</b> lyase<br><b>Chain:</b> A: <b>PDB Molecule:</b> pectate lyase;<br><b>PDBTitle:</b> structure of a family 2 pectate lyase in complex with2 trigalacturonic acid                                                                                               |

|    |                         |           |              |      |    |                                                                                                                                                                                                                                                                     |
|----|-------------------------|-----------|--------------|------|----|---------------------------------------------------------------------------------------------------------------------------------------------------------------------------------------------------------------------------------------------------------------------|
| 78 | <a href="#">d1r76a_</a> | Alignment | not modelled | 63.5 | 14 | <b>Fold:</b> alpha/alpha toroid<br><b>Superfamily:</b> Family 10 polysaccharide lyase<br><b>Family:</b> Family 10 polysaccharide lyase                                                                                                                              |
| 79 | <a href="#">d1dl2a_</a> | Alignment | not modelled | 57.7 | 15 | <b>Fold:</b> alpha/alpha toroid<br><b>Superfamily:</b> Seven-hairpin glycosidases<br><b>Family:</b> Class I alpha-1,2-mannosidase, catalytic domain                                                                                                                 |
| 80 | <a href="#">c1g6iA_</a> | Alignment | not modelled | 57.5 | 15 | <b>PDB header:</b> hydrolase<br><b>Chain:</b> A: <b>PDB Molecule:</b> class i alpha-1,2-mannosidase;<br><b>PDBTitle:</b> crystal structure of the yeast alpha-1,2-mannosidase with bound 1-2 deoxymannojirimycin at 1.59 a resolution                               |
| 81 | <a href="#">c2kmgA_</a> | Alignment | not modelled | 55.7 | 20 | <b>PDB header:</b> gene regulation<br><b>Chain:</b> A: <b>PDB Molecule:</b> klca;<br><b>PDBTitle:</b> the structure of the klca and ardb proteins show a novel2 fold and antirestriction activity against type i dna3 restriction systems in vivo but not in vitro  |
| 82 | <a href="#">c2fuqA_</a> | Alignment | not modelled | 55.0 | 5  | <b>PDB header:</b> sugar binding protein<br><b>Chain:</b> A: <b>PDB Molecule:</b> heparinase ii protein;<br><b>PDBTitle:</b> crystal structure of heparinase ii                                                                                                     |
| 83 | <a href="#">c3nfvA_</a> | Alignment | not modelled | 53.3 | 11 | <b>PDB header:</b> lyase<br><b>Chain:</b> A: <b>PDB Molecule:</b> alginate lyase;<br><b>PDBTitle:</b> crystal structure of an alginate lyase (bacova_01668) from bacteroides2 ovatus at 1.95 a resolution                                                           |
| 84 | <a href="#">c5bp8A_</a> | Alignment | not modelled | 47.8 | 12 | <b>PDB header:</b> isomerase<br><b>Chain:</b> A: <b>PDB Molecule:</b> ent-copalyl diphosphate synthase;<br><b>PDBTitle:</b> ent-copalyl diphosphate synthase from streptomyces platensis                                                                            |
| 85 | <a href="#">c4ok2A_</a> | Alignment | not modelled | 41.1 | 14 | <b>PDB header:</b> lyase<br><b>Chain:</b> A: <b>PDB Molecule:</b> putative alginate lyase;<br><b>PDBTitle:</b> crystal structure of alg17c mutant y258a                                                                                                             |
| 86 | <a href="#">d1e5ba_</a> | Alignment | not modelled | 34.6 | 13 | <b>Fold:</b> Common fold of diphtheria toxin/transcription factors/cytochrome f<br><b>Superfamily:</b> Carbohydrate-binding domain<br><b>Family:</b> Cellulose-binding domain family II                                                                             |
| 87 | <a href="#">c4fnvA_</a> | Alignment | not modelled | 26.8 | 9  | <b>PDB header:</b> lyase<br><b>Chain:</b> A: <b>PDB Molecule:</b> heparinase iii protein, heparitin sulfate lyase;<br><b>PDBTitle:</b> crystal structure of heparinase iii                                                                                          |
| 88 | <a href="#">c4mcjC_</a> | Alignment | not modelled | 24.2 | 24 | <b>PDB header:</b> transferase<br><b>Chain:</b> C: <b>PDB Molecule:</b> uncharacterized protein;<br><b>PDBTitle:</b> crystal structure of a putative nucleoside deoxyribosyltransferase2 (bdi_0649) from parabacteroides distasonis atcc 8503 at 2.40 a3 resolution |
| 89 | <a href="#">d1f53a_</a> | Alignment | not modelled | 19.3 | 70 | <b>Fold:</b> gamma-Crystallin-like<br><b>Superfamily:</b> gamma-Crystallin-like<br><b>Family:</b> Killer toxin-like protein SKLP                                                                                                                                    |
| 90 | <a href="#">c4qawA_</a> | Alignment | not modelled | 17.8 | 24 | <b>PDB header:</b> hydrolase<br><b>Chain:</b> A: <b>PDB Molecule:</b> xyn30d;<br><b>PDBTitle:</b> structure of modular xyn30d from paenibacillus barcinonensis                                                                                                      |
| 91 | <a href="#">c3adyA_</a> | Alignment | not modelled | 17.5 | 14 | <b>PDB header:</b> proton transport<br><b>Chain:</b> A: <b>PDB Molecule:</b> dotd;<br><b>PDBTitle:</b> crystal structure of dotd from legionella                                                                                                                    |
| 92 | <a href="#">c4zlgA_</a> | Alignment | not modelled | 16.0 | 21 | <b>PDB header:</b> transferase<br><b>Chain:</b> A: <b>PDB Molecule:</b> putative b-glycan phosphorylase;<br><b>PDBTitle:</b> cellobionic acid phosphorylase - gluconic acid complex                                                                                 |
| 93 | <a href="#">c4ozwA_</a> | Alignment | not modelled | 15.8 | 12 | <b>PDB header:</b> lyase<br><b>Chain:</b> A: <b>PDB Molecule:</b> alginate lyase;<br><b>PDBTitle:</b> crystal structure of the periplasmic alginate lyase algI h202a mutant                                                                                         |
| 94 | <a href="#">c5eurC_</a> | Alignment | not modelled | 13.5 | 56 | <b>PDB header:</b> unknown function<br><b>Chain:</b> C: <b>PDB Molecule:</b> uncharacterized protein;<br><b>PDBTitle:</b> hypothetical protein sf216 from shigella flexneri 5a m90t                                                                                 |
| 95 | <a href="#">c3w5mA_</a> | Alignment | not modelled | 13.3 | 16 | <b>PDB header:</b> hydrolase<br><b>Chain:</b> A: <b>PDB Molecule:</b> putative rhamnosidase;<br><b>PDBTitle:</b> crystal structure of streptomyces avermitilis alpha-l-rhamnosidase                                                                                 |
| 96 | <a href="#">c3zr6A_</a> | Alignment | not modelled | 13.0 | 8  | <b>PDB header:</b> hydrolase<br><b>Chain:</b> A: <b>PDB Molecule:</b> galactocerebrosidase;<br><b>PDBTitle:</b> structure of galactocerebrosidase from mouse in complex with2 galactose                                                                             |
| 97 | <a href="#">c3a0oB_</a> | Alignment | not modelled | 12.6 | 8  | <b>PDB header:</b> lyase<br><b>Chain:</b> B: <b>PDB Molecule:</b> oligo alginate lyase;<br><b>PDBTitle:</b> crystal structure of alginate lyase from agrobacterium tumefaciens c58                                                                                  |
| 98 | <a href="#">c1ayeA_</a> | Alignment | not modelled | 12.2 | 16 | <b>PDB header:</b> serine protease<br><b>Chain:</b> A: <b>PDB Molecule:</b> procarboxypeptidase a2;<br><b>PDBTitle:</b> human procarboxypeptidase a2                                                                                                                |
| 99 | <a href="#">d1iyna_</a> | Alignment | not modelled | 10.2 | 16 | <b>Fold:</b> Heme-dependent peroxidases<br><b>Superfamily:</b> Heme-dependent peroxidases<br><b>Family:</b> CCP-like                                                                                                                                                |

# Phyre2

Email [siddhartha\\_kundu@yahoo.co.in](mailto:siddhartha_kundu@yahoo.co.in)  
 Description Q5NAT0\_\_  
 Date Thu Feb 1 11:15:32 GMT 2018  
 Unique Job ID 19edadbfa51e60b5

Detailed template information

| #  | Template                | Alignment Coverage                                                                            | 3D Model                                                                            | Confidence | % i.d. | Template Information                                                                                                                                                                                                                                        |
|----|-------------------------|-----------------------------------------------------------------------------------------------|-------------------------------------------------------------------------------------|------------|--------|-------------------------------------------------------------------------------------------------------------------------------------------------------------------------------------------------------------------------------------------------------------|
| 1  | <a href="#">c1ga2A_</a> | 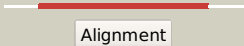 Alignment   |    | 100.0      | 33     | <b>PDB header:</b> hydrolase<br><b>Chain:</b> A: <b>PDB Molecule:</b> endoglucanase 9g;<br><b>PDBTitle:</b> the crystal structure of endoglucanase 9g from clostridium2 cellulolyticum complexed with cellobiose                                            |
| 2  | <a href="#">c1js4B_</a> |  Alignment   |    | 100.0      | 35     | <b>PDB header:</b> glycosyl hydrolase<br><b>Chain:</b> B: <b>PDB Molecule:</b> endo/exocellulase e4;<br><b>PDBTitle:</b> endo/exocellulase:cellobiose from thermomonospora                                                                                  |
| 3  | <a href="#">c5gxyA_</a> |  Alignment   |    | 100.0      | 31     | <b>PDB header:</b> hydrolase<br><b>Chain:</b> A: <b>PDB Molecule:</b> glucanase;<br><b>PDBTitle:</b> crystal structure of endoglucanase celq from clostridium thermocellum2 complexed with cellobiose and tris                                              |
| 4  | <a href="#">d1g87a1</a> |  Alignment   |   | 100.0      | 37     | <b>Fold:</b> alpha/alpha toroid<br><b>Superfamily:</b> Six-hairpin glycosidases<br><b>Family:</b> Cellulases catalytic domain                                                                                                                               |
| 5  | <a href="#">c2yikA_</a> |  Alignment |  | 100.0      | 31     | <b>PDB header:</b> hydrolase<br><b>Chain:</b> A: <b>PDB Molecule:</b> endoglucanase;<br><b>PDBTitle:</b> catalytic domain of clostridium thermocellum cellt                                                                                                 |
| 6  | <a href="#">d1tf4a1</a> |  Alignment |  | 100.0      | 41     | <b>Fold:</b> alpha/alpha toroid<br><b>Superfamily:</b> Six-hairpin glycosidases<br><b>Family:</b> Cellulases catalytic domain                                                                                                                               |
| 7  | <a href="#">c2xfqA_</a> |  Alignment |  | 100.0      | 40     | <b>PDB header:</b> hydrolase/sugar binding protein<br><b>Chain:</b> A: <b>PDB Molecule:</b> endoglucanase 1;<br><b>PDBTitle:</b> reassembly and co-crystallization of a family 9 processive2 endoglucanase from separately expressed gh9 and cbm3c3 modules |
| 8  | <a href="#">c3wc3A_</a> |  Alignment |  | 100.0      | 42     | <b>PDB header:</b> hydrolase<br><b>Chain:</b> A: <b>PDB Molecule:</b> endo-1, 4-beta-glucanase;<br><b>PDBTitle:</b> crystal structure of endo-1,4-beta-glucanase from eisenia fetida                                                                        |
| 9  | <a href="#">d1ia6a_</a> |  Alignment |  | 100.0      | 35     | <b>Fold:</b> alpha/alpha toroid<br><b>Superfamily:</b> Six-hairpin glycosidases<br><b>Family:</b> Cellulases catalytic domain                                                                                                                               |
| 10 | <a href="#">d1ks8a_</a> |  Alignment |  | 100.0      | 45     | <b>Fold:</b> alpha/alpha toroid<br><b>Superfamily:</b> Six-hairpin glycosidases<br><b>Family:</b> Cellulases catalytic domain                                                                                                                               |
| 11 | <a href="#">d1ut9a1</a> |  Alignment |  | 100.0      | 19     | <b>Fold:</b> alpha/alpha toroid<br><b>Superfamily:</b> Six-hairpin glycosidases<br><b>Family:</b> Cellulases catalytic domain                                                                                                                               |

|    |                         |                                                                                               |                                                                                     |       |    |                                                                                                                                                                                                                                                             |
|----|-------------------------|-----------------------------------------------------------------------------------------------|-------------------------------------------------------------------------------------|-------|----|-------------------------------------------------------------------------------------------------------------------------------------------------------------------------------------------------------------------------------------------------------------|
| 12 | <a href="#">d1clca1</a> | 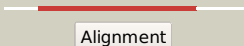 Alignment   |     | 100.0 | 21 | <b>Fold:</b> alpha/alpha toroid<br><b>Superfamily:</b> Six-hairpin glycosidases<br><b>Family:</b> Cellulases catalytic domain                                                                                                                               |
| 13 | <a href="#">c1clcA</a>  |  Alignment   |    | 100.0 | 22 | <b>PDB header:</b> glycosyl hydrolase<br><b>Chain:</b> A: <b>PDB Molecule:</b> endoglucanase celd; ec: 3.2.1.4;<br><b>PDBTitle:</b> three-dimensional structure of endoglucanase d at 1.92 angstroms resolution                                             |
| 14 | <a href="#">c3gzkA</a>  |  Alignment   |    | 100.0 | 21 | <b>PDB header:</b> hydrolase<br><b>Chain:</b> A: <b>PDB Molecule:</b> cellulase;<br><b>PDBTitle:</b> structure of a. acidocaldarius cellulase cela                                                                                                          |
| 15 | <a href="#">c1ut9A</a>  |  Alignment   |    | 100.0 | 20 | <b>PDB header:</b> hydrolase<br><b>Chain:</b> A: <b>PDB Molecule:</b> cellulose 1,4-beta-cellobiosidase;<br><b>PDBTitle:</b> structural basis for the exocellulase activity of the2 cellobiohydrolase cbha from c. thermocellum                             |
| 16 | <a href="#">c3x17B</a>  |  Alignment   |    | 100.0 | 22 | <b>PDB header:</b> hydrolase<br><b>Chain:</b> B: <b>PDB Molecule:</b> endoglucanase;<br><b>PDBTitle:</b> crystal structure of metagenome-derived glycoside hydrolase family 92 endoglucanase                                                                |
| 17 | <a href="#">c5dgrB</a>  |  Alignment   |   | 100.0 | 17 | <b>PDB header:</b> hydrolase<br><b>Chain:</b> B: <b>PDB Molecule:</b> putative endoglucanase-related protein;<br><b>PDBTitle:</b> crystal structure of gh9 exo-beta-d-glucosaminidase pbpra0520,2 glucosamine complex                                       |
| 18 | <a href="#">c3h7IC</a>  |  Alignment |  | 100.0 | 18 | <b>PDB header:</b> hydrolase<br><b>Chain:</b> C: <b>PDB Molecule:</b> endoglucanase;<br><b>PDBTitle:</b> crystal structure of endoglucanase-related protein from vibrio2 parahaemolyticus                                                                   |
| 19 | <a href="#">c2xfgB</a>  |  Alignment |  | 99.6  | 11 | <b>PDB header:</b> hydrolase/sugar binding protein<br><b>Chain:</b> B: <b>PDB Molecule:</b> endoglucanase 1;<br><b>PDBTitle:</b> reassembly and co-crystallization of a family 9 processive2 endoglucanase from separately expressed gh9 and cbm3c3 modules |
| 20 | <a href="#">d1g87a2</a> |  Alignment |  | 99.1  | 12 | <b>Fold:</b> Common fold of diphtheria toxin/transcription factors/cytochrome f<br><b>Superfamily:</b> Carbohydrate-binding domain<br><b>Family:</b> Cellulose-binding domain family III                                                                    |
| 21 | <a href="#">d1tf4a2</a> |  Alignment | not modelled                                                                        | 99.1  | 8  | <b>Fold:</b> Common fold of diphtheria toxin/transcription factors/cytochrome f<br><b>Superfamily:</b> Carbohydrate-binding domain<br><b>Family:</b> Cellulose-binding domain family III                                                                    |
| 22 | <a href="#">c4v1sA</a>  |  Alignment | not modelled                                                                        | 98.8  | 9  | <b>PDB header:</b> hydrolase<br><b>Chain:</b> A: <b>PDB Molecule:</b> alpha-1,6-mannanase;<br><b>PDBTitle:</b> structure of the gh76 alpha-mannanase bt2949 from2 bacteroides thetaiotaomicron                                                              |
| 23 | <a href="#">c3wkgA</a>  |  Alignment | not modelled                                                                        | 98.7  | 15 | <b>PDB header:</b> isomerase<br><b>Chain:</b> A: <b>PDB Molecule:</b> cellobiose 2-epimerase;<br><b>PDBTitle:</b> crystal structure of cellobiose 2-epimerase in complex with2 glucosylmannose                                                              |
| 24 | <a href="#">c4c1sA</a>  |  Alignment | not modelled                                                                        | 98.7  | 11 | <b>PDB header:</b> hydrolase<br><b>Chain:</b> A: <b>PDB Molecule:</b> glycoside hydrolase family 76 mannosidase;<br><b>PDBTitle:</b> glycoside hydrolase family 76 (mannosidase) bt3792 from2 bacteroides thetaiotaomicron vpi-5482                         |
| 25 | <a href="#">c3vw5B</a>  |  Alignment | not modelled                                                                        | 98.5  | 14 | <b>PDB header:</b> isomerase<br><b>Chain:</b> B: <b>PDB Molecule:</b> cellobiose 2-epimerase;<br><b>PDBTitle:</b> crystal structure of sugar epimerase from ruminal bacterium                                                                               |
| 26 | <a href="#">c4qk0C</a>  |  Alignment | not modelled                                                                        | 98.5  | 15 | <b>PDB header:</b> hydrolase<br><b>Chain:</b> C: <b>PDB Molecule:</b> gh127 beta-l-arabinofuranoside;<br><b>PDBTitle:</b> crystal structure of ara127n-se, a gh127 beta-l-arabinofuranosidase2 from geobacillus stearothermophilus t6                       |
| 27 | <a href="#">c3wksA</a>  |  Alignment | not modelled                                                                        | 98.4  | 21 | <b>PDB header:</b> hydrolase<br><b>Chain:</b> A: <b>PDB Molecule:</b> non-reducing end beta-l-arabinofuranosidase;<br><b>PDBTitle:</b> crystal structure of gh127 beta-l-arabinofuranosidase hypba1 from2 bifidobacterium longum arabinose complex form     |
| 28 | <a href="#">c4z4A</a>   |  Alignment | not modelled                                                                        | 98.3  | 13 | <b>PDB header:</b> isomerase<br><b>Chain:</b> A: <b>PDB Molecule:</b> cellobiose 2-epimerase;                                                                                                                                                               |

|    |                         |           |              |      |    |                                                                                                                                                                                                                                                                                                                     |
|----|-------------------------|-----------|--------------|------|----|---------------------------------------------------------------------------------------------------------------------------------------------------------------------------------------------------------------------------------------------------------------------------------------------------------------------|
| 28 | <a href="#">c4z4A</a>   | Alignment | not modelled | 98.3 | 13 | <b>PDBTitle:</b> crystal structure of cellobiose 2-epimerase from caldicellulosiruptor2 saccharolyticus dsm 8903<br><b>PDB header:</b> structural genomics, unknown function<br><b>Chain:</b> A: <b>PDB Molecule:</b> lin0763 protein;                                                                              |
| 29 | <a href="#">c3k7xA</a>  | Alignment | not modelled | 98.3 | 11 | <b>PDBTitle:</b> crystal structure of the lin0763 protein from listeria innocua.2 northeast structural genomics consortium target lkr23.                                                                                                                                                                            |
| 30 | <a href="#">c2wo4A</a>  | Alignment | not modelled | 98.2 | 16 | <b>PDB header:</b> hydrolase<br><b>Chain:</b> A: <b>PDB Molecule:</b> glycoside hydrolase, family 9;<br><b>PDBTitle:</b> 3b' carbohydrate-binding module from the cel9v glycoside2 hydrolase from clostridium thermocellum, in-house data                                                                           |
| 31 | <a href="#">c4b9pA</a>  | Alignment | not modelled | 98.2 | 17 | <b>PDB header:</b> carbohydrate-binding protein<br><b>Chain:</b> A: <b>PDB Molecule:</b> type 3a cellulose-binding domain protein;<br><b>PDBTitle:</b> biomass sensing module from putative rsgi2 protein of2 clostridium thermocellum resemble family 3 carbohydrate-3 binding module of cellulosome               |
| 32 | <a href="#">c4bojC</a>  | Alignment | not modelled | 98.0 | 13 | <b>PDB header:</b> hydrolase<br><b>Chain:</b> C: <b>PDB Molecule:</b> alpha-1,6-mannanase;<br><b>PDBTitle:</b> crystal structure of bacillus circulans tn-31 aman6 in2 complex with mannobiose                                                                                                                      |
| 33 | <a href="#">d1nbca</a>  | Alignment | not modelled | 98.0 | 15 | <b>Fold:</b> Common fold of diphtheria toxin/transcription factors/cytochrome f<br><b>Superfamily:</b> Carbohydrate-binding domain<br><b>Family:</b> Cellulose-binding domain family III                                                                                                                            |
| 34 | <a href="#">c5mqoA</a>  | Alignment | not modelled | 98.0 | 12 | <b>PDB header:</b> hydrolase<br><b>Chain:</b> A: <b>PDB Molecule:</b> non-reducing end beta-l-arabinofuranosidase;<br><b>PDBTitle:</b> glycoside hydrolase bt_1003                                                                                                                                                  |
| 35 | <a href="#">c2l8aA</a>  | Alignment | not modelled | 97.9 | 17 | <b>PDB header:</b> hydrolase<br><b>Chain:</b> A: <b>PDB Molecule:</b> endoglucanase;<br><b>PDBTitle:</b> structure of a novel cbm3 lacking the calcium-binding site                                                                                                                                                 |
| 36 | <a href="#">d1g43a</a>  | Alignment | not modelled | 97.8 | 17 | <b>Fold:</b> Common fold of diphtheria toxin/transcription factors/cytochrome f<br><b>Superfamily:</b> Carbohydrate-binding domain<br><b>Family:</b> Cellulose-binding domain family III                                                                                                                            |
| 37 | <a href="#">c3gt5A</a>  | Alignment | not modelled | 97.8 | 15 | <b>PDB header:</b> isomerase<br><b>Chain:</b> A: <b>PDB Molecule:</b> n-acetylglucosamine 2-epimerase;<br><b>PDBTitle:</b> crystal structure of an n-acetylglucosamine 2-epimerase family protein2 from xylella fastidiosa                                                                                          |
| 38 | <a href="#">c3zqwA</a>  | Alignment | not modelled | 97.7 | 15 | <b>PDB header:</b> carbohydrate-binding protein<br><b>Chain:</b> A: <b>PDB Molecule:</b> cellulosomal scaffoldin;<br><b>PDBTitle:</b> structure of cbm3b of major scaffoldin subunit scaa from2 acetivibrio cellulolyticus                                                                                          |
| 39 | <a href="#">c4b97A</a>  | Alignment | not modelled | 97.6 | 20 | <b>PDB header:</b> sugar binding protein<br><b>Chain:</b> A: <b>PDB Molecule:</b> cellulose binding domain-containing protein;<br><b>PDBTitle:</b> biomass sensing modules from putative rsgi-like proteins2 of clostridium thermocellum resemble family 3 carbohydrate-3 binding module of cellulosome             |
| 40 | <a href="#">c4mu9B</a>  | Alignment | not modelled | 97.5 | 10 | <b>PDB header:</b> hydrolase<br><b>Chain:</b> B: <b>PDB Molecule:</b> glycoside hydrolase family 73;<br><b>PDBTitle:</b> crystal structure of a putative glycosylhydrolase (bt_3782) from2 bacteroides thetaiotaomicron vpi-5482 at 1.89 a resolution                                                               |
| 41 | <a href="#">c2xbtA</a>  | Alignment | not modelled | 97.5 | 14 | <b>PDB header:</b> sugar binding protein<br><b>Chain:</b> A: <b>PDB Molecule:</b> cellulosomal scaffoldin;<br><b>PDBTitle:</b> structure of a scaffoldin carbohydrate-binding module family 3b from2 the cellulosome of bacteroides cellulosolvens: structural diversity3 and implications for carbohydrate binding |
| 42 | <a href="#">c4b9cA</a>  | Alignment | not modelled | 97.3 | 10 | <b>PDB header:</b> carbohydrate-binding protein<br><b>Chain:</b> A: <b>PDB Molecule:</b> type 3a cellulose-binding domain protein;<br><b>PDBTitle:</b> biomass sensing modules from putative rsgi-like proteins2 of clostridium thermocellum resemble family 3 carbohydrate-3 binding module of cellulosome         |
| 43 | <a href="#">d1nc5a</a>  | Alignment | not modelled | 97.2 | 15 | <b>Fold:</b> alpha/alpha toroid<br><b>Superfamily:</b> Six-hairpin glycosidases<br><b>Family:</b> Hypothetical protein YteR                                                                                                                                                                                         |
| 44 | <a href="#">c2yIkD</a>  | Alignment | not modelled | 97.1 | 17 | <b>PDB header:</b> hydrolase<br><b>Chain:</b> D: <b>PDB Molecule:</b> cellulose 1,4-beta-cellobiosidase;<br><b>PDBTitle:</b> carbohydrate-binding module cbm3b from the cellulosomal2 cellobiohydrolase 9a from clostridium thermocellum                                                                            |
| 45 | <a href="#">c4b96A</a>  | Alignment | not modelled | 97.1 | 14 | <b>PDB header:</b> sugar binding protein<br><b>Chain:</b> A: <b>PDB Molecule:</b> cellulose binding domain-containing protein;<br><b>PDBTitle:</b> family 3b carbohydrate-binding module from the biomass2 sensing system of clostridium clariflavum                                                                |
| 46 | <a href="#">c4wu0B</a>  | Alignment | not modelled | 96.9 | 20 | <b>PDB header:</b> hydrolase<br><b>Chain:</b> B: <b>PDB Molecule:</b> similar to yter (bacillus subtilis);<br><b>PDBTitle:</b> structural analysis of c. acetobutylicum atcc 824 glycoside hydrolase2 from family 105                                                                                               |
| 47 | <a href="#">c3k11A</a>  | Alignment | not modelled | 96.7 | 20 | <b>PDB header:</b> hydrolase<br><b>Chain:</b> A: <b>PDB Molecule:</b> putative glycosyl hydrolase;<br><b>PDBTitle:</b> crystal structure of putative glycosyl hydrolase (np_813087.1) from2 bacteroides thetaiotaomicron vpi-5482 at 1.80 a resolution                                                              |
| 48 | <a href="#">c4xuvB</a>  | Alignment | not modelled | 96.7 | 13 | <b>PDB header:</b> hydrolase<br><b>Chain:</b> B: <b>PDB Molecule:</b> glycoside hydrolase family 105 protein;<br><b>PDBTitle:</b> crystal structure of a glycoside hydrolase family 105 (gh105) enzyme2 from thielavia terrestris                                                                                   |
| 49 | <a href="#">c2gz6B</a>  | Alignment | not modelled | 96.6 | 12 | <b>PDB header:</b> isomerase<br><b>Chain:</b> B: <b>PDB Molecule:</b> n-acetyl-d-glucosamine 2-epimerase;<br><b>PDBTitle:</b> crystal structure of anabaena sp. ch1 n-acetyl-d-glucosamine 2-2 epimerase at 2.0 a                                                                                                   |
| 50 | <a href="#">c5no8A</a>  | Alignment | not modelled | 96.6 | 15 | <b>PDB header:</b> lyase<br><b>Chain:</b> A: <b>PDB Molecule:</b> bacell_00875;<br><b>PDBTitle:</b> polysaccharide lyase bacell_00875                                                                                                                                                                               |
| 51 | <a href="#">c3pmmA</a>  | Alignment | not modelled | 96.0 | 15 | <b>PDB header:</b> hydrolase<br><b>Chain:</b> A: <b>PDB Molecule:</b> putative cytoplasmic protein;<br><b>PDBTitle:</b> the crystal structure of a possible member of gh105 family from2 klebsiella pneumoniae subsp. pneumoniae mgh 78578                                                                          |
| 52 | <a href="#">d2afaa1</a> | Alignment | not modelled | 95.5 | 15 | <b>Fold:</b> alpha/alpha toroid<br><b>Superfamily:</b> Six-hairpin glycosidases<br><b>Family:</b> N-acylglucosamine (NAG) epimerase                                                                                                                                                                                 |



|    |                         |           |              |      |    |                                                                                                                                                                                                                                                                                |
|----|-------------------------|-----------|--------------|------|----|--------------------------------------------------------------------------------------------------------------------------------------------------------------------------------------------------------------------------------------------------------------------------------|
| 53 | <a href="#">c4ce7B</a>  | Alignment | not modelled | 94.3 | 11 | <b>PDB header:</b> hydrolase<br><b>Chain:</b> B: <b>PDB Molecule:</b> unsaturated 3s-rhamnoglucuronyl hydrolase;<br><b>PDBTitle:</b> crystal structure of a novel unsaturated beta-glucuronyl2 hydrolase enzyme, belonging to family gh105, involved in3 ulvan degradation     |
| 54 | <a href="#">d2d5ja1</a> | Alignment | not modelled | 93.6 | 13 | <b>Fold:</b> alpha/alpha toroid<br><b>Superfamily:</b> Six-hairpin glycosidases<br><b>Family:</b> Glycosyl Hydrolase Family 88                                                                                                                                                 |
| 55 | <a href="#">d1fp3a</a>  | Alignment | not modelled | 93.5 | 17 | <b>Fold:</b> alpha/alpha toroid<br><b>Superfamily:</b> Six-hairpin glycosidases<br><b>Family:</b> N-acylglucosamine (NAG) epimerase                                                                                                                                            |
| 56 | <a href="#">c2zrzA</a>  | Alignment | not modelled | 93.5 | 14 | <b>PDB header:</b> hydrolase<br><b>Chain:</b> A: <b>PDB Molecule:</b> unsaturated glucuronyl hydrolase;<br><b>PDBTitle:</b> crystal structure of unsaturated glucuronyl hydrolase from2 streptococcus agalactiae                                                               |
| 57 | <a href="#">c3e6uA</a>  | Alignment | not modelled | 91.1 | 17 | <b>PDB header:</b> signaling protein<br><b>Chain:</b> A: <b>PDB Molecule:</b> lanc-like protein 1;<br><b>PDBTitle:</b> crystal structure of human lanc11                                                                                                                       |
| 58 | <a href="#">c5noaA</a>  | Alignment | not modelled | 87.6 | 12 | <b>PDB header:</b> hydrolase<br><b>Chain:</b> A: <b>PDB Molecule:</b> family 88 glycosyl hydrolase;<br><b>PDBTitle:</b> polysaccharide lyase baccell_00875                                                                                                                     |
| 59 | <a href="#">c3wiwA</a>  | Alignment | not modelled | 87.6 | 12 | <b>PDB header:</b> hydrolase<br><b>Chain:</b> A: <b>PDB Molecule:</b> glycosyl hydrolase family 88;<br><b>PDBTitle:</b> crystal structure of unsaturated glucuronyl hydrolase specific for2 heparin                                                                            |
| 60 | <a href="#">c4q88B</a>  | Alignment | not modelled | 86.6 | 9  | <b>PDB header:</b> structural genomics, unknown function<br><b>Chain:</b> B: <b>PDB Molecule:</b> uncharacterized protein;<br><b>PDBTitle:</b> glycosyl hydrolase family 88 from bacteroides vulgatus                                                                          |
| 61 | <a href="#">c1w6kA</a>  | Alignment | not modelled | 86.4 | 10 | <b>PDB header:</b> isomerase<br><b>Chain:</b> A: <b>PDB Molecule:</b> lanosterol synthase;<br><b>PDBTitle:</b> structure of human osc in complex with lanosterol                                                                                                               |
| 62 | <a href="#">c3ndyG</a>  | Alignment | not modelled | 86.0 | 19 | <b>PDB header:</b> hydrolase<br><b>Chain:</b> G: <b>PDB Molecule:</b> endoglucanase d;<br><b>PDBTitle:</b> the structure of the catalytic and carbohydrate binding domain of2 endoglucanase d from clostridium cellulovorans                                                   |
| 63 | <a href="#">c4pw2A</a>  | Alignment | not modelled | 85.1 | 18 | <b>PDB header:</b> isomerase<br><b>Chain:</b> A: <b>PDB Molecule:</b> d-glucuronyl c5 epimerase b;<br><b>PDBTitle:</b> crystal structure of d-glucuronyl c5 epimerase                                                                                                          |
| 64 | <a href="#">d1gxma</a>  | Alignment | not modelled | 84.4 | 20 | <b>Fold:</b> alpha/alpha toroid<br><b>Superfamily:</b> Family 10 polysaccharide lyase<br><b>Family:</b> Family 10 polysaccharide lyase                                                                                                                                         |
| 65 | <a href="#">c2rttA</a>  | Alignment | not modelled | 84.0 | 18 | <b>PDB header:</b> hydrolase<br><b>Chain:</b> A: <b>PDB Molecule:</b> chic;<br><b>PDBTitle:</b> solution structure of the chitin-binding domain of chi18ac from2 streptomyces coelicolor                                                                                       |
| 66 | <a href="#">d1exha</a>  | Alignment | not modelled | 84.0 | 21 | <b>Fold:</b> Common fold of diphtheria toxin/transcription factors/cytochrome f<br><b>Superfamily:</b> Carbohydrate-binding domain<br><b>Family:</b> Cellulose-binding domain family II                                                                                        |
| 67 | <a href="#">c5a29A</a>  | Alignment | not modelled | 78.3 | 32 | <b>PDB header:</b> lyase<br><b>Chain:</b> A: <b>PDB Molecule:</b> exopolysaccharide lyase;<br><b>PDBTitle:</b> family 2 pectate lyase from vibrio vulnificus                                                                                                                   |
| 68 | <a href="#">c2kmgA</a>  | Alignment | not modelled | 72.2 | 17 | <b>PDB header:</b> gene regulation<br><b>Chain:</b> A: <b>PDB Molecule:</b> klca;<br><b>PDBTitle:</b> the structure of the klca and ardb proteins show a novel2 fold and antirestriction activity against type i dna3 restriction systems in vivo but not in vitro             |
| 69 | <a href="#">d1qaza</a>  | Alignment | not modelled | 67.5 | 14 | <b>Fold:</b> alpha/alpha toroid<br><b>Superfamily:</b> Chondroitin AC/alginate lyase<br><b>Family:</b> Alginate lyase A1-III                                                                                                                                                   |
| 70 | <a href="#">d1r76a</a>  | Alignment | not modelled | 65.8 | 12 | <b>Fold:</b> alpha/alpha toroid<br><b>Superfamily:</b> Family 10 polysaccharide lyase<br><b>Family:</b> Family 10 polysaccharide lyase                                                                                                                                         |
| 71 | <a href="#">c4ayqA</a>  | Alignment | not modelled | 56.5 | 24 | <b>PDB header:</b> hydrolase<br><b>Chain:</b> A: <b>PDB Molecule:</b> mannosyl-oligosaccharide 1,2-alpha-mannosidase;<br><b>PDBTitle:</b> structure of the gh47 processing alpha-1,2-mannosidase from2 caulobacter strain k31 in complex with mannoimidazole                   |
| 72 | <a href="#">c1krfA</a>  | Alignment | not modelled | 54.8 | 18 | <b>PDB header:</b> hydrolase<br><b>Chain:</b> A: <b>PDB Molecule:</b> mannosyl-oligosaccharide alpha-1,2-mannosidase;<br><b>PDBTitle:</b> structure of p. citrinum alpha 1,2-mannosidase reveals the basis for2 differences in specificity of the er and golgi class i enzymes |
| 73 | <a href="#">d2ri9a1</a> | Alignment | not modelled | 54.8 | 18 | <b>Fold:</b> alpha/alpha toroid<br><b>Superfamily:</b> Seven-hairpin glycosidases<br><b>Family:</b> Class I alpha-1;2-mannosidase, catalytic domain                                                                                                                            |
| 74 | <a href="#">d1hcua</a>  | Alignment | not modelled | 45.5 | 21 | <b>Fold:</b> alpha/alpha toroid<br><b>Superfamily:</b> Seven-hairpin glycosidases<br><b>Family:</b> Class I alpha-1;2-mannosidase, catalytic domain                                                                                                                            |
| 75 | <a href="#">c2v8kA</a>  | Alignment | not modelled | 40.5 | 18 | <b>PDB header:</b> lyase<br><b>Chain:</b> A: <b>PDB Molecule:</b> pectate lyase;<br><b>PDBTitle:</b> structure of a family 2 pectate lyase in complex with2 trigalacturonic acid                                                                                               |
| 76 | <a href="#">d1x9da1</a> | Alignment | not modelled | 38.1 | 24 | <b>Fold:</b> alpha/alpha toroid<br><b>Superfamily:</b> Seven-hairpin glycosidases<br><b>Family:</b> Class I alpha-1;2-mannosidase, catalytic domain                                                                                                                            |
| 77 | <a href="#">c1x9dA</a>  | Alignment | not modelled | 38.1 | 24 | <b>PDB header:</b> hydrolase<br><b>Chain:</b> A: <b>PDB Molecule:</b> endoplasmic reticulum mannosyl-oligosaccharide 1,2-alpha-<br><b>PDBTitle:</b> crystal structure of human class i alpha-1,2-mannosidase in complex2 with thio-disaccharide substrate analogue             |

|    |                         |           |              |      |    |                                                                                                                                                                                                                                            |
|----|-------------------------|-----------|--------------|------|----|--------------------------------------------------------------------------------------------------------------------------------------------------------------------------------------------------------------------------------------------|
| 78 | <a href="#">c3t33A_</a> | Alignment | not modelled | 36.7 | 13 | <b>PDB header:</b> signaling protein receptor<br><b>Chain:</b> A: <b>PDB Molecule:</b> g protein coupled receptor;<br><b>PDBTitle:</b> crystal structure of arabidopsis gcr2                                                               |
| 79 | <a href="#">d1dl2a_</a> | Alignment | not modelled | 35.8 | 24 | <b>Fold:</b> alpha/alpha toroid<br><b>Superfamily:</b> Seven-hairpin glycosidases<br><b>Family:</b> Class I alpha-1,2-mannosidase, catalytic domain                                                                                        |
| 80 | <a href="#">d1nxca_</a> | Alignment | not modelled | 35.0 | 17 | <b>Fold:</b> alpha/alpha toroid<br><b>Superfamily:</b> Seven-hairpin glycosidases<br><b>Family:</b> Class I alpha-1,2-mannosidase, catalytic domain                                                                                        |
| 81 | <a href="#">c1g6iA_</a> | Alignment | not modelled | 33.1 | 24 | <b>PDB header:</b> hydrolase<br><b>Chain:</b> A: <b>PDB Molecule:</b> class i alpha-1,2-mannosidase;<br><b>PDBTitle:</b> crystal structure of the yeast alpha-1,2-mannosidase with bound 1-2 deoxymannojirimycin at 1.59 a resolution      |
| 82 | <a href="#">c4ok2A_</a> | Alignment | not modelled | 29.5 | 18 | <b>PDB header:</b> lyase<br><b>Chain:</b> A: <b>PDB Molecule:</b> putative alginate lyase;<br><b>PDBTitle:</b> crystal structure of alg17c mutant y258a                                                                                    |
| 83 | <a href="#">d1tzaa_</a> | Alignment | not modelled | 25.5 | 23 | <b>Fold:</b> Immunoglobulin-like beta-sandwich<br><b>Superfamily:</b> ApaG-like<br><b>Family:</b> ApaG-like                                                                                                                                |
| 84 | <a href="#">c4ozwA_</a> | Alignment | not modelled | 23.8 | 15 | <b>PDB header:</b> lyase<br><b>Chain:</b> A: <b>PDB Molecule:</b> alginate lyase;<br><b>PDBTitle:</b> crystal structure of the periplasmic alginate lyase algI h202a mutant                                                                |
| 85 | <a href="#">c2fuqA_</a> | Alignment | not modelled | 23.2 | 8  | <b>PDB header:</b> sugar binding protein<br><b>Chain:</b> A: <b>PDB Molecule:</b> heparinase ii protein;<br><b>PDBTitle:</b> crystal structure of heparinase ii                                                                            |
| 86 | <a href="#">c3nfvA_</a> | Alignment | not modelled | 21.5 | 17 | <b>PDB header:</b> lyase<br><b>Chain:</b> A: <b>PDB Molecule:</b> alginate lyase;<br><b>PDBTitle:</b> crystal structure of an alginate lyase (bacova_01668) from bacteroides2 ovatus at 1.95 a resolution                                  |
| 87 | <a href="#">d1l1aa3</a> | Alignment | not modelled | 21.4 | 22 | <b>Fold:</b> Immunoglobulin-like beta-sandwich<br><b>Superfamily:</b> E set domains<br><b>Family:</b> Arthropod hemocyanin, C-terminal domain                                                                                              |
| 88 | <a href="#">c5hdwA_</a> | Alignment | not modelled | 19.1 | 13 | <b>PDB header:</b> protein binding<br><b>Chain:</b> A: <b>PDB Molecule:</b> f-box only protein 3;<br><b>PDBTitle:</b> apag domain of fbx03                                                                                                 |
| 89 | <a href="#">d1xvsa_</a> | Alignment | not modelled | 19.1 | 18 | <b>Fold:</b> Immunoglobulin-like beta-sandwich<br><b>Superfamily:</b> ApaG-like<br><b>Family:</b> ApaG-like                                                                                                                                |
| 90 | <a href="#">c3a0oB_</a> | Alignment | not modelled | 19.0 | 12 | <b>PDB header:</b> lyase<br><b>Chain:</b> B: <b>PDB Molecule:</b> oligo alginate lyase;<br><b>PDBTitle:</b> crystal structure of alginate lyase from agrobacterium tumefaciens c58                                                         |
| 91 | <a href="#">d1f53a_</a> | Alignment | not modelled | 18.3 | 64 | <b>Fold:</b> gamma-Crystallin-like<br><b>Superfamily:</b> gamma-Crystallin-like<br><b>Family:</b> Killer toxin-like protein SKLP                                                                                                           |
| 92 | <a href="#">c5bp8A_</a> | Alignment | not modelled | 17.7 | 14 | <b>PDB header:</b> isomerase<br><b>Chain:</b> A: <b>PDB Molecule:</b> ent-copalyl diphosphate synthase;<br><b>PDBTitle:</b> ent-copalyl diphosphate synthase from streptomyces platensis                                                   |
| 93 | <a href="#">c2f1eA_</a> | Alignment | not modelled | 16.9 | 25 | <b>PDB header:</b> structural genomics, unknown function<br><b>Chain:</b> A: <b>PDB Molecule:</b> protein apag;<br><b>PDBTitle:</b> solution structure of apag protein                                                                     |
| 94 | <a href="#">c2laaA_</a> | Alignment | not modelled | 16.7 | 15 | <b>PDB header:</b> hydrolase<br><b>Chain:</b> A: <b>PDB Molecule:</b> beta/alpha-amylase;<br><b>PDBTitle:</b> solution structure of the cbm25-1 of beta/alpha-amylase from2 paenibacillus polymyxa                                         |
| 95 | <a href="#">c1ug9A_</a> | Alignment | not modelled | 15.5 | 20 | <b>PDB header:</b> hydrolase<br><b>Chain:</b> A: <b>PDB Molecule:</b> glucodextranase;<br><b>PDBTitle:</b> crystal structure of glucodextranase from arthrobacter globiformis i42                                                          |
| 96 | <a href="#">d1w8oa1</a> | Alignment | not modelled | 14.3 | 20 | <b>Fold:</b> Immunoglobulin-like beta-sandwich<br><b>Superfamily:</b> E set domains<br><b>Family:</b> E-set domains of sugar-utilizing enzymes                                                                                             |
| 97 | <a href="#">c5eurC_</a> | Alignment | not modelled | 13.4 | 56 | <b>PDB header:</b> unknown function<br><b>Chain:</b> C: <b>PDB Molecule:</b> uncharacterized protein;<br><b>PDBTitle:</b> hypothetical protein sf216 from shigella flexneri 5a m90t                                                        |
| 98 | <a href="#">d2g0da1</a> | Alignment | not modelled | 13.4 | 12 | <b>Fold:</b> alpha/alpha toroid<br><b>Superfamily:</b> LanC-like<br><b>Family:</b> LanC-like                                                                                                                                               |
| 99 | <a href="#">c3q7aB_</a> | Alignment | not modelled | 12.6 | 17 | <b>PDB header:</b> transferase/transferase inhibitor<br><b>Chain:</b> B: <b>PDB Molecule:</b> farnesyltransferase beta subunit;<br><b>PDBTitle:</b> cryptococcus neoformans protein farnesyltransferase in complex with2 fpp and I-778,123 |

# Phyre2

|               |                              |
|---------------|------------------------------|
| Email         | siddhartha_kundu@yahoo.co.in |
| Description   | Q93WY9__                     |
| Date          | Sat Aug 15 22:30:43 BST 2015 |
| Unique Job ID | 5130cfbdfa612b38             |

Detailed template information

| #  | Template                | Alignment Coverage                                                                               | 3D Model                                                                            | Confidence | % i.d. | Template Information                                                                                                                                                                                                                                        |
|----|-------------------------|--------------------------------------------------------------------------------------------------|-------------------------------------------------------------------------------------|------------|--------|-------------------------------------------------------------------------------------------------------------------------------------------------------------------------------------------------------------------------------------------------------------|
| 1  | <a href="#">c1ga2A_</a> | 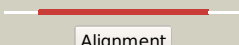<br>Alignment   |    | 100.0      | 33     | <b>PDB header:</b> hydrolase<br><b>Chain:</b> A: <b>PDB Molecule:</b> endoglucanase 9g;<br><b>PDBTitle:</b> the crystal structure of endoglucanase 9g from clostridium2 cellulolyticum complexed with cellobiose                                            |
| 2  | <a href="#">c1js4B_</a> | <br>Alignment   |    | 100.0      | 39     | <b>PDB header:</b> glycosyl hydrolase<br><b>Chain:</b> B: <b>PDB Molecule:</b> endo/exocellulase e4;<br><b>PDBTitle:</b> endo/exocellulase:cellobiose from thermomonospora                                                                                  |
| 3  | <a href="#">d1g87a1</a> | <br>Alignment   |    | 100.0      | 38     | <b>Fold:</b> alpha/alpha toroid<br><b>Superfamily:</b> Six-hairpin glycosidases<br><b>Family:</b> Cellulases catalytic domain                                                                                                                               |
| 4  | <a href="#">c2yikA_</a> | <br>Alignment   |    | 100.0      | 32     | <b>PDB header:</b> hydrolase<br><b>Chain:</b> A: <b>PDB Molecule:</b> endoglucanase;<br><b>PDBTitle:</b> catalytic domain of clostridium thermocellum cellt                                                                                                 |
| 5  | <a href="#">d1tf4a1</a> | <br>Alignment |  | 100.0      | 44     | <b>Fold:</b> alpha/alpha toroid<br><b>Superfamily:</b> Six-hairpin glycosidases<br><b>Family:</b> Cellulases catalytic domain                                                                                                                               |
| 6  | <a href="#">c3wc3A_</a> | <br>Alignment |  | 100.0      | 44     | <b>PDB header:</b> hydrolase<br><b>Chain:</b> A: <b>PDB Molecule:</b> endo-1, 4-beta-glucanase;<br><b>PDBTitle:</b> crystal structure of endo-1,4-beta-glucanase from eisenia fetida                                                                        |
| 7  | <a href="#">c2xfqA_</a> | <br>Alignment |  | 100.0      | 41     | <b>PDB header:</b> hydrolase/sugar binding protein<br><b>Chain:</b> A: <b>PDB Molecule:</b> endoglucanase 1;<br><b>PDBTitle:</b> reassembly and co-crystallization of a family 9 processive2 endoglucanase from separately expressed gh9 and cbm3c3 modules |
| 8  | <a href="#">d1ks8a_</a> | <br>Alignment |  | 100.0      | 47     | <b>Fold:</b> alpha/alpha toroid<br><b>Superfamily:</b> Six-hairpin glycosidases<br><b>Family:</b> Cellulases catalytic domain                                                                                                                               |
| 9  | <a href="#">d1ia6a_</a> | <br>Alignment |  | 100.0      | 35     | <b>Fold:</b> alpha/alpha toroid<br><b>Superfamily:</b> Six-hairpin glycosidases<br><b>Family:</b> Cellulases catalytic domain                                                                                                                               |
| 10 | <a href="#">d1ut9a1</a> | <br>Alignment |  | 100.0      | 21     | <b>Fold:</b> alpha/alpha toroid<br><b>Superfamily:</b> Six-hairpin glycosidases<br><b>Family:</b> Cellulases catalytic domain                                                                                                                               |
| 11 | <a href="#">c3gzkA_</a> | <br>Alignment |  | 100.0      | 21     | <b>PDB header:</b> hydrolase<br><b>Chain:</b> A: <b>PDB Molecule:</b> cellulase;<br><b>PDBTitle:</b> structure of a. acidocaldarius cellulase cela                                                                                                          |

|    |                         |                                                                                               |                                                                                     |       |    |                                                                                                                                                                                                                                                                                                         |
|----|-------------------------|-----------------------------------------------------------------------------------------------|-------------------------------------------------------------------------------------|-------|----|---------------------------------------------------------------------------------------------------------------------------------------------------------------------------------------------------------------------------------------------------------------------------------------------------------|
| 12 | <a href="#">c1clcA</a>  | 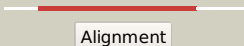 Alignment   |     | 100.0 | 21 | <b>PDB header:</b> glycosyl hydrolase<br><b>Chain:</b> A: <b>PDB Molecule:</b> endoglucanase celd; ec: 3.2.1.4;<br><b>PDBTitle:</b> three-dimensional structure of endoglucanase d at 1.92 angstroms resolution                                                                                         |
| 13 | <a href="#">c1ut9A</a>  |  Alignment   |    | 100.0 | 22 | <b>PDB header:</b> hydrolase<br><b>Chain:</b> A: <b>PDB Molecule:</b> cellulose 1,4-beta-cellobiosidase;<br><b>PDBTitle:</b> structural basis for the exocellulase activity of the2 cellobiohydrolase cbha from c. thermocellum                                                                         |
| 14 | <a href="#">d1clca1</a> |  Alignment   |    | 100.0 | 21 | <b>Fold:</b> alpha/alpha toroid<br><b>Superfamily:</b> Six-hairpin glycosidases<br><b>Family:</b> Cellulases catalytic domain                                                                                                                                                                           |
| 15 | <a href="#">c3x17B</a>  |  Alignment   |    | 100.0 | 23 | <b>PDB header:</b> hydrolase<br><b>Chain:</b> B: <b>PDB Molecule:</b> endoglucanase;<br><b>PDBTitle:</b> crystal structure of metagenome-derived glycoside hydrolase family 92 endoglucanase                                                                                                            |
| 16 | <a href="#">c3h71C</a>  |  Alignment   |    | 100.0 | 17 | <b>PDB header:</b> hydrolase<br><b>Chain:</b> C: <b>PDB Molecule:</b> endoglucanase;<br><b>PDBTitle:</b> crystal structure of endoglucanase-related protein from vibrio2 paraohaemolyticus                                                                                                              |
| 17 | <a href="#">c2xfgB</a>  |  Alignment   |    | 99.8  | 20 | <b>PDB header:</b> hydrolase/sugar binding protein<br><b>Chain:</b> B: <b>PDB Molecule:</b> endoglucanase 1;<br><b>PDBTitle:</b> reassembly and co-crystallization of a family 9 processive2 endoglucanase from separately expressed gh9 and cbm3c3 modules                                             |
| 18 | <a href="#">d1tf4a2</a> |  Alignment |  | 99.4  | 16 | <b>Fold:</b> Common fold of diphtheria toxin/transcription factors/cytochrome f<br><b>Superfamily:</b> Carbohydrate-binding domain<br><b>Family:</b> Cellulose-binding domain family III                                                                                                                |
| 19 | <a href="#">d1g87a2</a> |  Alignment |  | 99.4  | 12 | <b>Fold:</b> Common fold of diphtheria toxin/transcription factors/cytochrome f<br><b>Superfamily:</b> Carbohydrate-binding domain<br><b>Family:</b> Cellulose-binding domain family III                                                                                                                |
| 20 | <a href="#">c4b9pA</a>  |  Alignment |  | 98.8  | 17 | <b>PDB header:</b> carbohydrate-binding protein<br><b>Chain:</b> A: <b>PDB Molecule:</b> type 3a cellulose-binding domain protein;<br><b>PDBTitle:</b> biomass sensing module from putative rsgi2 protein of2 clostridium thermocellum resemble family 3 carbohydrate-3 binding module of cellulosome   |
| 21 | <a href="#">c4v1sA</a>  |  Alignment | not modelled                                                                        | 98.7  | 9  | <b>PDB header:</b> hydrolase<br><b>Chain:</b> A: <b>PDB Molecule:</b> alpha-1,6-mannanase;<br><b>PDBTitle:</b> structure of the gh76 alpha-mannanase bt2949 from2 bacteroides thetaiotaomicron                                                                                                          |
| 22 | <a href="#">d1g43a</a>  |  Alignment | not modelled                                                                        | 98.7  | 17 | <b>Fold:</b> Common fold of diphtheria toxin/transcription factors/cytochrome f<br><b>Superfamily:</b> Carbohydrate-binding domain<br><b>Family:</b> Cellulose-binding domain family III                                                                                                                |
| 23 | <a href="#">d1nbca</a>  |  Alignment | not modelled                                                                        | 98.7  | 12 | <b>Fold:</b> Common fold of diphtheria toxin/transcription factors/cytochrome f<br><b>Superfamily:</b> Carbohydrate-binding domain<br><b>Family:</b> Cellulose-binding domain family III                                                                                                                |
| 24 | <a href="#">c2wo4A</a>  |  Alignment | not modelled                                                                        | 98.7  | 15 | <b>PDB header:</b> hydrolase<br><b>Chain:</b> A: <b>PDB Molecule:</b> glycoside hydrolase, family 9;<br><b>PDBTitle:</b> 3b' carbohydrate-binding module from the cel9v glycoside2 hydrolase from clostridium thermocellum, in-house data                                                               |
| 25 | <a href="#">c2l8aA</a>  |  Alignment | not modelled                                                                        | 98.6  | 13 | <b>PDB header:</b> hydrolase<br><b>Chain:</b> A: <b>PDB Molecule:</b> endoglucanase;<br><b>PDBTitle:</b> structure of a novel cbm3 lacking the calcium-binding site                                                                                                                                     |
| 26 | <a href="#">c4b97A</a>  |  Alignment | not modelled                                                                        | 98.6  | 14 | <b>PDB header:</b> sugar binding protein<br><b>Chain:</b> A: <b>PDB Molecule:</b> cellulose binding domain-containing protein;<br><b>PDBTitle:</b> biomass sensing modules from putative rsgi-like proteins2 of clostridium thermocellum resemble family 3 carbohydrate-3 binding module of cellulosome |
| 27 | <a href="#">c4c1sA</a>  |  Alignment | not modelled                                                                        | 98.6  | 14 | <b>PDB header:</b> hydrolase<br><b>Chain:</b> A: <b>PDB Molecule:</b> glycoside hydrolase family 76 mannosidase;<br><b>PDBTitle:</b> glycoside hydrolase family 76 (mannosidase) bt3792 from2 bacteroides thetaiotaomicron vpi-5482                                                                     |
|    |                         |            |                                                                                     |       |    | <b>PDB header:</b> carbohydrate-binding protein                                                                                                                                                                                                                                                         |

|    |                         |           |              |      |    |                                                                                                                                                                                                                                                                                                                     |
|----|-------------------------|-----------|--------------|------|----|---------------------------------------------------------------------------------------------------------------------------------------------------------------------------------------------------------------------------------------------------------------------------------------------------------------------|
| 28 | <a href="#">c3zqwA_</a> | Alignment | not modelled | 98.5 | 14 | <b>Chain:</b> A: <b>PDB Molecule:</b> cellulosomal scarroidin;<br><b>PDBTitle:</b> structure of cbm3b of major scaffoldin subunit scaa from2 acetivibrio cellulolyticus                                                                                                                                             |
| 29 | <a href="#">c4qk0C_</a> | Alignment | not modelled | 98.5 | 14 | <b>PDB header:</b> hydrolase<br><b>Chain:</b> C: <b>PDB Molecule:</b> gh127 beta-l-arabinofuranoside;<br><b>PDBTitle:</b> crystal structure of ara127n-se, a gh127 beta-l-arabinofuranosidase2 from geobacillus stearothermophilus t6                                                                               |
| 30 | <a href="#">c3vw5B_</a> | Alignment | not modelled | 98.5 | 19 | <b>PDB header:</b> isomerase<br><b>Chain:</b> B: <b>PDB Molecule:</b> cellobiose 2-epimerase;<br><b>PDBTitle:</b> crystal structure of sugar epimerase from ruminal bacterium                                                                                                                                       |
| 31 | <a href="#">c3wkgA_</a> | Alignment | not modelled | 98.4 | 12 | <b>PDB header:</b> isomerase<br><b>Chain:</b> A: <b>PDB Molecule:</b> cellobiose 2-epimerase;<br><b>PDBTitle:</b> crystal structure of cellobiose 2-epimerase in complex with2 glucosylmannose                                                                                                                      |
| 32 | <a href="#">c2xbtA_</a> | Alignment | not modelled | 98.4 | 13 | <b>PDB header:</b> sugar binding protein<br><b>Chain:</b> A: <b>PDB Molecule:</b> cellulosomal scaffoldin;<br><b>PDBTitle:</b> structure of a scaffoldin carbohydrate-binding module family 3b from2 the cellulosome of bacteroides cellulosolvens: structural diversity3 and implications for carbohydrate binding |
| 33 | <a href="#">c3k7xA_</a> | Alignment | not modelled | 98.2 | 12 | <b>PDB header:</b> structural genomics, unknown function<br><b>Chain:</b> A: <b>PDB Molecule:</b> lin0763 protein;<br><b>PDBTitle:</b> crystal structure of the lin0763 protein from listeria2 innocua. northeast structural genomics consortium target3 lkr23.                                                     |
| 34 | <a href="#">c4b96A_</a> | Alignment | not modelled | 98.2 | 11 | <b>PDB header:</b> sugar binding protein<br><b>Chain:</b> A: <b>PDB Molecule:</b> cellulose binding domain-containing protein;<br><b>PDBTitle:</b> family 3b carbohydrate-binding module from the biomass2 sensing system of clostridium clariflavum                                                                |
| 35 | <a href="#">c3wxA_</a>  | Alignment | not modelled | 98.2 | 16 | <b>PDB header:</b> hydrolase<br><b>Chain:</b> A: <b>PDB Molecule:</b> non-reducing end beta-l-arabinofuranosidase;<br><b>PDBTitle:</b> crystal structure of gh127 beta-l-arabinofuranosidase hypba1 from2 bifidobacterium longum arabinose complex form                                                             |
| 36 | <a href="#">c4b9cA_</a> | Alignment | not modelled | 98.1 | 10 | <b>PDB header:</b> carbohydrate-binding protein<br><b>Chain:</b> A: <b>PDB Molecule:</b> type 3a cellulose-binding domain protein;<br><b>PDBTitle:</b> biomass sensing modules from putative rsgi-like proteins2 of clostridium thermocellum resemble family 3 carbohydrate-3 binding module of cellulosome         |
| 37 | <a href="#">c4bojC_</a> | Alignment | not modelled | 98.0 | 15 | <b>PDB header:</b> hydrolase<br><b>Chain:</b> C: <b>PDB Molecule:</b> alpha-1,6-mannanase;<br><b>PDBTitle:</b> crystal structure of bacillus circulans tn-31 aman6 in2 complex with mannobiose                                                                                                                      |
| 38 | <a href="#">c4mu9B_</a> | Alignment | not modelled | 98.0 | 14 | <b>PDB header:</b> hydrolase<br><b>Chain:</b> B: <b>PDB Molecule:</b> glycoside hydrolase family 73;<br><b>PDBTitle:</b> crystal structure of a putative glycosylhydrolase (bt_3782) from2 bacteroides thetaiotaomicron vpi-5482 at 1.89 a resolution                                                               |
| 39 | <a href="#">c2yIkD_</a> | Alignment | not modelled | 98.0 | 12 | <b>PDB header:</b> hydrolase<br><b>Chain:</b> D: <b>PDB Molecule:</b> cellulose 1,4-beta-cellobiosidase;<br><b>PDBTitle:</b> carbohydrate-binding module cbm3b from the cellulosomal2 cellobiohydrolase 9a from clostridium thermocellum                                                                            |
| 40 | <a href="#">c3gt5A_</a> | Alignment | not modelled | 97.6 | 17 | <b>PDB header:</b> isomerase<br><b>Chain:</b> A: <b>PDB Molecule:</b> n-acetylglucosamine 2-epimerase;<br><b>PDBTitle:</b> crystal structure of an n-acetylglucosamine 2-epimerase family protein2 from xylella fastidiosa                                                                                          |
| 41 | <a href="#">c4xuvB_</a> | Alignment | not modelled | 97.4 | 11 | <b>PDB header:</b> hydrolase<br><b>Chain:</b> B: <b>PDB Molecule:</b> glycoside hydrolase family 105 protein;<br><b>PDBTitle:</b> crystal structure of a glycoside hydrolase family 105 (gh105) enzyme2 from thielavia terrestris                                                                                   |
| 42 | <a href="#">d2d5ja1</a> | Alignment | not modelled | 97.1 | 10 | <b>Fold:</b> alpha/alpha toroid<br><b>Superfamily:</b> Six-hairpin glycosidases<br><b>Family:</b> Glycosyl Hydrolase Family 88                                                                                                                                                                                      |
| 43 | <a href="#">d1nc5a_</a> | Alignment | not modelled | 97.1 | 16 | <b>Fold:</b> alpha/alpha toroid<br><b>Superfamily:</b> Six-hairpin glycosidases<br><b>Family:</b> Hypothetical protein YteR                                                                                                                                                                                         |
| 44 | <a href="#">c4wu0B_</a> | Alignment | not modelled | 96.7 | 13 | <b>PDB header:</b> hydrolase<br><b>Chain:</b> B: <b>PDB Molecule:</b> similar to yter (bacillus subtilis);<br><b>PDBTitle:</b> structural analysis of c. acetobutylicum atcc 824 glycoside hydrolase2 from family 105                                                                                               |
| 45 | <a href="#">c2gz6B_</a> | Alignment | not modelled | 96.6 | 10 | <b>PDB header:</b> isomerase<br><b>Chain:</b> B: <b>PDB Molecule:</b> n-acetyl-d-glucosamine 2-epimerase;<br><b>PDBTitle:</b> crystal structure of anabaena sp. ch1 n-acetyl-d-glucosamine 2-2 epimerase at 2.0 a                                                                                                   |
| 46 | <a href="#">c3wiwA_</a> | Alignment | not modelled | 96.5 | 12 | <b>PDB header:</b> hydrolase<br><b>Chain:</b> A: <b>PDB Molecule:</b> glycosyl hydrolase family 88;<br><b>PDBTitle:</b> crystal structure of unsaturated glucuronyl hydrolase specific for2 heparin                                                                                                                 |
| 47 | <a href="#">d2afaa1</a> | Alignment | not modelled | 96.3 | 12 | <b>Fold:</b> alpha/alpha toroid<br><b>Superfamily:</b> Six-hairpin glycosidases<br><b>Family:</b> N-acylglucosamine (NAG) epimerase                                                                                                                                                                                 |
| 48 | <a href="#">c3pmmA_</a> | Alignment | not modelled | 95.9 | 10 | <b>PDB header:</b> hydrolase<br><b>Chain:</b> A: <b>PDB Molecule:</b> putative cytoplasmic protein;<br><b>PDBTitle:</b> the crystal structure of a possible member of gh105 family from2 klebsiella pneumoniae subsp. pneumoniae mgh 78578                                                                          |
| 49 | <a href="#">c4ce7B_</a> | Alignment | not modelled | 94.7 | 10 | <b>PDB header:</b> hydrolase<br><b>Chain:</b> B: <b>PDB Molecule:</b> unsaturated 3s-rhamnoglycuronyl hydrolase;<br><b>PDBTitle:</b> crystal structure of a novel unsaturated beta-glucuronyl2 hydrolase enzyme, belonging to family gh105, involved in3 ulvan degradation                                          |
| 50 | <a href="#">c2zzrA_</a> | Alignment | not modelled | 94.6 | 14 | <b>PDB header:</b> hydrolase<br><b>Chain:</b> A: <b>PDB Molecule:</b> unsaturated glucuronyl hydrolase;<br><b>PDBTitle:</b> crystal structure of unsaturated glucuronyl hydrolase from2 streptococcus agalactiae                                                                                                    |
| 51 | <a href="#">c3k11A_</a> | Alignment | not modelled | 92.4 | 17 | <b>PDB header:</b> hydrolase<br><b>Chain:</b> A: <b>PDB Molecule:</b> putative glycosyl hydrolase;<br><b>PDBTitle:</b> crystal structure of putative glycosyl hydrolase (np_813087.1) from2 bacteroides thetaiotaomicron vpi-5482 at 1.80 a resolution                                                              |
| 52 | <a href="#">c3e6uA_</a> | Alignment | not modelled | 89.1 | 17 | <b>PDB header:</b> signaling protein<br><b>Chain:</b> A: <b>PDB Molecule:</b> lanc-like protein 1;                                                                                                                                                                                                                  |

|    |                         |           |              |      |    |                                                                                                                                                                                                                                                                    |
|----|-------------------------|-----------|--------------|------|----|--------------------------------------------------------------------------------------------------------------------------------------------------------------------------------------------------------------------------------------------------------------------|
|    |                         |           |              |      |    | <b>PDBTitle:</b> crystal structure of human lancl1                                                                                                                                                                                                                 |
| 53 | <a href="#">d1fp3a_</a> | Alignment | not modelled | 88.7 | 15 | <b>Fold:</b> alpha/alpha toroid<br><b>Superfamily:</b> Six-hairpin glycosidases<br><b>Family:</b> N-acylglucosamine (NAG) epimerase                                                                                                                                |
| 54 | <a href="#">c1w6kA_</a> | Alignment | not modelled | 85.8 | 15 | <b>PDB header:</b> isomerase<br><b>Chain:</b> A: <b>PDB Molecule:</b> lanosterol synthase;<br><b>PDBTitle:</b> structure of human osc in complex with lanosterol                                                                                                   |
| 55 | <a href="#">c4q88B_</a> | Alignment | not modelled | 85.4 | 10 | <b>PDB header:</b> structural genomics, unknown function<br><b>Chain:</b> B: <b>PDB Molecule:</b> uncharacterized protein;<br><b>PDBTitle:</b> glycosyl hydrolase family 88 from bacteroides vulgatus                                                              |
| 56 | <a href="#">c4pw2A_</a> | Alignment | not modelled | 84.5 | 18 | <b>PDB header:</b> isomerase<br><b>Chain:</b> A: <b>PDB Molecule:</b> d-glucuronyl c5 epimerase b;<br><b>PDBTitle:</b> crystal structure of d-glucuronyl c5 epimerase                                                                                              |
| 57 | <a href="#">d1gxma_</a> | Alignment | not modelled | 80.3 | 16 | <b>Fold:</b> alpha/alpha toroid<br><b>Superfamily:</b> Family 10 polysaccharide lyase<br><b>Family:</b> Family 10 polysaccharide lyase                                                                                                                             |
| 58 | <a href="#">d1r76a_</a> | Alignment | not modelled | 77.4 | 11 | <b>Fold:</b> alpha/alpha toroid<br><b>Superfamily:</b> Family 10 polysaccharide lyase<br><b>Family:</b> Family 10 polysaccharide lyase                                                                                                                             |
| 59 | <a href="#">c5a29A_</a> | Alignment | not modelled | 77.4 | 29 | <b>PDB header:</b> lyase<br><b>Chain:</b> A: <b>PDB Molecule:</b> exopolysaccharide lyase;<br><b>PDBTitle:</b> family 2 pectate lyase from vibrio vulnificus                                                                                                       |
| 60 | <a href="#">c3t33A_</a> | Alignment | not modelled | 77.0 | 15 | <b>PDB header:</b> signaling protein receptor<br><b>Chain:</b> A: <b>PDB Molecule:</b> g protein coupled receptor;<br><b>PDBTitle:</b> crystal structure of arabidopsis gcr2                                                                                       |
| 61 | <a href="#">c3ndyG_</a> | Alignment | not modelled | 64.7 | 18 | <b>PDB header:</b> hydrolase<br><b>Chain:</b> G: <b>PDB Molecule:</b> endoglucanase d;<br><b>PDBTitle:</b> the structure of the catalytic and carbohydrate binding domain of2 endoglucanase d from clostridium cellulovorans                                       |
| 62 | <a href="#">c2kmgA_</a> | Alignment | not modelled | 63.9 | 22 | <b>PDB header:</b> gene regulation<br><b>Chain:</b> A: <b>PDB Molecule:</b> klca;<br><b>PDBTitle:</b> the structure of the klca and ardb proteins show a novel2 fold and antirestriction activity against type i dna3 restriction systems in vivo but not in vitro |
| 63 | <a href="#">d1exha_</a> | Alignment | not modelled | 62.5 | 20 | <b>Fold:</b> Common fold of diphtheria toxin/transcription factors/cytochrome f<br><b>Superfamily:</b> Carbohydrate-binding domain<br><b>Family:</b> Cellulose-binding domain family II                                                                            |
| 64 | <a href="#">c4ayqA_</a> | Alignment | not modelled | 60.4 | 10 | <b>PDB header:</b> hydrolase<br><b>Chain:</b> A: <b>PDB Molecule:</b> mannosyl-oligosaccharide 1,2-alpha-mannosidase;<br><b>PDBTitle:</b> structure of the gh47 processing alpha-1,2-mannosidase from2 caulobacter strain k31 in complex with mannoimidazole       |
| 65 | <a href="#">d1nxca_</a> | Alignment | not modelled | 59.2 | 19 | <b>Fold:</b> alpha/alpha toroid<br><b>Superfamily:</b> Seven-hairpin glycosidases<br><b>Family:</b> Class I alpha-1,2-mannosidase, catalytic domain                                                                                                                |
| 66 | <a href="#">d1dl2a_</a> | Alignment | not modelled | 58.9 | 19 | <b>Fold:</b> alpha/alpha toroid<br><b>Superfamily:</b> Seven-hairpin glycosidases<br><b>Family:</b> Class I alpha-1,2-mannosidase, catalytic domain                                                                                                                |
| 67 | <a href="#">d1x9da1</a> | Alignment | not modelled | 58.1 | 19 | <b>Fold:</b> alpha/alpha toroid<br><b>Superfamily:</b> Seven-hairpin glycosidases<br><b>Family:</b> Class I alpha-1,2-mannosidase, catalytic domain                                                                                                                |
| 68 | <a href="#">c1x9dA_</a> | Alignment | not modelled | 58.1 | 19 | <b>PDB header:</b> hydrolase<br><b>Chain:</b> A: <b>PDB Molecule:</b> endoplasmic reticulum mannosyl-oligosaccharide 1,<br><b>PDBTitle:</b> crystal structure of human class i alpha-1,2-mannosidase in2 complex with thio-disaccharide substrate analogue         |
| 69 | <a href="#">c1q6iA_</a> | Alignment | not modelled | 56.7 | 19 | <b>PDB header:</b> hydrolase<br><b>Chain:</b> A: <b>PDB Molecule:</b> class i alpha-1,2-mannosidase;<br><b>PDBTitle:</b> crystal structure of the yeast alpha-1,2-mannosidase with bound 1-2 deoxymannojirimycin at 1.59 a resolution                              |
| 70 | <a href="#">c4ok2A_</a> | Alignment | not modelled | 53.1 | 13 | <b>PDB header:</b> lyase<br><b>Chain:</b> A: <b>PDB Molecule:</b> putative alginate lyase;<br><b>PDBTitle:</b> crystal structure of alg17c mutant y258a                                                                                                            |
| 71 | <a href="#">c2fuqA_</a> | Alignment | not modelled | 47.1 | 5  | <b>PDB header:</b> sugar binding protein<br><b>Chain:</b> A: <b>PDB Molecule:</b> heparinase ii protein;<br><b>PDBTitle:</b> crystal structure of heparinase ii                                                                                                    |
| 72 | <a href="#">c2v8kA_</a> | Alignment | not modelled | 35.0 | 21 | <b>PDB header:</b> lyase<br><b>Chain:</b> A: <b>PDB Molecule:</b> pectate lyase;<br><b>PDBTitle:</b> structure of a family 2 pectate lyase in complex with2 trigalacturonic acid                                                                                   |
| 73 | <a href="#">c2ee2A_</a> | Alignment | not modelled | 34.5 | 14 | <b>PDB header:</b> signaling protein<br><b>Chain:</b> A: <b>PDB Molecule:</b> contactin-1;<br><b>PDBTitle:</b> solution structures of the fn3 domain of human contactin 1                                                                                          |
| 74 | <a href="#">c3cihA_</a> | Alignment | not modelled | 31.7 | 11 | <b>PDB header:</b> hydrolase<br><b>Chain:</b> A: <b>PDB Molecule:</b> putative alpha-rhamnosidase;<br><b>PDBTitle:</b> crystal structure of a putative alpha-rhamnosidase from2 bacteroides thetaiotaomicron                                                       |
| 75 | <a href="#">d1qaza_</a> | Alignment | not modelled | 31.6 | 13 | <b>Fold:</b> alpha/alpha toroid<br><b>Superfamily:</b> Chondroitin AC/alginate lyase<br><b>Family:</b> Alginate lyase A1-III                                                                                                                                       |
| 76 | <a href="#">d2dn7a1</a> | Alignment | not modelled | 30.8 | 14 | <b>Fold:</b> Immunoglobulin-like beta-sandwich<br><b>Superfamily:</b> Fibronectin type III<br><b>Family:</b> Fibronectin type III                                                                                                                                  |
| 77 | <a href="#">d1q38a_</a> | Alignment | not modelled | 23.7 | 10 | <b>Fold:</b> Immunoglobulin-like beta-sandwich<br><b>Superfamily:</b> Fibronectin type III<br><b>Family:</b> Fibronectin type III                                                                                                                                  |
| 78 | <a href="#">c2rttA_</a> | Alignment | not modelled | 19.9 | 22 | <b>PDB header:</b> hydrolase<br><b>Chain:</b> A: <b>PDB Molecule:</b> chic;<br><b>PDBTitle:</b> solution structure of the chitin-binding domain of chi18ac                                                                                                         |

|    |                         |           |              |      |    |                                                                                                                                                                                                                                                                     |
|----|-------------------------|-----------|--------------|------|----|---------------------------------------------------------------------------------------------------------------------------------------------------------------------------------------------------------------------------------------------------------------------|
|    |                         |           |              |      |    | from2 streptomyces coelicolor                                                                                                                                                                                                                                       |
| 79 | <a href="#">c1o79A_</a> | Alignment | not modelled | 19.3 | 12 | <b>PDB header:</b> isomerase<br><b>Chain:</b> A: <b>PDB Molecule:</b> squalene--hopene cyclase;<br><b>PDBTitle:</b> structures of human oxidosqualene cyclase inhibitors bound2 to a homologous enzyme                                                              |
| 80 | <a href="#">c2dbjA_</a> | Alignment | not modelled | 19.2 | 11 | <b>PDB header:</b> transferase, signaling protein<br><b>Chain:</b> A: <b>PDB Molecule:</b> proto-oncogene tyrosine-protein kinase mer<br><b>PDBTitle:</b> solution structures of the fn3 domain of human proto-2 oncogene tyrosine-protein kinase mer precursor     |
| 81 | <a href="#">c4mcjC_</a> | Alignment | not modelled | 17.1 | 27 | <b>PDB header:</b> transferase<br><b>Chain:</b> C: <b>PDB Molecule:</b> uncharacterized protein;<br><b>PDBTitle:</b> crystal structure of a putative nucleoside deoxyribosyltransferase2 (bdi_0649) from parabacteroides distasonis atcc 8503 at 2.40 a3 resolution |
| 82 | <a href="#">c2kbgA_</a> | Alignment | not modelled | 17.1 | 14 | <b>PDB header:</b> cell adhesion<br><b>Chain:</b> A: <b>PDB Molecule:</b> neural cell adhesion molecule 2;<br><b>PDBTitle:</b> solution structure of the second fibronectin type-iii module2 of ncam2                                                               |
| 83 | <a href="#">d1f53a_</a> | Alignment | not modelled | 17.0 | 64 | <b>Fold:</b> gamma-Crystallin-like<br><b>Superfamily:</b> gamma-Crystallin-like<br><b>Family:</b> Killer toxin-like protein SKLP                                                                                                                                    |
| 84 | <a href="#">d1vzsa_</a> | Alignment | not modelled | 16.3 | 18 | <b>Fold:</b> Mitochondrial ATP synthase coupling factor 6<br><b>Superfamily:</b> Mitochondrial ATP synthase coupling factor 6<br><b>Family:</b> Mitochondrial ATP synthase coupling factor 6                                                                        |
| 85 | <a href="#">c5bp8A_</a> | Alignment | not modelled | 15.6 | 16 | <b>PDB header:</b> isomerase<br><b>Chain:</b> A: <b>PDB Molecule:</b> ent-copalyl diphosphate synthase;<br><b>PDBTitle:</b> ent-copalyl diphosphate synthase from streptomyces platensis                                                                            |
| 86 | <a href="#">c3a0oB_</a> | Alignment | not modelled | 15.2 | 11 | <b>PDB header:</b> lyase<br><b>Chain:</b> B: <b>PDB Molecule:</b> oligo alginate lyase;<br><b>PDBTitle:</b> crystal structure of alginate lyase from agrobacterium tumefaciens c58                                                                                  |
| 87 | <a href="#">c3teuA_</a> | Alignment | not modelled | 13.0 | 14 | <b>PDB header:</b> de novo protein<br><b>Chain:</b> A: <b>PDB Molecule:</b> fibcon;<br><b>PDBTitle:</b> crystal structure of fibcon                                                                                                                                 |
| 88 | <a href="#">d3csba1</a> | Alignment | not modelled | 12.1 | 11 | <b>Fold:</b> Immunoglobulin-like beta-sandwich<br><b>Superfamily:</b> Fibronectin type III<br><b>Family:</b> Fibronectin type III                                                                                                                                   |
| 89 | <a href="#">d1g4ma2</a> | Alignment | not modelled | 11.8 | 18 | <b>Fold:</b> Immunoglobulin-like beta-sandwich<br><b>Superfamily:</b> E set domains<br><b>Family:</b> Arrestin/Vps26-like                                                                                                                                           |
| 90 | <a href="#">d2g0da1</a> | Alignment | not modelled | 11.7 | 13 | <b>Fold:</b> alpha/alpha toroid<br><b>Superfamily:</b> LanC-like<br><b>Family:</b> LanC-like                                                                                                                                                                        |
| 91 | <a href="#">c4lsdF_</a> | Alignment | not modelled | 11.5 | 11 | <b>PDB header:</b> hormone<br><b>Chain:</b> F: <b>PDB Molecule:</b> fibronectin type iii domain-containing protein 5;<br><b>PDBTitle:</b> myokine structure                                                                                                         |
| 92 | <a href="#">c3q7aB_</a> | Alignment | not modelled | 10.7 | 13 | <b>PDB header:</b> transferase/transferase inhibitor<br><b>Chain:</b> B: <b>PDB Molecule:</b> farnesyltransferase beta subunit;<br><b>PDBTitle:</b> cryptococcus neoformans protein farnesyltransferase in complex with2 fpp and I-778,123                          |
| 93 | <a href="#">d2crza1</a> | Alignment | not modelled | 10.7 | 10 | <b>Fold:</b> Immunoglobulin-like beta-sandwich<br><b>Superfamily:</b> Fibronectin type III<br><b>Family:</b> Fibronectin type III                                                                                                                                   |
| 94 | <a href="#">d1qg3a1</a> | Alignment | not modelled | 10.5 | 16 | <b>Fold:</b> Immunoglobulin-like beta-sandwich<br><b>Superfamily:</b> Fibronectin type III<br><b>Family:</b> Fibronectin type III                                                                                                                                   |
| 95 | <a href="#">d1pjwa_</a> | Alignment | not modelled | 10.5 | 33 | <b>Fold:</b> Immunoglobulin-like beta-sandwich<br><b>Superfamily:</b> E set domains<br><b>Family:</b> Class II viral fusion proteins C-terminal domain                                                                                                              |
| 96 | <a href="#">d2clyc1</a> | Alignment | not modelled | 10.3 | 17 | <b>Fold:</b> Mitochondrial ATP synthase coupling factor 6<br><b>Superfamily:</b> Mitochondrial ATP synthase coupling factor 6<br><b>Family:</b> Mitochondrial ATP synthase coupling factor 6                                                                        |
| 97 | <a href="#">d1fnha1</a> | Alignment | not modelled | 10.1 | 20 | <b>Fold:</b> Immunoglobulin-like beta-sandwich<br><b>Superfamily:</b> Fibronectin type III<br><b>Family:</b> Fibronectin type III                                                                                                                                   |
| 98 | <a href="#">c4ozwA_</a> | Alignment | not modelled | 10.0 | 13 | <b>PDB header:</b> lyase<br><b>Chain:</b> A: <b>PDB Molecule:</b> alginate lyase;<br><b>PDBTitle:</b> crystal structure of the periplasmic alginate lyase algI h202a mutant                                                                                         |
| 99 | <a href="#">c3nfvA_</a> | Alignment | not modelled | 9.7  | 15 | <b>PDB header:</b> lyase<br><b>Chain:</b> A: <b>PDB Molecule:</b> alginate lyase;<br><b>PDBTitle:</b> crystal structure of an alginate lyase (bacova_01668) from bacteroides2 ovatus at 1.95 a resolution                                                           |

# Phyre2

|               |                              |
|---------------|------------------------------|
| Email         | siddhartha_kundu@yahoo.co.in |
| Description   | Q9ZSP9__                     |
| Date          | Sat Aug 15 22:35:40 BST 2015 |
| Unique Job ID | f8bd735ab827e260             |

Detailed template information

| #  | Template                | Alignment Coverage                                                                            | 3D Model                                                                            | Confidence | % i.d. | Template Information                                                                                                                                                                                                                                         |
|----|-------------------------|-----------------------------------------------------------------------------------------------|-------------------------------------------------------------------------------------|------------|--------|--------------------------------------------------------------------------------------------------------------------------------------------------------------------------------------------------------------------------------------------------------------|
| 1  | <a href="#">c1ga2A_</a> | 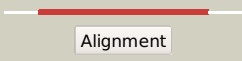 Alignment   |    | 100.0      | 32     | <b>PDB header:</b> hydrolase<br><b>Chain:</b> A: <b>PDB Molecule:</b> endooglucanase 9g;<br><b>PDBTitle:</b> the crystal structure of endoglucanase 9g from clostridium2 cellulolyticum complexed with cellobiose                                            |
| 2  | <a href="#">c1js4B_</a> |  Alignment   |    | 100.0      | 38     | <b>PDB header:</b> glycosyl hydrolase<br><b>Chain:</b> B: <b>PDB Molecule:</b> endo/exocellulase e4;<br><b>PDBTitle:</b> endo/exocellulase:cellobiose from thermomonospora                                                                                   |
| 3  | <a href="#">d1g87a1</a> |  Alignment   |    | 100.0      | 37     | <b>Fold:</b> alpha/alpha toroid<br><b>Superfamily:</b> Six-hairpin glycosidases<br><b>Family:</b> Cellulases catalytic domain                                                                                                                                |
| 4  | <a href="#">c2yikA_</a> |  Alignment   |    | 100.0      | 32     | <b>PDB header:</b> hydrolase<br><b>Chain:</b> A: <b>PDB Molecule:</b> endooglucanase;<br><b>PDBTitle:</b> catalytic domain of clostridium thermocellum cellt                                                                                                 |
| 5  | <a href="#">d1tf4a1</a> |  Alignment |  | 100.0      | 43     | <b>Fold:</b> alpha/alpha toroid<br><b>Superfamily:</b> Six-hairpin glycosidases<br><b>Family:</b> Cellulases catalytic domain                                                                                                                                |
| 6  | <a href="#">c2xfgA_</a> |  Alignment |  | 100.0      | 41     | <b>PDB header:</b> hydrolase/sugar binding protein<br><b>Chain:</b> A: <b>PDB Molecule:</b> endooglucanase 1;<br><b>PDBTitle:</b> reassembly and co-crystallization of a family 9 processive2 endoglucanase from separately expressed gh9 and cbm3c3 modules |
| 7  | <a href="#">c3wc3A_</a> |  Alignment |  | 100.0      | 45     | <b>PDB header:</b> hydrolase<br><b>Chain:</b> A: <b>PDB Molecule:</b> endo-1, 4-beta-glucanase;<br><b>PDBTitle:</b> crystal structure of endo-1,4-beta-glucanase from eisenia fetida                                                                         |
| 8  | <a href="#">d1ia6a_</a> |  Alignment |  | 100.0      | 35     | <b>Fold:</b> alpha/alpha toroid<br><b>Superfamily:</b> Six-hairpin glycosidases<br><b>Family:</b> Cellulases catalytic domain                                                                                                                                |
| 9  | <a href="#">d1ks8a_</a> |  Alignment |  | 100.0      | 47     | <b>Fold:</b> alpha/alpha toroid<br><b>Superfamily:</b> Six-hairpin glycosidases<br><b>Family:</b> Cellulases catalytic domain                                                                                                                                |
| 10 | <a href="#">d1ut9a1</a> |  Alignment |  | 100.0      | 20     | <b>Fold:</b> alpha/alpha toroid<br><b>Superfamily:</b> Six-hairpin glycosidases<br><b>Family:</b> Cellulases catalytic domain                                                                                                                                |
| 11 | <a href="#">c3gzkA_</a> |  Alignment |  | 100.0      | 21     | <b>PDB header:</b> hydrolase<br><b>Chain:</b> A: <b>PDB Molecule:</b> cellulase;<br><b>PDBTitle:</b> structure of a. acidocaldarius cellulase cela                                                                                                           |



|    |                         |           |                                                                                     |       |    |                                                                                                                                                                                                                                                                                                         |
|----|-------------------------|-----------|-------------------------------------------------------------------------------------|-------|----|---------------------------------------------------------------------------------------------------------------------------------------------------------------------------------------------------------------------------------------------------------------------------------------------------------|
| 12 | <a href="#">c1ut9A_</a> | Alignment | 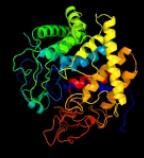    | 100.0 | 21 | <b>PDB header:</b> hydrolase<br><b>Chain:</b> A: <b>PDB Molecule:</b> cellulose 1,4-beta-cellobiosidase;<br><b>PDBTitle:</b> structural basis for the exocellulase activity of the2 cellobiohydrolase cbha from c. thermocellum                                                                         |
| 13 | <a href="#">d1clca1</a> | Alignment |    | 100.0 | 21 | <b>Fold:</b> alpha/alpha toroid<br><b>Superfamily:</b> Six-hairpin glycosidases<br><b>Family:</b> Cellulases catalytic domain                                                                                                                                                                           |
| 14 | <a href="#">c1clcA_</a> | Alignment |    | 100.0 | 21 | <b>PDB header:</b> glycosyl hydrolase<br><b>Chain:</b> A: <b>PDB Molecule:</b> endoglucanase celd; ec: 3.2.1.4;<br><b>PDBTitle:</b> three-dimensional structure of endoglucanase d at 1.92 angstroms resolution                                                                                         |
| 15 | <a href="#">c3x17B_</a> | Alignment |    | 100.0 | 23 | <b>PDB header:</b> hydrolase<br><b>Chain:</b> B: <b>PDB Molecule:</b> endoglucanase;<br><b>PDBTitle:</b> crystal structure of metagenome-derived glycoside hydrolase family 92 endoglucanase                                                                                                            |
| 16 | <a href="#">c3h71C_</a> | Alignment |    | 100.0 | 18 | <b>PDB header:</b> hydrolase<br><b>Chain:</b> C: <b>PDB Molecule:</b> endoglucanase;<br><b>PDBTitle:</b> crystal structure of endoglucanase-related protein from vibrio2 paraahaemolyticus                                                                                                              |
| 17 | <a href="#">c2xfgB_</a> | Alignment |   | 99.8  | 17 | <b>PDB header:</b> hydrolase/sugar binding protein<br><b>Chain:</b> B: <b>PDB Molecule:</b> endoglucanase 1;<br><b>PDBTitle:</b> reassembly and co-crystallization of a family 9 processive2 endoglucanase from separately expressed gh9 and cbm3c3 modules                                             |
| 18 | <a href="#">d1tf4a2</a> | Alignment |  | 99.5  | 14 | <b>Fold:</b> Common fold of diphtheria toxin/transcription factors/cytochrome f<br><b>Superfamily:</b> Carbohydrate-binding domain<br><b>Family:</b> Cellulose-binding domain family III                                                                                                                |
| 19 | <a href="#">d1g87a2</a> | Alignment |  | 99.5  | 11 | <b>Fold:</b> Common fold of diphtheria toxin/transcription factors/cytochrome f<br><b>Superfamily:</b> Carbohydrate-binding domain<br><b>Family:</b> Cellulose-binding domain family III                                                                                                                |
| 20 | <a href="#">c4b9pA_</a> | Alignment |  | 98.9  | 14 | <b>PDB header:</b> carbohydrate-binding protein<br><b>Chain:</b> A: <b>PDB Molecule:</b> type 3a cellulose-binding domain protein;<br><b>PDBTitle:</b> biomass sensing module from putative rsgi2 protein of2 clostridium thermocellum resemble family 3 carbohydrate-3 binding module of cellulosome   |
| 21 | <a href="#">d1nbca_</a> | Alignment | not modelled                                                                        | 98.9  | 12 | <b>Fold:</b> Common fold of diphtheria toxin/transcription factors/cytochrome f<br><b>Superfamily:</b> Carbohydrate-binding domain<br><b>Family:</b> Cellulose-binding domain family III                                                                                                                |
| 22 | <a href="#">d1g43a_</a> | Alignment | not modelled                                                                        | 98.8  | 17 | <b>Fold:</b> Common fold of diphtheria toxin/transcription factors/cytochrome f<br><b>Superfamily:</b> Carbohydrate-binding domain<br><b>Family:</b> Cellulose-binding domain family III                                                                                                                |
| 23 | <a href="#">c2wo4A_</a> | Alignment | not modelled                                                                        | 98.8  | 14 | <b>PDB header:</b> hydrolase<br><b>Chain:</b> A: <b>PDB Molecule:</b> glycoside hydrolase, family 9;<br><b>PDBTitle:</b> 3b' carbohydrate-binding module from the cel9v glycoside2 hydrolase from clostridium thermocellum, in-house data                                                               |
| 24 | <a href="#">c2l8aA_</a> | Alignment | not modelled                                                                        | 98.8  | 11 | <b>PDB header:</b> hydrolase<br><b>Chain:</b> A: <b>PDB Molecule:</b> endoglucanase;<br><b>PDBTitle:</b> structure of a novel cbm3 lacking the calcium-binding site                                                                                                                                     |
| 25 | <a href="#">c4v1sA_</a> | Alignment | not modelled                                                                        | 98.7  | 9  | <b>PDB header:</b> hydrolase<br><b>Chain:</b> A: <b>PDB Molecule:</b> alpha-1,6-mannanase;<br><b>PDBTitle:</b> structure of the gh76 alpha-mannanase bt2949 from2 bacteroides thetaiotaomicron                                                                                                          |
| 26 | <a href="#">c4b97A_</a> | Alignment | not modelled                                                                        | 98.7  | 11 | <b>PDB header:</b> sugar binding protein<br><b>Chain:</b> A: <b>PDB Molecule:</b> cellulose binding domain-containing protein;<br><b>PDBTitle:</b> biomass sensing modules from putative rsgi-like proteins2 of clostridium thermocellum resemble family 3 carbohydrate-3 binding module of cellulosome |
| 27 | <a href="#">c3zqwA_</a> | Alignment | not modelled                                                                        | 98.7  | 14 | <b>PDB header:</b> carbohydrate-binding protein<br><b>Chain:</b> A: <b>PDB Molecule:</b> cellulosomal scaffoldin;<br><b>PDBTitle:</b> structure of cbm3b of major scaffoldin subunit scaa from2 acetivibrio cellulolyticus                                                                              |
|    |                         |           |                                                                                     |       |    | <b>PDB header:</b> sugar binding protein<br><b>Chain:</b> A: <b>PDB Molecule:</b> cellulosomal scaffoldin;                                                                                                                                                                                              |

|    |                         |           |              |      |    |                                                                                                                                                                                                                                                                                                                                                                                                              |
|----|-------------------------|-----------|--------------|------|----|--------------------------------------------------------------------------------------------------------------------------------------------------------------------------------------------------------------------------------------------------------------------------------------------------------------------------------------------------------------------------------------------------------------|
| 28 | <a href="#">c2xbtA_</a> | Alignment | not modelled | 98.5 | 11 | <b>PDBTitle:</b> structure of a scaffoldin carbohydrate-binding module family 3b from2 the cellulosome of bacteroides cellulosolvans: structural diversity3 and implications for carbohydrate binding<br><b>PDB header:</b> hydrolase                                                                                                                                                                        |
| 29 | <a href="#">c4qk0C_</a> | Alignment | not modelled | 98.3 | 16 | <b>Chain:</b> C: <b>PDB Molecule:</b> gh127 beta-l-arabinofuranoside;<br><b>PDBTitle:</b> crystal structure of ara127n-se, a gh127 beta-l-arabinofuranosidase2 from geobacillus stearothermophilus t6<br><b>PDB header:</b> sugar binding protein                                                                                                                                                            |
| 30 | <a href="#">c4b96A_</a> | Alignment | not modelled | 98.3 | 11 | <b>Chain:</b> A: <b>PDB Molecule:</b> cellulose binding domain-containing protein;<br><b>PDBTitle:</b> family 3b carbohydrate-binding module from the biomass2 sensing system of clostridium clariflavum<br><b>PDB header:</b> hydrolase                                                                                                                                                                     |
| 31 | <a href="#">c4c1sA_</a> | Alignment | not modelled | 98.3 | 13 | <b>Chain:</b> A: <b>PDB Molecule:</b> glycoside hydrolase family 76 mannosidase;<br><b>PDBTitle:</b> glycoside hydrolase family 76 (mannosidase) bt3792 from2 bacteroides thetaiotaomicron vpi-5482<br><b>PDB header:</b> isomerase                                                                                                                                                                          |
| 32 | <a href="#">c3wkgA_</a> | Alignment | not modelled | 98.2 | 14 | <b>Chain:</b> A: <b>PDB Molecule:</b> cellobiose 2-epimerase;<br><b>PDBTitle:</b> crystal structure of cellobiose 2-epimerase in complex with2 glucosylmannose<br><b>PDB header:</b> hydrolase                                                                                                                                                                                                               |
| 33 | <a href="#">c2yIkD_</a> | Alignment | not modelled | 98.2 | 8  | <b>Chain:</b> D: <b>PDB Molecule:</b> cellulose 1,4-beta-cellobiosidase;<br><b>PDBTitle:</b> carbohydrate-binding module cbm3b from the cellulosomal2 cellobiohydrolase 9a from clostridium thermocellum<br><b>PDB header:</b> isomerase                                                                                                                                                                     |
| 34 | <a href="#">c3vw5B_</a> | Alignment | not modelled | 98.2 | 19 | <b>Chain:</b> B: <b>PDB Molecule:</b> cellobiose 2-epimerase;<br><b>PDBTitle:</b> crystal structure of sugar epimerase from ruminal bacterium<br><b>PDB header:</b> hydrolase                                                                                                                                                                                                                                |
| 35 | <a href="#">c3wKxA_</a> | Alignment | not modelled | 98.2 | 18 | <b>Chain:</b> A: <b>PDB Molecule:</b> non-reducing end beta-l-arabinofuranosidase;<br><b>PDBTitle:</b> crystal structure of gh127 beta-l-arabinofuranosidase hypba1 from2 bifidobacterium longum arabinose complex form<br><b>PDB header:</b> carbohydrate-binding protein                                                                                                                                   |
| 36 | <a href="#">c4b9cA_</a> | Alignment | not modelled | 98.2 | 8  | <b>Chain:</b> A: <b>PDB Molecule:</b> type 3a cellulose-binding domain protein;<br><b>PDBTitle:</b> biomass sensing modules from putative rsgI-like proteins2 of clostridium thermocellum resemble family 3 carbohydrate-3 binding module of cellulosome<br><b>PDB header:</b> structural genomics, unknown function                                                                                         |
| 37 | <a href="#">c3k7xA_</a> | Alignment | not modelled | 98.1 | 15 | <b>Chain:</b> A: <b>PDB Molecule:</b> lin0763 protein;<br><b>PDBTitle:</b> crystal structure of the lin0763 protein from listeria2 innocua. northeast structural genomics consortium target3 lkr23.<br><b>PDB header:</b> hydrolase                                                                                                                                                                          |
| 38 | <a href="#">c4bojC_</a> | Alignment | not modelled | 97.9 | 17 | <b>Chain:</b> C: <b>PDB Molecule:</b> alpha-1,6-mannanase;<br><b>PDBTitle:</b> crystal structure of bacillus circulans tn-31 aman6 in2 complex with mannobiose<br><b>PDB header:</b> isomerase                                                                                                                                                                                                               |
| 39 | <a href="#">c3gt5A_</a> | Alignment | not modelled | 97.4 | 15 | <b>Chain:</b> A: <b>PDB Molecule:</b> n-acetylglucosamine 2-epimerase;<br><b>PDBTitle:</b> crystal structure of an n-acetylglucosamine 2-epimerase family protein2 from xylella fastidiosa<br><b>PDB header:</b> hydrolase                                                                                                                                                                                   |
| 40 | <a href="#">c4mu9B_</a> | Alignment | not modelled | 97.3 | 17 | <b>Chain:</b> B: <b>PDB Molecule:</b> glycoside hydrolase family 73;<br><b>PDBTitle:</b> crystal structure of a putative glycosylhydrolase (bt_3782) from2 bacteroides thetaiotaomicron vpi-5482 at 1.89 a resolution<br><b>Fold:</b> alpha/alpha toroid<br><b>Superfamily:</b> Six-hairpin glycosidases<br><b>Family:</b> Hypothetical protein YteR                                                         |
| 41 | <a href="#">d1nc5a_</a> | Alignment | not modelled | 96.8 | 14 | <b>PDB header:</b> hydrolase<br><b>Chain:</b> B: <b>PDB Molecule:</b> glycoside hydrolase family 105 protein;<br><b>PDBTitle:</b> crystal structure of a glycoside hydrolase family 105 (gh105) enzyme2 from thielavia terrestris<br><b>PDB header:</b> hydrolase                                                                                                                                            |
| 42 | <a href="#">c4xuvB_</a> | Alignment | not modelled | 96.8 | 11 | <b>Chain:</b> B: <b>PDB Molecule:</b> similar to yter (bacilus subtilis);<br><b>PDBTitle:</b> structural analysis of c. acetobutylicum atcc 824 glycoside hydrolase2 from family 105<br><b>Fold:</b> alpha/alpha toroid<br><b>Superfamily:</b> Six-hairpin glycosidases<br><b>Family:</b> N-acylglucosamine (NAG) epimerase                                                                                  |
| 43 | <a href="#">c4wu0B_</a> | Alignment | not modelled | 96.4 | 16 | <b>PDB header:</b> hydrolase<br><b>Chain:</b> B: <b>PDB Molecule:</b> unsaturated 3s-rhamnoglycuronyl hydrolase;<br><b>PDBTitle:</b> crystal structure of a novel unsaturated beta-glucuronyl2 hydrolase enzyme, belonging to family gh105, involved in3 ulvan degradation<br><b>PDB header:</b> hydrolase                                                                                                   |
| 44 | <a href="#">d2afaa1</a> | Alignment | not modelled | 96.4 | 10 | <b>Chain:</b> A: <b>PDB Molecule:</b> putative cytoplasmic protein;<br><b>PDBTitle:</b> the crystal structure of a possible member of gh105 family from2 klebsiella pneumoniae subsp. pneumoniae mgh 78578<br><b>PDB header:</b> hydrolase                                                                                                                                                                   |
| 45 | <a href="#">c3pmmA_</a> | Alignment | not modelled | 95.6 | 9  | <b>Chain:</b> B: <b>PDB Molecule:</b> putative glycosyl hydrolase;<br><b>PDBTitle:</b> crystal structure of putative glycosyl hydrolase (np_813087.1) from2 bacteroides thetaiotaomicron vpi-5482 at 1.80 a resolution<br><b>PDB header:</b> isomerase                                                                                                                                                       |
| 46 | <a href="#">c4ce7B_</a> | Alignment | not modelled | 95.6 | 15 | <b>Chain:</b> B: <b>PDB Molecule:</b> n-acetyl-d-glucosamine 2-epimerase;<br><b>PDBTitle:</b> crystal structure of anabaena sp. ch1 n-acetyl-d-glucosamine 2-2 epimerase at 2.0 a<br><b>Fold:</b> Common fold of diphtheria toxin/transcription factors/cytochrome f<br><b>Superfamily:</b> Carbohydrate-binding domain<br><b>Family:</b> Cellulose-binding domain family II<br><b>PDB header:</b> hydrolase |
| 47 | <a href="#">c3k11A_</a> | Alignment | not modelled | 95.1 | 14 | <b>Chain:</b> G: <b>PDB Molecule:</b> endoglucanase d;<br><b>PDBTitle:</b> the structure of the catalytic and carbohydrate binding domain of2 endoglucanase d from clostridium cellulovorans<br><b>PDB header:</b> hydrolase                                                                                                                                                                                 |
| 48 | <a href="#">c2gz6B_</a> | Alignment | not modelled | 92.7 | 10 | <b>Chain:</b> A: <b>PDB Molecule:</b> unsaturated glucuronyl hydrolase;<br><b>PDBTitle:</b> crystal structure of unsaturated glucuronyl hydrolase from2 streptococcus agalactiae<br><b>PDB header:</b> hydrolase                                                                                                                                                                                             |
| 49 | <a href="#">d1exha_</a> | Alignment | not modelled | 92.6 | 23 | <b>PDB header:</b> hydrolase                                                                                                                                                                                                                                                                                                                                                                                 |
| 50 | <a href="#">c3ndyG_</a> | Alignment | not modelled | 92.4 | 16 | <b>Chain:</b> G: <b>PDB Molecule:</b> endoglucanase d;<br><b>PDBTitle:</b> the structure of the catalytic and carbohydrate binding domain of2 endoglucanase d from clostridium cellulovorans<br><b>PDB header:</b> hydrolase                                                                                                                                                                                 |
| 51 | <a href="#">c2zzrA_</a> | Alignment | not modelled | 92.1 | 17 | <b>Chain:</b> A: <b>PDB Molecule:</b> unsaturated glucuronyl hydrolase;<br><b>PDBTitle:</b> crystal structure of unsaturated glucuronyl hydrolase from2 streptococcus agalactiae<br><b>PDB header:</b> hydrolase                                                                                                                                                                                             |

|    |                         |           |              |      |    |                                                                                                                                                                                                                                                                                |
|----|-------------------------|-----------|--------------|------|----|--------------------------------------------------------------------------------------------------------------------------------------------------------------------------------------------------------------------------------------------------------------------------------|
| 52 | <a href="#">c3wiwA</a>  | Alignment | not modelled | 90.2 | 13 | <b>Chain:</b> A: <b>PDB Molecule:</b> glycosyl hydrolase family 88;<br><b>PDBTitle:</b> crystal structure of unsaturated glucuronyl hydrolase specific for2 heparin                                                                                                            |
| 53 | <a href="#">d1fp3a</a>  | Alignment | not modelled | 89.5 | 16 | <b>Fold:</b> alpha/alpha toroid<br><b>Superfamily:</b> Six-hairpin glycosidases<br><b>Family:</b> N-acylglucosamine (NAG) epimerase                                                                                                                                            |
| 54 | <a href="#">c4q88B</a>  | Alignment | not modelled | 89.0 | 8  | <b>PDB header:</b> structural genomics, unknown function<br><b>Chain:</b> B: <b>PDB Molecule:</b> uncharacterized protein;<br><b>PDBTitle:</b> glycosyl hydrolase family 88 from bacteroides vulgatus                                                                          |
| 55 | <a href="#">d2d5ja1</a> | Alignment | not modelled | 87.9 | 14 | <b>Fold:</b> alpha/alpha toroid<br><b>Superfamily:</b> Six-hairpin glycosidases<br><b>Family:</b> Glycosyl Hydrolase Family 88                                                                                                                                                 |
| 56 | <a href="#">c2rttA</a>  | Alignment | not modelled | 87.2 | 22 | <b>PDB header:</b> hydrolase<br><b>Chain:</b> A: <b>PDB Molecule:</b> chic;<br><b>PDBTitle:</b> solution structure of the chitin-binding domain of chi18ac from2 streptomyces coelicolor                                                                                       |
| 57 | <a href="#">c1w6kA</a>  | Alignment | not modelled | 86.7 | 10 | <b>PDB header:</b> isomerase<br><b>Chain:</b> A: <b>PDB Molecule:</b> lanosterol synthase;<br><b>PDBTitle:</b> structure of human osc in complex with lanosterol                                                                                                               |
| 58 | <a href="#">d1gxma</a>  | Alignment | not modelled | 85.7 | 26 | <b>Fold:</b> alpha/alpha toroid<br><b>Superfamily:</b> Family 10 polysaccharide lyase<br><b>Family:</b> Family 10 polysaccharide lyase                                                                                                                                         |
| 59 | <a href="#">c3e6uA</a>  | Alignment | not modelled | 79.3 | 18 | <b>PDB header:</b> signaling protein<br><b>Chain:</b> A: <b>PDB Molecule:</b> lancl-like protein 1;<br><b>PDBTitle:</b> crystal structure of human lancl1                                                                                                                      |
| 60 | <a href="#">c5a29A</a>  | Alignment | not modelled | 79.2 | 29 | <b>PDB header:</b> lyase<br><b>Chain:</b> A: <b>PDB Molecule:</b> exopolysaccharonate lyase;<br><b>PDBTitle:</b> family 2 pectate lyase from vibrio vulnificus                                                                                                                 |
| 61 | <a href="#">c4pw2A</a>  | Alignment | not modelled | 71.4 | 19 | <b>PDB header:</b> isomerase<br><b>Chain:</b> A: <b>PDB Molecule:</b> d-glucuronyl c5 epimerase b;<br><b>PDBTitle:</b> crystal structure of d-glucuronyl c5 epimerase                                                                                                          |
| 62 | <a href="#">c3cihA</a>  | Alignment | not modelled | 60.1 | 11 | <b>PDB header:</b> hydrolase<br><b>Chain:</b> A: <b>PDB Molecule:</b> putative alpha-rhamnosidase;<br><b>PDBTitle:</b> crystal structure of a putative alpha-rhamnosidase from2 bacteroides thetaiotaomicron                                                                   |
| 63 | <a href="#">d1hcua</a>  | Alignment | not modelled | 55.8 | 14 | <b>Fold:</b> alpha/alpha toroid<br><b>Superfamily:</b> Seven-hairpin glycosidases<br><b>Family:</b> Class I alpha-1,2-mannosidase, catalytic domain                                                                                                                            |
| 64 | <a href="#">c2v8kA</a>  | Alignment | not modelled | 50.6 | 20 | <b>PDB header:</b> lyase<br><b>Chain:</b> A: <b>PDB Molecule:</b> pectate lyase;<br><b>PDBTitle:</b> structure of a family 2 pectate lyase in complex with2 trigalacturonic acid                                                                                               |
| 65 | <a href="#">d1qaza</a>  | Alignment | not modelled | 47.9 | 12 | <b>Fold:</b> alpha/alpha toroid<br><b>Superfamily:</b> Chondroitin AC/alginate lyase<br><b>Family:</b> Alginate lyase A1-III                                                                                                                                                   |
| 66 | <a href="#">c2kmgA</a>  | Alignment | not modelled | 45.1 | 22 | <b>PDB header:</b> gene regulation<br><b>Chain:</b> A: <b>PDB Molecule:</b> klca;<br><b>PDBTitle:</b> the structure of the klca and ardb proteins show a novel2 fold and antirestriction activity against type i dna3 restriction systems in vivo but not in vitro             |
| 67 | <a href="#">d1d12a</a>  | Alignment | not modelled | 43.8 | 14 | <b>Fold:</b> alpha/alpha toroid<br><b>Superfamily:</b> Seven-hairpin glycosidases<br><b>Family:</b> Class I alpha-1,2-mannosidase, catalytic domain                                                                                                                            |
| 68 | <a href="#">c4ayqA</a>  | Alignment | not modelled | 41.7 | 10 | <b>PDB header:</b> hydrolase<br><b>Chain:</b> A: <b>PDB Molecule:</b> mannosyl-oligosaccharide 1,2-alpha-mannosidase;<br><b>PDBTitle:</b> structure of the gh47 processing alpha-1,2-mannosidase from2 caulobacter strain k31 in complex with mannoimidazole                   |
| 69 | <a href="#">c1g6iA</a>  | Alignment | not modelled | 40.8 | 14 | <b>PDB header:</b> hydrolase<br><b>Chain:</b> A: <b>PDB Molecule:</b> class i alpha-1,2-mannosidase;<br><b>PDBTitle:</b> crystal structure of the yeast alpha-1,2-mannosidase with bound 1-2 deoxymannojirimycin at 1.59 a resolution                                          |
| 70 | <a href="#">c4zwiA</a>  | Alignment | not modelled | 34.9 | 17 | <b>PDB header:</b> signaling protein<br><b>Chain:</b> A: <b>PDB Molecule:</b> chimera protein of human rhodopsin, mouse s-arrestin, and<br><b>PDBTitle:</b> crystal structure of rhodopsin bound to arrestin by femtosecond x-ray2 laser                                       |
| 71 | <a href="#">c2fuqA</a>  | Alignment | not modelled | 34.4 | 5  | <b>PDB header:</b> sugar binding protein<br><b>Chain:</b> A: <b>PDB Molecule:</b> heparinase ii protein;<br><b>PDBTitle:</b> crystal structure of heparinase ii                                                                                                                |
| 72 | <a href="#">c1krfA</a>  | Alignment | not modelled | 32.7 | 11 | <b>PDB header:</b> hydrolase<br><b>Chain:</b> A: <b>PDB Molecule:</b> mannosyl-oligosaccharide alpha-1,2-mannosidase;<br><b>PDBTitle:</b> structure of p. citrinum alpha 1,2-mannosidase reveals the basis for2 differences in specificity of the er and golgi class i enzymes |
| 73 | <a href="#">d2ri9a1</a> | Alignment | not modelled | 32.7 | 11 | <b>Fold:</b> alpha/alpha toroid<br><b>Superfamily:</b> Seven-hairpin glycosidases<br><b>Family:</b> Class I alpha-1,2-mannosidase, catalytic domain                                                                                                                            |
| 74 | <a href="#">d1nxca</a>  | Alignment | not modelled | 31.3 | 10 | <b>Fold:</b> alpha/alpha toroid<br><b>Superfamily:</b> Seven-hairpin glycosidases<br><b>Family:</b> Class I alpha-1,2-mannosidase, catalytic domain                                                                                                                            |
| 75 | <a href="#">c4ok2A</a>  | Alignment | not modelled | 30.1 | 17 | <b>PDB header:</b> lyase<br><b>Chain:</b> A: <b>PDB Molecule:</b> putative alginate lyase;<br><b>PDBTitle:</b> crystal structure of alg17c mutant y258a                                                                                                                        |
| 76 | <a href="#">c3nfvA</a>  | Alignment | not modelled | 27.6 | 13 | <b>PDB header:</b> lyase<br><b>Chain:</b> A: <b>PDB Molecule:</b> alginate lyase;<br><b>PDBTitle:</b> crystal structure of an alginate lyase (bacova_01668) from bacteroides2 ovatus at 1.95 a resolution                                                                      |
| 77 | <a href="#">c4zwc</a>   | Alignment | not modelled | 27.3 | 19 | <b>PDB header:</b> signaling protein<br><b>Chain:</b> C: <b>PDB Molecule:</b> chimera protein of human rhodopsin, mouse s-arrestin, and<br><b>PDBTitle:</b> crystal structure of rhodopsin bound to arrestin by                                                                |

|    |                         |           |              |      |    |                                                                                                                                                                                                                                                            |
|----|-------------------------|-----------|--------------|------|----|------------------------------------------------------------------------------------------------------------------------------------------------------------------------------------------------------------------------------------------------------------|
|    |                         |           |              |      |    | femtosecond x-ray2 laser                                                                                                                                                                                                                                   |
| 78 | <a href="#">c2okxB</a>  | Alignment | not modelled | 20.4 | 12 | <b>PDB header:</b> hydrolase<br><b>Chain:</b> B: <b>PDB Molecule:</b> rhamnosidase b;<br><b>PDBTitle:</b> crystal structure of gh78 family rhamnosidase of bacillus sp. gl1 at2 1.9 a                                                                      |
| 79 | <a href="#">c4quwA</a>  | Alignment | not modelled | 17.4 | 27 | <b>PDB header:</b> lyase<br><b>Chain:</b> A: <b>PDB Molecule:</b> aldehyde decarboxylase;<br><b>PDBTitle:</b> crystal structure of the apo form of cyanobacterial aldehyde-2 deformylating oxygenase                                                       |
| 80 | <a href="#">c3a0oB</a>  | Alignment | not modelled | 17.1 | 7  | <b>PDB header:</b> lyase<br><b>Chain:</b> B: <b>PDB Molecule:</b> oligo alginate lyase;<br><b>PDBTitle:</b> crystal structure of alginate lyase from agrobacterium tumefaciens c58                                                                         |
| 81 | <a href="#">d1f53a</a>  | Alignment | not modelled | 15.3 | 70 | <b>Fold:</b> gamma-Crystallin-like<br><b>Superfamily:</b> gamma-Crystallin-like<br><b>Family:</b> Killer toxin-like protein SKLP                                                                                                                           |
| 82 | <a href="#">c3adyA</a>  | Alignment | not modelled | 14.5 | 14 | <b>PDB header:</b> proton transport<br><b>Chain:</b> A: <b>PDB Molecule:</b> dotd;<br><b>PDBTitle:</b> crystal structure of dotd from legionella                                                                                                           |
| 83 | <a href="#">d1x9da1</a> | Alignment | not modelled | 13.6 | 7  | <b>Fold:</b> alpha/alpha toroid<br><b>Superfamily:</b> Seven-hairpin glycosidases<br><b>Family:</b> Class I alpha-1,2-mannosidase, catalytic domain                                                                                                        |
| 84 | <a href="#">c1x9dA</a>  | Alignment | not modelled | 13.6 | 7  | <b>PDB header:</b> hydrolase<br><b>Chain:</b> A: <b>PDB Molecule:</b> endoplasmic reticulum mannosyl-oligosaccharide 1,<br><b>PDBTitle:</b> crystal structure of human class i alpha-1,2-mannosidase in2 complex with thio-disaccharide substrate analogue |
| 85 | <a href="#">c3t33A</a>  | Alignment | not modelled | 13.0 | 13 | <b>PDB header:</b> signaling protein receptor<br><b>Chain:</b> A: <b>PDB Molecule:</b> g protein coupled receptor;<br><b>PDBTitle:</b> crystal structure of arabidopsis gcr2                                                                               |
| 86 | <a href="#">d1pjwa</a>  | Alignment | not modelled | 12.2 | 38 | <b>Fold:</b> Immunoglobulin-like beta-sandwich<br><b>Superfamily:</b> E set domains<br><b>Family:</b> Class II viral fusion proteins C-terminal domain                                                                                                     |
| 87 | <a href="#">d1g4ma2</a> | Alignment | not modelled | 11.4 | 17 | <b>Fold:</b> Immunoglobulin-like beta-sandwich<br><b>Superfamily:</b> E set domains<br><b>Family:</b> Arrestin/Vps26-like                                                                                                                                  |
| 88 | <a href="#">c4ozwA</a>  | Alignment | not modelled | 11.4 | 13 | <b>PDB header:</b> lyase<br><b>Chain:</b> A: <b>PDB Molecule:</b> alginate lyase;<br><b>PDBTitle:</b> crystal structure of the periplasmic alginate lyase algI h202a mutant                                                                                |
| 89 | <a href="#">c3vhxF</a>  | Alignment | not modelled | 10.8 | 40 | <b>PDB header:</b> cell cycle/signaling protein<br><b>Chain:</b> F: <b>PDB Molecule:</b> kinesin-like protein kif23;<br><b>PDBTitle:</b> the crystal structure of arf6-mklp1 (mitotic kinesin-like protein 1)2 complex                                     |
| 90 | <a href="#">c4fnvA</a>  | Alignment | not modelled | 10.7 | 10 | <b>PDB header:</b> lyase<br><b>Chain:</b> A: <b>PDB Molecule:</b> heparinase iii protein, heparitin sulfate lyase;<br><b>PDBTitle:</b> crystal structure of heparinase iii                                                                                 |
| 91 | <a href="#">c5bp8A</a>  | Alignment | not modelled | 10.4 | 12 | <b>PDB header:</b> isomerase<br><b>Chain:</b> A: <b>PDB Molecule:</b> ent-copalyl diphosphate synthase;<br><b>PDBTitle:</b> ent-copalyl diphosphate synthase from streptomyces platensis                                                                   |
| 92 | <a href="#">d2oc5a1</a> | Alignment | not modelled | 10.1 | 19 | <b>Fold:</b> Ferritin-like<br><b>Superfamily:</b> Ferritin-like<br><b>Family:</b> PMT1231-like                                                                                                                                                             |
| 93 | <a href="#">c2c3wB</a>  | Alignment | not modelled | 9.6  | 16 | <b>PDB header:</b> sugar-binding protein<br><b>Chain:</b> B: <b>PDB Molecule:</b> alpha-amylase g-6;<br><b>PDBTitle:</b> structure of cbm25 from bacillus halodurans amylase in2 complex with maltotetraose                                                |
| 94 | <a href="#">c4hfkC</a>  | Alignment | not modelled | 8.6  | 44 | <b>PDB header:</b> hydrolase<br><b>Chain:</b> C: <b>PDB Molecule:</b> putative cytoplasmic protein;<br><b>PDBTitle:</b> crystal structure of the type vi effector-immunity complex tae4-tai42 from enterobacter cloacae                                    |
| 95 | <a href="#">c4zlgA</a>  | Alignment | not modelled | 7.8  | 17 | <b>PDB header:</b> transferase<br><b>Chain:</b> A: <b>PDB Molecule:</b> putative b-glycan phosphorylase;<br><b>PDBTitle:</b> cellobionic acid phosphorylase - gluconic acid complex                                                                        |
| 96 | <a href="#">c3egpA</a>  | Alignment | not modelled | 7.4  | 29 | <b>PDB header:</b> viral protein<br><b>Chain:</b> A: <b>PDB Molecule:</b> envelope protein;<br><b>PDBTitle:</b> crystal structure analysis of dengue-1 envelope protein2 domain iii                                                                        |
| 97 | <a href="#">c2jqmA</a>  | Alignment | not modelled | 7.3  | 33 | <b>PDB header:</b> transferase<br><b>Chain:</b> A: <b>PDB Molecule:</b> envelope protein e;<br><b>PDBTitle:</b> yellow fever envelope protein domain iii nmr structure2 (s288-k398)                                                                        |
| 98 | <a href="#">c4xhcB</a>  | Alignment | not modelled | 7.2  | 16 | <b>PDB header:</b> hydrolase<br><b>Chain:</b> B: <b>PDB Molecule:</b> alpha-l-rhamnosidase;<br><b>PDBTitle:</b> rhamnosidase from klebsiella oxytoca with rhamnose bound                                                                                   |
| 99 | <a href="#">c3c67B</a>  | Alignment | not modelled | 6.9  | 11 | <b>PDB header:</b> hydrolase<br><b>Chain:</b> B: <b>PDB Molecule:</b> uncharacterized protein ygjk;<br><b>PDBTitle:</b> escherichia coli k12 ygjk in a complexed with glucose                                                                              |
