# Supplementary material for: Insights into the mechanism(s) of digestion of crystalline cellulose by plant class C GH9 endoglucanases
Source: PubMed Central journal article supplement (PMC7385011; doi:10.1007/s00894-019-4133-1), 2019-07-23
Supplement: 894_2019_4133_MOESM4_ESM.pdf [file 894_2019_4133_MOESM4_ESM.pdf]

Supplementary Text 2

CORE DATA FOR CHARACTERIZED CLASS C ENZYMES (n=4)

core size 548 of 549 vol = 11549.34  
core size 547 of 549 vol = 11146  
core size 546 of 549 vol = 10800.37  
core size 545 of 549 vol = 10520.18  
core size 544 of 549 vol = 10225.85  
core size 543 of 549 vol = 9952.053  
core size 542 of 549 vol = 9725.465  
core size 541 of 549 vol = 9458.279  
core size 540 of 549 vol = 9238.865  
core size 539 of 549 vol = 9085.986  
core size 538 of 549 vol = 8936.245  
core size 537 of 549 vol = 8779.894  
core size 536 of 549 vol = 8600.741  
core size 535 of 549 vol = 8465.594  
core size 534 of 549 vol = 8320.988  
core size 533 of 549 vol = 8200.51  
core size 532 of 549 vol = 8069.776  
core size 531 of 549 vol = 7918.135  
core size 530 of 549 vol = 7777.273  
core size 529 of 549 vol = 7616.265  
core size 528 of 549 vol = 7452.964  
core size 527 of 549 vol = 7304.85  
core size 526 of 549 vol = 7165.322  
core size 525 of 549 vol = 7002.892  
core size 524 of 549 vol = 6868.519  
core size 523 of 549 vol = 6758.486  
core size 522 of 549 vol = 6588.348  
core size 521 of 549 vol = 6457.909  
core size 520 of 549 vol = 6339.408  
core size 519 of 549 vol = 6193.373  
core size 518 of 549 vol = 6072.35  
core size 517 of 549 vol = 5985.027  
core size 516 of 549 vol = 5889.505  
core size 515 of 549 vol = 5748.135  
core size 514 of 549 vol = 5626.627  
core size 513 of 549 vol = 5489.616  
core size 512 of 549 vol = 5384.707  
core size 511 of 549 vol = 5282.662  
core size 510 of 549 vol = 5211.892  
core size 509 of 549 vol = 5138.043  
core size 508 of 549 vol = 5052.283  
core size 507 of 549 vol = 4932.191  
core size 506 of 549 vol = 4826.217  
core size 505 of 549 vol = 4717.266  
core size 504 of 549 vol = 4615.957  
core size 503 of 549 vol = 4499.585  
core size 502 of 549 vol = 4407.499  
core size 501 of 549 vol = 4336.905

Supplementary Text 2

|                      |                |
|----------------------|----------------|
| core size 500 of 549 | vol = 4259.404 |
| core size 499 of 549 | vol = 4176.257 |
| core size 498 of 549 | vol = 4068.747 |
| core size 497 of 549 | vol = 3941.515 |
| core size 496 of 549 | vol = 3876.428 |
| core size 495 of 549 | vol = 3768.892 |
| core size 494 of 549 | vol = 3702.426 |
| core size 493 of 549 | vol = 3600.703 |
| core size 492 of 549 | vol = 3522.113 |
| core size 491 of 549 | vol = 3430.101 |
| core size 490 of 549 | vol = 3343.208 |
| core size 489 of 549 | vol = 3254.875 |
| core size 488 of 549 | vol = 3172.272 |
| core size 487 of 549 | vol = 3101.88  |
| core size 486 of 549 | vol = 3009.919 |
| core size 485 of 549 | vol = 2942.776 |
| core size 484 of 549 | vol = 2881.93  |
| core size 483 of 549 | vol = 2809.671 |
| core size 482 of 549 | vol = 2741.45  |
| core size 481 of 549 | vol = 2680.1   |
| core size 480 of 549 | vol = 2618.965 |
| core size 479 of 549 | vol = 2556.74  |
| core size 478 of 549 | vol = 2494.844 |
| core size 477 of 549 | vol = 2452.548 |
| core size 476 of 549 | vol = 2406.872 |
| core size 475 of 549 | vol = 2356.446 |
| core size 474 of 549 | vol = 2295.36  |
| core size 473 of 549 | vol = 2246.961 |
| core size 472 of 549 | vol = 2202.74  |
| core size 471 of 549 | vol = 2151.995 |
| core size 470 of 549 | vol = 2102.709 |
| core size 469 of 549 | vol = 2061.566 |
| core size 468 of 549 | vol = 2019.258 |
| core size 467 of 549 | vol = 1978.29  |
| core size 466 of 549 | vol = 1934.788 |
| core size 465 of 549 | vol = 1898.292 |
| core size 464 of 549 | vol = 1851.537 |
| core size 463 of 549 | vol = 1814.156 |
| core size 462 of 549 | vol = 1778.773 |
| core size 461 of 549 | vol = 1747.659 |
| core size 460 of 549 | vol = 1721.848 |
| core size 459 of 549 | vol = 1696.304 |
| core size 458 of 549 | vol = 1665.789 |
| core size 457 of 549 | vol = 1634.875 |
| core size 456 of 549 | vol = 1607.911 |
| core size 455 of 549 | vol = 1576.951 |
| core size 454 of 549 | vol = 1546.36  |
| core size 453 of 549 | vol = 1517.168 |
| core size 452 of 549 | vol = 1491.31  |
| core size 451 of 549 | vol = 1464.495 |

Supplementary Text 2

core size 450 of 549 vol = 1444.334  
core size 449 of 549 vol = 1418.78  
core size 448 of 549 vol = 1386.969  
core size 447 of 549 vol = 1356.811  
core size 446 of 549 vol = 1333.629  
core size 445 of 549 vol = 1300.589  
core size 444 of 549 vol = 1280.904  
core size 443 of 549 vol = 1249.728  
core size 442 of 549 vol = 1229.532  
core size 441 of 549 vol = 1205.699  
core size 440 of 549 vol = 1183.69  
core size 439 of 549 vol = 1164.624  
core size 438 of 549 vol = 1142.88  
core size 437 of 549 vol = 1117.374  
core size 436 of 549 vol = 1092.248  
core size 435 of 549 vol = 1073.746  
core size 434 of 549 vol = 1052.639  
core size 433 of 549 vol = 1036.802  
core size 432 of 549 vol = 1017.351  
core size 431 of 549 vol = 995.533  
core size 430 of 549 vol = 975.699  
core size 429 of 549 vol = 961.216  
core size 428 of 549 vol = 955.268  
core size 427 of 549 vol = 937.178  
core size 426 of 549 vol = 921.012  
core size 425 of 549 vol = 908.44  
core size 424 of 549 vol = 890.574  
core size 423 of 549 vol = 872.222  
core size 422 of 549 vol = 855.459  
core size 421 of 549 vol = 839.649  
core size 420 of 549 vol = 823.711  
core size 419 of 549 vol = 807.838  
core size 418 of 549 vol = 791.948  
core size 417 of 549 vol = 776.438  
core size 416 of 549 vol = 761.226  
core size 415 of 549 vol = 746.069  
core size 414 of 549 vol = 730.965  
core size 413 of 549 vol = 718.985  
core size 412 of 549 vol = 706.163  
core size 411 of 549 vol = 693.076  
core size 410 of 549 vol = 679.913  
core size 409 of 549 vol = 670.317  
core size 408 of 549 vol = 658.6  
core size 407 of 549 vol = 647.147  
core size 406 of 549 vol = 634.784  
core size 405 of 549 vol = 624.636  
core size 404 of 549 vol = 614.899  
core size 403 of 549 vol = 606.764  
core size 402 of 549 vol = 598.078  
core size 401 of 549 vol = 588.66

Supplementary Text 2

|                      |               |
|----------------------|---------------|
| core size 400 of 549 | vol = 578.449 |
| core size 399 of 549 | vol = 571.126 |
| core size 398 of 549 | vol = 563.662 |
| core size 397 of 549 | vol = 555.82  |
| core size 396 of 549 | vol = 548.181 |
| core size 395 of 549 | vol = 539.51  |
| core size 394 of 549 | vol = 530.113 |
| core size 393 of 549 | vol = 521.448 |
| core size 392 of 549 | vol = 513.948 |
| core size 391 of 549 | vol = 507.857 |
| core size 390 of 549 | vol = 499.963 |
| core size 389 of 549 | vol = 492.738 |
| core size 388 of 549 | vol = 484.487 |
| core size 387 of 549 | vol = 477.752 |
| core size 386 of 549 | vol = 471.432 |
| core size 385 of 549 | vol = 465.526 |
| core size 384 of 549 | vol = 459.41  |
| core size 383 of 549 | vol = 453.35  |
| core size 382 of 549 | vol = 446.668 |
| core size 381 of 549 | vol = 439.578 |
| core size 380 of 549 | vol = 431.916 |
| core size 379 of 549 | vol = 425.083 |
| core size 378 of 549 | vol = 419.541 |
| core size 377 of 549 | vol = 413.995 |
| core size 376 of 549 | vol = 408.247 |
| core size 375 of 549 | vol = 404.809 |
| core size 374 of 549 | vol = 398.661 |
| core size 373 of 549 | vol = 391.417 |
| core size 372 of 549 | vol = 383.697 |
| core size 371 of 549 | vol = 378.382 |
| core size 370 of 549 | vol = 371.965 |
| core size 369 of 549 | vol = 366.865 |
| core size 368 of 549 | vol = 361.968 |
| core size 367 of 549 | vol = 356.267 |
| core size 366 of 549 | vol = 351.749 |
| core size 365 of 549 | vol = 346.745 |
| core size 364 of 549 | vol = 340.165 |
| core size 363 of 549 | vol = 335.265 |
| core size 362 of 549 | vol = 330.816 |
| core size 361 of 549 | vol = 324.933 |
| core size 360 of 549 | vol = 320.763 |
| core size 359 of 549 | vol = 315.61  |
| core size 358 of 549 | vol = 310.889 |
| core size 357 of 549 | vol = 306.127 |
| core size 356 of 549 | vol = 300.897 |
| core size 355 of 549 | vol = 295.722 |
| core size 354 of 549 | vol = 292.082 |
| core size 353 of 549 | vol = 287.978 |
| core size 352 of 549 | vol = 285.307 |
| core size 351 of 549 | vol = 281.703 |

Supplementary Text 2

core size 350 of 549 vol = 277.265  
core size 349 of 549 vol = 274.277  
core size 348 of 549 vol = 270.535  
core size 347 of 549 vol = 267.902  
core size 346 of 549 vol = 265.058  
core size 345 of 549 vol = 262.59  
core size 344 of 549 vol = 259.813  
core size 343 of 549 vol = 255.277  
core size 342 of 549 vol = 252.031  
core size 341 of 549 vol = 248.641  
core size 340 of 549 vol = 247.448  
core size 339 of 549 vol = 243.09  
core size 338 of 549 vol = 238.753  
core size 337 of 549 vol = 234.927  
core size 336 of 549 vol = 230.831  
core size 335 of 549 vol = 227.404  
core size 334 of 549 vol = 224.89  
core size 333 of 549 vol = 222.864  
core size 332 of 549 vol = 220.274  
core size 331 of 549 vol = 217.735  
core size 330 of 549 vol = 214.715  
core size 329 of 549 vol = 211.673  
core size 328 of 549 vol = 209.209  
core size 327 of 549 vol = 206.204  
core size 326 of 549 vol = 204.268  
core size 325 of 549 vol = 201.424  
core size 324 of 549 vol = 198.574  
core size 323 of 549 vol = 196.336  
core size 322 of 549 vol = 194.324  
core size 321 of 549 vol = 193.181  
core size 320 of 549 vol = 190.265  
core size 319 of 549 vol = 187.054  
core size 318 of 549 vol = 185.427  
core size 317 of 549 vol = 184.379  
core size 316 of 549 vol = 181.659  
core size 315 of 549 vol = 180.624  
core size 314 of 549 vol = 178.681  
core size 313 of 549 vol = 177.15  
core size 312 of 549 vol = 175.311  
core size 311 of 549 vol = 173.475  
core size 310 of 549 vol = 171.428  
core size 309 of 549 vol = 169.038  
core size 308 of 549 vol = 167.708  
core size 307 of 549 vol = 165.818  
core size 306 of 549 vol = 164.518  
core size 305 of 549 vol = 162.959  
core size 304 of 549 vol = 161.277  
core size 303 of 549 vol = 157.993  
core size 302 of 549 vol = 155.784  
core size 301 of 549 vol = 153.725

Supplementary Text 2

|                      |               |
|----------------------|---------------|
| core size 300 of 549 | vol = 152.063 |
| core size 299 of 549 | vol = 149.735 |
| core size 298 of 549 | vol = 147.607 |
| core size 297 of 549 | vol = 146.179 |
| core size 296 of 549 | vol = 144.607 |
| core size 295 of 549 | vol = 143.141 |
| core size 294 of 549 | vol = 141.474 |
| core size 293 of 549 | vol = 139.106 |
| core size 292 of 549 | vol = 137.709 |
| core size 291 of 549 | vol = 136.601 |
| core size 290 of 549 | vol = 135.889 |
| core size 289 of 549 | vol = 134.72  |
| core size 288 of 549 | vol = 132.843 |
| core size 287 of 549 | vol = 131.177 |
| core size 286 of 549 | vol = 129.994 |
| core size 285 of 549 | vol = 128.801 |
| core size 284 of 549 | vol = 127.093 |
| core size 283 of 549 | vol = 126.473 |
| core size 282 of 549 | vol = 124.646 |
| core size 281 of 549 | vol = 123.925 |
| core size 280 of 549 | vol = 122.32  |
| core size 279 of 549 | vol = 120.874 |
| core size 278 of 549 | vol = 119.497 |
| core size 277 of 549 | vol = 118.035 |
| core size 276 of 549 | vol = 116.785 |
| core size 275 of 549 | vol = 115.138 |
| core size 274 of 549 | vol = 114.049 |
| core size 273 of 549 | vol = 113.065 |
| core size 272 of 549 | vol = 111.709 |
| core size 271 of 549 | vol = 110.838 |
| core size 270 of 549 | vol = 108.771 |
| core size 269 of 549 | vol = 107.875 |
| core size 268 of 549 | vol = 106.355 |
| core size 267 of 549 | vol = 105.005 |
| core size 266 of 549 | vol = 104.069 |
| core size 265 of 549 | vol = 102.707 |
| core size 264 of 549 | vol = 101.469 |
| core size 263 of 549 | vol = 99.506  |
| core size 262 of 549 | vol = 98.427  |
| core size 261 of 549 | vol = 97.61   |
| core size 260 of 549 | vol = 96.401  |
| core size 259 of 549 | vol = 95.583  |
| core size 258 of 549 | vol = 94.177  |
| core size 257 of 549 | vol = 92.641  |
| core size 256 of 549 | vol = 91.211  |
| core size 255 of 549 | vol = 90.316  |
| core size 254 of 549 | vol = 88.78   |
| core size 253 of 549 | vol = 87.868  |
| core size 252 of 549 | vol = 86.809  |
| core size 251 of 549 | vol = 85.902  |

Supplementary Text 2

|                      |              |
|----------------------|--------------|
| core size 250 of 549 | vol = 84.546 |
| core size 249 of 549 | vol = 83.199 |
| core size 248 of 549 | vol = 82.056 |
| core size 247 of 549 | vol = 80.994 |
| core size 246 of 549 | vol = 79.986 |
| core size 245 of 549 | vol = 79.145 |
| core size 244 of 549 | vol = 78.26  |
| core size 243 of 549 | vol = 76.586 |
| core size 242 of 549 | vol = 75.487 |
| core size 241 of 549 | vol = 74.202 |
| core size 240 of 549 | vol = 73.02  |
| core size 239 of 549 | vol = 72.49  |
| core size 238 of 549 | vol = 72.292 |
| core size 237 of 549 | vol = 71.842 |
| core size 236 of 549 | vol = 71.008 |
| core size 235 of 549 | vol = 69.933 |
| core size 234 of 549 | vol = 68.574 |
| core size 233 of 549 | vol = 67.622 |
| core size 232 of 549 | vol = 66.915 |
| core size 231 of 549 | vol = 65.867 |
| core size 230 of 549 | vol = 65.298 |
| core size 229 of 549 | vol = 64.708 |
| core size 228 of 549 | vol = 63.607 |
| core size 227 of 549 | vol = 63.044 |
| core size 226 of 549 | vol = 61.98  |
| core size 225 of 549 | vol = 60.822 |
| core size 224 of 549 | vol = 60.109 |
| core size 223 of 549 | vol = 58.526 |
| core size 222 of 549 | vol = 57.26  |
| core size 221 of 549 | vol = 56.388 |
| core size 220 of 549 | vol = 55.271 |
| core size 219 of 549 | vol = 54.173 |
| core size 218 of 549 | vol = 53.351 |
| core size 217 of 549 | vol = 52.633 |
| core size 216 of 549 | vol = 52.21  |
| core size 215 of 549 | vol = 51.613 |
| core size 214 of 549 | vol = 50.764 |
| core size 213 of 549 | vol = 50.185 |
| core size 212 of 549 | vol = 49.238 |
| core size 211 of 549 | vol = 48.58  |
| core size 210 of 549 | vol = 47.092 |
| core size 209 of 549 | vol = 46.706 |
| core size 208 of 549 | vol = 45.742 |
| core size 207 of 549 | vol = 45.082 |
| core size 206 of 549 | vol = 44.814 |
| core size 205 of 549 | vol = 44.124 |
| core size 204 of 549 | vol = 43.345 |
| core size 203 of 549 | vol = 42.048 |
| core size 202 of 549 | vol = 41.578 |
| core size 201 of 549 | vol = 41.428 |

Supplementary Text 2

|                      |              |
|----------------------|--------------|
| core size 200 of 549 | vol = 41.964 |
| core size 199 of 549 | vol = 41.41  |
| core size 198 of 549 | vol = 40.66  |
| core size 197 of 549 | vol = 41.153 |
| core size 196 of 549 | vol = 40.496 |
| core size 195 of 549 | vol = 39.967 |
| core size 194 of 549 | vol = 39.37  |
| core size 193 of 549 | vol = 38.901 |
| core size 192 of 549 | vol = 38.503 |
| core size 191 of 549 | vol = 37.662 |
| core size 190 of 549 | vol = 37.104 |
| core size 189 of 549 | vol = 36.594 |
| core size 188 of 549 | vol = 36.591 |
| core size 187 of 549 | vol = 36.099 |
| core size 186 of 549 | vol = 35.525 |
| core size 185 of 549 | vol = 34.311 |
| core size 184 of 549 | vol = 33.483 |
| core size 183 of 549 | vol = 33.136 |
| core size 182 of 549 | vol = 32.626 |
| core size 181 of 549 | vol = 32.199 |
| core size 180 of 549 | vol = 31.588 |
| core size 179 of 549 | vol = 31.087 |
| core size 178 of 549 | vol = 30.764 |
| core size 177 of 549 | vol = 30.409 |
| core size 176 of 549 | vol = 29.194 |
| core size 175 of 549 | vol = 29.066 |
| core size 174 of 549 | vol = 28.53  |
| core size 173 of 549 | vol = 28.095 |
| core size 172 of 549 | vol = 27.375 |
| core size 171 of 549 | vol = 27.001 |
| core size 170 of 549 | vol = 26.6   |
| core size 169 of 549 | vol = 25.991 |
| core size 168 of 549 | vol = 25.446 |
| core size 167 of 549 | vol = 25.044 |
| core size 166 of 549 | vol = 24.724 |
| core size 165 of 549 | vol = 24.363 |
| core size 164 of 549 | vol = 23.965 |
| core size 163 of 549 | vol = 23.401 |
| core size 162 of 549 | vol = 22.823 |
| core size 161 of 549 | vol = 22.327 |
| core size 160 of 549 | vol = 21.936 |
| core size 159 of 549 | vol = 21.467 |
| core size 158 of 549 | vol = 21.067 |
| core size 157 of 549 | vol = 20.563 |
| core size 156 of 549 | vol = 20.146 |
| core size 155 of 549 | vol = 19.773 |
| core size 154 of 549 | vol = 19.375 |
| core size 153 of 549 | vol = 19.205 |
| core size 152 of 549 | vol = 18.967 |
| core size 151 of 549 | vol = 18.713 |



Supplementary Text 2

core size 150 of 549 vol = 18.222  
core size 149 of 549 vol = 18.032  
core size 148 of 549 vol = 17.801  
core size 147 of 549 vol = 17.519  
core size 146 of 549 vol = 17.15  
core size 145 of 549 vol = 17.107  
core size 144 of 549 vol = 16.686  
core size 143 of 549 vol = 16.193  
core size 142 of 549 vol = 16.157  
core size 141 of 549 vol = 15.628  
core size 140 of 549 vol = 15.416  
core size 139 of 549 vol = 15.372  
core size 138 of 549 vol = 14.733  
core size 137 of 549 vol = 14.466  
core size 136 of 549 vol = 14.145  
core size 135 of 549 vol = 14.342  
core size 134 of 549 vol = 14.227  
core size 133 of 549 vol = 14.466  
core size 132 of 549 vol = 14.198  
core size 131 of 549 vol = 14.105  
core size 130 of 549 vol = 13.922  
core size 129 of 549 vol = 13.542  
core size 128 of 549 vol = 13.13  
core size 127 of 549 vol = 13.168  
core size 126 of 549 vol = 12.959  
core size 125 of 549 vol = 12.738  
core size 124 of 549 vol = 12.356  
core size 123 of 549 vol = 12.232  
core size 122 of 549 vol = 12.264  
core size 121 of 549 vol = 12.185  
core size 120 of 549 vol = 11.799  
core size 119 of 549 vol = 11.55  
core size 118 of 549 vol = 11.006  
core size 117 of 549 vol = 10.796  
core size 116 of 549 vol = 10.928  
core size 115 of 549 vol = 10.829  
core size 114 of 549 vol = 10.843  
core size 113 of 549 vol = 10.5  
core size 112 of 549 vol = 10.536  
core size 111 of 549 vol = 9.938  
core size 110 of 549 vol = 9.878  
core size 109 of 549 vol = 9.812  
core size 108 of 549 vol = 9.559  
core size 107 of 549 vol = 9.323  
core size 106 of 549 vol = 9.168  
core size 105 of 549 vol = 8.736  
core size 104 of 549 vol = 8.51  
core size 103 of 549 vol = 8.382  
core size 102 of 549 vol = 8.161  
core size 101 of 549 vol = 8.427

Supplementary Text 2

core size 100 of 549 vol = 8.308  
core size 99 of 549 vol = 8.227  
core size 98 of 549 vol = 8.264  
core size 97 of 549 vol = 8.221  
core size 96 of 549 vol = 7.952  
core size 95 of 549 vol = 7.695  
core size 94 of 549 vol = 7.59  
core size 93 of 549 vol = 7.382  
core size 92 of 549 vol = 7.428  
core size 91 of 549 vol = 7.191  
core size 90 of 549 vol = 6.825  
core size 89 of 549 vol = 6.952  
core size 88 of 549 vol = 6.886  
core size 87 of 549 vol = 6.78  
core size 86 of 549 vol = 6.536  
core size 85 of 549 vol = 6.426  
core size 84 of 549 vol = 6.236  
core size 83 of 549 vol = 6.15  
core size 82 of 549 vol = 5.88  
core size 81 of 549 vol = 5.632  
core size 80 of 549 vol = 5.396  
core size 79 of 549 vol = 5.226  
core size 78 of 549 vol = 5.203  
core size 77 of 549 vol = 5.017  
core size 76 of 549 vol = 4.827  
core size 75 of 549 vol = 4.87  
core size 74 of 549 vol = 4.673  
core size 73 of 549 vol = 4.542  
core size 72 of 549 vol = 4.464  
core size 71 of 549 vol = 4.306  
core size 70 of 549 vol = 4.279  
core size 69 of 549 vol = 4.203  
core size 68 of 549 vol = 4.078  
core size 67 of 549 vol = 4.112  
core size 66 of 549 vol = 3.966  
core size 65 of 549 vol = 3.796  
core size 64 of 549 vol = 3.676  
core size 63 of 549 vol = 3.443  
core size 62 of 549 vol = 3.315  
core size 61 of 549 vol = 3.274  
core size 60 of 549 vol = 3.189  
core size 59 of 549 vol = 3.097  
core size 58 of 549 vol = 2.825  
core size 57 of 549 vol = 2.675  
core size 56 of 549 vol = 2.62  
core size 55 of 549 vol = 2.593  
core size 54 of 549 vol = 2.479  
core size 53 of 549 vol = 2.359  
core size 52 of 549 vol = 2.291  
core size 51 of 549 vol = 2.263

Supplementary Text 2

core size 50 of 549 vol = 2.181  
core size 49 of 549 vol = 2.097  
core size 48 of 549 vol = 1.965  
core size 47 of 549 vol = 1.87  
core size 46 of 549 vol = 1.799  
core size 45 of 549 vol = 1.649  
core size 44 of 549 vol = 1.605  
core size 43 of 549 vol = 1.445  
core size 42 of 549 vol = 1.309  
core size 41 of 549 vol = 1.298  
core size 40 of 549 vol = 1.221  
core size 39 of 549 vol = 1.144  
core size 38 of 549 vol = 0.956  
core size 37 of 549 vol = 0.88  
core size 36 of 549 vol = 0.866  
core size 35 of 549 vol = 0.773  
core size 34 of 549 vol = 0.758  
core size 33 of 549 vol = 0.848  
core size 32 of 549 vol = 0.783  
core size 31 of 549 vol = 0.72  
core size 30 of 549 vol = 0.704  
core size 29 of 549 vol = 0.592  
core size 28 of 549 vol = 0.493  
FINISHED: Min vol ( 0.5 ) reached

# 39 positions (cumulative volume <= 1 Angstrom^3)

|    | start | end | length |
|----|-------|-----|--------|
| 1  | 19    | 19  | 1      |
| 2  | 60    | 61  | 2      |
| 3  | 65    | 65  | 1      |
| 4  | 95    | 95  | 1      |
| 5  | 152   | 165 | 14     |
| 6  | 180   | 180 | 1      |
| 7  | 216   | 220 | 5      |
| 8  | 234   | 234 | 1      |
| 9  | 260   | 260 | 1      |
| 10 | 262   | 262 | 1      |
| 11 | 320   | 321 | 2      |
| 12 | 323   | 323 | 1      |
| 13 | 386   | 386 | 1      |
| 14 | 418   | 418 | 1      |
| 15 | 439   | 440 | 2      |
| 16 | 443   | 446 | 4      |

# 49 positions (cumulative volume <= 2 Angstrom^3)

|   | start | end | length |
|---|-------|-----|--------|
| 1 | 19    | 19  | 1      |
| 2 | 55    | 55  | 1      |
| 3 | 60    | 61  | 2      |
| 4 | 63    | 65  | 3      |

Supplementary Text 2

|    |     |     |    |
|----|-----|-----|----|
| 5  | 92  | 92  | 1  |
| 6  | 95  | 97  | 3  |
| 7  | 100 | 100 | 1  |
| 8  | 151 | 165 | 15 |
| 9  | 180 | 180 | 1  |
| 10 | 216 | 220 | 5  |
| 11 | 234 | 234 | 1  |
| 12 | 260 | 262 | 3  |
| 13 | 320 | 323 | 4  |
| 14 | 386 | 386 | 1  |
| 15 | 418 | 418 | 1  |
| 16 | 439 | 440 | 2  |
| 17 | 443 | 446 | 4  |

# 59 positions (cumulative volume <= 3 Angstrom^3)

|    | start | end | length |
|----|-------|-----|--------|
| 1  | 13    | 13  | 1      |
| 2  | 18    | 19  | 2      |
| 3  | 55    | 58  | 4      |
| 4  | 60    | 65  | 6      |
| 5  | 92    | 92  | 1      |
| 6  | 95    | 97  | 3      |
| 7  | 100   | 100 | 1      |
| 8  | 115   | 115 | 1      |
| 9  | 122   | 122 | 1      |
| 10 | 151   | 165 | 15     |
| 11 | 180   | 180 | 1      |
| 12 | 216   | 220 | 5      |
| 13 | 234   | 234 | 1      |
| 14 | 260   | 262 | 3      |
| 15 | 320   | 323 | 4      |
| 16 | 386   | 386 | 1      |
| 17 | 418   | 418 | 1      |
| 18 | 439   | 440 | 2      |
| 19 | 443   | 446 | 4      |
| 20 | 448   | 449 | 2      |

# 67 positions (cumulative volume <= 4 Angstrom^3)

|    | start | end | length |
|----|-------|-----|--------|
| 1  | 9     | 9   | 1      |
| 2  | 13    | 13  | 1      |
| 3  | 18    | 19  | 2      |
| 4  | 55    | 66  | 12     |
| 5  | 71    | 71  | 1      |
| 6  | 92    | 92  | 1      |
| 7  | 95    | 97  | 3      |
| 8  | 100   | 100 | 1      |
| 9  | 115   | 115 | 1      |
| 10 | 122   | 122 | 1      |
| 11 | 151   | 165 | 15     |
| 12 | 180   | 180 | 1      |
| 13 | 216   | 220 | 5      |

Supplementary Text 2

|    |     |     |   |
|----|-----|-----|---|
| 14 | 234 | 234 | 1 |
| 15 | 260 | 262 | 3 |
| 16 | 320 | 324 | 5 |
| 17 | 368 | 368 | 1 |
| 18 | 386 | 386 | 1 |
| 19 | 418 | 418 | 1 |
| 20 | 420 | 420 | 1 |
| 21 | 439 | 440 | 2 |
| 22 | 443 | 449 | 7 |

# 77 positions (cumulative volume <= 5 Angstrom^3)

|    | start | end | length |
|----|-------|-----|--------|
| 1  | 8     | 9   | 2      |
| 2  | 13    | 13  | 1      |
| 3  | 15    | 15  | 1      |
| 4  | 17    | 20  | 4      |
| 5  | 55    | 66  | 12     |
| 6  | 69    | 69  | 1      |
| 7  | 71    | 71  | 1      |
| 8  | 89    | 89  | 1      |
| 9  | 92    | 93  | 2      |
| 10 | 95    | 97  | 3      |
| 11 | 100   | 100 | 1      |
| 12 | 115   | 115 | 1      |
| 13 | 122   | 122 | 1      |
| 14 | 151   | 165 | 15     |
| 15 | 180   | 180 | 1      |
| 16 | 216   | 220 | 5      |
| 17 | 234   | 234 | 1      |
| 18 | 260   | 262 | 3      |
| 19 | 318   | 318 | 1      |
| 20 | 320   | 324 | 5      |
| 21 | 358   | 358 | 1      |
| 22 | 368   | 368 | 1      |
| 23 | 386   | 386 | 1      |
| 24 | 418   | 418 | 1      |
| 25 | 420   | 420 | 1      |
| 26 | 439   | 440 | 2      |
| 27 | 442   | 449 | 8      |

# 83 positions (cumulative volume <= 6 Angstrom^3)

|    | start | end | length |
|----|-------|-----|--------|
| 1  | 8     | 9   | 2      |
| 2  | 13    | 13  | 1      |
| 3  | 15    | 15  | 1      |
| 4  | 17    | 20  | 4      |
| 5  | 55    | 69  | 15     |
| 6  | 71    | 71  | 1      |
| 7  | 89    | 89  | 1      |
| 8  | 92    | 97  | 6      |
| 9  | 100   | 100 | 1      |
| 10 | 115   | 115 | 1      |

Supplementary Text 2

|    |     |     |    |
|----|-----|-----|----|
| 11 | 122 | 122 | 1  |
| 12 | 151 | 165 | 15 |
| 13 | 180 | 180 | 1  |
| 14 | 214 | 214 | 1  |
| 15 | 216 | 220 | 5  |
| 16 | 234 | 234 | 1  |
| 17 | 260 | 263 | 4  |
| 18 | 318 | 318 | 1  |
| 19 | 320 | 324 | 5  |
| 20 | 330 | 330 | 1  |
| 21 | 358 | 358 | 1  |
| 22 | 368 | 368 | 1  |
| 23 | 386 | 386 | 1  |
| 24 | 418 | 418 | 1  |
| 25 | 420 | 420 | 1  |
| 26 | 439 | 440 | 2  |
| 27 | 442 | 449 | 8  |

# 91 positions (cumulative volume <= 7 Angstrom^3)

|    | start | end | length |
|----|-------|-----|--------|
| 1  | 8     | 9   | 2      |
| 2  | 13    | 13  | 1      |
| 3  | 15    | 15  | 1      |
| 4  | 17    | 20  | 4      |
| 5  | 55    | 71  | 17     |
| 6  | 88    | 89  | 2      |
| 7  | 92    | 97  | 6      |
| 8  | 100   | 100 | 1      |
| 9  | 115   | 115 | 1      |
| 10 | 122   | 122 | 1      |
| 11 | 135   | 135 | 1      |
| 12 | 151   | 165 | 15     |
| 13 | 180   | 180 | 1      |
| 14 | 214   | 214 | 1      |
| 15 | 216   | 220 | 5      |
| 16 | 234   | 234 | 1      |
| 17 | 260   | 263 | 4      |
| 18 | 318   | 318 | 1      |
| 19 | 320   | 324 | 5      |
| 20 | 327   | 327 | 1      |
| 21 | 330   | 330 | 1      |
| 22 | 358   | 358 | 1      |
| 23 | 368   | 368 | 1      |
| 24 | 385   | 386 | 2      |
| 25 | 414   | 414 | 1      |
| 26 | 417   | 418 | 2      |
| 27 | 420   | 420 | 1      |
| 28 | 438   | 440 | 3      |
| 29 | 442   | 449 | 8      |

# 97 positions (cumulative volume <= 8 Angstrom^3)

|  | start | end | length |
|--|-------|-----|--------|
|--|-------|-----|--------|

Supplementary Text 2

|    |     |     |    |
|----|-----|-----|----|
| 1  | 8   | 9   | 2  |
| 2  | 13  | 13  | 1  |
| 3  | 15  | 15  | 1  |
| 4  | 17  | 20  | 4  |
| 5  | 36  | 36  | 1  |
| 6  | 47  | 47  | 1  |
| 7  | 55  | 71  | 17 |
| 8  | 88  | 89  | 2  |
| 9  | 92  | 97  | 6  |
| 10 | 100 | 100 | 1  |
| 11 | 105 | 105 | 1  |
| 12 | 115 | 115 | 1  |
| 13 | 122 | 122 | 1  |
| 14 | 135 | 135 | 1  |
| 15 | 151 | 165 | 15 |
| 16 | 180 | 180 | 1  |
| 17 | 214 | 214 | 1  |
| 18 | 216 | 220 | 5  |
| 19 | 234 | 234 | 1  |
| 20 | 260 | 263 | 4  |
| 21 | 318 | 318 | 1  |
| 22 | 320 | 324 | 5  |
| 23 | 327 | 327 | 1  |
| 24 | 330 | 330 | 1  |
| 25 | 358 | 358 | 1  |
| 26 | 360 | 360 | 1  |
| 27 | 362 | 362 | 1  |
| 28 | 368 | 368 | 1  |
| 29 | 385 | 386 | 2  |
| 30 | 414 | 414 | 1  |
| 31 | 417 | 418 | 2  |
| 32 | 420 | 420 | 1  |
| 33 | 438 | 440 | 3  |
| 34 | 442 | 449 | 8  |
| 35 | 504 | 504 | 1  |

# 106 positions (cumulative volume <= 9 Angstrom^3)

|    | start | end | length |
|----|-------|-----|--------|
| 1  | 8     | 9   | 2      |
| 2  | 12    | 13  | 2      |
| 3  | 15    | 20  | 6      |
| 4  | 28    | 28  | 1      |
| 5  | 36    | 36  | 1      |
| 6  | 47    | 47  | 1      |
| 7  | 55    | 71  | 17     |
| 8  | 88    | 90  | 3      |
| 9  | 92    | 97  | 6      |
| 10 | 100   | 100 | 1      |
| 11 | 103   | 103 | 1      |
| 12 | 105   | 105 | 1      |
| 13 | 109   | 109 | 1      |

Supplementary Text 2

|    |     |     |    |
|----|-----|-----|----|
| 14 | 115 | 115 | 1  |
| 15 | 122 | 122 | 1  |
| 16 | 135 | 135 | 1  |
| 17 | 151 | 165 | 15 |
| 18 | 180 | 180 | 1  |
| 19 | 214 | 220 | 7  |
| 20 | 234 | 234 | 1  |
| 21 | 260 | 263 | 4  |
| 22 | 318 | 318 | 1  |
| 23 | 320 | 324 | 5  |
| 24 | 327 | 327 | 1  |
| 25 | 330 | 330 | 1  |
| 26 | 358 | 360 | 3  |
| 27 | 362 | 362 | 1  |
| 28 | 368 | 368 | 1  |
| 29 | 385 | 386 | 2  |
| 30 | 414 | 414 | 1  |
| 31 | 416 | 418 | 3  |
| 32 | 420 | 420 | 1  |
| 33 | 438 | 440 | 3  |
| 34 | 442 | 449 | 8  |
| 35 | 504 | 504 | 1  |

# 112 positions (cumulative volume <= 10 Angstrom^3)

|    | start | end | length |
|----|-------|-----|--------|
| 1  | 8     | 9   | 2      |
| 2  | 12    | 13  | 2      |
| 3  | 15    | 20  | 6      |
| 4  | 28    | 28  | 1      |
| 5  | 36    | 36  | 1      |
| 6  | 47    | 47  | 1      |
| 7  | 55    | 71  | 17     |
| 8  | 88    | 90  | 3      |
| 9  | 92    | 98  | 7      |
| 10 | 100   | 101 | 2      |
| 11 | 103   | 103 | 1      |
| 12 | 105   | 105 | 1      |
| 13 | 109   | 109 | 1      |
| 14 | 113   | 113 | 1      |
| 15 | 115   | 115 | 1      |
| 16 | 122   | 122 | 1      |
| 17 | 135   | 135 | 1      |
| 18 | 140   | 140 | 1      |
| 19 | 148   | 148 | 1      |
| 20 | 151   | 165 | 15     |
| 21 | 180   | 180 | 1      |
| 22 | 214   | 220 | 7      |
| 23 | 234   | 234 | 1      |
| 24 | 260   | 263 | 4      |
| 25 | 318   | 318 | 1      |
| 26 | 320   | 324 | 5      |



Supplementary Text 2

|    |     |     |   |
|----|-----|-----|---|
| 27 | 327 | 327 | 1 |
| 28 | 330 | 330 | 1 |
| 29 | 358 | 360 | 3 |
| 30 | 362 | 362 | 1 |
| 31 | 368 | 368 | 1 |
| 32 | 385 | 386 | 2 |
| 33 | 414 | 414 | 1 |
| 34 | 416 | 418 | 3 |
| 35 | 420 | 420 | 1 |
| 36 | 428 | 428 | 1 |
| 37 | 438 | 440 | 3 |
| 38 | 442 | 449 | 8 |
| 39 | 504 | 504 | 1 |

# 118 positions (cumulative volume <= 11 Angstrom^3)

|    | start | end | length |
|----|-------|-----|--------|
| 1  | 8     | 9   | 2      |
| 2  | 12    | 13  | 2      |
| 3  | 15    | 20  | 6      |
| 4  | 28    | 28  | 1      |
| 5  | 36    | 36  | 1      |
| 6  | 42    | 42  | 1      |
| 7  | 46    | 47  | 2      |
| 8  | 49    | 49  | 1      |
| 9  | 55    | 71  | 17     |
| 10 | 88    | 90  | 3      |
| 11 | 92    | 98  | 7      |
| 12 | 100   | 101 | 2      |
| 13 | 103   | 103 | 1      |
| 14 | 105   | 105 | 1      |
| 15 | 109   | 109 | 1      |
| 16 | 113   | 113 | 1      |
| 17 | 115   | 115 | 1      |
| 18 | 122   | 122 | 1      |
| 19 | 126   | 126 | 1      |
| 20 | 135   | 135 | 1      |
| 21 | 140   | 140 | 1      |
| 22 | 148   | 148 | 1      |
| 23 | 151   | 165 | 15     |
| 24 | 175   | 176 | 2      |
| 25 | 180   | 180 | 1      |
| 26 | 214   | 220 | 7      |
| 27 | 234   | 234 | 1      |
| 28 | 260   | 263 | 4      |
| 29 | 318   | 318 | 1      |
| 30 | 320   | 324 | 5      |
| 31 | 327   | 327 | 1      |
| 32 | 330   | 330 | 1      |
| 33 | 358   | 360 | 3      |
| 34 | 362   | 362 | 1      |
| 35 | 368   | 368 | 1      |

Supplementary Text 2

|    |     |     |   |
|----|-----|-----|---|
| 36 | 385 | 386 | 2 |
| 37 | 414 | 414 | 1 |
| 38 | 416 | 418 | 3 |
| 39 | 420 | 420 | 1 |
| 40 | 428 | 428 | 1 |
| 41 | 438 | 440 | 3 |
| 42 | 442 | 449 | 8 |
| 43 | 504 | 504 | 1 |

# 121 positions (cumulative volume <= 12 Angstrom^3)

|    | start | end | length |
|----|-------|-----|--------|
| 1  | 8     | 9   | 2      |
| 2  | 12    | 20  | 9      |
| 3  | 28    | 28  | 1      |
| 4  | 36    | 36  | 1      |
| 5  | 42    | 42  | 1      |
| 6  | 46    | 47  | 2      |
| 7  | 49    | 49  | 1      |
| 8  | 55    | 72  | 18     |
| 9  | 88    | 90  | 3      |
| 10 | 92    | 98  | 7      |
| 11 | 100   | 101 | 2      |
| 12 | 103   | 103 | 1      |
| 13 | 105   | 105 | 1      |
| 14 | 109   | 109 | 1      |
| 15 | 113   | 113 | 1      |
| 16 | 115   | 115 | 1      |
| 17 | 122   | 122 | 1      |
| 18 | 126   | 126 | 1      |
| 19 | 135   | 135 | 1      |
| 20 | 140   | 140 | 1      |
| 21 | 148   | 148 | 1      |
| 22 | 151   | 165 | 15     |
| 23 | 175   | 176 | 2      |
| 24 | 180   | 180 | 1      |
| 25 | 214   | 220 | 7      |
| 26 | 234   | 234 | 1      |
| 27 | 251   | 251 | 1      |
| 28 | 260   | 263 | 4      |
| 29 | 318   | 318 | 1      |
| 30 | 320   | 324 | 5      |
| 31 | 327   | 327 | 1      |
| 32 | 330   | 330 | 1      |
| 33 | 358   | 360 | 3      |
| 34 | 362   | 362 | 1      |
| 35 | 368   | 368 | 1      |
| 36 | 385   | 386 | 2      |
| 37 | 414   | 414 | 1      |
| 38 | 416   | 418 | 3      |
| 39 | 420   | 420 | 1      |
| 40 | 428   | 428 | 1      |

Supplementary Text 2

|                                                      |       |     |        |
|------------------------------------------------------|-------|-----|--------|
| 41                                                   | 438   | 440 | 3      |
| 42                                                   | 442   | 449 | 8      |
| 43                                                   | 504   | 504 | 1      |
| # 127 positions (cumulative volume <= 13 Angstrom^3) |       |     |        |
|                                                      | start | end | length |
| 1                                                    | 8     | 9   | 2      |
| 2                                                    | 12    | 20  | 9      |
| 3                                                    | 28    | 28  | 1      |
| 4                                                    | 36    | 36  | 1      |
| 5                                                    | 42    | 42  | 1      |
| 6                                                    | 45    | 47  | 3      |
| 7                                                    | 49    | 49  | 1      |
| 8                                                    | 55    | 72  | 18     |
| 9                                                    | 88    | 98  | 11     |
| 10                                                   | 100   | 101 | 2      |
| 11                                                   | 103   | 103 | 1      |
| 12                                                   | 105   | 106 | 2      |
| 13                                                   | 109   | 109 | 1      |
| 14                                                   | 113   | 113 | 1      |
| 15                                                   | 115   | 115 | 1      |
| 16                                                   | 122   | 122 | 1      |
| 17                                                   | 126   | 126 | 1      |
| 18                                                   | 135   | 135 | 1      |
| 19                                                   | 140   | 140 | 1      |
| 20                                                   | 148   | 148 | 1      |
| 21                                                   | 151   | 165 | 15     |
| 22                                                   | 175   | 176 | 2      |
| 23                                                   | 180   | 180 | 1      |
| 24                                                   | 214   | 220 | 7      |
| 25                                                   | 234   | 234 | 1      |
| 26                                                   | 251   | 251 | 1      |
| 27                                                   | 260   | 263 | 4      |
| 28                                                   | 318   | 324 | 7      |
| 29                                                   | 327   | 327 | 1      |
| 30                                                   | 330   | 331 | 2      |
| 31                                                   | 356   | 356 | 1      |
| 32                                                   | 358   | 360 | 3      |
| 33                                                   | 362   | 362 | 1      |
| 34                                                   | 368   | 368 | 1      |
| 35                                                   | 385   | 386 | 2      |
| 36                                                   | 414   | 414 | 1      |
| 37                                                   | 416   | 418 | 3      |
| 38                                                   | 420   | 420 | 1      |
| 39                                                   | 428   | 428 | 1      |
| 40                                                   | 438   | 440 | 3      |
| 41                                                   | 442   | 449 | 8      |
| 42                                                   | 504   | 504 | 1      |
| # 131 positions (cumulative volume <= 14 Angstrom^3) |       |     |        |
|                                                      | start | end | length |
| 1                                                    | 8     | 9   | 2      |

Supplementary Text 2

|    |     |     |    |
|----|-----|-----|----|
| 2  | 12  | 20  | 9  |
| 3  | 28  | 28  | 1  |
| 4  | 36  | 36  | 1  |
| 5  | 42  | 42  | 1  |
| 6  | 45  | 47  | 3  |
| 7  | 49  | 49  | 1  |
| 8  | 55  | 72  | 18 |
| 9  | 88  | 98  | 11 |
| 10 | 100 | 101 | 2  |
| 11 | 103 | 103 | 1  |
| 12 | 105 | 106 | 2  |
| 13 | 109 | 109 | 1  |
| 14 | 113 | 113 | 1  |
| 15 | 115 | 115 | 1  |
| 16 | 122 | 122 | 1  |
| 17 | 126 | 126 | 1  |
| 18 | 135 | 135 | 1  |
| 19 | 140 | 140 | 1  |
| 20 | 148 | 148 | 1  |
| 21 | 150 | 165 | 16 |
| 22 | 175 | 176 | 2  |
| 23 | 180 | 180 | 1  |
| 24 | 189 | 189 | 1  |
| 25 | 214 | 221 | 8  |
| 26 | 234 | 234 | 1  |
| 27 | 251 | 251 | 1  |
| 28 | 260 | 263 | 4  |
| 29 | 313 | 313 | 1  |
| 30 | 318 | 324 | 7  |
| 31 | 327 | 327 | 1  |
| 32 | 330 | 331 | 2  |
| 33 | 356 | 356 | 1  |
| 34 | 358 | 360 | 3  |
| 35 | 362 | 362 | 1  |
| 36 | 368 | 368 | 1  |
| 37 | 385 | 386 | 2  |
| 38 | 414 | 414 | 1  |
| 39 | 416 | 418 | 3  |
| 40 | 420 | 420 | 1  |
| 41 | 428 | 428 | 1  |
| 42 | 438 | 440 | 3  |
| 43 | 442 | 449 | 8  |
| 44 | 504 | 504 | 1  |

# 139 positions (cumulative volume <= 15 Angstrom^3)

|   | start | end | length |
|---|-------|-----|--------|
| 1 | 8     | 9   | 2      |
| 2 | 12    | 20  | 9      |
| 3 | 28    | 28  | 1      |
| 4 | 33    | 33  | 1      |
| 5 | 36    | 36  | 1      |

Supplementary Text 2

|                                                      |       |     |        |
|------------------------------------------------------|-------|-----|--------|
| 6                                                    | 42    | 42  | 1      |
| 7                                                    | 45    | 49  | 5      |
| 8                                                    | 55    | 72  | 18     |
| 9                                                    | 88    | 98  | 11     |
| 10                                                   | 100   | 101 | 2      |
| 11                                                   | 103   | 103 | 1      |
| 12                                                   | 105   | 106 | 2      |
| 13                                                   | 109   | 109 | 1      |
| 14                                                   | 113   | 113 | 1      |
| 15                                                   | 115   | 115 | 1      |
| 16                                                   | 122   | 122 | 1      |
| 17                                                   | 126   | 126 | 1      |
| 18                                                   | 135   | 135 | 1      |
| 19                                                   | 140   | 140 | 1      |
| 20                                                   | 148   | 148 | 1      |
| 21                                                   | 150   | 165 | 16     |
| 22                                                   | 175   | 176 | 2      |
| 23                                                   | 180   | 180 | 1      |
| 24                                                   | 189   | 189 | 1      |
| 25                                                   | 214   | 221 | 8      |
| 26                                                   | 234   | 234 | 1      |
| 27                                                   | 251   | 251 | 1      |
| 28                                                   | 260   | 263 | 4      |
| 29                                                   | 313   | 314 | 2      |
| 30                                                   | 318   | 324 | 7      |
| 31                                                   | 327   | 327 | 1      |
| 32                                                   | 330   | 331 | 2      |
| 33                                                   | 356   | 356 | 1      |
| 34                                                   | 358   | 360 | 3      |
| 35                                                   | 362   | 362 | 1      |
| 36                                                   | 364   | 364 | 1      |
| 37                                                   | 366   | 368 | 3      |
| 38                                                   | 381   | 381 | 1      |
| 39                                                   | 385   | 386 | 2      |
| 40                                                   | 388   | 388 | 1      |
| 41                                                   | 414   | 414 | 1      |
| 42                                                   | 416   | 418 | 3      |
| 43                                                   | 420   | 420 | 1      |
| 44                                                   | 428   | 428 | 1      |
| 45                                                   | 438   | 440 | 3      |
| 46                                                   | 442   | 449 | 8      |
| 47                                                   | 504   | 504 | 1      |
| # 142 positions (cumulative volume <= 16 Angstrom^3) |       |     |        |
|                                                      | start | end | length |
| 1                                                    | 8     | 9   | 2      |
| 2                                                    | 12    | 20  | 9      |
| 3                                                    | 28    | 28  | 1      |
| 4                                                    | 33    | 33  | 1      |
| 5                                                    | 36    | 36  | 1      |
| 6                                                    | 42    | 42  | 1      |

Supplementary Text 2

|    |     |     |    |
|----|-----|-----|----|
| 7  | 45  | 49  | 5  |
| 8  | 55  | 72  | 18 |
| 9  | 88  | 98  | 11 |
| 10 | 100 | 101 | 2  |
| 11 | 103 | 103 | 1  |
| 12 | 105 | 106 | 2  |
| 13 | 109 | 109 | 1  |
| 14 | 113 | 113 | 1  |
| 15 | 115 | 115 | 1  |
| 16 | 122 | 122 | 1  |
| 17 | 126 | 126 | 1  |
| 18 | 135 | 135 | 1  |
| 19 | 140 | 140 | 1  |
| 20 | 148 | 148 | 1  |
| 21 | 150 | 165 | 16 |
| 22 | 175 | 176 | 2  |
| 23 | 180 | 180 | 1  |
| 24 | 189 | 189 | 1  |
| 25 | 214 | 221 | 8  |
| 26 | 234 | 234 | 1  |
| 27 | 251 | 251 | 1  |
| 28 | 260 | 263 | 4  |
| 29 | 313 | 314 | 2  |
| 30 | 318 | 324 | 7  |
| 31 | 327 | 327 | 1  |
| 32 | 329 | 331 | 3  |
| 33 | 333 | 333 | 1  |
| 34 | 356 | 356 | 1  |
| 35 | 358 | 360 | 3  |
| 36 | 362 | 362 | 1  |
| 37 | 364 | 364 | 1  |
| 38 | 366 | 368 | 3  |
| 39 | 381 | 381 | 1  |
| 40 | 383 | 383 | 1  |
| 41 | 385 | 386 | 2  |
| 42 | 388 | 388 | 1  |
| 43 | 414 | 414 | 1  |
| 44 | 416 | 418 | 3  |
| 45 | 420 | 420 | 1  |
| 46 | 428 | 428 | 1  |
| 47 | 438 | 440 | 3  |
| 48 | 442 | 449 | 8  |
| 49 | 504 | 504 | 1  |

# 145 positions (cumulative volume <= 17 Angstrom^3)

|   | start | end | length |
|---|-------|-----|--------|
| 1 | 8     | 9   | 2      |
| 2 | 12    | 20  | 9      |
| 3 | 28    | 28  | 1      |
| 4 | 33    | 33  | 1      |
| 5 | 36    | 36  | 1      |

Supplementary Text 2

|    |     |     |    |
|----|-----|-----|----|
| 6  | 42  | 42  | 1  |
| 7  | 45  | 49  | 5  |
| 8  | 55  | 72  | 18 |
| 9  | 88  | 98  | 11 |
| 10 | 100 | 101 | 2  |
| 11 | 103 | 103 | 1  |
| 12 | 105 | 106 | 2  |
| 13 | 109 | 109 | 1  |
| 14 | 113 | 113 | 1  |
| 15 | 115 | 115 | 1  |
| 16 | 122 | 122 | 1  |
| 17 | 126 | 126 | 1  |
| 18 | 135 | 135 | 1  |
| 19 | 140 | 140 | 1  |
| 20 | 148 | 148 | 1  |
| 21 | 150 | 165 | 16 |
| 22 | 175 | 176 | 2  |
| 23 | 180 | 180 | 1  |
| 24 | 189 | 189 | 1  |
| 25 | 214 | 221 | 8  |
| 26 | 234 | 234 | 1  |
| 27 | 251 | 251 | 1  |
| 28 | 260 | 263 | 4  |
| 29 | 311 | 311 | 1  |
| 30 | 313 | 314 | 2  |
| 31 | 318 | 324 | 7  |
| 32 | 327 | 327 | 1  |
| 33 | 329 | 331 | 3  |
| 34 | 333 | 333 | 1  |
| 35 | 352 | 352 | 1  |
| 36 | 356 | 356 | 1  |
| 37 | 358 | 360 | 3  |
| 38 | 362 | 362 | 1  |
| 39 | 364 | 364 | 1  |
| 40 | 366 | 369 | 4  |
| 41 | 381 | 381 | 1  |
| 42 | 383 | 383 | 1  |
| 43 | 385 | 386 | 2  |
| 44 | 388 | 388 | 1  |
| 45 | 414 | 414 | 1  |
| 46 | 416 | 418 | 3  |
| 47 | 420 | 420 | 1  |
| 48 | 428 | 428 | 1  |
| 49 | 438 | 440 | 3  |
| 50 | 442 | 449 | 8  |
| 51 | 504 | 504 | 1  |

# 149 positions (cumulative volume <= 18 Angstrom^3)

|   | start | end | length |
|---|-------|-----|--------|
| 1 | 8     | 10  | 3      |
| 2 | 12    | 20  | 9      |

Supplementary Text 2

|    |     |     |    |
|----|-----|-----|----|
| 3  | 28  | 28  | 1  |
| 4  | 33  | 33  | 1  |
| 5  | 36  | 36  | 1  |
| 6  | 42  | 42  | 1  |
| 7  | 45  | 49  | 5  |
| 8  | 55  | 72  | 18 |
| 9  | 88  | 98  | 11 |
| 10 | 100 | 101 | 2  |
| 11 | 103 | 103 | 1  |
| 12 | 105 | 106 | 2  |
| 13 | 109 | 109 | 1  |
| 14 | 113 | 113 | 1  |
| 15 | 115 | 115 | 1  |
| 16 | 117 | 117 | 1  |
| 17 | 122 | 122 | 1  |
| 18 | 126 | 126 | 1  |
| 19 | 135 | 135 | 1  |
| 20 | 140 | 140 | 1  |
| 21 | 148 | 148 | 1  |
| 22 | 150 | 165 | 16 |
| 23 | 175 | 176 | 2  |
| 24 | 180 | 180 | 1  |
| 25 | 182 | 182 | 1  |
| 26 | 189 | 189 | 1  |
| 27 | 214 | 221 | 8  |
| 28 | 234 | 234 | 1  |
| 29 | 251 | 251 | 1  |
| 30 | 260 | 263 | 4  |
| 31 | 311 | 311 | 1  |
| 32 | 313 | 314 | 2  |
| 33 | 318 | 324 | 7  |
| 34 | 327 | 327 | 1  |
| 35 | 329 | 331 | 3  |
| 36 | 333 | 333 | 1  |
| 37 | 352 | 352 | 1  |
| 38 | 356 | 356 | 1  |
| 39 | 358 | 360 | 3  |
| 40 | 362 | 362 | 1  |
| 41 | 364 | 364 | 1  |
| 42 | 366 | 369 | 4  |
| 43 | 381 | 381 | 1  |
| 44 | 383 | 383 | 1  |
| 45 | 385 | 386 | 2  |
| 46 | 388 | 388 | 1  |
| 47 | 412 | 412 | 1  |
| 48 | 414 | 414 | 1  |
| 49 | 416 | 418 | 3  |
| 50 | 420 | 420 | 1  |
| 51 | 428 | 428 | 1  |
| 52 | 438 | 440 | 3  |



Supplementary Text 2

```

53  442 449      8
54  504 504      1
# 153 positions (cumulative volume <= 19 Angstrom^3)
  start end length
1     8  10      3
2    12  20      9
3    28  28      1
4    33  33      1
5    36  36      1
6    42  42      1
7    45  49      5
8    55  72     18
9    88  98     11
10   100 101      2
11   103 103      1
12   105 106      2
13   109 109      1
14   113 113      1
15   115 115      1
16   117 117      1
17   122 122      1
18   126 126      1
19   135 135      1
20   140 140      1
21   148 148      1
22   150 165     16
23   175 176      2
24   180 180      1
25   182 182      1
26   189 189      1
27   214 221      8
28   234 234      1
29   251 252      2
30   256 256      1
31   259 263      5
32   311 311      1
33   313 314      2
34   318 324      7
35   327 327      1
36   329 331      3
37   333 333      1
38   352 352      1
39   356 356      1
40   358 360      3
41   362 362      1
42   364 364      1
43   366 369      4
44   381 381      1
45   383 383      1
46   385 386      2

```

Supplementary Text 2

|                                                      |       |     |        |
|------------------------------------------------------|-------|-----|--------|
| 47                                                   | 388   | 388 | 1      |
| 48                                                   | 412   | 412 | 1      |
| 49                                                   | 414   | 418 | 5      |
| 50                                                   | 420   | 420 | 1      |
| 51                                                   | 428   | 428 | 1      |
| 52                                                   | 438   | 440 | 3      |
| 53                                                   | 442   | 449 | 8      |
| 54                                                   | 504   | 504 | 1      |
| # 156 positions (cumulative volume <= 20 Angstrom^3) |       |     |        |
|                                                      | start | end | length |
| 1                                                    | 8     | 10  | 3      |
| 2                                                    | 12    | 20  | 9      |
| 3                                                    | 28    | 28  | 1      |
| 4                                                    | 33    | 33  | 1      |
| 5                                                    | 36    | 36  | 1      |
| 6                                                    | 42    | 42  | 1      |
| 7                                                    | 45    | 49  | 5      |
| 8                                                    | 55    | 73  | 19     |
| 9                                                    | 88    | 98  | 11     |
| 10                                                   | 100   | 101 | 2      |
| 11                                                   | 103   | 103 | 1      |
| 12                                                   | 105   | 106 | 2      |
| 13                                                   | 109   | 109 | 1      |
| 14                                                   | 113   | 113 | 1      |
| 15                                                   | 115   | 115 | 1      |
| 16                                                   | 117   | 117 | 1      |
| 17                                                   | 122   | 123 | 2      |
| 18                                                   | 126   | 126 | 1      |
| 19                                                   | 135   | 135 | 1      |
| 20                                                   | 140   | 140 | 1      |
| 21                                                   | 148   | 148 | 1      |
| 22                                                   | 150   | 165 | 16     |
| 23                                                   | 175   | 176 | 2      |
| 24                                                   | 180   | 180 | 1      |
| 25                                                   | 182   | 182 | 1      |
| 26                                                   | 189   | 189 | 1      |
| 27                                                   | 214   | 221 | 8      |
| 28                                                   | 234   | 234 | 1      |
| 29                                                   | 251   | 252 | 2      |
| 30                                                   | 256   | 256 | 1      |
| 31                                                   | 259   | 263 | 5      |
| 32                                                   | 311   | 311 | 1      |
| 33                                                   | 313   | 314 | 2      |
| 34                                                   | 318   | 324 | 7      |
| 35                                                   | 327   | 327 | 1      |
| 36                                                   | 329   | 331 | 3      |
| 37                                                   | 333   | 333 | 1      |
| 38                                                   | 352   | 352 | 1      |
| 39                                                   | 356   | 356 | 1      |
| 40                                                   | 358   | 360 | 3      |

Supplementary Text 2

|                                                      |       |     |        |
|------------------------------------------------------|-------|-----|--------|
| 41                                                   | 362   | 362 | 1      |
| 42                                                   | 364   | 364 | 1      |
| 43                                                   | 366   | 369 | 4      |
| 44                                                   | 381   | 381 | 1      |
| 45                                                   | 383   | 383 | 1      |
| 46                                                   | 385   | 386 | 2      |
| 47                                                   | 388   | 388 | 1      |
| 48                                                   | 412   | 412 | 1      |
| 49                                                   | 414   | 418 | 5      |
| 50                                                   | 420   | 421 | 2      |
| 51                                                   | 428   | 428 | 1      |
| 52                                                   | 438   | 440 | 3      |
| 53                                                   | 442   | 449 | 8      |
| 54                                                   | 504   | 504 | 1      |
| # 158 positions (cumulative volume <= 21 Angstrom^3) |       |     |        |
|                                                      | start | end | length |
| 1                                                    | 8     | 10  | 3      |
| 2                                                    | 12    | 20  | 9      |
| 3                                                    | 28    | 28  | 1      |
| 4                                                    | 33    | 33  | 1      |
| 5                                                    | 36    | 36  | 1      |
| 6                                                    | 42    | 42  | 1      |
| 7                                                    | 45    | 49  | 5      |
| 8                                                    | 55    | 73  | 19     |
| 9                                                    | 88    | 98  | 11     |
| 10                                                   | 100   | 101 | 2      |
| 11                                                   | 103   | 103 | 1      |
| 12                                                   | 105   | 106 | 2      |
| 13                                                   | 109   | 109 | 1      |
| 14                                                   | 113   | 113 | 1      |
| 15                                                   | 115   | 115 | 1      |
| 16                                                   | 117   | 117 | 1      |
| 17                                                   | 122   | 123 | 2      |
| 18                                                   | 126   | 126 | 1      |
| 19                                                   | 135   | 135 | 1      |
| 20                                                   | 140   | 140 | 1      |
| 21                                                   | 148   | 148 | 1      |
| 22                                                   | 150   | 165 | 16     |
| 23                                                   | 175   | 176 | 2      |
| 24                                                   | 178   | 178 | 1      |
| 25                                                   | 180   | 180 | 1      |
| 26                                                   | 182   | 182 | 1      |
| 27                                                   | 189   | 189 | 1      |
| 28                                                   | 214   | 221 | 8      |
| 29                                                   | 234   | 234 | 1      |
| 30                                                   | 251   | 252 | 2      |
| 31                                                   | 256   | 256 | 1      |
| 32                                                   | 259   | 263 | 5      |
| 33                                                   | 311   | 311 | 1      |
| 34                                                   | 313   | 314 | 2      |

Supplementary Text 2

|    |     |     |   |
|----|-----|-----|---|
| 35 | 318 | 324 | 7 |
| 36 | 327 | 327 | 1 |
| 37 | 329 | 331 | 3 |
| 38 | 333 | 333 | 1 |
| 39 | 352 | 352 | 1 |
| 40 | 356 | 356 | 1 |
| 41 | 358 | 360 | 3 |
| 42 | 362 | 364 | 3 |
| 43 | 366 | 369 | 4 |
| 44 | 381 | 381 | 1 |
| 45 | 383 | 383 | 1 |
| 46 | 385 | 386 | 2 |
| 47 | 388 | 388 | 1 |
| 48 | 412 | 412 | 1 |
| 49 | 414 | 418 | 5 |
| 50 | 420 | 421 | 2 |
| 51 | 428 | 428 | 1 |
| 52 | 438 | 440 | 3 |
| 53 | 442 | 449 | 8 |
| 54 | 504 | 504 | 1 |

# 161 positions (cumulative volume <= 22 Angstrom^3)

|    | start | end | length |
|----|-------|-----|--------|
| 1  | 1     | 1   | 1      |
| 2  | 8     | 10  | 3      |
| 3  | 12    | 20  | 9      |
| 4  | 28    | 28  | 1      |
| 5  | 33    | 33  | 1      |
| 6  | 36    | 36  | 1      |
| 7  | 38    | 38  | 1      |
| 8  | 42    | 42  | 1      |
| 9  | 45    | 49  | 5      |
| 10 | 55    | 73  | 19     |
| 11 | 88    | 98  | 11     |
| 12 | 100   | 101 | 2      |
| 13 | 103   | 103 | 1      |
| 14 | 105   | 106 | 2      |
| 15 | 109   | 109 | 1      |
| 16 | 113   | 113 | 1      |
| 17 | 115   | 115 | 1      |
| 18 | 117   | 117 | 1      |
| 19 | 122   | 123 | 2      |
| 20 | 126   | 126 | 1      |
| 21 | 135   | 135 | 1      |
| 22 | 140   | 140 | 1      |
| 23 | 148   | 148 | 1      |
| 24 | 150   | 165 | 16     |
| 25 | 175   | 176 | 2      |
| 26 | 178   | 178 | 1      |
| 27 | 180   | 180 | 1      |
| 28 | 182   | 182 | 1      |

Supplementary Text 2

|    |     |     |   |
|----|-----|-----|---|
| 29 | 189 | 189 | 1 |
| 30 | 214 | 221 | 8 |
| 31 | 234 | 234 | 1 |
| 32 | 251 | 252 | 2 |
| 33 | 256 | 256 | 1 |
| 34 | 259 | 263 | 5 |
| 35 | 311 | 311 | 1 |
| 36 | 313 | 314 | 2 |
| 37 | 318 | 324 | 7 |
| 38 | 327 | 327 | 1 |
| 39 | 329 | 331 | 3 |
| 40 | 333 | 333 | 1 |
| 41 | 352 | 352 | 1 |
| 42 | 356 | 356 | 1 |
| 43 | 358 | 360 | 3 |
| 44 | 362 | 364 | 3 |
| 45 | 366 | 369 | 4 |
| 46 | 378 | 378 | 1 |
| 47 | 381 | 381 | 1 |
| 48 | 383 | 383 | 1 |
| 49 | 385 | 386 | 2 |
| 50 | 388 | 388 | 1 |
| 51 | 412 | 412 | 1 |
| 52 | 414 | 418 | 5 |
| 53 | 420 | 421 | 2 |
| 54 | 428 | 428 | 1 |
| 55 | 438 | 440 | 3 |
| 56 | 442 | 449 | 8 |
| 57 | 504 | 504 | 1 |

# 163 positions (cumulative volume <= 23 Angstrom^3)

|    | start | end | length |
|----|-------|-----|--------|
| 1  | 1     | 1   | 1      |
| 2  | 8     | 10  | 3      |
| 3  | 12    | 20  | 9      |
| 4  | 28    | 28  | 1      |
| 5  | 33    | 33  | 1      |
| 6  | 36    | 36  | 1      |
| 7  | 38    | 38  | 1      |
| 8  | 42    | 42  | 1      |
| 9  | 45    | 49  | 5      |
| 10 | 55    | 74  | 20     |
| 11 | 88    | 98  | 11     |
| 12 | 100   | 101 | 2      |
| 13 | 103   | 103 | 1      |
| 14 | 105   | 106 | 2      |
| 15 | 109   | 109 | 1      |
| 16 | 113   | 113 | 1      |
| 17 | 115   | 115 | 1      |
| 18 | 117   | 117 | 1      |
| 19 | 122   | 123 | 2      |

Supplementary Text 2

|    |     |     |    |
|----|-----|-----|----|
| 20 | 126 | 126 | 1  |
| 21 | 135 | 135 | 1  |
| 22 | 140 | 140 | 1  |
| 23 | 148 | 148 | 1  |
| 24 | 150 | 165 | 16 |
| 25 | 175 | 176 | 2  |
| 26 | 178 | 178 | 1  |
| 27 | 180 | 180 | 1  |
| 28 | 182 | 182 | 1  |
| 29 | 189 | 189 | 1  |
| 30 | 214 | 221 | 8  |
| 31 | 234 | 234 | 1  |
| 32 | 251 | 252 | 2  |
| 33 | 256 | 256 | 1  |
| 34 | 259 | 263 | 5  |
| 35 | 289 | 289 | 1  |
| 36 | 311 | 311 | 1  |
| 37 | 313 | 314 | 2  |
| 38 | 318 | 324 | 7  |
| 39 | 327 | 327 | 1  |
| 40 | 329 | 331 | 3  |
| 41 | 333 | 333 | 1  |
| 42 | 352 | 352 | 1  |
| 43 | 356 | 356 | 1  |
| 44 | 358 | 360 | 3  |
| 45 | 362 | 364 | 3  |
| 46 | 366 | 369 | 4  |
| 47 | 378 | 378 | 1  |
| 48 | 381 | 381 | 1  |
| 49 | 383 | 383 | 1  |
| 50 | 385 | 386 | 2  |
| 51 | 388 | 388 | 1  |
| 52 | 412 | 412 | 1  |
| 53 | 414 | 418 | 5  |
| 54 | 420 | 421 | 2  |
| 55 | 428 | 428 | 1  |
| 56 | 438 | 440 | 3  |
| 57 | 442 | 449 | 8  |
| 58 | 504 | 504 | 1  |

# 165 positions (cumulative volume <= 24 Angstrom^3)

|   | start | end | length |
|---|-------|-----|--------|
| 1 | 1     | 1   | 1      |
| 2 | 8     | 10  | 3      |
| 3 | 12    | 20  | 9      |
| 4 | 28    | 28  | 1      |
| 5 | 33    | 33  | 1      |
| 6 | 36    | 36  | 1      |
| 7 | 38    | 38  | 1      |
| 8 | 42    | 42  | 1      |
| 9 | 45    | 49  | 5      |

Supplementary Text 2

|    |     |     |    |
|----|-----|-----|----|
| 10 | 55  | 74  | 20 |
| 11 | 78  | 78  | 1  |
| 12 | 88  | 98  | 11 |
| 13 | 100 | 101 | 2  |
| 14 | 103 | 103 | 1  |
| 15 | 105 | 106 | 2  |
| 16 | 109 | 109 | 1  |
| 17 | 113 | 113 | 1  |
| 18 | 115 | 115 | 1  |
| 19 | 117 | 117 | 1  |
| 20 | 122 | 123 | 2  |
| 21 | 126 | 126 | 1  |
| 22 | 135 | 135 | 1  |
| 23 | 140 | 140 | 1  |
| 24 | 148 | 148 | 1  |
| 25 | 150 | 165 | 16 |
| 26 | 175 | 176 | 2  |
| 27 | 178 | 178 | 1  |
| 28 | 180 | 180 | 1  |
| 29 | 182 | 182 | 1  |
| 30 | 189 | 189 | 1  |
| 31 | 214 | 221 | 8  |
| 32 | 234 | 234 | 1  |
| 33 | 251 | 253 | 3  |
| 34 | 256 | 256 | 1  |
| 35 | 259 | 263 | 5  |
| 36 | 289 | 289 | 1  |
| 37 | 311 | 311 | 1  |
| 38 | 313 | 314 | 2  |
| 39 | 318 | 324 | 7  |
| 40 | 327 | 327 | 1  |
| 41 | 329 | 331 | 3  |
| 42 | 333 | 333 | 1  |
| 43 | 352 | 352 | 1  |
| 44 | 356 | 356 | 1  |
| 45 | 358 | 360 | 3  |
| 46 | 362 | 364 | 3  |
| 47 | 366 | 369 | 4  |
| 48 | 378 | 378 | 1  |
| 49 | 381 | 381 | 1  |
| 50 | 383 | 383 | 1  |
| 51 | 385 | 386 | 2  |
| 52 | 388 | 388 | 1  |
| 53 | 412 | 412 | 1  |
| 54 | 414 | 418 | 5  |
| 55 | 420 | 421 | 2  |
| 56 | 428 | 428 | 1  |
| 57 | 438 | 440 | 3  |
| 58 | 442 | 449 | 8  |
| 59 | 504 | 504 | 1  |

Supplementary Text 2

# 167 positions (cumulative volume <= 25 Angstrom^3)

|    | start | end | length |
|----|-------|-----|--------|
| 1  | 1     | 1   | 1      |
| 2  | 8     | 10  | 3      |
| 3  | 12    | 20  | 9      |
| 4  | 28    | 28  | 1      |
| 5  | 33    | 33  | 1      |
| 6  | 36    | 36  | 1      |
| 7  | 38    | 38  | 1      |
| 8  | 42    | 42  | 1      |
| 9  | 45    | 49  | 5      |
| 10 | 55    | 74  | 20     |
| 11 | 78    | 78  | 1      |
| 12 | 86    | 86  | 1      |
| 13 | 88    | 98  | 11     |
| 14 | 100   | 101 | 2      |
| 15 | 103   | 103 | 1      |
| 16 | 105   | 106 | 2      |
| 17 | 109   | 109 | 1      |
| 18 | 112   | 113 | 2      |
| 19 | 115   | 115 | 1      |
| 20 | 117   | 117 | 1      |
| 21 | 122   | 123 | 2      |
| 22 | 126   | 126 | 1      |
| 23 | 135   | 135 | 1      |
| 24 | 140   | 140 | 1      |
| 25 | 148   | 148 | 1      |
| 26 | 150   | 165 | 16     |
| 27 | 175   | 176 | 2      |
| 28 | 178   | 178 | 1      |
| 29 | 180   | 180 | 1      |
| 30 | 182   | 182 | 1      |
| 31 | 189   | 189 | 1      |
| 32 | 214   | 221 | 8      |
| 33 | 234   | 234 | 1      |
| 34 | 251   | 253 | 3      |
| 35 | 256   | 256 | 1      |
| 36 | 259   | 263 | 5      |
| 37 | 289   | 289 | 1      |
| 38 | 311   | 311 | 1      |
| 39 | 313   | 314 | 2      |
| 40 | 318   | 324 | 7      |
| 41 | 327   | 327 | 1      |
| 42 | 329   | 331 | 3      |
| 43 | 333   | 333 | 1      |
| 44 | 352   | 352 | 1      |
| 45 | 356   | 356 | 1      |
| 46 | 358   | 360 | 3      |
| 47 | 362   | 364 | 3      |
| 48 | 366   | 369 | 4      |



Supplementary Text 2

|    |     |     |   |
|----|-----|-----|---|
| 49 | 378 | 378 | 1 |
| 50 | 381 | 381 | 1 |
| 51 | 383 | 383 | 1 |
| 52 | 385 | 386 | 2 |
| 53 | 388 | 388 | 1 |
| 54 | 412 | 412 | 1 |
| 55 | 414 | 418 | 5 |
| 56 | 420 | 421 | 2 |
| 57 | 428 | 428 | 1 |
| 58 | 438 | 440 | 3 |
| 59 | 442 | 449 | 8 |
| 60 | 504 | 504 | 1 |

# 170 positions (cumulative volume <= 26 Angstrom^3)

|    | start | end | length |
|----|-------|-----|--------|
| 1  | 1     | 1   | 1      |
| 2  | 8     | 10  | 3      |
| 3  | 12    | 20  | 9      |
| 4  | 28    | 28  | 1      |
| 5  | 33    | 33  | 1      |
| 6  | 36    | 36  | 1      |
| 7  | 38    | 38  | 1      |
| 8  | 42    | 42  | 1      |
| 9  | 45    | 49  | 5      |
| 10 | 55    | 74  | 20     |
| 11 | 78    | 78  | 1      |
| 12 | 86    | 86  | 1      |
| 13 | 88    | 98  | 11     |
| 14 | 100   | 101 | 2      |
| 15 | 103   | 106 | 4      |
| 16 | 109   | 109 | 1      |
| 17 | 112   | 113 | 2      |
| 18 | 115   | 115 | 1      |
| 19 | 117   | 117 | 1      |
| 20 | 122   | 123 | 2      |
| 21 | 126   | 126 | 1      |
| 22 | 135   | 135 | 1      |
| 23 | 140   | 140 | 1      |
| 24 | 148   | 148 | 1      |
| 25 | 150   | 165 | 16     |
| 26 | 175   | 176 | 2      |
| 27 | 178   | 178 | 1      |
| 28 | 180   | 180 | 1      |
| 29 | 182   | 182 | 1      |
| 30 | 189   | 189 | 1      |
| 31 | 214   | 221 | 8      |
| 32 | 234   | 234 | 1      |
| 33 | 251   | 253 | 3      |
| 34 | 256   | 256 | 1      |
| 35 | 259   | 263 | 5      |
| 36 | 289   | 289 | 1      |

Supplementary Text 2

|    |     |     |    |
|----|-----|-----|----|
| 37 | 311 | 311 | 1  |
| 38 | 313 | 314 | 2  |
| 39 | 318 | 324 | 7  |
| 40 | 326 | 327 | 2  |
| 41 | 329 | 331 | 3  |
| 42 | 333 | 333 | 1  |
| 43 | 352 | 352 | 1  |
| 44 | 356 | 356 | 1  |
| 45 | 358 | 360 | 3  |
| 46 | 362 | 364 | 3  |
| 47 | 366 | 369 | 4  |
| 48 | 378 | 378 | 1  |
| 49 | 381 | 381 | 1  |
| 50 | 383 | 383 | 1  |
| 51 | 385 | 386 | 2  |
| 52 | 388 | 388 | 1  |
| 53 | 412 | 412 | 1  |
| 54 | 414 | 418 | 5  |
| 55 | 420 | 421 | 2  |
| 56 | 428 | 428 | 1  |
| 57 | 438 | 449 | 12 |
| 58 | 504 | 504 | 1  |

# 171 positions (cumulative volume <= 27 Angstrom^3)

|    | start | end | length |
|----|-------|-----|--------|
| 1  | 1     | 1   | 1      |
| 2  | 8     | 10  | 3      |
| 3  | 12    | 20  | 9      |
| 4  | 28    | 28  | 1      |
| 5  | 33    | 33  | 1      |
| 6  | 36    | 36  | 1      |
| 7  | 38    | 38  | 1      |
| 8  | 42    | 42  | 1      |
| 9  | 45    | 49  | 5      |
| 10 | 55    | 74  | 20     |
| 11 | 78    | 78  | 1      |
| 12 | 86    | 86  | 1      |
| 13 | 88    | 98  | 11     |
| 14 | 100   | 101 | 2      |
| 15 | 103   | 106 | 4      |
| 16 | 109   | 109 | 1      |
| 17 | 112   | 113 | 2      |
| 18 | 115   | 115 | 1      |
| 19 | 117   | 117 | 1      |
| 20 | 122   | 123 | 2      |
| 21 | 126   | 126 | 1      |
| 22 | 135   | 135 | 1      |
| 23 | 140   | 140 | 1      |
| 24 | 148   | 148 | 1      |
| 25 | 150   | 165 | 16     |
| 26 | 175   | 176 | 2      |

Supplementary Text 2

|    |     |     |    |
|----|-----|-----|----|
| 27 | 178 | 178 | 1  |
| 28 | 180 | 180 | 1  |
| 29 | 182 | 182 | 1  |
| 30 | 189 | 189 | 1  |
| 31 | 214 | 221 | 8  |
| 32 | 234 | 234 | 1  |
| 33 | 251 | 253 | 3  |
| 34 | 256 | 256 | 1  |
| 35 | 259 | 263 | 5  |
| 36 | 289 | 289 | 1  |
| 37 | 311 | 311 | 1  |
| 38 | 313 | 314 | 2  |
| 39 | 318 | 324 | 7  |
| 40 | 326 | 327 | 2  |
| 41 | 329 | 331 | 3  |
| 42 | 333 | 333 | 1  |
| 43 | 352 | 352 | 1  |
| 44 | 356 | 356 | 1  |
| 45 | 358 | 360 | 3  |
| 46 | 362 | 364 | 3  |
| 47 | 366 | 369 | 4  |
| 48 | 378 | 379 | 2  |
| 49 | 381 | 381 | 1  |
| 50 | 383 | 383 | 1  |
| 51 | 385 | 386 | 2  |
| 52 | 388 | 388 | 1  |
| 53 | 412 | 412 | 1  |
| 54 | 414 | 418 | 5  |
| 55 | 420 | 421 | 2  |
| 56 | 428 | 428 | 1  |
| 57 | 438 | 449 | 12 |
| 58 | 504 | 504 | 1  |

# 173 positions (cumulative volume <= 28 Angstrom^3)

|    | start | end | length |
|----|-------|-----|--------|
| 1  | 1     | 1   | 1      |
| 2  | 8     | 10  | 3      |
| 3  | 12    | 20  | 9      |
| 4  | 28    | 28  | 1      |
| 5  | 33    | 33  | 1      |
| 6  | 36    | 36  | 1      |
| 7  | 38    | 38  | 1      |
| 8  | 42    | 42  | 1      |
| 9  | 45    | 50  | 6      |
| 10 | 55    | 74  | 20     |
| 11 | 78    | 78  | 1      |
| 12 | 86    | 86  | 1      |
| 13 | 88    | 98  | 11     |
| 14 | 100   | 101 | 2      |
| 15 | 103   | 106 | 4      |
| 16 | 109   | 109 | 1      |

Supplementary Text 2

|    |     |     |    |
|----|-----|-----|----|
| 17 | 112 | 113 | 2  |
| 18 | 115 | 115 | 1  |
| 19 | 117 | 117 | 1  |
| 20 | 122 | 123 | 2  |
| 21 | 126 | 126 | 1  |
| 22 | 135 | 135 | 1  |
| 23 | 140 | 140 | 1  |
| 24 | 148 | 148 | 1  |
| 25 | 150 | 165 | 16 |
| 26 | 175 | 176 | 2  |
| 27 | 178 | 178 | 1  |
| 28 | 180 | 180 | 1  |
| 29 | 182 | 182 | 1  |
| 30 | 189 | 189 | 1  |
| 31 | 214 | 221 | 8  |
| 32 | 234 | 234 | 1  |
| 33 | 251 | 253 | 3  |
| 34 | 256 | 257 | 2  |
| 35 | 259 | 263 | 5  |
| 36 | 289 | 289 | 1  |
| 37 | 311 | 311 | 1  |
| 38 | 313 | 314 | 2  |
| 39 | 318 | 324 | 7  |
| 40 | 326 | 327 | 2  |
| 41 | 329 | 331 | 3  |
| 42 | 333 | 333 | 1  |
| 43 | 352 | 352 | 1  |
| 44 | 356 | 356 | 1  |
| 45 | 358 | 360 | 3  |
| 46 | 362 | 364 | 3  |
| 47 | 366 | 369 | 4  |
| 48 | 378 | 379 | 2  |
| 49 | 381 | 381 | 1  |
| 50 | 383 | 383 | 1  |
| 51 | 385 | 386 | 2  |
| 52 | 388 | 388 | 1  |
| 53 | 412 | 412 | 1  |
| 54 | 414 | 418 | 5  |
| 55 | 420 | 421 | 2  |
| 56 | 428 | 428 | 1  |
| 57 | 438 | 449 | 12 |
| 58 | 504 | 504 | 1  |

# 175 positions (cumulative volume <= 29 Angstrom^3)

|   | start | end | length |
|---|-------|-----|--------|
| 1 | 1     | 1   | 1      |
| 2 | 8     | 10  | 3      |
| 3 | 12    | 20  | 9      |
| 4 | 28    | 28  | 1      |
| 5 | 33    | 33  | 1      |
| 6 | 36    | 36  | 1      |

Supplementary Text 2

|    |     |     |    |
|----|-----|-----|----|
| 7  | 38  | 38  | 1  |
| 8  | 42  | 42  | 1  |
| 9  | 45  | 50  | 6  |
| 10 | 55  | 74  | 20 |
| 11 | 78  | 78  | 1  |
| 12 | 86  | 86  | 1  |
| 13 | 88  | 98  | 11 |
| 14 | 100 | 101 | 2  |
| 15 | 103 | 106 | 4  |
| 16 | 109 | 109 | 1  |
| 17 | 112 | 113 | 2  |
| 18 | 115 | 115 | 1  |
| 19 | 117 | 117 | 1  |
| 20 | 121 | 123 | 3  |
| 21 | 126 | 126 | 1  |
| 22 | 135 | 135 | 1  |
| 23 | 140 | 140 | 1  |
| 24 | 148 | 148 | 1  |
| 25 | 150 | 165 | 16 |
| 26 | 175 | 176 | 2  |
| 27 | 178 | 178 | 1  |
| 28 | 180 | 180 | 1  |
| 29 | 182 | 182 | 1  |
| 30 | 189 | 189 | 1  |
| 31 | 214 | 221 | 8  |
| 32 | 234 | 234 | 1  |
| 33 | 251 | 253 | 3  |
| 34 | 256 | 257 | 2  |
| 35 | 259 | 263 | 5  |
| 36 | 289 | 289 | 1  |
| 37 | 311 | 311 | 1  |
| 38 | 313 | 314 | 2  |
| 39 | 318 | 324 | 7  |
| 40 | 326 | 327 | 2  |
| 41 | 329 | 331 | 3  |
| 42 | 333 | 333 | 1  |
| 43 | 352 | 352 | 1  |
| 44 | 356 | 356 | 1  |
| 45 | 358 | 360 | 3  |
| 46 | 362 | 364 | 3  |
| 47 | 366 | 369 | 4  |
| 48 | 377 | 379 | 3  |
| 49 | 381 | 381 | 1  |
| 50 | 383 | 383 | 1  |
| 51 | 385 | 386 | 2  |
| 52 | 388 | 388 | 1  |
| 53 | 412 | 412 | 1  |
| 54 | 414 | 418 | 5  |
| 55 | 420 | 421 | 2  |
| 56 | 428 | 428 | 1  |

Supplementary Text 2

```

57  438 449    12
58  504 504     1
# 177 positions (cumulative volume <= 30 Angstrom^3)
  start end length
1     1   1     1
2     8  10     3
3    12  20     9
4    28  28     1
5    33  33     1
6    36  36     1
7    38  38     1
8    42  42     1
9    45  50     6
10   55  74    20
11   78  78     1
12   86  86     1
13   88  98    11
14  100 101     2
15  103 106     4
16  109 109     1
17  112 113     2
18  115 115     1
19  117 117     1
20  121 123     3
21  126 126     1
22  135 135     1
23  140 140     1
24  148 148     1
25  150 165    16
26  175 176     2
27  178 178     1
28  180 180     1
29  182 182     1
30  189 189     1
31  214 221     8
32  234 234     1
33  251 253     3
34  256 257     2
35  259 263     5
36  289 289     1
37  311 311     1
38  313 314     2
39  318 327    10
40  329 331     3
41  333 333     1
42  352 352     1
43  356 356     1
44  358 360     3
45  362 364     3
46  366 369     4

```

Supplementary Text 2

|                                                      |       |     |        |
|------------------------------------------------------|-------|-----|--------|
| 47                                                   | 377   | 379 | 3      |
| 48                                                   | 381   | 381 | 1      |
| 49                                                   | 383   | 383 | 1      |
| 50                                                   | 385   | 386 | 2      |
| 51                                                   | 388   | 388 | 1      |
| 52                                                   | 412   | 412 | 1      |
| 53                                                   | 414   | 421 | 8      |
| 54                                                   | 428   | 428 | 1      |
| 55                                                   | 438   | 449 | 12     |
| 56                                                   | 504   | 504 | 1      |
| # 179 positions (cumulative volume <= 31 Angstrom^3) |       |     |        |
|                                                      | start | end | length |
| 1                                                    | 1     | 1   | 1      |
| 2                                                    | 8     | 10  | 3      |
| 3                                                    | 12    | 20  | 9      |
| 4                                                    | 28    | 28  | 1      |
| 5                                                    | 33    | 33  | 1      |
| 6                                                    | 36    | 36  | 1      |
| 7                                                    | 38    | 38  | 1      |
| 8                                                    | 42    | 42  | 1      |
| 9                                                    | 45    | 50  | 6      |
| 10                                                   | 55    | 74  | 20     |
| 11                                                   | 78    | 78  | 1      |
| 12                                                   | 84    | 84  | 1      |
| 13                                                   | 86    | 86  | 1      |
| 14                                                   | 88    | 98  | 11     |
| 15                                                   | 100   | 101 | 2      |
| 16                                                   | 103   | 106 | 4      |
| 17                                                   | 109   | 109 | 1      |
| 18                                                   | 112   | 113 | 2      |
| 19                                                   | 115   | 115 | 1      |
| 20                                                   | 117   | 117 | 1      |
| 21                                                   | 121   | 123 | 3      |
| 22                                                   | 126   | 126 | 1      |
| 23                                                   | 135   | 135 | 1      |
| 24                                                   | 140   | 140 | 1      |
| 25                                                   | 148   | 148 | 1      |
| 26                                                   | 150   | 165 | 16     |
| 27                                                   | 175   | 176 | 2      |
| 28                                                   | 178   | 178 | 1      |
| 29                                                   | 180   | 180 | 1      |
| 30                                                   | 182   | 182 | 1      |
| 31                                                   | 189   | 189 | 1      |
| 32                                                   | 214   | 221 | 8      |
| 33                                                   | 234   | 234 | 1      |
| 34                                                   | 251   | 253 | 3      |
| 35                                                   | 256   | 257 | 2      |
| 36                                                   | 259   | 264 | 6      |
| 37                                                   | 289   | 289 | 1      |
| 38                                                   | 311   | 311 | 1      |

Supplementary Text 2

|    |     |     |    |
|----|-----|-----|----|
| 39 | 313 | 314 | 2  |
| 40 | 318 | 327 | 10 |
| 41 | 329 | 331 | 3  |
| 42 | 333 | 333 | 1  |
| 43 | 352 | 352 | 1  |
| 44 | 356 | 356 | 1  |
| 45 | 358 | 360 | 3  |
| 46 | 362 | 364 | 3  |
| 47 | 366 | 369 | 4  |
| 48 | 377 | 379 | 3  |
| 49 | 381 | 381 | 1  |
| 50 | 383 | 383 | 1  |
| 51 | 385 | 386 | 2  |
| 52 | 388 | 388 | 1  |
| 53 | 412 | 412 | 1  |
| 54 | 414 | 421 | 8  |
| 55 | 428 | 428 | 1  |
| 56 | 438 | 449 | 12 |
| 57 | 504 | 504 | 1  |

# 181 positions (cumulative volume <= 32 Angstrom^3)

|    | start | end | length |
|----|-------|-----|--------|
| 1  | 1     | 1   | 1      |
| 2  | 8     | 20  | 13     |
| 3  | 28    | 28  | 1      |
| 4  | 33    | 33  | 1      |
| 5  | 36    | 36  | 1      |
| 6  | 38    | 38  | 1      |
| 7  | 42    | 42  | 1      |
| 8  | 45    | 50  | 6      |
| 9  | 55    | 74  | 20     |
| 10 | 78    | 78  | 1      |
| 11 | 84    | 84  | 1      |
| 12 | 86    | 86  | 1      |
| 13 | 88    | 98  | 11     |
| 14 | 100   | 101 | 2      |
| 15 | 103   | 106 | 4      |
| 16 | 109   | 109 | 1      |
| 17 | 112   | 113 | 2      |
| 18 | 115   | 115 | 1      |
| 19 | 117   | 117 | 1      |
| 20 | 121   | 123 | 3      |
| 21 | 126   | 126 | 1      |
| 22 | 135   | 135 | 1      |
| 23 | 140   | 140 | 1      |
| 24 | 148   | 148 | 1      |
| 25 | 150   | 165 | 16     |
| 26 | 175   | 176 | 2      |
| 27 | 178   | 178 | 1      |
| 28 | 180   | 180 | 1      |
| 29 | 182   | 182 | 1      |



Supplementary Text 2

|    |     |     |    |
|----|-----|-----|----|
| 30 | 189 | 189 | 1  |
| 31 | 214 | 221 | 8  |
| 32 | 234 | 234 | 1  |
| 33 | 251 | 253 | 3  |
| 34 | 256 | 257 | 2  |
| 35 | 259 | 264 | 6  |
| 36 | 289 | 289 | 1  |
| 37 | 311 | 311 | 1  |
| 38 | 313 | 314 | 2  |
| 39 | 318 | 327 | 10 |
| 40 | 329 | 331 | 3  |
| 41 | 333 | 333 | 1  |
| 42 | 352 | 352 | 1  |
| 43 | 356 | 356 | 1  |
| 44 | 358 | 360 | 3  |
| 45 | 362 | 364 | 3  |
| 46 | 366 | 369 | 4  |
| 47 | 377 | 379 | 3  |
| 48 | 381 | 381 | 1  |
| 49 | 383 | 383 | 1  |
| 50 | 385 | 386 | 2  |
| 51 | 388 | 388 | 1  |
| 52 | 412 | 412 | 1  |
| 53 | 414 | 421 | 8  |
| 54 | 428 | 428 | 1  |
| 55 | 437 | 449 | 13 |
| 56 | 504 | 504 | 1  |

# 183 positions (cumulative volume <= 33 Angstrom^3)

|    | start | end | length |
|----|-------|-----|--------|
| 1  | 1     | 1   | 1      |
| 2  | 3     | 3   | 1      |
| 3  | 8     | 20  | 13     |
| 4  | 28    | 28  | 1      |
| 5  | 33    | 33  | 1      |
| 6  | 36    | 36  | 1      |
| 7  | 38    | 38  | 1      |
| 8  | 42    | 42  | 1      |
| 9  | 45    | 50  | 6      |
| 10 | 55    | 74  | 20     |
| 11 | 78    | 78  | 1      |
| 12 | 84    | 84  | 1      |
| 13 | 86    | 86  | 1      |
| 14 | 88    | 98  | 11     |
| 15 | 100   | 101 | 2      |
| 16 | 103   | 106 | 4      |
| 17 | 109   | 109 | 1      |
| 18 | 112   | 113 | 2      |
| 19 | 115   | 115 | 1      |
| 20 | 117   | 117 | 1      |
| 21 | 121   | 123 | 3      |

Supplementary Text 2

|    |     |     |    |
|----|-----|-----|----|
| 22 | 126 | 126 | 1  |
| 23 | 135 | 135 | 1  |
| 24 | 140 | 140 | 1  |
| 25 | 148 | 148 | 1  |
| 26 | 150 | 165 | 16 |
| 27 | 167 | 167 | 1  |
| 28 | 175 | 176 | 2  |
| 29 | 178 | 178 | 1  |
| 30 | 180 | 180 | 1  |
| 31 | 182 | 182 | 1  |
| 32 | 189 | 189 | 1  |
| 33 | 214 | 221 | 8  |
| 34 | 234 | 234 | 1  |
| 35 | 251 | 253 | 3  |
| 36 | 256 | 257 | 2  |
| 37 | 259 | 264 | 6  |
| 38 | 289 | 289 | 1  |
| 39 | 311 | 311 | 1  |
| 40 | 313 | 314 | 2  |
| 41 | 318 | 327 | 10 |
| 42 | 329 | 331 | 3  |
| 43 | 333 | 333 | 1  |
| 44 | 352 | 352 | 1  |
| 45 | 356 | 356 | 1  |
| 46 | 358 | 360 | 3  |
| 47 | 362 | 364 | 3  |
| 48 | 366 | 369 | 4  |
| 49 | 377 | 379 | 3  |
| 50 | 381 | 381 | 1  |
| 51 | 383 | 383 | 1  |
| 52 | 385 | 386 | 2  |
| 53 | 388 | 388 | 1  |
| 54 | 412 | 412 | 1  |
| 55 | 414 | 421 | 8  |
| 56 | 428 | 428 | 1  |
| 57 | 437 | 449 | 13 |
| 58 | 504 | 504 | 1  |

# 185 positions (cumulative volume <= 34 Angstrom^3)

|    | start | end | length |
|----|-------|-----|--------|
| 1  | 1     | 1   | 1      |
| 2  | 3     | 3   | 1      |
| 3  | 8     | 20  | 13     |
| 4  | 28    | 28  | 1      |
| 5  | 33    | 33  | 1      |
| 6  | 36    | 36  | 1      |
| 7  | 38    | 38  | 1      |
| 8  | 42    | 42  | 1      |
| 9  | 44    | 50  | 7      |
| 10 | 55    | 74  | 20     |
| 11 | 78    | 78  | 1      |

Supplementary Text 2

|    |     |     |    |
|----|-----|-----|----|
| 12 | 84  | 84  | 1  |
| 13 | 86  | 86  | 1  |
| 14 | 88  | 98  | 11 |
| 15 | 100 | 101 | 2  |
| 16 | 103 | 106 | 4  |
| 17 | 109 | 109 | 1  |
| 18 | 112 | 113 | 2  |
| 19 | 115 | 115 | 1  |
| 20 | 117 | 117 | 1  |
| 21 | 121 | 123 | 3  |
| 22 | 126 | 126 | 1  |
| 23 | 135 | 135 | 1  |
| 24 | 139 | 140 | 2  |
| 25 | 148 | 148 | 1  |
| 26 | 150 | 165 | 16 |
| 27 | 167 | 167 | 1  |
| 28 | 175 | 176 | 2  |
| 29 | 178 | 178 | 1  |
| 30 | 180 | 180 | 1  |
| 31 | 182 | 182 | 1  |
| 32 | 189 | 189 | 1  |
| 33 | 214 | 221 | 8  |
| 34 | 234 | 234 | 1  |
| 35 | 251 | 253 | 3  |
| 36 | 256 | 257 | 2  |
| 37 | 259 | 264 | 6  |
| 38 | 289 | 289 | 1  |
| 39 | 311 | 311 | 1  |
| 40 | 313 | 314 | 2  |
| 41 | 318 | 327 | 10 |
| 42 | 329 | 331 | 3  |
| 43 | 333 | 333 | 1  |
| 44 | 352 | 352 | 1  |
| 45 | 356 | 356 | 1  |
| 46 | 358 | 360 | 3  |
| 47 | 362 | 364 | 3  |
| 48 | 366 | 369 | 4  |
| 49 | 377 | 379 | 3  |
| 50 | 381 | 381 | 1  |
| 51 | 383 | 383 | 1  |
| 52 | 385 | 386 | 2  |
| 53 | 388 | 388 | 1  |
| 54 | 412 | 412 | 1  |
| 55 | 414 | 421 | 8  |
| 56 | 428 | 428 | 1  |
| 57 | 437 | 449 | 13 |
| 58 | 504 | 504 | 1  |

# 186 positions (cumulative volume <= 35 Angstrom^3)

|   | start | end | length |
|---|-------|-----|--------|
| 1 | 1     | 1   | 1      |

Supplementary Text 2

|    |     |     |    |
|----|-----|-----|----|
| 2  | 3   | 3   | 1  |
| 3  | 8   | 20  | 13 |
| 4  | 28  | 28  | 1  |
| 5  | 33  | 33  | 1  |
| 6  | 36  | 36  | 1  |
| 7  | 38  | 38  | 1  |
| 8  | 42  | 42  | 1  |
| 9  | 44  | 50  | 7  |
| 10 | 55  | 74  | 20 |
| 11 | 78  | 78  | 1  |
| 12 | 84  | 84  | 1  |
| 13 | 86  | 86  | 1  |
| 14 | 88  | 98  | 11 |
| 15 | 100 | 101 | 2  |
| 16 | 103 | 106 | 4  |
| 17 | 109 | 109 | 1  |
| 18 | 112 | 113 | 2  |
| 19 | 115 | 115 | 1  |
| 20 | 117 | 117 | 1  |
| 21 | 121 | 123 | 3  |
| 22 | 126 | 126 | 1  |
| 23 | 135 | 135 | 1  |
| 24 | 139 | 140 | 2  |
| 25 | 148 | 148 | 1  |
| 26 | 150 | 165 | 16 |
| 27 | 167 | 167 | 1  |
| 28 | 175 | 176 | 2  |
| 29 | 178 | 178 | 1  |
| 30 | 180 | 180 | 1  |
| 31 | 182 | 182 | 1  |
| 32 | 189 | 189 | 1  |
| 33 | 214 | 221 | 8  |
| 34 | 234 | 234 | 1  |
| 35 | 240 | 240 | 1  |
| 36 | 251 | 253 | 3  |
| 37 | 256 | 257 | 2  |
| 38 | 259 | 264 | 6  |
| 39 | 289 | 289 | 1  |
| 40 | 311 | 311 | 1  |
| 41 | 313 | 314 | 2  |
| 42 | 318 | 327 | 10 |
| 43 | 329 | 331 | 3  |
| 44 | 333 | 333 | 1  |
| 45 | 352 | 352 | 1  |
| 46 | 356 | 356 | 1  |
| 47 | 358 | 360 | 3  |
| 48 | 362 | 364 | 3  |
| 49 | 366 | 369 | 4  |
| 50 | 377 | 379 | 3  |
| 51 | 381 | 381 | 1  |

Supplementary Text 2

|                                                      |       |     |        |
|------------------------------------------------------|-------|-----|--------|
| 52                                                   | 383   | 383 | 1      |
| 53                                                   | 385   | 386 | 2      |
| 54                                                   | 388   | 388 | 1      |
| 55                                                   | 412   | 412 | 1      |
| 56                                                   | 414   | 421 | 8      |
| 57                                                   | 428   | 428 | 1      |
| 58                                                   | 437   | 449 | 13     |
| 59                                                   | 504   | 504 | 1      |
| # 187 positions (cumulative volume <= 36 Angstrom^3) |       |     |        |
|                                                      | start | end | length |
| 1                                                    | 1     | 1   | 1      |
| 2                                                    | 3     | 3   | 1      |
| 3                                                    | 8     | 20  | 13     |
| 4                                                    | 28    | 28  | 1      |
| 5                                                    | 33    | 33  | 1      |
| 6                                                    | 36    | 36  | 1      |
| 7                                                    | 38    | 38  | 1      |
| 8                                                    | 42    | 42  | 1      |
| 9                                                    | 44    | 50  | 7      |
| 10                                                   | 55    | 74  | 20     |
| 11                                                   | 78    | 78  | 1      |
| 12                                                   | 84    | 84  | 1      |
| 13                                                   | 86    | 86  | 1      |
| 14                                                   | 88    | 98  | 11     |
| 15                                                   | 100   | 101 | 2      |
| 16                                                   | 103   | 106 | 4      |
| 17                                                   | 109   | 109 | 1      |
| 18                                                   | 112   | 113 | 2      |
| 19                                                   | 115   | 115 | 1      |
| 20                                                   | 117   | 117 | 1      |
| 21                                                   | 121   | 123 | 3      |
| 22                                                   | 126   | 126 | 1      |
| 23                                                   | 135   | 135 | 1      |
| 24                                                   | 139   | 140 | 2      |
| 25                                                   | 148   | 148 | 1      |
| 26                                                   | 150   | 165 | 16     |
| 27                                                   | 167   | 167 | 1      |
| 28                                                   | 175   | 178 | 4      |
| 29                                                   | 180   | 180 | 1      |
| 30                                                   | 182   | 182 | 1      |
| 31                                                   | 189   | 189 | 1      |
| 32                                                   | 214   | 221 | 8      |
| 33                                                   | 234   | 234 | 1      |
| 34                                                   | 240   | 240 | 1      |
| 35                                                   | 251   | 253 | 3      |
| 36                                                   | 256   | 257 | 2      |
| 37                                                   | 259   | 264 | 6      |
| 38                                                   | 289   | 289 | 1      |
| 39                                                   | 311   | 311 | 1      |
| 40                                                   | 313   | 314 | 2      |

Supplementary Text 2

|    |     |     |    |
|----|-----|-----|----|
| 41 | 318 | 327 | 10 |
| 42 | 329 | 331 | 3  |
| 43 | 333 | 333 | 1  |
| 44 | 352 | 352 | 1  |
| 45 | 356 | 356 | 1  |
| 46 | 358 | 360 | 3  |
| 47 | 362 | 364 | 3  |
| 48 | 366 | 369 | 4  |
| 49 | 377 | 379 | 3  |
| 50 | 381 | 381 | 1  |
| 51 | 383 | 383 | 1  |
| 52 | 385 | 386 | 2  |
| 53 | 388 | 388 | 1  |
| 54 | 412 | 412 | 1  |
| 55 | 414 | 421 | 8  |
| 56 | 428 | 428 | 1  |
| 57 | 437 | 449 | 13 |
| 58 | 504 | 504 | 1  |

# 190 positions (cumulative volume <= 37 Angstrom^3)

|    | start | end | length |
|----|-------|-----|--------|
| 1  | 1     | 1   | 1      |
| 2  | 3     | 3   | 1      |
| 3  | 8     | 21  | 14     |
| 4  | 28    | 28  | 1      |
| 5  | 33    | 34  | 2      |
| 6  | 36    | 36  | 1      |
| 7  | 38    | 38  | 1      |
| 8  | 42    | 42  | 1      |
| 9  | 44    | 50  | 7      |
| 10 | 55    | 74  | 20     |
| 11 | 78    | 78  | 1      |
| 12 | 84    | 84  | 1      |
| 13 | 86    | 86  | 1      |
| 14 | 88    | 98  | 11     |
| 15 | 100   | 106 | 7      |
| 16 | 109   | 109 | 1      |
| 17 | 112   | 113 | 2      |
| 18 | 115   | 115 | 1      |
| 19 | 117   | 117 | 1      |
| 20 | 121   | 123 | 3      |
| 21 | 126   | 126 | 1      |
| 22 | 135   | 135 | 1      |
| 23 | 139   | 140 | 2      |
| 24 | 148   | 148 | 1      |
| 25 | 150   | 165 | 16     |
| 26 | 167   | 167 | 1      |
| 27 | 175   | 178 | 4      |
| 28 | 180   | 180 | 1      |
| 29 | 182   | 182 | 1      |
| 30 | 189   | 189 | 1      |

Supplementary Text 2

|    |     |     |    |
|----|-----|-----|----|
| 31 | 214 | 221 | 8  |
| 32 | 234 | 234 | 1  |
| 33 | 240 | 240 | 1  |
| 34 | 251 | 253 | 3  |
| 35 | 256 | 257 | 2  |
| 36 | 259 | 264 | 6  |
| 37 | 289 | 289 | 1  |
| 38 | 311 | 311 | 1  |
| 39 | 313 | 314 | 2  |
| 40 | 318 | 327 | 10 |
| 41 | 329 | 331 | 3  |
| 42 | 333 | 333 | 1  |
| 43 | 352 | 352 | 1  |
| 44 | 356 | 356 | 1  |
| 45 | 358 | 360 | 3  |
| 46 | 362 | 364 | 3  |
| 47 | 366 | 369 | 4  |
| 48 | 377 | 379 | 3  |
| 49 | 381 | 381 | 1  |
| 50 | 383 | 383 | 1  |
| 51 | 385 | 386 | 2  |
| 52 | 388 | 388 | 1  |
| 53 | 412 | 412 | 1  |
| 54 | 414 | 421 | 8  |
| 55 | 428 | 428 | 1  |
| 56 | 437 | 449 | 13 |
| 57 | 504 | 504 | 1  |

# 192 positions (cumulative volume <= 38 Angstrom^3)

|    | start | end | length |
|----|-------|-----|--------|
| 1  | 1     | 1   | 1      |
| 2  | 3     | 3   | 1      |
| 3  | 8     | 21  | 14     |
| 4  | 28    | 28  | 1      |
| 5  | 33    | 34  | 2      |
| 6  | 36    | 36  | 1      |
| 7  | 38    | 38  | 1      |
| 8  | 42    | 42  | 1      |
| 9  | 44    | 50  | 7      |
| 10 | 55    | 74  | 20     |
| 11 | 78    | 78  | 1      |
| 12 | 84    | 84  | 1      |
| 13 | 86    | 86  | 1      |
| 14 | 88    | 98  | 11     |
| 15 | 100   | 106 | 7      |
| 16 | 109   | 109 | 1      |
| 17 | 112   | 113 | 2      |
| 18 | 115   | 115 | 1      |
| 19 | 117   | 117 | 1      |
| 20 | 121   | 123 | 3      |
| 21 | 126   | 126 | 1      |

Supplementary Text 2

|    |     |     |    |
|----|-----|-----|----|
| 22 | 135 | 135 | 1  |
| 23 | 139 | 140 | 2  |
| 24 | 148 | 148 | 1  |
| 25 | 150 | 165 | 16 |
| 26 | 167 | 167 | 1  |
| 27 | 175 | 178 | 4  |
| 28 | 180 | 180 | 1  |
| 29 | 182 | 182 | 1  |
| 30 | 189 | 189 | 1  |
| 31 | 214 | 221 | 8  |
| 32 | 234 | 234 | 1  |
| 33 | 240 | 240 | 1  |
| 34 | 251 | 253 | 3  |
| 35 | 255 | 257 | 3  |
| 36 | 259 | 264 | 6  |
| 37 | 289 | 289 | 1  |
| 38 | 311 | 311 | 1  |
| 39 | 313 | 314 | 2  |
| 40 | 318 | 327 | 10 |
| 41 | 329 | 331 | 3  |
| 42 | 333 | 333 | 1  |
| 43 | 352 | 352 | 1  |
| 44 | 356 | 356 | 1  |
| 45 | 358 | 360 | 3  |
| 46 | 362 | 364 | 3  |
| 47 | 366 | 369 | 4  |
| 48 | 377 | 379 | 3  |
| 49 | 381 | 381 | 1  |
| 50 | 383 | 383 | 1  |
| 51 | 385 | 388 | 4  |
| 52 | 412 | 412 | 1  |
| 53 | 414 | 421 | 8  |
| 54 | 428 | 428 | 1  |
| 55 | 437 | 449 | 13 |
| 56 | 504 | 504 | 1  |

# 194 positions (cumulative volume <= 39 Angstrom^3)

|    | start | end | length |
|----|-------|-----|--------|
| 1  | 1     | 1   | 1      |
| 2  | 3     | 3   | 1      |
| 3  | 8     | 21  | 14     |
| 4  | 28    | 28  | 1      |
| 5  | 33    | 34  | 2      |
| 6  | 36    | 36  | 1      |
| 7  | 38    | 38  | 1      |
| 8  | 42    | 42  | 1      |
| 9  | 44    | 50  | 7      |
| 10 | 55    | 74  | 20     |
| 11 | 78    | 78  | 1      |
| 12 | 84    | 84  | 1      |
| 13 | 86    | 86  | 1      |



Supplementary Text 2

|    |     |     |    |
|----|-----|-----|----|
| 14 | 88  | 98  | 11 |
| 15 | 100 | 106 | 7  |
| 16 | 109 | 109 | 1  |
| 17 | 112 | 113 | 2  |
| 18 | 115 | 115 | 1  |
| 19 | 117 | 117 | 1  |
| 20 | 121 | 123 | 3  |
| 21 | 126 | 126 | 1  |
| 22 | 135 | 135 | 1  |
| 23 | 139 | 140 | 2  |
| 24 | 148 | 148 | 1  |
| 25 | 150 | 165 | 16 |
| 26 | 167 | 167 | 1  |
| 27 | 175 | 178 | 4  |
| 28 | 180 | 180 | 1  |
| 29 | 182 | 182 | 1  |
| 30 | 189 | 189 | 1  |
| 31 | 214 | 221 | 8  |
| 32 | 234 | 234 | 1  |
| 33 | 240 | 240 | 1  |
| 34 | 251 | 253 | 3  |
| 35 | 255 | 257 | 3  |
| 36 | 259 | 264 | 6  |
| 37 | 289 | 289 | 1  |
| 38 | 306 | 306 | 1  |
| 39 | 311 | 311 | 1  |
| 40 | 313 | 314 | 2  |
| 41 | 318 | 327 | 10 |
| 42 | 329 | 331 | 3  |
| 43 | 333 | 333 | 1  |
| 44 | 352 | 352 | 1  |
| 45 | 356 | 356 | 1  |
| 46 | 358 | 360 | 3  |
| 47 | 362 | 364 | 3  |
| 48 | 366 | 369 | 4  |
| 49 | 377 | 379 | 3  |
| 50 | 381 | 381 | 1  |
| 51 | 383 | 383 | 1  |
| 52 | 385 | 388 | 4  |
| 53 | 412 | 412 | 1  |
| 54 | 414 | 421 | 8  |
| 55 | 428 | 428 | 1  |
| 56 | 437 | 449 | 13 |
| 57 | 501 | 501 | 1  |
| 58 | 504 | 504 | 1  |

# 196 positions (cumulative volume <= 40 Angstrom^3)

|   | start | end | length |
|---|-------|-----|--------|
| 1 | 1     | 1   | 1      |
| 2 | 3     | 3   | 1      |
| 3 | 8     | 21  | 14     |

Supplementary Text 2

|    |     |     |    |
|----|-----|-----|----|
| 4  | 28  | 28  | 1  |
| 5  | 31  | 31  | 1  |
| 6  | 33  | 34  | 2  |
| 7  | 36  | 38  | 3  |
| 8  | 42  | 42  | 1  |
| 9  | 44  | 50  | 7  |
| 10 | 55  | 74  | 20 |
| 11 | 78  | 78  | 1  |
| 12 | 84  | 84  | 1  |
| 13 | 86  | 86  | 1  |
| 14 | 88  | 98  | 11 |
| 15 | 100 | 106 | 7  |
| 16 | 109 | 109 | 1  |
| 17 | 112 | 113 | 2  |
| 18 | 115 | 115 | 1  |
| 19 | 117 | 117 | 1  |
| 20 | 121 | 123 | 3  |
| 21 | 126 | 126 | 1  |
| 22 | 135 | 135 | 1  |
| 23 | 139 | 140 | 2  |
| 24 | 148 | 148 | 1  |
| 25 | 150 | 165 | 16 |
| 26 | 167 | 167 | 1  |
| 27 | 175 | 178 | 4  |
| 28 | 180 | 180 | 1  |
| 29 | 182 | 182 | 1  |
| 30 | 189 | 189 | 1  |
| 31 | 214 | 221 | 8  |
| 32 | 234 | 234 | 1  |
| 33 | 240 | 240 | 1  |
| 34 | 251 | 253 | 3  |
| 35 | 255 | 257 | 3  |
| 36 | 259 | 264 | 6  |
| 37 | 289 | 289 | 1  |
| 38 | 306 | 306 | 1  |
| 39 | 311 | 311 | 1  |
| 40 | 313 | 314 | 2  |
| 41 | 318 | 327 | 10 |
| 42 | 329 | 331 | 3  |
| 43 | 333 | 333 | 1  |
| 44 | 352 | 352 | 1  |
| 45 | 356 | 356 | 1  |
| 46 | 358 | 360 | 3  |
| 47 | 362 | 364 | 3  |
| 48 | 366 | 369 | 4  |
| 49 | 377 | 379 | 3  |
| 50 | 381 | 381 | 1  |
| 51 | 383 | 383 | 1  |
| 52 | 385 | 388 | 4  |
| 53 | 412 | 412 | 1  |

Supplementary Text 2

|                                                      |       |     |        |
|------------------------------------------------------|-------|-----|--------|
| 54                                                   | 414   | 421 | 8      |
| 55                                                   | 428   | 428 | 1      |
| 56                                                   | 437   | 449 | 13     |
| 57                                                   | 501   | 501 | 1      |
| 58                                                   | 504   | 504 | 1      |
| # 198 positions (cumulative volume <= 41 Angstrom^3) |       |     |        |
|                                                      | start | end | length |
| 1                                                    | 1     | 1   | 1      |
| 2                                                    | 3     | 3   | 1      |
| 3                                                    | 8     | 21  | 14     |
| 4                                                    | 28    | 28  | 1      |
| 5                                                    | 31    | 31  | 1      |
| 6                                                    | 33    | 34  | 2      |
| 7                                                    | 36    | 38  | 3      |
| 8                                                    | 42    | 42  | 1      |
| 9                                                    | 44    | 50  | 7      |
| 10                                                   | 55    | 74  | 20     |
| 11                                                   | 78    | 78  | 1      |
| 12                                                   | 84    | 84  | 1      |
| 13                                                   | 86    | 86  | 1      |
| 14                                                   | 88    | 98  | 11     |
| 15                                                   | 100   | 106 | 7      |
| 16                                                   | 109   | 109 | 1      |
| 17                                                   | 112   | 113 | 2      |
| 18                                                   | 115   | 115 | 1      |
| 19                                                   | 117   | 117 | 1      |
| 20                                                   | 121   | 123 | 3      |
| 21                                                   | 126   | 126 | 1      |
| 22                                                   | 135   | 135 | 1      |
| 23                                                   | 139   | 140 | 2      |
| 24                                                   | 148   | 148 | 1      |
| 25                                                   | 150   | 165 | 16     |
| 26                                                   | 167   | 167 | 1      |
| 27                                                   | 175   | 178 | 4      |
| 28                                                   | 180   | 180 | 1      |
| 29                                                   | 182   | 182 | 1      |
| 30                                                   | 189   | 189 | 1      |
| 31                                                   | 214   | 221 | 8      |
| 32                                                   | 234   | 234 | 1      |
| 33                                                   | 240   | 240 | 1      |
| 34                                                   | 251   | 253 | 3      |
| 35                                                   | 255   | 257 | 3      |
| 36                                                   | 259   | 264 | 6      |
| 37                                                   | 289   | 289 | 1      |
| 38                                                   | 306   | 306 | 1      |
| 39                                                   | 311   | 311 | 1      |
| 40                                                   | 313   | 314 | 2      |
| 41                                                   | 318   | 327 | 10     |
| 42                                                   | 329   | 331 | 3      |
| 43                                                   | 333   | 333 | 1      |

Supplementary Text 2

|    |     |     |    |
|----|-----|-----|----|
| 44 | 352 | 352 | 1  |
| 45 | 356 | 356 | 1  |
| 46 | 358 | 360 | 3  |
| 47 | 362 | 364 | 3  |
| 48 | 366 | 369 | 4  |
| 49 | 377 | 379 | 3  |
| 50 | 381 | 381 | 1  |
| 51 | 383 | 383 | 1  |
| 52 | 385 | 388 | 4  |
| 53 | 408 | 408 | 1  |
| 54 | 412 | 412 | 1  |
| 55 | 414 | 421 | 8  |
| 56 | 426 | 426 | 1  |
| 57 | 428 | 428 | 1  |
| 58 | 437 | 449 | 13 |
| 59 | 501 | 501 | 1  |
| 60 | 504 | 504 | 1  |

# 203 positions (cumulative volume <= 42 Angstrom^3)

|    | start | end | length |
|----|-------|-----|--------|
| 1  | 1     | 1   | 1      |
| 2  | 3     | 3   | 1      |
| 3  | 8     | 21  | 14     |
| 4  | 28    | 28  | 1      |
| 5  | 31    | 31  | 1      |
| 6  | 33    | 34  | 2      |
| 7  | 36    | 38  | 3      |
| 8  | 42    | 50  | 9      |
| 9  | 55    | 74  | 20     |
| 10 | 78    | 78  | 1      |
| 11 | 84    | 84  | 1      |
| 12 | 86    | 86  | 1      |
| 13 | 88    | 98  | 11     |
| 14 | 100   | 109 | 10     |
| 15 | 112   | 113 | 2      |
| 16 | 115   | 115 | 1      |
| 17 | 117   | 117 | 1      |
| 18 | 121   | 123 | 3      |
| 19 | 126   | 126 | 1      |
| 20 | 135   | 136 | 2      |
| 21 | 139   | 140 | 2      |
| 22 | 148   | 148 | 1      |
| 23 | 150   | 165 | 16     |
| 24 | 167   | 167 | 1      |
| 25 | 175   | 178 | 4      |
| 26 | 180   | 180 | 1      |
| 27 | 182   | 182 | 1      |
| 28 | 189   | 189 | 1      |
| 29 | 214   | 221 | 8      |
| 30 | 234   | 234 | 1      |
| 31 | 240   | 240 | 1      |

Supplementary Text 2

|    |     |     |    |
|----|-----|-----|----|
| 32 | 251 | 253 | 3  |
| 33 | 255 | 257 | 3  |
| 34 | 259 | 264 | 6  |
| 35 | 289 | 289 | 1  |
| 36 | 306 | 306 | 1  |
| 37 | 311 | 311 | 1  |
| 38 | 313 | 314 | 2  |
| 39 | 318 | 327 | 10 |
| 40 | 329 | 331 | 3  |
| 41 | 333 | 333 | 1  |
| 42 | 352 | 352 | 1  |
| 43 | 356 | 356 | 1  |
| 44 | 358 | 360 | 3  |
| 45 | 362 | 364 | 3  |
| 46 | 366 | 369 | 4  |
| 47 | 377 | 379 | 3  |
| 48 | 381 | 381 | 1  |
| 49 | 383 | 383 | 1  |
| 50 | 385 | 388 | 4  |
| 51 | 408 | 408 | 1  |
| 52 | 412 | 412 | 1  |
| 53 | 414 | 421 | 8  |
| 54 | 426 | 426 | 1  |
| 55 | 428 | 428 | 1  |
| 56 | 437 | 449 | 13 |
| 57 | 457 | 457 | 1  |
| 58 | 501 | 501 | 1  |
| 59 | 504 | 504 | 1  |

# 204 positions (cumulative volume <= 43 Angstrom^3)

|    | start | end | length |
|----|-------|-----|--------|
| 1  | 1     | 1   | 1      |
| 2  | 3     | 3   | 1      |
| 3  | 8     | 21  | 14     |
| 4  | 28    | 28  | 1      |
| 5  | 31    | 31  | 1      |
| 6  | 33    | 34  | 2      |
| 7  | 36    | 38  | 3      |
| 8  | 42    | 50  | 9      |
| 9  | 55    | 74  | 20     |
| 10 | 78    | 78  | 1      |
| 11 | 84    | 84  | 1      |
| 12 | 86    | 86  | 1      |
| 13 | 88    | 98  | 11     |
| 14 | 100   | 109 | 10     |
| 15 | 112   | 113 | 2      |
| 16 | 115   | 115 | 1      |
| 17 | 117   | 117 | 1      |
| 18 | 121   | 123 | 3      |
| 19 | 126   | 126 | 1      |
| 20 | 135   | 136 | 2      |

Supplementary Text 2

|    |     |     |    |
|----|-----|-----|----|
| 21 | 139 | 140 | 2  |
| 22 | 148 | 148 | 1  |
| 23 | 150 | 165 | 16 |
| 24 | 167 | 167 | 1  |
| 25 | 175 | 178 | 4  |
| 26 | 180 | 180 | 1  |
| 27 | 182 | 182 | 1  |
| 28 | 189 | 189 | 1  |
| 29 | 214 | 221 | 8  |
| 30 | 234 | 234 | 1  |
| 31 | 240 | 240 | 1  |
| 32 | 251 | 253 | 3  |
| 33 | 255 | 257 | 3  |
| 34 | 259 | 264 | 6  |
| 35 | 289 | 289 | 1  |
| 36 | 306 | 306 | 1  |
| 37 | 310 | 311 | 2  |
| 38 | 313 | 314 | 2  |
| 39 | 318 | 327 | 10 |
| 40 | 329 | 331 | 3  |
| 41 | 333 | 333 | 1  |
| 42 | 352 | 352 | 1  |
| 43 | 356 | 356 | 1  |
| 44 | 358 | 360 | 3  |
| 45 | 362 | 364 | 3  |
| 46 | 366 | 369 | 4  |
| 47 | 377 | 379 | 3  |
| 48 | 381 | 381 | 1  |
| 49 | 383 | 383 | 1  |
| 50 | 385 | 388 | 4  |
| 51 | 408 | 408 | 1  |
| 52 | 412 | 412 | 1  |
| 53 | 414 | 421 | 8  |
| 54 | 426 | 426 | 1  |
| 55 | 428 | 428 | 1  |
| 56 | 437 | 449 | 13 |
| 57 | 457 | 457 | 1  |
| 58 | 501 | 501 | 1  |
| 59 | 504 | 504 | 1  |

# 205 positions (cumulative volume <= 44 Angstrom^3)

|   | start | end | length |
|---|-------|-----|--------|
| 1 | 1     | 1   | 1      |
| 2 | 3     | 3   | 1      |
| 3 | 8     | 21  | 14     |
| 4 | 28    | 28  | 1      |
| 5 | 31    | 31  | 1      |
| 6 | 33    | 34  | 2      |
| 7 | 36    | 38  | 3      |
| 8 | 42    | 50  | 9      |
| 9 | 55    | 74  | 20     |

Supplementary Text 2

|    |     |     |    |
|----|-----|-----|----|
| 10 | 78  | 78  | 1  |
| 11 | 84  | 84  | 1  |
| 12 | 86  | 86  | 1  |
| 13 | 88  | 98  | 11 |
| 14 | 100 | 109 | 10 |
| 15 | 112 | 113 | 2  |
| 16 | 115 | 115 | 1  |
| 17 | 117 | 117 | 1  |
| 18 | 121 | 123 | 3  |
| 19 | 126 | 126 | 1  |
| 20 | 135 | 136 | 2  |
| 21 | 139 | 140 | 2  |
| 22 | 148 | 148 | 1  |
| 23 | 150 | 165 | 16 |
| 24 | 167 | 167 | 1  |
| 25 | 175 | 178 | 4  |
| 26 | 180 | 182 | 3  |
| 27 | 189 | 189 | 1  |
| 28 | 214 | 221 | 8  |
| 29 | 234 | 234 | 1  |
| 30 | 240 | 240 | 1  |
| 31 | 251 | 253 | 3  |
| 32 | 255 | 257 | 3  |
| 33 | 259 | 264 | 6  |
| 34 | 289 | 289 | 1  |
| 35 | 306 | 306 | 1  |
| 36 | 310 | 311 | 2  |
| 37 | 313 | 314 | 2  |
| 38 | 318 | 327 | 10 |
| 39 | 329 | 331 | 3  |
| 40 | 333 | 333 | 1  |
| 41 | 352 | 352 | 1  |
| 42 | 356 | 356 | 1  |
| 43 | 358 | 360 | 3  |
| 44 | 362 | 364 | 3  |
| 45 | 366 | 369 | 4  |
| 46 | 377 | 379 | 3  |
| 47 | 381 | 381 | 1  |
| 48 | 383 | 383 | 1  |
| 49 | 385 | 388 | 4  |
| 50 | 408 | 408 | 1  |
| 51 | 412 | 412 | 1  |
| 52 | 414 | 421 | 8  |
| 53 | 426 | 426 | 1  |
| 54 | 428 | 428 | 1  |
| 55 | 437 | 449 | 13 |
| 56 | 457 | 457 | 1  |
| 57 | 501 | 501 | 1  |
| 58 | 504 | 504 | 1  |

# 207 positions (cumulative volume <= 45 Angstrom^3)

Supplementary Text 2

|    | start | end | length |
|----|-------|-----|--------|
| 1  | 1     | 1   | 1      |
| 2  | 3     | 3   | 1      |
| 3  | 8     | 21  | 14     |
| 4  | 28    | 28  | 1      |
| 5  | 31    | 31  | 1      |
| 6  | 33    | 34  | 2      |
| 7  | 36    | 38  | 3      |
| 8  | 42    | 50  | 9      |
| 9  | 55    | 74  | 20     |
| 10 | 78    | 78  | 1      |
| 11 | 84    | 84  | 1      |
| 12 | 86    | 86  | 1      |
| 13 | 88    | 98  | 11     |
| 14 | 100   | 110 | 11     |
| 15 | 112   | 113 | 2      |
| 16 | 115   | 115 | 1      |
| 17 | 117   | 117 | 1      |
| 18 | 121   | 123 | 3      |
| 19 | 126   | 126 | 1      |
| 20 | 135   | 136 | 2      |
| 21 | 139   | 140 | 2      |
| 22 | 148   | 148 | 1      |
| 23 | 150   | 165 | 16     |
| 24 | 167   | 167 | 1      |
| 25 | 175   | 178 | 4      |
| 26 | 180   | 182 | 3      |
| 27 | 189   | 189 | 1      |
| 28 | 214   | 221 | 8      |
| 29 | 234   | 234 | 1      |
| 30 | 240   | 240 | 1      |
| 31 | 251   | 253 | 3      |
| 32 | 255   | 264 | 10     |
| 33 | 289   | 289 | 1      |
| 34 | 306   | 306 | 1      |
| 35 | 310   | 311 | 2      |
| 36 | 313   | 314 | 2      |
| 37 | 318   | 327 | 10     |
| 38 | 329   | 331 | 3      |
| 39 | 333   | 333 | 1      |
| 40 | 352   | 352 | 1      |
| 41 | 356   | 356 | 1      |
| 42 | 358   | 360 | 3      |
| 43 | 362   | 364 | 3      |
| 44 | 366   | 369 | 4      |
| 45 | 377   | 379 | 3      |
| 46 | 381   | 381 | 1      |
| 47 | 383   | 383 | 1      |
| 48 | 385   | 388 | 4      |
| 49 | 408   | 408 | 1      |



Supplementary Text 2

|                                                      |       |     |        |
|------------------------------------------------------|-------|-----|--------|
| 50                                                   | 412   | 412 | 1      |
| 51                                                   | 414   | 421 | 8      |
| 52                                                   | 426   | 426 | 1      |
| 53                                                   | 428   | 428 | 1      |
| 54                                                   | 437   | 449 | 13     |
| 55                                                   | 457   | 457 | 1      |
| 56                                                   | 501   | 501 | 1      |
| 57                                                   | 504   | 504 | 1      |
| # 209 positions (cumulative volume <= 46 Angstrom^3) |       |     |        |
|                                                      | start | end | length |
| 1                                                    | 1     | 1   | 1      |
| 2                                                    | 3     | 3   | 1      |
| 3                                                    | 8     | 21  | 14     |
| 4                                                    | 28    | 28  | 1      |
| 5                                                    | 31    | 31  | 1      |
| 6                                                    | 33    | 38  | 6      |
| 7                                                    | 42    | 50  | 9      |
| 8                                                    | 55    | 74  | 20     |
| 9                                                    | 78    | 78  | 1      |
| 10                                                   | 84    | 84  | 1      |
| 11                                                   | 86    | 86  | 1      |
| 12                                                   | 88    | 98  | 11     |
| 13                                                   | 100   | 110 | 11     |
| 14                                                   | 112   | 113 | 2      |
| 15                                                   | 115   | 115 | 1      |
| 16                                                   | 117   | 117 | 1      |
| 17                                                   | 121   | 123 | 3      |
| 18                                                   | 126   | 126 | 1      |
| 19                                                   | 135   | 136 | 2      |
| 20                                                   | 139   | 140 | 2      |
| 21                                                   | 148   | 148 | 1      |
| 22                                                   | 150   | 165 | 16     |
| 23                                                   | 167   | 167 | 1      |
| 24                                                   | 175   | 178 | 4      |
| 25                                                   | 180   | 182 | 3      |
| 26                                                   | 189   | 189 | 1      |
| 27                                                   | 214   | 221 | 8      |
| 28                                                   | 234   | 234 | 1      |
| 29                                                   | 240   | 240 | 1      |
| 30                                                   | 251   | 253 | 3      |
| 31                                                   | 255   | 264 | 10     |
| 32                                                   | 289   | 289 | 1      |
| 33                                                   | 306   | 306 | 1      |
| 34                                                   | 310   | 311 | 2      |
| 35                                                   | 313   | 314 | 2      |
| 36                                                   | 318   | 331 | 14     |
| 37                                                   | 333   | 333 | 1      |
| 38                                                   | 352   | 352 | 1      |
| 39                                                   | 356   | 356 | 1      |
| 40                                                   | 358   | 360 | 3      |

Supplementary Text 2

|    |     |     |    |
|----|-----|-----|----|
| 41 | 362 | 364 | 3  |
| 42 | 366 | 369 | 4  |
| 43 | 377 | 379 | 3  |
| 44 | 381 | 381 | 1  |
| 45 | 383 | 383 | 1  |
| 46 | 385 | 388 | 4  |
| 47 | 408 | 408 | 1  |
| 48 | 412 | 412 | 1  |
| 49 | 414 | 421 | 8  |
| 50 | 426 | 426 | 1  |
| 51 | 428 | 428 | 1  |
| 52 | 437 | 449 | 13 |
| 53 | 457 | 457 | 1  |
| 54 | 501 | 501 | 1  |
| 55 | 504 | 504 | 1  |

# 210 positions (cumulative volume <= 47 Angstrom^3)

|    | start | end | length |
|----|-------|-----|--------|
| 1  | 1     | 1   | 1      |
| 2  | 3     | 3   | 1      |
| 3  | 8     | 21  | 14     |
| 4  | 28    | 28  | 1      |
| 5  | 31    | 31  | 1      |
| 6  | 33    | 38  | 6      |
| 7  | 42    | 50  | 9      |
| 8  | 55    | 74  | 20     |
| 9  | 78    | 78  | 1      |
| 10 | 84    | 84  | 1      |
| 11 | 86    | 86  | 1      |
| 12 | 88    | 98  | 11     |
| 13 | 100   | 110 | 11     |
| 14 | 112   | 113 | 2      |
| 15 | 115   | 115 | 1      |
| 16 | 117   | 117 | 1      |
| 17 | 121   | 123 | 3      |
| 18 | 126   | 126 | 1      |
| 19 | 135   | 136 | 2      |
| 20 | 139   | 140 | 2      |
| 21 | 148   | 148 | 1      |
| 22 | 150   | 165 | 16     |
| 23 | 167   | 167 | 1      |
| 24 | 175   | 178 | 4      |
| 25 | 180   | 182 | 3      |
| 26 | 189   | 189 | 1      |
| 27 | 214   | 221 | 8      |
| 28 | 234   | 234 | 1      |
| 29 | 240   | 240 | 1      |
| 30 | 251   | 253 | 3      |
| 31 | 255   | 264 | 10     |
| 32 | 289   | 289 | 1      |
| 33 | 306   | 306 | 1      |

Supplementary Text 2

|    |     |     |    |
|----|-----|-----|----|
| 34 | 310 | 311 | 2  |
| 35 | 313 | 314 | 2  |
| 36 | 318 | 331 | 14 |
| 37 | 333 | 333 | 1  |
| 38 | 352 | 352 | 1  |
| 39 | 356 | 356 | 1  |
| 40 | 358 | 360 | 3  |
| 41 | 362 | 364 | 3  |
| 42 | 366 | 369 | 4  |
| 43 | 377 | 379 | 3  |
| 44 | 381 | 381 | 1  |
| 45 | 383 | 383 | 1  |
| 46 | 385 | 388 | 4  |
| 47 | 408 | 408 | 1  |
| 48 | 412 | 412 | 1  |
| 49 | 414 | 421 | 8  |
| 50 | 426 | 426 | 1  |
| 51 | 428 | 428 | 1  |
| 52 | 437 | 450 | 14 |
| 53 | 457 | 457 | 1  |
| 54 | 501 | 501 | 1  |
| 55 | 504 | 504 | 1  |

# 211 positions (cumulative volume <= 48 Angstrom^3)

|    | start | end | length |
|----|-------|-----|--------|
| 1  | 1     | 1   | 1      |
| 2  | 3     | 3   | 1      |
| 3  | 8     | 22  | 15     |
| 4  | 28    | 28  | 1      |
| 5  | 31    | 31  | 1      |
| 6  | 33    | 38  | 6      |
| 7  | 42    | 50  | 9      |
| 8  | 55    | 74  | 20     |
| 9  | 78    | 78  | 1      |
| 10 | 84    | 84  | 1      |
| 11 | 86    | 86  | 1      |
| 12 | 88    | 98  | 11     |
| 13 | 100   | 110 | 11     |
| 14 | 112   | 113 | 2      |
| 15 | 115   | 115 | 1      |
| 16 | 117   | 117 | 1      |
| 17 | 121   | 123 | 3      |
| 18 | 126   | 126 | 1      |
| 19 | 135   | 136 | 2      |
| 20 | 139   | 140 | 2      |
| 21 | 148   | 148 | 1      |
| 22 | 150   | 165 | 16     |
| 23 | 167   | 167 | 1      |
| 24 | 175   | 178 | 4      |
| 25 | 180   | 182 | 3      |
| 26 | 189   | 189 | 1      |

Supplementary Text 2

|    |     |     |    |
|----|-----|-----|----|
| 27 | 214 | 221 | 8  |
| 28 | 234 | 234 | 1  |
| 29 | 240 | 240 | 1  |
| 30 | 251 | 253 | 3  |
| 31 | 255 | 264 | 10 |
| 32 | 289 | 289 | 1  |
| 33 | 306 | 306 | 1  |
| 34 | 310 | 311 | 2  |
| 35 | 313 | 314 | 2  |
| 36 | 318 | 331 | 14 |
| 37 | 333 | 333 | 1  |
| 38 | 352 | 352 | 1  |
| 39 | 356 | 356 | 1  |
| 40 | 358 | 360 | 3  |
| 41 | 362 | 364 | 3  |
| 42 | 366 | 369 | 4  |
| 43 | 377 | 379 | 3  |
| 44 | 381 | 381 | 1  |
| 45 | 383 | 383 | 1  |
| 46 | 385 | 388 | 4  |
| 47 | 408 | 408 | 1  |
| 48 | 412 | 412 | 1  |
| 49 | 414 | 421 | 8  |
| 50 | 426 | 426 | 1  |
| 51 | 428 | 428 | 1  |
| 52 | 437 | 450 | 14 |
| 53 | 457 | 457 | 1  |
| 54 | 501 | 501 | 1  |
| 55 | 504 | 504 | 1  |

# 212 positions (cumulative volume <= 49 Angstrom^3)

|    | start | end | length |
|----|-------|-----|--------|
| 1  | 1     | 1   | 1      |
| 2  | 3     | 3   | 1      |
| 3  | 8     | 22  | 15     |
| 4  | 28    | 28  | 1      |
| 5  | 31    | 31  | 1      |
| 6  | 33    | 38  | 6      |
| 7  | 42    | 50  | 9      |
| 8  | 55    | 74  | 20     |
| 9  | 78    | 78  | 1      |
| 10 | 84    | 84  | 1      |
| 11 | 86    | 86  | 1      |
| 12 | 88    | 98  | 11     |
| 13 | 100   | 110 | 11     |
| 14 | 112   | 113 | 2      |
| 15 | 115   | 115 | 1      |
| 16 | 117   | 117 | 1      |
| 17 | 121   | 123 | 3      |
| 18 | 126   | 126 | 1      |
| 19 | 130   | 130 | 1      |

Supplementary Text 2

|    |     |     |    |
|----|-----|-----|----|
| 20 | 135 | 136 | 2  |
| 21 | 139 | 140 | 2  |
| 22 | 148 | 148 | 1  |
| 23 | 150 | 165 | 16 |
| 24 | 167 | 167 | 1  |
| 25 | 175 | 178 | 4  |
| 26 | 180 | 182 | 3  |
| 27 | 189 | 189 | 1  |
| 28 | 214 | 221 | 8  |
| 29 | 234 | 234 | 1  |
| 30 | 240 | 240 | 1  |
| 31 | 251 | 253 | 3  |
| 32 | 255 | 264 | 10 |
| 33 | 289 | 289 | 1  |
| 34 | 306 | 306 | 1  |
| 35 | 310 | 311 | 2  |
| 36 | 313 | 314 | 2  |
| 37 | 318 | 331 | 14 |
| 38 | 333 | 333 | 1  |
| 39 | 352 | 352 | 1  |
| 40 | 356 | 356 | 1  |
| 41 | 358 | 360 | 3  |
| 42 | 362 | 364 | 3  |
| 43 | 366 | 369 | 4  |
| 44 | 377 | 379 | 3  |
| 45 | 381 | 381 | 1  |
| 46 | 383 | 383 | 1  |
| 47 | 385 | 388 | 4  |
| 48 | 408 | 408 | 1  |
| 49 | 412 | 412 | 1  |
| 50 | 414 | 421 | 8  |
| 51 | 426 | 426 | 1  |
| 52 | 428 | 428 | 1  |
| 53 | 437 | 450 | 14 |
| 54 | 457 | 457 | 1  |
| 55 | 501 | 501 | 1  |
| 56 | 504 | 504 | 1  |

# 213 positions (cumulative volume <= 50 Angstrom^3)

|    | start | end | length |
|----|-------|-----|--------|
| 1  | 1     | 1   | 1      |
| 2  | 3     | 3   | 1      |
| 3  | 8     | 22  | 15     |
| 4  | 28    | 28  | 1      |
| 5  | 31    | 31  | 1      |
| 6  | 33    | 38  | 6      |
| 7  | 42    | 50  | 9      |
| 8  | 55    | 74  | 20     |
| 9  | 78    | 78  | 1      |
| 10 | 84    | 84  | 1      |
| 11 | 86    | 86  | 1      |

Supplementary Text 2

|    |     |     |    |
|----|-----|-----|----|
| 12 | 88  | 98  | 11 |
| 13 | 100 | 110 | 11 |
| 14 | 112 | 113 | 2  |
| 15 | 115 | 115 | 1  |
| 16 | 117 | 117 | 1  |
| 17 | 121 | 123 | 3  |
| 18 | 126 | 126 | 1  |
| 19 | 130 | 130 | 1  |
| 20 | 135 | 136 | 2  |
| 21 | 139 | 140 | 2  |
| 22 | 148 | 148 | 1  |
| 23 | 150 | 165 | 16 |
| 24 | 167 | 167 | 1  |
| 25 | 175 | 178 | 4  |
| 26 | 180 | 182 | 3  |
| 27 | 189 | 189 | 1  |
| 28 | 214 | 221 | 8  |
| 29 | 234 | 234 | 1  |
| 30 | 240 | 240 | 1  |
| 31 | 251 | 253 | 3  |
| 32 | 255 | 264 | 10 |
| 33 | 289 | 289 | 1  |
| 34 | 306 | 306 | 1  |
| 35 | 310 | 311 | 2  |
| 36 | 313 | 314 | 2  |
| 37 | 318 | 331 | 14 |
| 38 | 333 | 333 | 1  |
| 39 | 352 | 352 | 1  |
| 40 | 356 | 356 | 1  |
| 41 | 358 | 360 | 3  |
| 42 | 362 | 364 | 3  |
| 43 | 366 | 369 | 4  |
| 44 | 377 | 379 | 3  |
| 45 | 381 | 381 | 1  |
| 46 | 383 | 383 | 1  |
| 47 | 385 | 388 | 4  |
| 48 | 394 | 394 | 1  |
| 49 | 408 | 408 | 1  |
| 50 | 412 | 412 | 1  |
| 51 | 414 | 421 | 8  |
| 52 | 426 | 426 | 1  |
| 53 | 428 | 428 | 1  |
| 54 | 437 | 450 | 14 |
| 55 | 457 | 457 | 1  |
| 56 | 501 | 501 | 1  |
| 57 | 504 | 504 | 1  |

# 215 positions (cumulative volume <= 51 Angstrom^3)

|   | start | end | length |
|---|-------|-----|--------|
| 1 | 1     | 1   | 1      |
| 2 | 3     | 3   | 1      |

Supplementary Text 2

|    |     |     |    |
|----|-----|-----|----|
| 3  | 8   | 22  | 15 |
| 4  | 28  | 28  | 1  |
| 5  | 31  | 31  | 1  |
| 6  | 33  | 38  | 6  |
| 7  | 42  | 50  | 9  |
| 8  | 55  | 74  | 20 |
| 9  | 78  | 78  | 1  |
| 10 | 84  | 84  | 1  |
| 11 | 86  | 86  | 1  |
| 12 | 88  | 98  | 11 |
| 13 | 100 | 110 | 11 |
| 14 | 112 | 113 | 2  |
| 15 | 115 | 115 | 1  |
| 16 | 117 | 117 | 1  |
| 17 | 121 | 124 | 4  |
| 18 | 126 | 126 | 1  |
| 19 | 130 | 130 | 1  |
| 20 | 135 | 136 | 2  |
| 21 | 139 | 140 | 2  |
| 22 | 148 | 148 | 1  |
| 23 | 150 | 165 | 16 |
| 24 | 167 | 167 | 1  |
| 25 | 175 | 178 | 4  |
| 26 | 180 | 182 | 3  |
| 27 | 189 | 189 | 1  |
| 28 | 214 | 221 | 8  |
| 29 | 234 | 234 | 1  |
| 30 | 240 | 240 | 1  |
| 31 | 251 | 253 | 3  |
| 32 | 255 | 264 | 10 |
| 33 | 289 | 289 | 1  |
| 34 | 306 | 306 | 1  |
| 35 | 310 | 311 | 2  |
| 36 | 313 | 314 | 2  |
| 37 | 318 | 331 | 14 |
| 38 | 333 | 333 | 1  |
| 39 | 352 | 352 | 1  |
| 40 | 356 | 356 | 1  |
| 41 | 358 | 360 | 3  |
| 42 | 362 | 364 | 3  |
| 43 | 366 | 369 | 4  |
| 44 | 377 | 379 | 3  |
| 45 | 381 | 381 | 1  |
| 46 | 383 | 383 | 1  |
| 47 | 385 | 388 | 4  |
| 48 | 394 | 394 | 1  |
| 49 | 408 | 409 | 2  |
| 50 | 412 | 412 | 1  |
| 51 | 414 | 421 | 8  |
| 52 | 426 | 426 | 1  |

Supplementary Text 2

|                                                      |       |     |        |
|------------------------------------------------------|-------|-----|--------|
| 53                                                   | 428   | 428 | 1      |
| 54                                                   | 437   | 450 | 14     |
| 55                                                   | 457   | 457 | 1      |
| 56                                                   | 501   | 501 | 1      |
| 57                                                   | 504   | 504 | 1      |
| # 216 positions (cumulative volume <= 52 Angstrom^3) |       |     |        |
|                                                      | start | end | length |
| 1                                                    | 1     | 1   | 1      |
| 2                                                    | 3     | 3   | 1      |
| 3                                                    | 8     | 22  | 15     |
| 4                                                    | 28    | 28  | 1      |
| 5                                                    | 31    | 31  | 1      |
| 6                                                    | 33    | 38  | 6      |
| 7                                                    | 42    | 51  | 10     |
| 8                                                    | 55    | 74  | 20     |
| 9                                                    | 78    | 78  | 1      |
| 10                                                   | 84    | 84  | 1      |
| 11                                                   | 86    | 86  | 1      |
| 12                                                   | 88    | 98  | 11     |
| 13                                                   | 100   | 110 | 11     |
| 14                                                   | 112   | 113 | 2      |
| 15                                                   | 115   | 115 | 1      |
| 16                                                   | 117   | 117 | 1      |
| 17                                                   | 121   | 124 | 4      |
| 18                                                   | 126   | 126 | 1      |
| 19                                                   | 130   | 130 | 1      |
| 20                                                   | 135   | 136 | 2      |
| 21                                                   | 139   | 140 | 2      |
| 22                                                   | 148   | 148 | 1      |
| 23                                                   | 150   | 165 | 16     |
| 24                                                   | 167   | 167 | 1      |
| 25                                                   | 175   | 178 | 4      |
| 26                                                   | 180   | 182 | 3      |
| 27                                                   | 189   | 189 | 1      |
| 28                                                   | 214   | 221 | 8      |
| 29                                                   | 234   | 234 | 1      |
| 30                                                   | 240   | 240 | 1      |
| 31                                                   | 251   | 253 | 3      |
| 32                                                   | 255   | 264 | 10     |
| 33                                                   | 289   | 289 | 1      |
| 34                                                   | 306   | 306 | 1      |
| 35                                                   | 310   | 311 | 2      |
| 36                                                   | 313   | 314 | 2      |
| 37                                                   | 318   | 331 | 14     |
| 38                                                   | 333   | 333 | 1      |
| 39                                                   | 352   | 352 | 1      |
| 40                                                   | 356   | 356 | 1      |
| 41                                                   | 358   | 360 | 3      |
| 42                                                   | 362   | 364 | 3      |
| 43                                                   | 366   | 369 | 4      |



Supplementary Text 2

|    |     |     |    |
|----|-----|-----|----|
| 44 | 377 | 379 | 3  |
| 45 | 381 | 381 | 1  |
| 46 | 383 | 383 | 1  |
| 47 | 385 | 388 | 4  |
| 48 | 394 | 394 | 1  |
| 49 | 408 | 409 | 2  |
| 50 | 412 | 412 | 1  |
| 51 | 414 | 421 | 8  |
| 52 | 426 | 426 | 1  |
| 53 | 428 | 428 | 1  |
| 54 | 437 | 450 | 14 |
| 55 | 457 | 457 | 1  |
| 56 | 501 | 501 | 1  |
| 57 | 504 | 504 | 1  |

# 218 positions (cumulative volume <= 53 Angstrom^3)

|    | start | end | length |
|----|-------|-----|--------|
| 1  | 1     | 1   | 1      |
| 2  | 3     | 3   | 1      |
| 3  | 8     | 22  | 15     |
| 4  | 28    | 28  | 1      |
| 5  | 31    | 31  | 1      |
| 6  | 33    | 38  | 6      |
| 7  | 42    | 51  | 10     |
| 8  | 55    | 74  | 20     |
| 9  | 78    | 78  | 1      |
| 10 | 84    | 84  | 1      |
| 11 | 86    | 86  | 1      |
| 12 | 88    | 110 | 23     |
| 13 | 112   | 113 | 2      |
| 14 | 115   | 115 | 1      |
| 15 | 117   | 117 | 1      |
| 16 | 121   | 124 | 4      |
| 17 | 126   | 126 | 1      |
| 18 | 130   | 130 | 1      |
| 19 | 135   | 136 | 2      |
| 20 | 139   | 140 | 2      |
| 21 | 148   | 148 | 1      |
| 22 | 150   | 165 | 16     |
| 23 | 167   | 167 | 1      |
| 24 | 175   | 178 | 4      |
| 25 | 180   | 182 | 3      |
| 26 | 189   | 189 | 1      |
| 27 | 214   | 221 | 8      |
| 28 | 234   | 234 | 1      |
| 29 | 240   | 240 | 1      |
| 30 | 251   | 253 | 3      |
| 31 | 255   | 264 | 10     |
| 32 | 289   | 289 | 1      |
| 33 | 306   | 306 | 1      |
| 34 | 310   | 311 | 2      |

Supplementary Text 2

|    |     |     |    |
|----|-----|-----|----|
| 35 | 313 | 314 | 2  |
| 36 | 318 | 331 | 14 |
| 37 | 333 | 333 | 1  |
| 38 | 352 | 352 | 1  |
| 39 | 356 | 356 | 1  |
| 40 | 358 | 360 | 3  |
| 41 | 362 | 364 | 3  |
| 42 | 366 | 369 | 4  |
| 43 | 377 | 381 | 5  |
| 44 | 383 | 383 | 1  |
| 45 | 385 | 388 | 4  |
| 46 | 394 | 394 | 1  |
| 47 | 408 | 409 | 2  |
| 48 | 412 | 412 | 1  |
| 49 | 414 | 421 | 8  |
| 50 | 426 | 426 | 1  |
| 51 | 428 | 428 | 1  |
| 52 | 437 | 450 | 14 |
| 53 | 457 | 457 | 1  |
| 54 | 501 | 501 | 1  |
| 55 | 504 | 504 | 1  |

# 219 positions (cumulative volume <= 54 Angstrom^3)

|    | start | end | length |
|----|-------|-----|--------|
| 1  | 1     | 1   | 1      |
| 2  | 3     | 3   | 1      |
| 3  | 8     | 22  | 15     |
| 4  | 28    | 28  | 1      |
| 5  | 31    | 31  | 1      |
| 6  | 33    | 38  | 6      |
| 7  | 42    | 51  | 10     |
| 8  | 55    | 74  | 20     |
| 9  | 78    | 78  | 1      |
| 10 | 84    | 84  | 1      |
| 11 | 86    | 86  | 1      |
| 12 | 88    | 110 | 23     |
| 13 | 112   | 113 | 2      |
| 14 | 115   | 115 | 1      |
| 15 | 117   | 117 | 1      |
| 16 | 121   | 124 | 4      |
| 17 | 126   | 126 | 1      |
| 18 | 130   | 130 | 1      |
| 19 | 135   | 136 | 2      |
| 20 | 139   | 140 | 2      |
| 21 | 148   | 148 | 1      |
| 22 | 150   | 165 | 16     |
| 23 | 167   | 167 | 1      |
| 24 | 175   | 178 | 4      |
| 25 | 180   | 182 | 3      |
| 26 | 189   | 189 | 1      |
| 27 | 214   | 221 | 8      |

Supplementary Text 2

|    |     |     |    |
|----|-----|-----|----|
| 28 | 234 | 234 | 1  |
| 29 | 240 | 240 | 1  |
| 30 | 251 | 253 | 3  |
| 31 | 255 | 264 | 10 |
| 32 | 289 | 289 | 1  |
| 33 | 306 | 306 | 1  |
| 34 | 310 | 311 | 2  |
| 35 | 313 | 314 | 2  |
| 36 | 318 | 331 | 14 |
| 37 | 333 | 333 | 1  |
| 38 | 352 | 352 | 1  |
| 39 | 356 | 356 | 1  |
| 40 | 358 | 364 | 7  |
| 41 | 366 | 369 | 4  |
| 42 | 377 | 381 | 5  |
| 43 | 383 | 383 | 1  |
| 44 | 385 | 388 | 4  |
| 45 | 394 | 394 | 1  |
| 46 | 408 | 409 | 2  |
| 47 | 412 | 412 | 1  |
| 48 | 414 | 421 | 8  |
| 49 | 426 | 426 | 1  |
| 50 | 428 | 428 | 1  |
| 51 | 437 | 450 | 14 |
| 52 | 457 | 457 | 1  |
| 53 | 501 | 501 | 1  |
| 54 | 504 | 504 | 1  |

# 220 positions (cumulative volume <= 55 Angstrom^3)

|    | start | end | length |
|----|-------|-----|--------|
| 1  | 1     | 1   | 1      |
| 2  | 3     | 3   | 1      |
| 3  | 8     | 22  | 15     |
| 4  | 28    | 28  | 1      |
| 5  | 31    | 31  | 1      |
| 6  | 33    | 38  | 6      |
| 7  | 42    | 51  | 10     |
| 8  | 55    | 74  | 20     |
| 9  | 78    | 78  | 1      |
| 10 | 84    | 84  | 1      |
| 11 | 86    | 86  | 1      |
| 12 | 88    | 110 | 23     |
| 13 | 112   | 113 | 2      |
| 14 | 115   | 115 | 1      |
| 15 | 117   | 117 | 1      |
| 16 | 121   | 124 | 4      |
| 17 | 126   | 126 | 1      |
| 18 | 130   | 130 | 1      |
| 19 | 135   | 136 | 2      |
| 20 | 139   | 140 | 2      |
| 21 | 148   | 148 | 1      |

Supplementary Text 2

|    |     |     |    |
|----|-----|-----|----|
| 22 | 150 | 165 | 16 |
| 23 | 167 | 167 | 1  |
| 24 | 175 | 178 | 4  |
| 25 | 180 | 182 | 3  |
| 26 | 189 | 189 | 1  |
| 27 | 214 | 221 | 8  |
| 28 | 234 | 234 | 1  |
| 29 | 240 | 240 | 1  |
| 30 | 251 | 253 | 3  |
| 31 | 255 | 265 | 11 |
| 32 | 289 | 289 | 1  |
| 33 | 306 | 306 | 1  |
| 34 | 310 | 311 | 2  |
| 35 | 313 | 314 | 2  |
| 36 | 318 | 331 | 14 |
| 37 | 333 | 333 | 1  |
| 38 | 352 | 352 | 1  |
| 39 | 356 | 356 | 1  |
| 40 | 358 | 364 | 7  |
| 41 | 366 | 369 | 4  |
| 42 | 377 | 381 | 5  |
| 43 | 383 | 383 | 1  |
| 44 | 385 | 388 | 4  |
| 45 | 394 | 394 | 1  |
| 46 | 408 | 409 | 2  |
| 47 | 412 | 412 | 1  |
| 48 | 414 | 421 | 8  |
| 49 | 426 | 426 | 1  |
| 50 | 428 | 428 | 1  |
| 51 | 437 | 450 | 14 |
| 52 | 457 | 457 | 1  |
| 53 | 501 | 501 | 1  |
| 54 | 504 | 504 | 1  |

# 221 positions (cumulative volume <= 56 Angstrom^3)

|    | start | end | length |
|----|-------|-----|--------|
| 1  | 1     | 1   | 1      |
| 2  | 3     | 3   | 1      |
| 3  | 8     | 22  | 15     |
| 4  | 28    | 28  | 1      |
| 5  | 31    | 31  | 1      |
| 6  | 33    | 38  | 6      |
| 7  | 42    | 51  | 10     |
| 8  | 54    | 74  | 21     |
| 9  | 78    | 78  | 1      |
| 10 | 84    | 84  | 1      |
| 11 | 86    | 86  | 1      |
| 12 | 88    | 110 | 23     |
| 13 | 112   | 113 | 2      |
| 14 | 115   | 115 | 1      |
| 15 | 117   | 117 | 1      |

Supplementary Text 2

|    |     |     |    |
|----|-----|-----|----|
| 16 | 121 | 124 | 4  |
| 17 | 126 | 126 | 1  |
| 18 | 130 | 130 | 1  |
| 19 | 135 | 136 | 2  |
| 20 | 139 | 140 | 2  |
| 21 | 148 | 148 | 1  |
| 22 | 150 | 165 | 16 |
| 23 | 167 | 167 | 1  |
| 24 | 175 | 178 | 4  |
| 25 | 180 | 182 | 3  |
| 26 | 189 | 189 | 1  |
| 27 | 214 | 221 | 8  |
| 28 | 234 | 234 | 1  |
| 29 | 240 | 240 | 1  |
| 30 | 251 | 253 | 3  |
| 31 | 255 | 265 | 11 |
| 32 | 289 | 289 | 1  |
| 33 | 306 | 306 | 1  |
| 34 | 310 | 311 | 2  |
| 35 | 313 | 314 | 2  |
| 36 | 318 | 331 | 14 |
| 37 | 333 | 333 | 1  |
| 38 | 352 | 352 | 1  |
| 39 | 356 | 356 | 1  |
| 40 | 358 | 364 | 7  |
| 41 | 366 | 369 | 4  |
| 42 | 377 | 381 | 5  |
| 43 | 383 | 383 | 1  |
| 44 | 385 | 388 | 4  |
| 45 | 394 | 394 | 1  |
| 46 | 408 | 409 | 2  |
| 47 | 412 | 412 | 1  |
| 48 | 414 | 421 | 8  |
| 49 | 426 | 426 | 1  |
| 50 | 428 | 428 | 1  |
| 51 | 437 | 450 | 14 |
| 52 | 457 | 457 | 1  |
| 53 | 501 | 501 | 1  |
| 54 | 504 | 504 | 1  |

# 222 positions (cumulative volume <= 57 Angstrom^3)

|   | start | end | length |
|---|-------|-----|--------|
| 1 | 1     | 1   | 1      |
| 2 | 3     | 3   | 1      |
| 3 | 8     | 22  | 15     |
| 4 | 28    | 28  | 1      |
| 5 | 31    | 31  | 1      |
| 6 | 33    | 38  | 6      |
| 7 | 42    | 51  | 10     |
| 8 | 54    | 74  | 21     |
| 9 | 78    | 78  | 1      |

Supplementary Text 2

|    |     |     |    |
|----|-----|-----|----|
| 10 | 84  | 84  | 1  |
| 11 | 86  | 86  | 1  |
| 12 | 88  | 110 | 23 |
| 13 | 112 | 113 | 2  |
| 14 | 115 | 115 | 1  |
| 15 | 117 | 117 | 1  |
| 16 | 121 | 124 | 4  |
| 17 | 126 | 126 | 1  |
| 18 | 130 | 130 | 1  |
| 19 | 135 | 136 | 2  |
| 20 | 138 | 140 | 3  |
| 21 | 148 | 148 | 1  |
| 22 | 150 | 165 | 16 |
| 23 | 167 | 167 | 1  |
| 24 | 175 | 178 | 4  |
| 25 | 180 | 182 | 3  |
| 26 | 189 | 189 | 1  |
| 27 | 214 | 221 | 8  |
| 28 | 234 | 234 | 1  |
| 29 | 240 | 240 | 1  |
| 30 | 251 | 253 | 3  |
| 31 | 255 | 265 | 11 |
| 32 | 289 | 289 | 1  |
| 33 | 306 | 306 | 1  |
| 34 | 310 | 311 | 2  |
| 35 | 313 | 314 | 2  |
| 36 | 318 | 331 | 14 |
| 37 | 333 | 333 | 1  |
| 38 | 352 | 352 | 1  |
| 39 | 356 | 356 | 1  |
| 40 | 358 | 364 | 7  |
| 41 | 366 | 369 | 4  |
| 42 | 377 | 381 | 5  |
| 43 | 383 | 383 | 1  |
| 44 | 385 | 388 | 4  |
| 45 | 394 | 394 | 1  |
| 46 | 408 | 409 | 2  |
| 47 | 412 | 412 | 1  |
| 48 | 414 | 421 | 8  |
| 49 | 426 | 426 | 1  |
| 50 | 428 | 428 | 1  |
| 51 | 437 | 450 | 14 |
| 52 | 457 | 457 | 1  |
| 53 | 501 | 501 | 1  |
| 54 | 504 | 504 | 1  |

# 223 positions (cumulative volume <= 58 Angstrom^3)

|   | start | end | length |
|---|-------|-----|--------|
| 1 | 1     | 3   | 3      |
| 2 | 8     | 22  | 15     |
| 3 | 28    | 28  | 1      |

Supplementary Text 2

|    |     |     |    |
|----|-----|-----|----|
| 4  | 31  | 31  | 1  |
| 5  | 33  | 38  | 6  |
| 6  | 42  | 51  | 10 |
| 7  | 54  | 74  | 21 |
| 8  | 78  | 78  | 1  |
| 9  | 84  | 84  | 1  |
| 10 | 86  | 86  | 1  |
| 11 | 88  | 110 | 23 |
| 12 | 112 | 113 | 2  |
| 13 | 115 | 115 | 1  |
| 14 | 117 | 117 | 1  |
| 15 | 121 | 124 | 4  |
| 16 | 126 | 126 | 1  |
| 17 | 130 | 130 | 1  |
| 18 | 135 | 136 | 2  |
| 19 | 138 | 140 | 3  |
| 20 | 148 | 148 | 1  |
| 21 | 150 | 165 | 16 |
| 22 | 167 | 167 | 1  |
| 23 | 175 | 178 | 4  |
| 24 | 180 | 182 | 3  |
| 25 | 189 | 189 | 1  |
| 26 | 214 | 221 | 8  |
| 27 | 234 | 234 | 1  |
| 28 | 240 | 240 | 1  |
| 29 | 251 | 253 | 3  |
| 30 | 255 | 265 | 11 |
| 31 | 289 | 289 | 1  |
| 32 | 306 | 306 | 1  |
| 33 | 310 | 311 | 2  |
| 34 | 313 | 314 | 2  |
| 35 | 318 | 331 | 14 |
| 36 | 333 | 333 | 1  |
| 37 | 352 | 352 | 1  |
| 38 | 356 | 356 | 1  |
| 39 | 358 | 364 | 7  |
| 40 | 366 | 369 | 4  |
| 41 | 377 | 381 | 5  |
| 42 | 383 | 383 | 1  |
| 43 | 385 | 388 | 4  |
| 44 | 394 | 394 | 1  |
| 45 | 408 | 409 | 2  |
| 46 | 412 | 412 | 1  |
| 47 | 414 | 421 | 8  |
| 48 | 426 | 426 | 1  |
| 49 | 428 | 428 | 1  |
| 50 | 437 | 450 | 14 |
| 51 | 457 | 457 | 1  |
| 52 | 501 | 501 | 1  |
| 53 | 504 | 504 | 1  |

Supplementary Text 2

# 224 positions (cumulative volume <= 59 Angstrom^3)

|    | start | end | length |
|----|-------|-----|--------|
| 1  | 1     | 3   | 3      |
| 2  | 8     | 22  | 15     |
| 3  | 28    | 28  | 1      |
| 4  | 31    | 31  | 1      |
| 5  | 33    | 38  | 6      |
| 6  | 42    | 51  | 10     |
| 7  | 54    | 74  | 21     |
| 8  | 78    | 78  | 1      |
| 9  | 81    | 81  | 1      |
| 10 | 84    | 84  | 1      |
| 11 | 86    | 86  | 1      |
| 12 | 88    | 110 | 23     |
| 13 | 112   | 113 | 2      |
| 14 | 115   | 115 | 1      |
| 15 | 117   | 117 | 1      |
| 16 | 121   | 124 | 4      |
| 17 | 126   | 126 | 1      |
| 18 | 130   | 130 | 1      |
| 19 | 135   | 136 | 2      |
| 20 | 138   | 140 | 3      |
| 21 | 148   | 148 | 1      |
| 22 | 150   | 165 | 16     |
| 23 | 167   | 167 | 1      |
| 24 | 175   | 178 | 4      |
| 25 | 180   | 182 | 3      |
| 26 | 189   | 189 | 1      |
| 27 | 214   | 221 | 8      |
| 28 | 234   | 234 | 1      |
| 29 | 240   | 240 | 1      |
| 30 | 251   | 253 | 3      |
| 31 | 255   | 265 | 11     |
| 32 | 289   | 289 | 1      |
| 33 | 306   | 306 | 1      |
| 34 | 310   | 311 | 2      |
| 35 | 313   | 314 | 2      |
| 36 | 318   | 331 | 14     |
| 37 | 333   | 333 | 1      |
| 38 | 352   | 352 | 1      |
| 39 | 356   | 356 | 1      |
| 40 | 358   | 364 | 7      |
| 41 | 366   | 369 | 4      |
| 42 | 377   | 381 | 5      |
| 43 | 383   | 383 | 1      |
| 44 | 385   | 388 | 4      |
| 45 | 394   | 394 | 1      |
| 46 | 408   | 409 | 2      |
| 47 | 412   | 412 | 1      |
| 48 | 414   | 421 | 8      |



Supplementary Text 2

|                                                      |       |     |        |
|------------------------------------------------------|-------|-----|--------|
| 49                                                   | 426   | 426 | 1      |
| 50                                                   | 428   | 428 | 1      |
| 51                                                   | 437   | 450 | 14     |
| 52                                                   | 457   | 457 | 1      |
| 53                                                   | 501   | 501 | 1      |
| 54                                                   | 504   | 504 | 1      |
| # 224 positions (cumulative volume <= 60 Angstrom^3) |       |     |        |
|                                                      | start | end | length |
| 1                                                    | 1     | 3   | 3      |
| 2                                                    | 8     | 22  | 15     |
| 3                                                    | 28    | 28  | 1      |
| 4                                                    | 31    | 31  | 1      |
| 5                                                    | 33    | 38  | 6      |
| 6                                                    | 42    | 51  | 10     |
| 7                                                    | 54    | 74  | 21     |
| 8                                                    | 78    | 78  | 1      |
| 9                                                    | 81    | 81  | 1      |
| 10                                                   | 84    | 84  | 1      |
| 11                                                   | 86    | 86  | 1      |
| 12                                                   | 88    | 110 | 23     |
| 13                                                   | 112   | 113 | 2      |
| 14                                                   | 115   | 115 | 1      |
| 15                                                   | 117   | 117 | 1      |
| 16                                                   | 121   | 124 | 4      |
| 17                                                   | 126   | 126 | 1      |
| 18                                                   | 130   | 130 | 1      |
| 19                                                   | 135   | 136 | 2      |
| 20                                                   | 138   | 140 | 3      |
| 21                                                   | 148   | 148 | 1      |
| 22                                                   | 150   | 165 | 16     |
| 23                                                   | 167   | 167 | 1      |
| 24                                                   | 175   | 178 | 4      |
| 25                                                   | 180   | 182 | 3      |
| 26                                                   | 189   | 189 | 1      |
| 27                                                   | 214   | 221 | 8      |
| 28                                                   | 234   | 234 | 1      |
| 29                                                   | 240   | 240 | 1      |
| 30                                                   | 251   | 253 | 3      |
| 31                                                   | 255   | 265 | 11     |
| 32                                                   | 289   | 289 | 1      |
| 33                                                   | 306   | 306 | 1      |
| 34                                                   | 310   | 311 | 2      |
| 35                                                   | 313   | 314 | 2      |
| 36                                                   | 318   | 331 | 14     |
| 37                                                   | 333   | 333 | 1      |
| 38                                                   | 352   | 352 | 1      |
| 39                                                   | 356   | 356 | 1      |
| 40                                                   | 358   | 364 | 7      |
| 41                                                   | 366   | 369 | 4      |
| 42                                                   | 377   | 381 | 5      |

Supplementary Text 2

|    |     |     |    |
|----|-----|-----|----|
| 43 | 383 | 383 | 1  |
| 44 | 385 | 388 | 4  |
| 45 | 394 | 394 | 1  |
| 46 | 408 | 409 | 2  |
| 47 | 412 | 412 | 1  |
| 48 | 414 | 421 | 8  |
| 49 | 426 | 426 | 1  |
| 50 | 428 | 428 | 1  |
| 51 | 437 | 450 | 14 |
| 52 | 457 | 457 | 1  |
| 53 | 501 | 501 | 1  |
| 54 | 504 | 504 | 1  |

# 226 positions (cumulative volume <= 61 Angstrom^3)

|    | start | end | length |
|----|-------|-----|--------|
| 1  | 1     | 3   | 3      |
| 2  | 8     | 22  | 15     |
| 3  | 28    | 28  | 1      |
| 4  | 31    | 31  | 1      |
| 5  | 33    | 38  | 6      |
| 6  | 42    | 51  | 10     |
| 7  | 54    | 74  | 21     |
| 8  | 77    | 78  | 2      |
| 9  | 81    | 81  | 1      |
| 10 | 84    | 84  | 1      |
| 11 | 86    | 86  | 1      |
| 12 | 88    | 110 | 23     |
| 13 | 112   | 113 | 2      |
| 14 | 115   | 115 | 1      |
| 15 | 117   | 117 | 1      |
| 16 | 121   | 124 | 4      |
| 17 | 126   | 126 | 1      |
| 18 | 130   | 130 | 1      |
| 19 | 135   | 136 | 2      |
| 20 | 138   | 140 | 3      |
| 21 | 148   | 148 | 1      |
| 22 | 150   | 165 | 16     |
| 23 | 167   | 167 | 1      |
| 24 | 175   | 178 | 4      |
| 25 | 180   | 182 | 3      |
| 26 | 189   | 189 | 1      |
| 27 | 214   | 221 | 8      |
| 28 | 234   | 234 | 1      |
| 29 | 240   | 240 | 1      |
| 30 | 251   | 253 | 3      |
| 31 | 255   | 265 | 11     |
| 32 | 289   | 289 | 1      |
| 33 | 306   | 306 | 1      |
| 34 | 310   | 311 | 2      |
| 35 | 313   | 314 | 2      |
| 36 | 318   | 331 | 14     |

Supplementary Text 2

|    |     |     |    |
|----|-----|-----|----|
| 37 | 333 | 333 | 1  |
| 38 | 352 | 352 | 1  |
| 39 | 356 | 356 | 1  |
| 40 | 358 | 364 | 7  |
| 41 | 366 | 370 | 5  |
| 42 | 377 | 381 | 5  |
| 43 | 383 | 383 | 1  |
| 44 | 385 | 388 | 4  |
| 45 | 394 | 394 | 1  |
| 46 | 408 | 409 | 2  |
| 47 | 412 | 412 | 1  |
| 48 | 414 | 421 | 8  |
| 49 | 426 | 426 | 1  |
| 50 | 428 | 428 | 1  |
| 51 | 437 | 450 | 14 |
| 52 | 457 | 457 | 1  |
| 53 | 501 | 501 | 1  |
| 54 | 504 | 504 | 1  |

# 227 positions (cumulative volume <= 62 Angstrom^3)

|    | start | end | length |
|----|-------|-----|--------|
| 1  | 1     | 3   | 3      |
| 2  | 5     | 5   | 1      |
| 3  | 8     | 22  | 15     |
| 4  | 28    | 28  | 1      |
| 5  | 31    | 31  | 1      |
| 6  | 33    | 38  | 6      |
| 7  | 42    | 51  | 10     |
| 8  | 54    | 74  | 21     |
| 9  | 77    | 78  | 2      |
| 10 | 81    | 81  | 1      |
| 11 | 84    | 84  | 1      |
| 12 | 86    | 86  | 1      |
| 13 | 88    | 110 | 23     |
| 14 | 112   | 113 | 2      |
| 15 | 115   | 115 | 1      |
| 16 | 117   | 117 | 1      |
| 17 | 121   | 124 | 4      |
| 18 | 126   | 126 | 1      |
| 19 | 130   | 130 | 1      |
| 20 | 135   | 136 | 2      |
| 21 | 138   | 140 | 3      |
| 22 | 148   | 148 | 1      |
| 23 | 150   | 165 | 16     |
| 24 | 167   | 167 | 1      |
| 25 | 175   | 178 | 4      |
| 26 | 180   | 182 | 3      |
| 27 | 189   | 189 | 1      |
| 28 | 214   | 221 | 8      |
| 29 | 234   | 234 | 1      |
| 30 | 240   | 240 | 1      |

Supplementary Text 2

|    |     |     |    |
|----|-----|-----|----|
| 31 | 251 | 253 | 3  |
| 32 | 255 | 265 | 11 |
| 33 | 289 | 289 | 1  |
| 34 | 306 | 306 | 1  |
| 35 | 310 | 311 | 2  |
| 36 | 313 | 314 | 2  |
| 37 | 318 | 331 | 14 |
| 38 | 333 | 333 | 1  |
| 39 | 352 | 352 | 1  |
| 40 | 356 | 356 | 1  |
| 41 | 358 | 364 | 7  |
| 42 | 366 | 370 | 5  |
| 43 | 377 | 381 | 5  |
| 44 | 383 | 383 | 1  |
| 45 | 385 | 388 | 4  |
| 46 | 394 | 394 | 1  |
| 47 | 408 | 409 | 2  |
| 48 | 412 | 412 | 1  |
| 49 | 414 | 421 | 8  |
| 50 | 426 | 426 | 1  |
| 51 | 428 | 428 | 1  |
| 52 | 437 | 450 | 14 |
| 53 | 457 | 457 | 1  |
| 54 | 501 | 501 | 1  |
| 55 | 504 | 504 | 1  |

# 227 positions (cumulative volume <= 63 Angstrom^3)

|    | start | end | length |
|----|-------|-----|--------|
| 1  | 1     | 3   | 3      |
| 2  | 5     | 5   | 1      |
| 3  | 8     | 22  | 15     |
| 4  | 28    | 28  | 1      |
| 5  | 31    | 31  | 1      |
| 6  | 33    | 38  | 6      |
| 7  | 42    | 51  | 10     |
| 8  | 54    | 74  | 21     |
| 9  | 77    | 78  | 2      |
| 10 | 81    | 81  | 1      |
| 11 | 84    | 84  | 1      |
| 12 | 86    | 86  | 1      |
| 13 | 88    | 110 | 23     |
| 14 | 112   | 113 | 2      |
| 15 | 115   | 115 | 1      |
| 16 | 117   | 117 | 1      |
| 17 | 121   | 124 | 4      |
| 18 | 126   | 126 | 1      |
| 19 | 130   | 130 | 1      |
| 20 | 135   | 136 | 2      |
| 21 | 138   | 140 | 3      |
| 22 | 148   | 148 | 1      |
| 23 | 150   | 165 | 16     |

Supplementary Text 2

|    |     |     |    |
|----|-----|-----|----|
| 24 | 167 | 167 | 1  |
| 25 | 175 | 178 | 4  |
| 26 | 180 | 182 | 3  |
| 27 | 189 | 189 | 1  |
| 28 | 214 | 221 | 8  |
| 29 | 234 | 234 | 1  |
| 30 | 240 | 240 | 1  |
| 31 | 251 | 253 | 3  |
| 32 | 255 | 265 | 11 |
| 33 | 289 | 289 | 1  |
| 34 | 306 | 306 | 1  |
| 35 | 310 | 311 | 2  |
| 36 | 313 | 314 | 2  |
| 37 | 318 | 331 | 14 |
| 38 | 333 | 333 | 1  |
| 39 | 352 | 352 | 1  |
| 40 | 356 | 356 | 1  |
| 41 | 358 | 364 | 7  |
| 42 | 366 | 370 | 5  |
| 43 | 377 | 381 | 5  |
| 44 | 383 | 383 | 1  |
| 45 | 385 | 388 | 4  |
| 46 | 394 | 394 | 1  |
| 47 | 408 | 409 | 2  |
| 48 | 412 | 412 | 1  |
| 49 | 414 | 421 | 8  |
| 50 | 426 | 426 | 1  |
| 51 | 428 | 428 | 1  |
| 52 | 437 | 450 | 14 |
| 53 | 457 | 457 | 1  |
| 54 | 501 | 501 | 1  |
| 55 | 504 | 504 | 1  |

# 229 positions (cumulative volume <= 64 Angstrom^3)

|    | start | end | length |
|----|-------|-----|--------|
| 1  | 1     | 3   | 3      |
| 2  | 5     | 5   | 1      |
| 3  | 8     | 22  | 15     |
| 4  | 28    | 28  | 1      |
| 5  | 31    | 31  | 1      |
| 6  | 33    | 38  | 6      |
| 7  | 42    | 51  | 10     |
| 8  | 54    | 74  | 21     |
| 9  | 77    | 78  | 2      |
| 10 | 81    | 81  | 1      |
| 11 | 84    | 84  | 1      |
| 12 | 86    | 86  | 1      |
| 13 | 88    | 110 | 23     |
| 14 | 112   | 113 | 2      |
| 15 | 115   | 115 | 1      |
| 16 | 117   | 117 | 1      |

Supplementary Text 2

|                                                      |       |     |        |
|------------------------------------------------------|-------|-----|--------|
| 17                                                   | 121   | 124 | 4      |
| 18                                                   | 126   | 126 | 1      |
| 19                                                   | 130   | 130 | 1      |
| 20                                                   | 135   | 136 | 2      |
| 21                                                   | 138   | 140 | 3      |
| 22                                                   | 148   | 148 | 1      |
| 23                                                   | 150   | 165 | 16     |
| 24                                                   | 167   | 167 | 1      |
| 25                                                   | 175   | 178 | 4      |
| 26                                                   | 180   | 182 | 3      |
| 27                                                   | 189   | 189 | 1      |
| 28                                                   | 214   | 221 | 8      |
| 29                                                   | 223   | 223 | 1      |
| 30                                                   | 234   | 234 | 1      |
| 31                                                   | 240   | 240 | 1      |
| 32                                                   | 251   | 253 | 3      |
| 33                                                   | 255   | 265 | 11     |
| 34                                                   | 288   | 289 | 2      |
| 35                                                   | 306   | 306 | 1      |
| 36                                                   | 310   | 311 | 2      |
| 37                                                   | 313   | 314 | 2      |
| 38                                                   | 318   | 331 | 14     |
| 39                                                   | 333   | 333 | 1      |
| 40                                                   | 352   | 352 | 1      |
| 41                                                   | 356   | 356 | 1      |
| 42                                                   | 358   | 364 | 7      |
| 43                                                   | 366   | 370 | 5      |
| 44                                                   | 377   | 381 | 5      |
| 45                                                   | 383   | 383 | 1      |
| 46                                                   | 385   | 388 | 4      |
| 47                                                   | 394   | 394 | 1      |
| 48                                                   | 408   | 409 | 2      |
| 49                                                   | 412   | 412 | 1      |
| 50                                                   | 414   | 421 | 8      |
| 51                                                   | 426   | 426 | 1      |
| 52                                                   | 428   | 428 | 1      |
| 53                                                   | 437   | 450 | 14     |
| 54                                                   | 457   | 457 | 1      |
| 55                                                   | 501   | 501 | 1      |
| 56                                                   | 504   | 504 | 1      |
| # 230 positions (cumulative volume <= 65 Angstrom^3) |       |     |        |
|                                                      | start | end | length |
| 1                                                    | 1     | 3   | 3      |
| 2                                                    | 5     | 5   | 1      |
| 3                                                    | 8     | 22  | 15     |
| 4                                                    | 28    | 28  | 1      |
| 5                                                    | 31    | 31  | 1      |
| 6                                                    | 33    | 38  | 6      |
| 7                                                    | 42    | 51  | 10     |
| 8                                                    | 54    | 74  | 21     |

Supplementary Text 2

|    |     |     |    |
|----|-----|-----|----|
| 9  | 77  | 78  | 2  |
| 10 | 81  | 81  | 1  |
| 11 | 84  | 84  | 1  |
| 12 | 86  | 86  | 1  |
| 13 | 88  | 110 | 23 |
| 14 | 112 | 113 | 2  |
| 15 | 115 | 115 | 1  |
| 16 | 117 | 117 | 1  |
| 17 | 121 | 124 | 4  |
| 18 | 126 | 126 | 1  |
| 19 | 130 | 130 | 1  |
| 20 | 135 | 136 | 2  |
| 21 | 138 | 140 | 3  |
| 22 | 148 | 148 | 1  |
| 23 | 150 | 165 | 16 |
| 24 | 167 | 167 | 1  |
| 25 | 175 | 178 | 4  |
| 26 | 180 | 182 | 3  |
| 27 | 189 | 189 | 1  |
| 28 | 214 | 223 | 10 |
| 29 | 234 | 234 | 1  |
| 30 | 240 | 240 | 1  |
| 31 | 251 | 253 | 3  |
| 32 | 255 | 265 | 11 |
| 33 | 288 | 289 | 2  |
| 34 | 306 | 306 | 1  |
| 35 | 310 | 311 | 2  |
| 36 | 313 | 314 | 2  |
| 37 | 318 | 331 | 14 |
| 38 | 333 | 333 | 1  |
| 39 | 352 | 352 | 1  |
| 40 | 356 | 356 | 1  |
| 41 | 358 | 364 | 7  |
| 42 | 366 | 370 | 5  |
| 43 | 377 | 381 | 5  |
| 44 | 383 | 383 | 1  |
| 45 | 385 | 388 | 4  |
| 46 | 394 | 394 | 1  |
| 47 | 408 | 409 | 2  |
| 48 | 412 | 412 | 1  |
| 49 | 414 | 421 | 8  |
| 50 | 426 | 426 | 1  |
| 51 | 428 | 428 | 1  |
| 52 | 437 | 450 | 14 |
| 53 | 457 | 457 | 1  |
| 54 | 501 | 501 | 1  |
| 55 | 504 | 504 | 1  |

# 232 positions (cumulative volume <= 66 Angstrom^3)

|   | start | end | length |
|---|-------|-----|--------|
| 1 | 1     | 3   | 3      |

Supplementary Text 2

|    |     |     |    |
|----|-----|-----|----|
| 2  | 5   | 5   | 1  |
| 3  | 8   | 22  | 15 |
| 4  | 28  | 28  | 1  |
| 5  | 31  | 31  | 1  |
| 6  | 33  | 38  | 6  |
| 7  | 42  | 51  | 10 |
| 8  | 54  | 74  | 21 |
| 9  | 77  | 78  | 2  |
| 10 | 81  | 81  | 1  |
| 11 | 84  | 84  | 1  |
| 12 | 86  | 86  | 1  |
| 13 | 88  | 110 | 23 |
| 14 | 112 | 113 | 2  |
| 15 | 115 | 115 | 1  |
| 16 | 117 | 117 | 1  |
| 17 | 121 | 124 | 4  |
| 18 | 126 | 126 | 1  |
| 19 | 130 | 130 | 1  |
| 20 | 135 | 136 | 2  |
| 21 | 138 | 140 | 3  |
| 22 | 148 | 148 | 1  |
| 23 | 150 | 165 | 16 |
| 24 | 167 | 167 | 1  |
| 25 | 175 | 182 | 8  |
| 26 | 189 | 189 | 1  |
| 27 | 212 | 212 | 1  |
| 28 | 214 | 223 | 10 |
| 29 | 234 | 234 | 1  |
| 30 | 240 | 240 | 1  |
| 31 | 251 | 253 | 3  |
| 32 | 255 | 265 | 11 |
| 33 | 288 | 289 | 2  |
| 34 | 306 | 306 | 1  |
| 35 | 310 | 311 | 2  |
| 36 | 313 | 314 | 2  |
| 37 | 318 | 331 | 14 |
| 38 | 333 | 333 | 1  |
| 39 | 352 | 352 | 1  |
| 40 | 356 | 356 | 1  |
| 41 | 358 | 364 | 7  |
| 42 | 366 | 370 | 5  |
| 43 | 377 | 381 | 5  |
| 44 | 383 | 383 | 1  |
| 45 | 385 | 388 | 4  |
| 46 | 394 | 394 | 1  |
| 47 | 408 | 409 | 2  |
| 48 | 412 | 412 | 1  |
| 49 | 414 | 421 | 8  |
| 50 | 426 | 426 | 1  |
| 51 | 428 | 428 | 1  |



Supplementary Text 2

|                                                      |       |     |        |
|------------------------------------------------------|-------|-----|--------|
| 52                                                   | 437   | 450 | 14     |
| 53                                                   | 457   | 457 | 1      |
| 54                                                   | 501   | 501 | 1      |
| 55                                                   | 504   | 504 | 1      |
| # 233 positions (cumulative volume <= 67 Angstrom^3) |       |     |        |
|                                                      | start | end | length |
| 1                                                    | 1     | 3   | 3      |
| 2                                                    | 5     | 5   | 1      |
| 3                                                    | 8     | 22  | 15     |
| 4                                                    | 28    | 28  | 1      |
| 5                                                    | 31    | 31  | 1      |
| 6                                                    | 33    | 38  | 6      |
| 7                                                    | 42    | 51  | 10     |
| 8                                                    | 54    | 74  | 21     |
| 9                                                    | 77    | 78  | 2      |
| 10                                                   | 81    | 81  | 1      |
| 11                                                   | 84    | 84  | 1      |
| 12                                                   | 86    | 86  | 1      |
| 13                                                   | 88    | 110 | 23     |
| 14                                                   | 112   | 113 | 2      |
| 15                                                   | 115   | 115 | 1      |
| 16                                                   | 117   | 117 | 1      |
| 17                                                   | 121   | 124 | 4      |
| 18                                                   | 126   | 126 | 1      |
| 19                                                   | 130   | 130 | 1      |
| 20                                                   | 135   | 136 | 2      |
| 21                                                   | 138   | 140 | 3      |
| 22                                                   | 148   | 148 | 1      |
| 23                                                   | 150   | 165 | 16     |
| 24                                                   | 167   | 167 | 1      |
| 25                                                   | 175   | 182 | 8      |
| 26                                                   | 189   | 189 | 1      |
| 27                                                   | 212   | 212 | 1      |
| 28                                                   | 214   | 224 | 11     |
| 29                                                   | 234   | 234 | 1      |
| 30                                                   | 240   | 240 | 1      |
| 31                                                   | 251   | 253 | 3      |
| 32                                                   | 255   | 265 | 11     |
| 33                                                   | 288   | 289 | 2      |
| 34                                                   | 306   | 306 | 1      |
| 35                                                   | 310   | 311 | 2      |
| 36                                                   | 313   | 314 | 2      |
| 37                                                   | 318   | 331 | 14     |
| 38                                                   | 333   | 333 | 1      |
| 39                                                   | 352   | 352 | 1      |
| 40                                                   | 356   | 356 | 1      |
| 41                                                   | 358   | 364 | 7      |
| 42                                                   | 366   | 370 | 5      |
| 43                                                   | 377   | 381 | 5      |
| 44                                                   | 383   | 383 | 1      |

Supplementary Text 2

|                                                      |       |     |        |
|------------------------------------------------------|-------|-----|--------|
| 45                                                   | 385   | 388 | 4      |
| 46                                                   | 394   | 394 | 1      |
| 47                                                   | 408   | 409 | 2      |
| 48                                                   | 412   | 412 | 1      |
| 49                                                   | 414   | 421 | 8      |
| 50                                                   | 426   | 426 | 1      |
| 51                                                   | 428   | 428 | 1      |
| 52                                                   | 437   | 450 | 14     |
| 53                                                   | 457   | 457 | 1      |
| 54                                                   | 501   | 501 | 1      |
| 55                                                   | 504   | 504 | 1      |
| # 234 positions (cumulative volume <= 68 Angstrom^3) |       |     |        |
|                                                      | start | end | length |
| 1                                                    | 1     | 3   | 3      |
| 2                                                    | 5     | 5   | 1      |
| 3                                                    | 8     | 22  | 15     |
| 4                                                    | 28    | 28  | 1      |
| 5                                                    | 31    | 31  | 1      |
| 6                                                    | 33    | 38  | 6      |
| 7                                                    | 42    | 51  | 10     |
| 8                                                    | 54    | 74  | 21     |
| 9                                                    | 77    | 78  | 2      |
| 10                                                   | 81    | 81  | 1      |
| 11                                                   | 84    | 84  | 1      |
| 12                                                   | 86    | 86  | 1      |
| 13                                                   | 88    | 110 | 23     |
| 14                                                   | 112   | 113 | 2      |
| 15                                                   | 115   | 115 | 1      |
| 16                                                   | 117   | 117 | 1      |
| 17                                                   | 121   | 124 | 4      |
| 18                                                   | 126   | 126 | 1      |
| 19                                                   | 130   | 130 | 1      |
| 20                                                   | 135   | 136 | 2      |
| 21                                                   | 138   | 140 | 3      |
| 22                                                   | 148   | 148 | 1      |
| 23                                                   | 150   | 165 | 16     |
| 24                                                   | 167   | 167 | 1      |
| 25                                                   | 175   | 182 | 8      |
| 26                                                   | 184   | 184 | 1      |
| 27                                                   | 189   | 189 | 1      |
| 28                                                   | 212   | 212 | 1      |
| 29                                                   | 214   | 224 | 11     |
| 30                                                   | 234   | 234 | 1      |
| 31                                                   | 240   | 240 | 1      |
| 32                                                   | 251   | 253 | 3      |
| 33                                                   | 255   | 265 | 11     |
| 34                                                   | 288   | 289 | 2      |
| 35                                                   | 306   | 306 | 1      |
| 36                                                   | 310   | 311 | 2      |
| 37                                                   | 313   | 314 | 2      |

Supplementary Text 2

|    |     |     |    |
|----|-----|-----|----|
| 38 | 318 | 331 | 14 |
| 39 | 333 | 333 | 1  |
| 40 | 352 | 352 | 1  |
| 41 | 356 | 356 | 1  |
| 42 | 358 | 364 | 7  |
| 43 | 366 | 370 | 5  |
| 44 | 377 | 381 | 5  |
| 45 | 383 | 383 | 1  |
| 46 | 385 | 388 | 4  |
| 47 | 394 | 394 | 1  |
| 48 | 408 | 409 | 2  |
| 49 | 412 | 412 | 1  |
| 50 | 414 | 421 | 8  |
| 51 | 426 | 426 | 1  |
| 52 | 428 | 428 | 1  |
| 53 | 437 | 450 | 14 |
| 54 | 457 | 457 | 1  |
| 55 | 501 | 501 | 1  |
| 56 | 504 | 504 | 1  |

# 235 positions (cumulative volume <= 69 Angstrom^3)

|    | start | end | length |
|----|-------|-----|--------|
| 1  | 1     | 3   | 3      |
| 2  | 5     | 6   | 2      |
| 3  | 8     | 22  | 15     |
| 4  | 28    | 28  | 1      |
| 5  | 31    | 31  | 1      |
| 6  | 33    | 38  | 6      |
| 7  | 42    | 51  | 10     |
| 8  | 54    | 74  | 21     |
| 9  | 77    | 78  | 2      |
| 10 | 81    | 81  | 1      |
| 11 | 84    | 84  | 1      |
| 12 | 86    | 86  | 1      |
| 13 | 88    | 110 | 23     |
| 14 | 112   | 113 | 2      |
| 15 | 115   | 115 | 1      |
| 16 | 117   | 117 | 1      |
| 17 | 121   | 124 | 4      |
| 18 | 126   | 126 | 1      |
| 19 | 130   | 130 | 1      |
| 20 | 135   | 136 | 2      |
| 21 | 138   | 140 | 3      |
| 22 | 148   | 148 | 1      |
| 23 | 150   | 165 | 16     |
| 24 | 167   | 167 | 1      |
| 25 | 175   | 182 | 8      |
| 26 | 184   | 184 | 1      |
| 27 | 189   | 189 | 1      |
| 28 | 212   | 212 | 1      |
| 29 | 214   | 224 | 11     |

Supplementary Text 2

|    |     |     |    |
|----|-----|-----|----|
| 30 | 234 | 234 | 1  |
| 31 | 240 | 240 | 1  |
| 32 | 251 | 253 | 3  |
| 33 | 255 | 265 | 11 |
| 34 | 288 | 289 | 2  |
| 35 | 306 | 306 | 1  |
| 36 | 310 | 311 | 2  |
| 37 | 313 | 314 | 2  |
| 38 | 318 | 331 | 14 |
| 39 | 333 | 333 | 1  |
| 40 | 352 | 352 | 1  |
| 41 | 356 | 356 | 1  |
| 42 | 358 | 364 | 7  |
| 43 | 366 | 370 | 5  |
| 44 | 377 | 381 | 5  |
| 45 | 383 | 383 | 1  |
| 46 | 385 | 388 | 4  |
| 47 | 394 | 394 | 1  |
| 48 | 408 | 409 | 2  |
| 49 | 412 | 412 | 1  |
| 50 | 414 | 421 | 8  |
| 51 | 426 | 426 | 1  |
| 52 | 428 | 428 | 1  |
| 53 | 437 | 450 | 14 |
| 54 | 457 | 457 | 1  |
| 55 | 501 | 501 | 1  |
| 56 | 504 | 504 | 1  |

# 236 positions (cumulative volume <= 70 Angstrom^3)

|    | start | end | length |
|----|-------|-----|--------|
| 1  | 1     | 6   | 6      |
| 2  | 8     | 22  | 15     |
| 3  | 28    | 28  | 1      |
| 4  | 31    | 31  | 1      |
| 5  | 33    | 38  | 6      |
| 6  | 42    | 51  | 10     |
| 7  | 54    | 74  | 21     |
| 8  | 77    | 78  | 2      |
| 9  | 81    | 81  | 1      |
| 10 | 84    | 84  | 1      |
| 11 | 86    | 86  | 1      |
| 12 | 88    | 110 | 23     |
| 13 | 112   | 113 | 2      |
| 14 | 115   | 115 | 1      |
| 15 | 117   | 117 | 1      |
| 16 | 121   | 124 | 4      |
| 17 | 126   | 126 | 1      |
| 18 | 130   | 130 | 1      |
| 19 | 135   | 136 | 2      |
| 20 | 138   | 140 | 3      |
| 21 | 148   | 148 | 1      |

Supplementary Text 2

|    |     |     |    |
|----|-----|-----|----|
| 22 | 150 | 165 | 16 |
| 23 | 167 | 167 | 1  |
| 24 | 175 | 182 | 8  |
| 25 | 184 | 184 | 1  |
| 26 | 189 | 189 | 1  |
| 27 | 212 | 212 | 1  |
| 28 | 214 | 224 | 11 |
| 29 | 234 | 234 | 1  |
| 30 | 240 | 240 | 1  |
| 31 | 251 | 253 | 3  |
| 32 | 255 | 265 | 11 |
| 33 | 288 | 289 | 2  |
| 34 | 306 | 306 | 1  |
| 35 | 310 | 311 | 2  |
| 36 | 313 | 314 | 2  |
| 37 | 318 | 331 | 14 |
| 38 | 333 | 333 | 1  |
| 39 | 352 | 352 | 1  |
| 40 | 356 | 356 | 1  |
| 41 | 358 | 364 | 7  |
| 42 | 366 | 370 | 5  |
| 43 | 377 | 381 | 5  |
| 44 | 383 | 383 | 1  |
| 45 | 385 | 388 | 4  |
| 46 | 394 | 394 | 1  |
| 47 | 408 | 409 | 2  |
| 48 | 412 | 412 | 1  |
| 49 | 414 | 421 | 8  |
| 50 | 426 | 426 | 1  |
| 51 | 428 | 428 | 1  |
| 52 | 437 | 450 | 14 |
| 53 | 457 | 457 | 1  |
| 54 | 501 | 501 | 1  |
| 55 | 504 | 504 | 1  |

# 236 positions (cumulative volume <= 71 Angstrom^3)

|    | start | end | length |
|----|-------|-----|--------|
| 1  | 1     | 6   | 6      |
| 2  | 8     | 22  | 15     |
| 3  | 28    | 28  | 1      |
| 4  | 31    | 31  | 1      |
| 5  | 33    | 38  | 6      |
| 6  | 42    | 51  | 10     |
| 7  | 54    | 74  | 21     |
| 8  | 77    | 78  | 2      |
| 9  | 81    | 81  | 1      |
| 10 | 84    | 84  | 1      |
| 11 | 86    | 86  | 1      |
| 12 | 88    | 110 | 23     |
| 13 | 112   | 113 | 2      |
| 14 | 115   | 115 | 1      |

Supplementary Text 2

|    |     |     |    |
|----|-----|-----|----|
| 15 | 117 | 117 | 1  |
| 16 | 121 | 124 | 4  |
| 17 | 126 | 126 | 1  |
| 18 | 130 | 130 | 1  |
| 19 | 135 | 136 | 2  |
| 20 | 138 | 140 | 3  |
| 21 | 148 | 148 | 1  |
| 22 | 150 | 165 | 16 |
| 23 | 167 | 167 | 1  |
| 24 | 175 | 182 | 8  |
| 25 | 184 | 184 | 1  |
| 26 | 189 | 189 | 1  |
| 27 | 212 | 212 | 1  |
| 28 | 214 | 224 | 11 |
| 29 | 234 | 234 | 1  |
| 30 | 240 | 240 | 1  |
| 31 | 251 | 253 | 3  |
| 32 | 255 | 265 | 11 |
| 33 | 288 | 289 | 2  |
| 34 | 306 | 306 | 1  |
| 35 | 310 | 311 | 2  |
| 36 | 313 | 314 | 2  |
| 37 | 318 | 331 | 14 |
| 38 | 333 | 333 | 1  |
| 39 | 352 | 352 | 1  |
| 40 | 356 | 356 | 1  |
| 41 | 358 | 364 | 7  |
| 42 | 366 | 370 | 5  |
| 43 | 377 | 381 | 5  |
| 44 | 383 | 383 | 1  |
| 45 | 385 | 388 | 4  |
| 46 | 394 | 394 | 1  |
| 47 | 408 | 409 | 2  |
| 48 | 412 | 412 | 1  |
| 49 | 414 | 421 | 8  |
| 50 | 426 | 426 | 1  |
| 51 | 428 | 428 | 1  |
| 52 | 437 | 450 | 14 |
| 53 | 457 | 457 | 1  |
| 54 | 501 | 501 | 1  |
| 55 | 504 | 504 | 1  |

# 238 positions (cumulative volume <= 72 Angstrom^3)

|   | start | end | length |
|---|-------|-----|--------|
| 1 | 1     | 22  | 22     |
| 2 | 28    | 28  | 1      |
| 3 | 31    | 31  | 1      |
| 4 | 33    | 38  | 6      |
| 5 | 42    | 51  | 10     |
| 6 | 54    | 74  | 21     |
| 7 | 77    | 78  | 2      |

Supplementary Text 2

|    |     |     |    |
|----|-----|-----|----|
| 8  | 81  | 81  | 1  |
| 9  | 84  | 84  | 1  |
| 10 | 86  | 86  | 1  |
| 11 | 88  | 110 | 23 |
| 12 | 112 | 113 | 2  |
| 13 | 115 | 115 | 1  |
| 14 | 117 | 117 | 1  |
| 15 | 121 | 124 | 4  |
| 16 | 126 | 127 | 2  |
| 17 | 130 | 130 | 1  |
| 18 | 135 | 136 | 2  |
| 19 | 138 | 140 | 3  |
| 20 | 148 | 148 | 1  |
| 21 | 150 | 165 | 16 |
| 22 | 167 | 167 | 1  |
| 23 | 175 | 182 | 8  |
| 24 | 184 | 184 | 1  |
| 25 | 189 | 189 | 1  |
| 26 | 212 | 212 | 1  |
| 27 | 214 | 224 | 11 |
| 28 | 234 | 234 | 1  |
| 29 | 240 | 240 | 1  |
| 30 | 251 | 253 | 3  |
| 31 | 255 | 265 | 11 |
| 32 | 288 | 289 | 2  |
| 33 | 306 | 306 | 1  |
| 34 | 310 | 311 | 2  |
| 35 | 313 | 314 | 2  |
| 36 | 318 | 331 | 14 |
| 37 | 333 | 333 | 1  |
| 38 | 352 | 352 | 1  |
| 39 | 356 | 356 | 1  |
| 40 | 358 | 364 | 7  |
| 41 | 366 | 370 | 5  |
| 42 | 377 | 381 | 5  |
| 43 | 383 | 383 | 1  |
| 44 | 385 | 388 | 4  |
| 45 | 394 | 394 | 1  |
| 46 | 408 | 409 | 2  |
| 47 | 412 | 412 | 1  |
| 48 | 414 | 421 | 8  |
| 49 | 426 | 426 | 1  |
| 50 | 428 | 428 | 1  |
| 51 | 437 | 450 | 14 |
| 52 | 457 | 457 | 1  |
| 53 | 501 | 501 | 1  |
| 54 | 504 | 504 | 1  |

# 240 positions (cumulative volume <= 73 Angstrom^3)

|   | start | end | length |
|---|-------|-----|--------|
| 1 | 1     | 22  | 22     |

Supplementary Text 2

|    |     |     |    |
|----|-----|-----|----|
| 2  | 28  | 28  | 1  |
| 3  | 31  | 31  | 1  |
| 4  | 33  | 38  | 6  |
| 5  | 42  | 51  | 10 |
| 6  | 54  | 74  | 21 |
| 7  | 77  | 78  | 2  |
| 8  | 81  | 81  | 1  |
| 9  | 84  | 84  | 1  |
| 10 | 86  | 86  | 1  |
| 11 | 88  | 110 | 23 |
| 12 | 112 | 113 | 2  |
| 13 | 115 | 115 | 1  |
| 14 | 117 | 117 | 1  |
| 15 | 121 | 124 | 4  |
| 16 | 126 | 127 | 2  |
| 17 | 130 | 130 | 1  |
| 18 | 135 | 136 | 2  |
| 19 | 138 | 140 | 3  |
| 20 | 148 | 148 | 1  |
| 21 | 150 | 165 | 16 |
| 22 | 167 | 167 | 1  |
| 23 | 175 | 182 | 8  |
| 24 | 184 | 184 | 1  |
| 25 | 189 | 189 | 1  |
| 26 | 212 | 212 | 1  |
| 27 | 214 | 224 | 11 |
| 28 | 234 | 234 | 1  |
| 29 | 240 | 240 | 1  |
| 30 | 251 | 253 | 3  |
| 31 | 255 | 265 | 11 |
| 32 | 288 | 289 | 2  |
| 33 | 306 | 306 | 1  |
| 34 | 310 | 311 | 2  |
| 35 | 313 | 314 | 2  |
| 36 | 318 | 331 | 14 |
| 37 | 333 | 333 | 1  |
| 38 | 352 | 352 | 1  |
| 39 | 356 | 356 | 1  |
| 40 | 358 | 364 | 7  |
| 41 | 366 | 370 | 5  |
| 42 | 377 | 381 | 5  |
| 43 | 383 | 383 | 1  |
| 44 | 385 | 388 | 4  |
| 45 | 392 | 392 | 1  |
| 46 | 394 | 394 | 1  |
| 47 | 408 | 409 | 2  |
| 48 | 412 | 412 | 1  |
| 49 | 414 | 421 | 8  |
| 50 | 426 | 426 | 1  |
| 51 | 428 | 428 | 1  |



Supplementary Text 2

|                                                      |       |     |        |
|------------------------------------------------------|-------|-----|--------|
| 52                                                   | 437   | 450 | 14     |
| 53                                                   | 457   | 457 | 1      |
| 54                                                   | 501   | 502 | 2      |
| 55                                                   | 504   | 504 | 1      |
| # 241 positions (cumulative volume <= 74 Angstrom^3) |       |     |        |
|                                                      | start | end | length |
| 1                                                    | 1     | 22  | 22     |
| 2                                                    | 28    | 28  | 1      |
| 3                                                    | 31    | 31  | 1      |
| 4                                                    | 33    | 38  | 6      |
| 5                                                    | 42    | 51  | 10     |
| 6                                                    | 54    | 74  | 21     |
| 7                                                    | 77    | 78  | 2      |
| 8                                                    | 81    | 81  | 1      |
| 9                                                    | 84    | 84  | 1      |
| 10                                                   | 86    | 86  | 1      |
| 11                                                   | 88    | 110 | 23     |
| 12                                                   | 112   | 113 | 2      |
| 13                                                   | 115   | 115 | 1      |
| 14                                                   | 117   | 117 | 1      |
| 15                                                   | 121   | 124 | 4      |
| 16                                                   | 126   | 127 | 2      |
| 17                                                   | 130   | 130 | 1      |
| 18                                                   | 135   | 136 | 2      |
| 19                                                   | 138   | 140 | 3      |
| 20                                                   | 148   | 148 | 1      |
| 21                                                   | 150   | 165 | 16     |
| 22                                                   | 167   | 167 | 1      |
| 23                                                   | 175   | 182 | 8      |
| 24                                                   | 184   | 184 | 1      |
| 25                                                   | 189   | 189 | 1      |
| 26                                                   | 212   | 212 | 1      |
| 27                                                   | 214   | 224 | 11     |
| 28                                                   | 234   | 234 | 1      |
| 29                                                   | 240   | 240 | 1      |
| 30                                                   | 251   | 253 | 3      |
| 31                                                   | 255   | 265 | 11     |
| 32                                                   | 288   | 289 | 2      |
| 33                                                   | 306   | 306 | 1      |
| 34                                                   | 310   | 311 | 2      |
| 35                                                   | 313   | 314 | 2      |
| 36                                                   | 318   | 331 | 14     |
| 37                                                   | 333   | 333 | 1      |
| 38                                                   | 352   | 352 | 1      |
| 39                                                   | 356   | 356 | 1      |
| 40                                                   | 358   | 364 | 7      |
| 41                                                   | 366   | 370 | 5      |
| 42                                                   | 377   | 381 | 5      |
| 43                                                   | 383   | 383 | 1      |
| 44                                                   | 385   | 388 | 4      |

Supplementary Text 2

|    |     |     |    |
|----|-----|-----|----|
| 45 | 392 | 392 | 1  |
| 46 | 394 | 394 | 1  |
| 47 | 408 | 409 | 2  |
| 48 | 412 | 412 | 1  |
| 49 | 414 | 421 | 8  |
| 50 | 426 | 426 | 1  |
| 51 | 428 | 428 | 1  |
| 52 | 437 | 450 | 14 |
| 53 | 457 | 457 | 1  |
| 54 | 501 | 504 | 4  |

# 242 positions (cumulative volume <= 75 Angstrom^3)

|    | start | end | length |
|----|-------|-----|--------|
| 1  | 1     | 22  | 22     |
| 2  | 28    | 28  | 1      |
| 3  | 31    | 31  | 1      |
| 4  | 33    | 38  | 6      |
| 5  | 42    | 51  | 10     |
| 6  | 54    | 74  | 21     |
| 7  | 77    | 78  | 2      |
| 8  | 81    | 81  | 1      |
| 9  | 84    | 84  | 1      |
| 10 | 86    | 86  | 1      |
| 11 | 88    | 110 | 23     |
| 12 | 112   | 113 | 2      |
| 13 | 115   | 115 | 1      |
| 14 | 117   | 117 | 1      |
| 15 | 121   | 124 | 4      |
| 16 | 126   | 127 | 2      |
| 17 | 130   | 130 | 1      |
| 18 | 135   | 136 | 2      |
| 19 | 138   | 140 | 3      |
| 20 | 148   | 148 | 1      |
| 21 | 150   | 165 | 16     |
| 22 | 167   | 167 | 1      |
| 23 | 175   | 182 | 8      |
| 24 | 184   | 184 | 1      |
| 25 | 189   | 189 | 1      |
| 26 | 212   | 212 | 1      |
| 27 | 214   | 224 | 11     |
| 28 | 234   | 234 | 1      |
| 29 | 240   | 240 | 1      |
| 30 | 251   | 253 | 3      |
| 31 | 255   | 265 | 11     |
| 32 | 288   | 289 | 2      |
| 33 | 306   | 306 | 1      |
| 34 | 310   | 311 | 2      |
| 35 | 313   | 314 | 2      |
| 36 | 318   | 331 | 14     |
| 37 | 333   | 333 | 1      |
| 38 | 352   | 352 | 1      |

Supplementary Text 2

|    |     |     |    |
|----|-----|-----|----|
| 39 | 356 | 356 | 1  |
| 40 | 358 | 370 | 13 |
| 41 | 377 | 381 | 5  |
| 42 | 383 | 383 | 1  |
| 43 | 385 | 388 | 4  |
| 44 | 392 | 392 | 1  |
| 45 | 394 | 394 | 1  |
| 46 | 408 | 409 | 2  |
| 47 | 412 | 412 | 1  |
| 48 | 414 | 421 | 8  |
| 49 | 426 | 426 | 1  |
| 50 | 428 | 428 | 1  |
| 51 | 437 | 450 | 14 |
| 52 | 457 | 457 | 1  |
| 53 | 501 | 504 | 4  |

# 243 positions (cumulative volume <= 76 Angstrom^3)

|    | start | end | length |
|----|-------|-----|--------|
| 1  | 1     | 22  | 22     |
| 2  | 28    | 28  | 1      |
| 3  | 31    | 31  | 1      |
| 4  | 33    | 38  | 6      |
| 5  | 42    | 51  | 10     |
| 6  | 54    | 74  | 21     |
| 7  | 77    | 78  | 2      |
| 8  | 81    | 81  | 1      |
| 9  | 84    | 84  | 1      |
| 10 | 86    | 86  | 1      |
| 11 | 88    | 110 | 23     |
| 12 | 112   | 113 | 2      |
| 13 | 115   | 115 | 1      |
| 14 | 117   | 117 | 1      |
| 15 | 121   | 124 | 4      |
| 16 | 126   | 127 | 2      |
| 17 | 130   | 130 | 1      |
| 18 | 135   | 136 | 2      |
| 19 | 138   | 140 | 3      |
| 20 | 148   | 148 | 1      |
| 21 | 150   | 165 | 16     |
| 22 | 167   | 167 | 1      |
| 23 | 175   | 182 | 8      |
| 24 | 184   | 184 | 1      |
| 25 | 189   | 189 | 1      |
| 26 | 212   | 224 | 13     |
| 27 | 234   | 234 | 1      |
| 28 | 240   | 240 | 1      |
| 29 | 251   | 253 | 3      |
| 30 | 255   | 265 | 11     |
| 31 | 288   | 289 | 2      |
| 32 | 306   | 306 | 1      |
| 33 | 310   | 311 | 2      |

Supplementary Text 2

|    |     |     |    |
|----|-----|-----|----|
| 34 | 313 | 314 | 2  |
| 35 | 318 | 331 | 14 |
| 36 | 333 | 333 | 1  |
| 37 | 352 | 352 | 1  |
| 38 | 356 | 356 | 1  |
| 39 | 358 | 370 | 13 |
| 40 | 377 | 381 | 5  |
| 41 | 383 | 383 | 1  |
| 42 | 385 | 388 | 4  |
| 43 | 392 | 392 | 1  |
| 44 | 394 | 394 | 1  |
| 45 | 408 | 409 | 2  |
| 46 | 412 | 412 | 1  |
| 47 | 414 | 421 | 8  |
| 48 | 426 | 426 | 1  |
| 49 | 428 | 428 | 1  |
| 50 | 437 | 450 | 14 |
| 51 | 457 | 457 | 1  |
| 52 | 501 | 504 | 4  |

# 244 positions (cumulative volume <= 77 Angstrom^3)

|    | start | end | length |
|----|-------|-----|--------|
| 1  | 1     | 22  | 22     |
| 2  | 28    | 28  | 1      |
| 3  | 31    | 31  | 1      |
| 4  | 33    | 38  | 6      |
| 5  | 42    | 51  | 10     |
| 6  | 54    | 74  | 21     |
| 7  | 77    | 78  | 2      |
| 8  | 81    | 81  | 1      |
| 9  | 84    | 84  | 1      |
| 10 | 86    | 86  | 1      |
| 11 | 88    | 110 | 23     |
| 12 | 112   | 113 | 2      |
| 13 | 115   | 115 | 1      |
| 14 | 117   | 117 | 1      |
| 15 | 121   | 124 | 4      |
| 16 | 126   | 127 | 2      |
| 17 | 130   | 130 | 1      |
| 18 | 135   | 136 | 2      |
| 19 | 138   | 140 | 3      |
| 20 | 148   | 148 | 1      |
| 21 | 150   | 165 | 16     |
| 22 | 167   | 167 | 1      |
| 23 | 175   | 184 | 10     |
| 24 | 189   | 189 | 1      |
| 25 | 212   | 224 | 13     |
| 26 | 234   | 234 | 1      |
| 27 | 240   | 240 | 1      |
| 28 | 251   | 253 | 3      |
| 29 | 255   | 265 | 11     |

Supplementary Text 2

|    |     |     |    |
|----|-----|-----|----|
| 30 | 288 | 289 | 2  |
| 31 | 306 | 306 | 1  |
| 32 | 310 | 311 | 2  |
| 33 | 313 | 314 | 2  |
| 34 | 318 | 331 | 14 |
| 35 | 333 | 333 | 1  |
| 36 | 352 | 352 | 1  |
| 37 | 356 | 356 | 1  |
| 38 | 358 | 370 | 13 |
| 39 | 377 | 381 | 5  |
| 40 | 383 | 383 | 1  |
| 41 | 385 | 388 | 4  |
| 42 | 392 | 392 | 1  |
| 43 | 394 | 394 | 1  |
| 44 | 408 | 409 | 2  |
| 45 | 412 | 412 | 1  |
| 46 | 414 | 421 | 8  |
| 47 | 426 | 426 | 1  |
| 48 | 428 | 428 | 1  |
| 49 | 437 | 450 | 14 |
| 50 | 457 | 457 | 1  |
| 51 | 501 | 504 | 4  |

# 244 positions (cumulative volume <= 78 Angstrom^3)

|    | start | end | length |
|----|-------|-----|--------|
| 1  | 1     | 22  | 22     |
| 2  | 28    | 28  | 1      |
| 3  | 31    | 31  | 1      |
| 4  | 33    | 38  | 6      |
| 5  | 42    | 51  | 10     |
| 6  | 54    | 74  | 21     |
| 7  | 77    | 78  | 2      |
| 8  | 81    | 81  | 1      |
| 9  | 84    | 84  | 1      |
| 10 | 86    | 86  | 1      |
| 11 | 88    | 110 | 23     |
| 12 | 112   | 113 | 2      |
| 13 | 115   | 115 | 1      |
| 14 | 117   | 117 | 1      |
| 15 | 121   | 124 | 4      |
| 16 | 126   | 127 | 2      |
| 17 | 130   | 130 | 1      |
| 18 | 135   | 136 | 2      |
| 19 | 138   | 140 | 3      |
| 20 | 148   | 148 | 1      |
| 21 | 150   | 165 | 16     |
| 22 | 167   | 167 | 1      |
| 23 | 175   | 184 | 10     |
| 24 | 189   | 189 | 1      |
| 25 | 212   | 224 | 13     |
| 26 | 234   | 234 | 1      |

Supplementary Text 2

|    |     |     |    |
|----|-----|-----|----|
| 27 | 240 | 240 | 1  |
| 28 | 251 | 253 | 3  |
| 29 | 255 | 265 | 11 |
| 30 | 288 | 289 | 2  |
| 31 | 306 | 306 | 1  |
| 32 | 310 | 311 | 2  |
| 33 | 313 | 314 | 2  |
| 34 | 318 | 331 | 14 |
| 35 | 333 | 333 | 1  |
| 36 | 352 | 352 | 1  |
| 37 | 356 | 356 | 1  |
| 38 | 358 | 370 | 13 |
| 39 | 377 | 381 | 5  |
| 40 | 383 | 383 | 1  |
| 41 | 385 | 388 | 4  |
| 42 | 392 | 392 | 1  |
| 43 | 394 | 394 | 1  |
| 44 | 408 | 409 | 2  |
| 45 | 412 | 412 | 1  |
| 46 | 414 | 421 | 8  |
| 47 | 426 | 426 | 1  |
| 48 | 428 | 428 | 1  |
| 49 | 437 | 450 | 14 |
| 50 | 457 | 457 | 1  |
| 51 | 501 | 504 | 4  |

# 245 positions (cumulative volume <= 79 Angstrom^3)

|    | start | end | length |
|----|-------|-----|--------|
| 1  | 1     | 22  | 22     |
| 2  | 28    | 28  | 1      |
| 3  | 31    | 31  | 1      |
| 4  | 33    | 38  | 6      |
| 5  | 42    | 51  | 10     |
| 6  | 54    | 74  | 21     |
| 7  | 77    | 78  | 2      |
| 8  | 81    | 81  | 1      |
| 9  | 84    | 84  | 1      |
| 10 | 86    | 110 | 25     |
| 11 | 112   | 113 | 2      |
| 12 | 115   | 115 | 1      |
| 13 | 117   | 117 | 1      |
| 14 | 121   | 124 | 4      |
| 15 | 126   | 127 | 2      |
| 16 | 130   | 130 | 1      |
| 17 | 135   | 136 | 2      |
| 18 | 138   | 140 | 3      |
| 19 | 148   | 148 | 1      |
| 20 | 150   | 165 | 16     |
| 21 | 167   | 167 | 1      |
| 22 | 175   | 184 | 10     |
| 23 | 189   | 189 | 1      |

Supplementary Text 2

|    |     |     |    |
|----|-----|-----|----|
| 24 | 212 | 224 | 13 |
| 25 | 234 | 234 | 1  |
| 26 | 240 | 240 | 1  |
| 27 | 251 | 253 | 3  |
| 28 | 255 | 265 | 11 |
| 29 | 288 | 289 | 2  |
| 30 | 306 | 306 | 1  |
| 31 | 310 | 311 | 2  |
| 32 | 313 | 314 | 2  |
| 33 | 318 | 331 | 14 |
| 34 | 333 | 333 | 1  |
| 35 | 352 | 352 | 1  |
| 36 | 356 | 356 | 1  |
| 37 | 358 | 370 | 13 |
| 38 | 377 | 381 | 5  |
| 39 | 383 | 383 | 1  |
| 40 | 385 | 388 | 4  |
| 41 | 392 | 392 | 1  |
| 42 | 394 | 394 | 1  |
| 43 | 408 | 409 | 2  |
| 44 | 412 | 412 | 1  |
| 45 | 414 | 421 | 8  |
| 46 | 426 | 426 | 1  |
| 47 | 428 | 428 | 1  |
| 48 | 437 | 450 | 14 |
| 49 | 457 | 457 | 1  |
| 50 | 501 | 504 | 4  |

# 247 positions (cumulative volume <= 80 Angstrom^3)

|    | start | end | length |
|----|-------|-----|--------|
| 1  | 1     | 22  | 22     |
| 2  | 28    | 28  | 1      |
| 3  | 31    | 31  | 1      |
| 4  | 33    | 38  | 6      |
| 5  | 42    | 51  | 10     |
| 6  | 54    | 74  | 21     |
| 7  | 77    | 78  | 2      |
| 8  | 81    | 81  | 1      |
| 9  | 84    | 84  | 1      |
| 10 | 86    | 110 | 25     |
| 11 | 112   | 113 | 2      |
| 12 | 115   | 117 | 3      |
| 13 | 121   | 124 | 4      |
| 14 | 126   | 127 | 2      |
| 15 | 130   | 130 | 1      |
| 16 | 135   | 136 | 2      |
| 17 | 138   | 140 | 3      |
| 18 | 148   | 148 | 1      |
| 19 | 150   | 165 | 16     |
| 20 | 167   | 167 | 1      |
| 21 | 175   | 184 | 10     |

Supplementary Text 2

|    |     |     |    |
|----|-----|-----|----|
| 22 | 189 | 189 | 1  |
| 23 | 212 | 224 | 13 |
| 24 | 234 | 234 | 1  |
| 25 | 240 | 240 | 1  |
| 26 | 251 | 253 | 3  |
| 27 | 255 | 265 | 11 |
| 28 | 288 | 289 | 2  |
| 29 | 306 | 306 | 1  |
| 30 | 310 | 311 | 2  |
| 31 | 313 | 314 | 2  |
| 32 | 318 | 331 | 14 |
| 33 | 333 | 333 | 1  |
| 34 | 352 | 352 | 1  |
| 35 | 356 | 356 | 1  |
| 36 | 358 | 370 | 13 |
| 37 | 377 | 381 | 5  |
| 38 | 383 | 383 | 1  |
| 39 | 385 | 388 | 4  |
| 40 | 391 | 392 | 2  |
| 41 | 394 | 394 | 1  |
| 42 | 408 | 409 | 2  |
| 43 | 412 | 412 | 1  |
| 44 | 414 | 421 | 8  |
| 45 | 426 | 426 | 1  |
| 46 | 428 | 428 | 1  |
| 47 | 437 | 450 | 14 |
| 48 | 457 | 457 | 1  |
| 49 | 501 | 504 | 4  |

# 248 positions (cumulative volume <= 81 Angstrom^3)

|    | start | end | length |
|----|-------|-----|--------|
| 1  | 1     | 22  | 22     |
| 2  | 28    | 28  | 1      |
| 3  | 31    | 31  | 1      |
| 4  | 33    | 38  | 6      |
| 5  | 42    | 51  | 10     |
| 6  | 54    | 74  | 21     |
| 7  | 77    | 78  | 2      |
| 8  | 81    | 81  | 1      |
| 9  | 84    | 84  | 1      |
| 10 | 86    | 110 | 25     |
| 11 | 112   | 113 | 2      |
| 12 | 115   | 117 | 3      |
| 13 | 121   | 124 | 4      |
| 14 | 126   | 127 | 2      |
| 15 | 130   | 130 | 1      |
| 16 | 135   | 136 | 2      |
| 17 | 138   | 140 | 3      |
| 18 | 148   | 148 | 1      |
| 19 | 150   | 165 | 16     |
| 20 | 167   | 167 | 1      |



Supplementary Text 2

|    |     |     |    |
|----|-----|-----|----|
| 21 | 175 | 184 | 10 |
| 22 | 189 | 189 | 1  |
| 23 | 212 | 224 | 13 |
| 24 | 234 | 234 | 1  |
| 25 | 240 | 240 | 1  |
| 26 | 251 | 253 | 3  |
| 27 | 255 | 265 | 11 |
| 28 | 288 | 289 | 2  |
| 29 | 306 | 306 | 1  |
| 30 | 310 | 311 | 2  |
| 31 | 313 | 314 | 2  |
| 32 | 318 | 331 | 14 |
| 33 | 333 | 333 | 1  |
| 34 | 352 | 352 | 1  |
| 35 | 356 | 356 | 1  |
| 36 | 358 | 370 | 13 |
| 37 | 377 | 381 | 5  |
| 38 | 383 | 383 | 1  |
| 39 | 385 | 388 | 4  |
| 40 | 391 | 392 | 2  |
| 41 | 394 | 394 | 1  |
| 42 | 408 | 409 | 2  |
| 43 | 412 | 412 | 1  |
| 44 | 414 | 421 | 8  |
| 45 | 426 | 426 | 1  |
| 46 | 428 | 428 | 1  |
| 47 | 437 | 450 | 14 |
| 48 | 457 | 457 | 1  |
| 49 | 500 | 504 | 5  |

# 248 positions (cumulative volume <= 82 Angstrom^3)

|    | start | end | length |
|----|-------|-----|--------|
| 1  | 1     | 22  | 22     |
| 2  | 28    | 28  | 1      |
| 3  | 31    | 31  | 1      |
| 4  | 33    | 38  | 6      |
| 5  | 42    | 51  | 10     |
| 6  | 54    | 74  | 21     |
| 7  | 77    | 78  | 2      |
| 8  | 81    | 81  | 1      |
| 9  | 84    | 84  | 1      |
| 10 | 86    | 110 | 25     |
| 11 | 112   | 113 | 2      |
| 12 | 115   | 117 | 3      |
| 13 | 121   | 124 | 4      |
| 14 | 126   | 127 | 2      |
| 15 | 130   | 130 | 1      |
| 16 | 135   | 136 | 2      |
| 17 | 138   | 140 | 3      |
| 18 | 148   | 148 | 1      |
| 19 | 150   | 165 | 16     |

Supplementary Text 2

|    |     |     |    |
|----|-----|-----|----|
| 20 | 167 | 167 | 1  |
| 21 | 175 | 184 | 10 |
| 22 | 189 | 189 | 1  |
| 23 | 212 | 224 | 13 |
| 24 | 234 | 234 | 1  |
| 25 | 240 | 240 | 1  |
| 26 | 251 | 253 | 3  |
| 27 | 255 | 265 | 11 |
| 28 | 288 | 289 | 2  |
| 29 | 306 | 306 | 1  |
| 30 | 310 | 311 | 2  |
| 31 | 313 | 314 | 2  |
| 32 | 318 | 331 | 14 |
| 33 | 333 | 333 | 1  |
| 34 | 352 | 352 | 1  |
| 35 | 356 | 356 | 1  |
| 36 | 358 | 370 | 13 |
| 37 | 377 | 381 | 5  |
| 38 | 383 | 383 | 1  |
| 39 | 385 | 388 | 4  |
| 40 | 391 | 392 | 2  |
| 41 | 394 | 394 | 1  |
| 42 | 408 | 409 | 2  |
| 43 | 412 | 412 | 1  |
| 44 | 414 | 421 | 8  |
| 45 | 426 | 426 | 1  |
| 46 | 428 | 428 | 1  |
| 47 | 437 | 450 | 14 |
| 48 | 457 | 457 | 1  |
| 49 | 500 | 504 | 5  |

# 249 positions (cumulative volume <= 83 Angstrom^3)

|    | start | end | length |
|----|-------|-----|--------|
| 1  | 1     | 22  | 22     |
| 2  | 28    | 28  | 1      |
| 3  | 31    | 31  | 1      |
| 4  | 33    | 38  | 6      |
| 5  | 42    | 51  | 10     |
| 6  | 54    | 74  | 21     |
| 7  | 77    | 78  | 2      |
| 8  | 81    | 81  | 1      |
| 9  | 84    | 84  | 1      |
| 10 | 86    | 110 | 25     |
| 11 | 112   | 113 | 2      |
| 12 | 115   | 117 | 3      |
| 13 | 121   | 124 | 4      |
| 14 | 126   | 127 | 2      |
| 15 | 130   | 130 | 1      |
| 16 | 135   | 136 | 2      |
| 17 | 138   | 140 | 3      |
| 18 | 148   | 148 | 1      |

Supplementary Text 2

|    |     |     |    |
|----|-----|-----|----|
| 19 | 150 | 165 | 16 |
| 20 | 167 | 167 | 1  |
| 21 | 175 | 184 | 10 |
| 22 | 189 | 189 | 1  |
| 23 | 212 | 224 | 13 |
| 24 | 234 | 234 | 1  |
| 25 | 240 | 240 | 1  |
| 26 | 251 | 253 | 3  |
| 27 | 255 | 265 | 11 |
| 28 | 288 | 289 | 2  |
| 29 | 306 | 306 | 1  |
| 30 | 310 | 314 | 5  |
| 31 | 318 | 331 | 14 |
| 32 | 333 | 333 | 1  |
| 33 | 352 | 352 | 1  |
| 34 | 356 | 356 | 1  |
| 35 | 358 | 370 | 13 |
| 36 | 377 | 381 | 5  |
| 37 | 383 | 383 | 1  |
| 38 | 385 | 388 | 4  |
| 39 | 391 | 392 | 2  |
| 40 | 394 | 394 | 1  |
| 41 | 408 | 409 | 2  |
| 42 | 412 | 412 | 1  |
| 43 | 414 | 421 | 8  |
| 44 | 426 | 426 | 1  |
| 45 | 428 | 428 | 1  |
| 46 | 437 | 450 | 14 |
| 47 | 457 | 457 | 1  |
| 48 | 500 | 504 | 5  |

# 250 positions (cumulative volume <= 84 Angstrom^3)

|    | start | end | length |
|----|-------|-----|--------|
| 1  | 1     | 22  | 22     |
| 2  | 28    | 28  | 1      |
| 3  | 31    | 31  | 1      |
| 4  | 33    | 38  | 6      |
| 5  | 42    | 51  | 10     |
| 6  | 54    | 74  | 21     |
| 7  | 77    | 78  | 2      |
| 8  | 81    | 81  | 1      |
| 9  | 84    | 84  | 1      |
| 10 | 86    | 110 | 25     |
| 11 | 112   | 113 | 2      |
| 12 | 115   | 117 | 3      |
| 13 | 121   | 124 | 4      |
| 14 | 126   | 127 | 2      |
| 15 | 130   | 130 | 1      |
| 16 | 135   | 136 | 2      |
| 17 | 138   | 140 | 3      |
| 18 | 148   | 148 | 1      |

Supplementary Text 2

|    |     |     |    |
|----|-----|-----|----|
| 19 | 150 | 165 | 16 |
| 20 | 167 | 167 | 1  |
| 21 | 175 | 184 | 10 |
| 22 | 189 | 189 | 1  |
| 23 | 212 | 224 | 13 |
| 24 | 234 | 234 | 1  |
| 25 | 240 | 240 | 1  |
| 26 | 251 | 253 | 3  |
| 27 | 255 | 265 | 11 |
| 28 | 288 | 289 | 2  |
| 29 | 306 | 306 | 1  |
| 30 | 310 | 314 | 5  |
| 31 | 318 | 331 | 14 |
| 32 | 333 | 333 | 1  |
| 33 | 352 | 352 | 1  |
| 34 | 356 | 356 | 1  |
| 35 | 358 | 370 | 13 |
| 36 | 377 | 381 | 5  |
| 37 | 383 | 383 | 1  |
| 38 | 385 | 388 | 4  |
| 39 | 391 | 392 | 2  |
| 40 | 394 | 394 | 1  |
| 41 | 408 | 409 | 2  |
| 42 | 412 | 412 | 1  |
| 43 | 414 | 421 | 8  |
| 44 | 426 | 426 | 1  |
| 45 | 428 | 428 | 1  |
| 46 | 431 | 431 | 1  |
| 47 | 437 | 450 | 14 |
| 48 | 457 | 457 | 1  |
| 49 | 500 | 504 | 5  |

# 251 positions (cumulative volume <= 85 Angstrom^3)

|    | start | end | length |
|----|-------|-----|--------|
| 1  | 1     | 22  | 22     |
| 2  | 28    | 28  | 1      |
| 3  | 31    | 31  | 1      |
| 4  | 33    | 38  | 6      |
| 5  | 42    | 51  | 10     |
| 6  | 54    | 74  | 21     |
| 7  | 77    | 78  | 2      |
| 8  | 81    | 81  | 1      |
| 9  | 84    | 84  | 1      |
| 10 | 86    | 110 | 25     |
| 11 | 112   | 113 | 2      |
| 12 | 115   | 117 | 3      |
| 13 | 121   | 124 | 4      |
| 14 | 126   | 127 | 2      |
| 15 | 130   | 130 | 1      |
| 16 | 135   | 136 | 2      |
| 17 | 138   | 140 | 3      |

Supplementary Text 2

|    |     |     |    |
|----|-----|-----|----|
| 18 | 148 | 148 | 1  |
| 19 | 150 | 165 | 16 |
| 20 | 167 | 167 | 1  |
| 21 | 175 | 184 | 10 |
| 22 | 189 | 189 | 1  |
| 23 | 212 | 224 | 13 |
| 24 | 234 | 234 | 1  |
| 25 | 240 | 240 | 1  |
| 26 | 251 | 253 | 3  |
| 27 | 255 | 265 | 11 |
| 28 | 288 | 289 | 2  |
| 29 | 306 | 306 | 1  |
| 30 | 310 | 314 | 5  |
| 31 | 316 | 316 | 1  |
| 32 | 318 | 331 | 14 |
| 33 | 333 | 333 | 1  |
| 34 | 352 | 352 | 1  |
| 35 | 356 | 356 | 1  |
| 36 | 358 | 370 | 13 |
| 37 | 377 | 381 | 5  |
| 38 | 383 | 383 | 1  |
| 39 | 385 | 388 | 4  |
| 40 | 391 | 392 | 2  |
| 41 | 394 | 394 | 1  |
| 42 | 408 | 409 | 2  |
| 43 | 412 | 412 | 1  |
| 44 | 414 | 421 | 8  |
| 45 | 426 | 426 | 1  |
| 46 | 428 | 428 | 1  |
| 47 | 431 | 431 | 1  |
| 48 | 437 | 450 | 14 |
| 49 | 457 | 457 | 1  |
| 50 | 500 | 504 | 5  |

# 252 positions (cumulative volume <= 86 Angstrom^3)

|    | start | end | length |
|----|-------|-----|--------|
| 1  | 1     | 22  | 22     |
| 2  | 28    | 28  | 1      |
| 3  | 31    | 31  | 1      |
| 4  | 33    | 38  | 6      |
| 5  | 42    | 51  | 10     |
| 6  | 54    | 74  | 21     |
| 7  | 77    | 78  | 2      |
| 8  | 81    | 81  | 1      |
| 9  | 84    | 84  | 1      |
| 10 | 86    | 110 | 25     |
| 11 | 112   | 113 | 2      |
| 12 | 115   | 117 | 3      |
| 13 | 121   | 124 | 4      |
| 14 | 126   | 127 | 2      |
| 15 | 130   | 130 | 1      |

Supplementary Text 2

|    |     |     |    |
|----|-----|-----|----|
| 16 | 135 | 136 | 2  |
| 17 | 138 | 140 | 3  |
| 18 | 148 | 148 | 1  |
| 19 | 150 | 165 | 16 |
| 20 | 167 | 167 | 1  |
| 21 | 175 | 184 | 10 |
| 22 | 189 | 189 | 1  |
| 23 | 212 | 224 | 13 |
| 24 | 234 | 234 | 1  |
| 25 | 240 | 240 | 1  |
| 26 | 251 | 253 | 3  |
| 27 | 255 | 265 | 11 |
| 28 | 288 | 289 | 2  |
| 29 | 306 | 306 | 1  |
| 30 | 310 | 314 | 5  |
| 31 | 316 | 331 | 16 |
| 32 | 333 | 333 | 1  |
| 33 | 352 | 352 | 1  |
| 34 | 356 | 356 | 1  |
| 35 | 358 | 370 | 13 |
| 36 | 377 | 381 | 5  |
| 37 | 383 | 383 | 1  |
| 38 | 385 | 388 | 4  |
| 39 | 391 | 392 | 2  |
| 40 | 394 | 394 | 1  |
| 41 | 408 | 409 | 2  |
| 42 | 412 | 412 | 1  |
| 43 | 414 | 421 | 8  |
| 44 | 426 | 426 | 1  |
| 45 | 428 | 428 | 1  |
| 46 | 431 | 431 | 1  |
| 47 | 437 | 450 | 14 |
| 48 | 457 | 457 | 1  |
| 49 | 500 | 504 | 5  |

# 253 positions (cumulative volume <= 87 Angstrom^3)

|    | start | end | length |
|----|-------|-----|--------|
| 1  | 1     | 22  | 22     |
| 2  | 28    | 28  | 1      |
| 3  | 31    | 31  | 1      |
| 4  | 33    | 38  | 6      |
| 5  | 42    | 51  | 10     |
| 6  | 54    | 74  | 21     |
| 7  | 77    | 78  | 2      |
| 8  | 81    | 81  | 1      |
| 9  | 84    | 84  | 1      |
| 10 | 86    | 110 | 25     |
| 11 | 112   | 113 | 2      |
| 12 | 115   | 117 | 3      |
| 13 | 121   | 124 | 4      |
| 14 | 126   | 127 | 2      |

Supplementary Text 2

|    |     |     |    |
|----|-----|-----|----|
| 15 | 130 | 130 | 1  |
| 16 | 135 | 136 | 2  |
| 17 | 138 | 140 | 3  |
| 18 | 148 | 148 | 1  |
| 19 | 150 | 165 | 16 |
| 20 | 167 | 167 | 1  |
| 21 | 175 | 184 | 10 |
| 22 | 189 | 189 | 1  |
| 23 | 212 | 224 | 13 |
| 24 | 234 | 234 | 1  |
| 25 | 240 | 240 | 1  |
| 26 | 251 | 253 | 3  |
| 27 | 255 | 265 | 11 |
| 28 | 288 | 289 | 2  |
| 29 | 306 | 306 | 1  |
| 30 | 310 | 314 | 5  |
| 31 | 316 | 331 | 16 |
| 32 | 333 | 333 | 1  |
| 33 | 352 | 352 | 1  |
| 34 | 356 | 356 | 1  |
| 35 | 358 | 370 | 13 |
| 36 | 377 | 381 | 5  |
| 37 | 383 | 383 | 1  |
| 38 | 385 | 388 | 4  |
| 39 | 391 | 392 | 2  |
| 40 | 394 | 394 | 1  |
| 41 | 408 | 409 | 2  |
| 42 | 412 | 412 | 1  |
| 43 | 414 | 421 | 8  |
| 44 | 426 | 426 | 1  |
| 45 | 428 | 428 | 1  |
| 46 | 431 | 431 | 1  |
| 47 | 437 | 450 | 14 |
| 48 | 453 | 453 | 1  |
| 49 | 457 | 457 | 1  |
| 50 | 500 | 504 | 5  |

# 254 positions (cumulative volume <= 88 Angstrom^3)

|    | start | end | length |
|----|-------|-----|--------|
| 1  | 1     | 22  | 22     |
| 2  | 28    | 28  | 1      |
| 3  | 31    | 31  | 1      |
| 4  | 33    | 38  | 6      |
| 5  | 42    | 51  | 10     |
| 6  | 54    | 74  | 21     |
| 7  | 77    | 78  | 2      |
| 8  | 81    | 81  | 1      |
| 9  | 84    | 84  | 1      |
| 10 | 86    | 110 | 25     |
| 11 | 112   | 113 | 2      |
| 12 | 115   | 117 | 3      |

Supplementary Text 2

|    |     |     |    |
|----|-----|-----|----|
| 13 | 121 | 124 | 4  |
| 14 | 126 | 127 | 2  |
| 15 | 130 | 130 | 1  |
| 16 | 135 | 136 | 2  |
| 17 | 138 | 140 | 3  |
| 18 | 148 | 148 | 1  |
| 19 | 150 | 165 | 16 |
| 20 | 167 | 167 | 1  |
| 21 | 175 | 184 | 10 |
| 22 | 189 | 189 | 1  |
| 23 | 212 | 224 | 13 |
| 24 | 234 | 234 | 1  |
| 25 | 240 | 240 | 1  |
| 26 | 251 | 253 | 3  |
| 27 | 255 | 265 | 11 |
| 28 | 288 | 289 | 2  |
| 29 | 306 | 306 | 1  |
| 30 | 310 | 314 | 5  |
| 31 | 316 | 331 | 16 |
| 32 | 333 | 333 | 1  |
| 33 | 352 | 352 | 1  |
| 34 | 356 | 356 | 1  |
| 35 | 358 | 370 | 13 |
| 36 | 377 | 381 | 5  |
| 37 | 383 | 383 | 1  |
| 38 | 385 | 389 | 5  |
| 39 | 391 | 392 | 2  |
| 40 | 394 | 394 | 1  |
| 41 | 408 | 409 | 2  |
| 42 | 412 | 412 | 1  |
| 43 | 414 | 421 | 8  |
| 44 | 426 | 426 | 1  |
| 45 | 428 | 428 | 1  |
| 46 | 431 | 431 | 1  |
| 47 | 437 | 450 | 14 |
| 48 | 453 | 453 | 1  |
| 49 | 457 | 457 | 1  |
| 50 | 500 | 504 | 5  |

# 255 positions (cumulative volume <= 89 Angstrom^3)

|    | start | end | length |
|----|-------|-----|--------|
| 1  | 1     | 22  | 22     |
| 2  | 28    | 28  | 1      |
| 3  | 31    | 31  | 1      |
| 4  | 33    | 38  | 6      |
| 5  | 42    | 51  | 10     |
| 6  | 54    | 74  | 21     |
| 7  | 77    | 78  | 2      |
| 8  | 81    | 81  | 1      |
| 9  | 84    | 84  | 1      |
| 10 | 86    | 110 | 25     |



Supplementary Text 2

|    |     |     |    |
|----|-----|-----|----|
| 11 | 112 | 113 | 2  |
| 12 | 115 | 117 | 3  |
| 13 | 121 | 124 | 4  |
| 14 | 126 | 127 | 2  |
| 15 | 130 | 130 | 1  |
| 16 | 135 | 136 | 2  |
| 17 | 138 | 140 | 3  |
| 18 | 148 | 148 | 1  |
| 19 | 150 | 165 | 16 |
| 20 | 167 | 167 | 1  |
| 21 | 175 | 184 | 10 |
| 22 | 189 | 189 | 1  |
| 23 | 212 | 224 | 13 |
| 24 | 234 | 234 | 1  |
| 25 | 240 | 240 | 1  |
| 26 | 251 | 253 | 3  |
| 27 | 255 | 265 | 11 |
| 28 | 288 | 289 | 2  |
| 29 | 306 | 306 | 1  |
| 30 | 310 | 314 | 5  |
| 31 | 316 | 331 | 16 |
| 32 | 333 | 333 | 1  |
| 33 | 352 | 352 | 1  |
| 34 | 356 | 356 | 1  |
| 35 | 358 | 370 | 13 |
| 36 | 377 | 381 | 5  |
| 37 | 383 | 383 | 1  |
| 38 | 385 | 389 | 5  |
| 39 | 391 | 392 | 2  |
| 40 | 394 | 394 | 1  |
| 41 | 408 | 409 | 2  |
| 42 | 412 | 421 | 10 |
| 43 | 426 | 426 | 1  |
| 44 | 428 | 428 | 1  |
| 45 | 431 | 431 | 1  |
| 46 | 437 | 450 | 14 |
| 47 | 453 | 453 | 1  |
| 48 | 457 | 457 | 1  |
| 49 | 500 | 504 | 5  |

# 255 positions (cumulative volume <= 90 Angstrom^3)

|   | start | end | length |
|---|-------|-----|--------|
| 1 | 1     | 22  | 22     |
| 2 | 28    | 28  | 1      |
| 3 | 31    | 31  | 1      |
| 4 | 33    | 38  | 6      |
| 5 | 42    | 51  | 10     |
| 6 | 54    | 74  | 21     |
| 7 | 77    | 78  | 2      |
| 8 | 81    | 81  | 1      |
| 9 | 84    | 84  | 1      |

Supplementary Text 2

|    |     |     |    |
|----|-----|-----|----|
| 10 | 86  | 110 | 25 |
| 11 | 112 | 113 | 2  |
| 12 | 115 | 117 | 3  |
| 13 | 121 | 124 | 4  |
| 14 | 126 | 127 | 2  |
| 15 | 130 | 130 | 1  |
| 16 | 135 | 136 | 2  |
| 17 | 138 | 140 | 3  |
| 18 | 148 | 148 | 1  |
| 19 | 150 | 165 | 16 |
| 20 | 167 | 167 | 1  |
| 21 | 175 | 184 | 10 |
| 22 | 189 | 189 | 1  |
| 23 | 212 | 224 | 13 |
| 24 | 234 | 234 | 1  |
| 25 | 240 | 240 | 1  |
| 26 | 251 | 253 | 3  |
| 27 | 255 | 265 | 11 |
| 28 | 288 | 289 | 2  |
| 29 | 306 | 306 | 1  |
| 30 | 310 | 314 | 5  |
| 31 | 316 | 331 | 16 |
| 32 | 333 | 333 | 1  |
| 33 | 352 | 352 | 1  |
| 34 | 356 | 356 | 1  |
| 35 | 358 | 370 | 13 |
| 36 | 377 | 381 | 5  |
| 37 | 383 | 383 | 1  |
| 38 | 385 | 389 | 5  |
| 39 | 391 | 392 | 2  |
| 40 | 394 | 394 | 1  |
| 41 | 408 | 409 | 2  |
| 42 | 412 | 421 | 10 |
| 43 | 426 | 426 | 1  |
| 44 | 428 | 428 | 1  |
| 45 | 431 | 431 | 1  |
| 46 | 437 | 450 | 14 |
| 47 | 453 | 453 | 1  |
| 48 | 457 | 457 | 1  |
| 49 | 500 | 504 | 5  |

# 256 positions (cumulative volume <= 91 Angstrom^3)

|   | start | end | length |
|---|-------|-----|--------|
| 1 | 1     | 22  | 22     |
| 2 | 28    | 28  | 1      |
| 3 | 31    | 31  | 1      |
| 4 | 33    | 38  | 6      |
| 5 | 42    | 51  | 10     |
| 6 | 54    | 74  | 21     |
| 7 | 77    | 78  | 2      |
| 8 | 81    | 81  | 1      |

Supplementary Text 2

|    |     |     |    |
|----|-----|-----|----|
| 9  | 84  | 84  | 1  |
| 10 | 86  | 110 | 25 |
| 11 | 112 | 113 | 2  |
| 12 | 115 | 117 | 3  |
| 13 | 121 | 124 | 4  |
| 14 | 126 | 127 | 2  |
| 15 | 130 | 130 | 1  |
| 16 | 135 | 136 | 2  |
| 17 | 138 | 140 | 3  |
| 18 | 148 | 148 | 1  |
| 19 | 150 | 165 | 16 |
| 20 | 167 | 167 | 1  |
| 21 | 175 | 184 | 10 |
| 22 | 189 | 189 | 1  |
| 23 | 212 | 224 | 13 |
| 24 | 234 | 234 | 1  |
| 25 | 240 | 240 | 1  |
| 26 | 251 | 253 | 3  |
| 27 | 255 | 265 | 11 |
| 28 | 288 | 289 | 2  |
| 29 | 306 | 306 | 1  |
| 30 | 310 | 314 | 5  |
| 31 | 316 | 331 | 16 |
| 32 | 333 | 333 | 1  |
| 33 | 352 | 352 | 1  |
| 34 | 356 | 356 | 1  |
| 35 | 358 | 370 | 13 |
| 36 | 377 | 381 | 5  |
| 37 | 383 | 383 | 1  |
| 38 | 385 | 389 | 5  |
| 39 | 391 | 392 | 2  |
| 40 | 394 | 394 | 1  |
| 41 | 408 | 409 | 2  |
| 42 | 412 | 421 | 10 |
| 43 | 426 | 426 | 1  |
| 44 | 428 | 428 | 1  |
| 45 | 431 | 431 | 1  |
| 46 | 437 | 451 | 15 |
| 47 | 453 | 453 | 1  |
| 48 | 457 | 457 | 1  |
| 49 | 500 | 504 | 5  |

# 257 positions (cumulative volume <= 92 Angstrom^3)

|   | start | end | length |
|---|-------|-----|--------|
| 1 | 1     | 22  | 22     |
| 2 | 28    | 28  | 1      |
| 3 | 31    | 31  | 1      |
| 4 | 33    | 38  | 6      |
| 5 | 42    | 51  | 10     |
| 6 | 54    | 74  | 21     |
| 7 | 77    | 78  | 2      |

Supplementary Text 2

|    |     |     |    |
|----|-----|-----|----|
| 8  | 81  | 81  | 1  |
| 9  | 84  | 84  | 1  |
| 10 | 86  | 113 | 28 |
| 11 | 115 | 117 | 3  |
| 12 | 121 | 124 | 4  |
| 13 | 126 | 127 | 2  |
| 14 | 130 | 130 | 1  |
| 15 | 135 | 136 | 2  |
| 16 | 138 | 140 | 3  |
| 17 | 148 | 148 | 1  |
| 18 | 150 | 165 | 16 |
| 19 | 167 | 167 | 1  |
| 20 | 175 | 184 | 10 |
| 21 | 189 | 189 | 1  |
| 22 | 212 | 224 | 13 |
| 23 | 234 | 234 | 1  |
| 24 | 240 | 240 | 1  |
| 25 | 251 | 253 | 3  |
| 26 | 255 | 265 | 11 |
| 27 | 288 | 289 | 2  |
| 28 | 306 | 306 | 1  |
| 29 | 310 | 314 | 5  |
| 30 | 316 | 331 | 16 |
| 31 | 333 | 333 | 1  |
| 32 | 352 | 352 | 1  |
| 33 | 356 | 356 | 1  |
| 34 | 358 | 370 | 13 |
| 35 | 377 | 381 | 5  |
| 36 | 383 | 383 | 1  |
| 37 | 385 | 389 | 5  |
| 38 | 391 | 392 | 2  |
| 39 | 394 | 394 | 1  |
| 40 | 408 | 409 | 2  |
| 41 | 412 | 421 | 10 |
| 42 | 426 | 426 | 1  |
| 43 | 428 | 428 | 1  |
| 44 | 431 | 431 | 1  |
| 45 | 437 | 451 | 15 |
| 46 | 453 | 453 | 1  |
| 47 | 457 | 457 | 1  |
| 48 | 500 | 504 | 5  |

# 258 positions (cumulative volume <= 93 Angstrom^3)

|   | start | end | length |
|---|-------|-----|--------|
| 1 | 1     | 22  | 22     |
| 2 | 28    | 28  | 1      |
| 3 | 31    | 31  | 1      |
| 4 | 33    | 38  | 6      |
| 5 | 42    | 51  | 10     |
| 6 | 54    | 74  | 21     |
| 7 | 77    | 78  | 2      |

Supplementary Text 2

|    |     |     |    |
|----|-----|-----|----|
| 8  | 81  | 81  | 1  |
| 9  | 84  | 84  | 1  |
| 10 | 86  | 113 | 28 |
| 11 | 115 | 117 | 3  |
| 12 | 121 | 124 | 4  |
| 13 | 126 | 127 | 2  |
| 14 | 130 | 130 | 1  |
| 15 | 133 | 133 | 1  |
| 16 | 135 | 136 | 2  |
| 17 | 138 | 140 | 3  |
| 18 | 148 | 148 | 1  |
| 19 | 150 | 165 | 16 |
| 20 | 167 | 167 | 1  |
| 21 | 175 | 184 | 10 |
| 22 | 189 | 189 | 1  |
| 23 | 212 | 224 | 13 |
| 24 | 234 | 234 | 1  |
| 25 | 240 | 240 | 1  |
| 26 | 251 | 253 | 3  |
| 27 | 255 | 265 | 11 |
| 28 | 288 | 289 | 2  |
| 29 | 306 | 306 | 1  |
| 30 | 310 | 314 | 5  |
| 31 | 316 | 331 | 16 |
| 32 | 333 | 333 | 1  |
| 33 | 352 | 352 | 1  |
| 34 | 356 | 356 | 1  |
| 35 | 358 | 370 | 13 |
| 36 | 377 | 381 | 5  |
| 37 | 383 | 383 | 1  |
| 38 | 385 | 389 | 5  |
| 39 | 391 | 392 | 2  |
| 40 | 394 | 394 | 1  |
| 41 | 408 | 409 | 2  |
| 42 | 412 | 421 | 10 |
| 43 | 426 | 426 | 1  |
| 44 | 428 | 428 | 1  |
| 45 | 431 | 431 | 1  |
| 46 | 437 | 451 | 15 |
| 47 | 453 | 453 | 1  |
| 48 | 457 | 457 | 1  |
| 49 | 500 | 504 | 5  |

# 258 positions (cumulative volume <= 94 Angstrom^3)

|   | start | end | length |
|---|-------|-----|--------|
| 1 | 1     | 22  | 22     |
| 2 | 28    | 28  | 1      |
| 3 | 31    | 31  | 1      |
| 4 | 33    | 38  | 6      |
| 5 | 42    | 51  | 10     |
| 6 | 54    | 74  | 21     |

Supplementary Text 2

|    |     |     |    |
|----|-----|-----|----|
| 7  | 77  | 78  | 2  |
| 8  | 81  | 81  | 1  |
| 9  | 84  | 84  | 1  |
| 10 | 86  | 113 | 28 |
| 11 | 115 | 117 | 3  |
| 12 | 121 | 124 | 4  |
| 13 | 126 | 127 | 2  |
| 14 | 130 | 130 | 1  |
| 15 | 133 | 133 | 1  |
| 16 | 135 | 136 | 2  |
| 17 | 138 | 140 | 3  |
| 18 | 148 | 148 | 1  |
| 19 | 150 | 165 | 16 |
| 20 | 167 | 167 | 1  |
| 21 | 175 | 184 | 10 |
| 22 | 189 | 189 | 1  |
| 23 | 212 | 224 | 13 |
| 24 | 234 | 234 | 1  |
| 25 | 240 | 240 | 1  |
| 26 | 251 | 253 | 3  |
| 27 | 255 | 265 | 11 |
| 28 | 288 | 289 | 2  |
| 29 | 306 | 306 | 1  |
| 30 | 310 | 314 | 5  |
| 31 | 316 | 331 | 16 |
| 32 | 333 | 333 | 1  |
| 33 | 352 | 352 | 1  |
| 34 | 356 | 356 | 1  |
| 35 | 358 | 370 | 13 |
| 36 | 377 | 381 | 5  |
| 37 | 383 | 383 | 1  |
| 38 | 385 | 389 | 5  |
| 39 | 391 | 392 | 2  |
| 40 | 394 | 394 | 1  |
| 41 | 408 | 409 | 2  |
| 42 | 412 | 421 | 10 |
| 43 | 426 | 426 | 1  |
| 44 | 428 | 428 | 1  |
| 45 | 431 | 431 | 1  |
| 46 | 437 | 451 | 15 |
| 47 | 453 | 453 | 1  |
| 48 | 457 | 457 | 1  |
| 49 | 500 | 504 | 5  |

# 259 positions (cumulative volume <= 95 Angstrom^3)

|   | start | end | length |
|---|-------|-----|--------|
| 1 | 1     | 22  | 22     |
| 2 | 28    | 28  | 1      |
| 3 | 31    | 31  | 1      |
| 4 | 33    | 38  | 6      |
| 5 | 42    | 51  | 10     |

Supplementary Text 2

|    |     |     |    |
|----|-----|-----|----|
| 6  | 54  | 74  | 21 |
| 7  | 77  | 78  | 2  |
| 8  | 81  | 81  | 1  |
| 9  | 84  | 84  | 1  |
| 10 | 86  | 113 | 28 |
| 11 | 115 | 117 | 3  |
| 12 | 121 | 124 | 4  |
| 13 | 126 | 127 | 2  |
| 14 | 130 | 130 | 1  |
| 15 | 133 | 136 | 4  |
| 16 | 138 | 140 | 3  |
| 17 | 148 | 148 | 1  |
| 18 | 150 | 165 | 16 |
| 19 | 167 | 167 | 1  |
| 20 | 175 | 184 | 10 |
| 21 | 189 | 189 | 1  |
| 22 | 212 | 224 | 13 |
| 23 | 234 | 234 | 1  |
| 24 | 240 | 240 | 1  |
| 25 | 251 | 253 | 3  |
| 26 | 255 | 265 | 11 |
| 27 | 288 | 289 | 2  |
| 28 | 306 | 306 | 1  |
| 29 | 310 | 314 | 5  |
| 30 | 316 | 331 | 16 |
| 31 | 333 | 333 | 1  |
| 32 | 352 | 352 | 1  |
| 33 | 356 | 356 | 1  |
| 34 | 358 | 370 | 13 |
| 35 | 377 | 381 | 5  |
| 36 | 383 | 383 | 1  |
| 37 | 385 | 389 | 5  |
| 38 | 391 | 392 | 2  |
| 39 | 394 | 394 | 1  |
| 40 | 408 | 409 | 2  |
| 41 | 412 | 421 | 10 |
| 42 | 426 | 426 | 1  |
| 43 | 428 | 428 | 1  |
| 44 | 431 | 431 | 1  |
| 45 | 437 | 451 | 15 |
| 46 | 453 | 453 | 1  |
| 47 | 457 | 457 | 1  |
| 48 | 500 | 504 | 5  |

# 260 positions (cumulative volume <= 96 Angstrom^3)

|   | start | end | length |
|---|-------|-----|--------|
| 1 | 1     | 22  | 22     |
| 2 | 28    | 28  | 1      |
| 3 | 31    | 31  | 1      |
| 4 | 33    | 38  | 6      |
| 5 | 42    | 51  | 10     |

Supplementary Text 2

|    |     |     |    |
|----|-----|-----|----|
| 6  | 54  | 74  | 21 |
| 7  | 77  | 78  | 2  |
| 8  | 81  | 81  | 1  |
| 9  | 84  | 84  | 1  |
| 10 | 86  | 113 | 28 |
| 11 | 115 | 117 | 3  |
| 12 | 121 | 124 | 4  |
| 13 | 126 | 127 | 2  |
| 14 | 130 | 130 | 1  |
| 15 | 133 | 136 | 4  |
| 16 | 138 | 140 | 3  |
| 17 | 148 | 148 | 1  |
| 18 | 150 | 165 | 16 |
| 19 | 167 | 167 | 1  |
| 20 | 175 | 184 | 10 |
| 21 | 189 | 189 | 1  |
| 22 | 212 | 224 | 13 |
| 23 | 234 | 234 | 1  |
| 24 | 240 | 240 | 1  |
| 25 | 251 | 253 | 3  |
| 26 | 255 | 265 | 11 |
| 27 | 288 | 289 | 2  |
| 28 | 306 | 306 | 1  |
| 29 | 310 | 314 | 5  |
| 30 | 316 | 331 | 16 |
| 31 | 333 | 333 | 1  |
| 32 | 352 | 352 | 1  |
| 33 | 356 | 356 | 1  |
| 34 | 358 | 370 | 13 |
| 35 | 377 | 381 | 5  |
| 36 | 383 | 383 | 1  |
| 37 | 385 | 389 | 5  |
| 38 | 391 | 392 | 2  |
| 39 | 394 | 394 | 1  |
| 40 | 408 | 409 | 2  |
| 41 | 412 | 421 | 10 |
| 42 | 426 | 426 | 1  |
| 43 | 428 | 429 | 2  |
| 44 | 431 | 431 | 1  |
| 45 | 437 | 451 | 15 |
| 46 | 453 | 453 | 1  |
| 47 | 457 | 457 | 1  |
| 48 | 500 | 504 | 5  |

# 261 positions (cumulative volume <= 97 Angstrom^3)

|   | start | end | length |
|---|-------|-----|--------|
| 1 | 1     | 22  | 22     |
| 2 | 28    | 28  | 1      |
| 3 | 31    | 31  | 1      |
| 4 | 33    | 38  | 6      |
| 5 | 42    | 51  | 10     |



Supplementary Text 2

|    |     |     |    |
|----|-----|-----|----|
| 6  | 54  | 74  | 21 |
| 7  | 77  | 78  | 2  |
| 8  | 81  | 81  | 1  |
| 9  | 84  | 84  | 1  |
| 10 | 86  | 113 | 28 |
| 11 | 115 | 117 | 3  |
| 12 | 121 | 127 | 7  |
| 13 | 130 | 130 | 1  |
| 14 | 133 | 136 | 4  |
| 15 | 138 | 140 | 3  |
| 16 | 148 | 148 | 1  |
| 17 | 150 | 165 | 16 |
| 18 | 167 | 167 | 1  |
| 19 | 175 | 184 | 10 |
| 20 | 189 | 189 | 1  |
| 21 | 212 | 224 | 13 |
| 22 | 234 | 234 | 1  |
| 23 | 240 | 240 | 1  |
| 24 | 251 | 253 | 3  |
| 25 | 255 | 265 | 11 |
| 26 | 288 | 289 | 2  |
| 27 | 306 | 306 | 1  |
| 28 | 310 | 314 | 5  |
| 29 | 316 | 331 | 16 |
| 30 | 333 | 333 | 1  |
| 31 | 352 | 352 | 1  |
| 32 | 356 | 356 | 1  |
| 33 | 358 | 370 | 13 |
| 34 | 377 | 381 | 5  |
| 35 | 383 | 383 | 1  |
| 36 | 385 | 389 | 5  |
| 37 | 391 | 392 | 2  |
| 38 | 394 | 394 | 1  |
| 39 | 408 | 409 | 2  |
| 40 | 412 | 421 | 10 |
| 41 | 426 | 426 | 1  |
| 42 | 428 | 429 | 2  |
| 43 | 431 | 431 | 1  |
| 44 | 437 | 451 | 15 |
| 45 | 453 | 453 | 1  |
| 46 | 457 | 457 | 1  |
| 47 | 500 | 504 | 5  |

# 262 positions (cumulative volume <= 98 Angstrom^3)

|   | start | end | length |
|---|-------|-----|--------|
| 1 | 1     | 22  | 22     |
| 2 | 28    | 28  | 1      |
| 3 | 31    | 31  | 1      |
| 4 | 33    | 38  | 6      |
| 5 | 42    | 51  | 10     |
| 6 | 54    | 74  | 21     |

Supplementary Text 2

|    |     |     |    |
|----|-----|-----|----|
| 7  | 77  | 78  | 2  |
| 8  | 81  | 81  | 1  |
| 9  | 84  | 84  | 1  |
| 10 | 86  | 113 | 28 |
| 11 | 115 | 117 | 3  |
| 12 | 121 | 127 | 7  |
| 13 | 130 | 130 | 1  |
| 14 | 133 | 136 | 4  |
| 15 | 138 | 140 | 3  |
| 16 | 148 | 148 | 1  |
| 17 | 150 | 165 | 16 |
| 18 | 167 | 167 | 1  |
| 19 | 175 | 184 | 10 |
| 20 | 189 | 189 | 1  |
| 21 | 212 | 224 | 13 |
| 22 | 234 | 234 | 1  |
| 23 | 240 | 240 | 1  |
| 24 | 251 | 253 | 3  |
| 25 | 255 | 265 | 11 |
| 26 | 288 | 289 | 2  |
| 27 | 306 | 306 | 1  |
| 28 | 310 | 314 | 5  |
| 29 | 316 | 333 | 18 |
| 30 | 352 | 352 | 1  |
| 31 | 356 | 356 | 1  |
| 32 | 358 | 370 | 13 |
| 33 | 377 | 381 | 5  |
| 34 | 383 | 383 | 1  |
| 35 | 385 | 389 | 5  |
| 36 | 391 | 392 | 2  |
| 37 | 394 | 394 | 1  |
| 38 | 408 | 409 | 2  |
| 39 | 412 | 421 | 10 |
| 40 | 426 | 426 | 1  |
| 41 | 428 | 429 | 2  |
| 42 | 431 | 431 | 1  |
| 43 | 437 | 451 | 15 |
| 44 | 453 | 453 | 1  |
| 45 | 457 | 457 | 1  |
| 46 | 500 | 504 | 5  |

# 263 positions (cumulative volume <= 99 Angstrom^3)

|   | start | end | length |
|---|-------|-----|--------|
| 1 | 1     | 22  | 22     |
| 2 | 28    | 28  | 1      |
| 3 | 31    | 31  | 1      |
| 4 | 33    | 38  | 6      |
| 5 | 42    | 51  | 10     |
| 6 | 54    | 74  | 21     |
| 7 | 77    | 78  | 2      |
| 8 | 81    | 81  | 1      |

Supplementary Text 2

|    |     |     |    |
|----|-----|-----|----|
| 9  | 84  | 84  | 1  |
| 10 | 86  | 113 | 28 |
| 11 | 115 | 117 | 3  |
| 12 | 121 | 127 | 7  |
| 13 | 130 | 130 | 1  |
| 14 | 133 | 136 | 4  |
| 15 | 138 | 140 | 3  |
| 16 | 148 | 148 | 1  |
| 17 | 150 | 165 | 16 |
| 18 | 167 | 167 | 1  |
| 19 | 175 | 184 | 10 |
| 20 | 189 | 189 | 1  |
| 21 | 212 | 224 | 13 |
| 22 | 234 | 234 | 1  |
| 23 | 240 | 240 | 1  |
| 24 | 251 | 253 | 3  |
| 25 | 255 | 265 | 11 |
| 26 | 288 | 289 | 2  |
| 27 | 306 | 306 | 1  |
| 28 | 310 | 314 | 5  |
| 29 | 316 | 333 | 18 |
| 30 | 352 | 352 | 1  |
| 31 | 356 | 356 | 1  |
| 32 | 358 | 370 | 13 |
| 33 | 377 | 381 | 5  |
| 34 | 383 | 383 | 1  |
| 35 | 385 | 389 | 5  |
| 36 | 391 | 392 | 2  |
| 37 | 394 | 394 | 1  |
| 38 | 408 | 410 | 3  |
| 39 | 412 | 421 | 10 |
| 40 | 426 | 426 | 1  |
| 41 | 428 | 429 | 2  |
| 42 | 431 | 431 | 1  |
| 43 | 437 | 451 | 15 |
| 44 | 453 | 453 | 1  |
| 45 | 457 | 457 | 1  |
| 46 | 500 | 504 | 5  |

# 264 positions (cumulative volume <= 100 Angstrom^3)

|    | start | end | length |
|----|-------|-----|--------|
| 1  | 1     | 22  | 22     |
| 2  | 28    | 28  | 1      |
| 3  | 31    | 31  | 1      |
| 4  | 33    | 38  | 6      |
| 5  | 42    | 51  | 10     |
| 6  | 54    | 74  | 21     |
| 7  | 77    | 78  | 2      |
| 8  | 81    | 81  | 1      |
| 9  | 84    | 84  | 1      |
| 10 | 86    | 113 | 28     |

Supplementary Text 2

|    |     |     |    |
|----|-----|-----|----|
| 11 | 115 | 117 | 3  |
| 12 | 121 | 127 | 7  |
| 13 | 130 | 130 | 1  |
| 14 | 133 | 136 | 4  |
| 15 | 138 | 140 | 3  |
| 16 | 148 | 148 | 1  |
| 17 | 150 | 165 | 16 |
| 18 | 167 | 167 | 1  |
| 19 | 175 | 184 | 10 |
| 20 | 189 | 189 | 1  |
| 21 | 212 | 224 | 13 |
| 22 | 234 | 234 | 1  |
| 23 | 240 | 240 | 1  |
| 24 | 251 | 253 | 3  |
| 25 | 255 | 265 | 11 |
| 26 | 283 | 283 | 1  |
| 27 | 288 | 289 | 2  |
| 28 | 306 | 306 | 1  |
| 29 | 310 | 314 | 5  |
| 30 | 316 | 333 | 18 |
| 31 | 352 | 352 | 1  |
| 32 | 356 | 356 | 1  |
| 33 | 358 | 370 | 13 |
| 34 | 377 | 381 | 5  |
| 35 | 383 | 383 | 1  |
| 36 | 385 | 389 | 5  |
| 37 | 391 | 392 | 2  |
| 38 | 394 | 394 | 1  |
| 39 | 408 | 410 | 3  |
| 40 | 412 | 421 | 10 |
| 41 | 426 | 426 | 1  |
| 42 | 428 | 429 | 2  |
| 43 | 431 | 431 | 1  |
| 44 | 437 | 451 | 15 |
| 45 | 453 | 453 | 1  |
| 46 | 457 | 457 | 1  |
| 47 | 500 | 504 | 5  |

CORE DATA FOR CHARACTERIZED AND PUTATIVE CLASS C ENZYMES (n=96)

core size 362 of 363 vol = 3050.361  
core size 361 of 363 vol = 2087.572  
core size 360 of 363 vol = 1064.898  
core size 359 of 363 vol = 139.944  
core size 358 of 363 vol = 131.587  
core size 357 of 363 vol = 124.582  
core size 356 of 363 vol = 118.752  
core size 355 of 363 vol = 113.162  
core size 354 of 363 vol = 107.56

Supplementary Text 2

core size 353 of 363 vol = 102.196  
core size 352 of 363 vol = 97.655  
core size 351 of 363 vol = 92.825  
core size 350 of 363 vol = 89.158  
core size 349 of 363 vol = 85.604  
core size 348 of 363 vol = 82.166  
core size 347 of 363 vol = 78.74  
core size 346 of 363 vol = 74.967  
core size 345 of 363 vol = 71.143  
core size 344 of 363 vol = 67.594  
core size 343 of 363 vol = 64.59  
core size 342 of 363 vol = 61.823  
core size 341 of 363 vol = 59.387  
core size 340 of 363 vol = 56.728  
core size 339 of 363 vol = 54.176  
core size 338 of 363 vol = 51.649  
core size 337 of 363 vol = 49.366  
core size 336 of 363 vol = 46.966  
core size 335 of 363 vol = 44.816  
core size 334 of 363 vol = 42.777  
core size 333 of 363 vol = 41.035  
core size 332 of 363 vol = 39.574  
core size 331 of 363 vol = 38.153  
core size 330 of 363 vol = 36.722  
core size 329 of 363 vol = 35.414  
core size 328 of 363 vol = 34.218  
core size 327 of 363 vol = 33.367  
core size 326 of 363 vol = 32.483  
core size 325 of 363 vol = 31.622  
core size 324 of 363 vol = 30.833  
core size 323 of 363 vol = 30.042  
core size 322 of 363 vol = 29.314  
core size 321 of 363 vol = 28.688  
core size 320 of 363 vol = 28.096  
core size 319 of 363 vol = 27.596  
core size 318 of 363 vol = 27.075  
core size 317 of 363 vol = 26.622  
core size 316 of 363 vol = 26.111  
core size 315 of 363 vol = 25.565  
core size 314 of 363 vol = 25.056  
core size 313 of 363 vol = 24.594  
core size 312 of 363 vol = 24.163  
core size 311 of 363 vol = 23.716  
core size 310 of 363 vol = 23.344  
core size 309 of 363 vol = 22.984  
core size 308 of 363 vol = 22.675  
core size 307 of 363 vol = 22.356  
core size 306 of 363 vol = 22.003  
core size 305 of 363 vol = 21.666  
core size 304 of 363 vol = 21.296

Supplementary Text 2

core size 303 of 363 vol = 20.932  
core size 302 of 363 vol = 20.596  
core size 301 of 363 vol = 20.27  
core size 300 of 363 vol = 19.925  
core size 299 of 363 vol = 19.629  
core size 298 of 363 vol = 19.326  
core size 297 of 363 vol = 19.007  
core size 296 of 363 vol = 18.689  
core size 295 of 363 vol = 18.368  
core size 294 of 363 vol = 18.05  
core size 293 of 363 vol = 17.733  
core size 292 of 363 vol = 17.442  
core size 291 of 363 vol = 17.158  
core size 290 of 363 vol = 16.905  
core size 289 of 363 vol = 16.618  
core size 288 of 363 vol = 16.365  
core size 287 of 363 vol = 16.127  
core size 286 of 363 vol = 15.877  
core size 285 of 363 vol = 15.638  
core size 284 of 363 vol = 15.384  
core size 283 of 363 vol = 15.188  
core size 282 of 363 vol = 14.974  
core size 281 of 363 vol = 14.754  
core size 280 of 363 vol = 14.523  
core size 279 of 363 vol = 14.307  
core size 278 of 363 vol = 14.065  
core size 277 of 363 vol = 13.832  
core size 276 of 363 vol = 13.588  
core size 275 of 363 vol = 13.329  
core size 274 of 363 vol = 13.098  
core size 273 of 363 vol = 12.878  
core size 272 of 363 vol = 12.666  
core size 271 of 363 vol = 12.447  
core size 270 of 363 vol = 12.274  
core size 269 of 363 vol = 12.091  
core size 268 of 363 vol = 11.872  
core size 267 of 363 vol = 11.694  
core size 266 of 363 vol = 11.506  
core size 265 of 363 vol = 11.309  
core size 264 of 363 vol = 11.095  
core size 263 of 363 vol = 10.916  
core size 262 of 363 vol = 10.754  
core size 261 of 363 vol = 10.591  
core size 260 of 363 vol = 10.44  
core size 259 of 363 vol = 10.273  
core size 258 of 363 vol = 10.123  
core size 257 of 363 vol = 9.969  
core size 256 of 363 vol = 9.836  
core size 255 of 363 vol = 9.691  
core size 254 of 363 vol = 9.56

Supplementary Text 2

core size 253 of 363 vol = 9.428  
core size 252 of 363 vol = 9.32  
core size 251 of 363 vol = 9.192  
core size 250 of 363 vol = 9.064  
core size 249 of 363 vol = 8.918  
core size 248 of 363 vol = 8.797  
core size 247 of 363 vol = 8.661  
core size 246 of 363 vol = 8.521  
core size 245 of 363 vol = 8.402  
core size 244 of 363 vol = 8.289  
core size 243 of 363 vol = 8.16  
core size 242 of 363 vol = 8.03  
core size 241 of 363 vol = 7.919  
core size 240 of 363 vol = 7.82  
core size 239 of 363 vol = 7.693  
core size 238 of 363 vol = 7.592  
core size 237 of 363 vol = 7.478  
core size 236 of 363 vol = 7.391  
core size 235 of 363 vol = 7.254  
core size 234 of 363 vol = 7.15  
core size 233 of 363 vol = 7.052  
core size 232 of 363 vol = 6.935  
core size 231 of 363 vol = 6.845  
core size 230 of 363 vol = 6.751  
core size 229 of 363 vol = 6.648  
core size 228 of 363 vol = 6.554  
core size 227 of 363 vol = 6.494  
core size 226 of 363 vol = 6.413  
core size 225 of 363 vol = 6.329  
core size 224 of 363 vol = 6.255  
core size 223 of 363 vol = 6.167  
core size 222 of 363 vol = 6.096  
core size 221 of 363 vol = 6.03  
core size 220 of 363 vol = 5.954  
core size 219 of 363 vol = 5.868  
core size 218 of 363 vol = 5.789  
core size 217 of 363 vol = 5.726  
core size 216 of 363 vol = 5.65  
core size 215 of 363 vol = 5.583  
core size 214 of 363 vol = 5.522  
core size 213 of 363 vol = 5.48  
core size 212 of 363 vol = 5.404  
core size 211 of 363 vol = 5.356  
core size 210 of 363 vol = 5.28  
core size 209 of 363 vol = 5.197  
core size 208 of 363 vol = 5.131  
core size 207 of 363 vol = 5.057  
core size 206 of 363 vol = 4.97  
core size 205 of 363 vol = 4.908  
core size 204 of 363 vol = 4.837

Supplementary Text 2

core size 203 of 363 vol = 4.773  
core size 202 of 363 vol = 4.709  
core size 201 of 363 vol = 4.64  
core size 200 of 363 vol = 4.579  
core size 199 of 363 vol = 4.53  
core size 198 of 363 vol = 4.483  
core size 197 of 363 vol = 4.454  
core size 196 of 363 vol = 4.398  
core size 195 of 363 vol = 4.353  
core size 194 of 363 vol = 4.307  
core size 193 of 363 vol = 4.261  
core size 192 of 363 vol = 4.215  
core size 191 of 363 vol = 4.156  
core size 190 of 363 vol = 4.099  
core size 189 of 363 vol = 4.05  
core size 188 of 363 vol = 3.993  
core size 187 of 363 vol = 3.937  
core size 186 of 363 vol = 3.896  
core size 185 of 363 vol = 3.852  
core size 184 of 363 vol = 3.793  
core size 183 of 363 vol = 3.734  
core size 182 of 363 vol = 3.684  
core size 181 of 363 vol = 3.653  
core size 180 of 363 vol = 3.603  
core size 179 of 363 vol = 3.559  
core size 178 of 363 vol = 3.525  
core size 177 of 363 vol = 3.494  
core size 176 of 363 vol = 3.461  
core size 175 of 363 vol = 3.427  
core size 174 of 363 vol = 3.394  
core size 173 of 363 vol = 3.351  
core size 172 of 363 vol = 3.319  
core size 171 of 363 vol = 3.296  
core size 170 of 363 vol = 3.268  
core size 169 of 363 vol = 3.233  
core size 168 of 363 vol = 3.2  
core size 167 of 363 vol = 3.164  
core size 166 of 363 vol = 3.125  
core size 165 of 363 vol = 3.092  
core size 164 of 363 vol = 3.058  
core size 163 of 363 vol = 3.031  
core size 162 of 363 vol = 2.979  
core size 161 of 363 vol = 2.928  
core size 160 of 363 vol = 2.894  
core size 159 of 363 vol = 2.86  
core size 158 of 363 vol = 2.817  
core size 157 of 363 vol = 2.783  
core size 156 of 363 vol = 2.745  
core size 155 of 363 vol = 2.704  
core size 154 of 363 vol = 2.665



Supplementary Text 2

core size 153 of 363 vol = 2.639  
core size 152 of 363 vol = 2.602  
core size 151 of 363 vol = 2.565  
core size 150 of 363 vol = 2.524  
core size 149 of 363 vol = 2.482  
core size 148 of 363 vol = 2.442  
core size 147 of 363 vol = 2.399  
core size 146 of 363 vol = 2.365  
core size 145 of 363 vol = 2.346  
core size 144 of 363 vol = 2.315  
core size 143 of 363 vol = 2.274  
core size 142 of 363 vol = 2.246  
core size 141 of 363 vol = 2.214  
core size 140 of 363 vol = 2.181  
core size 139 of 363 vol = 2.145  
core size 138 of 363 vol = 2.112  
core size 137 of 363 vol = 2.079  
core size 136 of 363 vol = 2.063  
core size 135 of 363 vol = 2.043  
core size 134 of 363 vol = 2.006  
core size 133 of 363 vol = 1.96  
core size 132 of 363 vol = 1.936  
core size 131 of 363 vol = 1.909  
core size 130 of 363 vol = 1.882  
core size 129 of 363 vol = 1.855  
core size 128 of 363 vol = 1.827  
core size 127 of 363 vol = 1.797  
core size 126 of 363 vol = 1.766  
core size 125 of 363 vol = 1.74  
core size 124 of 363 vol = 1.717  
core size 123 of 363 vol = 1.694  
core size 122 of 363 vol = 1.665  
core size 121 of 363 vol = 1.642  
core size 120 of 363 vol = 1.612  
core size 119 of 363 vol = 1.594  
core size 118 of 363 vol = 1.575  
core size 117 of 363 vol = 1.547  
core size 116 of 363 vol = 1.515  
core size 115 of 363 vol = 1.483  
core size 114 of 363 vol = 1.46  
core size 113 of 363 vol = 1.445  
core size 112 of 363 vol = 1.427  
core size 111 of 363 vol = 1.411  
core size 110 of 363 vol = 1.387  
core size 109 of 363 vol = 1.363  
core size 108 of 363 vol = 1.342  
core size 107 of 363 vol = 1.319  
core size 106 of 363 vol = 1.296  
core size 105 of 363 vol = 1.272  
core size 104 of 363 vol = 1.255

Supplementary Text 2

core size 103 of 363 vol = 1.232  
core size 102 of 363 vol = 1.208  
core size 101 of 363 vol = 1.18  
core size 100 of 363 vol = 1.162  
core size 99 of 363 vol = 1.136  
core size 98 of 363 vol = 1.102  
core size 97 of 363 vol = 1.08  
core size 96 of 363 vol = 1.059  
core size 95 of 363 vol = 1.038  
core size 94 of 363 vol = 1.019  
core size 93 of 363 vol = 0.999  
core size 92 of 363 vol = 0.976  
core size 91 of 363 vol = 0.957  
core size 90 of 363 vol = 0.938  
core size 89 of 363 vol = 0.92  
core size 88 of 363 vol = 0.9  
core size 87 of 363 vol = 0.873  
core size 86 of 363 vol = 0.853  
core size 85 of 363 vol = 0.836  
core size 84 of 363 vol = 0.822  
core size 83 of 363 vol = 0.808  
core size 82 of 363 vol = 0.802  
core size 81 of 363 vol = 0.788  
core size 80 of 363 vol = 0.772  
core size 79 of 363 vol = 0.753  
core size 78 of 363 vol = 0.732  
core size 77 of 363 vol = 0.72  
core size 76 of 363 vol = 0.698  
core size 75 of 363 vol = 0.683  
core size 74 of 363 vol = 0.674  
core size 73 of 363 vol = 0.653  
core size 72 of 363 vol = 0.634  
core size 71 of 363 vol = 0.615  
core size 70 of 363 vol = 0.599  
core size 69 of 363 vol = 0.587  
core size 68 of 363 vol = 0.575  
core size 67 of 363 vol = 0.558  
core size 66 of 363 vol = 0.542  
core size 65 of 363 vol = 0.522  
core size 64 of 363 vol = 0.501  
core size 63 of 363 vol = 0.481  
FINISHED: Min vol ( 0.5 ) reached

# 94 positions (cumulative volume <= 1 Angstrom^3)

|   | start | end | length |
|---|-------|-----|--------|
| 1 | 3     | 3   | 1      |
| 2 | 9     | 9   | 1      |
| 3 | 13    | 14  | 2      |
| 4 | 17    | 19  | 3      |
| 5 | 46    | 51  | 6      |

Supplementary Text 2

|    |     |     |    |
|----|-----|-----|----|
| 6  | 54  | 72  | 19 |
| 7  | 78  | 78  | 1  |
| 8  | 89  | 89  | 1  |
| 9  | 91  | 91  | 1  |
| 10 | 93  | 93  | 1  |
| 11 | 95  | 96  | 2  |
| 12 | 98  | 98  | 1  |
| 13 | 100 | 104 | 5  |
| 14 | 112 | 113 | 2  |
| 15 | 115 | 115 | 1  |
| 16 | 134 | 136 | 3  |
| 17 | 140 | 140 | 1  |
| 18 | 152 | 162 | 11 |
| 19 | 165 | 165 | 1  |
| 20 | 216 | 216 | 1  |
| 21 | 252 | 252 | 1  |
| 22 | 255 | 256 | 2  |
| 23 | 259 | 259 | 1  |
| 24 | 263 | 263 | 1  |
| 25 | 322 | 323 | 2  |
| 26 | 363 | 368 | 6  |
| 27 | 377 | 378 | 2  |
| 28 | 386 | 388 | 3  |
| 29 | 414 | 416 | 3  |
| 30 | 439 | 439 | 1  |
| 31 | 441 | 447 | 7  |
| 32 | 449 | 449 | 1  |

# 134 positions (cumulative volume <= 2 Angstrom^3)

|    | start | end | length |
|----|-------|-----|--------|
| 1  | 3     | 6   | 4      |
| 2  | 8     | 10  | 3      |
| 3  | 13    | 19  | 7      |
| 4  | 31    | 31  | 1      |
| 5  | 38    | 38  | 1      |
| 6  | 46    | 52  | 7      |
| 7  | 54    | 74  | 21     |
| 8  | 78    | 78  | 1      |
| 9  | 89    | 89  | 1      |
| 10 | 91    | 98  | 8      |
| 11 | 100   | 104 | 5      |
| 12 | 110   | 113 | 4      |
| 13 | 115   | 117 | 3      |
| 14 | 121   | 121 | 1      |
| 15 | 123   | 124 | 2      |
| 16 | 134   | 137 | 4      |
| 17 | 140   | 140 | 1      |
| 18 | 150   | 150 | 1      |
| 19 | 152   | 162 | 11     |
| 20 | 164   | 165 | 2      |
| 21 | 216   | 216 | 1      |

Supplementary Text 2

|    |     |     |    |
|----|-----|-----|----|
| 22 | 252 | 252 | 1  |
| 23 | 255 | 256 | 2  |
| 24 | 259 | 259 | 1  |
| 25 | 263 | 264 | 2  |
| 26 | 320 | 323 | 4  |
| 27 | 363 | 369 | 7  |
| 28 | 375 | 381 | 7  |
| 29 | 386 | 388 | 3  |
| 30 | 390 | 391 | 2  |
| 31 | 414 | 416 | 3  |
| 32 | 437 | 449 | 13 |

# 163 positions (cumulative volume <= 3 Angstrom^3)

|    | start | end | length |
|----|-------|-----|--------|
| 1  | 3     | 6   | 4      |
| 2  | 8     | 20  | 13     |
| 3  | 31    | 31  | 1      |
| 4  | 33    | 33  | 1      |
| 5  | 36    | 36  | 1      |
| 6  | 38    | 38  | 1      |
| 7  | 46    | 74  | 29     |
| 8  | 78    | 78  | 1      |
| 9  | 87    | 87  | 1      |
| 10 | 89    | 98  | 10     |
| 11 | 100   | 105 | 6      |
| 12 | 110   | 113 | 4      |
| 13 | 115   | 117 | 3      |
| 14 | 120   | 124 | 5      |
| 15 | 126   | 126 | 1      |
| 16 | 130   | 130 | 1      |
| 17 | 133   | 141 | 9      |
| 18 | 150   | 150 | 1      |
| 19 | 152   | 162 | 11     |
| 20 | 164   | 165 | 2      |
| 21 | 215   | 216 | 2      |
| 22 | 252   | 253 | 2      |
| 23 | 255   | 256 | 2      |
| 24 | 259   | 260 | 2      |
| 25 | 262   | 265 | 4      |
| 26 | 320   | 323 | 4      |
| 27 | 325   | 325 | 1      |
| 28 | 361   | 361 | 1      |
| 29 | 363   | 369 | 7      |
| 30 | 375   | 381 | 7      |
| 31 | 383   | 383 | 1      |
| 32 | 385   | 391 | 7      |
| 33 | 414   | 416 | 3      |
| 34 | 428   | 428 | 1      |
| 35 | 436   | 449 | 14     |

# 189 positions (cumulative volume <= 4 Angstrom^3)

|  | start | end | length |
|--|-------|-----|--------|
|--|-------|-----|--------|

Supplementary Text 2

|    |     |     |    |
|----|-----|-----|----|
| 1  | 3   | 6   | 4  |
| 2  | 8   | 20  | 13 |
| 3  | 30  | 31  | 2  |
| 4  | 33  | 34  | 2  |
| 5  | 36  | 38  | 3  |
| 6  | 40  | 40  | 1  |
| 7  | 46  | 74  | 29 |
| 8  | 78  | 78  | 1  |
| 9  | 87  | 87  | 1  |
| 10 | 89  | 105 | 17 |
| 11 | 110 | 113 | 4  |
| 12 | 115 | 117 | 3  |
| 13 | 120 | 130 | 11 |
| 14 | 133 | 141 | 9  |
| 15 | 150 | 165 | 16 |
| 16 | 176 | 176 | 1  |
| 17 | 180 | 180 | 1  |
| 18 | 214 | 216 | 3  |
| 19 | 225 | 225 | 1  |
| 20 | 251 | 253 | 3  |
| 21 | 255 | 256 | 2  |
| 22 | 259 | 260 | 2  |
| 23 | 262 | 265 | 4  |
| 24 | 317 | 325 | 9  |
| 25 | 361 | 369 | 9  |
| 26 | 375 | 383 | 9  |
| 27 | 385 | 392 | 8  |
| 28 | 410 | 410 | 1  |
| 29 | 413 | 416 | 4  |
| 30 | 428 | 429 | 2  |
| 31 | 436 | 449 | 14 |

# 207 positions (cumulative volume <= 5 Angstrom^3)

|    | start | end | length |
|----|-------|-----|--------|
| 1  | 3     | 20  | 18     |
| 2  | 30    | 31  | 2      |
| 3  | 33    | 34  | 2      |
| 4  | 36    | 41  | 6      |
| 5  | 45    | 74  | 30     |
| 6  | 77    | 78  | 2      |
| 7  | 86    | 87  | 2      |
| 8  | 89    | 106 | 18     |
| 9  | 109   | 117 | 9      |
| 10 | 120   | 130 | 11     |
| 11 | 133   | 141 | 9      |
| 12 | 148   | 165 | 18     |
| 13 | 173   | 173 | 1      |
| 14 | 175   | 176 | 2      |
| 15 | 179   | 180 | 2      |
| 16 | 213   | 216 | 4      |
| 17 | 225   | 225 | 1      |

Supplementary Text 2

|    |     |     |    |
|----|-----|-----|----|
| 18 | 251 | 253 | 3  |
| 19 | 255 | 256 | 2  |
| 20 | 259 | 260 | 2  |
| 21 | 262 | 265 | 4  |
| 22 | 316 | 325 | 10 |
| 23 | 361 | 369 | 9  |
| 24 | 375 | 392 | 18 |
| 25 | 409 | 410 | 2  |
| 26 | 413 | 416 | 4  |
| 27 | 428 | 429 | 2  |
| 28 | 436 | 449 | 14 |

# 221 positions (cumulative volume <= 6 Angstrom^3)

|    | start | end | length |
|----|-------|-----|--------|
| 1  | 2     | 21  | 20     |
| 2  | 30    | 34  | 5      |
| 3  | 36    | 42  | 7      |
| 4  | 45    | 74  | 30     |
| 5  | 76    | 79  | 4      |
| 6  | 86    | 87  | 2      |
| 7  | 89    | 107 | 19     |
| 8  | 109   | 117 | 9      |
| 9  | 119   | 130 | 12     |
| 10 | 133   | 141 | 9      |
| 11 | 148   | 166 | 19     |
| 12 | 173   | 173 | 1      |
| 13 | 175   | 176 | 2      |
| 14 | 179   | 180 | 2      |
| 15 | 213   | 216 | 4      |
| 16 | 225   | 225 | 1      |
| 17 | 251   | 253 | 3      |
| 18 | 255   | 260 | 6      |
| 19 | 262   | 265 | 4      |
| 20 | 316   | 325 | 10     |
| 21 | 361   | 369 | 9      |
| 22 | 375   | 392 | 18     |
| 23 | 408   | 410 | 3      |
| 24 | 413   | 416 | 4      |
| 25 | 428   | 429 | 2      |
| 26 | 433   | 433 | 1      |
| 27 | 436   | 450 | 15     |

# 233 positions (cumulative volume <= 7 Angstrom^3)

|   | start | end | length |
|---|-------|-----|--------|
| 1 | 2     | 22  | 21     |
| 2 | 30    | 42  | 13     |
| 3 | 44    | 74  | 31     |
| 4 | 76    | 79  | 4      |
| 5 | 86    | 87  | 2      |
| 6 | 89    | 107 | 19     |
| 7 | 109   | 117 | 9      |
| 8 | 119   | 130 | 12     |

Supplementary Text 2

|    |     |     |    |
|----|-----|-----|----|
| 9  | 133 | 142 | 10 |
| 10 | 148 | 166 | 19 |
| 11 | 173 | 173 | 1  |
| 12 | 175 | 176 | 2  |
| 13 | 179 | 180 | 2  |
| 14 | 212 | 216 | 5  |
| 15 | 225 | 225 | 1  |
| 16 | 227 | 227 | 1  |
| 17 | 234 | 234 | 1  |
| 18 | 251 | 253 | 3  |
| 19 | 255 | 260 | 6  |
| 20 | 262 | 265 | 4  |
| 21 | 316 | 325 | 10 |
| 22 | 358 | 358 | 1  |
| 23 | 361 | 369 | 9  |
| 24 | 375 | 392 | 18 |
| 25 | 407 | 410 | 4  |
| 26 | 412 | 416 | 5  |
| 27 | 426 | 426 | 1  |
| 28 | 428 | 429 | 2  |
| 29 | 433 | 433 | 1  |
| 30 | 435 | 450 | 16 |

# 242 positions (cumulative volume <= 8 Angstrom^3)

|    | start | end | length |
|----|-------|-----|--------|
| 1  | 2     | 22  | 21     |
| 2  | 30    | 42  | 13     |
| 3  | 44    | 79  | 36     |
| 4  | 86    | 87  | 2      |
| 5  | 89    | 107 | 19     |
| 6  | 109   | 117 | 9      |
| 7  | 119   | 130 | 12     |
| 8  | 133   | 142 | 10     |
| 9  | 148   | 166 | 19     |
| 10 | 173   | 177 | 5      |
| 11 | 179   | 180 | 2      |
| 12 | 212   | 216 | 5      |
| 13 | 225   | 225 | 1      |
| 14 | 227   | 227 | 1      |
| 15 | 234   | 234 | 1      |
| 16 | 251   | 253 | 3      |
| 17 | 255   | 265 | 11     |
| 18 | 316   | 325 | 10     |
| 19 | 358   | 358 | 1      |
| 20 | 361   | 370 | 10     |
| 21 | 375   | 392 | 18     |
| 22 | 407   | 416 | 10     |
| 23 | 426   | 429 | 4      |
| 24 | 432   | 450 | 19     |

# 250 positions (cumulative volume <= 9 Angstrom^3)

|  | start | end | length |
|--|-------|-----|--------|
|--|-------|-----|--------|

Supplementary Text 2

|    |     |     |    |
|----|-----|-----|----|
| 1  | 2   | 22  | 21 |
| 2  | 29  | 42  | 14 |
| 3  | 44  | 79  | 36 |
| 4  | 86  | 87  | 2  |
| 5  | 89  | 107 | 19 |
| 6  | 109 | 117 | 9  |
| 7  | 119 | 130 | 12 |
| 8  | 133 | 142 | 10 |
| 9  | 144 | 145 | 2  |
| 10 | 148 | 166 | 19 |
| 11 | 173 | 180 | 8  |
| 12 | 212 | 216 | 5  |
| 13 | 225 | 225 | 1  |
| 14 | 227 | 227 | 1  |
| 15 | 231 | 231 | 1  |
| 16 | 233 | 234 | 2  |
| 17 | 251 | 265 | 15 |
| 18 | 316 | 325 | 10 |
| 19 | 358 | 358 | 1  |
| 20 | 360 | 370 | 11 |
| 21 | 375 | 392 | 18 |
| 22 | 407 | 416 | 10 |
| 23 | 426 | 429 | 4  |
| 24 | 432 | 450 | 19 |

# 258 positions (cumulative volume <= 10 Angstrom^3)

|    | start | end | length |
|----|-------|-----|--------|
| 1  | 1     | 22  | 22     |
| 2  | 29    | 42  | 14     |
| 3  | 44    | 80  | 37     |
| 4  | 86    | 87  | 2      |
| 5  | 89    | 107 | 19     |
| 6  | 109   | 130 | 22     |
| 7  | 133   | 142 | 10     |
| 8  | 144   | 145 | 2      |
| 9  | 147   | 166 | 20     |
| 10 | 173   | 181 | 9      |
| 11 | 211   | 216 | 6      |
| 12 | 225   | 225 | 1      |
| 13 | 227   | 227 | 1      |
| 14 | 231   | 231 | 1      |
| 15 | 233   | 234 | 2      |
| 16 | 251   | 265 | 15     |
| 17 | 316   | 325 | 10     |
| 18 | 358   | 358 | 1      |
| 19 | 360   | 370 | 11     |
| 20 | 375   | 392 | 18     |
| 21 | 407   | 416 | 10     |
| 22 | 426   | 429 | 4      |
| 23 | 431   | 450 | 20     |
| 24 | 452   | 452 | 1      |



Supplementary Text 2

# 264 positions (cumulative volume <= 11 Angstrom^3)

|    | start | end | length |
|----|-------|-----|--------|
| 1  | 1     | 22  | 22     |
| 2  | 27    | 27  | 1      |
| 3  | 29    | 42  | 14     |
| 4  | 44    | 80  | 37     |
| 5  | 86    | 87  | 2      |
| 6  | 89    | 107 | 19     |
| 7  | 109   | 130 | 22     |
| 8  | 132   | 142 | 11     |
| 9  | 144   | 145 | 2      |
| 10 | 147   | 167 | 21     |
| 11 | 173   | 181 | 9      |
| 12 | 211   | 216 | 6      |
| 13 | 224   | 227 | 4      |
| 14 | 231   | 231 | 1      |
| 15 | 233   | 234 | 2      |
| 16 | 251   | 265 | 15     |
| 17 | 316   | 325 | 10     |
| 18 | 358   | 370 | 13     |
| 19 | 375   | 392 | 18     |
| 20 | 407   | 416 | 10     |
| 21 | 426   | 429 | 4      |
| 22 | 431   | 450 | 20     |
| 23 | 452   | 452 | 1      |

# 269 positions (cumulative volume <= 12 Angstrom^3)

|    | start | end | length |
|----|-------|-----|--------|
| 1  | 1     | 22  | 22     |
| 2  | 27    | 27  | 1      |
| 3  | 29    | 42  | 14     |
| 4  | 44    | 80  | 37     |
| 5  | 86    | 87  | 2      |
| 6  | 89    | 107 | 19     |
| 7  | 109   | 142 | 34     |
| 8  | 144   | 145 | 2      |
| 9  | 147   | 167 | 21     |
| 10 | 173   | 181 | 9      |
| 11 | 211   | 216 | 6      |
| 12 | 224   | 227 | 4      |
| 13 | 231   | 231 | 1      |
| 14 | 233   | 234 | 2      |
| 15 | 251   | 266 | 16     |
| 16 | 303   | 303 | 1      |
| 17 | 316   | 325 | 10     |
| 18 | 356   | 356 | 1      |
| 19 | 358   | 370 | 13     |
| 20 | 375   | 392 | 18     |
| 21 | 407   | 416 | 10     |
| 22 | 426   | 429 | 4      |
| 23 | 431   | 450 | 20     |

Supplementary Text 2

```

24  452 453      2
# 274 positions (cumulative volume <= 13 Angstrom^3)
  start end length
1     1  22     22
2    27  27      1
3    29  80     52
4    84  84      1
5    86  87      2
6    89 107     19
7   109 142     34
8   144 145      2
9   147 167     21
10  173 181      9
11  211 216      6
12  224 227      4
13  230 231      2
14  233 234      2
15  251 266     16
16  303 303      1
17  305 305      1
18  316 325     10
19  355 356      2
20  358 370     13
21  375 392     18
22  407 416     10
23  426 429      4
24  431 450     20
25  452 453      2
# 278 positions (cumulative volume <= 14 Angstrom^3)
  start end length
1     1  22     22
2    27  27      1
3    29  80     52
4    84  84      1
5    86  87      2
6    89 142     54
7   144 145      2
8   147 167     21
9   172 181     10
10  211 216      6
11  224 227      4
12  230 231      2
13  233 234      2
14  251 266     16
15  268 268      1
16  303 303      1
17  305 305      1
18  316 325     10
19  355 356      2
20  358 370     13

```

Supplementary Text 2

|    |     |     |    |
|----|-----|-----|----|
| 21 | 375 | 392 | 18 |
| 22 | 407 | 416 | 10 |
| 23 | 424 | 424 | 1  |
| 24 | 426 | 429 | 4  |
| 25 | 431 | 450 | 20 |
| 26 | 452 | 453 | 2  |

# 283 positions (cumulative volume <= 15 Angstrom^3)

|    | start | end | length |
|----|-------|-----|--------|
| 1  | 1     | 23  | 23     |
| 2  | 27    | 27  | 1      |
| 3  | 29    | 80  | 52     |
| 4  | 84    | 84  | 1      |
| 5  | 86    | 87  | 2      |
| 6  | 89    | 142 | 54     |
| 7  | 144   | 167 | 24     |
| 8  | 172   | 181 | 10     |
| 9  | 211   | 216 | 6      |
| 10 | 224   | 227 | 4      |
| 11 | 230   | 234 | 5      |
| 12 | 251   | 266 | 16     |
| 13 | 268   | 268 | 1      |
| 14 | 303   | 303 | 1      |
| 15 | 305   | 305 | 1      |
| 16 | 316   | 325 | 10     |
| 17 | 355   | 356 | 2      |
| 18 | 358   | 370 | 13     |
| 19 | 375   | 392 | 18     |
| 20 | 407   | 416 | 10     |
| 21 | 424   | 424 | 1      |
| 22 | 426   | 453 | 28     |

# 287 positions (cumulative volume <= 16 Angstrom^3)

|    | start | end | length |
|----|-------|-----|--------|
| 1  | 1     | 23  | 23     |
| 2  | 27    | 80  | 54     |
| 3  | 84    | 84  | 1      |
| 4  | 86    | 87  | 2      |
| 5  | 89    | 142 | 54     |
| 6  | 144   | 167 | 24     |
| 7  | 172   | 181 | 10     |
| 8  | 210   | 216 | 7      |
| 9  | 224   | 227 | 4      |
| 10 | 230   | 234 | 5      |
| 11 | 251   | 266 | 16     |
| 12 | 268   | 268 | 1      |
| 13 | 303   | 303 | 1      |
| 14 | 305   | 305 | 1      |
| 15 | 316   | 325 | 10     |
| 16 | 354   | 356 | 3      |
| 17 | 358   | 370 | 13     |
| 18 | 375   | 392 | 18     |

Supplementary Text 2

```
19  406 416    11
20  424 424     1
21  426 453    28
# 291 positions (cumulative volume <= 17 Angstrom^3)
  start end length
1     1  23     23
2    27  81     55
3    84  84      1
4    86  87      2
5    89 142     54
6   144 168     25
7   172 181     10
8   183 183      1
9   210 216      7
10  224 227      4
11  230 234      5
12  251 266     16
13  268 268      1
14  303 303      1
15  305 305      1
16  316 325     10
17  354 370     17
18  375 392     18
19  406 416     11
20  424 424      1
21  426 453     28
# 294 positions (cumulative volume <= 18 Angstrom^3)
  start end length
1     1  23     23
2    27  81     55
3    84  87      4
4    89 142     54
5   144 168     25
6   172 181     10
7   183 183      1
8   210 216      7
9   224 227      4
10  230 234      5
11  251 266     16
12  268 268      1
13  302 303      2
14  305 305      1
15  316 325     10
16  353 370     18
17  375 392     18
18  406 416     11
19  424 424      1
20  426 453     28
# 297 positions (cumulative volume <= 19 Angstrom^3)
  start end length
```

Supplementary Text 2

|    |     |     |    |
|----|-----|-----|----|
| 1  | 1   | 23  | 23 |
| 2  | 27  | 82  | 56 |
| 3  | 84  | 87  | 4  |
| 4  | 89  | 142 | 54 |
| 5  | 144 | 168 | 25 |
| 6  | 172 | 181 | 10 |
| 7  | 183 | 183 | 1  |
| 8  | 210 | 216 | 7  |
| 9  | 224 | 227 | 4  |
| 10 | 230 | 234 | 5  |
| 11 | 251 | 266 | 16 |
| 12 | 268 | 268 | 1  |
| 13 | 302 | 303 | 2  |
| 14 | 305 | 306 | 2  |
| 15 | 316 | 325 | 10 |
| 16 | 353 | 371 | 19 |
| 17 | 375 | 392 | 18 |
| 18 | 406 | 416 | 11 |
| 19 | 424 | 424 | 1  |
| 20 | 426 | 453 | 28 |

# 301 positions (cumulative volume <= 20 Angstrom^3)

|    | start | end | length |
|----|-------|-----|--------|
| 1  | 1     | 23  | 23     |
| 2  | 27    | 87  | 61     |
| 3  | 89    | 142 | 54     |
| 4  | 144   | 168 | 25     |
| 5  | 171   | 181 | 11     |
| 6  | 183   | 183 | 1      |
| 7  | 210   | 216 | 7      |
| 8  | 224   | 228 | 5      |
| 9  | 230   | 234 | 5      |
| 10 | 251   | 266 | 16     |
| 11 | 268   | 268 | 1      |
| 12 | 302   | 303 | 2      |
| 13 | 305   | 306 | 2      |
| 14 | 316   | 325 | 10     |
| 15 | 353   | 371 | 19     |
| 16 | 375   | 392 | 18     |
| 17 | 406   | 416 | 11     |
| 18 | 424   | 424 | 1      |
| 19 | 426   | 454 | 29     |

# 304 positions (cumulative volume <= 21 Angstrom^3)

|   | start | end | length |
|---|-------|-----|--------|
| 1 | 1     | 23  | 23     |
| 2 | 27    | 87  | 61     |
| 3 | 89    | 142 | 54     |
| 4 | 144   | 168 | 25     |
| 5 | 171   | 181 | 11     |
| 6 | 183   | 183 | 1      |
| 7 | 210   | 216 | 7      |

Supplementary Text 2

|    |     |     |    |
|----|-----|-----|----|
| 8  | 224 | 234 | 11 |
| 9  | 251 | 266 | 16 |
| 10 | 268 | 268 | 1  |
| 11 | 302 | 306 | 5  |
| 12 | 316 | 325 | 10 |
| 13 | 353 | 371 | 19 |
| 14 | 375 | 392 | 18 |
| 15 | 406 | 416 | 11 |
| 16 | 424 | 454 | 31 |

# 306 positions (cumulative volume <= 22 Angstrom^3)

|    | start | end | length |
|----|-------|-----|--------|
| 1  | 1     | 23  | 23     |
| 2  | 27    | 87  | 61     |
| 3  | 89    | 142 | 54     |
| 4  | 144   | 168 | 25     |
| 5  | 171   | 181 | 11     |
| 6  | 183   | 183 | 1      |
| 7  | 210   | 216 | 7      |
| 8  | 224   | 234 | 11     |
| 9  | 251   | 269 | 19     |
| 10 | 302   | 306 | 5      |
| 11 | 316   | 325 | 10     |
| 12 | 353   | 371 | 19     |
| 13 | 375   | 392 | 18     |
| 14 | 406   | 416 | 11     |
| 15 | 424   | 454 | 31     |

# 310 positions (cumulative volume <= 23 Angstrom^3)

|    | start | end | length |
|----|-------|-----|--------|
| 1  | 1     | 23  | 23     |
| 2  | 27    | 87  | 61     |
| 3  | 89    | 142 | 54     |
| 4  | 144   | 168 | 25     |
| 5  | 171   | 181 | 11     |
| 6  | 183   | 185 | 3      |
| 7  | 210   | 216 | 7      |
| 8  | 224   | 234 | 11     |
| 9  | 236   | 237 | 2      |
| 10 | 251   | 269 | 19     |
| 11 | 302   | 306 | 5      |
| 12 | 316   | 325 | 10     |
| 13 | 353   | 371 | 19     |
| 14 | 375   | 392 | 18     |
| 15 | 406   | 416 | 11     |
| 16 | 424   | 454 | 31     |

# 312 positions (cumulative volume <= 24 Angstrom^3)

|   | start | end | length |
|---|-------|-----|--------|
| 1 | 1     | 23  | 23     |
| 2 | 27    | 87  | 61     |
| 3 | 89    | 168 | 80     |
| 4 | 171   | 181 | 11     |

Supplementary Text 2

|    |     |     |    |
|----|-----|-----|----|
| 5  | 183 | 185 | 3  |
| 6  | 210 | 216 | 7  |
| 7  | 224 | 234 | 11 |
| 8  | 236 | 237 | 2  |
| 9  | 239 | 239 | 1  |
| 10 | 251 | 269 | 19 |
| 11 | 302 | 306 | 5  |
| 12 | 316 | 325 | 10 |
| 13 | 353 | 371 | 19 |
| 14 | 375 | 392 | 18 |
| 15 | 406 | 416 | 11 |
| 16 | 424 | 454 | 31 |

# 314 positions (cumulative volume <= 25 Angstrom^3)

|    | start | end | length |
|----|-------|-----|--------|
| 1  | 1     | 23  | 23     |
| 2  | 27    | 87  | 61     |
| 3  | 89    | 169 | 81     |
| 4  | 171   | 181 | 11     |
| 5  | 183   | 185 | 3      |
| 6  | 210   | 216 | 7      |
| 7  | 224   | 237 | 14     |
| 8  | 239   | 239 | 1      |
| 9  | 251   | 269 | 19     |
| 10 | 302   | 306 | 5      |
| 11 | 316   | 325 | 10     |
| 12 | 353   | 371 | 19     |
| 13 | 375   | 392 | 18     |
| 14 | 406   | 416 | 11     |
| 15 | 424   | 454 | 31     |

# 316 positions (cumulative volume <= 26 Angstrom^3)

|    | start | end | length |
|----|-------|-----|--------|
| 1  | 1     | 23  | 23     |
| 2  | 26    | 87  | 62     |
| 3  | 89    | 169 | 81     |
| 4  | 171   | 185 | 15     |
| 5  | 210   | 216 | 7      |
| 6  | 224   | 237 | 14     |
| 7  | 239   | 239 | 1      |
| 8  | 251   | 269 | 19     |
| 9  | 302   | 306 | 5      |
| 10 | 316   | 325 | 10     |
| 11 | 353   | 371 | 19     |
| 12 | 375   | 392 | 18     |
| 13 | 406   | 416 | 11     |
| 14 | 424   | 454 | 31     |

# 318 positions (cumulative volume <= 27 Angstrom^3)

|   | start | end | length |
|---|-------|-----|--------|
| 1 | 1     | 87  | 87     |
| 2 | 89    | 169 | 81     |
| 3 | 171   | 185 | 15     |

Supplementary Text 2

|    |     |     |    |
|----|-----|-----|----|
| 4  | 210 | 216 | 7  |
| 5  | 224 | 237 | 14 |
| 6  | 239 | 239 | 1  |
| 7  | 251 | 269 | 19 |
| 8  | 302 | 306 | 5  |
| 9  | 316 | 325 | 10 |
| 10 | 353 | 371 | 19 |
| 11 | 375 | 392 | 18 |
| 12 | 406 | 416 | 11 |
| 13 | 424 | 454 | 31 |

# 320 positions (cumulative volume <= 28 Angstrom^3)

|    | start | end | length |
|----|-------|-----|--------|
| 1  | 1     | 87  | 87     |
| 2  | 89    | 169 | 81     |
| 3  | 171   | 185 | 15     |
| 4  | 210   | 216 | 7      |
| 5  | 224   | 237 | 14     |
| 6  | 239   | 239 | 1      |
| 7  | 251   | 269 | 19     |
| 8  | 302   | 307 | 6      |
| 9  | 316   | 325 | 10     |
| 10 | 353   | 372 | 20     |
| 11 | 375   | 392 | 18     |
| 12 | 406   | 416 | 11     |
| 13 | 424   | 454 | 31     |

# 322 positions (cumulative volume <= 29 Angstrom^3)

|    | start | end | length |
|----|-------|-----|--------|
| 1  | 1     | 87  | 87     |
| 2  | 89    | 185 | 97     |
| 3  | 209   | 216 | 8      |
| 4  | 224   | 237 | 14     |
| 5  | 239   | 239 | 1      |
| 6  | 251   | 269 | 19     |
| 7  | 302   | 307 | 6      |
| 8  | 316   | 325 | 10     |
| 9  | 353   | 372 | 20     |
| 10 | 375   | 392 | 18     |
| 11 | 406   | 416 | 11     |
| 12 | 424   | 454 | 31     |

# 323 positions (cumulative volume <= 30 Angstrom^3)

|   | start | end | length |
|---|-------|-----|--------|
| 1 | 1     | 87  | 87     |
| 2 | 89    | 185 | 97     |
| 3 | 209   | 216 | 8      |
| 4 | 224   | 237 | 14     |
| 5 | 239   | 239 | 1      |
| 6 | 251   | 269 | 19     |
| 7 | 302   | 307 | 6      |
| 8 | 314   | 314 | 1      |
| 9 | 316   | 325 | 10     |



Supplementary Text 2

|    |     |     |    |
|----|-----|-----|----|
| 10 | 353 | 372 | 20 |
| 11 | 375 | 392 | 18 |
| 12 | 406 | 416 | 11 |
| 13 | 424 | 454 | 31 |

# 325 positions (cumulative volume <= 31 Angstrom^3)

|    | start | end | length |
|----|-------|-----|--------|
| 1  | 1     | 87  | 87     |
| 2  | 89    | 185 | 97     |
| 3  | 209   | 216 | 8      |
| 4  | 224   | 239 | 16     |
| 5  | 243   | 243 | 1      |
| 6  | 251   | 269 | 19     |
| 7  | 302   | 307 | 6      |
| 8  | 314   | 314 | 1      |
| 9  | 316   | 325 | 10     |
| 10 | 353   | 372 | 20     |
| 11 | 375   | 392 | 18     |
| 12 | 406   | 416 | 11     |
| 13 | 424   | 454 | 31     |

# 326 positions (cumulative volume <= 32 Angstrom^3)

|    | start | end | length |
|----|-------|-----|--------|
| 1  | 1     | 87  | 87     |
| 2  | 89    | 185 | 97     |
| 3  | 208   | 216 | 9      |
| 4  | 224   | 239 | 16     |
| 5  | 243   | 243 | 1      |
| 6  | 251   | 269 | 19     |
| 7  | 302   | 307 | 6      |
| 8  | 314   | 314 | 1      |
| 9  | 316   | 325 | 10     |
| 10 | 353   | 372 | 20     |
| 11 | 375   | 392 | 18     |
| 12 | 406   | 416 | 11     |
| 13 | 424   | 454 | 31     |

# 327 positions (cumulative volume <= 33 Angstrom^3)

|    | start | end | length |
|----|-------|-----|--------|
| 1  | 1     | 87  | 87     |
| 2  | 89    | 185 | 97     |
| 3  | 208   | 216 | 9      |
| 4  | 224   | 239 | 16     |
| 5  | 243   | 243 | 1      |
| 6  | 250   | 269 | 20     |
| 7  | 302   | 307 | 6      |
| 8  | 314   | 314 | 1      |
| 9  | 316   | 325 | 10     |
| 10 | 353   | 372 | 20     |
| 11 | 375   | 392 | 18     |
| 12 | 406   | 416 | 11     |
| 13 | 424   | 454 | 31     |

# 328 positions (cumulative volume <= 34 Angstrom^3)

Supplementary Text 2

|    | start | end | length |
|----|-------|-----|--------|
| 1  | 1     | 87  | 87     |
| 2  | 89    | 185 | 97     |
| 3  | 208   | 216 | 9      |
| 4  | 224   | 239 | 16     |
| 5  | 243   | 243 | 1      |
| 6  | 250   | 269 | 20     |
| 7  | 302   | 307 | 6      |
| 8  | 314   | 325 | 12     |
| 9  | 353   | 372 | 20     |
| 10 | 375   | 392 | 18     |
| 11 | 406   | 416 | 11     |
| 12 | 424   | 454 | 31     |

# 329 positions (cumulative volume <= 35 Angstrom^3)

|    | start | end | length |
|----|-------|-----|--------|
| 1  | 1     | 87  | 87     |
| 2  | 89    | 185 | 97     |
| 3  | 208   | 216 | 9      |
| 4  | 224   | 239 | 16     |
| 5  | 243   | 244 | 2      |
| 6  | 250   | 269 | 20     |
| 7  | 302   | 307 | 6      |
| 8  | 314   | 325 | 12     |
| 9  | 353   | 372 | 20     |
| 10 | 375   | 392 | 18     |
| 11 | 406   | 416 | 11     |
| 12 | 424   | 454 | 31     |

# 330 positions (cumulative volume <= 36 Angstrom^3)

|    | start | end | length |
|----|-------|-----|--------|
| 1  | 1     | 87  | 87     |
| 2  | 89    | 185 | 97     |
| 3  | 208   | 216 | 9      |
| 4  | 224   | 239 | 16     |
| 5  | 243   | 244 | 2      |
| 6  | 250   | 269 | 20     |
| 7  | 301   | 307 | 7      |
| 8  | 314   | 325 | 12     |
| 9  | 353   | 372 | 20     |
| 10 | 375   | 392 | 18     |
| 11 | 406   | 416 | 11     |
| 12 | 424   | 454 | 31     |

# 331 positions (cumulative volume <= 37 Angstrom^3)

|   | start | end | length |
|---|-------|-----|--------|
| 1 | 1     | 87  | 87     |
| 2 | 89    | 185 | 97     |
| 3 | 208   | 216 | 9      |
| 4 | 224   | 240 | 17     |
| 5 | 243   | 244 | 2      |
| 6 | 250   | 269 | 20     |
| 7 | 301   | 307 | 7      |

Supplementary Text 2

```
8   314 325   12
9   353 372   20
10  375 392   18
11  406 416   11
12  424 454   31
# 331 positions (cumulative volume <= 38 Angstrom^3)
  start end length
1     1  87     87
2    89 185     97
3   208 216      9
4   224 240     17
5   243 244      2
6   250 269     20
7   301 307      7
8   314 325     12
9   353 372     20
10  375 392     18
11  406 416     11
12  424 454     31
# 332 positions (cumulative volume <= 39 Angstrom^3)
  start end length
1     1  87     87
2    89 185     97
3   208 216      9
4   224 241     18
5   243 244      2
6   250 269     20
7   301 307      7
8   314 325     12
9   353 372     20
10  375 392     18
11  406 416     11
12  424 454     31
# 333 positions (cumulative volume <= 40 Angstrom^3)
  start end length
1     1  87     87
2    89 185     97
3   208 216      9
4   224 244     21
5   250 269     20
6   301 307      7
7   314 325     12
8   353 372     20
9   375 392     18
10  406 416     11
11  424 454     31
# 333 positions (cumulative volume <= 41 Angstrom^3)
  start end length
1     1  87     87
2    89 185     97
```

Supplementary Text 2

|    |     |     |    |
|----|-----|-----|----|
| 3  | 208 | 216 | 9  |
| 4  | 224 | 244 | 21 |
| 5  | 250 | 269 | 20 |
| 6  | 301 | 307 | 7  |
| 7  | 314 | 325 | 12 |
| 8  | 353 | 372 | 20 |
| 9  | 375 | 392 | 18 |
| 10 | 406 | 416 | 11 |
| 11 | 424 | 454 | 31 |

# 334 positions (cumulative volume <= 42 Angstrom^3)

|    | start | end | length |
|----|-------|-----|--------|
| 1  | 1     | 87  | 87     |
| 2  | 89    | 185 | 97     |
| 3  | 203   | 203 | 1      |
| 4  | 208   | 216 | 9      |
| 5  | 224   | 244 | 21     |
| 6  | 250   | 269 | 20     |
| 7  | 301   | 307 | 7      |
| 8  | 314   | 325 | 12     |
| 9  | 353   | 372 | 20     |
| 10 | 375   | 392 | 18     |
| 11 | 406   | 416 | 11     |
| 12 | 424   | 454 | 31     |

# 335 positions (cumulative volume <= 43 Angstrom^3)

|    | start | end | length |
|----|-------|-----|--------|
| 1  | 1     | 87  | 87     |
| 2  | 89    | 185 | 97     |
| 3  | 203   | 203 | 1      |
| 4  | 208   | 216 | 9      |
| 5  | 224   | 244 | 21     |
| 6  | 250   | 270 | 21     |
| 7  | 301   | 307 | 7      |
| 8  | 314   | 325 | 12     |
| 9  | 353   | 372 | 20     |
| 10 | 375   | 392 | 18     |
| 11 | 406   | 416 | 11     |
| 12 | 424   | 454 | 31     |

# 335 positions (cumulative volume <= 44 Angstrom^3)

|    | start | end | length |
|----|-------|-----|--------|
| 1  | 1     | 87  | 87     |
| 2  | 89    | 185 | 97     |
| 3  | 203   | 203 | 1      |
| 4  | 208   | 216 | 9      |
| 5  | 224   | 244 | 21     |
| 6  | 250   | 270 | 21     |
| 7  | 301   | 307 | 7      |
| 8  | 314   | 325 | 12     |
| 9  | 353   | 372 | 20     |
| 10 | 375   | 392 | 18     |
| 11 | 406   | 416 | 11     |

Supplementary Text 2

```
12  424 454    31
# 336 positions (cumulative volume <= 45 Angstrom^3)
  start end length
1     1  87    87
2    89 185    97
3   203 203     1
4   208 216     9
5   224 244    21
6   250 270    21
7   301 307     7
8   314 325    12
9   353 372    20
10  375 392    18
11  406 416    11
12  423 454    32
# 336 positions (cumulative volume <= 46 Angstrom^3)
  start end length
1     1  87    87
2    89 185    97
3   203 203     1
4   208 216     9
5   224 244    21
6   250 270    21
7   301 307     7
8   314 325    12
9   353 372    20
10  375 392    18
11  406 416    11
12  423 454    32
# 337 positions (cumulative volume <= 47 Angstrom^3)
  start end length
1     1  87    87
2    89 185    97
3   203 203     1
4   208 216     9
5   224 244    21
6   250 270    21
7   283 283     1
8   301 307     7
9   314 325    12
10  353 372    20
11  375 392    18
12  406 416    11
13  423 454    32
# 337 positions (cumulative volume <= 48 Angstrom^3)
  start end length
1     1  87    87
2    89 185    97
3   203 203     1
4   208 216     9
```

Supplementary Text 2

|    |     |     |    |
|----|-----|-----|----|
| 5  | 224 | 244 | 21 |
| 6  | 250 | 270 | 21 |
| 7  | 283 | 283 | 1  |
| 8  | 301 | 307 | 7  |
| 9  | 314 | 325 | 12 |
| 10 | 353 | 372 | 20 |
| 11 | 375 | 392 | 18 |
| 12 | 406 | 416 | 11 |
| 13 | 423 | 454 | 32 |

# 337 positions (cumulative volume <= 49 Angstrom^3)

|    | start | end | length |
|----|-------|-----|--------|
| 1  | 1     | 87  | 87     |
| 2  | 89    | 185 | 97     |
| 3  | 203   | 203 | 1      |
| 4  | 208   | 216 | 9      |
| 5  | 224   | 244 | 21     |
| 6  | 250   | 270 | 21     |
| 7  | 283   | 283 | 1      |
| 8  | 301   | 307 | 7      |
| 9  | 314   | 325 | 12     |
| 10 | 353   | 372 | 20     |
| 11 | 375   | 392 | 18     |
| 12 | 406   | 416 | 11     |
| 13 | 423   | 454 | 32     |

# 338 positions (cumulative volume <= 50 Angstrom^3)

|    | start | end | length |
|----|-------|-----|--------|
| 1  | 1     | 87  | 87     |
| 2  | 89    | 185 | 97     |
| 3  | 202   | 203 | 2      |
| 4  | 208   | 216 | 9      |
| 5  | 224   | 244 | 21     |
| 6  | 250   | 270 | 21     |
| 7  | 283   | 283 | 1      |
| 8  | 301   | 307 | 7      |
| 9  | 314   | 325 | 12     |
| 10 | 353   | 372 | 20     |
| 11 | 375   | 392 | 18     |
| 12 | 406   | 416 | 11     |
| 13 | 423   | 454 | 32     |

# 338 positions (cumulative volume <= 51 Angstrom^3)

|   | start | end | length |
|---|-------|-----|--------|
| 1 | 1     | 87  | 87     |
| 2 | 89    | 185 | 97     |
| 3 | 202   | 203 | 2      |
| 4 | 208   | 216 | 9      |
| 5 | 224   | 244 | 21     |
| 6 | 250   | 270 | 21     |
| 7 | 283   | 283 | 1      |
| 8 | 301   | 307 | 7      |
| 9 | 314   | 325 | 12     |

Supplementary Text 2

|    |     |     |    |
|----|-----|-----|----|
| 10 | 353 | 372 | 20 |
| 11 | 375 | 392 | 18 |
| 12 | 406 | 416 | 11 |
| 13 | 423 | 454 | 32 |

# 339 positions (cumulative volume <= 52 Angstrom^3)

|    | start | end | length |
|----|-------|-----|--------|
| 1  | 1     | 87  | 87     |
| 2  | 89    | 185 | 97     |
| 3  | 202   | 203 | 2      |
| 4  | 208   | 216 | 9      |
| 5  | 224   | 245 | 22     |
| 6  | 250   | 270 | 21     |
| 7  | 283   | 283 | 1      |
| 8  | 301   | 307 | 7      |
| 9  | 314   | 325 | 12     |
| 10 | 353   | 372 | 20     |
| 11 | 375   | 392 | 18     |
| 12 | 406   | 416 | 11     |
| 13 | 423   | 454 | 32     |

# 339 positions (cumulative volume <= 53 Angstrom^3)

|    | start | end | length |
|----|-------|-----|--------|
| 1  | 1     | 87  | 87     |
| 2  | 89    | 185 | 97     |
| 3  | 202   | 203 | 2      |
| 4  | 208   | 216 | 9      |
| 5  | 224   | 245 | 22     |
| 6  | 250   | 270 | 21     |
| 7  | 283   | 283 | 1      |
| 8  | 301   | 307 | 7      |
| 9  | 314   | 325 | 12     |
| 10 | 353   | 372 | 20     |
| 11 | 375   | 392 | 18     |
| 12 | 406   | 416 | 11     |
| 13 | 423   | 454 | 32     |

# 339 positions (cumulative volume <= 54 Angstrom^3)

|    | start | end | length |
|----|-------|-----|--------|
| 1  | 1     | 87  | 87     |
| 2  | 89    | 185 | 97     |
| 3  | 202   | 203 | 2      |
| 4  | 208   | 216 | 9      |
| 5  | 224   | 245 | 22     |
| 6  | 250   | 270 | 21     |
| 7  | 283   | 283 | 1      |
| 8  | 301   | 307 | 7      |
| 9  | 314   | 325 | 12     |
| 10 | 353   | 372 | 20     |
| 11 | 375   | 392 | 18     |
| 12 | 406   | 416 | 11     |
| 13 | 423   | 454 | 32     |

# 340 positions (cumulative volume <= 55 Angstrom^3)

Supplementary Text 2

|    | start | end | length |
|----|-------|-----|--------|
| 1  | 1     | 87  | 87     |
| 2  | 89    | 185 | 97     |
| 3  | 202   | 203 | 2      |
| 4  | 208   | 216 | 9      |
| 5  | 224   | 245 | 22     |
| 6  | 250   | 270 | 21     |
| 7  | 283   | 284 | 2      |
| 8  | 301   | 307 | 7      |
| 9  | 314   | 325 | 12     |
| 10 | 353   | 372 | 20     |
| 11 | 375   | 392 | 18     |
| 12 | 406   | 416 | 11     |
| 13 | 423   | 454 | 32     |

# 340 positions (cumulative volume <= 56 Angstrom^3)

|    | start | end | length |
|----|-------|-----|--------|
| 1  | 1     | 87  | 87     |
| 2  | 89    | 185 | 97     |
| 3  | 202   | 203 | 2      |
| 4  | 208   | 216 | 9      |
| 5  | 224   | 245 | 22     |
| 6  | 250   | 270 | 21     |
| 7  | 283   | 284 | 2      |
| 8  | 301   | 307 | 7      |
| 9  | 314   | 325 | 12     |
| 10 | 353   | 372 | 20     |
| 11 | 375   | 392 | 18     |
| 12 | 406   | 416 | 11     |
| 13 | 423   | 454 | 32     |

# 341 positions (cumulative volume <= 57 Angstrom^3)

|    | start | end | length |
|----|-------|-----|--------|
| 1  | 1     | 87  | 87     |
| 2  | 89    | 185 | 97     |
| 3  | 202   | 203 | 2      |
| 4  | 208   | 216 | 9      |
| 5  | 224   | 245 | 22     |
| 6  | 249   | 270 | 22     |
| 7  | 283   | 284 | 2      |
| 8  | 301   | 307 | 7      |
| 9  | 314   | 325 | 12     |
| 10 | 353   | 372 | 20     |
| 11 | 375   | 392 | 18     |
| 12 | 406   | 416 | 11     |
| 13 | 423   | 454 | 32     |

# 341 positions (cumulative volume <= 58 Angstrom^3)

|   | start | end | length |
|---|-------|-----|--------|
| 1 | 1     | 87  | 87     |
| 2 | 89    | 185 | 97     |
| 3 | 202   | 203 | 2      |
| 4 | 208   | 216 | 9      |



Supplementary Text 2

|    |     |     |    |
|----|-----|-----|----|
| 5  | 224 | 245 | 22 |
| 6  | 249 | 270 | 22 |
| 7  | 283 | 284 | 2  |
| 8  | 301 | 307 | 7  |
| 9  | 314 | 325 | 12 |
| 10 | 353 | 372 | 20 |
| 11 | 375 | 392 | 18 |
| 12 | 406 | 416 | 11 |
| 13 | 423 | 454 | 32 |

# 341 positions (cumulative volume <= 59 Angstrom^3)

|    | start | end | length |
|----|-------|-----|--------|
| 1  | 1     | 87  | 87     |
| 2  | 89    | 185 | 97     |
| 3  | 202   | 203 | 2      |
| 4  | 208   | 216 | 9      |
| 5  | 224   | 245 | 22     |
| 6  | 249   | 270 | 22     |
| 7  | 283   | 284 | 2      |
| 8  | 301   | 307 | 7      |
| 9  | 314   | 325 | 12     |
| 10 | 353   | 372 | 20     |
| 11 | 375   | 392 | 18     |
| 12 | 406   | 416 | 11     |
| 13 | 423   | 454 | 32     |

# 342 positions (cumulative volume <= 60 Angstrom^3)

|    | start | end | length |
|----|-------|-----|--------|
| 1  | 1     | 87  | 87     |
| 2  | 89    | 185 | 97     |
| 3  | 202   | 203 | 2      |
| 4  | 208   | 216 | 9      |
| 5  | 224   | 245 | 22     |
| 6  | 249   | 270 | 22     |
| 7  | 282   | 284 | 3      |
| 8  | 301   | 307 | 7      |
| 9  | 314   | 325 | 12     |
| 10 | 353   | 372 | 20     |
| 11 | 375   | 392 | 18     |
| 12 | 406   | 416 | 11     |
| 13 | 423   | 454 | 32     |

# 342 positions (cumulative volume <= 61 Angstrom^3)

|   | start | end | length |
|---|-------|-----|--------|
| 1 | 1     | 87  | 87     |
| 2 | 89    | 185 | 97     |
| 3 | 202   | 203 | 2      |
| 4 | 208   | 216 | 9      |
| 5 | 224   | 245 | 22     |
| 6 | 249   | 270 | 22     |
| 7 | 282   | 284 | 3      |
| 8 | 301   | 307 | 7      |
| 9 | 314   | 325 | 12     |

Supplementary Text 2

|    |     |     |    |
|----|-----|-----|----|
| 10 | 353 | 372 | 20 |
| 11 | 375 | 392 | 18 |
| 12 | 406 | 416 | 11 |
| 13 | 423 | 454 | 32 |

# 343 positions (cumulative volume <= 62 Angstrom^3)

|    | start | end | length |
|----|-------|-----|--------|
| 1  | 1     | 87  | 87     |
| 2  | 89    | 185 | 97     |
| 3  | 202   | 203 | 2      |
| 4  | 208   | 216 | 9      |
| 5  | 224   | 246 | 23     |
| 6  | 249   | 270 | 22     |
| 7  | 282   | 284 | 3      |
| 8  | 301   | 307 | 7      |
| 9  | 314   | 325 | 12     |
| 10 | 353   | 372 | 20     |
| 11 | 375   | 392 | 18     |
| 12 | 406   | 416 | 11     |
| 13 | 423   | 454 | 32     |

# 343 positions (cumulative volume <= 63 Angstrom^3)

|    | start | end | length |
|----|-------|-----|--------|
| 1  | 1     | 87  | 87     |
| 2  | 89    | 185 | 97     |
| 3  | 202   | 203 | 2      |
| 4  | 208   | 216 | 9      |
| 5  | 224   | 246 | 23     |
| 6  | 249   | 270 | 22     |
| 7  | 282   | 284 | 3      |
| 8  | 301   | 307 | 7      |
| 9  | 314   | 325 | 12     |
| 10 | 353   | 372 | 20     |
| 11 | 375   | 392 | 18     |
| 12 | 406   | 416 | 11     |
| 13 | 423   | 454 | 32     |

# 343 positions (cumulative volume <= 64 Angstrom^3)

|    | start | end | length |
|----|-------|-----|--------|
| 1  | 1     | 87  | 87     |
| 2  | 89    | 185 | 97     |
| 3  | 202   | 203 | 2      |
| 4  | 208   | 216 | 9      |
| 5  | 224   | 246 | 23     |
| 6  | 249   | 270 | 22     |
| 7  | 282   | 284 | 3      |
| 8  | 301   | 307 | 7      |
| 9  | 314   | 325 | 12     |
| 10 | 353   | 372 | 20     |
| 11 | 375   | 392 | 18     |
| 12 | 406   | 416 | 11     |
| 13 | 423   | 454 | 32     |

# 344 positions (cumulative volume <= 65 Angstrom^3)

Supplementary Text 2

|    | start | end | length |
|----|-------|-----|--------|
| 1  | 1     | 87  | 87     |
| 2  | 89    | 185 | 97     |
| 3  | 202   | 203 | 2      |
| 4  | 206   | 206 | 1      |
| 5  | 208   | 216 | 9      |
| 6  | 224   | 246 | 23     |
| 7  | 249   | 270 | 22     |
| 8  | 282   | 284 | 3      |
| 9  | 301   | 307 | 7      |
| 10 | 314   | 325 | 12     |
| 11 | 353   | 372 | 20     |
| 12 | 375   | 392 | 18     |
| 13 | 406   | 416 | 11     |
| 14 | 423   | 454 | 32     |

# 344 positions (cumulative volume <= 66 Angstrom^3)

|    | start | end | length |
|----|-------|-----|--------|
| 1  | 1     | 87  | 87     |
| 2  | 89    | 185 | 97     |
| 3  | 202   | 203 | 2      |
| 4  | 206   | 206 | 1      |
| 5  | 208   | 216 | 9      |
| 6  | 224   | 246 | 23     |
| 7  | 249   | 270 | 22     |
| 8  | 282   | 284 | 3      |
| 9  | 301   | 307 | 7      |
| 10 | 314   | 325 | 12     |
| 11 | 353   | 372 | 20     |
| 12 | 375   | 392 | 18     |
| 13 | 406   | 416 | 11     |
| 14 | 423   | 454 | 32     |

# 344 positions (cumulative volume <= 67 Angstrom^3)

|    | start | end | length |
|----|-------|-----|--------|
| 1  | 1     | 87  | 87     |
| 2  | 89    | 185 | 97     |
| 3  | 202   | 203 | 2      |
| 4  | 206   | 206 | 1      |
| 5  | 208   | 216 | 9      |
| 6  | 224   | 246 | 23     |
| 7  | 249   | 270 | 22     |
| 8  | 282   | 284 | 3      |
| 9  | 301   | 307 | 7      |
| 10 | 314   | 325 | 12     |
| 11 | 353   | 372 | 20     |
| 12 | 375   | 392 | 18     |
| 13 | 406   | 416 | 11     |
| 14 | 423   | 454 | 32     |

# 345 positions (cumulative volume <= 68 Angstrom^3)

|   | start | end | length |
|---|-------|-----|--------|
| 1 | 1     | 87  | 87     |

Supplementary Text 2

|    |     |     |    |
|----|-----|-----|----|
| 2  | 89  | 185 | 97 |
| 3  | 197 | 197 | 1  |
| 4  | 202 | 203 | 2  |
| 5  | 206 | 206 | 1  |
| 6  | 208 | 216 | 9  |
| 7  | 224 | 246 | 23 |
| 8  | 249 | 270 | 22 |
| 9  | 282 | 284 | 3  |
| 10 | 301 | 307 | 7  |
| 11 | 314 | 325 | 12 |
| 12 | 353 | 372 | 20 |
| 13 | 375 | 392 | 18 |
| 14 | 406 | 416 | 11 |
| 15 | 423 | 454 | 32 |

# 345 positions (cumulative volume <= 69 Angstrom^3)

|    | start | end | length |
|----|-------|-----|--------|
| 1  | 1     | 87  | 87     |
| 2  | 89    | 185 | 97     |
| 3  | 197   | 197 | 1      |
| 4  | 202   | 203 | 2      |
| 5  | 206   | 206 | 1      |
| 6  | 208   | 216 | 9      |
| 7  | 224   | 246 | 23     |
| 8  | 249   | 270 | 22     |
| 9  | 282   | 284 | 3      |
| 10 | 301   | 307 | 7      |
| 11 | 314   | 325 | 12     |
| 12 | 353   | 372 | 20     |
| 13 | 375   | 392 | 18     |
| 14 | 406   | 416 | 11     |
| 15 | 423   | 454 | 32     |

# 345 positions (cumulative volume <= 70 Angstrom^3)

|    | start | end | length |
|----|-------|-----|--------|
| 1  | 1     | 87  | 87     |
| 2  | 89    | 185 | 97     |
| 3  | 197   | 197 | 1      |
| 4  | 202   | 203 | 2      |
| 5  | 206   | 206 | 1      |
| 6  | 208   | 216 | 9      |
| 7  | 224   | 246 | 23     |
| 8  | 249   | 270 | 22     |
| 9  | 282   | 284 | 3      |
| 10 | 301   | 307 | 7      |
| 11 | 314   | 325 | 12     |
| 12 | 353   | 372 | 20     |
| 13 | 375   | 392 | 18     |
| 14 | 406   | 416 | 11     |
| 15 | 423   | 454 | 32     |

# 345 positions (cumulative volume <= 71 Angstrom^3)

|  | start | end | length |
|--|-------|-----|--------|
|--|-------|-----|--------|

Supplementary Text 2

|    |     |     |    |
|----|-----|-----|----|
| 1  | 1   | 87  | 87 |
| 2  | 89  | 185 | 97 |
| 3  | 197 | 197 | 1  |
| 4  | 202 | 203 | 2  |
| 5  | 206 | 206 | 1  |
| 6  | 208 | 216 | 9  |
| 7  | 224 | 246 | 23 |
| 8  | 249 | 270 | 22 |
| 9  | 282 | 284 | 3  |
| 10 | 301 | 307 | 7  |
| 11 | 314 | 325 | 12 |
| 12 | 353 | 372 | 20 |
| 13 | 375 | 392 | 18 |
| 14 | 406 | 416 | 11 |
| 15 | 423 | 454 | 32 |

# 346 positions (cumulative volume <= 72 Angstrom^3)

|    | start | end | length |
|----|-------|-----|--------|
| 1  | 1     | 87  | 87     |
| 2  | 89    | 185 | 97     |
| 3  | 197   | 197 | 1      |
| 4  | 202   | 203 | 2      |
| 5  | 206   | 206 | 1      |
| 6  | 208   | 216 | 9      |
| 7  | 224   | 246 | 23     |
| 8  | 249   | 270 | 22     |
| 9  | 282   | 284 | 3      |
| 10 | 287   | 287 | 1      |
| 11 | 301   | 307 | 7      |
| 12 | 314   | 325 | 12     |
| 13 | 353   | 372 | 20     |
| 14 | 375   | 392 | 18     |
| 15 | 406   | 416 | 11     |
| 16 | 423   | 454 | 32     |

# 346 positions (cumulative volume <= 73 Angstrom^3)

|    | start | end | length |
|----|-------|-----|--------|
| 1  | 1     | 87  | 87     |
| 2  | 89    | 185 | 97     |
| 3  | 197   | 197 | 1      |
| 4  | 202   | 203 | 2      |
| 5  | 206   | 206 | 1      |
| 6  | 208   | 216 | 9      |
| 7  | 224   | 246 | 23     |
| 8  | 249   | 270 | 22     |
| 9  | 282   | 284 | 3      |
| 10 | 287   | 287 | 1      |
| 11 | 301   | 307 | 7      |
| 12 | 314   | 325 | 12     |
| 13 | 353   | 372 | 20     |
| 14 | 375   | 392 | 18     |
| 15 | 406   | 416 | 11     |

Supplementary Text 2

```
16  423 454    32
# 346 positions (cumulative volume <= 74 Angstrom^3)
  start end length
1     1  87     87
2    89 185     97
3   197 197      1
4   202 203      2
5   206 206      1
6   208 216      9
7   224 246     23
8   249 270     22
9   282 284      3
10  287 287      1
11  301 307      7
12  314 325     12
13  353 372     20
14  375 392     18
15  406 416     11
16  423 454     32
# 347 positions (cumulative volume <= 75 Angstrom^3)
  start end length
1     1  87     87
2    89 185     97
3   197 197      1
4   202 203      2
5   206 206      1
6   208 216      9
7   224 246     23
8   249 270     22
9   282 284      3
10  286 287      2
11  301 307      7
12  314 325     12
13  353 372     20
14  375 392     18
15  406 416     11
16  423 454     32
# 347 positions (cumulative volume <= 76 Angstrom^3)
  start end length
1     1  87     87
2    89 185     97
3   197 197      1
4   202 203      2
5   206 206      1
6   208 216      9
7   224 246     23
8   249 270     22
9   282 284      3
10  286 287      2
11  301 307      7
```

Supplementary Text 2

|    |     |     |    |
|----|-----|-----|----|
| 12 | 314 | 325 | 12 |
| 13 | 353 | 372 | 20 |
| 14 | 375 | 392 | 18 |
| 15 | 406 | 416 | 11 |
| 16 | 423 | 454 | 32 |

# 347 positions (cumulative volume <= 77 Angstrom^3)

|    | start | end | length |
|----|-------|-----|--------|
| 1  | 1     | 87  | 87     |
| 2  | 89    | 185 | 97     |
| 3  | 197   | 197 | 1      |
| 4  | 202   | 203 | 2      |
| 5  | 206   | 206 | 1      |
| 6  | 208   | 216 | 9      |
| 7  | 224   | 246 | 23     |
| 8  | 249   | 270 | 22     |
| 9  | 282   | 284 | 3      |
| 10 | 286   | 287 | 2      |
| 11 | 301   | 307 | 7      |
| 12 | 314   | 325 | 12     |
| 13 | 353   | 372 | 20     |
| 14 | 375   | 392 | 18     |
| 15 | 406   | 416 | 11     |
| 16 | 423   | 454 | 32     |

# 347 positions (cumulative volume <= 78 Angstrom^3)

|    | start | end | length |
|----|-------|-----|--------|
| 1  | 1     | 87  | 87     |
| 2  | 89    | 185 | 97     |
| 3  | 197   | 197 | 1      |
| 4  | 202   | 203 | 2      |
| 5  | 206   | 206 | 1      |
| 6  | 208   | 216 | 9      |
| 7  | 224   | 246 | 23     |
| 8  | 249   | 270 | 22     |
| 9  | 282   | 284 | 3      |
| 10 | 286   | 287 | 2      |
| 11 | 301   | 307 | 7      |
| 12 | 314   | 325 | 12     |
| 13 | 353   | 372 | 20     |
| 14 | 375   | 392 | 18     |
| 15 | 406   | 416 | 11     |
| 16 | 423   | 454 | 32     |

# 348 positions (cumulative volume <= 79 Angstrom^3)

|   | start | end | length |
|---|-------|-----|--------|
| 1 | 1     | 87  | 87     |
| 2 | 89    | 185 | 97     |
| 3 | 197   | 197 | 1      |
| 4 | 202   | 203 | 2      |
| 5 | 206   | 206 | 1      |
| 6 | 208   | 216 | 9      |
| 7 | 224   | 246 | 23     |

Supplementary Text 2

|    |     |     |    |
|----|-----|-----|----|
| 8  | 249 | 270 | 22 |
| 9  | 282 | 287 | 6  |
| 10 | 301 | 307 | 7  |
| 11 | 314 | 325 | 12 |
| 12 | 353 | 372 | 20 |
| 13 | 375 | 392 | 18 |
| 14 | 406 | 416 | 11 |
| 15 | 423 | 454 | 32 |

# 348 positions (cumulative volume <= 80 Angstrom^3)

|    | start | end | length |
|----|-------|-----|--------|
| 1  | 1     | 87  | 87     |
| 2  | 89    | 185 | 97     |
| 3  | 197   | 197 | 1      |
| 4  | 202   | 203 | 2      |
| 5  | 206   | 206 | 1      |
| 6  | 208   | 216 | 9      |
| 7  | 224   | 246 | 23     |
| 8  | 249   | 270 | 22     |
| 9  | 282   | 287 | 6      |
| 10 | 301   | 307 | 7      |
| 11 | 314   | 325 | 12     |
| 12 | 353   | 372 | 20     |
| 13 | 375   | 392 | 18     |
| 14 | 406   | 416 | 11     |
| 15 | 423   | 454 | 32     |

# 348 positions (cumulative volume <= 81 Angstrom^3)

|    | start | end | length |
|----|-------|-----|--------|
| 1  | 1     | 87  | 87     |
| 2  | 89    | 185 | 97     |
| 3  | 197   | 197 | 1      |
| 4  | 202   | 203 | 2      |
| 5  | 206   | 206 | 1      |
| 6  | 208   | 216 | 9      |
| 7  | 224   | 246 | 23     |
| 8  | 249   | 270 | 22     |
| 9  | 282   | 287 | 6      |
| 10 | 301   | 307 | 7      |
| 11 | 314   | 325 | 12     |
| 12 | 353   | 372 | 20     |
| 13 | 375   | 392 | 18     |
| 14 | 406   | 416 | 11     |
| 15 | 423   | 454 | 32     |

# 348 positions (cumulative volume <= 82 Angstrom^3)

|   | start | end | length |
|---|-------|-----|--------|
| 1 | 1     | 87  | 87     |
| 2 | 89    | 185 | 97     |
| 3 | 197   | 197 | 1      |
| 4 | 202   | 203 | 2      |
| 5 | 206   | 206 | 1      |
| 6 | 208   | 216 | 9      |



Supplementary Text 2

|    |     |     |    |
|----|-----|-----|----|
| 7  | 224 | 246 | 23 |
| 8  | 249 | 270 | 22 |
| 9  | 282 | 287 | 6  |
| 10 | 301 | 307 | 7  |
| 11 | 314 | 325 | 12 |
| 12 | 353 | 372 | 20 |
| 13 | 375 | 392 | 18 |
| 14 | 406 | 416 | 11 |
| 15 | 423 | 454 | 32 |

# 349 positions (cumulative volume <= 83 Angstrom^3)

|    | start | end | length |
|----|-------|-----|--------|
| 1  | 1     | 87  | 87     |
| 2  | 89    | 185 | 97     |
| 3  | 197   | 197 | 1      |
| 4  | 202   | 203 | 2      |
| 5  | 205   | 206 | 2      |
| 6  | 208   | 216 | 9      |
| 7  | 224   | 246 | 23     |
| 8  | 249   | 270 | 22     |
| 9  | 282   | 287 | 6      |
| 10 | 301   | 307 | 7      |
| 11 | 314   | 325 | 12     |
| 12 | 353   | 372 | 20     |
| 13 | 375   | 392 | 18     |
| 14 | 406   | 416 | 11     |
| 15 | 423   | 454 | 32     |

# 349 positions (cumulative volume <= 84 Angstrom^3)

|    | start | end | length |
|----|-------|-----|--------|
| 1  | 1     | 87  | 87     |
| 2  | 89    | 185 | 97     |
| 3  | 197   | 197 | 1      |
| 4  | 202   | 203 | 2      |
| 5  | 205   | 206 | 2      |
| 6  | 208   | 216 | 9      |
| 7  | 224   | 246 | 23     |
| 8  | 249   | 270 | 22     |
| 9  | 282   | 287 | 6      |
| 10 | 301   | 307 | 7      |
| 11 | 314   | 325 | 12     |
| 12 | 353   | 372 | 20     |
| 13 | 375   | 392 | 18     |
| 14 | 406   | 416 | 11     |
| 15 | 423   | 454 | 32     |

# 349 positions (cumulative volume <= 85 Angstrom^3)

|   | start | end | length |
|---|-------|-----|--------|
| 1 | 1     | 87  | 87     |
| 2 | 89    | 185 | 97     |
| 3 | 197   | 197 | 1      |
| 4 | 202   | 203 | 2      |
| 5 | 205   | 206 | 2      |

Supplementary Text 2

|    |     |     |    |
|----|-----|-----|----|
| 6  | 208 | 216 | 9  |
| 7  | 224 | 246 | 23 |
| 8  | 249 | 270 | 22 |
| 9  | 282 | 287 | 6  |
| 10 | 301 | 307 | 7  |
| 11 | 314 | 325 | 12 |
| 12 | 353 | 372 | 20 |
| 13 | 375 | 392 | 18 |
| 14 | 406 | 416 | 11 |
| 15 | 423 | 454 | 32 |

# 350 positions (cumulative volume <= 86 Angstrom^3)

|    | start | end | length |
|----|-------|-----|--------|
| 1  | 1     | 87  | 87     |
| 2  | 89    | 185 | 97     |
| 3  | 197   | 197 | 1      |
| 4  | 202   | 206 | 5      |
| 5  | 208   | 216 | 9      |
| 6  | 224   | 246 | 23     |
| 7  | 249   | 270 | 22     |
| 8  | 282   | 287 | 6      |
| 9  | 301   | 307 | 7      |
| 10 | 314   | 325 | 12     |
| 11 | 353   | 372 | 20     |
| 12 | 375   | 392 | 18     |
| 13 | 406   | 416 | 11     |
| 14 | 423   | 454 | 32     |

# 350 positions (cumulative volume <= 87 Angstrom^3)

|    | start | end | length |
|----|-------|-----|--------|
| 1  | 1     | 87  | 87     |
| 2  | 89    | 185 | 97     |
| 3  | 197   | 197 | 1      |
| 4  | 202   | 206 | 5      |
| 5  | 208   | 216 | 9      |
| 6  | 224   | 246 | 23     |
| 7  | 249   | 270 | 22     |
| 8  | 282   | 287 | 6      |
| 9  | 301   | 307 | 7      |
| 10 | 314   | 325 | 12     |
| 11 | 353   | 372 | 20     |
| 12 | 375   | 392 | 18     |
| 13 | 406   | 416 | 11     |
| 14 | 423   | 454 | 32     |

# 350 positions (cumulative volume <= 88 Angstrom^3)

|   | start | end | length |
|---|-------|-----|--------|
| 1 | 1     | 87  | 87     |
| 2 | 89    | 185 | 97     |
| 3 | 197   | 197 | 1      |
| 4 | 202   | 206 | 5      |
| 5 | 208   | 216 | 9      |
| 6 | 224   | 246 | 23     |

Supplementary Text 2

|    |     |     |    |
|----|-----|-----|----|
| 7  | 249 | 270 | 22 |
| 8  | 282 | 287 | 6  |
| 9  | 301 | 307 | 7  |
| 10 | 314 | 325 | 12 |
| 11 | 353 | 372 | 20 |
| 12 | 375 | 392 | 18 |
| 13 | 406 | 416 | 11 |
| 14 | 423 | 454 | 32 |

# 350 positions (cumulative volume <= 89 Angstrom^3)

|    | start | end | length |
|----|-------|-----|--------|
| 1  | 1     | 87  | 87     |
| 2  | 89    | 185 | 97     |
| 3  | 197   | 197 | 1      |
| 4  | 202   | 206 | 5      |
| 5  | 208   | 216 | 9      |
| 6  | 224   | 246 | 23     |
| 7  | 249   | 270 | 22     |
| 8  | 282   | 287 | 6      |
| 9  | 301   | 307 | 7      |
| 10 | 314   | 325 | 12     |
| 11 | 353   | 372 | 20     |
| 12 | 375   | 392 | 18     |
| 13 | 406   | 416 | 11     |
| 14 | 423   | 454 | 32     |

# 351 positions (cumulative volume <= 90 Angstrom^3)

|    | start | end | length |
|----|-------|-----|--------|
| 1  | 1     | 87  | 87     |
| 2  | 89    | 185 | 97     |
| 3  | 197   | 197 | 1      |
| 4  | 202   | 206 | 5      |
| 5  | 208   | 216 | 9      |
| 6  | 224   | 246 | 23     |
| 7  | 249   | 270 | 22     |
| 8  | 282   | 287 | 6      |
| 9  | 300   | 307 | 8      |
| 10 | 314   | 325 | 12     |
| 11 | 353   | 372 | 20     |
| 12 | 375   | 392 | 18     |
| 13 | 406   | 416 | 11     |
| 14 | 423   | 454 | 32     |

# 351 positions (cumulative volume <= 91 Angstrom^3)

|   | start | end | length |
|---|-------|-----|--------|
| 1 | 1     | 87  | 87     |
| 2 | 89    | 185 | 97     |
| 3 | 197   | 197 | 1      |
| 4 | 202   | 206 | 5      |
| 5 | 208   | 216 | 9      |
| 6 | 224   | 246 | 23     |
| 7 | 249   | 270 | 22     |
| 8 | 282   | 287 | 6      |

Supplementary Text 2

```
9    300 307    8
10   314 325   12
11   353 372   20
12   375 392   18
13   406 416   11
14   423 454   32
# 351 positions (cumulative volume <= 92 Angstrom^3)
  start end length
1     1  87    87
2    89 185    97
3   197 197     1
4   202 206     5
5   208 216     9
6   224 246    23
7   249 270    22
8   282 287     6
9   300 307     8
10  314 325    12
11  353 372    20
12  375 392    18
13  406 416    11
14  423 454    32
# 352 positions (cumulative volume <= 93 Angstrom^3)
  start end length
1     1  87    87
2    89 185    97
3   197 198     2
4   202 206     5
5   208 216     9
6   224 246    23
7   249 270    22
8   282 287     6
9   300 307     8
10  314 325    12
11  353 372    20
12  375 392    18
13  406 416    11
14  423 454    32
# 352 positions (cumulative volume <= 94 Angstrom^3)
  start end length
1     1  87    87
2    89 185    97
3   197 198     2
4   202 206     5
5   208 216     9
6   224 246    23
7   249 270    22
8   282 287     6
9   300 307     8
10  314 325    12
```

Supplementary Text 2

|    |     |     |    |
|----|-----|-----|----|
| 11 | 353 | 372 | 20 |
| 12 | 375 | 392 | 18 |
| 13 | 406 | 416 | 11 |
| 14 | 423 | 454 | 32 |

# 352 positions (cumulative volume <= 95 Angstrom^3)

|    | start | end | length |
|----|-------|-----|--------|
| 1  | 1     | 87  | 87     |
| 2  | 89    | 185 | 97     |
| 3  | 197   | 198 | 2      |
| 4  | 202   | 206 | 5      |
| 5  | 208   | 216 | 9      |
| 6  | 224   | 246 | 23     |
| 7  | 249   | 270 | 22     |
| 8  | 282   | 287 | 6      |
| 9  | 300   | 307 | 8      |
| 10 | 314   | 325 | 12     |
| 11 | 353   | 372 | 20     |
| 12 | 375   | 392 | 18     |
| 13 | 406   | 416 | 11     |
| 14 | 423   | 454 | 32     |

# 352 positions (cumulative volume <= 96 Angstrom^3)

|    | start | end | length |
|----|-------|-----|--------|
| 1  | 1     | 87  | 87     |
| 2  | 89    | 185 | 97     |
| 3  | 197   | 198 | 2      |
| 4  | 202   | 206 | 5      |
| 5  | 208   | 216 | 9      |
| 6  | 224   | 246 | 23     |
| 7  | 249   | 270 | 22     |
| 8  | 282   | 287 | 6      |
| 9  | 300   | 307 | 8      |
| 10 | 314   | 325 | 12     |
| 11 | 353   | 372 | 20     |
| 12 | 375   | 392 | 18     |
| 13 | 406   | 416 | 11     |
| 14 | 423   | 454 | 32     |

# 352 positions (cumulative volume <= 97 Angstrom^3)

|    | start | end | length |
|----|-------|-----|--------|
| 1  | 1     | 87  | 87     |
| 2  | 89    | 185 | 97     |
| 3  | 197   | 198 | 2      |
| 4  | 202   | 206 | 5      |
| 5  | 208   | 216 | 9      |
| 6  | 224   | 246 | 23     |
| 7  | 249   | 270 | 22     |
| 8  | 282   | 287 | 6      |
| 9  | 300   | 307 | 8      |
| 10 | 314   | 325 | 12     |
| 11 | 353   | 372 | 20     |
| 12 | 375   | 392 | 18     |

Supplementary Text 2

```

13  406 416    11
14  423 454    32
# 353 positions (cumulative volume <= 98 Angstrom^3)
  start end length
1     1  87     87
2    89 185     97
3   197 198      2
4   202 206      5
5   208 216      9
6   224 246     23
7   249 270     22
8   281 287      7
9   300 307      8
10  314 325     12
11  353 372     20
12  375 392     18
13  406 416     11
14  423 454     32
# 353 positions (cumulative volume <= 99 Angstrom^3)
  start end length
1     1  87     87
2    89 185     97
3   197 198      2
4   202 206      5
5   208 216      9
6   224 246     23
7   249 270     22
8   281 287      7
9   300 307      8
10  314 325     12
11  353 372     20
12  375 392     18
13  406 416     11
14  423 454     32
# 353 positions (cumulative volume <= 100 Angstrom^3)
  start end length
1     1  87     87
2    89 185     97
3   197 198      2
4   202 206      5
5   208 216      9
6   224 246     23
7   249 270     22
8   281 287      7
9   300 307      8
10  314 325     12
11  353 372     20
12  375 392     18
13  406 416     11
14  423 454     32

```

## Supplementary Text 2

### CORE DATA FOR CHARACTERIZED AND PUTATIVE CLASS C ENZYMES (n=42)

|                      |                |
|----------------------|----------------|
| core size 446 of 447 | vol = 14432.33 |
| core size 445 of 447 | vol = 13781.53 |
| core size 444 of 447 | vol = 13158.23 |
| core size 443 of 447 | vol = 12531.02 |
| core size 442 of 447 | vol = 11917.36 |
| core size 441 of 447 | vol = 11312.84 |
| core size 440 of 447 | vol = 10709.75 |
| core size 439 of 447 | vol = 9952.836 |
| core size 438 of 447 | vol = 9213.775 |
| core size 437 of 447 | vol = 8643.713 |
| core size 436 of 447 | vol = 8206.064 |
| core size 435 of 447 | vol = 7687     |
| core size 434 of 447 | vol = 7293.285 |
| core size 433 of 447 | vol = 6870.334 |
| core size 432 of 447 | vol = 6416.77  |
| core size 431 of 447 | vol = 5987.272 |
| core size 430 of 447 | vol = 5505.611 |
| core size 429 of 447 | vol = 5093.883 |
| core size 428 of 447 | vol = 4631.803 |
| core size 427 of 447 | vol = 4288.073 |
| core size 426 of 447 | vol = 3939.761 |
| core size 425 of 447 | vol = 3589.911 |
| core size 424 of 447 | vol = 3188.872 |
| core size 423 of 447 | vol = 2776.266 |
| core size 422 of 447 | vol = 2426.599 |
| core size 421 of 447 | vol = 2057.42  |
| core size 420 of 447 | vol = 1761.787 |
| core size 419 of 447 | vol = 1448.129 |
| core size 418 of 447 | vol = 1135.486 |
| core size 417 of 447 | vol = 850.328  |
| core size 416 of 447 | vol = 593.62   |
| core size 415 of 447 | vol = 334.367  |
| core size 414 of 447 | vol = 136.174  |
| core size 413 of 447 | vol = 117.403  |
| core size 412 of 447 | vol = 107.879  |
| core size 411 of 447 | vol = 99.885   |
| core size 410 of 447 | vol = 93.696   |
| core size 409 of 447 | vol = 87.854   |
| core size 408 of 447 | vol = 82.253   |
| core size 407 of 447 | vol = 76.873   |
| core size 406 of 447 | vol = 72.026   |
| core size 405 of 447 | vol = 68.566   |
| core size 404 of 447 | vol = 64.275   |
| core size 403 of 447 | vol = 60.985   |
| core size 402 of 447 | vol = 56.944   |

Supplementary Text 2

|                      |              |
|----------------------|--------------|
| core size 401 of 447 | vol = 53.455 |
| core size 400 of 447 | vol = 50.434 |
| core size 399 of 447 | vol = 48.158 |
| core size 398 of 447 | vol = 45.909 |
| core size 397 of 447 | vol = 43.588 |
| core size 396 of 447 | vol = 40.916 |
| core size 395 of 447 | vol = 38.876 |
| core size 394 of 447 | vol = 37.046 |
| core size 393 of 447 | vol = 35.378 |
| core size 392 of 447 | vol = 33.917 |
| core size 391 of 447 | vol = 32.592 |
| core size 390 of 447 | vol = 31.478 |
| core size 389 of 447 | vol = 30.342 |
| core size 388 of 447 | vol = 29.241 |
| core size 387 of 447 | vol = 28.364 |
| core size 386 of 447 | vol = 27.505 |
| core size 385 of 447 | vol = 26.764 |
| core size 384 of 447 | vol = 26.08  |
| core size 383 of 447 | vol = 25.397 |
| core size 382 of 447 | vol = 24.82  |
| core size 381 of 447 | vol = 24.261 |
| core size 380 of 447 | vol = 23.714 |
| core size 379 of 447 | vol = 23.174 |
| core size 378 of 447 | vol = 22.631 |
| core size 377 of 447 | vol = 22.089 |
| core size 376 of 447 | vol = 21.671 |
| core size 375 of 447 | vol = 21.201 |
| core size 374 of 447 | vol = 20.745 |
| core size 373 of 447 | vol = 20.295 |
| core size 372 of 447 | vol = 19.893 |
| core size 371 of 447 | vol = 19.459 |
| core size 370 of 447 | vol = 19.014 |
| core size 369 of 447 | vol = 18.601 |
| core size 368 of 447 | vol = 18.218 |
| core size 367 of 447 | vol = 17.86  |
| core size 366 of 447 | vol = 17.474 |
| core size 365 of 447 | vol = 17.137 |
| core size 364 of 447 | vol = 16.78  |
| core size 363 of 447 | vol = 16.416 |
| core size 362 of 447 | vol = 16.097 |
| core size 361 of 447 | vol = 15.789 |
| core size 360 of 447 | vol = 15.515 |
| core size 359 of 447 | vol = 15.224 |
| core size 358 of 447 | vol = 14.915 |
| core size 357 of 447 | vol = 14.61  |
| core size 356 of 447 | vol = 14.328 |
| core size 355 of 447 | vol = 14.026 |
| core size 354 of 447 | vol = 13.769 |
| core size 353 of 447 | vol = 13.534 |
| core size 352 of 447 | vol = 13.287 |



Supplementary Text 2

core size 351 of 447 vol = 13.061  
core size 350 of 447 vol = 12.869  
core size 349 of 447 vol = 12.671  
core size 348 of 447 vol = 12.472  
core size 347 of 447 vol = 12.264  
core size 346 of 447 vol = 12.044  
core size 345 of 447 vol = 11.861  
core size 344 of 447 vol = 11.685  
core size 343 of 447 vol = 11.384  
core size 342 of 447 vol = 11.159  
core size 341 of 447 vol = 10.987  
core size 340 of 447 vol = 10.824  
core size 339 of 447 vol = 10.654  
core size 338 of 447 vol = 10.511  
core size 337 of 447 vol = 10.358  
core size 336 of 447 vol = 10.042  
core size 335 of 447 vol = 9.865  
core size 334 of 447 vol = 9.728  
core size 333 of 447 vol = 9.572  
core size 332 of 447 vol = 9.438  
core size 331 of 447 vol = 9.335  
core size 330 of 447 vol = 9.22  
core size 329 of 447 vol = 9.085  
core size 328 of 447 vol = 8.949  
core size 327 of 447 vol = 8.832  
core size 326 of 447 vol = 8.714  
core size 325 of 447 vol = 8.604  
core size 324 of 447 vol = 8.488  
core size 323 of 447 vol = 8.328  
core size 322 of 447 vol = 8.222  
core size 321 of 447 vol = 8.101  
core size 320 of 447 vol = 8.014  
core size 319 of 447 vol = 7.85  
core size 318 of 447 vol = 7.722  
core size 317 of 447 vol = 7.637  
core size 316 of 447 vol = 7.561  
core size 315 of 447 vol = 7.465  
core size 314 of 447 vol = 7.269  
core size 313 of 447 vol = 7.193  
core size 312 of 447 vol = 7.084  
core size 311 of 447 vol = 6.999  
core size 310 of 447 vol = 6.893  
core size 309 of 447 vol = 6.798  
core size 308 of 447 vol = 6.703  
core size 307 of 447 vol = 6.59  
core size 306 of 447 vol = 6.479  
core size 305 of 447 vol = 6.402  
core size 304 of 447 vol = 6.325  
core size 303 of 447 vol = 6.238  
core size 302 of 447 vol = 6.128

Supplementary Text 2

core size 301 of 447 vol = 6.081  
core size 300 of 447 vol = 5.994  
core size 299 of 447 vol = 5.921  
core size 298 of 447 vol = 5.839  
core size 297 of 447 vol = 5.761  
core size 296 of 447 vol = 5.657  
core size 295 of 447 vol = 5.603  
core size 294 of 447 vol = 5.54  
core size 293 of 447 vol = 5.461  
core size 292 of 447 vol = 5.372  
core size 291 of 447 vol = 5.285  
core size 290 of 447 vol = 5.202  
core size 289 of 447 vol = 5.131  
core size 288 of 447 vol = 5.056  
core size 287 of 447 vol = 4.998  
core size 286 of 447 vol = 4.923  
core size 285 of 447 vol = 4.868  
core size 284 of 447 vol = 4.798  
core size 283 of 447 vol = 4.729  
core size 282 of 447 vol = 4.673  
core size 281 of 447 vol = 4.623  
core size 280 of 447 vol = 4.548  
core size 279 of 447 vol = 4.491  
core size 278 of 447 vol = 4.424  
core size 277 of 447 vol = 4.351  
core size 276 of 447 vol = 4.282  
core size 275 of 447 vol = 4.216  
core size 274 of 447 vol = 4.14  
core size 273 of 447 vol = 4.072  
core size 272 of 447 vol = 4.013  
core size 271 of 447 vol = 3.972  
core size 270 of 447 vol = 3.934  
core size 269 of 447 vol = 3.894  
core size 268 of 447 vol = 3.832  
core size 267 of 447 vol = 3.792  
core size 266 of 447 vol = 3.746  
core size 265 of 447 vol = 3.711  
core size 264 of 447 vol = 3.653  
core size 263 of 447 vol = 3.613  
core size 262 of 447 vol = 3.578  
core size 261 of 447 vol = 3.52  
core size 260 of 447 vol = 3.461  
core size 259 of 447 vol = 3.367  
core size 258 of 447 vol = 3.264  
core size 257 of 447 vol = 3.212  
core size 256 of 447 vol = 3.156  
core size 255 of 447 vol = 3.109  
core size 254 of 447 vol = 3.082  
core size 253 of 447 vol = 3.02  
core size 252 of 447 vol = 2.972

Supplementary Text 2

core size 251 of 447 vol = 2.928  
core size 250 of 447 vol = 2.892  
core size 249 of 447 vol = 2.853  
core size 248 of 447 vol = 2.797  
core size 247 of 447 vol = 2.717  
core size 246 of 447 vol = 2.68  
core size 245 of 447 vol = 2.641  
core size 244 of 447 vol = 2.588  
core size 243 of 447 vol = 2.546  
core size 242 of 447 vol = 2.512  
core size 241 of 447 vol = 2.461  
core size 240 of 447 vol = 2.431  
core size 239 of 447 vol = 2.39  
core size 238 of 447 vol = 2.349  
core size 237 of 447 vol = 2.322  
core size 236 of 447 vol = 2.296  
core size 235 of 447 vol = 2.27  
core size 234 of 447 vol = 2.238  
core size 233 of 447 vol = 2.186  
core size 232 of 447 vol = 2.131  
core size 231 of 447 vol = 2.094  
core size 230 of 447 vol = 2.065  
core size 229 of 447 vol = 2.034  
core size 228 of 447 vol = 2.016  
core size 227 of 447 vol = 1.994  
core size 226 of 447 vol = 1.948  
core size 225 of 447 vol = 1.926  
core size 224 of 447 vol = 1.891  
core size 223 of 447 vol = 1.857  
core size 222 of 447 vol = 1.842  
core size 221 of 447 vol = 1.821  
core size 220 of 447 vol = 1.794  
core size 219 of 447 vol = 1.772  
core size 218 of 447 vol = 1.739  
core size 217 of 447 vol = 1.694  
core size 216 of 447 vol = 1.664  
core size 215 of 447 vol = 1.65  
core size 214 of 447 vol = 1.621  
core size 213 of 447 vol = 1.598  
core size 212 of 447 vol = 1.583  
core size 211 of 447 vol = 1.569  
core size 210 of 447 vol = 1.538  
core size 209 of 447 vol = 1.513  
core size 208 of 447 vol = 1.489  
core size 207 of 447 vol = 1.468  
core size 206 of 447 vol = 1.465  
core size 205 of 447 vol = 1.447  
core size 204 of 447 vol = 1.429  
core size 203 of 447 vol = 1.413  
core size 202 of 447 vol = 1.401

Supplementary Text 2

core size 201 of 447 vol = 1.386  
core size 200 of 447 vol = 1.359  
core size 199 of 447 vol = 1.338  
core size 198 of 447 vol = 1.31  
core size 197 of 447 vol = 1.306  
core size 196 of 447 vol = 1.285  
core size 195 of 447 vol = 1.25  
core size 194 of 447 vol = 1.227  
core size 193 of 447 vol = 1.208  
core size 192 of 447 vol = 1.193  
core size 191 of 447 vol = 1.177  
core size 190 of 447 vol = 1.15  
core size 189 of 447 vol = 1.132  
core size 188 of 447 vol = 1.115  
core size 187 of 447 vol = 1.11  
core size 186 of 447 vol = 1.099  
core size 185 of 447 vol = 1.081  
core size 184 of 447 vol = 1.072  
core size 183 of 447 vol = 1.05  
core size 182 of 447 vol = 1.036  
core size 181 of 447 vol = 1.023  
core size 180 of 447 vol = 1.003  
core size 179 of 447 vol = 0.991  
core size 178 of 447 vol = 0.995  
core size 177 of 447 vol = 0.986  
core size 176 of 447 vol = 0.983  
core size 175 of 447 vol = 0.965  
core size 174 of 447 vol = 0.955  
core size 173 of 447 vol = 0.938  
core size 172 of 447 vol = 0.915  
core size 171 of 447 vol = 0.899  
core size 170 of 447 vol = 0.886  
core size 169 of 447 vol = 0.862  
core size 168 of 447 vol = 0.843  
core size 167 of 447 vol = 0.827  
core size 166 of 447 vol = 0.816  
core size 165 of 447 vol = 0.795  
core size 164 of 447 vol = 0.78  
core size 163 of 447 vol = 0.765  
core size 162 of 447 vol = 0.758  
core size 161 of 447 vol = 0.751  
core size 160 of 447 vol = 0.738  
core size 159 of 447 vol = 0.731  
core size 158 of 447 vol = 0.722  
core size 157 of 447 vol = 0.707  
core size 156 of 447 vol = 0.696  
core size 155 of 447 vol = 0.68  
core size 154 of 447 vol = 0.671  
core size 153 of 447 vol = 0.664  
core size 152 of 447 vol = 0.65

Supplementary Text 2

core size 151 of 447 vol = 0.627  
 core size 150 of 447 vol = 0.618  
 core size 149 of 447 vol = 0.608  
 core size 148 of 447 vol = 0.595  
 core size 147 of 447 vol = 0.583  
 core size 146 of 447 vol = 0.578  
 core size 145 of 447 vol = 0.57  
 core size 144 of 447 vol = 0.561  
 core size 143 of 447 vol = 0.558  
 core size 142 of 447 vol = 0.554  
 core size 141 of 447 vol = 0.537  
 core size 140 of 447 vol = 0.525  
 core size 139 of 447 vol = 0.517  
 core size 138 of 447 vol = 0.506  
 core size 137 of 447 vol = 0.499  
 FINISHED: Min vol ( 0.5 ) reached

# 180 positions (cumulative volume <= 1 Angstrom^3)

|    | start | end | length |
|----|-------|-----|--------|
| 1  | 1     | 13  | 13     |
| 2  | 17    | 17  | 1      |
| 3  | 19    | 20  | 2      |
| 4  | 22    | 22  | 1      |
| 5  | 29    | 29  | 1      |
| 6  | 31    | 31  | 1      |
| 7  | 38    | 38  | 1      |
| 8  | 47    | 47  | 1      |
| 9  | 49    | 50  | 2      |
| 10 | 54    | 66  | 13     |
| 11 | 68    | 69  | 2      |
| 12 | 72    | 72  | 1      |
| 13 | 75    | 78  | 4      |
| 14 | 86    | 87  | 2      |
| 15 | 95    | 98  | 4      |
| 16 | 100   | 105 | 6      |
| 17 | 109   | 113 | 5      |
| 18 | 115   | 117 | 3      |
| 19 | 121   | 127 | 7      |
| 20 | 129   | 130 | 2      |
| 21 | 133   | 140 | 8      |
| 22 | 148   | 166 | 19     |
| 23 | 214   | 225 | 12     |
| 24 | 232   | 232 | 1      |
| 25 | 239   | 239 | 1      |
| 26 | 251   | 252 | 2      |
| 27 | 259   | 265 | 7      |
| 28 | 267   | 267 | 1      |
| 29 | 311   | 311 | 1      |
| 30 | 318   | 333 | 16     |
| 31 | 363   | 370 | 8      |

Supplementary Text 2

|    |     |     |   |
|----|-----|-----|---|
| 32 | 375 | 375 | 1 |
| 33 | 377 | 379 | 3 |
| 34 | 382 | 386 | 5 |
| 35 | 388 | 388 | 1 |
| 36 | 390 | 391 | 2 |
| 37 | 393 | 393 | 1 |
| 38 | 414 | 419 | 6 |
| 39 | 437 | 437 | 1 |
| 40 | 439 | 439 | 1 |
| 41 | 441 | 441 | 1 |
| 42 | 443 | 451 | 9 |
| 43 | 453 | 453 | 1 |

# 228 positions (cumulative volume <= 2 Angstrom^3)

|    | start | end | length |
|----|-------|-----|--------|
| 1  | 1     | 20  | 20     |
| 2  | 22    | 22  | 1      |
| 3  | 29    | 29  | 1      |
| 4  | 31    | 32  | 2      |
| 5  | 38    | 38  | 1      |
| 6  | 46    | 50  | 5      |
| 7  | 54    | 73  | 20     |
| 8  | 75    | 78  | 4      |
| 9  | 84    | 84  | 1      |
| 10 | 86    | 87  | 2      |
| 11 | 89    | 89  | 1      |
| 12 | 92    | 98  | 7      |
| 13 | 100   | 105 | 6      |
| 14 | 107   | 107 | 1      |
| 15 | 109   | 117 | 9      |
| 16 | 121   | 127 | 7      |
| 17 | 129   | 130 | 2      |
| 18 | 133   | 140 | 8      |
| 19 | 146   | 146 | 1      |
| 20 | 148   | 166 | 19     |
| 21 | 173   | 174 | 2      |
| 22 | 176   | 176 | 1      |
| 23 | 180   | 180 | 1      |
| 24 | 186   | 186 | 1      |
| 25 | 189   | 189 | 1      |
| 26 | 191   | 191 | 1      |
| 27 | 212   | 212 | 1      |
| 28 | 214   | 225 | 12     |
| 29 | 232   | 232 | 1      |
| 30 | 234   | 234 | 1      |
| 31 | 237   | 237 | 1      |
| 32 | 239   | 239 | 1      |
| 33 | 251   | 252 | 2      |
| 34 | 256   | 256 | 1      |
| 35 | 259   | 267 | 9      |
| 36 | 311   | 311 | 1      |

Supplementary Text 2

|    |     |     |    |
|----|-----|-----|----|
| 37 | 318 | 334 | 17 |
| 38 | 357 | 357 | 1  |
| 39 | 363 | 370 | 8  |
| 40 | 375 | 379 | 5  |
| 41 | 382 | 386 | 5  |
| 42 | 388 | 393 | 6  |
| 43 | 411 | 411 | 1  |
| 44 | 414 | 419 | 6  |
| 45 | 428 | 429 | 2  |
| 46 | 431 | 432 | 2  |
| 47 | 434 | 453 | 20 |

# 253 positions (cumulative volume <= 3 Angstrom^3)

|    | start | end | length |
|----|-------|-----|--------|
| 1  | 1     | 22  | 22     |
| 2  | 29    | 29  | 1      |
| 3  | 31    | 33  | 3      |
| 4  | 38    | 38  | 1      |
| 5  | 46    | 51  | 6      |
| 6  | 53    | 78  | 26     |
| 7  | 84    | 84  | 1      |
| 8  | 86    | 87  | 2      |
| 9  | 89    | 89  | 1      |
| 10 | 91    | 105 | 15     |
| 11 | 107   | 107 | 1      |
| 12 | 109   | 117 | 9      |
| 13 | 120   | 130 | 11     |
| 14 | 133   | 141 | 9      |
| 15 | 146   | 166 | 21     |
| 16 | 172   | 174 | 3      |
| 17 | 176   | 176 | 1      |
| 18 | 180   | 180 | 1      |
| 19 | 184   | 184 | 1      |
| 20 | 186   | 186 | 1      |
| 21 | 189   | 189 | 1      |
| 22 | 191   | 191 | 1      |
| 23 | 211   | 225 | 15     |
| 24 | 232   | 232 | 1      |
| 25 | 234   | 234 | 1      |
| 26 | 237   | 237 | 1      |
| 27 | 239   | 239 | 1      |
| 28 | 251   | 252 | 2      |
| 29 | 256   | 267 | 12     |
| 30 | 310   | 312 | 3      |
| 31 | 317   | 334 | 18     |
| 32 | 356   | 357 | 2      |
| 33 | 363   | 370 | 8      |
| 34 | 375   | 379 | 5      |
| 35 | 382   | 394 | 13     |
| 36 | 411   | 411 | 1      |
| 37 | 414   | 420 | 7      |

Supplementary Text 2

```

38  424 424    1
39  428 429    2
40  431 432    2
41  434 453   20
# 272 positions (cumulative volume <= 4 Angstrom^3)
  start end length
1     1  22    22
2    29  29     1
3    31  33     3
4    36  36     1
5    38  39     2
6    46  78    33
7    84  87     4
8    89 107    19
9   109 117     9
10  120 130    11
11  133 141     9
12  145 166    22
13  172 176     5
14  180 180     1
15  183 184     2
16  186 186     1
17  189 191     3
18  211 225    15
19  227 227     1
20  232 232     1
21  234 234     1
22  237 237     1
23  239 239     1
24  250 253     4
25  256 267    12
26  310 313     4
27  315 315     1
28  317 334    18
29  356 358     3
30  361 361     1
31  363 370     8
32  375 379     5
33  382 394    13
34  408 408     1
35  410 411     2
36  414 420     7
37  424 424     1
38  428 429     2
39  431 432     2
40  434 453    20
# 288 positions (cumulative volume <= 5 Angstrom^3)
  start end length
1     1  22    22
2    27  27     1

```



Supplementary Text 2

|    |     |     |    |
|----|-----|-----|----|
| 3  | 29  | 29  | 1  |
| 4  | 31  | 33  | 3  |
| 5  | 36  | 39  | 4  |
| 6  | 42  | 42  | 1  |
| 7  | 46  | 78  | 33 |
| 8  | 83  | 87  | 5  |
| 9  | 89  | 107 | 19 |
| 10 | 109 | 117 | 9  |
| 11 | 120 | 130 | 11 |
| 12 | 132 | 142 | 11 |
| 13 | 145 | 166 | 22 |
| 14 | 172 | 176 | 5  |
| 15 | 180 | 180 | 1  |
| 16 | 183 | 184 | 2  |
| 17 | 186 | 186 | 1  |
| 18 | 189 | 191 | 3  |
| 19 | 211 | 225 | 15 |
| 20 | 227 | 227 | 1  |
| 21 | 232 | 232 | 1  |
| 22 | 234 | 234 | 1  |
| 23 | 237 | 237 | 1  |
| 24 | 239 | 239 | 1  |
| 25 | 250 | 253 | 4  |
| 26 | 255 | 267 | 13 |
| 27 | 310 | 313 | 4  |
| 28 | 315 | 315 | 1  |
| 29 | 317 | 334 | 18 |
| 30 | 356 | 358 | 3  |
| 31 | 361 | 361 | 1  |
| 32 | 363 | 370 | 8  |
| 33 | 375 | 395 | 21 |
| 34 | 402 | 402 | 1  |
| 35 | 405 | 405 | 1  |
| 36 | 408 | 408 | 1  |
| 37 | 410 | 412 | 3  |
| 38 | 414 | 421 | 8  |
| 39 | 424 | 424 | 1  |
| 40 | 426 | 429 | 4  |
| 41 | 431 | 432 | 2  |
| 42 | 434 | 453 | 20 |

# 301 positions (cumulative volume <= 6 Angstrom^3)

|   | start | end | length |
|---|-------|-----|--------|
| 1 | 1     | 22  | 22     |
| 2 | 27    | 27  | 1      |
| 3 | 29    | 34  | 6      |
| 4 | 36    | 40  | 5      |
| 5 | 42    | 42  | 1      |
| 6 | 45    | 78  | 34     |
| 7 | 83    | 87  | 5      |
| 8 | 89    | 107 | 19     |

Supplementary Text 2

|    |     |     |    |
|----|-----|-----|----|
| 9  | 109 | 117 | 9  |
| 10 | 120 | 130 | 11 |
| 11 | 132 | 142 | 11 |
| 12 | 144 | 166 | 23 |
| 13 | 172 | 177 | 6  |
| 14 | 179 | 180 | 2  |
| 15 | 183 | 186 | 4  |
| 16 | 189 | 191 | 3  |
| 17 | 211 | 225 | 15 |
| 18 | 227 | 227 | 1  |
| 19 | 232 | 234 | 3  |
| 20 | 237 | 237 | 1  |
| 21 | 239 | 239 | 1  |
| 22 | 250 | 253 | 4  |
| 23 | 255 | 267 | 13 |
| 24 | 310 | 313 | 4  |
| 25 | 315 | 315 | 1  |
| 26 | 317 | 335 | 19 |
| 27 | 356 | 358 | 3  |
| 28 | 361 | 361 | 1  |
| 29 | 363 | 371 | 9  |
| 30 | 375 | 395 | 21 |
| 31 | 402 | 402 | 1  |
| 32 | 405 | 405 | 1  |
| 33 | 407 | 408 | 2  |
| 34 | 410 | 412 | 3  |
| 35 | 414 | 422 | 9  |
| 36 | 424 | 424 | 1  |
| 37 | 426 | 429 | 4  |
| 38 | 431 | 432 | 2  |
| 39 | 434 | 453 | 20 |

# 312 positions (cumulative volume <= 7 Angstrom^3)

|    | start | end | length |
|----|-------|-----|--------|
| 1  | 1     | 22  | 22     |
| 2  | 27    | 34  | 8      |
| 3  | 36    | 42  | 7      |
| 4  | 45    | 79  | 35     |
| 5  | 83    | 87  | 5      |
| 6  | 89    | 107 | 19     |
| 7  | 109   | 118 | 10     |
| 8  | 120   | 130 | 11     |
| 9  | 132   | 142 | 11     |
| 10 | 144   | 166 | 23     |
| 11 | 172   | 177 | 6      |
| 12 | 179   | 180 | 2      |
| 13 | 182   | 186 | 5      |
| 14 | 189   | 191 | 3      |
| 15 | 211   | 225 | 15     |
| 16 | 227   | 227 | 1      |
| 17 | 232   | 234 | 3      |

Supplementary Text 2

|    |     |     |    |
|----|-----|-----|----|
| 18 | 237 | 237 | 1  |
| 19 | 239 | 239 | 1  |
| 20 | 250 | 253 | 4  |
| 21 | 255 | 267 | 13 |
| 22 | 302 | 303 | 2  |
| 23 | 310 | 313 | 4  |
| 24 | 315 | 335 | 21 |
| 25 | 356 | 359 | 4  |
| 26 | 361 | 361 | 1  |
| 27 | 363 | 371 | 9  |
| 28 | 375 | 395 | 21 |
| 29 | 402 | 402 | 1  |
| 30 | 405 | 405 | 1  |
| 31 | 407 | 408 | 2  |
| 32 | 410 | 424 | 15 |
| 33 | 426 | 429 | 4  |
| 34 | 431 | 432 | 2  |
| 35 | 434 | 453 | 20 |

# 320 positions (cumulative volume <= 8 Angstrom^3)

|    | start | end | length |
|----|-------|-----|--------|
| 1  | 1     | 23  | 23     |
| 2  | 27    | 34  | 8      |
| 3  | 36    | 42  | 7      |
| 4  | 45    | 79  | 35     |
| 5  | 83    | 87  | 5      |
| 6  | 89    | 107 | 19     |
| 7  | 109   | 118 | 10     |
| 8  | 120   | 130 | 11     |
| 9  | 132   | 142 | 11     |
| 10 | 144   | 167 | 24     |
| 11 | 172   | 177 | 6      |
| 12 | 179   | 186 | 8      |
| 13 | 189   | 191 | 3      |
| 14 | 211   | 225 | 15     |
| 15 | 227   | 227 | 1      |
| 16 | 231   | 234 | 4      |
| 17 | 237   | 237 | 1      |
| 18 | 239   | 239 | 1      |
| 19 | 250   | 253 | 4      |
| 20 | 255   | 268 | 14     |
| 21 | 302   | 303 | 2      |
| 22 | 310   | 313 | 4      |
| 23 | 315   | 335 | 21     |
| 24 | 338   | 338 | 1      |
| 25 | 355   | 359 | 5      |
| 26 | 361   | 361 | 1      |
| 27 | 363   | 371 | 9      |
| 28 | 375   | 395 | 21     |
| 29 | 402   | 402 | 1      |
| 30 | 405   | 405 | 1      |

Supplementary Text 2

```

31  407 408    2
32  410 424   15
33  426 429    4
34  431 453   23

```

# 329 positions (cumulative volume <= 9 Angstrom^3)

```

  start end length
1      1  23    23
2     27  42    16
3     44  79    36
4     83  87     5
5     89 107    19
6    109 130    22
7    132 142    11
8    144 167    24
9    172 191    20
10   211 225    15
11   227 227     1
12   231 234     4
13   237 237     1
14   239 239     1
15   250 253     4
16   255 268    14
17   302 303     2
18   305 305     1
19   310 313     4
20   315 335    21
21   338 338     1
22   355 359     5
23   361 371    11
24   375 395    21
25   402 402     1
26   405 405     1
27   407 424    18
28   426 429     4
29   431 453    23

```

# 336 positions (cumulative volume <= 10 Angstrom^3)

```

  start end length
1      1  23    23
2     27  42    16
3     44  80    37
4     83  87     5
5     89 107    19
6    109 167    59
7    172 191    20
8    211 225    15
9    227 227     1
10   231 234     4
11   237 237     1
12   239 240     2
13   250 268    19

```

Supplementary Text 2

|    |     |     |    |
|----|-----|-----|----|
| 14 | 302 | 303 | 2  |
| 15 | 305 | 305 | 1  |
| 16 | 310 | 313 | 4  |
| 17 | 315 | 335 | 21 |
| 18 | 338 | 338 | 1  |
| 19 | 355 | 371 | 17 |
| 20 | 375 | 395 | 21 |
| 21 | 402 | 402 | 1  |
| 22 | 405 | 424 | 20 |
| 23 | 426 | 429 | 4  |
| 24 | 431 | 453 | 23 |

# 342 positions (cumulative volume <= 11 Angstrom^3)

|    | start | end | length |
|----|-------|-----|--------|
| 1  | 1     | 23  | 23     |
| 2  | 26    | 42  | 17     |
| 3  | 44    | 80  | 37     |
| 4  | 83    | 87  | 5      |
| 5  | 89    | 167 | 79     |
| 6  | 172   | 191 | 20     |
| 7  | 211   | 225 | 15     |
| 8  | 227   | 227 | 1      |
| 9  | 231   | 234 | 4      |
| 10 | 237   | 237 | 1      |
| 11 | 239   | 240 | 2      |
| 12 | 250   | 268 | 19     |
| 13 | 302   | 303 | 2      |
| 14 | 305   | 305 | 1      |
| 15 | 309   | 313 | 5      |
| 16 | 315   | 336 | 22     |
| 17 | 338   | 338 | 1      |
| 18 | 354   | 371 | 18     |
| 19 | 375   | 395 | 21     |
| 20 | 402   | 402 | 1      |
| 21 | 405   | 424 | 20     |
| 22 | 426   | 453 | 28     |

# 346 positions (cumulative volume <= 12 Angstrom^3)

|    | start | end | length |
|----|-------|-----|--------|
| 1  | 1     | 23  | 23     |
| 2  | 26    | 42  | 17     |
| 3  | 44    | 80  | 37     |
| 4  | 83    | 87  | 5      |
| 5  | 89    | 167 | 79     |
| 6  | 172   | 191 | 20     |
| 7  | 211   | 225 | 15     |
| 8  | 227   | 227 | 1      |
| 9  | 229   | 229 | 1      |
| 10 | 231   | 234 | 4      |
| 11 | 237   | 237 | 1      |
| 12 | 239   | 240 | 2      |
| 13 | 250   | 268 | 19     |

Supplementary Text 2

|    |     |     |    |
|----|-----|-----|----|
| 14 | 302 | 303 | 2  |
| 15 | 305 | 306 | 2  |
| 16 | 309 | 336 | 28 |
| 17 | 338 | 338 | 1  |
| 18 | 353 | 371 | 19 |
| 19 | 375 | 395 | 21 |
| 20 | 402 | 402 | 1  |
| 21 | 405 | 424 | 20 |
| 22 | 426 | 453 | 28 |

# 351 positions (cumulative volume <= 13 Angstrom^3)

|    | start | end | length |
|----|-------|-----|--------|
| 1  | 1     | 23  | 23     |
| 2  | 26    | 42  | 17     |
| 3  | 44    | 80  | 37     |
| 4  | 83    | 87  | 5      |
| 5  | 89    | 167 | 79     |
| 6  | 171   | 191 | 21     |
| 7  | 211   | 225 | 15     |
| 8  | 227   | 227 | 1      |
| 9  | 229   | 229 | 1      |
| 10 | 231   | 234 | 4      |
| 11 | 237   | 237 | 1      |
| 12 | 239   | 240 | 2      |
| 13 | 250   | 268 | 19     |
| 14 | 270   | 270 | 1      |
| 15 | 302   | 303 | 2      |
| 16 | 305   | 306 | 2      |
| 17 | 309   | 336 | 28     |
| 18 | 338   | 338 | 1      |
| 19 | 353   | 371 | 19     |
| 20 | 375   | 397 | 23     |
| 21 | 402   | 402 | 1      |
| 22 | 405   | 424 | 20     |
| 23 | 426   | 454 | 29     |

# 355 positions (cumulative volume <= 14 Angstrom^3)

|    | start | end | length |
|----|-------|-----|--------|
| 1  | 1     | 23  | 23     |
| 2  | 26    | 42  | 17     |
| 3  | 44    | 80  | 37     |
| 4  | 83    | 87  | 5      |
| 5  | 89    | 167 | 79     |
| 6  | 170   | 191 | 22     |
| 7  | 211   | 225 | 15     |
| 8  | 227   | 227 | 1      |
| 9  | 229   | 234 | 6      |
| 10 | 237   | 237 | 1      |
| 11 | 239   | 241 | 3      |
| 12 | 250   | 268 | 19     |
| 13 | 270   | 270 | 1      |
| 14 | 302   | 303 | 2      |

Supplementary Text 2

|    |     |     |    |
|----|-----|-----|----|
| 15 | 305 | 306 | 2  |
| 16 | 309 | 336 | 28 |
| 17 | 338 | 338 | 1  |
| 18 | 353 | 371 | 19 |
| 19 | 375 | 397 | 23 |
| 20 | 402 | 402 | 1  |
| 21 | 405 | 454 | 50 |

# 359 positions (cumulative volume <= 15 Angstrom^3)

|    | start | end | length |
|----|-------|-----|--------|
| 1  | 1     | 23  | 23     |
| 2  | 26    | 42  | 17     |
| 3  | 44    | 80  | 37     |
| 4  | 82    | 87  | 6      |
| 5  | 89    | 167 | 79     |
| 6  | 170   | 191 | 22     |
| 7  | 211   | 225 | 15     |
| 8  | 227   | 234 | 8      |
| 9  | 237   | 237 | 1      |
| 10 | 239   | 241 | 3      |
| 11 | 250   | 270 | 21     |
| 12 | 302   | 303 | 2      |
| 13 | 305   | 306 | 2      |
| 14 | 309   | 336 | 28     |
| 15 | 338   | 338 | 1      |
| 16 | 353   | 371 | 19     |
| 17 | 375   | 397 | 23     |
| 18 | 402   | 403 | 2      |
| 19 | 405   | 454 | 50     |

# 362 positions (cumulative volume <= 16 Angstrom^3)

|    | start | end | length |
|----|-------|-----|--------|
| 1  | 1     | 24  | 24     |
| 2  | 26    | 42  | 17     |
| 3  | 44    | 87  | 44     |
| 4  | 89    | 167 | 79     |
| 5  | 170   | 191 | 22     |
| 6  | 211   | 225 | 15     |
| 7  | 227   | 234 | 8      |
| 8  | 237   | 241 | 5      |
| 9  | 250   | 270 | 21     |
| 10 | 302   | 303 | 2      |
| 11 | 305   | 306 | 2      |
| 12 | 309   | 336 | 28     |
| 13 | 338   | 338 | 1      |
| 14 | 353   | 371 | 19     |
| 15 | 375   | 397 | 23     |
| 16 | 402   | 403 | 2      |
| 17 | 405   | 454 | 50     |

# 365 positions (cumulative volume <= 17 Angstrom^3)

|   | start | end | length |
|---|-------|-----|--------|
| 1 | 1     | 24  | 24     |

Supplementary Text 2

|    |     |     |    |
|----|-----|-----|----|
| 2  | 26  | 87  | 62 |
| 3  | 89  | 167 | 79 |
| 4  | 170 | 191 | 22 |
| 5  | 202 | 202 | 1  |
| 6  | 211 | 225 | 15 |
| 7  | 227 | 234 | 8  |
| 8  | 237 | 241 | 5  |
| 9  | 250 | 270 | 21 |
| 10 | 302 | 306 | 5  |
| 11 | 309 | 336 | 28 |
| 12 | 338 | 338 | 1  |
| 13 | 353 | 371 | 19 |
| 14 | 375 | 397 | 23 |
| 15 | 402 | 403 | 2  |
| 16 | 405 | 454 | 50 |

# 368 positions (cumulative volume <= 18 Angstrom^3)

|    | start | end | length |
|----|-------|-----|--------|
| 1  | 1     | 87  | 87     |
| 2  | 89    | 167 | 79     |
| 3  | 170   | 191 | 22     |
| 4  | 202   | 202 | 1      |
| 5  | 211   | 225 | 15     |
| 6  | 227   | 234 | 8      |
| 7  | 237   | 243 | 7      |
| 8  | 250   | 270 | 21     |
| 9  | 302   | 306 | 5      |
| 10 | 309   | 336 | 28     |
| 11 | 338   | 338 | 1      |
| 12 | 353   | 371 | 19     |
| 13 | 375   | 397 | 23     |
| 14 | 402   | 403 | 2      |
| 15 | 405   | 454 | 50     |

# 370 positions (cumulative volume <= 19 Angstrom^3)

|    | start | end | length |
|----|-------|-----|--------|
| 1  | 1     | 87  | 87     |
| 2  | 89    | 167 | 79     |
| 3  | 170   | 191 | 22     |
| 4  | 202   | 202 | 1      |
| 5  | 211   | 234 | 24     |
| 6  | 237   | 243 | 7      |
| 7  | 250   | 270 | 21     |
| 8  | 302   | 306 | 5      |
| 9  | 309   | 338 | 30     |
| 10 | 353   | 371 | 19     |
| 11 | 375   | 397 | 23     |
| 12 | 402   | 403 | 2      |
| 13 | 405   | 454 | 50     |

# 373 positions (cumulative volume <= 20 Angstrom^3)

|   | start | end | length |
|---|-------|-----|--------|
| 1 | 1     | 87  | 87     |



Supplementary Text 2

|    |     |     |    |
|----|-----|-----|----|
| 2  | 89  | 167 | 79 |
| 3  | 170 | 191 | 22 |
| 4  | 197 | 197 | 1  |
| 5  | 202 | 202 | 1  |
| 6  | 211 | 234 | 24 |
| 7  | 237 | 243 | 7  |
| 8  | 250 | 270 | 21 |
| 9  | 302 | 306 | 5  |
| 10 | 308 | 338 | 31 |
| 11 | 353 | 372 | 20 |
| 12 | 375 | 397 | 23 |
| 13 | 402 | 403 | 2  |
| 14 | 405 | 454 | 50 |

# 375 positions (cumulative volume <= 21 Angstrom^3)

|    | start | end | length |
|----|-------|-----|--------|
| 1  | 1     | 87  | 87     |
| 2  | 89    | 167 | 79     |
| 3  | 170   | 191 | 22     |
| 4  | 197   | 197 | 1      |
| 5  | 202   | 202 | 1      |
| 6  | 210   | 234 | 25     |
| 7  | 237   | 243 | 7      |
| 8  | 250   | 270 | 21     |
| 9  | 301   | 306 | 6      |
| 10 | 308   | 338 | 31     |
| 11 | 353   | 372 | 20     |
| 12 | 375   | 397 | 23     |
| 13 | 402   | 403 | 2      |
| 14 | 405   | 454 | 50     |

# 377 positions (cumulative volume <= 22 Angstrom^3)

|    | start | end | length |
|----|-------|-----|--------|
| 1  | 1     | 87  | 87     |
| 2  | 89    | 168 | 80     |
| 3  | 170   | 191 | 22     |
| 4  | 197   | 197 | 1      |
| 5  | 202   | 202 | 1      |
| 6  | 210   | 234 | 25     |
| 7  | 237   | 243 | 7      |
| 8  | 250   | 270 | 21     |
| 9  | 301   | 338 | 38     |
| 10 | 353   | 372 | 20     |
| 11 | 375   | 397 | 23     |
| 12 | 402   | 403 | 2      |
| 13 | 405   | 454 | 50     |

# 379 positions (cumulative volume <= 23 Angstrom^3)

|   | start | end | length |
|---|-------|-----|--------|
| 1 | 1     | 87  | 87     |
| 2 | 89    | 168 | 80     |
| 3 | 170   | 191 | 22     |
| 4 | 197   | 197 | 1      |

Supplementary Text 2

|    |     |     |    |
|----|-----|-----|----|
| 5  | 202 | 202 | 1  |
| 6  | 210 | 234 | 25 |
| 7  | 236 | 243 | 8  |
| 8  | 250 | 270 | 21 |
| 9  | 301 | 338 | 38 |
| 10 | 353 | 372 | 20 |
| 11 | 375 | 397 | 23 |
| 12 | 401 | 403 | 3  |
| 13 | 405 | 454 | 50 |

# 381 positions (cumulative volume <= 24 Angstrom^3)

|    | start | end | length |
|----|-------|-----|--------|
| 1  | 1     | 87  | 87     |
| 2  | 89    | 168 | 80     |
| 3  | 170   | 191 | 22     |
| 4  | 197   | 197 | 1      |
| 5  | 202   | 202 | 1      |
| 6  | 209   | 234 | 26     |
| 7  | 236   | 243 | 8      |
| 8  | 250   | 270 | 21     |
| 9  | 301   | 338 | 38     |
| 10 | 353   | 372 | 20     |
| 11 | 375   | 397 | 23     |
| 12 | 401   | 454 | 54     |

# 383 positions (cumulative volume <= 25 Angstrom^3)

|    | start | end | length |
|----|-------|-----|--------|
| 1  | 1     | 87  | 87     |
| 2  | 89    | 168 | 80     |
| 3  | 170   | 191 | 22     |
| 4  | 197   | 197 | 1      |
| 5  | 202   | 202 | 1      |
| 6  | 209   | 234 | 26     |
| 7  | 236   | 243 | 8      |
| 8  | 250   | 270 | 21     |
| 9  | 301   | 339 | 39     |
| 10 | 353   | 372 | 20     |
| 11 | 375   | 397 | 23     |
| 12 | 400   | 454 | 55     |

# 384 positions (cumulative volume <= 26 Angstrom^3)

|    | start | end | length |
|----|-------|-----|--------|
| 1  | 1     | 87  | 87     |
| 2  | 89    | 191 | 103    |
| 3  | 197   | 197 | 1      |
| 4  | 202   | 202 | 1      |
| 5  | 209   | 234 | 26     |
| 6  | 236   | 243 | 8      |
| 7  | 250   | 270 | 21     |
| 8  | 301   | 339 | 39     |
| 9  | 353   | 372 | 20     |
| 10 | 375   | 397 | 23     |
| 11 | 400   | 454 | 55     |

Supplementary Text 2

# 386 positions (cumulative volume <= 27 Angstrom^3)

|    | start | end | length |
|----|-------|-----|--------|
| 1  | 1     | 87  | 87     |
| 2  | 89    | 191 | 103    |
| 3  | 197   | 197 | 1      |
| 4  | 202   | 202 | 1      |
| 5  | 209   | 243 | 35     |
| 6  | 250   | 270 | 21     |
| 7  | 301   | 339 | 39     |
| 8  | 353   | 372 | 20     |
| 9  | 375   | 398 | 24     |
| 10 | 400   | 454 | 55     |

# 387 positions (cumulative volume <= 28 Angstrom^3)

|    | start | end | length |
|----|-------|-----|--------|
| 1  | 1     | 87  | 87     |
| 2  | 89    | 191 | 103    |
| 3  | 197   | 197 | 1      |
| 4  | 202   | 202 | 1      |
| 5  | 208   | 243 | 36     |
| 6  | 250   | 270 | 21     |
| 7  | 301   | 339 | 39     |
| 8  | 353   | 372 | 20     |
| 9  | 375   | 398 | 24     |
| 10 | 400   | 454 | 55     |

# 388 positions (cumulative volume <= 29 Angstrom^3)

|    | start | end | length |
|----|-------|-----|--------|
| 1  | 1     | 87  | 87     |
| 2  | 89    | 191 | 103    |
| 3  | 196   | 197 | 2      |
| 4  | 202   | 202 | 1      |
| 5  | 208   | 243 | 36     |
| 6  | 250   | 270 | 21     |
| 7  | 301   | 339 | 39     |
| 8  | 353   | 372 | 20     |
| 9  | 375   | 398 | 24     |
| 10 | 400   | 454 | 55     |

# 389 positions (cumulative volume <= 30 Angstrom^3)

|   | start | end | length |
|---|-------|-----|--------|
| 1 | 1     | 87  | 87     |
| 2 | 89    | 191 | 103    |
| 3 | 196   | 197 | 2      |
| 4 | 202   | 202 | 1      |
| 5 | 208   | 243 | 36     |
| 6 | 250   | 270 | 21     |
| 7 | 301   | 339 | 39     |
| 8 | 353   | 372 | 20     |
| 9 | 375   | 454 | 80     |

# 390 positions (cumulative volume <= 31 Angstrom^3)

|   | start | end | length |
|---|-------|-----|--------|
| 1 | 1     | 87  | 87     |

Supplementary Text 2

|    |     |     |     |
|----|-----|-----|-----|
| 2  | 89  | 191 | 103 |
| 3  | 196 | 197 | 2   |
| 4  | 202 | 202 | 1   |
| 5  | 208 | 243 | 36  |
| 6  | 250 | 270 | 21  |
| 7  | 284 | 284 | 1   |
| 8  | 301 | 339 | 39  |
| 9  | 353 | 372 | 20  |
| 10 | 375 | 454 | 80  |

# 391 positions (cumulative volume <= 32 Angstrom^3)

|    | start | end | length |
|----|-------|-----|--------|
| 1  | 1     | 87  | 87     |
| 2  | 89    | 191 | 103    |
| 3  | 196   | 197 | 2      |
| 4  | 202   | 203 | 2      |
| 5  | 208   | 243 | 36     |
| 6  | 250   | 270 | 21     |
| 7  | 284   | 284 | 1      |
| 8  | 301   | 339 | 39     |
| 9  | 353   | 372 | 20     |
| 10 | 375   | 454 | 80     |

# 392 positions (cumulative volume <= 33 Angstrom^3)

|    | start | end | length |
|----|-------|-----|--------|
| 1  | 1     | 87  | 87     |
| 2  | 89    | 191 | 103    |
| 3  | 196   | 197 | 2      |
| 4  | 202   | 203 | 2      |
| 5  | 208   | 244 | 37     |
| 6  | 250   | 270 | 21     |
| 7  | 284   | 284 | 1      |
| 8  | 301   | 339 | 39     |
| 9  | 353   | 372 | 20     |
| 10 | 375   | 454 | 80     |

# 393 positions (cumulative volume <= 34 Angstrom^3)

|    | start | end | length |
|----|-------|-----|--------|
| 1  | 1     | 87  | 87     |
| 2  | 89    | 191 | 103    |
| 3  | 196   | 197 | 2      |
| 4  | 202   | 204 | 3      |
| 5  | 208   | 244 | 37     |
| 6  | 250   | 270 | 21     |
| 7  | 284   | 284 | 1      |
| 8  | 301   | 339 | 39     |
| 9  | 353   | 372 | 20     |
| 10 | 375   | 454 | 80     |

# 393 positions (cumulative volume <= 35 Angstrom^3)

|   | start | end | length |
|---|-------|-----|--------|
| 1 | 1     | 87  | 87     |
| 2 | 89    | 191 | 103    |
| 3 | 196   | 197 | 2      |

Supplementary Text 2

|    |     |     |    |
|----|-----|-----|----|
| 4  | 202 | 204 | 3  |
| 5  | 208 | 244 | 37 |
| 6  | 250 | 270 | 21 |
| 7  | 284 | 284 | 1  |
| 8  | 301 | 339 | 39 |
| 9  | 353 | 372 | 20 |
| 10 | 375 | 454 | 80 |

# 394 positions (cumulative volume <= 36 Angstrom^3)

|    | start | end | length |
|----|-------|-----|--------|
| 1  | 1     | 87  | 87     |
| 2  | 89    | 191 | 103    |
| 3  | 196   | 197 | 2      |
| 4  | 202   | 205 | 4      |
| 5  | 208   | 244 | 37     |
| 6  | 250   | 270 | 21     |
| 7  | 284   | 284 | 1      |
| 8  | 301   | 339 | 39     |
| 9  | 353   | 372 | 20     |
| 10 | 375   | 454 | 80     |

# 394 positions (cumulative volume <= 37 Angstrom^3)

|    | start | end | length |
|----|-------|-----|--------|
| 1  | 1     | 87  | 87     |
| 2  | 89    | 191 | 103    |
| 3  | 196   | 197 | 2      |
| 4  | 202   | 205 | 4      |
| 5  | 208   | 244 | 37     |
| 6  | 250   | 270 | 21     |
| 7  | 284   | 284 | 1      |
| 8  | 301   | 339 | 39     |
| 9  | 353   | 372 | 20     |
| 10 | 375   | 454 | 80     |

# 395 positions (cumulative volume <= 38 Angstrom^3)

|    | start | end | length |
|----|-------|-----|--------|
| 1  | 1     | 87  | 87     |
| 2  | 89    | 191 | 103    |
| 3  | 196   | 197 | 2      |
| 4  | 202   | 205 | 4      |
| 5  | 208   | 244 | 37     |
| 6  | 249   | 270 | 22     |
| 7  | 284   | 284 | 1      |
| 8  | 301   | 339 | 39     |
| 9  | 353   | 372 | 20     |
| 10 | 375   | 454 | 80     |

# 396 positions (cumulative volume <= 39 Angstrom^3)

|   | start | end | length |
|---|-------|-----|--------|
| 1 | 1     | 87  | 87     |
| 2 | 89    | 191 | 103    |
| 3 | 196   | 197 | 2      |
| 4 | 202   | 205 | 4      |
| 5 | 208   | 244 | 37     |

Supplementary Text 2

|    |     |     |    |
|----|-----|-----|----|
| 6  | 246 | 246 | 1  |
| 7  | 249 | 270 | 22 |
| 8  | 284 | 284 | 1  |
| 9  | 301 | 339 | 39 |
| 10 | 353 | 372 | 20 |
| 11 | 375 | 454 | 80 |

# 396 positions (cumulative volume <= 40 Angstrom^3)

|    | start | end | length |
|----|-------|-----|--------|
| 1  | 1     | 87  | 87     |
| 2  | 89    | 191 | 103    |
| 3  | 196   | 197 | 2      |
| 4  | 202   | 205 | 4      |
| 5  | 208   | 244 | 37     |
| 6  | 246   | 246 | 1      |
| 7  | 249   | 270 | 22     |
| 8  | 284   | 284 | 1      |
| 9  | 301   | 339 | 39     |
| 10 | 353   | 372 | 20     |
| 11 | 375   | 454 | 80     |

# 397 positions (cumulative volume <= 41 Angstrom^3)

|    | start | end | length |
|----|-------|-----|--------|
| 1  | 1     | 87  | 87     |
| 2  | 89    | 191 | 103    |
| 3  | 196   | 198 | 3      |
| 4  | 202   | 205 | 4      |
| 5  | 208   | 244 | 37     |
| 6  | 246   | 246 | 1      |
| 7  | 249   | 270 | 22     |
| 8  | 284   | 284 | 1      |
| 9  | 301   | 339 | 39     |
| 10 | 353   | 372 | 20     |
| 11 | 375   | 454 | 80     |

# 397 positions (cumulative volume <= 42 Angstrom^3)

|    | start | end | length |
|----|-------|-----|--------|
| 1  | 1     | 87  | 87     |
| 2  | 89    | 191 | 103    |
| 3  | 196   | 198 | 3      |
| 4  | 202   | 205 | 4      |
| 5  | 208   | 244 | 37     |
| 6  | 246   | 246 | 1      |
| 7  | 249   | 270 | 22     |
| 8  | 284   | 284 | 1      |
| 9  | 301   | 339 | 39     |
| 10 | 353   | 372 | 20     |
| 11 | 375   | 454 | 80     |

# 397 positions (cumulative volume <= 43 Angstrom^3)

|   | start | end | length |
|---|-------|-----|--------|
| 1 | 1     | 87  | 87     |
| 2 | 89    | 191 | 103    |
| 3 | 196   | 198 | 3      |

Supplementary Text 2

|    |     |     |    |
|----|-----|-----|----|
| 4  | 202 | 205 | 4  |
| 5  | 208 | 244 | 37 |
| 6  | 246 | 246 | 1  |
| 7  | 249 | 270 | 22 |
| 8  | 284 | 284 | 1  |
| 9  | 301 | 339 | 39 |
| 10 | 353 | 372 | 20 |
| 11 | 375 | 454 | 80 |

# 398 positions (cumulative volume <= 44 Angstrom^3)

|    | start | end | length |
|----|-------|-----|--------|
| 1  | 1     | 87  | 87     |
| 2  | 89    | 191 | 103    |
| 3  | 196   | 198 | 3      |
| 4  | 202   | 205 | 4      |
| 5  | 208   | 244 | 37     |
| 6  | 246   | 246 | 1      |
| 7  | 249   | 270 | 22     |
| 8  | 282   | 282 | 1      |
| 9  | 284   | 284 | 1      |
| 10 | 301   | 339 | 39     |
| 11 | 353   | 372 | 20     |
| 12 | 375   | 454 | 80     |

# 398 positions (cumulative volume <= 45 Angstrom^3)

|    | start | end | length |
|----|-------|-----|--------|
| 1  | 1     | 87  | 87     |
| 2  | 89    | 191 | 103    |
| 3  | 196   | 198 | 3      |
| 4  | 202   | 205 | 4      |
| 5  | 208   | 244 | 37     |
| 6  | 246   | 246 | 1      |
| 7  | 249   | 270 | 22     |
| 8  | 282   | 282 | 1      |
| 9  | 284   | 284 | 1      |
| 10 | 301   | 339 | 39     |
| 11 | 353   | 372 | 20     |
| 12 | 375   | 454 | 80     |

# 399 positions (cumulative volume <= 46 Angstrom^3)

|    | start | end | length |
|----|-------|-----|--------|
| 1  | 1     | 87  | 87     |
| 2  | 89    | 191 | 103    |
| 3  | 196   | 198 | 3      |
| 4  | 202   | 205 | 4      |
| 5  | 208   | 244 | 37     |
| 6  | 246   | 247 | 2      |
| 7  | 249   | 270 | 22     |
| 8  | 282   | 282 | 1      |
| 9  | 284   | 284 | 1      |
| 10 | 301   | 339 | 39     |
| 11 | 353   | 372 | 20     |
| 12 | 375   | 454 | 80     |

Supplementary Text 2

# 399 positions (cumulative volume <= 47 Angstrom^3)

|    | start | end | length |
|----|-------|-----|--------|
| 1  | 1     | 87  | 87     |
| 2  | 89    | 191 | 103    |
| 3  | 196   | 198 | 3      |
| 4  | 202   | 205 | 4      |
| 5  | 208   | 244 | 37     |
| 6  | 246   | 247 | 2      |
| 7  | 249   | 270 | 22     |
| 8  | 282   | 282 | 1      |
| 9  | 284   | 284 | 1      |
| 10 | 301   | 339 | 39     |
| 11 | 353   | 372 | 20     |
| 12 | 375   | 454 | 80     |

# 399 positions (cumulative volume <= 48 Angstrom^3)

|    | start | end | length |
|----|-------|-----|--------|
| 1  | 1     | 87  | 87     |
| 2  | 89    | 191 | 103    |
| 3  | 196   | 198 | 3      |
| 4  | 202   | 205 | 4      |
| 5  | 208   | 244 | 37     |
| 6  | 246   | 247 | 2      |
| 7  | 249   | 270 | 22     |
| 8  | 282   | 282 | 1      |
| 9  | 284   | 284 | 1      |
| 10 | 301   | 339 | 39     |
| 11 | 353   | 372 | 20     |
| 12 | 375   | 454 | 80     |

# 400 positions (cumulative volume <= 49 Angstrom^3)

|    | start | end | length |
|----|-------|-----|--------|
| 1  | 1     | 87  | 87     |
| 2  | 89    | 191 | 103    |
| 3  | 195   | 198 | 4      |
| 4  | 202   | 205 | 4      |
| 5  | 208   | 244 | 37     |
| 6  | 246   | 247 | 2      |
| 7  | 249   | 270 | 22     |
| 8  | 282   | 282 | 1      |
| 9  | 284   | 284 | 1      |
| 10 | 301   | 339 | 39     |
| 11 | 353   | 372 | 20     |
| 12 | 375   | 454 | 80     |

# 400 positions (cumulative volume <= 50 Angstrom^3)

|   | start | end | length |
|---|-------|-----|--------|
| 1 | 1     | 87  | 87     |
| 2 | 89    | 191 | 103    |
| 3 | 195   | 198 | 4      |
| 4 | 202   | 205 | 4      |
| 5 | 208   | 244 | 37     |
| 6 | 246   | 247 | 2      |



Supplementary Text 2

```
7 249 270 22
8 282 282 1
9 284 284 1
10 301 339 39
11 353 372 20
12 375 454 80
# 401 positions (cumulative volume <= 51 Angstrom^3)
  start end length
1 1 87 87
2 89 191 103
3 195 198 4
4 202 206 5
5 208 244 37
6 246 247 2
7 249 270 22
8 282 282 1
9 284 284 1
10 301 339 39
11 353 372 20
12 375 454 80
# 401 positions (cumulative volume <= 52 Angstrom^3)
  start end length
1 1 87 87
2 89 191 103
3 195 198 4
4 202 206 5
5 208 244 37
6 246 247 2
7 249 270 22
8 282 282 1
9 284 284 1
10 301 339 39
11 353 372 20
12 375 454 80
# 401 positions (cumulative volume <= 53 Angstrom^3)
  start end length
1 1 87 87
2 89 191 103
3 195 198 4
4 202 206 5
5 208 244 37
6 246 247 2
7 249 270 22
8 282 282 1
9 284 284 1
10 301 339 39
11 353 372 20
12 375 454 80
# 402 positions (cumulative volume <= 54 Angstrom^3)
  start end length
```

Supplementary Text 2

|    |     |     |     |
|----|-----|-----|-----|
| 1  | 1   | 87  | 87  |
| 2  | 89  | 191 | 103 |
| 3  | 195 | 198 | 4   |
| 4  | 202 | 206 | 5   |
| 5  | 208 | 244 | 37  |
| 6  | 246 | 247 | 2   |
| 7  | 249 | 270 | 22  |
| 8  | 282 | 282 | 1   |
| 9  | 284 | 284 | 1   |
| 10 | 300 | 339 | 40  |
| 11 | 353 | 372 | 20  |
| 12 | 375 | 454 | 80  |

# 402 positions (cumulative volume <= 55 Angstrom^3)

|    | start | end | length |
|----|-------|-----|--------|
| 1  | 1     | 87  | 87     |
| 2  | 89    | 191 | 103    |
| 3  | 195   | 198 | 4      |
| 4  | 202   | 206 | 5      |
| 5  | 208   | 244 | 37     |
| 6  | 246   | 247 | 2      |
| 7  | 249   | 270 | 22     |
| 8  | 282   | 282 | 1      |
| 9  | 284   | 284 | 1      |
| 10 | 300   | 339 | 40     |
| 11 | 353   | 372 | 20     |
| 12 | 375   | 454 | 80     |

# 402 positions (cumulative volume <= 56 Angstrom^3)

|    | start | end | length |
|----|-------|-----|--------|
| 1  | 1     | 87  | 87     |
| 2  | 89    | 191 | 103    |
| 3  | 195   | 198 | 4      |
| 4  | 202   | 206 | 5      |
| 5  | 208   | 244 | 37     |
| 6  | 246   | 247 | 2      |
| 7  | 249   | 270 | 22     |
| 8  | 282   | 282 | 1      |
| 9  | 284   | 284 | 1      |
| 10 | 300   | 339 | 40     |
| 11 | 353   | 372 | 20     |
| 12 | 375   | 454 | 80     |

# 403 positions (cumulative volume <= 57 Angstrom^3)

|   | start | end | length |
|---|-------|-----|--------|
| 1 | 1     | 87  | 87     |
| 2 | 89    | 191 | 103    |
| 3 | 195   | 198 | 4      |
| 4 | 202   | 206 | 5      |
| 5 | 208   | 244 | 37     |
| 6 | 246   | 270 | 25     |
| 7 | 282   | 282 | 1      |
| 8 | 284   | 284 | 1      |

Supplementary Text 2

```
9    300 339    40
10   353 372    20
11   375 454    80
# 403 positions (cumulative volume <= 58 Angstrom^3)
  start end length
1     1  87     87
2    89 191    103
3   195 198     4
4   202 206     5
5   208 244    37
6   246 270    25
7   282 282     1
8   284 284     1
9   300 339    40
10  353 372    20
11  375 454    80
# 403 positions (cumulative volume <= 59 Angstrom^3)
  start end length
1     1  87     87
2    89 191    103
3   195 198     4
4   202 206     5
5   208 244    37
6   246 270    25
7   282 282     1
8   284 284     1
9   300 339    40
10  353 372    20
11  375 454    80
# 403 positions (cumulative volume <= 60 Angstrom^3)
  start end length
1     1  87     87
2    89 191    103
3   195 198     4
4   202 206     5
5   208 244    37
6   246 270    25
7   282 282     1
8   284 284     1
9   300 339    40
10  353 372    20
11  375 454    80
# 404 positions (cumulative volume <= 61 Angstrom^3)
  start end length
1     1  87     87
2    89 191    103
3   195 198     4
4   202 206     5
5   208 244    37
6   246 270    25
```

Supplementary Text 2

```

7    282 282    1
8    284 284    1
9    286 286    1
10   300 339   40
11   353 372   20
12   375 454   80
# 404 positions (cumulative volume <= 62 Angstrom^3)
  start end length
1     1  87    87
2    89 191   103
3   195 198    4
4   202 206    5
5   208 244   37
6   246 270   25
7   282 282    1
8   284 284    1
9   286 286    1
10  300 339   40
11  353 372   20
12  375 454   80
# 404 positions (cumulative volume <= 63 Angstrom^3)
  start end length
1     1  87    87
2    89 191   103
3   195 198    4
4   202 206    5
5   208 244   37
6   246 270   25
7   282 282    1
8   284 284    1
9   286 286    1
10  300 339   40
11  353 372   20
12  375 454   80
# 404 positions (cumulative volume <= 64 Angstrom^3)
  start end length
1     1  87    87
2    89 191   103
3   195 198    4
4   202 206    5
5   208 244   37
6   246 270   25
7   282 282    1
8   284 284    1
9   286 286    1
10  300 339   40
11  353 372   20
12  375 454   80
# 405 positions (cumulative volume <= 65 Angstrom^3)
  start end length

```

Supplementary Text 2

|    |     |     |     |
|----|-----|-----|-----|
| 1  | 1   | 87  | 87  |
| 2  | 89  | 191 | 103 |
| 3  | 194 | 198 | 5   |
| 4  | 202 | 206 | 5   |
| 5  | 208 | 244 | 37  |
| 6  | 246 | 270 | 25  |
| 7  | 282 | 282 | 1   |
| 8  | 284 | 284 | 1   |
| 9  | 286 | 286 | 1   |
| 10 | 300 | 339 | 40  |
| 11 | 353 | 372 | 20  |
| 12 | 375 | 454 | 80  |

# 405 positions (cumulative volume <= 66 Angstrom^3)

|    | start | end | length |
|----|-------|-----|--------|
| 1  | 1     | 87  | 87     |
| 2  | 89    | 191 | 103    |
| 3  | 194   | 198 | 5      |
| 4  | 202   | 206 | 5      |
| 5  | 208   | 244 | 37     |
| 6  | 246   | 270 | 25     |
| 7  | 282   | 282 | 1      |
| 8  | 284   | 284 | 1      |
| 9  | 286   | 286 | 1      |
| 10 | 300   | 339 | 40     |
| 11 | 353   | 372 | 20     |
| 12 | 375   | 454 | 80     |

# 405 positions (cumulative volume <= 67 Angstrom^3)

|    | start | end | length |
|----|-------|-----|--------|
| 1  | 1     | 87  | 87     |
| 2  | 89    | 191 | 103    |
| 3  | 194   | 198 | 5      |
| 4  | 202   | 206 | 5      |
| 5  | 208   | 244 | 37     |
| 6  | 246   | 270 | 25     |
| 7  | 282   | 282 | 1      |
| 8  | 284   | 284 | 1      |
| 9  | 286   | 286 | 1      |
| 10 | 300   | 339 | 40     |
| 11 | 353   | 372 | 20     |
| 12 | 375   | 454 | 80     |

# 405 positions (cumulative volume <= 68 Angstrom^3)

|   | start | end | length |
|---|-------|-----|--------|
| 1 | 1     | 87  | 87     |
| 2 | 89    | 191 | 103    |
| 3 | 194   | 198 | 5      |
| 4 | 202   | 206 | 5      |
| 5 | 208   | 244 | 37     |
| 6 | 246   | 270 | 25     |
| 7 | 282   | 282 | 1      |
| 8 | 284   | 284 | 1      |

Supplementary Text 2

```
9    286 286    1
10   300 339    40
11   353 372    20
12   375 454    80
# 406 positions (cumulative volume <= 69 Angstrom^3)
  start end length
1     1  87     87
2    89 191    103
3   194 198     5
4   202 206     5
5   208 244    37
6   246 270    25
7   282 282     1
8   284 286     3
9   300 339    40
10  353 372    20
11  375 454    80
# 406 positions (cumulative volume <= 70 Angstrom^3)
  start end length
1     1  87     87
2    89 191    103
3   194 198     5
4   202 206     5
5   208 244    37
6   246 270    25
7   282 282     1
8   284 286     3
9   300 339    40
10  353 372    20
11  375 454    80
# 406 positions (cumulative volume <= 71 Angstrom^3)
  start end length
1     1  87     87
2    89 191    103
3   194 198     5
4   202 206     5
5   208 244    37
6   246 270    25
7   282 282     1
8   284 286     3
9   300 339    40
10  353 372    20
11  375 454    80
# 406 positions (cumulative volume <= 72 Angstrom^3)
  start end length
1     1  87     87
2    89 191    103
3   194 198     5
4   202 206     5
5   208 244    37
```

Supplementary Text 2

```
6    246 270    25
7    282 282     1
8    284 286     3
9    300 339    40
10   353 372    20
11   375 454    80
# 407 positions (cumulative volume <= 73 Angstrom^3)
  start end length
1     1  87     87
2    89 191    103
3   194 198     5
4   202 206     5
5   208 270    63
6   282 282     1
7   284 286     3
8   300 339    40
9   353 372    20
10  375 454    80
# 407 positions (cumulative volume <= 74 Angstrom^3)
  start end length
1     1  87     87
2    89 191    103
3   194 198     5
4   202 206     5
5   208 270    63
6   282 282     1
7   284 286     3
8   300 339    40
9   353 372    20
10  375 454    80
# 407 positions (cumulative volume <= 75 Angstrom^3)
  start end length
1     1  87     87
2    89 191    103
3   194 198     5
4   202 206     5
5   208 270    63
6   282 282     1
7   284 286     3
8   300 339    40
9   353 372    20
10  375 454    80
# 407 positions (cumulative volume <= 76 Angstrom^3)
  start end length
1     1  87     87
2    89 191    103
3   194 198     5
4   202 206     5
5   208 270    63
6   282 282     1
```

Supplementary Text 2

```
7 284 286 3
8 300 339 40
9 353 372 20
10 375 454 80
# 408 positions (cumulative volume <= 77 Angstrom^3)
  start end length
1 1 87 87
2 89 191 103
3 194 198 5
4 202 206 5
5 208 270 63
6 282 282 1
7 284 286 3
8 289 289 1
9 300 339 40
10 353 372 20
11 375 454 80
# 408 positions (cumulative volume <= 78 Angstrom^3)
  start end length
1 1 87 87
2 89 191 103
3 194 198 5
4 202 206 5
5 208 270 63
6 282 282 1
7 284 286 3
8 289 289 1
9 300 339 40
10 353 372 20
11 375 454 80
# 408 positions (cumulative volume <= 79 Angstrom^3)
  start end length
1 1 87 87
2 89 191 103
3 194 198 5
4 202 206 5
5 208 270 63
6 282 282 1
7 284 286 3
8 289 289 1
9 300 339 40
10 353 372 20
11 375 454 80
# 408 positions (cumulative volume <= 80 Angstrom^3)
  start end length
1 1 87 87
2 89 191 103
3 194 198 5
4 202 206 5
5 208 270 63
```



Supplementary Text 2

|    |     |     |    |
|----|-----|-----|----|
| 6  | 282 | 282 | 1  |
| 7  | 284 | 286 | 3  |
| 8  | 289 | 289 | 1  |
| 9  | 300 | 339 | 40 |
| 10 | 353 | 372 | 20 |
| 11 | 375 | 454 | 80 |

# 408 positions (cumulative volume <= 81 Angstrom^3)

|    | start | end | length |
|----|-------|-----|--------|
| 1  | 1     | 87  | 87     |
| 2  | 89    | 191 | 103    |
| 3  | 194   | 198 | 5      |
| 4  | 202   | 206 | 5      |
| 5  | 208   | 270 | 63     |
| 6  | 282   | 282 | 1      |
| 7  | 284   | 286 | 3      |
| 8  | 289   | 289 | 1      |
| 9  | 300   | 339 | 40     |
| 10 | 353   | 372 | 20     |
| 11 | 375   | 454 | 80     |

# 408 positions (cumulative volume <= 82 Angstrom^3)

|    | start | end | length |
|----|-------|-----|--------|
| 1  | 1     | 87  | 87     |
| 2  | 89    | 191 | 103    |
| 3  | 194   | 198 | 5      |
| 4  | 202   | 206 | 5      |
| 5  | 208   | 270 | 63     |
| 6  | 282   | 282 | 1      |
| 7  | 284   | 286 | 3      |
| 8  | 289   | 289 | 1      |
| 9  | 300   | 339 | 40     |
| 10 | 353   | 372 | 20     |
| 11 | 375   | 454 | 80     |

# 409 positions (cumulative volume <= 83 Angstrom^3)

|    | start | end | length |
|----|-------|-----|--------|
| 1  | 1     | 87  | 87     |
| 2  | 89    | 191 | 103    |
| 3  | 194   | 198 | 5      |
| 4  | 202   | 206 | 5      |
| 5  | 208   | 270 | 63     |
| 6  | 282   | 286 | 5      |
| 7  | 289   | 289 | 1      |
| 8  | 300   | 339 | 40     |
| 9  | 353   | 372 | 20     |
| 10 | 375   | 454 | 80     |

# 409 positions (cumulative volume <= 84 Angstrom^3)

|   | start | end | length |
|---|-------|-----|--------|
| 1 | 1     | 87  | 87     |
| 2 | 89    | 191 | 103    |
| 3 | 194   | 198 | 5      |
| 4 | 202   | 206 | 5      |

Supplementary Text 2

|    |     |     |    |
|----|-----|-----|----|
| 5  | 208 | 270 | 63 |
| 6  | 282 | 286 | 5  |
| 7  | 289 | 289 | 1  |
| 8  | 300 | 339 | 40 |
| 9  | 353 | 372 | 20 |
| 10 | 375 | 454 | 80 |

# 409 positions (cumulative volume <= 85 Angstrom^3)

|    | start | end | length |
|----|-------|-----|--------|
| 1  | 1     | 87  | 87     |
| 2  | 89    | 191 | 103    |
| 3  | 194   | 198 | 5      |
| 4  | 202   | 206 | 5      |
| 5  | 208   | 270 | 63     |
| 6  | 282   | 286 | 5      |
| 7  | 289   | 289 | 1      |
| 8  | 300   | 339 | 40     |
| 9  | 353   | 372 | 20     |
| 10 | 375   | 454 | 80     |

# 409 positions (cumulative volume <= 86 Angstrom^3)

|    | start | end | length |
|----|-------|-----|--------|
| 1  | 1     | 87  | 87     |
| 2  | 89    | 191 | 103    |
| 3  | 194   | 198 | 5      |
| 4  | 202   | 206 | 5      |
| 5  | 208   | 270 | 63     |
| 6  | 282   | 286 | 5      |
| 7  | 289   | 289 | 1      |
| 8  | 300   | 339 | 40     |
| 9  | 353   | 372 | 20     |
| 10 | 375   | 454 | 80     |

# 409 positions (cumulative volume <= 87 Angstrom^3)

|    | start | end | length |
|----|-------|-----|--------|
| 1  | 1     | 87  | 87     |
| 2  | 89    | 191 | 103    |
| 3  | 194   | 198 | 5      |
| 4  | 202   | 206 | 5      |
| 5  | 208   | 270 | 63     |
| 6  | 282   | 286 | 5      |
| 7  | 289   | 289 | 1      |
| 8  | 300   | 339 | 40     |
| 9  | 353   | 372 | 20     |
| 10 | 375   | 454 | 80     |

# 410 positions (cumulative volume <= 88 Angstrom^3)

|   | start | end | length |
|---|-------|-----|--------|
| 1 | 1     | 87  | 87     |
| 2 | 89    | 191 | 103    |
| 3 | 194   | 198 | 5      |
| 4 | 202   | 206 | 5      |
| 5 | 208   | 270 | 63     |
| 6 | 282   | 286 | 5      |

Supplementary Text 2

```
7    288 289    2
8    300 339   40
9    353 372   20
10   375 454   80
# 410 positions (cumulative volume <= 89 Angstrom^3)
  start end length
1     1  87    87
2    89 191   103
3   194 198    5
4   202 206    5
5   208 270   63
6   282 286    5
7   288 289    2
8   300 339   40
9   353 372   20
10  375 454   80
# 410 positions (cumulative volume <= 90 Angstrom^3)
  start end length
1     1  87    87
2    89 191   103
3   194 198    5
4   202 206    5
5   208 270   63
6   282 286    5
7   288 289    2
8   300 339   40
9   353 372   20
10  375 454   80
# 410 positions (cumulative volume <= 91 Angstrom^3)
  start end length
1     1  87    87
2    89 191   103
3   194 198    5
4   202 206    5
5   208 270   63
6   282 286    5
7   288 289    2
8   300 339   40
9   353 372   20
10  375 454   80
# 410 positions (cumulative volume <= 92 Angstrom^3)
  start end length
1     1  87    87
2    89 191   103
3   194 198    5
4   202 206    5
5   208 270   63
6   282 286    5
7   288 289    2
8   300 339   40
```

Supplementary Text 2

```

9      353 372      20
10     375 454      80
# 410 positions (cumulative volume <= 93 Angstrom^3)
  start end length
1       1  87      87
2      89 191     103
3     194 198       5
4     202 206       5
5     208 270      63
6     282 286       5
7     288 289       2
8     300 339      40
9     353 372      20
10    375 454      80
# 411 positions (cumulative volume <= 94 Angstrom^3)
  start end length
1       1  87      87
2      89 191     103
3     194 198       5
4     202 206       5
5     208 270      63
6     282 289       8
7     300 339      40
8     353 372      20
9     375 454      80
# 411 positions (cumulative volume <= 95 Angstrom^3)
  start end length
1       1  87      87
2      89 191     103
3     194 198       5
4     202 206       5
5     208 270      63
6     282 289       8
7     300 339      40
8     353 372      20
9     375 454      80
# 411 positions (cumulative volume <= 96 Angstrom^3)
  start end length
1       1  87      87
2      89 191     103
3     194 198       5
4     202 206       5
5     208 270      63
6     282 289       8
7     300 339      40
8     353 372      20
9     375 454      80
# 411 positions (cumulative volume <= 97 Angstrom^3)
  start end length
1       1  87      87

```

Supplementary Text 2

```
2    89 191    103
3   194 198     5
4   202 206     5
5   208 270    63
6   282 289     8
7   300 339    40
8   353 372    20
9   375 454    80
# 411 positions (cumulative volume <= 98 Angstrom^3)
  start end length
1     1  87     87
2    89 191    103
3   194 198     5
4   202 206     5
5   208 270    63
6   282 289     8
7   300 339    40
8   353 372    20
9   375 454    80
# 411 positions (cumulative volume <= 99 Angstrom^3)
  start end length
1     1  87     87
2    89 191    103
3   194 198     5
4   202 206     5
5   208 270    63
6   282 289     8
7   300 339    40
8   353 372    20
9   375 454    80
# 412 positions (cumulative volume <= 100 Angstrom^3)
  start end length
1     1  87     87
2    89 191    103
3   194 198     5
4   202 206     5
5   208 270    63
6   281 289     9
7   300 339    40
8   353 372    20
9   375 454    80
```
