# Supplementary material for: Insights into the mechanism(s) of digestion of crystalline cellulose by plant class C GH9 endoglucanases
Source: PubMed Central journal article supplement (PMC7385011; doi:10.1007/s00894-019-4133-1), 2019-07-23
Supplement: 894_2019_4133_MOESM5_ESM.pdf [file 894_2019_4133_MOESM5_ESM.pdf]

### Supplementary Text 3

-----  
Amber 16 SANDER

2016  
-----

| Run on 08/13/2017 at 00:51:42

| Executable path: /usr/local/amber16/bin/sander

| Working directory: /Users/Swati

| Hostname: Unknown

| [-O]verwriting output

#### File Assignments:

| MDIN: minimization\_file\_2.in

| MDOUT: 3WY9\_min3\_2.out

| INPCRD: 3WY9\_min3\_1.rst

| PARM: /Users/Swati/3WY9\_files/3WY9.prmtop

| RESTRT: 3WY9\_min3\_2.rst

| REFC: refc

| MDVEL: mdvel

| MDFRC: mdfrc

| MDEN: mden

| MDCRD: mdcrd

| MDINFO: mdinfo

| MTMD: mtmd

| INPDIP: inpdip

| RSTDIP: rstcip

| INPTRA: inptraj

Here is the input file:

PROT: minimization\_2

&cntrl

imin = 1,

maxcyc = 5000,

ncyc = 10000,

igb = 0,

ntpr = 100,

ntp = 0

cut = 12

&end

-----  
1. RESOURCE USE:  
-----

| Flags:

| getting box info from netcdf restart file

| NetCDF restart box info found

| Largest sphere to fit in unit cell has radius = 43.021

| New format PARM file being parsed.

| Version = 1.000 Date = 08/08/17 Time = 03:26:06

Supplementary Text 3

```

NATOM = 108958 NTYPES = 17 NBOH = 104467 MBONA = 4615
NTHETH = 9760 MTHETA = 6270 NPHIH = 20223 MPHIA = 19473
NHPARM = 0 NPARM = 0 NNB = 182012 NRES = 33963
NBONA = 4615 NTHETA = 6270 NPHIA = 19473 NUMBND = 67
NUMANG = 152 NPTRA = 191 NATYP = 36 NPHB = 1
IFBOX = 1 NMXRS = 24 IFCAP = 0 NEXTRA = 0
NCOPY = 0
    
```

```

| Memory Use      Allocated
| Real            8586309
| Hollerith       360839
| Integer         4397980
| Max Pairs       99660250
| nblastReal      1307496
| nblast Int      3585143
| Total           499186 kbytes
    
```

| Note: 1-4 EEL scale factors are being read from the topology file.

| Note: 1-4 VDW scale factors are being read from the topology file.

| Duplicated 0 dihedrals

| Duplicated 0 dihedrals

BOX TYPE: RECTILINEAR

-----  
2. CONTROL DATA FOR THE RUN  
-----

default\_name

General flags:

imin = 1, nmropt = 0

Nature and format of input:

ntx = 1, irest = 0, ntrx = 1

Nature and format of output:

ntxo = 2, ntp = 100, ntrx = 1, ntwr = 1  
iwrap = 0, ntwx = 0, ntwv = 0, ntwe = 0  
ioutfm = 1, ntwprt = 0, idecomp = 0, rbornstat = 0

Potential function:

ntf = 1, ntb = 1, igb = 0, nsnb = 25  
ipol = 0, gbsa = 0, iesp = 0  
dielc = 1.00000, cut = 12.00000, intdiel = 1.00000

Frozen or restrained atoms:

ibelly = 0, ntr = 0

Energy minimization:

maxcyc = 5000, ncyc = 10000, ntmin = 1  
dx0 = 0.01000, drms = 0.00010

### Supplementary Text 3

Ewald parameters:

```
verbose =      0, ew_type =      0, nbflag =      1, use_pme =      1
vdwmeth =      1, eedmeth =      1, netfrnc =      0
Box X = 123.894   Box Y =  86.041   Box Z = 120.804
Alpha =  90.000   Beta  =  90.000   Gamma =  90.000
NFFT1 = 128      NFFT2 =  90      NFFT3 = 120
Cutoff= 12.000   Tol   =0.100E-04
Ewald Coefficient = 0.22664
Interpolation order = 4
```

| INFO: Old style inpcrd file read

---

### 3. ATOMIC COORDINATES AND VELOCITIES

---

default\_name

begin time read from input coords = 0.000 ps

Number of triangulated 3-point waters found: 33386

Sum of charges from parm topology file = -0.00000039  
Forcing neutrality...

---

### 4. RESULTS

---

-----  
APPROXIMATING switch and d/dx switch using CUBIC SPLINE INTERPOLATION  
using 5000.0 points per unit in tabled values

TESTING RELATIVE ERROR over r ranging from 0.0 to cutoff

| CHECK switch(x): max rel err = 0.2738E-14 at 2.422500

| CHECK d/dx switch(x): max rel err = 0.7967E-11 at 2.716640

-----  
| Local SIZE OF NONBOND LIST = 54068725

| TOTAL SIZE OF NONBOND LIST = 54068725

| NSTEP   | ENERGY       | RMS        | GMAX           | NAME      | NUMBER      |
|---------|--------------|------------|----------------|-----------|-------------|
| 1       | -4.0743E+05  | 3.9773E+00 | 2.5249E+02     | OE2       | 2287        |
| BOND    | = 32679.6549 | ANGLE      | = 3821.6131    | DIHED     | = 6769.6726 |
| VDWAALS | = 79544.4577 | EEL        | = -560075.0788 | HBOND     | = 0.0000    |
| 1-4 VDW | = 3206.3674  | 1-4 EEL    | = 26623.1514   | RESTRAINT | = 0.0000    |

| NSTEP   | ENERGY       | RMS        | GMAX           | NAME      | NUMBER      |
|---------|--------------|------------|----------------|-----------|-------------|
| 100     | -4.1967E+05  | 4.3273E-01 | 3.5870E+01     | C         | 7578        |
| BOND    | = 31212.6883 | ANGLE      | = 1635.0353    | DIHED     | = 6674.1253 |
| VDWAALS | = 73765.4432 | EEL        | = -561298.5479 | HBOND     | = 0.0000    |
| 1-4 VDW | = 2242.9987  | 1-4 EEL    | = 26093.3367   | RESTRAINT | = 0.0000    |

Supplementary Text 3

| NSTEP     | ENERGY      | RMS        | GMAX         | NAME        | NUMBER    |
|-----------|-------------|------------|--------------|-------------|-----------|
| 200       | -4.2130E+05 | 5.9209E-01 | 7.9308E+01   | C           | 7276      |
| BOND =    | 31291.4606  | ANGLE =    | 1387.4006    | DIHED =     | 6635.4671 |
| VDWAALS = | 73779.5780  | EEL =      | -562451.5931 | HBOND =     | 0.0000    |
| 1-4 VDW = | 2070.3073   | 1-4 EEL =  | 25983.7068   | RESTRAINT = | 0.0000    |

| NSTEP     | ENERGY      | RMS        | GMAX         | NAME        | NUMBER    |
|-----------|-------------|------------|--------------|-------------|-----------|
| 300       | -4.2227E+05 | 4.9068E-01 | 6.7758E+01   | CE1         | 7690      |
| BOND =    | 31366.6586  | ANGLE =    | 1304.5645    | DIHED =     | 6615.0445 |
| VDWAALS = | 74004.2024  | EEL =      | -563497.4347 | HBOND =     | 0.0000    |
| 1-4 VDW = | 2001.7591   | 1-4 EEL =  | 25938.0316   | RESTRAINT = | 0.0000    |

| NSTEP     | ENERGY      | RMS        | GMAX         | NAME        | NUMBER    |
|-----------|-------------|------------|--------------|-------------|-----------|
| 400       | -4.2300E+05 | 4.5303E-01 | 6.4055E+01   | CE1         | 7690      |
| BOND =    | 31450.7686  | ANGLE =    | 1261.3643    | DIHED =     | 6594.4938 |
| VDWAALS = | 74289.8862  | EEL =      | -564472.8335 | HBOND =     | 0.0000    |
| 1-4 VDW = | 1964.4071   | 1-4 EEL =  | 25910.4399   | RESTRAINT = | 0.0000    |

| NSTEP     | ENERGY      | RMS        | GMAX         | NAME        | NUMBER    |
|-----------|-------------|------------|--------------|-------------|-----------|
| 500       | -4.2363E+05 | 3.7313E-01 | 5.3893E+01   | CE1         | 7690      |
| BOND =    | 31533.0108  | ANGLE =    | 1235.5423    | DIHED =     | 6575.3517 |
| VDWAALS = | 74610.7520  | EEL =      | -565413.6388 | HBOND =     | 0.0000    |
| 1-4 VDW = | 1940.6597   | 1-4 EEL =  | 25892.6224   | RESTRAINT = | 0.0000    |

| NSTEP     | ENERGY      | RMS        | GMAX         | NAME        | NUMBER    |
|-----------|-------------|------------|--------------|-------------|-----------|
| 600       | -4.2416E+05 | 1.5208E-01 | 9.0968E+00   | CE1         | 7690      |
| BOND =    | 31608.1921  | ANGLE =    | 1217.9322    | DIHED =     | 6559.3107 |
| VDWAALS = | 74935.1691  | EEL =      | -566282.2412 | HBOND =     | 0.0000    |
| 1-4 VDW = | 1923.8000   | 1-4 EEL =  | 25878.0264   | RESTRAINT = | 0.0000    |

| NSTEP     | ENERGY      | RMS        | GMAX         | NAME        | NUMBER    |
|-----------|-------------|------------|--------------|-------------|-----------|
| 700       | -4.2465E+05 | 1.4002E-01 | 6.2203E+00   | CE1         | 7690      |
| BOND =    | 31687.5293  | ANGLE =    | 1207.4636    | DIHED =     | 6543.6779 |
| VDWAALS = | 75268.1089  | EEL =      | -567133.1244 | HBOND =     | 0.0000    |
| 1-4 VDW = | 1910.5107   | 1-4 EEL =  | 25864.7429   | RESTRAINT = | 0.0000    |

| NSTEP  | ENERGY      | RMS        | GMAX       | NAME    | NUMBER    |
|--------|-------------|------------|------------|---------|-----------|
| 800    | -4.2510E+05 | 1.3456E-01 | 6.8662E+00 | CE1     | 7690      |
| BOND = | 31764.3137  | ANGLE =    | 1201.0680  | DIHED = | 6532.2066 |

Supplementary Text 3

VDWAALS = 75600.9159 EEL = -567949.6462 HBOND = 0.0000  
 1-4 VDW = 1900.5196 1-4 EEL = 25852.4024 RESTRAINT = 0.0000

NSTEP ENERGY RMS GMAX NAME NUMBER  
 900 -4.2550E+05 5.1118E-01 8.7368E+01 CG 3213

BOND = 31848.9242 ANGLE = 1197.3435 DIHED = 6523.4301  
 VDWAALS = 75925.7816 EEL = -568730.5844 HBOND = 0.0000  
 1-4 VDW = 1892.5964 1-4 EEL = 25840.2627 RESTRAINT = 0.0000

NSTEP ENERGY RMS GMAX NAME NUMBER  
 1000 -4.2589E+05 4.1303E-01 6.6538E+01 CE1 7690

BOND = 31914.9715 ANGLE = 1193.4261 DIHED = 6517.4167  
 VDWAALS = 76232.8797 EEL = -569465.1475 HBOND = 0.0000  
 1-4 VDW = 1886.1382 1-4 EEL = 25830.2818 RESTRAINT = 0.0000

NSTEP ENERGY RMS GMAX NAME NUMBER  
 1100 -4.2625E+05 3.5107E-01 5.5756E+01 CE1 7690

BOND = 31978.8488 ANGLE = 1190.8181 DIHED = 6514.2283  
 VDWAALS = 76531.7913 EEL = -570170.3587 HBOND = 0.0000  
 1-4 VDW = 1880.4536 1-4 EEL = 25821.5084 RESTRAINT = 0.0000

NSTEP ENERGY RMS GMAX NAME NUMBER  
 1200 -4.2660E+05 3.2079E-01 5.0003E+01 CE1 7690

BOND = 32042.4468 ANGLE = 1188.3056 DIHED = 6512.3061  
 VDWAALS = 76824.6566 EEL = -570852.3589 HBOND = 0.0000  
 1-4 VDW = 1875.6007 1-4 EEL = 25813.8819 RESTRAINT = 0.0000

NSTEP ENERGY RMS GMAX NAME NUMBER  
 1300 -4.2691E+05 1.7631E-01 2.3461E+01 CE1 7690

BOND = 32099.0501 ANGLE = 1186.1113 DIHED = 6510.8869  
 VDWAALS = 77101.2724 EEL = -571489.0280 HBOND = 0.0000  
 1-4 VDW = 1871.2346 1-4 EEL = 25806.8266 RESTRAINT = 0.0000

NSTEP ENERGY RMS GMAX NAME NUMBER  
 1400 -4.2721E+05 1.1860E-01 8.1646E+00 CE1 7690

BOND = 32154.5483 ANGLE = 1184.6806 DIHED = 6508.9184  
 VDWAALS = 77362.1524 EEL = -572087.1550 HBOND = 0.0000  
 1-4 VDW = 1867.1360 1-4 EEL = 25800.4805 RESTRAINT = 0.0000

NSTEP ENERGY RMS GMAX NAME NUMBER  
 1500 -4.2749E+05 1.1479E-01 8.5025E+00 CE1 7690

Supplementary Text 3

|         |   |            |         |   |              |           |   |           |
|---------|---|------------|---------|---|--------------|-----------|---|-----------|
| BOND    | = | 32209.0346 | ANGLE   | = | 1183.4895    | DIHED     | = | 6506.9186 |
| VDWAALS | = | 77614.4593 | EEL     | = | -572666.9289 | HBOND     | = | 0.0000    |
| 1-4 VDW | = | 1863.1560  | 1-4 EEL | = | 25795.0427   | RESTRAINT | = | 0.0000    |

|       |             |            |            |      |        |
|-------|-------------|------------|------------|------|--------|
| NSTEP | ENERGY      | RMS        | GMAX       | NAME | NUMBER |
| 1600  | -4.2776E+05 | 4.0384E-01 | 6.2315E+01 | CE1  | 7690   |

|         |   |            |         |   |              |           |   |           |
|---------|---|------------|---------|---|--------------|-----------|---|-----------|
| BOND    | = | 32269.0950 | ANGLE   | = | 1182.8509    | DIHED     | = | 6505.4034 |
| VDWAALS | = | 77855.7131 | EEL     | = | -573226.1031 | HBOND     | = | 0.0000    |
| 1-4 VDW | = | 1859.4422  | 1-4 EEL | = | 25790.2108   | RESTRAINT | = | 0.0000    |

|       |             |            |            |      |        |
|-------|-------------|------------|------------|------|--------|
| NSTEP | ENERGY      | RMS        | GMAX       | NAME | NUMBER |
| 1700  | -4.2803E+05 | 1.0762E-01 | 6.9342E+00 | CE1  | 7690   |

|         |   |            |         |   |              |           |   |           |
|---------|---|------------|---------|---|--------------|-----------|---|-----------|
| BOND    | = | 32311.4581 | ANGLE   | = | 1181.0826    | DIHED     | = | 6503.8729 |
| VDWAALS | = | 78083.4515 | EEL     | = | -573755.1554 | HBOND     | = | 0.0000    |
| 1-4 VDW | = | 1856.2124  | 1-4 EEL | = | 25785.6835   | RESTRAINT | = | 0.0000    |

|       |             |            |            |      |        |
|-------|-------------|------------|------------|------|--------|
| NSTEP | ENERGY      | RMS        | GMAX       | NAME | NUMBER |
| 1800  | -4.2829E+05 | 2.8655E-01 | 4.5459E+01 | CE1  | 7690   |

|         |   |            |         |   |              |           |   |           |
|---------|---|------------|---------|---|--------------|-----------|---|-----------|
| BOND    | = | 32364.4811 | ANGLE   | = | 1180.3382    | DIHED     | = | 6502.2780 |
| VDWAALS | = | 78307.2847 | EEL     | = | -574275.4507 | HBOND     | = | 0.0000    |
| 1-4 VDW | = | 1853.1415  | 1-4 EEL | = | 25781.3818   | RESTRAINT | = | 0.0000    |

|       |             |            |            |      |        |
|-------|-------------|------------|------------|------|--------|
| NSTEP | ENERGY      | RMS        | GMAX       | NAME | NUMBER |
| 1900  | -4.2854E+05 | 1.4462E-01 | 1.7709E+01 | CE1  | 7690   |

|         |   |            |         |   |              |           |   |           |
|---------|---|------------|---------|---|--------------|-----------|---|-----------|
| BOND    | = | 32408.6965 | ANGLE   | = | 1178.8896    | DIHED     | = | 6500.5513 |
| VDWAALS | = | 78517.8045 | EEL     | = | -574771.0444 | HBOND     | = | 0.0000    |
| 1-4 VDW | = | 1850.5270  | 1-4 EEL | = | 25777.5257   | RESTRAINT | = | 0.0000    |

|       |             |            |            |      |        |
|-------|-------------|------------|------------|------|--------|
| NSTEP | ENERGY      | RMS        | GMAX       | NAME | NUMBER |
| 2000  | -4.2878E+05 | 1.0300E-01 | 6.1988E+00 | CE1  | 7690   |

|         |   |            |         |   |              |           |   |           |
|---------|---|------------|---------|---|--------------|-----------|---|-----------|
| BOND    | = | 32453.6414 | ANGLE   | = | 1177.4678    | DIHED     | = | 6499.1494 |
| VDWAALS | = | 78720.5513 | EEL     | = | -575252.4661 | HBOND     | = | 0.0000    |
| 1-4 VDW | = | 1848.1772  | 1-4 EEL | = | 25773.9781   | RESTRAINT | = | 0.0000    |

|       |             |            |            |      |        |
|-------|-------------|------------|------------|------|--------|
| NSTEP | ENERGY      | RMS        | GMAX       | NAME | NUMBER |
| 2100  | -4.2902E+05 | 1.0659E-01 | 7.8688E+00 | CE1  | 7690   |

|         |   |            |         |   |              |           |   |           |
|---------|---|------------|---------|---|--------------|-----------|---|-----------|
| BOND    | = | 32498.4418 | ANGLE   | = | 1176.0866    | DIHED     | = | 6498.1178 |
| VDWAALS | = | 78920.8095 | EEL     | = | -575729.2338 | HBOND     | = | 0.0000    |
| 1-4 VDW | = | 1846.1438  | 1-4 EEL | = | 25770.5828   | RESTRAINT | = | 0.0000    |

## Supplementary Text 3

| NSTEP | ENERGY      | RMS        | GMAX       | NAME | NUMBER |
|-------|-------------|------------|------------|------|--------|
| 2200  | -4.2925E+05 | 1.1979E-01 | 1.2721E+01 | CE1  | 7690   |

|           |            |           |              |             |           |
|-----------|------------|-----------|--------------|-------------|-----------|
| BOND =    | 32541.5566 | ANGLE =   | 1175.0323    | DIHED =     | 6497.0650 |
| VDWAALS = | 79111.7229 | EEL =     | -576186.0845 | HBOND =     | 0.0000    |
| 1-4 VDW = | 1844.2957  | 1-4 EEL = | 25767.2633   | RESTRAINT = | 0.0000    |

| NSTEP | ENERGY      | RMS        | GMAX       | NAME | NUMBER |
|-------|-------------|------------|------------|------|--------|
| 2300  | -4.2947E+05 | 3.3339E-01 | 5.1576E+01 | CE1  | 7690   |

|           |            |           |              |             |           |
|-----------|------------|-----------|--------------|-------------|-----------|
| BOND =    | 32588.0814 | ANGLE =   | 1174.5852    | DIHED =     | 6496.1196 |
| VDWAALS = | 79296.2536 | EEL =     | -576628.6575 | HBOND =     | 0.0000    |
| 1-4 VDW = | 1842.5833  | 1-4 EEL = | 25764.1456   | RESTRAINT = | 0.0000    |

| NSTEP | ENERGY      | RMS        | GMAX       | NAME | NUMBER |
|-------|-------------|------------|------------|------|--------|
| 2400  | -4.2969E+05 | 2.7617E-01 | 4.3559E+01 | CE1  | 7690   |

|           |            |           |              |             |           |
|-----------|------------|-----------|--------------|-------------|-----------|
| BOND =    | 32627.8686 | ANGLE =   | 1173.7630    | DIHED =     | 6495.2764 |
| VDWAALS = | 79479.0684 | EEL =     | -577067.7093 | HBOND =     | 0.0000    |
| 1-4 VDW = | 1841.1437  | 1-4 EEL = | 25760.9855   | RESTRAINT = | 0.0000    |

| NSTEP | ENERGY      | RMS        | GMAX       | NAME | NUMBER |
|-------|-------------|------------|------------|------|--------|
| 2500  | -4.2991E+05 | 2.4414E-01 | 3.3957E+01 | CE1  | 7690   |

|           |            |           |              |             |           |
|-----------|------------|-----------|--------------|-------------|-----------|
| BOND =    | 32668.1947 | ANGLE =   | 1172.9840    | DIHED =     | 6494.3507 |
| VDWAALS = | 79656.8698 | EEL =     | -577499.4681 | HBOND =     | 0.0000    |
| 1-4 VDW = | 1839.6328  | 1-4 EEL = | 25757.8188   | RESTRAINT = | 0.0000    |

| NSTEP | ENERGY      | RMS        | GMAX       | NAME | NUMBER |
|-------|-------------|------------|------------|------|--------|
| 2600  | -4.3012E+05 | 1.3717E-01 | 1.6617E+01 | CE1  | 7690   |

|           |            |           |              |             |           |
|-----------|------------|-----------|--------------|-------------|-----------|
| BOND =    | 32705.3280 | ANGLE =   | 1172.2101    | DIHED =     | 6493.0949 |
| VDWAALS = | 79822.3487 | EEL =     | -577907.6119 | HBOND =     | 0.0000    |
| 1-4 VDW = | 1838.3512  | 1-4 EEL = | 25754.8170   | RESTRAINT = | 0.0000    |

| NSTEP | ENERGY      | RMS        | GMAX       | NAME | NUMBER |
|-------|-------------|------------|------------|------|--------|
| 2700  | -4.3033E+05 | 1.0044E-01 | 7.6430E+00 | CE1  | 7690   |

|           |            |           |              |             |           |
|-----------|------------|-----------|--------------|-------------|-----------|
| BOND =    | 32743.0278 | ANGLE =   | 1171.6378    | DIHED =     | 6491.7219 |
| VDWAALS = | 79980.1719 | EEL =     | -578303.3298 | HBOND =     | 0.0000    |
| 1-4 VDW = | 1837.0237  | 1-4 EEL = | 25752.0809   | RESTRAINT = | 0.0000    |

| NSTEP | ENERGY      | RMS        | GMAX       | NAME | NUMBER |
|-------|-------------|------------|------------|------|--------|
| 2800  | -4.3053E+05 | 3.8553E-01 | 7.7209E+01 | CG   | 3213   |

|           |            |           |              |             |           |
|-----------|------------|-----------|--------------|-------------|-----------|
| BOND =    | 32788.1055 | ANGLE =   | 1171.6400    | DIHED =     | 6490.2029 |
| VDWAALS = | 80136.0177 | EEL =     | -578699.0928 | HBOND =     | 0.0000    |
| 1-4 VDW = | 1835.5900  | 1-4 EEL = | 25749.6499   | RESTRAINT = | 0.0000    |

Supplementary Text 3

| NSTEP     | ENERGY      | RMS        | GMAX         | NAME        | NUMBER    |
|-----------|-------------|------------|--------------|-------------|-----------|
| 2900      | -4.3073E+05 | 3.2051E-01 | 4.9022E+01   | CE1         | 7690      |
| BOND =    | 32823.3959  | ANGLE =    | 1171.0376    | DIHED =     | 6488.4719 |
| VDWAALS = | 80284.2560  | EEL =      | -579079.1115 | HBOND =     | 0.0000    |
| 1-4 VDW = | 1834.3608   | 1-4 EEL =  | 25747.2164   | RESTRAINT = | 0.0000    |

| NSTEP     | ENERGY      | RMS        | GMAX         | NAME        | NUMBER    |
|-----------|-------------|------------|--------------|-------------|-----------|
| 3000      | -4.3093E+05 | 2.6854E-01 | 4.2445E+01   | CE1         | 7690      |
| BOND =    | 32857.7391  | ANGLE =    | 1170.5752    | DIHED =     | 6486.7037 |
| VDWAALS = | 80424.2435  | EEL =      | -579442.7223 | HBOND =     | 0.0000    |
| 1-4 VDW = | 1833.0532   | 1-4 EEL =  | 25744.9564   | RESTRAINT = | 0.0000    |

| NSTEP     | ENERGY      | RMS        | GMAX         | NAME        | NUMBER    |
|-----------|-------------|------------|--------------|-------------|-----------|
| 3100      | -4.3112E+05 | 2.4035E-01 | 3.7521E+01   | CE1         | 7690      |
| BOND =    | 32893.1967  | ANGLE =    | 1169.6927    | DIHED =     | 6485.2343 |
| VDWAALS = | 80561.7306  | EEL =      | -579806.3702 | HBOND =     | 0.0000    |
| 1-4 VDW = | 1831.8022   | 1-4 EEL =  | 25743.5336   | RESTRAINT = | 0.0000    |

| NSTEP     | ENERGY      | RMS        | GMAX         | NAME        | NUMBER    |
|-----------|-------------|------------|--------------|-------------|-----------|
| 3200      | -4.3132E+05 | 1.4333E-01 | 1.8055E+01   | CE1         | 7690      |
| BOND =    | 32927.3349  | ANGLE =    | 1168.2806    | DIHED =     | 6484.6351 |
| VDWAALS = | 80697.6263  | EEL =      | -580167.9301 | HBOND =     | 0.0000    |
| 1-4 VDW = | 1830.6338   | 1-4 EEL =  | 25742.4137   | RESTRAINT = | 0.0000    |

| NSTEP     | ENERGY      | RMS        | GMAX         | NAME        | NUMBER    |
|-----------|-------------|------------|--------------|-------------|-----------|
| 3300      | -4.3151E+05 | 9.7663E-02 | 7.8731E+00   | CE1         | 7690      |
| BOND =    | 32962.0136  | ANGLE =    | 1167.3962    | DIHED =     | 6483.6509 |
| VDWAALS = | 80830.0793  | EEL =      | -580519.2542 | HBOND =     | 0.0000    |
| 1-4 VDW = | 1829.7813   | 1-4 EEL =  | 25741.3101   | RESTRAINT = | 0.0000    |

| NSTEP     | ENERGY      | RMS        | GMAX         | NAME        | NUMBER    |
|-----------|-------------|------------|--------------|-------------|-----------|
| 3400      | -4.3169E+05 | 1.0844E-01 | 1.1271E+01   | CE1         | 7690      |
| BOND =    | 32998.2332  | ANGLE =    | 1166.8887    | DIHED =     | 6481.9417 |
| VDWAALS = | 80966.9609  | EEL =      | -580876.7537 | HBOND =     | 0.0000    |
| 1-4 VDW = | 1829.0472   | 1-4 EEL =  | 25740.2841   | RESTRAINT = | 0.0000    |

| NSTEP  | ENERGY      | RMS        | GMAX       | NAME    | NUMBER    |
|--------|-------------|------------|------------|---------|-----------|
| 3500   | -4.3188E+05 | 9.6518E-02 | 7.8744E+00 | CE1     | 7690      |
| BOND = | 33034.5426  | ANGLE =    | 1166.4964  | DIHED = | 6480.1533 |



Supplementary Text 3

VDWAALS = 81107.6123 EEL = -581234.8831 HBOND = 0.0000  
 1-4 VDW = 1828.4030 1-4 EEL = 25739.4789 RESTRAINT = 0.0000

NSTEP ENERGY RMS GMAX NAME NUMBER  
 3600 -4.3205E+05 2.5875E-01 3.8888E+01 CE1 7690

BOND = 33073.7323 ANGLE = 1166.4610 DIHED = 6478.7013  
 VDWAALS = 81249.5737 EEL = -581587.8405 HBOND = 0.0000  
 1-4 VDW = 1827.7786 1-4 EEL = 25738.8230 RESTRAINT = 0.0000

NSTEP ENERGY RMS GMAX NAME NUMBER  
 3700 -4.3223E+05 2.3593E-01 3.5061E+01 CE1 7690

BOND = 33109.2388 ANGLE = 1166.3445 DIHED = 6477.7481  
 VDWAALS = 81391.6173 EEL = -581936.8626 HBOND = 0.0000  
 1-4 VDW = 1827.1398 1-4 EEL = 25737.9213 RESTRAINT = 0.0000

NSTEP ENERGY RMS GMAX NAME NUMBER  
 3800 -4.3240E+05 1.4182E-01 1.7990E+01 CE1 7690

BOND = 33142.9129 ANGLE = 1166.2205 DIHED = 6477.1349  
 VDWAALS = 81532.0803 EEL = -582277.2856 HBOND = 0.0000  
 1-4 VDW = 1826.5301 1-4 EEL = 25737.2001 RESTRAINT = 0.0000

NSTEP ENERGY RMS GMAX NAME NUMBER  
 3900 -4.3256E+05 1.5320E-01 2.0595E+01 CE1 7690

BOND = 33177.9969 ANGLE = 1166.5085 DIHED = 6476.7605  
 VDWAALS = 81672.2008 EEL = -582612.6009 HBOND = 0.0000  
 1-4 VDW = 1825.8607 1-4 EEL = 25736.2611 RESTRAINT = 0.0000

NSTEP ENERGY RMS GMAX NAME NUMBER  
 4000 -4.3271E+05 7.9563E-02 3.3188E+00 CE1 7690

BOND = 33211.0011 ANGLE = 1166.6319 DIHED = 6476.3850  
 VDWAALS = 81808.8036 EEL = -582936.2866 HBOND = 0.0000  
 1-4 VDW = 1825.2025 1-4 EEL = 25735.3734 RESTRAINT = 0.0000

NSTEP ENERGY RMS GMAX NAME NUMBER  
 4100 -4.3286E+05 3.3584E-01 1.0048E+02 CG 3213

BOND = 33249.1173 ANGLE = 1167.2749 DIHED = 6476.0080  
 VDWAALS = 81944.1824 EEL = -583255.5236 HBOND = 0.0000  
 1-4 VDW = 1824.4520 1-4 EEL = 25734.6292 RESTRAINT = 0.0000

NSTEP ENERGY RMS GMAX NAME NUMBER  
 4200 -4.3301E+05 2.3594E-01 3.2671E+01 CE1 7690

Supplementary Text 3

|         |   |            |         |   |              |           |   |           |
|---------|---|------------|---------|---|--------------|-----------|---|-----------|
| BOND    | = | 33278.9146 | ANGLE   | = | 1167.5729    | DIHED     | = | 6475.7748 |
| VDWAALS | = | 82075.6547 | EEL     | = | -583562.5531 | HBOND     | = | 0.0000    |
| 1-4 VDW | = | 1823.8053  | 1-4 EEL | = | 25733.3468   | RESTRAINT | = | 0.0000    |

|       |             |            |            |      |        |
|-------|-------------|------------|------------|------|--------|
| NSTEP | ENERGY      | RMS        | GMAX       | NAME | NUMBER |
| 4300  | -4.3315E+05 | 2.3575E-01 | 3.3055E+01 | CG   | 3213   |

|         |   |            |         |   |              |           |   |           |
|---------|---|------------|---------|---|--------------|-----------|---|-----------|
| BOND    | = | 33310.3633 | ANGLE   | = | 1167.7409    | DIHED     | = | 6475.6843 |
| VDWAALS | = | 82205.2476 | EEL     | = | -583864.5727 | HBOND     | = | 0.0000    |
| 1-4 VDW | = | 1823.2308  | 1-4 EEL | = | 25732.3246   | RESTRAINT | = | 0.0000    |

|       |             |            |            |      |        |
|-------|-------------|------------|------------|------|--------|
| NSTEP | ENERGY      | RMS        | GMAX       | NAME | NUMBER |
| 4400  | -4.3329E+05 | 1.8235E-01 | 2.2265E+01 | CE1  | 7690   |

|         |   |            |         |   |              |           |   |           |
|---------|---|------------|---------|---|--------------|-----------|---|-----------|
| BOND    | = | 33340.1505 | ANGLE   | = | 1168.1683    | DIHED     | = | 6475.7611 |
| VDWAALS | = | 82332.4773 | EEL     | = | -584160.2654 | HBOND     | = | 0.0000    |
| 1-4 VDW | = | 1822.5187  | 1-4 EEL | = | 25731.0794   | RESTRAINT | = | 0.0000    |

|       |             |            |            |      |        |
|-------|-------------|------------|------------|------|--------|
| NSTEP | ENERGY      | RMS        | GMAX       | NAME | NUMBER |
| 4500  | -4.3342E+05 | 1.5117E-01 | 1.7610E+01 | CE1  | 7690   |

|         |   |            |         |   |              |           |   |           |
|---------|---|------------|---------|---|--------------|-----------|---|-----------|
| BOND    | = | 33369.3467 | ANGLE   | = | 1168.1790    | DIHED     | = | 6475.8601 |
| VDWAALS | = | 82455.7767 | EEL     | = | -584445.3600 | HBOND     | = | 0.0000    |
| 1-4 VDW | = | 1821.9624  | 1-4 EEL | = | 25729.7881   | RESTRAINT | = | 0.0000    |

|       |             |            |            |      |        |
|-------|-------------|------------|------------|------|--------|
| NSTEP | ENERGY      | RMS        | GMAX       | NAME | NUMBER |
| 4600  | -4.3356E+05 | 7.6819E-02 | 3.8025E+00 | CG   | 3213   |

|         |   |            |         |   |              |           |   |           |
|---------|---|------------|---------|---|--------------|-----------|---|-----------|
| BOND    | = | 33397.2927 | ANGLE   | = | 1168.3381    | DIHED     | = | 6475.7621 |
| VDWAALS | = | 82575.6560 | EEL     | = | -584723.2739 | HBOND     | = | 0.0000    |
| 1-4 VDW | = | 1821.3715  | 1-4 EEL | = | 25728.1632   | RESTRAINT | = | 0.0000    |

|       |             |            |            |      |        |
|-------|-------------|------------|------------|------|--------|
| NSTEP | ENERGY      | RMS        | GMAX       | NAME | NUMBER |
| 4700  | -4.3369E+05 | 8.8181E-02 | 7.0531E+00 | NE2  | 8655   |

|         |   |            |         |   |              |           |   |           |
|---------|---|------------|---------|---|--------------|-----------|---|-----------|
| BOND    | = | 33425.2658 | ANGLE   | = | 1168.4641    | DIHED     | = | 6474.2225 |
| VDWAALS | = | 82691.2285 | EEL     | = | -584992.9022 | HBOND     | = | 0.0000    |
| 1-4 VDW | = | 1820.8578  | 1-4 EEL | = | 25726.4283   | RESTRAINT | = | 0.0000    |

|       |             |            |            |      |        |
|-------|-------------|------------|------------|------|--------|
| NSTEP | ENERGY      | RMS        | GMAX       | NAME | NUMBER |
| 4800  | -4.3381E+05 | 7.5012E-02 | 3.6977E+00 | NE2  | 8655   |

|         |   |            |         |   |              |           |   |           |
|---------|---|------------|---------|---|--------------|-----------|---|-----------|
| BOND    | = | 33452.1764 | ANGLE   | = | 1168.6809    | DIHED     | = | 6472.8166 |
| VDWAALS | = | 82802.4675 | EEL     | = | -585254.9780 | HBOND     | = | 0.0000    |
| 1-4 VDW | = | 1820.3536  | 1-4 EEL | = | 25724.6591   | RESTRAINT | = | 0.0000    |

Supplementary Text 3

| NSTEP     | ENERGY      | RMS        | GMAX         | NAME        | NUMBER    |
|-----------|-------------|------------|--------------|-------------|-----------|
| 4900      | -4.3394E+05 | 2.0032E-01 | 2.6049E+01   | NE2         | 8655      |
| BOND =    | 33480.3896  | ANGLE =    | 1169.2780    | DIHED =     | 6472.1110 |
| VDWAALS = | 82910.9901  | EEL =      | -585514.6411 | HBOND =     | 0.0000    |
| 1-4 VDW = | 1819.8707   | 1-4 EEL =  | 25722.8852   | RESTRAINT = | 0.0000    |

| NSTEP     | ENERGY      | RMS        | GMAX         | NAME        | NUMBER    |
|-----------|-------------|------------|--------------|-------------|-----------|
| 5000      | -4.3407E+05 | 1.7436E-01 | 2.3542E+01   | NE2         | 8655      |
| BOND =    | 33506.0853  | ANGLE =    | 1169.2249    | DIHED =     | 6471.6103 |
| VDWAALS = | 83017.0209  | EEL =      | -585770.2257 | HBOND =     | 0.0000    |
| 1-4 VDW = | 1819.4910   | 1-4 EEL =  | 25721.3021   | RESTRAINT = | 0.0000    |

Maximum number of minimization cycles reached.

FINAL RESULTS

| NSTEP     | ENERGY      | RMS        | GMAX         | NAME        | NUMBER    |
|-----------|-------------|------------|--------------|-------------|-----------|
| 5000      | -4.3407E+05 | 1.7436E-01 | 2.3542E+01   | NE2         | 8655      |
| BOND =    | 33506.0853  | ANGLE =    | 1169.2249    | DIHED =     | 6471.6103 |
| VDWAALS = | 83017.0209  | EEL =      | -585770.2257 | HBOND =     | 0.0000    |
| 1-4 VDW = | 1819.4910   | 1-4 EEL =  | 25721.3021   | RESTRAINT = | 0.0000    |

5. TIMINGS

|                     |                            |
|---------------------|----------------------------|
| Build the list      | 22.81 (88.24% of List )    |
| Other               | 3.04 (11.76% of List )     |
| List time           | 25.85 ( 0.25% of Nonbo)    |
| Short_ene time      | 9466.54 (99.66% of Direc)  |
| Other               | 31.99 ( 0.34% of Direc)    |
| Direct Ewald time   | 9498.53 (91.70% of Ewald)  |
| Adjust Ewald time   | 35.33 ( 0.34% of Ewald)    |
| Fill Bspline coeffs | 27.74 ( 3.39% of Recip)    |
| Fill charge grid    | 120.27 (14.71% of Recip)   |
| Scalar sum          | 155.67 (19.04% of Recip)   |
| Grad sum            | 205.51 (25.14% of Recip)   |
| FFT time            | 308.22 (37.71% of Recip)   |
| Recip Ewald time    | 817.42 ( 7.89% of Ewald)   |
| Virial junk         | 2.34 ( 0.02% of Ewald)     |
| Other               | 5.12 ( 0.05% of Ewald)     |
| Ewald time          | 10358.76 (99.75% of Nonbo) |
| Nonbond force       | 10384.62 (99.51% of Force) |
| Bond/Angle/Dihedral | 50.22 ( 0.48% of Force)    |
| Other               | 1.38 ( 0.01% of Force)     |
| Force time          | 10436.22 (100.0% of Runmd) |

Supplementary Text 3

```
| Runmd Time          10436.22 (99.71% of Total)
| Other                30.36 ( 0.29% of Total)
| Total time          10466.62 (100.0% of ALL )
```

```
| Number of list builds :          14
```

```
| Highest rstack allocated: 5837340
| Highest ystack allocated: 108958
|           Job began at 00:51:42.048 on 08/13/2017
|           Setup done at 00:51:43.000 on 08/13/2017
|           Run done at 03:46:08.665 on 08/13/2017
| wallclock() was called 190076 times
```

-----  
Amber 16 SANDER

2016  
-----

```
| Run on 08/14/2017 at 01:34:10
```

```
| Executable path: /usr/local/amber16/bin/sander
| Working directory: /Users/Swati
| Hostname: Unknown
| [-O]verwriting output
```

File Assignments:

```
| MDIN: minimization_file_2.in
| MDOUT: LJP6_min3_2.out
| INPCRD: LJP6_min3_1.rst
| PARM: /Users/Swati/LJP6_files/LJP6.prmtop
| RESTRT: LJP6_min3_2.rst
| REFC: refc
| MDVEL: mdvel
| MDFRC: mdfrc
| MDEN: mden
| MDCRD: mdcrd
| MDINFO: mdinfo
| MTMD: mtmd
| INPDIP: inp dip
| RSTDIP: rst dip
| INPTRAJ: inp traj
```

Here is the input file:

```
PROT: minimization_2
&cntrl
imin = 1,
maxcyc = 5000,
ncyc = 10000,
igb = 0,
ntpr = 100,
ntp = 0
cut = 12
&end
```

### Supplementary Text 3

---

#### 1. RESOURCE USE:

---

| Flags:  
| getting box info from netcdf restart file  
| NetCDF restart box info found  
| Largest sphere to fit in unit cell has radius = 44.819  
| New format PARM file being parsed.  
| Version = 1.000 Date = 08/06/17 Time = 07:17:45  
| NATOM = 107805 NTYPES = 17 NBONH = 103425 MBONA = 4491  
| NTHETH = 9523 MTHETA = 6101 NPHIH = 19785 MPHIA = 18920  
| NHPARM = 0 NPARM = 0 NNB = 179511 NRES = 33643  
| NBONA = 4491 NTHETA = 6101 NPHIA = 18920 NUMBND = 67  
| NUMANG = 152 NPTRA = 191 NATYP = 36 NPHB = 1  
| IFBOX = 1 NMXRS = 24 IFCAP = 0 NEXTRA = 0  
| NCOPY = 0

| Memory Use | Allocated     |
|------------|---------------|
| Real       | 8496271       |
| Hollerith  | 357060        |
| Integer    | 4323872       |
| Max Pairs  | 98605640      |
| nblastReal | 1293660       |
| nblast Int | 3573335       |
| Total      | 493905 kbytes |

| Note: 1-4 EEL scale factors are being read from the topology file.

| Note: 1-4 VDW scale factors are being read from the topology file.

| Duplicated 0 dihedrals  
| Duplicated 0 dihedrals

BOX TYPE: RECTILINEAR

---

#### 2. CONTROL DATA FOR THE RUN

---

default\_name

General flags:

imin = 1, nmropt = 0

Nature and format of input:

ntx = 1, irest = 0, ntrx = 1

Nature and format of output:

ntxo = 2, ntrp = 100, ntrx = 1, ntwr = 1  
iwrap = 0, ntwx = 0, ntwv = 0, ntwe = 0  
ioutfm = 1, ntwprt = 0, idecomp = 0, rbornstat= 0

### Supplementary Text 3

#### Potential function:

```
ntf      =      1, ntb      =      1, igb      =      0, nsnb      =      25
ipol     =      0, gbsa     =      0, iesp     =      0
dielc    =  1.00000, cut     = 12.00000, intdiel =  1.00000
```

#### Frozen or restrained atoms:

```
ibelly   =      0, ntr     =      0
```

#### Energy minimization:

```
maxcyc   =  5000, ncyd    = 10000, ntmin    =      1
dx0      =  0.01000, drms  =  0.00010
```

#### Ewald parameters:

```
verbose  =      0, ew_type =      0, nbflag   =      1, use_pme  =      1
vdwmeth  =      1, eedmeth =      1, netfrd   =      0
Box X    = 117.910  Box Y    =  89.637  Box Z    = 121.218
Alpha    =  90.000  Beta    =  90.000  Gamma    =  90.000
NFFT1    = 120     NFFT2    =  90     NFFT3    = 125
Cutoff   = 12.000  Tol     =0.100E-04
Ewald Coefficient =  0.22664
Interpolation order =  4
```

| INFO: Old style inpcrd file read

---

### 3. ATOMIC COORDINATES AND VELOCITIES

---

#### default\_name

```
begin time read from input coords =  0.000 ps
```

```
Number of triangulated 3-point waters found:  33071
```

```
Sum of charges from parm topology file = -0.00000035
Forcing neutrality...
```

---

### 4. RESULTS

---

```
-----
APPROXIMATING switch and d/dx switch using CUBIC SPLINE INTERPOLATION
using 5000.0 points per unit in tabled values
TESTING RELATIVE ERROR over r ranging from 0.0 to cutoff
| CHECK switch(x): max rel err =  0.2738E-14  at  2.422500
| CHECK d/dx switch(x): max rel err =  0.7967E-11  at  2.716640
-----
```

```
| Local SIZE OF NONBOND LIST =  53314213
| TOTAL SIZE OF NONBOND LIST =  53314213
```

| NSTEP | ENERGY      | RMS        | GMAX       | NAME | NUMBER |
|-------|-------------|------------|------------|------|--------|
| 1     | -4.0036E+05 | 4.7605E+00 | 7.0995E+02 | C    | 3792   |

Supplementary Text 3

|         |   |            |         |   |              |           |   |           |
|---------|---|------------|---------|---|--------------|-----------|---|-----------|
| BOND    | = | 40159.1664 | ANGLE   | = | 4173.9815    | DIHED     | = | 6614.0321 |
| VDWAALS | = | 78057.3200 | EEL     | = | -556195.6061 | HBOND     | = | 0.0000    |
| 1-4 VDW | = | 2790.3026  | 1-4 EEL | = | 24042.2383   | RESTRAINT | = | 0.0000    |

|       |             |            |            |      |        |
|-------|-------------|------------|------------|------|--------|
| NSTEP | ENERGY      | RMS        | GMAX       | NAME | NUMBER |
| 100   | -4.1752E+05 | 4.2203E-01 | 7.5970E+01 | N    | 3794   |

|         |   |            |         |   |              |           |   |           |
|---------|---|------------|---------|---|--------------|-----------|---|-----------|
| BOND    | = | 32073.8265 | ANGLE   | = | 1993.4333    | DIHED     | = | 6519.7751 |
| VDWAALS | = | 73667.5498 | EEL     | = | -557327.3895 | HBOND     | = | 0.0000    |
| 1-4 VDW | = | 2081.6286  | 1-4 EEL | = | 23468.1826   | RESTRAINT | = | 0.0000    |

|       |             |            |            |      |        |
|-------|-------------|------------|------------|------|--------|
| NSTEP | ENERGY      | RMS        | GMAX       | NAME | NUMBER |
| 200   | -4.1948E+05 | 5.9705E-01 | 1.3145E+02 | C    | 3812   |

|         |   |            |         |   |              |           |   |           |
|---------|---|------------|---------|---|--------------|-----------|---|-----------|
| BOND    | = | 31640.3039 | ANGLE   | = | 1666.7976    | DIHED     | = | 6482.3217 |
| VDWAALS | = | 73787.2375 | EEL     | = | -558374.2134 | HBOND     | = | 0.0000    |
| 1-4 VDW | = | 1947.5960  | 1-4 EEL | = | 23368.2252   | RESTRAINT | = | 0.0000    |

|       |             |            |            |      |        |
|-------|-------------|------------|------------|------|--------|
| NSTEP | ENERGY      | RMS        | GMAX       | NAME | NUMBER |
| 300   | -4.2058E+05 | 5.2360E-01 | 9.5490E+01 | C    | 3812   |

|         |   |            |         |   |              |           |   |           |
|---------|---|------------|---------|---|--------------|-----------|---|-----------|
| BOND    | = | 31530.7177 | ANGLE   | = | 1521.5410    | DIHED     | = | 6459.1489 |
| VDWAALS | = | 74055.1402 | EEL     | = | -559374.4469 | HBOND     | = | 0.0000    |
| 1-4 VDW | = | 1890.2184  | 1-4 EEL | = | 23335.6818   | RESTRAINT | = | 0.0000    |

|       |             |            |            |      |        |
|-------|-------------|------------|------------|------|--------|
| NSTEP | ENERGY      | RMS        | GMAX       | NAME | NUMBER |
| 400   | -4.2135E+05 | 4.2680E-01 | 9.1233E+01 | C    | 3812   |

|         |   |            |         |   |              |           |   |           |
|---------|---|------------|---------|---|--------------|-----------|---|-----------|
| BOND    | = | 31501.2383 | ANGLE   | = | 1447.0847    | DIHED     | = | 6442.6834 |
| VDWAALS | = | 74359.0674 | EEL     | = | -560290.1587 | HBOND     | = | 0.0000    |
| 1-4 VDW | = | 1860.7054  | 1-4 EEL | = | 23326.2782   | RESTRAINT | = | 0.0000    |

|       |             |            |            |      |        |
|-------|-------------|------------|------------|------|--------|
| NSTEP | ENERGY      | RMS        | GMAX       | NAME | NUMBER |
| 500   | -4.2196E+05 | 2.8243E-01 | 4.8215E+01 | CD   | 3230   |

|         |   |            |         |   |              |           |   |           |
|---------|---|------------|---------|---|--------------|-----------|---|-----------|
| BOND    | = | 31526.1727 | ANGLE   | = | 1388.3608    | DIHED     | = | 6431.1022 |
| VDWAALS | = | 74667.2365 | EEL     | = | -561135.3787 | HBOND     | = | 0.0000    |
| 1-4 VDW | = | 1842.8537  | 1-4 EEL | = | 23320.2571   | RESTRAINT | = | 0.0000    |

|       |             |            |            |      |        |
|-------|-------------|------------|------------|------|--------|
| NSTEP | ENERGY      | RMS        | GMAX       | NAME | NUMBER |
| 600   | -4.2247E+05 | 2.2774E-01 | 4.4242E+01 | C    | 3812   |

|         |   |            |         |   |              |           |   |           |
|---------|---|------------|---------|---|--------------|-----------|---|-----------|
| BOND    | = | 31561.8449 | ANGLE   | = | 1356.3709    | DIHED     | = | 6423.0452 |
| VDWAALS | = | 74973.5376 | EEL     | = | -561927.1480 | HBOND     | = | 0.0000    |
| 1-4 VDW | = | 1830.9076  | 1-4 EEL | = | 23316.3241   | RESTRAINT | = | 0.0000    |

## Supplementary Text 3

| NSTEP     | ENERGY      | RMS        | GMAX         | NAME        | NUMBER    |
|-----------|-------------|------------|--------------|-------------|-----------|
| 700       | -4.2290E+05 | 1.4834E-01 | 1.5758E+01   | C           | 3812      |
| BOND =    | 31611.3304  | ANGLE =    | 1331.0660    | DIHED =     | 6415.5626 |
| VDWAALS = | 75269.2559  | EEL =      | -562665.9996 | HBOND =     | 0.0000    |
| 1-4 VDW = | 1821.9016   | 1-4 EEL =  | 23313.2512   | RESTRAINT = | 0.0000    |

| NSTEP     | ENERGY      | RMS        | GMAX         | NAME        | NUMBER    |
|-----------|-------------|------------|--------------|-------------|-----------|
| 800       | -4.2330E+05 | 1.3579E-01 | 1.2911E+01   | C           | 3812      |
| BOND =    | 31663.3559  | ANGLE =    | 1315.7513    | DIHED =     | 6409.5776 |
| VDWAALS = | 75566.3926  | EEL =      | -563384.5002 | HBOND =     | 0.0000    |
| 1-4 VDW = | 1814.9841   | 1-4 EEL =  | 23309.8510   | RESTRAINT = | 0.0000    |

| NSTEP     | ENERGY      | RMS        | GMAX         | NAME        | NUMBER    |
|-----------|-------------|------------|--------------|-------------|-----------|
| 900       | -4.2367E+05 | 4.8981E-01 | 8.8835E+01   | C           | 3812      |
| BOND =    | 31726.4121  | ANGLE =    | 1307.2666    | DIHED =     | 6403.8369 |
| VDWAALS = | 75869.7140  | EEL =      | -564093.4667 | HBOND =     | 0.0000    |
| 1-4 VDW = | 1809.5157   | 1-4 EEL =  | 23307.7011   | RESTRAINT = | 0.0000    |

| NSTEP     | ENERGY      | RMS        | GMAX         | NAME        | NUMBER    |
|-----------|-------------|------------|--------------|-------------|-----------|
| 1000      | -4.2401E+05 | 4.4153E-01 | 9.6354E+01   | CD          | 3230      |
| BOND =    | 31785.5620  | ANGLE =    | 1292.2703    | DIHED =     | 6398.9747 |
| VDWAALS = | 76158.5055  | EEL =      | -564755.3911 | HBOND =     | 0.0000    |
| 1-4 VDW = | 1805.6116   | 1-4 EEL =  | 23307.8694   | RESTRAINT = | 0.0000    |

| NSTEP     | ENERGY      | RMS        | GMAX         | NAME        | NUMBER    |
|-----------|-------------|------------|--------------|-------------|-----------|
| 1100      | -4.2431E+05 | 3.4125E-01 | 6.4933E+01   | C           | 3812      |
| BOND =    | 31832.1085  | ANGLE =    | 1283.9429    | DIHED =     | 6397.6308 |
| VDWAALS = | 76428.8077  | EEL =      | -565368.5764 | HBOND =     | 0.0000    |
| 1-4 VDW = | 1802.1439   | 1-4 EEL =  | 23309.2388   | RESTRAINT = | 0.0000    |

| NSTEP     | ENERGY      | RMS        | GMAX         | NAME        | NUMBER    |
|-----------|-------------|------------|--------------|-------------|-----------|
| 1200      | -4.2462E+05 | 3.0420E-01 | 4.9586E+01   | CZ          | 3806      |
| BOND =    | 31889.3631  | ANGLE =    | 1225.7687    | DIHED =     | 6411.5608 |
| VDWAALS = | 76685.4536  | EEL =      | -565954.2588 | HBOND =     | 0.0000    |
| 1-4 VDW = | 1799.1220   | 1-4 EEL =  | 23319.3490   | RESTRAINT = | 0.0000    |

| NSTEP     | ENERGY      | RMS        | GMAX         | NAME        | NUMBER    |
|-----------|-------------|------------|--------------|-------------|-----------|
| 1300      | -4.2491E+05 | 1.9717E-01 | 3.1292E+01   | CE2         | 3808      |
| BOND =    | 31937.1838  | ANGLE =    | 1204.2795    | DIHED =     | 6405.0534 |
| VDWAALS = | 76933.9375  | EEL =      | -566512.3338 | HBOND =     | 0.0000    |
| 1-4 VDW = | 1796.2227   | 1-4 EEL =  | 23321.8231   | RESTRAINT = | 0.0000    |



Supplementary Text 3

| NSTEP     | ENERGY      | RMS        | GMAX         | NAME        | NUMBER    |
|-----------|-------------|------------|--------------|-------------|-----------|
| 1400      | -4.2518E+05 | 1.5912E-01 | 2.3584E+01   | CZ          | 3806      |
| BOND =    | 31984.2500  | ANGLE =    | 1198.7269    | DIHED =     | 6391.9452 |
| VDWAALS = | 77164.6413  | EEL =      | -567033.0362 | HBOND =     | 0.0000    |
| 1-4 VDW = | 1793.8397   | 1-4 EEL =  | 23322.0726   | RESTRAINT = | 0.0000    |

| NSTEP     | ENERGY      | RMS        | GMAX         | NAME        | NUMBER    |
|-----------|-------------|------------|--------------|-------------|-----------|
| 1500      | -4.2542E+05 | 1.0919E-01 | 1.1430E+01   | CE2         | 3808      |
| BOND =    | 32029.0480  | ANGLE =    | 1195.3299    | DIHED =     | 6386.8404 |
| VDWAALS = | 77380.7945  | EEL =      | -567529.3288 | HBOND =     | 0.0000    |
| 1-4 VDW = | 1791.7565   | 1-4 EEL =  | 23323.5169   | RESTRAINT = | 0.0000    |

| NSTEP     | ENERGY      | RMS        | GMAX         | NAME        | NUMBER    |
|-----------|-------------|------------|--------------|-------------|-----------|
| 1600      | -4.2565E+05 | 4.2111E-01 | 7.8000E+01   | CD          | 3230      |
| BOND =    | 32081.0993  | ANGLE =    | 1193.8988    | DIHED =     | 6381.9940 |
| VDWAALS = | 77586.3012  | EEL =      | -568011.7539 | HBOND =     | 0.0000    |
| 1-4 VDW = | 1789.5505   | 1-4 EEL =  | 23326.0576   | RESTRAINT = | 0.0000    |

| NSTEP     | ENERGY      | RMS        | GMAX         | NAME        | NUMBER    |
|-----------|-------------|------------|--------------|-------------|-----------|
| 1700      | -4.2588E+05 | 3.4467E-01 | 6.7153E+01   | CZ          | 3806      |
| BOND =    | 32121.3542  | ANGLE =    | 1191.5326    | DIHED =     | 6377.1254 |
| VDWAALS = | 77779.5714  | EEL =      | -568467.5694 | HBOND =     | 0.0000    |
| 1-4 VDW = | 1787.7827   | 1-4 EEL =  | 23328.0820   | RESTRAINT = | 0.0000    |

| NSTEP     | ENERGY      | RMS        | GMAX         | NAME        | NUMBER    |
|-----------|-------------|------------|--------------|-------------|-----------|
| 1800      | -4.2610E+05 | 3.1399E-01 | 7.2533E+01   | CD          | 3230      |
| BOND =    | 32160.9932  | ANGLE =    | 1189.7351    | DIHED =     | 6372.6317 |
| VDWAALS = | 77964.8542  | EEL =      | -568905.3069 | HBOND =     | 0.0000    |
| 1-4 VDW = | 1786.1920   | 1-4 EEL =  | 23329.3929   | RESTRAINT = | 0.0000    |

| NSTEP     | ENERGY      | RMS        | GMAX         | NAME        | NUMBER    |
|-----------|-------------|------------|--------------|-------------|-----------|
| 1900      | -4.2631E+05 | 2.7061E-01 | 4.9665E+01   | CE2         | 3808      |
| BOND =    | 32200.7163  | ANGLE =    | 1188.0689    | DIHED =     | 6368.8913 |
| VDWAALS = | 78140.7665  | EEL =      | -569325.1557 | HBOND =     | 0.0000    |
| 1-4 VDW = | 1784.5532   | 1-4 EEL =  | 23330.1925   | RESTRAINT = | 0.0000    |

| NSTEP  | ENERGY      | RMS        | GMAX       | NAME    | NUMBER    |
|--------|-------------|------------|------------|---------|-----------|
| 2000   | -4.2652E+05 | 1.5137E-01 | 2.5248E+01 | CE2     | 3808      |
| BOND = | 32237.8330  | ANGLE =    | 1186.8015  | DIHED = | 6366.0304 |

Supplementary Text 3

VDWAALS = 78312.2094 EEL = -569734.2486 HBOND = 0.0000  
 1-4 VDW = 1783.1387 1-4 EEL = 23330.6318 RESTRAINT = 0.0000

NSTEP ENERGY RMS GMAX NAME NUMBER  
 2100 -4.2672E+05 9.5443E-02 7.1025E+00 CZ 3806

BOND = 32277.0022 ANGLE = 1185.7779 DIHED = 6363.7445  
 VDWAALS = 78483.7133 EEL = -570139.4495 HBOND = 0.0000  
 1-4 VDW = 1781.8925 1-4 EEL = 23330.9989 RESTRAINT = 0.0000

NSTEP ENERGY RMS GMAX NAME NUMBER  
 2200 -4.2691E+05 9.6173E-02 9.0962E+00 CE2 3808

BOND = 32317.5350 ANGLE = 1184.9615 DIHED = 6361.7807  
 VDWAALS = 78658.5543 EEL = -570548.0313 HBOND = 0.0000  
 1-4 VDW = 1780.7519 1-4 EEL = 23331.4051 RESTRAINT = 0.0000

NSTEP ENERGY RMS GMAX NAME NUMBER  
 2300 -4.2710E+05 3.5344E-01 7.2085E+01 CD 3230

BOND = 32363.4110 ANGLE = 1184.7582 DIHED = 6360.2636  
 VDWAALS = 78833.4293 EEL = -570955.2340 HBOND = 0.0000  
 1-4 VDW = 1779.7350 1-4 EEL = 23331.8598 RESTRAINT = 0.0000

NSTEP ENERGY RMS GMAX NAME NUMBER  
 2400 -4.2729E+05 2.8641E-01 5.3787E+01 CD 3230

BOND = 32400.7073 ANGLE = 1183.6718 DIHED = 6359.3655  
 VDWAALS = 79001.4905 EEL = -571348.3138 HBOND = 0.0000  
 1-4 VDW = 1778.6566 1-4 EEL = 23332.4375 RESTRAINT = 0.0000

NSTEP ENERGY RMS GMAX NAME NUMBER  
 2500 -4.2748E+05 2.5626E-01 5.1406E+01 CE2 3808

BOND = 32439.3989 ANGLE = 1183.2020 DIHED = 6355.1172  
 VDWAALS = 79169.7727 EEL = -571742.3009 HBOND = 0.0000  
 1-4 VDW = 1777.4784 1-4 EEL = 23332.9304 RESTRAINT = 0.0000

NSTEP ENERGY RMS GMAX NAME NUMBER  
 2600 -4.2767E+05 1.5318E-01 2.3446E+01 CE2 3808

BOND = 32476.5295 ANGLE = 1182.5608 DIHED = 6352.6728  
 VDWAALS = 79338.0036 EEL = -572127.9059 HBOND = 0.0000  
 1-4 VDW = 1776.5026 1-4 EEL = 23333.2685 RESTRAINT = 0.0000

NSTEP ENERGY RMS GMAX NAME NUMBER  
 2700 -4.2784E+05 1.1493E-01 1.5842E+01 CE2 3808

Supplementary Text 3

|         |   |            |         |   |              |           |   |           |
|---------|---|------------|---------|---|--------------|-----------|---|-----------|
| BOND    | = | 32512.6890 | ANGLE   | = | 1181.8367    | DIHED     | = | 6350.0138 |
| VDWAALS | = | 79495.5559 | EEL     | = | -572488.5002 | HBOND     | = | 0.0000    |
| 1-4 VDW | = | 1775.7392  | 1-4 EEL | = | 23333.5700   | RESTRAINT | = | 0.0000    |

|       |             |            |            |      |        |
|-------|-------------|------------|------------|------|--------|
| NSTEP | ENERGY      | RMS        | GMAX       | NAME | NUMBER |
| 2800  | -4.2800E+05 | 8.7812E-02 | 7.1043E+00 | CD1  | 3802   |

|         |   |            |         |   |              |           |   |           |
|---------|---|------------|---------|---|--------------|-----------|---|-----------|
| BOND    | = | 32548.0015 | ANGLE   | = | 1180.9310    | DIHED     | = | 6347.5716 |
| VDWAALS | = | 79647.3427 | EEL     | = | -572835.4372 | HBOND     | = | 0.0000    |
| 1-4 VDW | = | 1775.2324  | 1-4 EEL | = | 23333.6533   | RESTRAINT | = | 0.0000    |

|       |             |            |            |      |        |
|-------|-------------|------------|------------|------|--------|
| NSTEP | ENERGY      | RMS        | GMAX       | NAME | NUMBER |
| 2900  | -4.2816E+05 | 1.0100E-01 | 1.3537E+01 | CE2  | 3808   |

|         |   |            |         |   |              |           |   |           |
|---------|---|------------|---------|---|--------------|-----------|---|-----------|
| BOND    | = | 32583.2789 | ANGLE   | = | 1180.1377    | DIHED     | = | 6345.4171 |
| VDWAALS | = | 79796.9423 | EEL     | = | -573176.8380 | HBOND     | = | 0.0000    |
| 1-4 VDW | = | 1774.7179  | 1-4 EEL | = | 23333.2584   | RESTRAINT | = | 0.0000    |

|       |             |            |            |      |        |
|-------|-------------|------------|------------|------|--------|
| NSTEP | ENERGY      | RMS        | GMAX       | NAME | NUMBER |
| 3000  | -4.2832E+05 | 2.8262E-01 | 5.0628E+01 | CE2  | 3808   |

|         |   |            |         |   |              |           |   |           |
|---------|---|------------|---------|---|--------------|-----------|---|-----------|
| BOND    | = | 32621.9654 | ANGLE   | = | 1179.5955    | DIHED     | = | 6343.3918 |
| VDWAALS | = | 79948.1785 | EEL     | = | -573520.3245 | HBOND     | = | 0.0000    |
| 1-4 VDW | = | 1774.0978  | 1-4 EEL | = | 23332.5471   | RESTRAINT | = | 0.0000    |

|       |             |            |            |      |        |
|-------|-------------|------------|------------|------|--------|
| NSTEP | ENERGY      | RMS        | GMAX       | NAME | NUMBER |
| 3100  | -4.2848E+05 | 2.3012E-01 | 4.4178E+01 | CE2  | 3808   |

|         |   |            |         |   |              |           |   |           |
|---------|---|------------|---------|---|--------------|-----------|---|-----------|
| BOND    | = | 32655.6422 | ANGLE   | = | 1178.6979    | DIHED     | = | 6341.3892 |
| VDWAALS | = | 80097.8365 | EEL     | = | -573857.3012 | HBOND     | = | 0.0000    |
| 1-4 VDW | = | 1773.4839  | 1-4 EEL | = | 23331.6245   | RESTRAINT | = | 0.0000    |

|       |             |            |            |      |        |
|-------|-------------|------------|------------|------|--------|
| NSTEP | ENERGY      | RMS        | GMAX       | NAME | NUMBER |
| 3200  | -4.2863E+05 | 2.1479E-01 | 3.6635E+01 | CD   | 3230   |

|         |   |            |         |   |              |           |   |           |
|---------|---|------------|---------|---|--------------|-----------|---|-----------|
| BOND    | = | 32689.5754 | ANGLE   | = | 1178.1486    | DIHED     | = | 6338.9210 |
| VDWAALS | = | 80246.8669 | EEL     | = | -574190.0170 | HBOND     | = | 0.0000    |
| 1-4 VDW | = | 1772.8807  | 1-4 EEL | = | 23330.6770   | RESTRAINT | = | 0.0000    |

|       |             |            |            |      |        |
|-------|-------------|------------|------------|------|--------|
| NSTEP | ENERGY      | RMS        | GMAX       | NAME | NUMBER |
| 3300  | -4.2878E+05 | 1.7219E-01 | 3.1147E+01 | CE2  | 3808   |

|         |   |            |         |   |              |           |   |           |
|---------|---|------------|---------|---|--------------|-----------|---|-----------|
| BOND    | = | 32721.9198 | ANGLE   | = | 1177.3450    | DIHED     | = | 6336.8914 |
| VDWAALS | = | 80391.8714 | EEL     | = | -574510.0997 | HBOND     | = | 0.0000    |
| 1-4 VDW | = | 1772.3983  | 1-4 EEL | = | 23329.9326   | RESTRAINT | = | 0.0000    |

## Supplementary Text 3

| NSTEP     | ENERGY      | RMS        | GMAX         | NAME        | NUMBER    |
|-----------|-------------|------------|--------------|-------------|-----------|
| 3400      | -4.2893E+05 | 8.1284E-02 | 6.7763E+00   | CE2         | 3808      |
| BOND =    | 32753.9897  | ANGLE =    | 1176.7510    | DIHED =     | 6335.5354 |
| VDWAALS = | 80538.5270  | EEL =      | -574831.7005 | HBOND =     | 0.0000    |
| 1-4 VDW = | 1771.9497   | 1-4 EEL =  | 23329.1356   | RESTRAINT = | 0.0000    |

| NSTEP     | ENERGY      | RMS        | GMAX         | NAME        | NUMBER    |
|-----------|-------------|------------|--------------|-------------|-----------|
| 3500      | -4.2907E+05 | 9.4228E-02 | 1.2073E+01   | CE2         | 3808      |
| BOND =    | 32787.0335  | ANGLE =    | 1176.3653    | DIHED =     | 6334.4890 |
| VDWAALS = | 80683.7861  | EEL =      | -575150.4336 | HBOND =     | 0.0000    |
| 1-4 VDW = | 1771.5115   | 1-4 EEL =  | 23328.3161   | RESTRAINT = | 0.0000    |

| NSTEP     | ENERGY      | RMS        | GMAX         | NAME        | NUMBER    |
|-----------|-------------|------------|--------------|-------------|-----------|
| 3600      | -4.2921E+05 | 2.7081E-01 | 4.8061E+01   | CE2         | 3808      |
| BOND =    | 32822.8357  | ANGLE =    | 1176.3322    | DIHED =     | 6333.6054 |
| VDWAALS = | 80827.5624  | EEL =      | -575466.9056 | HBOND =     | 0.0000    |
| 1-4 VDW = | 1771.0916   | 1-4 EEL =  | 23327.4922   | RESTRAINT = | 0.0000    |

| NSTEP     | ENERGY      | RMS        | GMAX         | NAME        | NUMBER    |
|-----------|-------------|------------|--------------|-------------|-----------|
| 3700      | -4.2935E+05 | 2.2450E-01 | 4.2361E+01   | CE2         | 3808      |
| BOND =    | 32853.8954  | ANGLE =    | 1176.0403    | DIHED =     | 6332.8344 |
| VDWAALS = | 80967.9834  | EEL =      | -575777.9413 | HBOND =     | 0.0000    |
| 1-4 VDW = | 1770.6226   | 1-4 EEL =  | 23326.6463   | RESTRAINT = | 0.0000    |

| NSTEP     | ENERGY      | RMS        | GMAX         | NAME        | NUMBER    |
|-----------|-------------|------------|--------------|-------------|-----------|
| 3800      | -4.2949E+05 | 1.9314E-01 | 3.4823E+01   | CE2         | 3808      |
| BOND =    | 32884.3866  | ANGLE =    | 1175.5451    | DIHED =     | 6332.2109 |
| VDWAALS = | 81103.3377  | EEL =      | -576078.2902 | HBOND =     | 0.0000    |
| 1-4 VDW = | 1770.1893   | 1-4 EEL =  | 23325.7696   | RESTRAINT = | 0.0000    |

| NSTEP     | ENERGY      | RMS        | GMAX         | NAME        | NUMBER    |
|-----------|-------------|------------|--------------|-------------|-----------|
| 3900      | -4.2963E+05 | 1.2553E-01 | 2.1301E+01   | CE2         | 3808      |
| BOND =    | 32915.3777  | ANGLE =    | 1175.1394    | DIHED =     | 6331.6896 |
| VDWAALS = | 81242.9836  | EEL =      | -576386.0594 | HBOND =     | 0.0000    |
| 1-4 VDW = | 1769.7879   | 1-4 EEL =  | 23324.7174   | RESTRAINT = | 0.0000    |

| NSTEP     | ENERGY      | RMS        | GMAX         | NAME        | NUMBER    |
|-----------|-------------|------------|--------------|-------------|-----------|
| 4000      | -4.2976E+05 | 7.7552E-02 | 6.0963E+00   | CE2         | 3808      |
| BOND =    | 32945.4667  | ANGLE =    | 1174.7274    | DIHED =     | 6331.2640 |
| VDWAALS = | 81376.7889  | EEL =      | -576679.1745 | HBOND =     | 0.0000    |
| 1-4 VDW = | 1769.3567   | 1-4 EEL =  | 23323.6069   | RESTRAINT = | 0.0000    |

Supplementary Text 3

| NSTEP     | ENERGY      | RMS        | GMAX         | NAME        | NUMBER    |
|-----------|-------------|------------|--------------|-------------|-----------|
| 4100      | -4.2989E+05 | 3.0480E-01 | 5.8444E+01   | CE2         | 3808      |
| BOND =    | 32980.3989  | ANGLE =    | 1174.7729    | DIHED =     | 6330.2750 |
| VDWAALS = | 81511.4227  | EEL =      | -576974.6184 | HBOND =     | 0.0000    |
| 1-4 VDW = | 1768.8466   | 1-4 EEL =  | 23322.2750   | RESTRAINT = | 0.0000    |

| NSTEP     | ENERGY      | RMS        | GMAX         | NAME        | NUMBER    |
|-----------|-------------|------------|--------------|-------------|-----------|
| 4200      | -4.3002E+05 | 7.6980E-02 | 6.2645E+00   | CE2         | 3808      |
| BOND =    | 33005.3701  | ANGLE =    | 1174.3094    | DIHED =     | 6327.9855 |
| VDWAALS = | 81638.7793  | EEL =      | -577254.6966 | HBOND =     | 0.0000    |
| 1-4 VDW = | 1768.2723   | 1-4 EEL =  | 23320.6105   | RESTRAINT = | 0.0000    |

| NSTEP     | ENERGY      | RMS        | GMAX         | NAME        | NUMBER    |
|-----------|-------------|------------|--------------|-------------|-----------|
| 4300      | -4.3014E+05 | 2.1207E-01 | 4.1527E+01   | CE2         | 3808      |
| BOND =    | 33036.4328  | ANGLE =    | 1174.3391    | DIHED =     | 6326.5923 |
| VDWAALS = | 81766.4419  | EEL =      | -577534.9707 | HBOND =     | 0.0000    |
| 1-4 VDW = | 1767.6381   | 1-4 EEL =  | 23318.8112   | RESTRAINT = | 0.0000    |

| NSTEP     | ENERGY      | RMS        | GMAX         | NAME        | NUMBER    |
|-----------|-------------|------------|--------------|-------------|-----------|
| 4400      | -4.3027E+05 | 1.9147E-01 | 3.6979E+01   | CE2         | 3808      |
| BOND =    | 33064.7771  | ANGLE =    | 1174.3908    | DIHED =     | 6325.7401 |
| VDWAALS = | 81892.4315  | EEL =      | -577811.7660 | HBOND =     | 0.0000    |
| 1-4 VDW = | 1766.9091   | 1-4 EEL =  | 23317.1267   | RESTRAINT = | 0.0000    |

| NSTEP     | ENERGY      | RMS        | GMAX         | NAME        | NUMBER    |
|-----------|-------------|------------|--------------|-------------|-----------|
| 4500      | -4.3040E+05 | 1.1142E-01 | 1.6974E+01   | CE2         | 3808      |
| BOND =    | 33091.7530  | ANGLE =    | 1174.4080    | DIHED =     | 6324.6254 |
| VDWAALS = | 82016.1806  | EEL =      | -578084.0010 | HBOND =     | 0.0000    |
| 1-4 VDW = | 1766.1100   | 1-4 EEL =  | 23315.3999   | RESTRAINT = | 0.0000    |

| NSTEP     | ENERGY      | RMS        | GMAX         | NAME        | NUMBER    |
|-----------|-------------|------------|--------------|-------------|-----------|
| 4600      | -4.3052E+05 | 7.8601E-02 | 8.2571E+00   | CE2         | 3808      |
| BOND =    | 33119.5318  | ANGLE =    | 1174.4184    | DIHED =     | 6323.6888 |
| VDWAALS = | 82138.9335  | EEL =      | -578354.1368 | HBOND =     | 0.0000    |
| 1-4 VDW = | 1765.4470   | 1-4 EEL =  | 23313.3861   | RESTRAINT = | 0.0000    |

| NSTEP  | ENERGY      | RMS        | GMAX       | NAME    | NUMBER    |
|--------|-------------|------------|------------|---------|-----------|
| 4700   | -4.3064E+05 | 8.7948E-02 | 1.1624E+01 | CE2     | 3808      |
| BOND = | 33147.5502  | ANGLE =    | 1174.3965  | DIHED = | 6323.4818 |

Supplementary Text 3

VDWAALS = 82261.6476 EEL = -578623.5613 HBOND = 0.0000  
 1-4 VDW = 1764.9577 1-4 EEL = 23311.5059 RESTRAINT = 0.0000

| NSTEP | ENERGY      | RMS        | GMAX       | NAME | NUMBER |
|-------|-------------|------------|------------|------|--------|
| 4800  | -4.3075E+05 | 7.6503E-02 | 7.9890E+00 | CE2  | 3808   |

BOND = 33173.5461 ANGLE = 1174.4503 DIHED = 6323.5292  
 VDWAALS = 82376.7281 EEL = -578874.9382 HBOND = 0.0000  
 1-4 VDW = 1764.4728 1-4 EEL = 23309.8243 RESTRAINT = 0.0000

| NSTEP | ENERGY      | RMS        | GMAX       | NAME | NUMBER |
|-------|-------------|------------|------------|------|--------|
| 4900  | -4.3086E+05 | 2.0427E-01 | 4.0076E+01 | CE2  | 3808   |

BOND = 33200.9619 ANGLE = 1174.7099 DIHED = 6323.6537  
 VDWAALS = 82490.0201 EEL = -579123.0490 HBOND = 0.0000  
 1-4 VDW = 1763.9750 1-4 EEL = 23308.1793 RESTRAINT = 0.0000

| NSTEP | ENERGY      | RMS        | GMAX       | NAME | NUMBER |
|-------|-------------|------------|------------|------|--------|
| 5000  | -4.3097E+05 | 1.9520E-01 | 3.5763E+01 | CD   | 3230   |

BOND = 33225.7442 ANGLE = 1174.7834 DIHED = 6323.8304  
 VDWAALS = 82601.6250 EEL = -579367.2882 HBOND = 0.0000  
 1-4 VDW = 1763.4604 1-4 EEL = 23306.5890 RESTRAINT = 0.0000

Maximum number of minimization cycles reached.

FINAL RESULTS

| NSTEP | ENERGY      | RMS        | GMAX       | NAME | NUMBER |
|-------|-------------|------------|------------|------|--------|
| 5000  | -4.3097E+05 | 1.9520E-01 | 3.5763E+01 | CD   | 3230   |

BOND = 33225.7442 ANGLE = 1174.7834 DIHED = 6323.8304  
 VDWAALS = 82601.6250 EEL = -579367.2882 HBOND = 0.0000  
 1-4 VDW = 1763.4604 1-4 EEL = 23306.5890 RESTRAINT = 0.0000

-----  
 5. TIMINGS  
 -----

|  |                     |                           |
|--|---------------------|---------------------------|
|  | Build the list      | 28.42 (90.70% of List )   |
|  | Other               | 2.91 ( 9.30% of List )    |
|  | List time           | 31.34 ( 0.31% of Nonbo)   |
|  | Short_ene time      | 9311.51 (99.67% of Direc) |
|  | Other               | 30.61 ( 0.33% of Direc)   |
|  | Direct Ewald time   | 9342.11 (91.54% of Ewald) |
|  | Adjust Ewald time   | 34.72 ( 0.34% of Ewald)   |
|  | Fill Bspline coeffs | 27.11 ( 3.30% of Recip)   |

Supplementary Text 3

|  |            |                     |                            |
|--|------------|---------------------|----------------------------|
|  |            | Fill charge grid    | 118.67 (14.44% of Recip)   |
|  |            | Scalar sum          | 155.71 (18.95% of Recip)   |
|  |            | Grad sum            | 206.43 (25.13% of Recip)   |
|  |            | FFT time            | 313.68 (38.18% of Recip)   |
|  |            | Recip Ewald time    | 821.60 ( 8.05% of Ewald)   |
|  |            | Virial junk         | 2.36 ( 0.02% of Ewald)     |
|  |            | Other               | 4.97 ( 0.05% of Ewald)     |
|  |            | Ewald time          | 10205.78 (99.69% of Nonbo) |
|  |            | Nonbond force       | 10237.13 (99.51% of Force) |
|  |            | Bond/Angle/Dihedral | 48.98 ( 0.48% of Force)    |
|  |            | Other               | 1.34 ( 0.01% of Force)     |
|  |            | Force time          | 10287.45 (100.0% of Runmd) |
|  |            | Runmd Time          | 10287.45 (99.71% of Total) |
|  |            | Other               | 29.56 ( 0.29% of Total)    |
|  | Total time |                     | 10317.04 (100.0% of ALL )  |

| Number of list builds : 18

| Highest rstack allocated: 5732293  
 | Highest istack allocated: 107805  
 | Job began at 01:34:10.635 on 08/14/2017  
 | Setup done at 01:34:11.587 on 08/14/2017  
 | Run done at 04:26:07.673 on 08/14/2017  
 | wallclock() was called 190084 times

-----  
 Amber 16 SANDER 2016  
 -----

| Run on 08/13/2017 at 14:53:00

| Executable path: /usr/local/amber16/bin/sander  
 | Working directory: /Users/Swati  
 | Hostname: Unknown  
 | [-O]verwriting output

File Assignments:

| MDIN: minimization\_file\_2.in  
 | MDOU: NAT0\_min3\_2.out  
 | INPCRD: NAT0\_min3\_1.rst  
 | PARM: /Users/Swati/NAT0\_files/NAT0.prmtop  
 | RESTRT: NAT0\_min3\_2.rst  
 | REFC: refc  
 | MDVEL: mdvel  
 | MDFRC: mdfrc  
 | MDEN: mden  
 | MDCRD: mdcrd  
 | MDINFO: mdinfo  
 | MTMD: mtmd  
 | INPDIP: inp dip  
 | RSTDIP: rst dip  
 | INPTRAJ: inp traj

### Supplementary Text 3

Here is the input file:

```
PROT: minimization_2
&cntrl
imin = 1,
maxcyc = 5000,
ncyc = 10000,
igb = 0,
ntpr = 100,
ntp = 0
cut = 12
&end
```

---

#### 1. RESOURCE USE:

---

```
| Flags:
| getting box info from netcdf restart file
| NetCDF restart box info found
| Largest sphere to fit in unit cell has radius = 43.290
| New format PARM file being parsed.
| Version = 1.000 Date = 08/03/17 Time = 07:15:59
| NATOM = 108587 NTYPES = 17 NBNH = 104265 MBONA = 4427
| NTHETH = 9210 MTHETA = 6011 NPHIH = 19189 MPHIA = 18495
| NHPARM = 0 NPARM = 0 NNB = 179552 NRES = 33974
| NBONA = 4427 NTHETA = 6011 NPHIA = 18495 NUMBND = 67
| NUMANG = 152 NPTRA = 191 NATYP = 36 NPHB = 1
| IFBOX = 1 NMXRS = 24 IFCAP = 0 NEXTRA = 0
| NCOPY = 0
```

```
| Memory Use Allocated
| Real 8557276
| Hollerith 359737
| Integer 4292225
| Max Pairs 99320909
| nblastReal 1303044
| nblast Int 3569367
| Total 497120 kbytes
```

```
| Note: 1-4 EEL scale factors are being read from the topology file.
```

```
| Note: 1-4 VDW scale factors are being read from the topology file.
| Duplicated 0 dihedrals
| Duplicated 0 dihedrals
```

BOX TYPE: RECTILINEAR

---

#### 2. CONTROL DATA FOR THE RUN

---



### Supplementary Text 3

default\_name

General flags:

imin = 1, nmropt = 0

Nature and format of input:

ntx = 1, irest = 0, ntrx = 1

Nature and format of output:

ntxo = 2, ntpr = 100, ntrx = 1, ntwr = 1  
iwrap = 0, ntwx = 0, ntwv = 0, ntwe = 0  
ioutfm = 1, ntwprt = 0, idecomp = 0, rbornstat= 0

Potential function:

ntf = 1, ntb = 1, igb = 0, nsnb = 25  
ipol = 0, gbsa = 0, iesp = 0  
dielc = 1.00000, cut = 12.00000, intdiel = 1.00000

Frozen or restrained atoms:

ibelly = 0, ntr = 0

Energy minimization:

maxcyc = 5000, ncyc = 10000, ntmin = 1  
dx0 = 0.01000, drms = 0.00010

Ewald parameters:

verbose = 0, ew\_type = 0, nbflag = 1, use\_pme = 1  
vdwmeth = 1, eedmeth = 1, netfrnc = 0  
Box X = 122.784 Box Y = 86.581 Box Z = 120.454  
Alpha = 90.000 Beta = 90.000 Gamma = 90.000  
NFFT1 = 128 NFFT2 = 90 NFFT3 = 120  
Cutoff= 12.000 Tol =0.100E-04  
Ewald Coefficient = 0.22664  
Interpolation order = 4

| INFO: Old style inpcrd file read

---

### 3. ATOMIC COORDINATES AND VELOCITIES

---

default\_name

begin time read from input coords = 0.000 ps

Number of triangulated 3-point waters found: 33397

Sum of charges from parm topology file = -0.00000039  
Forcing neutrality...

---

### 4. RESULTS

---

Supplementary Text 3

APPROXIMATING switch and d/dx switch using CUBIC SPLINE INTERPOLATION

using 5000.0 points per unit in tabled values

TESTING RELATIVE ERROR over r ranging from 0.0 to cutoff

| CHECK switch(x): max rel err = 0.2738E-14 at 2.422500

| CHECK d/dx switch(x): max rel err = 0.7967E-11 at 2.716640

-----  
| Local SIZE OF NONBOND LIST = 53975629

| TOTAL SIZE OF NONBOND LIST = 53975629

| NSTEP     | ENERGY      | RMS        | GMAX         | NAME        | NUMBER    |
|-----------|-------------|------------|--------------|-------------|-----------|
| 1         | -4.1424E+05 | 3.4604E+00 | 3.0891E+02   | NE2         | 3896      |
| BOND =    | 32215.3288  | ANGLE =    | 2894.2659    | DIHED =     | 6372.8222 |
| VDWAALS = | 79840.8552  | EEL =      | -562877.3862 | HBOND =     | 0.0000    |
| 1-4 VDW = | 2848.5805   | 1-4 EEL =  | 24464.4772   | RESTRAINT = | 0.0000    |

| NSTEP     | ENERGY      | RMS        | GMAX         | NAME        | NUMBER    |
|-----------|-------------|------------|--------------|-------------|-----------|
| 100       | -4.2360E+05 | 4.6601E-01 | 3.8919E+01   | C           | 3051      |
| BOND =    | 31462.1947  | ANGLE =    | 1483.8942    | DIHED =     | 6296.7741 |
| VDWAALS = | 75217.6031  | EEL =      | -563905.1139 | HBOND =     | 0.0000    |
| 1-4 VDW = | 2065.4770   | 1-4 EEL =  | 23777.4973   | RESTRAINT = | 0.0000    |

| NSTEP     | ENERGY      | RMS        | GMAX         | NAME        | NUMBER    |
|-----------|-------------|------------|--------------|-------------|-----------|
| 200       | -4.2494E+05 | 6.4777E-01 | 1.0087E+02   | CG          | 3137      |
| BOND =    | 31532.3712  | ANGLE =    | 1356.7681    | DIHED =     | 6270.7246 |
| VDWAALS = | 75233.6698  | EEL =      | -564884.3727 | HBOND =     | 0.0000    |
| 1-4 VDW = | 1909.7719   | 1-4 EEL =  | 23638.7817   | RESTRAINT = | 0.0000    |

| NSTEP     | ENERGY      | RMS        | GMAX         | NAME        | NUMBER    |
|-----------|-------------|------------|--------------|-------------|-----------|
| 300       | -4.2571E+05 | 5.0321E-01 | 5.7089E+01   | CZ          | 3037      |
| BOND =    | 31595.4569  | ANGLE =    | 1317.2490    | DIHED =     | 6254.6531 |
| VDWAALS = | 75441.2149  | EEL =      | -565764.5486 | HBOND =     | 0.0000    |
| 1-4 VDW = | 1853.2864   | 1-4 EEL =  | 23590.3327   | RESTRAINT = | 0.0000    |

| NSTEP     | ENERGY      | RMS        | GMAX         | NAME        | NUMBER    |
|-----------|-------------|------------|--------------|-------------|-----------|
| 400       | -4.2629E+05 | 4.2191E-01 | 4.9299E+01   | CG          | 3032      |
| BOND =    | 31665.5164  | ANGLE =    | 1299.8061    | DIHED =     | 6239.8487 |
| VDWAALS = | 75698.1963  | EEL =      | -566585.4903 | HBOND =     | 0.0000    |
| 1-4 VDW = | 1823.0413   | 1-4 EEL =  | 23564.8713   | RESTRAINT = | 0.0000    |

| NSTEP  | ENERGY      | RMS        | GMAX       | NAME    | NUMBER    |
|--------|-------------|------------|------------|---------|-----------|
| 500    | -4.2680E+05 | 3.9923E-01 | 5.4231E+01 | CG      | 3137      |
| BOND = | 31737.6234  | ANGLE =    | 1290.4650  | DIHED = | 6228.5845 |

## Supplementary Text 3

VDWAALS = 75978.8880 EEL = -567391.7847 HBOND = 0.0000  
 1-4 VDW = 1803.2996 1-4 EEL = 23550.0282 RESTRAINT = 0.0000

NSTEP ENERGY RMS GMAX NAME NUMBER  
 600 -4.2726E+05 3.1711E-01 3.2933E+01 CZ 3037

BOND = 31807.2875 ANGLE = 1285.3807 DIHED = 6217.9236  
 VDWAALS = 76266.5985 EEL = -568165.5869 HBOND = 0.0000  
 1-4 VDW = 1789.5714 1-4 EEL = 23540.4694 RESTRAINT = 0.0000

NSTEP ENERGY RMS GMAX NAME NUMBER  
 700 -4.2766E+05 1.9674E-01 1.9753E+01 NE2 7140

BOND = 31872.9707 ANGLE = 1282.6293 DIHED = 6211.5126  
 VDWAALS = 76557.4354 EEL = -568897.6467 HBOND = 0.0000  
 1-4 VDW = 1779.8237 1-4 EEL = 23533.4694 RESTRAINT = 0.0000

NSTEP ENERGY RMS GMAX NAME NUMBER  
 800 -4.2802E+05 2.0922E-01 2.3429E+01 NE2 7140

BOND = 31938.5833 ANGLE = 1280.8466 DIHED = 6206.8355  
 VDWAALS = 76842.1489 EEL = -569589.7889 HBOND = 0.0000  
 1-4 VDW = 1772.4628 1-4 EEL = 23526.6868 RESTRAINT = 0.0000

NSTEP ENERGY RMS GMAX NAME NUMBER  
 900 -4.2835E+05 1.6197E-01 1.6809E+01 NE2 7140

BOND = 31998.7934 ANGLE = 1279.8446 DIHED = 6202.1679  
 VDWAALS = 77113.6431 EEL = -570233.6566 HBOND = 0.0000  
 1-4 VDW = 1766.4317 1-4 EEL = 23520.2712 RESTRAINT = 0.0000

NSTEP ENERGY RMS GMAX NAME NUMBER  
 1000 -4.2865E+05 4.1924E-01 5.6945E+01 NE2 7140

BOND = 32063.6454 ANGLE = 1280.3819 DIHED = 6197.2454  
 VDWAALS = 77375.5533 EEL = -570844.5022 HBOND = 0.0000  
 1-4 VDW = 1761.6476 1-4 EEL = 23514.9436 RESTRAINT = 0.0000

NSTEP ENERGY RMS GMAX NAME NUMBER  
 1100 -4.2895E+05 3.4879E-01 5.0483E+01 NE2 7140

BOND = 32119.2376 ANGLE = 1278.7164 DIHED = 6192.7311  
 VDWAALS = 77636.1601 EEL = -571448.4473 HBOND = 0.0000  
 1-4 VDW = 1757.6165 1-4 EEL = 23510.3279 RESTRAINT = 0.0000

NSTEP ENERGY RMS GMAX NAME NUMBER  
 1200 -4.2923E+05 2.9712E-01 4.7271E+01 NE2 7140

Supplementary Text 3

|         |   |            |         |   |              |           |   |           |
|---------|---|------------|---------|---|--------------|-----------|---|-----------|
| BOND    | = | 32171.5264 | ANGLE   | = | 1276.8961    | DIHED     | = | 6189.0290 |
| VDWAALS | = | 77877.6734 | EEL     | = | -572008.9744 | HBOND     | = | 0.0000    |
| 1-4 VDW | = | 1754.3479  | 1-4 EEL | = | 23506.7514   | RESTRAINT | = | 0.0000    |

|       |             |            |            |      |        |
|-------|-------------|------------|------------|------|--------|
| NSTEP | ENERGY      | RMS        | GMAX       | NAME | NUMBER |
| 1300  | -4.2951E+05 | 2.7565E-01 | 4.7598E+01 | CG   | 3137   |

|         |   |            |         |   |              |           |   |           |
|---------|---|------------|---------|---|--------------|-----------|---|-----------|
| BOND    | = | 32223.2166 | ANGLE   | = | 1274.9125    | DIHED     | = | 6185.9165 |
| VDWAALS | = | 78113.3365 | EEL     | = | -572557.1914 | HBOND     | = | 0.0000    |
| 1-4 VDW | = | 1751.4393  | 1-4 EEL | = | 23502.3356   | RESTRAINT | = | 0.0000    |

|       |             |            |            |      |        |
|-------|-------------|------------|------------|------|--------|
| NSTEP | ENERGY      | RMS        | GMAX       | NAME | NUMBER |
| 1400  | -4.2977E+05 | 1.5633E-01 | 1.8948E+01 | CG   | 3137   |

|         |   |            |         |   |              |           |   |           |
|---------|---|------------|---------|---|--------------|-----------|---|-----------|
| BOND    | = | 32272.6721 | ANGLE   | = | 1271.8728    | DIHED     | = | 6182.8827 |
| VDWAALS | = | 78344.4628 | EEL     | = | -573090.5664 | HBOND     | = | 0.0000    |
| 1-4 VDW | = | 1748.4986  | 1-4 EEL | = | 23497.5877   | RESTRAINT | = | 0.0000    |

|       |             |            |            |      |        |
|-------|-------------|------------|------------|------|--------|
| NSTEP | ENERGY      | RMS        | GMAX       | NAME | NUMBER |
| 1500  | -4.3003E+05 | 1.0600E-01 | 7.1559E+00 | NE2  | 7140   |

|         |   |            |         |   |              |           |   |           |
|---------|---|------------|---------|---|--------------|-----------|---|-----------|
| BOND    | = | 32321.8997 | ANGLE   | = | 1269.4524    | DIHED     | = | 6179.5991 |
| VDWAALS | = | 78570.4784 | EEL     | = | -573607.4335 | HBOND     | = | 0.0000    |
| 1-4 VDW | = | 1745.7704  | 1-4 EEL | = | 23491.7154   | RESTRAINT | = | 0.0000    |

|       |             |            |            |      |        |
|-------|-------------|------------|------------|------|--------|
| NSTEP | ENERGY      | RMS        | GMAX       | NAME | NUMBER |
| 1600  | -4.3026E+05 | 4.0342E-01 | 6.6590E+01 | NE2  | 7140   |

|         |   |            |         |   |              |           |   |           |
|---------|---|------------|---------|---|--------------|-----------|---|-----------|
| BOND    | = | 32377.0753 | ANGLE   | = | 1269.1114    | DIHED     | = | 6176.1376 |
| VDWAALS | = | 78786.7166 | EEL     | = | -574102.9114 | HBOND     | = | 0.0000    |
| 1-4 VDW | = | 1743.2674  | 1-4 EEL | = | 23485.6133   | RESTRAINT | = | 0.0000    |

|       |             |            |            |      |        |
|-------|-------------|------------|------------|------|--------|
| NSTEP | ENERGY      | RMS        | GMAX       | NAME | NUMBER |
| 1700  | -4.3051E+05 | 1.0492E-01 | 8.0790E+00 | NE2  | 7140   |

|         |   |            |         |   |              |           |   |           |
|---------|---|------------|---------|---|--------------|-----------|---|-----------|
| BOND    | = | 32416.4014 | ANGLE   | = | 1266.5719    | DIHED     | = | 6173.3124 |
| VDWAALS | = | 78991.4158 | EEL     | = | -574576.7080 | HBOND     | = | 0.0000    |
| 1-4 VDW | = | 1741.2259  | 1-4 EEL | = | 23480.1534   | RESTRAINT | = | 0.0000    |

|       |             |            |            |      |        |
|-------|-------------|------------|------------|------|--------|
| NSTEP | ENERGY      | RMS        | GMAX       | NAME | NUMBER |
| 1800  | -4.3074E+05 | 2.9284E-01 | 4.6794E+01 | NE2  | 7140   |

|         |   |            |         |   |              |           |   |           |
|---------|---|------------|---------|---|--------------|-----------|---|-----------|
| BOND    | = | 32465.9944 | ANGLE   | = | 1266.7569    | DIHED     | = | 6171.2672 |
| VDWAALS | = | 79194.9067 | EEL     | = | -575050.0222 | HBOND     | = | 0.0000    |
| 1-4 VDW | = | 1739.5925  | 1-4 EEL | = | 23475.5912   | RESTRAINT | = | 0.0000    |

## Supplementary Text 3

| NSTEP | ENERGY      | RMS        | GMAX       | NAME | NUMBER |
|-------|-------------|------------|------------|------|--------|
| 1900  | -4.3096E+05 | 2.6122E-01 | 4.4354E+01 | NE2  | 7140   |

|           |            |           |              |             |           |
|-----------|------------|-----------|--------------|-------------|-----------|
| BOND =    | 32510.8017 | ANGLE =   | 1266.0380    | DIHED =     | 6169.5879 |
| VDWAALS = | 79388.1708 | EEL =     | -575504.3753 | HBOND =     | 0.0000    |
| 1-4 VDW = | 1738.0779  | 1-4 EEL = | 23472.3048   | RESTRAINT = | 0.0000    |

| NSTEP | ENERGY      | RMS        | GMAX       | NAME | NUMBER |
|-------|-------------|------------|------------|------|--------|
| 2000  | -4.3118E+05 | 1.7050E-01 | 2.4660E+01 | NE2  | 7140   |

|           |            |           |              |             |           |
|-----------|------------|-----------|--------------|-------------|-----------|
| BOND =    | 32552.8917 | ANGLE =   | 1265.9018    | DIHED =     | 6168.1082 |
| VDWAALS = | 79574.3759 | EEL =     | -575945.0717 | HBOND =     | 0.0000    |
| 1-4 VDW = | 1736.6586  | 1-4 EEL = | 23468.9426   | RESTRAINT = | 0.0000    |

| NSTEP | ENERGY      | RMS        | GMAX       | NAME | NUMBER |
|-------|-------------|------------|------------|------|--------|
| 2100  | -4.3139E+05 | 9.5601E-02 | 5.4156E+00 | NE2  | 7140   |

|           |            |           |              |             |           |
|-----------|------------|-----------|--------------|-------------|-----------|
| BOND =    | 32595.7410 | ANGLE =   | 1265.7782    | DIHED =     | 6166.6003 |
| VDWAALS = | 79759.5186 | EEL =     | -576381.2745 | HBOND =     | 0.0000    |
| 1-4 VDW = | 1735.3018  | 1-4 EEL = | 23466.3394   | RESTRAINT = | 0.0000    |

| NSTEP | ENERGY      | RMS        | GMAX       | NAME | NUMBER |
|-------|-------------|------------|------------|------|--------|
| 2200  | -4.3160E+05 | 9.4262E-02 | 5.8576E+00 | NE2  | 7140   |

|           |            |           |              |             |           |
|-----------|------------|-----------|--------------|-------------|-----------|
| BOND =    | 32638.4719 | ANGLE =   | 1266.0138    | DIHED =     | 6165.1645 |
| VDWAALS = | 79940.1316 | EEL =     | -576805.2965 | HBOND =     | 0.0000    |
| 1-4 VDW = | 1734.0954  | 1-4 EEL = | 23463.7908   | RESTRAINT = | 0.0000    |

| NSTEP | ENERGY      | RMS        | GMAX       | NAME | NUMBER |
|-------|-------------|------------|------------|------|--------|
| 2300  | -4.3180E+05 | 1.0345E-01 | 1.0220E+01 | NE2  | 7140   |

|           |            |           |              |             |           |
|-----------|------------|-----------|--------------|-------------|-----------|
| BOND =    | 32681.1538 | ANGLE =   | 1266.1527    | DIHED =     | 6164.2512 |
| VDWAALS = | 80118.0348 | EEL =     | -577224.8403 | HBOND =     | 0.0000    |
| 1-4 VDW = | 1733.0109  | 1-4 EEL = | 23461.3600   | RESTRAINT = | 0.0000    |

| NSTEP | ENERGY      | RMS        | GMAX       | NAME | NUMBER |
|-------|-------------|------------|------------|------|--------|
| 2400  | -4.3199E+05 | 2.8504E-01 | 4.4932E+01 | NE2  | 7140   |

|           |            |           |              |             |           |
|-----------|------------|-----------|--------------|-------------|-----------|
| BOND =    | 32725.1000 | ANGLE =   | 1266.9005    | DIHED =     | 6163.8345 |
| VDWAALS = | 80288.1953 | EEL =     | -577628.4506 | HBOND =     | 0.0000    |
| 1-4 VDW = | 1732.0082  | 1-4 EEL = | 23459.2293   | RESTRAINT = | 0.0000    |

| NSTEP | ENERGY      | RMS        | GMAX       | NAME | NUMBER |
|-------|-------------|------------|------------|------|--------|
| 2500  | -4.3218E+05 | 2.6260E-01 | 4.3027E+01 | NE2  | 7140   |

|           |            |           |              |             |           |
|-----------|------------|-----------|--------------|-------------|-----------|
| BOND =    | 32764.2839 | ANGLE =   | 1267.7179    | DIHED =     | 6163.5901 |
| VDWAALS = | 80452.8748 | EEL =     | -578020.8732 | HBOND =     | 0.0000    |
| 1-4 VDW = | 1731.0144  | 1-4 EEL = | 23457.0857   | RESTRAINT = | 0.0000    |

Supplementary Text 3

| NSTEP     | ENERGY      | RMS        | GMAX         | NAME        | NUMBER    |
|-----------|-------------|------------|--------------|-------------|-----------|
| 2600      | -4.3237E+05 | 2.0783E-01 | 3.5330E+01   | NE2         | 7140      |
| BOND =    | 32803.2099  | ANGLE =    | 1267.5864    | DIHED =     | 6163.3478 |
| VDWAALS = | 80615.7341  | EEL =      | -578406.8008 | HBOND =     | 0.0000    |
| 1-4 VDW = | 1730.1443   | 1-4 EEL =  | 23455.5345   | RESTRAINT = | 0.0000    |

| NSTEP     | ENERGY      | RMS        | GMAX         | NAME        | NUMBER    |
|-----------|-------------|------------|--------------|-------------|-----------|
| 2700      | -4.3256E+05 | 1.6313E-01 | 2.6744E+01   | NE2         | 7140      |
| BOND =    | 32841.9413  | ANGLE =    | 1267.8450    | DIHED =     | 6163.1898 |
| VDWAALS = | 80779.3081  | EEL =      | -578790.3037 | HBOND =     | 0.0000    |
| 1-4 VDW = | 1729.4671   | 1-4 EEL =  | 23453.5036   | RESTRAINT = | 0.0000    |

| NSTEP     | ENERGY      | RMS        | GMAX         | NAME        | NUMBER    |
|-----------|-------------|------------|--------------|-------------|-----------|
| 2800      | -4.3273E+05 | 9.0926E-02 | 7.5705E+00   | NE2         | 7140      |
| BOND =    | 32879.3537  | ANGLE =    | 1267.7315    | DIHED =     | 6163.0599 |
| VDWAALS = | 80936.9516  | EEL =      | -579159.0330 | HBOND =     | 0.0000    |
| 1-4 VDW = | 1728.8327   | 1-4 EEL =  | 23451.7186   | RESTRAINT = | 0.0000    |

| NSTEP     | ENERGY      | RMS        | GMAX         | NAME        | NUMBER    |
|-----------|-------------|------------|--------------|-------------|-----------|
| 2900      | -4.3291E+05 | 9.8809E-02 | 1.0693E+01   | NE2         | 7140      |
| BOND =    | 32917.0133  | ANGLE =    | 1268.0488    | DIHED =     | 6162.9778 |
| VDWAALS = | 81090.4213  | EEL =      | -579521.7713 | HBOND =     | 0.0000    |
| 1-4 VDW = | 1728.2001   | 1-4 EEL =  | 23449.8094   | RESTRAINT = | 0.0000    |

| NSTEP     | ENERGY      | RMS        | GMAX         | NAME        | NUMBER    |
|-----------|-------------|------------|--------------|-------------|-----------|
| 3000      | -4.3307E+05 | 2.6055E-01 | 4.5377E+01   | NE2         | 7140      |
| BOND =    | 32956.3690  | ANGLE =    | 1269.0371    | DIHED =     | 6162.9778 |
| VDWAALS = | 81238.8175  | EEL =      | -579875.2491 | HBOND =     | 0.0000    |
| 1-4 VDW = | 1727.6017   | 1-4 EEL =  | 23447.9570   | RESTRAINT = | 0.0000    |

| NSTEP     | ENERGY      | RMS        | GMAX         | NAME        | NUMBER    |
|-----------|-------------|------------|--------------|-------------|-----------|
| 3100      | -4.3324E+05 | 2.5457E-01 | 4.1911E+01   | NE2         | 7140      |
| BOND =    | 32992.5337  | ANGLE =    | 1268.9003    | DIHED =     | 6163.0790 |
| VDWAALS = | 81383.2390  | EEL =      | -580220.6466 | HBOND =     | 0.0000    |
| 1-4 VDW = | 1727.0014   | 1-4 EEL =  | 23446.5979   | RESTRAINT = | 0.0000    |

| NSTEP  | ENERGY      | RMS        | GMAX       | NAME    | NUMBER    |
|--------|-------------|------------|------------|---------|-----------|
| 3200   | -4.3341E+05 | 1.9830E-01 | 3.3901E+01 | NE2     | 7140      |
| BOND = | 33027.4064  | ANGLE =    | 1269.0671  | DIHED = | 6163.3758 |

Supplementary Text 3

VDWAALS = 81528.3702 EEL = -580565.6261 HBOND = 0.0000  
 1-4 VDW = 1726.4232 1-4 EEL = 23444.9010 RESTRAINT = 0.0000

NSTEP ENERGY RMS GMAX NAME NUMBER  
 3300 -4.3357E+05 1.1338E-01 1.3958E+01 NE2 7140

BOND = 33061.6049 ANGLE = 1268.6299 DIHED = 6163.7865  
 VDWAALS = 81670.5939 EEL = -580902.2260 HBOND = 0.0000  
 1-4 VDW = 1725.9052 1-4 EEL = 23443.7261 RESTRAINT = 0.0000

NSTEP ENERGY RMS GMAX NAME NUMBER  
 3400 -4.3373E+05 8.5630E-02 5.5514E+00 NE2 7140

BOND = 33096.7097 ANGLE = 1268.5578 DIHED = 6164.3304  
 VDWAALS = 81814.6162 EEL = -581243.3917 HBOND = 0.0000  
 1-4 VDW = 1725.4052 1-4 EEL = 23442.4903 RESTRAINT = 0.0000

NSTEP ENERGY RMS GMAX NAME NUMBER  
 3500 -4.3390E+05 8.8931E-02 8.6417E+00 NE2 7140

BOND = 33132.1194 ANGLE = 1268.5123 DIHED = 6164.7963  
 VDWAALS = 81958.6953 EEL = -581586.6995 HBOND = 0.0000  
 1-4 VDW = 1724.8761 1-4 EEL = 23441.4169 RESTRAINT = 0.0000

NSTEP ENERGY RMS GMAX NAME NUMBER  
 3600 -4.3405E+05 2.4537E-01 4.8160E+01 NE2 7140

BOND = 33169.3626 ANGLE = 1268.9965 DIHED = 6165.0873  
 VDWAALS = 82099.5677 EEL = -581921.0069 HBOND = 0.0000  
 1-4 VDW = 1724.2484 1-4 EEL = 23440.4662 RESTRAINT = 0.0000

NSTEP ENERGY RMS GMAX NAME NUMBER  
 3700 -4.3421E+05 2.4109E-01 4.3220E+01 NE2 7140

BOND = 33203.3045 ANGLE = 1269.2048 DIHED = 6165.2235  
 VDWAALS = 82237.9050 EEL = -582247.7279 HBOND = 0.0000  
 1-4 VDW = 1723.6580 1-4 EEL = 23439.2129 RESTRAINT = 0.0000

NSTEP ENERGY RMS GMAX NAME NUMBER  
 3800 -4.3436E+05 1.4181E-01 2.0819E+01 NE2 7140

BOND = 33234.9833 ANGLE = 1268.4792 DIHED = 6165.2444  
 VDWAALS = 82372.7976 EEL = -582562.1995 HBOND = 0.0000  
 1-4 VDW = 1723.0838 1-4 EEL = 23438.6211 RESTRAINT = 0.0000

NSTEP ENERGY RMS GMAX NAME NUMBER  
 3900 -4.3450E+05 1.6010E-01 2.6267E+01 NE2 7140

Supplementary Text 3

|         |   |            |         |   |              |           |   |           |
|---------|---|------------|---------|---|--------------|-----------|---|-----------|
| BOND    | = | 33267.3689 | ANGLE   | = | 1268.4968    | DIHED     | = | 6165.1575 |
| VDWAALS | = | 82506.2003 | EEL     | = | -582868.6389 | HBOND     | = | 0.0000    |
| 1-4 VDW | = | 1722.5826  | 1-4 EEL | = | 23437.8981   | RESTRAINT | = | 0.0000    |

|       |             |            |            |      |        |
|-------|-------------|------------|------------|------|--------|
| NSTEP | ENERGY      | RMS        | GMAX       | NAME | NUMBER |
| 4000  | -4.3464E+05 | 8.1295E-02 | 6.7586E+00 | NE2  | 7140   |

|         |   |            |         |   |              |           |   |           |
|---------|---|------------|---------|---|--------------|-----------|---|-----------|
| BOND    | = | 33298.8828 | ANGLE   | = | 1267.8028    | DIHED     | = | 6164.9211 |
| VDWAALS | = | 82638.9229 | EEL     | = | -583173.5440 | HBOND     | = | 0.0000    |
| 1-4 VDW | = | 1722.1221  | 1-4 EEL | = | 23437.7997   | RESTRAINT | = | 0.0000    |

|       |             |            |            |      |        |
|-------|-------------|------------|------------|------|--------|
| NSTEP | ENERGY      | RMS        | GMAX       | NAME | NUMBER |
| 4100  | -4.3478E+05 | 3.0435E-01 | 5.2191E+01 | NE2  | 7140   |

|         |   |            |         |   |              |           |   |           |
|---------|---|------------|---------|---|--------------|-----------|---|-----------|
| BOND    | = | 33334.8794 | ANGLE   | = | 1268.1942    | DIHED     | = | 6164.5638 |
| VDWAALS | = | 82771.1504 | EEL     | = | -583479.4189 | HBOND     | = | 0.0000    |
| 1-4 VDW | = | 1721.7529  | 1-4 EEL | = | 23438.2165   | RESTRAINT | = | 0.0000    |

|       |             |            |            |      |        |
|-------|-------------|------------|------------|------|--------|
| NSTEP | ENERGY      | RMS        | GMAX       | NAME | NUMBER |
| 4200  | -4.3492E+05 | 7.9363E-02 | 6.4143E+00 | NE2  | 7140   |

|         |   |            |         |   |              |           |   |           |
|---------|---|------------|---------|---|--------------|-----------|---|-----------|
| BOND    | = | 33361.6533 | ANGLE   | = | 1267.6805    | DIHED     | = | 6164.1038 |
| VDWAALS | = | 82896.8825 | EEL     | = | -583771.0315 | HBOND     | = | 0.0000    |
| 1-4 VDW | = | 1721.4096  | 1-4 EEL | = | 23438.2654   | RESTRAINT | = | 0.0000    |

|       |             |            |            |      |        |
|-------|-------------|------------|------------|------|--------|
| NSTEP | ENERGY      | RMS        | GMAX       | NAME | NUMBER |
| 4300  | -4.3506E+05 | 2.0912E-01 | 3.8895E+01 | NE2  | 7140   |

|         |   |            |         |   |              |           |   |           |
|---------|---|------------|---------|---|--------------|-----------|---|-----------|
| BOND    | = | 33394.6399 | ANGLE   | = | 1268.2725    | DIHED     | = | 6163.6830 |
| VDWAALS | = | 83025.1295 | EEL     | = | -584068.4569 | HBOND     | = | 0.0000    |
| 1-4 VDW | = | 1720.9317  | 1-4 EEL | = | 23437.9518   | RESTRAINT | = | 0.0000    |

|       |             |            |            |      |        |
|-------|-------------|------------|------------|------|--------|
| NSTEP | ENERGY      | RMS        | GMAX       | NAME | NUMBER |
| 4400  | -4.3519E+05 | 1.3127E-01 | 2.0152E+01 | CG   | 6196   |

|         |   |            |         |   |              |           |   |           |
|---------|---|------------|---------|---|--------------|-----------|---|-----------|
| BOND    | = | 33422.7927 | ANGLE   | = | 1267.6905    | DIHED     | = | 6163.6447 |
| VDWAALS | = | 83145.8726 | EEL     | = | -584346.1183 | HBOND     | = | 0.0000    |
| 1-4 VDW | = | 1720.4557  | 1-4 EEL | = | 23437.0078   | RESTRAINT | = | 0.0000    |

|       |             |            |            |      |        |
|-------|-------------|------------|------------|------|--------|
| NSTEP | ENERGY      | RMS        | GMAX       | NAME | NUMBER |
| 4500  | -4.3532E+05 | 1.0463E-01 | 1.4210E+01 | NE2  | 7140   |

|         |   |            |         |   |              |           |   |           |
|---------|---|------------|---------|---|--------------|-----------|---|-----------|
| BOND    | = | 33451.5082 | ANGLE   | = | 1266.9235    | DIHED     | = | 6163.7132 |
| VDWAALS | = | 83264.6678 | EEL     | = | -584619.4069 | HBOND     | = | 0.0000    |
| 1-4 VDW | = | 1720.0763  | 1-4 EEL | = | 23436.5790   | RESTRAINT | = | 0.0000    |



Supplementary Text 3

| NSTEP | ENERGY      | RMS        | GMAX       | NAME | NUMBER |
|-------|-------------|------------|------------|------|--------|
| 4600  | -4.3544E+05 | 7.6402E-02 | 6.2995E+00 | NE2  | 7140   |

|           |            |           |              |             |           |
|-----------|------------|-----------|--------------|-------------|-----------|
| BOND =    | 33478.6505 | ANGLE =   | 1266.5204    | DIHED =     | 6163.8230 |
| VDWAALS = | 83378.4579 | EEL =     | -584882.5755 | HBOND =     | 0.0000    |
| 1-4 VDW = | 1719.7523  | 1-4 EEL = | 23436.2583   | RESTRAINT = | 0.0000    |

| NSTEP | ENERGY      | RMS        | GMAX       | NAME | NUMBER |
|-------|-------------|------------|------------|------|--------|
| 4700  | -4.3556E+05 | 2.8284E-01 | 5.4720E+01 | NE2  | 7140   |

|           |            |           |              |             |           |
|-----------|------------|-----------|--------------|-------------|-----------|
| BOND =    | 33508.5333 | ANGLE =   | 1267.1370    | DIHED =     | 6163.9533 |
| VDWAALS = | 83490.5650 | EEL =     | -585142.9004 | HBOND =     | 0.0000    |
| 1-4 VDW = | 1719.4453  | 1-4 EEL = | 23436.0074   | RESTRAINT = | 0.0000    |

| NSTEP | ENERGY      | RMS        | GMAX       | NAME | NUMBER |
|-------|-------------|------------|------------|------|--------|
| 4800  | -4.3569E+05 | 7.6255E-02 | 6.8137E+00 | NE2  | 7140   |

|           |            |           |              |             |           |
|-----------|------------|-----------|--------------|-------------|-----------|
| BOND =    | 33533.0487 | ANGLE =   | 1265.7543    | DIHED =     | 6164.0501 |
| VDWAALS = | 83606.4810 | EEL =     | -585411.3571 | HBOND =     | 0.0000    |
| 1-4 VDW = | 1719.1226  | 1-4 EEL = | 23436.1273   | RESTRAINT = | 0.0000    |

| NSTEP | ENERGY      | RMS        | GMAX       | NAME | NUMBER |
|-------|-------------|------------|------------|------|--------|
| 4900  | -4.3581E+05 | 2.4034E-01 | 5.2165E+01 | CG   | 6196   |

|           |            |           |              |             |           |
|-----------|------------|-----------|--------------|-------------|-----------|
| BOND =    | 33562.4024 | ANGLE =   | 1266.0615    | DIHED =     | 6164.1697 |
| VDWAALS = | 83723.1315 | EEL =     | -585676.5399 | HBOND =     | 0.0000    |
| 1-4 VDW = | 1718.8605  | 1-4 EEL = | 23436.1895   | RESTRAINT = | 0.0000    |

| NSTEP | ENERGY      | RMS        | GMAX       | NAME | NUMBER |
|-------|-------------|------------|------------|------|--------|
| 5000  | -4.3592E+05 | 1.6471E-01 | 3.0625E+01 | NE2  | 7140   |

|           |            |           |              |             |           |
|-----------|------------|-----------|--------------|-------------|-----------|
| BOND =    | 33588.0177 | ANGLE =   | 1265.1992    | DIHED =     | 6164.2564 |
| VDWAALS = | 83838.5396 | EEL =     | -585934.3952 | HBOND =     | 0.0000    |
| 1-4 VDW = | 1718.5470  | 1-4 EEL = | 23436.4684   | RESTRAINT = | 0.0000    |

Maximum number of minimization cycles reached.

FINAL RESULTS

| NSTEP | ENERGY      | RMS        | GMAX       | NAME | NUMBER |
|-------|-------------|------------|------------|------|--------|
| 5000  | -4.3592E+05 | 1.6471E-01 | 3.0625E+01 | NE2  | 7140   |

|           |            |           |              |             |           |
|-----------|------------|-----------|--------------|-------------|-----------|
| BOND =    | 33588.0177 | ANGLE =   | 1265.1992    | DIHED =     | 6164.2564 |
| VDWAALS = | 83838.5396 | EEL =     | -585934.3952 | HBOND =     | 0.0000    |
| 1-4 VDW = | 1718.5470  | 1-4 EEL = | 23436.4684   | RESTRAINT = | 0.0000    |

Supplementary Text 3

5. TIMINGS

```

|           Build the list           22.48 (88.60% of List )
|           Other                    2.89 (11.40% of List )
| List time                          25.37 ( 0.25% of Nonbo)
|           Short_ene time          9366.05 (99.67% of Direc)
|           Other                   30.80 ( 0.33% of Direc)
| Direct Ewald time                  9396.85 (91.67% of Ewald)
| Adjust Ewald time                 34.49 ( 0.34% of Ewald)
|           Fill Bspline coeffs     27.03 ( 3.33% of Recip)
|           Fill charge grid        118.11 (14.54% of Recip)
|           Scalar sum              155.25 (19.11% of Recip)
|           Grad sum                208.52 (25.67% of Recip)
|           FFT time                 303.53 (37.36% of Recip)
| Recip Ewald time                   812.46 ( 7.93% of Ewald)
| Virial junk                        2.26 ( 0.02% of Ewald)
| Other                              4.82 ( 0.05% of Ewald)
|           Ewald time              10250.89 (99.75% of Nonbo)
| Nonbond force                     10276.27 (99.52% of Force)
| Bond/Angle/Dihedral               47.80 ( 0.46% of Force)
| Other                              1.32 ( 0.01% of Force)
| Force time                        10325.39 (100.0% of Runmd)
| Runmd Time                        10325.39 (99.72% of Total)
| Other                              29.19 ( 0.28% of Total)
| Total time                        10354.60 (100.0% of ALL )

```

| Number of list builds : 14

```

| Highest rstack allocated: 5827323
| Highest ystack allocated: 108587
| Job began at 14:53:00.793 on 08/13/2017
| Setup done at 14:53:01.768 on 08/13/2017
| Run done at 17:45:35.434 on 08/13/2017
| wallclock() was called 190076 times

```

-----  
Amber 16 SANDER

2016  
-----

| Run on 08/13/2017 at 07:02:43

```

| Executable path: /usr/local/amber16/bin/sander
| Working directory: /Users/Swati
| Hostname: Unknown
| [-0]verwriting output

```

File Assignments:

```

| MDIN: minimization_file_2.in
| MDOUT: ZSP9_min3_2.out
| INPCRD: ZSP9_min3_1.rst
| PARM: /Users/Swati/ZSP9_files/ZSP9.prmtop
| RESTR: ZSP9_min3_2.rst

```

Supplementary Text 3

```
| REFC: refc
| MDVEL: mdvel
| MDFRC: mdfrc
| MDEN: mden
| MDCRD: mdcrd
| MDINFO: mdinfo
| MTMD: mtmd
| INPDIP: inpdip
| RSTDIP: rstdip
| INPTRA: inptraj
```

Here is the input file:

```
PROT: minimization_2
&cntrl
imin = 1,
maxcyc = 5000,
ncyc = 10000,
igb = 0,
ntpr = 100,
ntp = 0
cut = 12
&end
```

-----  
1. RESOURCE USE:  
-----

```
| Flags:
| getting box info from netcdf restart file
| NetCDF restart box info found
| Largest sphere to fit in unit cell has radius = 42.894
| New format PARM file being parsed.
| Version = 1.000 Date = 08/07/17 Time = 06:43:25
| NATOM = 107718 NTYPES = 17 NBOH = 103122 MBONA = 4716
| NTHETH = 9972 MTHETA = 6416 NPHIH = 20783 MPHIA = 19788
| NHPARM = 0 NPARM = 0 NNB = 181165 NRES = 33503
| NBOH = 4716 NTHETA = 6416 NPHIA = 19788 NUMBND = 67
| NUMANG = 152 NPTRA = 191 NATYP = 36 NPHB = 1
| IFBOX = 1 NMXRS = 24 IFCAP = 0 NEXTRA = 0
| NCOPY = 0
```

```
| Memory Use Allocated
| Real 8489530
| Hollerith 356659
| Integer 4411905
| Max Pairs 98526064
| nblastReal 1292616
| nblast Int 3561915
| Total 493831 kbytes
```

### Supplementary Text 3

| Note: 1-4 EEL scale factors are being read from the topology file.

| Note: 1-4 VDW scale factors are being read from the topology file.

| Duplicated 0 dihedrals

| Duplicated 0 dihedrals

BOX TYPE: RECTILINEAR

---

## 2. CONTROL DATA FOR THE RUN

---

default\_name

General flags:

imin = 1, nmropt = 0

Nature and format of input:

ntx = 1, irest = 0, ntrx = 1

Nature and format of output:

ntxo = 2, ntp = 100, ntrx = 1, ntwr = 1  
iwrap = 0, ntwx = 0, ntwv = 0, ntwe = 0  
ioutfm = 1, ntwprt = 0, idecomp = 0, rbornstat = 0

Potential function:

ntf = 1, ntb = 1, igb = 0, nsnb = 25  
ipol = 0, gbsa = 0, iesp = 0  
dielc = 1.00000, cut = 12.00000, intdiel = 1.00000

Frozen or restrained atoms:

ibelly = 0, ntr = 0

Energy minimization:

maxcyc = 5000, ncyc = 10000, ntmin = 1  
dx0 = 0.01000, drms = 0.00010

Ewald parameters:

verbose = 0, ew\_type = 0, nbflag = 1, use\_pme = 1  
vdwmeth = 1, eedmeth = 1, netfric = 0  
Box X = 119.635 Box Y = 85.788 Box Z = 124.094  
Alpha = 90.000 Beta = 90.000 Gamma = 90.000  
NFFT1 = 120 NFFT2 = 90 NFFT3 = 125  
Cutoff = 12.000 Tol = 0.100E-04  
Ewald Coefficient = 0.22664  
Interpolation order = 4

| INFO: Old style inpcrd file read

---

## 3. ATOMIC COORDINATES AND VELOCITIES

---

default\_name

Supplementary Text 3

begin time read from input coords = 0.000 ps

Number of triangulated 3-point waters found: 32903

Sum of charges from parm topology file = -0.00000034  
 Forcing neutrality...

-----  
 4. RESULTS  
 -----

-----  
 APPROXIMATING switch and d/dx switch using CUBIC SPLINE INTERPOLATION  
 using 5000.0 points per unit in tabled values  
 TESTING RELATIVE ERROR over r ranging from 0.0 to cutoff

| CHECK switch(x): max rel err = 0.2738E-14 at 2.422500  
 | CHECK d/dx switch(x): max rel err = 0.7967E-11 at 2.716640  
 -----

| Local SIZE OF NONBOND LIST = 53421490  
 | TOTAL SIZE OF NONBOND LIST = 53421490

| NSTEP     | ENERGY      | RMS        | GMAX         | NAME        | NUMBER    |
|-----------|-------------|------------|--------------|-------------|-----------|
| 1         | -3.9968E+05 | 4.4082E+00 | 3.2481E+02   | CE1         | 5221      |
| BOND =    | 32433.8734  | ANGLE =    | 4402.9534    | DIHED =     | 7075.4076 |
| VDWAALS = | 78355.6999  | EEL =      | -549978.1784 | HBOND =     | 0.0000    |
| 1-4 VDW = | 3444.5249   | 1-4 EEL =  | 24584.7867   | RESTRAINT = | 0.0000    |

| NSTEP     | ENERGY      | RMS        | GMAX         | NAME        | NUMBER    |
|-----------|-------------|------------|--------------|-------------|-----------|
| 100       | -4.1405E+05 | 7.2624E-01 | 5.7842E+01   | CZ          | 8770      |
| BOND =    | 30580.8131  | ANGLE =    | 1750.2106    | DIHED =     | 6867.4645 |
| VDWAALS = | 71793.1882  | EEL =      | -551249.0705 | HBOND =     | 0.0000    |
| 1-4 VDW = | 2303.2207   | 1-4 EEL =  | 23904.3005   | RESTRAINT = | 0.0000    |

| NSTEP     | ENERGY      | RMS        | GMAX         | NAME        | NUMBER    |
|-----------|-------------|------------|--------------|-------------|-----------|
| 200       | -4.1581E+05 | 5.7657E-01 | 9.8645E+01   | CZ          | 8770      |
| BOND =    | 30636.4204  | ANGLE =    | 1493.6331    | DIHED =     | 6803.0545 |
| VDWAALS = | 71887.9490  | EEL =      | -552522.0640 | HBOND =     | 0.0000    |
| 1-4 VDW = | 2118.9609   | 1-4 EEL =  | 23776.7070   | RESTRAINT = | 0.0000    |

| NSTEP     | ENERGY      | RMS        | GMAX         | NAME        | NUMBER    |
|-----------|-------------|------------|--------------|-------------|-----------|
| 300       | -4.1684E+05 | 5.5339E-01 | 9.8778E+01   | CG          | 3232      |
| BOND =    | 30734.2105  | ANGLE =    | 1392.4934    | DIHED =     | 6771.3743 |
| VDWAALS = | 72213.9485  | EEL =      | -553720.4885 | HBOND =     | 0.0000    |
| 1-4 VDW = | 2044.2571   | 1-4 EEL =  | 23719.8506   | RESTRAINT = | 0.0000    |

## Supplementary Text 3

| NSTEP | ENERGY      | RMS        | GMAX       | NAME | NUMBER |
|-------|-------------|------------|------------|------|--------|
| 400   | -4.1761E+05 | 4.6208E-01 | 9.9316E+01 | CG   | 3232   |

|         |   |            |         |   |              |           |   |           |
|---------|---|------------|---------|---|--------------|-----------|---|-----------|
| BOND    | = | 30827.3013 | ANGLE   | = | 1343.4935    | DIHED     | = | 6749.2181 |
| VDWAALS | = | 72582.4226 | EEL     | = | -554807.1539 | HBOND     | = | 0.0000    |
| 1-4 VDW | = | 2004.4568  | 1-4 EEL | = | 23685.4693   | RESTRAINT | = | 0.0000    |

| NSTEP | ENERGY      | RMS        | GMAX       | NAME | NUMBER |
|-------|-------------|------------|------------|------|--------|
| 500   | -4.1827E+05 | 3.7544E-01 | 7.0650E+01 | CZ   | 8770   |

|         |   |            |         |   |              |           |   |           |
|---------|---|------------|---------|---|--------------|-----------|---|-----------|
| BOND    | = | 30917.9788 | ANGLE   | = | 1315.6533    | DIHED     | = | 6730.8288 |
| VDWAALS | = | 72964.3157 | EEL     | = | -555835.1679 | HBOND     | = | 0.0000    |
| 1-4 VDW | = | 1979.1137  | 1-4 EEL | = | 23660.1041   | RESTRAINT | = | 0.0000    |

| NSTEP | ENERGY      | RMS        | GMAX       | NAME | NUMBER |
|-------|-------------|------------|------------|------|--------|
| 600   | -4.1884E+05 | 3.1620E-01 | 5.6210E+01 | CZ   | 8770   |

|         |   |            |         |   |              |           |   |           |
|---------|---|------------|---------|---|--------------|-----------|---|-----------|
| BOND    | = | 31006.3388 | ANGLE   | = | 1297.8864    | DIHED     | = | 6712.6602 |
| VDWAALS | = | 73336.7723 | EEL     | = | -556793.5465 | HBOND     | = | 0.0000    |
| 1-4 VDW | = | 1960.7565  | 1-4 EEL | = | 23641.8617   | RESTRAINT | = | 0.0000    |

| NSTEP | ENERGY      | RMS        | GMAX       | NAME | NUMBER |
|-------|-------------|------------|------------|------|--------|
| 700   | -4.1934E+05 | 1.5491E-01 | 1.5797E+01 | CZ   | 8770   |

|         |   |            |         |   |              |           |   |           |
|---------|---|------------|---------|---|--------------|-----------|---|-----------|
| BOND    | = | 31086.9947 | ANGLE   | = | 1285.6745    | DIHED     | = | 6698.6341 |
| VDWAALS | = | 73701.3199 | EEL     | = | -557688.8535 | HBOND     | = | 0.0000    |
| 1-4 VDW | = | 1946.6607  | 1-4 EEL | = | 23627.1187   | RESTRAINT | = | 0.0000    |

| NSTEP | ENERGY      | RMS        | GMAX       | NAME | NUMBER |
|-------|-------------|------------|------------|------|--------|
| 800   | -4.1979E+05 | 5.7790E-01 | 1.0820E+02 | CZ   | 8770   |

|         |   |            |         |   |              |           |   |           |
|---------|---|------------|---------|---|--------------|-----------|---|-----------|
| BOND    | = | 31181.7987 | ANGLE   | = | 1279.0035    | DIHED     | = | 6684.3977 |
| VDWAALS | = | 74054.8172 | EEL     | = | -558537.0950 | HBOND     | = | 0.0000    |
| 1-4 VDW | = | 1935.4130  | 1-4 EEL | = | 23613.7034   | RESTRAINT | = | 0.0000    |

| NSTEP | ENERGY      | RMS        | GMAX       | NAME | NUMBER |
|-------|-------------|------------|------------|------|--------|
| 900   | -4.2021E+05 | 5.6034E-01 | 1.5607E+02 | CG   | 3232   |

|         |   |            |         |   |              |           |   |           |
|---------|---|------------|---------|---|--------------|-----------|---|-----------|
| BOND    | = | 31255.1347 | ANGLE   | = | 1273.8222    | DIHED     | = | 6672.4587 |
| VDWAALS | = | 74387.0763 | EEL     | = | -559325.1971 | HBOND     | = | 0.0000    |
| 1-4 VDW | = | 1926.4883  | 1-4 EEL | = | 23600.8920   | RESTRAINT | = | 0.0000    |

| NSTEP | ENERGY      | RMS        | GMAX       | NAME | NUMBER |
|-------|-------------|------------|------------|------|--------|
| 1000  | -4.2060E+05 | 1.3018E-01 | 1.0063E+01 | CZ   | 8770   |

|         |   |            |         |   |              |           |   |           |
|---------|---|------------|---------|---|--------------|-----------|---|-----------|
| BOND    | = | 31315.0988 | ANGLE   | = | 1269.3347    | DIHED     | = | 6663.9999 |
| VDWAALS | = | 74702.1636 | EEL     | = | -560063.8571 | HBOND     | = | 0.0000    |
| 1-4 VDW | = | 1919.1231  | 1-4 EEL | = | 23589.5280   | RESTRAINT | = | 0.0000    |

## Supplementary Text 3

| NSTEP     | ENERGY      | RMS        | GMAX         | NAME        | NUMBER    |
|-----------|-------------|------------|--------------|-------------|-----------|
| 1100      | -4.2096E+05 | 3.4872E-01 | 6.9535E+01   | CZ          | 8770      |
| BOND =    | 31389.1657  | ANGLE =    | 1267.8813    | DIHED =     | 6657.4656 |
| VDWAALS = | 75005.5362  | EEL =      | -560769.4472 | HBOND =     | 0.0000    |
| 1-4 VDW = | 1912.8305   | 1-4 EEL =  | 23579.5959   | RESTRAINT = | 0.0000    |

| NSTEP     | ENERGY      | RMS        | GMAX         | NAME        | NUMBER    |
|-----------|-------------|------------|--------------|-------------|-----------|
| 1200      | -4.2130E+05 | 3.2014E-01 | 6.3435E+01   | CZ          | 8770      |
| BOND =    | 31454.8264  | ANGLE =    | 1266.5995    | DIHED =     | 6651.7771 |
| VDWAALS = | 75297.8929  | EEL =      | -561452.5029 | HBOND =     | 0.0000    |
| 1-4 VDW = | 1907.1498   | 1-4 EEL =  | 23571.2336   | RESTRAINT = | 0.0000    |

| NSTEP     | ENERGY      | RMS        | GMAX         | NAME        | NUMBER    |
|-----------|-------------|------------|--------------|-------------|-----------|
| 1300      | -4.2163E+05 | 2.0882E-01 | 3.5305E+01   | CZ          | 8770      |
| BOND =    | 31513.6706  | ANGLE =    | 1265.7256    | DIHED =     | 6646.9245 |
| VDWAALS = | 75565.8721  | EEL =      | -562084.2102 | HBOND =     | 0.0000    |
| 1-4 VDW = | 1902.3406   | 1-4 EEL =  | 23564.0265   | RESTRAINT = | 0.0000    |

| NSTEP     | ENERGY      | RMS        | GMAX         | NAME        | NUMBER    |
|-----------|-------------|------------|--------------|-------------|-----------|
| 1400      | -4.2194E+05 | 1.9980E-01 | 3.5723E+01   | CZ          | 8770      |
| BOND =    | 31573.0022  | ANGLE =    | 1265.5867    | DIHED =     | 6642.4846 |
| VDWAALS = | 75825.9113  | EEL =      | -562699.3791 | HBOND =     | 0.0000    |
| 1-4 VDW = | 1898.1290   | 1-4 EEL =  | 23557.2946   | RESTRAINT = | 0.0000    |

| NSTEP     | ENERGY      | RMS        | GMAX         | NAME        | NUMBER    |
|-----------|-------------|------------|--------------|-------------|-----------|
| 1500      | -4.2224E+05 | 1.1496E-01 | 7.9267E+00   | CZ          | 8770      |
| BOND =    | 31629.6175  | ANGLE =    | 1265.4450    | DIHED =     | 6638.3776 |
| VDWAALS = | 76076.3709  | EEL =      | -563294.9112 | HBOND =     | 0.0000    |
| 1-4 VDW = | 1894.3553   | 1-4 EEL =  | 23551.3741   | RESTRAINT = | 0.0000    |

| NSTEP     | ENERGY      | RMS        | GMAX         | NAME        | NUMBER    |
|-----------|-------------|------------|--------------|-------------|-----------|
| 1600      | -4.2252E+05 | 4.1203E-01 | 7.5173E+01   | CZ          | 8770      |
| BOND =    | 31693.5323  | ANGLE =    | 1266.3129    | DIHED =     | 6635.1195 |
| VDWAALS = | 76317.9240  | EEL =      | -563870.8327 | HBOND =     | 0.0000    |
| 1-4 VDW = | 1891.0067   | 1-4 EEL =  | 23546.8349   | RESTRAINT = | 0.0000    |

| NSTEP  | ENERGY      | RMS        | GMAX       | NAME    | NUMBER    |
|--------|-------------|------------|------------|---------|-----------|
| 1700   | -4.2280E+05 | 3.4146E-01 | 6.2231E+01 | CZ      | 8770      |
| BOND = | 31745.8074  | ANGLE =    | 1266.4467  | DIHED = | 6632.3513 |

Supplementary Text 3

VDWAALS = 76559.1520 EEL = -564437.7905 HBOND = 0.0000  
 1-4 VDW = 1888.1556 1-4 EEL = 23542.9638 RESTRAINT = 0.0000

NSTEP ENERGY RMS GMAX NAME NUMBER  
 1800 -4.2307E+05 2.9358E-01 5.4976E+01 CZ 8770

BOND = 31797.0727 ANGLE = 1266.3760 DIHED = 6629.6371  
 VDWAALS = 76793.5209 EEL = -564983.5788 HBOND = 0.0000  
 1-4 VDW = 1885.7719 1-4 EEL = 23539.6328 RESTRAINT = 0.0000

NSTEP ENERGY RMS GMAX NAME NUMBER  
 1900 -4.2333E+05 2.6644E-01 4.4735E+01 CZ 8770

BOND = 31847.8514 ANGLE = 1265.9773 DIHED = 6627.1711  
 VDWAALS = 77017.5452 EEL = -565508.9095 HBOND = 0.0000  
 1-4 VDW = 1883.5268 1-4 EEL = 23537.2525 RESTRAINT = 0.0000

NSTEP ENERGY RMS GMAX NAME NUMBER  
 2000 -4.2358E+05 1.5134E-01 2.2192E+01 CZ 8770

BOND = 31894.1486 ANGLE = 1265.6912 DIHED = 6625.4577  
 VDWAALS = 77230.4850 EEL = -566013.2263 HBOND = 0.0000  
 1-4 VDW = 1881.6298 1-4 EEL = 23534.8619 RESTRAINT = 0.0000

NSTEP ENERGY RMS GMAX NAME NUMBER  
 2100 -4.2382E+05 1.0003E-01 6.0654E+00 CZ 8770

BOND = 31941.1326 ANGLE = 1265.1742 DIHED = 6624.2051  
 VDWAALS = 77435.9029 EEL = -566502.6719 HBOND = 0.0000  
 1-4 VDW = 1879.9426 1-4 EEL = 23532.8216 RESTRAINT = 0.0000

NSTEP ENERGY RMS GMAX NAME NUMBER  
 2200 -4.2406E+05 1.2015E-01 1.6229E+01 CZ 8770

BOND = 31987.6150 ANGLE = 1264.6596 DIHED = 6622.8719  
 VDWAALS = 77632.6149 EEL = -566977.3769 HBOND = 0.0000  
 1-4 VDW = 1878.4129 1-4 EEL = 23530.3655 RESTRAINT = 0.0000

NSTEP ENERGY RMS GMAX NAME NUMBER  
 2300 -4.2428E+05 1.0258E-01 9.5560E+00 CZ 8770

BOND = 32030.2945 ANGLE = 1264.2582 DIHED = 6621.4300  
 VDWAALS = 77811.5446 EEL = -567416.0252 HBOND = 0.0000  
 1-4 VDW = 1876.9808 1-4 EEL = 23527.8248 RESTRAINT = 0.0000

NSTEP ENERGY RMS GMAX NAME NUMBER  
 2400 -4.2450E+05 3.0176E-01 6.5946E+01 CG 3232



Supplementary Text 3

|         |   |            |         |   |              |           |   |           |
|---------|---|------------|---------|---|--------------|-----------|---|-----------|
| BOND    | = | 32075.4729 | ANGLE   | = | 1264.2987    | DIHED     | = | 6620.0146 |
| VDWAALS | = | 77983.1149 | EEL     | = | -567843.1782 | HBOND     | = | 0.0000    |
| 1-4 VDW | = | 1875.6714  | 1-4 EEL | = | 23525.0918   | RESTRAINT | = | 0.0000    |

|       |             |            |            |      |        |
|-------|-------------|------------|------------|------|--------|
| NSTEP | ENERGY      | RMS        | GMAX       | NAME | NUMBER |
| 2500  | -4.2472E+05 | 2.4011E-01 | 4.7700E+01 | CZ   | 8770   |

|         |   |            |         |   |              |           |   |           |
|---------|---|------------|---------|---|--------------|-----------|---|-----------|
| BOND    | = | 32115.6095 | ANGLE   | = | 1263.7981    | DIHED     | = | 6618.7517 |
| VDWAALS | = | 78146.8588 | EEL     | = | -568258.1858 | HBOND     | = | 0.0000    |
| 1-4 VDW | = | 1874.2964  | 1-4 EEL | = | 23522.6782   | RESTRAINT | = | 0.0000    |

|       |             |            |            |      |        |
|-------|-------------|------------|------------|------|--------|
| NSTEP | ENERGY      | RMS        | GMAX       | NAME | NUMBER |
| 2600  | -4.2493E+05 | 1.3877E-01 | 2.1257E+01 | CZ   | 8770   |

|         |   |            |         |   |              |           |   |           |
|---------|---|------------|---------|---|--------------|-----------|---|-----------|
| BOND    | = | 32154.0198 | ANGLE   | = | 1263.3594    | DIHED     | = | 6617.6831 |
| VDWAALS | = | 78307.0140 | EEL     | = | -568666.1240 | HBOND     | = | 0.0000    |
| 1-4 VDW | = | 1873.0558  | 1-4 EEL | = | 23520.0227   | RESTRAINT | = | 0.0000    |

|       |             |            |            |      |        |
|-------|-------------|------------|------------|------|--------|
| NSTEP | ENERGY      | RMS        | GMAX       | NAME | NUMBER |
| 2700  | -4.2513E+05 | 1.6024E-01 | 2.9621E+01 | CZ   | 8770   |

|         |   |            |         |   |              |           |   |           |
|---------|---|------------|---------|---|--------------|-----------|---|-----------|
| BOND    | = | 32193.0622 | ANGLE   | = | 1263.1761    | DIHED     | = | 6616.9484 |
| VDWAALS | = | 78459.9217 | EEL     | = | -569054.4248 | HBOND     | = | 0.0000    |
| 1-4 VDW | = | 1871.9028  | 1-4 EEL | = | 23517.3045   | RESTRAINT | = | 0.0000    |

|       |             |            |            |      |        |
|-------|-------------|------------|------------|------|--------|
| NSTEP | ENERGY      | RMS        | GMAX       | NAME | NUMBER |
| 2800  | -4.2533E+05 | 1.1155E-01 | 1.5362E+01 | CZ   | 8770   |

|         |   |            |         |   |              |           |   |           |
|---------|---|------------|---------|---|--------------|-----------|---|-----------|
| BOND    | = | 32230.1978 | ANGLE   | = | 1262.9511    | DIHED     | = | 6616.4419 |
| VDWAALS | = | 78606.8973 | EEL     | = | -569428.7949 | HBOND     | = | 0.0000    |
| 1-4 VDW | = | 1870.7755  | 1-4 EEL | = | 23514.5940   | RESTRAINT | = | 0.0000    |

|       |             |            |            |      |        |
|-------|-------------|------------|------------|------|--------|
| NSTEP | ENERGY      | RMS        | GMAX       | NAME | NUMBER |
| 2900  | -4.2551E+05 | 3.1444E-01 | 6.7749E+01 | CZ   | 8770   |

|         |   |            |         |   |              |           |   |           |
|---------|---|------------|---------|---|--------------|-----------|---|-----------|
| BOND    | = | 32271.4215 | ANGLE   | = | 1263.2161    | DIHED     | = | 6616.1796 |
| VDWAALS | = | 78747.6580 | EEL     | = | -569791.9180 | HBOND     | = | 0.0000    |
| 1-4 VDW | = | 1869.6984  | 1-4 EEL | = | 23511.7658   | RESTRAINT | = | 0.0000    |

|       |             |            |            |      |        |
|-------|-------------|------------|------------|------|--------|
| NSTEP | ENERGY      | RMS        | GMAX       | NAME | NUMBER |
| 3000  | -4.2570E+05 | 2.8699E-01 | 5.7515E+01 | CG   | 3232   |

|         |   |            |         |   |              |           |   |           |
|---------|---|------------|---------|---|--------------|-----------|---|-----------|
| BOND    | = | 32307.0646 | ANGLE   | = | 1263.2544    | DIHED     | = | 6616.1606 |
| VDWAALS | = | 78885.0426 | EEL     | = | -570153.6433 | HBOND     | = | 0.0000    |
| 1-4 VDW | = | 1868.6803  | 1-4 EEL | = | 23508.7907   | RESTRAINT | = | 0.0000    |

## Supplementary Text 3

| NSTEP | ENERGY      | RMS        | GMAX       | NAME | NUMBER |
|-------|-------------|------------|------------|------|--------|
| 3100  | -4.2589E+05 | 2.4908E-01 | 4.9826E+01 | CZ   | 8770   |

|           |            |           |              |             |           |
|-----------|------------|-----------|--------------|-------------|-----------|
| BOND =    | 32341.2695 | ANGLE =   | 1263.2754    | DIHED =     | 6616.2173 |
| VDWAALS = | 79011.7911 | EEL =     | -570494.0503 | HBOND =     | 0.0000    |
| 1-4 VDW = | 1867.6754  | 1-4 EEL = | 23506.1864   | RESTRAINT = | 0.0000    |

| NSTEP | ENERGY      | RMS        | GMAX       | NAME | NUMBER |
|-------|-------------|------------|------------|------|--------|
| 3200  | -4.2607E+05 | 1.9836E-01 | 4.0496E+01 | CZ   | 8770   |

|           |            |           |              |             |           |
|-----------|------------|-----------|--------------|-------------|-----------|
| BOND =    | 32375.4351 | ANGLE =   | 1263.4432    | DIHED =     | 6616.4433 |
| VDWAALS = | 79137.6124 | EEL =     | -570837.3433 | HBOND =     | 0.0000    |
| 1-4 VDW = | 1866.7113  | 1-4 EEL = | 23503.5005   | RESTRAINT = | 0.0000    |

| NSTEP | ENERGY      | RMS        | GMAX       | NAME | NUMBER |
|-------|-------------|------------|------------|------|--------|
| 3300  | -4.2625E+05 | 1.5616E-01 | 2.9536E+01 | CZ   | 8770   |

|           |            |           |              |             |           |
|-----------|------------|-----------|--------------|-------------|-----------|
| BOND =    | 32408.5616 | ANGLE =   | 1263.6488    | DIHED =     | 6616.5889 |
| VDWAALS = | 79258.6925 | EEL =     | -571169.0227 | HBOND =     | 0.0000    |
| 1-4 VDW = | 1865.8489  | 1-4 EEL = | 23500.8772   | RESTRAINT = | 0.0000    |

| NSTEP | ENERGY      | RMS        | GMAX       | NAME | NUMBER |
|-------|-------------|------------|------------|------|--------|
| 3400  | -4.2643E+05 | 3.6594E-01 | 6.9534E+01 | CZ   | 8770   |

|           |            |           |              |             |           |
|-----------|------------|-----------|--------------|-------------|-----------|
| BOND =    | 32447.5500 | ANGLE =   | 1264.2796    | DIHED =     | 6616.5170 |
| VDWAALS = | 79378.7844 | EEL =     | -571499.0024 | HBOND =     | 0.0000    |
| 1-4 VDW = | 1865.0241  | 1-4 EEL = | 23498.4710   | RESTRAINT = | 0.0000    |

| NSTEP | ENERGY      | RMS        | GMAX       | NAME | NUMBER |
|-------|-------------|------------|------------|------|--------|
| 3500  | -4.2661E+05 | 3.0422E-01 | 6.4807E+01 | CZ   | 8770   |

|           |            |           |              |             |           |
|-----------|------------|-----------|--------------|-------------|-----------|
| BOND =    | 32478.4387 | ANGLE =   | 1264.4189    | DIHED =     | 6616.1881 |
| VDWAALS = | 79495.7339 | EEL =     | -571820.0529 | HBOND =     | 0.0000    |
| 1-4 VDW = | 1864.3610  | 1-4 EEL = | 23495.8511   | RESTRAINT = | 0.0000    |

| NSTEP | ENERGY      | RMS        | GMAX       | NAME | NUMBER |
|-------|-------------|------------|------------|------|--------|
| 3600  | -4.2678E+05 | 2.7596E-01 | 6.3445E+01 | CG   | 3232   |

|           |            |           |              |             |           |
|-----------|------------|-----------|--------------|-------------|-----------|
| BOND =    | 32510.2506 | ANGLE =   | 1264.5700    | DIHED =     | 6615.4842 |
| VDWAALS = | 79612.4280 | EEL =     | -572140.8481 | HBOND =     | 0.0000    |
| 1-4 VDW = | 1863.6485  | 1-4 EEL = | 23493.4272   | RESTRAINT = | 0.0000    |

| NSTEP | ENERGY      | RMS        | GMAX       | NAME | NUMBER |
|-------|-------------|------------|------------|------|--------|
| 3700  | -4.2695E+05 | 2.4080E-01 | 4.7797E+01 | CZ   | 8770   |

|           |            |           |              |             |           |
|-----------|------------|-----------|--------------|-------------|-----------|
| BOND =    | 32541.6134 | ANGLE =   | 1264.8384    | DIHED =     | 6614.6970 |
| VDWAALS = | 79724.4035 | EEL =     | -572450.0645 | HBOND =     | 0.0000    |
| 1-4 VDW = | 1862.8613  | 1-4 EEL = | 23491.2777   | RESTRAINT = | 0.0000    |

Supplementary Text 3

| NSTEP     | ENERGY      | RMS        | GMAX         | NAME        | NUMBER    |
|-----------|-------------|------------|--------------|-------------|-----------|
| 3800      | -4.2712E+05 | 1.5149E-01 | 2.9079E+01   | CZ          | 8770      |
| BOND =    | 32571.7818  | ANGLE =    | 1265.0748    | DIHED =     | 6613.7944 |
| VDWAALS = | 79836.4213  | EEL =      | -572757.0903 | HBOND =     | 0.0000    |
| 1-4 VDW = | 1862.0373   | 1-4 EEL =  | 23489.1915   | RESTRAINT = | 0.0000    |

| NSTEP     | ENERGY      | RMS        | GMAX         | NAME        | NUMBER    |
|-----------|-------------|------------|--------------|-------------|-----------|
| 3900      | -4.2729E+05 | 1.5089E-01 | 2.8782E+01   | CZ          | 8770      |
| BOND =    | 32603.9725  | ANGLE =    | 1265.5565    | DIHED =     | 6612.8637 |
| VDWAALS = | 79951.8510  | EEL =      | -573069.3684 | HBOND =     | 0.0000    |
| 1-4 VDW = | 1861.2330   | 1-4 EEL =  | 23487.0234   | RESTRAINT = | 0.0000    |

| NSTEP     | ENERGY      | RMS        | GMAX         | NAME        | NUMBER    |
|-----------|-------------|------------|--------------|-------------|-----------|
| 4000      | -4.2745E+05 | 8.3240E-02 | 5.8736E+00   | CZ          | 8770      |
| BOND =    | 32633.3962  | ANGLE =    | 1265.8517    | DIHED =     | 6611.8438 |
| VDWAALS = | 80062.0119  | EEL =      | -573364.3710 | HBOND =     | 0.0000    |
| 1-4 VDW = | 1860.5512   | 1-4 EEL =  | 23485.0477   | RESTRAINT = | 0.0000    |

| NSTEP     | ENERGY      | RMS        | GMAX         | NAME        | NUMBER    |
|-----------|-------------|------------|--------------|-------------|-----------|
| 4100      | -4.2760E+05 | 3.3192E-01 | 9.2775E+01   | CG          | 3232      |
| BOND =    | 32668.8279  | ANGLE =    | 1266.6559    | DIHED =     | 6610.5334 |
| VDWAALS = | 80176.2413  | EEL =      | -573664.9225 | HBOND =     | 0.0000    |
| 1-4 VDW = | 1859.8365   | 1-4 EEL =  | 23483.3216   | RESTRAINT = | 0.0000    |

| NSTEP     | ENERGY      | RMS        | GMAX         | NAME        | NUMBER    |
|-----------|-------------|------------|--------------|-------------|-----------|
| 4200      | -4.2775E+05 | 2.4405E-01 | 4.8546E+01   | CZ          | 8770      |
| BOND =    | 32696.0130  | ANGLE =    | 1267.0561    | DIHED =     | 6608.8537 |
| VDWAALS = | 80287.1886  | EEL =      | -573953.4938 | HBOND =     | 0.0000    |
| 1-4 VDW = | 1859.3439   | 1-4 EEL =  | 23481.2563   | RESTRAINT = | 0.0000    |

| NSTEP     | ENERGY      | RMS        | GMAX         | NAME        | NUMBER    |
|-----------|-------------|------------|--------------|-------------|-----------|
| 4300      | -4.2790E+05 | 2.3221E-01 | 4.5121E+01   | CZ          | 8770      |
| BOND =    | 32724.7778  | ANGLE =    | 1267.3376    | DIHED =     | 6606.5795 |
| VDWAALS = | 80395.4680  | EEL =      | -574235.9642 | HBOND =     | 0.0000    |
| 1-4 VDW = | 1858.6716   | 1-4 EEL =  | 23479.9656   | RESTRAINT = | 0.0000    |

| NSTEP  | ENERGY      | RMS        | GMAX       | NAME    | NUMBER    |
|--------|-------------|------------|------------|---------|-----------|
| 4400   | -4.2806E+05 | 1.4525E-01 | 2.7806E+01 | CZ      | 8770      |
| BOND = | 32751.9228  | ANGLE =    | 1266.7909  | DIHED = | 6604.9175 |

Supplementary Text 3

VDWAALS = 80503.7824 EEL = -574521.7083 HBOND = 0.0000  
 1-4 VDW = 1858.0279 1-4 EEL = 23479.0393 RESTRAINT = 0.0000

NSTEP ENERGY RMS GMAX NAME NUMBER  
 4500 -4.2821E+05 1.4245E-01 2.6434E+01 CZ 8770

BOND = 32780.8036 ANGLE = 1265.9738 DIHED = 6604.2400  
 VDWAALS = 80611.6085 EEL = -574809.5537 HBOND = 0.0000  
 1-4 VDW = 1857.4086 1-4 EEL = 23478.3815 RESTRAINT = 0.0000

NSTEP ENERGY RMS GMAX NAME NUMBER  
 4600 -4.2836E+05 1.0197E-01 1.5087E+01 CZ 8770

BOND = 32808.6095 ANGLE = 1265.5495 DIHED = 6603.8858  
 VDWAALS = 80717.7924 EEL = -575092.5015 HBOND = 0.0000  
 1-4 VDW = 1856.8678 1-4 EEL = 23477.6491 RESTRAINT = 0.0000

NSTEP ENERGY RMS GMAX NAME NUMBER  
 4700 -4.2851E+05 8.7249E-02 9.6396E+00 CZ 8770

BOND = 32836.9438 ANGLE = 1265.3513 DIHED = 6603.4892  
 VDWAALS = 80827.2761 EEL = -575377.9045 HBOND = 0.0000  
 1-4 VDW = 1856.3565 1-4 EEL = 23476.8394 RESTRAINT = 0.0000

NSTEP ENERGY RMS GMAX NAME NUMBER  
 4800 -4.2865E+05 2.3059E-01 4.8289E+01 CZ 8770

BOND = 32867.2165 ANGLE = 1265.4592 DIHED = 6602.9873  
 VDWAALS = 80938.2322 EEL = -575659.6539 HBOND = 0.0000  
 1-4 VDW = 1855.9070 1-4 EEL = 23475.9226 RESTRAINT = 0.0000

NSTEP ENERGY RMS GMAX NAME NUMBER  
 4900 -4.2880E+05 2.2264E-01 4.2970E+01 CZ 8770

BOND = 32894.8902 ANGLE = 1265.5494 DIHED = 6602.4111  
 VDWAALS = 81051.7878 EEL = -575943.0636 HBOND = 0.0000  
 1-4 VDW = 1855.4865 1-4 EEL = 23474.8693 RESTRAINT = 0.0000

NSTEP ENERGY RMS GMAX NAME NUMBER  
 5000 -4.2894E+05 1.7728E-01 3.5294E+01 CZ 8770

BOND = 32921.1156 ANGLE = 1265.3979 DIHED = 6601.7029  
 VDWAALS = 81161.7586 EEL = -576215.3173 HBOND = 0.0000  
 1-4 VDW = 1855.0540 1-4 EEL = 23473.9436 RESTRAINT = 0.0000

Maximum number of minimization cycles reached.

Supplementary Text 3

FINAL RESULTS

| NSTEP     | ENERGY      | RMS        | GMAX         | NAME        | NUMBER    |
|-----------|-------------|------------|--------------|-------------|-----------|
| 5000      | -4.2894E+05 | 1.7728E-01 | 3.5294E+01   | CZ          | 8770      |
| BOND =    | 32921.1156  | ANGLE =    | 1265.3979    | DIHED =     | 6601.7029 |
| VDWAALS = | 81161.7586  | EEL =      | -576215.3173 | HBOND =     | 0.0000    |
| 1-4 VDW = | 1855.0540   | 1-4 EEL =  | 23473.9436   | RESTRAINT = | 0.0000    |

-----  
 5. TIMINGS  
 -----

|  |                     |                            |
|--|---------------------|----------------------------|
|  | Build the list      | 21.09 (87.47% of List )    |
|  | Other               | 3.02 (12.53% of List )     |
|  | List time           | 24.11 ( 0.23% of Nonbo)    |
|  | Short_ene time      | 9420.14 (99.67% of Direc)  |
|  | Other               | 30.85 ( 0.33% of Direc)    |
|  | Direct Ewald time   | 9450.99 (91.62% of Ewald)  |
|  | Adjust Ewald time   | 35.53 ( 0.34% of Ewald)    |
|  | Fill Bspline coeffs | 27.13 ( 3.30% of Recip)    |
|  | Fill charge grid    | 119.99 (14.61% of Recip)   |
|  | Scalar sum          | 156.59 (19.06% of Recip)   |
|  | Grad sum            | 202.58 (24.66% of Recip)   |
|  | FFT time            | 315.14 (38.36% of Recip)   |
|  | Recip Ewald time    | 821.46 ( 7.96% of Ewald)   |
|  | Virial junk         | 2.33 ( 0.02% of Ewald)     |
|  | Other               | 5.27 ( 0.05% of Ewald)     |
|  | Ewald time          | 10315.60 (99.77% of Nonbo) |
|  | Nonbond force       | 10339.72 (99.49% of Force) |
|  | Bond/Angle/Dihedral | 51.30 ( 0.49% of Force)    |
|  | Other               | 1.36 ( 0.01% of Force)     |
|  | Force time          | 10392.37 (100.0% of Runmd) |
|  | Runmd Time          | 10392.37 (99.69% of Total) |
|  | Other               | 32.01 ( 0.31% of Total)    |
|  | Total time          | 10424.41 (100.0% of ALL )  |

| Number of list builds : 13

| Highest rstack allocated: 5729944  
 | Highest istack allocated: 107718  
 | Job began at 07:02:43.142 on 08/13/2017  
 | Setup done at 07:02:44.005 on 08/13/2017  
 | Run done at 09:56:27.585 on 08/13/2017  
 | wallclock() was called 190074 times

-----  
 Amber 16 SANDER

2016  
 -----

| Run on 02/21/2019 at 04:29:15

### Supplementary Text 3

```
| Executable path: /usr/local/amber16/bin/sander  
| Working directory: /Users/Swati  
| Hostname: Unknown  
| [-O]verwriting output
```

#### File Assignments:

```
| MDIN: /Users/Swati/minimization_file_2.in  
| MDOUT: /Users/Swati/3WY9_files_2/truncated_3WY9_min3_2.out  
| INPCRD: /Users/Swati/3WY9_files_2/truncated_3WY9_min3_1.rst  
| PARM: /Users/Swati/3WY9_files_2/3WY9.prmtop  
| RESTRT: /Users/Swati/3WY9_files_2/truncated_3WY9_min3_2.rst  
| REFC: refc  
| MDVEL: mdvel  
| MDFRC: mdfrc  
| MDEN: mden  
| MDCRD: mdcrd  
| MDINFO: mdinfo  
| MTMD: mtmd  
| INPDIP: inpdip  
| RSTDIP: rstcip  
| INPTRA: inptraj
```

Here is the input file:

```
PROT: minimization_2  
&cntrl  
imin = 1,  
maxcyc = 5000,  
ncyc = 10000,  
igb = 0,  
ntpr = 100,  
ntp = 0  
cut = 12  
&end
```

---

#### 1. RESOURCE USE:

---

```
| Flags:  
| getting box info from netcdf restart file  
| NetCDF restart box info found  
| Largest sphere to fit in unit cell has radius = 43.417  
| New format PARM file being parsed.  
| Version = 1.000 Date = 08/09/17 Time = 18:38:06  
NATOM = 89944 NTYPES = 17 NBONH = 86305 MBONA = 3731  
NTHETH = 7791 MTHETA = 5069 NPHIH = 16227 MPHIA = 15704  
NHPARM = 0 NPARM = 0 NNB = 149382 NRES = 28096  
NBONA = 3731 NTHETA = 5069 NPHIA = 15704 NUMBND = 67  
NUMANG = 152 NPTRA = 191 NATYP = 36 NPHB = 1  
IFBOX = 1 NMXRS = 24 IFCAP = 0 NEXTRA = 0
```

Supplementary Text 3

NCOPY = 0

| Memory Use | Allocated     |
|------------|---------------|
| Real       | 7102941       |
| Hollerith  | 297930        |
| Integer    | 3593065       |
| Max Pairs  | 82268778      |
| nblastReal | 1079328       |
| nblast Int | 2979057       |
| Total      | 412122 kbytes |

| Note: 1-4 EEL scale factors are being read from the topology file.

| Note: 1-4 VDW scale factors are being read from the topology file.

| Duplicated 0 dihedrals

| Duplicated 0 dihedrals

BOX TYPE: RECTILINEAR

-----  
 2. CONTROL DATA FOR THE RUN  
 -----

default\_name

General flags:

imin = 1, nmropt = 0

Nature and format of input:

ntx = 1, irest = 0, ntrx = 1

Nature and format of output:

ntxo = 2, ntrp = 100, ntrx = 1, ntwr = 1  
 iwrap = 0, ntwx = 0, ntwv = 0, ntwe = 0  
 ioutfm = 1, ntwprt = 0, idecomp = 0, rbornstat = 0

Potential function:

ntf = 1, ntb = 1, igb = 0, nsnb = 25  
 ipol = 0, gbsa = 0, iesp = 0  
 dielc = 1.00000, cut = 12.00000, intdiel = 1.00000

Frozen or restrained atoms:

ibelly = 0, ntr = 0

Energy minimization:

maxcyc = 5000, ncyc = 10000, ntmin = 1  
 dx0 = 0.01000, drms = 0.00010

Ewald parameters:

verbose = 0, ew\_type = 0, nbflag = 1, use\_pme = 1  
 vdwmeth = 1, eedmeth = 1, netfric = 0  
 Box X = 117.210 Box Y = 86.834 Box Z = 105.320  
 Alpha = 90.000 Beta = 90.000 Gamma = 90.000

Supplementary Text 3

NFFT1 = 120      NFFT2 = 90      NFFT3 = 108  
 Cutoff= 12.000   Tol = 0.100E-04  
 Ewald Coefficient = 0.22664  
 Interpolation order = 4

| INFO: Old style inpcrd file read

-----  
 3. ATOMIC COORDINATES AND VELOCITIES  
 -----

default\_name

begin time read from input coords = 0.000 ps

Number of triangulated 3-point waters found: 27622

Sum of charges from parm topology file = -0.00000030  
 Forcing neutrality...

-----  
 4. RESULTS  
 -----

-----  
 APPROXIMATING switch and d/dx switch using CUBIC SPLINE INTERPOLATION  
 using 5000.0 points per unit in tabled values

TESTING RELATIVE ERROR over r ranging from 0.0 to cutoff

| CHECK switch(x): max rel err = 0.2738E-14 at 2.422500

| CHECK d/dx switch(x): max rel err = 0.7967E-11 at 2.716640

| Local SIZE OF NONBOND LIST = 44435104

| TOTAL SIZE OF NONBOND LIST = 44435104

| NSTEP     | ENERGY      | RMS        | GMAX         | NAME        | NUMBER    |
|-----------|-------------|------------|--------------|-------------|-----------|
| 1         | -3.3570E+05 | 4.4705E+00 | 7.3544E+02   | C           | 3773      |
| BOND =    | 36377.0014  | ANGLE =    | 2650.3300    | DIHED =     | 5381.3421 |
| VDWAALS = | 65807.3845  | EEL =      | -469077.7931 | HBOND =     | 0.0000    |
| 1-4 VDW = | 2197.8628   | 1-4 EEL =  | 20962.0641   | RESTRAINT = | 0.0000    |

| NSTEP     | ENERGY      | RMS        | GMAX         | NAME        | NUMBER    |
|-----------|-------------|------------|--------------|-------------|-----------|
| 100       | -3.5025E+05 | 6.9449E-01 | 1.2712E+02   | N           | 3789      |
| BOND =    | 27031.5879  | ANGLE =    | 1516.8236    | DIHED =     | 5402.5154 |
| VDWAALS = | 63530.8221  | EEL =      | -469847.9188 | HBOND =     | 0.0000    |
| 1-4 VDW = | 1690.4601   | 1-4 EEL =  | 20426.3791   | RESTRAINT = | 0.0000    |

| NSTEP  | ENERGY      | RMS        | GMAX       | NAME    | NUMBER    |
|--------|-------------|------------|------------|---------|-----------|
| 200    | -3.5175E+05 | 6.1494E-01 | 9.4068E+01 | C       | 3787      |
| BOND = | 26640.0580  | ANGLE =    | 1283.0204  | DIHED = | 5371.9422 |



Supplementary Text 3

VDWAALS = 63592.7272 EEL = -470584.0847 HBOND = 0.0000  
 1-4 VDW = 1589.9694 1-4 EEL = 20353.6026 RESTRAINT = 0.0000

NSTEP ENERGY RMS GMAX NAME NUMBER  
 300 -3.5250E+05 5.8636E-01 1.2914E+02 CD 3234

BOND = 26552.7552 ANGLE = 1204.3470 DIHED = 5347.5305  
 VDWAALS = 63746.9670 EEL = -471238.9004 HBOND = 0.0000  
 1-4 VDW = 1555.3613 1-4 EEL = 20335.4100 RESTRAINT = 0.0000

NSTEP ENERGY RMS GMAX NAME NUMBER  
 400 -3.5302E+05 4.7726E-01 7.9582E+01 CD 3234

BOND = 26545.3261 ANGLE = 1145.6396 DIHED = 5333.5248  
 VDWAALS = 63922.7691 EEL = -471837.0130 HBOND = 0.0000  
 1-4 VDW = 1534.5648 1-4 EEL = 20333.0602 RESTRAINT = 0.0000

NSTEP ENERGY RMS GMAX NAME NUMBER  
 500 -3.5346E+05 4.2275E-01 6.4251E+01 C 3787

BOND = 26566.4500 ANGLE = 1082.2853 DIHED = 5324.1443  
 VDWAALS = 64111.0034 EEL = -472400.4148 HBOND = 0.0000  
 1-4 VDW = 1521.8673 1-4 EEL = 20338.5228 RESTRAINT = 0.0000

NSTEP ENERGY RMS GMAX NAME NUMBER  
 600 -3.5384E+05 3.5467E-01 6.1094E+01 N 3789

BOND = 26593.6258 ANGLE = 1019.4151 DIHED = 5320.7823  
 VDWAALS = 64310.9792 EEL = -472942.4822 HBOND = 0.0000  
 1-4 VDW = 1511.0032 1-4 EEL = 20342.3286 RESTRAINT = 0.0000

NSTEP ENERGY RMS GMAX NAME NUMBER  
 700 -3.5418E+05 2.8741E-01 4.7548E+01 C 3787

BOND = 26626.0208 ANGLE = 990.4963 DIHED = 5315.1192  
 VDWAALS = 64503.3558 EEL = -473465.7901 HBOND = 0.0000  
 1-4 VDW = 1502.9418 1-4 EEL = 20345.6433 RESTRAINT = 0.0000

NSTEP ENERGY RMS GMAX NAME NUMBER  
 800 -3.5447E+05 1.2379E-01 8.5597E+00 C 3787

BOND = 26657.1895 ANGLE = 977.7999 DIHED = 5310.7030  
 VDWAALS = 64694.8466 EEL = -473961.6221 HBOND = 0.0000  
 1-4 VDW = 1498.4252 1-4 EEL = 20348.4099 RESTRAINT = 0.0000

NSTEP ENERGY RMS GMAX NAME NUMBER  
 900 -3.5474E+05 1.2717E-01 1.1239E+01 N 3789

Supplementary Text 3

|         |   |            |         |   |              |           |   |           |
|---------|---|------------|---------|---|--------------|-----------|---|-----------|
| BOND    | = | 26696.4335 | ANGLE   | = | 968.5064     | DIHED     | = | 5308.0440 |
| VDWAALS | = | 64889.9751 | EEL     | = | -474452.5659 | HBOND     | = | 0.0000    |
| 1-4 VDW | = | 1494.9843  | 1-4 EEL | = | 20350.5116   | RESTRAINT | = | 0.0000    |

|       |             |            |            |      |        |
|-------|-------------|------------|------------|------|--------|
| NSTEP | ENERGY      | RMS        | GMAX       | NAME | NUMBER |
| 1000  | -3.5498E+05 | 4.5368E-01 | 6.7079E+01 | N    | 3789   |

|         |   |            |         |   |              |           |   |           |
|---------|---|------------|---------|---|--------------|-----------|---|-----------|
| BOND    | = | 26745.0513 | ANGLE   | = | 963.1718     | DIHED     | = | 5306.3550 |
| VDWAALS | = | 65082.6645 | EEL     | = | -474925.2180 | HBOND     | = | 0.0000    |
| 1-4 VDW | = | 1491.8941  | 1-4 EEL | = | 20351.5484   | RESTRAINT | = | 0.0000    |

|       |             |            |            |      |        |
|-------|-------------|------------|------------|------|--------|
| NSTEP | ENERGY      | RMS        | GMAX       | NAME | NUMBER |
| 1100  | -3.5522E+05 | 3.8712E-01 | 5.2983E+01 | C    | 3787   |

|         |   |            |         |   |              |           |   |           |
|---------|---|------------|---------|---|--------------|-----------|---|-----------|
| BOND    | = | 26780.8717 | ANGLE   | = | 961.2304     | DIHED     | = | 5305.6539 |
| VDWAALS | = | 65273.0402 | EEL     | = | -475381.6141 | HBOND     | = | 0.0000    |
| 1-4 VDW | = | 1489.3339  | 1-4 EEL | = | 20353.0157   | RESTRAINT | = | 0.0000    |

|       |             |            |            |      |        |
|-------|-------------|------------|------------|------|--------|
| NSTEP | ENERGY      | RMS        | GMAX       | NAME | NUMBER |
| 1200  | -3.5544E+05 | 4.0197E-01 | 6.6361E+01 | CD   | 3234   |

|         |   |            |         |   |              |           |   |           |
|---------|---|------------|---------|---|--------------|-----------|---|-----------|
| BOND    | = | 26824.4265 | ANGLE   | = | 955.4600     | DIHED     | = | 5306.7788 |
| VDWAALS | = | 65459.9214 | EEL     | = | -475824.7086 | HBOND     | = | 0.0000    |
| 1-4 VDW | = | 1486.8931  | 1-4 EEL | = | 20353.5044   | RESTRAINT | = | 0.0000    |

|       |             |            |            |      |        |
|-------|-------------|------------|------------|------|--------|
| NSTEP | ENERGY      | RMS        | GMAX       | NAME | NUMBER |
| 1300  | -3.5565E+05 | 3.0666E-01 | 3.8369E+01 | C    | 3787   |

|         |   |            |         |   |              |           |   |           |
|---------|---|------------|---------|---|--------------|-----------|---|-----------|
| BOND    | = | 26858.8046 | ANGLE   | = | 954.2594     | DIHED     | = | 5303.4012 |
| VDWAALS | = | 65636.7127 | EEL     | = | -476245.2930 | HBOND     | = | 0.0000    |
| 1-4 VDW | = | 1484.6364  | 1-4 EEL | = | 20355.1162   | RESTRAINT | = | 0.0000    |

|       |             |            |            |      |        |
|-------|-------------|------------|------------|------|--------|
| NSTEP | ENERGY      | RMS        | GMAX       | NAME | NUMBER |
| 1400  | -3.5585E+05 | 2.4090E-01 | 3.1480E+01 | C    | 3787   |

|         |   |            |         |   |              |           |   |           |
|---------|---|------------|---------|---|--------------|-----------|---|-----------|
| BOND    | = | 26898.5396 | ANGLE   | = | 950.7193     | DIHED     | = | 5301.7393 |
| VDWAALS | = | 65810.8529 | EEL     | = | -476650.4426 | HBOND     | = | 0.0000    |
| 1-4 VDW | = | 1482.4716  | 1-4 EEL | = | 20356.0021   | RESTRAINT | = | 0.0000    |

|       |             |            |            |      |        |
|-------|-------------|------------|------------|------|--------|
| NSTEP | ENERGY      | RMS        | GMAX       | NAME | NUMBER |
| 1500  | -3.5604E+05 | 1.2237E-01 | 1.1506E+01 | C    | 3802   |

|         |   |            |         |   |              |           |   |           |
|---------|---|------------|---------|---|--------------|-----------|---|-----------|
| BOND    | = | 26934.9643 | ANGLE   | = | 949.7724     | DIHED     | = | 5300.1586 |
| VDWAALS | = | 65979.5224 | EEL     | = | -477046.6295 | HBOND     | = | 0.0000    |
| 1-4 VDW | = | 1480.7263  | 1-4 EEL | = | 20357.7625   | RESTRAINT | = | 0.0000    |

## Supplementary Text 3

| NSTEP | ENERGY      | RMS        | GMAX       | NAME | NUMBER |
|-------|-------------|------------|------------|------|--------|
| 1600  | -3.5623E+05 | 1.0447E-01 | 6.5359E+00 | C    | 3787   |

|           |            |           |              |             |           |
|-----------|------------|-----------|--------------|-------------|-----------|
| BOND =    | 26973.5337 | ANGLE =   | 948.3894     | DIHED =     | 5298.8699 |
| VDWAALS = | 66143.2977 | EEL =     | -477433.7001 | HBOND =     | 0.0000    |
| 1-4 VDW = | 1479.1077  | 1-4 EEL = | 20359.4025   | RESTRAINT = | 0.0000    |

| NSTEP | ENERGY      | RMS        | GMAX       | NAME | NUMBER |
|-------|-------------|------------|------------|------|--------|
| 1700  | -3.5641E+05 | 3.5904E-01 | 4.9246E+01 | C    | 3787   |

|           |            |           |              |             |           |
|-----------|------------|-----------|--------------|-------------|-----------|
| BOND =    | 27016.3501 | ANGLE =   | 947.6783     | DIHED =     | 5297.6234 |
| VDWAALS = | 66304.1595 | EEL =     | -477813.7997 | HBOND =     | 0.0000    |
| 1-4 VDW = | 1477.7307  | 1-4 EEL = | 20360.9338   | RESTRAINT = | 0.0000    |

| NSTEP | ENERGY      | RMS        | GMAX       | NAME | NUMBER |
|-------|-------------|------------|------------|------|--------|
| 1800  | -3.5659E+05 | 3.0895E-01 | 4.3408E+01 | CG   | 3219   |

|           |            |           |              |             |           |
|-----------|------------|-----------|--------------|-------------|-----------|
| BOND =    | 27051.3977 | ANGLE =   | 946.7535     | DIHED =     | 5295.9649 |
| VDWAALS = | 66459.2936 | EEL =     | -478186.0448 | HBOND =     | 0.0000    |
| 1-4 VDW = | 1476.5156  | 1-4 EEL = | 20362.9189   | RESTRAINT = | 0.0000    |

| NSTEP | ENERGY      | RMS        | GMAX       | NAME | NUMBER |
|-------|-------------|------------|------------|------|--------|
| 1900  | -3.5677E+05 | 2.6565E-01 | 3.0004E+01 | C    | 3787   |

|           |            |           |              |             |           |
|-----------|------------|-----------|--------------|-------------|-----------|
| BOND =    | 27088.3226 | ANGLE =   | 943.6513     | DIHED =     | 5295.6954 |
| VDWAALS = | 66604.8802 | EEL =     | -478540.7310 | HBOND =     | 0.0000    |
| 1-4 VDW = | 1475.4424  | 1-4 EEL = | 20363.6225   | RESTRAINT = | 0.0000    |

| NSTEP | ENERGY      | RMS        | GMAX       | NAME | NUMBER |
|-------|-------------|------------|------------|------|--------|
| 2000  | -3.5695E+05 | 2.3324E-01 | 2.8154E+01 | CG   | 3219   |

|           |            |           |              |             |           |
|-----------|------------|-----------|--------------|-------------|-----------|
| BOND =    | 27123.8935 | ANGLE =   | 942.8663     | DIHED =     | 5294.8963 |
| VDWAALS = | 66750.9726 | EEL =     | -478897.0472 | HBOND =     | 0.0000    |
| 1-4 VDW = | 1474.5281  | 1-4 EEL = | 20364.7091   | RESTRAINT = | 0.0000    |

| NSTEP | ENERGY      | RMS        | GMAX       | NAME | NUMBER |
|-------|-------------|------------|------------|------|--------|
| 2100  | -3.5711E+05 | 1.2024E-01 | 1.0887E+01 | C    | 3756   |

|           |            |           |              |             |           |
|-----------|------------|-----------|--------------|-------------|-----------|
| BOND =    | 27159.1501 | ANGLE =   | 940.8324     | DIHED =     | 5294.8052 |
| VDWAALS = | 66892.3006 | EEL =     | -479240.0677 | HBOND =     | 0.0000    |
| 1-4 VDW = | 1473.5660  | 1-4 EEL = | 20365.2272   | RESTRAINT = | 0.0000    |

| NSTEP | ENERGY      | RMS        | GMAX       | NAME | NUMBER |
|-------|-------------|------------|------------|------|--------|
| 2200  | -3.5728E+05 | 1.0093E-01 | 6.8957E+00 | C    | 3756   |

|           |            |           |              |             |           |
|-----------|------------|-----------|--------------|-------------|-----------|
| BOND =    | 27194.4651 | ANGLE =   | 940.0978     | DIHED =     | 5294.2600 |
| VDWAALS = | 67031.2324 | EEL =     | -479575.1310 | HBOND =     | 0.0000    |
| 1-4 VDW = | 1472.7296  | 1-4 EEL = | 20365.8945   | RESTRAINT = | 0.0000    |

## Supplementary Text 3

| NSTEP     | ENERGY      | RMS        | GMAX         | NAME        | NUMBER    |
|-----------|-------------|------------|--------------|-------------|-----------|
| 2300      | -3.5743E+05 | 3.5229E-01 | 4.5395E+01   | C           | 3756      |
| BOND =    | 27233.9260  | ANGLE =    | 940.7672     | DIHED =     | 5293.4005 |
| VDWAALS = | 67170.3450  | EEL =      | -479910.3779 | HBOND =     | 0.0000    |
| 1-4 VDW = | 1472.1051   | 1-4 EEL =  | 20366.5537   | RESTRAINT = | 0.0000    |

| NSTEP     | ENERGY      | RMS        | GMAX         | NAME        | NUMBER    |
|-----------|-------------|------------|--------------|-------------|-----------|
| 2400      | -3.5759E+05 | 3.4363E-01 | 7.7904E+01   | CG          | 3219      |
| BOND =    | 27269.6344  | ANGLE =    | 938.4750     | DIHED =     | 5293.1087 |
| VDWAALS = | 67304.5438  | EEL =      | -480235.5482 | HBOND =     | 0.0000    |
| 1-4 VDW = | 1471.5003   | 1-4 EEL =  | 20366.9713   | RESTRAINT = | 0.0000    |

| NSTEP     | ENERGY      | RMS        | GMAX         | NAME        | NUMBER    |
|-----------|-------------|------------|--------------|-------------|-----------|
| 2500      | -3.5774E+05 | 2.4859E-01 | 3.2101E+01   | C           | 3756      |
| BOND =    | 27300.1420  | ANGLE =    | 938.0541     | DIHED =     | 5292.2229 |
| VDWAALS = | 67434.7792  | EEL =      | -480548.9865 | HBOND =     | 0.0000    |
| 1-4 VDW = | 1470.9216   | 1-4 EEL =  | 20368.1478   | RESTRAINT = | 0.0000    |

| NSTEP     | ENERGY      | RMS        | GMAX         | NAME        | NUMBER    |
|-----------|-------------|------------|--------------|-------------|-----------|
| 2600      | -3.5789E+05 | 2.4858E-01 | 4.3231E+01   | CG          | 3219      |
| BOND =    | 27333.6367  | ANGLE =    | 936.5515     | DIHED =     | 5292.0147 |
| VDWAALS = | 67561.9958  | EEL =      | -480854.3612 | HBOND =     | 0.0000    |
| 1-4 VDW = | 1470.3106   | 1-4 EEL =  | 20368.6210   | RESTRAINT = | 0.0000    |

| NSTEP     | ENERGY      | RMS        | GMAX         | NAME        | NUMBER    |
|-----------|-------------|------------|--------------|-------------|-----------|
| 2700      | -3.5804E+05 | 1.8594E-01 | 2.2011E+01   | C           | 3756      |
| BOND =    | 27363.4995  | ANGLE =    | 936.2022     | DIHED =     | 5291.3768 |
| VDWAALS = | 67685.7290  | EEL =      | -481151.1435 | HBOND =     | 0.0000    |
| 1-4 VDW = | 1469.6473   | 1-4 EEL =  | 20369.5776   | RESTRAINT = | 0.0000    |

| NSTEP     | ENERGY      | RMS        | GMAX         | NAME        | NUMBER    |
|-----------|-------------|------------|--------------|-------------|-----------|
| 2800      | -3.5817E+05 | 1.2001E-01 | 1.1859E+01   | C           | 3756      |
| BOND =    | 27393.5415  | ANGLE =    | 935.1194     | DIHED =     | 5291.2036 |
| VDWAALS = | 67803.2085  | EEL =      | -481436.7262 | HBOND =     | 0.0000    |
| 1-4 VDW = | 1468.9505   | 1-4 EEL =  | 20370.0416   | RESTRAINT = | 0.0000    |

| NSTEP  | ENERGY      | RMS        | GMAX       | NAME    | NUMBER    |
|--------|-------------|------------|------------|---------|-----------|
| 2900   | -3.5831E+05 | 1.0956E-01 | 8.9988E+00 | C       | 3745      |
| BOND = | 27422.4813  | ANGLE =    | 934.8567   | DIHED = | 5290.8932 |

Supplementary Text 3

VDWAALS = 67915.6454 EEL = -481712.6968 HBOND = 0.0000  
 1-4 VDW = 1468.3352 1-4 EEL = 20370.5190 RESTRAINT = 0.0000

NSTEP ENERGY RMS GMAX NAME NUMBER  
 3000 -3.5844E+05 3.5022E-01 9.0234E+01 CG 3219

BOND = 27453.8586 ANGLE = 934.9934 DIHED = 5290.8182  
 VDWAALS = 68023.0113 EEL = -481979.6135 HBOND = 0.0000  
 1-4 VDW = 1467.7146 1-4 EEL = 20371.2099 RESTRAINT = 0.0000

NSTEP ENERGY RMS GMAX NAME NUMBER  
 3100 -3.5857E+05 2.4742E-01 3.2119E+01 CG 3219

BOND = 27480.4746 ANGLE = 934.2605 DIHED = 5290.9548  
 VDWAALS = 68128.4966 EEL = -482245.9187 HBOND = 0.0000  
 1-4 VDW = 1467.1954 1-4 EEL = 20371.4153 RESTRAINT = 0.0000

NSTEP ENERGY RMS GMAX NAME NUMBER  
 3200 -3.5871E+05 2.2581E-01 1.9924E+01 NE2 2687

BOND = 27506.5788 ANGLE = 934.3734 DIHED = 5290.8974  
 VDWAALS = 68230.6592 EEL = -482506.2406 HBOND = 0.0000  
 1-4 VDW = 1466.8148 1-4 EEL = 20371.8743 RESTRAINT = 0.0000

NSTEP ENERGY RMS GMAX NAME NUMBER  
 3300 -3.5884E+05 1.8625E-01 1.8575E+01 NE2 2687

BOND = 27533.0392 ANGLE = 933.4891 DIHED = 5291.1381  
 VDWAALS = 68331.2722 EEL = -482763.5724 HBOND = 0.0000  
 1-4 VDW = 1466.3332 1-4 EEL = 20372.2477 RESTRAINT = 0.0000

NSTEP ENERGY RMS GMAX NAME NUMBER  
 3400 -3.5897E+05 8.5762E-02 4.4971E+00 NE2 2687

BOND = 27557.7019 ANGLE = 933.1223 DIHED = 5291.3123  
 VDWAALS = 68430.8792 EEL = -483016.7188 HBOND = 0.0000  
 1-4 VDW = 1465.9792 1-4 EEL = 20372.6957 RESTRAINT = 0.0000

NSTEP ENERGY RMS GMAX NAME NUMBER  
 3500 -3.5909E+05 8.1721E-02 3.5374E+00 NE2 2687

BOND = 27583.3052 ANGLE = 932.6942 DIHED = 5291.6138  
 VDWAALS = 68530.8927 EEL = -483270.1362 HBOND = 0.0000  
 1-4 VDW = 1465.6215 1-4 EEL = 20373.1603 RESTRAINT = 0.0000

NSTEP ENERGY RMS GMAX NAME NUMBER  
 3600 -3.5921E+05 2.9391E-01 4.1567E+01 CG 3219

Supplementary Text 3

|         |   |            |         |   |              |           |   |           |
|---------|---|------------|---------|---|--------------|-----------|---|-----------|
| BOND    | = | 27610.4751 | ANGLE   | = | 932.7623     | DIHED     | = | 5292.0204 |
| VDWAALS | = | 68626.6159 | EEL     | = | -483512.8218 | HBOND     | = | 0.0000    |
| 1-4 VDW | = | 1465.2609  | 1-4 EEL | = | 20373.7782   | RESTRAINT | = | 0.0000    |

|       |             |            |            |      |        |
|-------|-------------|------------|------------|------|--------|
| NSTEP | ENERGY      | RMS        | GMAX       | NAME | NUMBER |
| 3700  | -3.5933E+05 | 2.5350E-01 | 4.9543E+01 | CG   | 3219   |

|         |   |            |         |   |              |           |   |           |
|---------|---|------------|---------|---|--------------|-----------|---|-----------|
| BOND    | = | 27633.1467 | ANGLE   | = | 932.4384     | DIHED     | = | 5292.4257 |
| VDWAALS | = | 68720.6220 | EEL     | = | -483750.9871 | HBOND     | = | 0.0000    |
| 1-4 VDW | = | 1464.9873  | 1-4 EEL | = | 20374.3681   | RESTRAINT | = | 0.0000    |

|       |             |            |            |      |        |
|-------|-------------|------------|------------|------|--------|
| NSTEP | ENERGY      | RMS        | GMAX       | NAME | NUMBER |
| 3800  | -3.5945E+05 | 2.2008E-01 | 2.6801E+01 | NE2  | 2687   |

|         |   |            |         |   |              |           |   |           |
|---------|---|------------|---------|---|--------------|-----------|---|-----------|
| BOND    | = | 27656.5848 | ANGLE   | = | 931.8160     | DIHED     | = | 5292.8884 |
| VDWAALS | = | 68815.3417 | EEL     | = | -483986.0734 | HBOND     | = | 0.0000    |
| 1-4 VDW | = | 1464.6792  | 1-4 EEL | = | 20374.8191   | RESTRAINT | = | 0.0000    |

|       |             |            |            |      |        |
|-------|-------------|------------|------------|------|--------|
| NSTEP | ENERGY      | RMS        | GMAX       | NAME | NUMBER |
| 3900  | -3.5957E+05 | 1.0382E-01 | 9.9506E+00 | NE2  | 2687   |

|         |   |            |         |   |              |           |   |           |
|---------|---|------------|---------|---|--------------|-----------|---|-----------|
| BOND    | = | 27678.8134 | ANGLE   | = | 931.2730     | DIHED     | = | 5293.2151 |
| VDWAALS | = | 68912.7542 | EEL     | = | -484221.9820 | HBOND     | = | 0.0000    |
| 1-4 VDW | = | 1464.4012  | 1-4 EEL | = | 20375.4670   | RESTRAINT | = | 0.0000    |

|       |             |            |            |      |        |
|-------|-------------|------------|------------|------|--------|
| NSTEP | ENERGY      | RMS        | GMAX       | NAME | NUMBER |
| 4000  | -3.5967E+05 | 1.5135E-01 | 1.7563E+01 | NE2  | 2687   |

|         |   |            |         |   |              |           |   |           |
|---------|---|------------|---------|---|--------------|-----------|---|-----------|
| BOND    | = | 27701.9718 | ANGLE   | = | 930.8378     | DIHED     | = | 5293.1598 |
| VDWAALS | = | 69006.7114 | EEL     | = | -484445.1331 | HBOND     | = | 0.0000    |
| 1-4 VDW | = | 1464.0853  | 1-4 EEL | = | 20376.1478   | RESTRAINT | = | 0.0000    |

|       |             |            |            |      |        |
|-------|-------------|------------|------------|------|--------|
| NSTEP | ENERGY      | RMS        | GMAX       | NAME | NUMBER |
| 4100  | -3.5977E+05 | 7.4426E-02 | 3.5786E+00 | NE2  | 2687   |

|         |   |            |         |   |              |           |   |           |
|---------|---|------------|---------|---|--------------|-----------|---|-----------|
| BOND    | = | 27723.3847 | ANGLE   | = | 930.4472     | DIHED     | = | 5292.9322 |
| VDWAALS | = | 69098.4270 | EEL     | = | -484660.4658 | HBOND     | = | 0.0000    |
| 1-4 VDW | = | 1463.8385  | 1-4 EEL | = | 20376.8030   | RESTRAINT | = | 0.0000    |

|       |             |            |            |      |        |
|-------|-------------|------------|------------|------|--------|
| NSTEP | ENERGY      | RMS        | GMAX       | NAME | NUMBER |
| 4200  | -3.5987E+05 | 2.8711E-01 | 3.3497E+01 | NE2  | 2687   |

|         |   |            |         |   |              |           |   |           |
|---------|---|------------|---------|---|--------------|-----------|---|-----------|
| BOND    | = | 27748.2469 | ANGLE   | = | 930.9931     | DIHED     | = | 5292.9934 |
| VDWAALS | = | 69191.8753 | EEL     | = | -484877.0549 | HBOND     | = | 0.0000    |
| 1-4 VDW | = | 1463.6234  | 1-4 EEL | = | 20377.5125   | RESTRAINT | = | 0.0000    |

## Supplementary Text 3

| NSTEP | ENERGY      | RMS        | GMAX       | NAME | NUMBER |
|-------|-------------|------------|------------|------|--------|
| 4300  | -3.5997E+05 | 7.3571E-02 | 4.2971E+00 | NE2  | 2687   |

|           |            |           |              |             |           |
|-----------|------------|-----------|--------------|-------------|-----------|
| BOND =    | 27766.8385 | ANGLE =   | 929.8444     | DIHED =     | 5293.2808 |
| VDWAALS = | 69283.0656 | EEL =     | -485084.9309 | HBOND =     | 0.0000    |
| 1-4 VDW = | 1463.3472  | 1-4 EEL = | 20378.3734   | RESTRAINT = | 0.0000    |

| NSTEP | ENERGY      | RMS        | GMAX       | NAME | NUMBER |
|-------|-------------|------------|------------|------|--------|
| 4400  | -3.6006E+05 | 2.1425E-01 | 3.4098E+01 | CD   | 3234   |

|           |            |           |              |             |           |
|-----------|------------|-----------|--------------|-------------|-----------|
| BOND =    | 27790.2077 | ANGLE =   | 930.0020     | DIHED =     | 5293.4777 |
| VDWAALS = | 69377.4692 | EEL =     | -485298.0072 | HBOND =     | 0.0000    |
| 1-4 VDW = | 1463.1633  | 1-4 EEL = | 20379.1465   | RESTRAINT = | 0.0000    |

| NSTEP | ENERGY      | RMS        | GMAX       | NAME | NUMBER |
|-------|-------------|------------|------------|------|--------|
| 4500  | -3.6016E+05 | 1.7655E-01 | 2.2437E+01 | NE2  | 2687   |

|           |            |           |              |             |           |
|-----------|------------|-----------|--------------|-------------|-----------|
| BOND =    | 27810.8422 | ANGLE =   | 929.4957     | DIHED =     | 5293.5194 |
| VDWAALS = | 69468.2680 | EEL =     | -485502.9157 | HBOND =     | 0.0000    |
| 1-4 VDW = | 1463.0261  | 1-4 EEL = | 20379.6328   | RESTRAINT = | 0.0000    |

| NSTEP | ENERGY      | RMS        | GMAX       | NAME | NUMBER |
|-------|-------------|------------|------------|------|--------|
| 4600  | -3.6025E+05 | 9.2804E-02 | 8.5069E+00 | NE2  | 2687   |

|           |            |           |              |             |           |
|-----------|------------|-----------|--------------|-------------|-----------|
| BOND =    | 27830.5447 | ANGLE =   | 929.0364     | DIHED =     | 5293.5466 |
| VDWAALS = | 69556.9879 | EEL =     | -485703.9807 | HBOND =     | 0.0000    |
| 1-4 VDW = | 1462.9877  | 1-4 EEL = | 20380.0500   | RESTRAINT = | 0.0000    |

| NSTEP | ENERGY      | RMS        | GMAX       | NAME | NUMBER |
|-------|-------------|------------|------------|------|--------|
| 4700  | -3.6034E+05 | 7.3819E-02 | 5.0223E+00 | NE2  | 2687   |

|           |            |           |              |             |           |
|-----------|------------|-----------|--------------|-------------|-----------|
| BOND =    | 27850.0203 | ANGLE =   | 928.7309     | DIHED =     | 5293.7118 |
| VDWAALS = | 69642.4630 | EEL =     | -485897.1561 | HBOND =     | 0.0000    |
| 1-4 VDW = | 1462.8310  | 1-4 EEL = | 20380.3379   | RESTRAINT = | 0.0000    |

| NSTEP | ENERGY      | RMS        | GMAX       | NAME | NUMBER |
|-------|-------------|------------|------------|------|--------|
| 4800  | -3.6043E+05 | 7.9689E-02 | 6.7168E+00 | NE2  | 2687   |

|           |            |           |              |             |           |
|-----------|------------|-----------|--------------|-------------|-----------|
| BOND =    | 27869.5112 | ANGLE =   | 928.5959     | DIHED =     | 5293.9324 |
| VDWAALS = | 69728.2261 | EEL =     | -486090.7836 | HBOND =     | 0.0000    |
| 1-4 VDW = | 1462.6960  | 1-4 EEL = | 20380.6114   | RESTRAINT = | 0.0000    |

| NSTEP | ENERGY      | RMS        | GMAX       | NAME | NUMBER |
|-------|-------------|------------|------------|------|--------|
| 4900  | -3.6051E+05 | 2.2971E-01 | 2.8571E+01 | NE2  | 2687   |

|           |            |           |              |             |           |
|-----------|------------|-----------|--------------|-------------|-----------|
| BOND =    | 27890.1278 | ANGLE =   | 928.8873     | DIHED =     | 5294.1834 |
| VDWAALS = | 69812.6451 | EEL =     | -486279.9148 | HBOND =     | 0.0000    |
| 1-4 VDW = | 1462.6257  | 1-4 EEL = | 20380.8848   | RESTRAINT = | 0.0000    |

Supplementary Text 3

| NSTEP     | ENERGY      | RMS        | GMAX         | NAME        | NUMBER    |
|-----------|-------------|------------|--------------|-------------|-----------|
| 5000      | -3.6059E+05 | 1.9451E-01 | 2.4554E+01   | NE2         | 2687      |
| BOND =    | 27908.1261  | ANGLE =    | 928.1343     | DIHED =     | 5294.5330 |
| VDWAALS = | 69895.8320  | EEL =      | -486464.6504 | HBOND =     | 0.0000    |
| 1-4 VDW = | 1462.5575   | 1-4 EEL =  | 20381.2479   | RESTRAINT = | 0.0000    |

Maximum number of minimization cycles reached.

FINAL RESULTS

| NSTEP     | ENERGY      | RMS        | GMAX         | NAME        | NUMBER    |
|-----------|-------------|------------|--------------|-------------|-----------|
| 5000      | -3.6059E+05 | 1.9451E-01 | 2.4554E+01   | NE2         | 2687      |
| BOND =    | 27908.1261  | ANGLE =    | 928.1343     | DIHED =     | 5294.5330 |
| VDWAALS = | 69895.8320  | EEL =      | -486464.6504 | HBOND =     | 0.0000    |
| 1-4 VDW = | 1462.5575   | 1-4 EEL =  | 20381.2479   | RESTRAINT = | 0.0000    |

-----  
5. TIMINGS  
-----

|                     |                            |
|---------------------|----------------------------|
| Build the list      | 26.24 (91.22% of List )    |
| Other               | 2.53 ( 8.78% of List )     |
| List time           | 28.77 ( 0.17% of Nonbo)    |
| Short_ene time      | 8205.70 (99.68% of Direc)  |
| Other               | 26.35 ( 0.32% of Direc)    |
| Direct Ewald time   | 8232.05 (47.70% of Ewald)  |
| Adjust Ewald time   | 30.72 ( 0.18% of Ewald)    |
| Fill Bspline coeffs | 24.31 ( 0.27% of Recip)    |
| Fill charge grid    | 102.29 ( 1.14% of Recip)   |
| Scalar sum          | 140.77 ( 1.57% of Recip)   |
| Grad sum            | 8437.62 (93.87% of Recip)  |
| FFT time            | 283.53 ( 3.15% of Recip)   |
| Recip Ewald time    | 8988.53 (52.08% of Ewald)  |
| Virial junk         | 1.87 ( 0.01% of Ewald)     |
| Other               | 4.33 ( 0.03% of Ewald)     |
| Ewald time          | 17257.52 (99.83% of Nonbo) |
| Nonbond force       | 17286.30 (99.75% of Force) |
| Bond/Angle/Dihedral | 42.12 ( 0.24% of Force)    |
| Other               | 1.04 ( 0.01% of Force)     |
| Force time          | 17329.46 (100.0% of Runmd) |
| Runmd Time          | 17329.46 (99.85% of Total) |
| Other               | 26.33 ( 0.15% of Total)    |
| Total time          | 17355.86 (100.0% of ALL )  |

| Number of list builds : 19



Supplementary Text 3

```
| Highest rstack allocated: 4877674
| Highest irstack allocated: 89944
|           Job began at 04:29:15.661 on 02/21/2019
|           Setup done at 04:29:16.533 on 02/21/2019
|           Run done at 09:18:31.519 on 02/21/2019
| wallclock() was called 190086 times
```

```
-----
Amber 16 SANDER                               2016
-----
```

| Run on 02/21/2019 at 12:02:52

```
| Executable path: /usr/local/amber16/bin/sander
| Working directory: /Users/Swati
|           Hostname: Unknown
| [-O]verwriting output
```

File Assignments:

```
| MDIN: /Users/Swati/minimization_file_2.in
| MDOUT: /Users/Swati/LJP6_files_2/truncated_LJP6_min3_2.out
| INPCRD: /Users/Swati/LJP6_files_2/truncated_LJP6_min3_1.rst
| PARM: /Users/Swati/LJP6_files_2/LJP6.prmtop
| RESTRT: /Users/Swati/LJP6_files_2/truncated_LJP6_min3_2.rst
| REFC: refc
| MDVEL: mdvel
| MDFRC: mdfrc
| MDEN: mden
| MDCRD: mdcrd
| MDINFO: mdinfo
| MTMD: mtmd
| INPDIP: inpdip
| RSTDIP: rstcip
| INPTRAJ: inptraj
```

Here is the input file:

```
PROT: minimization_2
&cntrl
imin = 1,
maxcyc = 5000,
ncyc = 10000,
igb = 0,
ntpr = 100,
ntp = 0
cut = 12
&end
```

```
-----
1. RESOURCE USE:
-----
```

Supplementary Text 3

```
| Flags:
| getting box info from netcdf restart file
| NetCDF restart box info found
| Largest sphere to fit in unit cell has radius = 42.185
| New format PARM file being parsed.
| Version = 1.000 Date = 08/09/17 Time = 04:08:03
| NATOM = 87372 NTYPES = 17 NBONH = 83756 MBONA = 3718
| NTHETH = 7789 MTHETA = 5057 NPHIH = 16221 MPHIA = 15711
| NHPARM = 0 NPARM = 0 NNB = 145906 NRES = 27236
| NBONA = 3718 NTHETA = 5057 NPHIA = 15711 NUMBND = 67
| NUMANG = 152 NPTRA = 191 NATYP = 36 NPHB = 1
| IFBOX = 1 NMXRS = 24 IFCAP = 0 NEXTRA = 0
| NCOPY = 0
```

```
| Memory Use Allocated
| Real 6902375
| Hollerith 289354
| Integer 3534516
| Max Pairs 79916256
| nblastReal 1048464
| nblast Int 2924001
| Total 400647 kbytes
```

| Note: 1-4 EEL scale factors are being read from the topology file.

| Note: 1-4 VDW scale factors are being read from the topology file.

| Duplicated 0 dihedrals

| Duplicated 0 dihedrals

BOX TYPE: RECTILINEAR

-----  
2. CONTROL DATA FOR THE RUN  
-----

default\_name

General flags:

imin = 1, nmropt = 0

Nature and format of input:

ntx = 1, irest = 0, ntrx = 1

Nature and format of output:

ntxo = 2, ntp = 100, ntrx = 1, ntwr = 1  
iwrap = 0, ntwx = 0, ntwv = 0, ntwe = 0  
ioutfm = 1, ntwprt = 0, idecomp = 0, rbornstat = 0

Potential function:

ntf = 1, ntb = 1, igb = 0, nsnb = 25  
ipol = 0, gbsa = 0, iesp = 0  
dielc = 1.00000, cut = 12.00000, intdiel = 1.00000

Supplementary Text 3

Frozen or restrained atoms:

ibelly = 0, ntr = 0

Energy minimization:

maxcyc = 5000, ncyc = 10000, ntmin = 1  
 dx0 = 0.01000, drms = 0.00010

Ewald parameters:

verbose = 0, ew\_type = 0, nbflag = 1, use\_pme = 1  
 vdwmeth = 1, eedmeth = 1, netfrnc = 0  
 Box X = 117.910 Box Y = 84.370 Box Z = 105.320  
 Alpha = 90.000 Beta = 90.000 Gamma = 90.000  
 NFFT1 = 120 NFFT2 = 90 NFFT3 = 108  
 Cutoff= 12.000 Tol = 0.100E-04  
 Ewald Coefficient = 0.22664  
 Interpolation order = 4

| INFO: Old style inpcrd file read

-----  
 3. ATOMIC COORDINATES AND VELOCITIES  
 -----

default\_name

begin time read from input coords = 0.000 ps

Number of triangulated 3-point waters found: 26771

Sum of charges from parm topology file = -0.00000030  
 Forcing neutrality...

-----  
 4. RESULTS  
 -----

-----  
 APPROXIMATING switch and d/dx switch using CUBIC SPLINE INTERPOLATION  
 using 5000.0 points per unit in tabled values  
 TESTING RELATIVE ERROR over r ranging from 0.0 to cutoff

| CHECK switch(x): max rel err = 0.2738E-14 at 2.422500  
 | CHECK d/dx switch(x): max rel err = 0.7967E-11 at 2.716640

| Local SIZE OF NONBOND LIST = 42990561  
 | TOTAL SIZE OF NONBOND LIST = 42990561

| NSTEP     | ENERGY      | RMS        | GMAX         | NAME        | NUMBER    |
|-----------|-------------|------------|--------------|-------------|-----------|
| 1         | -3.2648E+05 | 4.4620E+00 | 7.3662E+02   | C           | 3764      |
| BOND =    | 36149.0277  | ANGLE =    | 2659.3115    | DIHED =     | 5394.6458 |
| VDWAALS = | 66891.9642  | EEL =      | -459857.9824 | HBOND =     | 0.0000    |
| 1-4 VDW = | 2117.0330   | 1-4 EEL =  | 20167.4574   | RESTRAINT = | 0.0000    |

## Supplementary Text 3

| NSTEP | ENERGY      | RMS        | GMAX       | NAME | NUMBER |
|-------|-------------|------------|------------|------|--------|
| 100   | -3.4060E+05 | 6.2106E-01 | 1.3272E+02 | CD   | 3231   |

|           |            |           |              |             |           |
|-----------|------------|-----------|--------------|-------------|-----------|
| BOND =    | 26923.6423 | ANGLE =   | 1568.8696    | DIHED =     | 5408.8239 |
| VDWAALS = | 64557.1993 | EEL =     | -460414.3375 | HBOND =     | 0.0000    |
| 1-4 VDW = | 1698.2596  | 1-4 EEL = | 19660.0467   | RESTRAINT = | 0.0000    |

| NSTEP | ENERGY      | RMS        | GMAX       | NAME | NUMBER |
|-------|-------------|------------|------------|------|--------|
| 200   | -3.4200E+05 | 7.7236E-01 | 2.1460E+02 | CD   | 3231   |

|           |            |           |              |             |           |
|-----------|------------|-----------|--------------|-------------|-----------|
| BOND =    | 26497.6987 | ANGLE =   | 1352.0073    | DIHED =     | 5349.4163 |
| VDWAALS = | 64510.0292 | EEL =     | -460926.7872 | HBOND =     | 0.0000    |
| 1-4 VDW = | 1605.2364  | 1-4 EEL = | 19614.0185   | RESTRAINT = | 0.0000    |

| NSTEP | ENERGY      | RMS        | GMAX       | NAME | NUMBER |
|-------|-------------|------------|------------|------|--------|
| 300   | -3.4271E+05 | 6.8305E-01 | 1.6928E+02 | CD   | 3231   |

|           |            |           |              |             |           |
|-----------|------------|-----------|--------------|-------------|-----------|
| BOND =    | 26395.6662 | ANGLE =   | 1232.6552    | DIHED =     | 5329.3898 |
| VDWAALS = | 64569.7896 | EEL =     | -461403.9473 | HBOND =     | 0.0000    |
| 1-4 VDW = | 1564.1965  | 1-4 EEL = | 19604.0078   | RESTRAINT = | 0.0000    |

| NSTEP | ENERGY      | RMS        | GMAX       | NAME | NUMBER |
|-------|-------------|------------|------------|------|--------|
| 400   | -3.4320E+05 | 5.8303E-01 | 1.0341E+02 | CD   | 2309   |

|           |            |           |              |             |           |
|-----------|------------|-----------|--------------|-------------|-----------|
| BOND =    | 26363.0651 | ANGLE =   | 1147.6336    | DIHED =     | 5319.7943 |
| VDWAALS = | 64671.5429 | EEL =     | -461845.3620 | HBOND =     | 0.0000    |
| 1-4 VDW = | 1539.1826  | 1-4 EEL = | 19605.4762   | RESTRAINT = | 0.0000    |

| NSTEP | ENERGY      | RMS        | GMAX       | NAME | NUMBER |
|-------|-------------|------------|------------|------|--------|
| 500   | -3.4359E+05 | 1.4666E-01 | 1.2756E+01 | CD   | 2309   |

|           |            |           |              |             |           |
|-----------|------------|-----------|--------------|-------------|-----------|
| BOND =    | 26352.1294 | ANGLE =   | 1087.3992    | DIHED =     | 5311.7066 |
| VDWAALS = | 64788.8793 | EEL =     | -462265.5709 | HBOND =     | 0.0000    |
| 1-4 VDW = | 1521.9374  | 1-4 EEL = | 19611.5782   | RESTRAINT = | 0.0000    |

| NSTEP | ENERGY      | RMS        | GMAX       | NAME | NUMBER |
|-------|-------------|------------|------------|------|--------|
| 600   | -3.4392E+05 | 3.7980E-01 | 3.8033E+01 | C    | 3778   |

|           |            |           |              |             |           |
|-----------|------------|-----------|--------------|-------------|-----------|
| BOND =    | 26367.8209 | ANGLE =   | 1052.6143    | DIHED =     | 5304.2604 |
| VDWAALS = | 64918.2934 | EEL =     | -462689.8453 | HBOND =     | 0.0000    |
| 1-4 VDW = | 1510.4032  | 1-4 EEL = | 19618.0880   | RESTRAINT = | 0.0000    |

| NSTEP | ENERGY      | RMS        | GMAX       | NAME | NUMBER |
|-------|-------------|------------|------------|------|--------|
| 700   | -3.4422E+05 | 3.2621E-01 | 5.7659E+01 | C    | 3778   |

|           |            |           |              |             |           |
|-----------|------------|-----------|--------------|-------------|-----------|
| BOND =    | 26382.9183 | ANGLE =   | 1033.6388    | DIHED =     | 5297.1536 |
| VDWAALS = | 65062.0022 | EEL =     | -463116.9104 | HBOND =     | 0.0000    |
| 1-4 VDW = | 1502.4715  | 1-4 EEL = | 19622.0635   | RESTRAINT = | 0.0000    |

## Supplementary Text 3

| NSTEP     | ENERGY      | RMS        | GMAX         | NAME        | NUMBER    |
|-----------|-------------|------------|--------------|-------------|-----------|
| 800       | -3.4448E+05 | 2.8480E-01 | 4.7931E+01   | C           | 3778      |
| BOND =    | 26409.3702  | ANGLE =    | 1017.7793    | DIHED =     | 5290.2470 |
| VDWAALS = | 65204.5772  | EEL =      | -463519.3186 | HBOND =     | 0.0000    |
| 1-4 VDW = | 1496.7465   | 1-4 EEL =  | 19625.1903   | RESTRAINT = | 0.0000    |

| NSTEP     | ENERGY      | RMS        | GMAX         | NAME        | NUMBER    |
|-----------|-------------|------------|--------------|-------------|-----------|
| 900       | -3.4471E+05 | 1.0826E-01 | 6.4968E+00   | C           | 3764      |
| BOND =    | 26431.1516  | ANGLE =    | 1009.4331    | DIHED =     | 5284.9138 |
| VDWAALS = | 65344.0906  | EEL =      | -463895.7200 | HBOND =     | 0.0000    |
| 1-4 VDW = | 1493.1978   | 1-4 EEL =  | 19626.4434   | RESTRAINT = | 0.0000    |

| NSTEP     | ENERGY      | RMS        | GMAX         | NAME        | NUMBER    |
|-----------|-------------|------------|--------------|-------------|-----------|
| 1000      | -3.4492E+05 | 1.6565E-01 | 2.3569E+01   | CE3         | 3293      |
| BOND =    | 26460.0928  | ANGLE =    | 1002.5586    | DIHED =     | 5281.1643 |
| VDWAALS = | 65482.6495  | EEL =      | -464261.7446 | HBOND =     | 0.0000    |
| 1-4 VDW = | 1490.4363   | 1-4 EEL =  | 19627.4617   | RESTRAINT = | 0.0000    |

| NSTEP     | ENERGY      | RMS        | GMAX         | NAME        | NUMBER    |
|-----------|-------------|------------|--------------|-------------|-----------|
| 1100      | -3.4511E+05 | 1.2459E-01 | 1.3834E+01   | CE3         | 3293      |
| BOND =    | 26486.7742  | ANGLE =    | 998.1471     | DIHED =     | 5278.3816 |
| VDWAALS = | 65611.5460  | EEL =      | -464597.9856 | HBOND =     | 0.0000    |
| 1-4 VDW = | 1488.1282   | 1-4 EEL =  | 19627.7368   | RESTRAINT = | 0.0000    |

| NSTEP     | ENERGY      | RMS        | GMAX         | NAME        | NUMBER    |
|-----------|-------------|------------|--------------|-------------|-----------|
| 1200      | -3.4528E+05 | 3.4377E-01 | 4.2185E+01   | CE3         | 3293      |
| BOND =    | 26518.0861  | ANGLE =    | 995.0684     | DIHED =     | 5276.5006 |
| VDWAALS = | 65736.9188  | EEL =      | -464923.8084 | HBOND =     | 0.0000    |
| 1-4 VDW = | 1486.1351   | 1-4 EEL =  | 19627.4402   | RESTRAINT = | 0.0000    |

| NSTEP     | ENERGY      | RMS        | GMAX         | NAME        | NUMBER    |
|-----------|-------------|------------|--------------|-------------|-----------|
| 1300      | -3.4545E+05 | 3.0200E-01 | 5.4765E+01   | CD          | 3231      |
| BOND =    | 26544.7795  | ANGLE =    | 991.0255     | DIHED =     | 5275.3691 |
| VDWAALS = | 65854.4218  | EEL =      | -465231.0297 | HBOND =     | 0.0000    |
| 1-4 VDW = | 1484.6102   | 1-4 EEL =  | 19626.8976   | RESTRAINT = | 0.0000    |

| NSTEP  | ENERGY      | RMS        | GMAX       | NAME    | NUMBER    |
|--------|-------------|------------|------------|---------|-----------|
| 1400   | -3.4562E+05 | 2.8895E-01 | 5.1999E+01 | CD      | 3231      |
| BOND = | 26571.3771  | ANGLE =    | 988.7225   | DIHED = | 5274.1737 |

Supplementary Text 3

VDWAALS = 65972.2163 EEL = -465537.4058 HBOND = 0.0000  
 1-4 VDW = 1483.2770 1-4 EEL = 19625.7474 RESTRAINT = 0.0000

NSTEP ENERGY RMS GMAX NAME NUMBER  
 1500 -3.4579E+05 1.6689E-01 1.6758E+01 CG 1665

BOND = 26596.9559 ANGLE = 985.7913 DIHED = 5273.0063  
 VDWAALS = 66085.0737 EEL = -465831.9439 HBOND = 0.0000  
 1-4 VDW = 1482.3057 1-4 EEL = 19623.7843 RESTRAINT = 0.0000

NSTEP ENERGY RMS GMAX NAME NUMBER  
 1600 -3.4594E+05 1.2292E-01 1.1621E+01 CD 3231

BOND = 26622.8836 ANGLE = 983.6852 DIHED = 5271.8127  
 VDWAALS = 66196.0323 EEL = -466116.7374 HBOND = 0.0000  
 1-4 VDW = 1481.4584 1-4 EEL = 19621.2646 RESTRAINT = 0.0000

NSTEP ENERGY RMS GMAX NAME NUMBER  
 1700 -3.4609E+05 9.3302E-02 4.7774E+00 CZ 1670

BOND = 26648.7818 ANGLE = 981.7191 DIHED = 5270.7631  
 VDWAALS = 66303.5196 EEL = -466392.7296 HBOND = 0.0000  
 1-4 VDW = 1480.6247 1-4 EEL = 19618.8036 RESTRAINT = 0.0000

NSTEP ENERGY RMS GMAX NAME NUMBER  
 1800 -3.4623E+05 3.6171E-01 7.6343E+01 CD 3231

BOND = 26679.2044 ANGLE = 980.2070 DIHED = 5270.1468  
 VDWAALS = 66408.6158 EEL = -466664.8559 HBOND = 0.0000  
 1-4 VDW = 1479.8266 1-4 EEL = 19616.3067 RESTRAINT = 0.0000

NSTEP ENERGY RMS GMAX NAME NUMBER  
 1900 -3.4638E+05 9.1529E-02 4.2000E+00 CZ 1670

BOND = 26699.7213 ANGLE = 978.4234 DIHED = 5269.5707  
 VDWAALS = 66510.7294 EEL = -466929.3312 HBOND = 0.0000  
 1-4 VDW = 1479.0883 1-4 EEL = 19613.8837 RESTRAINT = 0.0000

NSTEP ENERGY RMS GMAX NAME NUMBER  
 2000 -3.4651E+05 2.3658E-01 2.2007E+01 CG 1665

BOND = 26726.2894 ANGLE = 977.0274 DIHED = 5268.5579  
 VDWAALS = 66611.0936 EEL = -467187.6254 HBOND = 0.0000  
 1-4 VDW = 1478.3391 1-4 EEL = 19611.9851 RESTRAINT = 0.0000

NSTEP ENERGY RMS GMAX NAME NUMBER  
 2100 -3.4665E+05 2.0572E-01 1.7530E+01 NE2 4277

Supplementary Text 3

|         |   |            |         |   |              |           |   |           |
|---------|---|------------|---------|---|--------------|-----------|---|-----------|
| BOND    | = | 26749.4764 | ANGLE   | = | 975.7397     | DIHED     | = | 5267.5818 |
| VDWAALS | = | 66711.0546 | EEL     | = | -467442.3161 | HBOND     | = | 0.0000    |
| 1-4 VDW | = | 1477.5832  | 1-4 EEL | = | 19610.6054   | RESTRAINT | = | 0.0000    |

|       |             |            |            |      |        |
|-------|-------------|------------|------------|------|--------|
| NSTEP | ENERGY      | RMS        | GMAX       | NAME | NUMBER |
| 2200  | -3.4678E+05 | 1.2300E-01 | 1.3916E+01 | CD   | 3231   |

|         |   |            |         |   |              |           |   |           |
|---------|---|------------|---------|---|--------------|-----------|---|-----------|
| BOND    | = | 26771.4785 | ANGLE   | = | 974.3260     | DIHED     | = | 5266.9597 |
| VDWAALS | = | 66806.6277 | EEL     | = | -467683.7994 | HBOND     | = | 0.0000    |
| 1-4 VDW | = | 1476.8559  | 1-4 EEL | = | 19609.7682   | RESTRAINT | = | 0.0000    |

|       |             |            |            |      |        |
|-------|-------------|------------|------------|------|--------|
| NSTEP | ENERGY      | RMS        | GMAX       | NAME | NUMBER |
| 2300  | -3.4690E+05 | 8.8033E-02 | 4.0194E+00 | CE1  | 3805   |

|         |   |            |         |   |              |           |   |           |
|---------|---|------------|---------|---|--------------|-----------|---|-----------|
| BOND    | = | 26793.8936 | ANGLE   | = | 973.2777     | DIHED     | = | 5266.7557 |
| VDWAALS | = | 66903.1107 | EEL     | = | -467925.5079 | HBOND     | = | 0.0000    |
| 1-4 VDW | = | 1476.0618  | 1-4 EEL | = | 19609.0067   | RESTRAINT | = | 0.0000    |

|       |             |            |            |      |        |
|-------|-------------|------------|------------|------|--------|
| NSTEP | ENERGY      | RMS        | GMAX       | NAME | NUMBER |
| 2400  | -3.4703E+05 | 9.9168E-02 | 6.3925E+00 | NE2  | 4277   |

|         |   |            |         |   |              |           |   |           |
|---------|---|------------|---------|---|--------------|-----------|---|-----------|
| BOND    | = | 26816.7042 | ANGLE   | = | 972.3388     | DIHED     | = | 5267.1167 |
| VDWAALS | = | 66999.3025 | EEL     | = | -468166.7445 | HBOND     | = | 0.0000    |
| 1-4 VDW | = | 1475.2995  | 1-4 EEL | = | 19608.4316   | RESTRAINT | = | 0.0000    |

|       |             |            |            |      |        |
|-------|-------------|------------|------------|------|--------|
| NSTEP | ENERGY      | RMS        | GMAX       | NAME | NUMBER |
| 2500  | -3.4715E+05 | 2.7355E-01 | 2.4149E+01 | CE1  | 3805   |

|         |   |            |         |   |              |           |   |           |
|---------|---|------------|---------|---|--------------|-----------|---|-----------|
| BOND    | = | 26841.0923 | ANGLE   | = | 971.8678     | DIHED     | = | 5268.2662 |
| VDWAALS | = | 67091.7688 | EEL     | = | -468400.7551 | HBOND     | = | 0.0000    |
| 1-4 VDW | = | 1474.5809  | 1-4 EEL | = | 19608.0848   | RESTRAINT | = | 0.0000    |

|       |             |            |            |      |        |
|-------|-------------|------------|------------|------|--------|
| NSTEP | ENERGY      | RMS        | GMAX       | NAME | NUMBER |
| 2600  | -3.4726E+05 | 2.4630E-01 | 4.3352E+01 | CD   | 3231   |

|         |   |            |         |   |              |           |   |           |
|---------|---|------------|---------|---|--------------|-----------|---|-----------|
| BOND    | = | 26861.4176 | ANGLE   | = | 971.4684     | DIHED     | = | 5269.5810 |
| VDWAALS | = | 67183.9304 | EEL     | = | -468630.2856 | HBOND     | = | 0.0000    |
| 1-4 VDW | = | 1473.9361  | 1-4 EEL | = | 19606.9981   | RESTRAINT | = | 0.0000    |

|       |             |            |            |      |        |
|-------|-------------|------------|------------|------|--------|
| NSTEP | ENERGY      | RMS        | GMAX       | NAME | NUMBER |
| 2700  | -3.4738E+05 | 2.0281E-01 | 1.8575E+01 | CE1  | 3805   |

|         |   |            |         |   |              |           |   |           |
|---------|---|------------|---------|---|--------------|-----------|---|-----------|
| BOND    | = | 26882.3431 | ANGLE   | = | 970.7817     | DIHED     | = | 5270.3541 |
| VDWAALS | = | 67274.2643 | EEL     | = | -468857.4501 | HBOND     | = | 0.0000    |
| 1-4 VDW | = | 1473.3011  | 1-4 EEL | = | 19606.4151   | RESTRAINT | = | 0.0000    |

## Supplementary Text 3

| NSTEP     | ENERGY      | RMS        | GMAX         | NAME        | NUMBER    |
|-----------|-------------|------------|--------------|-------------|-----------|
| 2800      | -3.4750E+05 | 1.2340E-01 | 1.0326E+01   | CG          | 3216      |
| BOND =    | 26902.3913  | ANGLE =    | 970.4593     | DIHED =     | 5268.0970 |
| VDWAALS = | 67365.1851  | EEL =      | -469084.1496 | HBOND =     | 0.0000    |
| 1-4 VDW = | 1472.4758   | 1-4 EEL =  | 19605.8274   | RESTRAINT = | 0.0000    |

| NSTEP     | ENERGY      | RMS        | GMAX         | NAME        | NUMBER    |
|-----------|-------------|------------|--------------|-------------|-----------|
| 2900      | -3.4761E+05 | 1.3480E-01 | 1.2941E+01   | NE2         | 4277      |
| BOND =    | 26923.4534  | ANGLE =    | 969.9944     | DIHED =     | 5267.7358 |
| VDWAALS = | 67454.3995  | EEL =      | -469300.8215 | HBOND =     | 0.0000    |
| 1-4 VDW = | 1471.8941   | 1-4 EEL =  | 19605.5292   | RESTRAINT = | 0.0000    |

| NSTEP     | ENERGY      | RMS        | GMAX         | NAME        | NUMBER    |
|-----------|-------------|------------|--------------|-------------|-----------|
| 3000      | -3.4771E+05 | 7.4287E-02 | 3.1739E+00   | NE2         | 4277      |
| BOND =    | 26942.9708  | ANGLE =    | 969.7152     | DIHED =     | 5267.4567 |
| VDWAALS = | 67541.6150  | EEL =      | -469510.7864 | HBOND =     | 0.0000    |
| 1-4 VDW = | 1471.4196   | 1-4 EEL =  | 19605.1413   | RESTRAINT = | 0.0000    |

| NSTEP     | ENERGY      | RMS        | GMAX         | NAME        | NUMBER    |
|-----------|-------------|------------|--------------|-------------|-----------|
| 3100      | -3.4781E+05 | 2.5958E-01 | 3.0057E+01   | NE2         | 4277      |
| BOND =    | 26964.7716  | ANGLE =    | 969.8831     | DIHED =     | 5267.0999 |
| VDWAALS = | 67626.5072  | EEL =      | -469713.9406 | HBOND =     | 0.0000    |
| 1-4 VDW = | 1471.0129   | 1-4 EEL =  | 19604.7974   | RESTRAINT = | 0.0000    |

| NSTEP     | ENERGY      | RMS        | GMAX         | NAME        | NUMBER    |
|-----------|-------------|------------|--------------|-------------|-----------|
| 3200      | -3.4791E+05 | 2.2658E-01 | 3.6526E+01   | CD          | 3231      |
| BOND =    | 26984.1144  | ANGLE =    | 968.9749     | DIHED =     | 5266.6164 |
| VDWAALS = | 67709.5848  | EEL =      | -469913.4681 | HBOND =     | 0.0000    |
| 1-4 VDW = | 1470.6812   | 1-4 EEL =  | 19604.7350   | RESTRAINT = | 0.0000    |

| NSTEP     | ENERGY      | RMS        | GMAX         | NAME        | NUMBER    |
|-----------|-------------|------------|--------------|-------------|-----------|
| 3300      | -3.4800E+05 | 2.0546E-01 | 2.2739E+01   | NE2         | 4277      |
| BOND =    | 27002.1510  | ANGLE =    | 968.9363     | DIHED =     | 5266.1040 |
| VDWAALS = | 67788.4473  | EEL =      | -470104.9372 | HBOND =     | 0.0000    |
| 1-4 VDW = | 1470.3544   | 1-4 EEL =  | 19604.6139   | RESTRAINT = | 0.0000    |

| NSTEP     | ENERGY      | RMS        | GMAX         | NAME        | NUMBER    |
|-----------|-------------|------------|--------------|-------------|-----------|
| 3400      | -3.4810E+05 | 1.3043E-01 | 1.3502E+01   | NE2         | 4277      |
| BOND =    | 27020.4102  | ANGLE =    | 968.2175     | DIHED =     | 5265.5456 |
| VDWAALS = | 67866.0296  | EEL =      | -470295.0620 | HBOND =     | 0.0000    |
| 1-4 VDW = | 1470.0864   | 1-4 EEL =  | 19604.8411   | RESTRAINT = | 0.0000    |



Supplementary Text 3

| NSTEP     | ENERGY      | RMS        | GMAX         | NAME        | NUMBER    |
|-----------|-------------|------------|--------------|-------------|-----------|
| 3500      | -3.4819E+05 | 6.9864E-02 | 2.7520E+00   | NE2         | 4277      |
| BOND =    | 27038.5407  | ANGLE =    | 967.9475     | DIHED =     | 5264.8434 |
| VDWAALS = | 67941.9742  | EEL =      | -470481.1142 | HBOND =     | 0.0000    |
| 1-4 VDW = | 1469.8078   | 1-4 EEL =  | 19604.7990   | RESTRAINT = | 0.0000    |

| NSTEP     | ENERGY      | RMS        | GMAX         | NAME        | NUMBER    |
|-----------|-------------|------------|--------------|-------------|-----------|
| 3600      | -3.4829E+05 | 7.0653E-02 | 2.8802E+00   | NE2         | 4277      |
| BOND =    | 27057.2044  | ANGLE =    | 967.6987     | DIHED =     | 5264.1806 |
| VDWAALS = | 68016.8331  | EEL =      | -470665.9241 | HBOND =     | 0.0000    |
| 1-4 VDW = | 1469.4970   | 1-4 EEL =  | 19604.6754   | RESTRAINT = | 0.0000    |

| NSTEP     | ENERGY      | RMS        | GMAX         | NAME        | NUMBER    |
|-----------|-------------|------------|--------------|-------------|-----------|
| 3700      | -3.4837E+05 | 2.5765E-01 | 3.8031E+01   | CD          | 3231      |
| BOND =    | 27077.9999  | ANGLE =    | 967.7479     | DIHED =     | 5263.6106 |
| VDWAALS = | 68090.4415  | EEL =      | -470848.0506 | HBOND =     | 0.0000    |
| 1-4 VDW = | 1469.1901   | 1-4 EEL =  | 19604.5269   | RESTRAINT = | 0.0000    |

| NSTEP     | ENERGY      | RMS        | GMAX         | NAME        | NUMBER    |
|-----------|-------------|------------|--------------|-------------|-----------|
| 3800      | -3.4847E+05 | 2.2048E-01 | 3.1478E+01   | CD          | 3231      |
| BOND =    | 27094.9451  | ANGLE =    | 967.8412     | DIHED =     | 5263.1438 |
| VDWAALS = | 68162.2888  | EEL =      | -471026.4877 | HBOND =     | 0.0000    |
| 1-4 VDW = | 1468.8254   | 1-4 EEL =  | 19604.1827   | RESTRAINT = | 0.0000    |

| NSTEP     | ENERGY      | RMS        | GMAX         | NAME        | NUMBER    |
|-----------|-------------|------------|--------------|-------------|-----------|
| 3900      | -3.4855E+05 | 1.8172E-01 | 1.7269E+01   | CD          | 3231      |
| BOND =    | 27112.9626  | ANGLE =    | 967.5811     | DIHED =     | 5262.7221 |
| VDWAALS = | 68235.8586  | EEL =      | -471206.2842 | HBOND =     | 0.0000    |
| 1-4 VDW = | 1468.5240   | 1-4 EEL =  | 19604.0975   | RESTRAINT = | 0.0000    |

| NSTEP     | ENERGY      | RMS        | GMAX         | NAME        | NUMBER    |
|-----------|-------------|------------|--------------|-------------|-----------|
| 4000      | -3.4864E+05 | 1.0695E-01 | 9.6503E+00   | NE2         | 4277      |
| BOND =    | 27130.2050  | ANGLE =    | 967.7138     | DIHED =     | 5262.3512 |
| VDWAALS = | 68310.2895  | EEL =      | -471384.8043 | HBOND =     | 0.0000    |
| 1-4 VDW = | 1468.1709   | 1-4 EEL =  | 19603.9577   | RESTRAINT = | 0.0000    |

| NSTEP  | ENERGY      | RMS        | GMAX       | NAME    | NUMBER    |
|--------|-------------|------------|------------|---------|-----------|
| 4100   | -3.4873E+05 | 1.2404E-01 | 1.2289E+01 | NE2     | 4277      |
| BOND = | 27148.4205  | ANGLE =    | 967.5636   | DIHED = | 5262.0253 |

## Supplementary Text 3

VDWAALS = 68383.0841 EEL = -471559.1192 HBOND = 0.0000  
 1-4 VDW = 1467.9159 1-4 EEL = 19604.0203 RESTRAINT = 0.0000

NSTEP ENERGY RMS GMAX NAME NUMBER  
 4200 -3.4881E+05 9.6300E-02 9.0546E+00 NE2 4277

BOND = 27165.1744 ANGLE = 967.6734 DIHED = 5261.8014  
 VDWAALS = 68452.7510 EEL = -471726.1793 HBOND = 0.0000  
 1-4 VDW = 1467.7097 1-4 EEL = 19603.9879 RESTRAINT = 0.0000

NSTEP ENERGY RMS GMAX NAME NUMBER  
 4300 -3.4888E+05 2.5289E-01 3.7627E+01 CD 3231

BOND = 27183.7208 ANGLE = 967.9507 DIHED = 5261.6963  
 VDWAALS = 68520.3363 EEL = -471889.0819 HBOND = 0.0000  
 1-4 VDW = 1467.5138 1-4 EEL = 19603.9510 RESTRAINT = 0.0000

NSTEP ENERGY RMS GMAX NAME NUMBER  
 4400 -3.4896E+05 6.5908E-02 3.0517E+00 NE2 4277

BOND = 27197.8904 ANGLE = 967.5960 DIHED = 5261.7182  
 VDWAALS = 68587.2483 EEL = -472048.7466 HBOND = 0.0000  
 1-4 VDW = 1467.3635 1-4 EEL = 19603.9363 RESTRAINT = 0.0000

NSTEP ENERGY RMS GMAX NAME NUMBER  
 4500 -3.4904E+05 1.8788E-01 1.9282E+01 CE1 3805

BOND = 27214.7405 ANGLE = 967.9593 DIHED = 5261.9303  
 VDWAALS = 68652.7409 EEL = -472204.3973 HBOND = 0.0000  
 1-4 VDW = 1467.1902 1-4 EEL = 19603.7123 RESTRAINT = 0.0000

NSTEP ENERGY RMS GMAX NAME NUMBER  
 4600 -3.4911E+05 1.4908E-01 1.5097E+01 NE2 4277

BOND = 27229.8672 ANGLE = 967.7202 DIHED = 5262.3635  
 VDWAALS = 68715.6209 EEL = -472355.8674 HBOND = 0.0000  
 1-4 VDW = 1467.0266 1-4 EEL = 19603.4986 RESTRAINT = 0.0000

NSTEP ENERGY RMS GMAX NAME NUMBER  
 4700 -3.4918E+05 6.2037E-02 2.5142E+00 H2 50427

BOND = 27243.9090 ANGLE = 967.9383 DIHED = 5262.9719  
 VDWAALS = 68777.0871 EEL = -472505.3085 HBOND = 0.0000  
 1-4 VDW = 1466.8564 1-4 EEL = 19603.0514 RESTRAINT = 0.0000

NSTEP ENERGY RMS GMAX NAME NUMBER  
 4800 -3.4926E+05 6.3348E-02 2.9948E+00 NE2 4277

### Supplementary Text 3

```

BOND      = 27258.7432  ANGLE   = 967.9374  DIHED     = 5263.4251
VDWAALS   = 68838.9422  EEL     = -472654.0098  HBOND     = 0.0000
1-4 VDW   = 1466.7231  1-4 EEL = 19602.7008  RESTRAINT = 0.0000
  
```

```

NSTEP      ENERGY          RMS           GMAX          NAME      NUMBER
4900      -3.4932E+05      2.2864E-01    2.7341E+01    NE2       4277
  
```

```

BOND      = 27275.5046  ANGLE   = 967.8371  DIHED     = 5263.5070
VDWAALS   = 68900.5214  EEL     = -472800.6770  HBOND     = 0.0000
1-4 VDW   = 1466.6135  1-4 EEL = 19602.5027  RESTRAINT = 0.0000
  
```

```

NSTEP      ENERGY          RMS           GMAX          NAME      NUMBER
5000      -3.4939E+05      1.8539E-01    2.3386E+01    NE2       4277
  
```

```

BOND      = 27288.8469  ANGLE   = 968.1360  DIHED     = 5263.3696
VDWAALS   = 68961.7778  EEL     = -472945.1878  HBOND     = 0.0000
1-4 VDW   = 1466.5092  1-4 EEL = 19602.1465  RESTRAINT = 0.0000
  
```

Maximum number of minimization cycles reached.

### FINAL RESULTS

```

NSTEP      ENERGY          RMS           GMAX          NAME      NUMBER
5000      -3.4939E+05      1.8539E-01    2.3386E+01    NE2       4277
  
```

```

BOND      = 27288.8469  ANGLE   = 968.1360  DIHED     = 5263.3696
VDWAALS   = 68961.7778  EEL     = -472945.1878  HBOND     = 0.0000
1-4 VDW   = 1466.5092  1-4 EEL = 19602.1465  RESTRAINT = 0.0000
  
```

---

### 5. TIMINGS

---

```

|          Build the list          27.75 (92.22% of List )
|          Other                   2.34 ( 7.78% of List )
| List time                       30.09 ( 0.32% of Nonbo)
|   Short_ene time                 8417.60 (99.68% of Direc)
|   Other                          26.69 ( 0.32% of Direc)
| Direct Ewald time                8444.29 (91.34% of Ewald)
| Adjust Ewald time                32.43 ( 0.35% of Ewald)
|   Fill Bspline coeffs           26.41 ( 3.47% of Recip)
|   Fill charge grid              104.54 (13.72% of Recip)
|   Scalar sum                    148.86 (19.54% of Recip)
|   Grad sum                      184.30 (24.19% of Recip)
|   FFT time                      297.80 (39.08% of Recip)
| Recip Ewald time                 761.93 ( 8.24% of Ewald)
| Virial junk                      1.92 ( 0.02% of Ewald)
  
```

Supplementary Text 3

|  |                     |                           |
|--|---------------------|---------------------------|
|  | Other               | 4.58 ( 0.05% of Ewald)    |
|  | Ewald time          | 9245.17 (99.68% of Nonbo) |
|  | Nonbond force       | 9275.27 (99.52% of Force) |
|  | Bond/Angle/Dihedral | 43.86 ( 0.47% of Force)   |
|  | Other               | 1.00 ( 0.01% of Force)    |
|  | Force time          | 9320.14 (100.0% of Runmd) |
|  | Runmd Time          | 9320.14 (99.72% of Total) |
|  | Other               | 26.07 ( 0.28% of Total)   |
|  | Total time          | 9346.23 (100.0% of ALL )  |

| Number of list builds : 20

| Highest rstack allocated: 4808230  
 | Highest istack allocated: 87372  
 | Job began at 12:02:52.833 on 02/21/2019  
 | Setup done at 12:02:53.500 on 02/21/2019  
 | Run done at 14:38:39.064 on 02/21/2019  
 | wallclock() was called 190088 times

-----  
 Amber 16 SANDER

2016  
 -----

| Run on 02/21/2019 at 17:36:44

| Executable path: /usr/local/amber16/bin/sander  
 | Working directory: /Users/Swati  
 | Hostname: Unknown  
 | [-O]verwriting output

File Assignments:

| MDIN: /Users/Swati/minimization\_file\_2.in  
 | MDOUT: /Users/Swati/NAT0\_files\_2/truncated\_NAT0\_min3\_2.out  
 | INPCRD: /Users/Swati/NAT0\_files\_2/truncated\_NAT0\_min3\_1.rst  
 | PARM: /Users/Swati/NAT0\_files\_2/NAT0.prmtop  
 | RESTR: /Users/Swati/NAT0\_files\_2/truncated\_NAT0\_min3\_2.rst  
 | REFC: refc  
 | MDVEL: mdvel  
 | MDFRC: mdfrc  
 | MDEN: mden  
 | MDCRD: mdcrd  
 | MDINFO: mdinfo  
 | MTMD: mtmd  
 | INPDIP: inpdip  
 | RSTDIP: rstcip  
 | INPTRA: inptraj

Here is the input file:

PROT: minimization\_2  
 &cntrl  
 imin = 1,  
 maxcyc = 5000,

### Supplementary Text 3

```
ncyc = 10000,  
igb = 0,  
ntpr = 100,  
ntp = 0  
cut = 12  
&end
```

---

#### 1. RESOURCE USE:

---

```
| Flags:  
| getting box info from netcdf restart file  
| NetCDF restart box info found  
| Largest sphere to fit in unit cell has radius = 44.861  
| New format PARM file being parsed.  
| Version = 1.000 Date = 08/09/17 Time = 07:09:32  
| NATOM = 65080 NTYPES = 17 NBONH = 61577 MBONA = 3583  
| NTHETH = 7353 MTHETA = 4865 NPHIH = 15405 MPHIA = 14966  
| NHPARM = 0 NPARM = 0 NNB = 114677 NRES = 19909  
| NBONA = 3583 NTHETA = 4865 NPHIA = 14966 NUMBND = 67  
| NUMANG = 151 NPTRA = 191 NATYP = 36 NPHB = 1  
| IFBOX = 1 NMXRS = 24 IFCAP = 0 NEXTRA = 0  
| NCOPY = 0
```

```
| Memory Use Allocated  
| Real 5163211  
| Hollerith 215151  
| Integer 2953777  
| Max Pairs 59526506  
| nblastReal 780960  
| nblast Int 2187281  
| Total 299886 kbytes
```

```
| Note: 1-4 EEL scale factors are being read from the topology file.
```

```
| Note: 1-4 VDW scale factors are being read from the topology file.
```

```
| Duplicated 0 dihedrals
```

```
| Duplicated 0 dihedrals
```

BOX TYPE: RECTILINEAR

---

#### 2. CONTROL DATA FOR THE RUN

---

default\_name

General flags:

```
imin = 1, nmropt = 0
```

Nature and format of input:

Supplementary Text 3

ntx = 1, irest = 0, ntrx = 1

Nature and format of output:

ntxo = 2, ntrp = 100, ntrx = 1, ntwr = 1  
 iwrap = 0, ntwx = 0, ntwv = 0, ntwe = 0  
 ioutfm = 1, ntwprt = 0, idecomp = 0, rbornstat= 0

Potential function:

ntf = 1, ntb = 1, igb = 0, nsnb = 25  
 ipol = 0, gbsa = 0, iesp = 0  
 dielc = 1.00000, cut = 12.00000, intdiel = 1.00000

Frozen or restrained atoms:

ibelly = 0, ntr = 0

Energy minimization:

maxcyc = 5000, ncyc = 10000, ntmin = 1  
 dx0 = 0.01000, drms = 0.00010

Ewald parameters:

verbose = 0, ew\_type = 0, nbflag = 1, use\_pme = 1  
 vdwmeth = 1, eedmeth = 1, netfrc = 0  
 Box X = 97.446 Box Y = 89.722 Box Z = 90.199  
 Alpha = 90.000 Beta = 90.000 Gamma = 90.000  
 NFFT1 = 100 NFFT2 = 90 NFFT3 = 90  
 Cutoff= 12.000 Tol =0.100E-04  
 Ewald Coefficient = 0.22664  
 Interpolation order = 4

| INFO: Old style inpcrd file read

-----  
 3. ATOMIC COORDINATES AND VELOCITIES  
 -----

default\_name

begin time read from input coords = 0.000 ps

Number of triangulated 3-point waters found: 19440

Sum of charges from parm topology file = -0.00000033

Forcing neutrality...

-----  
 4. RESULTS  
 -----

-----  
 APPROXIMATING switch and d/dx switch using CUBIC SPLINE INTERPOLATION

using 5000.0 points per unit in tabled values

TESTING RELATIVE ERROR over r ranging from 0.0 to cutoff

| CHECK switch(x): max rel err = 0.2738E-14 at 2.422500

| CHECK d/dx switch(x): max rel err = 0.7967E-11 at 2.716640  
 -----

## Supplementary Text 3

| Local SIZE OF NONBOND LIST = 31615604  
 | TOTAL SIZE OF NONBOND LIST = 31615604

| NSTEP     | ENERGY      | RMS        | GMAX         | NAME        | NUMBER    |
|-----------|-------------|------------|--------------|-------------|-----------|
| 1         | -2.3729E+05 | 5.0938E+00 | 7.4715E+02   | C           | 3693      |
| BOND =    | 28585.6938  | ANGLE =    | 2442.4317    | DIHED =     | 4978.7907 |
| VDWAALS = | 47953.8265  | EEL =      | -342825.6076 | HBOND =     | 0.0000    |
| 1-4 VDW = | 2043.3985   | 1-4 EEL =  | 19532.0386   | RESTRAINT = | 0.0000    |

| NSTEP     | ENERGY      | RMS        | GMAX         | NAME        | NUMBER    |
|-----------|-------------|------------|--------------|-------------|-----------|
| 100       | -2.5048E+05 | 4.5926E-01 | 3.5916E+01   | C           | 3693      |
| BOND =    | 19947.3321  | ANGLE =    | 1548.1980    | DIHED =     | 5039.9904 |
| VDWAALS = | 45641.8821  | EEL =      | -343221.3344 | HBOND =     | 0.0000    |
| 1-4 VDW = | 1622.3101   | 1-4 EEL =  | 18938.1554   | RESTRAINT = | 0.0000    |

| NSTEP     | ENERGY      | RMS        | GMAX         | NAME        | NUMBER    |
|-----------|-------------|------------|--------------|-------------|-----------|
| 200       | -2.5210E+05 | 7.5401E-01 | 1.1553E+02   | C           | 3693      |
| BOND =    | 19341.2335  | ANGLE =    | 1278.7278    | DIHED =     | 5025.6976 |
| VDWAALS = | 45582.9834  | EEL =      | -343690.6421 | HBOND =     | 0.0000    |
| 1-4 VDW = | 1516.2520   | 1-4 EEL =  | 18848.3444   | RESTRAINT = | 0.0000    |

| NSTEP     | ENERGY      | RMS        | GMAX         | NAME        | NUMBER    |
|-----------|-------------|------------|--------------|-------------|-----------|
| 300       | -2.5281E+05 | 2.0389E-01 | 1.5748E+01   | C           | 3693      |
| BOND =    | 19180.7572  | ANGLE =    | 1176.6028    | DIHED =     | 5009.2266 |
| VDWAALS = | 45630.1284  | EEL =      | -344104.9118 | HBOND =     | 0.0000    |
| 1-4 VDW = | 1478.9464   | 1-4 EEL =  | 18820.9000   | RESTRAINT = | 0.0000    |

| NSTEP     | ENERGY      | RMS        | GMAX         | NAME        | NUMBER    |
|-----------|-------------|------------|--------------|-------------|-----------|
| 400       | -2.5324E+05 | 1.7517E-01 | 1.4872E+01   | C           | 3693      |
| BOND =    | 19133.7180  | ANGLE =    | 1121.6991    | DIHED =     | 4997.7892 |
| VDWAALS = | 45701.8446  | EEL =      | -344461.4214 | HBOND =     | 0.0000    |
| 1-4 VDW = | 1459.8386   | 1-4 EEL =  | 18808.5995   | RESTRAINT = | 0.0000    |

| NSTEP     | ENERGY      | RMS        | GMAX         | NAME        | NUMBER    |
|-----------|-------------|------------|--------------|-------------|-----------|
| 500       | -2.5355E+05 | 4.7329E-01 | 7.2942E+01   | C           | 3693      |
| BOND =    | 19128.0608  | ANGLE =    | 1088.6742    | DIHED =     | 4993.6844 |
| VDWAALS = | 45786.1896  | EEL =      | -344799.4563 | HBOND =     | 0.0000    |
| 1-4 VDW = | 1447.9195   | 1-4 EEL =  | 18801.6533   | RESTRAINT = | 0.0000    |

| NSTEP | ENERGY      | RMS        | GMAX       | NAME | NUMBER |
|-------|-------------|------------|------------|------|--------|
| 600   | -2.5382E+05 | 3.9844E-01 | 5.4750E+01 | C    | 3693   |

Supplementary Text 3

BOND = 19126.5551 ANGLE = 1070.1137 DIHED = 4990.8832  
 VDWAALS = 45875.1357 EEL = -345117.7008 HBOND = 0.0000  
 1-4 VDW = 1439.4902 1-4 EEL = 18795.7758 RESTRAINT = 0.0000

NSTEP ENERGY RMS GMAX NAME NUMBER  
 700 -2.5405E+05 3.7197E-01 5.1310E+01 C 3693

BOND = 19139.6031 ANGLE = 1054.0001 DIHED = 4987.3849  
 VDWAALS = 45965.5959 EEL = -345425.9048 HBOND = 0.0000  
 1-4 VDW = 1432.7050 1-4 EEL = 18792.7068 RESTRAINT = 0.0000

NSTEP ENERGY RMS GMAX NAME NUMBER  
 800 -2.5426E+05 3.0274E-01 3.8816E+01 C 3693

BOND = 19151.1553 ANGLE = 1044.8119 DIHED = 4988.4247  
 VDWAALS = 46057.9873 EEL = -345722.8119 HBOND = 0.0000  
 1-4 VDW = 1427.2656 1-4 EEL = 18790.0595 RESTRAINT = 0.0000

NSTEP ENERGY RMS GMAX NAME NUMBER  
 900 -2.5446E+05 2.0526E-01 2.2304E+01 CA 3697

BOND = 19168.1819 ANGLE = 1036.7133 DIHED = 4987.6238  
 VDWAALS = 46148.3345 EEL = -346010.0011 HBOND = 0.0000  
 1-4 VDW = 1422.9260 1-4 EEL = 18788.2307 RESTRAINT = 0.0000

NSTEP ENERGY RMS GMAX NAME NUMBER  
 1000 -2.5464E+05 1.1422E-01 5.8816E+00 C 3707

BOND = 19185.3412 ANGLE = 1031.1800 DIHED = 4985.2251  
 VDWAALS = 46237.2713 EEL = -346284.0687 HBOND = 0.0000  
 1-4 VDW = 1419.5525 1-4 EEL = 18785.8113 RESTRAINT = 0.0000

NSTEP ENERGY RMS GMAX NAME NUMBER  
 1100 -2.5481E+05 1.0674E-01 4.6692E+00 N 3695

BOND = 19204.4187 ANGLE = 1026.4402 DIHED = 4983.5029  
 VDWAALS = 46323.8608 EEL = -346544.6668 HBOND = 0.0000  
 1-4 VDW = 1417.1359 1-4 EEL = 18783.6136 RESTRAINT = 0.0000

NSTEP ENERGY RMS GMAX NAME NUMBER  
 1200 -2.5496E+05 4.3881E-01 8.3362E+01 CD 3153

BOND = 19229.2372 ANGLE = 1023.2889 DIHED = 4983.4150  
 VDWAALS = 46411.2339 EEL = -346802.2012 HBOND = 0.0000  
 1-4 VDW = 1415.4418 1-4 EEL = 18781.7179 RESTRAINT = 0.0000



## Supplementary Text 3

| NSTEP | ENERGY      | RMS        | GMAX       | NAME | NUMBER |
|-------|-------------|------------|------------|------|--------|
| 1300  | -2.5511E+05 | 3.2445E-01 | 3.9888E+01 | CA   | 3697   |

|           |            |           |              |             |           |
|-----------|------------|-----------|--------------|-------------|-----------|
| BOND =    | 19246.4908 | ANGLE =   | 1020.4848    | DIHED =     | 4982.4567 |
| VDWAALS = | 46498.8281 | EEL =     | -347054.0654 | HBOND =     | 0.0000    |
| 1-4 VDW = | 1413.9343  | 1-4 EEL = | 18779.6000   | RESTRAINT = | 0.0000    |

| NSTEP | ENERGY      | RMS        | GMAX       | NAME | NUMBER |
|-------|-------------|------------|------------|------|--------|
| 1400  | -2.5526E+05 | 2.8238E-01 | 3.7812E+01 | CA   | 3697   |

|           |            |           |              |             |           |
|-----------|------------|-----------|--------------|-------------|-----------|
| BOND =    | 19267.7220 | ANGLE =   | 1017.7156    | DIHED =     | 4979.3180 |
| VDWAALS = | 46586.3043 | EEL =     | -347302.0486 | HBOND =     | 0.0000    |
| 1-4 VDW = | 1412.3957  | 1-4 EEL = | 18778.7959   | RESTRAINT = | 0.0000    |

| NSTEP | ENERGY      | RMS        | GMAX       | NAME | NUMBER |
|-------|-------------|------------|------------|------|--------|
| 1500  | -2.5540E+05 | 2.7796E-01 | 3.6376E+01 | CD   | 3153   |

|           |            |           |              |             |           |
|-----------|------------|-----------|--------------|-------------|-----------|
| BOND =    | 19286.8217 | ANGLE =   | 1016.5958    | DIHED =     | 4976.5127 |
| VDWAALS = | 46671.3788 | EEL =     | -347535.2549 | HBOND =     | 0.0000    |
| 1-4 VDW = | 1410.8885  | 1-4 EEL = | 18776.9996   | RESTRAINT = | 0.0000    |

| NSTEP | ENERGY      | RMS        | GMAX       | NAME | NUMBER |
|-------|-------------|------------|------------|------|--------|
| 1600  | -2.5553E+05 | 1.5224E-01 | 1.7244E+01 | CA   | 3697   |

|           |            |           |              |             |           |
|-----------|------------|-----------|--------------|-------------|-----------|
| BOND =    | 19306.3614 | ANGLE =   | 1014.7036    | DIHED =     | 4973.6169 |
| VDWAALS = | 46752.1717 | EEL =     | -347757.3156 | HBOND =     | 0.0000    |
| 1-4 VDW = | 1409.4291  | 1-4 EEL = | 18775.7831   | RESTRAINT = | 0.0000    |

| NSTEP | ENERGY      | RMS        | GMAX       | NAME | NUMBER |
|-------|-------------|------------|------------|------|--------|
| 1700  | -2.5565E+05 | 9.9662E-02 | 6.1878E+00 | C    | 3707   |

|           |            |           |              |             |           |
|-----------|------------|-----------|--------------|-------------|-----------|
| BOND =    | 19324.9297 | ANGLE =   | 1013.5467    | DIHED =     | 4972.4166 |
| VDWAALS = | 46827.9712 | EEL =     | -347968.0408 | HBOND =     | 0.0000    |
| 1-4 VDW = | 1408.3049  | 1-4 EEL = | 18774.2395   | RESTRAINT = | 0.0000    |

| NSTEP | ENERGY      | RMS        | GMAX       | NAME | NUMBER |
|-------|-------------|------------|------------|------|--------|
| 1800  | -2.5577E+05 | 1.1762E-01 | 1.1245E+01 | C    | 3707   |

|           |            |           |              |             |           |
|-----------|------------|-----------|--------------|-------------|-----------|
| BOND =    | 19344.7276 | ANGLE =   | 1012.5963    | DIHED =     | 4971.7632 |
| VDWAALS = | 46903.5360 | EEL =     | -348179.3329 | HBOND =     | 0.0000    |
| 1-4 VDW = | 1407.3290  | 1-4 EEL = | 18773.0393   | RESTRAINT = | 0.0000    |

| NSTEP | ENERGY      | RMS        | GMAX       | NAME | NUMBER |
|-------|-------------|------------|------------|------|--------|
| 1900  | -2.5587E+05 | 3.9047E-01 | 9.1599E+01 | CD   | 3153   |

|           |            |           |              |             |           |
|-----------|------------|-----------|--------------|-------------|-----------|
| BOND =    | 19367.4021 | ANGLE =   | 1011.8896    | DIHED =     | 4970.7499 |
| VDWAALS = | 46976.9559 | EEL =     | -348379.6915 | HBOND =     | 0.0000    |
| 1-4 VDW = | 1406.5087  | 1-4 EEL = | 18771.9684   | RESTRAINT = | 0.0000    |

Supplementary Text 3

| NSTEP     | ENERGY      | RMS        | GMAX         | NAME        | NUMBER    |
|-----------|-------------|------------|--------------|-------------|-----------|
| 2000      | -2.5598E+05 | 2.8806E-01 | 4.1529E+01   | CD          | 3153      |
| BOND =    | 19383.8279  | ANGLE =    | 1011.3198    | DIHED =     | 4969.4916 |
| VDWAALS = | 47050.7344  | EEL =      | -348574.9661 | HBOND =     | 0.0000    |
| 1-4 VDW = | 1405.7827   | 1-4 EEL =  | 18770.7187   | RESTRAINT = | 0.0000    |

| NSTEP     | ENERGY      | RMS        | GMAX         | NAME        | NUMBER    |
|-----------|-------------|------------|--------------|-------------|-----------|
| 2100      | -2.5609E+05 | 2.5927E-01 | 3.8279E+01   | CD          | 3153      |
| BOND =    | 19402.7588  | ANGLE =    | 1010.5311    | DIHED =     | 4967.2599 |
| VDWAALS = | 47123.3933  | EEL =      | -348768.7741 | HBOND =     | 0.0000    |
| 1-4 VDW = | 1405.0345   | 1-4 EEL =  | 18770.3972   | RESTRAINT = | 0.0000    |

| NSTEP     | ENERGY      | RMS        | GMAX         | NAME        | NUMBER    |
|-----------|-------------|------------|--------------|-------------|-----------|
| 2200      | -2.5619E+05 | 2.0463E-01 | 1.9622E+01   | CE1         | 3736      |
| BOND =    | 19419.6568  | ANGLE =    | 1009.5154    | DIHED =     | 4964.6032 |
| VDWAALS = | 47194.1160  | EEL =      | -348954.8121 | HBOND =     | 0.0000    |
| 1-4 VDW = | 1404.4610   | 1-4 EEL =  | 18769.9712   | RESTRAINT = | 0.0000    |

| NSTEP     | ENERGY      | RMS        | GMAX         | NAME        | NUMBER    |
|-----------|-------------|------------|--------------|-------------|-----------|
| 2300      | -2.5629E+05 | 1.2962E-01 | 1.3693E+01   | CE1         | 3736      |
| BOND =    | 19437.0025  | ANGLE =    | 1008.2553    | DIHED =     | 4963.0635 |
| VDWAALS = | 47263.4346  | EEL =      | -349137.2948 | HBOND =     | 0.0000    |
| 1-4 VDW = | 1403.9515   | 1-4 EEL =  | 18770.3257   | RESTRAINT = | 0.0000    |

| NSTEP     | ENERGY      | RMS        | GMAX         | NAME        | NUMBER    |
|-----------|-------------|------------|--------------|-------------|-----------|
| 2400      | -2.5639E+05 | 8.7337E-02 | 5.1149E+00   | CE1         | 3736      |
| BOND =    | 19453.9932  | ANGLE =    | 1007.3400    | DIHED =     | 4961.9996 |
| VDWAALS = | 47332.4261  | EEL =      | -349316.3724 | HBOND =     | 0.0000    |
| 1-4 VDW = | 1403.4338   | 1-4 EEL =  | 18770.3249   | RESTRAINT = | 0.0000    |

| NSTEP     | ENERGY      | RMS        | GMAX         | NAME        | NUMBER    |
|-----------|-------------|------------|--------------|-------------|-----------|
| 2500      | -2.5648E+05 | 9.8944E-02 | 8.6679E+00   | CE1         | 3736      |
| BOND =    | 19470.8559  | ANGLE =    | 1006.4447    | DIHED =     | 4959.9416 |
| VDWAALS = | 47398.2040  | EEL =      | -349489.6870 | HBOND =     | 0.0000    |
| 1-4 VDW = | 1403.0594   | 1-4 EEL =  | 18770.0532   | RESTRAINT = | 0.0000    |

| NSTEP  | ENERGY      | RMS        | GMAX       | NAME    | NUMBER    |
|--------|-------------|------------|------------|---------|-----------|
| 2600   | -2.5657E+05 | 8.3405E-02 | 4.7471E+00 | CE1     | 3736      |
| BOND = | 19486.9804  | ANGLE =    | 1005.7509  | DIHED = | 4958.1882 |

Supplementary Text 3

VDWAALS = 47462.1862 EEL = -349658.1287 HBOND = 0.0000  
 1-4 VDW = 1402.5573 1-4 EEL = 18770.7885 RESTRAINT = 0.0000

NSTEP ENERGY RMS GMAX NAME NUMBER  
 2700 -2.5666E+05 2.4412E-01 3.9325E+01 CD 3153

BOND = 19504.8897 ANGLE = 1005.3800 DIHED = 4957.1746  
 VDWAALS = 47527.9992 EEL = -349828.5323 HBOND = 0.0000  
 1-4 VDW = 1402.1534 1-4 EEL = 18771.5747 RESTRAINT = 0.0000

NSTEP ENERGY RMS GMAX NAME NUMBER  
 2800 -2.5675E+05 1.4581E-01 1.6354E+01 CD 1360

BOND = 19520.6758 ANGLE = 1004.6567 DIHED = 4956.2857  
 VDWAALS = 47593.9899 EEL = -349999.0338 HBOND = 0.0000  
 1-4 VDW = 1401.7628 1-4 EEL = 18772.4518 RESTRAINT = 0.0000

NSTEP ENERGY RMS GMAX NAME NUMBER  
 2900 -2.5683E+05 1.2988E-01 1.4694E+01 CE1 3736

BOND = 19536.4943 ANGLE = 1004.2739 DIHED = 4955.2191  
 VDWAALS = 47655.9546 EEL = -350160.1285 HBOND = 0.0000  
 1-4 VDW = 1401.4328 1-4 EEL = 18773.3257 RESTRAINT = 0.0000

NSTEP ENERGY RMS GMAX NAME NUMBER  
 3000 -2.5691E+05 1.3161E-01 1.5703E+01 CE1 3736

BOND = 19552.5116 ANGLE = 1003.8994 DIHED = 4954.4691  
 VDWAALS = 47719.7273 EEL = -350318.5405 HBOND = 0.0000  
 1-4 VDW = 1401.1979 1-4 EEL = 18773.7737 RESTRAINT = 0.0000

NSTEP ENERGY RMS GMAX NAME NUMBER  
 3100 -2.5699E+05 7.3400E-02 3.1449E+00 CE1 3736

BOND = 19567.5627 ANGLE = 1003.5576 DIHED = 4953.9054  
 VDWAALS = 47783.6941 EEL = -350472.4012 HBOND = 0.0000  
 1-4 VDW = 1400.9552 1-4 EEL = 18773.5300 RESTRAINT = 0.0000

NSTEP ENERGY RMS GMAX NAME NUMBER  
 3200 -2.5706E+05 2.7807E-01 4.7568E+01 CD 1360

BOND = 19584.9666 ANGLE = 1003.5340 DIHED = 4953.4875  
 VDWAALS = 47847.5830 EEL = -350625.8682 HBOND = 0.0000  
 1-4 VDW = 1400.7372 1-4 EEL = 18773.0712 RESTRAINT = 0.0000

NSTEP ENERGY RMS GMAX NAME NUMBER  
 3300 -2.5714E+05 2.3348E-01 4.5663E+01 CD 1360

Supplementary Text 3

|         |   |            |         |   |              |           |   |           |
|---------|---|------------|---------|---|--------------|-----------|---|-----------|
| BOND    | = | 19598.8921 | ANGLE   | = | 1003.2048    | DIHED     | = | 4953.2211 |
| VDWAALS | = | 47908.1524 | EEL     | = | -350771.9947 | HBOND     | = | 0.0000    |
| 1-4 VDW | = | 1400.5471  | 1-4 EEL | = | 18772.6409   | RESTRAINT | = | 0.0000    |

|       |             |            |            |      |        |
|-------|-------------|------------|------------|------|--------|
| NSTEP | ENERGY      | RMS        | GMAX       | NAME | NUMBER |
| 3400  | -2.5721E+05 | 2.0717E-01 | 3.0334E+01 | CD   | 1360   |

|         |   |            |         |   |              |           |   |           |
|---------|---|------------|---------|---|--------------|-----------|---|-----------|
| BOND    | = | 19612.3822 | ANGLE   | = | 1002.7484    | DIHED     | = | 4953.0651 |
| VDWAALS | = | 47967.9718 | EEL     | = | -350915.6156 | HBOND     | = | 0.0000    |
| 1-4 VDW | = | 1400.3012  | 1-4 EEL | = | 18772.1066   | RESTRAINT | = | 0.0000    |

|       |             |            |            |      |        |
|-------|-------------|------------|------------|------|--------|
| NSTEP | ENERGY      | RMS        | GMAX       | NAME | NUMBER |
| 3500  | -2.5728E+05 | 1.6313E-01 | 1.9731E+01 | CE1  | 3736   |

|         |   |            |         |   |              |           |   |           |
|---------|---|------------|---------|---|--------------|-----------|---|-----------|
| BOND    | = | 19626.5341 | ANGLE   | = | 1002.4136    | DIHED     | = | 4952.9153 |
| VDWAALS | = | 48028.2555 | EEL     | = | -351058.2297 | HBOND     | = | 0.0000    |
| 1-4 VDW | = | 1400.0877  | 1-4 EEL | = | 18771.6304   | RESTRAINT | = | 0.0000    |

|       |             |            |            |      |        |
|-------|-------------|------------|------------|------|--------|
| NSTEP | ENERGY      | RMS        | GMAX       | NAME | NUMBER |
| 3600  | -2.5734E+05 | 9.9984E-02 | 1.0084E+01 | CE1  | 3736   |

|         |   |            |         |   |              |           |   |           |
|---------|---|------------|---------|---|--------------|-----------|---|-----------|
| BOND    | = | 19639.7743 | ANGLE   | = | 1001.9611    | DIHED     | = | 4952.6233 |
| VDWAALS | = | 48088.0464 | EEL     | = | -351195.8917 | HBOND     | = | 0.0000    |
| 1-4 VDW | = | 1399.8750  | 1-4 EEL | = | 18771.3380   | RESTRAINT | = | 0.0000    |

|       |             |            |            |      |        |
|-------|-------------|------------|------------|------|--------|
| NSTEP | ENERGY      | RMS        | GMAX       | NAME | NUMBER |
| 3700  | -2.5741E+05 | 6.7959E-02 | 2.9889E+00 | CE1  | 3736   |

|         |   |            |         |   |              |           |   |           |
|---------|---|------------|---------|---|--------------|-----------|---|-----------|
| BOND    | = | 19652.9327 | ANGLE   | = | 1001.6696    | DIHED     | = | 4952.2857 |
| VDWAALS | = | 48145.3015 | EEL     | = | -351329.5753 | HBOND     | = | 0.0000    |
| 1-4 VDW | = | 1399.6939  | 1-4 EEL | = | 18771.3666   | RESTRAINT | = | 0.0000    |

|       |             |            |            |      |        |
|-------|-------------|------------|------------|------|--------|
| NSTEP | ENERGY      | RMS        | GMAX       | NAME | NUMBER |
| 3800  | -2.5747E+05 | 2.8797E-01 | 6.5180E+01 | CD   | 1360   |

|         |   |            |         |   |              |           |   |           |
|---------|---|------------|---------|---|--------------|-----------|---|-----------|
| BOND    | = | 19668.0652 | ANGLE   | = | 1001.7359    | DIHED     | = | 4952.0943 |
| VDWAALS | = | 48199.8708 | EEL     | = | -351460.1990 | HBOND     | = | 0.0000    |
| 1-4 VDW | = | 1399.5403  | 1-4 EEL | = | 18771.6102   | RESTRAINT | = | 0.0000    |

|       |             |            |            |      |        |
|-------|-------------|------------|------------|------|--------|
| NSTEP | ENERGY      | RMS        | GMAX       | NAME | NUMBER |
| 3900  | -2.5753E+05 | 6.9890E-02 | 3.7067E+00 | CE1  | 3736   |

|         |   |            |         |   |              |           |   |           |
|---------|---|------------|---------|---|--------------|-----------|---|-----------|
| BOND    | = | 19678.3132 | ANGLE   | = | 1001.2382    | DIHED     | = | 4952.1442 |
| VDWAALS | = | 48254.4272 | EEL     | = | -351590.8492 | HBOND     | = | 0.0000    |
| 1-4 VDW | = | 1399.3669  | 1-4 EEL | = | 18772.1790   | RESTRAINT | = | 0.0000    |

## Supplementary Text 3

| NSTEP     | ENERGY      | RMS        | GMAX         | NAME        | NUMBER    |
|-----------|-------------|------------|--------------|-------------|-----------|
| 4000      | -2.5760E+05 | 1.7862E-01 | 2.0855E+01   | CE1         | 3736      |
| BOND =    | 19691.7732  | ANGLE =    | 1001.1391    | DIHED =     | 4952.1422 |
| VDWAALS = | 48310.0288  | EEL =      | -351722.8566 | HBOND =     | 0.0000    |
| 1-4 VDW = | 1399.1573   | 1-4 EEL =  | 18772.9077   | RESTRAINT = | 0.0000    |

| NSTEP     | ENERGY      | RMS        | GMAX         | NAME        | NUMBER    |
|-----------|-------------|------------|--------------|-------------|-----------|
| 4100      | -2.5766E+05 | 1.6401E-01 | 2.4464E+01   | CD          | 1360      |
| BOND =    | 19703.8431  | ANGLE =    | 1000.8625    | DIHED =     | 4951.9531 |
| VDWAALS = | 48363.6775  | EEL =      | -351848.6962 | HBOND =     | 0.0000    |
| 1-4 VDW = | 1398.9136   | 1-4 EEL =  | 18773.3828   | RESTRAINT = | 0.0000    |

| NSTEP     | ENERGY      | RMS        | GMAX         | NAME        | NUMBER    |
|-----------|-------------|------------|--------------|-------------|-----------|
| 4200      | -2.5772E+05 | 1.3145E-01 | 1.4750E+01   | CE1         | 3736      |
| BOND =    | 19715.5384  | ANGLE =    | 1000.6629    | DIHED =     | 4951.7359 |
| VDWAALS = | 48416.7486  | EEL =      | -351972.3506 | HBOND =     | 0.0000    |
| 1-4 VDW = | 1398.6927   | 1-4 EEL =  | 18773.8971   | RESTRAINT = | 0.0000    |

| NSTEP     | ENERGY      | RMS        | GMAX         | NAME        | NUMBER    |
|-----------|-------------|------------|--------------|-------------|-----------|
| 4300      | -2.5777E+05 | 6.7613E-02 | 3.9060E+00   | CE1         | 3736      |
| BOND =    | 19726.7826  | ANGLE =    | 1000.4054    | DIHED =     | 4951.5450 |
| VDWAALS = | 48467.8076  | EEL =      | -352090.8392 | HBOND =     | 0.0000    |
| 1-4 VDW = | 1398.4779   | 1-4 EEL =  | 18774.2564   | RESTRAINT = | 0.0000    |

| NSTEP     | ENERGY      | RMS        | GMAX         | NAME        | NUMBER    |
|-----------|-------------|------------|--------------|-------------|-----------|
| 4400      | -2.5783E+05 | 2.3647E-01 | 2.9786E+01   | CE1         | 3736      |
| BOND =    | 19739.9542  | ANGLE =    | 1000.3457    | DIHED =     | 4951.3716 |
| VDWAALS = | 48519.7107  | EEL =      | -352211.9185 | HBOND =     | 0.0000    |
| 1-4 VDW = | 1398.2677   | 1-4 EEL =  | 18774.5800   | RESTRAINT = | 0.0000    |

| NSTEP     | ENERGY      | RMS        | GMAX         | NAME        | NUMBER    |
|-----------|-------------|------------|--------------|-------------|-----------|
| 4500      | -2.5789E+05 | 6.5272E-02 | 3.1731E+00   | CE1         | 3736      |
| BOND =    | 19749.9589  | ANGLE =    | 999.9141     | DIHED =     | 4951.1892 |
| VDWAALS = | 48569.2097  | EEL =      | -352328.6791 | HBOND =     | 0.0000    |
| 1-4 VDW = | 1398.1150   | 1-4 EEL =  | 18774.9336   | RESTRAINT = | 0.0000    |

| NSTEP     | ENERGY      | RMS        | GMAX         | NAME        | NUMBER    |
|-----------|-------------|------------|--------------|-------------|-----------|
| 4600      | -2.5794E+05 | 1.8523E-01 | 2.2717E+01   | CE1         | 3736      |
| BOND =    | 19761.9385  | ANGLE =    | 999.6354     | DIHED =     | 4950.9861 |
| VDWAALS = | 48617.9748  | EEL =      | -352443.8519 | HBOND =     | 0.0000    |
| 1-4 VDW = | 1397.9960   | 1-4 EEL =  | 18775.2182   | RESTRAINT = | 0.0000    |

Supplementary Text 3

| NSTEP     | ENERGY      | RMS        | GMAX         | NAME        | NUMBER    |
|-----------|-------------|------------|--------------|-------------|-----------|
| 4700      | -2.5800E+05 | 8.4924E-02 | 7.7125E+00   | CE1         | 3736      |
| BOND =    | 19772.3444  | ANGLE =    | 999.1556     | DIHED =     | 4950.7728 |
| VDWAALS = | 48666.2314  | EEL =      | -352558.9612 | HBOND =     | 0.0000    |
| 1-4 VDW = | 1397.9158   | 1-4 EEL =  | 18775.5280   | RESTRAINT = | 0.0000    |

| NSTEP     | ENERGY      | RMS        | GMAX         | NAME        | NUMBER    |
|-----------|-------------|------------|--------------|-------------|-----------|
| 4800      | -2.5805E+05 | 1.2121E-01 | 1.2972E+01   | CE1         | 3736      |
| BOND =    | 19783.5534  | ANGLE =    | 998.6850     | DIHED =     | 4950.5749 |
| VDWAALS = | 48714.4218  | EEL =      | -352674.0511 | HBOND =     | 0.0000    |
| 1-4 VDW = | 1397.8214   | 1-4 EEL =  | 18775.6940   | RESTRAINT = | 0.0000    |

| NSTEP     | ENERGY      | RMS        | GMAX         | NAME        | NUMBER    |
|-----------|-------------|------------|--------------|-------------|-----------|
| 4900      | -2.5811E+05 | 2.6278E-01 | 3.0804E+01   | CE1         | 3736      |
| BOND =    | 19795.9177  | ANGLE =    | 998.4538     | DIHED =     | 4950.3923 |
| VDWAALS = | 48761.7961  | EEL =      | -352787.2207 | HBOND =     | 0.0000    |
| 1-4 VDW = | 1397.7154   | 1-4 EEL =  | 18775.7614   | RESTRAINT = | 0.0000    |

| NSTEP     | ENERGY      | RMS        | GMAX         | NAME        | NUMBER    |
|-----------|-------------|------------|--------------|-------------|-----------|
| 5000      | -2.5816E+05 | 7.1486E-02 | 4.6857E+00   | CE1         | 3736      |
| BOND =    | 19804.7813  | ANGLE =    | 997.8405     | DIHED =     | 4950.2105 |
| VDWAALS = | 48807.9069  | EEL =      | -352897.2595 | HBOND =     | 0.0000    |
| 1-4 VDW = | 1397.5974   | 1-4 EEL =  | 18775.8161   | RESTRAINT = | 0.0000    |

Maximum number of minimization cycles reached.

FINAL RESULTS

| NSTEP     | ENERGY      | RMS        | GMAX         | NAME        | NUMBER    |
|-----------|-------------|------------|--------------|-------------|-----------|
| 5000      | -2.5816E+05 | 7.1486E-02 | 4.6857E+00   | CE1         | 3736      |
| BOND =    | 19804.7813  | ANGLE =    | 997.8405     | DIHED =     | 4950.2105 |
| VDWAALS = | 48807.9069  | EEL =      | -352897.2595 | HBOND =     | 0.0000    |
| 1-4 VDW = | 1397.5974   | 1-4 EEL =  | 18775.8161   | RESTRAINT = | 0.0000    |

-----  
5. TIMINGS  
-----

|  |                |                         |
|--|----------------|-------------------------|
|  | Build the list | 18.37 (91.58% of List ) |
|  | Other          | 1.69 ( 8.42% of List )  |

Supplementary Text 3

```

|      List time                20.05 ( 0.29% of Nonbo)
|      Short_ene time           6236.74 (99.68% of Direc)
|      Other                     19.96 ( 0.32% of Direc)
|      Direct Ewald time         6256.70 (91.62% of Ewald)
|      Adjust Ewald time         25.77 ( 0.38% of Ewald)
|      Fill Bspline coeffs       18.76 ( 3.47% of Recip)
|      Fill charge grid          75.46 (13.95% of Recip)
|      Scalar sum                103.82 (19.19% of Recip)
|      Grad sum                  129.38 (23.91% of Recip)
|      FFT time                  213.62 (39.48% of Recip)
|      Recip Ewald time          541.06 ( 7.92% of Ewald)
|      Virial junk                1.42 ( 0.02% of Ewald)
|      Other                     4.37 ( 0.06% of Ewald)
|      Ewald time                6829.33 (99.71% of Nonbo)
|      Nonbond force             6849.39 (99.41% of Force)
|      Bond/Angle/Dihedral       40.05 ( 0.58% of Force)
|      Other                     0.66 ( 0.01% of Force)
|      Force time                6890.10 (100.0% of Runmd)
|      Runmd Time                6890.10 (99.72% of Total)
|      Other                     19.65 ( 0.28% of Total)
| Total time                    6909.77 (100.0% of ALL )

```

| Number of list builds : 18

```

| Highest rstack allocated: 3470642
| Highest irstack allocated: 65080
|   Job began at 17:36:44.410 on 02/21/2019
|   Setup done at 17:36:44.947 on 02/21/2019
|   Run done at 19:31:54.181 on 02/21/2019
| wallclock() was called 190084 times

```

-----  
Amber 16 SANDER 2016  
-----

| Run on 02/20/2019 at 17:17:31

```

| Executable path: /usr/local/amber16/bin/sander
| Working directory: /Users/Swati
| Hostname: Unknown
| [-O]verwriting output

```

File Assignments:

```

| MDIN: /Users/Swati/minimization_file_2.in
| MDOUT: /Users/Swati/ZSP9_files_2/truncated_ZSP9_min3_2.out
| INPCRD: /Users/Swati/ZSP9_files_2/truncated_ZSP9_min3_1.rst
| PARM: /Users/Swati/ZSP9_files_2/ZSP9.prmtop
| RESTRT: /Users/Swati/ZSP9_files_2/truncated_ZSP9_min3_2.rst
| REFC: refc
| MDVEL: mdvel
| MDFRC: mdfrc
| MDEN: mden
| MDCRD: mdcrd
| MDINFO: mdinfo

```

Supplementary Text 3

```
| MTMD: mtmd
| INPDIP: inpdip
| RSTDIP: rstdip
| INPTRA: inptraj
```

Here is the input file:

```
PROT: minimization_2
&cntrl
imin = 1,
maxcyc = 5000,
ncyc = 10000,
igb = 0,
ntpr = 100,
ntp = 0
cut = 12
&end
```

-----  
1. RESOURCE USE:  
-----

```
| Flags:
| getting box info from netcdf restart file
| NetCDF restart box info found
| Largest sphere to fit in unit cell has radius = 43.290
| New format PARM file being parsed.
| Version = 1.000 Date = 08/10/17 Time = 02:13:56
| NATOM = 92322 NTYPES = 17 NBONH = 88587 MBONA = 3843
| NTHETH = 8001 MTHETA = 5230 NPHIH = 16775 MPHIA = 16079
| NHPARM = 0 NPARM = 0 NNB = 153390 NRES = 28827
| NBONA = 3843 NTHETA = 5230 NPHIA = 16079 NUMBND = 67
| NUMANG = 152 NPTRA = 191 NATYP = 36 NPHB = 1
| IFBOX = 1 NMXRS = 24 IFCAP = 0 NEXTRA = 0
| NCOPY = 0
```

```
| Memory Use Allocated
| Real 7288505
| Hollerith 305795
| Integer 3691274
| Max Pairs 84443856
| nblastReal 1107864
| nblast Int 3033137
| Total 422917 kbytes
```

| Note: 1-4 EEL scale factors are being read from the topology file.

```
| Note: 1-4 VDW scale factors are being read from the topology file.
| Duplicated 0 dihedrals
| Duplicated 0 dihedrals
```



### Supplementary Text 3

BOX TYPE: RECTILINEAR

---

#### 2. CONTROL DATA FOR THE RUN

---

default\_name

General flags:

imin = 1, nmropt = 0

Nature and format of input:

ntx = 1, irest = 0, ntrx = 1

Nature and format of output:

ntxo = 2, ntp = 100, ntr = 1, ntw = 1  
iwrap = 0, ntwx = 0, ntwv = 0, ntwe = 0  
ioutfm = 1, ntwprt = 0, idecomp = 0, rbornstat = 0

Potential function:

ntf = 1, ntb = 1, igb = 0, nsnb = 25  
ipol = 0, gbsa = 0, iesp = 0  
dielc = 1.00000, cut = 12.00000, intdiel = 1.00000

Frozen or restrained atoms:

ibelly = 0, ntr = 0

Energy minimization:

maxcyc = 5000, ncyc = 10000, ntmin = 1  
dx0 = 0.01000, drms = 0.00010

Ewald parameters:

verbose = 0, ew\_type = 0, nbflag = 1, use\_pme = 1  
vdwmeth = 1, eedmeth = 1, netfr = 0  
Box X = 118.606 Box Y = 86.581 Box Z = 106.952  
Alpha = 90.000 Beta = 90.000 Gamma = 90.000  
NFFT1 = 120 NFFT2 = 90 NFFT3 = 108  
Cutoff = 12.000 Tol = 0.100E-04  
Ewald Coefficient = 0.22664  
Interpolation order = 4

| INFO: Old style inpcrd file read

---

#### 3. ATOMIC COORDINATES AND VELOCITIES

---

default\_name

begin time read from input coords = 0.000 ps

Number of triangulated 3-point waters found: 28349

Sum of charges from parm topology file = -0.00000026

Forcing neutrality...

Supplementary Text 3

4. RESULTS

-----  
 APPROXIMATING switch and d/dx switch using CUBIC SPLINE INTERPOLATION  
 using 5000.0 points per unit in tabled values  
 TESTING RELATIVE ERROR over r ranging from 0.0 to cutoff  
 | CHECK switch(x): max rel err = 0.2738E-14 at 2.422500  
 | CHECK d/dx switch(x): max rel err = 0.7967E-11 at 2.716640  
 -----

| Local SIZE OF NONBOND LIST = 45680654  
 | TOTAL SIZE OF NONBOND LIST = 45680654

| NSTEP     | ENERGY      | RMS        | GMAX         | NAME        | NUMBER    |
|-----------|-------------|------------|--------------|-------------|-----------|
| 1         | -3.4663E+05 | 4.4204E+00 | 7.3532E+02   | C           | 3786      |
| BOND =    | 37478.5623  | ANGLE =    | 2727.8166    | DIHED =     | 5547.3663 |
| VDWAALS = | 69428.2816  | EEL =      | -483213.4724 | HBOND =     | 0.0000    |
| 1-4 VDW = | 2150.0887   | 1-4 EEL =  | 19251.9883   | RESTRAINT = | 0.0000    |

| NSTEP     | ENERGY      | RMS        | GMAX         | NAME        | NUMBER    |
|-----------|-------------|------------|--------------|-------------|-----------|
| 100       | -3.6114E+05 | 7.0015E-01 | 1.3230E+02   | C           | 3800      |
| BOND =    | 28167.2649  | ANGLE =    | 1601.1037    | DIHED =     | 5565.4396 |
| VDWAALS = | 67040.0381  | EEL =      | -483880.1840 | HBOND =     | 0.0000    |
| 1-4 VDW = | 1705.8561   | 1-4 EEL =  | 18658.3330   | RESTRAINT = | 0.0000    |

| NSTEP     | ENERGY      | RMS        | GMAX         | NAME        | NUMBER    |
|-----------|-------------|------------|--------------|-------------|-----------|
| 200       | -3.6261E+05 | 7.4260E-01 | 9.7903E+01   | C           | 3800      |
| BOND =    | 27790.1455  | ANGLE =    | 1359.9399    | DIHED =     | 5530.1852 |
| VDWAALS = | 67051.7976  | EEL =      | -484551.8178 | HBOND =     | 0.0000    |
| 1-4 VDW = | 1613.4361   | 1-4 EEL =  | 18600.9306   | RESTRAINT = | 0.0000    |

| NSTEP     | ENERGY      | RMS        | GMAX         | NAME        | NUMBER    |
|-----------|-------------|------------|--------------|-------------|-----------|
| 300       | -3.6334E+05 | 1.8066E-01 | 1.4320E+01   | C           | 3800      |
| BOND =    | 27685.3367  | ANGLE =    | 1275.8406    | DIHED =     | 5507.8262 |
| VDWAALS = | 67168.2024  | EEL =      | -485147.3485 | HBOND =     | 0.0000    |
| 1-4 VDW = | 1582.0614   | 1-4 EEL =  | 18592.2689   | RESTRAINT = | 0.0000    |

| NSTEP     | ENERGY      | RMS        | GMAX         | NAME        | NUMBER    |
|-----------|-------------|------------|--------------|-------------|-----------|
| 400       | -3.6383E+05 | 1.5222E-01 | 1.1507E+01   | N           | 3802      |
| BOND =    | 27674.7094  | ANGLE =    | 1227.5164    | DIHED =     | 5492.1901 |
| VDWAALS = | 67309.2572  | EEL =      | -485690.7491 | HBOND =     | 0.0000    |
| 1-4 VDW = | 1565.2225   | 1-4 EEL =  | 18595.3366   | RESTRAINT = | 0.0000    |

Supplementary Text 3

| NSTEP     | ENERGY      | RMS        | GMAX         | NAME        | NUMBER    |
|-----------|-------------|------------|--------------|-------------|-----------|
| 500       | -3.6421E+05 | 3.9962E-01 | 6.3379E+01   | CD          | 3248      |
| BOND =    | 27696.1168  | ANGLE =    | 1182.9635    | DIHED =     | 5486.9177 |
| VDWAALS = | 67459.1429  | EEL =      | -486192.2990 | HBOND =     | 0.0000    |
| 1-4 VDW = | 1554.0706   | 1-4 EEL =  | 18599.8108   | RESTRAINT = | 0.0000    |

| NSTEP     | ENERGY      | RMS        | GMAX         | NAME        | NUMBER    |
|-----------|-------------|------------|--------------|-------------|-----------|
| 600       | -3.6458E+05 | 4.0079E-01 | 8.8124E+01   | CD          | 3248      |
| BOND =    | 27722.9446  | ANGLE =    | 1124.0107    | DIHED =     | 5482.9957 |
| VDWAALS = | 67615.6574  | EEL =      | -486669.9080 | HBOND =     | 0.0000    |
| 1-4 VDW = | 1541.0633   | 1-4 EEL =  | 18606.7278   | RESTRAINT = | 0.0000    |

| NSTEP     | ENERGY      | RMS        | GMAX         | NAME        | NUMBER    |
|-----------|-------------|------------|--------------|-------------|-----------|
| 700       | -3.6488E+05 | 2.9902E-01 | 4.8884E+01   | C           | 3800      |
| BOND =    | 27747.6299  | ANGLE =    | 1104.1064    | DIHED =     | 5477.3560 |
| VDWAALS = | 67769.6794  | EEL =      | -487120.3763 | HBOND =     | 0.0000    |
| 1-4 VDW = | 1535.2137   | 1-4 EEL =  | 18611.2458   | RESTRAINT = | 0.0000    |

| NSTEP     | ENERGY      | RMS        | GMAX         | NAME        | NUMBER    |
|-----------|-------------|------------|--------------|-------------|-----------|
| 800       | -3.6514E+05 | 1.9460E-01 | 3.2227E+01   | C           | 3800      |
| BOND =    | 27773.3351  | ANGLE =    | 1094.2684    | DIHED =     | 5471.4371 |
| VDWAALS = | 67921.0933  | EEL =      | -487545.6466 | HBOND =     | 0.0000    |
| 1-4 VDW = | 1531.3028   | 1-4 EEL =  | 18613.1607   | RESTRAINT = | 0.0000    |

| NSTEP     | ENERGY      | RMS        | GMAX         | NAME        | NUMBER    |
|-----------|-------------|------------|--------------|-------------|-----------|
| 900       | -3.6539E+05 | 1.1548E-01 | 8.6733E+00   | C           | 3800      |
| BOND =    | 27805.0273  | ANGLE =    | 1084.4201    | DIHED =     | 5466.8761 |
| VDWAALS = | 68073.5225  | EEL =      | -487959.4723 | HBOND =     | 0.0000    |
| 1-4 VDW = | 1527.8796   | 1-4 EEL =  | 18614.1880   | RESTRAINT = | 0.0000    |

| NSTEP     | ENERGY      | RMS        | GMAX         | NAME        | NUMBER    |
|-----------|-------------|------------|--------------|-------------|-----------|
| 1000      | -3.6561E+05 | 1.1159E-01 | 9.6165E+00   | C           | 3800      |
| BOND =    | 27835.8712  | ANGLE =    | 1078.2597    | DIHED =     | 5464.7244 |
| VDWAALS = | 68221.5710  | EEL =      | -488351.6049 | HBOND =     | 0.0000    |
| 1-4 VDW = | 1525.0294   | 1-4 EEL =  | 18615.0592   | RESTRAINT = | 0.0000    |

| NSTEP  | ENERGY      | RMS        | GMAX       | NAME    | NUMBER    |
|--------|-------------|------------|------------|---------|-----------|
| 1100   | -3.6582E+05 | 1.2129E-01 | 1.1991E+01 | C       | 3800      |
| BOND = | 27867.1875  | ANGLE =    | 1072.0871  | DIHED = | 5462.3794 |

Supplementary Text 3

VDWAALS = 68362.3188 EEL = -488720.9874 HBOND = 0.0000  
 1-4 VDW = 1522.4596 1-4 EEL = 18615.8866 RESTRAINT = 0.0000

NSTEP ENERGY RMS GMAX NAME NUMBER  
 1200 -3.6601E+05 1.0463E-01 8.0162E+00 C 3800

BOND = 27895.9711 ANGLE = 1067.5870 DIHED = 5459.0860  
 VDWAALS = 68494.3449 EEL = -489067.2985 HBOND = 0.0000  
 1-4 VDW = 1520.2909 1-4 EEL = 18617.1296 RESTRAINT = 0.0000

NSTEP ENERGY RMS GMAX NAME NUMBER  
 1300 -3.6620E+05 2.7121E-01 4.1542E+01 C 3786

BOND = 27926.4790 ANGLE = 1064.5321 DIHED = 5456.1348  
 VDWAALS = 68620.4396 EEL = -489400.6047 HBOND = 0.0000  
 1-4 VDW = 1518.5528 1-4 EEL = 18618.4072 RESTRAINT = 0.0000

NSTEP ENERGY RMS GMAX NAME NUMBER  
 1400 -3.6638E+05 2.7349E-01 5.5638E+01 CD 3248

BOND = 27957.4091 ANGLE = 1058.2656 DIHED = 5454.1160  
 VDWAALS = 68741.3593 EEL = -489721.9453 HBOND = 0.0000  
 1-4 VDW = 1516.9460 1-4 EEL = 18618.8287 RESTRAINT = 0.0000

NSTEP ENERGY RMS GMAX NAME NUMBER  
 1500 -3.6655E+05 2.0681E-01 2.8565E+01 C 3786

BOND = 27983.4766 ANGLE = 1055.7493 DIHED = 5450.7975  
 VDWAALS = 68859.0686 EEL = -490033.8112 HBOND = 0.0000  
 1-4 VDW = 1515.5989 1-4 EEL = 18618.8380 RESTRAINT = 0.0000

NSTEP ENERGY RMS GMAX NAME NUMBER  
 1600 -3.6672E+05 1.5971E-01 2.0657E+01 C 3786

BOND = 28012.8247 ANGLE = 1050.9059 DIHED = 5448.9518  
 VDWAALS = 68974.4986 EEL = -490337.3630 HBOND = 0.0000  
 1-4 VDW = 1514.3189 1-4 EEL = 18618.2802 RESTRAINT = 0.0000

NSTEP ENERGY RMS GMAX NAME NUMBER  
 1700 -3.6688E+05 1.2484E-01 1.2174E+01 C 3786

BOND = 28039.7998 ANGLE = 1048.4214 DIHED = 5447.3351  
 VDWAALS = 69089.1193 EEL = -490633.8849 HBOND = 0.0000  
 1-4 VDW = 1513.1617 1-4 EEL = 18618.0611 RESTRAINT = 0.0000

NSTEP ENERGY RMS GMAX NAME NUMBER  
 1800 -3.6703E+05 3.6876E-01 9.4931E+01 CD 3248

Supplementary Text 3

|         |   |            |         |   |              |           |   |           |
|---------|---|------------|---------|---|--------------|-----------|---|-----------|
| BOND    | = | 28072.2979 | ANGLE   | = | 1045.9289    | DIHED     | = | 5446.5784 |
| VDWAALS | = | 69204.5488 | EEL     | = | -490927.5841 | HBOND     | = | 0.0000    |
| 1-4 VDW | = | 1512.0119  | 1-4 EEL | = | 18618.0587   | RESTRAINT | = | 0.0000    |

|       |             |            |            |      |        |
|-------|-------------|------------|------------|------|--------|
| NSTEP | ENERGY      | RMS        | GMAX       | NAME | NUMBER |
| 1900  | -3.6718E+05 | 2.7025E-01 | 4.1302E+01 | CD   | 3248   |

|         |   |            |         |   |              |           |   |           |
|---------|---|------------|---------|---|--------------|-----------|---|-----------|
| BOND    | = | 28098.7350 | ANGLE   | = | 1043.0701    | DIHED     | = | 5446.5324 |
| VDWAALS | = | 69321.2035 | EEL     | = | -491218.0143 | HBOND     | = | 0.0000    |
| 1-4 VDW | = | 1510.9964  | 1-4 EEL | = | 18618.3152   | RESTRAINT | = | 0.0000    |

|       |             |            |            |      |        |
|-------|-------------|------------|------------|------|--------|
| NSTEP | ENERGY      | RMS        | GMAX       | NAME | NUMBER |
| 2000  | -3.6733E+05 | 2.3184E-01 | 3.6436E+01 | CE1  | 4295   |

|         |   |            |         |   |              |           |   |           |
|---------|---|------------|---------|---|--------------|-----------|---|-----------|
| BOND    | = | 28125.6654 | ANGLE   | = | 1041.0862    | DIHED     | = | 5445.9318 |
| VDWAALS | = | 69437.8749 | EEL     | = | -491506.1993 | HBOND     | = | 0.0000    |
| 1-4 VDW | = | 1510.0575  | 1-4 EEL | = | 18618.2840   | RESTRAINT | = | 0.0000    |

|       |             |            |            |      |        |
|-------|-------------|------------|------------|------|--------|
| NSTEP | ENERGY      | RMS        | GMAX       | NAME | NUMBER |
| 2100  | -3.6747E+05 | 1.9943E-01 | 3.1100E+01 | CE1  | 4295   |

|         |   |            |         |   |              |           |   |           |
|---------|---|------------|---------|---|--------------|-----------|---|-----------|
| BOND    | = | 28152.6367 | ANGLE   | = | 1039.0362    | DIHED     | = | 5444.8202 |
| VDWAALS | = | 69551.4856 | EEL     | = | -491784.9647 | HBOND     | = | 0.0000    |
| 1-4 VDW | = | 1509.2391  | 1-4 EEL | = | 18618.6103   | RESTRAINT | = | 0.0000    |

|       |             |            |            |      |        |
|-------|-------------|------------|------------|------|--------|
| NSTEP | ENERGY      | RMS        | GMAX       | NAME | NUMBER |
| 2200  | -3.6761E+05 | 8.1550E-02 | 4.3438E+00 | CE1  | 4295   |

|         |   |            |         |   |              |           |   |           |
|---------|---|------------|---------|---|--------------|-----------|---|-----------|
| BOND    | = | 28178.0119 | ANGLE   | = | 1037.6783    | DIHED     | = | 5443.7066 |
| VDWAALS | = | 69663.8008 | EEL     | = | -492058.0224 | HBOND     | = | 0.0000    |
| 1-4 VDW | = | 1508.5560  | 1-4 EEL | = | 18619.3298   | RESTRAINT | = | 0.0000    |

|       |             |            |            |      |        |
|-------|-------------|------------|------------|------|--------|
| NSTEP | ENERGY      | RMS        | GMAX       | NAME | NUMBER |
| 2300  | -3.6774E+05 | 8.6683E-02 | 6.9881E+00 | CE1  | 4295   |

|         |   |            |         |   |              |           |   |           |
|---------|---|------------|---------|---|--------------|-----------|---|-----------|
| BOND    | = | 28203.9160 | ANGLE   | = | 1036.5201    | DIHED     | = | 5442.5775 |
| VDWAALS | = | 69772.4943 | EEL     | = | -492319.6287 | HBOND     | = | 0.0000    |
| 1-4 VDW | = | 1508.0854  | 1-4 EEL | = | 18620.1604   | RESTRAINT | = | 0.0000    |

|       |             |            |            |      |        |
|-------|-------------|------------|------------|------|--------|
| NSTEP | ENERGY      | RMS        | GMAX       | NAME | NUMBER |
| 2400  | -3.6786E+05 | 9.6730E-02 | 1.0718E+01 | CE1  | 4295   |

|         |   |            |         |   |              |           |   |           |
|---------|---|------------|---------|---|--------------|-----------|---|-----------|
| BOND    | = | 28229.0495 | ANGLE   | = | 1035.3760    | DIHED     | = | 5441.6269 |
| VDWAALS | = | 69879.1572 | EEL     | = | -492572.5971 | HBOND     | = | 0.0000    |
| 1-4 VDW | = | 1507.7375  | 1-4 EEL | = | 18621.1848   | RESTRAINT | = | 0.0000    |

## Supplementary Text 3

| NSTEP | ENERGY      | RMS        | GMAX       | NAME | NUMBER |
|-------|-------------|------------|------------|------|--------|
| 2500  | -3.6797E+05 | 2.6478E-01 | 4.2194E+01 | CE1  | 4295   |

|           |            |           |              |             |           |
|-----------|------------|-----------|--------------|-------------|-----------|
| BOND =    | 28255.9595 | ANGLE =   | 1034.3797    | DIHED =     | 5440.7486 |
| VDWAALS = | 69983.7137 | EEL =     | -492818.0215 | HBOND =     | 0.0000    |
| 1-4 VDW = | 1507.4789  | 1-4 EEL = | 18622.2806   | RESTRAINT = | 0.0000    |

| NSTEP | ENERGY      | RMS        | GMAX       | NAME | NUMBER |
|-------|-------------|------------|------------|------|--------|
| 2600  | -3.6809E+05 | 2.6669E-01 | 4.7175E+01 | CD   | 3248   |

|           |            |           |              |             |           |
|-----------|------------|-----------|--------------|-------------|-----------|
| BOND =    | 28279.2279 | ANGLE =   | 1033.4382    | DIHED =     | 5439.8894 |
| VDWAALS = | 70085.3300 | EEL =     | -493056.5576 | HBOND =     | 0.0000    |
| 1-4 VDW = | 1507.2935  | 1-4 EEL = | 18623.3776   | RESTRAINT = | 0.0000    |

| NSTEP | ENERGY      | RMS        | GMAX       | NAME | NUMBER |
|-------|-------------|------------|------------|------|--------|
| 2700  | -3.6820E+05 | 1.9430E-01 | 2.8482E+01 | CE1  | 4295   |

|           |            |           |              |             |           |
|-----------|------------|-----------|--------------|-------------|-----------|
| BOND =    | 28300.3820 | ANGLE =   | 1032.0697    | DIHED =     | 5439.0808 |
| VDWAALS = | 70180.1453 | EEL =     | -493281.5462 | HBOND =     | 0.0000    |
| 1-4 VDW = | 1507.0786  | 1-4 EEL = | 18624.3268   | RESTRAINT = | 0.0000    |

| NSTEP | ENERGY      | RMS        | GMAX       | NAME | NUMBER |
|-------|-------------|------------|------------|------|--------|
| 2800  | -3.6831E+05 | 1.2155E-01 | 1.5814E+01 | CE1  | 4295   |

|           |            |           |              |             |           |
|-----------|------------|-----------|--------------|-------------|-----------|
| BOND =    | 28321.5353 | ANGLE =   | 1031.1002    | DIHED =     | 5438.3562 |
| VDWAALS = | 70273.5559 | EEL =     | -493504.6618 | HBOND =     | 0.0000    |
| 1-4 VDW = | 1506.9063  | 1-4 EEL = | 18625.2379   | RESTRAINT = | 0.0000    |

| NSTEP | ENERGY      | RMS        | GMAX       | NAME | NUMBER |
|-------|-------------|------------|------------|------|--------|
| 2900  | -3.6841E+05 | 1.2971E-01 | 1.8693E+01 | CE1  | 4295   |

|           |            |           |              |             |           |
|-----------|------------|-----------|--------------|-------------|-----------|
| BOND =    | 28343.5533 | ANGLE =   | 1030.1451    | DIHED =     | 5437.7478 |
| VDWAALS = | 70364.3602 | EEL =     | -493722.7234 | HBOND =     | 0.0000    |
| 1-4 VDW = | 1506.7125  | 1-4 EEL = | 18626.0308   | RESTRAINT = | 0.0000    |

| NSTEP | ENERGY      | RMS        | GMAX       | NAME | NUMBER |
|-------|-------------|------------|------------|------|--------|
| 3000  | -3.6852E+05 | 7.2695E-02 | 4.1749E+00 | CE1  | 4295   |

|           |            |           |              |             |           |
|-----------|------------|-----------|--------------|-------------|-----------|
| BOND =    | 28363.9884 | ANGLE =   | 1029.3344    | DIHED =     | 5437.2615 |
| VDWAALS = | 70450.3790 | EEL =     | -493930.3167 | HBOND =     | 0.0000    |
| 1-4 VDW = | 1506.5222  | 1-4 EEL = | 18626.6680   | RESTRAINT = | 0.0000    |

| NSTEP | ENERGY      | RMS        | GMAX       | NAME | NUMBER |
|-------|-------------|------------|------------|------|--------|
| 3100  | -3.6861E+05 | 2.5753E-01 | 3.8613E+01 | CE1  | 4295   |

|           |            |           |              |             |           |
|-----------|------------|-----------|--------------|-------------|-----------|
| BOND =    | 28386.7906 | ANGLE =   | 1028.9284    | DIHED =     | 5436.8264 |
| VDWAALS = | 70533.5734 | EEL =     | -494130.9366 | HBOND =     | 0.0000    |
| 1-4 VDW = | 1506.3472  | 1-4 EEL = | 18627.1935   | RESTRAINT = | 0.0000    |

Supplementary Text 3

| NSTEP     | ENERGY      | RMS        | GMAX         | NAME        | NUMBER    |
|-----------|-------------|------------|--------------|-------------|-----------|
| 3200      | -3.6871E+05 | 2.2447E-01 | 3.2015E+01   | CD          | 3248      |
| BOND =    | 28406.3276  | ANGLE =    | 1028.1899    | DIHED =     | 5436.4316 |
| VDWAALS = | 70615.5617  | EEL =      | -494329.6855 | HBOND =     | 0.0000    |
| 1-4 VDW = | 1506.1184   | 1-4 EEL =  | 18627.6294   | RESTRAINT = | 0.0000    |

| NSTEP     | ENERGY      | RMS        | GMAX         | NAME        | NUMBER    |
|-----------|-------------|------------|--------------|-------------|-----------|
| 3300      | -3.6881E+05 | 1.9700E-01 | 2.9960E+01   | CE1         | 4295      |
| BOND =    | 28425.4591  | ANGLE =    | 1027.7356    | DIHED =     | 5436.1076 |
| VDWAALS = | 70694.5066  | EEL =      | -494523.2472 | HBOND =     | 0.0000    |
| 1-4 VDW = | 1505.8997   | 1-4 EEL =  | 18628.0232   | RESTRAINT = | 0.0000    |

| NSTEP     | ENERGY      | RMS        | GMAX         | NAME        | NUMBER    |
|-----------|-------------|------------|--------------|-------------|-----------|
| 3400      | -3.6890E+05 | 1.1264E-01 | 1.5029E+01   | CE1         | 4295      |
| BOND =    | 28443.6111  | ANGLE =    | 1027.0876    | DIHED =     | 5435.8257 |
| VDWAALS = | 70771.1237  | EEL =      | -494713.3948 | HBOND =     | 0.0000    |
| 1-4 VDW = | 1505.6911   | 1-4 EEL =  | 18628.3762   | RESTRAINT = | 0.0000    |

| NSTEP     | ENERGY      | RMS        | GMAX         | NAME        | NUMBER    |
|-----------|-------------|------------|--------------|-------------|-----------|
| 3500      | -3.6900E+05 | 6.8921E-02 | 3.2235E+00   | CE1         | 4295      |
| BOND =    | 28462.2049  | ANGLE =    | 1026.5364    | DIHED =     | 5435.4973 |
| VDWAALS = | 70845.4748  | EEL =      | -494901.3085 | HBOND =     | 0.0000    |
| 1-4 VDW = | 1505.5177   | 1-4 EEL =  | 18628.7444   | RESTRAINT = | 0.0000    |

| NSTEP     | ENERGY      | RMS        | GMAX         | NAME        | NUMBER    |
|-----------|-------------|------------|--------------|-------------|-----------|
| 3600      | -3.6909E+05 | 6.9897E-02 | 3.7045E+00   | CE1         | 4295      |
| BOND =    | 28481.0985  | ANGLE =    | 1026.0004    | DIHED =     | 5435.1262 |
| VDWAALS = | 70918.3720  | EEL =      | -495088.2440 | HBOND =     | 0.0000    |
| 1-4 VDW = | 1505.3579   | 1-4 EEL =  | 18629.1116   | RESTRAINT = | 0.0000    |

| NSTEP     | ENERGY      | RMS        | GMAX         | NAME        | NUMBER    |
|-----------|-------------|------------|--------------|-------------|-----------|
| 3700      | -3.6919E+05 | 2.4359E-01 | 3.8109E+01   | CE1         | 4295      |
| BOND =    | 28502.6700  | ANGLE =    | 1025.6823    | DIHED =     | 5434.7467 |
| VDWAALS = | 70992.5797  | EEL =      | -495278.0821 | HBOND =     | 0.0000    |
| 1-4 VDW = | 1505.2094   | 1-4 EEL =  | 18629.3990   | RESTRAINT = | 0.0000    |

| NSTEP  | ENERGY      | RMS        | GMAX       | NAME    | NUMBER    |
|--------|-------------|------------|------------|---------|-----------|
| 3800   | -3.6928E+05 | 1.9925E-01 | 3.1286E+01 | CE1     | 4295      |
| BOND = | 28520.6148  | ANGLE =    | 1025.2592  | DIHED = | 5434.3808 |

## Supplementary Text 3

VDWAALS = 71065.1410 EEL = -495460.7795 HBOND = 0.0000  
 1-4 VDW = 1505.0690 1-4 EEL = 18629.5592 RESTRAINT = 0.0000

NSTEP ENERGY RMS GMAX NAME NUMBER  
 3900 -3.6937E+05 1.9398E-01 2.8176E+01 CE1 4295

BOND = 28539.1807 ANGLE = 1024.8723 DIHED = 5434.0431  
 VDWAALS = 71137.9021 EEL = -495641.1939 HBOND = 0.0000  
 1-4 VDW = 1504.9204 1-4 EEL = 18629.6226 RESTRAINT = 0.0000

NSTEP ENERGY RMS GMAX NAME NUMBER  
 4000 -3.6946E+05 1.1106E-01 1.4786E+01 CE1 4295

BOND = 28556.2450 ANGLE = 1024.4932 DIHED = 5433.7193  
 VDWAALS = 71209.0657 EEL = -495816.1178 HBOND = 0.0000  
 1-4 VDW = 1504.7553 1-4 EEL = 18629.6141 RESTRAINT = 0.0000

NSTEP ENERGY RMS GMAX NAME NUMBER  
 4100 -3.6954E+05 8.9660E-02 9.7689E+00 CE1 4295

BOND = 28574.1840 ANGLE = 1024.1973 DIHED = 5433.4208  
 VDWAALS = 71281.4450 EEL = -495991.7591 HBOND = 0.0000  
 1-4 VDW = 1504.5755 1-4 EEL = 18629.5400 RESTRAINT = 0.0000

NSTEP ENERGY RMS GMAX NAME NUMBER  
 4200 -3.6963E+05 9.1967E-02 1.1361E+01 CE1 4295

BOND = 28592.2865 ANGLE = 1024.0040 DIHED = 5433.1436  
 VDWAALS = 71354.8166 EEL = -496166.2822 HBOND = 0.0000  
 1-4 VDW = 1504.4007 1-4 EEL = 18629.4276 RESTRAINT = 0.0000

NSTEP ENERGY RMS GMAX NAME NUMBER  
 4300 -3.6971E+05 2.3073E-01 3.7107E+01 CE1 4295

BOND = 28613.0665 ANGLE = 1023.9930 DIHED = 5432.8856  
 VDWAALS = 71431.9416 EEL = -496347.3792 HBOND = 0.0000  
 1-4 VDW = 1504.2191 1-4 EEL = 18629.2536 RESTRAINT = 0.0000

NSTEP ENERGY RMS GMAX NAME NUMBER  
 4400 -3.6980E+05 6.5940E-02 4.1776E+00 CE1 4295

BOND = 28629.5197 ANGLE = 1023.6695 DIHED = 5432.6823  
 VDWAALS = 71508.2030 EEL = -496523.9302 HBOND = 0.0000  
 1-4 VDW = 1504.0178 1-4 EEL = 18629.0171 RESTRAINT = 0.0000

NSTEP ENERGY RMS GMAX NAME NUMBER  
 4500 -3.6988E+05 1.8210E-01 2.8073E+01 CE1 4295



Supplementary Text 3

|         |   |            |         |   |              |           |   |           |
|---------|---|------------|---------|---|--------------|-----------|---|-----------|
| BOND    | = | 28649.3638 | ANGLE   | = | 1023.6940    | DIHED     | = | 5432.5193 |
| VDWAALS | = | 71586.1405 | EEL     | = | -496700.2771 | HBOND     | = | 0.0000    |
| 1-4 VDW | = | 1503.8322  | 1-4 EEL | = | 18628.7284   | RESTRAINT | = | 0.0000    |

|       |             |            |            |      |        |
|-------|-------------|------------|------------|------|--------|
| NSTEP | ENERGY      | RMS        | GMAX       | NAME | NUMBER |
| 4600  | -3.6995E+05 | 1.4625E-01 | 2.2198E+01 | CE1  | 4295   |

|         |   |            |         |   |              |           |   |           |
|---------|---|------------|---------|---|--------------|-----------|---|-----------|
| BOND    | = | 28667.1274 | ANGLE   | = | 1023.5582    | DIHED     | = | 5432.4164 |
| VDWAALS | = | 71663.9946 | EEL     | = | -496872.8122 | HBOND     | = | 0.0000    |
| 1-4 VDW | = | 1503.6264  | 1-4 EEL | = | 18628.3877   | RESTRAINT | = | 0.0000    |

|       |             |            |            |      |        |
|-------|-------------|------------|------------|------|--------|
| NSTEP | ENERGY      | RMS        | GMAX       | NAME | NUMBER |
| 4700  | -3.7003E+05 | 1.1834E-01 | 1.6957E+01 | CE1  | 4295   |

|         |   |            |         |   |              |           |   |           |
|---------|---|------------|---------|---|--------------|-----------|---|-----------|
| BOND    | = | 28684.6762 | ANGLE   | = | 1023.5645    | DIHED     | = | 5432.3493 |
| VDWAALS | = | 71742.1966 | EEL     | = | -497043.9552 | HBOND     | = | 0.0000    |
| 1-4 VDW | = | 1503.4356  | 1-4 EEL | = | 18628.0332   | RESTRAINT | = | 0.0000    |

|       |             |            |            |      |        |
|-------|-------------|------------|------------|------|--------|
| NSTEP | ENERGY      | RMS        | GMAX       | NAME | NUMBER |
| 4800  | -3.7010E+05 | 8.9065E-02 | 1.1228E+01 | CE1  | 4295   |

|         |   |            |         |   |              |           |   |           |
|---------|---|------------|---------|---|--------------|-----------|---|-----------|
| BOND    | = | 28701.7054 | ANGLE   | = | 1023.5616    | DIHED     | = | 5432.3279 |
| VDWAALS | = | 71818.2087 | EEL     | = | -497209.9717 | HBOND     | = | 0.0000    |
| 1-4 VDW | = | 1503.2390  | 1-4 EEL | = | 18627.6473   | RESTRAINT | = | 0.0000    |

|       |             |            |            |      |        |
|-------|-------------|------------|------------|------|--------|
| NSTEP | ENERGY      | RMS        | GMAX       | NAME | NUMBER |
| 4900  | -3.7018E+05 | 2.2767E-01 | 3.5888E+01 | CE1  | 4295   |

|         |   |            |         |   |              |           |   |           |
|---------|---|------------|---------|---|--------------|-----------|---|-----------|
| BOND    | = | 28721.0842 | ANGLE   | = | 1023.7886    | DIHED     | = | 5432.3323 |
| VDWAALS | = | 71895.7751 | EEL     | = | -497379.6785 | HBOND     | = | 0.0000    |
| 1-4 VDW | = | 1503.0453  | 1-4 EEL | = | 18627.2209   | RESTRAINT | = | 0.0000    |

|       |             |            |            |      |        |
|-------|-------------|------------|------------|------|--------|
| NSTEP | ENERGY      | RMS        | GMAX       | NAME | NUMBER |
| 5000  | -3.7025E+05 | 6.2254E-02 | 4.2246E+00 | CE1  | 4295   |

|         |   |            |         |   |              |           |   |           |
|---------|---|------------|---------|---|--------------|-----------|---|-----------|
| BOND    | = | 28735.8677 | ANGLE   | = | 1023.7488    | DIHED     | = | 5432.3510 |
| VDWAALS | = | 71970.5825 | EEL     | = | -497542.7263 | HBOND     | = | 0.0000    |
| 1-4 VDW | = | 1502.8557  | 1-4 EEL | = | 18626.7793   | RESTRAINT | = | 0.0000    |

Maximum number of minimization cycles reached.

FINAL RESULTS

|       |        |     |      |      |        |
|-------|--------|-----|------|------|--------|
| NSTEP | ENERGY | RMS | GMAX | NAME | NUMBER |
|-------|--------|-----|------|------|--------|

## Supplementary Text 3

|         |             |            |            |     |              |
|---------|-------------|------------|------------|-----|--------------|
| 5000    | -3.7025E+05 | 6.2254E-02 | 4.2246E+00 | CE1 | 4295         |
| BOND    | =           | 28735.8677 | ANGLE      | =   | 1023.7488    |
| VDWAALS | =           | 71970.5825 | EEL        | =   | -497542.7263 |
| 1-4 VDW | =           | 1502.8557  | 1-4 EEL    | =   | 18626.7793   |
|         |             |            | DIHED      | =   | 5432.3510    |
|         |             |            | HBOND      | =   | 0.0000       |
|         |             |            | RESTRAINT  | =   | 0.0000       |

## 5. TIMINGS

|                     |                           |
|---------------------|---------------------------|
| Build the list      | 26.60 (91.36% of List )   |
| Other               | 2.52 ( 8.64% of List )    |
| List time           | 29.12 ( 0.30% of Nonbo)   |
| Short_ene time      | 8705.69 (99.69% of Direc) |
| Other               | 27.42 ( 0.31% of Direc)   |
| Direct Ewald time   | 8733.11 (91.72% of Ewald) |
| Adjust Ewald time   | 32.32 ( 0.34% of Ewald)   |
| Fill Bspline coeffs | 24.45 ( 3.26% of Recip)   |
| Fill charge grid    | 106.50 (14.21% of Recip)  |
| Scalar sum          | 143.78 (19.19% of Recip)  |
| Grad sum            | 186.72 (24.92% of Recip)  |
| FFT time            | 287.87 (38.42% of Recip)  |
| Recip Ewald time    | 749.33 ( 7.87% of Ewald)  |
| Virial junk         | 2.02 ( 0.02% of Ewald)    |
| Other               | 4.56 ( 0.05% of Ewald)    |
| Ewald time          | 9521.36 (99.70% of Nonbo) |
| Nonbond force       | 9550.48 (99.53% of Force) |
| Bond/Angle/Dihedral | 44.35 ( 0.46% of Force)   |
| Other               | 1.10 ( 0.01% of Force)    |
| Force time          | 9595.94 (100.0% of Runmd) |
| Runmd Time          | 9595.94 (99.72% of Total) |
| Other               | 26.75 ( 0.28% of Total)   |
| Total time          | 9622.71 (100.0% of ALL )  |

Number of list builds : 18

Highest rstack allocated: 4941880  
Highest istack allocated: 92322  
Job began at 17:17:31.941 on 02/20/2019  
Setup done at 17:17:32.739 on 02/20/2019  
Run done at 19:57:54.656 on 02/20/2019  
wallclock() was called 190084 times
