# Supplementary material for: Insights into the mechanism(s) of digestion of crystalline cellulose by plant class C GH9 endoglucanases
Source: PubMed Central journal article supplement (PMC7385011; doi:10.1007/s00894-019-4133-1), 2019-07-23
Supplement: 894_2019_4133_MOESM8_ESM.pdf [file 894_2019_4133_MOESM8_ESM.pdf]

## Supplementary Text 6

40.1ns Q93WY9 SIMULATION DATA

|              | TS<br>ELECT<br>TOTAL<br>PRESSURE | BOND<br>VDW<br>TEMP<br>GPRESSURE | ANGLE<br>BOUNDARY<br>POTENTIAL<br>VOLUME | DIHED<br>MISC<br>TOTAL3<br>PRESSAVG | IMPRP<br>KINETIC<br>TEMPAVG<br>GPRESSAVG |
|--------------|----------------------------------|----------------------------------|------------------------------------------|-------------------------------------|------------------------------------------|
| [191]ENERGY: | 0                                | 4999.8078                        | 5466.3194                                | 5772.4511                           | 305.5429                                 |
|              | -8134.0996                       | -1843.7802                       | 0.0000                                   | 0.0000                              | 7775.6378                                |
|              | 14341.8792                       | 296.4639                         | 6566.2414                                | 14454.0148                          | 296.4639                                 |
|              | 2906.9481                        | 466.8796                         | 728456.8384                              | 2906.9481                           | 466.8796                                 |
| [279]ENERGY: | 10000                            | 3189.6290                        | 5372.8645                                | 5772.7262                           | 352.9152                                 |
|              | -13312.4858                      | -1563.0828                       | 0.0000                                   | 0.0000                              | 7870.9213                                |
|              | 7683.4877                        | 300.0968                         | -187.4337                                | 7747.4660                           | 321.8834                                 |
|              | 144.3399                         | 115.6437                         | 735475.2369                              | -0.1284                             | -0.0147                                  |
| [318]ENERGY: | 20000                            | 3310.7142                        | 5348.7964                                | 5717.9680                           | 311.8514                                 |
|              | -13460.3565                      | -1639.6275                       | 0.0000                                   | 0.0000                              | 7741.3509                                |
|              | 7330.6969                        | 295.1566                         | -410.6541                                | 7392.8458                           | 298.4916                                 |
|              | -3.6076                          | 1.8687                           | 733208.9482                              | 0.4936                              | 0.5063                                   |
| [370]ENERGY: | 30000                            | 3302.4411                        | 5332.2753                                | 5771.1947                           | 343.8806                                 |
|              | -13640.7224                      | -1565.0050                       | 0.0000                                   | 0.0000                              | 7816.0831                                |
|              | 7360.1475                        | 298.0060                         | -455.9356                                | 7423.0826                           | 300.4791                                 |
|              | 6.5075                           | 30.1525                          | 728537.4003                              | 0.3582                              | 0.3695                                   |
| [408]ENERGY: | 40000                            | 3328.1596                        | 5339.2590                                | 5771.9647                           | 355.1878                                 |
|              | -13780.5478                      | -1570.1671                       | 0.0000                                   | 0.0000                              | 7826.2029                                |
|              | 7270.0592                        | 298.3918                         | -556.1438                                | 7336.5472                           | 297.1183                                 |
|              | -8.6407                          | -20.8424                         | 711892.0438                              | 3.9213                              | 3.9026                                   |
| [460]ENERGY: | 50000                            | 3307.5300                        | 5307.8902                                | 5759.1695                           | 331.4808                                 |
|              | -13748.2327                      | -1568.5930                       | 0.0000                                   | 0.0000                              | 7821.5762                                |
|              | 7210.8211                        | 298.2154                         | -610.7551                                | 7276.9016                           | 300.3920                                 |
|              | -19.3502                         | 1.6552                           | 706270.9176                              | -0.2569                             | -0.2358                                  |
| [498]ENERGY: | 60000                            | 3149.7592                        | 5420.0209                                | 5734.5158                           | 329.9383                                 |
|              | -13670.4110                      | -1623.8743                       | 0.0000                                   | 0.0000                              | 7902.4475                                |
|              | 7242.3965                        | 301.2988                         | -660.0510                                | 7308.5010                           | 296.6690                                 |
|              | 124.6850                         | 97.9537                          | 715705.2994                              | 0.6945                              | 0.6735                                   |
| [549]ENERGY: | 70000                            | 3287.2150                        | 5366.8327                                | 5734.7017                           | 335.7602                                 |
|              | -13647.8582                      | -1724.9439                       | 0.0000                                   | 0.0000                              | 7834.8640                                |
|              | 7186.5715                        | 298.7220                         | -648.2926                                | 7248.7653                           | 299.3904                                 |
|              | -164.3345                        | -89.9533                         | 712000.6865                              | -0.8037                             | -0.7991                                  |
| [586]ENERGY: | 80000                            | 3241.9688                        | 5273.0821                                | 5778.4420                           | 351.7036                                 |
|              | -13716.4847                      | -1674.4155                       | 0.0000                                   | 0.0000                              | 7964.2153                                |
|              | 7218.5116                        | 303.6539                         | -745.7037                                | 7283.3567                           | 298.5708                                 |
|              | -74.3919                         | -92.3141                         | 734696.9518                              | -0.7541                             | -0.7668                                  |
| [637]ENERGY: | 90000                            | 3238.6281                        | 5310.1939                                | 5824.2163                           | 337.9477                                 |
|              | -13765.8102                      | -1631.1465                       | 0.0000                                   | 0.0000                              | 7746.5284                                |
|              | 7060.5577                        | 295.3540                         | -685.9707                                | 7129.2999                           | 298.5867                                 |
|              | -2.7227                          | -80.7479                         | 736230.1953                              | 0.8356                              | 0.8478                                   |
| [677]ENERGY: | 100000                           | 3236.3599                        | 5307.7785                                | 5747.8780                           | 332.6728                                 |
|              | -13771.0064                      | -1711.6380                       | 0.0000                                   | 0.0000                              | 7850.5704                                |
|              | 6992.6153                        | 299.3209                         | -857.9551                                | 7057.1860                           | 296.9325                                 |
|              | 89.1388                          | -14.9513                         | 705965.2972                              | -1.7908                             | -1.7687                                  |
| [728]ENERGY: | 110000                           | 3222.0286                        | 5327.8896                                | 5788.5150                           | 313.7196                                 |
|              | -13879.8678                      | -1597.8366                       | 0.0000                                   | 0.0000                              | 7863.3914                                |
|              | 7037.8400                        | 299.8097                         | -825.5515                                | 7103.8962                           | 297.0375                                 |
|              | -18.0528                         | -89.7528                         | 680241.2341                              | 3.4264                              | 3.4213                                   |

Supplementary Text 6

|               |             |             |             |             |           |
|---------------|-------------|-------------|-------------|-------------|-----------|
| [764]ENERGY:  | 120000      | 3245.8473   | 5352.3219   | 5717.1681   | 347.0089  |
|               | -13854.5421 | -1645.5611  | 0.0000      | 0.0000      | 7695.9106 |
|               | 6858.1536   | 293.4241    | -837.7571   | 6920.7460   | 297.1428  |
|               | -188.2022   | -151.4988   | 666180.6792 | -2.1118     | -2.1215   |
| [814]ENERGY:  | 130000      | 3271.2315   | 5411.9784   | 5720.3573   | 326.8963  |
|               | -13866.7089 | -1679.5346  | 0.0000      | 0.0000      | 7765.0022 |
|               | 6949.2222   | 296.0584    | -815.7800   | 7011.3369   | 296.7823  |
|               | -4.8745     | -58.4113    | 675134.1117 | 4.3739      | 4.3867    |
| [850]ENERGY:  | 140000      | 3299.8419   | 5403.6674   | 5734.4972   | 344.6452  |
|               | -13848.4665 | -1689.7605  | 0.0000      | 0.0000      | 7824.5560 |
|               | 7068.9806   | 298.3290    | -755.5753   | 7133.7471   | 297.7924  |
|               | 19.1598     | -6.9990     | 673243.8452 | 0.4809      | 0.4586    |
| [900]ENERGY:  | 150000      | 3241.4089   | 5433.0005   | 5742.7048   | 321.9516  |
|               | -13872.8761 | -1653.3276  | 0.0000      | 0.0000      | 7866.2599 |
|               | 7079.1220   | 299.9191    | -787.1380   | 7145.8130   | 299.7096  |
|               | 98.5067     | 133.0162    | 691319.4090 | 3.7687      | 3.7796    |
| [936]ENERGY:  | 160000      | 3220.4833   | 5350.9896   | 5765.7775   | 320.9108  |
|               | -13780.5275 | -1602.3484  | 0.0000      | 0.0000      | 7806.5467 |
|               | 7081.8319   | 297.6424    | -724.7148   | 7142.7774   | 298.4003  |
|               | 49.6024     | 81.1187     | 688945.9496 | 1.7483      | 1.7652    |
| [986]ENERGY:  | 170000      | 3322.8100   | 5345.3153   | 5776.6333   | 325.2419  |
|               | -13905.9005 | -1645.0953  | 0.0000      | 0.0000      | 7851.8029 |
|               | 7070.8075   | 299.3679    | -780.9954   | 7132.7989   | 298.9419  |
|               | 44.6247     | 39.1822     | 707705.8740 | -1.8875     | -1.8784   |
| [1022]ENERGY: | 180000      | 3304.3984   | 5383.4209   | 5663.6439   |           |
|               | 339.4317    | -13886.9689 | -1594.7025  | 0.0000      | 0.0000    |
|               | 7975.4606   | 7184.6841   | 304.0826    | -790.7764   | 7254.6895 |
|               | 300.0251    | 60.1850     | 22.4443     | 712211.8218 | 0.7402    |
|               | 0.7168      |             |             |             |           |
| [1072]ENERGY: | 190000      | 3298.2445   | 5425.2535   | 5766.6753   |           |
|               | 324.3027    | -13928.3065 | -1644.1822  | 0.0000      | 0.0000    |
|               | 7846.2674   | 7088.2547   | 299.1568    | -758.0127   | 7150.6231 |
|               | 299.9245    | -72.3984    | -84.1196    | 692626.9100 | 3.6727    |
|               | 3.6821      |             |             |             |           |
| [1111]ENERGY: | 200000      | 3303.6705   | 5329.4833   | 5763.5689   |           |
|               | 334.6463    | -13898.3785 | -1577.8792  | 0.0000      | 0.0000    |
|               | 7669.0404   | 6924.1518   | 292.3996    | -744.8886   | 6988.4459 |
|               | 298.8470    | -20.5065    | 43.0158     | 672354.0153 | 4.4785    |
|               | 4.4616      |             |             |             |           |
| [1161]ENERGY: | 210000      | 3270.7582   | 5466.8753   | 5659.8662   |           |
|               | 339.9722    | -13958.2659 | -1587.0602  | 0.0000      | 0.0000    |
|               | 7750.6770   | 6942.8227   | 295.5122    | -807.8543   | 7006.6020 |
|               | 299.1548    | -5.3515     | 6.3538      | 690244.7411 | 2.1653    |
|               | 2.1694      |             |             |             |           |
| [1197]ENERGY: | 220000      | 3234.2794   | 5437.9984   | 5678.3187   |           |
|               | 336.3131    | -13876.8442 | -1623.9096  | 0.0000      | 0.0000    |
|               | 7766.9305   | 6953.0864   | 296.1319    | -813.8441   | 7014.7317 |
|               | 299.6224    | 133.2029    | 1.3342      | 663258.2835 | 0.5533    |
|               | 0.5398      |             |             |             |           |
| [1247]ENERGY: | 230000      | 3260.9418   | 5487.7609   | 5679.7587   |           |
|               | 336.5154    | -13924.7825 | -1660.1468  | 0.0000      | 0.0000    |
|               | 7877.2753   | 7057.3228   | 300.3391    | -819.9525   | 7122.5849 |
|               | 297.1957    | 58.3036     | 43.6604     | 644431.2248 | -3.0436   |
|               | -3.0354     |             |             |             |           |

## Supplementary Text 6

|               |             |            |             |           |
|---------------|-------------|------------|-------------|-----------|
| [1283]ENERGY: | 240000      | 3282.0198  | 5392.5443   | 5684.4089 |
| 357.4245      | -13955.4977 | -1597.2995 | 0.0000      | 0.0000    |
| 7769.8185     | 6933.4189   | 296.2420   | -836.3996   | 6991.7494 |
| 299.2619      | 114.1427    | 23.3173    | 667654.0578 | 1.5756    |
| 1.5592        |             |            |             |           |
| [1333]ENERGY: | 250000      | 3235.9803  | 5410.8250   | 5689.0952 |
| 341.0679      | -13956.6865 | -1613.8646 | 0.0000      | 0.0000    |
| 7813.1439     | 6919.5611   | 297.8939   | -893.5828   | 6984.4207 |
| 296.8334      | 135.1558    | 1.1311     | 652624.1953 | 2.7407    |
| 2.7459        |             |            |             |           |
| [1369]ENERGY: | 260000      | 3259.2161  | 5383.3947   | 5719.5083 |
| 339.6894      | -13926.3447 | -1633.9289 | 0.0000      | 0.0000    |
| 7896.0904     | 7037.6254   | 301.0564   | -858.4650   | 7101.9220 |
| 298.5331      | -64.7558    | -82.8163   | 672280.3830 | 0.1235    |
| 0.1345        |             |            |             |           |
| [1419]ENERGY: | 270000      | 3236.5942  | 5466.9394   | 5722.2395 |
| 338.4589      | -13957.4198 | -1655.6909 | 0.0000      | 0.0000    |
| 7851.1847     | 7002.3059   | 299.3443   | -848.8788   | 7070.0726 |
| 299.5463      | 65.2941     | -14.7453   | 665605.2257 | 2.0154    |
| 1.9898        |             |            |             |           |
| [1455]ENERGY: | 280000      | 3315.8239  | 5445.7966   | 5726.1096 |
| 303.3124      | -14018.3714 | -1673.8364 | 0.0000      | 0.0000    |
| 7847.8863     | 6946.7209   | 299.2186   | -901.1654   | 7010.1424 |
| 299.7178      | -193.3945   | -105.9713  | 670041.0728 | -3.9643   |
| -3.9421       |             |            |             |           |
| [1505]ENERGY: | 290000      | 3214.1677  | 5421.9023   | 5715.5375 |
| 335.8627      | -13908.8344 | -1604.9225 | 0.0000      | 0.0000    |
| 7777.8188     | 6951.5321   | 296.5471   | -826.2867   | 7014.7788 |
| 298.3414      | 120.9856    | 93.7366    | 654907.7751 | 1.4212    |
| 1.4079        |             |            |             |           |
| [1544]ENERGY: | 300000      | 3301.5510  | 5437.6849   | 5688.7394 |
| 336.5595      | -13909.9324 | -1682.1126 | 0.0000      | 0.0000    |
| 7781.8448     | 6954.3346   | 296.7006   | -827.5101   | 7017.5132 |
| 297.7865      | -12.6179    | -89.2738   | 670824.8626 | 4.4300    |
| 4.4153        |             |            |             |           |
| [1594]ENERGY: | 310000      | 3291.7837  | 5367.5769   | 5749.7393 |
| 326.9678      | -13914.1023 | -1612.3211 | 0.0000      | 0.0000    |
| 7773.0371     | 6982.6815   | 296.3648   | -790.3556   | 7042.4926 |
| 298.9349      | 99.5621     | 12.7929    | 642216.2702 | -0.3007   |
| -0.2513       |             |            |             |           |
| [1630]ENERGY: | 320000      | 3361.9638  | 5360.7632   | 5737.8385 |
| 336.6761      | -13969.6801 | -1692.3265 | 0.0000      | 0.0000    |
| 7788.5288     | 6923.7638   | 296.9554   | -864.7650   | 6989.3741 |
| 298.0580      | -74.4160    | -128.1646  | 648221.4198 | 1.6609    |
| 1.6289        |             |            |             |           |
| [1680]ENERGY: | 330000      | 3304.0422  | 5388.9137   | 5704.1670 |
| 325.7263      | -13977.2603 | -1631.9901 | 0.0000      | 0.0000    |
| 7877.2909     | 6990.8898   | 300.3397   | -886.4012   | 7057.1005 |
| 297.3733      | 74.0362     | 27.4887    | 642829.7681 | 1.9855    |
| 2.0001        |             |            |             |           |
| [1716]ENERGY: | 340000      | 3250.8072  | 5324.0818   | 5710.1313 |
| 345.1865      | -14055.7796 | -1629.8709 | 0.0000      | 0.0000    |
| 7828.8611     | 6773.4175   | 298.4932   | -1055.4437  | 6836.7832 |
| 299.3579      | 83.6228     | 47.8290    | 642015.6588 | 2.3969    |

Supplementary Text 6

2.3803  
 [1766]ENERGY: 350000 3217.6963 5404.0071 5678.2123  
 335.1649 -13984.1365 -1657.2724 0.0000 0.0000  
 7769.8528 6763.5245 296.2433 -1006.3283 6827.2906  
 297.4133 -68.9166 -21.1554 648346.6755 -2.3845  
 -2.3718  
 [1802]ENERGY: 360000 3306.1552 5408.5819 5706.5150  
 321.9875 -13946.9753 -1708.7793 0.0000 0.0000  
 7775.6491 6863.1340 296.4643 -912.5151 6922.3080  
 299.5995 44.2840 -1.1775 642139.2257 3.2545  
 3.2627  
 [1852]ENERGY: 370000 3181.2185 5420.2693 5718.6141  
 347.1248 -13932.6976 -1690.7947 0.0000 0.0000  
 7875.7680 6919.5024 300.2816 -956.2656 6985.3413  
 297.4473 47.0914 -53.3378 674614.8953 -1.2324  
 -1.2489  
 [1888]ENERGY: 380000 3287.5787 5470.4857 5703.5595  
 342.3122 -13934.9289 -1643.2190 0.0000 0.0000  
 7781.6225 7007.4107 296.6921 -774.2118 7068.8710  
 298.2815 52.1228 10.8856 703524.3334 0.6326  
 0.6454  
 [1938]ENERGY: 390000 3280.5097 5327.8737 5686.4201  
 321.3249 -13937.7121 -1655.9780 0.0000 0.0000  
 7813.2555 6835.6938 297.8982 -977.5617 6903.0777  
 299.2872 -8.0749 -56.6040 722412.6307 -1.0304  
 -1.0323  
 [1977]ENERGY: 400000 3182.4184 5436.7659 5729.3467  
 332.7414 -13983.9860 -1627.8365 0.0000 0.0000  
 7793.6403 6863.0902 297.1503 -930.5501 6925.0803  
 298.9829 -51.7531 -62.6404 726932.9185 2.5828  
 2.5814  
 [2027]ENERGY: 410000 3235.9592 5359.1469 5727.0011  
 323.2636 -13942.7613 -1611.6800 0.0000 0.0000  
 7926.4547 7017.3842 302.2141 -909.0705 7084.9219  
 298.1497 119.4820 90.7809 715121.3958 2.4100  
 2.4218  
 [2063]ENERGY: 420000 3312.3825 5417.5419 5675.9026  
 335.8374 -13996.0908 -1604.6852 0.0000 0.0000  
 7868.3569 7009.2452 299.9990 -859.1117 7076.3410  
 298.4195 -69.9731 -26.4544 751271.7299 2.1821  
 2.1589  
 [2113]ENERGY: 430000 3228.8452 5422.3213 5692.0887  
 331.0327 -13977.2814 -1607.4655 0.0000 0.0000  
 7939.4322 7028.9732 302.7089 -910.4589 7094.1267  
 300.8373 130.1503 99.6312 748868.5549 4.6291  
 4.6387  
 [2149]ENERGY: 440000 3317.0937 5459.0389 5684.4332  
 331.1039 -14079.7984 -1556.6470 0.0000 0.0000  
 7955.5099 7110.7342 303.3219 -844.7757 7172.5279  
 301.0266 56.8317 77.3616 775569.8950 1.4706  
 1.4809  
 [2199]ENERGY: 450000 3199.9456 5415.2450 5694.0876  
 329.8241 -13922.2607 -1655.0573 0.0000 0.0000  
 7869.1907 6930.9749 300.0308 -938.2158 6998.6283

Supplementary Text 6

|               |             |            |             |           |
|---------------|-------------|------------|-------------|-----------|
| 298.8155      | -109.5392   | -117.9133  | 763203.5692 | -0.1502   |
| -0.1648       |             |            |             |           |
| [2235]ENERGY: | 460000      | 3284.8034  | 5345.5300   | 5650.8951 |
| 340.3515      | -13867.5213 | -1704.4346 | 0.0000      | 0.0000    |
| 7747.5544     | 6797.1786   | 295.3932   | -950.3759   | 6860.8472 |
| 298.3193      | -110.9667   | -107.0490  | 771921.1152 | 0.9352    |
| 0.9228        |             |            |             |           |
| [2285]ENERGY: | 470000      | 3208.1614  | 5369.0488   | 5707.6233 |
| 332.5892      | -14026.5240 | -1575.8828 | 0.0000      | 0.0000    |
| 7887.5670     | 6902.5829   | 300.7315   | -984.9841   | 6963.2897 |
| 297.3935      | 138.2403    | 115.1405   | 750029.1887 | 2.5443    |
| 2.5425        |             |            |             |           |
| [2321]ENERGY: | 480000      | 3317.7552  | 5385.2364   | 5709.5449 |
| 319.6456      | -13957.4189 | -1610.7283 | 0.0000      | 0.0000    |
| 7816.1561     | 6980.1910   | 298.0088   | -835.9651   | 7043.4918 |
| 298.7276      | -4.8237     | 24.2269    | 740907.4338 | 0.7009    |
| 0.7000        |             |            |             |           |
| [2371]ENERGY: | 490000      | 3222.0445  | 5361.4632   | 5640.6155 |
| 305.5886      | -13956.6233 | -1597.9446 | 0.0000      | 0.0000    |
| 7765.4219     | 6740.5659   | 296.0744   | -1024.8560  | 6804.6173 |
| 297.9561      | 93.0425     | 79.8546    | 732734.2057 | 0.1310    |
| 0.1207        |             |            |             |           |
| [2410]ENERGY: | 500000      | 3249.7353  | 5376.5026   | 5718.9523 |
| 342.3969      | -13976.0588 | -1621.7013 | 0.0000      | 0.0000    |
| 7766.6257     | 6856.4527   | 296.1203   | -910.1730   | 6920.0987 |
| 296.6705      | 14.0501     | -25.5571   | 737264.6681 | -0.1526   |
| -0.1563       |             |            |             |           |
| [2460]ENERGY: | 510000      | 3230.6175  | 5442.8395   | 5653.7768 |
| 351.3087      | -13996.1414 | -1642.5414 | 0.0000      | 0.0000    |
| 7842.2638     | 6882.1234   | 299.0042   | -960.1403   | 6945.0475 |
| 298.4663      | -39.0496    | -48.3517   | 715952.9136 | 0.6846    |
| 0.7016        |             |            |             |           |
| [2496]ENERGY: | 520000      | 3231.5730  | 5387.1996   | 5722.8011 |
| 330.0320      | -14040.4860 | -1641.2392 | 0.0000      | 0.0000    |
| 7792.3520     | 6782.2324   | 297.1012   | -1010.1196  | 6846.3878 |
| 297.0418      | 73.4665     | 0.2830     | 727123.7940 | 4.6682    |
| 4.6607        |             |            |             |           |
| [2546]ENERGY: | 530000      | 3259.5345  | 5550.0297   | 5719.5473 |
| 303.8027      | -14066.7780 | -1659.3348 | 0.0000      | 0.0000    |
| 7906.2764     | 7013.0777   | 301.4448   | -893.1988   | 7079.2904 |
| 300.2209      | -19.4291    | 11.8341    | 780115.6322 | -3.1171   |
| -3.1137       |             |            |             |           |
| [2582]ENERGY: | 540000      | 3235.5371  | 5402.8813   | 5692.9369 |
| 314.8675      | -14003.4274 | -1646.9159 | 0.0000      | 0.0000    |
| 7899.3017     | 6895.1814   | 301.1789   | -1004.1203  | 6961.0198 |
| 299.2561      | 122.1470    | 126.4585   | 755425.4658 | 2.3829    |
| 2.3739        |             |            |             |           |
| [2632]ENERGY: | 550000      | 3215.8780  | 5348.6171   | 5700.1722 |
| 346.0287      | -13903.2201 | -1694.5235 | 0.0000      | 0.0000    |
| 7780.2355     | 6793.1879   | 296.6392   | -987.0477   | 6856.3338 |
| 299.0800      | -2.6654     | 12.6989    | 758446.2796 | 2.7832    |
| 2.7679        |             |            |             |           |
| [2668]ENERGY: | 560000      | 3264.7875  | 5332.1288   | 5721.2256 |
| 329.8433      | -14025.6564 | -1671.8250 | 0.0000      | 0.0000    |

Supplementary Text 6

|               |             |            |             |           |
|---------------|-------------|------------|-------------|-----------|
| 7796.2336     | 6746.7373   | 297.2492   | -1049.4963  | 6811.9738 |
| 297.5905      | -36.4256    | -48.3576   | 759825.3431 | -0.6703   |
| -0.6691       |             |            |             |           |
| [2718]ENERGY: | 570000      | 3223.7730  | 5340.8040   | 5730.4644 |
| 311.9277      | -14022.3019 | -1601.0836 | 0.0000      | 0.0000    |
| 7928.8285     | 6912.4121   | 302.3047   | -1016.4163  | 6977.6452 |
| 298.3046      | 1.0875      | 57.7949    | 746617.1774 | -2.4779   |
| -2.4760       |             |            |             |           |
| [2754]ENERGY: | 580000      | 3215.1177  | 5338.0845   | 5737.4726 |
| 330.7121      | -14044.4279 | -1613.5983 | 0.0000      | 0.0000    |
| 7882.1702     | 6845.5309   | 300.5257   | -1036.6393  | 6914.2155 |
| 299.6784      | 5.3637      | 87.8232    | 747721.2050 | -2.7072   |
| -2.7013       |             |            |             |           |
| [2804]ENERGY: | 590000      | 3226.5214  | 5342.2645   | 5738.8081 |
| 312.6248      | -13980.0761 | -1570.7331 | 0.0000      | 0.0000    |
| 7629.4797     | 6698.8893   | 290.8913   | -930.5904   | 6760.9874 |
| 298.0199      | 205.3331    | 186.5452   | 704012.3720 | -0.3842   |
| -0.3969       |             |            |             |           |
| [2843]ENERGY: | 600000      | 3266.7187  | 5475.4902   | 5732.6939 |
| 348.6558      | -14092.7820 | -1698.4657 | 0.0000      | 0.0000    |
| 7857.2037     | 6889.5146   | 299.5738   | -967.6891   | 6953.4634 |
| 297.6639      | -15.7694    | -24.5487   | 725539.2592 | 3.5216    |
| 3.5033        |             |            |             |           |
| [2893]ENERGY: | 610000      | 3302.6022  | 5298.5061   | 5681.2670 |
| 313.8317      | -14045.4501 | -1645.5659 | 0.0000      | 0.0000    |
| 7810.2571     | 6715.4481   | 297.7839   | -1094.8090  | 6780.2727 |
| 297.3322      | 55.7743     | 21.4891    | 756778.9675 | 0.1689    |
| 0.1706        |             |            |             |           |
| [2929]ENERGY: | 620000      | 3199.3516  | 5390.8425   | 5676.3784 |
| 340.2000      | -14005.7476 | -1703.7780 | 0.0000      | 0.0000    |
| 7703.5396     | 6600.7864   | 293.7150   | -1102.7532  | 6664.4538 |
| 297.8343      | -54.6534    | -60.6829   | 780190.4471 | 3.1727    |
| 3.1957        |             |            |             |           |
| [2979]ENERGY: | 630000      | 3227.9160  | 5350.5511   | 5733.6949 |
| 342.4140      | -14021.3379 | -1650.9258 | 0.0000      | 0.0000    |
| 7926.1866     | 6908.4991   | 302.2039   | -1017.6876  | 6976.8855 |
| 298.3260      | 54.4327     | 20.5465    | 779945.2728 | -0.7909   |
| -0.7867       |             |            |             |           |
| [3015]ENERGY: | 640000      | 3224.3778  | 5393.5915   | 5644.7400 |
| 337.2225      | -14081.7057 | -1649.1929 | 0.0000      | 0.0000    |
| 7853.0404     | 6722.0735   | 299.4151   | -1130.9668  | 6784.7613 |
| 297.6203      | 93.7497     | 64.3105    | 794131.4452 | 0.4322    |
| 0.4319        |             |            |             |           |
| [3065]ENERGY: | 650000      | 3211.2961  | 5384.2846   | 5649.7980 |
| 323.2831      | -14087.9994 | -1653.6166 | 0.0000      | 0.0000    |
| 7825.8856     | 6652.9313   | 298.3797   | -1172.9543  | 6712.1038 |
| 299.3709      | 38.0915     | 8.7455     | 807527.2540 | 1.7360    |
| 1.7491        |             |            |             |           |
| [3101]ENERGY: | 660000      | 3304.8021  | 5351.7865   | 5642.5121 |
| 345.9410      | -14066.3151 | -1624.0891 | 0.0000      | 0.0000    |
| 7840.2974     | 6794.9350   | 298.9292   | -1045.3624  | 6856.3939 |
| 298.7503      | 52.5558     | 5.7695     | 786396.2731 | -0.5361   |
| -0.5521       |             |            |             |           |
| [3151]ENERGY: | 670000      | 3270.7216  | 5406.3859   | 5605.0217 |

Supplementary Text 6

|               |             |            |             |           |
|---------------|-------------|------------|-------------|-----------|
| 343.5747      | -13969.6026 | -1678.3608 | 0.0000      | 0.0000    |
| 7868.5888     | 6846.3293   | 300.0079   | -1022.2595  | 6908.6877 |
| 299.2083      | -120.2489   | -135.5122  | 778878.3072 | -0.7877   |
| -0.7615       |             |            |             |           |
| [3187]ENERGY: | 680000      | 3268.5043  | 5441.2502   | 5687.9078 |
| 319.8395      | -14018.0024 | -1662.9773 | 0.0000      | 0.0000    |
| 7857.7386     | 6894.2608   | 299.5942   | -963.4779   | 6959.2690 |
| 299.6854      | -99.7076    | -108.3319  | 740106.6255 | 2.2166    |
| 2.2037        |             |            |             |           |
| [3237]ENERGY: | 690000      | 3264.2183  | 5378.9984   | 5718.5831 |
| 348.2574      | -14125.0227 | -1630.1571 | 0.0000      | 0.0000    |
| 7840.2173     | 6795.0946   | 298.9262   | -1045.1227  | 6858.3988 |
| 298.1286      | -25.0743    | 20.6720    | 724938.4926 | -0.5169   |
| -0.5313       |             |            |             |           |
| [3276]ENERGY: | 700000      | 3273.7671  | 5301.5310   | 5718.7966 |
| 338.8485      | -14031.0057 | -1686.5259 | 0.0000      | 0.0000    |
| 7847.1948     | 6762.6065   | 299.1922   | -1084.5883  | 6824.7635 |
| 298.7304      | 50.6020     | -10.7668   | 724194.0809 | 3.6772    |
| 3.6852        |             |            |             |           |
| [3326]ENERGY: | 710000      | 3219.6100  | 5436.3716   | 5704.1009 |
| 338.9782      | -14055.7003 | -1665.6235 | 0.0000      | 0.0000    |
| 7859.3799     | 6837.1167   | 299.6568   | -1022.2632  | 6901.8822 |
| 298.3270      | -24.9984    | -20.7040   | 710720.2061 | -0.0236   |
| -0.0081       |             |            |             |           |
| [3362]ENERGY: | 720000      | 3282.1918  | 5347.9030   | 5712.0321 |
| 358.7092      | -13977.0497 | -1725.2190 | 0.0000      | 0.0000    |
| 7848.1292     | 6846.6964   | 299.2278   | -1001.4327  | 6909.5410 |
| 298.8771      | -7.3693     | 9.1479     | 693383.8657 | -1.3991   |
| -1.4213       |             |            |             |           |
| [3412]ENERGY: | 730000      | 3205.5226  | 5402.4972   | 5657.6895 |
| 333.1609      | -14094.0439 | -1602.9395 | 0.0000      | 0.0000    |
| 7904.8648     | 6806.7516   | 301.3910   | -1098.1132  | 6874.3970 |
| 299.9713      | 79.8184     | 88.7274    | 690716.4583 | 1.7037    |
| 1.7168        |             |            |             |           |
| [3448]ENERGY: | 740000      | 3281.3515  | 5422.5087   | 5632.3714 |
| 347.6282      | -14066.2596 | -1711.5042 | 0.0000      | 0.0000    |
| 7922.0177     | 6828.1138   | 302.0450   | -1093.9040  | 6893.0338 |
| 299.4270      | 48.6284     | -17.4648   | 707241.4812 | 3.5943    |
| 3.5861        |             |            |             |           |
| [3498]ENERGY: | 750000      | 3224.2971  | 5354.2414   | 5670.9839 |
| 331.5271      | -14110.3028 | -1649.7442 | 0.0000      | 0.0000    |
| 7867.0429     | 6688.0452   | 299.9489   | -1178.9976  | 6751.5102 |
| 298.8985      | -31.4413    | -21.5830   | 679316.7253 | 4.5655    |
| 4.5655        |             |            |             |           |
| [3534]ENERGY: | 760000      | 3242.3149  | 5523.6384   | 5651.6948 |
| 343.3278      | -14080.5905 | -1676.2750 | 0.0000      | 0.0000    |
| 7776.9372     | 6781.0476   | 296.5135   | -995.8895   | 6844.7851 |
| 300.0697      | 179.7338    | 109.6929   | 672587.6303 | -0.2739   |
| -0.2620       |             |            |             |           |
| [3584]ENERGY: | 770000      | 3221.0673  | 5406.3014   | 5647.4158 |
| 319.6749      | -13975.3458 | -1676.0278 | 0.0000      | 0.0000    |
| 7927.5026     | 6870.5884   | 302.2541   | -1056.9142  | 6932.2409 |
| 299.5592      | 87.5886     | 19.7775    | 676157.6194 | 0.7502    |
| 0.7323        |             |            |             |           |

## Supplementary Text 6

|               |             |            |             |           |
|---------------|-------------|------------|-------------|-----------|
| [3620]ENERGY: | 780000      | 3278.3228  | 5432.2522   | 5674.0608 |
| 356.2722      | -14060.3074 | -1695.7914 | 0.0000      | 0.0000    |
| 7947.7278     | 6932.5369   | 303.0252   | -1015.1909  | 7003.2488 |
| 299.7970      | 89.4942     | 21.9896    | 666165.4678 | 3.2304    |
| 3.2285        |             |            |             |           |
| [3670]ENERGY: | 790000      | 3256.7714  | 5452.4393   | 5681.6510 |
| 343.8038      | -14147.2693 | -1666.0795 | 0.0000      | 0.0000    |
| 7739.6199     | 6660.9365   | 295.0906   | -1078.6834  | 6723.6447 |
| 299.9063      | 77.8376     | 62.5178    | 636173.1521 | -1.0018   |
| -0.9833       |             |            |             |           |
| [3709]ENERGY: | 800000      | 3221.0457  | 5343.7904   | 5663.2167 |
| 318.5267      | -14104.1157 | -1623.3563 | 0.0000      | 0.0000    |
| 7819.5126     | 6638.6203   | 298.1367   | -1180.8924  | 6704.2450 |
| 296.8575      | 50.4465     | 22.8922    | 621753.5797 | -0.2462   |
| -0.2353       |             |            |             |           |
| [3759]ENERGY: | 810000      | 3293.9612  | 5364.3481   | 5648.4852 |
| 321.5073      | -14089.7297 | -1676.2118 | 0.0000      | 0.0000    |
| 7797.3674     | 6659.7277   | 297.2924   | -1137.6397  | 6722.4222 |
| 297.8053      | 82.4238     | 52.3176    | 632578.3560 | 3.2397    |
| 3.2321        |             |            |             |           |
| [3795]ENERGY: | 820000      | 3189.2135  | 5349.0251   | 5649.6275 |
| 328.1309      | -14125.1694 | -1682.5152 | 0.0000      | 0.0000    |
| 7826.7339     | 6535.0463   | 298.4121   | -1291.6876  | 6598.4541 |
| 297.4417      | 34.1952     | -20.1875   | 613491.0019 | -3.4198   |
| -3.4026       |             |            |             |           |
| [3845]ENERGY: | 830000      | 3262.8894  | 5348.1664   | 5663.7297 |
| 350.3915      | -14008.3684 | -1681.2495 | 0.0000      | 0.0000    |
| 7800.9829     | 6736.5420   | 297.4302   | -1064.4408  | 6799.2468 |
| 298.5060      | -12.6289    | -86.4981   | 606184.7576 | -4.0246   |
| -4.0265       |             |            |             |           |
| [3881]ENERGY: | 840000      | 3226.7039  | 5402.7689   | 5728.4437 |
| 319.9525      | -14006.9618 | -1652.0100 | 0.0000      | 0.0000    |
| 7824.3048     | 6843.2021   | 298.3195   | -981.1028   | 6907.4383 |
| 299.0259      | 97.4687     | -8.4565    | 597684.2275 | -0.5867   |
| -0.5841       |             |            |             |           |
| [3931]ENERGY: | 850000      | 3279.1309  | 5406.3615   | 5701.5200 |
| 336.0104      | -13999.5694 | -1762.6223 | 0.0000      | 0.0000    |
| 7905.6138     | 6866.4449   | 301.4195   | -1039.1689  | 6932.2042 |
| 299.9421      | -252.2892   | -176.3382  | 584424.3981 | -1.4104   |
| -1.3483       |             |            |             |           |
| [3967]ENERGY: | 860000      | 3212.1434  | 5454.0055   | 5693.1302 |
| 311.3594      | -14034.4729 | -1695.2572 | 0.0000      | 0.0000    |
| 7910.5776     | 6851.4860   | 301.6088   | -1059.0916  | 6916.6576 |
| 300.8483      | 107.1295    | 69.6068    | 580673.4491 | -2.1506   |
| -2.1768       |             |            |             |           |
| [4017]ENERGY: | 870000      | 3189.6716  | 5389.1667   | 5640.2651 |
| 331.7346      | -14057.0513 | -1714.7529 | 0.0000      | 0.0000    |
| 7786.5456     | 6565.5794   | 296.8798   | -1220.9662  | 6632.5225 |
| 299.2433      | -133.9249   | -161.6964  | 559853.5206 | 1.2363    |
| 1.2608        |             |            |             |           |
| [4053]ENERGY: | 880000      | 3260.9378  | 5417.3891   | 5642.7908 |
| 318.7754      | -13984.8006 | -1705.7354 | 0.0000      | 0.0000    |
| 7837.9497     | 6787.3068   | 298.8397   | -1050.6429  | 6852.3929 |
| 297.3539      | -120.8846   | -60.5289   | 567294.4042 | -0.0543   |



Supplementary Text 6

-0.0592  
 [4103]ENERGY: 890000 3275.4669 5362.1317 5642.0377  
 349.1689 -13979.3511 -1687.3731 0.0000 0.0000  
 7710.8590 6672.9400 293.9941 -1037.9190 6732.8473  
 298.1196 -88.0577 -98.6335 593166.0846 1.5359  
 1.5132  
 [4142]ENERGY: 900000 3340.1615 5290.1428 5649.2525  
 338.3317 -13980.4817 -1720.5052 0.0000 0.0000  
 7863.3335 6780.2351 299.8075 -1083.0984 6844.5363  
 298.2437 -6.2099 7.1920 621066.2771 0.5049  
 0.5225  
 [4192]ENERGY: 910000 3203.5313 5383.3922 5650.5137  
 308.8976 -14055.0337 -1720.0620 0.0000 0.0000  
 7759.1776 6530.4167 295.8363 -1228.7609 6596.1768  
 298.4935 227.4135 74.9976 626611.0917 8.8564  
 8.8623  
 [4228]ENERGY: 920000 3176.9391 5333.3923 5679.5058  
 329.1833 -13999.8382 -1697.3261 0.0000 0.0000  
 7724.0272 6545.8836 294.4961 -1178.1437 6608.2253  
 297.0285 209.6455 67.2341 648813.0554 4.5145  
 4.5288  
 [4278]ENERGY: 930000 3267.6177 5341.8617 5729.4090  
 312.4129 -14047.2215 -1738.9713 0.0000 0.0000  
 7803.3099 6668.4183 297.5190 -1134.8916 6731.4620  
 296.4609 25.7245 165.6629 649171.0619 -3.3962  
 -3.3851  
 [4314]ENERGY: 940000 3237.6544 5388.2327 5702.7501  
 335.2091 -14044.4042 -1697.8784 0.0000 0.0000  
 7767.1117 6688.6755 296.1388 -1078.4362 6747.5136  
 297.4293 12.4632 -10.2105 679527.1381 1.7844  
 1.7969  
 [4364]ENERGY: 950000 3238.1719 5412.7025 5716.2576  
 336.5048 -14084.7956 -1674.5447 0.0000 0.0000  
 7867.7278 6812.0244 299.9751 -1055.7034 6876.2287  
 297.6650 79.4139 93.8653 699268.9735 0.2295  
 0.2477  
 [4400]ENERGY: 960000 3189.2775 5424.4183 5669.0132  
 334.9287 -14065.6018 -1725.4981 0.0000 0.0000  
 7820.0239 6646.5617 298.1562 -1173.4622 6709.9534  
 298.7645 -3.3488 -82.8217 699368.1179 0.4565  
 0.4540  
 [4450]ENERGY: 970000 3244.5325 5369.0285 5729.5760  
 337.1085 -14200.5800 -1646.8741 0.0000 0.0000  
 7838.8022 6671.5937 298.8722 -1167.2085 6733.9812  
 298.0225 136.0881 93.0758 678882.1484 3.4071  
 3.3918  
 [4486]ENERGY: 980000 3182.2751 5350.1287 5705.9557  
 318.2984 -14082.5612 -1754.8582 0.0000 0.0000  
 7940.6109 6659.8494 302.7539 -1280.7615 6728.0708  
 296.9105 51.2341 0.7363 663954.5152 -3.6318  
 -3.6273  
 [4536]ENERGY: 990000 3304.8242 5336.1974 5706.8806  
 309.3838 -13991.1156 -1712.9476 0.0000 0.0000  
 7834.5683 6787.7911 298.7108 -1046.7772 6850.0224

## Supplementary Text 6

|                       |             |             |             |           |
|-----------------------|-------------|-------------|-------------|-----------|
| 297.1302              | -58.7813    | -14.2871    | 678044.6499 | 0.1673    |
| 0.1879                |             |             |             |           |
| [4575]ENERGY: 1000000 | 3312.1413   | 5316.0854   | 5680.2132   |           |
| 346.7949              | -14044.9965 | -1740.1730  | 0.0000      | 0.0000    |
| 7781.5025             | 6651.5677   | 296.6875    | -1129.9348  | 6718.3571 |
| 299.5392              | -63.5255    | -44.1165    | 680285.8938 | -0.3585   |
| -0.3588               |             |             |             |           |
| [268]ENERGY: 1010000  | 3272.9194   | 5382.7451   | 5684.1767   | 343.9548  |
| -14046.7669           | -1766.1922  | 0.0000      | 0.0000      | 7778.7189 |
| 6649.5557             | 296.6151    | -1129.1632  | 6715.6748   | 297.5243  |
| 129.2834              | 19.8355     | 680285.8938 | 1.1530      | 1.1379    |
| [307]ENERGY: 1020000  | 3225.6458   | 5337.2926   | 5702.9259   | 319.2071  |
| -13981.5448           | -1697.2839  | 0.0000      | 0.0000      | 7748.5471 |
| 6654.7898             | 295.4646    | -1093.7573  | 6715.8053   | 297.6042  |
| 108.5357              | 53.6129     | 680285.8938 | -2.3898     | -2.3891   |
| [359]ENERGY: 1030000  | 3227.7852   | 5279.6463   | 5730.1135   | 343.0516  |
| -14042.5697           | -1696.8883  | 0.0000      | 0.0000      | 7808.3973 |
| 6649.5358             | 297.7468    | -1158.8615  | 6715.1163   | 297.5940  |
| -71.3604              | -33.7209    | 680285.8938 | 1.2778      | 1.2860    |
| [397]ENERGY: 1040000  | 3264.3479   | 5358.0692   | 5713.7550   | 356.0034  |
| -14042.4322           | -1705.8477  | 0.0000      | 0.0000      | 7712.0329 |
| 6655.9284             | 294.0722    | -1056.1045  | 6716.3438   | 297.4642  |
| -154.4198             | -135.8219   | 680285.8938 | 0.1889      | 0.1875    |
| [449]ENERGY: 1050000  | 3198.4383   | 5430.8157   | 5652.4053   | 330.0917  |
| -13988.2129           | -1755.0251  | 0.0000      | 0.0000      | 7785.2945 |
| 6653.8074             | 296.8658    | -1131.4870  | 6716.2917   | 297.4187  |
| 48.8103               | -12.4780    | 680285.8938 | -1.7985     | -1.8090   |
| [487]ENERGY: 1060000  | 3265.9425   | 5347.3148   | 5687.5245   | 330.3672  |
| -14001.6926           | -1700.0647  | 0.0000      | 0.0000      | 7723.4438 |
| 6652.8355             | 294.5074    | -1070.6082  | 6717.5677   | 297.4894  |
| 99.2200               | 125.0836    | 680285.8938 | 0.6468      | 0.6603    |
| [538]ENERGY: 1070000  | 3270.3471   | 5422.0737   | 5654.1689   | 310.7094  |
| -14119.8430           | -1633.9929  | 0.0000      | 0.0000      | 7750.2552 |
| 6653.7185             | 295.5297    | -1096.5368  | 6717.5067   | 297.5562  |
| 87.8024               | 167.9633    | 680285.8938 | 0.6554      | 0.6678    |
| [575]ENERGY: 1080000  | 3139.5932   | 5364.2400   | 5639.2814   | 322.5109  |
| -14093.8709           | -1672.9380  | 0.0000      | 0.0000      | 7952.4779 |
| 6651.2944             | 303.2408    | -1301.1835  | 6716.5509   | 297.6607  |
| 178.0171              | 146.3261    | 680285.8938 | -0.9001     | -0.9209   |
| [626]ENERGY: 1090000  | 3272.2008   | 5344.9419   | 5660.1477   | 337.6950  |
| -13975.8920           | -1752.7699  | 0.0000      | 0.0000      | 7770.3281 |
| 6656.6517             | 296.2951    | -1113.6764  | 6717.3922   | 297.7352  |
| -75.5723              | -20.3781    | 680285.8938 | -0.4792     | -0.4781   |
| [666]ENERGY: 1100000  | 3157.2030   | 5368.1728   | 5692.8733   | 315.1590  |
| -14037.1312           | -1649.6861  | 0.0000      | 0.0000      | 7805.2263 |
| 6651.8171             | 297.6259    | -1153.4092  | 6716.5854   | 297.7141  |
| 119.1789              | 77.4351     | 680285.8938 | 1.5141      | 1.5057    |
| [717]ENERGY: 1110000  | 3249.4776   | 5306.7149   | 5749.3735   | 350.4405  |
| -14052.2199           | -1722.5757  | 0.0000      | 0.0000      | 7772.7098 |
| 6653.9207             | 296.3860    | -1118.7892  | 6717.5524   | 297.9462  |
| -31.3451              | -9.6658     | 680285.8938 | 0.4761      | 0.4755    |
| [753]ENERGY: 1120000  | 3200.7451   | 5404.2183   | 5653.2680   | 332.9931  |
| -14096.6629           | -1703.0657  | 0.0000      | 0.0000      | 7861.7895 |
| 6653.2854             | 299.7827    | -1208.5041  | 6717.0625   | 298.0004  |

Supplementary Text 6

|               |             |             |             |             |           |
|---------------|-------------|-------------|-------------|-------------|-----------|
|               | 91.2148     | 95.8344     | 680285.8938 | 0.5893      | 0.6025    |
| [803]ENERGY:  | 1130000     | 3173.0303   | 5393.2928   | 5655.8264   | 316.1367  |
|               | -14123.6718 | -1679.4207  | 0.0000      | 0.0000      | 7917.6024 |
|               | 6652.7961   | 301.9109    | -1264.8063  | 6717.2028   | 297.9790  |
|               | 125.6450    | 127.0497    | 680285.8938 | -0.9608     | -0.9555   |
| [839]ENERGY:  | 1140000     | 3185.5060   | 5265.3488   | 5719.5400   | 333.5665  |
|               | -13952.5284 | -1751.2525  | 0.0000      | 0.0000      | 7853.4098 |
|               | 6653.5902   | 299.4632    | -1199.8196  | 6716.8233   | 297.9872  |
|               | 34.4170     | -41.1491    | 680285.8938 | 0.7487      | 0.7441    |
| [889]ENERGY:  | 1150000     | 3250.1318   | 5349.8187   | 5728.7503   | 319.3475  |
|               | -14104.2608 | -1676.8769  | 0.0000      | 0.0000      | 7787.3584 |
|               | 6654.2690   | 296.9445    | -1133.0894  | 6715.9176   | 297.9400  |
|               | 0.7192      | -4.4171     | 680285.8938 | 0.3747      | 0.3782    |
| [925]ENERGY:  | 1160000     | 3233.2499   | 5385.9394   | 5726.5583   | 332.4843  |
|               | -14146.8756 | -1684.0720  | 0.0000      | 0.0000      | 7805.6790 |
|               | 6652.9632   | 297.6431    | -1152.7158  | 6718.0922   | 297.8930  |
|               | 75.3928     | 13.8103     | 680285.8938 | -1.6426     | -1.6436   |
| [975]ENERGY:  | 1170000     | 3178.8957   | 5444.4943   | 5721.6181   | 351.0226  |
|               | -14123.3254 | -1723.2718  | 0.0000      | 0.0000      | 7801.7888 |
|               | 6651.2223   | 297.4948    | -1150.5665  | 6717.5592   | 297.8618  |
|               | 20.2473     | -13.1399    | 680285.8938 | 0.5170      | 0.5259    |
| [1011]ENERGY: | 1180000     | 3155.4534   | 5430.0743   | 5696.9581   |           |
|               | 327.8736    | -14025.7471 | -1725.7938  | 0.0000      | 0.0000    |
|               | 7795.6722   | 6654.4907   | 297.2616    | -1141.1815  | 6718.5976 |
|               | 297.7763    | 90.6659     | 82.0859     | 680285.8938 | -0.8084   |
|               | -0.8085     |             |             |             |           |
| [1061]ENERGY: | 1190000     | 3264.4363   | 5330.7345   | 5700.3991   |           |
|               | 335.4259    | -14129.2425 | -1713.7638  | 0.0000      | 0.0000    |
|               | 7865.2361   | 6653.2256   | 299.9141    | -1212.0105  | 6717.7648 |
|               | 297.8318    | 110.7022    | -12.7245    | 680285.8938 | 0.7213    |
|               | 0.7032      |             |             |             |           |
| [1100]ENERGY: | 1200000     | 3262.6017   | 5377.0471   | 5686.3092   |           |
|               | 328.4500    | -14006.2403 | -1784.9086  | 0.0000      | 0.0000    |
|               | 7788.1997   | 6651.4588   | 296.9766    | -1136.7409  | 6718.6561 |
|               | 298.0358    | 112.4585    | 11.6492     | 680285.8938 | 0.3544    |
|               | 0.3732      |             |             |             |           |
| [1150]ENERGY: | 1210000     | 3229.6409   | 5349.4887   | 5706.7094   |           |
|               | 334.4625    | -14084.2662 | -1742.0762  | 0.0000      | 0.0000    |
|               | 7858.6627   | 6652.6220   | 299.6635    | -1206.0408  | 6717.8006 |
|               | 298.0213    | -109.3712   | 3.5023      | 680285.8938 | -0.8718   |
|               | -0.8799     |             |             |             |           |
| [1186]ENERGY: | 1220000     | 3171.7044   | 5457.2234   | 5680.3139   |           |
|               | 338.5091    | -14097.1335 | -1742.0490  | 0.0000      | 0.0000    |
|               | 7846.5842   | 6655.1525   | 299.2029    | -1191.4317  | 6718.6998 |
|               | 298.1310    | 52.5628     | -29.5889    | 680285.8938 | 2.1164    |
|               | 2.1092      |             |             |             |           |
| [1236]ENERGY: | 1230000     | 3111.1770   | 5478.2201   | 5724.8969   |           |
|               | 314.8995    | -14113.0225 | -1707.0100  | 0.0000      | 0.0000    |
|               | 7847.5708   | 6656.7317   | 299.2405    | -1190.8391  | 6719.0038 |
|               | 298.0902    | 172.0253    | 94.1982     | 680285.8938 | -1.2035   |
|               | -1.2026     |             |             |             |           |
| [1272]ENERGY: | 1240000     | 3181.9996   | 5453.8594   | 5708.7953   |           |
|               | 347.2111    | -14153.4735 | -1755.2922  | 0.0000      | 0.0000    |
|               | 7869.8871   | 6652.9867   | 300.0915    | -1216.9003  | 6719.2916 |

Supplementary Text 6

|                       |             |            |             |           |
|-----------------------|-------------|------------|-------------|-----------|
| 297.9452              | 57.1392     | -27.9507   | 680285.8938 | 0.1265    |
| 0.1208                |             |            |             |           |
| [1322]ENERGY: 1250000 | 3232.7986   | 5415.8146  | 5698.3256   |           |
| 307.9360              | -14030.6693 | -1700.6700 | 0.0000      | 0.0000    |
| 7733.5610             | 6657.0965   | 294.8932   | -1076.4645  | 6718.5760 |
| 297.9616              | 119.3616    | 176.8703   | 680285.8938 | -0.5198   |
| -0.5168               |             |            |             |           |
| [1358]ENERGY: 1260000 | 3243.4574   | 5495.5760  | 5718.7860   |           |
| 331.0663              | -14120.2862 | -1781.0650 | 0.0000      | 0.0000    |
| 7769.7663             | 6657.3008   | 296.2737   | -1112.4655  | 6719.8572 |
| 298.0534              | 37.2449     | 27.9544    | 680285.8938 | -0.8107   |
| -0.8095               |             |            |             |           |
| [1408]ENERGY: 1270000 | 3126.9500   | 5391.7811  | 5707.6534   |           |
| 331.1525              | -14025.6078 | -1720.4985 | 0.0000      | 0.0000    |
| 7842.4336             | 6653.8643   | 299.0446   | -1188.5694  | 6718.8750 |
| 298.2713              | 60.9287     | 131.5401   | 680285.8938 | 1.9194    |
| 1.9278                |             |            |             |           |
| [1444]ENERGY: 1280000 | 3263.7516   | 5326.2988  | 5690.3423   |           |
| 304.2728              | -14026.6150 | -1683.2816 | 0.0000      | 0.0000    |
| 7781.7092             | 6656.4781   | 296.7291   | -1125.2310  | 6718.4387 |
| 298.0905              | 30.7290     | 2.0084     | 680285.8938 | -1.2752   |
| -1.2737               |             |            |             |           |
| [1494]ENERGY: 1290000 | 3159.4293   | 5457.3482  | 5625.9533   |           |
| 322.2337              | -14087.9028 | -1725.0028 | 0.0000      | 0.0000    |
| 7901.8306             | 6653.8895   | 301.3095   | -1247.9412  | 6719.2240 |
| 298.4214              | 5.0555      | 16.8925    | 680285.8938 | 1.2377    |
| 1.2482                |             |            |             |           |
| [1533]ENERGY: 1300000 | 3184.7104   | 5336.4634  | 5729.1061   |           |
| 333.9880              | -14128.3741 | -1705.4085 | 0.0000      | 0.0000    |
| 7899.7715             | 6650.2567   | 301.2310   | -1249.5148  | 6718.5802 |
| 298.3255              | 93.0867     | 95.0853    | 680285.8938 | 0.0058    |
| -0.0019               |             |            |             |           |
| [1583]ENERGY: 1310000 | 3151.4056   | 5314.3040  | 5726.2109   |           |
| 340.0689              | -14000.2724 | -1726.2687 | 0.0000      | 0.0000    |
| 7850.6782             | 6656.1265   | 299.3590   | -1194.5517  | 6717.9500 |
| 298.5389              | -34.6349    | -28.3500   | 680285.8938 | 3.5540    |
| 3.5482                |             |            |             |           |
| [1619]ENERGY: 1320000 | 3184.0201   | 5461.4396  | 5732.4319   |           |
| 329.4166              | -14024.8567 | -1810.3901 | 0.0000      | 0.0000    |
| 7782.6233             | 6654.6847   | 296.7640   | -1127.9386  | 6720.0067 |
| 298.2954              | -17.6440    | -16.0420   | 680285.8938 | -4.0587   |
| -4.0504               |             |            |             |           |
| [1669]ENERGY: 1330000 | 3228.6925   | 5435.7260  | 5699.3010   |           |
| 331.0508              | -14055.6402 | -1769.3954 | 0.0000      | 0.0000    |
| 7789.2205             | 6658.9552   | 297.0155   | -1130.2653  | 6719.3163 |
| 298.5037              | -87.6665    | -129.5686  | 680285.8938 | -1.8661   |
| -1.8813               |             |            |             |           |
| [1705]ENERGY: 1340000 | 3204.9174   | 5359.8980  | 5668.7455   |           |
| 355.1809              | -14055.8973 | -1741.9910 | 0.0000      | 0.0000    |
| 7860.4833             | 6651.3367   | 299.7329   | -1209.1467  | 6718.8197 |
| 298.3613              | 51.5841     | 3.3051     | 680285.8938 | -2.7649   |
| -2.7671               |             |            |             |           |
| [1755]ENERGY: 1350000 | 3235.1891   | 5355.9872  | 5696.2845   |           |
| 339.2340              | -14077.4351 | -1699.5771 | 0.0000      | 0.0000    |

Supplementary Text 6

|                       |             |            |             |           |
|-----------------------|-------------|------------|-------------|-----------|
| 7807.5463             | 6657.2287   | 297.7143   | -1150.3175  | 6720.2006 |
| 298.4347              | -102.4258   | -31.2616   | 680285.8938 | -1.9035   |
| -1.8987               |             |            |             |           |
| [1791]ENERGY: 1360000 | 3278.0907   | 5336.7861  | 5719.0171   |           |
| 347.2500              | -14060.1488 | -1733.9438 | 0.0000      | 0.0000    |
| 7771.3945             | 6658.4458   | 296.3358   | -1112.9487  | 6720.7628 |
| 298.4039              | 67.8265     | 38.5037    | 680285.8938 | -4.2439   |
| -4.2412               |             |            |             |           |
| [1841]ENERGY: 1370000 | 3181.0407   | 5419.0970  | 5678.8982   |           |
| 331.5864              | -14007.0528 | -1787.4074 | 0.0000      | 0.0000    |
| 7841.1232             | 6657.2853   | 298.9947   | -1183.8379  | 6721.0731 |
| 298.3674              | 76.9093     | -17.1033   | 680285.8938 | 0.2562    |
| 0.2495                |             |            |             |           |
| [1877]ENERGY: 1380000 | 3237.2396   | 5389.0003  | 5678.6927   |           |
| 338.3095              | -14158.5928 | -1665.1685 | 0.0000      | 0.0000    |
| 7837.4980             | 6656.9788   | 298.8564   | -1180.5193  | 6720.2955 |
| 298.5453              | 129.7983    | 156.0896   | 680285.8938 | -2.8244   |
| -2.8139               |             |            |             |           |
| [1927]ENERGY: 1390000 | 3219.6624   | 5390.7906  | 5683.1418   |           |
| 321.3720              | -14126.9929 | -1678.2466 | 0.0000      | 0.0000    |
| 7844.7316             | 6654.4589   | 299.1323   | -1190.2728  | 6721.2555 |
| 298.7720              | -100.3024   | -56.5766   | 680285.8938 | 2.4049    |
| 2.4158                |             |            |             |           |
| [1966]ENERGY: 1400000 | 3242.0740   | 5365.6570  | 5695.2196   |           |
| 350.1132              | -13973.9807 | -1824.2084 | 0.0000      | 0.0000    |
| 7806.0778             | 6660.9525   | 297.6583   | -1145.1253  | 6722.2285 |
| 298.8128              | 34.5710     | -66.8621   | 680285.8938 | -2.3998   |
| -2.4173               |             |            |             |           |
| [2016]ENERGY: 1410000 | 3219.9297   | 5318.4600  | 5694.8403   |           |
| 337.1267              | -14050.6603 | -1712.4609 | 0.0000      | 0.0000    |
| 7853.1470             | 6660.3824   | 299.4532   | -1192.7646  | 6722.0194 |
| 298.4774              | -21.5795    | -37.9365   | 680285.8938 | -5.1040   |
| -5.0976               |             |            |             |           |
| [2052]ENERGY: 1420000 | 3247.8390   | 5365.6272  | 5700.9636   |           |
| 336.5113              | -14021.7761 | -1815.1006 | 0.0000      | 0.0000    |
| 7844.5019             | 6658.5664   | 299.1235   | -1185.9355  | 6721.2470 |
| 298.3864              | -117.2650   | -115.9506  | 680285.8938 | -1.2236   |
| -1.2250               |             |            |             |           |
| [2102]ENERGY: 1430000 | 3209.4104   | 5353.1185  | 5738.5737   |           |
| 325.8432              | -14056.8428 | -1735.2571 | 0.0000      | 0.0000    |
| 7822.3332             | 6657.1791   | 298.2782   | -1165.1541  | 6721.6857 |
| 298.4965              | 195.6906    | 121.3226   | 680285.8938 | 0.9124    |
| 0.9076                |             |            |             |           |
| [2138]ENERGY: 1440000 | 3274.7188   | 5411.9285  | 5636.5723   |           |
| 315.7109              | -14125.4494 | -1712.0451 | 0.0000      | 0.0000    |
| 7856.4913             | 6657.9273   | 299.5807   | -1198.5640  | 6720.5967 |
| 298.5528              | -151.3197   | -102.7445  | 680285.8938 | 0.1387    |
| 0.1341                |             |            |             |           |
| [2188]ENERGY: 1450000 | 3235.9586   | 5455.7832  | 5630.6644   |           |
| 349.6392              | -14090.1043 | -1702.5277 | 0.0000      | 0.0000    |
| 7777.1188             | 6656.5323   | 296.5541   | -1120.5865  | 6720.5580 |
| 298.5913              | -96.8896    | -92.8696   | 680285.8938 | -3.9159   |
| -3.9162               |             |            |             |           |
| [2224]ENERGY: 1460000 | 3307.5657   | 5350.4768  | 5705.7654   |           |

## Supplementary Text 6

|                       |             |            |             |           |
|-----------------------|-------------|------------|-------------|-----------|
| 316.7408              | -14074.2044 | -1761.9439 | 0.0000      | 0.0000    |
| 7815.5396             | 6659.9401   | 298.0191   | -1155.5995  | 6720.6927 |
| 298.5602              | -194.6656   | -137.2739  | 680285.8938 | -6.2237   |
| -6.2252               |             |            |             |           |
| [2274]ENERGY: 1470000 | 3149.7976   | 5440.9526  | 5683.3048   |           |
| 349.7944              | -14079.0967 | -1689.2982 | 0.0000      | 0.0000    |
| 7800.4869             | 6655.9414   | 297.4451   | -1144.5455  | 6719.8002 |
| 298.3144              | 163.0257    | 153.3641   | 680285.8938 | -10.4562  |
| -10.4536              |             |            |             |           |
| [2310]ENERGY: 1480000 | 3307.7754   | 5377.8788  | 5667.9661   |           |
| 346.2541              | -14056.7768 | -1755.1598 | 0.0000      | 0.0000    |
| 7771.2244             | 6659.1622   | 296.3293   | -1112.0622  | 6720.3756 |
| 298.3622              | -68.9212    | -99.0793   | 680285.8938 | -7.7330   |
| -7.7225               |             |            |             |           |
| [2360]ENERGY: 1490000 | 3143.9966   | 5405.6099  | 5695.6730   |           |
| 307.2975              | -14030.5143 | -1699.9191 | 0.0000      | 0.0000    |
| 7834.3902             | 6656.5338   | 298.7379   | -1177.8564  | 6719.5454 |
| 298.6241              | 44.1513     | 65.2632    | 680285.8938 | -11.3061  |
| -11.3014              |             |            |             |           |
| [2399]ENERGY: 1500000 | 3203.5238   | 5381.3578  | 5723.3110   |           |
| 317.3186              | -14031.1832 | -1775.3581 | 0.0000      | 0.0000    |
| 7837.7496             | 6656.7195   | 298.8660   | -1181.0301  | 6720.1326 |
| 298.5472              | 21.6190     | -32.6739   | 680285.8938 | -7.1648   |
| -7.1794               |             |            |             |           |
| [2449]ENERGY: 1510000 | 3227.2815   | 5364.1836  | 5666.6062   |           |
| 337.7421              | -14039.1096 | -1762.3200 | 0.0000      | 0.0000    |
| 7860.7217             | 6655.1055   | 299.7420   | -1205.6162  | 6720.4682 |
| 298.5137              | -140.8812   | -118.6625  | 680285.8938 | -5.7473   |
| -5.7380               |             |            |             |           |
| [2485]ENERGY: 1520000 | 3229.0267   | 5404.0746  | 5668.5595   |           |
| 367.4359              | -14040.9428 | -1752.1171 | 0.0000      | 0.0000    |
| 7780.2431             | 6656.2797   | 296.6732   | -1123.9633  | 6720.0121 |
| 298.5356              | 75.2863     | 30.9851    | 680285.8938 | -4.7564   |
| -4.7830               |             |            |             |           |
| [2535]ENERGY: 1530000 | 3305.4621   | 5316.5243  | 5636.5819   |           |
| 345.2985              | -14096.6948 | -1667.6648 | 0.0000      | 0.0000    |
| 7816.4050             | 6655.9120   | 298.0521   | -1160.4930  | 6719.5029 |
| 298.7543              | -2.9982     | 54.4168    | 680285.8938 | 0.0552    |
| 0.0913                |             |            |             |           |
| [2571]ENERGY: 1540000 | 3240.0718   | 5397.5934  | 5657.1666   |           |
| 316.5625              | -13989.5624 | -1785.8307 | 0.0000      | 0.0000    |
| 7821.8226             | 6657.8239   | 298.2587   | -1163.9987  | 6720.5811 |
| 298.7506              | -41.6706    | -106.3842  | 680285.8938 | -3.7482   |
| -3.7604               |             |            |             |           |
| [2621]ENERGY: 1550000 | 3242.1534   | 5314.5032  | 5648.4633   |           |
| 350.6408              | -14108.9993 | -1652.3752 | 0.0000      | 0.0000    |
| 7861.4925             | 6655.8788   | 299.7714   | -1205.6137  | 6719.7712 |
| 298.5133              | -42.3115    | -88.9053   | 680285.8938 | -4.1505   |
| -4.1526               |             |            |             |           |
| [2657]ENERGY: 1560000 | 3204.2024   | 5318.7822  | 5682.2310   |           |
| 309.6335              | -14047.9863 | -1614.4591 | 0.0000      | 0.0000    |
| 7806.3477             | 6658.7514   | 297.6686   | -1147.5962  | 6721.0773 |
| 298.7114              | 49.9454     | 64.9969    | 680285.8938 | -4.4147   |
| -4.4073               |             |            |             |           |

Supplementary Text 6

|                       |             |            |             |           |
|-----------------------|-------------|------------|-------------|-----------|
| [2707]ENERGY: 1570000 | 3204.4597   | 5334.3692  | 5677.2698   |           |
| 342.6491              | -14005.9196 | -1708.4749 | 0.0000      | 0.0000    |
| 7811.1304             | 6655.4838   | 297.8510   | -1155.6466  | 6721.3814 |
| 298.6115              | 80.0651     | 37.7484    | 680285.8938 | -4.8934   |
| -4.9152               |             |            |             |           |
| [2743]ENERGY: 1580000 | 3266.9969   | 5382.2789  | 5655.0797   |           |
| 313.6797              | -13993.7172 | -1771.0690 | 0.0000      | 0.0000    |
| 7807.6801             | 6660.9292   | 297.7194   | -1146.7509  | 6723.6721 |
| 298.7706              | -14.7879    | -66.4696   | 680285.8938 | -4.2297   |
| -4.2220               |             |            |             |           |
| [2793]ENERGY: 1590000 | 3245.5075   | 5441.4392  | 5642.2008   |           |
| 292.9615              | -14107.4808 | -1738.1365 | 0.0000      | 0.0000    |
| 7883.3143             | 6659.8060   | 300.6035   | -1223.5083  | 6722.6895 |
| 298.8344              | 67.7438     | -45.4253   | 680285.8938 | -4.1969   |
| -4.2073               |             |            |             |           |
| [2832]ENERGY: 1600000 | 3286.8643   | 5438.6772  | 5644.6476   |           |
| 319.8318              | -14059.7982 | -1729.5878 | 0.0000      | 0.0000    |
| 7760.3129             | 6660.9478   | 295.9132   | -1099.3651  | 6722.2379 |
| 298.7349              | -123.8304   | -87.8160   | 680285.8938 | -3.1877   |
| -3.1768               |             |            |             |           |
| [2882]ENERGY: 1610000 | 3230.0556   | 5362.3512  | 5654.0116   |           |
| 329.9583              | -14023.6671 | -1720.8318 | 0.0000      | 0.0000    |
| 7828.7092             | 6660.5872   | 298.5213   | -1168.1220  | 6723.2775 |
| 298.6633              | 33.6578     | -37.9116   | 680285.8938 | -5.7508   |
| -5.7472               |             |            |             |           |
| [2918]ENERGY: 1620000 | 3204.2328   | 5319.5739  | 5706.7613   |           |
| 341.4377              | -14015.6732 | -1750.5198 | 0.0000      | 0.0000    |
| 7854.3837             | 6660.1963   | 299.5003   | -1194.1874  | 6721.9594 |
| 298.6029              | 66.7141     | 63.7924    | 680285.8938 | -5.0492   |
| -5.0407               |             |            |             |           |
| [2968]ENERGY: 1630000 | 3270.1090   | 5386.7555  | 5685.3559   |           |
| 332.6955              | -14061.9630 | -1772.1086 | 0.0000      | 0.0000    |
| 7816.7750             | 6657.6194   | 298.0662   | -1159.1557  | 6722.0156 |
| 298.7846              | -70.6949    | -81.5343   | 680285.8938 | -9.0341   |
| -9.0463               |             |            |             |           |
| [3004]ENERGY: 1640000 | 3288.1767   | 5342.1590  | 5662.8377   |           |
| 316.9436              | -13995.0616 | -1747.5182 | 0.0000      | 0.0000    |
| 7793.9080             | 6661.4452   | 297.1943   | -1132.4628  | 6723.3359 |
| 298.7063              | 36.7019     | -39.7161   | 680285.8938 | -2.5277   |
| -2.5176               |             |            |             |           |
| [3054]ENERGY: 1650000 | 3204.2607   | 5403.6352  | 5672.2728   |           |
| 341.7004              | -14014.9860 | -1785.6422 | 0.0000      | 0.0000    |
| 7837.6548             | 6658.8957   | 298.8624   | -1178.7590  | 6722.9919 |
| 298.6206              | 11.6396     | -13.7768   | 680285.8938 | -3.4714   |
| -3.4742               |             |            |             |           |
| [3090]ENERGY: 1660000 | 3238.5695   | 5445.7180  | 5697.4600   |           |
| 312.4727              | -14060.9496 | -1711.8981 | 0.0000      | 0.0000    |
| 7739.6292             | 6661.0017   | 295.1245   | -1078.6275  | 6723.6606 |
| 298.7760              | 20.9102     | -33.0301   | 680285.8938 | -6.6590   |
| -6.6590               |             |            |             |           |
| [3140]ENERGY: 1670000 | 3282.4234   | 5432.5784  | 5663.0546   |           |
| 345.0452              | -14093.6496 | -1756.1975 | 0.0000      | 0.0000    |
| 7789.6513             | 6662.9058   | 297.0320   | -1126.7455  | 6724.8315 |
| 298.7487              | 5.0900      | -19.0726   | 680285.8938 | -4.8301   |

Supplementary Text 6

-4.8255  
 [3176]ENERGY: 1680000      3152.5679      5349.0778      5692.1905  
 321.7117      -14031.8564      -1712.1564      0.0000      0.0000  
 7885.9564      6657.4913      300.7042      -1228.4650      6723.1305  
 298.7993      128.4767      88.3500      680285.8938      -7.6567  
 -7.6702  
 [3226]ENERGY: 1690000      3219.7758      5394.1565      5674.3842  
 319.9615      -14123.0928      -1677.3530      0.0000      0.0000  
 7854.1436      6661.9756      299.4912      -1192.1679      6723.4050  
 298.9097      -35.6913      -1.6491      680285.8938      -3.9864  
 -3.9758  
 [3265]ENERGY: 1700000      3234.6306      5449.1678      5674.6235  
 313.4904      -14137.1672      -1705.9699      0.0000      0.0000  
 7830.5597      6659.3348      298.5919      -1171.2249      6723.4310  
 298.8473      110.8040      59.2748      680285.8938      -8.0678  
 -8.0773  
 [3315]ENERGY: 1710000      3254.8682      5303.7486      5654.1728  
 343.3185      -14025.2718      -1690.2664      0.0000      0.0000  
 7820.7506      6661.3206      298.2178      -1159.4300      6723.6282  
 298.7147      127.7638      74.0278      680285.8938      -5.3616  
 -5.3484  
 [3351]ENERGY: 1720000      3260.6702      5464.2595      5688.8971  
 356.8274      -14144.8853      -1675.3905      0.0000      0.0000  
 7711.1880      6661.5664      294.0400      -1049.6215      6723.3811  
 298.7409      -16.7144      -26.1026      680285.8938      -5.6650  
 -5.6955  
 [3401]ENERGY: 1730000      3223.3770      5371.1218      5657.7241  
 314.9728      -14065.8517      -1720.8632      0.0000      0.0000  
 7877.7396      6658.2204      300.3909      -1219.5192      6723.0973  
 298.7913      -16.8871      11.6973      680285.8938      -4.2750  
 -4.2586  
 [3437]ENERGY: 1740000      3202.3057      5444.4932      5686.2345  
 342.1213      -14104.5701      -1789.4851      0.0000      0.0000  
 7880.3729      6661.4723      300.4913      -1218.9006      6723.0504  
 298.9949      133.5127      83.6205      680285.8938      -5.9379  
 -5.9311  
 [3487]ENERGY: 1750000      3242.7503      5337.0821      5694.9427  
 310.2285      -14054.7132      -1760.3434      0.0000      0.0000  
 7888.6883      6658.6353      300.8084      -1230.0530      6722.6835  
 299.0250      29.7505      -63.0324      680285.8938      -2.9965  
 -2.9914  
 [3523]ENERGY: 1760000      3175.7301      5324.8581      5695.9168  
 343.7622      -14025.6514      -1746.7224      0.0000      0.0000  
 7892.1734      6660.0669      300.9413      -1232.1065      6723.8080  
 299.1259      -12.2112      -29.2171      680285.8938      -4.9016  
 -4.9187  
 [3573]ENERGY: 1770000      3244.1179      5342.2677      5684.7257  
 337.9630      -14036.7877      -1726.1755      0.0000      0.0000  
 7817.6451      6663.7562      298.0994      -1153.8889      6723.6765  
 299.1876      70.5337      55.3621      680285.8938      -3.5597  
 -3.5630  
 [3609]ENERGY: 1780000      3191.0110      5323.0023      5704.1804  
 330.0572      -13965.5588      -1820.0013      0.0000      0.0000  
 7898.1144      6660.8052      301.1678      -1237.3092      6724.1736



Supplementary Text 6

|                       |             |            |             |           |
|-----------------------|-------------|------------|-------------|-----------|
| 299.0766              | -81.0057    | -125.0687  | 680285.8938 | -10.3940  |
| -10.3971              |             |            |             |           |
| [3659]ENERGY: 1790000 | 3274.2704   | 5465.5437  | 5678.7780   |           |
| 335.3993              | -14148.0184 | -1796.3832 | 0.0000      | 0.0000    |
| 7847.9869             | 6657.5766   | 299.2564   | -1190.4103  | 6723.1944 |
| 299.5904              | -63.0025    | -80.3472   | 680285.8938 | -6.6740   |
| -6.6604               |             |            |             |           |
| [3698]ENERGY: 1800000 | 3279.4237   | 5373.8551  | 5720.1128   |           |
| 323.4563              | -14134.8300 | -1830.6924 | 0.0000      | 0.0000    |
| 7924.1845             | 6655.5100   | 302.1619   | -1268.6745  | 6723.1299 |
| 299.7654              | -169.9109   | -89.3253   | 680285.8938 | -15.8563  |
| -15.8448              |             |            |             |           |
| [3748]ENERGY: 1810000 | 3211.9109   | 5350.8998  | 5714.3072   |           |
| 337.2091              | -13996.7371 | -1896.1282 | 0.0000      | 0.0000    |
| 7939.6320             | 6661.0937   | 302.7510   | -1278.5383  | 6724.1192 |
| 299.8223              | 79.5972     | 36.1001    | 680285.8938 | -14.9961  |
| -15.0103              |             |            |             |           |
| [3784]ENERGY: 1820000 | 3236.8417   | 5365.5471  | 5710.1173   |           |
| 322.3250              | -14135.2086 | -1749.2013 | 0.0000      | 0.0000    |
| 7907.4788             | 6657.9001   | 301.5249   | -1249.5787  | 6722.3556 |
| 299.8948              | 139.4691    | 136.7510   | 680285.8938 | -23.4279  |
| -23.4177              |             |            |             |           |
| [3834]ENERGY: 1830000 | 3119.7272   | 5489.6424  | 5680.0391   |           |
| 338.1086              | -14106.5077 | -1762.7579 | 0.0000      | 0.0000    |
| 7900.2963             | 6658.5479   | 301.2510   | -1241.7484  | 6722.1946 |
| 299.9441              | 4.3040      | 8.9168     | 680285.8938 | -21.2221  |
| -21.2246              |             |            |             |           |
| [3870]ENERGY: 1840000 | 3194.4287   | 5349.2745  | 5710.3282   |           |
| 324.8113              | -14150.5626 | -1776.8380 | 0.0000      | 0.0000    |
| 8004.0395             | 6655.4816   | 305.2069   | -1348.5579  | 6722.7541 |
| 300.1176              | 67.8791     | 23.2774    | 680285.8938 | -19.0422  |
| -19.0604              |             |            |             |           |
| [3920]ENERGY: 1850000 | 3297.4440   | 5334.6040  | 5724.7694   |           |
| 341.0169              | -14147.5087 | -1764.2158 | 0.0000      | 0.0000    |
| 7872.3057             | 6658.4156   | 300.1837   | -1213.8901  | 6724.5912 |
| 300.1716              | 41.2460     | -7.7438    | 680285.8938 | -18.6442  |
| -18.6123              |             |            |             |           |
| [3956]ENERGY: 1860000 | 3279.0016   | 5314.9713  | 5715.9988   |           |
| 325.9160              | -14067.2940 | -1822.8014 | 0.0000      | 0.0000    |
| 7908.1646             | 6653.9569   | 301.5511   | -1254.2078  | 6722.1647 |
| 300.1101              | -3.7518     | -3.6357    | 680285.8938 | -18.7316  |
| -18.7499              |             |            |             |           |
| [4006]ENERGY: 1870000 | 3243.2908   | 5377.9316  | 5678.7447   |           |
| 348.7317              | -14137.1613 | -1765.3402 | 0.0000      | 0.0000    |
| 7912.9803             | 6659.1776   | 301.7347   | -1253.8027  | 6720.7203 |
| 299.9289              | -50.4015    | 6.0141     | 680285.8938 | -19.5620  |
| -19.5495              |             |            |             |           |
| [4042]ENERGY: 1880000 | 3223.9123   | 5401.0666  | 5720.2742   |           |
| 331.5384              | -14107.6517 | -1799.0564 | 0.0000      | 0.0000    |
| 7886.9988             | 6657.0823   | 300.7440   | -1229.9166  | 6722.7633 |
| 300.1205              | 107.5546    | 66.8510    | 680285.8938 | -20.5668  |
| -20.5826              |             |            |             |           |
| [4092]ENERGY: 1890000 | 3286.0278   | 5348.4262  | 5644.4122   |           |
| 321.1753              | -14107.0190 | -1729.5724 | 0.0000      | 0.0000    |

Supplementary Text 6

|                       |             |            |             |           |
|-----------------------|-------------|------------|-------------|-----------|
| 7893.4957             | 6656.9459   | 300.9917   | -1236.5498  | 6721.3232 |
| 300.0504              | 112.2919    | -3.6792    | 680285.8938 | -18.0090  |
| -18.0177              |             |            |             |           |
| [4131]ENERGY: 1900000 | 3223.2864   | 5407.5134  | 5660.5267   |           |
| 342.7023              | -14062.2548 | -1780.1749 | 0.0000      | 0.0000    |
| 7868.6011             | 6660.2003   | 300.0425   | -1208.4008  | 6722.5289 |
| 300.1416              | -32.3041    | 42.8455    | 680285.8938 | -18.4202  |
| -18.4002              |             |            |             |           |
| [4181]ENERGY: 1910000 | 3214.4906   | 5359.2186  | 5710.0440   |           |
| 340.0774              | -14109.6010 | -1734.4180 | 0.0000      | 0.0000    |
| 7879.6890             | 6659.5004   | 300.4652   | -1220.1886  | 6723.7451 |
| 300.3128              | 140.6522    | 55.7300    | 680285.8938 | -18.7200  |
| -18.7259              |             |            |             |           |
| [4217]ENERGY: 1920000 | 3224.5769   | 5379.3887  | 5713.3663   |           |
| 337.5569              | -14082.4941 | -1748.7789 | 0.0000      | 0.0000    |
| 7836.9614             | 6660.5773   | 298.8360   | -1176.3841  | 6723.8913 |
| 300.0920              | 157.2679    | 19.9261    | 680285.8938 | -16.5315  |
| -16.5519              |             |            |             |           |
| [4267]ENERGY: 1930000 | 3136.6912   | 5301.3810  | 5667.2122   |           |
| 365.6627              | -13986.7293 | -1767.1186 | 0.0000      | 0.0000    |
| 7943.0212             | 6660.1203   | 302.8802   | -1282.9009  | 6724.1069 |
| 300.0710              | 77.1344     | 44.7145    | 680285.8938 | -18.0556  |
| -18.0392              |             |            |             |           |
| [4303]ENERGY: 1940000 | 3198.8290   | 5345.6425  | 5662.0181   |           |
| 333.0184              | -14023.0798 | -1785.0433 | 0.0000      | 0.0000    |
| 7928.6643             | 6660.0491   | 302.3328   | -1268.6152  | 6723.9118 |
| 300.4163              | -40.7045    | -53.8174   | 680285.8938 | -19.2161  |
| -19.2186              |             |            |             |           |
| [4353]ENERGY: 1950000 | 3274.0497   | 5366.4059  | 5746.0938   |           |
| 328.7355              | -14209.6005 | -1695.3797 | 0.0000      | 0.0000    |
| 7847.9435             | 6658.2483   | 299.2547   | -1189.6952  | 6723.3653 |
| 300.4319              | -49.3843    | 72.4690    | 680285.8938 | -20.6453  |
| -20.6190              |             |            |             |           |
| [4389]ENERGY: 1960000 | 3207.3606   | 5369.7335  | 5676.7163   |           |
| 317.9893              | -14128.2320 | -1725.2846 | 0.0000      | 0.0000    |
| 7941.1081             | 6659.3911   | 302.8073   | -1281.7170  | 6723.6533 |
| 300.5053              | 102.8896    | 77.6187    | 680285.8938 | -20.4273  |
| -20.4458              |             |            |             |           |
| [4439]ENERGY: 1970000 | 3230.2311   | 5377.8639  | 5714.8963   |           |
| 333.3134              | -14232.0062 | -1675.8991 | 0.0000      | 0.0000    |
| 7910.7758             | 6659.1751   | 301.6506   | -1251.6007  | 6724.0092 |
| 300.4345              | 291.6387    | 254.6083   | 680285.8938 | -21.8200  |
| -21.8214              |             |            |             |           |
| [4475]ENERGY: 1980000 | 3270.7988   | 5420.8616  | 5695.8159   |           |
| 360.9722              | -14114.7858 | -1739.7167 | 0.0000      | 0.0000    |
| 7768.1852             | 6662.1312   | 296.2134   | -1106.0540  | 6724.0593 |
| 300.2664              | 139.8252    | 23.0120    | 680285.8938 | -22.2707  |
| -22.2597              |             |            |             |           |
| [4525]ENERGY: 1990000 | 3271.2176   | 5350.5374  | 5680.6534   |           |
| 337.1454              | -14092.7087 | -1748.1453 | 0.0000      | 0.0000    |
| 7862.0067             | 6660.7064   | 299.7910   | -1201.3003  | 6725.6752 |
| 300.3802              | 107.2367    | 55.7048    | 680285.8938 | -16.9065  |
| -16.9158              |             |            |             |           |
| [4564]ENERGY: 2000000 | 3247.4889   | 5381.3306  | 5685.0846   |           |

## Supplementary Text 6

|                       |             |            |             |           |
|-----------------------|-------------|------------|-------------|-----------|
| 349.2871              | -14041.5618 | -1825.6361 | 0.0000      | 0.0000    |
| 7865.9741             | 6661.9674   | 299.9423   | -1204.0067  | 6725.0738 |
| 300.3038              | 218.0084    | 99.7029    | 680285.8938 | -20.6777  |
| -20.6804              |             |            |             |           |
| [4614]ENERGY: 2010000 | 3211.5785   | 5380.5482  | 5595.4507   |           |
| 330.1805              | -13960.3042 | -1770.0753 | 0.0000      | 0.0000    |
| 7873.4962             | 6660.8746   | 300.2291   | -1212.6215  | 6725.4298 |
| 300.4311              | -33.2692    | -44.2933   | 680285.8938 | -16.9240  |
| -16.9135              |             |            |             |           |
| [4650]ENERGY: 2020000 | 3251.9348   | 5499.4491  | 5716.3003   |           |
| 323.5107              | -14215.3670 | -1741.7796 | 0.0000      | 0.0000    |
| 7829.6839             | 6663.7321   | 298.5585   | -1165.9518  | 6725.8350 |
| 300.1613              | -15.1371    | -10.3656   | 680285.8938 | -20.5973  |
| -20.5905              |             |            |             |           |
| [4700]ENERGY: 2030000 | 3312.8740   | 5359.0987  | 5653.3533   |           |
| 339.7776              | -14080.9756 | -1780.1399 | 0.0000      | 0.0000    |
| 7857.1086             | 6661.0968   | 299.6042   | -1196.0118  | 6724.6137 |
| 300.2000              | -71.6316    | -12.1017   | 680285.8938 | -19.7669  |
| -19.7871              |             |            |             |           |
| [4736]ENERGY: 2040000 | 3333.9502   | 5340.5488  | 5675.0027   |           |
| 337.6362              | -14082.9386 | -1793.7566 | 0.0000      | 0.0000    |
| 7856.3019             | 6666.7446   | 299.5735   | -1189.5573  | 6726.9604 |
| 300.5452              | -24.0334    | -22.2532   | 680285.8938 | -18.8646  |
| -18.8430              |             |            |             |           |
| [4786]ENERGY: 2050000 | 3199.9159   | 5407.9587  | 5651.8796   |           |
| 352.4624              | -14148.2631 | -1768.8544 | 0.0000      | 0.0000    |
| 7962.6520             | 6657.7511   | 303.6288   | -1304.9009  | 6726.6854 |
| 300.3719              | -96.6571    | -22.6618   | 680285.8938 | -18.1959  |
| -18.2048              |             |            |             |           |
| [4822]ENERGY: 2060000 | 3266.9979   | 5314.5992  | 5670.3217   |           |
| 341.1655              | -14066.9197 | -1736.4271 | 0.0000      | 0.0000    |
| 7871.3070             | 6661.0446   | 300.1456   | -1210.2624  | 6726.8195 |
| 300.4344              | 148.4265    | 79.6070    | 680285.8938 | -19.7112  |
| -19.7291              |             |            |             |           |
| [4872]ENERGY: 2070000 | 3231.0787   | 5435.9935  | 5735.4354   |           |
| 349.3257              | -14212.6144 | -1709.6021 | 0.0000      | 0.0000    |
| 7834.8573             | 6664.4741   | 298.7557   | -1170.3832  | 6726.7117 |
| 300.4412              | -7.8106     | -39.0289   | 680285.8938 | -22.4109  |
| -22.4137              |             |            |             |           |
| [4908]ENERGY: 2080000 | 3287.3535   | 5369.2006  | 5744.8161   |           |
| 340.3847              | -14164.3624 | -1807.5632 | 0.0000      | 0.0000    |
| 7891.4045             | 6661.2337   | 300.9120   | -1230.1708  | 6727.1052 |
| 300.3559              | -155.7066   | -158.0319  | 680285.8938 | -20.1161  |
| -20.1095              |             |            |             |           |
| [4958]ENERGY: 2090000 | 3286.8665   | 5407.5234  | 5712.1693   |           |
| 321.6727              | -14134.3038 | -1778.4286 | 0.0000      | 0.0000    |
| 7843.7186             | 6659.2182   | 299.0936   | -1184.5005  | 6726.3349 |
| 300.3637              | 99.1845     | 36.5597    | 680285.8938 | -16.4251  |
| -16.4297              |             |            |             |           |
| [4997]ENERGY: 2100000 | 3295.2573   | 5434.7082  | 5622.4432   |           |
| 325.8135              | -14130.0484 | -1835.3320 | 0.0000      | 0.0000    |
| 7946.9769             | 6659.8187   | 303.0310   | -1287.1582  | 6726.2906 |
| 300.4349              | -180.2000   | -202.4652  | 680285.8938 | -15.9110  |
| -15.9215              |             |            |             |           |

Supplementary Text 6

|                       |             |            |             |           |
|-----------------------|-------------|------------|-------------|-----------|
| [5047]ENERGY: 2110000 | 3256.2977   | 5392.3566  | 5665.7388   |           |
| 336.6709              | -14115.3663 | -1796.9079 | 0.0000      | 0.0000    |
| 7921.6550             | 6660.4447   | 302.0655   | -1261.2103  | 6724.1804 |
| 300.2692              | -91.0068    | -49.3878   | 680285.8938 | -16.2240  |
| -16.1992              |             |            |             |           |
| [5083]ENERGY: 2120000 | 3245.9678   | 5346.1293  | 5685.9485   |           |
| 345.3887              | -14099.7786 | -1769.6544 | 0.0000      | 0.0000    |
| 7908.6898             | 6662.6910   | 301.5711   | -1245.9987  | 6725.5013 |
| 300.3188              | 67.7701     | -74.5061   | 680285.8938 | -16.2074  |
| -16.2062              |             |            |             |           |
| [5133]ENERGY: 2130000 | 3237.2745   | 5421.3547  | 5726.4476   |           |
| 307.4984              | -14146.2491 | -1787.3731 | 0.0000      | 0.0000    |
| 7898.8595             | 6657.8127   | 301.1963   | -1241.0469  | 6726.2143 |
| 300.2167              | -34.6944    | -49.0825   | 680285.8938 | -20.4352  |
| -20.4622              |             |            |             |           |
| [5169]ENERGY: 2140000 | 3312.4072   | 5333.8108  | 5700.3755   |           |
| 354.8024              | -14159.1382 | -1751.5095 | 0.0000      | 0.0000    |
| 7870.9131             | 6661.6612   | 300.1306   | -1209.2518  | 6725.7240 |
| 300.2215              | 79.5936     | 76.0507    | 680285.8938 | -19.9603  |
| -19.9383              |             |            |             |           |
| [5219]ENERGY: 2150000 | 3244.8752   | 5437.2214  | 5723.8178   |           |
| 326.4441              | -14202.2139 | -1755.2083 | 0.0000      | 0.0000    |
| 7883.8023             | 6658.7385   | 300.6221   | -1225.0638  | 6725.5318 |
| 300.2641              | 87.8807     | 37.4327    | 680285.8938 | -21.1918  |
| -21.2116              |             |            |             |           |
| [5255]ENERGY: 2160000 | 3280.5560   | 5393.9261  | 5779.6627   |           |
| 330.2170              | -14247.6001 | -1746.5490 | 0.0000      | 0.0000    |
| 7872.3654             | 6662.5782   | 300.1860   | -1209.7873  | 6725.5086 |
| 300.1909              | 87.0566     | 24.0104    | 680285.8938 | -20.3519  |
| -20.3410              |             |            |             |           |
| [5305]ENERGY: 2170000 | 3213.2529   | 5380.9848  | 5735.7577   |           |
| 351.1335              | -14172.9287 | -1720.6711 | 0.0000      | 0.0000    |
| 7875.8588             | 6663.3879   | 300.3192   | -1212.4709  | 6725.6787 |
| 300.1236              | 74.5558     | 22.8191    | 680285.8938 | -19.7950  |
| -19.7845              |             |            |             |           |
| [5341]ENERGY: 2180000 | 3290.0552   | 5339.3048  | 5722.7020   |           |
| 316.4418              | -14113.4551 | -1800.6128 | 0.0000      | 0.0000    |
| 7907.0171             | 6661.4530   | 301.5073   | -1245.5641  | 6726.7994 |
| 300.2492              | -201.9225   | -141.1467  | 680285.8938 | -16.3116  |
| -16.2960              |             |            |             |           |
| [5391]ENERGY: 2190000 | 3254.4652   | 5415.3816  | 5674.9982   |           |
| 334.5786              | -14141.7790 | -1752.6506 | 0.0000      | 0.0000    |
| 7877.7673             | 6662.7612   | 300.3920   | -1215.0061  | 6725.5542 |
| 300.2024              | -82.2924    | -82.3068   | 680285.8938 | -17.6033  |
| -17.6011              |             |            |             |           |
| [5430]ENERGY: 2200000 | 3309.1996   | 5353.5560  | 5732.3161   |           |
| 314.4571              | -14058.4391 | -1771.7018 | 0.0000      | 0.0000    |
| 7787.3104             | 6666.6983   | 296.9427   | -1120.6121  | 6727.0939 |
| 300.1949              | 44.7297     | -41.7566   | 680285.8938 | -21.6440  |
| -21.6646              |             |            |             |           |
| [5480]ENERGY: 2210000 | 3184.9733   | 5420.1440  | 5734.9468   |           |
| 338.2878              | -14106.2295 | -1788.1757 | 0.0000      | 0.0000    |
| 7878.4199             | 6662.3666   | 300.4169   | -1216.0532  | 6725.9803 |
| 300.0975              | 60.3271     | -1.1196    | 680285.8938 | -24.5363  |

Supplementary Text 6

-24.5311  
 [5516]ENERGY: 2220000      3285.7263      5419.4494      5721.1701  
 355.5297      -14195.8571      -1717.8428      0.0000      0.0000  
 7794.6335      6662.8091      297.2219      -1131.8244      6726.0017  
 300.3139      6.8139      -68.3018      680285.8938      -26.7335  
 -26.7434  
 [5566]ENERGY: 2230000      3313.1119      5340.8504      5706.6694  
 333.4633      -14146.1084      -1751.7239      0.0000      0.0000  
 7865.4642      6661.7268      299.9228      -1203.7374      6726.1344  
 300.3739      -58.6294      -75.9070      680285.8938      -26.6698  
 -26.6676  
 [5602]ENERGY: 2240000      3346.3410      5332.6458      5683.9383  
 325.5625      -14100.0164      -1757.8012      0.0000      0.0000  
 7834.3846      6665.0545      298.7377      -1169.3301      6726.2266  
 300.2523      -78.5861      -80.5079      680285.8938      -25.3058  
 -25.3109  
 [5652]ENERGY: 2250000      3220.6067      5392.3310      5726.8194  
 321.3538      -14146.4340      -1752.0401      0.0000      0.0000  
 7900.3856      6663.0224      301.2544      -1237.3632      6727.3294  
 300.5993      -33.9564      -55.2354      680285.8938      -27.8941  
 -27.8902  
 [5688]ENERGY: 2260000      3311.5370      5406.8249      5693.0157  
 328.4548      -14160.2155      -1770.6550      0.0000      0.0000  
 7851.1896      6660.1515      299.3785      -1191.0380      6725.5411  
 300.5394      54.7898      21.3295      680285.8938      -23.1143  
 -23.1046  
 [5738]ENERGY: 2270000      3248.5546      5370.4252      5650.9116  
 335.4384      -14122.2295      -1760.5656      0.0000      0.0000  
 7939.2920      6661.8267      302.7380      -1277.4654      6726.5783  
 300.4178      -33.2783      -56.6541      680285.8938      -25.9346  
 -25.9388  
 [5774]ENERGY: 2280000      3213.1469      5369.3251      5665.5143  
 330.9136      -14157.9360      -1729.7822      0.0000      0.0000  
 7971.6727      6662.8543      303.9727      -1308.8183      6726.8897  
 300.4930      111.1400      8.3489      680285.8938      -24.9106  
 -24.9139  
 [5824]ENERGY: 2290000      3280.1869      5419.4505      5678.4074  
 317.1124      -14138.3522      -1803.9078      0.0000      0.0000  
 7910.5329      6663.4302      301.6414      -1247.1027      6728.1933  
 300.5835      111.3678      99.5131      680285.8938      -29.3395  
 -29.3335  
 [5863]ENERGY: 2300000      3163.7890      5454.9649      5692.2311  
 324.1418      -14065.3707      -1772.9635      0.0000      0.0000  
 7866.6302      6663.4228      299.9673      -1203.2073      6727.4431  
 300.6081      100.4771      45.5867      680285.8938      -27.5126  
 -27.5190  
 [5913]ENERGY: 2310000      3321.8926      5360.4496      5678.3858  
 328.2197      -14060.0655      -1735.8031      0.0000      0.0000  
 7773.8157      6666.8950      296.4281      -1106.9207      6727.3234  
 300.5085      -107.8365      -38.4268      680285.8938      -24.7102  
 -24.6921  
 [5949]ENERGY: 2320000      3291.5437      5383.9553      5636.9210  
 325.6881      -14149.7988      -1756.0291      0.0000      0.0000  
 7930.9435      6663.2237      302.4197      -1267.7199      6726.6558

Supplementary Text 6

|                       |             |            |             |           |
|-----------------------|-------------|------------|-------------|-----------|
| 300.4573              | -136.2576   | -159.1405  | 680285.8938 | -23.8850  |
| -23.8847              |             |            |             |           |
| [5999]ENERGY: 2330000 | 3157.4016   | 5429.0671  | 5674.9908   |           |
| 333.0222              | -14091.5200 | -1847.8456 | 0.0000      | 0.0000    |
| 8004.6340             | 6659.7500   | 305.2296   | -1344.8839  | 6726.6789 |
| 300.5291              | 14.9713     | 70.1100    | 680285.8938 | -27.0161  |
| -27.0241              |             |            |             |           |
| [6035]ENERGY: 2340000 | 3229.3055   | 5445.6528  | 5720.1769   |           |
| 335.1174              | -14157.2923 | -1787.8321 | 0.0000      | 0.0000    |
| 7877.0411             | 6662.1694   | 300.3643   | -1214.8717  | 6726.2975 |
| 300.6368              | 15.3042     | -1.3168    | 680285.8938 | -23.5962  |
| -23.6044              |             |            |             |           |
| [6085]ENERGY: 2350000 | 3233.9432   | 5486.9297  | 5688.2738   |           |
| 334.7811              | -14162.6944 | -1839.8046 | 0.0000      | 0.0000    |
| 7919.8751             | 6661.3040   | 301.9976   | -1258.5712  | 6727.6945 |
| 300.7292              | -23.9389    | -66.5680   | 680285.8938 | -29.2515  |
| -29.2530              |             |            |             |           |
| [6121]ENERGY: 2360000 | 3231.9233   | 5434.0179  | 5695.3544   |           |
| 329.0870              | -14197.0090 | -1708.9888 | 0.0000      | 0.0000    |
| 7881.4779             | 6665.8628   | 300.5335   | -1215.6150  | 6728.7376 |
| 300.6887              | 84.2930     | 31.1557    | 680285.8938 | -20.2826  |
| -20.2773              |             |            |             |           |
| [6171]ENERGY: 2370000 | 3258.7103   | 5328.3649  | 5710.4721   |           |
| 333.3461              | -14115.4754 | -1758.5032 | 0.0000      | 0.0000    |
| 7905.3858             | 6662.3007   | 301.4451   | -1243.0851  | 6727.8094 |
| 300.7559              | -89.2130    | -29.3044   | 680285.8938 | -30.6053  |
| -30.6097              |             |            |             |           |
| [6207]ENERGY: 2380000 | 3233.7200   | 5428.4465  | 5662.5125   |           |
| 321.8327              | -14092.4532 | -1753.4218 | 0.0000      | 0.0000    |
| 7864.2624             | 6664.8991   | 299.8770   | -1199.3633  | 6727.7042 |
| 300.7681              | 91.6291     | 24.5316    | 680285.8938 | -24.1549  |
| -24.1712              |             |            |             |           |
| [6257]ENERGY: 2390000 | 3242.9300   | 5334.1238  | 5678.9466   |           |
| 335.3573              | -14090.6419 | -1761.4253 | 0.0000      | 0.0000    |
| 7923.2697             | 6662.5602   | 302.1271   | -1260.7096  | 6728.1838 |
| 300.7379              | 52.5610     | -27.1962   | 680285.8938 | -23.3884  |
| -23.3762              |             |            |             |           |
| [6296]ENERGY: 2400000 | 3221.3991   | 5477.5546  | 5667.5504   |           |
| 327.0907              | -14104.4791 | -1829.8880 | 0.0000      | 0.0000    |
| 7907.0527             | 6666.2803   | 301.5087   | -1240.7724  | 6728.5927 |
| 300.6180              | 11.2951     | 36.8624    | 680285.8938 | -23.1770  |
| -23.1696              |             |            |             |           |
| [6346]ENERGY: 2410000 | 3301.4173   | 5399.6543  | 5685.2995   |           |
| 336.0158              | -14111.1449 | -1731.1129 | 0.0000      | 0.0000    |
| 7787.5759             | 6667.7050   | 296.9528   | -1119.8710  | 6728.8834 |
| 300.4726              | 65.0396     | 26.7128    | 680285.8938 | -26.4799  |
| -26.4864              |             |            |             |           |
| [6382]ENERGY: 2420000 | 3188.4490   | 5475.4085  | 5718.0266   |           |
| 337.5680              | -14180.9188 | -1725.6077 | 0.0000      | 0.0000    |
| 7854.9958             | 6667.9215   | 299.5237   | -1187.0743  | 6730.0271 |
| 300.7202              | 177.2840    | 54.1968    | 680285.8938 | -23.1808  |
| -23.1808              |             |            |             |           |
| [6432]ENERGY: 2430000 | 3236.9445   | 5366.1959  | 5744.8600   |           |
| 322.0956              | -14143.7501 | -1754.6075 | 0.0000      | 0.0000    |

Supplementary Text 6

|                       |             |            |             |           |
|-----------------------|-------------|------------|-------------|-----------|
| 7895.6621             | 6667.4006   | 301.0743   | -1228.2616  | 6730.0034 |
| 300.8953              | 279.5538    | 206.7533   | 680285.8938 | -24.7229  |
| -24.7258              |             |            |             |           |
| [6468]ENERGY: 2440000 | 3305.5937   | 5479.4365  | 5655.7209   |           |
| 327.0423              | -14131.4654 | -1798.1745 | 0.0000      | 0.0000    |
| 7828.6603             | 6666.8140   | 298.5194   | -1161.8463  | 6729.8461 |
| 300.9059              | -166.6567   | -144.8705  | 680285.8938 | -24.1808  |
| -24.1586              |             |            |             |           |
| [6518]ENERGY: 2450000 | 3279.3936   | 5299.0034  | 5669.5526   |           |
| 329.0265              | -14101.8725 | -1691.3831 | 0.0000      | 0.0000    |
| 7882.6025             | 6666.3228   | 300.5763   | -1216.2797  | 6728.9423 |
| 300.9094              | -7.5830     | 32.0958    | 680285.8938 | -19.1104  |
| -19.1215              |             |            |             |           |
| [6554]ENERGY: 2460000 | 3209.5741   | 5290.8751  | 5681.8238   |           |
| 313.5956              | -14044.4580 | -1755.3734 | 0.0000      | 0.0000    |
| 7967.0501             | 6663.0872   | 303.7965   | -1303.9629  | 6729.6623 |
| 301.1327              | 75.9021     | 42.0056    | 680285.8938 | -21.3471  |
| -21.3593              |             |            |             |           |
| [6604]ENERGY: 2470000 | 3292.0190   | 5497.6076  | 5704.0393   |           |
| 340.0591              | -14205.1535 | -1753.1257 | 0.0000      | 0.0000    |
| 7791.4109             | 6666.8566   | 297.0991   | -1124.5543  | 6730.6265 |
| 300.8863              | -24.0856    | -41.6303   | 680285.8938 | -18.2816  |
| -18.2699              |             |            |             |           |
| [6640]ENERGY: 2480000 | 3223.3250   | 5341.0459  | 5672.9680   |           |
| 332.5084              | -14143.1131 | -1743.3598 | 0.0000      | 0.0000    |
| 7977.1738             | 6660.5482   | 304.1825   | -1316.6256  | 6729.9036 |
| 300.7860              | 10.6651     | -23.9131   | 680285.8938 | -22.4628  |
| -22.4667              |             |            |             |           |
| [6690]ENERGY: 2490000 | 3230.7824   | 5331.7656  | 5725.8539   |           |
| 334.5818              | -14121.1784 | -1731.0535 | 0.0000      | 0.0000    |
| 7893.6086             | 6664.3604   | 300.9960   | -1229.2482  | 6730.4183 |
| 300.9503              | 31.2781     | -21.0698   | 680285.8938 | -17.6746  |
| -17.6626              |             |            |             |           |
| [6729]ENERGY: 2500000 | 3289.1030   | 5368.9118  | 5722.5283   |           |
| 312.9915              | -14132.4633 | -1820.9980 | 0.0000      | 0.0000    |
| 7923.9914             | 6664.0646   | 302.1546   | -1259.9268  | 6730.1022 |
| 300.8109              | -91.8866    | -139.4196  | 680285.8938 | -27.2209  |
| -27.2401              |             |            |             |           |
| [6779]ENERGY: 2510000 | 3262.1350   | 5239.6396  | 5719.4457   |           |
| 330.3285              | -14095.5048 | -1673.2707 | 0.0000      | 0.0000    |
| 7881.4194             | 6664.1926   | 300.5312   | -1217.2268  | 6729.6491 |
| 300.9045              | 80.9287     | -6.4844    | 680285.8938 | -25.0545  |
| -25.0537              |             |            |             |           |
| [6815]ENERGY: 2520000 | 3235.6704   | 5347.1669  | 5688.0420   |           |
| 309.7628              | -14179.6861 | -1679.9921 | 0.0000      | 0.0000    |
| 7942.3084             | 6663.2722   | 302.8530   | -1279.0362  | 6728.4640 |
| 300.7041              | 82.2655     | 39.3475    | 680285.8938 | -26.7042  |
| -26.7022              |             |            |             |           |
| [6865]ENERGY: 2530000 | 3189.2209   | 5450.9110  | 5706.7413   |           |
| 334.5539              | -14047.6051 | -1833.6665 | 0.0000      | 0.0000    |
| 7865.1827             | 6665.3383   | 299.9121   | -1199.8444  | 6729.9083 |
| 300.8647              | 90.4197     | 43.6594    | 680285.8938 | -21.7706  |
| -21.7615              |             |            |             |           |
| [6901]ENERGY: 2540000 | 3284.4725   | 5434.0251  | 5728.9827   |           |

Supplementary Text 6

|                       |             |            |             |           |
|-----------------------|-------------|------------|-------------|-----------|
| 327.7802              | -14150.6241 | -1811.0708 | 0.0000      | 0.0000    |
| 7851.9604             | 6665.5260   | 299.4079   | -1186.4344  | 6730.4827 |
| 300.7681              | -47.1641    | -9.9730    | 680285.8938 | -20.9248  |
| -20.9378              |             |            |             |           |
| [6951]ENERGY: 2550000 | 3337.1994   | 5423.3751  | 5687.6710   |           |
| 330.1772              | -14205.1289 | -1747.7211 | 0.0000      | 0.0000    |
| 7842.4972             | 6668.0701   | 299.0471   | -1174.4272  | 6730.6522 |
| 300.8917              | 20.4258     | -29.6973   | 680285.8938 | -21.3728  |
| -21.3752              |             |            |             |           |
| [6987]ENERGY: 2560000 | 3337.7466   | 5335.4695  | 5695.4346   |           |
| 336.1057              | -14101.4832 | -1833.7214 | 0.0000      | 0.0000    |
| 7898.9947             | 6668.5463   | 301.2014   | -1230.4484  | 6732.4305 |
| 301.1080              | 21.4518     | -0.2053    | 680285.8938 | -20.9789  |
| -20.9710              |             |            |             |           |
| [7037]ENERGY: 2570000 | 3310.0369   | 5423.0725  | 5742.2164   |           |
| 358.5029              | -14268.3782 | -1733.2102 | 0.0000      | 0.0000    |
| 7835.6634             | 6667.9038   | 298.7865   | -1167.7596  | 6731.8250 |
| 300.9498              | 93.8808     | 51.2251    | 680285.8938 | -24.2891  |
| -24.2841              |             |            |             |           |
| [7073]ENERGY: 2580000 | 3296.5399   | 5436.6335  | 5680.3145   |           |
| 331.6235              | -14215.8857 | -1752.3036 | 0.0000      | 0.0000    |
| 7891.5205             | 6668.4426   | 300.9164   | -1223.0779  | 6731.1491 |
| 300.9708              | 55.7669     | -7.0252    | 680285.8938 | -24.2911  |
| -24.2850              |             |            |             |           |
| [7123]ENERGY: 2590000 | 3232.4632   | 5389.3311  | 5712.0527   |           |
| 330.1178              | -14079.6781 | -1805.4003 | 0.0000      | 0.0000    |
| 7887.7324             | 6666.6188   | 300.7720   | -1221.1135  | 6730.7549 |
| 301.1220              | 70.7867     | 32.7811    | 680285.8938 | -28.6690  |
| -28.6663              |             |            |             |           |
| [7162]ENERGY: 2600000 | 3310.8690   | 5305.5399  | 5624.7046   |           |
| 320.6358              | -14116.8892 | -1772.6898 | 0.0000      | 0.0000    |
| 7993.4008             | 6665.5709   | 304.8013   | -1327.8299  | 6731.2384 |
| 301.0249              | -120.2083   | -32.0830   | 680285.8938 | -26.2457  |
| -26.2290              |             |            |             |           |
| [7212]ENERGY: 2610000 | 3185.8188   | 5399.8234  | 5683.5137   |           |
| 348.8793              | -14101.6556 | -1770.1356 | 0.0000      | 0.0000    |
| 7919.2436             | 6665.4876   | 301.9735   | -1253.7560  | 6731.1458 |
| 301.1575              | 17.4256     | -17.4240   | 680285.8938 | -27.5003  |
| -27.5139              |             |            |             |           |
| [7248]ENERGY: 2620000 | 3201.0941   | 5421.1726  | 5705.1325   |           |
| 342.5566              | -14179.7350 | -1732.3045 | 0.0000      | 0.0000    |
| 7907.9025             | 6665.8188   | 301.5411   | -1242.0838  | 6731.9552 |
| 301.0651              | 92.9768     | 38.0084    | 680285.8938 | -30.2454  |
| -30.2624              |             |            |             |           |
| [7298]ENERGY: 2630000 | 3300.6887   | 5344.4810  | 5714.2949   |           |
| 337.8298              | -14126.8433 | -1785.1165 | 0.0000      | 0.0000    |
| 7884.3980             | 6669.7326   | 300.6448   | -1214.6654  | 6733.0765 |
| 301.0902              | -15.7029    | 0.0310     | 680285.8938 | -25.1026  |
| -25.0830              |             |            |             |           |
| [7334]ENERGY: 2640000 | 3218.6528   | 5401.2489  | 5740.7151   |           |
| 326.2883              | -14106.6091 | -1780.3426 | 0.0000      | 0.0000    |
| 7870.9300             | 6670.8834   | 300.1313   | -1200.0466  | 6732.8757 |
| 301.0739              | 201.6096    | 19.0467    | 680285.8938 | -29.2165  |
| -29.2308              |             |            |             |           |



## Supplementary Text 6

|                       |             |            |             |           |
|-----------------------|-------------|------------|-------------|-----------|
| [7384]ENERGY: 2650000 | 3245.8963   | 5333.2795  | 5806.4586   |           |
| 354.8067              | -14137.0548 | -1760.5876 | 0.0000      | 0.0000    |
| 7828.0949             | 6670.8936   | 298.4979   | -1157.2012  | 6733.9244 |
| 301.3070              | 119.8824    | 70.3745    | 680285.8938 | -25.5884  |
| -25.5866              |             |            |             |           |
| [7420]ENERGY: 2660000 | 3276.8789   | 5430.5140  | 5663.4525   |           |
| 326.5028              | -14162.8926 | -1780.1998 | 0.0000      | 0.0000    |
| 7916.8174             | 6671.0733   | 301.8810   | -1245.7442  | 6731.7297 |
| 301.2872              | -54.6725    | -35.2426   | 680285.8938 | -28.2387  |
| -28.2395              |             |            |             |           |
| [7470]ENERGY: 2670000 | 3245.1100   | 5467.4628  | 5672.0450   |           |
| 318.1876              | -14133.3981 | -1764.1473 | 0.0000      | 0.0000    |
| 7862.8797             | 6668.1397   | 299.8243   | -1194.7400  | 6732.7953 |
| 301.2050              | -67.2673    | 12.0859    | 680285.8938 | -27.7463  |
| -27.7334              |             |            |             |           |
| [7506]ENERGY: 2680000 | 3271.0955   | 5378.3366  | 5730.8701   |           |
| 320.4947              | -14204.4077 | -1726.9236 | 0.0000      | 0.0000    |
| 7897.2752             | 6666.7409   | 301.1358   | -1230.5343  | 6732.1642 |
| 301.1082              | -25.0735    | -4.2123    | 680285.8938 | -27.4074  |
| -27.4264              |             |            |             |           |
| [7556]ENERGY: 2690000 | 3198.5745   | 5447.8261  | 5729.9479   |           |
| 351.4550              | -14128.2967 | -1820.2684 | 0.0000      | 0.0000    |
| 7890.5922             | 6669.8305   | 300.8810   | -1220.7616  | 6733.6486 |
| 301.1946              | 21.4727     | -65.4332   | 680285.8938 | -21.9532  |
| -21.9500              |             |            |             |           |
| [7595]ENERGY: 2700000 | 3272.5790   | 5344.8215  | 5728.8829   |           |
| 336.0232              | -14127.5432 | -1771.3603 | 0.0000      | 0.0000    |
| 7888.9715             | 6672.3746   | 300.8192   | -1216.5969  | 6733.8832 |
| 301.3314              | -35.2323    | -47.3642   | 680285.8938 | -26.3319  |
| -26.3269              |             |            |             |           |
| [7645]ENERGY: 2710000 | 3191.6071   | 5504.1674  | 5674.6198   |           |
| 336.2629              | -14257.6089 | -1705.7873 | 0.0000      | 0.0000    |
| 7927.9701             | 6671.2311   | 302.3063   | -1256.7390  | 6733.4781 |
| 301.2163              | 11.9012     | -6.0561    | 680285.8938 | -27.0721  |
| -27.0964              |             |            |             |           |
| [7681]ENERGY: 2720000 | 3180.5971   | 5418.3519  | 5724.9547   |           |
| 346.2597              | -14117.0774 | -1772.9598 | 0.0000      | 0.0000    |
| 7888.6970             | 6668.8232   | 300.8087   | -1219.8738  | 6733.7886 |
| 301.1809              | -3.0108     | 14.6180    | 680285.8938 | -24.6603  |
| -24.6315              |             |            |             |           |
| [7731]ENERGY: 2730000 | 3228.8625   | 5474.0272  | 5659.5869   |           |
| 324.7858              | -14157.4995 | -1766.3800 | 0.0000      | 0.0000    |
| 7904.2633             | 6667.6462   | 301.4023   | -1236.6171  | 6734.4313 |
| 301.1359              | -48.0441    | -18.7086   | 680285.8938 | -25.0919  |
| -25.1009              |             |            |             |           |
| [7767]ENERGY: 2740000 | 3195.8635   | 5415.7300  | 5769.6703   |           |
| 317.5661              | -14222.4476 | -1725.5995 | 0.0000      | 0.0000    |
| 7919.0634             | 6669.8463   | 301.9667   | -1249.2171  | 6734.2358 |
| 301.2049              | 110.1035    | 17.8545    | 680285.8938 | -26.1425  |
| -26.1478              |             |            |             |           |
| [7817]ENERGY: 2750000 | 3294.2653   | 5335.2124  | 5703.7557   |           |
| 320.9882              | -14168.9822 | -1740.9146 | 0.0000      | 0.0000    |
| 7926.6390             | 6670.9637   | 302.2555   | -1255.6753  | 6734.4324 |
| 301.2071              | -17.1964    | -47.4678   | 680285.8938 | -23.0095  |

Supplementary Text 6

-23.0107  
 [7853]ENERGY: 2760000      3204.7539      5480.9314      5706.5756  
 342.3942      -14217.0706      -1774.7816      0.0000      0.0000  
 7926.3051      6669.1080      302.2428      -1257.1970      6734.1367  
 301.4018      -107.3096      -125.1888      680285.8938      -23.4526  
 -23.4373  
 [7903]ENERGY: 2770000      3298.8727      5459.9358      5697.9185  
 348.6350      -14193.6971      -1842.2346      0.0000      0.0000  
 7902.7829      6672.2132      301.3459      -1230.5697      6734.3799  
 301.4578      -63.6515      -63.2451      680285.8938      -26.3589  
 -26.3536  
 [7939]ENERGY: 2780000      3258.0979      5453.7362      5723.4462  
 326.4421      -14222.3690      -1813.9371      0.0000      0.0000  
 7943.6346      6669.0508      302.9036      -1274.5838      6734.1614  
 301.6843      -53.1076      -23.4529      680285.8938      -26.4703  
 -26.4683  
 [7989]ENERGY: 2790000      3310.1923      5433.0459      5708.2650  
 324.7771      -14267.9760      -1777.2846      0.0000      0.0000  
 7944.1662      6675.1859      302.9239      -1268.9803      6737.3119  
 301.6949      -44.1979      -54.1722      680285.8938      -23.9951  
 -24.0001  
 [8028]ENERGY: 2800000      3224.3337      5393.5792      5735.5956  
 334.2089      -14124.2967      -1727.4954      0.0000      0.0000  
 7834.9136      6670.8389      298.7579      -1164.0747      6735.9548  
 301.6274      19.0941      -56.7308      680285.8938      -22.8954  
 -22.9184  
 [8078]ENERGY: 2810000      3267.7431      5405.0309      5698.3491  
 333.2643      -14180.2967      -1720.4536      0.0000      0.0000  
 7869.1618      6672.7990      300.0638      -1196.3628      6736.0817  
 301.7073      -68.9734      11.1380      680285.8938      -22.4772  
 -22.4867  
 [8114]ENERGY: 2820000      3255.9070      5370.4328      5727.5928  
 337.6408      -14113.8997      -1787.3165      0.0000      0.0000  
 7883.2617      6673.6189      300.6015      -1209.6428      6735.4227  
 301.6353      -210.1092      -179.4922      680285.8938      -25.6567  
 -25.6244  
 [8164]ENERGY: 2830000      3337.9455      5348.0926      5717.5736  
 342.6440      -14096.5591      -1852.3539      0.0000      0.0000  
 7878.0864      6675.4292      300.4041      -1202.6572      6737.1586  
 301.4789      -34.0511      -78.0152      680285.8938      -24.5920  
 -24.6065  
 [8200]ENERGY: 2840000      3314.9025      5423.5688      5708.7336  
 347.6051      -14168.4220      -1854.7382      0.0000      0.0000  
 7903.7062      6675.3560      301.3811      -1228.3502      6735.6855  
 301.7338      -98.9867      -122.9422      680285.8938      -29.0627  
 -29.0624  
 [8250]ENERGY: 2850000      3257.9040      5483.1555      5670.7629  
 332.4951      -14182.3559      -1761.0913      0.0000      0.0000  
 7869.1677      6670.0381      300.0641      -1199.1296      6736.2759  
 301.7380      71.8643      -54.7967      680285.8938      -28.7427  
 -28.7584  
 [8286]ENERGY: 2860000      3296.4450      5422.1096      5707.0214  
 335.0418      -14187.0184      -1768.5199      0.0000      0.0000  
 7866.3650      6671.4446      299.9572      -1194.9204      6735.8030

## Supplementary Text 6

|                       |             |            |             |           |
|-----------------------|-------------|------------|-------------|-----------|
| 301.7411              | -154.9791   | -170.4817  | 680285.8938 | -27.4831  |
| -27.4656              |             |            |             |           |
| [8336]ENERGY: 2870000 | 3277.8137   | 5430.1408  | 5719.7337   |           |
| 331.0683              | -14221.0936 | -1839.1769 | 0.0000      | 0.0000    |
| 7969.6226             | 6668.1086   | 303.8946   | -1301.5140  | 6736.6436 |
| 301.6597              | -74.5522    | -82.2984   | 680285.8938 | -25.1974  |
| -25.1996              |             |            |             |           |
| [8372]ENERGY: 2880000 | 3259.1511   | 5412.9318  | 5732.8171   |           |
| 321.2703              | -14122.9774 | -1767.1295 | 0.0000      | 0.0000    |
| 7838.2386             | 6674.3019   | 298.8847   | -1163.9367  | 6736.5679 |
| 301.5855              | -55.0279    | -64.8628   | 680285.8938 | -24.0206  |
| -23.9999              |             |            |             |           |
| [8422]ENERGY: 2890000 | 3217.3264   | 5433.6663  | 5714.3607   |           |
| 338.2184              | -14205.0002 | -1792.1712 | 0.0000      | 0.0000    |
| 7965.5230             | 6671.9234   | 303.7382   | -1293.5996  | 6735.9152 |
| 301.7194              | -21.3897    | -73.1689   | 680285.8938 | -26.3611  |
| -26.3824              |             |            |             |           |
| [8461]ENERGY: 2900000 | 3301.9642   | 5405.2204  | 5701.2232   |           |
| 338.0469              | -14155.2124 | -1815.0679 | 0.0000      | 0.0000    |
| 7897.1159             | 6673.2903   | 301.1298   | -1223.8256  | 6737.0493 |
| 301.7216              | -2.8262     | -128.5458  | 680285.8938 | -29.2380  |
| -29.2452              |             |            |             |           |
| [8511]ENERGY: 2910000 | 3230.3995   | 5394.8502  | 5689.1937   |           |
| 332.5508              | -14071.5043 | -1777.8132 | 0.0000      | 0.0000    |
| 7875.2031             | 6672.8797   | 300.2942   | -1202.3233  | 6736.6056 |
| 301.6748              | 21.9701     | 30.8085    | 680285.8938 | -24.6926  |
| -24.6915              |             |            |             |           |
| [8547]ENERGY: 2920000 | 3228.3190   | 5353.3124  | 5720.0646   |           |
| 326.0864              | -14206.3802 | -1758.9026 | 0.0000      | 0.0000    |
| 8005.6817             | 6668.1814   | 305.2696   | -1337.5003  | 6735.4182 |
| 301.6508              | 241.7229    | 96.9366    | 680285.8938 | -27.4983  |
| -27.4915              |             |            |             |           |
| [8597]ENERGY: 2930000 | 3305.2974   | 5409.2372  | 5660.2363   |           |
| 328.4527              | -14159.5405 | -1776.4787 | 0.0000      | 0.0000    |
| 7905.3164             | 6672.5208   | 301.4425   | -1232.7956  | 6736.9039 |
| 301.6194              | -134.3592   | -167.0333  | 680285.8938 | -29.4981  |
| -29.4943              |             |            |             |           |
| [8633]ENERGY: 2940000 | 3260.1046   | 5413.6360  | 5655.4530   |           |
| 328.8157              | -14180.4358 | -1756.7310 | 0.0000      | 0.0000    |
| 7951.6942             | 6672.5366   | 303.2109   | -1279.1576  | 6738.4193 |
| 301.7785              | -99.1172    | -74.5560   | 680285.8938 | -27.7598  |
| -27.7663              |             |            |             |           |
| [8683]ENERGY: 2950000 | 3226.9365   | 5418.9797  | 5756.0322   |           |
| 330.6125              | -14270.3013 | -1716.4566 | 0.0000      | 0.0000    |
| 7928.0123             | 6673.8153   | 302.3079   | -1254.1970  | 6738.1253 |
| 301.8628              | 105.7885    | 26.9203    | 680285.8938 | -23.6979  |
| -23.6991              |             |            |             |           |
| [8719]ENERGY: 2960000 | 3221.3784   | 5403.9357  | 5696.5599   |           |
| 352.2534              | -14172.2126 | -1754.8478 | 0.0000      | 0.0000    |
| 7925.1761             | 6672.2432   | 302.1997   | -1252.9329  | 6737.6352 |
| 301.8646              | -127.8129   | -82.2292   | 680285.8938 | -22.4327  |
| -22.4108              |             |            |             |           |
| [8769]ENERGY: 2970000 | 3251.1455   | 5529.5155  | 5681.7406   |           |
| 347.7049              | -14215.4466 | -1819.8111 | 0.0000      | 0.0000    |

Supplementary Text 6

|                       |             |            |             |           |
|-----------------------|-------------|------------|-------------|-----------|
| 7895.4062             | 6670.2551   | 301.0646   | -1225.1510  | 6739.3686 |
| 301.7235              | -56.7343    | -80.9032   | 680285.8938 | -25.1183  |
| -25.0991              |             |            |             |           |
| [8805]ENERGY: 2980000 | 3326.7671   | 5456.1337  | 5731.2514   |           |
| 342.7100              | -14226.3377 | -1816.3599 | 0.0000      | 0.0000    |
| 7861.9346             | 6676.0992   | 299.7882   | -1185.8354  | 6739.2606 |
| 301.6731              | -68.1578    | -112.1838  | 680285.8938 | -23.0779  |
| -23.1062              |             |            |             |           |
| [8855]ENERGY: 2990000 | 3322.9228   | 5449.3895  | 5689.4182   |           |
| 331.3690              | -14169.5721 | -1818.4304 | 0.0000      | 0.0000    |
| 7868.6735             | 6673.7705   | 300.0452   | -1194.9030  | 6738.3913 |
| 301.5412              | -78.9801    | -57.0779   | 680285.8938 | -24.5535  |
| -24.5553              |             |            |             |           |
| [8894]ENERGY: 3000000 | 3319.9294   | 5405.7358  | 5698.6499   |           |
| 360.9079              | -14205.7395 | -1763.2641 | 0.0000      | 0.0000    |
| 7863.6530             | 6679.8723   | 299.8538   | -1183.7807  | 6739.1453 |
| 301.6292              | 53.2016     | -27.1104   | 680285.8938 | -26.4583  |
| -26.4663              |             |            |             |           |
| [8944]ENERGY: 3010000 | 3327.4501   | 5428.5227  | 5681.2987   |           |
| 340.4762              | -14139.6396 | -1846.9303 | 0.0000      | 0.0000    |
| 7882.6669             | 6673.8446   | 300.5788   | -1208.8223  | 6738.0561 |
| 301.7163              | -44.2173    | -58.8911   | 680285.8938 | -22.2223  |
| -22.2085              |             |            |             |           |
| [8980]ENERGY: 3020000 | 3246.7131   | 5410.6340  | 5698.1097   |           |
| 343.2709              | -14175.4108 | -1744.9524 | 0.0000      | 0.0000    |
| 7897.3085             | 6675.6730   | 301.1371   | -1221.6355  | 6739.0134 |
| 301.6999              | -87.2076    | -134.7390  | 680285.8938 | -26.7558  |
| -26.7603              |             |            |             |           |
| [9030]ENERGY: 3030000 | 3303.9420   | 5391.6052  | 5704.9029   |           |
| 328.6121              | -14195.7849 | -1877.1144 | 0.0000      | 0.0000    |
| 8017.6422             | 6673.8051   | 305.7256   | -1343.8371  | 6739.2842 |
| 301.7816              | -130.6435   | -127.1231  | 680285.8938 | -24.2433  |
| -24.2415              |             |            |             |           |
| [9066]ENERGY: 3040000 | 3240.0259   | 5370.5253  | 5752.7562   |           |
| 351.5461              | -14116.8920 | -1789.5166 | 0.0000      | 0.0000    |
| 7867.9945             | 6676.4394   | 300.0193   | -1191.5551  | 6739.6138 |
| 301.8567              | 16.3732     | -17.5192   | 680285.8938 | -27.2252  |
| -27.2289              |             |            |             |           |
| [9116]ENERGY: 3050000 | 3208.7029   | 5453.7632  | 5676.4159   |           |
| 337.1009              | -14205.6795 | -1721.6764 | 0.0000      | 0.0000    |
| 7924.8041             | 6673.4313   | 302.1856   | -1251.3729  | 6737.3967 |
| 301.8078              | 167.6894    | 136.6962   | 680285.8938 | -23.0366  |
| -23.0351              |             |            |             |           |
| [9152]ENERGY: 3060000 | 3259.6914   | 5410.5961  | 5685.2934   |           |
| 330.5101              | -14253.1288 | -1726.2349 | 0.0000      | 0.0000    |
| 7963.8889             | 6670.6164   | 303.6759   | -1293.2726  | 6737.6229 |
| 301.7195              | -79.4085    | -44.6596   | 680285.8938 | -26.8726  |
| -26.8689              |             |            |             |           |
| [9202]ENERGY: 3070000 | 3261.6322   | 5436.2987  | 5682.0263   |           |
| 340.7706              | -14171.3715 | -1841.1290 | 0.0000      | 0.0000    |
| 7966.8490             | 6675.0762   | 303.7888   | -1291.7728  | 6738.7775 |
| 301.8934              | -4.3322     | 27.0755    | 680285.8938 | -26.4574  |
| -26.4553              |             |            |             |           |
| [9238]ENERGY: 3080000 | 3312.7321   | 5313.3554  | 5676.9663   |           |

## Supplementary Text 6

|                       |             |            |             |           |
|-----------------------|-------------|------------|-------------|-----------|
| 309.0691              | -14161.6382 | -1752.6217 | 0.0000      | 0.0000    |
| 7976.5944             | 6674.4575   | 304.1604   | -1302.1369  | 6738.7042 |
| 301.7991              | -213.7417   | -199.8228  | 680285.8938 | -25.9270  |
| -25.9275              |             |            |             |           |
| [9288]ENERGY: 3090000 | 3279.8707   | 5388.2776  | 5763.1192   |           |
| 356.4637              | -14218.6353 | -1742.8844 | 0.0000      | 0.0000    |
| 7848.8841             | 6675.0956   | 299.2906   | -1173.7885  | 6738.7368 |
| 301.6937              | -22.2980    | -24.6872   | 680285.8938 | -27.7624  |
| -27.7589              |             |            |             |           |
| [9327]ENERGY: 3100000 | 3288.0398   | 5334.2582  | 5726.2732   |           |
| 313.8130              | -14123.9685 | -1775.0518 | 0.0000      | 0.0000    |
| 7911.0373             | 6674.4011   | 301.6606   | -1236.6361  | 6738.7897 |
| 301.6424              | -39.4955    | -52.5863   | 680285.8938 | -23.9817  |
| -23.9867              |             |            |             |           |
| [9377]ENERGY: 3110000 | 3298.7411   | 5415.1879  | 5730.4697   |           |
| 334.7914              | -14269.3488 | -1720.5678 | 0.0000      | 0.0000    |
| 7883.6250             | 6672.8986   | 300.6153   | -1210.7265  | 6739.0467 |
| 301.7338              | 82.1870     | -75.8756   | 680285.8938 | -25.4325  |
| -25.4510              |             |            |             |           |
| [9413]ENERGY: 3120000 | 3268.2737   | 5411.8898  | 5683.4499   |           |
| 348.7264              | -14163.3769 | -1733.2450 | 0.0000      | 0.0000    |
| 7861.5249             | 6677.2429   | 299.7726   | -1184.2821  | 6739.1058 |
| 301.7554              | 65.5229     | 35.6464    | 680285.8938 | -24.3614  |
| -24.3569              |             |            |             |           |
| [9463]ENERGY: 3130000 | 3251.1926   | 5388.0198  | 5769.1256   |           |
| 333.6533              | -14207.3627 | -1733.7046 | 0.0000      | 0.0000    |
| 7874.3793             | 6675.3032   | 300.2628   | -1199.0761  | 6740.1870 |
| 301.7097              | 230.4668    | 164.9622   | 680285.8938 | -25.6176  |
| -25.6382              |             |            |             |           |
| [9499]ENERGY: 3140000 | 3243.1635   | 5366.5486  | 5728.1038   |           |
| 331.3780              | -14329.2160 | -1640.4580 | 0.0000      | 0.0000    |
| 7974.1599             | 6673.6798   | 304.0676   | -1300.4801  | 6738.3645 |
| 301.6596              | 91.2830     | 85.0058    | 680285.8938 | -24.6480  |
| -24.6193              |             |            |             |           |
| [9549]ENERGY: 3150000 | 3242.2839   | 5553.7923  | 5634.9906   |           |
| 349.2301              | -14250.3541 | -1715.0959 | 0.0000      | 0.0000    |
| 7861.1079             | 6675.9548   | 299.7567   | -1185.1531  | 6739.3902 |
| 301.8552              | 92.4151     | 79.6594    | 680285.8938 | -30.7585  |
| -30.7406              |             |            |             |           |
| [9585]ENERGY: 3160000 | 3313.3628   | 5356.2012  | 5677.0595   |           |
| 332.4302              | -14122.8665 | -1792.8813 | 0.0000      | 0.0000    |
| 7918.4528             | 6681.7587   | 301.9434   | -1236.6942  | 6740.5781 |
| 301.9253              | -204.1384   | -185.5670  | 680285.8938 | -30.9354  |
| -30.9363              |             |            |             |           |
| [9635]ENERGY: 3170000 | 3269.3778   | 5489.2843  | 5664.4154   |           |
| 334.2763              | -14248.2380 | -1765.7433 | 0.0000      | 0.0000    |
| 7932.1362             | 6675.5086   | 302.4651   | -1256.6276  | 6741.2877 |
| 301.8204              | -161.3725   | -86.5056   | 680285.8938 | -28.0017  |
| -28.0188              |             |            |             |           |
| [9671]ENERGY: 3180000 | 3218.1353   | 5450.9364  | 5710.2930   |           |
| 354.4454              | -14235.7940 | -1776.3624 | 0.0000      | 0.0000    |
| 7954.7131             | 6676.3667   | 303.3260   | -1278.3464  | 6741.1724 |
| 301.9534              | 140.6957    | 77.8856    | 680285.8938 | -21.8691  |
| -21.8699              |             |            |             |           |

Supplementary Text 6

|                        |             |            |             |           |
|------------------------|-------------|------------|-------------|-----------|
| [9721]ENERGY: 3190000  | 3309.3262   | 5343.4027  | 5707.1874   |           |
| 327.2889               | -14154.1050 | -1783.3871 | 0.0000      | 0.0000    |
| 7927.5588              | 6677.2720   | 302.2906   | -1250.2868  | 6742.0705 |
| 301.9707               | -195.5996   | -167.2166  | 680285.8938 | -25.7099  |
| -25.7191               |             |            |             |           |
| [9760]ENERGY: 3200000  | 3280.6665   | 5546.7241  | 5732.2960   |           |
| 326.9288               | -14335.9351 | -1729.8736 | 0.0000      | 0.0000    |
| 7857.9839              | 6678.7905   | 299.6376   | -1179.1934  | 6741.4768 |
| 301.8108               | -42.9931    | -39.1059   | 680285.8938 | -27.7203  |
| -27.7117               |             |            |             |           |
| [9810]ENERGY: 3210000  | 3293.2167   | 5405.6561  | 5741.9863   |           |
| 331.8821               | -14116.2781 | -1835.0565 | 0.0000      | 0.0000    |
| 7859.0083              | 6680.4150   | 299.6767   | -1178.5933  | 6743.0107 |
| 301.9853               | -110.5749   | -106.5363  | 680285.8938 | -24.9241  |
| -24.9298               |             |            |             |           |
| [9846]ENERGY: 3220000  | 3251.8381   | 5416.5740  | 5732.1399   |           |
| 333.0843               | -14196.9087 | -1758.9306 | 0.0000      | 0.0000    |
| 7900.6748              | 6678.4718   | 301.2655   | -1222.2030  | 6742.3568 |
| 302.1722               | 86.8143     | 44.3524    | 680285.8938 | -23.6853  |
| -23.6840               |             |            |             |           |
| [9896]ENERGY: 3230000  | 3213.3323   | 5460.5571  | 5692.0000   |           |
| 351.8060               | -14163.3471 | -1746.6423 | 0.0000      | 0.0000    |
| 7873.7801              | 6681.4861   | 300.2399   | -1192.2940  | 6744.0186 |
| 302.1231               | 37.8656     | -29.8680   | 680285.8938 | -26.0393  |
| -26.0222               |             |            |             |           |
| [9932]ENERGY: 3240000  | 3321.7131   | 5367.0175  | 5745.0806   |           |
| 325.4846               | -14129.5431 | -1800.0647 | 0.0000      | 0.0000    |
| 7854.1008              | 6683.7888   | 299.4895   | -1170.3121  | 6743.8891 |
| 302.1750               | 115.2479    | 7.4445     | 680285.8938 | -20.9897  |
| -21.0086               |             |            |             |           |
| [9982]ENERGY: 3250000  | 3219.4671   | 5451.4864  | 5666.2208   |           |
| 335.7023               | -14249.2113 | -1765.7807 | 0.0000      | 0.0000    |
| 8018.1795              | 6676.0640   | 305.7461   | -1342.1155  | 6744.8809 |
| 302.0226               | 77.1222     | 76.7893    | 680285.8938 | -21.5264  |
| -21.5306               |             |            |             |           |
| [10018]ENERGY: 3260000 | 3250.3576   | 5420.3229  | 5708.2888   |           |
| 347.5391               | -14192.0110 | -1779.1571 | 0.0000      | 0.0000    |
| 7924.7086              | 6680.0489   | 302.1819   | -1244.6597  | 6744.8372 |
| 302.0402               | 33.5993     | -80.7991   | 680285.8938 | -21.2086  |
| -21.1932               |             |            |             |           |
| [10068]ENERGY: 3270000 | 3224.2719   | 5564.6840  | 5713.4867   |           |
| 325.4809               | -14264.3730 | -1748.3314 | 0.0000      | 0.0000    |
| 7868.2846              | 6683.5037   | 300.0304   | -1184.7809  | 6744.9943 |
| 302.1065               | -34.7933    | -5.9795    | 680285.8938 | -23.4181  |
| -23.4220               |             |            |             |           |
| [10104]ENERGY: 3280000 | 3320.8176   | 5500.5592  | 5694.6615   |           |
| 338.8941               | -14212.2765 | -1783.1792 | 0.0000      | 0.0000    |
| 7823.0622              | 6682.5390   | 298.3060   | -1140.5232  | 6744.8883 |
| 302.1954               | -67.9656    | -29.0278   | 680285.8938 | -20.5330  |
| -20.5389               |             |            |             |           |
| [10154]ENERGY: 3290000 | 3224.2026   | 5466.8164  | 5670.0709   |           |
| 311.6760               | -14172.0057 | -1772.8092 | 0.0000      | 0.0000    |
| 7950.5612              | 6678.5121   | 303.1677   | -1272.0491  | 6743.7361 |
| 302.1250               | -197.0100   | -73.9148   | 680285.8938 | -23.9015  |

Supplementary Text 6

-23.8832  
 [10193]ENERGY: 3300000      3292.3345      5433.3165      5756.9671  
 339.0678      -14091.6565      -1857.9457      0.0000      0.0000  
 7811.2106      6683.2944      297.8541      -1127.9161      6745.6426  
 302.2540      135.9484      120.8069      680285.8938      -21.4015  
 -21.4182  
 [10243]ENERGY: 3310000      3269.6049      5424.1305      5731.8333  
 337.2537      -14192.6980      -1829.1750      0.0000      0.0000  
 7937.0277      6677.9770      302.6517      -1259.0507      6744.3753  
 302.3059      64.9911      70.4039      680285.8938      -21.6131  
 -21.6048  
 [10279]ENERGY: 3320000      3308.3521      5365.9902      5726.0419  
 333.6123      -14226.2802      -1749.7641      0.0000      0.0000  
 7922.3164      6680.2686      302.0907      -1242.0478      6743.7180  
 302.1810      164.2150      86.2970      680285.8938      -22.2582  
 -22.2589  
 [10329]ENERGY: 3330000      3263.5066      5434.1091      5690.2402  
 344.6756      -14150.5982      -1801.3516      0.0000      0.0000  
 7897.1686      6677.7504      301.1318      -1219.4182      6741.7831  
 302.2432      -3.8106      -131.4538      680285.8938      -26.5430  
 -26.5464  
 [10365]ENERGY: 3340000      3239.1703      5462.1521      5706.8485  
 334.2053      -14207.9984      -1763.7651      0.0000      0.0000  
 7910.7522      6681.3648      301.6497      -1229.3873      6743.6043  
 302.2787      112.1202      15.1558      680285.8938      -24.7455  
 -24.7449  
 [10415]ENERGY: 3350000      3241.5615      5388.1814      5736.7048  
 341.4730      -14194.0085      -1709.9185      0.0000      0.0000  
 7877.9056      6681.8993      300.3972      -1196.0063      6742.9433  
 302.0649      94.3721      94.4984      680285.8938      -26.7948  
 -26.7990  
 [10451]ENERGY: 3360000      3309.1738      5468.9842      5708.7581  
 315.8059      -14206.3064      -1788.7462      0.0000      0.0000  
 7873.5212      6681.1906      300.2301      -1192.3306      6742.6442  
 302.1672      52.6841      41.2132      680285.8938      -22.2882  
 -22.2728  
 [10501]ENERGY: 3370000      3286.9129      5353.2536      5723.1626  
 318.6123      -14231.4226      -1726.8600      0.0000      0.0000  
 7956.2732      6679.9319      303.3855      -1276.3413      6743.7931  
 301.9507      -52.5944      -45.2260      680285.8938      -28.0496  
 -28.0723  
 [10537]ENERGY: 3380000      3299.5167      5390.1481      5696.3444  
 322.9504      -14179.6930      -1789.1275      0.0000      0.0000  
 7937.9648      6678.1039      302.6874      -1259.8610      6743.8553  
 302.1179      -65.1825      -56.9491      680285.8938      -22.6723  
 -22.6780  
 [10587]ENERGY: 3390000      3248.4128      5455.1508      5739.6545  
 333.7826      -14283.5826      -1728.4980      0.0000      0.0000  
 7918.5778      6683.4978      301.9481      -1235.0800      6745.0131  
 302.3335      169.7329      149.1519      680285.8938      -27.9074  
 -27.9012  
 [10626]ENERGY: 3400000      3311.5052      5500.0759      5707.5799  
 322.8925      -14228.2707      -1804.2314      0.0000      0.0000  
 7871.3265      6680.8780      300.1464      -1190.4485      6743.8297

Supplementary Text 6

|                        |             |            |             |           |
|------------------------|-------------|------------|-------------|-----------|
| 302.2451               | -100.9465   | -111.6964  | 680285.8938 | -22.4106  |
| -22.4007               |             |            |             |           |
| [10676]ENERGY: 3410000 | 3295.8087   | 5445.6436  | 5669.1595   |           |
| 332.2822               | -14160.1531 | -1772.1475 | 0.0000      | 0.0000    |
| 7870.3693              | 6680.9626   | 300.1099   | -1189.4067  | 6745.1694 |
| 302.3945               | 72.0061     | 82.4492    | 680285.8938 | -23.8216  |
| -23.8231               |             |            |             |           |
| [10712]ENERGY: 3420000 | 3217.9798   | 5487.6014  | 5687.4495   |           |
| 335.8153               | -14233.9586 | -1719.8958 | 0.0000      | 0.0000    |
| 7904.7926              | 6679.7841   | 301.4225   | -1225.0085  | 6745.3723 |
| 302.3798               | 178.4769    | 53.5115    | 680285.8938 | -24.7390  |
| -24.7280               |             |            |             |           |
| [10762]ENERGY: 3430000 | 3218.5668   | 5507.1722  | 5737.8021   |           |
| 341.9551               | -14296.0204 | -1768.3675 | 0.0000      | 0.0000    |
| 7937.6245              | 6678.7328   | 302.6744   | -1258.8917  | 6745.9374 |
| 302.3667               | 34.0241     | -31.3433   | 680285.8938 | -25.2389  |
| -25.2616               |             |            |             |           |
| [10798]ENERGY: 3440000 | 3319.9545   | 5409.1037  | 5762.5783   |           |
| 328.9498               | -14253.6418 | -1765.1361 | 0.0000      | 0.0000    |
| 7882.7763              | 6684.5847   | 300.5830   | -1198.1917  | 6745.9113 |
| 302.3174               | -80.2011    | -100.4280  | 680285.8938 | -28.3058  |
| -28.2889               |             |            |             |           |
| [10848]ENERGY: 3450000 | 3264.2394   | 5456.1788  | 5722.0629   |           |
| 335.3453               | -14250.7217 | -1742.2772 | 0.0000      | 0.0000    |
| 7897.9162              | 6682.7438   | 301.1603   | -1215.1724  | 6746.3054 |
| 302.4229               | 54.3388     | 4.0207     | 680285.8938 | -30.3329  |
| -30.3529               |             |            |             |           |
| [10884]ENERGY: 3460000 | 3275.9313   | 5374.9215  | 5712.1521   |           |
| 335.5534               | -14221.7403 | -1731.5776 | 0.0000      | 0.0000    |
| 7937.5578              | 6682.7982   | 302.6719   | -1254.7596  | 6746.1555 |
| 302.4824               | -42.0895    | 19.7717    | 680285.8938 | -28.3305  |
| -28.3052               |             |            |             |           |
| [10934]ENERGY: 3470000 | 3321.6221   | 5400.7044  | 5703.1826   |           |
| 342.8402               | -14260.3987 | -1785.3037 | 0.0000      | 0.0000    |
| 7960.1226              | 6682.7695   | 303.5323   | -1277.3531  | 6745.9772 |
| 302.3453               | -75.8349    | 26.3402    | 680285.8938 | -28.1956  |
| -28.1935               |             |            |             |           |
| [10970]ENERGY: 3480000 | 3290.7224   | 5369.4732  | 5692.0968   |           |
| 329.5222               | -14200.2194 | -1779.8833 | 0.0000      | 0.0000    |
| 7984.4322              | 6686.1440   | 304.4593   | -1298.2882  | 6746.1293 |
| 302.3808               | 9.7013      | -100.2234  | 680285.8938 | -28.8158  |
| -28.8298               |             |            |             |           |
| [11020]ENERGY: 3490000 | 3273.3974   | 5361.7520  | 5755.4493   |           |
| 333.7271               | -14119.5965 | -1917.0399 | 0.0000      | 0.0000    |
| 7997.0711              | 6684.7605   | 304.9412   | -1312.3106  | 6746.6955 |
| 302.4374               | -229.1939   | -224.5202  | 680285.8938 | -26.2187  |
| -26.2140               |             |            |             |           |
| [11059]ENERGY: 3500000 | 3247.0707   | 5464.8978  | 5708.9915   |           |
| 323.7214               | -14227.2812 | -1783.9865 | 0.0000      | 0.0000    |
| 7949.6451              | 6683.0589   | 303.1328   | -1266.5863  | 6746.4702 |
| 302.5261               | 14.5575     | -11.4591   | 680285.8938 | -27.5925  |
| -27.5855               |             |            |             |           |
| [11109]ENERGY: 3510000 | 3264.8078   | 5357.4408  | 5663.3572   |           |
| 333.5268               | -14148.4780 | -1753.5793 | 0.0000      | 0.0000    |



## Supplementary Text 6

|                        |             |            |             |           |
|------------------------|-------------|------------|-------------|-----------|
| 7963.4539              | 6680.5290   | 303.6593   | -1282.9249  | 6744.4056 |
| 302.5561               | -0.5591     | 30.0823    | 680285.8938 | -28.4549  |
| -28.4670               |             |            |             |           |
| [11145]ENERGY: 3520000 | 3284.6306   | 5485.4782  | 5692.5257   |           |
| 324.5246               | -14172.6257 | -1829.8688 | 0.0000      | 0.0000    |
| 7898.4978              | 6683.1625   | 301.1825   | -1215.3354  | 6747.5295 |
| 302.5483               | 56.5859     | -15.8056   | 680285.8938 | -25.5099  |
| -25.5188               |             |            |             |           |
| [11195]ENERGY: 3530000 | 3284.2921   | 5418.1749  | 5699.1592   |           |
| 355.8590               | -14268.8745 | -1701.1720 | 0.0000      | 0.0000    |
| 7894.3456              | 6681.7843   | 301.0241   | -1212.5613  | 6746.7404 |
| 302.4340               | -15.1176    | 11.8754    | 680285.8938 | -28.7443  |
| -28.7236               |             |            |             |           |
| [11231]ENERGY: 3540000 | 3332.4372   | 5377.5241  | 5676.0621   |           |
| 324.2793               | -14180.0169 | -1783.3599 | 0.0000      | 0.0000    |
| 7934.7723              | 6681.6981   | 302.5657   | -1253.0742  | 6747.4077 |
| 302.5343               | 93.5141     | 1.8228     | 680285.8938 | -25.4831  |
| -25.4920               |             |            |             |           |
| [11281]ENERGY: 3550000 | 3263.7121   | 5491.8945  | 5715.4752   |           |
| 314.1793               | -14215.5414 | -1837.0431 | 0.0000      | 0.0000    |
| 7946.7782              | 6679.4548   | 303.0235   | -1267.3234  | 6746.4755 |
| 302.6414               | -60.1321    | -5.4666    | 680285.8938 | -29.2796  |
| -29.2681               |             |            |             |           |
| [11317]ENERGY: 3560000 | 3310.8507   | 5429.6536  | 5698.7461   |           |
| 345.5782               | -14155.1291 | -1805.4049 | 0.0000      | 0.0000    |
| 7860.9768              | 6685.2714   | 299.7517   | -1175.7054  | 6747.5081 |
| 302.5402               | -4.7370     | -82.2061   | 680285.8938 | -31.1694  |
| -31.1939               |             |            |             |           |
| [11367]ENERGY: 3570000 | 3243.3431   | 5464.8228  | 5712.6261   |           |
| 336.0068               | -14218.4636 | -1733.5994 | 0.0000      | 0.0000    |
| 7880.5149              | 6685.2505   | 300.4967   | -1195.2644  | 6748.7214 |
| 302.5816               | 151.1748    | 215.7027   | 680285.8938 | -28.9827  |
| -28.9654               |             |            |             |           |
| [11403]ENERGY: 3580000 | 3271.6021   | 5552.6273  | 5636.4273   |           |
| 338.1990               | -14193.6927 | -1791.0170 | 0.0000      | 0.0000    |
| 7868.9133              | 6683.0594   | 300.0544   | -1185.8539  | 6748.2207 |
| 302.4374               | -1.1700     | -20.5874   | 680285.8938 | -28.2828  |
| -28.2872               |             |            |             |           |
| [11453]ENERGY: 3590000 | 3293.1988   | 5428.2587  | 5697.0567   |           |
| 306.9785               | -14214.1514 | -1777.1580 | 0.0000      | 0.0000    |
| 7946.5189              | 6680.7023   | 303.0136   | -1265.8167  | 6749.5012 |
| 302.4342               | -86.9447    | -17.4646   | 680285.8938 | -29.0578  |
| -29.0370               |             |            |             |           |
| [11492]ENERGY: 3600000 | 3353.0443   | 5447.5646  | 5720.4466   |           |
| 327.9389               | -14210.9604 | -1790.0076 | 0.0000      | 0.0000    |
| 7839.6308              | 6687.6573   | 298.9378   | -1151.9736  | 6750.5488 |
| 302.3984               | -216.5047   | -167.8892  | 680285.8938 | -23.3293  |
| -23.3503               |             |            |             |           |
| [11542]ENERGY: 3610000 | 3252.2038   | 5487.4154  | 5704.2695   |           |
| 314.6701               | -14222.9814 | -1823.8836 | 0.0000      | 0.0000    |
| 7972.9398              | 6684.6337   | 304.0211   | -1288.3061  | 6750.8743 |
| 302.4319               | 176.8144    | 123.0355   | 680285.8938 | -22.2776  |
| -22.2954               |             |            |             |           |
| [11578]ENERGY: 3620000 | 3306.5497   | 5403.2369  | 5723.9347   |           |

## Supplementary Text 6

|                        |             |            |             |           |
|------------------------|-------------|------------|-------------|-----------|
| 355.6674               | -14141.1569 | -1839.2466 | 0.0000      | 0.0000    |
| 7877.8374              | 6686.8227   | 300.3946   | -1191.0147  | 6749.8522 |
| 302.4659               | 13.9510     | 51.1920    | 680285.8938 | -21.0835  |
| -21.0746               |             |            |             |           |
| [11628]ENERGY: 3630000 | 3329.0778   | 5416.0023  | 5719.8462   |           |
| 327.2065               | -14212.8784 | -1818.7082 | 0.0000      | 0.0000    |
| 7926.8703              | 6687.4164   | 302.2643   | -1239.4539  | 6751.5950 |
| 302.6964               | -36.2551    | -79.4413   | 680285.8938 | -25.1092  |
| -25.1003               |             |            |             |           |
| [11664]ENERGY: 3640000 | 3188.7545   | 5499.1751  | 5715.9492   |           |
| 312.0201               | -14267.2794 | -1726.3187 | 0.0000      | 0.0000    |
| 7961.4435              | 6683.7443   | 303.5827   | -1277.6992  | 6750.5745 |
| 302.7046               | -38.5421    | -4.6287    | 680285.8938 | -27.0325  |
| -27.0212               |             |            |             |           |
| [11714]ENERGY: 3650000 | 3232.0061   | 5348.2160  | 5722.5781   |           |
| 340.8420               | -14161.2728 | -1789.6692 | 0.0000      | 0.0000    |
| 7991.8252              | 6684.5256   | 304.7412   | -1307.2996  | 6749.5932 |
| 302.4769               | 63.9986     | 35.1999    | 680285.8938 | -19.6337  |
| -19.6533               |             |            |             |           |
| [11750]ENERGY: 3660000 | 3324.4752   | 5370.1089  | 5734.3706   |           |
| 322.4461               | -14214.3146 | -1774.4012 | 0.0000      | 0.0000    |
| 7920.8463              | 6683.5313   | 302.0346   | -1237.3150  | 6749.3464 |
| 302.3799               | -156.6960   | -186.6303  | 680285.8938 | -24.0157  |
| -24.0029               |             |            |             |           |
| [11800]ENERGY: 3670000 | 3218.6973   | 5568.6514  | 5671.0026   |           |
| 325.8932               | -14117.7023 | -1833.7114 | 0.0000      | 0.0000    |
| 7853.4299              | 6686.2606   | 299.4639   | -1167.1693  | 6750.2511 |
| 302.3800               | -43.0001    | -73.8874   | 680285.8938 | -21.1111  |
| -21.1305               |             |            |             |           |
| [11836]ENERGY: 3680000 | 3343.5976   | 5353.6123  | 5689.7238   |           |
| 353.4566               | -14148.2561 | -1792.5384 | 0.0000      | 0.0000    |
| 7888.0055              | 6687.6013   | 300.7824   | -1200.4043  | 6749.0846 |
| 302.4100               | 3.4625      | -53.3387   | 680285.8938 | -21.8009  |
| -21.7924               |             |            |             |           |
| [11886]ENERGY: 3690000 | 3310.2416   | 5439.4170  | 5680.9887   |           |
| 346.6430               | -14099.5970 | -1859.9371 | 0.0000      | 0.0000    |
| 7869.1785              | 6686.9347   | 300.0645   | -1182.2438  | 6750.4350 |
| 302.3744               | -90.7010    | -114.9231  | 680285.8938 | -24.3138  |
| -24.3276               |             |            |             |           |
| [11925]ENERGY: 3700000 | 3236.8271   | 5448.9633  | 5711.9562   |           |
| 358.8602               | -14192.8071 | -1745.2870 | 0.0000      | 0.0000    |
| 7870.8176              | 6689.3303   | 300.1270   | -1181.4874  | 6748.6544 |
| 302.7278               | -68.7459    | -30.6802   | 680285.8938 | -26.0595  |
| -26.0363               |             |            |             |           |
| [11975]ENERGY: 3710000 | 3261.8653   | 5385.8457  | 5753.6372   |           |
| 344.3457               | -14136.3822 | -1840.8619 | 0.0000      | 0.0000    |
| 7919.7665              | 6688.2162   | 301.9935   | -1231.5504  | 6748.9374 |
| 302.9231               | -49.2960    | -145.3022  | 680285.8938 | -22.3410  |
| -22.3511               |             |            |             |           |
| [12011]ENERGY: 3720000 | 3314.3307   | 5360.9778  | 5721.9427   |           |
| 325.7947               | -14178.7855 | -1763.6170 | 0.0000      | 0.0000    |
| 7907.6863              | 6688.3297   | 301.5328   | -1219.3566  | 6748.6331 |
| 302.9081               | 54.1556     | -11.1513   | 680285.8938 | -26.0355  |
| -26.0239               |             |            |             |           |

## Supplementary Text 6

|                        |             |            |             |           |
|------------------------|-------------|------------|-------------|-----------|
| [12061]ENERGY: 3730000 | 3295.5083   | 5426.8155  | 5748.9104   |           |
| 353.1154               | -14233.7515 | -1797.6798 | 0.0000      | 0.0000    |
| 7893.3750              | 6686.2933   | 300.9871   | -1207.0817  | 6748.9200 |
| 302.9538               | -85.7233    | -90.2166   | 680285.8938 | -26.6638  |
| -26.6761               |             |            |             |           |
| [12097]ENERGY: 3740000 | 3284.0804   | 5492.5118  | 5700.6876   |           |
| 343.6084               | -14253.6292 | -1817.2614 | 0.0000      | 0.0000    |
| 7937.4223              | 6687.4200   | 302.6667   | -1250.0023  | 6748.6039 |
| 303.0156               | -97.3558    | -127.6005  | 680285.8938 | -23.8553  |
| -23.8599               |             |            |             |           |
| [12147]ENERGY: 3750000 | 3277.5089   | 5388.2800  | 5686.1356   |           |
| 330.3857               | -14144.4194 | -1824.4913 | 0.0000      | 0.0000    |
| 7971.0061              | 6684.4055   | 303.9473   | -1286.6006  | 6749.2510 |
| 302.9128               | -56.0345    | -89.5740   | 680285.8938 | -24.7068  |
| -24.7015               |             |            |             |           |
| [12183]ENERGY: 3760000 | 3347.4435   | 5437.0694  | 5749.8511   |           |
| 324.1451               | -14235.8876 | -1789.1194 | 0.0000      | 0.0000    |
| 7855.4254              | 6688.9274   | 299.5400   | -1166.4980  | 6749.0303 |
| 303.0860               | 46.7603     | -49.2540   | 680285.8938 | -21.6775  |
| -21.6872               |             |            |             |           |
| [12233]ENERGY: 3770000 | 3259.9381   | 5416.9699  | 5696.4955   |           |
| 327.2657               | -14144.2748 | -1812.6534 | 0.0000      | 0.0000    |
| 7943.6624              | 6687.4034   | 302.9047   | -1256.2590  | 6749.3649 |
| 302.9362               | 11.1935     | -15.3537   | 680285.8938 | -20.6133  |
| -20.5839               |             |            |             |           |
| [12269]ENERGY: 3780000 | 3297.3302   | 5289.4419  | 5696.9643   |           |
| 342.0499               | -14160.4112 | -1752.7210 | 0.0000      | 0.0000    |
| 7973.2982              | 6685.9524   | 304.0347   | -1287.3459  | 6749.7304 |
| 303.0373               | 3.2844      | 47.7777    | 680285.8938 | -22.7547  |
| -22.7443               |             |            |             |           |
| [12319]ENERGY: 3790000 | 3296.3927   | 5418.9175  | 5711.1885   |           |
| 334.8887               | -14186.4643 | -1812.0967 | 0.0000      | 0.0000    |
| 7924.5690              | 6687.3954   | 302.1766   | -1237.1736  | 6750.0101 |
| 303.0413               | -10.6766    | -66.9819   | 680285.8938 | -24.6023  |
| -24.6245               |             |            |             |           |
| [12358]ENERGY: 3800000 | 3255.7275   | 5474.9968  | 5660.7641   |           |
| 313.2304               | -14207.7044 | -1779.6507 | 0.0000      | 0.0000    |
| 7965.7856              | 6683.1493   | 303.7482   | -1282.6363  | 6750.1942 |
| 303.0639               | 96.1550     | 0.1058     | 680285.8938 | -22.9030  |
| -22.9090               |             |            |             |           |
| [12408]ENERGY: 3810000 | 3250.5265   | 5466.3689  | 5737.5051   |           |
| 329.0945               | -14238.3954 | -1818.7134 | 0.0000      | 0.0000    |
| 7956.9909              | 6683.3771   | 303.4129   | -1273.6138  | 6750.3336 |
| 303.1970               | -46.8471    | -58.1241   | 680285.8938 | -22.3522  |
| -22.3385               |             |            |             |           |
| [12444]ENERGY: 3820000 | 3298.9050   | 5512.1949  | 5689.4991   |           |
| 332.0813               | -14227.7915 | -1814.4984 | 0.0000      | 0.0000    |
| 7894.0220              | 6684.4124   | 301.0118   | -1209.6096  | 6750.4298 |
| 303.0532               | -34.6924    | -54.8925   | 680285.8938 | -22.5947  |
| -22.5994               |             |            |             |           |
| [12494]ENERGY: 3830000 | 3264.4315   | 5485.0386  | 5752.1592   |           |
| 336.9480               | -14281.2515 | -1828.2297 | 0.0000      | 0.0000    |
| 7956.6716              | 6685.7676   | 303.4007   | -1270.9040  | 6749.7975 |
| 303.2143               | 55.2248     | 11.3241    | 680285.8938 | -20.2914  |

Supplementary Text 6

-20.2960  
 [12530]ENERGY: 3840000      3246.2915      5470.4378      5720.4630  
 342.3300      -14188.7804      -1783.9635      0.0000      0.0000  
 7880.7030      6687.4815      300.5039      -1193.2215      6750.9766  
 303.1938      -71.6865      -112.8447      680285.8938      -19.7463  
 -19.7328  
 [12580]ENERGY: 3850000      3230.9796      5490.2878      5707.1771  
 317.7844      -14184.4495      -1812.1109      0.0000      0.0000  
 7935.4538      6685.1224      302.5917      -1250.3314      6749.4275  
 303.1415      -52.0967      -72.7979      680285.8938      -18.2027  
 -18.2200  
 [12616]ENERGY: 3860000      3285.3790      5475.3624      5686.1338  
 350.2642      -14143.8277      -1841.5571      0.0000      0.0000  
 7879.8925      6691.6470      300.4730      -1188.2455      6751.4708  
 303.2353      -125.7819      -119.0317      680285.8938      -19.2320  
 -19.2265  
 [12666]ENERGY: 3870000      3371.3791      5399.6528      5695.6996  
 327.5356      -14234.2583      -1783.3621      0.0000      0.0000  
 7911.4615      6688.1082      301.6768      -1223.3533      6751.7829  
 303.2069      -70.0349      -120.4284      680285.8938      -24.3974  
 -24.4102  
 [12702]ENERGY: 3880000      3254.3442      5408.9583      5738.2594  
 330.7799      -14182.2125      -1739.2748      0.0000      0.0000  
 7879.6594      6690.5140      300.4641      -1189.1455      6751.2319  
 303.1272      -9.2836      29.5230      680285.8938      -16.4641  
 -16.4399  
 [12752]ENERGY: 3890000      3312.7632      5418.8696      5670.4474  
 334.9984      -14195.7358      -1820.2870      0.0000      0.0000  
 7961.8358      6682.8916      303.5976      -1278.9441      6751.1349  
 302.9519      -279.7253      -236.1476      680285.8938      -22.8667  
 -22.8790  
 [12791]ENERGY: 3900000      3358.4686      5347.6859      5714.6621  
 328.7202      -14244.7231      -1824.1794      0.0000      0.0000  
 8004.6793      6685.3136      305.2313      -1319.3657      6751.0054  
 303.2683      -76.1916      -99.1502      680285.8938      -18.4895  
 -18.4955  
 [12841]ENERGY: 3910000      3307.3217      5495.4770      5733.8788  
 316.1752      -14195.3270      -1848.1143      0.0000      0.0000  
 7877.7111      6687.1224      300.3898      -1190.5887      6750.7150  
 303.2350      -96.7064      -138.9317      680285.8938      -18.7733  
 -18.7549  
 [12877]ENERGY: 3920000      3313.7516      5469.2425      5688.5152  
 327.2183      -14228.6165      -1786.5846      0.0000      0.0000  
 7903.1593      6686.6858      301.3602      -1216.4735      6750.1252  
 303.3465      -81.7757      -52.1890      680285.8938      -24.0111  
 -24.0102  
 [12927]ENERGY: 3930000      3242.2278      5371.4015      5702.7719  
 346.4733      -14096.5446      -1830.0312      0.0000      0.0000  
 7947.5801      6683.8787      303.0540      -1263.7013      6751.2133  
 303.0216      3.9838      -64.9509      680285.8938      -24.4021  
 -24.4240  
 [12963]ENERGY: 3940000      3342.1670      5381.8098      5721.0317  
 326.0268      -14170.2136      -1810.3434      0.0000      0.0000  
 7894.6243      6685.1026      301.0348      -1209.5218      6749.2906

## Supplementary Text 6

|                        |             |            |             |           |
|------------------------|-------------|------------|-------------|-----------|
| 303.3296               | 94.6629     | -48.3097   | 680285.8938 | -22.7121  |
| -22.7194               |             |            |             |           |
| [13013]ENERGY: 3950000 | 3294.5829   | 5473.4561  | 5748.6175   |           |
| 329.6600               | -14182.3920 | -1843.3708 | 0.0000      | 0.0000    |
| 7870.6131              | 6691.1668   | 300.1192   | -1179.4463  | 6751.9071 |
| 303.2336               | -18.8090    | -61.5819   | 680285.8938 | -23.8686  |
| -23.8528               |             |            |             |           |
| [13049]ENERGY: 3960000 | 3264.3999   | 5457.6423  | 5717.3882   |           |
| 328.0451               | -14198.1678 | -1851.7215 | 0.0000      | 0.0000    |
| 7970.3473              | 6687.9334   | 303.9222   | -1282.4139  | 6750.1390 |
| 303.4048               | -114.8850   | -70.1073   | 680285.8938 | -21.4050  |
| -21.4048               |             |            |             |           |
| [13099]ENERGY: 3970000 | 3230.3879   | 5373.5211  | 5711.0397   |           |
| 340.8793               | -14160.3405 | -1779.5117 | 0.0000      | 0.0000    |
| 7973.5681              | 6689.5440   | 304.0450   | -1284.0241  | 6750.9522 |
| 303.2991               | -67.1824    | -104.7018  | 680285.8938 | -21.0921  |
| -21.0974               |             |            |             |           |
| [13135]ENERGY: 3980000 | 3286.6826   | 5484.9406  | 5720.2372   |           |
| 337.8305               | -14318.8374 | -1769.6861 | 0.0000      | 0.0000    |
| 7944.8491              | 6686.0166   | 302.9499   | -1258.8325  | 6750.1750 |
| 303.1224               | -100.5497   | -84.5324   | 680285.8938 | -25.3819  |
| -25.3676               |             |            |             |           |
| [13185]ENERGY: 3990000 | 3251.1489   | 5415.6968  | 5673.1103   |           |
| 345.4362               | -14199.5021 | -1781.8298 | 0.0000      | 0.0000    |
| 7984.7376              | 6688.7979   | 304.4709   | -1295.9397  | 6751.2257 |
| 303.3324               | 87.3734     | -1.7445    | 680285.8938 | -21.3239  |
| -21.3328               |             |            |             |           |
| [13224]ENERGY: 4000000 | 3185.3275   | 5445.0355  | 5764.3337   |           |
| 334.7140               | -14228.8909 | -1779.3612 | 0.0000      | 0.0000    |
| 7964.5985              | 6685.7570   | 303.7030   | -1278.8415  | 6750.6612 |
| 303.4057               | 133.5599    | 85.9653    | 680285.8938 | -19.7591  |
| -19.7632               |             |            |             |           |
| [13274]ENERGY: 4010000 | 3294.1061   | 5460.7904  | 5670.9410   |           |
| 344.9614               | -14268.9003 | -1785.1245 | 0.0000      | 0.0000    |
| 7969.7845              | 6686.5587   | 303.9007   | -1283.2258  | 6749.5304 |
| 303.4921               | -109.7532   | -72.9814   | 680285.8938 | -20.7610  |
| -20.7424               |             |            |             |           |
| [13310]ENERGY: 4020000 | 3257.2884   | 5397.6653  | 5741.4043   |           |
| 328.3356               | -14262.3221 | -1796.1023 | 0.0000      | 0.0000    |
| 8018.7453              | 6685.0145   | 305.7677   | -1333.7307  | 6750.4372 |
| 303.6254               | -103.5004   | -66.5156   | 680285.8938 | -26.2146  |
| -26.2269               |             |            |             |           |
| [13360]ENERGY: 4030000 | 3340.2773   | 5483.1062  | 5702.0617   |           |
| 331.4548               | -14283.7784 | -1767.1491 | 0.0000      | 0.0000    |
| 7882.5458              | 6688.5184   | 300.5742   | -1194.0275  | 6751.6479 |
| 303.5481               | -88.8200    | -54.7263   | 680285.8938 | -20.9586  |
| -20.9596               |             |            |             |           |
| [13396]ENERGY: 4040000 | 3240.2182   | 5440.5336  | 5762.0039   |           |
| 351.3555               | -14203.1577 | -1730.2846 | 0.0000      | 0.0000    |
| 7828.4786              | 6689.1474   | 298.5125   | -1139.3311  | 6752.0770 |
| 303.4807               | 34.5016     | 36.2926    | 680285.8938 | -20.0668  |
| -20.0674               |             |            |             |           |
| [13446]ENERGY: 4050000 | 3216.8837   | 5393.4695  | 5754.5620   |           |
| 317.9460               | -14144.0201 | -1865.9124 | 0.0000      | 0.0000    |

## Supplementary Text 6

|                        |             |            |             |           |
|------------------------|-------------|------------|-------------|-----------|
| 8013.0387              | 6685.9673   | 305.5501   | -1327.0713  | 6753.3772 |
| 303.3128               | -44.5747    | -55.8984   | 680285.8938 | -20.7190  |
| -20.6988               |             |            |             |           |
| [13482]ENERGY: 4060000 | 3309.2427   | 5532.2967  | 5703.1546   |           |
| 319.5612               | -14208.5745 | -1841.4246 | 0.0000      | 0.0000    |
| 7876.1638              | 6690.4199   | 300.3308   | -1185.7439  | 6754.0918 |
| 303.4532               | 3.3095      | -20.1159   | 680285.8938 | -23.9125  |
| -23.9246               |             |            |             |           |
| [13532]ENERGY: 4070000 | 3339.2706   | 5314.8065  | 5705.0950   |           |
| 352.6604               | -14198.2329 | -1768.9696 | 0.0000      | 0.0000    |
| 7945.4347              | 6690.0648   | 302.9722   | -1255.3699  | 6753.9616 |
| 303.5295               | 59.0112     | -21.1026   | 680285.8938 | -17.4037  |
| -17.4187               |             |            |             |           |
| [13568]ENERGY: 4080000 | 3314.9513   | 5349.3006  | 5722.7036   |           |
| 330.2578               | -14235.0397 | -1747.9291 | 0.0000      | 0.0000    |
| 7954.8892              | 6689.1336   | 303.3328   | -1265.7556  | 6754.4600 |
| 303.5500               | 89.8698     | 85.7959    | 680285.8938 | -19.1752  |
| -19.1607               |             |            |             |           |
| [13618]ENERGY: 4090000 | 3274.7937   | 5363.9604  | 5740.8067   |           |
| 326.0477               | -14204.5228 | -1749.6568 | 0.0000      | 0.0000    |
| 7939.3914              | 6690.8203   | 302.7418   | -1248.5711  | 6754.2207 |
| 303.3709               | 19.9041     | -0.5482    | 680285.8938 | -21.8047  |
| -21.8157               |             |            |             |           |
| [13657]ENERGY: 4100000 | 3312.0560   | 5387.8442  | 5753.2533   |           |
| 343.8958               | -14276.8368 | -1641.0825 | 0.0000      | 0.0000    |
| 7812.4062              | 6691.5363   | 297.8996   | -1120.8699  | 6755.0804 |
| 303.4894               | 74.8129     | 132.3706   | 680285.8938 | -20.1912  |
| -20.1800               |             |            |             |           |
| [13707]ENERGY: 4110000 | 3297.6383   | 5467.2407  | 5680.1244   |           |
| 322.1334               | -14225.2975 | -1731.3150 | 0.0000      | 0.0000    |
| 7879.7990              | 6690.3233   | 300.4694   | -1189.4757  | 6754.8401 |
| 303.5050               | 15.4288     | 19.8875    | 680285.8938 | -21.9118  |
| -21.9256               |             |            |             |           |
| [13743]ENERGY: 4120000 | 3287.8036   | 5432.2974  | 5715.1316   |           |
| 335.7687               | -14190.1968 | -1807.6870 | 0.0000      | 0.0000    |
| 7914.2179              | 6687.3354   | 301.7819   | -1226.8825  | 6753.3005 |
| 303.4476               | -69.1083    | 21.1161    | 680285.8938 | -20.2835  |
| -20.2794               |             |            |             |           |
| [13793]ENERGY: 4130000 | 3315.8964   | 5354.2431  | 5745.2237   |           |
| 325.7543               | -14183.4634 | -1806.4391 | 0.0000      | 0.0000    |
| 7941.3153              | 6692.5303   | 302.8152   | -1248.7850  | 6757.0772 |
| 303.4819               | -13.4627    | -54.4622   | 680285.8938 | -21.1770  |
| -21.1606               |             |            |             |           |
| [13829]ENERGY: 4140000 | 3290.4491   | 5471.2298  | 5701.5169   |           |
| 335.4178               | -14243.4675 | -1810.6282 | 0.0000      | 0.0000    |
| 7947.8329              | 6692.3508   | 303.0637   | -1255.4821  | 6755.6212 |
| 303.5045               | 3.8848      | -13.2149   | 680285.8938 | -20.1835  |
| -20.1907               |             |            |             |           |
| [13879]ENERGY: 4150000 | 3332.9911   | 5398.3011  | 5748.7834   |           |
| 332.0508               | -14252.9657 | -1858.2465 | 0.0000      | 0.0000    |
| 7992.4087              | 6693.3229   | 304.7634   | -1299.0858  | 6756.2654 |
| 303.3926               | -125.7769   | -166.1817  | 680285.8938 | -22.3084  |
| -22.3152               |             |            |             |           |
| [13915]ENERGY: 4160000 | 3277.0179   | 5367.0200  | 5702.2583   |           |

## Supplementary Text 6

|                        |             |            |             |           |
|------------------------|-------------|------------|-------------|-----------|
| 345.0322               | -14102.8235 | -1804.5459 | 0.0000      | 0.0000    |
| 7908.4872              | 6692.4463   | 301.5634   | -1216.0409  | 6756.5904 |
| 303.5255               | -174.1861   | -83.1445   | 680285.8938 | -21.5030  |
| -21.4952               |             |            |             |           |
| [13965]ENERGY: 4170000 | 3273.3455   | 5422.0422  | 5735.4587   |           |
| 337.9049               | -14289.4730 | -1785.6500 | 0.0000      | 0.0000    |
| 7996.8248              | 6690.4531   | 304.9318   | -1306.3716  | 6756.2211 |
| 303.4521               | 39.2413     | -18.8039   | 680285.8938 | -17.8057  |
| -17.8093               |             |            |             |           |
| [14001]ENERGY: 4180000 | 3250.4766   | 5335.1654  | 5772.9067   |           |
| 326.6050               | -14177.2689 | -1746.8011 | 0.0000      | 0.0000    |
| 7928.5346              | 6689.6182   | 302.3278   | -1238.9163  | 6755.7118 |
| 303.5497               | -32.0121    | 37.1413    | 680285.8938 | -21.3379  |
| -21.3331               |             |            |             |           |
| [14051]ENERGY: 4190000 | 3291.7452   | 5380.5041  | 5754.8233   |           |
| 338.4014               | -14227.1744 | -1756.0026 | 0.0000      | 0.0000    |
| 7911.1855              | 6693.4824   | 301.6663   | -1217.7031  | 6755.9782 |
| 303.5249               | -135.3590   | -100.4948  | 680285.8938 | -19.9202  |
| -19.9289               |             |            |             |           |
| [14090]ENERGY: 4200000 | 3268.9151   | 5369.3235  | 5696.9764   |           |
| 333.9563               | -14133.3109 | -1818.4029 | 0.0000      | 0.0000    |
| 7975.4883              | 6692.9457   | 304.1182   | -1282.5426  | 6757.9361 |
| 303.5865               | 55.3133     | -1.4044    | 680285.8938 | -24.7278  |
| -24.7322               |             |            |             |           |
| [14140]ENERGY: 4210000 | 3320.7659   | 5396.1591  | 5749.6872   |           |
| 334.0161               | -14235.0089 | -1800.1467 | 0.0000      | 0.0000    |
| 7926.9592              | 6692.4319   | 302.2677   | -1234.5273  | 6757.7320 |
| 303.7158               | 17.3011     | -17.7294   | 680285.8938 | -20.8050  |
| -20.8103               |             |            |             |           |
| [14176]ENERGY: 4220000 | 3322.1417   | 5372.4611  | 5723.6151   |           |
| 325.4702               | -14198.9035 | -1748.2580 | 0.0000      | 0.0000    |
| 7903.1647              | 6699.6914   | 301.3604   | -1203.4733  | 6758.8817 |
| 303.7953               | -10.5430    | -49.1505   | 680285.8938 | -22.8011  |
| -22.7992               |             |            |             |           |
| [14226]ENERGY: 4230000 | 3261.3201   | 5342.2094  | 5779.2991   |           |
| 323.6247               | -14248.1568 | -1750.7885 | 0.0000      | 0.0000    |
| 7987.7195              | 6695.2275   | 304.5846   | -1292.4921  | 6758.7147 |
| 303.8065               | 1.6672      | 18.8671    | 680285.8938 | -22.8504  |
| -22.8579               |             |            |             |           |
| [14262]ENERGY: 4240000 | 3310.7237   | 5450.6174  | 5688.7577   |           |
| 349.6355               | -14216.2770 | -1784.7238 | 0.0000      | 0.0000    |
| 7897.3027              | 6696.0360   | 301.1369   | -1201.2667  | 6759.5081 |
| 303.7869               | 37.0457     | 9.6248     | 680285.8938 | -21.8455  |
| -21.8221               |             |            |             |           |
| [14312]ENERGY: 4250000 | 3253.2191   | 5452.4176  | 5749.0748   |           |
| 327.9697               | -14267.1175 | -1781.1252 | 0.0000      | 0.0000    |
| 7961.1569              | 6695.5955   | 303.5718   | -1265.5614  | 6759.6730 |
| 303.6232               | 41.2977     | -38.7817   | 680285.8938 | -23.2973  |
| -23.3049               |             |            |             |           |
| [14348]ENERGY: 4260000 | 3286.8735   | 5292.5637  | 5743.2052   |           |
| 344.2831               | -14198.0327 | -1782.3746 | 0.0000      | 0.0000    |
| 8007.9096              | 6694.4278   | 305.3545   | -1313.4817  | 6759.9020 |
| 303.6534               | 2.2562      | 32.7343    | 680285.8938 | -20.3945  |
| -20.3889               |             |            |             |           |

## Supplementary Text 6

|                        |             |            |             |           |
|------------------------|-------------|------------|-------------|-----------|
| [14398]ENERGY: 4270000 | 3257.3045   | 5361.6168  | 5722.5725   |           |
| 322.4632               | -14195.1231 | -1752.1784 | 0.0000      | 0.0000    |
| 7981.2326              | 6697.8881   | 304.3373   | -1283.3445  | 6759.7006 |
| 303.6326               | -167.8303   | -84.2461   | 680285.8938 | -19.3595  |
| -19.3610               |             |            |             |           |
| [14434]ENERGY: 4280000 | 3210.5656   | 5483.1877  | 5688.7060   |           |
| 371.0432               | -14151.2262 | -1821.9314 | 0.0000      | 0.0000    |
| 7914.6849              | 6695.0297   | 301.7997   | -1219.6552  | 6759.8746 |
| 303.5446               | 39.1165     | -25.0831   | 680285.8938 | -20.5042  |
| -20.4984               |             |            |             |           |
| [14484]ENERGY: 4290000 | 3287.1732   | 5337.0663  | 5710.5485   |           |
| 334.8818               | -14241.7137 | -1775.9069 | 0.0000      | 0.0000    |
| 8041.1654              | 6693.2146   | 306.6226   | -1347.9507  | 6760.5554 |
| 303.4525               | 10.4291     | 34.7674    | 680285.8938 | -19.6231  |
| -19.6309               |             |            |             |           |
| [14523]ENERGY: 4300000 | 3296.2149   | 5353.8555  | 5686.6268   |           |
| 357.2700               | -14199.0380 | -1736.9075 | 0.0000      | 0.0000    |
| 7939.0028              | 6697.0244   | 302.7270   | -1241.9783  | 6759.9307 |
| 303.6106               | 83.8483     | 23.7623    | 680285.8938 | -17.4463  |
| -17.4459               |             |            |             |           |
| [14573]ENERGY: 4310000 | 3372.9032   | 5352.2815  | 5706.0290   |           |
| 361.1821               | -14140.4453 | -1832.9541 | 0.0000      | 0.0000    |
| 7879.7336              | 6698.7300   | 300.4669   | -1181.0036  | 6760.8239 |
| 303.5020               | 39.0027     | 26.0019    | 680285.8938 | -19.3751  |
| -19.3880               |             |            |             |           |
| [14609]ENERGY: 4320000 | 3317.0914   | 5444.5341  | 5722.1009   |           |
| 344.5645               | -14244.2816 | -1826.0840 | 0.0000      | 0.0000    |
| 7938.1188              | 6696.0442   | 302.6933   | -1242.0746  | 6761.8371 |
| 303.6993               | -100.9924   | -85.6038   | 680285.8938 | -21.1885  |
| -21.1621               |             |            |             |           |
| [14659]ENERGY: 4330000 | 3317.2033   | 5406.6644  | 5728.8804   |           |
| 344.2515               | -14096.2694 | -1905.4423 | 0.0000      | 0.0000    |
| 7903.3742              | 6698.6622   | 301.3684   | -1204.7121  | 6762.6144 |
| 303.6147               | -143.6947   | -219.6924  | 680285.8938 | -20.4682  |
| -20.4948               |             |            |             |           |
| [14695]ENERGY: 4340000 | 3244.3248   | 5475.1626  | 5649.8770   |           |
| 342.1960               | -14226.7417 | -1799.1192 | 0.0000      | 0.0000    |
| 8010.0673              | 6695.7669   | 305.4368   | -1314.3004  | 6761.1841 |
| 303.3511               | 5.5377      | 28.9034    | 680285.8938 | -24.7059  |
| -24.6803               |             |            |             |           |
| [14745]ENERGY: 4350000 | 3278.0676   | 5463.1066  | 5713.7222   |           |
| 325.8957               | -14247.8701 | -1850.7999 | 0.0000      | 0.0000    |
| 8013.8210              | 6695.9432   | 305.5799   | -1317.8779  | 6760.8645 |
| 303.5521               | 14.8290     | -5.9449    | 680285.8938 | -23.0302  |
| -23.0597               |             |            |             |           |
| [14781]ENERGY: 4360000 | 3291.4679   | 5406.5440  | 5772.6170   |           |
| 310.2809               | -14202.1525 | -1858.2086 | 0.0000      | 0.0000    |
| 7978.8357              | 6699.3844   | 304.2459   | -1279.4513  | 6759.9758 |
| 303.7242               | 130.2715    | 15.5788    | 680285.8938 | -20.8550  |
| -20.8556               |             |            |             |           |
| [14831]ENERGY: 4370000 | 3225.4647   | 5349.3998  | 5720.0618   |           |
| 326.2463               | -14134.1252 | -1757.1067 | 0.0000      | 0.0000    |
| 7969.4210              | 6699.3618   | 303.8869   | -1270.0592  | 6760.7154 |
| 303.4103               | 111.3694    | 64.6787    | 680285.8938 | -22.9462  |



Supplementary Text 6

-22.9266  
 [14867]ENERGY: 4380000      3348.2654      5440.4416      5715.9758  
 330.5905      -14268.5303      -1771.7661      0.0000      0.0000  
 7904.7115      6699.6884      301.4194      -1205.0230      6760.2468  
 303.7118      -15.6711      -63.6853      680285.8938      -20.6653  
 -20.6759  
 [14917]ENERGY: 4390000      3246.9568      5446.3869      5747.2398  
 326.7060      -14237.6108      -1820.0658      0.0000      0.0000  
 7987.4686      6697.0815      304.5751      -1290.3871      6762.3767  
 303.6867      -109.5599      -69.5778      680285.8938      -17.1787  
 -17.1659  
 [14956]ENERGY: 4400000      3366.1354      5428.1969      5699.9493  
 330.2275      -14248.6580      -1814.1159      0.0000      0.0000  
 7936.6261      6698.3613      302.6364      -1238.2648      6764.0146  
 303.8219      -84.0253      -78.6791      680285.8938      -19.5285  
 -19.5234  
 [15006]ENERGY: 4410000      3274.1463      5400.9083      5642.7868  
 329.9945      -14212.3489      -1802.2429      0.0000      0.0000  
 8065.4127      6698.6568      307.5472      -1366.7558      6761.9516  
 303.8717      -86.1128      -103.5693      680285.8938      -19.2829  
 -19.3074  
 [15042]ENERGY: 4420000      3314.7254      5369.5064      5676.2863  
 350.4887      -14198.8908      -1768.3618      0.0000      0.0000  
 7955.4854      6699.2396      303.3555      -1256.2458      6763.1383  
 303.7987      -30.9380      -81.6786      680285.8938      -16.6466  
 -16.6572  
 [15092]ENERGY: 4430000      3309.7639      5379.1837      5749.7420  
 338.7237      -14307.0645      -1766.2155      0.0000      0.0000  
 7994.4293      6698.5624      304.8405      -1295.8668      6761.6440  
 303.9031      3.9661      120.9926      680285.8938      -16.6320  
 -16.5815  
 [15128]ENERGY: 4440000      3268.5244      5488.4096      5708.7980  
 335.8702      -14198.7453      -1762.5664      0.0000      0.0000  
 7863.1105      6703.4011      299.8331      -1159.7094      6763.1782  
 303.7572      91.2287      16.7919      680285.8938      -15.9393  
 -15.9715  
 [15178]ENERGY: 4450000      3339.0900      5399.5595      5745.6879  
 347.0902      -14323.0201      -1757.8558      0.0000      0.0000  
 7948.0769      6698.6286      303.0730      -1249.4483      6763.2420  
 303.8039      -71.2934      -86.4815      680285.8938      -11.7860  
 -11.7799  
 [15214]ENERGY: 4460000      3317.5963      5390.5148      5739.4409  
 318.5450      -14234.6839      -1740.2128      0.0000      0.0000  
 7910.9737      6702.1740      301.6582      -1208.7997      6763.1679  
 303.8339      56.3009      0.0625      680285.8938      -17.8452  
 -17.8528  
 [15264]ENERGY: 4470000      3326.2055      5481.6748      5721.4665  
 343.0302      -14190.3463      -1846.3438      0.0000      0.0000  
 7863.5257      6699.2126      299.8489      -1164.3131      6764.2186  
 303.7874      -171.8865      -108.2690      680285.8938      -17.9844  
 -17.9783  
 [15300]ENERGY: 4480000      3397.0561      5435.3151      5673.0692  
 320.9448      -14326.0336      -1767.8920      0.0000      0.0000  
 7967.7955      6700.2551      303.8249      -1267.5405      6763.1761

## Supplementary Text 6

|                        |             |            |             |           |
|------------------------|-------------|------------|-------------|-----------|
| 303.9290               | -23.6692    | -88.2827   | 680285.8938 | -13.9118  |
| -13.9096               |             |            |             |           |
| [15350]ENERGY: 4490000 | 3312.1987   | 5507.2494  | 5727.6902   |           |
| 327.7311               | -14277.1001 | -1761.7475 | 0.0000      | 0.0000    |
| 7861.9249              | 6697.9465   | 299.7879   | -1163.9783  | 6763.9494 |
| 303.9288               | 8.2300      | 23.2107    | 680285.8938 | -15.5273  |
| -15.5258               |             |            |             |           |
| [15389]ENERGY: 4500000 | 3248.6011   | 5463.4068  | 5686.7784   |           |
| 330.4621               | -14200.2101 | -1795.7054 | 0.0000      | 0.0000    |
| 7968.0971              | 6701.4300   | 303.8364   | -1266.6671  | 6764.6997 |
| 303.8677               | 108.7837    | 99.4364    | 680285.8938 | -17.6019  |
| -17.6109               |             |            |             |           |
| [15439]ENERGY: 4510000 | 3215.6645   | 5437.8695  | 5695.8705   |           |
| 334.1280               | -14232.4476 | -1801.5518 | 0.0000      | 0.0000    |
| 8050.0726              | 6699.6057   | 306.9623   | -1350.4670  | 6764.7855 |
| 303.7089               | -41.0379    | -108.4530  | 680285.8938 | -16.4991  |
| -16.5177               |             |            |             |           |
| [15475]ENERGY: 4520000 | 3277.0249   | 5449.3908  | 5718.6918   |           |
| 341.4159               | -14172.9215 | -1798.4625 | 0.0000      | 0.0000    |
| 7883.1823              | 6698.3217   | 300.5985   | -1184.8606  | 6764.3259 |
| 303.7630               | 83.5946     | 50.8428    | 680285.8938 | -16.8958  |
| -16.8669               |             |            |             |           |
| [15525]ENERGY: 4530000 | 3290.4806   | 5479.6068  | 5655.7765   |           |
| 324.5484               | -14229.2716 | -1817.9644 | 0.0000      | 0.0000    |
| 7997.8621              | 6701.0383   | 304.9714   | -1296.8237  | 6764.2813 |
| 303.8084               | -55.5863    | -177.7452  | 680285.8938 | -17.2535  |
| -17.2556               |             |            |             |           |
| [15561]ENERGY: 4540000 | 3290.0319   | 5379.8764  | 5706.9605   |           |
| 319.7570               | -14262.5230 | -1730.5661 | 0.0000      | 0.0000    |
| 7996.5867              | 6700.1234   | 304.9227   | -1296.4633  | 6764.0796 |
| 304.0009               | -65.7342    | -48.5312   | 680285.8938 | -15.4516  |
| -15.4556               |             |            |             |           |
| [15611]ENERGY: 4550000 | 3343.2317   | 5425.3508  | 5672.1525   |           |
| 336.9252               | -14283.8840 | -1768.0743 | 0.0000      | 0.0000    |
| 7974.4475              | 6700.1496   | 304.0785   | -1274.2980  | 6765.8089 |
| 303.8216               | 13.0044     | -7.3608    | 680285.8938 | -12.9181  |
| -12.9115               |             |            |             |           |
| [15647]ENERGY: 4560000 | 3253.3278   | 5398.7778  | 5754.5627   |           |
| 355.0460               | -14232.6759 | -1803.4799 | 0.0000      | 0.0000    |
| 7974.7716              | 6700.3301   | 304.0909   | -1274.4415  | 6766.0818 |
| 303.7231               | 26.5971     | -3.2168    | 680285.8938 | -13.7754  |
| -13.7784               |             |            |             |           |
| [15697]ENERGY: 4570000 | 3340.1890   | 5400.3463  | 5745.0037   |           |
| 356.6984               | -14225.2623 | -1820.1818 | 0.0000      | 0.0000    |
| 7907.5703              | 6704.3636   | 301.5284   | -1203.2067  | 6765.9117 |
| 303.8407               | 23.5453     | -15.7850   | 680285.8938 | -15.6229  |
| -15.6281               |             |            |             |           |
| [15733]ENERGY: 4580000 | 3244.3971   | 5493.3764  | 5711.2323   |           |
| 325.1914               | -14173.2513 | -1863.0863 | 0.0000      | 0.0000    |
| 7963.5356              | 6701.3953   | 303.6625   | -1262.1404  | 6765.4864 |
| 303.9509               | 84.6100     | 18.7553    | 680285.8938 | -13.5526  |
| -13.5487               |             |            |             |           |
| [15783]ENERGY: 4590000 | 3299.2213   | 5393.8451  | 5706.1283   |           |
| 318.9668               | -14227.9142 | -1761.5765 | 0.0000      | 0.0000    |

## Supplementary Text 6

|                        |             |            |             |           |
|------------------------|-------------|------------|-------------|-----------|
| 7973.5478              | 6702.2186   | 304.0442   | -1271.3292  | 6764.6207 |
| 303.9333               | -84.2990    | -50.7883   | 680285.8938 | -11.7201  |
| -11.7165               |             |            |             |           |
| [15822]ENERGY: 4600000 | 3277.7834   | 5452.6270  | 5689.5270   |           |
| 345.9983               | -14189.5019 | -1820.4097 | 0.0000      | 0.0000    |
| 7944.8734              | 6700.8975   | 302.9508   | -1243.9759  | 6765.4580 |
| 303.8994               | -43.8113    | -69.0379   | 680285.8938 | -17.7434  |
| -17.7630               |             |            |             |           |
| [15872]ENERGY: 4610000 | 3286.8169   | 5330.8959  | 5762.0548   |           |
| 343.9552               | -14196.5202 | -1819.8801 | 0.0000      | 0.0000    |
| 7992.8734              | 6700.1959   | 304.7812   | -1292.6775  | 6765.8547 |
| 303.8428               | 161.5504    | 85.9033    | 680285.8938 | -17.4464  |
| -17.4395               |             |            |             |           |
| [15908]ENERGY: 4620000 | 3260.6685   | 5425.5742  | 5699.8264   |           |
| 348.7563               | -14216.4116 | -1835.7329 | 0.0000      | 0.0000    |
| 8014.3652              | 6697.0461   | 305.6007   | -1317.3191  | 6765.9045 |
| 303.8659               | -124.1855   | -93.0397   | 680285.8938 | -17.5779  |
| -17.5749               |             |            |             |           |
| [15958]ENERGY: 4630000 | 3210.2302   | 5417.0166  | 5768.9892   |           |
| 327.8703               | -14234.7332 | -1821.2101 | 0.0000      | 0.0000    |
| 8030.9994              | 6699.1625   | 306.2350   | -1331.8369  | 6765.8575 |
| 303.8941               | -60.3370    | 46.2671    | 680285.8938 | -12.9735  |
| -12.9652               |             |            |             |           |
| [15994]ENERGY: 4640000 | 3208.4287   | 5429.5389  | 5732.1022   |           |
| 329.4041               | -14190.6506 | -1850.0629 | 0.0000      | 0.0000    |
| 8039.8178              | 6698.5782   | 306.5712   | -1341.2396  | 6765.6005 |
| 303.7553               | 155.8783    | 56.9839    | 680285.8938 | -13.8307  |
| -13.8348               |             |            |             |           |
| [16044]ENERGY: 4650000 | 3253.1108   | 5378.2851  | 5730.0721   |           |
| 304.5874               | -14226.0543 | -1735.0791 | 0.0000      | 0.0000    |
| 7997.1711              | 6702.0931   | 304.9450   | -1295.0780  | 6766.4607 |
| 303.8463               | 137.1269    | 41.1825    | 680285.8938 | -12.0916  |
| -12.1051               |             |            |             |           |
| [16080]ENERGY: 4660000 | 3313.1857   | 5454.5832  | 5676.3740   |           |
| 326.3596               | -14234.1510 | -1821.6042 | 0.0000      | 0.0000    |
| 7986.8686              | 6701.6158   | 304.5522   | -1285.2528  | 6766.2307 |
| 303.8900               | 31.7130     | -20.9532   | 680285.8938 | -9.0114   |
| -8.9789                |             |            |             |           |
| [16130]ENERGY: 4670000 | 3223.2270   | 5428.2611  | 5722.8859   |           |
| 345.9115               | -14208.8731 | -1800.6570 | 0.0000      | 0.0000    |
| 7991.8087              | 6702.5641   | 304.7406   | -1289.2446  | 6765.8078 |
| 303.8979               | 45.8960     | 37.4275    | 680285.8938 | -15.4108  |
| -15.4363               |             |            |             |           |
| [16166]ENERGY: 4680000 | 3290.1572   | 5461.5098  | 5742.5450   |           |
| 327.3746               | -14203.1172 | -1795.9152 | 0.0000      | 0.0000    |
| 7882.9716              | 6705.5258   | 300.5904   | -1177.4459  | 6766.7908 |
| 304.1098               | -88.0702    | -61.8995   | 680285.8938 | -14.1200  |
| -14.1056               |             |            |             |           |
| [16216]ENERGY: 4690000 | 3300.2084   | 5444.2507  | 5732.3734   |           |
| 337.8976               | -14207.8607 | -1827.9563 | 0.0000      | 0.0000    |
| 7922.3836              | 6701.2967   | 302.0933   | -1221.0869  | 6767.0324 |
| 303.9065               | -3.5580     | -64.0760   | 680285.8938 | -9.6810   |
| -9.6892                |             |            |             |           |
| [16255]ENERGY: 4700000 | 3279.7070   | 5418.7106  | 5684.4154   |           |

## Supplementary Text 6

|                        |             |            |             |           |
|------------------------|-------------|------------|-------------|-----------|
| 337.0858               | -14250.2014 | -1816.4985 | 0.0000      | 0.0000    |
| 8042.3015              | 6695.5204   | 306.6659   | -1346.7811  | 6765.8131 |
| 303.9101               | -73.1553    | -94.0238   | 680285.8938 | -11.7731  |
| -11.7626               |             |            |             |           |
| [16305]ENERGY: 4710000 | 3240.8614   | 5432.2314  | 5682.5636   |           |
| 342.2015               | -14102.1974 | -1815.3606 | 0.0000      | 0.0000    |
| 7925.0128              | 6705.3127   | 302.1935   | -1219.7002  | 6767.6907 |
| 303.8742               | -69.4258    | -59.9508   | 680285.8938 | -14.5796  |
| -14.6015               |             |            |             |           |
| [16341]ENERGY: 4720000 | 3360.1679   | 5480.6205  | 5725.5666   |           |
| 360.1734               | -14301.4162 | -1861.4564 | 0.0000      | 0.0000    |
| 7942.7346              | 6706.3903   | 302.8693   | -1236.3443  | 6768.3106 |
| 303.9881               | -197.0799   | -106.7953  | 680285.8938 | -7.7800   |
| -7.7643                |             |            |             |           |
| [16391]ENERGY: 4730000 | 3232.0433   | 5472.9807  | 5763.4306   |           |
| 328.8589               | -14228.4500 | -1835.2030 | 0.0000      | 0.0000    |
| 7969.3303              | 6702.9909   | 303.8834   | -1266.3394  | 6768.0704 |
| 304.0286               | 125.2571    | 30.4761    | 680285.8938 | -10.2619  |
| -10.2676               |             |            |             |           |
| [16427]ENERGY: 4740000 | 3296.6594   | 5476.7065  | 5702.4951   |           |
| 315.9747               | -14261.0610 | -1886.3334 | 0.0000      | 0.0000    |
| 8055.6646              | 6700.1060   | 307.1755   | -1355.5586  | 6768.3295 |
| 303.8866               | -113.7066   | -200.0972  | 680285.8938 | -12.5068  |
| -12.5115               |             |            |             |           |
| [16477]ENERGY: 4750000 | 3285.6822   | 5373.5596  | 5710.7790   |           |
| 334.1271               | -14197.5010 | -1747.1523 | 0.0000      | 0.0000    |
| 7942.4889              | 6701.9835   | 302.8599   | -1240.5054  | 6767.1897 |
| 303.8224               | -9.3469     | 19.3509    | 680285.8938 | -11.3423  |
| -11.3353               |             |            |             |           |
| [16513]ENERGY: 4760000 | 3269.3958   | 5374.9987  | 5777.5239   |           |
| 344.8446               | -14271.5771 | -1806.7756 | 0.0000      | 0.0000    |
| 8013.2049              | 6701.6151   | 305.5564   | -1311.5898  | 6767.2205 |
| 303.8211               | 202.1595    | 96.9262    | 680285.8938 | -7.5967   |
| -7.6015                |             |            |             |           |
| [16563]ENERGY: 4770000 | 3373.3522   | 5458.6386  | 5773.3219   |           |
| 339.4801               | -14248.2774 | -1895.7678 | 0.0000      | 0.0000    |
| 7903.2415              | 6703.9891   | 301.3633   | -1199.2523  | 6768.2653 |
| 303.8735               | -14.8668    | 28.2176    | 680285.8938 | -12.5036  |
| -12.4860               |             |            |             |           |
| [16599]ENERGY: 4780000 | 3208.2657   | 5439.6528  | 5669.9834   |           |
| 345.8501               | -14189.0311 | -1771.0736 | 0.0000      | 0.0000    |
| 8000.5861              | 6704.2334   | 305.0752   | -1296.3527  | 6768.0263 |
| 303.8350               | -22.1254    | -50.6351   | 680285.8938 | -9.8359   |
| -9.8624                |             |            |             |           |
| [16649]ENERGY: 4790000 | 3227.3008   | 5361.6920  | 5780.2216   |           |
| 345.4564               | -14156.9945 | -1834.2981 | 0.0000      | 0.0000    |
| 7978.0858              | 6701.4641   | 304.2173   | -1276.6218  | 6767.2742 |
| 304.0265               | 124.0566    | 77.4988    | 680285.8938 | -10.0008  |
| -9.9990                |             |            |             |           |
| [16688]ENERGY: 4800000 | 3304.5676   | 5452.0318  | 5747.3646   |           |
| 334.2560               | -14303.4671 | -1753.6296 | 0.0000      | 0.0000    |
| 7919.2958              | 6700.4190   | 301.9755   | -1218.8768  | 6766.6899 |
| 303.9588               | -132.0984   | -112.6174  | 680285.8938 | -10.4645  |
| -10.4473               |             |            |             |           |

## Supplementary Text 6

|                        |             |            |             |           |
|------------------------|-------------|------------|-------------|-----------|
| [16738]ENERGY: 4810000 | 3180.5607   | 5454.0862  | 5729.4084   |           |
| 342.1319               | -14267.9871 | -1724.0743 | 0.0000      | 0.0000    |
| 7988.2608              | 6702.3866   | 304.6053   | -1285.8742  | 6767.3011 |
| 304.0234               | -75.6058    | -57.1107   | 680285.8938 | -12.8947  |
| -12.9047               |             |            |             |           |
| [16774]ENERGY: 4820000 | 3248.3232   | 5382.2425  | 5750.1638   |           |
| 349.3663               | -14204.4160 | -1799.4001 | 0.0000      | 0.0000    |
| 7980.2424              | 6706.5222   | 304.2995   | -1273.7202  | 6767.7745 |
| 303.9611               | 43.2705     | 63.1585    | 680285.8938 | -17.5736  |
| -17.5618               |             |            |             |           |
| [16824]ENERGY: 4830000 | 3293.0445   | 5463.5854  | 5687.6986   |           |
| 351.1928               | -14220.6463 | -1892.0204 | 0.0000      | 0.0000    |
| 8018.4525              | 6701.3072   | 305.7565   | -1317.1453  | 6768.5003 |
| 304.0101               | -207.3410   | -170.2634  | 680285.8938 | -18.0873  |
| -18.0973               |             |            |             |           |
| [16860]ENERGY: 4840000 | 3287.1233   | 5408.2015  | 5755.7917   |           |
| 355.7623               | -14238.1910 | -1799.5403 | 0.0000      | 0.0000    |
| 7933.6016              | 6702.7491   | 302.5210   | -1230.8525  | 6768.2276 |
| 303.9776               | 106.1513    | 156.6727   | 680285.8938 | -14.1015  |
| -14.0996               |             |            |             |           |
| [16910]ENERGY: 4850000 | 3272.6819   | 5440.9350  | 5742.5597   |           |
| 337.4877               | -14292.4712 | -1825.4522 | 0.0000      | 0.0000    |
| 8026.0844              | 6701.8254   | 306.0475   | -1324.2591  | 6767.8291 |
| 304.1011               | -47.7488    | -63.1906   | 680285.8938 | -15.5002  |
| -15.4964               |             |            |             |           |
| [16946]ENERGY: 4860000 | 3229.1532   | 5398.2288  | 5755.1844   |           |
| 334.5909               | -14230.9694 | -1815.8141 | 0.0000      | 0.0000    |
| 8030.8995              | 6701.2733   | 306.2311   | -1329.6263  | 6767.8745 |
| 304.3139               | 119.7522    | 71.1038    | 680285.8938 | -13.1916  |
| -13.1837               |             |            |             |           |
| [16996]ENERGY: 4870000 | 3300.2865   | 5330.8144  | 5690.1919   |           |
| 330.4548               | -14106.7051 | -1851.1545 | 0.0000      | 0.0000    |
| 8006.6024              | 6700.4904   | 305.3047   | -1306.1120  | 6767.0672 |
| 304.3694               | -93.3327    | -89.2700   | 680285.8938 | -13.3723  |
| -13.3831               |             |            |             |           |
| [17032]ENERGY: 4880000 | 3160.0121   | 5448.2817  | 5703.4762   |           |
| 360.4703               | -14226.2436 | -1754.4576 | 0.0000      | 0.0000    |
| 8011.0264              | 6702.5655   | 305.4734   | -1308.4609  | 6766.9129 |
| 304.1216               | 108.9469    | 51.9312    | 680285.8938 | -14.2995  |
| -14.3026               |             |            |             |           |
| [17082]ENERGY: 4890000 | 3191.1605   | 5291.6702  | 5764.6225   |           |
| 342.7787               | -14189.5979 | -1762.3907 | 0.0000      | 0.0000    |
| 8065.4221              | 6703.6652   | 307.5476   | -1361.7569  | 6768.6786 |
| 304.2114               | 200.4672    | 77.5935    | 680285.8938 | -12.9775  |
| -12.9863               |             |            |             |           |
| [17121]ENERGY: 4900000 | 3268.9763   | 5320.0724  | 5734.8812   |           |
| 317.7386               | -14109.5571 | -1829.6025 | 0.0000      | 0.0000    |
| 8002.8053              | 6705.3142   | 305.1599   | -1297.4911  | 6768.6873 |
| 304.1832               | 130.0225    | 14.1797    | 680285.8938 | -14.6667  |
| -14.6657               |             |            |             |           |
| [17171]ENERGY: 4910000 | 3295.3800   | 5456.4326  | 5708.9999   |           |
| 369.6413               | -14281.8388 | -1779.3882 | 0.0000      | 0.0000    |
| 7929.7241              | 6698.9509   | 302.3732   | -1230.7732  | 6767.2117 |
| 304.1307               | 46.8093     | -27.5963   | 680285.8938 | -14.0150  |

## Supplementary Text 6

-14.0048  
[17207]ENERGY: 4920000      3229.9223      5426.8905      5685.3260  
357.4397      -14182.0315      -1782.5239      0.0000      0.0000  
7965.8490      6700.8722      303.7507      -1264.9769      6766.8442  
304.0992      41.4004      -23.8775      680285.8938      -10.7716  
-10.7698  
[17257]ENERGY: 4930000      3311.3156      5462.6367      5694.8376  
347.6633      -14252.9274      -1790.5872      0.0000      0.0000  
7932.5375      6705.4761      302.4804      -1227.0613      6768.8605  
304.2659      -58.0986      -30.5537      680285.8938      -16.3168  
-16.3057  
[17293]ENERGY: 4940000      3266.8427      5470.9072      5712.2222  
324.5167      -14188.6359      -1808.4729      0.0000      0.0000  
7929.8790      6707.2589      302.3791      -1222.6201      6770.9284  
304.2608      62.2779      -34.1934      680285.8938      -18.1826  
-18.2138  
[17343]ENERGY: 4950000      3329.1499      5453.8622      5706.0433  
331.3030      -14187.6533      -1846.3034      0.0000      0.0000  
7918.4103      6704.8120      301.9418      -1213.5982      6770.2364  
304.2680      -128.4598      -74.1066      680285.8938      -15.6161  
-15.6007  
[17379]ENERGY: 4960000      3239.7354      5487.5979      5722.6316  
342.3752      -14221.1234      -1822.7432      0.0000      0.0000  
7954.3826      6702.8560      303.3134      -1251.5266      6769.3243  
303.9430      -62.2934      -80.8827      680285.8938      -12.8178  
-12.8163  
[17429]ENERGY: 4970000      3212.5472      5420.5039      5741.9705  
327.8161      -14153.2382      -1845.5122      0.0000      0.0000  
8003.3881      6707.4755      305.1821      -1295.9126      6769.5410  
303.8933      -69.4660      -114.8278      680285.8938      -14.1818  
-14.1865  
[17465]ENERGY: 4980000      3268.6963      5416.1749      5698.5471  
343.9133      -14205.9843      -1844.8938      0.0000      0.0000  
8027.4910      6703.9444      306.1012      -1323.5466      6769.8121  
304.1324      48.5273      8.0129      680285.8938      -12.6882  
-12.6861  
[17515]ENERGY: 4990000      3370.8057      5419.6198      5721.9552  
351.6465      -14315.2898      -1766.1244      0.0000      0.0000  
7921.7910      6704.4039      302.0707      -1217.3871      6768.2879  
304.0891      -82.8188      -69.0566      680285.8938      -13.4485  
-13.4343  
[17554]ENERGY: 5000000      3316.7967      5453.9257      5783.7490  
334.9787      -14355.7714      -1807.9806      0.0000      0.0000  
7973.9744      6699.6725      304.0605      -1274.3019      6769.0730  
304.2121      -83.4338      -64.6575      680285.8938      -12.8661  
-12.8864  
[17604]ENERGY: 5010000      3289.0208      5405.6976      5720.7844  
327.5081      -14186.7065      -1778.4740      0.0000      0.0000  
7927.1905      6705.0209      302.2766      -1222.1696      6769.9634  
304.0905      -29.2042      -34.7870      680285.8938      -15.1342  
-15.1243  
[17640]ENERGY: 5020000      3317.5380      5493.2195      5682.6076  
317.9586      -14252.4379      -1800.9925      0.0000      0.0000  
7948.9353      6706.8285      303.1057      -1242.1068      6770.3944

## Supplementary Text 6

|                        |             |            |             |           |
|------------------------|-------------|------------|-------------|-----------|
| 303.9661               | -39.3797    | -51.8309   | 680285.8938 | -12.0393  |
| -12.0479               |             |            |             |           |
| [17690]ENERGY: 5030000 | 3235.5844   | 5461.6463  | 5735.6715   |           |
| 326.1001               | -14220.1467 | -1822.2656 | 0.0000      | 0.0000    |
| 7988.7469              | 6705.3369   | 304.6238   | -1283.4100  | 6770.2772 |
| 304.1290               | 41.7103     | -26.4263   | 680285.8938 | -8.3874   |
| -8.3808                |             |            |             |           |
| [17726]ENERGY: 5040000 | 3296.5775   | 5538.4184  | 5679.3080   |           |
| 325.0053               | -14269.5669 | -1782.3864 | 0.0000      | 0.0000    |
| 7919.5435              | 6706.8995   | 301.9850   | -1212.6440  | 6771.6788 |
| 304.1066               | 157.2876    | 143.4673   | 680285.8938 | -13.2959  |
| -13.2995               |             |            |             |           |
| [17776]ENERGY: 5050000 | 3263.5418   | 5336.2704  | 5769.6937   |           |
| 318.9173               | -14209.0600 | -1726.5575 | 0.0000      | 0.0000    |
| 7954.3530              | 6707.1586   | 303.3123   | -1247.1943  | 6771.7837 |
| 304.2208               | -4.0252     | 78.4931    | 680285.8938 | -8.6842   |
| -8.6769                |             |            |             |           |
| [17812]ENERGY: 5060000 | 3239.4523   | 5444.9134  | 5738.3220   |           |
| 353.5938               | -14204.3351 | -1843.0769 | 0.0000      | 0.0000    |
| 7977.9065              | 6706.7760   | 304.2104   | -1271.1305  | 6772.9325 |
| 304.1469               | 145.4297    | 24.7561    | 680285.8938 | -13.7126  |
| -13.7221               |             |            |             |           |
| [17862]ENERGY: 5070000 | 3254.9183   | 5451.5966  | 5712.5762   |           |
| 353.9569               | -14129.4947 | -1885.0290 | 0.0000      | 0.0000    |
| 7947.4227              | 6705.9469   | 303.0480   | -1241.4758  | 6772.6581 |
| 304.1984               | 40.1682     | -4.8916    | 680285.8938 | -11.0702  |
| -11.0591               |             |            |             |           |
| [17898]ENERGY: 5080000 | 3301.8809   | 5362.3173  | 5759.1187   |           |
| 337.8153               | -14195.8779 | -1848.2583 | 0.0000      | 0.0000    |
| 7989.1449              | 6706.1409   | 304.6390   | -1283.0041  | 6771.3198 |
| 304.1223               | -90.2265    | -77.6318   | 680285.8938 | -16.3464  |
| -16.3613               |             |            |             |           |
| [17948]ENERGY: 5090000 | 3312.7234   | 5321.5228  | 5677.5391   |           |
| 345.6278               | -14146.1750 | -1789.2150 | 0.0000      | 0.0000    |
| 7988.1206              | 6710.1438   | 304.5999   | -1277.9769  | 6772.4951 |
| 304.2036               | 124.9699    | 100.0942   | 680285.8938 | -11.3405  |
| -11.3409               |             |            |             |           |
| [17987]ENERGY: 5100000 | 3349.1198   | 5386.5116  | 5722.5732   |           |
| 338.7536               | -14173.0470 | -1857.8789 | 0.0000      | 0.0000    |
| 7942.3377              | 6708.3699   | 302.8541   | -1233.9678  | 6772.9577 |
| 304.1702               | -116.9010   | -131.0356  | 680285.8938 | -14.3722  |
| -14.3651               |             |            |             |           |
| [18037]ENERGY: 5110000 | 3281.0597   | 5457.6817  | 5678.1419   |           |
| 350.1578               | -14191.4078 | -1832.9357 | 0.0000      | 0.0000    |
| 7968.0663              | 6710.7639   | 303.8352   | -1257.3024  | 6773.9404 |
| 304.4373               | 106.3408    | -1.8102    | 680285.8938 | -11.1096  |
| -11.0926               |             |            |             |           |
| [18073]ENERGY: 5120000 | 3243.2792   | 5389.2803  | 5776.8861   |           |
| 355.1225               | -14203.8649 | -1814.3828 | 0.0000      | 0.0000    |
| 7960.6456              | 6706.9661   | 303.5523   | -1253.6795  | 6771.9178 |
| 304.2048               | -107.7914   | -71.3285   | 680285.8938 | -15.0968  |
| -15.1116               |             |            |             |           |
| [18123]ENERGY: 5130000 | 3285.1919   | 5431.7293  | 5771.0665   |           |
| 324.1178               | -14221.8836 | -1855.7545 | 0.0000      | 0.0000    |

Supplementary Text 6

|                        |             |            |             |           |
|------------------------|-------------|------------|-------------|-----------|
| 7974.8028              | 6709.2702   | 304.0921   | -1265.5326  | 6774.6000 |
| 304.2152               | 73.1001     | -15.6233   | 680285.8938 | -15.9198  |
| -15.9193               |             |            |             |           |
| [18159]ENERGY: 5140000 | 3261.6572   | 5528.6460  | 5714.1187   |           |
| 335.5962               | -14294.7059 | -1830.3172 | 0.0000      | 0.0000    |
| 7990.9673              | 6705.9623   | 304.7085   | -1285.0049  | 6774.1925 |
| 304.4181               | -25.9916    | 0.5487     | 680285.8938 | -14.4622  |
| -14.4527               |             |            |             |           |
| [18209]ENERGY: 5150000 | 3300.6489   | 5424.0425  | 5716.2836   |           |
| 322.6629               | -14200.5456 | -1823.4686 | 0.0000      | 0.0000    |
| 7967.3795              | 6707.0033   | 303.8090   | -1260.3763  | 6773.2118 |
| 304.2747               | 51.6693     | 8.9056     | 680285.8938 | -15.1274  |
| -15.1245               |             |            |             |           |
| [18245]ENERGY: 5160000 | 3263.3844   | 5396.8983  | 5698.8393   |           |
| 327.4421               | -14255.6999 | -1757.0210 | 0.0000      | 0.0000    |
| 8033.5103              | 6707.3535   | 306.3307   | -1326.1568  | 6774.5717 |
| 304.3716               | 80.0536     | 16.0549    | 680285.8938 | -16.1056  |
| -16.1130               |             |            |             |           |
| [18295]ENERGY: 5170000 | 3279.8766   | 5492.2126  | 5688.8618   |           |
| 327.5259               | -14200.5868 | -1815.8973 | 0.0000      | 0.0000    |
| 7940.0477              | 6712.0406   | 302.7668   | -1228.0072  | 6774.5132 |
| 304.3869               | 27.1714     | -23.2047   | 680285.8938 | -16.8819  |
| -16.8777               |             |            |             |           |
| [18331]ENERGY: 5180000 | 3296.1748   | 5434.4469  | 5716.0798   |           |
| 327.5600               | -14240.5515 | -1767.1491 | 0.0000      | 0.0000    |
| 7944.8507              | 6711.4115   | 302.9500   | -1233.4392  | 6773.7929 |
| 304.1412               | 121.1180    | 81.1874    | 680285.8938 | -14.6414  |
| -14.6449               |             |            |             |           |
| [18381]ENERGY: 5190000 | 3258.8909   | 5483.9712  | 5766.1675   |           |
| 369.4049               | -14216.6377 | -1848.4073 | 0.0000      | 0.0000    |
| 7898.7536              | 6712.1432   | 301.1922   | -1186.6104  | 6774.9604 |
| 304.4182               | 2.2160      | -36.5464   | 680285.8938 | -15.0915  |
| -15.0955               |             |            |             |           |
| [18420]ENERGY: 5200000 | 3264.0963   | 5410.8766  | 5712.7209   |           |
| 360.2979               | -14152.9247 | -1892.3356 | 0.0000      | 0.0000    |
| 8008.5672              | 6711.2987   | 305.3796   | -1297.2685  | 6775.0061 |
| 304.4361               | -132.0025   | -167.6371  | 680285.8938 | -15.1637  |
| -15.1816               |             |            |             |           |
| [18470]ENERGY: 5210000 | 3371.5415   | 5403.7006  | 5692.6184   |           |
| 334.1310               | -14171.8264 | -1839.6744 | 0.0000      | 0.0000    |
| 7922.4830              | 6712.9735   | 302.0971   | -1209.5095  | 6775.3043 |
| 304.3184               | -189.7687   | -157.8501  | 680285.8938 | -14.2645  |
| -14.2464               |             |            |             |           |
| [18506]ENERGY: 5220000 | 3285.2493   | 5381.2270  | 5735.8567   |           |
| 325.3352               | -14101.6200 | -1884.0845 | 0.0000      | 0.0000    |
| 7970.5022              | 6712.4658   | 303.9281   | -1258.0364  | 6775.3555 |
| 304.3791               | -90.7124    | -29.0722   | 680285.8938 | -14.5140  |
| -14.5161               |             |            |             |           |
| [18556]ENERGY: 5230000 | 3273.7027   | 5487.4577  | 5713.0429   |           |
| 340.1038               | -14328.8548 | -1716.4202 | 0.0000      | 0.0000    |
| 7943.1777              | 6712.2098   | 302.8862   | -1230.9679  | 6774.3527 |
| 304.4189               | 35.3880     | 87.6950    | 680285.8938 | -17.5613  |
| -17.5635               |             |            |             |           |
| [18592]ENERGY: 5240000 | 3319.2232   | 5458.6098  | 5751.0176   |           |



Supplementary Text 6

|                        |             |            |             |           |
|------------------------|-------------|------------|-------------|-----------|
| 326.6163               | -14206.4040 | -1883.7766 | 0.0000      | 0.0000    |
| 7949.5693              | 6714.8557   | 303.1299   | -1234.7137  | 6776.8429 |
| 304.5317               | 23.7974     | -30.4296   | 680285.8938 | -15.3276  |
| -15.3256               |             |            |             |           |
| [18642]ENERGY: 5250000 | 3314.8777   | 5401.9716  | 5747.0367   |           |
| 333.0428               | -14271.7319 | -1781.3237 | 0.0000      | 0.0000    |
| 7966.2399              | 6710.1131   | 303.7656   | -1256.1269  | 6775.7353 |
| 304.4288               | -47.2795    | -30.5255   | 680285.8938 | -20.9217  |
| -20.9187               |             |            |             |           |
| [18678]ENERGY: 5260000 | 3200.6349   | 5467.3474  | 5744.9881   |           |
| 317.7197               | -14242.3246 | -1810.5107 | 0.0000      | 0.0000    |
| 8028.1420              | 6705.9967   | 306.1260   | -1322.1453  | 6775.3816 |
| 304.5078               | -31.6122    | -42.5002   | 680285.8938 | -20.5924  |
| -20.6004               |             |            |             |           |
| [18728]ENERGY: 5270000 | 3237.9677   | 5437.2927  | 5767.5503   |           |
| 342.6503               | -14266.1117 | -1794.5125 | 0.0000      | 0.0000    |
| 7985.6547              | 6710.4916   | 304.5059   | -1275.1631  | 6776.5562 |
| 304.5564               | 128.4559    | 72.7079    | 680285.8938 | -16.9833  |
| -16.9851               |             |            |             |           |
| [18764]ENERGY: 5280000 | 3291.0420   | 5411.9370  | 5679.2639   |           |
| 320.1729               | -14143.4466 | -1822.7909 | 0.0000      | 0.0000    |
| 7978.1334              | 6714.3117   | 304.2191   | -1263.8217  | 6775.9363 |
| 304.5913               | 11.4539     | -13.7056   | 680285.8938 | -16.2381  |
| -16.2280               |             |            |             |           |
| [18814]ENERGY: 5290000 | 3279.9311   | 5508.4498  | 5732.9044   |           |
| 334.3252               | -14197.1976 | -1834.4440 | 0.0000      | 0.0000    |
| 7891.5847              | 6715.5536   | 300.9188   | -1176.0311  | 6776.9619 |
| 304.4986               | 2.6817      | -9.7268    | 680285.8938 | -16.5588  |
| -16.5495               |             |            |             |           |
| [18853]ENERGY: 5300000 | 3251.6544   | 5442.5711  | 5704.1070   |           |
| 339.5949               | -14269.4008 | -1754.7059 | 0.0000      | 0.0000    |
| 7995.3958              | 6709.2166   | 304.8773   | -1286.1792  | 6776.4954 |
| 304.5634               | 18.2213     | -4.1991    | 680285.8938 | -15.8492  |
| -15.8611               |             |            |             |           |
| [18903]ENERGY: 5310000 | 3251.9385   | 5421.7772  | 5756.2110   |           |
| 311.5193               | -14218.2385 | -1801.3422 | 0.0000      | 0.0000    |
| 7991.0876              | 6712.9529   | 304.7131   | -1278.1347  | 6777.0043 |
| 304.4837               | 87.0808     | 55.0746    | 680285.8938 | -14.5644  |
| -14.5636               |             |            |             |           |
| [18939]ENERGY: 5320000 | 3332.7415   | 5363.9903  | 5741.3897   |           |
| 337.7688               | -14257.9429 | -1791.9940 | 0.0000      | 0.0000    |
| 7986.7392              | 6712.6927   | 304.5472   | -1274.0465  | 6776.3264 |
| 304.4119               | -99.8989    | 9.0502     | 680285.8938 | -15.0865  |
| -15.0728               |             |            |             |           |
| [18989]ENERGY: 5330000 | 3281.3387   | 5463.3251  | 5726.7456   |           |
| 351.2263               | -14280.7937 | -1856.3901 | 0.0000      | 0.0000    |
| 8028.7060              | 6714.1578   | 306.1475   | -1314.5481  | 6776.7777 |
| 304.4618               | -28.1458    | -46.0384   | 680285.8938 | -16.1112  |
| -16.1370               |             |            |             |           |
| [19025]ENERGY: 5340000 | 3310.7968   | 5386.8651  | 5725.2162   |           |
| 324.4885               | -14128.5590 | -1908.4513 | 0.0000      | 0.0000    |
| 7999.2428              | 6709.5991   | 305.0240   | -1289.6437  | 6777.1648 |
| 304.6241               | -245.0045   | -249.9489  | 680285.8938 | -15.4832  |
| -15.4801               |             |            |             |           |

## Supplementary Text 6

|                        |             |            |             |           |
|------------------------|-------------|------------|-------------|-----------|
| [19075]ENERGY: 5350000 | 3223.6116   | 5457.0463  | 5690.1504   |           |
| 333.8830               | -14228.6032 | -1699.4958 | 0.0000      | 0.0000    |
| 7940.6860              | 6717.2783   | 302.7912   | -1223.4077  | 6777.5180 |
| 304.3122               | 117.5763    | 35.2505    | 680285.8938 | -16.7347  |
| -16.7361               |             |            |             |           |
| [19111]ENERGY: 5360000 | 3265.2646   | 5493.4264  | 5735.7948   |           |
| 351.7074               | -14260.2044 | -1841.7502 | 0.0000      | 0.0000    |
| 7969.3270              | 6713.5657   | 303.8833   | -1255.7613  | 6780.0723 |
| 304.2828               | 11.3976     | -41.8205   | 680285.8938 | -15.7677  |
| -15.7551               |             |            |             |           |
| [19161]ENERGY: 5370000 | 3376.0802   | 5376.3403  | 5687.7548   |           |
| 321.5037               | -14228.8779 | -1850.4967 | 0.0000      | 0.0000    |
| 8031.0748              | 6713.3791   | 306.2378   | -1317.6956  | 6780.1202 |
| 304.3408               | -90.1237    | -103.8343  | 680285.8938 | -8.9793   |
| -8.9629                |             |            |             |           |
| [19197]ENERGY: 5380000 | 3266.8138   | 5442.7340  | 5722.3481   |           |
| 327.2356               | -14243.5237 | -1802.4163 | 0.0000      | 0.0000    |
| 8000.9013              | 6714.0928   | 305.0873   | -1286.8085  | 6779.2231 |
| 304.3572               | 69.5289     | -6.1089    | 680285.8938 | -18.7337  |
| -18.7574               |             |            |             |           |
| [19247]ENERGY: 5390000 | 3238.1981   | 5434.4047  | 5751.1104   |           |
| 340.7741               | -14143.1023 | -1920.7862 | 0.0000      | 0.0000    |
| 8014.4424              | 6715.0412   | 305.6036   | -1299.4012  | 6780.3280 |
| 304.5662               | -19.2294    | -47.6470   | 680285.8938 | -11.7864  |
| -11.7830               |             |            |             |           |
| [19286]ENERGY: 5400000 | 3281.0201   | 5521.0522  | 5720.7201   |           |
| 335.6585               | -14308.1732 | -1781.8251 | 0.0000      | 0.0000    |
| 7948.8195              | 6717.2721   | 303.1013   | -1231.5474  | 6780.2339 |
| 304.3995               | 173.0326    | 66.8971    | 680285.8938 | -13.5391  |
| -13.5304               |             |            |             |           |
| [19336]ENERGY: 5410000 | 3321.2001   | 5550.8413  | 5744.3258   |           |
| 351.3104               | -14265.0497 | -1831.0958 | 0.0000      | 0.0000    |
| 7846.5335              | 6718.0657   | 299.2010   | -1128.4678  | 6780.0666 |
| 304.4656               | -84.1798    | -81.1386   | 680285.8938 | -12.8032  |
| -12.7945               |             |            |             |           |
| [19372]ENERGY: 5420000 | 3269.6395   | 5386.3796  | 5702.8303   |           |
| 328.2839               | -14164.7900 | -1785.1305 | 0.0000      | 0.0000    |
| 7980.7037              | 6717.9165   | 304.3171   | -1262.7871  | 6780.0159 |
| 304.4666               | 152.0175    | 124.4078   | 680285.8938 | -11.7606  |
| -11.7787               |             |            |             |           |
| [19422]ENERGY: 5430000 | 3297.1791   | 5472.3600  | 5743.8917   |           |
| 339.0650               | -14197.8864 | -1828.4723 | 0.0000      | 0.0000    |
| 7891.9240              | 6718.0611   | 300.9318   | -1173.8629  | 6781.5144 |
| 304.3705               | -43.2117    | -68.6920   | 680285.8938 | -12.1746  |
| -12.1814               |             |            |             |           |
| [19458]ENERGY: 5440000 | 3310.2972   | 5401.9696  | 5677.8548   |           |
| 333.2882               | -14217.4607 | -1821.8140 | 0.0000      | 0.0000    |
| 8033.4201              | 6717.5553   | 306.3273   | -1315.8648  | 6781.4148 |
| 304.4397               | -19.7089    | -48.5912   | 680285.8938 | -11.0213  |
| -11.0053               |             |            |             |           |
| [19508]ENERGY: 5450000 | 3237.6458   | 5437.8967  | 5728.2002   |           |
| 362.3297               | -14201.9823 | -1838.8947 | 0.0000      | 0.0000    |
| 7993.1844              | 6718.3796   | 304.7930   | -1274.8047  | 6781.3793 |
| 304.5842               | 48.0475     | -30.3364   | 680285.8938 | -8.4363   |

Supplementary Text 6

-8.4388  
 [19544]ENERGY: 5460000      3267.2645      5494.8988      5681.7376  
 319.0099      -14253.7350      -1796.6321      0.0000      0.0000  
 8005.4828      6718.0265      305.2620      -1287.4563      6780.8311  
 304.6238      96.0920      83.9173      680285.8938      -12.7154  
 -12.7295  
 [19594]ENERGY: 5470000      3343.8732      5439.9929      5733.1219  
 328.2310      -14284.0349      -1807.3863      0.0000      0.0000  
 7962.5545      6716.3523      303.6250      -1246.2023      6781.9849  
 304.6267      127.0316      137.4205      680285.8938      -9.8801  
 -9.8622  
 [19630]ENERGY: 5480000      3255.8179      5390.3981      5765.0210  
 333.4783      -14228.0794      -1775.4180      0.0000      0.0000  
 7975.8857      6717.1035      304.1334      -1258.7821      6782.1232  
 304.6394      4.5175      -19.6215      680285.8938      -13.5003  
 -13.5128  
 [19680]ENERGY: 5490000      3248.3751      5522.4787      5689.5534  
 336.8648      -14318.6477      -1718.0849      0.0000      0.0000  
 7957.4663      6718.0057      303.4310      -1239.4607      6782.3891  
 304.7719      41.1621      81.3977      680285.8938      -13.2612  
 -13.2637  
 [19719]ENERGY: 5500000      3330.0661      5430.3889      5752.3560  
 340.0750      -14315.5060      -1774.7292      0.0000      0.0000  
 7955.2094      6717.8603      303.3450      -1237.3491      6782.9859  
 304.7755      39.8499      -5.2739      680285.8938      -16.2160  
 -16.2075  
 [19769]ENERGY: 5510000      3267.4575      5472.7607      5741.5410  
 339.9000      -14260.9887      -1824.0221      0.0000      0.0000  
 7984.4723      6721.1207      304.4608      -1263.3516      6783.5168  
 304.8050      -26.2845      -91.3864      680285.8938      -14.2076  
 -14.2129  
 [19805]ENERGY: 5520000      3315.5470      5479.6087      5667.3796  
 319.0729      -14177.5200      -1826.4915      0.0000      0.0000  
 7944.3944      6721.9911      302.9326      -1222.4032      6783.5286  
 304.7714      -51.6259      -49.6027      680285.8938      -15.6531  
 -15.6475  
 [19855]ENERGY: 5530000      3375.3325      5351.7888      5696.1014  
 335.3263      -14217.7962      -1787.8454      0.0000      0.0000  
 7968.0079      6720.9152      303.8330      -1247.0927      6783.3428  
 304.6536      130.2882      76.1452      680285.8938      -11.7832  
 -11.7845  
 [19891]ENERGY: 5540000      3359.3778      5498.4709      5739.5610  
 340.7697      -14304.9073      -1813.1609      0.0000      0.0000  
 7900.0010      6720.1122      301.2398      -1179.8888      6783.1656  
 304.5465      -130.7609      -10.5448      680285.8938      -15.2193  
 -15.2233  
 [19941]ENERGY: 5550000      3245.5954      5360.4950      5768.7382  
 349.0015      -14259.9639      -1801.1519      0.0000      0.0000  
 8056.5305      6719.2447      307.2085      -1337.2858      6783.6971  
 304.7283      70.4914      19.1828      680285.8938      -17.9640  
 -17.9550  
 [19977]ENERGY: 5560000      3278.5224      5536.8987      5780.6100  
 352.0793      -14327.6997      -1859.1146      0.0000      0.0000  
 7955.0155      6716.3117      303.3376      -1238.7039      6784.0083

Supplementary Text 6

|                        |             |            |             |           |
|------------------------|-------------|------------|-------------|-----------|
| 304.7498               | -134.6850   | -143.1351  | 680285.8938 | -18.3087  |
| -18.3086               |             |            |             |           |
| [20027]ENERGY: 5570000 | 3238.8496   | 5471.2325  | 5757.8711   |           |
| 326.8149               | -14318.2985 | -1769.4314 | 0.0000      | 0.0000    |
| 8012.0675              | 6719.1057   | 305.5131   | -1292.9618  | 6784.5727 |
| 304.8776               | -50.7983    | -20.2228   | 680285.8938 | -12.3167  |
| -12.3185               |             |            |             |           |
| [20063]ENERGY: 5580000 | 3313.8542   | 5373.0942  | 5700.3450   |           |
| 342.8407               | -14300.2526 | -1782.6506 | 0.0000      | 0.0000    |
| 8069.1897              | 6716.4206   | 307.6912   | -1352.7691  | 6783.7114 |
| 304.7615               | 55.1760     | -4.2022    | 680285.8938 | -15.6490  |
| -15.6596               |             |            |             |           |
| [20113]ENERGY: 5590000 | 3329.8235   | 5409.3746  | 5745.2797   |           |
| 350.6149               | -14266.4394 | -1826.5658 | 0.0000      | 0.0000    |
| 7979.5193              | 6721.6067   | 304.2719   | -1257.9126  | 6784.7437 |
| 304.8210               | 104.8022    | 21.9776    | 680285.8938 | -14.4223  |
| -14.4322               |             |            |             |           |
| [20152]ENERGY: 5600000 | 3318.6237   | 5400.3120  | 5736.2695   |           |
| 330.2245               | -14287.8115 | -1790.9146 | 0.0000      | 0.0000    |
| 8012.7764              | 6719.4800   | 305.5401   | -1293.2964  | 6784.2650 |
| 304.9373               | -31.1006    | -82.5984   | 680285.8938 | -10.1901  |
| -10.1766               |             |            |             |           |
| [20202]ENERGY: 5610000 | 3314.0792   | 5487.7659  | 5738.4651   |           |
| 340.5804               | -14294.8454 | -1832.5140 | 0.0000      | 0.0000    |
| 7966.5383              | 6720.0696   | 303.7770   | -1246.4687  | 6784.5910 |
| 305.0154               | -138.2785   | -160.2527  | 680285.8938 | -9.9579   |
| -9.9456                |             |            |             |           |
| [20238]ENERGY: 5620000 | 3288.4560   | 5548.6419  | 5681.6601   |           |
| 332.7200               | -14309.2199 | -1812.8660 | 0.0000      | 0.0000    |
| 7991.3049              | 6720.6969   | 304.7213   | -1270.6080  | 6785.6737 |
| 305.0411               | 116.9259    | -7.1634    | 680285.8938 | -9.5609   |
| -9.5807                |             |            |             |           |
| [20288]ENERGY: 5630000 | 3341.1260   | 5386.6445  | 5751.5944   |           |
| 308.1212               | -14166.2037 | -1827.4962 | 0.0000      | 0.0000    |
| 7929.8736              | 6723.6597   | 302.3789   | -1206.2139  | 6785.5705 |
| 304.9770               | -194.5882   | -65.2418   | 680285.8938 | -16.2554  |
| -16.2235               |             |            |             |           |
| [20324]ENERGY: 5640000 | 3310.3651   | 5525.1083  | 5703.1527   |           |
| 352.9092               | -14300.7413 | -1845.9351 | 0.0000      | 0.0000    |
| 7971.3506              | 6716.2095   | 303.9605   | -1255.1411  | 6785.9513 |
| 304.9510               | -36.6371    | 9.7996     | 680285.8938 | -12.6001  |
| -12.5978               |             |            |             |           |
| [20374]ENERGY: 5650000 | 3326.7397   | 5476.9120  | 5734.3887   |           |
| 329.1487               | -14291.2485 | -1816.2824 | 0.0000      | 0.0000    |
| 7963.3840              | 6723.0421   | 303.6567   | -1240.3419  | 6785.8825 |
| 305.1004               | -53.8632    | -59.7785   | 680285.8938 | -12.4074  |
| -12.4410               |             |            |             |           |
| [20410]ENERGY: 5660000 | 3293.2850   | 5455.7541  | 5761.0394   |           |
| 336.5422               | -14209.9992 | -1820.0235 | 0.0000      | 0.0000    |
| 7905.2386              | 6721.8367   | 301.4395   | -1183.4020  | 6786.1306 |
| 304.8845               | 17.5743     | 17.0684    | 680285.8938 | -13.4492  |
| -13.4383               |             |            |             |           |
| [20460]ENERGY: 5670000 | 3332.7008   | 5489.6672  | 5737.4765   |           |
| 329.4794               | -14211.8929 | -1838.3248 | 0.0000      | 0.0000    |

## Supplementary Text 6

|                        |             |            |             |           |
|------------------------|-------------|------------|-------------|-----------|
| 7885.2035              | 6724.3097   | 300.6755   | -1160.8937  | 6786.7568 |
| 304.6552               | -28.7440    | -34.2149   | 680285.8938 | -18.0412  |
| -18.0265               |             |            |             |           |
| [20496]ENERGY: 5680000 | 3262.7427   | 5464.7662  | 5702.5645   |           |
| 331.6652               | -14250.8126 | -1849.6672 | 0.0000      | 0.0000    |
| 8055.5443              | 6716.8030   | 307.1709   | -1338.7412  | 6786.3435 |
| 304.6683               | -130.3824   | -108.7906  | 680285.8938 | -15.5254  |
| -15.5416               |             |            |             |           |
| [20546]ENERGY: 5690000 | 3360.6565   | 5410.1167  | 5733.5659   |           |
| 361.7513               | -14352.8155 | -1775.0710 | 0.0000      | 0.0000    |
| 7986.9801              | 6725.1839   | 304.5564   | -1261.7962  | 6785.8148 |
| 304.5840               | 31.4936     | -70.5995   | 680285.8938 | -14.5874  |
| -14.5973               |             |            |             |           |
| [20585]ENERGY: 5700000 | 3309.4968   | 5390.2868  | 5711.8071   |           |
| 353.5286               | -14201.2571 | -1786.7958 | 0.0000      | 0.0000    |
| 7945.5306              | 6722.5970   | 302.9759   | -1222.9336  | 6786.6111 |
| 304.6722               | -128.2405   | -32.2491   | 680285.8938 | -11.3100  |
| -11.2843               |             |            |             |           |
| [20635]ENERGY: 5710000 | 3300.4284   | 5476.1944  | 5715.8791   |           |
| 337.8863               | -14294.3210 | -1829.0887 | 0.0000      | 0.0000    |
| 8015.1504              | 6722.1288   | 305.6306   | -1293.0216  | 6785.7927 |
| 304.7748               | -145.0238   | -122.0475  | 680285.8938 | -16.9940  |
| -17.0059               |             |            |             |           |
| [20671]ENERGY: 5720000 | 3194.5169   | 5485.5864  | 5707.3926   |           |
| 349.5839               | -14191.9209 | -1832.1778 | 0.0000      | 0.0000    |
| 8005.7025              | 6718.6836   | 305.2703   | -1287.0189  | 6786.5592 |
| 304.7890               | 19.1695     | 27.0950    | 680285.8938 | -9.4588   |
| -9.4598                |             |            |             |           |
| [20721]ENERGY: 5730000 | 3370.0458   | 5432.8331  | 5701.1777   |           |
| 321.6506               | -14271.6353 | -1849.9853 | 0.0000      | 0.0000    |
| 8020.9926              | 6725.0792   | 305.8534   | -1295.9134  | 6788.9564 |
| 304.7647               | -126.0716   | -122.8959  | 680285.8938 | -18.8396  |
| -18.8439               |             |            |             |           |
| [20757]ENERGY: 5740000 | 3318.0447   | 5482.0563  | 5738.0427   |           |
| 352.4317               | -14289.4285 | -1895.5062 | 0.0000      | 0.0000    |
| 8019.6432              | 6725.2837   | 305.8019   | -1294.3594  | 6790.4330 |
| 304.9668               | 103.2145    | 57.3633    | 680285.8938 | -15.2454  |
| -15.2572               |             |            |             |           |
| [20807]ENERGY: 5750000 | 3299.4279   | 5470.1448  | 5770.3128   |           |
| 348.2713               | -14361.6438 | -1852.1332 | 0.0000      | 0.0000    |
| 8049.6117              | 6723.9915   | 306.9447   | -1325.6202  | 6789.8022 |
| 305.0304               | 75.2631     | 1.1555     | 680285.8938 | -15.6727  |
| -15.6614               |             |            |             |           |
| [20843]ENERGY: 5760000 | 3271.4054   | 5440.5236  | 5768.2474   |           |
| 332.8815               | -14258.7579 | -1860.6906 | 0.0000      | 0.0000    |
| 8031.0960              | 6724.7054   | 306.2386   | -1306.3906  | 6788.4885 |
| 305.1797               | -57.4675    | -63.9296   | 680285.8938 | -12.2081  |
| -12.1937               |             |            |             |           |
| [20893]ENERGY: 5770000 | 3377.9488   | 5343.1084  | 5716.3720   |           |
| 348.0742               | -14238.5616 | -1802.5519 | 0.0000      | 0.0000    |
| 7984.2224              | 6728.6122   | 304.4513   | -1255.6102  | 6789.7093 |
| 305.1021               | 187.9335    | 84.1672    | 680285.8938 | -12.3500  |
| -12.3552               |             |            |             |           |
| [20929]ENERGY: 5780000 | 3280.2794   | 5552.5463  | 5771.8375   |           |

## Supplementary Text 6

|                        |             |            |             |           |
|------------------------|-------------|------------|-------------|-----------|
| 345.9695               | -14338.6912 | -1855.4876 | 0.0000      | 0.0000    |
| 7970.9210              | 6727.3748   | 303.9441   | -1243.5461  | 6790.9546 |
| 305.0884               | -8.0503     | -17.2053   | 680285.8938 | -9.1780   |
| -9.1759                |             |            |             |           |
| [20979]ENERGY: 5790000 | 3195.2873   | 5387.8397  | 5757.0364   |           |
| 339.1610               | -14157.0599 | -1886.9488 | 0.0000      | 0.0000    |
| 8090.3816              | 6725.6972   | 308.4993   | -1364.6844  | 6790.3920 |
| 305.0767               | 11.3388     | 35.9125    | 680285.8938 | -13.5622  |
| -13.5692               |             |            |             |           |
| [21018]ENERGY: 5800000 | 3231.5178   | 5442.5278  | 5715.0636   |           |
| 346.7546               | -14184.1190 | -1863.0676 | 0.0000      | 0.0000    |
| 8038.0970              | 6726.7741   | 306.5056   | -1311.3228  | 6790.1589 |
| 305.3668               | 109.5214    | 27.9411    | 680285.8938 | -12.1999  |
| -12.1971               |             |            |             |           |
| [21068]ENERGY: 5810000 | 3344.4412   | 5535.6836  | 5688.2574   |           |
| 328.5797               | -14267.7238 | -1855.9988 | 0.0000      | 0.0000    |
| 7952.4443              | 6725.6836   | 303.2395   | -1226.7608  | 6791.3837 |
| 305.4216               | 45.3258     | 55.9209    | 680285.8938 | -13.9554  |
| -13.9531               |             |            |             |           |
| [21104]ENERGY: 5820000 | 3292.5422   | 5492.2206  | 5764.8051   |           |
| 322.0928               | -14276.1716 | -1772.6423 | 0.0000      | 0.0000    |
| 7904.7032              | 6727.5500   | 301.4191   | -1177.1532  | 6791.2242 |
| 305.4058               | 142.3498    | 57.4153    | 680285.8938 | -13.3667  |
| -13.3684               |             |            |             |           |
| [21154]ENERGY: 5830000 | 3295.6955   | 5454.1865  | 5721.2916   |           |
| 342.8522               | -14244.9710 | -1831.9045 | 0.0000      | 0.0000    |
| 7989.6403              | 6726.7905   | 304.6579   | -1262.8497  | 6791.1294 |
| 305.3847               | -3.3615     | -65.8529   | 680285.8938 | -9.5915   |
| -9.6020                |             |            |             |           |
| [21190]ENERGY: 5840000 | 3243.6922   | 5464.0108  | 5742.9567   |           |
| 323.6036               | -14304.6693 | -1759.3104 | 0.0000      | 0.0000    |
| 8015.5019              | 6725.7856   | 305.6440   | -1289.7164  | 6792.0768 |
| 305.2200               | 0.7037      | 1.3814     | 680285.8938 | -15.0506  |
| -15.0477               |             |            |             |           |
| [21240]ENERGY: 5850000 | 3259.8947   | 5463.3772  | 5657.7929   |           |
| 346.9533               | -14248.9138 | -1792.1099 | 0.0000      | 0.0000    |
| 8037.4345              | 6724.4291   | 306.4803   | -1313.0055  | 6792.1570 |
| 305.3070               | 139.6408    | 148.0179   | 680285.8938 | -19.5623  |
| -19.5413               |             |            |             |           |
| [21276]ENERGY: 5860000 | 3236.7613   | 5374.0153  | 5731.2700   |           |
| 340.5493               | -14265.5468 | -1765.5166 | 0.0000      | 0.0000    |
| 8077.9699              | 6729.5024   | 308.0260   | -1348.4675  | 6792.5925 |
| 305.4706               | 87.8365     | 101.4354   | 680285.8938 | -9.7778   |
| -9.7960                |             |            |             |           |
| [21326]ENERGY: 5870000 | 3205.3574   | 5465.8297  | 5742.8309   |           |
| 356.3285               | -14267.3958 | -1813.1983 | 0.0000      | 0.0000    |
| 8040.1568              | 6729.9093   | 306.5841   | -1310.2475  | 6793.3641 |
| 305.3611               | 239.6148    | 188.1138   | 680285.8938 | -15.8357  |
| -15.8165               |             |            |             |           |
| [21362]ENERGY: 5880000 | 3244.5668   | 5355.1510  | 5760.2113   |           |
| 337.7494               | -14271.4774 | -1733.5560 | 0.0000      | 0.0000    |
| 8035.6442              | 6728.2894   | 306.4121   | -1307.3548  | 6793.2792 |
| 305.4137               | 24.8337     | 6.8882     | 680285.8938 | -11.6360  |
| -11.6409               |             |            |             |           |

## Supplementary Text 6

|                        |             |            |             |           |
|------------------------|-------------|------------|-------------|-----------|
| [21412]ENERGY: 5890000 | 3303.0628   | 5400.9516  | 5720.8993   |           |
| 332.8722               | -14263.2159 | -1821.5919 | 0.0000      | 0.0000    |
| 8059.0951              | 6732.0732   | 307.3063   | -1327.0219  | 6794.3043 |
| 305.3100               | -46.5663    | -32.3131   | 680285.8938 | -10.1531  |
| -10.1710               |             |            |             |           |
| [21451]ENERGY: 5900000 | 3331.2498   | 5434.9181  | 5707.9898   |           |
| 333.5626               | -14265.7421 | -1834.2252 | 0.0000      | 0.0000    |
| 8018.3901              | 6726.1432   | 305.7541   | -1292.2469  | 6793.2468 |
| 305.2495               | 140.3180    | 139.2217   | 680285.8938 | -8.4226   |
| -8.4109                |             |            |             |           |
| [21501]ENERGY: 5910000 | 3293.6472   | 5565.5312  | 5703.5412   |           |
| 343.8890               | -14335.3656 | -1813.0071 | 0.0000      | 0.0000    |
| 7971.6674              | 6729.9031   | 303.9725   | -1241.7643  | 6793.8405 |
| 305.4148               | 43.8719     | 13.1113    | 680285.8938 | -13.7780  |
| -13.7908               |             |            |             |           |
| [21537]ENERGY: 5920000 | 3331.6434   | 5412.3602  | 5711.1307   |           |
| 349.9557               | -14195.4317 | -1805.6251 | 0.0000      | 0.0000    |
| 7929.6242              | 6733.6572   | 302.3694   | -1195.9670  | 6794.6045 |
| 305.3884               | 107.7796    | 67.2222    | 680285.8938 | -11.6772  |
| -11.6782               |             |            |             |           |
| [21587]ENERGY: 5930000 | 3214.3642   | 5573.5439  | 5726.2887   |           |
| 317.0203               | -14336.4369 | -1836.8969 | 0.0000      | 0.0000    |
| 8070.3267              | 6728.2099   | 307.7346   | -1342.1168  | 6793.8830 |
| 305.6053               | -16.7055    | 3.2389     | 680285.8938 | -13.1654  |
| -13.1402               |             |            |             |           |
| [21623]ENERGY: 5940000 | 3328.9818   | 5412.3554  | 5674.5758   |           |
| 328.2862               | -14261.8738 | -1806.7825 | 0.0000      | 0.0000    |
| 8053.2267              | 6728.7696   | 307.0825   | -1324.4571  | 6794.1769 |
| 305.6794               | 133.3877    | 76.5724    | 680285.8938 | -13.1651  |
| -13.1806               |             |            |             |           |
| [21673]ENERGY: 5950000 | 3293.3894   | 5442.6882  | 5699.1072   |           |
| 333.6907               | -14200.6701 | -1814.3729 | 0.0000      | 0.0000    |
| 7977.4175              | 6731.2501   | 304.1918   | -1246.1674  | 6795.1522 |
| 305.6685               | -22.8228    | 0.3717     | 680285.8938 | -14.0652  |
| -14.0700               |             |            |             |           |
| [21709]ENERGY: 5960000 | 3304.6716   | 5437.7626  | 5728.3469   |           |
| 329.9355               | -14320.7857 | -1818.1424 | 0.0000      | 0.0000    |
| 8068.6129              | 6730.4014   | 307.6692   | -1338.2115  | 6794.7341 |
| 305.6656               | -94.8825    | -89.5917   | 680285.8938 | -10.6767  |
| -10.6849               |             |            |             |           |
| [21759]ENERGY: 5970000 | 3378.6103   | 5436.1085  | 5715.6870   |           |
| 349.6439               | -14319.6368 | -1796.4243 | 0.0000      | 0.0000    |
| 7971.0247              | 6735.0133   | 303.9480   | -1236.0114  | 6795.8887 |
| 305.7599               | -23.6546    | 12.0248    | 680285.8938 | -10.4118  |
| -10.4131               |             |            |             |           |
| [21795]ENERGY: 5980000 | 3283.9000   | 5341.4026  | 5747.0893   |           |
| 317.4734               | -14247.7022 | -1781.7251 | 0.0000      | 0.0000    |
| 8070.1944              | 6730.6324   | 307.7295   | -1339.5620  | 6795.4747 |
| 305.7023               | 128.2101    | 31.5155    | 680285.8938 | -11.1018  |
| -11.1012               |             |            |             |           |
| [21845]ENERGY: 5990000 | 3328.3782   | 5368.7224  | 5723.5009   |           |
| 314.4497               | -14215.9161 | -1817.5503 | 0.0000      | 0.0000    |
| 8029.8711              | 6731.4559   | 306.1919   | -1298.4152  | 6796.2975 |
| 305.5705               | -12.3951    | -38.0204   | 680285.8938 | -15.6143  |

Supplementary Text 6

-15.6132  
 [21884]ENERGY: 6000000 3267.0205 5407.6350 5741.2131  
 328.4195 -14161.2594 -1802.7680 0.0000 0.0000  
 7950.7907 6731.0515 303.1765 -1219.7393 6796.1214  
 305.3300 -86.1474 -67.1391 680285.8938 -10.8120  
 -10.8191  
 [21934]ENERGY: 6010000 3268.0784 5513.2212 5662.1939  
 330.4218 -14226.6816 -1756.9922 0.0000 0.0000  
 7945.6949 6735.9364 302.9822 -1209.7585 6797.5456  
 305.6182 135.7156 21.2826 680285.8938 -11.6571  
 -11.6555  
 [21970]ENERGY: 6020000 3294.1237 5397.4853 5727.6972  
 345.4872 -14255.6470 -1807.8873 0.0000 0.0000  
 8030.9400 6732.1991 306.2327 -1298.7409 6798.3995  
 305.5072 210.0864 136.8275 680285.8938 -15.1787  
 -15.1574  
 [22020]ENERGY: 6030000 3181.0972 5404.2132 5714.3535  
 328.9826 -14120.3116 -1827.7174 0.0000 0.0000  
 8050.4206 6731.0381 306.9755 -1319.3825 6796.3191  
 305.4880 236.2480 200.3982 680285.8938 -10.1349  
 -10.1571  
 [22056]ENERGY: 6040000 3303.5236 5396.6894 5716.1377  
 334.6958 -14278.7236 -1833.2255 0.0000 0.0000  
 8090.4119 6729.5093 308.5005 -1360.9026 6796.5942  
 305.3694 112.0975 -79.5643 680285.8938 -11.9824  
 -11.9536  
 [22106]ENERGY: 6050000 3311.3555 5445.2400 5704.2605  
 334.5922 -14252.5213 -1783.1555 0.0000 0.0000  
 7973.5894 6733.3608 304.0458 -1240.2286 6796.9688  
 305.2583 126.3987 40.8558 680285.8938 -17.8592  
 -17.8667  
 [22142]ENERGY: 6060000 3316.8957 5413.8758 5688.9058  
 318.6937 -14200.9596 -1816.5671 0.0000 0.0000  
 8013.1293 6733.9735 305.5535 -1279.1558 6796.0069  
 305.3717 21.4461 9.4296 680285.8938 -13.2931  
 -13.3042  
 [22192]ENERGY: 6070000 3251.6985 5560.1480 5693.7836  
 349.6780 -14344.0376 -1747.2392 0.0000 0.0000  
 7966.5344 6730.5658 303.7768 -1235.9687 6797.5911  
 305.3972 61.7455 31.3395 680285.8938 -8.1504  
 -8.1551  
 [22228]ENERGY: 6080000 3293.4552 5399.1374 5758.5885  
 345.1242 -14299.6847 -1740.0734 0.0000 0.0000  
 7974.7785 6731.3257 304.0912 -1243.4528 6796.9030  
 305.4966 -38.6561 -28.6369 680285.8938 -11.4652  
 -11.4641  
 [22278]ENERGY: 6090000 3210.0476 5511.3545 5735.2519  
 336.4810 -14117.4272 -1861.3548 0.0000 0.0000  
 7919.7998 6734.1528 301.9947 -1185.6470 6796.7614  
 305.4394 -100.0734 -114.7663 680285.8938 -9.3161  
 -9.3061  
 [22317]ENERGY: 6100000 3344.4095 5382.5286 5716.8726  
 323.4208 -14155.6593 -1803.2466 0.0000 0.0000  
 7926.1907 6734.5162 302.2384 -1191.6745 6797.5183



## Supplementary Text 6

|                        |             |            |             |           |
|------------------------|-------------|------------|-------------|-----------|
| 305.4761               | 26.2546     | -31.2021   | 680285.8938 | -13.5453  |
| -13.5368               |             |            |             |           |
| [22367]ENERGY: 6110000 | 3373.6560   | 5426.8456  | 5688.2387   |           |
| 353.7767               | -14302.5429 | -1817.4170 | 0.0000      | 0.0000    |
| 8010.3567              | 6732.9138   | 305.4478   | -1277.4429  | 6798.6285 |
| 305.3043               | -37.4957    | -53.5473   | 680285.8938 | -16.3540  |
| -16.3647               |             |            |             |           |
| [22403]ENERGY: 6120000 | 3246.2206   | 5499.6069  | 5690.2607   |           |
| 321.5646               | -14189.4378 | -1833.5078 | 0.0000      | 0.0000    |
| 7997.0692              | 6731.7765   | 304.9411   | -1265.2927  | 6797.6175 |
| 305.5269               | 98.3143     | 66.6666    | 680285.8938 | -14.7665  |
| -14.7648               |             |            |             |           |
| [22453]ENERGY: 6130000 | 3301.4417   | 5452.6983  | 5690.9037   |           |
| 322.4369               | -14261.8626 | -1807.3469 | 0.0000      | 0.0000    |
| 8035.4189              | 6733.6900   | 306.4035   | -1301.7290  | 6798.3516 |
| 305.6443               | -53.9521    | -64.7205   | 680285.8938 | -14.2306  |
| -14.2187               |             |            |             |           |
| [22489]ENERGY: 6140000 | 3258.1225   | 5589.7403  | 5677.0973   |           |
| 341.4940               | -14308.6112 | -1774.5782 | 0.0000      | 0.0000    |
| 7951.3689              | 6734.6334   | 303.1985   | -1216.7355  | 6798.6660 |
| 305.5830               | 65.4322     | 33.8223    | 680285.8938 | -11.2485  |
| -11.2597               |             |            |             |           |
| [22539]ENERGY: 6150000 | 3318.2655   | 5476.4229  | 5722.2947   |           |
| 324.7706               | -14264.7498 | -1814.6762 | 0.0000      | 0.0000    |
| 7971.2732              | 6733.6008   | 303.9575   | -1237.6724  | 6798.5999 |
| 305.6889               | 78.2501     | 16.9881    | 680285.8938 | -14.5208  |
| -14.5271               |             |            |             |           |
| [22575]ENERGY: 6160000 | 3306.8825   | 5446.8338  | 5715.3970   |           |
| 333.0688               | -14320.9119 | -1772.3130 | 0.0000      | 0.0000    |
| 8023.4143              | 6732.3714   | 305.9457   | -1291.0429  | 6798.2272 |
| 305.6373               | 71.2603     | 17.8556    | 680285.8938 | -11.9459  |
| -11.9427               |             |            |             |           |
| [22625]ENERGY: 6170000 | 3400.6373   | 5440.4140  | 5725.9343   |           |
| 335.0374               | -14290.9608 | -1831.9648 | 0.0000      | 0.0000    |
| 7951.0670              | 6730.1644   | 303.1870   | -1220.9026  | 6798.1091 |
| 305.8422               | -131.0103   | -106.5070  | 680285.8938 | -7.7728   |
| -7.7750                |             |            |             |           |
| [22661]ENERGY: 6180000 | 3300.5682   | 5418.0999  | 5672.5323   |           |
| 334.7945               | -14224.2264 | -1838.1532 | 0.0000      | 0.0000    |
| 8070.5432              | 6734.1584   | 307.7428   | -1336.3848  | 6798.4291 |
| 305.8233               | 28.5034     | -18.0146   | 680285.8938 | -10.6546  |
| -10.6448               |             |            |             |           |
| [22711]ENERGY: 6190000 | 3294.4757   | 5488.9293  | 5733.9874   |           |
| 315.2489               | -14272.9341 | -1710.5938 | 0.0000      | 0.0000    |
| 7888.8033              | 6737.9168   | 300.8128   | -1150.8866  | 6799.2133 |
| 305.7474               | 175.6833    | 78.2681    | 680285.8938 | -8.2384   |
| -8.2474                |             |            |             |           |
| [22750]ENERGY: 6200000 | 3288.0020   | 5424.0128  | 5793.4439   |           |
| 350.8587               | -14293.8458 | -1808.8963 | 0.0000      | 0.0000    |
| 7979.6155              | 6733.1910   | 304.2756   | -1246.4246  | 6797.8768 |
| 306.0403               | -17.6665    | -28.8381   | 680285.8938 | -8.6593   |
| -8.6372                |             |            |             |           |
| [22800]ENERGY: 6210000 | 3278.1212   | 5504.0910  | 5703.1823   |           |
| 359.4933               | -14343.7550 | -1714.5678 | 0.0000      | 0.0000    |

Supplementary Text 6

|                        |             |            |             |           |
|------------------------|-------------|------------|-------------|-----------|
| 7949.1126              | 6735.6776   | 303.1125   | -1213.4350  | 6799.1332 |
| 306.1454               | 86.2596     | 16.7690    | 680285.8938 | -7.4301   |
| -7.4533                |             |            |             |           |
| [22836]ENERGY: 6220000 | 3252.8211   | 5471.7577  | 5678.6413   |           |
| 322.3966               | -14252.7423 | -1841.9024 | 0.0000      | 0.0000    |
| 8105.4825              | 6736.4545   | 309.0751   | -1369.0280  | 6800.1388 |
| 306.0592               | 30.8245     | -32.3672   | 680285.8938 | -11.0055  |
| -10.9972               |             |            |             |           |
| [22886]ENERGY: 6230000 | 3254.5624   | 5471.2881  | 5684.8904   |           |
| 337.2828               | -14234.5989 | -1842.0540 | 0.0000      | 0.0000    |
| 8063.3313              | 6734.7022   | 307.4678   | -1328.6291  | 6799.6244 |
| 306.0420               | -69.1189    | -8.1232    | 680285.8938 | -8.8311   |
| -8.8265                |             |            |             |           |
| [22922]ENERGY: 6240000 | 3361.8474   | 5438.2862  | 5696.9714   |           |
| 362.9552               | -14226.9091 | -1844.8998 | 0.0000      | 0.0000    |
| 7949.3691              | 6737.6204   | 303.1223   | -1211.7487  | 6801.0683 |
| 306.0652               | 79.2793     | -5.2868    | 680285.8938 | -6.8610   |
| -6.8635                |             |            |             |           |
| [22972]ENERGY: 6250000 | 3418.3298   | 5463.0685  | 5606.5780   |           |
| 327.1896               | -14317.1801 | -1747.4021 | 0.0000      | 0.0000    |
| 7985.6756              | 6736.2593   | 304.5067   | -1249.4163  | 6801.2049 |
| 306.0240               | 74.6329     | 19.7340    | 680285.8938 | -3.8673   |
| -3.8845                |             |            |             |           |
| [23008]ENERGY: 6260000 | 3255.9135   | 5300.3522  | 5701.2892   |           |
| 315.7577               | -14204.4126 | -1730.4713 | 0.0000      | 0.0000    |
| 8097.4286              | 6735.8573   | 308.7680   | -1361.5713  | 6801.3260 |
| 305.7640               | 1.7369      | -24.8197   | 680285.8938 | -8.8356   |
| -8.8205                |             |            |             |           |
| [23058]ENERGY: 6270000 | 3248.4480   | 5460.0355  | 5754.8398   |           |
| 349.4679               | -14223.7880 | -1861.8936 | 0.0000      | 0.0000    |
| 8011.9207              | 6739.0303   | 305.5075   | -1272.8904  | 6803.4936 |
| 305.8212               | 88.2113     | 26.2014    | 680285.8938 | -10.0424  |
| -10.0563               |             |            |             |           |
| [23094]ENERGY: 6280000 | 3299.4899   | 5396.6287  | 5681.2976   |           |
| 341.9095               | -14185.5507 | -1785.3601 | 0.0000      | 0.0000    |
| 7987.1080              | 6735.5227   | 304.5613   | -1251.5853  | 6802.4325 |
| 306.0066               | -38.6016    | -77.5081   | 680285.8938 | -11.7207  |
| -11.7241               |             |            |             |           |
| [23144]ENERGY: 6290000 | 3397.8661   | 5454.6495  | 5720.1700   |           |
| 329.1192               | -14359.0097 | -1794.9291 | 0.0000      | 0.0000    |
| 7989.8222              | 6737.6883   | 304.6648   | -1252.1340  | 6800.4580 |
| 305.8011               | -56.2427    | -64.2043   | 680285.8938 | -12.8644  |
| -12.8602               |             |            |             |           |
| [23183]ENERGY: 6300000 | 3319.0241   | 5428.4513  | 5732.7461   |           |
| 364.3074               | -14328.3428 | -1801.7859 | 0.0000      | 0.0000    |
| 8020.9239              | 6735.3240   | 305.8508   | -1285.5999  | 6802.0362 |
| 306.2714               | 108.0819    | 81.9932    | 680285.8938 | -11.6608  |
| -11.6423               |             |            |             |           |
| [23233]ENERGY: 6310000 | 3284.3192   | 5429.8110  | 5718.2993   |           |
| 374.9141               | -14228.6614 | -1868.4248 | 0.0000      | 0.0000    |
| 8026.0601              | 6736.3175   | 306.0466   | -1289.7426  | 6801.8265 |
| 306.1120               | 136.3633    | 120.7742   | 680285.8938 | -16.9361  |
| -16.9444               |             |            |             |           |
| [23269]ENERGY: 6320000 | 3287.5657   | 5441.0218  | 5728.2679   |           |

## Supplementary Text 6

|                        |             |            |             |           |
|------------------------|-------------|------------|-------------|-----------|
| 340.2755               | -14267.6430 | -1874.6986 | 0.0000      | 0.0000    |
| 8082.8284              | 6737.6178   | 308.2113   | -1345.2106  | 6802.8212 |
| 305.9943               | -94.2000    | -110.9926  | 680285.8938 | -15.5438  |
| -15.5340               |             |            |             |           |
| [23319]ENERGY: 6330000 | 3300.3247   | 5381.2160  | 5701.7777   |           |
| 331.9516               | -14214.0798 | -1869.1948 | 0.0000      | 0.0000    |
| 8102.7747              | 6734.7700   | 308.9719   | -1368.0047  | 6801.7638 |
| 306.1651               | -59.7789    | -13.6902   | 680285.8938 | -13.1591  |
| -13.1543               |             |            |             |           |
| [23355]ENERGY: 6340000 | 3291.2112   | 5446.0468  | 5707.9580   |           |
| 336.3269               | -14344.1897 | -1744.1450 | 0.0000      | 0.0000    |
| 8040.5756              | 6733.7839   | 306.6001   | -1306.7918  | 6802.7292 |
| 306.0524               | -28.2767    | -76.8579   | 680285.8938 | -12.3758  |
| -12.3849               |             |            |             |           |
| [23405]ENERGY: 6350000 | 3300.8702   | 5455.9495  | 5671.0783   |           |
| 362.4655               | -14232.3283 | -1813.5399 | 0.0000      | 0.0000    |
| 7993.0193              | 6737.5146   | 304.7867   | -1255.5047  | 6803.0642 |
| 306.1383               | -21.8315    | -57.0726   | 680285.8938 | -12.7521  |
| -12.7634               |             |            |             |           |
| [23441]ENERGY: 6360000 | 3343.6187   | 5368.0914  | 5649.7969   |           |
| 329.2220               | -14198.6457 | -1835.6702 | 0.0000      | 0.0000    |
| 8079.6530              | 6736.0661   | 308.0902   | -1343.5869  | 6802.3641 |
| 306.1477               | -100.6380   | -78.2544   | 680285.8938 | -11.7405  |
| -11.7384               |             |            |             |           |
| [23491]ENERGY: 6370000 | 3367.1301   | 5494.1833  | 5712.2544   |           |
| 329.3328               | -14284.1886 | -1862.1568 | 0.0000      | 0.0000    |
| 7983.2133              | 6739.7685   | 304.4128   | -1243.4448  | 6803.5910 |
| 306.0633               | -3.4296     | 3.7292     | 680285.8938 | -15.2753  |
| -15.2783               |             |            |             |           |
| [23527]ENERGY: 6380000 | 3315.8071   | 5500.1989  | 5726.2072   |           |
| 352.8041               | -14345.4505 | -1825.3167 | 0.0000      | 0.0000    |
| 8016.0552              | 6740.3053   | 305.6651   | -1275.7499  | 6803.0299 |
| 306.1221               | -180.8532   | -130.2917  | 680285.8938 | -10.6315  |
| -10.6120               |             |            |             |           |
| [23577]ENERGY: 6390000 | 3336.6794   | 5423.7974  | 5760.2179   |           |
| 357.9815               | -14315.2081 | -1861.4342 | 0.0000      | 0.0000    |
| 8036.0478              | 6738.0817   | 306.4275   | -1297.9661  | 6802.3778 |
| 305.9920               | -11.3891    | -83.0677   | 680285.8938 | -10.3675  |
| -10.3976               |             |            |             |           |
| [23616]ENERGY: 6400000 | 3350.5985   | 5550.2066  | 5731.6912   |           |
| 323.7695               | -14316.6089 | -1911.3661 | 0.0000      | 0.0000    |
| 8007.5354              | 6735.8262   | 305.3402   | -1271.7092  | 6802.8259 |
| 305.8504               | -160.4361   | -68.4899   | 680285.8938 | -16.2913  |
| -16.2575               |             |            |             |           |
| [23666]ENERGY: 6410000 | 3247.1689   | 5521.2654  | 5754.5417   |           |
| 333.3902               | -14303.3135 | -1852.2638 | 0.0000      | 0.0000    |
| 8035.6529              | 6736.4419   | 306.4124   | -1299.2111  | 6803.6723 |
| 305.7013               | 99.9359     | 92.1609    | 680285.8938 | -19.1341  |
| -19.1692               |             |            |             |           |
| [23702]ENERGY: 6420000 | 3314.6121   | 5499.5009  | 5721.9393   |           |
| 343.9166               | -14328.8889 | -1840.3556 | 0.0000      | 0.0000    |
| 8028.8788              | 6739.6032   | 306.1541   | -1289.2756  | 6803.1174 |
| 305.9125               | 75.3126     | -1.5429    | 680285.8938 | -12.8803  |
| -12.8635               |             |            |             |           |

## Supplementary Text 6

|                        |             |            |             |           |
|------------------------|-------------|------------|-------------|-----------|
| [23752]ENERGY: 6430000 | 3327.3799   | 5447.7885  | 5748.7734   |           |
| 357.7833               | -14287.5615 | -1814.7972 | 0.0000      | 0.0000    |
| 7959.6611              | 6739.0274   | 303.5147   | -1220.6337  | 6802.2896 |
| 305.9931               | 69.5237     | 5.3498     | 680285.8938 | -13.4468  |
| -13.4338               |             |            |             |           |
| [23788]ENERGY: 6440000 | 3294.0591   | 5327.1250  | 5648.5334   |           |
| 298.9905               | -14192.0235 | -1804.7728 | 0.0000      | 0.0000    |
| 8160.9415              | 6732.8531   | 311.1899   | -1428.0884  | 6801.9129 |
| 305.8395               | -9.2388     | 6.9947     | 680285.8938 | -19.7114  |
| -19.7265               |             |            |             |           |
| [23838]ENERGY: 6450000 | 3333.1671   | 5485.1984  | 5728.3827   |           |
| 318.6264               | -14280.7438 | -1820.2707 | 0.0000      | 0.0000    |
| 7974.6626              | 6739.0227   | 304.0867   | -1235.6399  | 6802.8452 |
| 305.9028               | 87.4057     | 35.7639    | 680285.8938 | -17.2018  |
| -17.1937               |             |            |             |           |
| [23874]ENERGY: 6460000 | 3255.3849   | 5418.8501  | 5701.6404   |           |
| 352.4700               | -14341.4193 | -1751.7117 | 0.0000      | 0.0000    |
| 8099.9050              | 6735.1193   | 308.8624   | -1364.7857  | 6803.1928 |
| 306.0357               | -28.8634    | -36.2831   | 680285.8938 | -18.6351  |
| -18.6528               |             |            |             |           |
| [23924]ENERGY: 6470000 | 3334.6693   | 5430.9363  | 5750.7978   |           |
| 336.6538               | -14184.1217 | -1904.1386 | 0.0000      | 0.0000    |
| 7975.8476              | 6740.6446   | 304.1319   | -1235.2030  | 6804.1551 |
| 305.9404               | -115.4886   | -135.9166  | 680285.8938 | -14.9875  |
| -14.9927               |             |            |             |           |
| [23960]ENERGY: 6480000 | 3267.8380   | 5469.2586  | 5668.5848   |           |
| 342.6496               | -14248.0351 | -1775.3917 | 0.0000      | 0.0000    |
| 8015.6228              | 6740.5269   | 305.6486   | -1275.0959  | 6803.7965 |
| 305.8200               | -56.1353    | 32.0512    | 680285.8938 | -19.5838  |
| -19.5566               |             |            |             |           |
| [24010]ENERGY: 6490000 | 3318.3032   | 5473.1759  | 5747.0562   |           |
| 345.0284               | -14337.7826 | -1770.2764 | 0.0000      | 0.0000    |
| 7961.6010              | 6737.1057   | 303.5887   | -1224.4953  | 6803.3282 |
| 305.9405               | 37.3100     | 26.6228    | 680285.8938 | -16.4258  |
| -16.4389               |             |            |             |           |
| [24049]ENERGY: 6500000 | 3320.4939   | 5426.5214  | 5732.2709   |           |
| 345.6163               | -14264.8066 | -1779.4291 | 0.0000      | 0.0000    |
| 7958.6141              | 6739.2808   | 303.4748   | -1219.3333  | 6803.7619 |
| 305.8200               | 90.6657     | 58.0120    | 680285.8938 | -15.3941  |
| -15.3909               |             |            |             |           |
| [24099]ENERGY: 6510000 | 3254.0034   | 5423.8705  | 5721.0153   |           |
| 347.6913               | -14314.7371 | -1798.8376 | 0.0000      | 0.0000    |
| 8103.7933              | 6736.7992   | 309.0107   | -1366.9941  | 6802.8224 |
| 305.8377               | -9.6766     | -73.0892   | 680285.8938 | -15.9593  |
| -15.9806               |             |            |             |           |
| [24135]ENERGY: 6520000 | 3292.6340   | 5366.0397  | 5729.4145   |           |
| 343.7440               | -14225.2553 | -1808.8441 | 0.0000      | 0.0000    |
| 8038.6588              | 6736.3914   | 306.5270   | -1302.2673  | 6803.5479 |
| 305.8841               | -40.1980    | -18.9093   | 680285.8938 | -11.9457  |
| -11.9214               |             |            |             |           |
| [24185]ENERGY: 6530000 | 3297.6419   | 5520.9814  | 5705.8752   |           |
| 334.3667               | -14258.9935 | -1851.4046 | 0.0000      | 0.0000    |
| 7993.6455              | 6742.1126   | 304.8106   | -1251.5330  | 6802.7283 |
| 305.9808               | 24.0714     | -8.8310    | 680285.8938 | -13.5638  |

Supplementary Text 6

-13.5626  
 [24221]ENERGY: 6540000      3258.7190      5426.3960      5686.0751  
 360.7291      -14249.9926      -1773.9154      0.0000      0.0000  
 8033.9442      6741.9553      306.3472      -1291.9889      6803.4517  
 306.2508      11.8485      -0.9607      680285.8938      -16.6461  
 -16.6550  
 [24271]ENERGY: 6550000      3207.4406      5497.1143      5687.2969  
 361.5028      -14274.6913      -1825.5396      0.0000      0.0000  
 8084.1611      6737.2849      308.2621      -1346.8763      6803.5786  
 306.1654      88.8609      63.0708      680285.8938      -14.1446  
 -14.1291  
 [24307]ENERGY: 6560000      3283.8094      5491.5706      5708.5513  
 353.2482      -14306.1023      -1865.8492      0.0000      0.0000  
 8068.4433      6733.6713      307.6628      -1334.7720      6803.2635  
 306.0838      -141.6667      -42.6650      680285.8938      -18.8226  
 -18.8121  
 [24357]ENERGY: 6570000      3350.7631      5490.3510      5672.6806  
 332.8220      -14254.1495      -1815.1016      0.0000      0.0000  
 7964.7198      6742.0853      303.7076      -1222.6344      6804.8406  
 306.2494      -73.8615      -73.6156      680285.8938      -13.6115  
 -13.6290  
 [24393]ENERGY: 6580000      3309.3311      5496.6080      5740.3468  
 352.4177      -14246.9996      -1866.3293      0.0000      0.0000  
 7953.9918      6739.3665      303.2985      -1214.6253      6803.7210  
 306.3427      -18.8048      -27.1537      680285.8938      -13.5031  
 -13.4962  
 [24443]ENERGY: 6590000      3357.6212      5409.6616      5698.1406  
 324.2975      -14201.3150      -1817.6345      0.0000      0.0000  
 7970.0012      6740.7727      303.9090      -1229.2285      6802.8620  
 306.3348      -61.3174      -49.7040      680285.8938      -15.0585  
 -15.0657  
 [24482]ENERGY: 6600000      3377.0044      5485.7011      5714.3109  
 341.3308      -14418.5714      -1834.8463      0.0000      0.0000  
 8072.7250      6737.6547      307.8260      -1335.0704      6804.0190  
 306.2615      133.2667      56.9373      680285.8938      -12.6071  
 -12.5971  
 [24532]ENERGY: 6610000      3347.0414      5469.9929      5674.4331  
 323.5585      -14256.3535      -1849.7622      0.0000      0.0000  
 8031.2827      6740.1929      306.2458      -1291.0898      6804.4381  
 306.4305      -8.0459      -21.5720      680285.8938      -12.3580  
 -12.3596  
 [24568]ENERGY: 6620000      3283.9428      5561.3121      5710.8499  
 300.8329      -14234.9747      -1913.1826      0.0000      0.0000  
 8031.6235      6740.4040      306.2588      -1291.2195      6805.6575  
 306.2161      -19.1993      -21.6948      680285.8938      -13.3558  
 -13.3514  
 [24618]ENERGY: 6630000      3254.0589      5355.7009      5697.3628  
 334.4602      -14201.6804      -1894.3003      0.0000      0.0000  
 8191.7552      6737.3573      312.3648      -1454.3980      6804.8109  
 306.3799      -125.0716      -192.2820      680285.8938      -12.7962  
 -12.8184  
 [24654]ENERGY: 6640000      3333.6452      5396.2756      5697.3292  
 352.7124      -14279.0395      -1827.0036      0.0000      0.0000  
 8062.5997      6736.5190      307.4399      -1326.0808      6805.0321

## Supplementary Text 6

|                        |             |            |             |           |
|------------------------|-------------|------------|-------------|-----------|
| 306.2522               | -93.6396    | -105.9790  | 680285.8938 | -13.9507  |
| -13.9528               |             |            |             |           |
| [24704]ENERGY: 6650000 | 3259.1650   | 5465.2266  | 5686.7066   |           |
| 331.0538               | -14257.8151 | -1726.8311 | 0.0000      | 0.0000    |
| 7981.8746              | 6739.3805   | 304.3618   | -1242.4942  | 6805.1260 |
| 306.0941               | 116.7811    | 86.5845    | 680285.8938 | -14.4009  |
| -14.4043               |             |            |             |           |
| [24740]ENERGY: 6660000 | 3284.4356   | 5557.7893  | 5704.5213   |           |
| 343.0901               | -14305.1668 | -1818.4957 | 0.0000      | 0.0000    |
| 7972.7417              | 6738.9156   | 304.0135   | -1233.8261  | 6804.9287 |
| 305.9569               | 88.3392     | -10.4453   | 680285.8938 | -14.8539  |
| -14.8598               |             |            |             |           |
| [24790]ENERGY: 6670000 | 3336.8716   | 5527.1828  | 5665.7548   |           |
| 324.6971               | -14284.7499 | -1860.6848 | 0.0000      | 0.0000    |
| 8029.0485              | 6738.1203   | 306.1606   | -1290.9283  | 6805.5820 |
| 306.0550               | 26.8017     | 54.5761    | 680285.8938 | -14.6603  |
| -14.6302               |             |            |             |           |
| [24826]ENERGY: 6680000 | 3254.0850   | 5385.1087  | 5692.2426   |           |
| 333.0035               | -14200.7988 | -1831.2784 | 0.0000      | 0.0000    |
| 8108.2269              | 6740.5894   | 309.1798   | -1367.6375  | 6805.8634 |
| 305.9097               | 0.9370      | -1.7318    | 680285.8938 | -15.5999  |
| -15.6126               |             |            |             |           |
| [24876]ENERGY: 6690000 | 3396.3383   | 5449.9281  | 5689.6000   |           |
| 333.1055               | -14280.7164 | -1763.0162 | 0.0000      | 0.0000    |
| 7920.9810              | 6746.2203   | 302.0398   | -1174.7607  | 6806.5042 |
| 306.1996               | -54.8423    | -63.3925   | 680285.8938 | -9.4706   |
| -9.4576                |             |            |             |           |
| [24915]ENERGY: 6700000 | 3305.6212   | 5319.5673  | 5733.9805   |           |
| 334.2469               | -14269.3332 | -1730.6425 | 0.0000      | 0.0000    |
| 8050.7564              | 6744.1967   | 306.9883   | -1306.5598  | 6807.8711 |
| 306.3169               | 258.2193    | 89.4731    | 680285.8938 | -14.4147  |
| -14.4224               |             |            |             |           |
| [24965]ENERGY: 6710000 | 3294.9155   | 5438.7434  | 5713.6072   |           |
| 327.7746               | -14299.2571 | -1779.1426 | 0.0000      | 0.0000    |
| 8045.1311              | 6741.7720   | 306.7738   | -1303.3591  | 6807.7004 |
| 306.3019               | -73.5925    | -89.8108   | 680285.8938 | -14.0751  |
| -14.0843               |             |            |             |           |
| [25001]ENERGY: 6720000 | 3303.1824   | 5426.5033  | 5726.1171   |           |
| 342.4455               | -14210.5744 | -1877.5558 | 0.0000      | 0.0000    |
| 8034.7748              | 6744.8928   | 306.3789   | -1289.8820  | 6808.0908 |
| 306.0404               | 67.4529     | 37.6265    | 680285.8938 | -9.3267   |
| -9.3110                |             |            |             |           |
| [25051]ENERGY: 6730000 | 3390.1249   | 5459.0785  | 5644.1274   |           |
| 311.4298               | -14250.7579 | -1794.4475 | 0.0000      | 0.0000    |
| 7983.7595              | 6743.3147   | 304.4336   | -1240.4449  | 6807.6349 |
| 306.3010               | -44.0651    | -26.1170   | 680285.8938 | -12.0298  |
| -12.0448               |             |            |             |           |
| [25087]ENERGY: 6740000 | 3338.7814   | 5423.8440  | 5754.1329   |           |
| 374.0536               | -14229.8036 | -1883.0538 | 0.0000      | 0.0000    |
| 7968.2412              | 6746.1957   | 303.8419   | -1222.0455  | 6808.3880 |
| 306.4127               | 7.2081      | -10.7928   | 680285.8938 | -14.6615  |
| -14.6490               |             |            |             |           |
| [25137]ENERGY: 6750000 | 3319.8042   | 5407.2374  | 5719.8063   |           |
| 329.6018               | -14270.0479 | -1799.0371 | 0.0000      | 0.0000    |

## Supplementary Text 6

|                        |             |            |             |           |
|------------------------|-------------|------------|-------------|-----------|
| 8036.2208              | 6743.5857   | 306.4341   | -1292.6352  | 6809.4137 |
| 306.4110               | -3.7403     | 15.0635    | 680285.8938 | -9.5917   |
| -9.6025                |             |            |             |           |
| [25173]ENERGY: 6760000 | 3399.5605   | 5410.1159  | 5745.9106   |           |
| 342.3587               | -14360.2341 | -1737.6073 | 0.0000      | 0.0000    |
| 7946.8424              | 6746.9468   | 303.0259   | -1199.8957  | 6810.4961 |
| 306.3791               | 95.6410     | 39.1435    | 680285.8938 | -13.6008  |
| -13.5887               |             |            |             |           |
| [25223]ENERGY: 6770000 | 3344.3436   | 5486.0136  | 5729.1001   |           |
| 339.3046               | -14328.6602 | -1846.9414 | 0.0000      | 0.0000    |
| 8022.0437              | 6745.2040   | 305.8935   | -1276.8397  | 6809.8541 |
| 306.1998               | -10.0290    | -40.0352   | 680285.8938 | -12.9656  |
| -12.9834               |             |            |             |           |
| [25259]ENERGY: 6780000 | 3244.1211   | 5584.5906  | 5721.7904   |           |
| 321.0310               | -14252.8344 | -1822.8110 | 0.0000      | 0.0000    |
| 7950.5331              | 6746.4209   | 303.1666   | -1204.1122  | 6811.1019 |
| 306.3933               | 229.4470    | 151.6046   | 680285.8938 | -15.1333  |
| -15.1184               |             |            |             |           |
| [25309]ENERGY: 6790000 | 3306.9545   | 5534.9060  | 5711.6147   |           |
| 351.5630               | -14242.3343 | -1920.2792 | 0.0000      | 0.0000    |
| 8003.7436              | 6746.1683   | 305.1957   | -1257.5753  | 6812.2923 |
| 306.2551               | -100.0125   | -138.9291  | 680285.8938 | -13.0364  |
| -13.0447               |             |            |             |           |
| [25348]ENERGY: 6800000 | 3343.0096   | 5402.0851  | 5677.3459   |           |
| 312.9293               | -14287.2627 | -1766.5080 | 0.0000      | 0.0000    |
| 8063.4562              | 6745.0554   | 307.4726   | -1318.4008  | 6810.1309 |
| 306.3201               | 127.2151    | 113.6911   | 680285.8938 | -13.4540  |
| -13.4406               |             |            |             |           |
| [25398]ENERGY: 6810000 | 3304.0254   | 5512.0311  | 5715.0712   |           |
| 319.5011               | -14270.3927 | -1805.2722 | 0.0000      | 0.0000    |
| 7973.9325              | 6748.8963   | 304.0589   | -1225.0361  | 6811.6478 |
| 306.4332               | 17.2773     | 26.9924    | 680285.8938 | -15.7584  |
| -15.7754               |             |            |             |           |
| [25434]ENERGY: 6820000 | 3261.3227   | 5379.0804  | 5749.0523   |           |
| 356.8055               | -14273.7110 | -1733.3437 | 0.0000      | 0.0000    |
| 8007.4606              | 6746.6668   | 305.3374   | -1260.7939  | 6811.1941 |
| 306.2560               | 89.4367     | 51.3952    | 680285.8938 | -11.6190  |
| -11.6196               |             |            |             |           |
| [25484]ENERGY: 6830000 | 3275.5877   | 5436.8285  | 5742.7590   |           |
| 350.0688               | -14342.3379 | -1734.4586 | 0.0000      | 0.0000    |
| 8018.4850              | 6746.9326   | 305.7578   | -1271.5524  | 6811.4851 |
| 306.1873               | 70.4174     | 13.0879    | 680285.8938 | -13.8630  |
| -13.8660               |             |            |             |           |
| [25520]ENERGY: 6840000 | 3271.3252   | 5463.7297  | 5702.7016   |           |
| 328.1100               | -14338.2740 | -1720.2501 | 0.0000      | 0.0000    |
| 8036.6768              | 6744.0190   | 306.4514   | -1292.6578  | 6811.9672 |
| 306.1017               | 17.8139     | 28.2708    | 680285.8938 | -13.5622  |
| -13.5608               |             |            |             |           |
| [25570]ENERGY: 6850000 | 3263.2589   | 5488.8400  | 5717.9585   |           |
| 346.3614               | -14321.6022 | -1781.9930 | 0.0000      | 0.0000    |
| 8033.7794              | 6746.6031   | 306.3410   | -1287.1764  | 6812.9065 |
| 306.3194               | 89.4141     | 63.7877    | 680285.8938 | -13.8183  |
| -13.8164               |             |            |             |           |
| [25606]ENERGY: 6860000 | 3342.4764   | 5532.4302  | 5774.2828   |           |

## Supplementary Text 6

|                        |             |            |             |           |
|------------------------|-------------|------------|-------------|-----------|
| 352.9581               | -14282.3341 | -1895.9822 | 0.0000      | 0.0000    |
| 7927.5617              | 6751.3929   | 302.2907   | -1176.1687  | 6815.3486 |
| 306.1937               | -58.4090    | -97.9747   | 680285.8938 | -12.8544  |
| -12.8516               |             |            |             |           |
| [25656]ENERGY: 6870000 | 3240.7498   | 5462.5767  | 5724.0935   |           |
| 331.7667               | -14176.1894 | -1883.8548 | 0.0000      | 0.0000    |
| 8051.2422              | 6750.3846   | 307.0068   | -1300.8576  | 6813.3194 |
| 306.4074               | 139.5975    | 114.5771   | 680285.8938 | -10.9234  |
| -10.9202               |             |            |             |           |
| [25692]ENERGY: 6880000 | 3322.1694   | 5486.8445  | 5751.1783   |           |
| 326.8131               | -14281.0696 | -1846.1009 | 0.0000      | 0.0000    |
| 7989.1133              | 6748.9481   | 304.6378   | -1240.1652  | 6812.0290 |
| 306.5048               | -14.5917    | 13.2412    | 680285.8938 | -17.0566  |
| -17.0634               |             |            |             |           |
| [25742]ENERGY: 6890000 | 3282.1058   | 5467.3238  | 5741.8682   |           |
| 350.8496               | -14230.7327 | -1879.8375 | 0.0000      | 0.0000    |
| 8016.0405              | 6747.6177   | 305.6646   | -1268.4228  | 6812.7623 |
| 306.5713               | -23.2400    | -17.1755   | 680285.8938 | -9.9526   |
| -9.9543                |             |            |             |           |
| [25781]ENERGY: 6900000 | 3348.4098   | 5366.7030  | 5741.5834   |           |
| 336.6788               | -14300.3251 | -1814.1549 | 0.0000      | 0.0000    |
| 8068.4783              | 6747.3732   | 307.6641   | -1321.1051  | 6812.6139 |
| 306.2888               | -27.1378    | -43.6274   | 680285.8938 | -10.5785  |
| -10.5710               |             |            |             |           |
| [25831]ENERGY: 6910000 | 3341.0218   | 5472.7318  | 5721.3090   |           |
| 345.3482               | -14244.6192 | -1856.5250 | 0.0000      | 0.0000    |
| 7971.0646              | 6750.3312   | 303.9495   | -1220.7334  | 6812.6615 |
| 306.3995               | 79.3714     | 34.5939    | 680285.8938 | -14.7204  |
| -14.7112               |             |            |             |           |
| [25867]ENERGY: 6920000 | 3291.0712   | 5505.1331  | 5715.3013   |           |
| 318.2482               | -14238.3044 | -1847.8594 | 0.0000      | 0.0000    |
| 8004.4185              | 6748.0085   | 305.2214   | -1256.4100  | 6811.6438 |
| 306.3874               | -42.7036    | -31.0238   | 680285.8938 | -14.2414  |
| -14.2476               |             |            |             |           |
| [25917]ENERGY: 6930000 | 3318.8507   | 5440.2292  | 5674.9986   |           |
| 349.2429               | -14215.6143 | -1859.0739 | 0.0000      | 0.0000    |
| 8038.4886              | 6747.1217   | 306.5205   | -1291.3669  | 6811.9537 |
| 306.5138               | 201.0567    | 125.3710   | 680285.8938 | -13.0540  |
| -13.0478               |             |            |             |           |
| [25953]ENERGY: 6940000 | 3345.8780   | 5355.2801  | 5731.2175   |           |
| 338.5049               | -14267.6371 | -1785.6162 | 0.0000      | 0.0000    |
| 8030.8930              | 6748.5202   | 306.2309   | -1282.3727  | 6811.7478 |
| 306.6000               | -4.7731     | -22.7308   | 680285.8938 | -16.8462  |
| -16.8303               |             |            |             |           |
| [26003]ENERGY: 6950000 | 3340.8839   | 5365.9746  | 5766.3256   |           |
| 341.7559               | -14182.3257 | -1848.9814 | 0.0000      | 0.0000    |
| 7967.3228              | 6750.9558   | 303.8069   | -1216.3671  | 6812.0662 |
| 306.6488               | -37.6263    | -49.6674   | 680285.8938 | -12.2298  |
| -12.2580               |             |            |             |           |
| [26039]ENERGY: 6960000 | 3307.0234   | 5486.4186  | 5737.5132   |           |
| 341.4928               | -14275.4667 | -1820.7397 | 0.0000      | 0.0000    |
| 7973.0513              | 6749.2929   | 304.0253   | -1223.7584  | 6811.8401 |
| 306.7167               | -123.1602   | -7.7181    | 680285.8938 | -13.3857  |
| -13.3533               |             |            |             |           |



Supplementary Text 6

|                        |             |            |             |           |
|------------------------|-------------|------------|-------------|-----------|
| [26089]ENERGY: 6970000 | 3308.2002   | 5392.9331  | 5700.0292   |           |
| 349.1254               | -14271.6222 | -1788.6629 | 0.0000      | 0.0000    |
| 8056.0469              | 6746.0498   | 307.1901   | -1309.9971  | 6812.0304 |
| 306.5744               | 35.0742     | 54.6281    | 680285.8938 | -14.9075  |
| -14.9426               |             |            |             |           |
| [26125]ENERGY: 6980000 | 3327.2541   | 5515.7402  | 5704.0772   |           |
| 338.8360               | -14353.9197 | -1787.8554 | 0.0000      | 0.0000    |
| 8002.1394              | 6746.2719   | 305.1345   | -1255.8676  | 6811.9599 |
| 306.6353               | -22.9209    | -46.4509   | 680285.8938 | -12.1484  |
| -12.1442               |             |            |             |           |
| [26175]ENERGY: 6990000 | 3288.1156   | 5596.2423  | 5726.3902   |           |
| 329.8060               | -14291.3159 | -1865.9643 | 0.0000      | 0.0000    |
| 7962.7520              | 6746.0260   | 303.6326   | -1216.7260  | 6812.9673 |
| 306.6640               | -170.4113   | -164.2055  | 680285.8938 | -15.1287  |
| -15.1164               |             |            |             |           |
| [26214]ENERGY: 7000000 | 3357.6873   | 5443.4384  | 5721.5112   |           |
| 350.9739               | -14329.7573 | -1807.0847 | 0.0000      | 0.0000    |
| 8008.9455              | 6745.7143   | 305.3940   | -1263.2312  | 6812.8722 |
| 306.7096               | 98.0848     | -48.5774   | 680285.8938 | -13.8369  |
| -13.8409               |             |            |             |           |
| [26264]ENERGY: 7010000 | 3349.2429   | 5500.5967  | 5746.7685   |           |
| 340.2720               | -14355.0459 | -1733.5341 | 0.0000      | 0.0000    |
| 7898.4007              | 6746.7007   | 301.1788   | -1151.7000  | 6811.5475 |
| 306.6292               | 154.3809    | 149.5480   | 680285.8938 | -17.6784  |
| -17.6767               |             |            |             |           |
| [26300]ENERGY: 7020000 | 3268.1673   | 5486.3247  | 5713.1298   |           |
| 326.7386               | -14319.3159 | -1834.3988 | 0.0000      | 0.0000    |
| 8105.2930              | 6745.9387   | 309.0679   | -1359.3543  | 6813.4771 |
| 306.6709               | 13.8482     | 0.2253     | 680285.8938 | -14.1126  |
| -14.1252               |             |            |             |           |
| [26350]ENERGY: 7030000 | 3296.8657   | 5403.5853  | 5674.6102   |           |
| 333.3028               | -14205.0507 | -1869.8626 | 0.0000      | 0.0000    |
| 8112.5130              | 6745.9638   | 309.3432   | -1366.5492  | 6812.8531 |
| 306.6819               | -140.8825   | -119.6170  | 680285.8938 | -13.8931  |
| -13.8760               |             |            |             |           |
| [26386]ENERGY: 7040000 | 3324.4579   | 5383.5820  | 5681.5359   |           |
| 337.0992               | -14287.2506 | -1815.4275 | 0.0000      | 0.0000    |
| 8121.1882              | 6745.1850   | 309.6740   | -1376.0032  | 6811.9222 |
| 306.5739               | -93.6689    | -145.7001  | 680285.8938 | -13.8813  |
| -13.8957               |             |            |             |           |
| [26436]ENERGY: 7050000 | 3257.8411   | 5474.5555  | 5753.1953   |           |
| 336.3622               | -14277.0015 | -1842.1652 | 0.0000      | 0.0000    |
| 8040.4439              | 6743.2313   | 306.5951   | -1297.2126  | 6811.6659 |
| 306.7140               | 5.3521      | -81.3183   | 680285.8938 | -13.0880  |
| -13.0908               |             |            |             |           |
| [26472]ENERGY: 7060000 | 3282.6583   | 5514.1285  | 5752.5581   |           |
| 346.8123               | -14302.2627 | -1821.2534 | 0.0000      | 0.0000    |
| 7975.5030              | 6748.1442   | 304.1188   | -1227.3589  | 6813.0906 |
| 306.6226               | 93.7327     | -6.5858    | 680285.8938 | -12.2203  |
| -12.2167               |             |            |             |           |
| [26522]ENERGY: 7070000 | 3293.4573   | 5446.3705  | 5751.0029   |           |
| 348.5950               | -14343.6988 | -1786.4949 | 0.0000      | 0.0000    |
| 8038.1046              | 6747.3365   | 306.5059   | -1290.7681  | 6812.3891 |
| 306.5138               | 38.2680     | 46.8580    | 680285.8938 | -15.2381  |

Supplementary Text 6

-15.2427  
 [26558]ENERGY: 7080000      3282.3771      5417.2965      5750.0302  
 345.1909      -14231.5290      -1830.9136      0.0000      0.0000  
 8013.7402      6746.1924      305.5768      -1267.5479      6811.6879  
 306.5297      -39.2584      -60.2619      680285.8938      -15.5702  
 -15.5765  
 [26608]ENERGY: 7090000      3398.6681      5456.6941      5739.5402  
 322.8778      -14306.8294      -1842.5004      0.0000      0.0000  
 7982.1956      6750.6461      304.3740      -1231.5495      6811.1840  
 306.7265      -28.9133      -4.6749      680285.8938      -17.6913  
 -17.6838  
 [26647]ENERGY: 7100000      3279.2405      5384.1446      5704.5848  
 338.4436      -14243.8148      -1883.6596      0.0000      0.0000  
 8162.7902      6741.7293      311.2604      -1421.0609      6810.3073  
 306.6349      -101.3910      -58.7475      680285.8938      -15.2208  
 -15.2139  
 [26697]ENERGY: 7110000      3290.3139      5485.8600      5657.4926  
 325.3859      -14344.3913      -1765.6035      0.0000      0.0000  
 8095.5402      6744.5979      308.6960      -1350.9424      6811.8456  
 306.6546      62.7979      6.0527      680285.8938      -11.8766  
 -11.8664  
 [26733]ENERGY: 7120000      3266.0312      5451.7966      5795.2241  
 349.6020      -14258.4204      -1877.7294      0.0000      0.0000  
 8020.9214      6747.4255      305.8507      -1273.4959      6811.2104  
 306.5634      -90.8409      -51.8953      680285.8938      -11.9305  
 -11.9332  
 [26783]ENERGY: 7130000      3193.1702      5486.4578      5770.9850  
 330.2058      -14266.2295      -1810.2618      0.0000      0.0000  
 8038.6080      6742.9355      306.5251      -1295.6725      6811.8469  
 306.5399      134.8973      72.0253      680285.8938      -12.0225  
 -12.0373  
 [26819]ENERGY: 7140000      3347.2852      5475.7913      5681.3154  
 324.5665      -14317.2425      -1797.3762      0.0000      0.0000  
 8034.2387      6748.5785      306.3585      -1285.6602      6810.7169  
 306.6365      -171.5579      -90.6858      680285.8938      -12.6924  
 -12.6698  
 [26869]ENERGY: 7150000      3299.7958      5512.9206      5747.2094  
 325.4218      -14275.9322      -1810.7782      0.0000      0.0000  
 7949.0644      6747.7015      303.1106      -1201.3629      6810.6748  
 306.4542      -39.5729      -6.4512      680285.8938      -14.7469  
 -14.7629  
 [26905]ENERGY: 7160000      3341.6634      5398.2694      5765.0304  
 319.3695      -14214.5464      -1867.6995      0.0000      0.0000  
 8004.5210      6746.6079      305.2253      -1257.9131      6810.2565  
 306.6359      -89.2134      -107.3654      680285.8938      -14.1917  
 -14.2057  
 [26955]ENERGY: 7170000      3271.2134      5424.4314      5706.1192  
 333.4151      -14272.1652      -1813.6347      0.0000      0.0000  
 8099.7069      6749.0861      308.8549      -1350.6208      6812.5565  
 306.7599      133.9277      145.0264      680285.8938      -15.2764  
 -15.2519  
 [26991]ENERGY: 7180000      3297.5463      5364.1800      5741.8957  
 329.0102      -14226.2609      -1840.6692      0.0000      0.0000  
 8079.7288      6745.4311      308.0931      -1334.2978      6813.2767

## Supplementary Text 6

|                        |             |            |             |           |
|------------------------|-------------|------------|-------------|-----------|
| 306.7683               | -127.6270   | -159.8208  | 680285.8938 | -11.5803  |
| -11.5993               |             |            |             |           |
| [27041]ENERGY: 7190000 | 3344.3022   | 5485.7679  | 5739.5118   |           |
| 344.2024               | -14347.1921 | -1780.7759 | 0.0000      | 0.0000    |
| 7964.9635              | 6750.7798   | 303.7169   | -1214.1837  | 6814.2299 |
| 306.8897               | 0.1487      | 4.6604     | 680285.8938 | -10.3843  |
| -10.3668               |             |            |             |           |
| [27080]ENERGY: 7200000 | 3325.7978   | 5452.7228  | 5727.5864   |           |
| 313.3046               | -14282.5194 | -1883.5305 | 0.0000      | 0.0000    |
| 8097.7753              | 6751.1371   | 308.7812   | -1346.6382  | 6814.9626 |
| 306.7406               | -168.3558   | -145.1243  | 680285.8938 | -13.8582  |
| -13.8493               |             |            |             |           |
| [27130]ENERGY: 7210000 | 3326.5780   | 5407.8941  | 5682.3320   |           |
| 346.2214               | -14326.6409 | -1719.1714 | 0.0000      | 0.0000    |
| 8035.0326              | 6752.2458   | 306.3887   | -1282.7868  | 6814.3794 |
| 306.4468               | -52.3633    | -14.0067   | 680285.8938 | -14.0234  |
| -14.0457               |             |            |             |           |
| [27166]ENERGY: 7220000 | 3180.6002   | 5420.4452  | 5781.1377   |           |
| 319.5536               | -14378.9868 | -1742.0152 | 0.0000      | 0.0000    |
| 8164.2857              | 6745.0204   | 311.3174   | -1419.2653  | 6814.5316 |
| 306.4666               | 160.3046    | 123.1425   | 680285.8938 | -11.4451  |
| -11.4497               |             |            |             |           |
| [27216]ENERGY: 7230000 | 3317.2990   | 5351.1097  | 5751.9326   |           |
| 319.3777               | -14242.9597 | -1855.5472 | 0.0000      | 0.0000    |
| 8104.5962              | 6745.8084   | 309.0413   | -1358.7878  | 6814.8525 |
| 306.3528               | -95.6815    | -57.8383   | 680285.8938 | -14.0574  |
| -14.0380               |             |            |             |           |
| [27252]ENERGY: 7240000 | 3367.6036   | 5470.8256  | 5692.5472   |           |
| 314.1425               | -14286.3548 | -1791.4752 | 0.0000      | 0.0000    |
| 7985.3309              | 6752.6197   | 304.4935   | -1232.7112  | 6815.4041 |
| 306.2682               | -18.8449    | -90.5928   | 680285.8938 | -16.8886  |
| -16.8833               |             |            |             |           |
| [27302]ENERGY: 7250000 | 3300.0781   | 5433.7772  | 5759.6268   |           |
| 362.9617               | -14330.9082 | -1851.8698 | 0.0000      | 0.0000    |
| 8076.6350              | 6750.3008   | 307.9751   | -1326.3343  | 6816.6670 |
| 306.5031               | 49.4119     | -41.4672   | 680285.8938 | -12.6560  |
| -12.6644               |             |            |             |           |
| [27338]ENERGY: 7260000 | 3343.2740   | 5329.8666  | 5738.4759   |           |
| 325.2491               | -14253.7386 | -1804.9709 | 0.0000      | 0.0000    |
| 8072.7839              | 6750.9400   | 307.8283   | -1321.8439  | 6815.1644 |
| 306.5621               | 45.6226     | -0.6019    | 680285.8938 | -8.5305   |
| -8.5464                |             |            |             |           |
| [27388]ENERGY: 7270000 | 3333.5059   | 5451.7395  | 5755.6063   |           |
| 339.5042               | -14295.6425 | -1791.8701 | 0.0000      | 0.0000    |
| 7961.1834              | 6754.0268   | 303.5728   | -1207.1566  | 6815.1173 |
| 306.4128               | -45.0403    | -88.9045   | 680285.8938 | -14.4413  |
| -14.4357               |             |            |             |           |
| [27424]ENERGY: 7280000 | 3195.1032   | 5467.1117  | 5723.3713   |           |
| 312.9817               | -14298.9837 | -1788.8559 | 0.0000      | 0.0000    |
| 8138.6905              | 6749.4187   | 310.3414   | -1389.2718  | 6814.9508 |
| 306.3217               | 97.0800     | 61.5473    | 680285.8938 | -10.8831  |
| -10.8779               |             |            |             |           |
| [27474]ENERGY: 7290000 | 3293.5719   | 5399.4663  | 5716.0144   |           |
| 328.7180               | -14182.8390 | -1800.6190 | 0.0000      | 0.0000    |

## Supplementary Text 6

|                        |             |            |             |           |
|------------------------|-------------|------------|-------------|-----------|
| 7999.3792              | 6753.6918   | 305.0292   | -1245.6874  | 6815.6382 |
| 306.3433               | 155.5452    | 59.8870    | 680285.8938 | -15.3492  |
| -15.3548               |             |            |             |           |
| [27513]ENERGY: 7300000 | 3329.5052   | 5382.3360  | 5740.1213   |           |
| 329.7795               | -14269.0855 | -1821.6617 | 0.0000      | 0.0000    |
| 8058.8171              | 6749.8119   | 307.2957   | -1309.0052  | 6814.7631 |
| 306.3675               | -45.2909    | -123.8975  | 680285.8938 | -11.8919  |
| -11.9013               |             |            |             |           |
| [27563]ENERGY: 7310000 | 3312.6026   | 5435.9912  | 5719.2882   |           |
| 349.8391               | -14233.5148 | -1784.2520 | 0.0000      | 0.0000    |
| 7953.7096              | 6753.6639   | 303.2878   | -1200.0457  | 6816.0040 |
| 306.2945               | 102.2908    | 1.9683     | 680285.8938 | -13.4001  |
| -13.3940               |             |            |             |           |
| [27599]ENERGY: 7320000 | 3370.9375   | 5417.3136  | 5710.4399   |           |
| 331.6773               | -14337.8319 | -1767.3134 | 0.0000      | 0.0000    |
| 8025.0369              | 6750.2600   | 306.0076   | -1274.7770  | 6816.3827 |
| 306.4553               | -115.6774   | -128.6107  | 680285.8938 | -14.3026  |
| -14.2852               |             |            |             |           |
| [27649]ENERGY: 7330000 | 3362.0836   | 5426.6839  | 5734.4636   |           |
| 355.2635               | -14279.9493 | -1814.3782 | 0.0000      | 0.0000    |
| 7967.7132              | 6751.8804   | 303.8218   | -1215.8328  | 6815.8567 |
| 306.3644               | 39.2197     | 80.1188    | 680285.8938 | -14.0267  |
| -14.0452               |             |            |             |           |
| [27685]ENERGY: 7340000 | 3309.8367   | 5478.6352  | 5698.3649   |           |
| 334.9942               | -14251.8828 | -1803.5731 | 0.0000      | 0.0000    |
| 7983.4377              | 6749.8127   | 304.4214   | -1233.6250  | 6816.1442 |
| 306.3527               | 7.7862      | -6.9533    | 680285.8938 | -17.4311  |
| -17.4124               |             |            |             |           |
| [27735]ENERGY: 7350000 | 3218.6185   | 5441.5595  | 5780.0480   |           |
| 319.0755               | -14171.8000 | -1912.4970 | 0.0000      | 0.0000    |
| 8077.1840              | 6752.1884   | 307.9960   | -1324.9955  | 6819.1365 |
| 306.3775               | 107.7183    | -29.6918   | 680285.8938 | -16.1390  |
| -16.1305               |             |            |             |           |
| [27771]ENERGY: 7360000 | 3293.9479   | 5511.6871  | 5722.8282   |           |
| 362.0144               | -14230.5496 | -1869.5511 | 0.0000      | 0.0000    |
| 7965.9110              | 6756.2879   | 303.7530   | -1209.6232  | 6819.0365 |
| 306.6070               | -61.7826    | -31.6652   | 680285.8938 | -11.6158  |
| -11.6325               |             |            |             |           |
| [27821]ENERGY: 7370000 | 3366.1538   | 5491.6430  | 5729.8516   |           |
| 317.7452               | -14274.9461 | -1861.3777 | 0.0000      | 0.0000    |
| 7993.0922              | 6762.1621   | 304.7895   | -1230.9301  | 6820.9172 |
| 306.6569               | 144.7160    | -36.5798   | 680285.8938 | -15.6002  |
| -15.6006               |             |            |             |           |
| [27857]ENERGY: 7380000 | 3211.3872   | 5411.8671  | 5699.0078   |           |
| 326.0087               | -14203.0232 | -1840.0011 | 0.0000      | 0.0000    |
| 8145.4147              | 6750.6611   | 310.5978   | -1394.7535  | 6819.4648 |
| 306.7225               | -69.1011    | -99.0307   | 680285.8938 | -15.7779  |
| -15.7870               |             |            |             |           |
| [27907]ENERGY: 7390000 | 3255.3517   | 5494.7492  | 5716.0270   |           |
| 336.5479               | -14279.6567 | -1828.3979 | 0.0000      | 0.0000    |
| 8060.0810              | 6754.7021   | 307.3439   | -1305.3788  | 6821.1406 |
| 306.6476               | 134.0252    | 36.2204    | 680285.8938 | -17.0712  |
| -17.0537               |             |            |             |           |
| [27946]ENERGY: 7400000 | 3308.1911   | 5407.6777  | 5692.5489   |           |

## Supplementary Text 6

|                        |             |            |             |           |
|------------------------|-------------|------------|-------------|-----------|
| 321.7093               | -14257.7509 | -1846.6640 | 0.0000      | 0.0000    |
| 8123.6041              | 6749.3162   | 309.7661   | -1374.2879  | 6819.3138 |
| 306.7426               | -59.1927    | -77.2474   | 680285.8938 | -16.1414  |
| -16.1629               |             |            |             |           |
| [27996]ENERGY: 7410000 | 3268.9313   | 5452.7624  | 5784.5185   |           |
| 369.5692               | -14263.7018 | -1817.4169 | 0.0000      | 0.0000    |
| 7958.3243              | 6752.9871   | 303.4637   | -1205.3372  | 6821.1345 |
| 306.5861               | 34.1079     | -50.0893   | 680285.8938 | -18.7536  |
| -18.7541               |             |            |             |           |
| [28032]ENERGY: 7420000 | 3339.6108   | 5468.8527  | 5750.9368   |           |
| 350.8949               | -14284.2890 | -1833.0597 | 0.0000      | 0.0000    |
| 7967.0172              | 6759.9637   | 303.7952   | -1207.0535  | 6820.2952 |
| 306.5503               | -36.4561    | -23.6300   | 680285.8938 | -15.0673  |
| -15.0556               |             |            |             |           |
| [28082]ENERGY: 7430000 | 3312.8281   | 5404.8931  | 5745.7762   |           |
| 343.3649               | -14331.6613 | -1802.1294 | 0.0000      | 0.0000    |
| 8080.5961              | 6753.6676   | 308.1262   | -1326.9285  | 6821.3335 |
| 306.7231               | -63.8035    | -69.7142   | 680285.8938 | -17.5508  |
| -17.5646               |             |            |             |           |
| [28118]ENERGY: 7440000 | 3349.1445   | 5440.1830  | 5707.2766   |           |
| 337.6131               | -14319.4500 | -1852.7826 | 0.0000      | 0.0000    |
| 8091.0603              | 6753.0450   | 308.5252   | -1338.0153  | 6821.3642 |
| 306.7719               | -130.7410   | -161.4301  | 680285.8938 | -17.1938  |
| -17.1855               |             |            |             |           |
| [28168]ENERGY: 7450000 | 3304.5967   | 5466.2811  | 5748.7484   |           |
| 332.1467               | -14281.4243 | -1825.1011 | 0.0000      | 0.0000    |
| 8012.9081              | 6758.1556   | 305.5451   | -1254.7525  | 6821.5152 |
| 306.5943               | 63.7865     | 63.8824    | 680285.8938 | -17.1140  |
| -17.1023               |             |            |             |           |
| [28204]ENERGY: 7460000 | 3268.5148   | 5456.3442  | 5755.7869   |           |
| 311.4704               | -14367.6718 | -1790.4625 | 0.0000      | 0.0000    |
| 8121.9822              | 6755.9643   | 309.7043   | -1366.0179  | 6822.2874 |
| 306.5102               | 126.8599    | 52.1499    | 680285.8938 | -18.6541  |
| -18.6816               |             |            |             |           |
| [28254]ENERGY: 7470000 | 3337.9994   | 5407.0950  | 5652.2877   |           |
| 336.7042               | -14280.9827 | -1798.1585 | 0.0000      | 0.0000    |
| 8098.3070              | 6753.2521   | 308.8015   | -1345.0549  | 6820.1575 |
| 306.6317               | 96.2668     | 31.9037    | 680285.8938 | -17.8453  |
| -17.8225               |             |            |             |           |
| [28290]ENERGY: 7480000 | 3322.5581   | 5379.2193  | 5748.0950   |           |
| 337.6223               | -14307.7810 | -1805.9635 | 0.0000      | 0.0000    |
| 8081.5927              | 6755.3428   | 308.1642   | -1326.2499  | 6820.3092 |
| 306.6135               | -109.9654   | -114.0403  | 680285.8938 | -16.7431  |
| -16.7431               |             |            |             |           |
| [28340]ENERGY: 7490000 | 3337.5393   | 5418.0061  | 5700.2389   |           |
| 333.5297               | -14210.1902 | -1804.2182 | 0.0000      | 0.0000    |
| 7983.0286              | 6757.9342   | 304.4058   | -1225.0944  | 6821.9069 |
| 306.6359               | 48.7413     | -33.7440   | 680285.8938 | -14.0382  |
| -14.0426               |             |            |             |           |
| [28379]ENERGY: 7500000 | 3329.4951   | 5547.6197  | 5689.3792   |           |
| 364.1041               | -14329.1801 | -1867.5283 | 0.0000      | 0.0000    |
| 8026.2382              | 6760.1277   | 306.0534   | -1266.1105  | 6823.0433 |
| 306.8490               | -65.7460    | -68.9375   | 680285.8938 | -15.0805  |
| -15.0906               |             |            |             |           |

## Supplementary Text 6

|                        |             |            |             |           |
|------------------------|-------------|------------|-------------|-----------|
| [28429]ENERGY: 7510000 | 3342.9437   | 5478.0261  | 5711.4165   |           |
| 323.1322               | -14345.5915 | -1824.0998 | 0.0000      | 0.0000    |
| 8070.4129              | 6756.2401   | 307.7379   | -1314.1728  | 6823.8582 |
| 306.7911               | -13.4925    | -7.0831    | 680285.8938 | -13.4575  |
| -13.4391               |             |            |             |           |
| [28465]ENERGY: 7520000 | 3332.2289   | 5466.6409  | 5704.8895   |           |
| 343.8265               | -14385.3889 | -1779.5500 | 0.0000      | 0.0000    |
| 8076.9588              | 6759.6057   | 307.9875   | -1317.3531  | 6823.9834 |
| 306.8430               | 21.2909     | -56.3517   | 680285.8938 | -13.1083  |
| -13.1109               |             |            |             |           |
| [28515]ENERGY: 7530000 | 3231.2550   | 5527.1407  | 5737.1673   |           |
| 352.1619               | -14332.9568 | -1829.5013 | 0.0000      | 0.0000    |
| 8074.7951              | 6760.0620   | 307.9050   | -1314.7331  | 6824.3761 |
| 306.9349               | 157.6341    | 20.3887    | 680285.8938 | -14.2152  |
| -14.2364               |             |            |             |           |
| [28551]ENERGY: 7540000 | 3272.4551   | 5499.8004  | 5731.4233   |           |
| 318.4598               | -14404.9570 | -1787.2173 | 0.0000      | 0.0000    |
| 8129.0082              | 6758.9724   | 309.9722   | -1370.0357  | 6823.2504 |
| 306.7224               | -21.2257    | 10.2770    | 680285.8938 | -16.6464  |
| -16.6172               |             |            |             |           |
| [28601]ENERGY: 7550000 | 3306.5495   | 5493.8431  | 5744.5553   |           |
| 348.6764               | -14359.9091 | -1786.4127 | 0.0000      | 0.0000    |
| 8011.8300              | 6759.1325   | 305.5040   | -1252.6975  | 6824.5133 |
| 306.9544               | 54.7753     | -3.8521    | 680285.8938 | -15.0865  |
| -15.0888               |             |            |             |           |
| [28637]ENERGY: 7560000 | 3336.9826   | 5439.3866  | 5750.8936   |           |
| 348.2870               | -14338.6518 | -1834.3505 | 0.0000      | 0.0000    |
| 8052.8081              | 6755.3556   | 307.0666   | -1297.4526  | 6825.0798 |
| 306.9432               | 53.8801     | -1.9892    | 680285.8938 | -17.2046  |
| -17.2171               |             |            |             |           |
| [28687]ENERGY: 7570000 | 3304.2141   | 5525.1076  | 5754.6660   |           |
| 335.8867               | -14302.8354 | -1918.3881 | 0.0000      | 0.0000    |
| 8060.6531              | 6759.3041   | 307.3657   | -1301.3491  | 6825.2027 |
| 306.8679               | 59.6576     | -94.1058   | 680285.8938 | -13.4230  |
| -13.4199               |             |            |             |           |
| [28723]ENERGY: 7580000 | 3278.4521   | 5478.0176  | 5785.5393   |           |
| 349.9280               | -14273.0873 | -1868.1743 | 0.0000      | 0.0000    |
| 8007.0321              | 6757.7075   | 305.3210   | -1249.3246  | 6824.9338 |
| 306.9041               | -22.9687    | -85.3720   | 680285.8938 | -11.1347  |
| -11.1353               |             |            |             |           |
| [28773]ENERGY: 7590000 | 3284.1868   | 5486.4598  | 5728.3649   |           |
| 341.8076               | -14312.1726 | -1871.2110 | 0.0000      | 0.0000    |
| 8105.9320              | 6763.3674   | 309.0923   | -1342.5646  | 6824.9054 |
| 306.9407               | 104.9732    | 42.6784    | 680285.8938 | -10.5138  |
| -10.5112               |             |            |             |           |
| [28812]ENERGY: 7600000 | 3317.6977   | 5412.4458  | 5795.8198   |           |
| 333.1492               | -14289.2815 | -1811.5213 | 0.0000      | 0.0000    |
| 8001.2570              | 6759.5667   | 305.1008   | -1241.6903  | 6824.8436 |
| 307.0101               | 163.7439    | 87.4985    | 680285.8938 | -12.1522  |
| -12.1595               |             |            |             |           |
| [28862]ENERGY: 7610000 | 3363.4786   | 5441.7513  | 5692.4578   |           |
| 344.8383               | -14283.4139 | -1893.9016 | 0.0000      | 0.0000    |
| 8093.8390              | 6759.0496   | 308.6311   | -1334.7894  | 6824.4594 |
| 306.9562               | -127.9908   | -106.2521  | 680285.8938 | -11.3917  |

Supplementary Text 6

-11.3883  
 [28898]ENERGY: 7620000      3340.7818      5401.2444      5713.5451  
 356.3794      -14388.9222      -1809.1846      0.0000      0.0000  
 8142.9431      6756.7870      310.5036      -1386.1561      6825.1428  
 307.0100      148.0706      81.0676      680285.8938      -12.5973  
 -12.5941  
 [28948]ENERGY: 7630000      3283.0193      5450.9710      5779.1266  
 350.2322      -14263.1628      -1814.0077      0.0000      0.0000  
 7975.5062      6761.6850      304.1189      -1213.8212      6823.3958  
 306.9665      23.1534      10.5073      680285.8938      -13.2970  
 -13.3003  
 [28984]ENERGY: 7640000      3296.2974      5522.6829      5721.0717  
 345.6755      -14322.6560      -1808.5477      0.0000      0.0000  
 8006.3759      6760.8996      305.2960      -1245.4762      6824.2698  
 306.9014      -85.7009      -30.2911      680285.8938      -10.2016  
 -10.1894  
 [29034]ENERGY: 7650000      3304.5394      5506.9507      5784.6675  
 320.7240      -14357.7486      -1802.5532      0.0000      0.0000  
 8003.5519      6760.1317      305.1883      -1243.4201      6823.9926  
 306.9834      230.5362      141.7772      680285.8938      -10.8513  
 -10.8845  
 [29070]ENERGY: 7660000      3296.0779      5457.9158      5727.5956  
 338.4888      -14322.2590      -1846.4471      0.0000      0.0000  
 8105.8043      6757.1762      309.0874      -1348.6281      6824.3197  
 306.9191      134.6523      70.8572      680285.8938      -9.7159  
 -9.7098  
 [29120]ENERGY: 7670000      3330.0906      5477.2644      5709.2718  
 335.3841      -14307.9893      -1849.7157      0.0000      0.0000  
 8066.0538      6760.3596      307.5716      -1305.6941      6824.5318  
 306.7470      -194.6418      -183.7791      680285.8938      -8.6281  
 -8.6061  
 [29156]ENERGY: 7680000      3382.2051      5468.9815      5684.0186  
 315.6617      -14277.7323      -1917.1120      0.0000      0.0000  
 8101.8395      6757.8623      308.9362      -1343.9772      6825.3584  
 306.9713      -105.1473      -83.9386      680285.8938      -6.5882  
 -6.6145  
 [29206]ENERGY: 7690000      3268.7604      5387.3703      5729.9753  
 335.4403      -14306.0312      -1772.1513      0.0000      0.0000  
 8115.8970      6759.2608      309.4722      -1356.6362      6824.5679  
 307.0246      -0.4882      -66.2259      680285.8938      -6.5655  
 -6.5560  
 [29245]ENERGY: 7700000      3264.9013      5382.5389      5740.3934  
 326.0152      -14210.1432      -1891.3008      0.0000      0.0000  
 8149.4878      6761.8927      310.7531      -1387.5952      6826.6030  
 306.9784      118.2441      -9.0096      680285.8938      -8.9076  
 -8.9066  
 [29295]ENERGY: 7710000      3381.5858      5409.4469      5719.8699  
 343.3480      -14374.2109      -1782.5843      0.0000      0.0000  
 8064.7339      6762.1893      307.5213      -1302.5445      6826.0524  
 306.9026      -163.6924      -75.9908      680285.8938      -9.0423  
 -9.0265  
 [29331]ENERGY: 7720000      3342.2407      5465.9102      5650.5194  
 350.0503      -14353.9728      -1787.5238      0.0000      0.0000  
 8096.8265      6764.0505      308.7451      -1332.7760      6826.7846

## Supplementary Text 6

|                        |             |            |             |           |
|------------------------|-------------|------------|-------------|-----------|
| 306.9486               | 100.5202    | 30.1739    | 680285.8938 | -7.0489   |
| -7.0652                |             |            |             |           |
| [29381]ENERGY: 7730000 | 3397.3277   | 5431.4008  | 5705.7898   |           |
| 345.7569               | -14334.4724 | -1777.6113 | 0.0000      | 0.0000    |
| 7996.4636              | 6764.6552   | 304.9181   | -1231.8085  | 6826.4542 |
| 306.9485               | -27.6982    | 1.9364     | 680285.8938 | -9.2745   |
| -9.2598                |             |            |             |           |
| [29417]ENERGY: 7740000 | 3284.4266   | 5472.2431  | 5814.0362   |           |
| 333.9631               | -14409.1550 | -1766.1396 | 0.0000      | 0.0000    |
| 8035.0100              | 6764.3844   | 306.3879   | -1270.6256  | 6827.2632 |
| 306.9425               | -8.9506     | -20.6663   | 680285.8938 | -9.1382   |
| -9.1355                |             |            |             |           |
| [29467]ENERGY: 7750000 | 3370.0687   | 5493.7100  | 5723.7258   |           |
| 335.6031               | -14330.7422 | -1807.3559 | 0.0000      | 0.0000    |
| 7978.1834              | 6763.1929   | 304.2210   | -1214.9905  | 6828.5049 |
| 306.8958               | -106.9312   | -132.0125  | 680285.8938 | -7.8373   |
| -7.8499                |             |            |             |           |
| [29503]ENERGY: 7760000 | 3338.1870   | 5408.1328  | 5678.5360   |           |
| 317.8816               | -14214.6430 | -1918.3631 | 0.0000      | 0.0000    |
| 8149.4785              | 6759.2098   | 310.7528   | -1390.2687  | 6826.6529 |
| 306.8297               | 91.8379     | 130.1248   | 680285.8938 | -7.4170   |
| -7.4090                |             |            |             |           |
| [29553]ENERGY: 7770000 | 3309.8641   | 5505.9143  | 5712.7152   |           |
| 330.6789               | -14299.3717 | -1826.0666 | 0.0000      | 0.0000    |
| 8032.0894              | 6765.8235   | 306.2765   | -1266.2659  | 6828.4090 |
| 306.8404               | -24.1969    | -84.3996   | 680285.8938 | -10.6631  |
| -10.6525               |             |            |             |           |
| [29589]ENERGY: 7780000 | 3318.3897   | 5520.9092  | 5725.2033   |           |
| 323.7118               | -14249.6308 | -1891.5230 | 0.0000      | 0.0000    |
| 8016.9088              | 6763.9688   | 305.6977   | -1252.9400  | 6827.6493 |
| 306.8208               | -40.4427    | -6.8020    | 680285.8938 | -6.4852   |
| -6.4832                |             |            |             |           |
| [29639]ENERGY: 7790000 | 3275.9851   | 5533.7584  | 5688.6220   |           |
| 324.2691               | -14356.5892 | -1804.8640 | 0.0000      | 0.0000    |
| 8098.8666              | 6760.0480   | 308.8228   | -1338.8186  | 6826.8292 |
| 307.1627               | 4.9618      | -37.6831   | 680285.8938 | -7.0560   |
| -7.0777                |             |            |             |           |
| [29678]ENERGY: 7800000 | 3249.0059   | 5420.7227  | 5716.9366   |           |
| 340.2778               | -14277.9351 | -1784.0365 | 0.0000      | 0.0000    |
| 8096.5515              | 6761.5229   | 308.7346   | -1335.0286  | 6826.9463 |
| 307.1216               | -25.4266    | -20.5253   | 680285.8938 | -9.3314   |
| -9.3321                |             |            |             |           |
| [29728]ENERGY: 7810000 | 3280.3336   | 5494.2886  | 5699.5232   |           |
| 330.8385               | -14278.4750 | -1861.3775 | 0.0000      | 0.0000    |
| 8094.6671              | 6759.7986   | 308.6627   | -1334.8685  | 6827.1658 |
| 307.1151               | 164.5258    | 80.2986    | 680285.8938 | -7.7200   |
| -7.7316                |             |            |             |           |
| [29764]ENERGY: 7820000 | 3395.3918   | 5509.7196  | 5734.1928   |           |
| 315.2529               | -14371.7272 | -1829.1261 | 0.0000      | 0.0000    |
| 8010.9007              | 6764.6046   | 305.4686   | -1246.2962  | 6828.1134 |
| 307.2333               | -30.6858    | 11.8099    | 680285.8938 | -12.7033  |
| -12.6759               |             |            |             |           |
| [29814]ENERGY: 7830000 | 3228.6912   | 5481.6964  | 5679.5011   |           |
| 344.3013               | -14209.9941 | -1772.6044 | 0.0000      | 0.0000    |



## Supplementary Text 6

|                        |             |            |             |           |
|------------------------|-------------|------------|-------------|-----------|
| 8015.9441              | 6767.5355   | 305.6609   | -1248.4086  | 6829.0285 |
| 307.1872               | 87.0664     | 109.7657   | 680285.8938 | -10.0118  |
| -10.0107               |             |            |             |           |
| [29850]ENERGY: 7840000 | 3282.2503   | 5471.6422  | 5680.3968   |           |
| 317.6238               | -14361.5881 | -1776.7786 | 0.0000      | 0.0000    |
| 8149.8413              | 6763.3878   | 310.7666   | -1386.4535  | 6829.1661 |
| 307.1910               | 0.9342      | -1.7573    | 680285.8938 | -6.2171   |
| -6.2111                |             |            |             |           |
| [29900]ENERGY: 7850000 | 3277.7706   | 5540.6562  | 5720.0526   |           |
| 344.5236               | -14360.2509 | -1853.8055 | 0.0000      | 0.0000    |
| 8095.2647              | 6764.2113   | 308.6855   | -1331.0534  | 6829.5078 |
| 307.2500               | -16.3658    | -64.6482   | 680285.8938 | -7.9477   |
| -7.9646                |             |            |             |           |
| [29936]ENERGY: 7860000 | 3295.9558   | 5436.4394  | 5743.1468   |           |
| 340.2479               | -14318.2074 | -1814.0265 | 0.0000      | 0.0000    |
| 8078.7218              | 6762.2778   | 308.0547   | -1316.4440  | 6828.9477 |
| 307.1336               | -73.6972    | -75.0002   | 680285.8938 | -6.1155   |
| -6.1153                |             |            |             |           |
| [29986]ENERGY: 7870000 | 3232.9638   | 5466.5025  | 5741.8438   |           |
| 318.3471               | -14265.7458 | -1841.7316 | 0.0000      | 0.0000    |
| 8110.9628              | 6763.1427   | 309.2841   | -1347.8201  | 6828.5373 |
| 306.9322               | 25.3410     | 10.2685    | 680285.8938 | -10.3997  |
| -10.3916               |             |            |             |           |
| [30022]ENERGY: 7880000 | 3282.3380   | 5481.7410  | 5679.5464   |           |
| 339.9078               | -14349.1935 | -1786.4874 | 0.0000      | 0.0000    |
| 8114.4349              | 6762.2872   | 309.4165   | -1352.1477  | 6828.4103 |
| 306.9176               | 162.9172    | 162.9826   | 680285.8938 | -5.6709   |
| -5.7019                |             |            |             |           |
| [30072]ENERGY: 7890000 | 3267.7756   | 5489.0701  | 5739.5300   |           |
| 353.6272               | -14251.0927 | -1830.3693 | 0.0000      | 0.0000    |
| 7996.1098              | 6764.6509   | 304.9046   | -1231.4589  | 6828.6956 |
| 306.8574               | -32.3209    | -86.5848   | 680285.8938 | -8.8398   |
| -8.8246                |             |            |             |           |
| [30111]ENERGY: 7900000 | 3360.1869   | 5546.1227  | 5770.8334   |           |
| 337.4287               | -14418.8694 | -1854.2285 | 0.0000      | 0.0000    |
| 8021.5839              | 6763.0576   | 305.8759   | -1258.5263  | 6828.4410 |
| 307.1254               | 61.9838     | 23.2253    | 680285.8938 | -9.8624   |
| -9.8493                |             |            |             |           |
| [30161]ENERGY: 7910000 | 3188.2460   | 5592.3470  | 5693.6789   |           |
| 349.8106               | -14354.2451 | -1794.3574 | 0.0000      | 0.0000    |
| 8086.6236              | 6762.1037   | 308.3560   | -1324.5199  | 6829.3116 |
| 307.0902               | 48.6822     | -39.4074   | 680285.8938 | -4.9844   |
| -4.9953                |             |            |             |           |
| [30197]ENERGY: 7920000 | 3324.5127   | 5421.0769  | 5753.1488   |           |
| 344.6811               | -14316.0859 | -1810.9694 | 0.0000      | 0.0000    |
| 8048.6607              | 6765.0249   | 306.9084   | -1283.6358  | 6829.3736 |
| 307.1318               | 116.7663    | 14.5901    | 680285.8938 | -10.4001  |
| -10.3922               |             |            |             |           |
| [30247]ENERGY: 7930000 | 3290.3328   | 5429.0858  | 5744.6888   |           |
| 354.4470               | -14238.1532 | -1876.4468 | 0.0000      | 0.0000    |
| 8058.1902              | 6762.1445   | 307.2718   | -1296.0456  | 6828.6600 |
| 307.1921               | 165.7077    | 125.5704   | 680285.8938 | -7.4810   |
| -7.4987                |             |            |             |           |
| [30283]ENERGY: 7940000 | 3288.7784   | 5548.0506  | 5753.1218   |           |

## Supplementary Text 6

|                        |             |            |             |           |
|------------------------|-------------|------------|-------------|-----------|
| 330.3445               | -14420.8611 | -1807.4010 | 0.0000      | 0.0000    |
| 8070.4728              | 6762.5061   | 307.7401   | -1307.9667  | 6829.8857 |
| 307.0922               | 61.1721     | -9.9176    | 680285.8938 | -8.0195   |
| -8.0034                |             |            |             |           |
| [30333]ENERGY: 7950000 | 3276.8371   | 5467.0068  | 5756.7923   |           |
| 373.3206               | -14335.7145 | -1801.6759 | 0.0000      | 0.0000    |
| 8026.4913              | 6763.0576   | 306.0631   | -1263.4337  | 6829.1906 |
| 307.1021               | 64.2060     | 68.5898    | 680285.8938 | -9.1470   |
| -9.1448                |             |            |             |           |
| [30369]ENERGY: 7960000 | 3327.4571   | 5506.6209  | 5711.8277   |           |
| 327.7819               | -14382.9749 | -1779.7759 | 0.0000      | 0.0000    |
| 8053.6591              | 6764.5959   | 307.0990   | -1289.0632  | 6828.9358 |
| 306.9466               | 73.7431     | -19.5578   | 680285.8938 | -11.0493  |
| -11.0512               |             |            |             |           |
| [30419]ENERGY: 7970000 | 3272.3082   | 5451.0257  | 5701.7237   |           |
| 344.8977               | -14206.1728 | -1830.0034 | 0.0000      | 0.0000    |
| 8035.9667              | 6769.7460   | 306.4244   | -1266.2208  | 6830.6381 |
| 307.0046               | 2.6011      | 0.0950     | 680285.8938 | -9.2800   |
| -9.2702                |             |            |             |           |
| [30455]ENERGY: 7980000 | 3314.5809   | 5549.3142  | 5733.4628   |           |
| 342.5898               | -14424.6083 | -1802.1081 | 0.0000      | 0.0000    |
| 8050.0147              | 6763.2460   | 306.9600   | -1286.7686  | 6828.4670 |
| 307.0618               | -153.0862   | -31.2780   | 680285.8938 | -8.1167   |
| -8.1236                |             |            |             |           |
| [30505]ENERGY: 7990000 | 3326.7745   | 5482.0726  | 5699.9983   |           |
| 347.7946               | -14349.3375 | -1786.8459 | 0.0000      | 0.0000    |
| 8046.4575              | 6766.9141   | 306.8244   | -1279.5434  | 6829.6458 |
| 306.9480               | 134.7446    | 68.3197    | 680285.8938 | -8.5374   |
| -8.5298                |             |            |             |           |
| [30544]ENERGY: 8000000 | 3309.7223   | 5500.2943  | 5741.9187   |           |
| 351.1498               | -14288.7508 | -1826.3900 | 0.0000      | 0.0000    |
| 7982.9561              | 6770.9002   | 304.4030   | -1212.0558  | 6830.7017 |
| 307.1641               | -93.9191    | -87.5102   | 680285.8938 | -11.2149  |
| -11.2318               |             |            |             |           |
| [30594]ENERGY: 8010000 | 3326.6048   | 5583.1567  | 5713.2929   |           |
| 347.5697               | -14345.2571 | -1869.7449 | 0.0000      | 0.0000    |
| 8013.8801              | 6769.5022   | 305.5822   | -1244.3779  | 6831.7987 |
| 307.0814               | -47.1916    | -56.0510   | 680285.8938 | -6.8114   |
| -6.8015                |             |            |             |           |
| [30630]ENERGY: 8020000 | 3338.1087   | 5444.1586  | 5700.7144   |           |
| 352.5358               | -14251.2424 | -1828.3735 | 0.0000      | 0.0000    |
| 8010.8125              | 6766.7141   | 305.4652   | -1244.0984  | 6831.1945 |
| 307.0402               | -14.5293    | -38.4035   | 680285.8938 | -7.3499   |
| -7.3617                |             |            |             |           |
| [30680]ENERGY: 8030000 | 3289.5852   | 5416.1248  | 5776.1436   |           |
| 349.7058               | -14318.1104 | -1816.1588 | 0.0000      | 0.0000    |
| 8066.3637              | 6763.6539   | 307.5835   | -1302.7099  | 6831.1691 |
| 306.8423               | -30.9132    | -40.0318   | 680285.8938 | -8.9596   |
| -8.9563                |             |            |             |           |
| [30716]ENERGY: 8040000 | 3252.6704   | 5474.4981  | 5672.1838   |           |
| 315.7470               | -14179.2503 | -1850.5296 | 0.0000      | 0.0000    |
| 8081.7427              | 6767.0622   | 308.1699   | -1314.6805  | 6831.9582 |
| 306.9028               | 111.8597    | 86.4382    | 680285.8938 | -4.1431   |
| -4.1438                |             |            |             |           |

## Supplementary Text 6

|                        |             |            |             |           |
|------------------------|-------------|------------|-------------|-----------|
| [30766]ENERGY: 8050000 | 3318.9774   | 5542.5147  | 5749.8390   |           |
| 342.2524               | -14330.9234 | -1808.5260 | 0.0000      | 0.0000    |
| 7956.1447              | 6770.2787   | 303.3806   | -1185.8659  | 6832.3646 |
| 307.0627               | 74.7381     | 15.5756    | 680285.8938 | -3.9091   |
| -3.9082                |             |            |             |           |
| [30802]ENERGY: 8060000 | 3288.0852   | 5462.4755  | 5723.1050   |           |
| 338.0175               | -14292.9430 | -1795.6852 | 0.0000      | 0.0000    |
| 8046.1960              | 6769.2509   | 306.8144   | -1276.9450  | 6832.0608 |
| 307.1840               | 95.2864     | 6.8883     | 680285.8938 | -9.2159   |
| -9.2269                |             |            |             |           |
| [30852]ENERGY: 8070000 | 3311.0739   | 5588.7922  | 5705.4997   |           |
| 319.6226               | -14324.0445 | -1780.9006 | 0.0000      | 0.0000    |
| 7953.3780              | 6773.4214   | 303.2751   | -1179.9566  | 6834.0378 |
| 307.0038               | 108.5060    | 26.9614    | 680285.8938 | -5.9910   |
| -5.9792                |             |            |             |           |
| [30888]ENERGY: 8080000 | 3349.5348   | 5442.1083  | 5696.6077   |           |
| 326.5928               | -14335.6329 | -1752.6717 | 0.0000      | 0.0000    |
| 8042.1046              | 6768.6435   | 306.6584   | -1273.4610  | 6834.3658 |
| 307.0794               | -131.1316   | -74.4564   | 680285.8938 | -7.6422   |
| -7.6287                |             |            |             |           |
| [30938]ENERGY: 8090000 | 3356.3246   | 5526.8156  | 5751.1739   |           |
| 341.3276               | -14310.5272 | -1820.4624 | 0.0000      | 0.0000    |
| 7928.5859              | 6773.2379   | 302.3298   | -1155.3479  | 6833.3097 |
| 307.0473               | 70.7755     | 46.7511    | 680285.8938 | -4.0297   |
| -4.0452                |             |            |             |           |
| [30977]ENERGY: 8100000 | 3283.2026   | 5480.7282  | 5717.1544   |           |
| 331.6234               | -14273.7958 | -1838.4572 | 0.0000      | 0.0000    |
| 8071.4909              | 6771.9465   | 307.7790   | -1299.5445  | 6833.9017 |
| 307.1637               | 45.4158     | -11.3434   | 680285.8938 | -8.0339   |
| -8.0208                |             |            |             |           |
| [31027]ENERGY: 8110000 | 3350.7437   | 5559.1434  | 5723.6966   |           |
| 355.6527               | -14324.0348 | -1852.8169 | 0.0000      | 0.0000    |
| 7956.4581              | 6768.8429   | 303.3926   | -1187.6152  | 6833.1223 |
| 307.1593               | -48.4605    | -98.1595   | 680285.8938 | -10.7592  |
| -10.7760               |             |            |             |           |
| [31063]ENERGY: 8120000 | 3282.5484   | 5455.8298  | 5703.2814   |           |
| 344.3934               | -14303.9250 | -1801.8569 | 0.0000      | 0.0000    |
| 8088.2028              | 6768.4740   | 308.4162   | -1319.7288  | 6833.3619 |
| 307.1716               | 96.2225     | 94.7634    | 680285.8938 | -9.4780   |
| -9.4737                |             |            |             |           |
| [31113]ENERGY: 8130000 | 3361.8152   | 5412.8773  | 5728.8422   |           |
| 332.7716               | -14319.2766 | -1831.5770 | 0.0000      | 0.0000    |
| 8082.1103              | 6767.5630   | 308.1839   | -1314.5473  | 6834.0172 |
| 307.2662               | 52.7015     | -17.4447   | 680285.8938 | -5.3236   |
| -5.3317                |             |            |             |           |
| [31149]ENERGY: 8140000 | 3305.7711   | 5490.8508  | 5719.2753   |           |
| 331.0258               | -14234.6028 | -1901.5055 | 0.0000      | 0.0000    |
| 8055.9700              | 6766.7847   | 307.1871   | -1289.1852  | 6833.4387 |
| 307.1463               | -22.3558    | 8.7783     | 680285.8938 | -15.2464  |
| -15.2265               |             |            |             |           |
| [31199]ENERGY: 8150000 | 3236.4968   | 5479.6093  | 5754.6799   |           |
| 356.9262               | -14315.2859 | -1839.9214 | 0.0000      | 0.0000    |
| 8095.7695              | 6768.2744   | 308.7047   | -1327.4950  | 6833.5156 |
| 307.4613               | 174.6824    | 96.5661    | 680285.8938 | -4.2344   |

Supplementary Text 6

-4.2465

|                        |             |            |             |
|------------------------|-------------|------------|-------------|
| [31235]ENERGY: 8160000 | 3336.5582   | 5502.5507  | 5703.0151   |
| 336.9666               | -14324.8708 | -1856.3801 | 0.0000      |
| 8072.6985              | 6770.5383   | 307.8250   | -1302.1602  |
| 307.3512               | 92.2552     | 8.4917     | 680285.8938 |
| -11.6056               |             |            | -11.5997    |

|                        |             |            |             |
|------------------------|-------------|------------|-------------|
| [31285]ENERGY: 8170000 | 3259.4188   | 5508.3603  | 5686.0672   |
| 325.7576               | -14245.8212 | -1832.4071 | 0.0000      |
| 8068.5845              | 6769.9600   | 307.6681   | -1298.6245  |
| 307.1818               | 114.4949    | -11.8562   | 680285.8938 |
| -8.3522                |             |            | -8.3441     |

|                        |             |            |             |
|------------------------|-------------|------------|-------------|
| [31321]ENERGY: 8180000 | 3313.8906   | 5446.7866  | 5698.7256   |
| 320.2638               | -14322.8846 | -1783.6299 | 0.0000      |
| 8094.4493              | 6767.6015   | 308.6544   | -1326.8478  |
| 307.0191               | -67.8386    | 16.8556    | 680285.8938 |
| -6.3272                |             |            | -6.3513     |

|                        |             |            |             |
|------------------------|-------------|------------|-------------|
| [31371]ENERGY: 8190000 | 3346.1176   | 5442.8038  | 5726.7776   |
| 332.3534               | -14353.0187 | -1803.2098 | 0.0000      |
| 8074.8574              | 6766.6813   | 307.9073   | -1308.1761  |
| 307.1029               | 9.9052      | 53.6806    | 680285.8938 |
| -1.9500                |             |            | -1.9564     |

|                        |             |            |             |
|------------------------|-------------|------------|-------------|
| [31410]ENERGY: 8200000 | 3273.7862   | 5506.1250  | 5746.9361   |
| 336.6045               | -14368.6800 | -1765.3549 | 0.0000      |
| 8035.5702              | 6764.9870   | 306.4092   | -1270.5831  |
| 307.1125               | 104.5588    | 65.9484    | 680285.8938 |
| -4.2070                |             |            | -4.2068     |

|                        |             |            |             |
|------------------------|-------------|------------|-------------|
| [31460]ENERGY: 8210000 | 3296.9704   | 5466.8293  | 5719.7888   |
| 296.7944               | -14243.7730 | -1812.2990 | 0.0000      |
| 8044.9364              | 6769.2474   | 306.7664   | -1275.6890  |
| 307.2474               | 25.0896     | 22.5689    | 680285.8938 |
| -6.6824                |             |            | -6.6634     |

|                        |             |            |             |
|------------------------|-------------|------------|-------------|
| [31496]ENERGY: 8220000 | 3334.6435   | 5534.1044  | 5665.4838   |
| 323.0738               | -14277.9147 | -1898.4730 | 0.0000      |
| 8088.5579              | 6769.4757   | 308.4298   | -1319.0822  |
| 307.2878               | -58.8320    | -103.0578  | 680285.8938 |
| -1.0679                |             |            | -1.0789     |

|                        |             |            |             |
|------------------------|-------------|------------|-------------|
| [31546]ENERGY: 8230000 | 3311.7839   | 5498.9143  | 5708.7567   |
| 331.0996               | -14279.8355 | -1835.1786 | 0.0000      |
| 8035.8927              | 6771.4330   | 306.4215   | -1264.4596  |
| 307.2200               | 53.2430     | 50.6183    | 680285.8938 |
| -9.2008                |             |            | -9.1911     |

|                        |             |            |             |
|------------------------|-------------|------------|-------------|
| [31582]ENERGY: 8240000 | 3293.5323   | 5486.7402  | 5688.9947   |
| 346.7526               | -14210.3630 | -1882.8191 | 0.0000      |
| 8043.5683              | 6766.4059   | 306.7142   | -1277.1624  |
| 307.2540               | 36.1013     | -0.0780    | 680285.8938 |
| -3.3309                |             |            | -3.3353     |

|                        |             |            |             |
|------------------------|-------------|------------|-------------|
| [31632]ENERGY: 8250000 | 3358.4498   | 5439.3833  | 5742.8251   |
| 343.4353               | -14350.2193 | -1853.6564 | 0.0000      |
| 8086.9649              | 6767.1828   | 308.3690   | -1319.7822  |
| 307.2756               | 44.5826     | -15.6991   | 680285.8938 |
| -3.6397                |             |            | -3.6517     |

|                        |             |            |            |
|------------------------|-------------|------------|------------|
| [31668]ENERGY: 8260000 | 3218.6829   | 5512.2320  | 5708.2240  |
| 318.7156               | -14267.8751 | -1789.0680 | 0.0000     |
| 8067.2814              | 6768.1927   | 307.6184   | -1299.0887 |
|                        |             |            | 6835.2886  |

## Supplementary Text 6

|                        |             |            |             |           |
|------------------------|-------------|------------|-------------|-----------|
| 307.3988               | 201.0909    | 95.0420    | 680285.8938 | -1.5382   |
| -1.5619                |             |            |             |           |
| [31718]ENERGY: 8270000 | 3294.4777   | 5500.8126  | 5694.8654   |           |
| 349.1719               | -14273.9284 | -1824.2254 | 0.0000      | 0.0000    |
| 8031.6058              | 6772.7797   | 306.2581   | -1258.8262  | 6836.8919 |
| 307.4477               | 60.0113     | -30.2153   | 680285.8938 | -4.6216   |
| -4.6112                |             |            |             |           |
| [31754]ENERGY: 8280000 | 3263.6582   | 5393.3773  | 5765.4929   |           |
| 345.6829               | -14331.1360 | -1784.5121 | 0.0000      | 0.0000    |
| 8116.7533              | 6769.3164   | 309.5049   | -1347.4368  | 6836.3064 |
| 307.4737               | -139.2169   | -105.8512  | 680285.8938 | -2.4668   |
| -2.4631                |             |            |             |           |
| [31804]ENERGY: 8290000 | 3286.9336   | 5485.0673  | 5729.8918   |           |
| 336.6414               | -14299.9935 | -1864.6333 | 0.0000      | 0.0000    |
| 8097.6247              | 6771.5321   | 308.7755   | -1326.0926  | 6835.5656 |
| 307.5969               | 26.7085     | 18.5244    | 680285.8938 | -6.8582   |
| -6.8684                |             |            |             |           |
| [31843]ENERGY: 8300000 | 3330.1248   | 5559.5365  | 5695.3434   |           |
| 324.1182               | -14340.1197 | -1830.4104 | 0.0000      | 0.0000    |
| 8037.1191              | 6775.7119   | 306.4683   | -1261.4072  | 6836.4166 |
| 307.6715               | 87.1843     | 95.1737    | 680285.8938 | -4.4406   |
| -4.4335                |             |            |             |           |
| [31893]ENERGY: 8310000 | 3327.4123   | 5340.7374  | 5744.4766   |           |
| 347.6810               | -14346.3244 | -1763.8261 | 0.0000      | 0.0000    |
| 8118.8630              | 6769.0198   | 309.5853   | -1349.8432  | 6835.2655 |
| 307.5547               | -189.8755   | -64.2445   | 680285.8938 | -8.2953   |
| -8.2687                |             |            |             |           |
| [31929]ENERGY: 8320000 | 3288.3203   | 5451.6755  | 5684.2094   |           |
| 302.1985               | -14240.5748 | -1805.1926 | 0.0000      | 0.0000    |
| 8089.1516              | 6769.7879   | 308.4524   | -1319.3637  | 6835.8653 |
| 307.2985               | -2.8502     | -22.7005   | 680285.8938 | -6.7173   |
| -6.7320                |             |            |             |           |
| [31979]ENERGY: 8330000 | 3284.5680   | 5503.7798  | 5739.7941   |           |
| 347.9811               | -14235.2879 | -1861.1112 | 0.0000      | 0.0000    |
| 7992.4351              | 6772.1592   | 304.7644   | -1220.2759  | 6837.6033 |
| 307.5223               | -12.1727    | -53.5466   | 680285.8938 | -2.7853   |
| -2.7951                |             |            |             |           |
| [32015]ENERGY: 8340000 | 3318.0216   | 5411.7422  | 5771.7311   |           |
| 334.6831               | -14303.5117 | -1837.3978 | 0.0000      | 0.0000    |
| 8074.1210              | 6769.3895   | 307.8793   | -1304.7315  | 6835.8866 |
| 307.5782               | -107.2918   | -86.6953   | 680285.8938 | -2.5452   |
| -2.5427                |             |            |             |           |
| [32065]ENERGY: 8350000 | 3363.5729   | 5379.6408  | 5748.7521   |           |
| 335.4642               | -14275.8307 | -1832.5332 | 0.0000      | 0.0000    |
| 8047.5113              | 6766.5775   | 306.8646   | -1280.9339  | 6834.7070 |
| 307.5647               | 92.8605     | 41.3744    | 680285.8938 | -6.1953   |
| -6.1912                |             |            |             |           |
| [32101]ENERGY: 8360000 | 3369.4048   | 5331.4269  | 5754.8154   |           |
| 365.7389               | -14266.8496 | -1781.0599 | 0.0000      | 0.0000    |
| 7997.0608              | 6770.5373   | 304.9408   | -1226.5235  | 6836.2512 |
| 307.4059               | 41.9411     | 18.9493    | 680285.8938 | -3.8522   |
| -3.8492                |             |            |             |           |
| [32151]ENERGY: 8370000 | 3299.9520   | 5446.9302  | 5736.4914   |           |
| 346.3750               | -14355.6231 | -1790.6735 | 0.0000      | 0.0000    |

Supplementary Text 6

|                        |             |            |             |           |
|------------------------|-------------|------------|-------------|-----------|
| 8089.9103              | 6773.3624   | 308.4813   | -1316.5479  | 6836.8625 |
| 307.5200               | 75.8847     | 14.6398    | 680285.8938 | -1.1319   |
| -1.1469                |             |            |             |           |
| [32187]ENERGY: 8380000 | 3277.3903   | 5485.6115  | 5725.0485   |           |
| 320.4559               | -14290.2298 | -1788.2868 | 0.0000      | 0.0000    |
| 8043.5126              | 6773.5022   | 306.7121   | -1270.0105  | 6836.7986 |
| 307.5938               | 189.8673    | 107.4879   | 680285.8938 | -6.0964   |
| -6.0951                |             |            |             |           |
| [32237]ENERGY: 8390000 | 3325.2268   | 5589.6035  | 5737.8195   |           |
| 330.7746               | -14397.8059 | -1895.1734 | 0.0000      | 0.0000    |
| 8080.2835              | 6770.7285   | 308.1142   | -1309.5550  | 6836.5419 |
| 307.4627               | -154.0945   | -160.1804  | 680285.8938 | -3.3810   |
| -3.3763                |             |            |             |           |
| [32276]ENERGY: 8400000 | 3286.8358   | 5398.6850  | 5759.5177   |           |
| 323.0456               | -14311.4856 | -1828.9629 | 0.0000      | 0.0000    |
| 8145.3648              | 6773.0005   | 310.5959   | -1372.3643  | 6837.2347 |
| 307.5159               | -51.5254    | -121.7341  | 680285.8938 | -8.6031   |
| -8.5903                |             |            |             |           |
| [32326]ENERGY: 8410000 | 3351.3540   | 5519.6044  | 5741.2544   |           |
| 348.7909               | -14277.3631 | -1882.5216 | 0.0000      | 0.0000    |
| 7968.5220              | 6769.6410   | 303.8526   | -1198.8810  | 6837.5205 |
| 307.7216               | -44.0656    | -40.0214   | 680285.8938 | -2.1770   |
| -2.1767                |             |            |             |           |
| [32362]ENERGY: 8420000 | 3356.5299   | 5438.8530  | 5702.6648   |           |
| 347.8829               | -14311.4739 | -1829.4983 | 0.0000      | 0.0000    |
| 8065.5175              | 6770.4760   | 307.5512   | -1295.0415  | 6837.0631 |
| 307.6027               | 19.4727     | -20.7590   | 680285.8938 | -8.0152   |
| -8.0345                |             |            |             |           |
| [32412]ENERGY: 8430000 | 3367.0725   | 5478.1957  | 5687.5357   |           |
| 333.0979               | -14305.4159 | -1800.2568 | 0.0000      | 0.0000    |
| 8017.6451              | 6777.8741   | 305.7257   | -1239.7710  | 6837.7112 |
| 307.8096               | -51.7018    | -8.6326    | 680285.8938 | -3.4882   |
| -3.4919                |             |            |             |           |
| [32448]ENERGY: 8440000 | 3324.7940   | 5461.1332  | 5750.1988   |           |
| 345.3414               | -14286.3569 | -1772.9354 | 0.0000      | 0.0000    |
| 7951.9022              | 6774.0775   | 303.2189   | -1177.8247  | 6838.1800 |
| 307.7697               | -71.4729    | -58.6820   | 680285.8938 | -7.6810   |
| -7.6771                |             |            |             |           |
| [32498]ENERGY: 8450000 | 3293.0235   | 5450.1513  | 5748.9789   |           |
| 356.1730               | -14298.7906 | -1800.1705 | 0.0000      | 0.0000    |
| 8021.1194              | 6770.4849   | 305.8582   | -1250.6345  | 6836.8917 |
| 307.6113               | 50.2248     | 60.1118    | 680285.8938 | -2.8652   |
| -2.8545                |             |            |             |           |
| [32534]ENERGY: 8460000 | 3257.6491   | 5433.9583  | 5719.8562   |           |
| 313.6525               | -14232.2535 | -1836.8326 | 0.0000      | 0.0000    |
| 8118.4429              | 6774.4729   | 309.5693   | -1343.9700  | 6836.8046 |
| 307.7240               | 87.1883     | 16.1994    | 680285.8938 | -6.1921   |
| -6.2027                |             |            |             |           |
| [32584]ENERGY: 8470000 | 3322.1865   | 5559.2431  | 5690.5310   |           |
| 342.7262               | -14362.4995 | -1852.1361 | 0.0000      | 0.0000    |
| 8073.7247              | 6773.7758   | 307.8641   | -1299.9489  | 6836.4150 |
| 307.6320               | 61.0348     | 97.6989    | 680285.8938 | -7.5621   |
| -7.5570                |             |            |             |           |
| [32620]ENERGY: 8480000 | 3301.9719   | 5393.0197  | 5740.3284   |           |

## Supplementary Text 6

|                        |             |            |             |           |
|------------------------|-------------|------------|-------------|-----------|
| 339.0631               | -14229.7494 | -1865.7417 | 0.0000      | 0.0000    |
| 8093.6100              | 6772.5020   | 308.6224   | -1321.1080  | 6838.2843 |
| 307.6432               | -34.2775    | -20.9824   | 680285.8938 | -8.2308   |
| -8.2199                |             |            |             |           |
| [32670]ENERGY: 8490000 | 3313.7382   | 5480.8662  | 5746.0501   |           |
| 327.6867               | -14383.5084 | -1785.4619 | 0.0000      | 0.0000    |
| 8072.2450              | 6771.6159   | 307.8077   | -1300.6291  | 6837.8993 |
| 307.6146               | 99.7205     | 37.6332    | 680285.8938 | -6.8680   |
| -6.8702                |             |            |             |           |
| [32709]ENERGY: 8500000 | 3309.6744   | 5508.6268  | 5741.6524   |           |
| 350.7616               | -14376.0014 | -1769.5996 | 0.0000      | 0.0000    |
| 8011.5589              | 6776.6732   | 305.4937   | -1234.8857  | 6839.1727 |
| 307.6941               | 133.3582    | 67.1730    | 680285.8938 | -6.3579   |
| -6.3726                |             |            |             |           |
| [32759]ENERGY: 8510000 | 3277.9956   | 5523.7645  | 5734.5947   |           |
| 318.5989               | -14296.6804 | -1844.0053 | 0.0000      | 0.0000    |
| 8061.6870              | 6775.9550   | 307.4051   | -1285.7320  | 6839.2767 |
| 307.8459               | 28.0436     | 51.6543    | 680285.8938 | -9.6455   |
| -9.6377                |             |            |             |           |
| [32795]ENERGY: 8520000 | 3266.8926   | 5430.5641  | 5749.4546   |           |
| 352.0250               | -14260.8979 | -1839.4738 | 0.0000      | 0.0000    |
| 8074.9128              | 6773.4773   | 307.9094   | -1301.4355  | 6839.6868 |
| 307.9285               | 42.2992     | -14.0623   | 680285.8938 | -6.6450   |
| -6.6530                |             |            |             |           |
| [32845]ENERGY: 8530000 | 3343.9990   | 5536.3351  | 5721.2584   |           |
| 342.4928               | -14320.0078 | -1869.6781 | 0.0000      | 0.0000    |
| 8018.9194              | 6773.3189   | 305.7743   | -1245.6005  | 6839.9382 |
| 307.8499               | 69.1205     | 40.0665    | 680285.8938 | -6.9152   |
| -6.9141                |             |            |             |           |
| [32881]ENERGY: 8540000 | 3295.4433   | 5535.2985  | 5717.7837   |           |
| 337.3369               | -14277.3311 | -1888.0475 | 0.0000      | 0.0000    |
| 8052.4886              | 6772.9725   | 307.0544   | -1279.5162  | 6839.6536 |
| 307.7699               | 81.1643     | 17.3851    | 680285.8938 | -7.5582   |
| -7.5632                |             |            |             |           |
| [32931]ENERGY: 8550000 | 3360.1915   | 5438.0540  | 5666.5608   |           |
| 331.6747               | -14270.3350 | -1844.4678 | 0.0000      | 0.0000    |
| 8094.9960              | 6776.6741   | 308.6753   | -1318.3219  | 6839.7074 |
| 307.7676               | 35.9211     | 24.2182    | 680285.8938 | -6.9631   |
| -6.9640                |             |            |             |           |
| [32967]ENERGY: 8560000 | 3294.3923   | 5469.7538  | 5712.7469   |           |
| 354.2695               | -14277.5963 | -1885.0393 | 0.0000      | 0.0000    |
| 8104.7439              | 6773.2708   | 309.0470   | -1331.4731  | 6839.7971 |
| 307.8769               | -86.5170    | -78.0294   | 680285.8938 | -9.0776   |
| -9.0548                |             |            |             |           |
| [33017]ENERGY: 8570000 | 3289.8320   | 5485.7367  | 5718.7402   |           |
| 360.3640               | -14280.2709 | -1859.2718 | 0.0000      | 0.0000    |
| 8060.5658              | 6775.6961   | 307.3624   | -1284.8698  | 6840.2965 |
| 307.8156               | 75.3665     | 14.5746    | 680285.8938 | -9.6277   |
| -9.6452                |             |            |             |           |
| [33053]ENERGY: 8580000 | 3379.8472   | 5476.9148  | 5716.1409   |           |
| 327.3033               | -14404.4088 | -1820.3136 | 0.0000      | 0.0000    |
| 8097.0494              | 6772.5332   | 308.7535   | -1324.5162  | 6840.8679 |
| 307.7940               | -42.2331    | -53.6471   | 680285.8938 | -6.4406   |
| -6.4266                |             |            |             |           |

Supplementary Text 6

|                        |             |            |             |           |
|------------------------|-------------|------------|-------------|-----------|
| [33103]ENERGY: 8590000 | 3372.2209   | 5420.2764  | 5726.3714   |           |
| 341.4297               | -14240.0846 | -1885.9377 | 0.0000      | 0.0000    |
| 8043.3256              | 6777.6018   | 306.7050   | -1265.7238  | 6840.7348 |
| 307.8416               | -37.7752    | -56.7267   | 680285.8938 | -7.0020   |
| -7.0237                |             |            |             |           |
| [33142]ENERGY: 8600000 | 3280.8919   | 5483.1084  | 5734.1192   |           |
| 336.3029               | -14242.7389 | -1844.5935 | 0.0000      | 0.0000    |
| 8030.3381              | 6777.4281   | 306.2097   | -1252.9100  | 6841.3198 |
| 307.7486               | -160.7502   | -91.1631   | 680285.8938 | -3.8564   |
| -3.8383                |             |            |             |           |
| [33192]ENERGY: 8610000 | 3274.8147   | 5521.3735  | 5719.1690   |           |
| 351.2894               | -14226.3089 | -1889.1415 | 0.0000      | 0.0000    |
| 8022.1679              | 6773.3642   | 305.8982   | -1248.8038  | 6841.4936 |
| 307.6662               | -34.3739    | -38.1281   | 680285.8938 | -6.7821   |
| -6.7738                |             |            |             |           |
| [33228]ENERGY: 8620000 | 3365.8034   | 5425.1840  | 5715.7058   |           |
| 318.9042               | -14260.1580 | -1863.4734 | 0.0000      | 0.0000    |
| 8073.1796              | 6775.1456   | 307.8434   | -1298.0340  | 6841.6150 |
| 307.8005               | 55.0094     | 9.6091     | 680285.8938 | -6.1705   |
| -6.1785                |             |            |             |           |
| [33278]ENERGY: 8630000 | 3336.2314   | 5473.6213  | 5688.7357   |           |
| 332.5310               | -14386.6496 | -1740.2810 | 0.0000      | 0.0000    |
| 8069.8946              | 6774.0834   | 307.7181   | -1295.8112  | 6839.6201 |
| 307.8032               | 165.8162    | 130.2257   | 680285.8938 | -6.7911   |
| -6.7903                |             |            |             |           |
| [33314]ENERGY: 8640000 | 3345.8959   | 5493.9130  | 5691.1503   |           |
| 321.5629               | -14297.0015 | -1919.5011 | 0.0000      | 0.0000    |
| 8138.4820              | 6774.5014   | 310.3334   | -1363.9805  | 6841.6745 |
| 307.7413               | -49.9216    | -10.1689   | 680285.8938 | -6.1733   |
| -6.1812                |             |            |             |           |
| [33364]ENERGY: 8650000 | 3293.0170   | 5410.6351  | 5734.2144   |           |
| 331.4552               | -14344.4565 | -1828.1538 | 0.0000      | 0.0000    |
| 8176.6268              | 6773.3382   | 311.7880   | -1403.2887  | 6841.3474 |
| 307.6857               | 162.1697    | 72.4745    | 680285.8938 | -2.1617   |
| -2.1599                |             |            |             |           |
| [33400]ENERGY: 8660000 | 3320.7787   | 5395.2395  | 5737.1800   |           |
| 340.1815               | -14314.0513 | -1844.6901 | 0.0000      | 0.0000    |
| 8140.6602              | 6775.2986   | 310.4165   | -1365.3616  | 6841.3815 |
| 307.7360               | 165.1877    | 76.2172    | 680285.8938 | -12.5811  |
| -12.5767               |             |            |             |           |
| [33450]ENERGY: 8670000 | 3319.7024   | 5405.3458  | 5764.0383   |           |
| 349.3334               | -14264.0966 | -1816.9032 | 0.0000      | 0.0000    |
| 8020.4319              | 6777.8519   | 305.8320   | -1242.5799  | 6841.5590 |
| 307.8106               | 56.5666     | 30.6923    | 680285.8938 | -6.2523   |
| -6.2427                |             |            |             |           |
| [33486]ENERGY: 8680000 | 3401.4327   | 5441.1331  | 5760.8887   |           |
| 330.6721               | -14378.3112 | -1821.2832 | 0.0000      | 0.0000    |
| 8039.5325              | 6774.0646   | 306.5603   | -1265.4678  | 6841.3726 |
| 307.6923               | -75.7233    | -17.8771   | 680285.8938 | -8.8884   |
| -8.9104                |             |            |             |           |
| [33536]ENERGY: 8690000 | 3369.5909   | 5416.4442  | 5728.5711   |           |
| 349.6961               | -14253.4271 | -1789.5678 | 0.0000      | 0.0000    |
| 7954.3072              | 6775.6145   | 303.3106   | -1178.6926  | 6840.5388 |
| 307.7038               | 22.7069     | 13.2839    | 680285.8938 | -7.6956   |



Supplementary Text 6

-7.6912

|                        |             |            |                      |
|------------------------|-------------|------------|----------------------|
| [33575]ENERGY: 8700000 | 3348.4265   | 5576.1572  | 5707.2224            |
| 327.6072               | -14341.6413 | -1852.4149 | 0.0000 0.0000        |
| 8012.4220              | 6777.7789   | 305.5266   | -1234.6431 6839.8173 |
| 307.5876               | -198.1858   | -33.1887   | 680285.8938 -6.3915  |

-6.3658

|                        |             |            |                      |
|------------------------|-------------|------------|----------------------|
| [33625]ENERGY: 8710000 | 3281.9894   | 5456.4925  | 5706.1502            |
| 337.8530               | -14283.9233 | -1854.1562 | 0.0000 0.0000        |
| 8129.0265              | 6773.4321   | 309.9729   | -1355.5944 6841.3942 |
| 307.7673               | -117.2230   | -55.7004   | 680285.8938 -9.3822  |

-9.3874

|                        |             |            |                      |
|------------------------|-------------|------------|----------------------|
| [33661]ENERGY: 8720000 | 3404.7229   | 5436.8461  | 5706.7291            |
| 340.5255               | -14303.8191 | -1838.5961 | 0.0000 0.0000        |
| 8031.6418              | 6778.0503   | 306.2595   | -1253.5915 6843.8707 |
| 307.6885               | -8.0067     | 67.6011    | 680285.8938 -7.2786  |

-7.2951

|                        |             |            |                      |
|------------------------|-------------|------------|----------------------|
| [33711]ENERGY: 8730000 | 3352.5197   | 5462.7619  | 5701.2790            |
| 353.8158               | -14284.8155 | -1867.8891 | 0.0000 0.0000        |
| 8060.7950              | 6778.4670   | 307.3711   | -1282.3281 6844.2759 |
| 307.7672               | -66.5566    | -91.8772   | 680285.8938 -10.6384 |

-10.6345

|                        |             |            |                      |
|------------------------|-------------|------------|----------------------|
| [33747]ENERGY: 8740000 | 3299.3303   | 5477.5948  | 5727.7987            |
| 334.4068               | -14267.8274 | -1853.9535 | 0.0000 0.0000        |
| 8062.4978              | 6779.8476   | 307.4360   | -1282.6502 6844.3632 |
| 307.9049               | -37.5398    | -52.2757   | 680285.8938 -5.7974  |

-5.7918

|                        |             |            |                      |
|------------------------|-------------|------------|----------------------|
| [33797]ENERGY: 8750000 | 3307.3209   | 5469.9834  | 5646.8945            |
| 339.1350               | -14222.4039 | -1825.0624 | 0.0000 0.0000        |
| 8068.2822              | 6784.1497   | 307.6566   | -1284.1325 6845.6402 |
| 307.8338               | -11.7721    | -108.0643  | 680285.8938 -9.1074  |

-9.1210

|                        |             |            |                      |
|------------------------|-------------|------------|----------------------|
| [33833]ENERGY: 8760000 | 3354.5437   | 5481.9830  | 5706.8626            |
| 325.1228               | -14257.5659 | -1860.2179 | 0.0000 0.0000        |
| 8028.2105              | 6778.9389   | 306.1286   | -1249.2716 6844.6517 |
| 307.8094               | 48.9241     | 32.4214    | 680285.8938 -9.3775  |

-9.3719

|                        |             |            |                      |
|------------------------|-------------|------------|----------------------|
| [33883]ENERGY: 8770000 | 3334.9485   | 5466.2682  | 5778.6867            |
| 331.8179               | -14327.8753 | -1847.3627 | 0.0000 0.0000        |
| 8046.5697              | 6783.0530   | 306.8287   | -1263.5167 6845.0042 |
| 308.0239               | -101.3797   | -63.9746   | 680285.8938 -6.3919  |

-6.3882

|                        |             |            |                      |
|------------------------|-------------|------------|----------------------|
| [33919]ENERGY: 8780000 | 3327.8934   | 5439.0465  | 5694.0760            |
| 332.8390               | -14235.5535 | -1857.9265 | 0.0000 0.0000        |
| 8080.1836              | 6780.5586   | 308.1104   | -1299.6251 6845.5184 |
| 307.8084               | 18.5777     | 32.1390    | 680285.8938 -7.7270  |

-7.7369

|                        |             |            |                      |
|------------------------|-------------|------------|----------------------|
| [33969]ENERGY: 8790000 | 3362.6186   | 5413.8485  | 5716.0043            |
| 346.5518               | -14255.2289 | -1885.5072 | 0.0000 0.0000        |
| 8081.9805              | 6780.2676   | 308.1789   | -1301.7129 6846.2623 |
| 307.8691               | 72.7017     | 11.0796    | 680285.8938 -6.1066  |

-6.1089

|                        |             |            |                      |
|------------------------|-------------|------------|----------------------|
| [34008]ENERGY: 8800000 | 3306.6660   | 5458.4889  | 5686.9460            |
| 337.9371               | -14271.8305 | -1842.1764 | 0.0000 0.0000        |
| 8104.2415              | 6780.2724   | 309.0278   | -1323.9691 6845.7990 |

## Supplementary Text 6

|                        |             |            |             |           |
|------------------------|-------------|------------|-------------|-----------|
| 307.8888               | 99.6998     | 31.7372    | 680285.8938 | -7.9190   |
| -7.9004                |             |            |             |           |
| [34058]ENERGY: 8810000 | 3357.2751   | 5470.5324  | 5750.7344   |           |
| 320.0553               | -14320.8370 | -1818.3022 | 0.0000      | 0.0000    |
| 8023.3487              | 6782.8067   | 305.9432   | -1240.5420  | 6846.0317 |
| 307.9983               | -49.3247    | -59.7520   | 680285.8938 | -8.8267   |
| -8.8446                |             |            |             |           |
| [34094]ENERGY: 8820000 | 3330.2523   | 5516.9765  | 5762.3043   |           |
| 344.9354               | -14339.6047 | -1835.5472 | 0.0000      | 0.0000    |
| 8003.7240              | 6783.0406   | 305.1949   | -1220.6834  | 6846.6607 |
| 307.9453               | -135.6354   | -54.1733   | 680285.8938 | -7.4705   |
| -7.4600                |             |            |             |           |
| [34144]ENERGY: 8830000 | 3331.7417   | 5410.7942  | 5711.3824   |           |
| 349.9557               | -14277.3472 | -1838.6336 | 0.0000      | 0.0000    |
| 8095.9349              | 6783.8281   | 308.7111   | -1312.1068  | 6848.8672 |
| 307.7385               | 167.1247    | 108.5133   | 680285.8938 | -8.3548   |
| -8.3578                |             |            |             |           |
| [34180]ENERGY: 8840000 | 3394.8299   | 5434.1545  | 5687.6720   |           |
| 317.8312               | -14231.4519 | -1866.4303 | 0.0000      | 0.0000    |
| 8045.3547              | 6781.9603   | 306.7823   | -1263.3945  | 6848.6972 |
| 307.8376               | -10.0418    | -70.1993   | 680285.8938 | -9.1393   |
| -9.1362                |             |            |             |           |
| [34230]ENERGY: 8850000 | 3366.1766   | 5485.1388  | 5673.8079   |           |
| 335.2938               | -14253.3294 | -1883.0076 | 0.0000      | 0.0000    |
| 8056.3488              | 6780.4288   | 307.2016   | -1275.9199  | 6847.5184 |
| 307.9302               | -181.3306   | -82.9441   | 680285.8938 | -6.9603   |
| -6.9660                |             |            |             |           |
| [34266]ENERGY: 8860000 | 3389.3836   | 5482.1308  | 5722.3538   |           |
| 325.5253               | -14374.1671 | -1804.7099 | 0.0000      | 0.0000    |
| 8041.3039              | 6781.8204   | 306.6279   | -1259.4835  | 6847.6653 |
| 308.0511               | -68.2871    | -32.5162   | 680285.8938 | -5.4148   |
| -5.4141                |             |            |             |           |
| [34316]ENERGY: 8870000 | 3356.3402   | 5438.0338  | 5729.8189   |           |
| 342.9763               | -14332.4956 | -1787.1958 | 0.0000      | 0.0000    |
| 8036.9094              | 6784.3872   | 306.4603   | -1252.5222  | 6847.3625 |
| 307.9639               | -104.5334   | -158.4269  | 680285.8938 | -7.7848   |
| -7.8018                |             |            |             |           |
| [34352]ENERGY: 8880000 | 3345.0235   | 5454.8933  | 5691.2017   |           |
| 332.1017               | -14207.2015 | -1802.1044 | 0.0000      | 0.0000    |
| 7971.8185              | 6785.7328   | 303.9783   | -1186.0857  | 6848.5895 |
| 307.9104               | 94.8144     | 41.8549    | 680285.8938 | -4.6939   |
| -4.6762                |             |            |             |           |
| [34402]ENERGY: 8890000 | 3302.5427   | 5520.5942  | 5691.1081   |           |
| 350.8377               | -14275.6644 | -1842.1094 | 0.0000      | 0.0000    |
| 8038.1645              | 6785.4733   | 306.5082   | -1252.6911  | 6849.5471 |
| 308.0345               | -8.5459     | -40.9391   | 680285.8938 | -6.1016   |
| -6.1156                |             |            |             |           |
| [34441]ENERGY: 8900000 | 3367.6457   | 5432.2863  | 5681.5870   |           |
| 326.7770               | -14295.1553 | -1811.2596 | 0.0000      | 0.0000    |
| 8082.4568              | 6784.3379   | 308.1971   | -1298.1189  | 6850.5417 |
| 307.8066               | -70.7446    | -107.0244  | 680285.8938 | -9.8227   |
| -9.8065                |             |            |             |           |
| [34491]ENERGY: 8910000 | 3251.9710   | 5451.1941  | 5713.8866   |           |
| 339.4117               | -14346.2692 | -1834.9410 | 0.0000      | 0.0000    |

## Supplementary Text 6

|                        |             |            |             |           |
|------------------------|-------------|------------|-------------|-----------|
| 8206.8120              | 6782.0652   | 312.9390   | -1424.7468  | 6850.4681 |
| 307.7450               | 61.0898     | 25.8372    | 680285.8938 | -12.5008  |
| -12.4970               |             |            |             |           |
| [34527]ENERGY: 8920000 | 3304.7656   | 5558.7729  | 5663.2641   |           |
| 337.6843               | -14401.2910 | -1732.4288 | 0.0000      | 0.0000    |
| 8055.3433              | 6786.1103   | 307.1632   | -1269.2329  | 6849.9301 |
| 307.8740               | 92.9785     | 80.9558    | 680285.8938 | -9.9922   |
| -9.9938                |             |            |             |           |
| [34577]ENERGY: 8930000 | 3350.5731   | 5469.3965  | 5707.4996   |           |
| 309.5467               | -14272.3569 | -1846.2442 | 0.0000      | 0.0000    |
| 8067.3223              | 6785.7372   | 307.6200   | -1281.5852  | 6850.2884 |
| 307.9834               | -65.7548    | -33.1091   | 680285.8938 | -10.9510  |
| -10.9529               |             |            |             |           |
| [34613]ENERGY: 8940000 | 3241.5553   | 5543.1839  | 5703.0323   |           |
| 347.6691               | -14306.8426 | -1763.4907 | 0.0000      | 0.0000    |
| 8021.2918              | 6786.3992   | 305.8648   | -1234.8926  | 6850.7739 |
| 308.0537               | 82.5683     | 125.8667   | 680285.8938 | -10.2979  |
| -10.3135               |             |            |             |           |
| [34663]ENERGY: 8950000 | 3332.4937   | 5458.9200  | 5676.0075   |           |
| 347.4773               | -14314.2146 | -1816.4827 | 0.0000      | 0.0000    |
| 8097.7359              | 6781.9372   | 308.7797   | -1315.7987  | 6849.5843 |
| 307.9440               | 40.8311     | 52.6018    | 680285.8938 | -9.1039   |
| -9.0777                |             |            |             |           |
| [34699]ENERGY: 8960000 | 3371.9228   | 5443.2325  | 5701.0885   |           |
| 335.2097               | -14355.9258 | -1787.9307 | 0.0000      | 0.0000    |
| 8079.0032              | 6786.6002   | 308.0654   | -1292.4031  | 6848.9186 |
| 307.9530               | -49.4100    | -33.1497   | 680285.8938 | -11.8591  |
| -11.8696               |             |            |             |           |
| [34749]ENERGY: 8970000 | 3297.1894   | 5476.7268  | 5693.4089   |           |
| 350.1268               | -14228.7286 | -1934.5619 | 0.0000      | 0.0000    |
| 8131.1433              | 6785.3048   | 310.0536   | -1345.8385  | 6851.0317 |
| 307.9894               | 89.8605     | 48.6949    | 680285.8938 | -12.4096  |
| -12.4104               |             |            |             |           |
| [34785]ENERGY: 8980000 | 3353.6349   | 5490.2446  | 5744.7957   |           |
| 330.2773               | -14311.2630 | -1801.0807 | 0.0000      | 0.0000    |
| 7979.7674              | 6786.3763   | 304.2814   | -1193.3912  | 6850.6858 |
| 307.8716               | -163.6494   | -96.8211   | 680285.8938 | -12.0305  |
| -12.0173               |             |            |             |           |
| [34835]ENERGY: 8990000 | 3279.7027   | 5402.4080  | 5795.7413   |           |
| 344.7934               | -14281.4237 | -1771.4487 | 0.0000      | 0.0000    |
| 8013.9259              | 6783.6989   | 305.5839   | -1230.2270  | 6849.8737 |
| 307.7120               | -28.9712    | -38.4141   | 680285.8938 | -10.3350  |
| -10.3534               |             |            |             |           |
| [34874]ENERGY: 9000000 | 3372.5597   | 5438.4235  | 5787.5858   |           |
| 329.9529               | -14328.3413 | -1879.5728 | 0.0000      | 0.0000    |
| 8066.7754              | 6787.3831   | 307.5992   | -1279.3923  | 6851.3584 |
| 307.9794               | 81.5908     | 45.2720    | 680285.8938 | -14.5684  |
| -14.5746               |             |            |             |           |
| [34924]ENERGY: 9010000 | 3284.9649   | 5594.8038  | 5684.4551   |           |
| 354.6334               | -14468.2313 | -1713.2467 | 0.0000      | 0.0000    |
| 8045.6995              | 6783.0787   | 306.7955   | -1262.6208  | 6849.9341 |
| 307.9844               | 155.7862    | 27.1648    | 680285.8938 | -9.2602   |
| -9.2633                |             |            |             |           |
| [34960]ENERGY: 9020000 | 3294.9608   | 5572.7717  | 5704.8763   |           |

## Supplementary Text 6

|                        |             |            |             |           |
|------------------------|-------------|------------|-------------|-----------|
| 341.4219               | -14347.8206 | -1808.3663 | 0.0000      | 0.0000    |
| 8029.1162              | 6786.9600   | 306.1631   | -1242.1562  | 6850.8048 |
| 307.9569               | 23.7316     | 56.0065    | 680285.8938 | -10.6731  |
| -10.6719               |             |            |             |           |
| [35010]ENERGY: 9030000 | 3377.5831   | 5399.4306  | 5767.4109   |           |
| 373.7037               | -14343.8250 | -1818.1685 | 0.0000      | 0.0000    |
| 8029.8093              | 6785.9441   | 306.1896   | -1243.8652  | 6850.1102 |
| 307.9048               | -74.2013    | -149.3545  | 680285.8938 | -9.7635   |
| -9.7674                |             |            |             |           |
| [35046]ENERGY: 9040000 | 3373.8383   | 5414.8822  | 5694.0908   |           |
| 353.9161               | -14305.2977 | -1784.9776 | 0.0000      | 0.0000    |
| 8039.5572              | 6786.0092   | 306.5613   | -1253.5479  | 6848.8218 |
| 307.8533               | -44.5750    | -63.6302   | 680285.8938 | -8.1117   |
| -8.0989                |             |            |             |           |
| [35096]ENERGY: 9050000 | 3322.5969   | 5458.8757  | 5722.6624   |           |
| 344.5893               | -14315.5063 | -1839.2919 | 0.0000      | 0.0000    |
| 8089.4701              | 6783.3961   | 308.4645   | -1306.0739  | 6850.9744 |
| 307.7499               | 36.4771     | -3.6826    | 680285.8938 | -12.2873  |
| -12.2640               |             |            |             |           |
| [35132]ENERGY: 9060000 | 3286.8750   | 5437.9527  | 5781.6597   |           |
| 358.9987               | -14269.7340 | -1833.3805 | 0.0000      | 0.0000    |
| 8018.2037              | 6780.5754   | 305.7470   | -1237.6284  | 6850.9910 |
| 307.6902               | -16.2488    | -76.8120   | 680285.8938 | -11.1213  |
| -11.1344               |             |            |             |           |
| [35182]ENERGY: 9070000 | 3273.2750   | 5455.2053  | 5734.0069   |           |
| 320.3666               | -14309.6206 | -1774.3998 | 0.0000      | 0.0000    |
| 8086.9775              | 6785.8107   | 308.3695   | -1301.1667  | 6850.3384 |
| 308.0439               | 122.3519    | 15.0679    | 680285.8938 | -13.1481  |
| -13.1436               |             |            |             |           |
| [35218]ENERGY: 9080000 | 3358.7851   | 5528.8056  | 5677.5549   |           |
| 333.2576               | -14377.3161 | -1817.4063 | 0.0000      | 0.0000    |
| 8080.4723              | 6784.1531   | 308.1214   | -1296.3192  | 6850.5057 |
| 308.0771               | -19.6879    | 29.8310    | 680285.8938 | -9.3046   |
| -9.3209                |             |            |             |           |
| [35268]ENERGY: 9090000 | 3328.5740   | 5514.0036  | 5722.3552   |           |
| 347.3293               | -14300.7202 | -1869.2289 | 0.0000      | 0.0000    |
| 8041.1703              | 6783.4833   | 306.6228   | -1257.6870  | 6850.1159 |
| 308.0111               | -250.4952   | -211.8951  | 680285.8938 | -9.9532   |
| -9.9595                |             |            |             |           |
| [35307]ENERGY: 9100000 | 3275.7127   | 5374.8684  | 5745.0949   |           |
| 361.4087               | -14284.9069 | -1782.3879 | 0.0000      | 0.0000    |
| 8092.5893              | 6782.3792   | 308.5835   | -1310.2101  | 6850.1430 |
| 308.1078               | 135.9988    | 114.7621   | 680285.8938 | -10.6902  |
| -10.6870               |             |            |             |           |
| [35357]ENERGY: 9110000 | 3310.7326   | 5540.7443  | 5744.9113   |           |
| 339.8838               | -14412.8606 | -1820.7401 | 0.0000      | 0.0000    |
| 8081.5516              | 6784.2229   | 308.1626   | -1297.3287  | 6851.2648 |
| 308.1468               | 12.2298     | 9.2322     | 680285.8938 | -12.8639  |
| -12.8667               |             |            |             |           |
| [35393]ENERGY: 9120000 | 3322.8528   | 5355.6353  | 5717.1663   |           |
| 326.1751               | -14276.6783 | -1787.5847 | 0.0000      | 0.0000    |
| 8125.9694              | 6783.5360   | 309.8563   | -1342.4335  | 6850.8472 |
| 308.0917               | 125.5499    | 108.5509   | 680285.8938 | -12.4990  |
| -12.4812               |             |            |             |           |

## Supplementary Text 6

|                        |             |            |             |           |
|------------------------|-------------|------------|-------------|-----------|
| [35443]ENERGY: 9130000 | 3306.0317   | 5597.5490  | 5710.0461   |           |
| 338.1879               | -14356.2400 | -1829.9602 | 0.0000      | 0.0000    |
| 8016.6549              | 6782.2693   | 305.6880   | -1234.3856  | 6851.0739 |
| 308.2409               | 61.5526     | 33.5216    | 680285.8938 | -11.9488  |
| -11.9455               |             |            |             |           |
| [35479]ENERGY: 9140000 | 3318.1100   | 5516.0125  | 5755.4409   |           |
| 339.6506               | -14359.8294 | -1816.3966 | 0.0000      | 0.0000    |
| 8035.6144              | 6788.6024   | 306.4109   | -1247.0120  | 6850.7099 |
| 308.2814               | 53.1380     | -49.5167   | 680285.8938 | -11.9449  |
| -11.9545               |             |            |             |           |
| [35529]ENERGY: 9150000 | 3302.4025   | 5448.6952  | 5781.8661   |           |
| 328.3865               | -14353.3853 | -1817.3159 | 0.0000      | 0.0000    |
| 8094.8373              | 6785.4863   | 308.6692   | -1309.3510  | 6850.3264 |
| 308.3415               | 26.3110     | -60.5046   | 680285.8938 | -12.3844  |
| -12.3742               |             |            |             |           |
| [35565]ENERGY: 9160000 | 3324.1178   | 5521.0018  | 5692.5314   |           |
| 341.5990               | -14323.5550 | -1836.2299 | 0.0000      | 0.0000    |
| 8065.2896              | 6784.7548   | 307.5425   | -1280.5348  | 6850.8801 |
| 308.4380               | -24.8730    | -4.8809    | 680285.8938 | -16.1642  |
| -16.1845               |             |            |             |           |
| [35615]ENERGY: 9170000 | 3285.1701   | 5473.8518  | 5762.6878   |           |
| 330.2733               | -14378.7369 | -1769.3733 | 0.0000      | 0.0000    |
| 8080.0179              | 6783.8908   | 308.1041   | -1296.1271  | 6850.8991 |
| 308.2077               | 105.1129    | 42.6585    | 680285.8938 | -16.6986  |
| -16.6882               |             |            |             |           |
| [35651]ENERGY: 9180000 | 3322.9884   | 5479.1649  | 5702.2676   |           |
| 335.6748               | -14356.2715 | -1843.6659 | 0.0000      | 0.0000    |
| 8145.4234              | 6785.5816   | 310.5981   | -1359.8417  | 6850.5883 |
| 308.2060               | 55.5572     | 91.6599    | 680285.8938 | -17.8390  |
| -17.8409               |             |            |             |           |
| [35701]ENERGY: 9190000 | 3334.5677   | 5446.6598  | 5688.5268   |           |
| 331.7799               | -14269.2188 | -1859.7096 | 0.0000      | 0.0000    |
| 8112.8352              | 6785.4410   | 309.3555   | -1327.3941  | 6850.9862 |
| 308.3437               | 60.7423     | 107.6596   | 680285.8938 | -13.2596  |
| -13.2579               |             |            |             |           |
| [35740]ENERGY: 9200000 | 3356.5970   | 5565.7523  | 5681.8191   |           |
| 338.7915               | -14347.0676 | -1844.4452 | 0.0000      | 0.0000    |
| 8037.9076              | 6789.3546   | 306.4984   | -1248.5529  | 6852.4586 |
| 308.3065               | 17.3756     | -60.9653   | 680285.8938 | -13.8293  |
| -13.8361               |             |            |             |           |
| [35790]ENERGY: 9210000 | 3344.4748   | 5462.0930  | 5729.7987   |           |
| 368.1211               | -14418.4778 | -1800.4862 | 0.0000      | 0.0000    |
| 8099.7899              | 6785.3137   | 308.8581   | -1314.4762  | 6850.5947 |
| 308.5417               | -30.6495    | 1.4785     | 680285.8938 | -12.0616  |
| -12.0524               |             |            |             |           |
| [35826]ENERGY: 9220000 | 3357.2340   | 5528.1178  | 5725.9653   |           |
| 348.3547               | -14349.2502 | -1857.2305 | 0.0000      | 0.0000    |
| 8035.4038              | 6788.5949   | 306.4029   | -1246.8089  | 6853.0603 |
| 308.3798               | -77.4910    | -145.2502  | 680285.8938 | -14.1815  |
| -14.1926               |             |            |             |           |
| [35876]ENERGY: 9230000 | 3369.6288   | 5517.0715  | 5696.9092   |           |
| 347.5937               | -14387.3923 | -1762.0089 | 0.0000      | 0.0000    |
| 8009.0751              | 6790.8771   | 305.3989   | -1218.1980  | 6854.1373 |
| 308.4838               | 144.0914    | 78.1043    | 680285.8938 | -17.5726  |

Supplementary Text 6

-17.5661  
 [35912]ENERGY: 9240000      3299.4350      5437.9513      5753.8109  
 312.7214      -14309.8684      -1829.4877      0.0000      0.0000  
 8124.4818      6789.0442      309.7996      -1335.4376      6854.0507  
 308.3938      -100.8505      -122.0954      680285.8938      -10.1439  
 -10.1593  
 [35962]ENERGY: 9250000      3362.7376      5410.1772      5710.4435  
 343.7786      -14300.6279      -1830.9833      0.0000      0.0000  
 8091.2844      6786.8101      308.5337      -1304.4743      6852.7104  
 308.3718      -74.1168      -97.5587      680285.8938      -14.0552  
 -14.0398  
 [35998]ENERGY: 9260000      3316.1925      5418.1915      5760.8055  
 352.7598      -14362.2002      -1830.9849      0.0000      0.0000  
 8129.4315      6784.1956      309.9883      -1345.2360      6854.3719  
 308.3665      88.8646      -4.6356      680285.8938      -15.1326  
 -15.1208  
 [36048]ENERGY: 9270000      3269.0369      5524.9169      5745.5957  
 338.8275      -14278.3488      -1828.8484      0.0000      0.0000  
 8016.9905      6788.1703      305.7008      -1228.8203      6852.4329  
 308.5525      35.4274      46.1929      680285.8938      -10.9027  
 -10.9071  
 [36084]ENERGY: 9280000      3386.9377      5508.0050      5718.7591  
 309.6522      -14407.3401      -1828.4543      0.0000      0.0000  
 8095.6961      6783.2557      308.7019      -1312.4404      6852.0713  
 308.3329      -108.5975      -79.7890      680285.8938      -11.2446  
 -11.2508  
 [36134]ENERGY: 9290000      3361.1452      5461.9327      5785.7330  
 333.4891      -14424.4888      -1832.8624      0.0000      0.0000  
 8105.7606      6790.7093      309.0857      -1315.0513      6852.9003  
 308.5168      -17.2085      -21.2863      680285.8938      -11.9468  
 -11.9540  
 [36173]ENERGY: 9300000      3347.4443      5461.4751      5712.7198  
 321.3632      -14350.3391      -1806.0214      0.0000      0.0000  
 8102.1714      6788.8133      308.9489      -1313.3581      6853.3765  
 308.4458      -13.3741      -4.7799      680285.8938      -14.1494  
 -14.1475  
 [36223]ENERGY: 9310000      3381.4467      5451.2980      5758.3317  
 372.8398      -14311.9357      -1853.5584      0.0000      0.0000  
 7992.8144      6791.2364      304.7789      -1201.5780      6854.1847  
 308.5400      69.9942      -12.7506      680285.8938      -10.7348  
 -10.7139  
 [36259]ENERGY: 9320000      3290.1529      5470.6771      5747.1172  
 310.0610      -14349.9445      -1837.2174      0.0000      0.0000  
 8154.0177      6784.8640      310.9258      -1369.1537      6853.4396  
 308.5357      150.2102      129.4957      680285.8938      -13.4464  
 -13.4769  
 [36309]ENERGY: 9330000      3319.9142      5565.7001      5735.3589  
 339.3507      -14427.7884      -1794.4347      0.0000      0.0000  
 8049.4560      6787.5567      306.9387      -1261.8993      6853.3734  
 308.6216      -57.7348      -87.6053      680285.8938      -15.6930  
 -15.6936  
 [36345]ENERGY: 9340000      3338.7574      5484.6149      5697.6197  
 339.3610      -14341.1502      -1789.7516      0.0000      0.0000  
 8060.6364      6790.0876      307.3651      -1270.5488      6853.8067

## Supplementary Text 6

|                        |             |            |             |           |
|------------------------|-------------|------------|-------------|-----------|
| 308.4882               | -31.9707    | -11.5335   | 680285.8938 | -13.9876  |
| -13.9727               |             |            |             |           |
| [36395]ENERGY: 9350000 | 3362.8567   | 5426.7904  | 5753.9086   |           |
| 355.7012               | -14310.1336 | -1867.5978 | 0.0000      | 0.0000    |
| 8069.2544              | 6790.7798   | 307.6937   | -1278.4746  | 6854.3827 |
| 308.4738               | -79.5634    | -67.1527   | 680285.8938 | -17.5000  |
| -17.4900               |             |            |             |           |
| [36431]ENERGY: 9360000 | 3295.2569   | 5448.9878  | 5738.4335   |           |
| 329.3368               | -14355.8083 | -1764.4682 | 0.0000      | 0.0000    |
| 8097.3669              | 6789.1053   | 308.7657   | -1308.2616  | 6853.6564 |
| 308.4332               | 26.5592     | 22.7638    | 680285.8938 | -18.2546  |
| -18.2659               |             |            |             |           |
| [36481]ENERGY: 9370000 | 3323.4108   | 5345.2653  | 5681.7963   |           |
| 348.6283               | -14291.8492 | -1758.4695 | 0.0000      | 0.0000    |
| 8141.6088              | 6790.3909   | 310.4527   | -1351.2179  | 6852.6400 |
| 308.4721               | 125.1614    | 94.7765    | 680285.8938 | -17.5597  |
| -17.5618               |             |            |             |           |
| [36517]ENERGY: 9380000 | 3257.1025   | 5551.7922  | 5740.0870   |           |
| 339.6651               | -14421.4842 | -1807.8050 | 0.0000      | 0.0000    |
| 8124.2620              | 6783.6197   | 309.7912   | -1340.6423  | 6852.3580 |
| 308.4653               | 83.0569     | 95.8601    | 680285.8938 | -11.3403  |
| -11.3296               |             |            |             |           |
| [36567]ENERGY: 9390000 | 3297.9992   | 5461.0322  | 5719.2157   |           |
| 363.7541               | -14255.9036 | -1876.3646 | 0.0000      | 0.0000    |
| 8081.0458              | 6790.7788   | 308.1433   | -1290.2670  | 6854.3021 |
| 308.2568               | -150.5969   | -73.0836   | 680285.8938 | -19.3477  |
| -19.3364               |             |            |             |           |
| [36606]ENERGY: 9400000 | 3362.9607   | 5435.1422  | 5729.8416   |           |
| 347.4834               | -14311.0890 | -1853.4629 | 0.0000      | 0.0000    |
| 8077.4928              | 6788.3687   | 308.0078   | -1289.1241  | 6853.8858 |
| 308.3363               | -37.9699    | -101.0738  | 680285.8938 | -16.3267  |
| -16.3454               |             |            |             |           |
| [36656]ENERGY: 9410000 | 3237.2656   | 5470.2910  | 5752.0196   |           |
| 331.7002               | -14311.4104 | -1808.7877 | 0.0000      | 0.0000    |
| 8113.9090              | 6784.9873   | 309.3964   | -1328.9217  | 6853.1955 |
| 308.4925               | 91.9036     | 84.9852    | 680285.8938 | -17.7187  |
| -17.7004               |             |            |             |           |
| [36692]ENERGY: 9420000 | 3420.3992   | 5388.6517  | 5740.2687   |           |
| 353.0107               | -14347.4982 | -1774.8197 | 0.0000      | 0.0000    |
| 8009.4224              | 6789.4348   | 305.4122   | -1219.9876  | 6853.2795 |
| 308.3784               | 72.3663     | -20.3369   | 680285.8938 | -18.0548  |
| -18.0617               |             |            |             |           |
| [36742]ENERGY: 9430000 | 3232.4958   | 5482.5994  | 5761.6723   |           |
| 374.9713               | -14334.6745 | -1802.6225 | 0.0000      | 0.0000    |
| 8073.9019              | 6788.3438   | 307.8709   | -1285.5581  | 6855.1296 |
| 308.4145               | 197.4069    | 147.6214   | 680285.8938 | -14.2303  |
| -14.2399               |             |            |             |           |
| [36778]ENERGY: 9440000 | 3286.6605   | 5497.1970  | 5775.1016   |           |
| 331.3879               | -14333.5392 | -1801.1853 | 0.0000      | 0.0000    |
| 8039.3465              | 6794.9690   | 306.5532   | -1244.3775  | 6854.9632 |
| 308.3952               | 129.5823    | 129.9832   | 680285.8938 | -18.3150  |
| -18.3297               |             |            |             |           |
| [36828]ENERGY: 9450000 | 3343.0981   | 5379.6164  | 5754.4010   |           |
| 356.9473               | -14288.3514 | -1810.4146 | 0.0000      | 0.0000    |

## Supplementary Text 6

|                        |             |            |             |           |
|------------------------|-------------|------------|-------------|-----------|
| 8054.1544              | 6789.4511   | 307.1179   | -1264.7033  | 6855.3989 |
| 308.3625               | -81.1717    | -118.1860  | 680285.8938 | -17.3298  |
| -17.3129               |             |            |             |           |
| [36864]ENERGY: 9460000 | 3273.5679   | 5444.9122  | 5724.4876   |           |
| 325.3728               | -14321.6243 | -1827.4133 | 0.0000      | 0.0000    |
| 8169.0514              | 6788.3542   | 311.4991   | -1380.6972  | 6855.8254 |
| 308.4994               | 152.2092    | 78.6101    | 680285.8938 | -16.5170  |
| -16.5363               |             |            |             |           |
| [36914]ENERGY: 9470000 | 3295.1011   | 5437.1537  | 5679.1498   |           |
| 356.0173               | -14336.4723 | -1767.2285 | 0.0000      | 0.0000    |
| 8127.2402              | 6790.9612   | 309.9048   | -1336.2789  | 6856.4448 |
| 308.5182               | -26.1263    | -22.8335   | 680285.8938 | -15.7879  |
| -15.7576               |             |            |             |           |
| [36950]ENERGY: 9480000 | 3340.9777   | 5494.5879  | 5681.5081   |           |
| 341.3276               | -14322.0705 | -1836.8382 | 0.0000      | 0.0000    |
| 8095.4243              | 6794.9169   | 308.6916   | -1300.5074  | 6856.4016 |
| 308.5174               | 109.8081    | -67.9174   | 680285.8938 | -19.3899  |
| -19.4059               |             |            |             |           |
| [37000]ENERGY: 9490000 | 3333.2454   | 5415.2431  | 5818.0299   |           |
| 336.5662               | -14226.5512 | -1879.9684 | 0.0000      | 0.0000    |
| 7997.9525              | 6794.5175   | 304.9748   | -1203.4350  | 6858.2403 |
| 308.4052               | -116.1246   | -91.6073   | 680285.8938 | -15.5859  |
| -15.5744               |             |            |             |           |
| [37039]ENERGY: 9500000 | 3301.8234   | 5433.6776  | 5751.6182   |           |
| 321.9571               | -14255.1556 | -1845.6472 | 0.0000      | 0.0000    |
| 8088.1862              | 6796.4595   | 308.4156   | -1291.7266  | 6859.5654 |
| 308.4166               | 59.1551     | -22.1143   | 680285.8938 | -13.8951  |
| -13.9133               |             |            |             |           |
| [37089]ENERGY: 9510000 | 3297.9387   | 5403.8502  | 5720.3746   |           |
| 345.3547               | -14231.7205 | -1899.6717 | 0.0000      | 0.0000    |
| 8158.2971              | 6794.4231   | 311.0890   | -1363.8740  | 6858.0057 |
| 308.4058               | -8.1800     | -1.1771    | 680285.8938 | -15.8380  |
| -15.8331               |             |            |             |           |
| [37125]ENERGY: 9520000 | 3343.7514   | 5501.3971  | 5701.8093   |           |
| 327.0387               | -14384.1913 | -1777.5298 | 0.0000      | 0.0000    |
| 8083.1056              | 6795.3809   | 308.2219   | -1287.7247  | 6859.5211 |
| 308.5660               | 43.5518     | 15.2489    | 680285.8938 | -15.1723  |
| -15.1860               |             |            |             |           |
| [37175]ENERGY: 9530000 | 3450.5599   | 5473.5763  | 5717.0070   |           |
| 341.7327               | -14277.6465 | -1922.2512 | 0.0000      | 0.0000    |
| 8014.5369              | 6797.5151   | 305.6072   | -1217.0219  | 6861.2238 |
| 308.4852               | -139.9662   | -140.6414  | 680285.8938 | -12.3921  |
| -12.3797               |             |            |             |           |
| [37211]ENERGY: 9540000 | 3400.0112   | 5473.7381  | 5730.5901   |           |
| 332.0254               | -14261.2068 | -1930.1157 | 0.0000      | 0.0000    |
| 8053.4344              | 6798.4767   | 307.0904   | -1254.9577  | 6862.4081 |
| 308.4138               | -147.1516   | -234.3431  | 680285.8938 | -11.5807  |
| -11.5722               |             |            |             |           |
| [37261]ENERGY: 9550000 | 3288.5726   | 5456.8928  | 5765.9873   |           |
| 363.6179               | -14360.5832 | -1778.4686 | 0.0000      | 0.0000    |
| 8060.6859              | 6796.7048   | 307.3670   | -1263.9812  | 6862.0371 |
| 308.1667               | 53.7410     | 41.5922    | 680285.8938 | -15.9412  |
| -15.9497               |             |            |             |           |
| [37297]ENERGY: 9560000 | 3318.4926   | 5439.9278  | 5737.5611   |           |



## Supplementary Text 6

|                        |             |            |             |           |
|------------------------|-------------|------------|-------------|-----------|
| 342.2583               | -14331.0039 | -1765.0001 | 0.0000      | 0.0000    |
| 8053.8020              | 6796.0377   | 307.1045   | -1257.7642  | 6862.1803 |
| 308.2727               | 86.4378     | 66.0284    | 680285.8938 | -11.6913  |
| -11.6849               |             |            |             |           |
| [37347]ENERGY: 9570000 | 3338.0504   | 5426.8108  | 5685.6261   |           |
| 304.3908               | -14272.7480 | -1808.6731 | 0.0000      | 0.0000    |
| 8123.6528              | 6797.1098   | 309.7680   | -1326.5430  | 6862.7018 |
| 308.2810               | 66.5400     | -2.4217    | 680285.8938 | -13.3215  |
| -13.3041               |             |            |             |           |
| [37383]ENERGY: 9580000 | 3320.5711   | 5502.6269  | 5699.4257   |           |
| 325.1760               | -14376.5573 | -1776.9654 | 0.0000      | 0.0000    |
| 8103.6884              | 6797.9654   | 309.0067   | -1305.7230  | 6861.9666 |
| 308.1709               | -10.3290    | -51.4570   | 680285.8938 | -13.8902  |
| -13.9068               |             |            |             |           |
| [37433]ENERGY: 9590000 | 3385.5873   | 5510.2259  | 5778.3632   |           |
| 366.6873               | -14368.7281 | -1847.7663 | 0.0000      | 0.0000    |
| 7972.6408              | 6797.0100   | 304.0096   | -1175.6308  | 6861.9955 |
| 308.3220               | -83.5518    | -114.9420  | 680285.8938 | -12.8629  |
| -12.8591               |             |            |             |           |
| [37472]ENERGY: 9600000 | 3353.2396   | 5565.3359  | 5807.6837   |           |
| 357.1848               | -14416.4627 | -1866.9542 | 0.0000      | 0.0000    |
| 7997.4119              | 6797.4389   | 304.9542   | -1199.9730  | 6861.9471 |
| 308.3538               | -52.3734    | -83.1600   | 680285.8938 | -14.0261  |
| -14.0240               |             |            |             |           |
| [37522]ENERGY: 9610000 | 3297.4204   | 5527.3775  | 5757.8450   |           |
| 320.1178               | -14342.9634 | -1810.5881 | 0.0000      | 0.0000    |
| 8051.6067              | 6800.8158   | 307.0207   | -1250.7908  | 6862.6160 |
| 308.2063               | 6.4408      | -105.6927  | 680285.8938 | -11.8476  |
| -11.8657               |             |            |             |           |
| [37558]ENERGY: 9620000 | 3306.3199   | 5433.7075  | 5676.4131   |           |
| 345.0708               | -14259.6560 | -1778.7917 | 0.0000      | 0.0000    |
| 8075.9000              | 6798.9636   | 307.9471   | -1276.9364  | 6862.3403 |
| 308.3163               | 60.2153     | 18.7910    | 680285.8938 | -15.2484  |
| -15.2432               |             |            |             |           |
| [37608]ENERGY: 9630000 | 3318.5313   | 5441.1120  | 5703.5031   |           |
| 343.0404               | -14283.4217 | -1821.7467 | 0.0000      | 0.0000    |
| 8095.3829              | 6796.4013   | 308.6900   | -1298.9816  | 6862.1996 |
| 308.4753               | 90.1660     | 51.0424    | 680285.8938 | -12.9012  |
| -12.8918               |             |            |             |           |
| [37644]ENERGY: 9640000 | 3302.1592   | 5428.8516  | 5730.5233   |           |
| 345.1130               | -14243.1708 | -1821.0352 | 0.0000      | 0.0000    |
| 8052.8019              | 6795.2430   | 307.0663   | -1257.5588  | 6861.2881 |
| 308.5976               | -94.8983    | -83.7014   | 680285.8938 | -14.7827  |
| -14.7602               |             |            |             |           |
| [37694]ENERGY: 9650000 | 3279.0192   | 5540.6662  | 5707.6218   |           |
| 329.0336               | -14281.8585 | -1801.0562 | 0.0000      | 0.0000    |
| 8024.5382              | 6797.9643   | 305.9886   | -1226.5739  | 6862.0810 |
| 308.4405               | 94.8673     | 89.2308    | 680285.8938 | -16.8563  |
| -16.8954               |             |            |             |           |
| [37730]ENERGY: 9660000 | 3278.9233   | 5459.2646  | 5693.0619   |           |
| 335.1074               | -14414.3485 | -1762.3645 | 0.0000      | 0.0000    |
| 8204.3271              | 6793.9714   | 312.8442   | -1410.3557  | 6861.8235 |
| 308.5870               | 11.5602     | -14.4099   | 680285.8938 | -11.4503  |
| -11.4298               |             |            |             |           |

Supplementary Text 6

|                        |             |            |             |           |
|------------------------|-------------|------------|-------------|-----------|
| [37780]ENERGY: 9670000 | 3328.2707   | 5436.6794  | 5736.6798   |           |
| 343.7993               | -14293.1101 | -1852.8119 | 0.0000      | 0.0000    |
| 8098.1816              | 6797.6889   | 308.7967   | -1300.4928  | 6863.1469 |
| 308.4162               | 28.4794     | 6.6389     | 680285.8938 | -12.6228  |
| -12.6350               |             |            |             |           |
| [37816]ENERGY: 9680000 | 3326.9904   | 5408.5906  | 5713.5176   |           |
| 339.6730               | -14345.0909 | -1785.9715 | 0.0000      | 0.0000    |
| 8142.3757              | 6800.0850   | 310.4819   | -1342.2907  | 6863.8148 |
| 308.5827               | -144.6142   | -168.8772  | 680285.8938 | -15.1926  |
| -15.1762               |             |            |             |           |
| [37866]ENERGY: 9690000 | 3311.2599   | 5449.5328  | 5709.8525   |           |
| 326.7525               | -14384.9767 | -1767.7079 | 0.0000      | 0.0000    |
| 8149.7338              | 6794.4469   | 310.7625   | -1355.2869  | 6862.6245 |
| 308.4825               | 27.8076     | 30.2978    | 680285.8938 | -15.8926  |
| -15.9000               |             |            |             |           |
| [37905]ENERGY: 9700000 | 3276.8324   | 5527.8256  | 5742.6615   |           |
| 351.0411               | -14266.0531 | -1897.5113 | 0.0000      | 0.0000    |
| 8065.5058              | 6800.3021   | 307.5507   | -1265.2037  | 6864.4503 |
| 308.4561               | -39.4979    | -77.4749   | 680285.8938 | -13.3094  |
| -13.3098               |             |            |             |           |
| [37955]ENERGY: 9710000 | 3322.9988   | 5522.0052  | 5692.1146   |           |
| 356.5762               | -14303.7501 | -1870.4395 | 0.0000      | 0.0000    |
| 8078.0730              | 6797.5781   | 308.0299   | -1280.4949  | 6864.0328 |
| 308.3022               | -33.6506    | -117.3635  | 680285.8938 | -12.3660  |
| -12.3637               |             |            |             |           |
| [37991]ENERGY: 9720000 | 3384.9030   | 5457.5163  | 5729.4892   |           |
| 362.6840               | -14297.1470 | -1843.8952 | 0.0000      | 0.0000    |
| 8008.3851              | 6801.9355   | 305.3726   | -1206.4497  | 6863.8421 |
| 308.5553               | 17.4012     | -3.6270    | 680285.8938 | -12.1768  |
| -12.1894               |             |            |             |           |
| [38041]ENERGY: 9730000 | 3289.7036   | 5450.8256  | 5685.2614   |           |
| 349.1122               | -14302.9805 | -1779.2234 | 0.0000      | 0.0000    |
| 8105.4123              | 6798.1111   | 309.0724   | -1307.3012  | 6863.1206 |
| 308.5421               | -32.6301    | -33.9135   | 680285.8938 | -13.9874  |
| -13.9855               |             |            |             |           |
| [38077]ENERGY: 9740000 | 3315.7820   | 5539.5482  | 5690.0995   |           |
| 357.5171               | -14400.7918 | -1781.0646 | 0.0000      | 0.0000    |
| 8078.4743              | 6799.5647   | 308.0453   | -1278.9096  | 6865.7871 |
| 308.4905               | 2.7561      | -57.4236   | 680285.8938 | -19.3549  |
| -19.3518               |             |            |             |           |
| [38127]ENERGY: 9750000 | 3300.1555   | 5440.3330  | 5756.9217   |           |
| 348.7431               | -14364.2003 | -1755.4337 | 0.0000      | 0.0000    |
| 8074.0603              | 6800.5795   | 307.8769   | -1273.4807  | 6865.5755 |
| 308.6114               | 80.3770     | 48.2783    | 680285.8938 | -10.4256  |
| -10.4346               |             |            |             |           |
| [38163]ENERGY: 9760000 | 3311.0114   | 5566.9600  | 5746.7835   |           |
| 325.9262               | -14409.7836 | -1722.0160 | 0.0000      | 0.0000    |
| 7984.1073              | 6802.9888   | 304.4469   | -1181.1185  | 6865.0551 |
| 308.6553               | 28.9490     | 67.5209    | 680285.8938 | -13.3293  |
| -13.3044               |             |            |             |           |
| [38213]ENERGY: 9770000 | 3325.5009   | 5467.4081  | 5749.4053   |           |
| 354.8283               | -14369.1941 | -1779.5095 | 0.0000      | 0.0000    |
| 8050.8936              | 6799.3326   | 306.9936   | -1251.5610  | 6864.3256 |
| 308.5264               | -7.2504     | -19.2027   | 680285.8938 | -16.9662  |

Supplementary Text 6

-16.9988  
 [38249]ENERGY: 9780000      3300.2168      5473.9785      5750.9505  
 341.6332      -14319.1485      -1790.1437      0.0000      0.0000  
 8041.7250      6799.2118      306.6439      -1242.5132      6864.7634  
 308.3866      65.3055      -37.6118      680285.8938      -16.3863  
 -16.3864  
 [38299]ENERGY: 9790000      3341.9058      5467.3108      5717.4442  
 315.0340      -14293.2194      -1749.3521      0.0000      0.0000  
 8002.3779      6801.5013      305.1436      -1200.8766      6864.2458  
 308.3494      -4.8869      -7.3263      680285.8938      -15.7517  
 -15.7425  
 [38338]ENERGY: 9800000      3223.1031      5504.0057      5757.4958  
 340.8532      -14362.9914      -1795.7812      0.0000      0.0000  
 8131.7160      6798.4012      310.0754      -1333.3148      6865.3087  
 308.2843      24.1502      21.9741      680285.8938      -17.2993  
 -17.2884  
 [38388]ENERGY: 9810000      3340.2879      5484.5948      5718.6066  
 378.3383      -14376.8663      -1766.0191      0.0000      0.0000  
 8022.4751      6801.4174      305.9099      -1221.0577      6864.2395  
 308.3789      -62.9728      17.3093      680285.8938      -14.0343  
 -14.0303  
 [38424]ENERGY: 9820000      3293.6865      5474.5176      5754.8956  
 360.9223      -14359.7271      -1861.4019      0.0000      0.0000  
 8134.7619      6797.6549      310.1916      -1337.1071      6866.4156  
 308.4837      20.0057      -48.0335      680285.8938      -12.7413  
 -12.7517  
 [38474]ENERGY: 9830000      3365.2819      5401.1495      5731.2454  
 322.4388      -14306.6490      -1830.1728      0.0000      0.0000  
 8117.8523      6801.1462      309.5468      -1316.7062      6864.5418  
 308.6337      -21.9394      -46.6519      680285.8938      -11.9993  
 -11.9779  
 [38510]ENERGY: 9840000      3318.2868      5393.6281      5796.4934  
 345.9298      -14280.8399      -1805.2787      0.0000      0.0000  
 8031.5481      6799.7676      306.2559      -1231.7806      6865.2784  
 308.3495      58.9826      32.4561      680285.8938      -9.4740  
 -9.4765  
 [38560]ENERGY: 9850000      3351.2193      5406.3351      5747.2068  
 361.2644      -14314.0037      -1748.9400      0.0000      0.0000  
 7997.3949      6800.4769      304.9536      -1196.9180      6865.7155  
 308.4521      -111.1149      -51.2141      680285.8938      -16.2520  
 -16.2528  
 [38596]ENERGY: 9860000      3303.4348      5466.9668      5737.4138  
 328.7727      -14396.9006      -1728.5385      0.0000      0.0000  
 8089.9415      6801.0905      308.4825      -1288.8510      6865.6174  
 308.5317      160.8240      162.0398      680285.8938      -11.8595  
 -11.8684  
 [38646]ENERGY: 9870000      3323.3675      5413.1981      5731.7033  
 343.8337      -14236.0457      -1857.5628      0.0000      0.0000  
 8081.1318      6799.6259      308.1466      -1281.5060      6866.1278  
 308.5891      -101.7726      -101.8635      680285.8938      -13.5349  
 -13.5429  
 [38682]ENERGY: 9880000      3429.9239      5432.0785      5739.6868  
 344.1802      -14401.7027      -1780.7522      0.0000      0.0000  
 8037.3458      6800.7603      306.4770      -1236.5855      6866.3022

Supplementary Text 6

|                        |             |            |             |           |
|------------------------|-------------|------------|-------------|-----------|
| 308.5551               | -105.4965   | -135.4083  | 680285.8938 | -13.6322  |
| -13.6227               |             |            |             |           |
| [38732]ENERGY: 9890000 | 3402.3077   | 5446.4024  | 5727.0035   |           |
| 347.4098               | -14413.2160 | -1757.4744 | 0.0000      | 0.0000    |
| 8048.6973              | 6801.1303   | 306.9098   | -1247.5670  | 6864.9162 |
| 308.7688               | -105.4983   | -32.1514   | 680285.8938 | -15.6251  |
| -15.6247               |             |            |             |           |
| [38771]ENERGY: 9900000 | 3150.1823   | 5502.9721  | 5766.0834   |           |
| 328.8663               | -14231.7846 | -1841.3220 | 0.0000      | 0.0000    |
| 8123.3816              | 6798.3792   | 309.7576   | -1325.0024  | 6866.1794 |
| 308.6942               | 52.5420     | 13.1666    | 680285.8938 | -9.8900   |
| -9.8929                |             |            |             |           |
| [38821]ENERGY: 9910000 | 3310.2704   | 5467.3263  | 5707.7195   |           |
| 348.0657               | -14368.9521 | -1780.7348 | 0.0000      | 0.0000    |
| 8118.1713              | 6801.8663   | 309.5590   | -1316.3050  | 6867.9559 |
| 308.7196               | -89.6619    | -111.1533  | 680285.8938 | -12.2593  |
| -12.2646               |             |            |             |           |
| [38857]ENERGY: 9920000 | 3340.6351   | 5471.6848  | 5712.5705   |           |
| 329.0140               | -14314.1819 | -1863.9118 | 0.0000      | 0.0000    |
| 8124.8381              | 6800.6489   | 309.8132   | -1324.1892  | 6868.6224 |
| 308.4945               | -146.5383   | -97.3907   | 680285.8938 | -14.8699  |
| -14.8654               |             |            |             |           |
| [38907]ENERGY: 9930000 | 3340.1544   | 5507.7426  | 5720.1466   |           |
| 342.3173               | -14257.3180 | -1884.0680 | 0.0000      | 0.0000    |
| 8037.3559              | 6806.3307   | 306.4773   | -1231.0252  | 6869.1258 |
| 308.7849               | -74.7021    | -32.9900   | 680285.8938 | -11.4410  |
| -11.4466               |             |            |             |           |
| [38943]ENERGY: 9940000 | 3376.6802   | 5461.8969  | 5689.5827   |           |
| 342.5006               | -14342.6086 | -1794.2201 | 0.0000      | 0.0000    |
| 8070.7699              | 6804.6017   | 307.7515   | -1266.1683  | 6869.9038 |
| 308.6141               | -5.6179     | 33.0316    | 680285.8938 | -14.1894  |
| -14.2031               |             |            |             |           |
| [38993]ENERGY: 9950000 | 3298.4076   | 5465.3237  | 5697.5949   |           |
| 378.0301               | -14382.7863 | -1689.3181 | 0.0000      | 0.0000    |
| 8034.4888              | 6801.7406   | 306.3680   | -1232.7482  | 6867.4955 |
| 308.8025               | 122.8048    | 158.8356   | 680285.8938 | -12.1151  |
| -12.1083               |             |            |             |           |
| [39029]ENERGY: 9960000 | 3368.3519   | 5420.5969  | 5697.5340   |           |
| 328.8480               | -14259.7543 | -1789.9124 | 0.0000      | 0.0000    |
| 8037.5959              | 6803.2600   | 306.4865   | -1234.3358  | 6868.1536 |
| 308.7114               | 82.6521     | 7.8605     | 680285.8938 | -15.0437  |
| -15.0300               |             |            |             |           |
| [39079]ENERGY: 9970000 | 3270.4374   | 5425.6341  | 5713.9680   |           |
| 337.6001               | -14312.3302 | -1714.1792 | 0.0000      | 0.0000    |
| 8084.6599              | 6805.7901   | 308.2811   | -1278.8698  | 6868.0747 |
| 308.4952               | 201.2725    | 170.1501   | 680285.8938 | -11.3694  |
| -11.3798               |             |            |             |           |
| [39115]ENERGY: 9980000 | 3368.0916   | 5419.3865  | 5713.1120   |           |
| 323.3945               | -14333.7016 | -1770.7190 | 0.0000      | 0.0000    |
| 8084.8265              | 6804.3906   | 308.2875   | -1280.4360  | 6868.3259 |
| 308.3718               | 104.1722    | -3.6155    | 680285.8938 | -11.6848  |
| -11.6986               |             |            |             |           |
| [39165]ENERGY: 9990000 | 3306.2693   | 5495.0828  | 5693.2613   |           |
| 316.5293               | -14264.4038 | -1849.3964 | 0.0000      | 0.0000    |

Supplementary Text 6

|                         |             |            |             |           |
|-------------------------|-------------|------------|-------------|-----------|
| 8105.6350               | 6802.9774   | 309.0809   | -1302.6576  | 6868.5061 |
| 308.3943                | 113.4287    | 46.0478    | 680285.8938 | -14.6481  |
| -14.6404                |             |            |             |           |
| [39204]ENERGY: 10000000 | 3371.6592   | 5439.8667  | 5672.2979   |           |
| 359.8772                | -14296.1487 | -1794.6216 | 0.0000      | 0.0000    |
| 8049.0025               | 6801.9331   | 306.9214   | -1247.0694  | 6868.5464 |
| 308.5440                | 18.7403     | 13.0819    | 680285.8938 | -13.5504  |
| -13.5435                |             |            |             |           |
| [39254]ENERGY: 10010000 | 3316.4079   | 5337.4063  | 5665.4768   |           |
| 317.3690                | -14187.7469 | -1780.0205 | 0.0000      | 0.0000    |
| 8133.3103               | 6802.2030   | 310.1362   | -1331.1073  | 6868.8953 |
| 308.5224                | 105.3684    | 33.7249    | 680285.8938 | -8.9128   |
| -8.9028                 |             |            |             |           |
| [39290]ENERGY: 10020000 | 3281.0820   | 5407.4619  | 5699.7502   |           |
| 318.3877                | -14277.0929 | -1749.0829 | 0.0000      | 0.0000    |
| 8122.0711               | 6802.5770   | 309.7077   | -1319.4941  | 6868.5926 |
| 308.2977                | 1.6533      | 2.6745     | 680285.8938 | -11.6898  |
| -11.6894                |             |            |             |           |
| [39340]ENERGY: 10030000 | 3431.5729   | 5497.0834  | 5680.7241   |           |
| 337.7855                | -14312.8946 | -1818.2349 | 0.0000      | 0.0000    |
| 7993.3965               | 6809.4330   | 304.8011   | -1183.9635  | 6869.2510 |
| 308.3598                | -52.0155    | -57.5377   | 680285.8938 | -13.2754  |
| -13.2769                |             |            |             |           |
| [39376]ENERGY: 10040000 | 3419.8946   | 5520.7793  | 5717.8260   |           |
| 334.8019                | -14389.4276 | -1762.2878 | 0.0000      | 0.0000    |
| 7964.6749               | 6806.2613   | 303.7059   | -1158.4136  | 6869.3294 |
| 308.4269                | 105.8191    | 10.3358    | 680285.8938 | -10.3329  |
| -10.3341                |             |            |             |           |
| [39426]ENERGY: 10050000 | 3289.5607   | 5415.3125  | 5695.9802   |           |
| 346.1690                | -14286.5479 | -1768.1368 | 0.0000      | 0.0000    |
| 8111.3103               | 6803.6479   | 309.2973   | -1307.6623  | 6869.5650 |
| 308.4798                | 118.5437    | 71.5189    | 680285.8938 | -14.5864  |
| -14.5786                |             |            |             |           |
| [39462]ENERGY: 10060000 | 3391.9800   | 5527.3491  | 5644.7148   |           |
| 330.6721                | -14263.8656 | -1906.3369 | 0.0000      | 0.0000    |
| 8078.8086               | 6803.3221   | 308.0580   | -1275.4865  | 6870.1604 |
| 308.3676                | -205.2341   | -108.2323  | 680285.8938 | -12.7220  |
| -12.7301                |             |            |             |           |
| [39512]ENERGY: 10070000 | 3375.6019   | 5441.5543  | 5691.1110   |           |
| 342.1090                | -14298.6693 | -1815.6436 | 0.0000      | 0.0000    |
| 8070.9751               | 6807.0384   | 307.7593   | -1263.9366  | 6871.0633 |
| 308.3079                | -116.9029   | -105.3794  | 680285.8938 | -14.6373  |
| -14.6535                |             |            |             |           |
| [39548]ENERGY: 10080000 | 3254.4615   | 5437.7498  | 5688.1474   |           |
| 359.5229                | -14227.8885 | -1798.0902 | 0.0000      | 0.0000    |
| 8088.4935               | 6802.3964   | 308.4273   | -1286.0970  | 6869.9438 |
| 308.2506                | 93.6827     | 0.8915     | 680285.8938 | -13.2197  |
| -13.2028                |             |            |             |           |
| [39598]ENERGY: 10090000 | 3302.2963   | 5576.6996  | 5727.5192   |           |
| 332.5799                | -14292.9225 | -1840.2251 | 0.0000      | 0.0000    |
| 8002.5421               | 6808.4895   | 305.1498   | -1194.0526  | 6871.4070 |
| 308.5097                | -7.7705     | 37.6720    | 680285.8938 | -15.1495  |
| -15.1600                |             |            |             |           |
| [39637]ENERGY: 10100000 | 3345.9153   | 5457.1267  | 5715.0023   |           |

## Supplementary Text 6

|                         |             |            |             |           |
|-------------------------|-------------|------------|-------------|-----------|
| 350.8648                | -14298.0947 | -1826.3998 | 0.0000      | 0.0000    |
| 8060.8797               | 6805.2944   | 307.3743   | -1255.5853  | 6872.9731 |
| 308.4805                | -116.4856   | -138.0096  | 680285.8938 | -13.8198  |
| -13.8140                |             |            |             |           |
| [39687]ENERGY: 10110000 | 3369.0874   | 5417.7830  | 5649.1022   |           |
| 344.0671                | -14273.1462 | -1744.5309 | 0.0000      | 0.0000    |
| 8044.2306               | 6806.5933   | 306.7395   | -1237.6373  | 6872.3277 |
| 308.3742                | -13.5531    | -4.7700    | 680285.8938 | -14.8683  |
| -14.8611                |             |            |             |           |
| [39723]ENERGY: 10120000 | 3303.1965   | 5493.2888  | 5752.7922   |           |
| 368.2926                | -14249.0825 | -1878.4359 | 0.0000      | 0.0000    |
| 8020.3864               | 6810.4382   | 305.8303   | -1209.9482  | 6871.8381 |
| 308.4978                | -90.9411    | -29.8954   | 680285.8938 | -11.6999  |
| -11.7153                |             |            |             |           |
| [39773]ENERGY: 10130000 | 3355.1873   | 5411.4311  | 5677.6940   |           |
| 354.1883                | -14196.2603 | -1830.5108 | 0.0000      | 0.0000    |
| 8035.6526               | 6807.3821   | 306.4124   | -1228.2705  | 6872.6268 |
| 308.4214                | -9.5030     | -43.4800   | 680285.8938 | -15.9378  |
| -15.9260                |             |            |             |           |
| [39809]ENERGY: 10140000 | 3314.6930   | 5385.9309  | 5704.1193   |           |
| 352.6287                | -14307.4836 | -1786.1552 | 0.0000      | 0.0000    |
| 8143.1594               | 6806.8924   | 310.5118   | -1336.2671  | 6872.5281 |
| 308.5046                | 217.0865    | 103.0741   | 680285.8938 | -12.9847  |
| -12.9944                |             |            |             |           |
| [39859]ENERGY: 10150000 | 3384.1129   | 5441.1482  | 5735.1342   |           |
| 331.1544                | -14291.7192 | -1836.5173 | 0.0000      | 0.0000    |
| 8046.5912               | 6809.9044   | 306.8295   | -1236.6868  | 6872.7040 |
| 308.6245                | -79.9213    | -40.3348   | 680285.8938 | -12.7253  |
| -12.7172                |             |            |             |           |
| [39895]ENERGY: 10160000 | 3389.2402   | 5372.5445  | 5714.8279   |           |
| 342.5183                | -14309.9551 | -1772.5745 | 0.0000      | 0.0000    |
| 8074.3121               | 6810.9136   | 307.8865   | -1263.3986  | 6872.6537 |
| 308.6852                | -91.6693    | -113.1437  | 680285.8938 | -16.0542  |
| -16.0613                |             |            |             |           |
| [39945]ENERGY: 10170000 | 3288.8448   | 5417.9910  | 5745.2072   |           |
| 344.7782                | -14301.4385 | -1768.8894 | 0.0000      | 0.0000    |
| 8079.6719               | 6806.1653   | 308.0909   | -1273.5067  | 6872.2238 |
| 308.5950                | -79.6739    | -63.2322   | 680285.8938 | -14.2421  |
| -14.2243                |             |            |             |           |
| [39981]ENERGY: 10180000 | 3368.1951   | 5525.4784  | 5750.9278   |           |
| 330.8862                | -14356.6125 | -1812.8100 | 0.0000      | 0.0000    |
| 8003.8112               | 6809.8763   | 305.1982   | -1193.9349  | 6874.0992 |
| 308.3782                | -25.9413    | -0.3151    | 680285.8938 | -15.3845  |
| -15.3850                |             |            |             |           |
| [40031]ENERGY: 10190000 | 3314.0664   | 5443.8782  | 5783.1792   |           |
| 336.7961                | -14348.3302 | -1795.5071 | 0.0000      | 0.0000    |
| 8075.6431               | 6809.7256   | 307.9373   | -1265.9175  | 6872.6618 |
| 308.3669                | 24.7265     | 13.4740    | 680285.8938 | -15.5928  |
| -15.5979                |             |            |             |           |
| [40070]ENERGY: 10200000 | 3375.5860   | 5374.2239  | 5753.5527   |           |
| 361.2829                | -14363.8629 | -1806.9185 | 0.0000      | 0.0000    |
| 8115.2815               | 6809.1457   | 309.4488   | -1306.1358  | 6873.3470 |
| 308.5909                | -49.5955    | -77.0149   | 680285.8938 | -10.6795  |
| -10.6816                |             |            |             |           |

## Supplementary Text 6

|                         |             |            |             |
|-------------------------|-------------|------------|-------------|
| [40120]ENERGY: 10210000 | 3327.4167   | 5494.6947  | 5731.4989   |
| 359.2151                | -14395.5474 | -1794.8375 | 0.0000      |
| 8084.1773               | 6806.6179   | 308.2627   | -1277.5594  |
| 308.6779                | 123.4524    | 1.6099     | 680285.8938 |
| -9.5166                 |             |            | -9.4965     |
| [40156]ENERGY: 10220000 | 3244.1555   | 5445.0141  | 5744.1295   |
| 351.3253                | -14352.0245 | -1791.7201 | 0.0000      |
| 8164.8314               | 6805.7112   | 311.3382   | -1359.1202  |
| 308.6385                | 1.1329      | 22.0338    | 680285.8938 |
| -13.5099                |             |            | -13.5179    |
| [40206]ENERGY: 10230000 | 3294.3243   | 5538.6452  | 5690.9198   |
| 344.6708                | -14321.2863 | -1852.6481 | 0.0000      |
| 8112.8583               | 6807.4840   | 309.3564   | -1305.3743  |
| 308.7086                | 120.3737    | 110.4737   | 680285.8938 |
| -11.6629                |             |            | -11.6687    |
| [40242]ENERGY: 10240000 | 3352.9090   | 5405.5127  | 5734.1934   |
| 342.9218                | -14283.8152 | -1846.8590 | 0.0000      |
| 8104.4283               | 6809.2909   | 309.0349   | -1295.1374  |
| 308.7735                | -73.9996    | -68.0256   | 680285.8938 |
| -9.2796                 |             |            | -9.2784     |
| [40292]ENERGY: 10250000 | 3221.0226   | 5450.3803  | 5773.9835   |
| 317.4961                | -14299.2129 | -1821.3512 | 0.0000      |
| 8164.8331               | 6807.1516   | 311.3383   | -1357.6815  |
| 308.6972                | 28.7081     | -5.6059    | 680285.8938 |
| -11.0839                |             |            | -11.0912    |
| [40328]ENERGY: 10260000 | 3321.6017   | 5402.8704  | 5770.5773   |
| 328.9400                | -14291.0220 | -1843.6995 | 0.0000      |
| 8117.9473               | 6807.2154   | 309.5504   | -1310.7319  |
| 308.5199                | -95.1878    | -78.3910   | 680285.8938 |
| -5.2628                 |             |            | -5.2565     |
| [40378]ENERGY: 10270000 | 3402.3293   | 5395.8277  | 5736.6333   |
| 333.2192                | -14360.3009 | -1860.0124 | 0.0000      |
| 8159.4119               | 6807.1081   | 311.1315   | -1352.3038  |
| 308.6509                | 14.1548     | -13.7978   | 680285.8938 |
| -9.3461                 |             |            | -9.3565     |
| [40414]ENERGY: 10280000 | 3337.4869   | 5515.3834  | 5705.4838   |
| 319.3194                | -14328.4631 | -1805.4705 | 0.0000      |
| 8064.5528               | 6808.2926   | 307.5144   | -1256.2602  |
| 308.6980                | -101.6666   | -80.1110   | 680285.8938 |
| -13.6454                |             |            | -13.6255    |
| [40464]ENERGY: 10290000 | 3331.2596   | 5495.8729  | 5747.1376   |
| 346.3026                | -14407.5216 | -1744.3620 | 0.0000      |
| 8041.3748               | 6810.0638   | 306.6306   | -1231.3110  |
| 308.9381                | 102.4224    | 88.4447    | 680285.8938 |
| -10.6793                |             |            | -10.6882    |
| [40503]ENERGY: 10300000 | 3348.5971   | 5470.3950  | 5757.4330   |
| 331.3743                | -14275.6768 | -1851.5182 | 0.0000      |
| 8029.1668               | 6809.7713   | 306.1651   | -1219.3955  |
| 308.8292                | -10.7183    | -85.4411   | 680285.8938 |
| -12.7624                |             |            | -12.7632    |
| [40553]ENERGY: 10310000 | 3365.7650   | 5386.5130  | 5695.6276   |
| 368.2860                | -14301.4468 | -1769.4366 | 0.0000      |
| 8065.7616               | 6811.0698   | 307.5605   | -1254.6918  |
| 308.6835                | 127.2941    | 41.5101    | 680285.8938 |
|                         |             |            | -15.9324    |

Supplementary Text 6

-15.9257  
 [40589]ENERGY: 10320000      3304.8832      5426.0972      5756.3580  
 335.6095      -14312.9565      -1804.6954      0.0000      0.0000  
 8103.8162      6809.1122      309.0116      -1294.7040      6873.5195  
 308.5575      171.7943      113.2790      680285.8938      -11.2813  
 -11.2832  
 [40639]ENERGY: 10330000      3356.6484      5380.7453      5755.4249  
 323.5051      -14315.7010      -1774.1002      0.0000      0.0000  
 8082.1777      6808.7002      308.1865      -1273.4775      6874.6636  
 308.6066      148.3407      34.6537      680285.8938      -10.8582  
 -10.8766  
 [40675]ENERGY: 10340000      3258.8216      5410.9567      5799.2692  
 325.3137      -14262.3707      -1860.8286      0.0000      0.0000  
 8138.4279      6809.5899      310.3314      -1328.8380      6875.2259  
 308.7050      10.7415      -92.3650      680285.8938      -12.4707  
 -12.4598  
 [40725]ENERGY: 10350000      3325.2269      5464.5527      5775.9325  
 345.3314      -14406.5847      -1769.4139      0.0000      0.0000  
 8070.4390      6805.4840      307.7389      -1264.9550      6873.7767  
 308.7517      -39.9760      -58.2610      680285.8938      -12.8168  
 -12.8166  
 [40761]ENERGY: 10360000      3311.5115      5509.5703      5757.7137  
 342.5771      -14353.6682      -1837.8005      0.0000      0.0000  
 8080.8088      6810.7127      308.1343      -1270.0962      6874.3265  
 308.7605      58.8710      13.7527      680285.8938      -11.6713  
 -11.6732  
 [40811]ENERGY: 10370000      3308.0772      5440.7478      5778.0765  
 337.5001      -14293.4177      -1876.7303      0.0000      0.0000  
 8117.6278      6811.8814      309.5382      -1305.7464      6874.3711  
 308.5879      -74.8114      -44.3108      680285.8938      -15.2553  
 -15.2537  
 [40847]ENERGY: 10380000      3293.9297      5423.3512      5765.5949  
 354.5017      -14308.7740      -1802.5801      0.0000      0.0000  
 8083.0183      6809.0417      308.2185      -1273.9766      6873.3071  
 308.6845      -8.6104      -17.7419      680285.8938      -12.8772  
 -12.8655  
 [40897]ENERGY: 10390000      3312.1094      5389.0128      5713.7393  
 322.6062      -14319.2401      -1794.2250      0.0000      0.0000  
 8181.5676      6805.5703      311.9764      -1375.9973      6874.5462  
 308.5888      -64.0304      -26.0714      680285.8938      -16.9566  
 -16.9511  
 [40936]ENERGY: 10400000      3311.5161      5443.5601      5724.2081  
 314.9542      -14321.1627      -1748.6248      0.0000      0.0000  
 8087.3227      6811.7737      308.3827      -1275.5489      6873.4624  
 308.8115      17.2645      50.7718      680285.8938      -11.4488  
 -11.4776  
 [40986]ENERGY: 10410000      3267.7313      5558.9364      5710.0571  
 328.6154      -14340.7954      -1804.8812      0.0000      0.0000  
 8085.7819      6805.4455      308.3239      -1280.3363      6874.4323  
 308.7053      -84.0171      -32.8472      680285.8938      -17.0901  
 -17.0762  
 [41022]ENERGY: 10420000      3264.9287      5461.5286      5678.0086  
 359.9040      -14255.0682      -1828.9800      0.0000      0.0000  
 8129.6125      6809.9343      309.9952      -1319.6782      6876.1609



## Supplementary Text 6

|                         |             |            |             |           |
|-------------------------|-------------|------------|-------------|-----------|
| 308.6816                | -41.4377    | -41.5723   | 680285.8938 | -13.4345  |
| -13.4404                |             |            |             |           |
| [41072]ENERGY: 10430000 | 3337.1171   | 5408.7819  | 5723.5844   |           |
| 334.8586                | -14293.7827 | -1835.2922 | 0.0000      | 0.0000    |
| 8133.3984               | 6808.6654   | 310.1396   | -1324.7330  | 6876.2473 |
| 308.7441                | -18.1774    | -72.3847   | 680285.8938 | -13.1112  |
| -13.1105                |             |            |             |           |
| [41108]ENERGY: 10440000 | 3293.8327   | 5504.6311  | 5730.8418   |           |
| 330.7826                | -14305.9866 | -1798.4551 | 0.0000      | 0.0000    |
| 8056.6155               | 6812.2620   | 307.2117   | -1244.3535  | 6876.8969 |
| 308.8691                | -1.4136     | -43.8053   | 680285.8938 | -11.4957  |
| -11.5016                |             |            |             |           |
| [41158]ENERGY: 10450000 | 3317.0918   | 5512.7915  | 5706.5891   |           |
| 332.4532                | -14380.6820 | -1830.2250 | 0.0000      | 0.0000    |
| 8151.0892               | 6809.1079   | 310.8142   | -1341.9813  | 6876.1972 |
| 308.7256                | 18.3053     | -8.3193    | 680285.8938 | -14.3430  |
| -14.3282                |             |            |             |           |
| [41194]ENERGY: 10460000 | 3343.2479   | 5464.8790  | 5695.1076   |           |
| 325.5884                | -14312.9583 | -1761.8239 | 0.0000      | 0.0000    |
| 8057.1914               | 6811.2322   | 307.2337   | -1245.9592  | 6876.2843 |
| 308.7297                | 154.8103    | 17.4032    | 680285.8938 | -11.6891  |
| -11.6979                |             |            |             |           |
| [41244]ENERGY: 10470000 | 3396.9201   | 5404.4493  | 5724.8389   |           |
| 338.8982                | -14372.2659 | -1769.0879 | 0.0000      | 0.0000    |
| 8089.3204               | 6813.0730   | 308.4588   | -1276.2473  | 6877.1424 |
| 308.7192                | -40.0118    | -52.9259   | 680285.8938 | -12.6149  |
| -12.6124                |             |            |             |           |
| [41280]ENERGY: 10480000 | 3288.9967   | 5472.5812  | 5733.3599   |           |
| 361.8425                | -14334.9027 | -1783.2392 | 0.0000      | 0.0000    |
| 8074.2984               | 6812.9368   | 307.8860   | -1261.3616  | 6877.5887 |
| 308.8339                | 58.3381     | 106.5279   | 680285.8938 | -13.0169  |
| -12.9972                |             |            |             |           |
| [41330]ENERGY: 10490000 | 3293.9321   | 5419.3336  | 5722.4320   |           |
| 343.2685                | -14286.4525 | -1815.4254 | 0.0000      | 0.0000    |
| 8134.6213               | 6811.7097   | 310.1862   | -1322.9116  | 6878.4099 |
| 308.8320                | 48.6472     | -18.4329   | 680285.8938 | -11.7805  |
| -11.7923                |             |            |             |           |
| [41369]ENERGY: 10500000 | 3372.4426   | 5471.7899  | 5688.8358   |           |
| 341.3369                | -14337.7395 | -1794.5584 | 0.0000      | 0.0000    |
| 8071.9737               | 6814.0810   | 307.7974   | -1257.8928  | 6878.2406 |
| 308.6515                | 33.1584     | -43.2977   | 680285.8938 | -16.3030  |
| -16.3040                |             |            |             |           |
| [41419]ENERGY: 10510000 | 3314.7141   | 5530.5216  | 5776.7798   |           |
| 343.2896                | -14370.5534 | -1852.4283 | 0.0000      | 0.0000    |
| 8069.3961               | 6811.7193   | 307.6991   | -1257.6768  | 6878.9469 |
| 308.8351                | -140.1342   | -194.0855  | 680285.8938 | -16.1774  |
| -16.1748                |             |            |             |           |
| [41455]ENERGY: 10520000 | 3378.6492   | 5380.8891  | 5704.7430   |           |
| 343.0373                | -14323.3403 | -1814.3614 | 0.0000      | 0.0000    |
| 8140.1934               | 6809.8103   | 310.3987   | -1330.3831  | 6876.5215 |
| 308.8385                | -89.1465    | -73.0222   | 680285.8938 | -16.2564  |
| -16.2590                |             |            |             |           |
| [41505]ENERGY: 10530000 | 3320.8733   | 5391.1260  | 5697.0540   |           |
| 347.9723                | -14339.8480 | -1776.4080 | 0.0000      | 0.0000    |

## Supplementary Text 6

|                         |             |            |             |           |
|-------------------------|-------------|------------|-------------|-----------|
| 8167.4892               | 6808.2589   | 311.4395   | -1359.2304  | 6878.0749 |
| 308.8208                | -57.8266    | -125.7428  | 680285.8938 | -12.3868  |
| -12.3901                |             |            |             |           |
| [41541]ENERGY: 10540000 | 3374.7484   | 5465.6631  | 5701.0005   |           |
| 349.7573                | -14335.0493 | -1814.6037 | 0.0000      | 0.0000    |
| 8069.8738               | 6811.3900   | 307.7173   | -1258.4837  | 6878.6885 |
| 308.7137                | 90.5227     | 40.4200    | 680285.8938 | -12.1258  |
| -12.1236                |             |            |             |           |
| [41591]ENERGY: 10550000 | 3244.7889   | 5530.7712  | 5694.4203   |           |
| 310.8649                | -14315.3730 | -1782.4844 | 0.0000      | 0.0000    |
| 8128.7346               | 6811.7226   | 309.9618   | -1317.0120  | 6879.3519 |
| 308.8160                | 132.6875    | 103.1718   | 680285.8938 | -12.9539  |
| -12.9538                |             |            |             |           |
| [41627]ENERGY: 10560000 | 3316.8537   | 5458.1779  | 5761.3826   |           |
| 356.5622                | -14334.4245 | -1824.4152 | 0.0000      | 0.0000    |
| 8078.7152               | 6812.8519   | 308.0544   | -1265.8633  | 6878.4151 |
| 308.8318                | -87.9289    | -14.8680   | 680285.8938 | -13.0526  |
| -13.0613                |             |            |             |           |
| [41677]ENERGY: 10570000 | 3361.3141   | 5424.1160  | 5715.9126   |           |
| 376.3811                | -14297.8263 | -1820.2103 | 0.0000      | 0.0000    |
| 8056.1097               | 6815.7969   | 307.1925   | -1240.3128  | 6879.8177 |
| 308.6694                | 34.0468     | 13.1009    | 680285.8938 | -14.1632  |
| -14.1492                |             |            |             |           |
| [41713]ENERGY: 10580000 | 3299.7174   | 5430.1437  | 5726.4653   |           |
| 312.1373                | -14278.4256 | -1769.4088 | 0.0000      | 0.0000    |
| 8094.0225               | 6814.6520   | 308.6381   | -1279.3706  | 6880.4206 |
| 308.6784                | -32.4319    | -21.7650   | 680285.8938 | -14.5655  |
| -14.5614                |             |            |             |           |
| [41763]ENERGY: 10590000 | 3332.7449   | 5522.3971  | 5735.3398   |           |
| 340.9414                | -14298.1060 | -1854.7318 | 0.0000      | 0.0000    |
| 8038.6556               | 6817.2412   | 306.5269   | -1221.4144  | 6881.4802 |
| 308.7535                | 20.5130     | 45.1508    | 680285.8938 | -14.0117  |
| -14.0040                |             |            |             |           |
| [41802]ENERGY: 10600000 | 3308.1271   | 5342.3886  | 5724.4618   |           |
| 341.3873                | -14293.9765 | -1685.6099 | 0.0000      | 0.0000    |
| 8084.0864               | 6820.8648   | 308.2593   | -1263.2216  | 6880.8600 |
| 308.7292                | 73.7746     | 84.9664    | 680285.8938 | -15.7041  |
| -15.7315                |             |            |             |           |
| [41852]ENERGY: 10610000 | 3377.4872   | 5412.2274  | 5722.1604   |           |
| 341.4816                | -14366.0203 | -1744.9511 | 0.0000      | 0.0000    |
| 8072.5982               | 6814.9834   | 307.8212   | -1257.6148  | 6880.6343 |
| 308.5193                | -7.6933     | 99.2621    | 680285.8938 | -12.6975  |
| -12.6818                |             |            |             |           |
| [41888]ENERGY: 10620000 | 3348.4207   | 5391.6635  | 5751.2940   |           |
| 344.6399                | -14367.0182 | -1724.8598 | 0.0000      | 0.0000    |
| 8068.0631               | 6812.2032   | 307.6483   | -1255.8599  | 6880.4574 |
| 308.6282                | -55.1104    | -63.2305   | 680285.8938 | -9.5805   |
| -9.5794                 |             |            |             |           |
| [41938]ENERGY: 10630000 | 3271.9498   | 5346.0474  | 5694.8576   |           |
| 344.6064                | -14244.9198 | -1742.7272 | 0.0000      | 0.0000    |
| 8145.3192               | 6815.1334   | 310.5942   | -1330.1858  | 6880.7793 |
| 308.6220                | 51.9611     | 9.1311     | 680285.8938 | -9.8934   |
| -9.9053                 |             |            |             |           |
| [41974]ENERGY: 10640000 | 3251.7926   | 5406.5608  | 5711.7739   |           |

## Supplementary Text 6

|                         |             |            |             |           |
|-------------------------|-------------|------------|-------------|-----------|
| 332.3586                | -14179.8642 | -1795.8591 | 0.0000      | 0.0000    |
| 8088.6992               | 6815.4618   | 308.4351   | -1273.2374  | 6881.4963 |
| 308.4804                | -42.7926    | -21.8835   | 680285.8938 | -11.3897  |
| -11.3916                |             |            |             |           |
| [42024]ENERGY: 10650000 | 3187.1467   | 5360.8218  | 5756.2110   |           |
| 350.3083                | -14238.2380 | -1795.4150 | 0.0000      | 0.0000    |
| 8196.1407               | 6816.9756   | 312.5321   | -1379.1651  | 6881.0155 |
| 308.5252                | 53.1048     | 43.5228    | 680285.8938 | -9.6827   |
| -9.6753                 |             |            |             |           |
| [42060]ENERGY: 10660000 | 3376.9204   | 5458.4465  | 5724.4563   |           |
| 328.9953                | -14342.5615 | -1791.5859 | 0.0000      | 0.0000    |
| 8063.1449               | 6817.8160   | 307.4607   | -1245.3289  | 6881.7377 |
| 308.7314                | 13.6694     | 36.2576    | 680285.8938 | -9.3829   |
| -9.3790                 |             |            |             |           |
| [42110]ENERGY: 10670000 | 3346.9934   | 5389.9527  | 5671.0807   |           |
| 332.6317                | -14199.1520 | -1825.1486 | 0.0000      | 0.0000    |
| 8101.1663               | 6817.5242   | 308.9105   | -1283.6421  | 6881.7194 |
| 308.7021                | 52.5950     | -37.8609   | 680285.8938 | -10.2179  |
| -10.2138                |             |            |             |           |
| [42146]ENERGY: 10680000 | 3380.9795   | 5330.8423  | 5758.1322   |           |
| 311.6288                | -14170.6114 | -1877.6774 | 0.0000      | 0.0000    |
| 8083.2762               | 6816.5701   | 308.2284   | -1266.7061  | 6883.2039 |
| 308.7954                | -81.2759    | -128.6364  | 680285.8938 | -11.5868  |
| -11.5859                |             |            |             |           |
| [42196]ENERGY: 10690000 | 3301.1788   | 5314.7782  | 5744.3664   |           |
| 350.5147                | -14257.8463 | -1828.8652 | 0.0000      | 0.0000    |
| 8192.6056               | 6816.7321   | 312.3973   | -1375.8735  | 6884.0394 |
| 308.8714                | 9.8196      | -0.1095    | 680285.8938 | -10.1057  |
| -10.1042                |             |            |             |           |
| [42235]ENERGY: 10700000 | 3325.6894   | 5380.5795  | 5760.6722   |           |
| 334.7319                | -14294.7304 | -1790.3254 | 0.0000      | 0.0000    |
| 8102.5528               | 6819.1700   | 308.9634   | -1283.3827  | 6882.5738 |
| 308.9795                | 45.6137     | 45.5750    | 680285.8938 | -11.6596  |
| -11.6661                |             |            |             |           |
| [42285]ENERGY: 10710000 | 3330.0936   | 5447.6233  | 5787.5619   |           |
| 367.8801                | -14354.6915 | -1857.3466 | 0.0000      | 0.0000    |
| 8094.8865               | 6816.0073   | 308.6711   | -1278.8791  | 6883.7824 |
| 308.9232                | -149.2367   | -131.1838  | 680285.8938 | -12.2893  |
| -12.3002                |             |            |             |           |
| [42321]ENERGY: 10720000 | 3228.0926   | 5451.0008  | 5736.9245   |           |
| 345.7889                | -14263.3559 | -1857.1046 | 0.0000      | 0.0000    |
| 8172.8450               | 6814.1912   | 311.6438   | -1358.6538  | 6883.6228 |
| 308.9142                | -18.8187    | 11.2268    | 680285.8938 | -8.5889   |
| -8.5751                 |             |            |             |           |
| [42371]ENERGY: 10730000 | 3416.0325   | 5367.6904  | 5775.7612   |           |
| 339.3018                | -14327.5339 | -1779.4617 | 0.0000      | 0.0000    |
| 8032.6515               | 6824.4419   | 306.2980   | -1208.2096  | 6884.2664 |
| 308.8555                | 11.6773     | -53.1491   | 680285.8938 | -10.9070  |
| -10.9041                |             |            |             |           |
| [42407]ENERGY: 10740000 | 3483.6586   | 5452.2467  | 5710.4849   |           |
| 359.6505                | -14441.9186 | -1755.7373 | 0.0000      | 0.0000    |
| 8011.1341               | 6819.5189   | 305.4775   | -1191.6152  | 6883.7146 |
| 308.8741                | -91.7014    | 0.1446     | 680285.8938 | -13.1386  |
| -13.1506                |             |            |             |           |

## Supplementary Text 6

|                         |             |            |             |
|-------------------------|-------------|------------|-------------|
| [42457]ENERGY: 10750000 | 3315.6845   | 5479.6398  | 5736.6528   |
| 333.9087                | -14298.7652 | -1795.3756 | 0.0000      |
| 8047.8938               | 6819.6388   | 306.8792   | -1228.2550  |
| 308.6531                | 5.4050      | -27.8181   | 680285.8938 |
| -13.2162                |             |            | -13.2178    |
| [42493]ENERGY: 10760000 | 3311.8514   | 5481.2081  | 5709.4698   |
| 346.6325                | -14347.3270 | -1759.7597 | 0.0000      |
| 8078.3242               | 6820.3993   | 308.0395   | -1257.9249  |
| 309.0125                | 16.5591     | 85.9098    | 680285.8938 |
| -10.3214                |             |            | -10.3232    |
| [42543]ENERGY: 10770000 | 3247.9927   | 5567.8444  | 5736.2362   |
| 340.1693                | -14323.3706 | -1843.1621 | 0.0000      |
| 8093.7550               | 6819.4649   | 308.6279   | -1274.2901  |
| 308.9895                | -39.2145    | -37.2054   | 680285.8938 |
| -11.8727                |             |            | -11.8868    |
| [42579]ENERGY: 10780000 | 3355.7496   | 5362.4983  | 5714.9011   |
| 336.0381                | -14276.5400 | -1768.3471 | 0.0000      |
| 8094.0624               | 6818.3624   | 308.6396   | -1275.6999  |
| 308.6666                | -166.9246   | -183.5063  | 680285.8938 |
| -15.8633                |             |            | -15.8446    |
| [42629]ENERGY: 10790000 | 3373.4578   | 5423.8512  | 5729.5247   |
| 360.6471                | -14325.4223 | -1806.1224 | 0.0000      |
| 8060.0911               | 6816.0273   | 307.3443   | -1244.0639  |
| 308.6887                | -239.3582   | -223.4032  | 680285.8938 |
| -14.6949                |             |            | -14.6982    |
| [42668]ENERGY: 10800000 | 3327.3985   | 5448.3803  | 5710.0061   |
| 335.6572                | -14335.4930 | -1800.0554 | 0.0000      |
| 8131.0359               | 6816.9296   | 310.0495   | -1314.1063  |
| 308.7971                | 44.9054     | -28.7769   | 680285.8938 |
| -16.9500                |             |            | -16.9532    |
| [42718]ENERGY: 10810000 | 3320.0289   | 5486.1470  | 5705.2587   |
| 346.4643                | -14329.6984 | -1772.9834 | 0.0000      |
| 8060.0224               | 6815.2395   | 307.3417   | -1244.7829  |
| 308.7461                | 141.7130    | 110.9269   | 680285.8938 |
| -17.7699                |             |            | -17.7717    |
| [42754]ENERGY: 10820000 | 3330.5209   | 5457.1561  | 5731.6452   |
| 325.5769                | -14331.4998 | -1803.5432 | 0.0000      |
| 8106.7973               | 6816.6534   | 309.1253   | -1290.1440  |
| 308.8906                | 17.3547     | -59.7580   | 680285.8938 |
| -19.4228                |             |            | -19.4193    |
| [42804]ENERGY: 10830000 | 3326.0893   | 5478.1145  | 5707.2873   |
| 330.0903                | -14288.2253 | -1762.2468 | 0.0000      |
| 8029.2494               | 6820.3587   | 306.1682   | -1208.8907  |
| 308.6612                | -19.7002    | 0.7949     | 680285.8938 |
| -15.2404                |             |            | -15.2384    |
| [42840]ENERGY: 10840000 | 3376.5694   | 5462.5563  | 5736.4280   |
| 347.4620                | -14297.5858 | -1870.0570 | 0.0000      |
| 8064.5967               | 6819.9696   | 307.5161   | -1244.6271  |
| 308.8356                | -48.8493    | -90.1180   | 680285.8938 |
| -13.7284                |             |            | -13.7297    |
| [42890]ENERGY: 10850000 | 3329.7885   | 5455.5602  | 5737.8602   |
| 347.1715                | -14336.5675 | -1748.6968 | 0.0000      |
| 8036.0665               | 6821.1825   | 306.4282   | -1214.8840  |
| 308.9357                | 75.5230     | 87.3285    | 680285.8938 |
|                         |             |            | -17.0095    |

Supplementary Text 6

-16.9992  
 [42926]ENERGY: 10860000      3262.2420      5450.2477      5648.0730  
 350.4858      -14194.7974      -1804.2559      0.0000      0.0000  
 8105.0343      6817.0295      309.0580      -1288.0048      6883.2521  
 308.6971      105.4039      81.9242      680285.8938      -19.7987  
 -19.8218  
 [42976]ENERGY: 10870000      3367.0507      5474.2677      5754.8818  
 335.6898      -14360.4620      -1796.9903      0.0000      0.0000  
 8044.4529      6818.8906      306.7480      -1225.5622      6884.4972  
 308.6762      -127.6109      -138.9860      680285.8938      -17.1858  
 -17.1518  
 [43012]ENERGY: 10880000      3340.0673      5478.3042      5716.5458  
 338.4465      -14333.4048      -1788.4191      0.0000      0.0000  
 8067.8998      6819.4397      307.6420      -1248.4601      6883.1965  
 308.7172      117.5682      41.2024      680285.8938      -13.9447  
 -13.9690  
 [43062]ENERGY: 10890000      3298.0321      5449.7920      5726.9949  
 322.8690      -14362.9095      -1703.5197      0.0000      0.0000  
 8089.3120      6820.5709      308.4585      -1268.7410      6882.8568  
 308.6372      100.2382      102.6090      680285.8938      -16.1194  
 -16.1171  
 [43101]ENERGY: 10900000      3317.5512      5436.2969      5682.0487  
 369.4056      -14317.3261      -1856.4859      0.0000      0.0000  
 8183.3135      6814.8039      312.0429      -1368.5096      6884.6232  
 308.7906      -23.0740      -28.2252      680285.8938      -10.0898  
 -10.0935  
 [43151]ENERGY: 10910000      3375.6814      5419.6241      5707.9331  
 332.3632      -14298.5659      -1782.2634      0.0000      0.0000  
 8064.9612      6819.7337      307.5300      -1245.2275      6884.3191  
 308.8820      18.6947      -30.9554      680285.8938      -13.8078  
 -13.8070  
 [43187]ENERGY: 10920000      3277.1204      5384.6789      5723.5237  
 315.1305      -14258.9039      -1753.3288      0.0000      0.0000  
 8126.8297      6815.0505      309.8891      -1311.7792      6882.9883  
 308.8314      64.2098      71.0942      680285.8938      -14.8597  
 -14.8422  
 [43237]ENERGY: 10930000      3321.6192      5494.2187      5721.5200  
 344.4184      -14332.5148      -1844.3271      0.0000      0.0000  
 8111.2579      6816.1922      309.2953      -1295.0657      6882.6056  
 308.6069      -176.4113      -75.0655      680285.8938      -20.8190  
 -20.8443  
 [43273]ENERGY: 10940000      3333.0772      5494.3331      5770.6004  
 354.9219      -14379.3479      -1791.4446      0.0000      0.0000  
 8037.4696      6819.6098      306.4817      -1217.8598      6883.6104  
 308.8553      10.0517      -73.3409      680285.8938      -15.7141  
 -15.7141  
 [43323]ENERGY: 10950000      3243.8957      5465.8466      5762.0209  
 369.5008      -14341.2295      -1777.9283      0.0000      0.0000  
 8095.7124      6817.8185      308.7026      -1277.8939      6882.7826  
 308.7622      -56.4048      -115.9830      680285.8938      -16.5140  
 -16.4986  
 [43359]ENERGY: 10960000      3357.0811      5452.9489      5715.0933  
 347.3939      -14429.6685      -1731.1720      0.0000      0.0000  
 8106.1974      6817.8741      309.1024      -1288.3233      6883.6366

## Supplementary Text 6

|                         |             |            |             |           |
|-------------------------|-------------|------------|-------------|-----------|
| 308.9043                | 200.1176    | 45.5874    | 680285.8938 | -15.4225  |
| -15.4265                |             |            |             |           |
| [43409]ENERGY: 10970000 | 3370.6640   | 5489.1944  | 5720.1392   |           |
| 327.6487                | -14425.5467 | -1777.8762 | 0.0000      | 0.0000    |
| 8113.2947               | 6817.5181   | 309.3730   | -1295.7766  | 6885.1100 |
| 308.9692                | -100.0975   | -50.7046   | 680285.8938 | -11.2091  |
| -11.2008                |             |            |             |           |
| [43445]ENERGY: 10980000 | 3351.5819   | 5416.2243  | 5723.1060   |           |
| 360.2832                | -14303.8492 | -1799.5788 | 0.0000      | 0.0000    |
| 8070.9066               | 6818.6741   | 307.7567   | -1252.2325  | 6883.8049 |
| 308.7577                | -47.5294    | -95.3763   | 680285.8938 | -9.9867   |
| -10.0086                |             |            |             |           |
| [43495]ENERGY: 10990000 | 3381.1509   | 5454.8131  | 5786.6725   |           |
| 324.0349                | -14388.0644 | -1756.0958 | 0.0000      | 0.0000    |
| 8017.3756               | 6819.8867   | 305.7155   | -1197.4889  | 6885.6524 |
| 308.9278                | -19.9059    | -55.1728   | 680285.8938 | -13.3563  |
| -13.3456                |             |            |             |           |
| [43534]ENERGY: 11000000 | 3294.6098   | 5452.3133  | 5711.3377   |           |
| 365.6265                | -14311.0760 | -1799.6283 | 0.0000      | 0.0000    |
| 8105.4169               | 6818.5999   | 309.0726   | -1286.8170  | 6885.1089 |
| 308.6374                | 86.0328     | 65.6667    | 680285.8938 | -18.9896  |
| -18.9948                |             |            |             |           |
| [268]ENERGY: 11010000   | 3320.5106   | 5448.1170  | 5734.4918   |           |
| 318.0675                | -14357.9019 | -1751.0344 | 0.0000      | 0.0000    |
| 8106.2321               | 6818.4827   | 309.1037   | -1287.7494  | 6884.8622 |
| 308.8820                | 39.5606     | 3.4171     | 680285.8938 | -15.6539  |
| -15.6620                |             |            |             |           |
| [307]ENERGY: 11020000   | 3376.4314   | 5374.6354  | 5725.5252   |           |
| 315.3077                | -14249.1423 | -1838.1849 | 0.0000      | 0.0000    |
| 8114.5583               | 6819.1309   | 309.4212   | -1295.4274  | 6885.5044 |
| 308.7539                | -14.4047    | -44.0385   | 680285.8938 | -13.5385  |
| -13.5099                |             |            |             |           |
| [359]ENERGY: 11030000   | 3337.3965   | 5418.2168  | 5706.7587   |           |
| 334.7096                | -14329.4808 | -1727.1089 | 0.0000      | 0.0000    |
| 8080.7815               | 6821.2735   | 308.1332   | -1259.5079  | 6884.8608 |
| 308.8359                | 83.9647     | 16.6910    | 680285.8938 | -15.4840  |
| -15.5043                |             |            |             |           |
| [397]ENERGY: 11040000   | 3323.3114   | 5455.7089  | 5760.1204   |           |
| 326.5673                | -14325.4030 | -1834.7451 | 0.0000      | 0.0000    |
| 8116.4789               | 6822.0388   | 309.4944   | -1294.4401  | 6886.2816 |
| 308.7298                | 21.6582     | 17.9814    | 680285.8938 | -17.2724  |
| -17.2578                |             |            |             |           |
| [449]ENERGY: 11050000   | 3277.3529   | 5548.7865  | 5695.6170   |           |
| 344.7476                | -14382.3101 | -1726.0660 | 0.0000      | 0.0000    |
| 8062.7498               | 6820.8779   | 307.4457   | -1241.8720  | 6885.4460 |
| 308.8321                | 91.0200     | 85.5271    | 680285.8938 | -14.0331  |
| -14.0240                |             |            |             |           |
| [487]ENERGY: 11060000   | 3334.3216   | 5436.9391  | 5685.3184   |           |
| 323.4914                | -14357.3725 | -1820.2321 | 0.0000      | 0.0000    |
| 8215.3174               | 6817.7832   | 313.2633   | -1397.5342  | 6886.8068 |
| 308.9768                | 100.2241    | 0.6784     | 680285.8938 | -13.7824  |
| -13.7989                |             |            |             |           |
| [538]ENERGY: 11070000   | 3274.8645   | 5409.0722  | 5723.9850   |           |
| 351.2697                | -14337.2258 | -1732.3077 | 0.0000      | 0.0000    |

## Supplementary Text 6

|                        |             |            |             |           |
|------------------------|-------------|------------|-------------|-----------|
| 8130.6112              | 6820.2690   | 310.0333   | -1310.3422  | 6886.3964 |
| 308.9379               | 147.0256    | 105.1415   | 680285.8938 | -13.6866  |
| -13.6857               |             |            |             |           |
| [575]ENERGY: 11080000  | 3358.0929   | 5493.8629  | 5736.4514   |           |
| 333.3438               | -14369.3537 | -1762.8152 | 0.0000      | 0.0000    |
| 8031.8025              | 6821.3846   | 306.2656   | -1210.4179  | 6886.2620 |
| 308.9402               | 28.6117     | 13.9070    | 680285.8938 | -17.0268  |
| -17.0429               |             |            |             |           |
| [626]ENERGY: 11090000  | 3379.7842   | 5434.8489  | 5699.4440   |           |
| 357.4433               | -14404.3072 | -1772.5292 | 0.0000      | 0.0000    |
| 8123.3315              | 6818.0155   | 309.7557   | -1305.3160  | 6886.0463 |
| 308.9764               | -86.2667    | -60.1166   | 680285.8938 | -13.0833  |
| -13.0618               |             |            |             |           |
| [666]ENERGY: 11100000  | 3360.4135   | 5476.1985  | 5703.4595   |           |
| 339.8463               | -14354.4994 | -1764.2910 | 0.0000      | 0.0000    |
| 8060.0269              | 6821.1543   | 307.3418   | -1238.8726  | 6886.7739 |
| 308.9744               | 66.3717     | 40.2309    | 680285.8938 | -16.6000  |
| -16.5936               |             |            |             |           |
| [717]ENERGY: 11110000  | 3355.9813   | 5487.2725  | 5647.6169   |           |
| 307.1635               | -14264.1226 | -1741.6846 | 0.0000      | 0.0000    |
| 8032.1315              | 6824.3585   | 306.2781   | -1207.7730  | 6887.4236 |
| 308.9927               | 55.4396     | 142.8623   | 680285.8938 | -19.4265  |
| -19.4257               |             |            |             |           |
| [753]ENERGY: 11120000  | 3335.7624   | 5390.6248  | 5742.1022   |           |
| 336.3099               | -14323.7308 | -1785.6438 | 0.0000      | 0.0000    |
| 8125.3549              | 6820.7796   | 309.8329   | -1304.5753  | 6887.4811 |
| 309.0184               | -57.6947    | -8.4970    | 680285.8938 | -13.0353  |
| -13.0442               |             |            |             |           |
| [803]ENERGY: 11130000  | 3260.9402   | 5458.7310  | 5701.9091   |           |
| 358.0477               | -14243.6010 | -1783.5362 | 0.0000      | 0.0000    |
| 8072.1147              | 6824.6054   | 307.8027   | -1247.5093  | 6889.4148 |
| 308.9963               | 255.2630    | 124.9644   | 680285.8938 | -11.9903  |
| -12.0131               |             |            |             |           |
| [839]ENERGY: 11140000  | 3293.8430   | 5376.7203  | 5704.8375   |           |
| 342.4486               | -14261.8720 | -1805.0907 | 0.0000      | 0.0000    |
| 8169.8449              | 6820.7316   | 311.5294   | -1349.1133  | 6888.4634 |
| 308.9231               | -46.8553    | -82.1899   | 680285.8938 | -14.2410  |
| -14.2249               |             |            |             |           |
| [889]ENERGY: 11150000  | 3371.0907   | 5411.3810  | 5677.6493   |           |
| 382.8085               | -14309.6243 | -1793.0323 | 0.0000      | 0.0000    |
| 8084.1997              | 6824.4726   | 308.2636   | -1259.7271  | 6887.5590 |
| 309.1649               | -24.5869    | -20.8170   | 680285.8938 | -13.6282  |
| -13.6191               |             |            |             |           |
| [925]ENERGY: 11160000  | 3318.4602   | 5543.2539  | 5664.1906   |           |
| 345.3077               | -14399.4558 | -1713.2451 | 0.0000      | 0.0000    |
| 8064.9002              | 6823.4118   | 307.5277   | -1241.4885  | 6888.1995 |
| 309.3124               | 174.5437    | 27.7365    | 680285.8938 | -12.4526  |
| -12.4749               |             |            |             |           |
| [975]ENERGY: 11170000  | 3363.5110   | 5449.7006  | 5698.5956   |           |
| 342.6959               | -14348.8200 | -1784.1662 | 0.0000      | 0.0000    |
| 8098.8117              | 6820.3286   | 308.8207   | -1278.4830  | 6888.2686 |
| 309.2294               | -98.4571    | -52.5776   | 680285.8938 | -14.5666  |
| -14.5527               |             |            |             |           |
| [1011]ENERGY: 11180000 | 3356.8657   | 5382.1545  | 5658.1571   |           |

## Supplementary Text 6

|                        |             |            |             |           |
|------------------------|-------------|------------|-------------|-----------|
| 336.2644               | -14272.5680 | -1770.0032 | 0.0000      | 0.0000    |
| 8133.8779              | 6824.7484   | 310.1579   | -1309.1295  | 6888.8764 |
| 309.2166               | -42.0239    | -126.0820  | 680285.8938 | -14.3005  |
| -14.3002               |             |            |             |           |
| [1061]ENERGY: 11190000 | 3372.3172   | 5412.3043  | 5752.9723   |           |
| 339.6431               | -14271.8614 | -1840.1794 | 0.0000      | 0.0000    |
| 8059.9496              | 6825.1458   | 307.3389   | -1234.8039  | 6888.9834 |
| 309.1519               | -71.3452    | -38.4655   | 680285.8938 | -16.2491  |
| -16.2508               |             |            |             |           |
| [1100]ENERGY: 11200000 | 3367.2437   | 5501.9656  | 5716.2143   |           |
| 350.0024               | -14400.9916 | -1787.5515 | 0.0000      | 0.0000    |
| 8076.0869              | 6822.9698   | 307.9542   | -1253.1171  | 6889.2812 |
| 309.1204               | -50.3838    | -81.4713   | 680285.8938 | -10.8427  |
| -10.8419               |             |            |             |           |
| [1150]ENERGY: 11210000 | 3371.8629   | 5464.7823  | 5698.6384   |           |
| 355.7156               | -14313.5425 | -1804.8353 | 0.0000      | 0.0000    |
| 8052.2958              | 6824.9172   | 307.0470   | -1227.3786  | 6889.5222 |
| 309.0959               | -30.9775    | 32.1563    | 680285.8938 | -14.7836  |
| -14.7888               |             |            |             |           |
| [1186]ENERGY: 11220000 | 3307.1087   | 5445.7753  | 5702.6225   |           |
| 354.8591               | -14386.4044 | -1749.1074 | 0.0000      | 0.0000    |
| 8147.6980              | 6822.5519   | 310.6849   | -1325.1461  | 6889.2029 |
| 309.1424               | 209.8605    | 133.2372   | 680285.8938 | -15.5606  |
| -15.5501               |             |            |             |           |
| [1236]ENERGY: 11230000 | 3348.2180   | 5428.1347  | 5769.9362   |           |
| 337.8298               | -14299.0493 | -1862.7991 | 0.0000      | 0.0000    |
| 8100.3501              | 6822.6203   | 308.8794   | -1277.7298  | 6888.6466 |
| 309.1161               | 77.9794     | -3.0004    | 680285.8938 | -14.1424  |
| -14.1569               |             |            |             |           |
| [1272]ENERGY: 11240000 | 3299.3712   | 5397.8126  | 5764.8693   |           |
| 341.1973               | -14217.1111 | -1834.9876 | 0.0000      | 0.0000    |
| 8074.3988              | 6825.5506   | 307.8898   | -1248.8483  | 6889.5071 |
| 308.9335               | -58.5082    | -108.3714  | 680285.8938 | -12.5328  |
| -12.5089               |             |            |             |           |
| [1322]ENERGY: 11250000 | 3362.2721   | 5429.6244  | 5685.0068   |           |
| 347.3377               | -14359.4407 | -1765.5744 | 0.0000      | 0.0000    |
| 8124.0415              | 6823.2674   | 309.7828   | -1300.7741  | 6888.5573 |
| 308.9721               | -58.6499    | -2.7699    | 680285.8938 | -15.9495  |
| -15.9827               |             |            |             |           |
| [1358]ENERGY: 11260000 | 3263.5615   | 5459.0587  | 5779.1286   |           |
| 345.7573               | -14317.4858 | -1802.3494 | 0.0000      | 0.0000    |
| 8095.7812              | 6823.4520   | 308.7052   | -1272.3291  | 6888.5923 |
| 309.2891               | -53.6925    | 19.9559    | 680285.8938 | -14.5430  |
| -14.5345               |             |            |             |           |
| [1408]ENERGY: 11270000 | 3346.8551   | 5496.4809  | 5717.6892   |           |
| 328.6975               | -14333.4734 | -1799.9529 | 0.0000      | 0.0000    |
| 8070.7780              | 6827.0743   | 307.7518   | -1243.7036  | 6889.4259 |
| 309.2913               | -38.2132    | -32.5251   | 680285.8938 | -15.3473  |
| -15.3349               |             |            |             |           |
| [1444]ENERGY: 11280000 | 3332.6452   | 5439.2362  | 5748.0883   |           |
| 333.5117               | -14395.5930 | -1731.9701 | 0.0000      | 0.0000    |
| 8097.3611              | 6823.2793   | 308.7654   | -1274.0818  | 6890.5527 |
| 308.9542               | 5.1083      | 49.8542    | 680285.8938 | -15.1198  |
| -15.1303               |             |            |             |           |



## Supplementary Text 6

|                        |             |            |             |           |
|------------------------|-------------|------------|-------------|-----------|
| [1494]ENERGY: 11290000 | 3403.5252   | 5513.4426  | 5725.9765   |           |
| 344.1493               | -14268.9026 | -1836.9910 | 0.0000      | 0.0000    |
| 7954.0182              | 6835.2183   | 303.2995   | -1118.8000  | 6891.2018 |
| 309.0524               | 32.2326     | 12.6999    | 680285.8938 | -18.2816  |
| -18.2703               |             |            |             |           |
| [1533]ENERGY: 11300000 | 3350.0079   | 5400.4149  | 5692.3261   |           |
| 324.0131               | -14339.7698 | -1724.7572 | 0.0000      | 0.0000    |
| 8123.9521              | 6826.1871   | 309.7794   | -1297.7650  | 6890.4550 |
| 309.0843               | 51.3861     | -28.9720   | 680285.8938 | -15.3425  |
| -15.3443               |             |            |             |           |
| [1583]ENERGY: 11310000 | 3331.6617   | 5436.1057  | 5740.6444   |           |
| 350.6043               | -14220.7621 | -1887.4963 | 0.0000      | 0.0000    |
| 8073.2439              | 6824.0015   | 307.8458   | -1249.2424  | 6890.5480 |
| 309.1214               | -161.2366   | -231.6127  | 680285.8938 | -16.0427  |
| -16.0331               |             |            |             |           |
| [1619]ENERGY: 11320000 | 3239.0338   | 5480.1042  | 5762.9946   |           |
| 346.6042               | -14349.9933 | -1784.7414 | 0.0000      | 0.0000    |
| 8131.5550              | 6825.5573   | 310.0693   | -1305.9978  | 6891.3957 |
| 309.1896               | 66.9972     | -13.6478   | 680285.8938 | -15.4583  |
| -15.4704               |             |            |             |           |
| [1669]ENERGY: 11330000 | 3256.0731   | 5513.6156  | 5744.4285   |           |
| 339.8170               | -14321.1622 | -1760.3802 | 0.0000      | 0.0000    |
| 8058.4348              | 6830.8266   | 307.2811   | -1227.6082  | 6892.4694 |
| 309.0845               | 91.9885     | 37.5111    | 680285.8938 | -18.4857  |
| -18.4732               |             |            |             |           |
| [1705]ENERGY: 11340000 | 3292.3750   | 5502.7186  | 5774.3874   |           |
| 341.3405               | -14338.8887 | -1770.9899 | 0.0000      | 0.0000    |
| 8028.2042              | 6829.1471   | 306.1284   | -1199.0571  | 6892.1045 |
| 309.0666               | 27.6404     | -38.2034   | 680285.8938 | -16.2819  |
| -16.2898               |             |            |             |           |
| [1755]ENERGY: 11350000 | 3335.3195   | 5510.3221  | 5699.3296   |           |
| 347.1702               | -14327.2677 | -1855.0815 | 0.0000      | 0.0000    |
| 8118.8062              | 6828.5985   | 309.5832   | -1290.2077  | 6892.7528 |
| 309.1197               | 8.5354      | 36.4117    | 680285.8938 | -18.2743  |
| -18.2604               |             |            |             |           |
| [1791]ENERGY: 11360000 | 3389.2153   | 5496.9926  | 5734.0224   |           |
| 340.5613               | -14409.2546 | -1790.6077 | 0.0000      | 0.0000    |
| 8068.8661              | 6829.7955   | 307.6789   | -1239.0707  | 6892.1181 |
| 308.9758               | 145.7549    | 68.4302    | 680285.8938 | -15.0480  |
| -15.0727               |             |            |             |           |
| [1841]ENERGY: 11370000 | 3359.4653   | 5467.4122  | 5729.5101   |           |
| 352.8801               | -14317.2102 | -1807.5754 | 0.0000      | 0.0000    |
| 8045.0264              | 6829.5084   | 306.7698   | -1215.5180  | 6893.2422 |
| 308.9870               | 121.8283    | 83.9783    | 680285.8938 | -15.7399  |
| -15.7446               |             |            |             |           |
| [1877]ENERGY: 11380000 | 3302.8918   | 5477.6200  | 5723.1230   |           |
| 335.8811               | -14369.9971 | -1789.1615 | 0.0000      | 0.0000    |
| 8146.5219              | 6826.8792   | 310.6400   | -1319.6428  | 6893.9381 |
| 308.9460               | -105.1648   | -47.3744   | 680285.8938 | -16.0505  |
| -16.0349               |             |            |             |           |
| [1927]ENERGY: 11390000 | 3316.0643   | 5513.5584  | 5740.5491   |           |
| 387.7312               | -14407.8127 | -1776.6642 | 0.0000      | 0.0000    |
| 8056.5446              | 6829.9707   | 307.2090   | -1226.5739  | 6894.4164 |
| 309.0770               | 58.1178     | 75.0092    | 680285.8938 | -14.5471  |

Supplementary Text 6

-14.5482  
 [1966]ENERGY: 11400000 3284.6674 5545.2573 5747.0819  
 334.4272 -14353.9003 -1801.8449 0.0000 0.0000  
 8072.9263 6828.6150 307.8337 -1244.3113 6893.6091  
 309.0683 -7.3972 -32.6845 680285.8938 -16.3164  
 -16.3235  
 [2016]ENERGY: 11410000 3286.8431 5425.2238 5736.4709  
 358.6401 -14340.5282 -1765.0344 0.0000 0.0000  
 8123.2651 6824.8804 309.7532 -1298.3847 6893.4588  
 309.1424 114.0045 106.4729 680285.8938 -13.9474  
 -13.9340  
 [2052]ENERGY: 11420000 3336.3782 5501.1617 5744.8401  
 345.5804 -14308.8510 -1814.4829 0.0000 0.0000  
 8027.1347 6831.7612 306.0876 -1195.3735 6894.8009  
 308.8179 111.9488 27.6507 680285.8938 -21.3645  
 -21.3932  
 [2102]ENERGY: 11430000 3385.3710 5524.4898 5711.3220  
 338.4479 -14430.0229 -1769.1636 0.0000 0.0000  
 8067.9042 6828.3485 307.6422 -1239.5558 6893.0792  
 308.9476 -55.3445 -13.2561 680285.8938 -19.6273  
 -19.5957  
 [2138]ENERGY: 11440000 3263.0888 5373.4922 5760.7308  
 354.7981 -14307.7850 -1840.4404 0.0000 0.0000  
 8220.1585 6824.0430 313.4479 -1396.1156 6894.1859  
 309.1762 -43.7150 -138.4314 680285.8938 -19.6277  
 -19.6448  
 [2188]ENERGY: 11450000 3365.8251 5408.8587 5681.9161  
 359.6182 -14357.8211 -1702.1864 0.0000 0.0000  
 8076.0821 6832.2927 307.9540 -1243.7894 6894.7104  
 309.1266 29.9713 8.6379 680285.8938 -17.8480  
 -17.8425  
 [2224]ENERGY: 11460000 3317.8626 5383.0856 5708.8931  
 342.2130 -14238.7805 -1782.1213 0.0000 0.0000  
 8100.3552 6831.5077 308.8796 -1268.8475 6895.1054  
 308.9543 95.4078 48.0380 680285.8938 -18.1246  
 -18.1232  
 [2274]ENERGY: 11470000 3302.3602 5478.7386 5722.7073  
 325.8737 -14251.9342 -1814.7945 0.0000 0.0000  
 8066.8834 6829.8345 307.6033 -1237.0490 6896.2526  
 309.0343 118.9317 14.8704 680285.8938 -14.3935  
 -14.3864  
 [2310]ENERGY: 11480000 3338.1582 5519.1908 5696.7992  
 340.8877 -14283.4440 -1808.7018 0.0000 0.0000  
 8026.0356 6828.9258 306.0457 -1197.1098 6895.7066  
 308.9784 -78.2287 -42.6187 680285.8938 -13.9948  
 -13.9951  
 [2360]ENERGY: 11490000 3373.4736 5480.2643 5707.2402  
 355.1781 -14402.9889 -1759.3402 0.0000 0.0000  
 8074.8311 6828.6582 307.9063 -1246.1729 6895.2823  
 309.0925 25.8183 -74.2250 680285.8938 -15.0605  
 -15.0669  
 [2399]ENERGY: 11500000 3319.9022 5354.1049 5754.9140  
 322.9389 -14376.5047 -1752.9402 0.0000 0.0000  
 8204.2101 6826.6251 312.8398 -1377.5850 6896.2467

Supplementary Text 6

|                        |             |            |             |           |
|------------------------|-------------|------------|-------------|-----------|
| 309.1473               | -16.2674    | -37.1287   | 680285.8938 | -15.2631  |
| -15.2599               |             |            |             |           |
| [2449]ENERGY: 11510000 | 3279.0079   | 5465.5801  | 5658.4287   |           |
| 327.7480               | -14302.7129 | -1754.9948 | 0.0000      | 0.0000    |
| 8155.0580              | 6828.1150   | 310.9655   | -1326.9430  | 6894.9303 |
| 309.0994               | -19.5643    | -2.0163    | 680285.8938 | -12.1624  |
| -12.1811               |             |            |             |           |
| [2485]ENERGY: 11520000 | 3368.5586   | 5486.0568  | 5701.7340   |           |
| 347.2333               | -14341.9921 | -1785.8508 | 0.0000      | 0.0000    |
| 8056.1861              | 6831.9259   | 307.1954   | -1224.2602  | 6894.3791 |
| 308.9859               | 99.1359     | 58.1199    | 680285.8938 | -10.4047  |
| -10.3901               |             |            |             |           |
| [2535]ENERGY: 11530000 | 3330.3253   | 5461.0295  | 5709.6775   |           |
| 334.6625               | -14399.4786 | -1703.7183 | 0.0000      | 0.0000    |
| 8098.7316              | 6831.2295   | 308.8177   | -1267.5021  | 6896.1771 |
| 309.2160               | 97.6587     | 76.0194    | 680285.8938 | -13.1817  |
| -13.1815               |             |            |             |           |
| [2571]ENERGY: 11540000 | 3330.6799   | 5489.2498  | 5683.0810   |           |
| 345.0574               | -14341.7968 | -1760.4607 | 0.0000      | 0.0000    |
| 8089.0316              | 6834.8422   | 308.4478   | -1254.1894  | 6896.5789 |
| 309.0585               | -25.2383    | -21.2003   | 680285.8938 | -13.7180  |
| -13.7146               |             |            |             |           |
| [2621]ENERGY: 11550000 | 3300.3915   | 5559.5190  | 5676.3493   |           |
| 344.4370               | -14386.8837 | -1699.0707 | 0.0000      | 0.0000    |
| 8037.8607              | 6832.6030   | 306.4966   | -1205.2577  | 6897.3047 |
| 309.2766               | -21.5454    | -21.5853   | 680285.8938 | -13.8918  |
| -13.8943               |             |            |             |           |
| [2657]ENERGY: 11560000 | 3285.9307   | 5490.4423  | 5700.9185   |           |
| 338.8975               | -14329.3796 | -1730.8425 | 0.0000      | 0.0000    |
| 8080.2685              | 6836.2353   | 308.1137   | -1244.0332  | 6899.4595 |
| 309.1347               | 38.3783     | -45.0559   | 680285.8938 | -12.0632  |
| -12.0608               |             |            |             |           |
| [2707]ENERGY: 11570000 | 3361.7349   | 5418.2195  | 5745.3799   |           |
| 340.6612               | -14347.7088 | -1802.8442 | 0.0000      | 0.0000    |
| 8118.2241              | 6833.6666   | 309.5610   | -1284.5575  | 6898.6769 |
| 309.2522               | 100.4932    | 13.6196    | 680285.8938 | -16.3766  |
| -16.3863               |             |            |             |           |
| [2743]ENERGY: 11580000 | 3382.8065   | 5411.1318  | 5665.5537   |           |
| 355.9263               | -14340.8682 | -1789.8569 | 0.0000      | 0.0000    |
| 8149.3442              | 6834.0374   | 310.7476   | -1315.3068  | 6899.0588 |
| 309.0773               | -1.7555     | -119.0495  | 680285.8938 | -17.5806  |
| -17.5655               |             |            |             |           |
| [2793]ENERGY: 11590000 | 3377.7194   | 5394.4692  | 5667.6796   |           |
| 338.5903               | -14300.1530 | -1767.5288 | 0.0000      | 0.0000    |
| 8122.6897              | 6833.4665   | 309.7313   | -1289.2233  | 6897.5696 |
| 309.1820               | -53.2608    | 6.0698     | 680285.8938 | -14.4338  |
| -14.4117               |             |            |             |           |
| [2832]ENERGY: 11600000 | 3352.6613   | 5423.0101  | 5702.1745   |           |
| 344.1536               | -14350.0337 | -1767.9989 | 0.0000      | 0.0000    |
| 8131.7867              | 6835.7537   | 310.0781   | -1296.0330  | 6900.4854 |
| 309.2217               | 23.7982     | 42.5102    | 680285.8938 | -15.6191  |
| -15.6508               |             |            |             |           |
| [2882]ENERGY: 11610000 | 3343.8143   | 5496.1095  | 5703.3196   |           |
| 329.8928               | -14386.2708 | -1779.2085 | 0.0000      | 0.0000    |

Supplementary Text 6

|                        |             |            |             |           |
|------------------------|-------------|------------|-------------|-----------|
| 8125.7574              | 6833.4143   | 309.8482   | -1292.3431  | 6899.4088 |
| 309.0361               | 97.7388     | 22.8067    | 680285.8938 | -12.3009  |
| -12.3127               |             |            |             |           |
| [2918]ENERGY: 11620000 | 3335.2895   | 5505.4075  | 5711.2639   |           |
| 326.2694               | -14418.5005 | -1735.0549 | 0.0000      | 0.0000    |
| 8105.6376              | 6830.3125   | 309.0810   | -1275.3251  | 6899.3744 |
| 309.1023               | 22.0032     | 47.4431    | 680285.8938 | -10.2725  |
| -10.2616               |             |            |             |           |
| [2968]ENERGY: 11630000 | 3351.7471   | 5481.1961  | 5693.4362   |           |
| 314.4345               | -14324.6849 | -1883.1800 | 0.0000      | 0.0000    |
| 8198.4790              | 6831.4279   | 312.6212   | -1367.0511  | 6899.2613 |
| 309.2059               | -173.2269   | -101.3799  | 680285.8938 | -14.7864  |
| -14.7840               |             |            |             |           |
| [3004]ENERGY: 11640000 | 3268.2466   | 5478.2340  | 5693.0658   |           |
| 358.2170               | -14250.1073 | -1825.8725 | 0.0000      | 0.0000    |
| 8112.2260              | 6834.0095   | 309.3323   | -1278.2164  | 6901.2100 |
| 308.9999               | 5.0991      | -30.9036   | 680285.8938 | -15.1875  |
| -15.1826               |             |            |             |           |
| [3054]ENERGY: 11650000 | 3414.5246   | 5528.6062  | 5731.5903   |           |
| 341.5309               | -14424.0453 | -1761.0081 | 0.0000      | 0.0000    |
| 8008.2100              | 6839.4087   | 305.3660   | -1168.8014  | 6901.8127 |
| 308.8775               | 17.4594     | 29.1422    | 680285.8938 | -15.9255  |
| -15.9277               |             |            |             |           |
| [3090]ENERGY: 11660000 | 3263.7084   | 5500.7642  | 5734.3973   |           |
| 345.6518               | -14328.3274 | -1785.7131 | 0.0000      | 0.0000    |
| 8104.5120              | 6834.9931   | 309.0381   | -1269.5189  | 6902.1945 |
| 309.0215               | 85.8495     | 30.4674    | 680285.8938 | -13.8731  |
| -13.8904               |             |            |             |           |
| [3140]ENERGY: 11670000 | 3309.8221   | 5340.3018  | 5701.8995   |           |
| 341.6917               | -14290.5406 | -1751.9103 | 0.0000      | 0.0000    |
| 8182.4301              | 6833.6944   | 312.0093   | -1348.7357  | 6901.4639 |
| 309.1137               | 117.0014    | 64.0455    | 680285.8938 | -14.1165  |
| -14.1000               |             |            |             |           |
| [3176]ENERGY: 11680000 | 3363.2946   | 5486.9095  | 5753.7808   |           |
| 366.5492               | -14413.7745 | -1807.0289 | 0.0000      | 0.0000    |
| 8089.6350              | 6839.3657   | 308.4708   | -1250.2693  | 6903.1343 |
| 309.0113               | -37.1612    | -77.8819   | 680285.8938 | -15.6836  |
| -15.6733               |             |            |             |           |
| [3226]ENERGY: 11690000 | 3280.0806   | 5446.4941  | 5760.9446   |           |
| 334.1188               | -14226.8447 | -1845.6609 | 0.0000      | 0.0000    |
| 8090.6797              | 6839.8122   | 308.5107   | -1250.8675  | 6903.8033 |
| 309.1020               | 153.0728    | 56.4418    | 680285.8938 | -14.1957  |
| -14.2253               |             |            |             |           |
| [3265]ENERGY: 11700000 | 3316.8645   | 5522.3058  | 5680.7473   |           |
| 332.6634               | -14159.8887 | -1858.1517 | 0.0000      | 0.0000    |
| 8008.3238              | 6842.8642   | 305.3703   | -1165.4595  | 6903.0145 |
| 309.1789               | -86.4641    | -86.7969   | 680285.8938 | -13.4361  |
| -13.4168               |             |            |             |           |
| [3315]ENERGY: 11710000 | 3322.9568   | 5348.7327  | 5775.1612   |           |
| 325.5304               | -14283.6567 | -1842.3799 | 0.0000      | 0.0000    |
| 8189.5700              | 6835.9145   | 312.2815   | -1353.6555  | 6902.3035 |
| 308.9140               | -4.6967     | -47.1018   | 680285.8938 | -18.0681  |
| -18.0672               |             |            |             |           |
| [3351]ENERGY: 11720000 | 3318.4892   | 5451.1597  | 5673.4163   |           |

## Supplementary Text 6

|                        |             |            |             |           |
|------------------------|-------------|------------|-------------|-----------|
| 321.9012               | -14315.7748 | -1777.4360 | 0.0000      | 0.0000    |
| 8166.5932              | 6838.3489   | 311.4054   | -1328.2444  | 6902.8745 |
| 309.0104               | -98.1401    | -46.6930   | 680285.8938 | -14.1375  |
| -14.1415               |             |            |             |           |
| [3401]ENERGY: 11730000 | 3358.8546   | 5422.1488  | 5694.9437   |           |
| 331.1809               | -14388.4851 | -1719.8203 | 0.0000      | 0.0000    |
| 8139.0752              | 6837.8978   | 310.3561   | -1301.1774  | 6903.6734 |
| 309.1415               | -87.8382    | -19.2566   | 680285.8938 | -14.3349  |
| -14.3129               |             |            |             |           |
| [3437]ENERGY: 11740000 | 3297.6257   | 5542.1901  | 5684.7962   |           |
| 334.3075               | -14355.0725 | -1735.2885 | 0.0000      | 0.0000    |
| 8071.3368              | 6839.8954   | 307.7731   | -1231.4415  | 6902.8920 |
| 309.2917               | 15.6979     | -40.7188   | 680285.8938 | -14.6001  |
| -14.6367               |             |            |             |           |
| [3487]ENERGY: 11750000 | 3366.7587   | 5391.8059  | 5750.2958   |           |
| 317.4947               | -14266.8581 | -1805.4817 | 0.0000      | 0.0000    |
| 8083.1196              | 6837.1349   | 308.2224   | -1245.9847  | 6902.8400 |
| 309.0994               | -26.2906    | -85.6148   | 680285.8938 | -17.1737  |
| -17.1615               |             |            |             |           |
| [3523]ENERGY: 11760000 | 3349.6478   | 5422.1140  | 5797.2616   |           |
| 350.5034               | -14375.1600 | -1799.3130 | 0.0000      | 0.0000    |
| 8092.6799              | 6837.7338   | 308.5869   | -1254.9461  | 6904.1727 |
| 309.1303               | -7.0967     | -65.2261   | 680285.8938 | -13.9022  |
| -13.9036               |             |            |             |           |
| [3573]ENERGY: 11770000 | 3353.5356   | 5405.8226  | 5717.8957   |           |
| 335.7050               | -14362.2689 | -1723.3960 | 0.0000      | 0.0000    |
| 8111.6389              | 6838.9329   | 309.3099   | -1272.7060  | 6903.4708 |
| 309.0199               | -2.9744     | -70.0344   | 680285.8938 | -14.8461  |
| -14.8312               |             |            |             |           |
| [3609]ENERGY: 11780000 | 3379.2284   | 5493.5316  | 5735.6027   |           |
| 337.9179               | -14383.4266 | -1739.8439 | 0.0000      | 0.0000    |
| 8017.3775              | 6840.3875   | 305.7155   | -1176.9900  | 6903.8314 |
| 309.0300               | -42.5205    | 13.9992    | 680285.8938 | -18.4936  |
| -18.4875               |             |            |             |           |
| [3659]ENERGY: 11790000 | 3351.9302   | 5340.0380  | 5701.1695   |           |
| 337.0987               | -14258.9268 | -1775.8693 | 0.0000      | 0.0000    |
| 8141.5735              | 6837.0139   | 310.4513   | -1304.5596  | 6904.1114 |
| 309.0250               | -33.7155    | -20.4908   | 680285.8938 | -17.5466  |
| -17.5528               |             |            |             |           |
| [3698]ENERGY: 11800000 | 3411.7070   | 5473.0879  | 5714.1749   |           |
| 323.5368               | -14332.0283 | -1783.5368 | 0.0000      | 0.0000    |
| 8034.3730              | 6841.3145   | 306.3636   | -1193.0585  | 6905.0550 |
| 309.2111               | -92.1991    | -41.1388   | 680285.8938 | -19.3576  |
| -19.3588               |             |            |             |           |
| [3748]ENERGY: 11810000 | 3374.5113   | 5419.2321  | 5676.6063   |           |
| 350.2531               | -14339.2024 | -1824.0293 | 0.0000      | 0.0000    |
| 8178.7819              | 6836.1530   | 311.8701   | -1342.6289  | 6905.1241 |
| 309.3706               | 25.9860     | -24.5022   | 680285.8938 | -19.0853  |
| -19.0895               |             |            |             |           |
| [3784]ENERGY: 11820000 | 3354.0367   | 5453.7420  | 5755.6581   |           |
| 339.6244               | -14292.6734 | -1777.5686 | 0.0000      | 0.0000    |
| 8008.6615              | 6841.4807   | 305.3832   | -1167.1808  | 6904.3698 |
| 309.3354               | -24.3355    | -4.0933    | 680285.8938 | -16.4086  |
| -16.4099               |             |            |             |           |

## Supplementary Text 6

|                        |             |            |             |           |
|------------------------|-------------|------------|-------------|-----------|
| [3834]ENERGY: 11830000 | 3303.1011   | 5593.5444  | 5793.5313   |           |
| 354.4581               | -14448.3996 | -1757.6221 | 0.0000      | 0.0000    |
| 8001.8865              | 6840.4997   | 305.1248   | -1161.3868  | 6904.6185 |
| 309.3110               | -98.2787    | -86.5455   | 680285.8938 | -21.2466  |
| -21.2436               |             |            |             |           |
| [3870]ENERGY: 11840000 | 3362.6322   | 5354.5350  | 5716.4616   |           |
| 319.5507               | -14305.6826 | -1793.8629 | 0.0000      | 0.0000    |
| 8181.9856              | 6835.6195   | 311.9923   | -1346.3660  | 6904.7475 |
| 309.3243               | 144.2748    | 111.1070   | 680285.8938 | -16.0850  |
| -16.0934               |             |            |             |           |
| [3920]ENERGY: 11850000 | 3334.7700   | 5435.3310  | 5703.5035   |           |
| 339.6956               | -14370.4416 | -1655.4046 | 0.0000      | 0.0000    |
| 8054.4868              | 6841.9407   | 307.1306   | -1212.5461  | 6904.9732 |
| 309.3527               | 88.3176     | 70.5728    | 680285.8938 | -13.9453  |
| -13.9487               |             |            |             |           |
| [3956]ENERGY: 11860000 | 3405.7675   | 5525.8396  | 5675.3368   |           |
| 353.8199               | -14408.7728 | -1748.9679 | 0.0000      | 0.0000    |
| 8041.5182              | 6844.5413   | 306.6361   | -1196.9769  | 6907.5108 |
| 309.3976               | -28.5128    | 1.6186     | 680285.8938 | -20.4408  |
| -20.4478               |             |            |             |           |
| [4006]ENERGY: 11870000 | 3370.9550   | 5500.3108  | 5729.7741   |           |
| 337.2974               | -14448.2199 | -1805.8793 | 0.0000      | 0.0000    |
| 8157.7536              | 6841.9916   | 311.0683   | -1315.7620  | 6907.7445 |
| 309.4043               | 77.7777     | 62.9413    | 680285.8938 | -14.4257  |
| -14.4038               |             |            |             |           |
| [4042]ENERGY: 11880000 | 3386.8073   | 5434.6625  | 5746.5453   |           |
| 365.0217               | -14259.1925 | -1847.3952 | 0.0000      | 0.0000    |
| 8020.3769              | 6846.8260   | 305.8299   | -1173.5509  | 6908.7722 |
| 309.3508               | 5.9343      | -55.7346   | 680285.8938 | -15.7053  |
| -15.7039               |             |            |             |           |
| [4092]ENERGY: 11890000 | 3297.0491   | 5436.5617  | 5744.5426   |           |
| 344.9426               | -14291.4710 | -1804.1979 | 0.0000      | 0.0000    |
| 8118.0105              | 6845.4376   | 309.5528   | -1272.5729  | 6908.4712 |
| 309.4428               | 29.8691     | 95.3117    | 680285.8938 | -15.3112  |
| -15.3088               |             |            |             |           |
| [4131]ENERGY: 11900000 | 3361.2123   | 5417.8572  | 5675.4880   |           |
| 334.4200               | -14322.5939 | -1750.2600 | 0.0000      | 0.0000    |
| 8129.1751              | 6845.2986   | 309.9786   | -1283.8765  | 6908.7754 |
| 309.7161               | 120.2599    | 144.5519   | 680285.8938 | -14.7821  |
| -14.8031               |             |            |             |           |
| [4181]ENERGY: 11910000 | 3355.6982   | 5446.8918  | 5738.5125   |           |
| 334.4240               | -14262.8649 | -1819.5463 | 0.0000      | 0.0000    |
| 8050.0088              | 6843.1242   | 306.9598   | -1206.8847  | 6908.8497 |
| 309.4343               | -28.8875    | -53.0924   | 680285.8938 | -17.6114  |
| -17.6042               |             |            |             |           |
| [4217]ENERGY: 11920000 | 3301.4237   | 5477.3840  | 5772.5980   |           |
| 372.5179               | -14368.4877 | -1804.5220 | 0.0000      | 0.0000    |
| 8095.5441              | 6846.4579   | 308.6961   | -1249.0862  | 6910.2036 |
| 309.5388               | 177.0990    | 70.5829    | 680285.8938 | -14.0219  |
| -14.0194               |             |            |             |           |
| [4267]ENERGY: 11930000 | 3372.0528   | 5517.0385  | 5707.2740   |           |
| 328.1649               | -14371.7418 | -1827.9579 | 0.0000      | 0.0000    |
| 8116.5628              | 6841.3933   | 309.4976   | -1275.1695  | 6910.3282 |
| 309.6226               | -16.8542    | 2.8786     | 680285.8938 | -15.9396  |

Supplementary Text 6

-15.9373  
 [4303]ENERGY: 11940000      3400.5542      5473.6944      5695.1403  
 345.4467      -14347.9981      -1748.5758      0.0000      0.0000  
 8025.8395      6844.1011      306.0382      -1181.7384      6908.7135  
 309.4819      -85.3696      -105.3194      680285.8938      -16.3208  
 -16.3229  
 [4353]ENERGY: 11950000      3297.1498      5419.7762      5744.7912  
 323.5402      -14239.4150      -1820.7773      0.0000      0.0000  
 8120.7350      6845.8001      309.6567      -1274.9349      6909.9061  
 309.6078      -23.2271      -75.6071      680285.8938      -18.5601  
 -18.5659  
 [4389]ENERGY: 11960000      3349.9474      5373.1703      5737.8897  
 336.9590      -14409.0686      -1672.6157      0.0000      0.0000  
 8126.2386      6842.5207      309.8666      -1283.7180      6908.1404  
 309.3885      28.8626      51.8206      680285.8938      -17.4524  
 -17.4373  
 [4439]ENERGY: 11970000      3304.5959      5489.6815      5724.7753  
 354.2372      -14293.3307      -1786.4196      0.0000      0.0000  
 8051.2445      6844.7842      307.0069      -1206.4603      6909.4245  
 309.3876      73.1521      63.0781      680285.8938      -14.4326  
 -14.4630  
 [4475]ENERGY: 11980000      3334.7327      5571.6895      5712.1921  
 334.9189      -14413.1839      -1792.3640      0.0000      0.0000  
 8094.5426      6842.5278      308.6580      -1252.0147      6909.9594  
 309.5215      53.8105      42.9784      680285.8938      -18.9611  
 -18.9404  
 [4525]ENERGY: 11990000      3341.8564      5486.5930      5685.4665  
 332.1888      -14339.8614      -1797.6855      0.0000      0.0000  
 8135.4568      6844.0146      310.2181      -1291.4422      6909.4457  
 309.5158      -163.6281      -99.5159      680285.8938      -19.3488  
 -19.3500  
 [4564]ENERGY: 12000000      3318.0706      5514.4437      5708.1136  
 359.9336      -14393.2433      -1831.3339      0.0000      0.0000  
 8167.2869      6843.2713      311.4318      -1324.0156      6910.5170  
 309.4817      123.6842      69.7441      680285.8938      -16.8423  
 -16.8381  
 [4614]ENERGY: 12010000      3326.8808      5503.3667      5718.8047  
 330.3234      -14328.9048      -1773.6969      0.0000      0.0000  
 8068.1959      6844.9698      307.6533      -1223.2260      6910.2338  
 309.4493      -86.1640      -114.3784      680285.8938      -20.2613  
 -20.2586  
 [4650]ENERGY: 12020000      3305.2793      5378.9032      5735.4983  
 329.0357      -14322.4212      -1763.6818      0.0000      0.0000  
 8180.5137      6843.1273      311.9362      -1337.3864      6909.2318  
 309.3564      202.1434      216.6141      680285.8938      -15.0011  
 -15.0165  
 [4700]ENERGY: 12030000      3381.6890      5525.0166      5672.9865  
 334.7290      -14364.3543      -1832.5287      0.0000      0.0000  
 8127.6437      6845.1819      309.9202      -1282.4618      6909.3656  
 309.3475      -58.2674      -52.3449      680285.8938      -18.9090  
 -18.8908  
 [4736]ENERGY: 12040000      3309.9076      5457.7060      5733.0324  
 327.5636      -14390.5827      -1748.1073      0.0000      0.0000  
 8151.2327      6840.7524      310.8196      -1310.4804      6909.3542

## Supplementary Text 6

|                        |             |            |             |           |
|------------------------|-------------|------------|-------------|-----------|
| 309.4675               | 158.8914    | 96.6384    | 680285.8938 | -17.2092  |
| -17.2160               |             |            |             |           |
| [4786]ENERGY: 12050000 | 3221.1939   | 5431.1906  | 5753.0276   |           |
| 351.6786               | -14288.0266 | -1746.2805 | 0.0000      | 0.0000    |
| 8120.4780              | 6843.2617   | 309.6469   | -1277.2163  | 6908.5237 |
| 309.5003               | 90.4242     | 5.2994     | 680285.8938 | -15.4619  |
| -15.4720               |             |            |             |           |
| [4822]ENERGY: 12060000 | 3262.5165   | 5454.8677  | 5708.5025   |           |
| 337.9167               | -14253.9116 | -1775.7187 | 0.0000      | 0.0000    |
| 8110.0542              | 6844.2273   | 309.2494   | -1265.8269  | 6909.6465 |
| 309.4860               | -24.0462    | -22.2526   | 680285.8938 | -17.7365  |
| -17.7174               |             |            |             |           |
| [4872]ENERGY: 12070000 | 3342.0318   | 5422.8498  | 5702.7797   |           |
| 347.6042               | -14343.0436 | -1773.3794 | 0.0000      | 0.0000    |
| 8143.4428              | 6842.2853   | 310.5226   | -1301.1575  | 6908.0334 |
| 309.4276               | 119.9590    | 44.9735    | 680285.8938 | -20.6249  |
| -20.6311               |             |            |             |           |
| [4908]ENERGY: 12080000 | 3219.7874   | 5403.4827  | 5752.3472   |           |
| 348.9074               | -14253.9958 | -1824.6121 | 0.0000      | 0.0000    |
| 8199.4198              | 6845.3367   | 312.6571   | -1354.0831  | 6910.5604 |
| 309.6186               | 53.5005     | -14.2510   | 680285.8938 | -20.2604  |
| -20.2831               |             |            |             |           |
| [4958]ENERGY: 12090000 | 3248.1054   | 5374.5677  | 5738.8187   |           |
| 360.0069               | -14329.4221 | -1723.3960 | 0.0000      | 0.0000    |
| 8177.6626              | 6846.3432   | 311.8275   | -1331.3194  | 6910.8869 |
| 309.5391               | 129.9173    | 26.8464    | 680285.8938 | -21.6461  |
| -21.6401               |             |            |             |           |
| [4997]ENERGY: 12100000 | 3294.7826   | 5432.1879  | 5726.6140   |           |
| 347.1189               | -14316.4178 | -1771.7762 | 0.0000      | 0.0000    |
| 8129.1379              | 6841.6473   | 309.9771   | -1287.4906  | 6909.5567 |
| 309.5839               | 82.6477     | 75.9789    | 680285.8938 | -13.6471  |
| -13.6519               |             |            |             |           |
| [5047]ENERGY: 12110000 | 3300.2389   | 5496.2324  | 5688.2529   |           |
| 342.6830               | -14360.7318 | -1766.0333 | 0.0000      | 0.0000    |
| 8145.0642              | 6845.7063   | 310.5844   | -1299.3579  | 6909.3375 |
| 309.4537               | 32.1457     | -43.9921   | 680285.8938 | -16.6268  |
| -16.6172               |             |            |             |           |
| [5083]ENERGY: 12120000 | 3335.6681   | 5393.2014  | 5735.2074   |           |
| 334.0708               | -14294.4836 | -1841.0808 | 0.0000      | 0.0000    |
| 8181.3443              | 6843.9276   | 311.9678   | -1337.4166  | 6909.6479 |
| 309.5130               | -52.8807    | -44.1807   | 680285.8938 | -16.4415  |
| -16.4454               |             |            |             |           |
| [5133]ENERGY: 12130000 | 3309.8809   | 5392.6134  | 5734.8250   |           |
| 333.7259               | -14253.7857 | -1823.8941 | 0.0000      | 0.0000    |
| 8149.7902              | 6843.1557   | 310.7646   | -1306.6345  | 6908.4285 |
| 309.4526               | -43.0068    | -54.5777   | 680285.8938 | -18.8315  |
| -18.8150               |             |            |             |           |
| [5169]ENERGY: 12140000 | 3237.7724   | 5406.7948  | 5696.7940   |           |
| 329.4611               | -14229.2013 | -1775.0029 | 0.0000      | 0.0000    |
| 8171.2330              | 6837.8510   | 311.5823   | -1333.3820  | 6907.5029 |
| 309.3073               | 53.4209     | 42.6270    | 680285.8938 | -20.0897  |
| -20.1118               |             |            |             |           |
| [5219]ENERGY: 12150000 | 3382.4268   | 5401.6015  | 5720.0051   |           |
| 354.4503               | -14349.5025 | -1806.1779 | 0.0000      | 0.0000    |



## Supplementary Text 6

|                        |             |            |             |           |
|------------------------|-------------|------------|-------------|-----------|
| 8141.0016              | 6843.8049   | 310.4295   | -1297.1968  | 6907.4268 |
| 309.2508               | -211.7923   | -183.8701  | 680285.8938 | -16.0612  |
| -16.0244               |             |            |             |           |
| [5255]ENERGY: 12160000 | 3317.8082   | 5479.2670  | 5806.5812   |           |
| 334.7270               | -14330.6817 | -1881.6948 | 0.0000      | 0.0000    |
| 8115.6882              | 6841.6951   | 309.4643   | -1273.9931  | 6908.1771 |
| 309.2739               | 40.8301     | -27.1826   | 680285.8938 | -16.2503  |
| -16.2847               |             |            |             |           |
| [5305]ENERGY: 12170000 | 3323.5728   | 5491.2014  | 5660.3002   |           |
| 332.1144               | -14292.7825 | -1718.5357 | 0.0000      | 0.0000    |
| 8049.3390              | 6845.2097   | 306.9343   | -1204.1293  | 6908.0199 |
| 309.2971               | 20.6419     | 28.4115    | 680285.8938 | -15.7292  |
| -15.7050               |             |            |             |           |
| [5341]ENERGY: 12180000 | 3299.1266   | 5537.1396  | 5684.2399   |           |
| 326.5353               | -14230.6025 | -1853.3712 | 0.0000      | 0.0000    |
| 8081.0485              | 6844.1163   | 308.1434   | -1236.9322  | 6910.0923 |
| 309.2923               | 108.8915    | -22.6281   | 680285.8938 | -13.6336  |
| -13.6523               |             |            |             |           |
| [5391]ENERGY: 12190000 | 3324.1521   | 5440.3501  | 5741.7621   |           |
| 331.7611               | -14330.3999 | -1841.7638 | 0.0000      | 0.0000    |
| 8176.9257              | 6842.7874   | 311.7994   | -1334.1383  | 6908.5165 |
| 309.4928               | -51.4788    | -38.7426   | 680285.8938 | -17.7166  |
| -17.6993               |             |            |             |           |
| [5430]ENERGY: 12200000 | 3347.5275   | 5452.3682  | 5716.6100   |           |
| 329.1491               | -14392.4058 | -1753.0878 | 0.0000      | 0.0000    |
| 8142.5371              | 6842.6981   | 310.4881   | -1299.8389  | 6908.8673 |
| 309.4048               | -46.6682    | -28.2485   | 680285.8938 | -22.2188  |
| -22.2119               |             |            |             |           |
| [5480]ENERGY: 12210000 | 3343.1742   | 5465.5616  | 5740.3636   |           |
| 332.4863               | -14305.3378 | -1787.8709 | 0.0000      | 0.0000    |
| 8058.7248              | 6847.1019   | 307.2922   | -1211.6229  | 6909.6431 |
| 309.3748               | 54.0580     | 7.1912     | 680285.8938 | -16.9600  |
| -16.9684               |             |            |             |           |
| [5516]ENERGY: 12220000 | 3300.0764   | 5513.1925  | 5698.1600   |           |
| 339.2294               | -14295.9496 | -1830.9759 | 0.0000      | 0.0000    |
| 8118.1141              | 6841.8469   | 309.5568   | -1276.2673  | 6907.8423 |
| 309.4596               | -158.6481   | -69.7525   | 680285.8938 | -14.4860  |
| -14.4984               |             |            |             |           |
| [5566]ENERGY: 12230000 | 3309.7631   | 5398.2353  | 5713.2130   |           |
| 347.1923               | -14272.7632 | -1840.1231 | 0.0000      | 0.0000    |
| 8188.1653              | 6843.6828   | 312.2279   | -1344.4825  | 6909.1530 |
| 309.4132               | -19.3962    | 21.0394    | 680285.8938 | -20.2021  |
| -20.2016               |             |            |             |           |
| [5602]ENERGY: 12240000 | 3383.8213   | 5505.7614  | 5681.9785   |           |
| 344.7137               | -14272.6906 | -1840.1894 | 0.0000      | 0.0000    |
| 8043.8002              | 6847.1951   | 306.7231   | -1196.6051  | 6910.6845 |
| 309.5914               | -108.7211   | -14.5259   | 680285.8938 | -17.1084  |
| -17.1108               |             |            |             |           |
| [5652]ENERGY: 12250000 | 3390.6182   | 5356.8570  | 5692.2061   |           |
| 368.1559               | -14244.9147 | -1836.7617 | 0.0000      | 0.0000    |
| 8116.7457              | 6842.9065   | 309.5046   | -1273.8392  | 6908.9135 |
| 309.7540               | -143.8090   | -42.4444   | 680285.8938 | -16.4879  |
| -16.4682               |             |            |             |           |
| [5688]ENERGY: 12260000 | 3342.2794   | 5478.7411  | 5702.7369   |           |

## Supplementary Text 6

|                        |             |            |             |           |
|------------------------|-------------|------------|-------------|-----------|
| 369.0840               | -14310.8524 | -1847.8090 | 0.0000      | 0.0000    |
| 8108.0660              | 6842.2461   | 309.1736   | -1265.8200  | 6910.6933 |
| 309.6129               | -3.7048     | -63.5042   | 680285.8938 | -15.2817  |
| -15.3090               |             |            |             |           |
| [5738]ENERGY: 12270000 | 3347.9813   | 5385.3136  | 5694.0980   |           |
| 365.1945               | -14282.4539 | -1812.3544 | 0.0000      | 0.0000    |
| 8143.9739              | 6841.7529   | 310.5429   | -1302.2209  | 6910.1061 |
| 309.6163               | 30.2488     | 68.9242    | 680285.8938 | -19.7128  |
| -19.6962               |             |            |             |           |
| [5774]ENERGY: 12280000 | 3274.0083   | 5468.2323  | 5758.6916   |           |
| 365.1315               | -14389.8587 | -1755.9286 | 0.0000      | 0.0000    |
| 8125.5637              | 6845.8401   | 309.8408   | -1279.7236  | 6910.6846 |
| 309.7444               | 183.7725    | 177.7394   | 680285.8938 | -11.1672  |
| -11.1674               |             |            |             |           |
| [5824]ENERGY: 12290000 | 3272.7075   | 5480.3145  | 5709.5642   |           |
| 328.1855               | -14417.4818 | -1695.4570 | 0.0000      | 0.0000    |
| 8164.3001              | 6842.1329   | 311.3179   | -1322.1672  | 6909.4777 |
| 309.5005               | 106.9175    | 36.5098    | 680285.8938 | -15.4596  |
| -15.4495               |             |            |             |           |
| [5863]ENERGY: 12300000 | 3337.3220   | 5497.1610  | 5694.5628   |           |
| 335.6946               | -14339.0059 | -1800.0297 | 0.0000      | 0.0000    |
| 8117.1013              | 6842.8060   | 309.5182   | -1274.2953  | 6910.8498 |
| 309.4721               | -91.6045    | -167.7141  | 680285.8938 | -16.9343  |
| -16.9407               |             |            |             |           |
| [5913]ENERGY: 12310000 | 3353.9344   | 5429.8048  | 5712.9498   |           |
| 347.3253               | -14326.4653 | -1759.0397 | 0.0000      | 0.0000    |
| 8085.1215              | 6843.6307   | 308.2987   | -1241.4908  | 6909.6337 |
| 309.4507               | -45.9523    | 6.4571     | 680285.8938 | -15.8529  |
| -15.8507               |             |            |             |           |
| [5949]ENERGY: 12320000 | 3291.2245   | 5597.7152  | 5727.2830   |           |
| 362.5486               | -14336.2349 | -1841.0841 | 0.0000      | 0.0000    |
| 8045.4227              | 6846.8750   | 306.7849   | -1198.5477  | 6911.1128 |
| 309.5591               | 88.5593     | 45.1876    | 680285.8938 | -12.7549  |
| -12.7646               |             |            |             |           |
| [5999]ENERGY: 12330000 | 3349.9009   | 5443.0560  | 5655.6720   |           |
| 344.1989               | -14341.0497 | -1769.2432 | 0.0000      | 0.0000    |
| 8159.4751              | 6842.0100   | 311.1339   | -1317.4652  | 6910.2345 |
| 309.5589               | 23.5861     | -12.9257   | 680285.8938 | -21.7384  |
| -21.7514               |             |            |             |           |
| [6035]ENERGY: 12340000 | 3253.8620   | 5392.3367  | 5723.1086   |           |
| 322.1370               | -14320.7592 | -1719.8000 | 0.0000      | 0.0000    |
| 8194.2851              | 6845.1701   | 312.4613   | -1349.1150  | 6911.9930 |
| 309.6057               | 89.7908     | 94.9753    | 680285.8938 | -14.4626  |
| -14.4499               |             |            |             |           |
| [6085]ENERGY: 12350000 | 3423.6437   | 5480.8751  | 5715.1713   |           |
| 330.8764               | -14268.1907 | -1857.2678 | 0.0000      | 0.0000    |
| 8023.2305              | 6848.3384   | 305.9387   | -1174.8921  | 6910.8205 |
| 309.5910               | -94.6875    | -136.2224  | 680285.8938 | -20.0178  |
| -20.0243               |             |            |             |           |
| [6121]ENERGY: 12360000 | 3357.2329   | 5495.1117  | 5719.2316   |           |
| 335.7279               | -14342.3834 | -1738.5825 | 0.0000      | 0.0000    |
| 8021.0818              | 6847.4200   | 305.8568   | -1173.6618  | 6910.9039 |
| 309.6486               | -98.7172    | -43.0170   | 680285.8938 | -17.5229  |
| -17.5134               |             |            |             |           |

## Supplementary Text 6

|                        |             |            |             |           |
|------------------------|-------------|------------|-------------|-----------|
| [6171]ENERGY: 12370000 | 3261.9700   | 5545.7114  | 5717.7494   |           |
| 314.1256               | -14255.5171 | -1798.9640 | 0.0000      | 0.0000    |
| 8061.1358              | 6846.2111   | 307.3841   | -1214.9247  | 6910.0710 |
| 309.5629               | -52.9900    | 2.5240     | 680285.8938 | -19.2198  |
| -19.2160               |             |            |             |           |
| [6207]ENERGY: 12380000 | 3418.4596   | 5485.3822  | 5762.5513   |           |
| 334.5191               | -14406.7982 | -1786.2188 | 0.0000      | 0.0000    |
| 8039.8585              | 6847.7536   | 306.5728   | -1192.1049  | 6911.2446 |
| 309.6604               | 143.2966    | 52.5452    | 680285.8938 | -17.5265  |
| -17.5337               |             |            |             |           |
| [6257]ENERGY: 12390000 | 3376.5454   | 5566.4032  | 5714.1743   |           |
| 317.1384               | -14324.9017 | -1873.2445 | 0.0000      | 0.0000    |
| 8069.0213              | 6845.1364   | 307.6848   | -1223.8849  | 6910.8437 |
| 309.4713               | -116.5938   | -111.8520  | 680285.8938 | -20.1780  |
| -20.1659               |             |            |             |           |
| [6296]ENERGY: 12400000 | 3431.5477   | 5420.7429  | 5694.8199   |           |
| 349.0892               | -14391.2467 | -1733.4933 | 0.0000      | 0.0000    |
| 8078.5776              | 6850.0374   | 308.0492   | -1228.5403  | 6910.9678 |
| 309.6661               | -66.7798    | -87.9362   | 680285.8938 | -14.7619  |
| -14.7870               |             |            |             |           |
| [6346]ENERGY: 12410000 | 3398.6076   | 5418.2508  | 5711.8239   |           |
| 351.4480               | -14352.7497 | -1800.6706 | 0.0000      | 0.0000    |
| 8118.8384              | 6845.5484   | 309.5844   | -1273.2900  | 6912.0718 |
| 309.6211               | -54.6007    | -35.1520   | 680285.8938 | -14.7760  |
| -14.7525               |             |            |             |           |
| [6382]ENERGY: 12420000 | 3327.8817   | 5428.9785  | 5746.8382   |           |
| 350.8030               | -14238.1150 | -1846.7734 | 0.0000      | 0.0000    |
| 8079.4201              | 6849.0331   | 308.0813   | -1230.3870  | 6911.4322 |
| 309.7005               | 58.0485     | -9.8094    | 680285.8938 | -20.8034  |
| -20.8027               |             |            |             |           |
| [6432]ENERGY: 12430000 | 3311.6184   | 5434.7617  | 5706.3025   |           |
| 331.6743               | -14317.0554 | -1759.8212 | 0.0000      | 0.0000    |
| 8141.3460              | 6848.8262   | 310.4427   | -1292.5198  | 6911.2209 |
| 309.6818               | 61.2421     | 89.8780    | 680285.8938 | -16.6037  |
| -16.5906               |             |            |             |           |
| [6468]ENERGY: 12440000 | 3354.4174   | 5419.1709  | 5687.2252   |           |
| 334.3080               | -14239.3227 | -1838.0175 | 0.0000      | 0.0000    |
| 8129.1186              | 6846.8999   | 309.9764   | -1282.2187  | 6911.9390 |
| 309.5137               | 60.2495     | -25.5423   | 680285.8938 | -18.2095  |
| -18.2378               |             |            |             |           |
| [6518]ENERGY: 12450000 | 3348.5629   | 5384.5383  | 5676.6055   |           |
| 339.2421               | -14278.5926 | -1836.6679 | 0.0000      | 0.0000    |
| 8208.1604              | 6841.8487   | 312.9904   | -1366.3117  | 6911.0109 |
| 309.4181               | -106.1513   | -18.7005   | 680285.8938 | -19.2875  |
| -19.2844               |             |            |             |           |
| [6554]ENERGY: 12460000 | 3353.3217   | 5539.7289  | 5642.6667   |           |
| 339.8894               | -14263.3678 | -1813.3259 | 0.0000      | 0.0000    |
| 8049.6505              | 6848.5634   | 306.9462   | -1201.0870  | 6911.2008 |
| 309.4532               | -220.4924   | -189.5793  | 680285.8938 | -18.9749  |
| -18.9803               |             |            |             |           |
| [6604]ENERGY: 12470000 | 3292.4204   | 5568.7590  | 5721.3690   |           |
| 338.0451               | -14259.9085 | -1883.6193 | 0.0000      | 0.0000    |
| 8068.1546              | 6845.2203   | 307.6517   | -1222.9343  | 6910.8073 |
| 309.3949               | -150.9841   | -48.7131   | 680285.8938 | -17.5793  |

## Supplementary Text 6

-17.5516  
[6640]ENERGY: 12480000      3343.1934      5482.4005      5715.9175  
340.0963      -14320.1317      -1798.9484      0.0000      0.0000  
8081.6806      6844.2083      308.1675      -1237.4724      6911.8479  
309.5562      -36.6729      -92.8908      680285.8938      -18.5335  
-18.5516  
[6690]ENERGY: 12490000      3307.2788      5467.7445      5733.7247  
356.2859      -14292.3705      -1854.6699      0.0000      0.0000  
8126.3563      6844.3498      309.8711      -1282.0065      6911.1645  
309.4795      -2.3085      9.4116      680285.8938      -18.4321  
-18.4363  
[6729]ENERGY: 12500000      3244.6607      5518.6724      5661.5073  
333.0359      -14281.8036      -1767.6509      0.0000      0.0000  
8136.2387      6844.6605      310.2479      -1291.5783      6911.2034  
309.4909      101.3767      69.0288      680285.8938      -19.7847  
-19.7789  
[6779]ENERGY: 12510000      3359.2817      5433.6191      5714.2362  
332.1984      -14336.8680      -1804.1898      0.0000      0.0000  
8149.2860      6847.5637      310.7454      -1301.7223      6911.5839  
309.5034      8.1635      -42.1050      680285.8938      -17.1606  
-17.1680  
[6815]ENERGY: 12520000      3380.9030      5368.8811      5741.0866  
340.4657      -14211.8948      -1844.4217      0.0000      0.0000  
8075.4292      6850.4491      307.9291      -1224.9801      6912.9793  
309.4338      -4.7460      -1.6593      680285.8938      -21.0627  
-21.0431  
[6865]ENERGY: 12530000      3286.6096      5483.4178      5710.0819  
343.3968      -14360.2706      -1766.0638      0.0000      0.0000  
8148.2441      6845.4157      310.7057      -1302.8283      6912.3412  
309.4927      -60.3203      -121.8089      680285.8938      -15.4919  
-15.5003  
[6901]ENERGY: 12540000      3433.5425      5515.2927      5710.0850  
353.2384      -14393.7490      -1818.7265      0.0000      0.0000  
8048.0345      6847.7178      306.8845      -1200.3167      6914.7486  
309.5080      -78.6810      -174.1033      680285.8938      -21.0458  
-21.0486  
[6951]ENERGY: 12550000      3332.2650      5562.5976      5684.8358  
321.1572      -14215.5615      -1820.5537      0.0000      0.0000  
7986.1171      6850.8574      304.5235      -1135.2597      6914.5723  
309.3329      -3.5124      -25.3954      680285.8938      -17.3205  
-17.3178  
[6987]ENERGY: 12560000      3312.7648      5426.5686      5708.0018  
309.5769      -14326.1182      -1804.6071      0.0000      0.0000  
8220.5763      6846.7632      313.4638      -1373.8131      6913.3653  
309.5758      26.3406      -0.6180      680285.8938      -21.0449  
-21.0349  
[7037]ENERGY: 12570000      3396.7192      5418.5318      5737.1389  
368.4480      -14335.7642      -1829.0341      0.0000      0.0000  
8092.3030      6848.3426      308.5726      -1243.9604      6914.7419  
309.3770      -46.2182      13.2556      680285.8938      -14.8676  
-14.8806  
[7073]ENERGY: 12580000      3289.1544      5586.8885      5674.7583  
358.0998      -14333.1868      -1858.8712      0.0000      0.0000  
8132.6938      6849.5367      310.1127      -1283.1571      6914.8245

## Supplementary Text 6

|                        |             |            |             |           |
|------------------------|-------------|------------|-------------|-----------|
| 309.4278               | -12.2351    | -53.7428   | 680285.8938 | -13.5991  |
| -13.6073               |             |            |             |           |
| [7123]ENERGY: 12590000 | 3285.0015   | 5595.0899  | 5701.9522   |           |
| 340.7627               | -14379.6716 | -1764.3447 | 0.0000      | 0.0000    |
| 8069.7932              | 6848.5831   | 307.7142   | -1221.2101  | 6915.3037 |
| 309.4220               | -4.1409     | -50.6076   | 680285.8938 | -17.6189  |
| -17.6228               |             |            |             |           |
| [7162]ENERGY: 12600000 | 3273.8934   | 5506.9534  | 5677.4099   |           |
| 335.4559               | -14256.4037 | -1811.9509 | 0.0000      | 0.0000    |
| 8121.2227              | 6846.5806   | 309.6753   | -1274.6421  | 6913.5212 |
| 309.4665               | -15.4725    | 3.7335     | 680285.8938 | -16.0465  |
| -16.0312               |             |            |             |           |
| [7212]ENERGY: 12610000 | 3330.7851   | 5347.7671  | 5757.4588   |           |
| 332.1967               | -14255.8527 | -1808.5058 | 0.0000      | 0.0000    |
| 8143.5824              | 6847.4316   | 310.5279   | -1296.1508  | 6913.0963 |
| 309.3027               | -100.2354   | -70.5307   | 680285.8938 | -13.9561  |
| -13.9682               |             |            |             |           |
| [7248]ENERGY: 12620000 | 3346.3110   | 5499.5174  | 5694.9090   |           |
| 327.5015               | -14268.2300 | -1857.1698 | 0.0000      | 0.0000    |
| 8106.4757              | 6849.3148   | 309.1130   | -1257.1609  | 6914.6809 |
| 309.6658               | -19.0844    | -47.1029   | 680285.8938 | -16.6949  |
| -16.6833               |             |            |             |           |
| [7298]ENERGY: 12630000 | 3416.5534   | 5409.2576  | 5710.9031   |           |
| 346.6051               | -14377.4379 | -1757.0877 | 0.0000      | 0.0000    |
| 8099.8197              | 6848.6133   | 308.8592   | -1251.2064  | 6915.1556 |
| 309.7308               | 111.5001    | 125.4453   | 680285.8938 | -18.2098  |
| -18.2082               |             |            |             |           |
| [7334]ENERGY: 12640000 | 3276.3454   | 5548.2570  | 5687.0917   |           |
| 369.2717               | -14299.3746 | -1697.6214 | 0.0000      | 0.0000    |
| 7967.7520              | 6851.7217   | 303.8232   | -1116.0303  | 6916.1372 |
| 309.5322               | 75.3710     | 102.9224   | 680285.8938 | -19.1219  |
| -19.1244               |             |            |             |           |
| [7384]ENERGY: 12650000 | 3373.2905   | 5493.6495  | 5696.8048   |           |
| 323.1169               | -14340.0175 | -1798.9124 | 0.0000      | 0.0000    |
| 8101.9657              | 6849.8975   | 308.9410   | -1252.0682  | 6916.3231 |
| 309.4630               | -44.4082    | -4.4544    | 680285.8938 | -17.0595  |
| -17.0743               |             |            |             |           |
| [7420]ENERGY: 12660000 | 3315.4048   | 5515.2407  | 5648.6379   |           |
| 351.8519               | -14259.1999 | -1825.2563 | 0.0000      | 0.0000    |
| 8105.2400              | 6851.9189   | 309.0659   | -1253.3211  | 6916.1650 |
| 309.4623               | 118.6814    | 52.5944    | 680285.8938 | -21.3098  |
| -21.3060               |             |            |             |           |
| [7470]ENERGY: 12670000 | 3316.6775   | 5500.5762  | 5701.8545   |           |
| 316.4298               | -14320.8228 | -1795.9483 | 0.0000      | 0.0000    |
| 8132.8607              | 6851.6275   | 310.1191   | -1281.2332  | 6916.4082 |
| 309.4779               | 102.2178    | 91.2459    | 680285.8938 | -14.4583  |
| -14.4593               |             |            |             |           |
| [7506]ENERGY: 12680000 | 3320.3651   | 5496.5589  | 5626.0986   |           |
| 353.8598               | -14380.9562 | -1788.0715 | 0.0000      | 0.0000    |
| 8219.9963              | 6847.8508   | 313.4417   | -1372.1454  | 6916.2195 |
| 309.5326               | 27.9310     | -11.3251   | 680285.8938 | -16.9412  |
| -16.9394               |             |            |             |           |
| [7556]ENERGY: 12690000 | 3356.6031   | 5460.5744  | 5725.0631   |           |
| 341.6059               | -14281.4142 | -1849.3219 | 0.0000      | 0.0000    |

## Supplementary Text 6

|                        |             |            |             |           |
|------------------------|-------------|------------|-------------|-----------|
| 8099.7733              | 6852.8838   | 308.8574   | -1246.8895  | 6916.4950 |
| 309.6696               | 62.7093     | 7.5136     | 680285.8938 | -19.1690  |
| -19.1687               |             |            |             |           |
| [7595]ENERGY: 12700000 | 3274.2006   | 5463.9939  | 5713.6970   |           |
| 362.5384               | -14339.2171 | -1798.2981 | 0.0000      | 0.0000    |
| 8172.2599              | 6849.1746   | 311.6214   | -1323.0853  | 6916.6696 |
| 309.6274               | -6.0130     | -127.5006  | 680285.8938 | -20.0951  |
| -20.0952               |             |            |             |           |
| [7645]ENERGY: 12710000 | 3276.2429   | 5589.6078  | 5684.5423   |           |
| 364.0823               | -14311.7289 | -1798.6280 | 0.0000      | 0.0000    |
| 8048.2414              | 6852.3597   | 306.8924   | -1195.8817  | 6918.1210 |
| 309.7687               | 50.2548     | 81.4010    | 680285.8938 | -15.3092  |
| -15.3101               |             |            |             |           |
| [7681]ENERGY: 12720000 | 3353.5888   | 5384.4876  | 5722.1976   |           |
| 353.7120               | -14336.6618 | -1778.8723 | 0.0000      | 0.0000    |
| 8153.9830              | 6852.4350   | 310.9245   | -1301.5480  | 6917.6965 |
| 309.8909               | 62.9203     | -3.4601    | 680285.8938 | -19.3873  |
| -19.3856               |             |            |             |           |
| [7731]ENERGY: 12730000 | 3381.6110   | 5391.6761  | 5685.9178   |           |
| 329.4871               | -14285.8594 | -1825.1070 | 0.0000      | 0.0000    |
| 8174.6987              | 6852.4242   | 311.7144   | -1322.2745  | 6916.9757 |
| 309.8706               | -90.3556    | -70.5621   | 680285.8938 | -15.4455  |
| -15.4367               |             |            |             |           |
| [7767]ENERGY: 12740000 | 3287.8157   | 5515.1602  | 5698.9728   |           |
| 336.7719               | -14299.4257 | -1837.4815 | 0.0000      | 0.0000    |
| 8150.3351              | 6852.1486   | 310.7854   | -1298.1865  | 6919.4419 |
| 309.8589               | -21.2470    | -39.2699   | 680285.8938 | -16.4738  |
| -16.4661               |             |            |             |           |
| [7817]ENERGY: 12750000 | 3347.2107   | 5530.5421  | 5681.5235   |           |
| 336.7100               | -14377.3063 | -1816.4127 | 0.0000      | 0.0000    |
| 8148.6239              | 6850.8913   | 310.7202   | -1297.7327  | 6919.3028 |
| 309.8068               | 204.6912    | 34.3314    | 680285.8938 | -14.5352  |
| -14.5681               |             |            |             |           |
| [7853]ENERGY: 12760000 | 3347.7621   | 5416.8437  | 5721.8488   |           |
| 333.8972               | -14319.4394 | -1774.7237 | 0.0000      | 0.0000    |
| 8128.4112              | 6854.5999   | 309.9494   | -1273.8113  | 6919.3208 |
| 309.8634               | 90.4874     | -1.8183    | 680285.8938 | -17.3562  |
| -17.3588               |             |            |             |           |
| [7903]ENERGY: 12770000 | 3293.5277   | 5465.0064  | 5711.0655   |           |
| 353.5193               | -14361.0225 | -1769.3061 | 0.0000      | 0.0000    |
| 8159.4096              | 6852.1998   | 311.1314   | -1307.2098  | 6918.4829 |
| 309.9727               | 123.3817    | 75.4089    | 680285.8938 | -20.6748  |
| -20.6508               |             |            |             |           |
| [7939]ENERGY: 12780000 | 3434.5977   | 5497.2519  | 5718.5663   |           |
| 325.8435               | -14335.4238 | -1865.2192 | 0.0000      | 0.0000    |
| 8079.4633              | 6855.0796   | 308.0830   | -1224.3837  | 6919.1139 |
| 310.1007               | -53.9964    | -82.1328   | 680285.8938 | -16.1368  |
| -16.1359               |             |            |             |           |
| [7989]ENERGY: 12790000 | 3416.3817   | 5467.6380  | 5683.6319   |           |
| 352.1500               | -14355.0809 | -1831.4517 | 0.0000      | 0.0000    |
| 8116.9797              | 6850.2487   | 309.5135   | -1266.7309  | 6918.7453 |
| 309.9689               | -169.5930   | -188.0869  | 680285.8938 | -19.0247  |
| -19.0140               |             |            |             |           |
| [8028]ENERGY: 12800000 | 3294.0776   | 5560.7422  | 5703.6214   |           |

## Supplementary Text 6

|                        |             |            |             |           |
|------------------------|-------------|------------|-------------|-----------|
| 354.9795               | -14300.4533 | -1864.2596 | 0.0000      | 0.0000    |
| 8108.4450              | 6857.1528   | 309.1881   | -1251.2923  | 6919.7544 |
| 310.1844               | 60.8601     | 10.4339    | 680285.8938 | -20.0510  |
| -20.0655               |             |            |             |           |
| [8078]ENERGY: 12810000 | 3276.9422   | 5501.7922  | 5717.2807   |           |
| 335.1017               | -14353.6938 | -1749.5161 | 0.0000      | 0.0000    |
| 8125.4494              | 6853.3562   | 309.8365   | -1272.0932  | 6919.4909 |
| 309.9096               | 84.5927     | 60.1220    | 680285.8938 | -15.5915  |
| -15.5863               |             |            |             |           |
| [8114]ENERGY: 12820000 | 3370.3200   | 5533.8519  | 5691.8114   |           |
| 348.6530               | -14372.2042 | -1774.4866 | 0.0000      | 0.0000    |
| 8058.5056              | 6856.4510   | 307.2838   | -1202.0546  | 6920.3674 |
| 309.8332               | -60.6265    | -69.1000   | 680285.8938 | -20.3181  |
| -20.3316               |             |            |             |           |
| [8164]ENERGY: 12830000 | 3430.5312   | 5443.9464  | 5665.6160   |           |
| 331.2254               | -14310.7442 | -1855.1034 | 0.0000      | 0.0000    |
| 8150.1401              | 6855.6114   | 310.7780   | -1294.5286  | 6920.3169 |
| 310.1081               | -146.2613   | -113.7324  | 680285.8938 | -18.9587  |
| -18.9454               |             |            |             |           |
| [8200]ENERGY: 12840000 | 3361.4448   | 5546.1247  | 5721.4025   |           |
| 360.5314               | -14329.0686 | -1812.5663 | 0.0000      | 0.0000    |
| 8012.4795              | 6860.3480   | 305.5288   | -1152.1316  | 6921.7897 |
| 310.1002               | -133.6447   | -78.0358   | 680285.8938 | -15.2218  |
| -15.2364               |             |            |             |           |
| [8250]ENERGY: 12850000 | 3334.4465   | 5430.2541  | 5723.3927   |           |
| 337.9390               | -14320.4176 | -1738.8687 | 0.0000      | 0.0000    |
| 8087.8812              | 6854.6273   | 308.4040   | -1233.2539  | 6920.6878 |
| 310.0314               | 131.9889    | 117.3725   | 680285.8938 | -22.3862  |
| -22.3676               |             |            |             |           |
| [8286]ENERGY: 12860000 | 3306.2620   | 5472.9597  | 5726.5089   |           |
| 367.7048               | -14285.1696 | -1829.9490 | 0.0000      | 0.0000    |
| 8098.0345              | 6856.3512   | 308.7911   | -1241.6833  | 6921.9931 |
| 310.0687               | 1.8318      | -127.6849  | 680285.8938 | -19.0991  |
| -19.1268               |             |            |             |           |
| [8336]ENERGY: 12870000 | 3266.1100   | 5636.8378  | 5704.2279   |           |
| 365.7937               | -14323.6057 | -1789.9060 | 0.0000      | 0.0000    |
| 8000.1979              | 6859.6555   | 305.0604   | -1140.5424  | 6921.8411 |
| 310.0536               | 70.9512     | 38.6460    | 680285.8938 | -21.3306  |
| -21.3019               |             |            |             |           |
| [8372]ENERGY: 12880000 | 3202.5256   | 5558.0782  | 5758.3482   |           |
| 344.1636               | -14283.1338 | -1851.8825 | 0.0000      | 0.0000    |
| 8130.6857              | 6858.7850   | 310.0362   | -1271.9007  | 6923.6803 |
| 309.9635               | 144.4548    | 48.0625    | 680285.8938 | -20.7731  |
| -20.7838               |             |            |             |           |
| [8422]ENERGY: 12890000 | 3361.7304   | 5495.6794  | 5733.2882   |           |
| 323.8947               | -14302.0202 | -1845.2822 | 0.0000      | 0.0000    |
| 8089.9682              | 6857.2586   | 308.4835   | -1232.7096  | 6923.4911 |
| 310.1339               | 22.9055     | -44.3185   | 680285.8938 | -19.2504  |
| -19.2494               |             |            |             |           |
| [8461]ENERGY: 12900000 | 3370.7625   | 5454.2445  | 5694.2938   |           |
| 350.6976               | -14348.6393 | -1787.1400 | 0.0000      | 0.0000    |
| 8123.4847              | 6857.7037   | 309.7616   | -1265.7810  | 6923.2685 |
| 310.1414               | -77.1004    | -83.5619   | 680285.8938 | -19.2203  |
| -19.2260               |             |            |             |           |

## Supplementary Text 6

|                        |             |            |             |           |
|------------------------|-------------|------------|-------------|-----------|
| [8511]ENERGY: 12910000 | 3376.6538   | 5491.2006  | 5729.9953   |           |
| 324.1446               | -14290.7816 | -1798.6819 | 0.0000      | 0.0000    |
| 8030.1750              | 6862.7057   | 306.2035   | -1167.4693  | 6924.0563 |
| 310.0169               | 47.1510     | 2.5273     | 680285.8938 | -17.5132  |
| -17.5223               |             |            |             |           |
| [8547]ENERGY: 12920000 | 3385.8416   | 5405.6462  | 5666.0007   |           |
| 313.8804               | -14317.4373 | -1811.5124 | 0.0000      | 0.0000    |
| 8213.8467              | 6856.2661   | 313.2072   | -1357.5806  | 6923.2254 |
| 310.0173               | 49.6904     | 13.5407    | 680285.8938 | -15.4432  |
| -15.4525               |             |            |             |           |
| [8597]ENERGY: 12930000 | 3366.9783   | 5416.3754  | 5679.0619   |           |
| 346.1893               | -14282.0407 | -1815.7606 | 0.0000      | 0.0000    |
| 8149.4717              | 6860.2753   | 310.7525   | -1289.1964  | 6925.0774 |
| 310.0458               | 101.6246    | 103.6158   | 680285.8938 | -17.0555  |
| -17.0379               |             |            |             |           |
| [8633]ENERGY: 12940000 | 3315.7702   | 5567.1243  | 5647.4502   |           |
| 333.3178               | -14345.4712 | -1813.8342 | 0.0000      | 0.0000    |
| 8153.3071              | 6857.6640   | 310.8987   | -1295.6431  | 6924.0214 |
| 310.0910               | 28.2444     | 91.6070    | 680285.8938 | -14.2713  |
| -14.2627               |             |            |             |           |
| [8683]ENERGY: 12950000 | 3328.6752   | 5507.6181  | 5676.4970   |           |
| 339.8804               | -14286.0806 | -1764.3376 | 0.0000      | 0.0000    |
| 8056.5147              | 6858.7673   | 307.2079   | -1197.7474  | 6924.2565 |
| 310.0820               | -188.5147   | -180.5039  | 680285.8938 | -11.7127  |
| -11.7024               |             |            |             |           |
| [8719]ENERGY: 12960000 | 3311.6000   | 5541.2028  | 5698.1247   |           |
| 319.5797               | -14414.8606 | -1756.8389 | 0.0000      | 0.0000    |
| 8154.1846              | 6852.9923   | 310.9322   | -1301.1923  | 6922.9702 |
| 310.1734               | -179.8656   | -123.9211  | 680285.8938 | -10.2980  |
| -10.2994               |             |            |             |           |
| [8769]ENERGY: 12970000 | 3389.6574   | 5487.8077  | 5667.9549   |           |
| 338.6162               | -14338.4548 | -1766.9042 | 0.0000      | 0.0000    |
| 8077.2434              | 6855.9206   | 307.9983   | -1221.3228  | 6924.2502 |
| 310.1206               | 28.2391     | -12.4039   | 680285.8938 | -16.7453  |
| -16.7626               |             |            |             |           |
| [8805]ENERGY: 12980000 | 3387.4862   | 5434.0367  | 5709.0546   |           |
| 343.2907               | -14344.7849 | -1766.4372 | 0.0000      | 0.0000    |
| 8096.4650              | 6859.1112   | 308.7313   | -1237.3538  | 6923.4245 |
| 309.8541               | -21.6668    | 25.1830    | 680285.8938 | -14.0955  |
| -14.0954               |             |            |             |           |
| [8855]ENERGY: 12990000 | 3365.1708   | 5430.7153  | 5671.0324   |           |
| 337.3033               | -14332.8648 | -1774.1168 | 0.0000      | 0.0000    |
| 8162.4033              | 6859.6434   | 311.2456   | -1302.7598  | 6924.5751 |
| 310.0155               | 45.1158     | -27.8502   | 680285.8938 | -10.3557  |
| -10.3556               |             |            |             |           |
| [8894]ENERGY: 13000000 | 3339.0907   | 5458.6074  | 5748.2811   |           |
| 329.7228               | -14379.2663 | -1782.5141 | 0.0000      | 0.0000    |
| 8148.0993              | 6862.0208   | 310.7002   | -1286.0785  | 6925.3117 |
| 310.0139               | 12.4891     | -15.8235   | 680285.8938 | -20.3678  |
| -20.3561               |             |            |             |           |
| [8944]ENERGY: 13010000 | 3425.6382   | 5518.7782  | 5683.3503   |           |
| 324.7700               | -14227.6313 | -1835.4109 | 0.0000      | 0.0000    |
| 7976.8278              | 6866.3223   | 304.1693   | -1110.5055  | 6925.9010 |
| 309.9978               | -143.8715   | -114.1106  | 680285.8938 | -16.7221  |



Supplementary Text 6

-16.7335  
 [8980]ENERGY: 13020000      3326.4904      5467.5205      5765.2286  
 345.1743      -14365.3475      -1814.0067      0.0000      0.0000  
 8133.7145      6858.7742      310.1516      -1274.9403      6925.1186  
 310.0883      -8.8293      -73.6782      680285.8938      -15.0511  
 -15.0535  
 [9030]ENERGY: 13030000      3361.8465      5408.5216      5666.4728  
 333.1853      -14300.5786      -1796.6023      0.0000      0.0000  
 8184.5476      6857.3929      312.0900      -1327.1546      6924.9649  
 310.1456      104.5796      38.8327      680285.8938      -16.0880  
 -16.0722  
 [9066]ENERGY: 13040000      3404.8015      5417.7977      5701.6049  
 334.0657      -14388.1514      -1771.5899      0.0000      0.0000  
 8159.9652      6858.4937      311.1526      -1301.4715      6924.6846  
 310.1698      83.4985      75.3328      680285.8938      -16.6963  
 -16.7044  
 [9116]ENERGY: 13050000      3375.0261      5482.6088      5739.0739  
 315.4423      -14325.1898      -1813.0310      0.0000      0.0000  
 8084.4529      6858.3832      308.2732      -1226.0696      6925.8516  
 310.0248      35.7812      -38.2384      680285.8938      -16.5050  
 -16.5192  
 [9152]ENERGY: 13060000      3365.2642      5423.6736      5725.3935  
 339.6509      -14348.6338      -1737.0521      0.0000      0.0000  
 8094.9024      6863.1987      308.6717      -1231.7037      6924.9571  
 310.0981      -74.4357      -134.2371      680285.8938      -15.1701  
 -15.1432  
 [9202]ENERGY: 13070000      3340.0012      5449.5627      5713.8732  
 376.4525      -14337.2259      -1834.6003      0.0000      0.0000  
 8152.7396      6860.8029      310.8771      -1291.9367      6926.4677  
 310.2514      -91.7617      -107.1898      680285.8938      -11.9569  
 -11.9493  
 [9238]ENERGY: 13080000      3355.1488      5495.2343      5742.2304  
 361.2098      -14313.7531      -1855.2840      0.0000      0.0000  
 8079.0561      6863.8423      308.0674      -1215.2138      6927.9095  
 310.1402      4.8998      22.0093      680285.8938      -12.5525  
 -12.5714  
 [9288]ENERGY: 13090000      3353.0949      5414.7554      5709.6357  
 333.8366      -14303.9403      -1791.4739      0.0000      0.0000  
 8144.2358      6860.1442      310.5528      -1284.0916      6927.8730  
 310.2079      -86.5841      -139.2750      680285.8938      -14.2283  
 -14.2388  
 [9327]ENERGY: 13100000      3339.9648      5508.7223      5753.5180  
 354.6171      -14351.0381      -1864.7556      0.0000      0.0000  
 8121.6190      6862.6476      309.6904      -1258.9715      6928.1422  
 310.1140      66.7293      39.2625      680285.8938      -16.9904  
 -16.9750  
 [9377]ENERGY: 13110000      3335.3834      5434.4087      5721.0681  
 344.4220      -14375.3194      -1735.5237      0.0000      0.0000  
 8139.4662      6863.9053      310.3710      -1275.5608      6926.9973  
 310.1274      48.8334      43.2633      680285.8938      -16.1628  
 -16.1602  
 [9413]ENERGY: 13120000      3378.2809      5480.4271      5668.6333  
 341.8595      -14306.5330      -1769.1042      0.0000      0.0000  
 8073.5973      6867.1609      307.8593      -1206.4364      6929.2080

Supplementary Text 6

|                        |             |            |             |           |
|------------------------|-------------|------------|-------------|-----------|
| 310.0953               | -198.2479   | -135.8236  | 680285.8938 | -15.5451  |
| -15.5549               |             |            |             |           |
| [9463]ENERGY: 13130000 | 3269.4741   | 5480.7427  | 5708.3487   |           |
| 337.1175               | -14295.5637 | -1812.9299 | 0.0000      | 0.0000    |
| 8174.2159              | 6861.4054   | 311.6960   | -1312.8105  | 6929.6937 |
| 310.1502               | 40.6577     | 27.3023    | 680285.8938 | -14.0331  |
| -14.0418               |             |            |             |           |
| [9499]ENERGY: 13140000 | 3260.5085   | 5444.5636  | 5705.6418   |           |
| 344.4345               | -14266.4649 | -1794.8040 | 0.0000      | 0.0000    |
| 8168.3721              | 6862.2515   | 311.4732   | -1306.1206  | 6929.3879 |
| 310.0571               | 26.4647     | -17.4677   | 680285.8938 | -12.8945  |
| -12.8948               |             |            |             |           |
| [9549]ENERGY: 13150000 | 3365.6965   | 5466.1452  | 5665.2129   |           |
| 331.3587               | -14335.3932 | -1747.6656 | 0.0000      | 0.0000    |
| 8114.8699              | 6860.2244   | 309.4331   | -1254.6455  | 6929.3239 |
| 310.1648               | -125.4065   | -77.1345   | 680285.8938 | -14.4299  |
| -14.4023               |             |            |             |           |
| [9585]ENERGY: 13160000 | 3353.2225   | 5395.3269  | 5679.3905   |           |
| 334.9875               | -14211.7577 | -1831.3023 | 0.0000      | 0.0000    |
| 8146.6048              | 6866.4722   | 310.6432   | -1280.1326  | 6930.6543 |
| 310.0785               | 7.0974      | -60.3329   | 680285.8938 | -14.2847  |
| -14.2980               |             |            |             |           |
| [9635]ENERGY: 13170000 | 3353.1018   | 5498.0952  | 5714.4984   |           |
| 317.9706               | -14264.8227 | -1794.6812 | 0.0000      | 0.0000    |
| 8040.6772              | 6864.8394   | 306.6040   | -1175.8378  | 6930.8491 |
| 309.9509               | 47.9373     | 22.6641    | 680285.8938 | -10.2066  |
| -10.2099               |             |            |             |           |
| [9671]ENERGY: 13180000 | 3430.8298   | 5419.0925  | 5648.7721   |           |
| 316.7849               | -14218.0612 | -1832.8363 | 0.0000      | 0.0000    |
| 8104.3341              | 6868.9160   | 309.0313   | -1235.4181  | 6932.1079 |
| 310.1555               | -12.4284    | -21.1363   | 680285.8938 | -18.9645  |
| -18.9611               |             |            |             |           |
| [9721]ENERGY: 13190000 | 3369.0851   | 5404.9566  | 5663.9242   |           |
| 355.9788               | -14259.2863 | -1857.7035 | 0.0000      | 0.0000    |
| 8188.0490              | 6865.0039   | 312.2235   | -1323.0451  | 6931.3528 |
| 310.1910               | 18.5339     | 4.5723     | 680285.8938 | -22.7265  |
| -22.7298               |             |            |             |           |
| [9760]ENERGY: 13200000 | 3292.9907   | 5516.0534  | 5744.0011   |           |
| 334.0066               | -14264.7319 | -1893.4706 | 0.0000      | 0.0000    |
| 8136.6364              | 6865.4857   | 310.2631   | -1271.1507  | 6932.4374 |
| 310.3379               | -60.1231    | -36.6985   | 680285.8938 | -21.4712  |
| -21.4677               |             |            |             |           |
| [9810]ENERGY: 13210000 | 3286.7999   | 5440.6824  | 5721.1795   |           |
| 340.8584               | -14321.2044 | -1815.6126 | 0.0000      | 0.0000    |
| 8214.9440              | 6867.6472   | 313.2491   | -1347.2968  | 6931.5122 |
| 310.3427               | -7.9332     | 28.0995    | 680285.8938 | -14.1462  |
| -14.1459               |             |            |             |           |
| [9846]ENERGY: 13220000 | 3337.1047   | 5474.0665  | 5719.0180   |           |
| 330.9063               | -14330.0923 | -1834.0423 | 0.0000      | 0.0000    |
| 8166.3162              | 6863.2771   | 311.3948   | -1303.0391  | 6931.6901 |
| 310.0584               | 114.2646    | 45.6484    | 680285.8938 | -18.6235  |
| -18.6455               |             |            |             |           |
| [9896]ENERGY: 13230000 | 3380.1939   | 5558.9167  | 5664.7958   |           |
| 322.7035               | -14419.9555 | -1753.9557 | 0.0000      | 0.0000    |

## Supplementary Text 6

|                         |             |            |             |           |
|-------------------------|-------------|------------|-------------|-----------|
| 8113.1101               | 6865.8088   | 309.3660   | -1247.3013  | 6932.0429 |
| 309.9249                | -83.6131    | -47.3570   | 680285.8938 | -12.8624  |
| -12.8559                |             |            |             |           |
| [9932]ENERGY: 13240000  | 3357.9161   | 5498.1426  | 5719.9155   |           |
| 349.8257                | -14383.8080 | -1810.4413 | 0.0000      | 0.0000    |
| 8135.6337               | 6867.1842   | 310.2248   | -1268.4494  | 6933.1869 |
| 310.3007                | -98.2934    | -52.0825   | 680285.8938 | -12.0865  |
| -12.0683                |             |            |             |           |
| [9982]ENERGY: 13250000  | 3369.4975   | 5442.9739  | 5676.4610   |           |
| 309.0515                | -14282.1273 | -1779.5166 | 0.0000      | 0.0000    |
| 8132.0798               | 6868.4197   | 310.0893   | -1263.6601  | 6933.2628 |
| 310.4036                | 58.0018     | -77.0101   | 680285.8938 | -16.6181  |
| -16.6265                |             |            |             |           |
| [10018]ENERGY: 13260000 | 3260.9361   | 5483.2933  | 5753.2725   |           |
| 337.9843                | -14284.2623 | -1846.9192 | 0.0000      | 0.0000    |
| 8161.6524               | 6865.9570   | 311.2170   | -1295.6954  | 6933.5054 |
| 310.2227                | 31.4777     | 1.7251     | 680285.8938 | -14.3411  |
| -14.3285                |             |            |             |           |
| [10068]ENERGY: 13270000 | 3304.6758   | 5518.8559  | 5704.6784   |           |
| 339.3982                | -14295.0657 | -1815.0403 | 0.0000      | 0.0000    |
| 8111.4631               | 6868.9655   | 309.3032   | -1242.4976  | 6933.4620 |
| 310.2816                | -2.6076     | -22.7471   | 680285.8938 | -17.0903  |
| -17.1137                |             |            |             |           |
| [10104]ENERGY: 13280000 | 3347.3447   | 5404.6562  | 5712.7274   |           |
| 336.6229                | -14297.7742 | -1808.2348 | 0.0000      | 0.0000    |
| 8173.6613               | 6869.0034   | 311.6749   | -1304.6579  | 6933.4476 |
| 310.3401                | 78.5821     | 34.5716    | 680285.8938 | -14.3687  |
| -14.3501                |             |            |             |           |
| [10154]ENERGY: 13290000 | 3316.3053   | 5481.7806  | 5638.9757   |           |
| 323.7936                | -14292.5916 | -1860.7523 | 0.0000      | 0.0000    |
| 8259.0443               | 6866.5557   | 314.9307   | -1392.4886  | 6934.5019 |
| 310.3691                | 177.0614    | 18.1161    | 680285.8938 | -16.5992  |
| -16.6037                |             |            |             |           |
| [10193]ENERGY: 13300000 | 3309.9587   | 5443.8077  | 5710.7184   |           |
| 343.2333                | -14239.6246 | -1888.2772 | 0.0000      | 0.0000    |
| 8189.8445               | 6869.6608   | 312.2920   | -1320.1837  | 6934.5561 |
| 310.3722                | -116.1375   | -94.7813   | 680285.8938 | -18.1486  |
| -18.1568                |             |            |             |           |
| [10243]ENERGY: 13310000 | 3303.0000   | 5496.1874  | 5717.9472   |           |
| 355.7194                | -14346.2351 | -1743.4342 | 0.0000      | 0.0000    |
| 8086.5218               | 6869.7065   | 308.3521   | -1216.8154  | 6933.2543 |
| 310.3326                | 31.5492     | 63.7482    | 680285.8938 | -17.9262  |
| -17.9169                |             |            |             |           |
| [10279]ENERGY: 13320000 | 3290.7523   | 5368.4571  | 5745.3556   |           |
| 352.1304                | -14251.9869 | -1821.6996 | 0.0000      | 0.0000    |
| 8186.3918               | 6869.4008   | 312.1603   | -1316.9910  | 6933.8178 |
| 310.4070                | 61.6384     | 18.0158    | 680285.8938 | -16.8361  |
| -16.8322                |             |            |             |           |
| [10329]ENERGY: 13330000 | 3274.2678   | 5530.2161  | 5685.3007   |           |
| 315.8192                | -14297.7063 | -1821.9887 | 0.0000      | 0.0000    |
| 8181.9567               | 6867.8655   | 311.9912   | -1314.0913  | 6934.5674 |
| 310.3821                | 20.4677     | -48.0283   | 680285.8938 | -16.6352  |
| -16.6599                |             |            |             |           |
| [10365]ENERGY: 13340000 | 3385.3022   | 5542.3481  | 5695.9549   |           |

## Supplementary Text 6

|                         |             |            |             |           |
|-------------------------|-------------|------------|-------------|-----------|
| 327.4107                | -14362.3919 | -1827.2629 | 0.0000      | 0.0000    |
| 8108.3994               | 6869.7606   | 309.1863   | -1238.6388  | 6934.1814 |
| 310.3855                | 17.2278     | -90.2816   | 680285.8938 | -16.3400  |
| -16.3238                |             |            |             |           |
| [10415]ENERGY: 13350000 | 3332.3766   | 5453.3174  | 5709.0677   |           |
| 347.5588                | -14203.3307 | -1823.3868 | 0.0000      | 0.0000    |
| 8054.9684               | 6870.5714   | 307.1489   | -1184.3970  | 6934.8236 |
| 310.4330                | -51.2567    | -71.6479   | 680285.8938 | -20.4296  |
| -20.4345                |             |            |             |           |
| [10451]ENERGY: 13360000 | 3403.9711   | 5511.4957  | 5710.5678   |           |
| 332.7319                | -14397.0147 | -1771.5083 | 0.0000      | 0.0000    |
| 8082.3843               | 6872.6279   | 308.1943   | -1209.7564  | 6934.6901 |
| 310.2563                | -22.2185    | 20.8266    | 680285.8938 | -15.9046  |
| -15.9054                |             |            |             |           |
| [10501]ENERGY: 13370000 | 3329.0040   | 5492.7730  | 5736.4415   |           |
| 333.4378                | -14297.3781 | -1797.9959 | 0.0000      | 0.0000    |
| 8072.5328               | 6868.8150   | 307.8187   | -1203.7178  | 6935.4259 |
| 310.2035                | 32.7475     | -123.3595  | 680285.8938 | -17.5043  |
| -17.5244                |             |            |             |           |
| [10537]ENERGY: 13380000 | 3305.4130   | 5528.3091  | 5606.5673   |           |
| 350.1741                | -14282.7846 | -1718.8984 | 0.0000      | 0.0000    |
| 8082.9686               | 6871.7492   | 308.2166   | -1211.2194  | 6934.4625 |
| 310.2775                | -2.1152     | -61.6797   | 680285.8938 | -21.8228  |
| -21.8040                |             |            |             |           |
| [10587]ENERGY: 13390000 | 3333.6088   | 5489.0666  | 5680.2913   |           |
| 326.0432                | -14245.2077 | -1806.5618 | 0.0000      | 0.0000    |
| 8094.6857               | 6871.9260   | 308.6634   | -1222.7597  | 6933.6294 |
| 310.1808                | -31.9258    | -48.9203   | 680285.8938 | -19.7795  |
| -19.7546                |             |            |             |           |
| [10626]ENERGY: 13400000 | 3358.5465   | 5489.4732  | 5707.2245   |           |
| 354.3665                | -14323.3400 | -1851.6764 | 0.0000      | 0.0000    |
| 8132.4056               | 6867.0000   | 310.1017   | -1265.4056  | 6935.4537 |
| 310.2097                | 25.3662     | -109.7359  | 680285.8938 | -22.8844  |
| -22.9003                |             |            |             |           |
| [10676]ENERGY: 13410000 | 3303.2949   | 5503.6625  | 5679.6332   |           |
| 325.4512                | -14243.1808 | -1809.8518 | 0.0000      | 0.0000    |
| 8109.0382               | 6868.0474   | 309.2107   | -1240.9907  | 6934.1892 |
| 310.2313                | 106.0500    | 94.2436    | 680285.8938 | -19.6549  |
| -19.6525                |             |            |             |           |
| [10712]ENERGY: 13420000 | 3375.2068   | 5469.0094  | 5713.9580   |           |
| 340.3722                | -14398.2965 | -1797.4272 | 0.0000      | 0.0000    |
| 8165.5145               | 6868.3371   | 311.3642   | -1297.1773  | 6935.0495 |
| 310.2201                | -88.1364    | -30.0543   | 680285.8938 | -19.0820  |
| -19.0648                |             |            |             |           |
| [10762]ENERGY: 13430000 | 3342.5543   | 5525.6038  | 5678.0544   |           |
| 340.6803                | -14362.5645 | -1782.9364 | 0.0000      | 0.0000    |
| 8129.2808               | 6870.6729   | 309.9826   | -1258.6079  | 6934.9984 |
| 310.0118                | -8.1295     | -15.4193   | 680285.8938 | -23.0050  |
| -23.0380                |             |            |             |           |
| [10798]ENERGY: 13440000 | 3354.8463   | 5406.1780  | 5704.1608   |           |
| 329.0265                | -14356.9455 | -1752.3212 | 0.0000      | 0.0000    |
| 8183.5421               | 6868.4872   | 312.0517   | -1315.0549  | 6935.2602 |
| 310.0150                | -18.5718    | -132.4182  | 680285.8938 | -21.0353  |
| -21.0347                |             |            |             |           |

## Supplementary Text 6

|                         |             |            |             |
|-------------------------|-------------|------------|-------------|
| [10848]ENERGY: 13450000 | 3422.4454   | 5477.8110  | 5681.1978   |
| 330.0824                | -14331.1511 | -1787.8578 | 0.0000      |
| 8078.2850               | 6870.8127   | 308.0380   | -1207.4723  |
| 310.1066                | -68.9384    | -90.0620   | 680285.8938 |
| -20.6325                |             |            | -20.6511    |
| [10884]ENERGY: 13460000 | 3295.0825   | 5522.0052  | 5715.5158   |
| 345.5758                | -14319.3976 | -1773.9451 | 0.0000      |
| 8085.5936               | 6870.4302   | 308.3167   | -1215.1634  |
| 310.0603                | 51.7354     | 4.5104     | 680285.8938 |
| -19.4832                |             |            | -19.4800    |
| [10934]ENERGY: 13470000 | 3403.7335   | 5541.7604  | 5661.7658   |
| 328.0484                | -14305.4045 | -1801.7788 | 0.0000      |
| 8044.2540               | 6872.3789   | 306.7404   | -1171.8751  |
| 310.1830                | -58.6570    | -78.3026   | 680285.8938 |
| -10.2563                |             |            | -10.2540    |
| [10970]ENERGY: 13480000 | 3267.3390   | 5552.0164  | 5675.5937   |
| 352.2906                | -14219.4356 | -1812.3118 | 0.0000      |
| 8055.5787               | 6871.0710   | 307.1722   | -1184.5077  |
| 310.0060                | 137.6075    | 124.0081   | 680285.8938 |
| -17.7428                |             |            | -17.7364    |
| [11020]ENERGY: 13490000 | 3275.0641   | 5508.1501  | 5714.7817   |
| 367.1097                | -14272.4440 | -1843.1474 | 0.0000      |
| 8123.4351               | 6872.9494   | 309.7597   | -1250.4857  |
| 310.2440                | 76.4517     | 74.8613    | 680285.8938 |
| -18.5524                |             |            | -18.5705    |
| [11059]ENERGY: 13500000 | 3346.8297   | 5413.9414  | 5752.9571   |
| 351.8320                | -14288.8931 | -1815.1492 | 0.0000      |
| 8110.6722               | 6872.1901   | 309.2730   | -1238.4821  |
| 310.3768                | 27.0908     | 1.1430     | 680285.8938 |
| -16.0446                |             |            | -16.0293    |
| [11109]ENERGY: 13510000 | 3306.7178   | 5440.1924  | 5705.7285   |
| 323.5755                | -14213.5658 | -1827.6557 | 0.0000      |
| 8136.4183               | 6871.4111   | 310.2548   | -1265.0073  |
| 310.1892                | -9.7069     | 23.4920    | 680285.8938 |
| -20.5114                |             |            | -20.5136    |
| [11145]ENERGY: 13520000 | 3390.6384   | 5479.4693  | 5699.3709   |
| 324.5278                | -14318.6754 | -1792.2175 | 0.0000      |
| 8087.0547               | 6870.1682   | 308.3724   | -1216.8864  |
| 310.2086                | 6.0267      | 15.2675    | 680285.8938 |
| -15.6505                |             |            | -15.6551    |
| [11195]ENERGY: 13530000 | 3326.5853   | 5486.2152  | 5711.6272   |
| 351.6923                | -14241.0515 | -1805.7465 | 0.0000      |
| 8040.9710               | 6870.2930   | 306.6152   | -1170.6780  |
| 310.2082                | -76.0505    | -75.8263   | 680285.8938 |
| -19.2991                |             |            | -19.2964    |
| [11231]ENERGY: 13540000 | 3293.7386   | 5535.8579  | 5731.2449   |
| 324.6612                | -14291.7422 | -1810.7136 | 0.0000      |
| 8083.4975               | 6866.5444   | 308.2368   | -1216.9531  |
| 310.1881                | 119.8424    | 27.5431    | 680285.8938 |
| -18.8033                |             |            | -18.8112    |
| [11281]ENERGY: 13550000 | 3346.2480   | 5403.3562  | 5685.3951   |
| 348.1182                | -14313.7564 | -1756.8228 | 0.0000      |
| 8156.6532               | 6869.1915   | 311.0263   | -1287.4617  |
| 310.1919                | 39.2875     | -57.9504   | 680285.8938 |
|                         |             |            | -23.1991    |

Supplementary Text 6

-23.2305  
 [11317]ENERGY: 13560000      3280.6641      5389.8622      5758.6915  
 341.3200      -14309.9788      -1800.2636      0.0000      0.0000  
 8207.1299      6867.4252      312.9511      -1339.7047      6935.0601  
 310.1767      -134.6117      -117.7806      680285.8938      -18.1629  
 -18.1327  
 [11367]ENERGY: 13570000      3347.6515      5545.7831      5742.6941  
 335.0949      -14298.4326      -1837.0218      0.0000      0.0000  
 8033.3754      6869.1446      306.3256      -1164.2308      6936.6601  
 310.2659      -15.7765      -113.9256      680285.8938      -18.8875  
 -18.9038  
 [11403]ENERGY: 13580000      3307.9971      5332.9445      5757.1354  
 341.8663      -14253.5390      -1826.1453      0.0000      0.0000  
 8211.5402      6871.7993      313.1193      -1339.7409      6936.7133  
 310.2829      46.2363      -91.0735      680285.8938      -20.4020  
 -20.3967  
 [11453]ENERGY: 13590000      3318.8391      5517.3055      5665.9931  
 334.5989      -14322.0482      -1815.9324      0.0000      0.0000  
 8169.7196      6868.4756      311.5246      -1301.2440      6934.6420  
 310.3534      112.0615      81.8421      680285.8938      -20.1499  
 -20.1362  
 [11492]ENERGY: 13600000      3368.2864      5463.9185      5673.2291  
 354.6319      -14291.4150      -1854.3658      0.0000      0.0000  
 8153.8903      6868.1754      310.9210      -1285.7149      6934.8793  
 310.3509      -58.8134      -32.6259      680285.8938      -18.5732  
 -18.5828  
 [11542]ENERGY: 13610000      3291.4319      5532.6451      5710.1926  
 353.8989      -14263.7950      -1816.4448      0.0000      0.0000  
 8065.0271      6872.9559      307.5325      -1192.0712      6935.7696  
 310.2546      59.2154      34.5622      680285.8938      -16.7620  
 -16.7690  
 [11578]ENERGY: 13620000      3380.0213      5470.2604      5712.1157  
 358.2146      -14304.7934      -1794.9168      0.0000      0.0000  
 8052.5804      6873.4821      307.0579      -1179.0983      6937.0291  
 310.1371      -122.7368      -137.3571      680285.8938      -20.8863  
 -20.8811  
 [11628]ENERGY: 13630000      3295.3516      5380.4733      5682.8511  
 331.2955      -14245.9419      -1771.9793      0.0000      0.0000  
 8199.9497      6872.0001      312.6773      -1327.9496      6937.6593  
 310.2037      43.4892      23.3827      680285.8938      -19.1783  
 -19.1942  
 [11664]ENERGY: 13640000      3376.1605      5472.4734      5698.6731  
 315.7026      -14283.2435      -1809.7961      0.0000      0.0000  
 8106.9410      6876.9111      309.1307      -1230.0299      6938.4503  
 310.1904      -128.5571      -132.5238      680285.8938      -23.5874  
 -23.5649  
 [11714]ENERGY: 13650000      3338.5629      5452.9112      5718.3178  
 344.8124      -14327.1169      -1804.9373      0.0000      0.0000  
 8148.4821      6871.0322      310.7148      -1277.4499      6937.4700  
 310.2096      51.8864      18.6618      680285.8938      -26.4115  
 -26.4203  
 [11750]ENERGY: 13660000      3365.2716      5449.7872      5685.6859  
 356.3992      -14422.9292      -1745.1781      0.0000      0.0000  
 8184.1908      6873.2274      312.0764      -1310.9634      6938.2161

## Supplementary Text 6

|                         |             |            |             |           |
|-------------------------|-------------|------------|-------------|-----------|
| 310.1216                | 51.5060     | 15.7508    | 680285.8938 | -23.2542  |
| -23.2530                |             |            |             |           |
| [11800]ENERGY: 13670000 | 3284.8025   | 5476.7710  | 5714.0351   |           |
| 361.8732                | -14365.9714 | -1757.5388 | 0.0000      | 0.0000    |
| 8155.2309               | 6869.2025   | 310.9721   | -1286.0284  | 6938.2777 |
| 310.3687                | 128.4004    | 75.6210    | 680285.8938 | -15.3240  |
| -15.3240                |             |            |             |           |
| [11836]ENERGY: 13680000 | 3325.8835   | 5505.2567  | 5692.5306   |           |
| 343.8897                | -14261.8930 | -1890.9391 | 0.0000      | 0.0000    |
| 8159.6135               | 6874.3418   | 311.1392   | -1285.2717  | 6938.3670 |
| 309.9703                | -110.6732   | -53.5251   | 680285.8938 | -17.9634  |
| -17.9658                |             |            |             |           |
| [11886]ENERGY: 13690000 | 3330.1127   | 5533.1079  | 5721.2240   |           |
| 319.2616                | -14333.4002 | -1848.4184 | 0.0000      | 0.0000    |
| 8151.7519               | 6873.6395   | 310.8394   | -1278.1124  | 6939.3419 |
| 310.0486                | 2.8652      | -6.0639    | 680285.8938 | -19.4273  |
| -19.4217                |             |            |             |           |
| [11925]ENERGY: 13700000 | 3256.1626   | 5561.7183  | 5735.9503   |           |
| 355.7004                | -14335.3786 | -1745.0407 | 0.0000      | 0.0000    |
| 8044.9251               | 6874.0374   | 306.7660   | -1170.8877  | 6939.8675 |
| 310.0473                | 214.0255    | 139.4862   | 680285.8938 | -18.5016  |
| -18.4972                |             |            |             |           |
| [11975]ENERGY: 13710000 | 3376.4038   | 5475.7598  | 5726.8562   |           |
| 344.3578                | -14407.0913 | -1736.0604 | 0.0000      | 0.0000    |
| 8092.8821               | 6873.1080   | 308.5946   | -1219.7741  | 6937.7237 |
| 310.1805                | -80.2165    | 5.2970     | 680285.8938 | -21.7599  |
| -21.7570                |             |            |             |           |
| [12011]ENERGY: 13720000 | 3284.0017   | 5478.4425  | 5739.2698   |           |
| 346.3672                | -14324.8983 | -1708.8333 | 0.0000      | 0.0000    |
| 8060.5044               | 6874.8540   | 307.3600   | -1185.6504  | 6939.8450 |
| 310.0404                | 147.6465    | 113.9127   | 680285.8938 | -20.9118  |
| -20.9245                |             |            |             |           |
| [12061]ENERGY: 13730000 | 3305.2963   | 5490.5853  | 5672.9582   |           |
| 344.9515                | -14204.1767 | -1922.6213 | 0.0000      | 0.0000    |
| 8188.5245               | 6875.5177   | 312.2416   | -1313.0068  | 6939.5789 |
| 310.2439                | -81.9037    | -165.8801  | 680285.8938 | -18.9429  |
| -18.9263                |             |            |             |           |
| [12097]ENERGY: 13740000 | 3400.8534   | 5559.4036  | 5722.3726   |           |
| 303.3186                | -14415.0749 | -1795.8306 | 0.0000      | 0.0000    |
| 8103.5531               | 6878.5960   | 309.0015   | -1224.9572  | 6940.8013 |
| 310.2906                | -35.1552    | -85.5532   | 680285.8938 | -17.5307  |
| -17.5456                |             |            |             |           |
| [12147]ENERGY: 13750000 | 3318.0440   | 5440.4926  | 5742.6575   |           |
| 325.9140                | -14291.9121 | -1788.4857 | 0.0000      | 0.0000    |
| 8124.0595               | 6870.7698   | 309.7835   | -1253.2896  | 6940.3799 |
| 310.0687                | 110.5453    | 29.3427    | 680285.8938 | -15.0261  |
| -15.0064                |             |            |             |           |
| [12183]ENERGY: 13760000 | 3418.4794   | 5504.6315  | 5736.5046   |           |
| 317.0979                | -14341.4211 | -1865.4343 | 0.0000      | 0.0000    |
| 8105.2247               | 6875.0827   | 309.0653   | -1230.1420  | 6938.9116 |
| 310.1905                | -82.2675    | -109.5037  | 680285.8938 | -17.0768  |
| -17.0934                |             |            |             |           |
| [12233]ENERGY: 13770000 | 3423.5006   | 5487.5985  | 5703.5625   |           |
| 336.9154                | -14302.6434 | -1826.9030 | 0.0000      | 0.0000    |

## Supplementary Text 6

|                         |             |            |             |           |
|-------------------------|-------------|------------|-------------|-----------|
| 8054.9309               | 6876.9616   | 307.1475   | -1177.9693  | 6938.7722 |
| 310.3938                | -150.8548   | -86.0037   | 680285.8938 | -16.8264  |
| -16.8156                |             |            |             |           |
| [12269]ENERGY: 13780000 | 3348.9925   | 5446.9251  | 5653.2714   |           |
| 329.7089                | -14285.2287 | -1815.7240 | 0.0000      | 0.0000    |
| 8195.4074               | 6873.3526   | 312.5041   | -1322.0548  | 6940.2926 |
| 310.3260                | 14.8810     | -13.4085   | 680285.8938 | -14.2079  |
| -14.2376                |             |            |             |           |
| [12319]ENERGY: 13790000 | 3338.4300   | 5490.7076  | 5711.3835   |           |
| 342.4720                | -14335.6640 | -1833.1252 | 0.0000      | 0.0000    |
| 8158.0050               | 6872.2088   | 311.0779   | -1285.7961  | 6942.0082 |
| 310.3181                | 23.9263     | 73.1920    | 680285.8938 | -14.5563  |
| -14.5399                |             |            |             |           |
| [12358]ENERGY: 13800000 | 3350.4743   | 5487.1824  | 5720.0231   |           |
| 348.7932                | -14328.9638 | -1826.8504 | 0.0000      | 0.0000    |
| 8125.9168               | 6876.5756   | 309.8543   | -1249.3412  | 6940.7641 |
| 310.3713                | -70.9010    | -132.5315  | 680285.8938 | -18.3156  |
| -18.3231                |             |            |             |           |
| [12408]ENERGY: 13810000 | 3399.3485   | 5562.9295  | 5646.5841   |           |
| 358.8868                | -14417.9010 | -1845.8728 | 0.0000      | 0.0000    |
| 8169.2430               | 6873.2182   | 311.5064   | -1296.0248  | 6941.4702 |
| 310.3864                | -40.7696    | -76.3614   | 680285.8938 | -18.4762  |
| -18.4735                |             |            |             |           |
| [12444]ENERGY: 13820000 | 3335.6391   | 5358.0488  | 5720.7801   |           |
| 357.4185                | -14277.6701 | -1880.1053 | 0.0000      | 0.0000    |
| 8257.4931               | 6871.6043   | 314.8715   | -1385.8889  | 6941.8931 |
| 310.5351                | 49.9168     | 18.5971    | 680285.8938 | -15.9676  |
| -15.9629                |             |            |             |           |
| [12494]ENERGY: 13830000 | 3406.5812   | 5541.7939  | 5711.3675   |           |
| 346.2285                | -14352.2272 | -1804.6497 | 0.0000      | 0.0000    |
| 8031.8049               | 6880.8991   | 306.2657   | -1150.9058  | 6944.0200 |
| 310.3671                | 70.8983     | 24.5963    | 680285.8938 | -20.0321  |
| -20.0366                |             |            |             |           |
| [12530]ENERGY: 13840000 | 3369.9602   | 5485.3039  | 5722.2629   |           |
| 367.1169                | -14416.9490 | -1833.2321 | 0.0000      | 0.0000    |
| 8179.8337               | 6874.2964   | 311.9102   | -1305.5372  | 6942.9712 |
| 310.5000                | -136.2542   | -125.1199  | 680285.8938 | -16.9265  |
| -16.9211                |             |            |             |           |
| [12580]ENERGY: 13850000 | 3323.8831   | 5518.0176  | 5684.5076   |           |
| 341.5266                | -14332.9896 | -1861.7076 | 0.0000      | 0.0000    |
| 8205.9865               | 6879.2242   | 312.9075   | -1326.7623  | 6944.8104 |
| 310.5856                | -59.6812    | -134.1345  | 680285.8938 | -17.5174  |
| -17.5151                |             |            |             |           |
| [12616]ENERGY: 13860000 | 3374.9806   | 5591.2939  | 5666.9142   |           |
| 354.1237                | -14430.7091 | -1817.2801 | 0.0000      | 0.0000    |
| 8138.1024               | 6877.4256   | 310.3190   | -1260.6768  | 6944.0591 |
| 310.6432                | -41.7216    | -23.9388   | 680285.8938 | -19.1780  |
| -19.1784                |             |            |             |           |
| [12666]ENERGY: 13870000 | 3389.0640   | 5416.1553  | 5685.2472   |           |
| 339.5240                | -14273.5090 | -1862.8050 | 0.0000      | 0.0000    |
| 8185.4799               | 6879.1564   | 312.1255   | -1306.3236  | 6944.0218 |
| 310.6120                | -210.2818   | -196.5565  | 680285.8938 | -18.7328  |
| -18.7468                |             |            |             |           |
| [12702]ENERGY: 13880000 | 3279.9304   | 5613.8975  | 5718.0654   |           |



## Supplementary Text 6

|                         |             |            |             |           |
|-------------------------|-------------|------------|-------------|-----------|
| 334.0522                | -14342.6350 | -1858.1593 | 0.0000      | 0.0000    |
| 8133.9472               | 6879.0984   | 310.1605   | -1254.8488  | 6944.8817 |
| 310.5864                | 20.1758     | 14.1938    | 680285.8938 | -20.8196  |
| -20.8138                |             |            |             |           |
| [12752]ENERGY: 13890000 | 3416.4841   | 5485.9108  | 5683.5854   |           |
| 353.6215                | -14305.7250 | -1819.8879 | 0.0000      | 0.0000    |
| 8068.5661               | 6882.5550   | 307.6674   | -1186.0111  | 6944.8970 |
| 310.4368                | -110.4598   | -103.9595  | 680285.8938 | -19.4778  |
| -19.4660                |             |            |             |           |
| [12791]ENERGY: 13900000 | 3321.6736   | 5492.7372  | 5701.1855   |           |
| 340.9759                | -14303.8480 | -1795.5493 | 0.0000      | 0.0000    |
| 8118.5349               | 6875.7098   | 309.5728   | -1242.8251  | 6943.4238 |
| 310.6697                | 5.8468      | 10.6488    | 680285.8938 | -19.1027  |
| -19.0990                |             |            |             |           |
| [12841]ENERGY: 13910000 | 3341.9092   | 5604.8973  | 5728.1279   |           |
| 340.5566                | -14370.5135 | -1837.7136 | 0.0000      | 0.0000    |
| 8072.3756               | 6879.6394   | 307.8127   | -1192.7362  | 6943.3432 |
| 310.6626                | 4.7313      | 26.8309    | 680285.8938 | -17.3187  |
| -17.3274                |             |            |             |           |
| [12877]ENERGY: 13920000 | 3428.8786   | 5433.0282  | 5760.4312   |           |
| 337.2390                | -14342.6057 | -1874.9177 | 0.0000      | 0.0000    |
| 8137.9279               | 6879.9815   | 310.3123   | -1257.9463  | 6944.3372 |
| 310.7372                | -96.4835    | -122.5466  | 680285.8938 | -19.4124  |
| -19.4188                |             |            |             |           |
| [12927]ENERGY: 13930000 | 3290.5919   | 5531.6901  | 5680.1031   |           |
| 329.6292                | -14353.2758 | -1813.1701 | 0.0000      | 0.0000    |
| 8217.3459               | 6882.9142   | 313.3406   | -1334.4317  | 6945.4589 |
| 310.5391                | 98.5469     | 75.8521    | 680285.8938 | -16.8111  |
| -16.7851                |             |            |             |           |
| [12963]ENERGY: 13940000 | 3294.4793   | 5520.9109  | 5732.3923   |           |
| 359.4655                | -14351.8249 | -1829.0468 | 0.0000      | 0.0000    |
| 8155.9977               | 6882.3740   | 311.0013   | -1273.6237  | 6945.7956 |
| 310.8094                | -57.7422    | -11.1813   | 680285.8938 | -12.4309  |
| -12.4476                |             |            |             |           |
| [13013]ENERGY: 13950000 | 3303.6410   | 5514.0970  | 5725.6002   |           |
| 330.8228                | -14317.7619 | -1829.9897 | 0.0000      | 0.0000    |
| 8148.8727               | 6875.2822   | 310.7297   | -1273.5905  | 6944.2334 |
| 310.7270                | -73.9809    | 28.9250    | 680285.8938 | -17.4085  |
| -17.4047                |             |            |             |           |
| [13049]ENERGY: 13960000 | 3410.6594   | 5504.4009  | 5717.5475   |           |
| 356.2201                | -14316.2172 | -1943.0758 | 0.0000      | 0.0000    |
| 8150.6697               | 6880.2046   | 310.7982   | -1270.4651  | 6945.0022 |
| 310.6538                | -126.7791   | -116.4931  | 680285.8938 | -16.0529  |
| -16.0553                |             |            |             |           |
| [13099]ENERGY: 13970000 | 3312.7874   | 5450.6958  | 5730.4179   |           |
| 346.0341                | -14367.5737 | -1795.4618 | 0.0000      | 0.0000    |
| 8199.6964               | 6876.5961   | 312.6676   | -1323.1003  | 6945.7080 |
| 310.7783                | -45.1930    | -104.1934  | 680285.8938 | -13.5213  |
| -13.5137                |             |            |             |           |
| [13135]ENERGY: 13980000 | 3326.7885   | 5534.6813  | 5777.1046   |           |
| 351.4124                | -14361.5732 | -1835.9681 | 0.0000      | 0.0000    |
| 8090.3773               | 6882.8229   | 308.4991   | -1207.5544  | 6946.6570 |
| 310.7896                | 104.0715    | -63.5203   | 680285.8938 | -16.5975  |
| -16.6176                |             |            |             |           |

## Supplementary Text 6

|                         |             |            |             |
|-------------------------|-------------|------------|-------------|
| [13185]ENERGY: 13990000 | 3331.2903   | 5531.8269  | 5737.5932   |
| 350.8388                | -14360.7813 | -1823.2210 | 0.0000      |
| 8114.8457               | 6882.3926   | 309.4322   | -1232.4531  |
| 310.9796                | -16.3508    | -22.5678   | 680285.8938 |
| -16.2446                |             |            | -16.2540    |
| [13224]ENERGY: 14000000 | 3360.3950   | 5536.6556  | 5694.7868   |
| 354.8604                | -14436.2257 | -1762.3072 | 0.0000      |
| 8133.9984               | 6882.1634   | 310.1625   | -1251.8351  |
| 310.8752                | 100.1507    | 96.4822    | 680285.8938 |
| -15.3405                |             |            | -15.3363    |
| [13274]ENERGY: 14010000 | 3387.2979   | 5536.2982  | 5694.8809   |
| 325.8803                | -14348.4972 | -1820.5710 | 0.0000      |
| 8107.5129               | 6882.8020   | 309.1525   | -1224.7109  |
| 310.6566                | -182.6748   | -135.9689  | 680285.8938 |
| -15.7011                |             |            | -15.7155    |
| [13310]ENERGY: 14020000 | 3324.3859   | 5547.0213  | 5694.2929   |
| 330.6372                | -14321.8734 | -1778.4769 | 0.0000      |
| 8086.3597               | 6882.3468   | 308.3459   | -1204.0129  |
| 310.7966                | 93.2278     | 36.3513    | 680285.8938 |
| -15.8345                |             |            | -15.8140    |
| [13360]ENERGY: 14030000 | 3333.6258   | 5439.2047  | 5773.1419   |
| 360.5313                | -14330.4749 | -1794.5967 | 0.0000      |
| 8104.7304               | 6886.1625   | 309.0464   | -1218.5679  |
| 310.8802                | 46.4755     | 4.8915     | 680285.8938 |
| -15.0825                |             |            | -15.0847    |
| [13396]ENERGY: 14040000 | 3345.4860   | 5488.1419  | 5701.2215   |
| 339.8240                | -14312.3863 | -1796.1742 | 0.0000      |
| 8113.4435               | 6879.5564   | 309.3787   | -1233.8871  |
| 310.7962                | -59.6869    | -121.7208  | 680285.8938 |
| -14.4643                |             |            | -14.4702    |
| [13446]ENERGY: 14050000 | 3319.9129   | 5445.8327  | 5731.3436   |
| 337.9693                | -14319.6331 | -1862.7608 | 0.0000      |
| 8228.7644               | 6881.4290   | 313.7761   | -1347.3354  |
| 310.8717                | -71.2617    | -41.4461   | 680285.8938 |
| -11.2630                |             |            | -11.2547    |
| [13482]ENERGY: 14060000 | 3412.0009   | 5472.4597  | 5704.1591   |
| 330.7106                | -14366.2723 | -1837.4303 | 0.0000      |
| 8168.2494               | 6883.8772   | 311.4685   | -1284.3722  |
| 310.7761                | -153.6822   | -140.3089  | 680285.8938 |
| -15.9728                |             |            | -15.9820    |
| [13532]ENERGY: 14070000 | 3265.7476   | 5578.5190  | 5783.5774   |
| 334.8591                | -14386.6941 | -1820.5746 | 0.0000      |
| 8129.4136               | 6884.8480   | 309.9876   | -1244.5656  |
| 310.7811                | 129.4260    | 64.7491    | 680285.8938 |
| -15.3575                |             |            | -15.3702    |
| [13568]ENERGY: 14080000 | 3257.7878   | 5542.8453  | 5771.0019   |
| 342.2113                | -14341.2451 | -1804.8035 | 0.0000      |
| 8118.0392               | 6885.8370   | 309.5539   | -1232.2022  |
| 310.9061                | 160.2832    | 121.8781   | 680285.8938 |
| -11.0380                |             |            | -11.0363    |
| [13618]ENERGY: 14090000 | 3374.4789   | 5432.2678  | 5667.0621   |
| 330.6753                | -14345.8180 | -1777.4002 | 0.0000      |
| 8204.3907               | 6885.6567   | 312.8466   | -1318.7341  |
| 310.8884                | 112.7868    | 124.4092   | 680285.8938 |
|                         |             |            | -16.1685    |

## Supplementary Text 6

-16.1687  
[13657]ENERGY: 14100000 3371.7705 5472.8681 5723.5739  
346.9867 -14340.9566 -1799.4236 0.0000 0.0000  
8109.9054 6884.7242 309.2438 -1225.1812 6950.3577  
310.9780 10.5093 -91.9389 680285.8938 -7.4474  
-7.4464  
[13707]ENERGY: 14110000 3385.7947 5479.8580 5654.0736  
343.4475 -14304.7327 -1828.8370 0.0000 0.0000  
8153.2223 6882.8264 310.8955 -1270.3959 6951.9990  
311.0253 105.2039 62.6255 680285.8938 -13.9792  
-13.9861  
[13743]ENERGY: 14120000 3335.4170 5441.6103 5738.5377  
339.7538 -14369.2557 -1752.1307 0.0000 0.0000  
8152.3412 6886.2736 310.8619 -1266.0677 6950.0712  
310.9156 -17.3769 23.4408 680285.8938 -8.6252  
-8.6336  
[13793]ENERGY: 14130000 3355.9954 5573.6317 5656.2891  
334.1977 -14389.2052 -1768.5998 0.0000 0.0000  
8125.3828 6887.6918 309.8340 -1237.6911 6950.6709  
310.8864 -71.6453 -125.7896 680285.8938 -8.9261  
-8.9364  
[13829]ENERGY: 14140000 3340.5050 5512.3998 5734.6511  
342.4271 -14365.3528 -1804.4093 0.0000 0.0000  
8125.5817 6885.8026 309.8415 -1239.7791 6951.6565  
311.0765 71.5406 5.0013 680285.8938 -11.0128  
-11.0051  
[13879]ENERGY: 14150000 3378.0225 5497.3060 5709.3187  
363.8316 -14344.3195 -1811.3893 0.0000 0.0000  
8093.6539 6886.4238 308.6241 -1207.2300 6952.0240  
311.0091 -76.8016 -92.1680 680285.8938 -10.7872  
-10.7739  
[13915]ENERGY: 14160000 3329.6744 5516.0135 5713.4980  
353.2201 -14305.4962 -1836.5626 0.0000 0.0000  
8115.6157 6885.9629 309.4615 -1229.6528 6951.3087  
310.9073 94.7888 80.9745 680285.8938 -15.4806  
-15.4851  
[13965]ENERGY: 14170000 3391.8026 5459.5563 5671.3204  
331.1970 -14328.8686 -1796.3479 0.0000 0.0000  
8158.5142 6887.1740 311.0973 -1271.3402 6951.2670  
311.1042 -70.5608 -158.7315 680285.8938 -10.1227  
-10.1363  
[14001]ENERGY: 14180000 3292.9254 5516.8514 5712.7324  
345.2413 -14341.0597 -1804.1772 0.0000 0.0000  
8164.0719 6886.5855 311.3092 -1277.4864 6952.9962  
310.9573 -66.4119 -65.0197 680285.8938 -11.0379  
-11.0272  
[14051]ENERGY: 14190000 3307.2406 5515.2570 5734.6780  
339.0172 -14353.1827 -1829.0475 0.0000 0.0000  
8171.3051 6885.2677 311.5850 -1286.0374 6952.1153  
310.8316 86.0442 93.3167 680285.8938 -10.6201  
-10.6250  
[14090]ENERGY: 14200000 3334.8624 5509.3195 5715.8013  
333.5881 -14333.5441 -1826.2022 0.0000 0.0000  
8151.7525 6885.5776 310.8395 -1266.1749 6953.9753

## Supplementary Text 6

|                         |             |            |             |           |
|-------------------------|-------------|------------|-------------|-----------|
| 310.7801                | -77.1673    | -48.4250   | 680285.8938 | -14.2539  |
| -14.2424                |             |            |             |           |
| [14140]ENERGY: 14210000 | 3426.7779   | 5486.8924  | 5744.8063   |           |
| 350.7964                | -14331.1308 | -1868.8530 | 0.0000      | 0.0000    |
| 8077.4733               | 6886.7625   | 308.0071   | -1190.7108  | 6953.1197 |
| 310.7078                | -164.2207   | -204.1407  | 680285.8938 | -10.9970  |
| -11.0087                |             |            |             |           |
| [14176]ENERGY: 14220000 | 3305.0816   | 5505.5962  | 5724.7939   |           |
| 341.4535                | -14299.4161 | -1820.9025 | 0.0000      | 0.0000    |
| 8129.6165               | 6886.2231   | 309.9954   | -1243.3934  | 6953.3293 |
| 310.7017                | -3.1773     | -8.8393    | 680285.8938 | -12.8485  |
| -12.8519                |             |            |             |           |
| [14226]ENERGY: 14230000 | 3325.7966   | 5430.1242  | 5725.8830   |           |
| 319.1834                | -14362.0356 | -1699.0548 | 0.0000      | 0.0000    |
| 8148.2208               | 6888.1175   | 310.7048   | -1260.1032  | 6952.3990 |
| 310.7272                | 152.1004    | 129.0210   | 680285.8938 | -13.2927  |
| -13.2741                |             |            |             |           |
| [14262]ENERGY: 14240000 | 3399.7337   | 5487.5814  | 5711.9350   |           |
| 348.0737                | -14353.7870 | -1773.9361 | 0.0000      | 0.0000    |
| 8071.6836               | 6891.2843   | 307.7863   | -1180.3993  | 6953.2442 |
| 310.6170                | -30.8397    | -52.0856   | 680285.8938 | -14.0336  |
| -14.0433                |             |            |             |           |
| [14312]ENERGY: 14250000 | 3352.4798   | 5522.0497  | 5722.0780   |           |
| 343.0601                | -14381.8655 | -1822.4303 | 0.0000      | 0.0000    |
| 8151.4666               | 6886.8384   | 310.8286   | -1264.6282  | 6953.6384 |
| 310.7956                | 92.5913     | 65.3486    | 680285.8938 | -14.5174  |
| -14.5153                |             |            |             |           |
| [14348]ENERGY: 14260000 | 3417.4895   | 5552.2334  | 5679.5263   |           |
| 328.8826                | -14324.8496 | -1860.3225 | 0.0000      | 0.0000    |
| 8097.0131               | 6889.9729   | 308.7522   | -1207.0402  | 6953.9997 |
| 310.7915                | -126.4832   | -130.5449  | 680285.8938 | -9.8203   |
| -9.8188                 |             |            |             |           |
| [14398]ENERGY: 14270000 | 3385.3732   | 5527.3028  | 5708.5044   |           |
| 340.2496                | -14379.6517 | -1769.9269 | 0.0000      | 0.0000    |
| 8077.1983               | 6889.0496   | 307.9966   | -1188.1487  | 6953.4916 |
| 311.0093                | -32.7084    | -45.7006   | 680285.8938 | -14.3204  |
| -14.3202                |             |            |             |           |
| [14434]ENERGY: 14280000 | 3435.3558   | 5450.7303  | 5679.5541   |           |
| 362.2358                | -14342.0793 | -1779.6914 | 0.0000      | 0.0000    |
| 8084.7107               | 6890.8160   | 308.2831   | -1193.8946  | 6953.2430 |
| 311.0501                | -11.4686    | -76.1496   | 680285.8938 | -13.5556  |
| -13.5666                |             |            |             |           |
| [14484]ENERGY: 14290000 | 3356.8652   | 5481.6435  | 5667.0344   |           |
| 347.8158                | -14372.6098 | -1769.1217 | 0.0000      | 0.0000    |
| 8175.8999               | 6887.5273   | 311.7602   | -1288.3726  | 6952.6834 |
| 311.0583                | 57.1816     | 8.9773     | 680285.8938 | -13.1128  |
| -13.1061                |             |            |             |           |
| [14523]ENERGY: 14300000 | 3348.1118   | 5518.3845  | 5713.8047   |           |
| 343.3506                | -14417.6316 | -1787.2014 | 0.0000      | 0.0000    |
| 8169.6869               | 6888.5055   | 311.5233   | -1281.1815  | 6955.4544 |
| 310.7097                | 69.5811     | 44.0205    | 680285.8938 | -16.7868  |
| -16.7855                |             |            |             |           |
| [14573]ENERGY: 14310000 | 3301.6841   | 5504.3654  | 5784.8622   |           |
| 368.6437                | -14353.5455 | -1843.0360 | 0.0000      | 0.0000    |

## Supplementary Text 6

|                         |             |            |             |           |
|-------------------------|-------------|------------|-------------|-----------|
| 8125.1029               | 6888.0768   | 309.8233   | -1237.0261  | 6954.6337 |
| 310.9676                | -233.3687   | -123.8697  | 680285.8938 | -15.1378  |
| -15.1484                |             |            |             |           |
| [14609]ENERGY: 14320000 | 3309.4976   | 5449.8030  | 5726.3746   |           |
| 334.0192                | -14333.7309 | -1750.3567 | 0.0000      | 0.0000    |
| 8150.7537               | 6886.3605   | 310.8014   | -1264.3932  | 6954.4050 |
| 311.0682                | -41.1065    | -45.4595   | 680285.8938 | -11.2199  |
| -11.2129                |             |            |             |           |
| [14659]ENERGY: 14330000 | 3394.8852   | 5427.4328  | 5766.2920   |           |
| 340.4628                | -14399.3731 | -1802.0508 | 0.0000      | 0.0000    |
| 8160.9348               | 6888.5835   | 311.1896   | -1272.3512  | 6953.5068 |
| 311.0537                | -43.7370    | 15.0812    | 680285.8938 | -17.6857  |
| -17.6919                |             |            |             |           |
| [14695]ENERGY: 14340000 | 3300.9487   | 5429.0450  | 5767.1970   |           |
| 363.6241                | -14448.2169 | -1703.6174 | 0.0000      | 0.0000    |
| 8174.8249               | 6883.8053   | 311.7193   | -1291.0196  | 6953.3895 |
| 310.6635                | 44.6092     | -2.4155    | 680285.8938 | -19.2386  |
| -19.2259                |             |            |             |           |
| [14745]ENERGY: 14350000 | 3334.5047   | 5537.9788  | 5715.5434   |           |
| 355.6196                | -14358.3880 | -1751.0939 | 0.0000      | 0.0000    |
| 8056.5586               | 6890.7231   | 307.2096   | -1165.8355  | 6954.8307 |
| 310.6830                | 67.8178     | 22.6108    | 680285.8938 | -16.3429  |
| -16.3444                |             |            |             |           |
| [14781]ENERGY: 14360000 | 3366.1976   | 5519.0643  | 5696.2228   |           |
| 336.1533                | -14363.0670 | -1771.1593 | 0.0000      | 0.0000    |
| 8106.2207               | 6889.6325   | 309.1033   | -1216.5883  | 6955.2702 |
| 310.8969                | 21.5964     | 11.1919    | 680285.8938 | -16.7535  |
| -16.7386                |             |            |             |           |
| [14831]ENERGY: 14370000 | 3410.6224   | 5432.8303  | 5689.5103   |           |
| 357.1183                | -14280.4660 | -1860.9559 | 0.0000      | 0.0000    |
| 8139.0020               | 6887.6614   | 310.3533   | -1251.3405  | 6956.4378 |
| 310.9621                | 34.2715     | -89.0266   | 680285.8938 | -14.7632  |
| -14.7931                |             |            |             |           |
| [14867]ENERGY: 14380000 | 3337.3204   | 5470.1410  | 5704.4409   |           |
| 340.8676                | -14329.5910 | -1812.5051 | 0.0000      | 0.0000    |
| 8177.9021               | 6888.5758   | 311.8366   | -1289.3263  | 6955.3202 |
| 310.9301                | -76.7763    | -92.6348   | 680285.8938 | -17.4277  |
| -17.4114                |             |            |             |           |
| [14917]ENERGY: 14390000 | 3425.8159   | 5577.8789  | 5711.3855   |           |
| 341.0304                | -14424.3142 | -1826.9020 | 0.0000      | 0.0000    |
| 8084.1211               | 6889.0156   | 308.2606   | -1195.1055  | 6954.7049 |
| 310.9980                | -26.7685    | -140.0087  | 680285.8938 | -15.0164  |
| -15.0212                |             |            |             |           |
| [14956]ENERGY: 14400000 | 3363.1284   | 5503.1525  | 5676.3457   |           |
| 343.9111                | -14406.8825 | -1782.8179 | 0.0000      | 0.0000    |
| 8193.2172               | 6890.0544   | 312.4206   | -1303.1627  | 6953.6864 |
| 311.0704                | 72.6926     | 63.5053    | 680285.8938 | -12.9863  |
| -12.9899                |             |            |             |           |
| [15006]ENERGY: 14410000 | 3272.5042   | 5603.1048  | 5705.5888   |           |
| 335.6835                | -14355.7055 | -1810.5880 | 0.0000      | 0.0000    |
| 8142.2460               | 6892.8338   | 310.4770   | -1249.4122  | 6955.5164 |
| 310.8170                | 55.5170     | -11.6734   | 680285.8938 | -10.9228  |
| -10.9008                |             |            |             |           |
| [15042]ENERGY: 14420000 | 3434.9040   | 5524.7520  | 5705.9540   |           |

## Supplementary Text 6

|                         |             |            |             |           |
|-------------------------|-------------|------------|-------------|-----------|
| 362.2257                | -14344.7203 | -1857.4918 | 0.0000      | 0.0000    |
| 8063.8799               | 6889.5036   | 307.4887   | -1174.3763  | 6955.2718 |
| 310.9076                | -191.3986   | -187.8507  | 680285.8938 | -15.4508  |
| -15.4668                |             |            |             |           |
| [15092]ENERGY: 14430000 | 3394.0941   | 5385.0773  | 5701.4763   |           |
| 369.2895                | -14350.6231 | -1757.6677 | 0.0000      | 0.0000    |
| 8148.8193               | 6890.4657   | 310.7276   | -1258.3536  | 6955.2292 |
| 310.8748                | -80.4737    | -82.8158   | 680285.8938 | -14.5045  |
| -14.5076                |             |            |             |           |
| [15128]ENERGY: 14440000 | 3402.5214   | 5467.8287  | 5705.3968   |           |
| 354.1320                | -14252.2871 | -1901.1628 | 0.0000      | 0.0000    |
| 8112.3365               | 6888.7654   | 309.3365   | -1223.5710  | 6955.6096 |
| 310.9200                | -136.6062   | -180.7085  | 680285.8938 | -17.9365  |
| -17.9404                |             |            |             |           |
| [15178]ENERGY: 14450000 | 3278.0507   | 5419.1365  | 5742.4224   |           |
| 334.0442                | -14298.8388 | -1816.1085 | 0.0000      | 0.0000    |
| 8227.4266               | 6886.1332   | 313.7250   | -1341.2935  | 6954.4487 |
| 310.7809                | 88.9553     | 90.8459    | 680285.8938 | -14.1592  |
| -14.1615                |             |            |             |           |
| [15214]ENERGY: 14460000 | 3354.5802   | 5534.9312  | 5735.3482   |           |
| 342.5345                | -14387.3644 | -1811.1969 | 0.0000      | 0.0000    |
| 8120.2026               | 6889.0354   | 309.6364   | -1231.1672  | 6954.8951 |
| 310.6752                | 80.7756     | 21.6557    | 680285.8938 | -21.7312  |
| -21.7213                |             |            |             |           |
| [15264]ENERGY: 14470000 | 3351.5758   | 5528.5521  | 5630.3002   |           |
| 353.9597                | -14340.9985 | -1749.5811 | 0.0000      | 0.0000    |
| 8118.7816               | 6892.5897   | 309.5822   | -1226.1919  | 6954.8191 |
| 310.8233                | -104.5056   | 2.5600     | 680285.8938 | -16.3602  |
| -16.3496                |             |            |             |           |
| [15300]ENERGY: 14480000 | 3261.9500   | 5523.2356  | 5681.5312   |           |
| 366.6831                | -14338.8094 | -1796.3245 | 0.0000      | 0.0000    |
| 8191.9413               | 6890.2072   | 312.3719   | -1301.7341  | 6956.4138 |
| 311.0377                | 93.5891     | 37.9875    | 680285.8938 | -13.7001  |
| -13.7022                |             |            |             |           |
| [15350]ENERGY: 14490000 | 3339.1252   | 5432.0158  | 5697.8421   |           |
| 367.4725                | -14259.6440 | -1837.8623 | 0.0000      | 0.0000    |
| 8153.2312               | 6892.1805   | 310.8959   | -1261.0508  | 6956.0669 |
| 310.8999                | -142.2408   | -158.9261  | 680285.8938 | -16.7653  |
| -16.7760                |             |            |             |           |
| [15389]ENERGY: 14500000 | 3314.2398   | 5539.4211  | 5736.1516   |           |
| 342.8189                | -14329.9357 | -1739.0359 | 0.0000      | 0.0000    |
| 8027.3340               | 6890.9939   | 306.0952   | -1136.3401  | 6955.7722 |
| 310.8467                | -107.1240   | -57.1215   | 680285.8938 | -14.8196  |
| -14.8064                |             |            |             |           |
| [15439]ENERGY: 14510000 | 3390.9741   | 5378.5105  | 5680.7955   |           |
| 349.5375                | -14225.7091 | -1793.1785 | 0.0000      | 0.0000    |
| 8113.8290               | 6894.7591   | 309.3934   | -1219.0699  | 6956.0656 |
| 310.7689                | 34.7783     | -44.6858   | 680285.8938 | -21.2725  |
| -21.2838                |             |            |             |           |
| [15475]ENERGY: 14520000 | 3388.4254   | 5543.8296  | 5716.3636   |           |
| 343.6428                | -14368.1056 | -1815.3824 | 0.0000      | 0.0000    |
| 8084.0335               | 6892.8068   | 308.2572   | -1191.2267  | 6955.2902 |
| 310.8355                | -137.4724   | -20.9902   | 680285.8938 | -18.3949  |
| -18.3996                |             |            |             |           |

## Supplementary Text 6

|                         |             |            |             |
|-------------------------|-------------|------------|-------------|
| [15525]ENERGY: 14530000 | 3279.5994   | 5558.8249  | 5711.6579   |
| 327.2094                | -14314.8947 | -1809.7240 | 0.0000      |
| 8140.2592               | 6892.9322   | 310.4012   | -1247.3271  |
| 310.9935                | 39.3175     | -6.5170    | 680285.8938 |
| -16.6424                |             |            | -16.6325    |
| [15561]ENERGY: 14540000 | 3306.5668   | 5599.6807  | 5643.2427   |
| 363.3235                | -14409.8327 | -1823.9618 | 0.0000      |
| 8209.9094               | 6888.9287   | 313.0571   | -1320.9808  |
| 311.0292                | -103.7366   | -129.3607  | 680285.8938 |
| -18.2760                |             |            | -18.2938    |
| [15611]ENERGY: 14550000 | 3307.7088   | 5521.3120  | 5755.9492   |
| 340.0942                | -14401.0248 | -1810.8608 | 0.0000      |
| 8176.9031               | 6890.0817   | 311.7985   | -1286.8214  |
| 311.0977                | -96.2460    | -0.3622    | 680285.8938 |
| -15.9872                |             |            | -15.9968    |
| [15647]ENERGY: 14560000 | 3250.2927   | 5536.3376  | 5678.8962   |
| 330.3540                | -14256.8866 | -1748.4125 | 0.0000      |
| 8103.3716               | 6893.9530   | 308.9946   | -1209.4186  |
| 311.1265                | 187.4563    | 131.0429   | 680285.8938 |
| -19.1084                |             |            | -19.0789    |
| [15697]ENERGY: 14570000 | 3307.9104   | 5522.8237  | 5670.0840   |
| 365.7589                | -14289.1530 | -1812.9335 | 0.0000      |
| 8128.3238               | 6892.8143   | 309.9461   | -1235.5096  |
| 311.1926                | 40.5167     | -53.4148   | 680285.8938 |
| -17.9236                |             |            | -17.9331    |
| [15733]ENERGY: 14580000 | 3360.9055   | 5391.9902  | 5728.3895   |
| 340.3394                | -14295.7429 | -1790.1238 | 0.0000      |
| 8154.6453               | 6890.4032   | 310.9498   | -1264.2421  |
| 311.0298                | 42.6098     | -34.1086   | 680285.8938 |
| -21.2377                |             |            | -21.2270    |
| [15783]ENERGY: 14590000 | 3327.2824   | 5504.9232  | 5681.3922   |
| 373.9671                | -14242.1144 | -1882.1941 | 0.0000      |
| 8129.6427               | 6892.8990   | 309.9964   | -1236.7437  |
| 310.8555                | 52.9678     | 8.1116     | 680285.8938 |
| -14.5550                |             |            | -14.5729    |
| [15822]ENERGY: 14600000 | 3273.9260   | 5528.5154  | 5690.0573   |
| 339.8233                | -14337.9207 | -1774.4438 | 0.0000      |
| 8173.7441               | 6893.7016   | 311.6780   | -1280.0425  |
| 311.0009                | 131.3740    | 104.5935   | 680285.8938 |
| -15.8711                |             |            | -15.8714    |
| [15872]ENERGY: 14610000 | 3345.0610   | 5494.9093  | 5707.0415   |
| 345.0634                | -14335.6882 | -1833.6944 | 0.0000      |
| 8166.2141               | 6888.9068   | 311.3909   | -1277.3073  |
| 310.9500                | 67.9059     | 50.4016    | 680285.8938 |
| -16.4126                |             |            | -16.4051    |
| [15908]ENERGY: 14620000 | 3383.3359   | 5493.1276  | 5615.4451   |
| 342.9862                | -14378.5653 | -1780.1564 | 0.0000      |
| 8216.5023               | 6892.6754   | 313.3085   | -1323.8269  |
| 310.9411                | 66.3380     | -63.8170   | 680285.8938 |
| -17.8718                |             |            | -17.8749    |
| [15958]ENERGY: 14630000 | 3292.5808   | 5490.8112  | 5724.8184   |
| 355.8048                | -14289.6615 | -1765.7081 | 0.0000      |
| 8087.2306               | 6895.8762   | 308.3791   | -1191.3544  |
| 311.0609                | 80.2274     | 3.3334     | 680285.8938 |
|                         |             |            | -12.9302    |

Supplementary Text 6

-12.9405  
 [15994]ENERGY: 14640000 3308.6342 5573.9774 5682.3817  
 356.6540 -14329.0285 -1811.7361 0.0000 0.0000  
 8117.0056 6897.8884 309.5145 -1219.1172 6958.6790  
 311.0005 66.2482 66.8309 680285.8938 -16.1420  
 -16.1109  
 [16044]ENERGY: 14650000 3322.8512 5458.3707 5735.1478  
 361.9018 -14335.0051 -1838.4664 0.0000 0.0000  
 8186.7465 6891.5466 312.1738 -1295.1999 6958.3400  
 311.1531 -51.2439 -84.5976 680285.8938 -18.1553  
 -18.1931  
 [16080]ENERGY: 14660000 3300.0017 5392.0296 5743.3999  
 341.5813 -14301.8645 -1774.7471 0.0000 0.0000  
 8192.3798 6892.7807 312.3887 -1299.5991 6957.4802  
 310.9613 106.7037 88.0140 680285.8938 -18.4537  
 -18.4300  
 [16130]ENERGY: 14670000 3367.7252 5396.5477 5770.6866  
 335.6524 -14433.2405 -1737.1676 0.0000 0.0000  
 8195.2035 6895.4073 312.4963 -1299.7962 6957.2737  
 310.9536 186.5532 93.0792 680285.8938 -16.9878  
 -17.0058  
 [16166]ENERGY: 14680000 3399.8440 5458.6024 5683.6476  
 334.3034 -14318.1866 -1792.3294 0.0000 0.0000  
 8128.0401 6893.9214 309.9353 -1234.1186 6958.7763  
 311.0217 -58.8131 -62.7282 680285.8938 -16.7005  
 -16.6764  
 [16216]ENERGY: 14690000 3294.0271 5545.0576 5692.2604  
 329.4483 -14416.7861 -1772.8482 0.0000 0.0000  
 8217.6831 6888.8422 313.3535 -1328.8410 6958.4049  
 311.0655 61.4396 -19.3123 680285.8938 -12.9560  
 -12.9582  
 [16255]ENERGY: 14700000 3274.1979 5533.9195 5733.0738  
 345.9001 -14382.7605 -1726.1960 0.0000 0.0000  
 8116.2194 6894.3543 309.4845 -1221.8651 6959.2636  
 311.0096 164.5037 87.4829 680285.8938 -16.4328  
 -16.4414  
 [16305]ENERGY: 14710000 3347.1205 5448.7469 5731.4862  
 359.7345 -14287.5869 -1859.2746 0.0000 0.0000  
 8155.9387 6896.1654 310.9991 -1259.7734 6959.6124  
 311.0596 -128.4416 -193.3489 680285.8938 -16.5331  
 -16.5426  
 [16341]ENERGY: 14720000 3302.6438 5474.2428 5741.4604  
 332.5659 -14304.6609 -1795.9160 0.0000 0.0000  
 8146.0682 6896.4042 310.6227 -1249.6641 6959.2549  
 311.1625 -138.9990 -44.8907 680285.8938 -18.9638  
 -18.9460  
 [16391]ENERGY: 14730000 3333.0701 5537.4907 5774.3918  
 343.5856 -14427.1510 -1815.3719 0.0000 0.0000  
 8145.6014 6891.6167 310.6049 -1253.9847 6960.0009  
 311.2559 -106.2842 -98.5848 680285.8938 -9.2537  
 -9.2786  
 [16427]ENERGY: 14740000 3317.7436 5444.2319 5719.6950  
 346.5942 -14373.7742 -1721.5355 0.0000 0.0000  
 8161.1171 6894.0722 311.1966 -1267.0449 6959.5513



## Supplementary Text 6

|                         |             |            |             |           |
|-------------------------|-------------|------------|-------------|-----------|
| 310.9875                | 78.2470     | 32.5448    | 680285.8938 | -13.0137  |
| -13.0063                |             |            |             |           |
| [16477]ENERGY: 14750000 | 3339.3501   | 5505.2533  | 5704.6221   |           |
| 354.4233                | -14344.5222 | -1875.8123 | 0.0000      | 0.0000    |
| 8212.7360               | 6896.0504   | 313.1649   | -1316.6856  | 6960.7169 |
| 310.9103                | 37.5258     | 16.5088    | 680285.8938 | -14.0284  |
| -14.0395                |             |            |             |           |
| [16513]ENERGY: 14760000 | 3294.5018   | 5530.5921  | 5681.1211   |           |
| 349.9426                | -14276.6587 | -1888.2231 | 0.0000      | 0.0000    |
| 8202.4787               | 6893.7546   | 312.7737   | -1308.7241  | 6960.8796 |
| 310.8811                | 63.9521     | 35.9142    | 680285.8938 | -13.6209  |
| -13.6017                |             |            |             |           |
| [16563]ENERGY: 14770000 | 3430.5310   | 5519.1837  | 5721.5038   |           |
| 314.8469                | -14364.5909 | -1794.0923 | 0.0000      | 0.0000    |
| 8070.6203               | 6898.0025   | 307.7458   | -1172.6178  | 6960.4986 |
| 310.9883                | -12.3079    | -46.7572   | 680285.8938 | -15.1636  |
| -15.1732                |             |            |             |           |
| [16599]ENERGY: 14780000 | 3327.9438   | 5535.4689  | 5794.6668   |           |
| 329.2756                | -14368.7641 | -1777.2482 | 0.0000      | 0.0000    |
| 8057.1875               | 6898.5304   | 307.2336   | -1158.6572  | 6962.1732 |
| 310.8062                | -4.8269     | -61.8536   | 680285.8938 | -16.0590  |
| -16.0527                |             |            |             |           |
| [16649]ENERGY: 14790000 | 3350.1036   | 5556.9578  | 5701.5144   |           |
| 341.7119                | -14277.8595 | -1830.0835 | 0.0000      | 0.0000    |
| 8057.3504               | 6899.6951   | 307.2398   | -1157.6553  | 6962.0863 |
| 310.6741                | -4.3496     | -64.9356   | 680285.8938 | -11.7638  |
| -11.7610                |             |            |             |           |
| [16688]ENERGY: 14800000 | 3351.3642   | 5433.3961  | 5675.7979   |           |
| 352.0926                | -14276.1251 | -1835.2112 | 0.0000      | 0.0000    |
| 8195.2511               | 6896.5657   | 312.4981   | -1298.6855  | 6961.7521 |
| 310.8067                | 61.2250     | 25.8846    | 680285.8938 | -13.6707  |
| -13.6574                |             |            |             |           |
| [16738]ENERGY: 14810000 | 3328.1055   | 5532.8547  | 5678.3667   |           |
| 339.0474                | -14348.4889 | -1751.9011 | 0.0000      | 0.0000    |
| 8120.8650               | 6898.8493   | 309.6617   | -1222.0157  | 6962.5406 |
| 310.7180                | 43.6502     | 36.2376    | 680285.8938 | -15.9540  |
| -15.9473                |             |            |             |           |
| [16774]ENERGY: 14820000 | 3274.3949   | 5548.1372  | 5749.9422   |           |
| 342.1550                | -14372.1754 | -1769.6611 | 0.0000      | 0.0000    |
| 8124.3338               | 6897.1266   | 309.7939   | -1227.2072  | 6962.8915 |
| 310.8287                | 18.4366     | 0.3734     | 680285.8938 | -13.7527  |
| -13.7806                |             |            |             |           |
| [16824]ENERGY: 14830000 | 3323.0137   | 5519.8400  | 5727.2249   |           |
| 328.7709                | -14354.6846 | -1809.7290 | 0.0000      | 0.0000    |
| 8162.1155               | 6896.5515   | 311.2346   | -1265.5641  | 6962.2690 |
| 310.8290                | 97.3886     | 27.3664    | 680285.8938 | -10.0330  |
| -10.0478                |             |            |             |           |
| [16860]ENERGY: 14840000 | 3265.0636   | 5485.7973  | 5716.2594   |           |
| 373.3371                | -14280.8745 | -1840.6392 | 0.0000      | 0.0000    |
| 8179.0548               | 6897.9985   | 311.8805   | -1281.0563  | 6963.9486 |
| 311.1134                | 99.3952     | -52.1266   | 680285.8938 | -10.1597  |
| -10.1272                |             |            |             |           |
| [16910]ENERGY: 14850000 | 3367.9824   | 5494.0749  | 5701.3340   |           |
| 339.1194                | -14433.1219 | -1830.1013 | 0.0000      | 0.0000    |

## Supplementary Text 6

|                         |             |            |             |           |
|-------------------------|-------------|------------|-------------|-----------|
| 8252.1275               | 6891.4149   | 314.6669   | -1360.7126  | 6963.8710 |
| 311.0692                | -16.7271    | -89.8419   | 680285.8938 | -15.5123  |
| -15.5504                |             |            |             |           |
| [16946]ENERGY: 14860000 | 3332.3434   | 5507.7333  | 5707.9989   |           |
| 359.8569                | -14421.9958 | -1784.1183 | 0.0000      | 0.0000    |
| 8198.3622               | 6900.1807   | 312.6168   | -1298.1815  | 6964.5125 |
| 311.0809                | -67.0825    | -95.8110   | 680285.8938 | -7.1460   |
| -7.1048                 |             |            |             |           |
| [16996]ENERGY: 14870000 | 3296.5501   | 5466.1617  | 5718.1845   |           |
| 329.0585                | -14297.5819 | -1775.3841 | 0.0000      | 0.0000    |
| 8163.3231               | 6900.3121   | 311.2807   | -1263.0111  | 6964.7833 |
| 310.9299                | 67.9354     | 101.6742   | 680285.8938 | -12.4457  |
| -12.4407                |             |            |             |           |
| [17032]ENERGY: 14880000 | 3330.0383   | 5489.4256  | 5729.1112   |           |
| 345.6180                | -14375.8567 | -1791.3105 | 0.0000      | 0.0000    |
| 8173.8201               | 6900.8461   | 311.6809   | -1272.9740  | 6965.7825 |
| 311.1807                | 150.1112    | 4.6083     | 680285.8938 | -14.3917  |
| -14.4177                |             |            |             |           |
| [17082]ENERGY: 14890000 | 3314.8595   | 5506.8896  | 5701.6345   |           |
| 339.2367                | -14338.1932 | -1773.7259 | 0.0000      | 0.0000    |
| 8148.1412               | 6898.8422   | 310.7018   | -1249.2989  | 6966.1490 |
| 311.0621                | 20.5063     | -33.6073   | 680285.8938 | -11.1593  |
| -11.1380                |             |            |             |           |
| [17121]ENERGY: 14900000 | 3386.2903   | 5536.0710  | 5709.0624   |           |
| 346.6833                | -14420.0415 | -1792.2785 | 0.0000      | 0.0000    |
| 8132.3518               | 6898.1388   | 310.0997   | -1234.2130  | 6965.8531 |
| 311.2030                | -176.1787   | -122.6371  | 680285.8938 | -13.7226  |
| -13.7325                |             |            |             |           |
| [17171]ENERGY: 14910000 | 3353.5160   | 5536.2354  | 5724.6530   |           |
| 329.4025                | -14306.9858 | -1794.1238 | 0.0000      | 0.0000    |
| 8060.1894               | 6902.8867   | 307.3480   | -1157.3028  | 6966.4304 |
| 311.0699                | 91.1127     | 22.2376    | 680285.8938 | -9.5739   |
| -9.5773                 |             |            |             |           |
| [17207]ENERGY: 14920000 | 3361.6311   | 5529.7444  | 5724.4373   |           |
| 357.1146                | -14375.2163 | -1801.2443 | 0.0000      | 0.0000    |
| 8105.3922               | 6901.8590   | 309.0717   | -1203.5332  | 6966.5911 |
| 311.0053                | -68.7329    | -97.3382   | 680285.8938 | -11.7127  |
| -11.7164                |             |            |             |           |
| [17257]ENERGY: 14930000 | 3364.5912   | 5481.1095  | 5702.5225   |           |
| 338.4264                | -14367.8281 | -1784.9920 | 0.0000      | 0.0000    |
| 8166.6657               | 6900.4953   | 311.4081   | -1266.1704  | 6967.3688 |
| 311.0887                | 29.8009     | 32.8535    | 680285.8938 | -12.3413  |
| -12.3288                |             |            |             |           |
| [17293]ENERGY: 14940000 | 3313.4069   | 5420.8875  | 5669.9693   |           |
| 366.3772                | -14336.2790 | -1728.9923 | 0.0000      | 0.0000    |
| 8197.2631               | 6902.6327   | 312.5749   | -1294.6304  | 6967.7818 |
| 311.1220                | 34.5840     | 49.6492    | 680285.8938 | -10.1420  |
| -10.1601                |             |            |             |           |
| [17343]ENERGY: 14950000 | 3323.4848   | 5549.4134  | 5668.5171   |           |
| 354.0375                | -14285.6838 | -1867.1656 | 0.0000      | 0.0000    |
| 8160.1193               | 6902.7227   | 311.1585   | -1257.3966  | 6969.0789 |
| 311.1269                | -16.5909    | -57.9641   | 680285.8938 | -11.3479  |
| -11.3462                |             |            |             |           |
| [17379]ENERGY: 14960000 | 3388.0347   | 5453.0262  | 5666.8216   |           |

## Supplementary Text 6

|                         |             |            |             |           |
|-------------------------|-------------|------------|-------------|-----------|
| 347.0746                | -14297.3353 | -1816.8211 | 0.0000      | 0.0000    |
| 8162.2763               | 6903.0770   | 311.2408   | -1259.1993  | 6969.1598 |
| 311.1725                | 106.2659    | 87.5587    | 680285.8938 | -11.6984  |
| -11.7074                |             |            |             |           |
| [17429]ENERGY: 14970000 | 3321.3679   | 5491.9509  | 5666.7264   |           |
| 343.1393                | -14262.7040 | -1873.1254 | 0.0000      | 0.0000    |
| 8220.4161               | 6907.7713   | 313.4577   | -1312.6448  | 6969.7168 |
| 311.2892                | -76.0329    | -97.9157   | 680285.8938 | -11.1190  |
| -11.0958                |             |            |             |           |
| [17465]ENERGY: 14980000 | 3321.2384   | 5584.0299  | 5714.4511   |           |
| 356.7376                | -14369.1157 | -1841.1240 | 0.0000      | 0.0000    |
| 8136.3681               | 6902.5854   | 310.2528   | -1233.7826  | 6969.2231 |
| 311.4300                | -76.9367    | -62.6620   | 680285.8938 | -10.2715  |
| -10.2844                |             |            |             |           |
| [17515]ENERGY: 14990000 | 3374.3861   | 5484.0830  | 5678.9407   |           |
| 352.1496                | -14349.3259 | -1842.4330 | 0.0000      | 0.0000    |
| 8204.1398               | 6901.9403   | 312.8371   | -1302.1995  | 6969.7176 |
| 311.2207                | -103.2006   | -80.8255   | 680285.8938 | -13.7244  |
| -13.7167                |             |            |             |           |
| [17554]ENERGY: 15000000 | 3360.9263   | 5506.2267  | 5670.4904   |           |
| 361.7056                | -14362.3494 | -1816.1096 | 0.0000      | 0.0000    |
| 8183.5401               | 6904.4302   | 312.0516   | -1279.1099  | 6970.2793 |
| 311.2416                | -112.6731   | -125.2698  | 680285.8938 | -11.7115  |
| -11.7102                |             |            |             |           |
| [17604]ENERGY: 15010000 | 3332.5659   | 5422.5633  | 5735.7666   |           |
| 334.9071                | -14301.7081 | -1824.4681 | 0.0000      | 0.0000    |
| 8203.9027               | 6903.5294   | 312.8280   | -1300.3733  | 6970.9410 |
| 311.2514                | 51.1747     | 4.9681     | 680285.8938 | -10.6155  |
| -10.6133                |             |            |             |           |
| [17640]ENERGY: 15020000 | 3321.4393   | 5410.6881  | 5693.2325   |           |
| 360.7518                | -14238.2462 | -1792.6380 | 0.0000      | 0.0000    |
| 8148.7277               | 6903.9551   | 310.7241   | -1244.7726  | 6971.4638 |
| 311.3114                | 27.1645     | 64.8671    | 680285.8938 | -14.3919  |
| -14.3995                |             |            |             |           |
| [17690]ENERGY: 15030000 | 3367.2743   | 5539.2714  | 5690.0858   |           |
| 324.5299                | -14362.0824 | -1796.2337 | 0.0000      | 0.0000    |
| 8140.9572               | 6903.8025   | 310.4278   | -1237.1547  | 6969.6416 |
| 311.2347                | -11.3313    | 74.0844    | 680285.8938 | -16.7654  |
| -16.7599                |             |            |             |           |
| [17726]ENERGY: 15040000 | 3282.6273   | 5532.9628  | 5695.7759   |           |
| 350.9917                | -14304.4963 | -1814.0464 | 0.0000      | 0.0000    |
| 8160.3210               | 6904.1360   | 311.1662   | -1256.1849  | 6969.8110 |
| 311.1001                | 105.8152    | 69.0633    | 680285.8938 | -17.1520  |
| -17.1684                |             |            |             |           |
| [17776]ENERGY: 15050000 | 3298.0400   | 5450.4485  | 5686.0101   |           |
| 339.4018                | -14244.0846 | -1814.6461 | 0.0000      | 0.0000    |
| 8189.3473               | 6904.5170   | 312.2730   | -1284.8303  | 6969.9351 |
| 311.1245                | 127.6985    | 120.9014   | 680285.8938 | -13.0401  |
| -13.0182                |             |            |             |           |
| [17812]ENERGY: 15060000 | 3371.6095   | 5576.8196  | 5690.2322   |           |
| 345.6912                | -14387.2325 | -1794.3439 | 0.0000      | 0.0000    |
| 8102.5112               | 6905.2874   | 308.9618   | -1197.2239  | 6970.1548 |
| 311.0832                | -4.8221     | 38.7750    | 680285.8938 | -18.7777  |
| -18.7779                |             |            |             |           |

## Supplementary Text 6

|                         |             |            |             |
|-------------------------|-------------|------------|-------------|
| [17862]ENERGY: 15070000 | 3268.2581   | 5572.2287  | 5667.5083   |
| 344.4573                | -14316.1076 | -1821.3430 | 0.0000      |
| 8187.2305               | 6902.2323   | 312.1923   | -1284.9982  |
| 311.0452                | 18.7048     | -19.5758   | 680285.8938 |
| -14.6839                |             |            | -14.6686    |
| [17898]ENERGY: 15080000 | 3348.0980   | 5504.6814  | 5666.3309   |
| 341.2105                | -14306.5932 | -1793.1758 | 0.0000      |
| 8143.2074               | 6903.7591   | 310.5136   | -1239.4483  |
| 311.3302                | 145.2675    | 84.9785    | 680285.8938 |
| -15.3663                |             |            | -15.3561    |
| [17948]ENERGY: 15090000 | 3308.4912   | 5504.2974  | 5698.5164   |
| 343.4973                | -14261.8407 | -1850.1423 | 0.0000      |
| 8162.2838               | 6905.1030   | 311.2410   | -1257.1808  |
| 311.1763                | -81.7453    | -118.3345  | 680285.8938 |
| -13.2882                |             |            | -13.3028    |
| [17987]ENERGY: 15100000 | 3327.9420   | 5465.2894  | 5670.4944   |
| 343.4007                | -14299.5117 | -1819.2221 | 0.0000      |
| 8217.6917               | 6906.0843   | 313.3538   | -1311.6074  |
| 311.2410                | 155.3247    | 30.2293    | 680285.8938 |
| -9.8753                 |             |            | -9.8755     |
| [18037]ENERGY: 15110000 | 3242.7533   | 5465.1888  | 5673.1212   |
| 335.1441                | -14293.4723 | -1783.9102 | 0.0000      |
| 8262.4791               | 6901.3039   | 315.0616   | -1361.1751  |
| 311.2572                | -55.4436    | -34.4006   | 680285.8938 |
| -14.8987                |             |            | -14.9044    |
| [18073]ENERGY: 15120000 | 3403.0030   | 5532.7095  | 5712.8912   |
| 352.6075                | -14368.0937 | -1837.8211 | 0.0000      |
| 8113.5410               | 6908.8372   | 309.3824   | -1204.7037  |
| 311.1491                | -82.3137    | -82.8138   | 680285.8938 |
| -11.0904                |             |            | -11.0868    |
| [18123]ENERGY: 15130000 | 3356.0054   | 5519.0547  | 5741.0368   |
| 352.3159                | -14428.4073 | -1783.7582 | 0.0000      |
| 8148.1807               | 6904.4280   | 310.7033   | -1243.7527  |
| 311.3064                | -18.8149    | 28.6187    | 680285.8938 |
| -12.5616                |             |            | -12.5801    |
| [18159]ENERGY: 15140000 | 3313.5548   | 5548.1030  | 5708.0158   |
| 327.4465                | -14308.8437 | -1802.9989 | 0.0000      |
| 8117.8882               | 6903.1657   | 309.5482   | -1214.7225  |
| 311.3429                | 112.4427    | 158.1238   | 680285.8938 |
| -8.7591                 |             |            | -8.7525     |
| [18209]ENERGY: 15150000 | 3275.3545   | 5400.7788  | 5745.6343   |
| 326.5157                | -14263.9059 | -1814.4779 | 0.0000      |
| 8235.2267               | 6905.1261   | 314.0225   | -1330.1006  |
| 311.2934                | 81.9636     | 57.4514    | 680285.8938 |
| -10.9666                |             |            | -10.9520    |
| [18245]ENERGY: 15160000 | 3328.1870   | 5482.9453  | 5709.6467   |
| 350.7966                | -14384.5949 | -1768.9061 | 0.0000      |
| 8187.6893               | 6905.7639   | 312.2098   | -1281.9254  |
| 311.3757                | -64.7669    | -23.8697   | 680285.8938 |
| -13.1750                |             |            | -13.1890    |
| [18295]ENERGY: 15170000 | 3354.2156   | 5479.1975  | 5677.8062   |
| 328.7103                | -14464.5083 | -1704.6104 | 0.0000      |
| 8236.5549               | 6907.3658   | 314.0731   | -1329.1891  |
| 311.5049                | -27.6299    | -12.9902   | 680285.8938 |
|                         |             |            | -8.8954     |

## Supplementary Text 6

-8.8825

|                         |             |            |             |
|-------------------------|-------------|------------|-------------|
| [18331]ENERGY: 15180000 | 3416.4547   | 5537.7346  | 5695.4336   |
| 320.0222                | -14339.3542 | -1829.1396 | 0.0000      |
| 8111.4230               | 6912.5742   | 309.3016   | -1198.8488  |
| 311.3311                | -146.6626   | -92.1103   | 680285.8938 |

-8.6079

|                         |             |            |             |
|-------------------------|-------------|------------|-------------|
| [18381]ENERGY: 15190000 | 3387.6812   | 5481.9116  | 5719.5709   |
| 334.9938                | -14404.3227 | -1764.8414 | 0.0000      |
| 8154.4162               | 6909.4095   | 310.9410   | -1245.0066  |
| 311.4581                | 133.3221    | 55.8531    | 680285.8938 |

-13.8778

|                         |             |            |             |
|-------------------------|-------------|------------|-------------|
| [18420]ENERGY: 15200000 | 3402.3593   | 5474.2453  | 5730.7469   |
| 331.8260                | -14311.4593 | -1833.0494 | 0.0000      |
| 8112.4565               | 6907.1253   | 309.3410   | -1205.3312  |
| 311.4480                | -19.4056    | -11.5905   | 680285.8938 |

-11.5919

|                         |             |            |             |
|-------------------------|-------------|------------|-------------|
| [18470]ENERGY: 15210000 | 3350.5800   | 5411.5306  | 5699.2260   |
| 344.5725                | -14358.8254 | -1740.1126 | 0.0000      |
| 8203.3020               | 6910.2731   | 312.8051   | -1293.0289  |
| 311.3575                | 213.5304    | 181.0617   | 680285.8938 |

-11.3457

|                         |             |            |             |
|-------------------------|-------------|------------|-------------|
| [18506]ENERGY: 15220000 | 3255.5978   | 5613.0743  | 5700.0610   |
| 339.7116                | -14364.1853 | -1802.8227 | 0.0000      |
| 8168.5568               | 6909.9935   | 311.4802   | -1258.5633  |
| 311.6951                | 145.8573    | 82.3529    | 680285.8938 |

-13.0288

|                         |             |            |             |
|-------------------------|-------------|------------|-------------|
| [18556]ENERGY: 15230000 | 3349.5672   | 5473.8197  | 5701.4752   |
| 364.3887                | -14313.0569 | -1786.1954 | 0.0000      |
| 8120.0336               | 6910.0322   | 309.6300   | -1210.0015  |
| 311.3979                | -22.9650    | 22.5380    | 680285.8938 |

-14.1553

|                         |             |            |             |
|-------------------------|-------------|------------|-------------|
| [18592]ENERGY: 15240000 | 3458.0136   | 5399.6633  | 5694.6239   |
| 336.5888                | -14303.9593 | -1807.1160 | 0.0000      |
| 8130.0820               | 6907.8962   | 310.0131   | -1222.1857  |
| 311.3502                | -162.8796   | -168.6449  | 680285.8938 |

-13.6684

|                         |             |            |             |
|-------------------------|-------------|------------|-------------|
| [18642]ENERGY: 15250000 | 3277.5845   | 5515.5869  | 5711.5958   |
| 333.6069                | -14263.6973 | -1819.6250 | 0.0000      |
| 8154.1953               | 6909.2470   | 310.9326   | -1244.9483  |
| 311.2186                | -69.2591    | -58.9255   | 680285.8938 |

-16.3671

|                         |             |            |             |
|-------------------------|-------------|------------|-------------|
| [18678]ENERGY: 15260000 | 3305.9244   | 5443.2822  | 5717.3165   |
| 345.3966                | -14267.0889 | -1803.4670 | 0.0000      |
| 8169.1740               | 6910.5378   | 311.5038   | -1258.6362  |
| 311.4612                | 88.9323     | -9.0043    | 680285.8938 |

-14.8128

|                         |             |            |             |
|-------------------------|-------------|------------|-------------|
| [18728]ENERGY: 15270000 | 3354.3174   | 5480.1311  | 5666.0756   |
| 356.5074                | -14289.0661 | -1854.2344 | 0.0000      |
| 8193.2538               | 6906.9847   | 312.4220   | -1286.2690  |
| 311.3142                | -127.8218   | -81.8906   | 680285.8938 |

-17.9320

|                         |             |            |            |
|-------------------------|-------------|------------|------------|
| [18764]ENERGY: 15280000 | 3312.9967   | 5543.5274  | 5686.7491  |
| 339.3314                | -14313.4916 | -1846.7907 | 0.0000     |
| 8186.4313               | 6908.7535   | 312.1618   | -1277.6778 |

## Supplementary Text 6

|                         |             |            |             |           |
|-------------------------|-------------|------------|-------------|-----------|
| 311.3960                | -106.8707   | -127.4218  | 680285.8938 | -14.3672  |
| -14.3499                |             |            |             |           |
| [18814]ENERGY: 15290000 | 3352.5711   | 5436.7598  | 5731.2731   |           |
| 318.5696                | -14337.1643 | -1766.3058 | 0.0000      | 0.0000    |
| 8173.2191               | 6908.9226   | 311.6580   | -1264.2965  | 6975.5218 |
| 311.4536                | 47.2034     | -49.1901   | 680285.8938 | -14.3965  |
| -14.4079                |             |            |             |           |
| [18853]ENERGY: 15300000 | 3451.1898   | 5509.7730  | 5694.2616   |           |
| 325.4560                | -14409.4850 | -1804.4310 | 0.0000      | 0.0000    |
| 8146.7377               | 6913.5021   | 310.6482   | -1233.2355  | 6975.2218 |
| 311.2546                | 12.7314     | 52.3719    | 680285.8938 | -14.0150  |
| -14.0005                |             |            |             |           |
| [18903]ENERGY: 15310000 | 3373.9509   | 5533.7244  | 5690.2094   |           |
| 349.5886                | -14330.8140 | -1817.3381 | 0.0000      | 0.0000    |
| 8110.5887               | 6909.9100   | 309.2698   | -1200.6787  | 6975.4903 |
| 311.1849                | 5.4129      | -26.4324   | 680285.8938 | -11.2420  |
| -11.2612                |             |            |             |           |
| [18939]ENERGY: 15320000 | 3337.5106   | 5551.2425  | 5661.1322   |           |
| 313.1386                | -14298.6890 | -1797.7506 | 0.0000      | 0.0000    |
| 8143.0417               | 6909.6261   | 310.5073   | -1233.4156  | 6976.5558 |
| 311.0742                | 69.0267     | 47.2327    | 680285.8938 | -16.1453  |
| -16.1414                |             |            |             |           |
| [18989]ENERGY: 15330000 | 3377.7927   | 5469.7834  | 5714.7847   |           |
| 326.5815                | -14392.5905 | -1776.0129 | 0.0000      | 0.0000    |
| 8188.7048               | 6909.0437   | 312.2485   | -1279.6611  | 6975.6695 |
| 311.0461                | -4.1181     | -65.3720   | 680285.8938 | -18.6445  |
| -18.6484                |             |            |             |           |
| [19025]ENERGY: 15340000 | 3421.1024   | 5491.6801  | 5664.1984   |           |
| 334.9431                | -14341.4866 | -1873.2066 | 0.0000      | 0.0000    |
| 8209.8527               | 6907.0835   | 313.0549   | -1302.7692  | 6975.4221 |
| 311.2091                | -21.5340    | -37.5203   | 680285.8938 | -12.7206  |
| -12.7267                |             |            |             |           |
| [19075]ENERGY: 15350000 | 3281.9073   | 5514.3946  | 5658.2882   |           |
| 342.8395                | -14339.1620 | -1769.4308 | 0.0000      | 0.0000    |
| 8217.7908               | 6906.6275   | 313.3576   | -1311.1633  | 6974.3812 |
| 311.1805                | 49.0376     | -66.8214   | 680285.8938 | -13.9597  |
| -13.9528                |             |            |             |           |
| [19111]ENERGY: 15360000 | 3376.5323   | 5549.9547  | 5652.2959   |           |
| 342.9732                | -14394.0968 | -1783.5487 | 0.0000      | 0.0000    |
| 8166.2100               | 6910.3205   | 311.3908   | -1255.8894  | 6974.9459 |
| 311.3612                | -134.6458   | -83.8625   | 680285.8938 | -11.8192  |
| -11.7919                |             |            |             |           |
| [19161]ENERGY: 15370000 | 3373.5381   | 5477.7435  | 5687.5076   |           |
| 339.7296                | -14295.7395 | -1792.3973 | 0.0000      | 0.0000    |
| 8124.0653               | 6914.4472   | 309.7837   | -1209.6180  | 6974.9772 |
| 311.3539                | 183.4511    | 68.4806    | 680285.8938 | -12.7084  |
| -12.7307                |             |            |             |           |
| [19197]ENERGY: 15380000 | 3351.7296   | 5532.7107  | 5680.5688   |           |
| 348.1871                | -14383.4333 | -1790.6699 | 0.0000      | 0.0000    |
| 8168.4363               | 6907.5293   | 311.4757   | -1260.9070  | 6974.8522 |
| 311.4930                | -16.4382    | -20.8180   | 680285.8938 | -11.0284  |
| -11.0085                |             |            |             |           |
| [19247]ENERGY: 15390000 | 3343.8281   | 5476.6517  | 5683.9160   |           |
| 346.5171                | -14268.7185 | -1815.9839 | 0.0000      | 0.0000    |

## Supplementary Text 6

|                         |             |            |             |           |
|-------------------------|-------------|------------|-------------|-----------|
| 8144.8941               | 6911.1047   | 310.5779   | -1233.7894  | 6974.5830 |
| 311.3059                | -93.6940    | -121.3920  | 680285.8938 | -9.3692   |
| -9.3721                 |             |            |             |           |
| [19286]ENERGY: 15400000 | 3325.4173   | 5403.8081  | 5727.5418   |           |
| 357.1958                | -14374.0208 | -1696.9245 | 0.0000      | 0.0000    |
| 8165.0681               | 6908.0858   | 311.3472   | -1256.9823  | 6974.7452 |
| 311.2431                | 163.3052    | 112.0061   | 680285.8938 | -10.8255  |
| -10.8382                |             |            |             |           |
| [19336]ENERGY: 15410000 | 3287.5282   | 5434.0781  | 5752.0532   |           |
| 321.4223                | -14297.7580 | -1817.6596 | 0.0000      | 0.0000    |
| 8225.5188               | 6905.1830   | 313.6523   | -1320.3358  | 6974.6546 |
| 311.2727                | 2.9766      | 74.4863    | 680285.8938 | -10.0699  |
| -10.0670                |             |            |             |           |
| [19372]ENERGY: 15420000 | 3319.8873   | 5639.7768  | 5642.1188   |           |
| 340.4358                | -14394.8488 | -1740.7202 | 0.0000      | 0.0000    |
| 8104.0536               | 6910.7033   | 309.0206   | -1193.3503  | 6974.3319 |
| 311.0677                | -12.5185    | -59.8355   | 680285.8938 | -14.0355  |
| -14.0448                |             |            |             |           |
| [19422]ENERGY: 15430000 | 3335.2058   | 5536.4353  | 5698.7274   |           |
| 340.7646                | -14405.8855 | -1713.9488 | 0.0000      | 0.0000    |
| 8118.6389               | 6909.9377   | 309.5768   | -1208.7012  | 6974.4495 |
| 311.1645                | 73.5205     | 110.9538   | 680285.8938 | -8.5119   |
| -8.5053                 |             |            |             |           |
| [19458]ENERGY: 15440000 | 3326.9084   | 5544.8850  | 5709.0704   |           |
| 346.3987                | -14342.7746 | -1818.6429 | 0.0000      | 0.0000    |
| 8144.3956               | 6910.2406   | 310.5589   | -1234.1550  | 6974.9838 |
| 311.1919                | 4.0974      | -11.5387   | 680285.8938 | -15.8883  |
| -15.8865                |             |            |             |           |
| [19508]ENERGY: 15450000 | 3242.8472   | 5490.1145  | 5675.8284   |           |
| 367.9480                | -14341.9389 | -1723.8541 | 0.0000      | 0.0000    |
| 8198.1067               | 6909.0520   | 312.6070   | -1289.0548  | 6974.9543 |
| 311.0971                | 118.9397    | 102.4855   | 680285.8938 | -8.1730   |
| -8.1731                 |             |            |             |           |
| [19544]ENERGY: 15460000 | 3303.7206   | 5499.9618  | 5695.6437   |           |
| 327.0175                | -14235.5356 | -1753.2503 | 0.0000      | 0.0000    |
| 8072.1686               | 6909.7262   | 307.8048   | -1162.4423  | 6976.2800 |
| 311.0197                | -76.9779    | -65.0171   | 680285.8938 | -8.4429   |
| -8.4400                 |             |            |             |           |
| [19594]ENERGY: 15470000 | 3384.4839   | 5436.7534  | 5674.6163   |           |
| 347.7226                | -14274.0415 | -1743.2079 | 0.0000      | 0.0000    |
| 8088.5191               | 6914.8460   | 308.4283   | -1173.6731  | 6978.2028 |
| 310.9213                | 88.9934     | 10.7637    | 680285.8938 | -13.7788  |
| -13.7820                |             |            |             |           |
| [19630]ENERGY: 15480000 | 3348.7992   | 5528.1359  | 5672.3223   |           |
| 347.4103                | -14285.3899 | -1815.4804 | 0.0000      | 0.0000    |
| 8118.2417               | 6914.0391   | 309.5616   | -1204.2026  | 6979.5103 |
| 311.3281                | -219.3867   | -181.4077  | 680285.8938 | -12.8819  |
| -12.8749                |             |            |             |           |
| [19680]ENERGY: 15490000 | 3327.5732   | 5455.2179  | 5715.8539   |           |
| 341.5005                | -14310.7623 | -1725.3112 | 0.0000      | 0.0000    |
| 8108.8346               | 6912.9065   | 309.2029   | -1195.9281  | 6978.5726 |
| 311.2413                | 67.4606     | 122.8105   | 680285.8938 | -12.7197  |
| -12.7344                |             |            |             |           |
| [19719]ENERGY: 15500000 | 3378.0784   | 5445.7363  | 5676.9294   |           |

## Supplementary Text 6

|                         |             |            |             |           |
|-------------------------|-------------|------------|-------------|-----------|
| 355.9122                | -14222.4633 | -1835.7520 | 0.0000      | 0.0000    |
| 8117.2980               | 6915.7390   | 309.5257   | -1201.5590  | 6979.3159 |
| 311.2698                | 91.3953     | 20.4220    | 680285.8938 | -9.6933   |
| -9.7017                 |             |            |             |           |
| [19769]ENERGY: 15510000 | 3421.3441   | 5503.2891  | 5737.1328   |           |
| 366.1034                | -14302.8699 | -1848.8195 | 0.0000      | 0.0000    |
| 8041.7421               | 6917.9221   | 306.6446   | -1123.8200  | 6979.4657 |
| 311.4077                | -20.2592    | -7.6121    | 680285.8938 | -11.2855  |
| -11.2731                |             |            |             |           |
| [19805]ENERGY: 15520000 | 3388.3616   | 5481.1679  | 5698.2334   |           |
| 352.4140                | -14326.7148 | -1853.1497 | 0.0000      | 0.0000    |
| 8175.8009               | 6916.1133   | 311.7565   | -1259.6875  | 6978.3850 |
| 311.4368                | -140.0083   | -120.8838  | 680285.8938 | -12.7563  |
| -12.7463                |             |            |             |           |
| [19855]ENERGY: 15530000 | 3343.5647   | 5602.9261  | 5623.5970   |           |
| 356.1934                | -14340.1204 | -1812.9271 | 0.0000      | 0.0000    |
| 8135.1223               | 6908.3560   | 310.2053   | -1226.7663  | 6979.4615 |
| 311.4040                | -109.2101   | -22.1351   | 680285.8938 | -10.4150  |
| -10.4042                |             |            |             |           |
| [19891]ENERGY: 15540000 | 3353.8404   | 5494.6471  | 5682.3327   |           |
| 353.8076                | -14377.8703 | -1721.3918 | 0.0000      | 0.0000    |
| 8128.2569               | 6913.6226   | 309.9435   | -1214.6343  | 6981.1870 |
| 311.2770                | 39.6560     | 72.0112    | 680285.8938 | -14.8843  |
| -14.8895                |             |            |             |           |
| [19941]ENERGY: 15550000 | 3335.9178   | 5592.5989  | 5625.6539   |           |
| 325.8706                | -14337.5655 | -1839.7822 | 0.0000      | 0.0000    |
| 8213.8485               | 6916.5420   | 313.2073   | -1297.3065  | 6982.9913 |
| 311.4280                | -89.3286    | -10.1714   | 680285.8938 | -12.0094  |
| -12.0028                |             |            |             |           |
| [19977]ENERGY: 15560000 | 3358.9665   | 5498.5206  | 5670.2395   |           |
| 358.1809                | -14329.2001 | -1816.2556 | 0.0000      | 0.0000    |
| 8173.9468               | 6914.3987   | 311.6858   | -1259.5481  | 6980.9847 |
| 311.4056                | 39.0160     | 34.1374    | 680285.8938 | -8.3423   |
| -8.3676                 |             |            |             |           |
| [20027]ENERGY: 15570000 | 3360.8035   | 5466.3126  | 5704.6278   |           |
| 334.0942                | -14317.2939 | -1836.3780 | 0.0000      | 0.0000    |
| 8205.8649               | 6918.0312   | 312.9029   | -1287.8337  | 6982.6883 |
| 311.3306                | -8.9111     | -90.8635   | 680285.8938 | -11.0387  |
| -11.0285                |             |            |             |           |
| [20063]ENERGY: 15580000 | 3358.4051   | 5454.6120  | 5680.9321   |           |
| 338.2076                | -14387.3852 | -1683.3980 | 0.0000      | 0.0000    |
| 8154.3883               | 6915.7618   | 310.9400   | -1238.6265  | 6982.2770 |
| 311.3445                | -47.7784    | -15.3966   | 680285.8938 | -10.0146  |
| -10.0207                |             |            |             |           |
| [20113]ENERGY: 15590000 | 3344.9312   | 5532.5984  | 5688.4628   |           |
| 349.5951                | -14295.1565 | -1830.2945 | 0.0000      | 0.0000    |
| 8126.3395               | 6916.4761   | 309.8704   | -1209.8634  | 6983.1818 |
| 311.2439                | -72.2747    | -36.8345   | 680285.8938 | -9.9378   |
| -9.9205                 |             |            |             |           |
| [20152]ENERGY: 15600000 | 3342.3074   | 5531.1997  | 5713.5487   |           |
| 364.4609                | -14255.0273 | -1814.6851 | 0.0000      | 0.0000    |
| 8036.7200               | 6918.5243   | 306.4531   | -1118.1956  | 6984.3418 |
| 311.1349                | 0.9132      | -20.2597   | 680285.8938 | -13.2845  |
| -13.3172                |             |            |             |           |



## Supplementary Text 6

|                         |             |            |             |           |
|-------------------------|-------------|------------|-------------|-----------|
| [20202]ENERGY: 15610000 | 3361.7941   | 5430.2493  | 5678.4750   |           |
| 358.4241                | -14325.1000 | -1691.9293 | 0.0000      | 0.0000    |
| 8108.8884               | 6920.8016   | 309.2050   | -1188.0868  | 6983.7964 |
| 311.3647                | 153.1503    | 167.5438   | 680285.8938 | -9.6265   |
| -9.6053                 |             |            |             |           |
| [20238]ENERGY: 15620000 | 3402.6768   | 5500.0283  | 5677.3413   |           |
| 337.0508                | -14401.8512 | -1768.3842 | 0.0000      | 0.0000    |
| 8170.4808               | 6917.3426   | 311.5536   | -1253.1382  | 6984.1783 |
| 311.5007                | 94.0720     | 123.0975   | 680285.8938 | -7.8660   |
| -7.8612                 |             |            |             |           |
| [20288]ENERGY: 15630000 | 3389.1391   | 5530.0569  | 5709.4050   |           |
| 351.5560                | -14356.9163 | -1785.1410 | 0.0000      | 0.0000    |
| 8083.5841               | 6921.6837   | 308.2401   | -1161.9004  | 6985.2979 |
| 311.5236                | -120.8941   | -85.4602   | 680285.8938 | -7.7922   |
| -7.7895                 |             |            |             |           |
| [20324]ENERGY: 15640000 | 3368.0975   | 5570.4122  | 5683.5495   |           |
| 345.6847                | -14275.1411 | -1895.3958 | 0.0000      | 0.0000    |
| 8120.8400               | 6918.0469   | 309.6607   | -1202.7931  | 6985.3753 |
| 311.4081                | -136.2081   | -170.6429  | 680285.8938 | -7.6120   |
| -7.6070                 |             |            |             |           |
| [20374]ENERGY: 15650000 | 3340.5561   | 5423.0986  | 5729.2667   |           |
| 328.3346                | -14308.5002 | -1726.4140 | 0.0000      | 0.0000    |
| 8136.5940               | 6922.9359   | 310.2614   | -1213.6581  | 6987.0358 |
| 311.5223                | 5.4885      | -37.7782   | 680285.8938 | -9.4494   |
| -9.4714                 |             |            |             |           |
| [20410]ENERGY: 15660000 | 3356.2909   | 5528.9244  | 5710.0454   |           |
| 356.0462                | -14285.3189 | -1831.9084 | 0.0000      | 0.0000    |
| 8088.9711               | 6923.0506   | 308.4455   | -1165.9205  | 6988.0914 |
| 311.4332                | -34.6365    | -114.3043  | 680285.8938 | -9.3062   |
| -9.3093                 |             |            |             |           |
| [20460]ENERGY: 15670000 | 3334.4066   | 5533.8336  | 5645.0475   |           |
| 316.9664                | -14371.3194 | -1758.7825 | 0.0000      | 0.0000    |
| 8218.1874               | 6918.3397   | 313.3727   | -1299.8477  | 6988.1641 |
| 311.4575                | 107.5975    | 3.9056     | 680285.8938 | -14.7813  |
| -14.7886                |             |            |             |           |
| [20496]ENERGY: 15680000 | 3349.8229   | 5526.7627  | 5722.3341   |           |
| 344.7451                | -14333.3403 | -1828.2567 | 0.0000      | 0.0000    |
| 8142.2907               | 6924.3585   | 310.4787   | -1217.9322  | 6988.4487 |
| 311.5551                | 90.7880     | 28.0120    | 680285.8938 | -11.0426  |
| -11.0289                |             |            |             |           |
| [20546]ENERGY: 15690000 | 3312.9465   | 5480.7617  | 5708.1671   |           |
| 357.9761                | -14283.3510 | -1826.1884 | 0.0000      | 0.0000    |
| 8170.2277               | 6920.5397   | 311.5440   | -1249.6880  | 6988.3225 |
| 311.5022                | 8.6889      | 35.7649    | 680285.8938 | -11.4540  |
| -11.4412                |             |            |             |           |
| [20585]ENERGY: 15700000 | 3361.3009   | 5532.1576  | 5741.7046   |           |
| 339.5848                | -14359.5735 | -1784.4109 | 0.0000      | 0.0000    |
| 8095.2925               | 6926.0560   | 308.6866   | -1169.2365  | 6988.6802 |
| 311.3748                | 91.2920     | 58.1859    | 680285.8938 | -11.5165  |
| -11.5318                |             |            |             |           |
| [20635]ENERGY: 15710000 | 3374.4529   | 5550.0123  | 5678.5607   |           |
| 332.7396                | -14291.7544 | -1815.9378 | 0.0000      | 0.0000    |
| 8096.4105               | 6924.4838   | 308.7292   | -1171.9267  | 6990.1914 |
| 311.2862                | -11.1308    | -104.8578  | 680285.8938 | -13.3266  |

## Supplementary Text 6

-13.3229  
[20671]ENERGY: 15720000 3375.0373 5408.7658 5724.0501  
346.0801 -14353.4033 -1790.0277 0.0000 0.0000  
8214.2440 6924.7462 313.2224 -1289.4978 6989.4807  
311.4185 -48.1174 -138.7322 680285.8938 -13.2423  
-13.2543  
[20721]ENERGY: 15730000 3283.7426 5472.0163 5725.9195  
354.4681 -14384.0052 -1722.4646 0.0000 0.0000  
8194.2645 6923.9412 312.4605 -1270.3233 6989.4075  
311.4835 205.9927 140.5775 680285.8938 -4.6177  
-4.6066  
[20757]ENERGY: 15740000 3409.6632 5587.6361 5685.1477  
344.3977 -14380.6289 -1790.4646 0.0000 0.0000  
8068.6895 6924.4406 307.6721 -1144.2489 6989.2134  
311.4048 32.4097 -5.1434 680285.8938 -7.4698  
-7.4667  
[20807]ENERGY: 15750000 3378.3782 5552.6275 5666.2893  
362.0312 -14409.8756 -1758.3409 0.0000 0.0000  
8131.9360 6923.0458 310.0838 -1208.8902 6988.1966  
311.4378 -121.6540 -50.1984 680285.8938 -10.1203  
-10.1128  
[20843]ENERGY: 15760000 3337.9560 5522.7534 5666.1811  
336.6883 -14293.0318 -1792.6024 0.0000 0.0000  
8146.7979 6924.7425 310.6505 -1222.0554 6989.9642  
311.4180 57.9066 3.2694 680285.8938 -11.3058  
-11.3192  
[20893]ENERGY: 15770000 3278.4933 5512.9277 5723.0741  
338.7932 -14328.5421 -1747.7233 0.0000 0.0000  
8146.5634 6923.5863 310.6416 -1222.9770 6989.8104  
311.3178 -76.5802 -17.2239 680285.8938 -10.2847  
-10.2768  
[20929]ENERGY: 15780000 3321.6596 5522.1747 5732.0187  
334.6275 -14349.2190 -1742.4225 0.0000 0.0000  
8104.9086 6923.7477 309.0532 -1181.1609 6989.5037  
311.2029 78.0974 56.6489 680285.8938 -11.5574  
-11.5580  
[20979]ENERGY: 15790000 3269.6423 5510.3912 5662.8338  
336.4179 -14309.6058 -1735.9025 0.0000 0.0000  
8188.7130 6922.4899 312.2488 -1266.2232 6991.3913  
311.3280 28.1961 46.4431 680285.8938 -10.1439  
-10.1439  
[21018]ENERGY: 15800000 3357.9730 5517.2035 5683.4030  
346.1028 -14385.1887 -1754.0933 0.0000 0.0000  
8159.1454 6924.5458 311.1214 -1234.5997 6991.3745  
311.4465 43.2054 -25.0145 680285.8938 -13.1727  
-13.1758  
[21068]ENERGY: 15810000 3297.0727 5651.3235 5647.2792  
344.1717 -14395.8513 -1781.4748 0.0000 0.0000  
8162.7835 6925.3045 311.2601 -1237.4789 6991.3275  
311.5281 36.5370 -10.4395 680285.8938 -8.7605  
-8.7665  
[21104]ENERGY: 15820000 3295.9468 5533.5622 5697.5584  
334.4361 -14269.5515 -1807.2885 0.0000 0.0000  
8139.8376 6924.5011 310.3851 -1215.3365 6991.2536

## Supplementary Text 6

|                         |             |            |             |           |
|-------------------------|-------------|------------|-------------|-----------|
| 311.6339                | 26.4252     | 19.9264    | 680285.8938 | -9.8406   |
| -9.8415                 |             |            |             |           |
| [21154]ENERGY: 15830000 | 3433.3016   | 5456.7779  | 5694.8575   |           |
| 328.8123                | -14353.9601 | -1760.5608 | 0.0000      | 0.0000    |
| 8127.9163               | 6927.1447   | 309.9306   | -1200.7715  | 6991.8150 |
| 311.7216                | -153.8275   | -126.7827  | 680285.8938 | -8.5258   |
| -8.5217                 |             |            |             |           |
| [21190]ENERGY: 15840000 | 3352.0546   | 5534.4762  | 5713.9946   |           |
| 343.9610                | -14357.6220 | -1781.1724 | 0.0000      | 0.0000    |
| 8119.6608               | 6925.3528   | 309.6158   | -1194.3080  | 6990.8878 |
| 311.4886                | 2.6301      | -71.4832   | 680285.8938 | -12.4003  |
| -12.4025                |             |            |             |           |
| [21240]ENERGY: 15850000 | 3452.2575   | 5362.3010  | 5659.8206   |           |
| 357.5136                | -14277.9728 | -1821.6794 | 0.0000      | 0.0000    |
| 8191.4786               | 6923.7191   | 312.3543   | -1267.7595  | 6990.7783 |
| 311.4918                | -190.6165   | -108.4733  | 680285.8938 | -9.3816   |
| -9.3677                 |             |            |             |           |
| [21276]ENERGY: 15860000 | 3389.3861   | 5507.4958  | 5634.5032   |           |
| 314.2432                | -14297.1685 | -1766.5333 | 0.0000      | 0.0000    |
| 8140.6363               | 6922.5628   | 310.4156   | -1218.0735  | 6991.2224 |
| 311.3882                | -97.4388    | -64.4289   | 680285.8938 | -8.0696   |
| -8.0892                 |             |            |             |           |
| [21326]ENERGY: 15870000 | 3268.4622   | 5511.4276  | 5685.2826   |           |
| 332.3735                | -14252.3067 | -1779.1249 | 0.0000      | 0.0000    |
| 8156.3908               | 6922.5052   | 311.0163   | -1233.8856  | 6990.9550 |
| 311.3726                | 157.4527    | 127.4855   | 680285.8938 | -4.9618   |
| -4.9550                 |             |            |             |           |
| [21362]ENERGY: 15880000 | 3327.9320   | 5443.2637  | 5681.8751   |           |
| 319.3602                | -14294.6574 | -1723.8215 | 0.0000      | 0.0000    |
| 8173.8485               | 6927.8006   | 311.6820   | -1246.0480  | 6991.8256 |
| 311.2475                | 41.8422     | 39.4426    | 680285.8938 | -5.7389   |
| -5.7469                 |             |            |             |           |
| [21412]ENERGY: 15890000 | 3223.2559   | 5515.6068  | 5671.0463   |           |
| 353.5909                | -14179.7832 | -1890.2686 | 0.0000      | 0.0000    |
| 8234.5017               | 6927.9497   | 313.9948   | -1306.5520  | 6994.5221 |
| 311.4614                | 103.9008    | -53.9543   | 680285.8938 | -9.8983   |
| -9.9082                 |             |            |             |           |
| [21451]ENERGY: 15900000 | 3366.4287   | 5545.6252  | 5710.0529   |           |
| 351.8188                | -14292.7667 | -1909.7953 | 0.0000      | 0.0000    |
| 8155.5664               | 6926.9300   | 310.9849   | -1228.6364  | 6993.7912 |
| 311.5994                | 73.1956     | 0.4582     | 680285.8938 | -7.9003   |
| -7.8878                 |             |            |             |           |
| [21501]ENERGY: 15910000 | 3248.0186   | 5507.7417  | 5720.4459   |           |
| 319.9046                | -14328.3416 | -1731.4457 | 0.0000      | 0.0000    |
| 8188.1721               | 6924.4957   | 312.2282   | -1263.6764  | 6993.3041 |
| 311.6276                | 34.1916     | 13.9231    | 680285.8938 | -6.7657   |
| -6.7719                 |             |            |             |           |
| [21537]ENERGY: 15920000 | 3389.1929   | 5512.2239  | 5697.4728   |           |
| 351.7135                | -14327.9020 | -1844.6185 | 0.0000      | 0.0000    |
| 8150.0260               | 6928.1085   | 310.7736   | -1221.9175  | 6992.9948 |
| 311.7541                | 39.6211     | -34.7199   | 680285.8938 | -1.7378   |
| -1.7209                 |             |            |             |           |
| [21587]ENERGY: 15930000 | 3298.0514   | 5550.3237  | 5687.6006   |           |
| 362.1421                | -14343.8408 | -1838.9620 | 0.0000      | 0.0000    |

## Supplementary Text 6

|                         |             |            |             |           |
|-------------------------|-------------|------------|-------------|-----------|
| 8214.5104               | 6929.8255   | 313.2325   | -1284.6849  | 6993.9402 |
| 311.8141                | 203.7475    | 156.6470   | 680285.8938 | -5.8813   |
| -5.8788                 |             |            |             |           |
| [21623]ENERGY: 15940000 | 3308.6043   | 5487.5600  | 5672.1198   |           |
| 323.5121                | -14302.6986 | -1753.2485 | 0.0000      | 0.0000    |
| 8190.4782               | 6926.3274   | 312.3161   | -1264.1509  | 6991.7080 |
| 311.8836                | 46.4079     | 18.4201    | 680285.8938 | -6.2457   |
| -6.2373                 |             |            |             |           |
| [21673]ENERGY: 15950000 | 3383.3312   | 5459.4095  | 5695.9889   |           |
| 326.8975                | -14353.2750 | -1717.4049 | 0.0000      | 0.0000    |
| 8132.2829               | 6927.2300   | 310.0971   | -1205.0529  | 6992.1468 |
| 311.8556                | -67.4482    | -83.5872   | 680285.8938 | -8.6116   |
| -8.6279                 |             |            |             |           |
| [21709]ENERGY: 15960000 | 3260.0617   | 5454.3080  | 5676.4754   |           |
| 337.6895                | -14293.9032 | -1777.8067 | 0.0000      | 0.0000    |
| 8267.4126               | 6924.2373   | 315.2498   | -1343.1753  | 6994.0152 |
| 311.9946                | 217.5326    | 157.2120   | 680285.8938 | -5.6574   |
| -5.6530                 |             |            |             |           |
| [21759]ENERGY: 15970000 | 3323.7293   | 5612.9794  | 5645.0700   |           |
| 335.8152                | -14380.1451 | -1765.2641 | 0.0000      | 0.0000    |
| 8152.6953               | 6924.8800   | 310.8754   | -1227.8153  | 6994.3427 |
| 311.8582                | 15.1274     | -14.9940   | 680285.8938 | -11.5791  |
| -11.5597                |             |            |             |           |
| [21795]ENERGY: 15980000 | 3336.8907   | 5514.9922  | 5648.3719   |           |
| 338.7399                | -14286.6718 | -1859.0339 | 0.0000      | 0.0000    |
| 8235.7528               | 6929.0418   | 314.0425   | -1306.7110  | 6995.6844 |
| 312.1395                | -42.9554    | -98.2115   | 680285.8938 | -12.5785  |
| -12.6062                |             |            |             |           |
| [21845]ENERGY: 15990000 | 3366.8436   | 5579.6538  | 5680.1181   |           |
| 332.6189                | -14425.1564 | -1805.1991 | 0.0000      | 0.0000    |
| 8199.5673               | 6928.4462   | 312.6627   | -1271.1211  | 6994.8919 |
| 312.1872                | -163.8637   | -186.3405  | 680285.8938 | -7.3375   |
| -7.3366                 |             |            |             |           |
| [21884]ENERGY: 16000000 | 3334.1694   | 5479.9518  | 5650.3983   |           |
| 337.1444                | -14309.8983 | -1805.6385 | 0.0000      | 0.0000    |
| 8241.2784               | 6927.4054   | 314.2532   | -1313.8730  | 6995.4544 |
| 312.0210                | 114.4102    | 19.9861    | 680285.8938 | -9.7881   |
| -9.7790                 |             |            |             |           |
| [21934]ENERGY: 16010000 | 3339.3603   | 5444.5581  | 5658.7195   |           |
| 332.0276                | -14315.2869 | -1760.4941 | 0.0000      | 0.0000    |
| 8231.5069               | 6930.3914   | 313.8806   | -1301.1155  | 6994.8490 |
| 311.8613                | 85.8370     | -9.5280    | 680285.8938 | -9.8682   |
| -9.8703                 |             |            |             |           |
| [21970]ENERGY: 16020000 | 3404.9863   | 5448.5798  | 5664.2456   |           |
| 337.1879                | -14321.6987 | -1835.5422 | 0.0000      | 0.0000    |
| 8228.6428               | 6926.4016   | 313.7714   | -1302.2413  | 6994.4379 |
| 311.8954                | -149.4712   | -154.4478  | 680285.8938 | -6.1099   |
| -6.1136                 |             |            |             |           |
| [22020]ENERGY: 16030000 | 3364.6118   | 5505.0937  | 5630.4122   |           |
| 347.9450                | -14340.1410 | -1814.9049 | 0.0000      | 0.0000    |
| 8234.8118               | 6927.8287   | 314.0067   | -1306.9831  | 6993.7442 |
| 312.0551                | 28.2252     | -7.8623    | 680285.8938 | -9.3372   |
| -9.3354                 |             |            |             |           |
| [22056]ENERGY: 16040000 | 3398.8318   | 5475.2363  | 5647.5905   |           |

## Supplementary Text 6

|                         |             |            |             |           |
|-------------------------|-------------|------------|-------------|-----------|
| 342.8599                | -14364.0464 | -1776.6842 | 0.0000      | 0.0000    |
| 8205.9654               | 6929.7532   | 312.9067   | -1276.2122  | 6995.9150 |
| 312.0595                | -21.6009    | -69.3740   | 680285.8938 | -7.0826   |
| -7.0903                 |             |            |             |           |
| [22106]ENERGY: 16050000 | 3323.0413   | 5578.7355  | 5691.0282   |           |
| 334.8055                | -14392.3919 | -1751.3536 | 0.0000      | 0.0000    |
| 8145.7993               | 6929.6642   | 310.6125   | -1216.1350  | 6995.2570 |
| 312.0236                | -39.1536    | -64.1335   | 680285.8938 | -10.4662  |
| -10.4738                |             |            |             |           |
| [22142]ENERGY: 16060000 | 3361.8560   | 5606.1422  | 5656.1530   |           |
| 354.5203                | -14325.1444 | -1833.7810 | 0.0000      | 0.0000    |
| 8109.1245               | 6928.8707   | 309.2140   | -1180.2538  | 6995.0179 |
| 311.9873                | -14.2367    | -58.0313   | 680285.8938 | -8.2040   |
| -8.1865                 |             |            |             |           |
| [22192]ENERGY: 16070000 | 3320.0419   | 5546.9328  | 5652.3438   |           |
| 331.3035                | -14347.0035 | -1810.9417 | 0.0000      | 0.0000    |
| 8233.7693               | 6926.4460   | 313.9669   | -1307.3232  | 6994.5400 |
| 312.1015                | 13.5857     | -57.6251   | 680285.8938 | -10.2013  |
| -10.2020                |             |            |             |           |
| [22228]ENERGY: 16080000 | 3413.7064   | 5417.2998  | 5706.5061   |           |
| 354.8738                | -14365.8306 | -1740.8482 | 0.0000      | 0.0000    |
| 8147.2783               | 6932.9856   | 310.6689   | -1214.2927  | 6995.1482 |
| 312.0194                | 63.2531     | 11.3082    | 680285.8938 | -8.0127   |
| -8.0252                 |             |            |             |           |
| [22278]ENERGY: 16090000 | 3348.8112   | 5601.4395  | 5644.6397   |           |
| 360.9609                | -14343.0340 | -1829.5497 | 0.0000      | 0.0000    |
| 8146.6340               | 6929.9015   | 310.6443   | -1216.7325  | 6996.0241 |
| 311.8255                | 24.0626     | -54.3384   | 680285.8938 | -10.5473  |
| -10.5406                |             |            |             |           |
| [22317]ENERGY: 16100000 | 3340.3324   | 5541.8787  | 5654.4309   |           |
| 351.5418                | -14388.9972 | -1830.2975 | 0.0000      | 0.0000    |
| 8257.0894               | 6925.9783   | 314.8561   | -1331.1111  | 6995.1762 |
| 312.0966                | -68.0559    | -100.5689  | 680285.8938 | -8.7066   |
| -8.6995                 |             |            |             |           |
| [22367]ENERGY: 16110000 | 3351.0302   | 5562.8414  | 5656.1013   |           |
| 341.8585                | -14375.5338 | -1760.5836 | 0.0000      | 0.0000    |
| 8152.3363               | 6928.0502   | 310.8617   | -1224.2861  | 6995.5936 |
| 312.2017                | 12.0317     | -13.3267   | 680285.8938 | -4.9937   |
| -4.9919                 |             |            |             |           |
| [22403]ENERGY: 16120000 | 3328.3612   | 5462.0414  | 5646.1720   |           |
| 347.5596                | -14305.7444 | -1755.1619 | 0.0000      | 0.0000    |
| 8203.5985               | 6926.8265   | 312.8164   | -1276.7720  | 6995.4025 |
| 312.1473                | 20.3536     | -27.7150   | 680285.8938 | -10.0350  |
| -10.0417                |             |            |             |           |
| [22453]ENERGY: 16130000 | 3343.5450   | 5485.7929  | 5666.1192   |           |
| 351.3782                | -14340.9999 | -1748.4887 | 0.0000      | 0.0000    |
| 8173.4695               | 6930.8161   | 311.6676   | -1242.6533  | 6995.9878 |
| 312.0232                | 8.6036      | -54.7105   | 680285.8938 | -5.9415   |
| -5.9479                 |             |            |             |           |
| [22489]ENERGY: 16140000 | 3408.4447   | 5491.8209  | 5671.6840   |           |
| 328.0388                | -14370.8796 | -1770.2456 | 0.0000      | 0.0000    |
| 8168.9725               | 6927.8356   | 311.4961   | -1241.1368  | 6995.9879 |
| 312.0222                | -129.0202   | -133.1536  | 680285.8938 | -5.9210   |
| -5.8999                 |             |            |             |           |

## Supplementary Text 6

|                         |             |            |             |
|-------------------------|-------------|------------|-------------|
| [22539]ENERGY: 16150000 | 3379.8964   | 5525.0065  | 5656.6542   |
| 353.5150                | -14379.4847 | -1735.8153 | 0.0000      |
| 8134.9981               | 6934.7703   | 310.2006   | -1200.2278  |
| 312.0960                | 22.4209     | -8.9632    | 680285.8938 |
| -7.1501                 |             |            | -7.1525     |
| [22575]ENERGY: 16160000 | 3299.6918   | 5554.1324  | 5668.1948   |
| 323.0058                | -14356.2650 | -1806.7730 | 0.0000      |
| 8248.9408               | 6930.9276   | 314.5454   | -1318.0132  |
| 312.3987                | -38.3185    | 13.7617    | 680285.8938 |
| -7.5887                 |             |            | -7.5672     |
| [22625]ENERGY: 16170000 | 3388.4948   | 5417.3975  | 5680.3527   |
| 337.2902                | -14320.1139 | -1807.0896 | 0.0000      |
| 8235.6513               | 6931.9830   | 314.0387   | -1303.6683  |
| 312.2575                | -35.9397    | -40.9670   | 680285.8938 |
| -13.5611                |             |            | -13.5728    |
| [22661]ENERGY: 16180000 | 3325.9464   | 5456.9158  | 5719.7980   |
| 318.2513                | -14255.9393 | -1836.4855 | 0.0000      |
| 8202.6726               | 6931.1593   | 312.7811   | -1271.5134  |
| 312.1887                | -174.8653   | -142.4946  | 680285.8938 |
| -9.9261                 |             |            | -9.9199     |
| [22711]ENERGY: 16190000 | 3326.4241   | 5440.9686  | 5672.2329   |
| 343.9261                | -14248.6029 | -1834.8998 | 0.0000      |
| 8230.4451               | 6930.4939   | 313.8401   | -1299.9511  |
| 312.0787                | -54.6213    | -97.6786   | 680285.8938 |
| -7.9358                 |             |            | -7.9425     |
| [22750]ENERGY: 16200000 | 3292.3483   | 5588.0682  | 5757.2670   |
| 338.7219                | -14418.3550 | -1838.5709 | 0.0000      |
| 8210.2104               | 6929.6900   | 313.0686   | -1280.5204  |
| 312.1346                | 154.3034    | 92.4838    | 680285.8938 |
| -9.5775                 |             |            | -9.5606     |
| [22800]ENERGY: 16210000 | 3331.4777   | 5462.8452  | 5718.3458   |
| 368.6281                | -14329.5977 | -1760.0748 | 0.0000      |
| 8138.7913               | 6930.4155   | 310.3452   | -1208.3758  |
| 312.1246                | -113.5729   | -138.1928  | 680285.8938 |
| -11.3166                |             |            | -11.3271    |
| [22836]ENERGY: 16220000 | 3435.9567   | 5540.4333  | 5684.7527   |
| 338.0830                | -14371.8059 | -1829.7798 | 0.0000      |
| 8134.1742               | 6931.8142   | 310.1692   | -1202.3600  |
| 312.0884                | -67.3588    | -72.0062   | 680285.8938 |
| -12.1204                |             |            | -12.1167    |
| [22886]ENERGY: 16230000 | 3294.3460   | 5584.7020  | 5704.2439   |
| 344.1301                | -14348.6124 | -1841.7014 | 0.0000      |
| 8194.1073               | 6931.2155   | 312.4545   | -1262.8918  |
| 312.0063                | -54.5276    | -156.8842  | 680285.8938 |
| -7.5923                 |             |            | -7.5962     |
| [22922]ENERGY: 16240000 | 3305.0911   | 5514.9801  | 5667.6927   |
| 346.5320                | -14279.5046 | -1791.9921 | 0.0000      |
| 8168.9695               | 6931.7688   | 311.4960   | -1237.2008  |
| 312.1503                | 262.3729    | 237.9441   | 680285.8938 |
| -16.0345                |             |            | -16.0365    |
| [22972]ENERGY: 16250000 | 3290.6657   | 5488.3001  | 5674.9482   |
| 345.9761                | -14294.1706 | -1724.2753 | 0.0000      |
| 8152.3342               | 6933.7784   | 310.8616   | -1218.5558  |
| 312.1052                | 160.9462    | 61.3245    | 680285.8938 |
|                         |             |            | -10.7481    |

## Supplementary Text 6

-10.7640  
[23008]ENERGY: 16260000      3311.7188      5518.2071      5660.4087  
340.2454      -14275.0864      -1789.2509      0.0000      0.0000  
8166.4695      6932.7123      311.4007      -1233.7572      6997.5308  
311.8800      -62.6896      -61.9924      680285.8938      -9.7778  
-9.7533  
[23058]ENERGY: 16270000      3371.9020      5518.2337      5664.2551  
339.5556      -14368.2045      -1774.7317      0.0000      0.0000  
8179.9475      6930.9577      311.9146      -1248.9898      6997.4031  
311.9604      -43.5732      -12.3612      680285.8938      -11.2103  
-11.2151  
[23094]ENERGY: 16280000      3420.0061      5533.0686      5681.9515  
363.5023      -14374.7743      -1835.5262      0.0000      0.0000  
8145.6276      6933.8554      310.6059      -1211.7722      6998.1315  
312.0060      -137.7653      -80.4252      680285.8938      -13.7371  
-13.7397  
[23144]ENERGY: 16290000      3372.0012      5441.7491      5681.0173  
313.1562      -14260.3399      -1775.1938      0.0000      0.0000  
8163.1923      6935.5823      311.2757      -1227.6100      6997.3708  
312.0570      -55.8836      -19.8882      680285.8938      -9.8477  
-9.8687  
[23183]ENERGY: 16300000      3359.8680      5534.8219      5696.3676  
361.6300      -14428.6017      -1785.2097      0.0000      0.0000  
8190.7271      6929.6032      312.3256      -1261.1239      6997.2856  
312.0677      63.9870      51.7017      680285.8938      -8.3426  
-8.3300  
[23233]ENERGY: 16310000      3287.7217      5503.1175      5666.9605  
345.6493      -14337.2878      -1777.9726      0.0000      0.0000  
8239.2856      6927.4742      314.1772      -1311.8114      6996.7899  
312.0487      157.8818      56.8461      680285.8938      -9.9924  
-9.9894  
[23269]ENERGY: 16320000      3325.4589      5418.1104      5687.2039  
337.2401      -14252.0593      -1804.8055      0.0000      0.0000  
8220.3239      6931.4725      313.4542      -1288.8515      6997.7258  
312.1277      1.8021      -26.6170      680285.8938      -7.8982  
-7.8949  
[23319]ENERGY: 16330000      3278.8813      5472.6328      5691.4243  
332.0711      -14329.4530      -1729.2832      0.0000      0.0000  
8215.3676      6931.6409      313.2652      -1283.7267      6996.7948  
311.8641      212.7492      77.7634      680285.8938      -8.7821  
-8.7770  
[23355]ENERGY: 16340000      3396.0130      5467.7220      5693.7574  
318.9162      -14351.6708      -1743.0817      0.0000      0.0000  
8147.6938      6929.3500      310.6847      -1218.3438      6995.6849  
311.9778      117.4266      59.6177      680285.8938      -8.9803  
-8.9759  
[23405]ENERGY: 16350000      3369.3707      5486.2297      5645.3149  
364.9352      -14272.1104      -1834.2634      0.0000      0.0000  
8172.6106      6932.0873      311.6348      -1240.5233      6996.7185  
311.9403      -38.5486      -9.5391      680285.8938      -13.3235  
-13.3274  
[23441]ENERGY: 16360000      3370.5513      5553.0362      5631.7340  
339.4428      -14336.3102      -1783.2680      0.0000      0.0000  
8159.4297      6934.6158      311.1322      -1224.8139      6998.4595

## Supplementary Text 6

|                         |             |            |             |           |
|-------------------------|-------------|------------|-------------|-----------|
| 311.9614                | 22.9070     | 54.6595    | 680285.8938 | -9.6243   |
| -9.6278                 |             |            |             |           |
| [23491]ENERGY: 16370000 | 3295.3188   | 5581.6383  | 5678.4977   |           |
| 343.0455                | -14333.3317 | -1798.4249 | 0.0000      | 0.0000    |
| 8168.4165               | 6935.1602   | 311.4749   | -1233.2563  | 6999.7901 |
| 312.0371                | 0.0033      | 33.8856    | 680285.8938 | -14.5560  |
| -14.5620                |             |            |             |           |
| [23527]ENERGY: 16380000 | 3392.4607   | 5538.8204  | 5663.0619   |           |
| 331.3541                | -14308.8848 | -1782.4161 | 0.0000      | 0.0000    |
| 8100.0458               | 6934.4419   | 308.8678   | -1165.6039  | 6999.6010 |
| 312.1229                | 41.3538     | 18.3137    | 680285.8938 | -13.0709  |
| -13.0834                |             |            |             |           |
| [23577]ENERGY: 16390000 | 3288.8217   | 5464.4070  | 5722.4134   |           |
| 355.7083                | -14319.5827 | -1776.5179 | 0.0000      | 0.0000    |
| 8198.9702               | 6934.2201   | 312.6400   | -1264.7502  | 7000.3781 |
| 312.0370                | -29.0282    | -26.1154   | 680285.8938 | -11.3034  |
| -11.2904                |             |            |             |           |
| [23616]ENERGY: 16400000 | 3361.2873   | 5499.1408  | 5702.5433   |           |
| 335.1598                | -14344.1629 | -1778.3694 | 0.0000      | 0.0000    |
| 8160.7806               | 6936.3795   | 311.1837   | -1224.4011  | 7001.7498 |
| 312.1689                | 40.9530     | 36.0733    | 680285.8938 | -10.1751  |
| -10.1624                |             |            |             |           |
| [23666]ENERGY: 16410000 | 3358.7737   | 5578.0061  | 5664.5146   |           |
| 338.8166                | -14290.5076 | -1818.1370 | 0.0000      | 0.0000    |
| 8105.4804               | 6936.9467   | 309.0750   | -1168.5337  | 7002.1075 |
| 312.1712                | -152.8146   | -143.5001  | 680285.8938 | -10.4991  |
| -10.4945                |             |            |             |           |
| [23702]ENERGY: 16420000 | 3352.5185   | 5505.7555  | 5665.9713   |           |
| 350.1535                | -14297.2071 | -1860.0955 | 0.0000      | 0.0000    |
| 8219.3544               | 6936.4507   | 313.4172   | -1282.9037  | 7002.6669 |
| 312.1467                | 20.3348     | -18.3478   | 680285.8938 | -8.1886   |
| -8.2140                 |             |            |             |           |
| [23752]ENERGY: 16430000 | 3372.2001   | 5460.5586  | 5689.2843   |           |
| 335.9372                | -14342.6778 | -1821.9896 | 0.0000      | 0.0000    |
| 8240.0130               | 6933.3259   | 314.2050   | -1306.6871  | 7002.6712 |
| 312.3336                | -27.8713    | -13.7602   | 680285.8938 | -8.9666   |
| -8.9586                 |             |            |             |           |
| [23788]ENERGY: 16440000 | 3312.0213   | 5543.3032  | 5702.1860   |           |
| 322.0305                | -14324.9440 | -1761.0492 | 0.0000      | 0.0000    |
| 8146.6598               | 6940.2076   | 310.6453   | -1206.4522  | 7003.7098 |
| 312.1394                | -35.3644    | -54.7365   | 680285.8938 | -7.5330   |
| -7.5274                 |             |            |             |           |
| [23838]ENERGY: 16450000 | 3364.5511   | 5450.9935  | 5650.4658   |           |
| 336.0796                | -14259.1597 | -1761.8784 | 0.0000      | 0.0000    |
| 8157.5347               | 6938.5865   | 311.0600   | -1218.9482  | 7002.9684 |
| 312.0357                | 37.1673     | 36.6856    | 680285.8938 | -7.6938   |
| -7.7030                 |             |            |             |           |
| [23874]ENERGY: 16460000 | 3340.6657   | 5420.2942  | 5732.7233   |           |
| 323.9456                | -14267.3333 | -1784.9372 | 0.0000      | 0.0000    |
| 8170.9065               | 6936.2647   | 311.5698   | -1234.6417  | 7004.7627 |
| 312.0932                | -166.8093   | -126.3386  | 680285.8938 | -4.7987   |
| -4.7709                 |             |            |             |           |
| [23924]ENERGY: 16470000 | 3334.0089   | 5537.4508  | 5720.1073   |           |
| 312.1087                | -14341.1774 | -1764.6186 | 0.0000      | 0.0000    |



## Supplementary Text 6

|                         |             |            |             |           |
|-------------------------|-------------|------------|-------------|-----------|
| 8144.7793               | 6942.6591   | 310.5736   | -1202.1202  | 7004.7838 |
| 312.0806                | 84.2090     | 64.6006    | 680285.8938 | -9.0529   |
| -9.0788                 |             |            |             |           |
| [23960]ENERGY: 16480000 | 3417.3339   | 5520.9063  | 5670.8274   |           |
| 337.1460                | -14299.0613 | -1793.9225 | 0.0000      | 0.0000    |
| 8089.3380               | 6942.5678   | 308.4595   | -1146.7702  | 7004.4306 |
| 312.0980                | -29.5001    | -17.1320   | 680285.8938 | -11.3828  |
| -11.3681                |             |            |             |           |
| [24010]ENERGY: 16490000 | 3353.3795   | 5526.0044  | 5693.3226   |           |
| 338.4989                | -14324.5837 | -1775.5996 | 0.0000      | 0.0000    |
| 8131.3277               | 6942.3497   | 310.0606   | -1188.9780  | 7004.7246 |
| 312.1347                | 42.1490     | 28.4389    | 680285.8938 | -10.7051  |
| -10.7143                |             |            |             |           |
| [24049]ENERGY: 16500000 | 3408.6479   | 5428.2081  | 5718.0196   |           |
| 353.7742                | -14263.2778 | -1844.3478 | 0.0000      | 0.0000    |
| 8141.5871               | 6942.6113   | 310.4518   | -1198.9758  | 7003.8456 |
| 312.2339                | -6.8341     | -22.1450   | 680285.8938 | -6.3654   |
| -6.3693                 |             |            |             |           |
| [24099]ENERGY: 16510000 | 3295.7060   | 5477.0123  | 5638.7853   |           |
| 333.0726                | -14294.8124 | -1772.1691 | 0.0000      | 0.0000    |
| 8258.0939               | 6935.6886   | 314.8944   | -1322.4053  | 7002.3976 |
| 312.4249                | -36.9152    | -81.0904   | 680285.8938 | -5.4252   |
| -5.4301                 |             |            |             |           |
| [24135]ENERGY: 16520000 | 3361.7141   | 5498.2688  | 5687.5988   |           |
| 332.3169                | -14337.5508 | -1783.6445 | 0.0000      | 0.0000    |
| 8178.9808               | 6937.6840   | 311.8777   | -1241.2968  | 7004.1830 |
| 312.3899                | -6.1115     | -67.8577   | 680285.8938 | -5.1560   |
| -5.1446                 |             |            |             |           |
| [24185]ENERGY: 16530000 | 3344.9710   | 5534.3404  | 5612.1358   |           |
| 350.3114                | -14393.7199 | -1778.3309 | 0.0000      | 0.0000    |
| 8263.9152               | 6933.6231   | 315.1164   | -1330.2922  | 7003.0150 |
| 312.3170                | -53.7139    | -54.4499   | 680285.8938 | -4.9431   |
| -4.9428                 |             |            |             |           |
| [24221]ENERGY: 16540000 | 3290.2422   | 5492.9169  | 5705.3616   |           |
| 341.3869                | -14259.1171 | -1833.7747 | 0.0000      | 0.0000    |
| 8203.8838               | 6940.8996   | 312.8273   | -1262.9842  | 7003.9030 |
| 312.2545                | -34.3677    | -83.6205   | 680285.8938 | -7.1147   |
| -7.1114                 |             |            |             |           |
| [24271]ENERGY: 16550000 | 3287.5635   | 5593.7198  | 5668.9423   |           |
| 327.9792                | -14410.9458 | -1831.5747 | 0.0000      | 0.0000    |
| 8297.3852               | 6933.0695   | 316.3927   | -1364.3158  | 7003.9443 |
| 312.2415                | 16.3369     | -60.0077   | 680285.8938 | -8.0099   |
| -8.0274                 |             |            |             |           |
| [24307]ENERGY: 16560000 | 3288.9887   | 5427.3762  | 5662.8692   |           |
| 354.1331                | -14301.7780 | -1775.1549 | 0.0000      | 0.0000    |
| 8280.2513               | 6936.6858   | 315.7393   | -1343.5655  | 7004.6923 |
| 312.2865                | 73.9173     | -1.6921    | 680285.8938 | -7.2077   |
| -7.2051                 |             |            |             |           |
| [24357]ENERGY: 16570000 | 3343.0395   | 5425.1182  | 5618.0163   |           |
| 325.9965                | -14303.2386 | -1684.2023 | 0.0000      | 0.0000    |
| 8217.9955               | 6942.7251   | 313.3654   | -1275.2704  | 7004.7083 |
| 312.3509                | 153.8813    | 40.7340    | 680285.8938 | -5.4308   |
| -5.4107                 |             |            |             |           |
| [24393]ENERGY: 16580000 | 3289.5479   | 5416.0364  | 5655.7625   |           |

## Supplementary Text 6

|                         |             |            |             |           |
|-------------------------|-------------|------------|-------------|-----------|
| 355.4477                | -14265.9961 | -1774.4750 | 0.0000      | 0.0000    |
| 8262.9853               | 6939.3088   | 315.0810   | -1323.6765  | 7005.9485 |
| 312.2380                | 68.9262     | 17.1962    | 680285.8938 | -9.9244   |
| -9.9450                 |             |            |             |           |
| [24443]ENERGY: 16590000 | 3367.3390   | 5453.6757  | 5668.9029   |           |
| 337.4416                | -14298.4913 | -1749.2506 | 0.0000      | 0.0000    |
| 8159.8137               | 6939.4309   | 311.1469   | -1220.3828  | 7004.2595 |
| 312.2514                | -14.4338    | -46.8310   | 680285.8938 | -10.0630  |
| -10.0573                |             |            |             |           |
| [24482]ENERGY: 16600000 | 3351.2954   | 5537.2480  | 5656.0696   |           |
| 329.2135                | -14393.9640 | -1763.7976 | 0.0000      | 0.0000    |
| 8221.0140               | 6937.0789   | 313.4805   | -1283.9351  | 7005.4778 |
| 312.3276                | -48.3448    | -42.0844   | 680285.8938 | -10.9248  |
| -10.9216                |             |            |             |           |
| [24532]ENERGY: 16610000 | 3330.4822   | 5524.6261  | 5670.4360   |           |
| 375.8251                | -14363.9830 | -1751.9370 | 0.0000      | 0.0000    |
| 8157.3293               | 6942.7786   | 311.0521   | -1214.5507  | 7005.8897 |
| 312.4175                | 156.5346    | 116.7938   | 680285.8938 | -12.3537  |
| -12.3517                |             |            |             |           |
| [24568]ENERGY: 16620000 | 3334.8944   | 5452.3366  | 5663.2952   |           |
| 319.5583                | -14282.0238 | -1726.0220 | 0.0000      | 0.0000    |
| 8177.6431               | 6939.6818   | 311.8267   | -1237.9613  | 7006.5026 |
| 312.2917                | -9.4338     | -10.7181   | 680285.8938 | -9.3484   |
| -9.3432                 |             |            |             |           |
| [24618]ENERGY: 16630000 | 3347.9745   | 5535.4615  | 5651.0715   |           |
| 349.8590                | -14306.7296 | -1862.8335 | 0.0000      | 0.0000    |
| 8227.3841               | 6942.1876   | 313.7234   | -1285.1965  | 7006.3599 |
| 312.2868                | -2.3562     | 25.4473    | 680285.8938 | -6.6506   |
| -6.6770                 |             |            |             |           |
| [24654]ENERGY: 16640000 | 3375.5947   | 5542.9951  | 5670.3515   |           |
| 342.3700                | -14436.4565 | -1816.8016 | 0.0000      | 0.0000    |
| 8262.9655               | 6941.0187   | 315.0802   | -1321.9468  | 7007.0517 |
| 312.4182                | 23.4497     | 34.8435    | 680285.8938 | -12.0445  |
| -12.0140                |             |            |             |           |
| [24704]ENERGY: 16650000 | 3293.3052   | 5508.5807  | 5672.3446   |           |
| 346.1545                | -14295.8836 | -1785.7649 | 0.0000      | 0.0000    |
| 8205.7977               | 6944.5341   | 312.9003   | -1261.2636  | 7009.7894 |
| 312.2934                | -30.8645    | -33.1342   | 680285.8938 | -14.2667  |
| -14.2775                |             |            |             |           |
| [24740]ENERGY: 16660000 | 3414.2319   | 5552.0341  | 5665.2303   |           |
| 331.8134                | -14418.8636 | -1728.5577 | 0.0000      | 0.0000    |
| 8130.3975               | 6946.2859   | 310.0252   | -1184.1116  | 7009.8033 |
| 312.2800                | -73.2102    | -118.2213  | 680285.8938 | -5.8345   |
| -5.8296                 |             |            |             |           |
| [24790]ENERGY: 16670000 | 3347.7050   | 5453.5603  | 5672.4672   |           |
| 364.7421                | -14320.8841 | -1873.7967 | 0.0000      | 0.0000    |
| 8299.7646               | 6943.5583   | 316.4834   | -1356.2063  | 7009.9752 |
| 312.1374                | -16.8135    | -28.9314   | 680285.8938 | -7.9962   |
| -7.9951                 |             |            |             |           |
| [24826]ENERGY: 16680000 | 3392.0985   | 5483.2754  | 5644.4211   |           |
| 339.4148                | -14380.0160 | -1741.6355 | 0.0000      | 0.0000    |
| 8206.3341               | 6943.8924   | 312.9208   | -1262.4417  | 7009.3884 |
| 312.4123                | 6.4988      | -34.1828   | 680285.8938 | -6.0688   |
| -6.0616                 |             |            |             |           |

## Supplementary Text 6

|                         |             |            |             |           |
|-------------------------|-------------|------------|-------------|-----------|
| [24876]ENERGY: 16690000 | 3292.8504   | 5511.4064  | 5657.6388   |           |
| 362.3785                | -14310.9604 | -1840.0970 | 0.0000      | 0.0000    |
| 8267.3216               | 6940.5383   | 315.2463   | -1326.7833  | 7010.6100 |
| 312.2762                | 60.0079     | -37.0622   | 680285.8938 | -8.8805   |
| -8.8970                 |             |            |             |           |
| [24915]ENERGY: 16700000 | 3408.0426   | 5412.0515  | 5657.2300   |           |
| 337.2521                | -14322.3283 | -1785.5931 | 0.0000      | 0.0000    |
| 8233.9235               | 6940.5783   | 313.9728   | -1293.3453  | 7009.8248 |
| 312.2291                | 86.8973     | 91.1623    | 680285.8938 | -12.5834  |
| -12.5858                |             |            |             |           |
| [24965]ENERGY: 16710000 | 3402.8607   | 5499.1999  | 5661.5955   |           |
| 326.5880                | -14304.3384 | -1804.0507 | 0.0000      | 0.0000    |
| 8163.5447               | 6945.3996   | 311.2891   | -1218.1451  | 7009.1917 |
| 312.1579                | -53.4688    | 1.8594     | 680285.8938 | -7.4787   |
| -7.4750                 |             |            |             |           |
| [25001]ENERGY: 16720000 | 3439.4767   | 5465.7694  | 5697.3130   |           |
| 315.8417                | -14390.5873 | -1788.3460 | 0.0000      | 0.0000    |
| 8203.0450               | 6942.5125   | 312.7953   | -1260.5325  | 7009.2000 |
| 312.3145                | -101.4224   | -161.5988  | 680285.8938 | -9.4201   |
| -9.4255                 |             |            |             |           |
| [25051]ENERGY: 16730000 | 3334.1809   | 5468.3655  | 5625.5221   |           |
| 338.3609                | -14259.4932 | -1801.1160 | 0.0000      | 0.0000    |
| 8234.1453               | 6939.9655   | 313.9812   | -1294.1797  | 7009.7496 |
| 312.4251                | -115.5673   | -126.1898  | 680285.8938 | -11.5415  |
| -11.5487                |             |            |             |           |
| [25087]ENERGY: 16740000 | 3372.9803   | 5504.6044  | 5678.6038   |           |
| 366.1360                | -14337.9397 | -1771.7077 | 0.0000      | 0.0000    |
| 8132.1547               | 6944.8317   | 310.0922   | -1187.3229  | 7011.1053 |
| 312.2895                | 141.1280    | 56.6962    | 680285.8938 | -8.3839   |
| -8.3672                 |             |            |             |           |
| [25137]ENERGY: 16750000 | 3401.7513   | 5450.2116  | 5661.0821   |           |
| 346.5861                | -14353.9303 | -1780.9424 | 0.0000      | 0.0000    |
| 8225.0554               | 6949.8137   | 313.6346   | -1275.2417  | 7012.0414 |
| 312.2886                | -54.9283    | -40.8870   | 680285.8938 | -12.5083  |
| -12.5151                |             |            |             |           |
| [25173]ENERGY: 16760000 | 3347.4040   | 5632.5033  | 5698.7118   |           |
| 328.3394                | -14368.3147 | -1794.1691 | 0.0000      | 0.0000    |
| 8099.5024               | 6943.9772   | 308.8471   | -1155.5252  | 7011.4090 |
| 312.4195                | -95.1731    | -57.4218   | 680285.8938 | -7.6058   |
| -7.5873                 |             |            |             |           |
| [25223]ENERGY: 16770000 | 3437.2085   | 5530.7958  | 5644.2409   |           |
| 349.7293                | -14428.0457 | -1772.8573 | 0.0000      | 0.0000    |
| 8186.0270               | 6947.0987   | 312.1464   | -1238.9284  | 7013.7293 |
| 312.5266                | -92.3545    | -57.9335   | 680285.8938 | -6.7357   |
| -6.7474                 |             |            |             |           |
| [25259]ENERGY: 16780000 | 3310.5648   | 5511.4231  | 5623.4150   |           |
| 335.9878                | -14331.6430 | -1725.5113 | 0.0000      | 0.0000    |
| 8223.8618               | 6948.0983   | 313.5891   | -1275.7635  | 7014.7417 |
| 312.4933                | 4.1427      | 65.4715    | 680285.8938 | -5.3711   |
| -5.3635                 |             |            |             |           |
| [25309]ENERGY: 16790000 | 3377.5173   | 5558.1037  | 5670.0351   |           |
| 333.2209                | -14294.6589 | -1834.8787 | 0.0000      | 0.0000    |
| 8143.3761               | 6952.7155   | 310.5201   | -1190.6607  | 7016.5986 |
| 312.4522                | -121.8710   | -134.3218  | 680285.8938 | -6.7222   |

Supplementary Text 6

-6.7348  
 [25348]ENERGY: 16800000 3368.3414 5510.8165 5692.6029  
 368.0549 -14340.6370 -1833.6342 0.0000 0.0000  
 8179.8942 6945.4388 311.9126 -1234.4554 7015.0794  
 312.2722 -218.9205 -139.7488 680285.8938 -9.3322  
 -9.3247  
 [25398]ENERGY: 16810000 3321.5179 5498.5450 5653.7877  
 338.1832 -14236.1260 -1850.1786 0.0000 0.0000  
 8223.1585 6948.8877 313.5623 -1274.2708 7015.3826  
 312.5441 -34.3782 -76.6081 680285.8938 -8.2787  
 -8.2876  
 [25434]ENERGY: 16820000 3309.7991 5498.6499 5677.0560  
 315.0381 -14395.2074 -1676.1924 0.0000 0.0000  
 8220.5055 6949.6488 313.4611 -1270.8567 7014.8888  
 312.2535 71.3025 42.2328 680285.8938 -7.7043  
 -7.7053  
 [25484]ENERGY: 16830000 3350.1966 5549.4294 5699.5827  
 332.1413 -14381.4184 -1783.8080 0.0000 0.0000  
 8185.5495 6951.6730 312.1282 -1233.8764 7015.7609  
 312.4408 66.8195 -100.9064 680285.8938 -7.3568  
 -7.3387  
 [25520]ENERGY: 16840000 3292.5654 5556.3835 5674.0541  
 370.1906 -14377.2259 -1800.6719 0.0000 0.0000  
 8232.5762 6947.8720 313.9214 -1284.7043 7016.5889  
 312.4876 -97.9912 -111.3748 680285.8938 -9.4212  
 -9.4271  
 [25570]ENERGY: 16850000 3387.3839 5574.4960 5638.5426  
 354.6282 -14421.6522 -1759.8280 0.0000 0.0000  
 8179.9254 6953.4959 311.9137 -1226.4295 7016.2225  
 312.4770 -38.1560 -26.1700 680285.8938 -8.1170  
 -8.1216  
 [25606]ENERGY: 16860000 3387.7155 5455.0955 5685.2821  
 346.6617 -14274.1523 -1837.1019 0.0000 0.0000  
 8188.0982 6951.5987 312.2254 -1236.4995 7016.7081  
 312.3814 -80.9617 -118.6686 680285.8938 -5.4097  
 -5.4090  
 [25656]ENERGY: 16870000 3378.0794 5500.6007 5641.4717  
 325.2318 -14367.1639 -1767.0364 0.0000 0.0000  
 8235.7208 6946.9039 314.0413 -1288.8169 7016.2829  
 312.4452 -183.8789 -176.1389 680285.8938 -5.5440  
 -5.5434  
 [25692]ENERGY: 16880000 3352.6306 5476.6466 5645.8364  
 339.1235 -14315.1660 -1813.3151 0.0000 0.0000  
 8265.9746 6951.7305 315.1949 -1314.2440 7017.3334  
 312.2966 84.2243 -6.1868 680285.8938 -7.0215  
 -7.0327  
 [25742]ENERGY: 16890000 3407.4464 5577.6294 5692.8028  
 324.2102 -14429.0049 -1767.3388 0.0000 0.0000  
 8144.4759 6950.2209 310.5620 -1194.2549 7017.2847  
 312.3662 39.8819 23.3172 680285.8938 -9.3569  
 -9.3399  
 [25781]ENERGY: 16900000 3400.0886 5462.7056 5707.1759  
 366.4354 -14396.3707 -1735.5046 0.0000 0.0000  
 8149.3584 6953.8885 310.7482 -1195.4699 7018.2999

## Supplementary Text 6

|                         |             |            |             |           |
|-------------------------|-------------|------------|-------------|-----------|
| 312.3753                | 55.5450     | 26.0756    | 680285.8938 | -15.3079  |
| -15.3171                |             |            |             |           |
| [25831]ENERGY: 16910000 | 3416.1314   | 5490.9339  | 5670.0211   |           |
| 335.9702                | -14282.2301 | -1832.5930 | 0.0000      | 0.0000    |
| 8153.9495               | 6952.1830   | 310.9232   | -1201.7665  | 7017.5173 |
| 312.7235                | -105.9812   | -28.1539   | 680285.8938 | -8.4692   |
| -8.4757                 |             |            |             |           |
| [25867]ENERGY: 16920000 | 3403.8094   | 5517.9642  | 5672.9375   |           |
| 347.2678                | -14400.1099 | -1775.7240 | 0.0000      | 0.0000    |
| 8189.1825               | 6955.3274   | 312.2667   | -1233.8551  | 7017.5621 |
| 312.6874                | 16.3501     | 21.4976    | 680285.8938 | -4.9743   |
| -4.9538                 |             |            |             |           |
| [25917]ENERGY: 16930000 | 3333.1536   | 5426.3913  | 5635.5172   |           |
| 354.1217                | -14330.8114 | -1746.7295 | 0.0000      | 0.0000    |
| 8276.5122               | 6948.1550   | 315.5968   | -1328.3572  | 7017.7136 |
| 312.3150                | 37.7349     | 41.8814    | 680285.8938 | -12.3161  |
| -12.3205                |             |            |             |           |
| [25953]ENERGY: 16940000 | 3352.6988   | 5537.4506  | 5698.9784   |           |
| 318.8099                | -14387.5791 | -1782.3781 | 0.0000      | 0.0000    |
| 8214.2961               | 6952.2765   | 313.2244   | -1262.0196  | 7018.7663 |
| 312.2796                | -25.2697    | -70.8524   | 680285.8938 | -10.7715  |
| -10.7844                |             |            |             |           |
| [26003]ENERGY: 16950000 | 3394.8017   | 5551.9986  | 5642.0371   |           |
| 344.5001                | -14363.0309 | -1814.7171 | 0.0000      | 0.0000    |
| 8198.7076               | 6954.2971   | 312.6299   | -1244.4105  | 7018.2601 |
| 312.3668                | -275.4549   | -164.2505  | 680285.8938 | -14.5325  |
| -14.5324                |             |            |             |           |
| [26039]ENERGY: 16960000 | 3338.8110   | 5481.3644  | 5678.2879   |           |
| 371.5520                | -14276.3186 | -1802.2211 | 0.0000      | 0.0000    |
| 8159.6012               | 6951.0768   | 311.1388   | -1208.5244  | 7017.1120 |
| 312.3492                | 123.6005    | 63.5016    | 680285.8938 | -6.7362   |
| -6.7278                 |             |            |             |           |
| [26089]ENERGY: 16970000 | 3370.3974   | 5437.8353  | 5697.8312   |           |
| 355.6977                | -14330.7230 | -1786.9870 | 0.0000      | 0.0000    |
| 8206.5111               | 6950.5627   | 312.9275   | -1255.9484  | 7016.4293 |
| 312.3347                | -71.6482    | -99.8153   | 680285.8938 | -9.3265   |
| -9.3320                 |             |            |             |           |
| [26125]ENERGY: 16980000 | 3324.6998   | 5502.7471  | 5698.6704   |           |
| 314.5826                | -14319.0609 | -1840.9780 | 0.0000      | 0.0000    |
| 8268.3386               | 6948.9998   | 315.2851   | -1319.3388  | 7016.7111 |
| 312.3571                | -124.6408   | -73.7771   | 680285.8938 | -6.1389   |
| -6.1304                 |             |            |             |           |
| [26175]ENERGY: 16990000 | 3352.3382   | 5447.7328  | 5700.0613   |           |
| 340.0853                | -14302.3326 | -1769.4621 | 0.0000      | 0.0000    |
| 8182.0460               | 6950.4688   | 311.9946   | -1231.5771  | 7016.7199 |
| 312.4840                | 67.9020     | -26.8014   | 680285.8938 | -10.1556  |
| -10.1787                |             |            |             |           |
| [26214]ENERGY: 17000000 | 3406.1237   | 5431.9606  | 5739.5197   |           |
| 342.5558                | -14331.2160 | -1830.0153 | 0.0000      | 0.0000    |
| 8196.5398               | 6955.4683   | 312.5473   | -1241.0715  | 7017.8471 |
| 312.6926                | -101.6091   | -107.4267  | 680285.8938 | -6.6173   |
| -6.5826                 |             |            |             |           |
| [26264]ENERGY: 17010000 | 3392.6639   | 5592.0215  | 5651.8115   |           |
| 330.6426                | -14377.9067 | -1778.5657 | 0.0000      | 0.0000    |

## Supplementary Text 6

|                         |             |            |             |           |
|-------------------------|-------------|------------|-------------|-----------|
| 8139.8285               | 6950.4954   | 310.3848   | -1189.3331  | 7018.0282 |
| 312.7373                | 86.0068     | -39.7496   | 680285.8938 | -5.6266   |
| -5.6570                 |             |            |             |           |
| [26300]ENERGY: 17020000 | 3330.4131   | 5399.2061  | 5671.3144   |           |
| 345.3979                | -14260.4867 | -1800.1286 | 0.0000      | 0.0000    |
| 8268.2123               | 6953.9285   | 315.2803   | -1314.2839  | 7017.5066 |
| 312.6034                | 34.3385     | -28.2382   | 680285.8938 | -5.5223   |
| -5.5229                 |             |            |             |           |
| [26350]ENERGY: 17030000 | 3387.2958   | 5530.2329  | 5618.6742   |           |
| 334.2037                | -14245.0899 | -1799.9621 | 0.0000      | 0.0000    |
| 8131.1640               | 6956.5185   | 310.0544   | -1174.6455  | 7017.7888 |
| 312.5632                | -232.6638   | -205.2246  | 680285.8938 | -2.3758   |
| -2.3663                 |             |            |             |           |
| [26386]ENERGY: 17040000 | 3342.6399   | 5423.3177  | 5704.0293   |           |
| 346.5971                | -14244.6254 | -1790.0616 | 0.0000      | 0.0000    |
| 8172.0144               | 6953.9114   | 311.6121   | -1218.1030  | 7017.5606 |
| 312.3985                | -124.6244   | -49.5216   | 680285.8938 | -10.8046  |
| -10.7940                |             |            |             |           |
| [26436]ENERGY: 17050000 | 3326.0557   | 5465.3015  | 5704.0208   |           |
| 341.1144                | -14333.7195 | -1729.2829 | 0.0000      | 0.0000    |
| 8180.3105               | 6953.8006   | 311.9284   | -1226.5099  | 7018.6566 |
| 312.2710                | 68.1825     | 57.2758    | 680285.8938 | -8.6504   |
| -8.6703                 |             |            |             |           |
| [26472]ENERGY: 17060000 | 3368.8060   | 5577.4547  | 5633.8699   |           |
| 324.8392                | -14225.4842 | -1894.8599 | 0.0000      | 0.0000    |
| 8165.3877               | 6950.0133   | 311.3594   | -1215.3743  | 7017.4301 |
| 312.3942                | -226.0240   | -145.9153  | 680285.8938 | -17.9942  |
| -17.9789                |             |            |             |           |
| [26522]ENERGY: 17070000 | 3351.5283   | 5452.0101  | 5677.0983   |           |
| 340.1631                | -14306.3379 | -1806.8418 | 0.0000      | 0.0000    |
| 8243.8521               | 6951.4723   | 314.3514   | -1292.3798  | 7018.8335 |
| 312.3809                | 84.6820     | -13.7453   | 680285.8938 | -8.4305   |
| -8.4289                 |             |            |             |           |
| [26558]ENERGY: 17080000 | 3313.1797   | 5496.0180  | 5688.5524   |           |
| 339.7092                | -14398.2389 | -1719.1971 | 0.0000      | 0.0000    |
| 8232.0298               | 6952.0532   | 313.9006   | -1279.9766  | 7017.2098 |
| 312.4071                | 83.7825     | 27.0859    | 680285.8938 | -14.7228  |
| -14.7220                |             |            |             |           |
| [26608]ENERGY: 17090000 | 3345.2541   | 5580.0165  | 5661.0923   |           |
| 343.7247                | -14391.9559 | -1811.7556 | 0.0000      | 0.0000    |
| 8221.6621               | 6948.0381   | 313.5052   | -1273.6240  | 7016.5489 |
| 312.4203                | -91.8685    | -94.1168   | 680285.8938 | -5.0778   |
| -5.0785                 |             |            |             |           |
| [26647]ENERGY: 17100000 | 3418.5068   | 5410.2464  | 5689.8190   |           |
| 331.7945                | -14369.8676 | -1766.2487 | 0.0000      | 0.0000    |
| 8235.8083               | 6950.0586   | 314.0446   | -1285.7496  | 7018.0130 |
| 312.3211                | 169.0796    | 68.6673    | 680285.8938 | -7.3985   |
| -7.4015                 |             |            |             |           |
| [26697]ENERGY: 17110000 | 3322.6101   | 5505.3732  | 5693.4438   |           |
| 329.9131                | -14358.8572 | -1741.3719 | 0.0000      | 0.0000    |
| 8196.7675               | 6947.8787   | 312.5560   | -1248.8887  | 7017.8255 |
| 312.2904                | 128.4257    | 145.5607   | 680285.8938 | -6.3349   |
| -6.3330                 |             |            |             |           |
| [26733]ENERGY: 17120000 | 3326.2705   | 5542.3734  | 5676.8119   |           |

## Supplementary Text 6

|                         |             |            |             |           |
|-------------------------|-------------|------------|-------------|-----------|
| 326.2984                | -14372.5631 | -1699.7811 | 0.0000      | 0.0000    |
| 8154.7058               | 6954.1158   | 310.9521   | -1200.5899  | 7018.9757 |
| 312.3136                | 83.9461     | -2.4986    | 680285.8938 | -11.3628  |
| -11.3842                |             |            |             |           |
| [26783]ENERGY: 17130000 | 3330.6020   | 5434.8329  | 5664.3642   |           |
| 341.8717                | -14313.0329 | -1745.2037 | 0.0000      | 0.0000    |
| 8239.3155               | 6952.7496   | 314.1784   | -1286.5659  | 7018.0253 |
| 312.1359                | 233.2850    | 183.0083   | 680285.8938 | -6.8487   |
| -6.8337                 |             |            |             |           |
| [26819]ENERGY: 17140000 | 3365.3191   | 5505.0312  | 5734.4296   |           |
| 366.0007                | -14379.0411 | -1877.8477 | 0.0000      | 0.0000    |
| 8238.2795               | 6952.1712   | 314.1389   | -1286.1083  | 7019.0559 |
| 312.3057                | -57.0843    | -123.9842  | 680285.8938 | -9.5494   |
| -9.5469                 |             |            |             |           |
| [26869]ENERGY: 17150000 | 3393.3217   | 5408.3434  | 5677.1655   |           |
| 345.2855                | -14303.4474 | -1794.2113 | 0.0000      | 0.0000    |
| 8225.6428               | 6952.1003   | 313.6570   | -1273.5426  | 7016.5334 |
| 312.2990                | 79.8122     | -18.5319   | 680285.8938 | -13.3116  |
| -13.3262                |             |            |             |           |
| [26905]ENERGY: 17160000 | 3376.6024   | 5467.5351  | 5688.1390   |           |
| 325.3920                | -14382.7313 | -1689.8245 | 0.0000      | 0.0000    |
| 8170.9596               | 6956.0723   | 311.5719   | -1214.8873  | 7017.5299 |
| 312.2681                | 140.0219    | 99.0871    | 680285.8938 | -10.3446  |
| -10.3412                |             |            |             |           |
| [26955]ENERGY: 17170000 | 3279.6168   | 5483.5672  | 5718.0106   |           |
| 340.7616                | -14232.7600 | -1841.5592 | 0.0000      | 0.0000    |
| 8204.5241               | 6952.1612   | 312.8517   | -1252.3629  | 7018.5015 |
| 312.3734                | 34.9803     | 25.9902    | 680285.8938 | -15.4915  |
| -15.4788                |             |            |             |           |
| [26991]ENERGY: 17180000 | 3261.2465   | 5545.7662  | 5747.4313   |           |
| 332.9303                | -14317.5827 | -1806.4028 | 0.0000      | 0.0000    |
| 8188.4196               | 6951.8084   | 312.2376   | -1236.6112  | 7019.0589 |
| 312.4111                | 127.8021    | 74.7734    | 680285.8938 | -10.1328  |
| -10.1440                |             |            |             |           |
| [27041]ENERGY: 17190000 | 3370.5185   | 5511.7332  | 5726.0256   |           |
| 329.6917                | -14477.9499 | -1741.2709 | 0.0000      | 0.0000    |
| 8234.5520               | 6953.3003   | 313.9967   | -1281.2517  | 7018.5214 |
| 312.2571                | 80.2519     | 71.8140    | 680285.8938 | -10.6770  |
| -10.6625                |             |            |             |           |
| [27080]ENERGY: 17200000 | 3342.2313   | 5533.9722  | 5651.9430   |           |
| 316.6421                | -14335.5294 | -1781.5433 | 0.0000      | 0.0000    |
| 8221.3577               | 6949.0734   | 313.4936   | -1272.2843  | 7018.1857 |
| 312.3561                | -70.1049    | -104.7169  | 680285.8938 | -10.2004  |
| -10.2100                |             |            |             |           |
| [27130]ENERGY: 17210000 | 3396.5780   | 5462.2211  | 5667.3340   |           |
| 354.4782                | -14334.4954 | -1770.0138 | 0.0000      | 0.0000    |
| 8173.7852               | 6949.8873   | 311.6796   | -1223.8979  | 7017.9345 |
| 312.4528                | -88.9543    | -26.9888   | 680285.8938 | -10.2538  |
| -10.2518                |             |            |             |           |
| [27166]ENERGY: 17220000 | 3361.8505   | 5470.2055  | 5749.4524   |           |
| 334.9956                | -14377.8901 | -1772.9941 | 0.0000      | 0.0000    |
| 8188.2610               | 6953.8808   | 312.2316   | -1234.3802  | 7017.8188 |
| 312.4825                | 129.1795    | 114.7239   | 680285.8938 | -9.4528   |
| -9.4405                 |             |            |             |           |

## Supplementary Text 6

|                         |             |            |             |
|-------------------------|-------------|------------|-------------|
| [27216]ENERGY: 17230000 | 3382.2590   | 5545.0360  | 5674.4721   |
| 332.0091                | -14278.8700 | -1827.7196 | 0.0000      |
| 8126.1183               | 6953.3049   | 309.8620   | -1172.8134  |
| 312.4310                | -41.6023    | -52.2449   | 680285.8938 |
| -10.2786                |             |            | -10.2553    |
| [27252]ENERGY: 17240000 | 3390.3467   | 5460.4458  | 5700.7155   |
| 336.8129                | -14341.0803 | -1746.1175 | 0.0000      |
| 8153.2724               | 6954.3955   | 310.8974   | -1198.8769  |
| 312.4434                | -1.6301     | 25.3266    | 680285.8938 |
| -8.4512                 |             |            | -8.4653     |
| [27302]ENERGY: 17250000 | 3339.6169   | 5444.3395  | 5731.7094   |
| 352.4625                | -14358.9890 | -1731.4648 | 0.0000      |
| 8176.2325               | 6953.9070   | 311.7729   | -1222.3255  |
| 312.2773                | -36.9656    | 0.4234     | 680285.8938 |
| -10.9185                |             |            | -10.9085    |
| [27338]ENERGY: 17260000 | 3286.1619   | 5509.4271  | 5671.1630   |
| 337.2336                | -14276.8925 | -1762.8096 | 0.0000      |
| 8192.6499               | 6956.9334   | 312.3990   | -1235.7165  |
| 312.2374                | 51.4681     | 91.1084    | 680285.8938 |
| -9.4817                 |             |            | -9.5028     |
| [27388]ENERGY: 17270000 | 3412.3437   | 5437.7026  | 5706.0285   |
| 333.6637                | -14273.6832 | -1843.6568 | 0.0000      |
| 8182.9913               | 6955.3897   | 312.0307   | -1227.6016  |
| 312.3857                | -70.9876    | -113.4254  | 680285.8938 |
| -7.3736                 |             |            | -7.3442     |
| [27424]ENERGY: 17280000 | 3415.6889   | 5539.5702  | 5708.9328   |
| 325.8069                | -14334.0720 | -1824.5050 | 0.0000      |
| 8122.2380               | 6953.6598   | 309.7140   | -1168.5782  |
| 312.4292                | -94.1375    | -153.8705  | 680285.8938 |
| -12.2273                |             |            | -12.2338    |
| [27474]ENERGY: 17290000 | 3472.0760   | 5565.1988  | 5609.9341   |
| 353.1383                | -14353.1859 | -1842.0245 | 0.0000      |
| 8154.5849               | 6959.7217   | 310.9475   | -1194.8632  |
| 312.4135                | -117.5354   | -110.8863  | 680285.8938 |
| -7.7431                 |             |            | -7.7438     |
| [27513]ENERGY: 17300000 | 3334.1882   | 5624.7624  | 5673.3635   |
| 330.1610                | -14301.4686 | -1778.7989 | 0.0000      |
| 8079.7202               | 6961.9277   | 308.0928   | -1117.7925  |
| 312.4670                | 46.5753     | 6.4918     | 680285.8938 |
| -9.8241                 |             |            | -9.8546     |
| [27563]ENERGY: 17310000 | 3357.0253   | 5522.7478  | 5685.0666   |
| 354.1694                | -14406.6131 | -1740.4160 | 0.0000      |
| 8185.7952               | 6957.7753   | 312.1376   | -1228.0200  |
| 312.5601                | 121.9006    | 52.5330    | 680285.8938 |
| -11.7581                |             |            | -11.7208    |
| [27599]ENERGY: 17320000 | 3354.5453   | 5497.9092  | 5684.0123   |
| 346.2852                | -14346.2407 | -1765.2032 | 0.0000      |
| 8184.8590               | 6956.1671   | 312.1019   | -1228.6919  |
| 312.5202                | 24.2677     | 27.2377    | 680285.8938 |
| -12.4423                |             |            | -12.4513    |
| [27649]ENERGY: 17330000 | 3343.0470   | 5446.0564  | 5647.5033   |
| 332.1540                | -14288.4297 | -1697.4795 | 0.0000      |
| 8175.2011               | 6958.0527   | 311.7336   | -1217.1484  |
| 312.5027                | 122.4760    | 51.1058    | 680285.8938 |
|                         |             |            | -10.5353    |



Supplementary Text 6

-10.5302  
 [27685]ENERGY: 17340000      3324.9021      5632.0736      5703.1224  
 336.7755      -14381.6451      -1831.5348      0.0000      0.0000  
 8171.2039      6954.8974      311.5812      -1216.3064      7022.9003  
 312.4532      -91.3563      -111.9309      680285.8938      -8.8991  
 -8.9157  
 [27735]ENERGY: 17350000      3410.1372      5440.8488      5658.1226  
 327.0895      -14281.9621      -1794.6472      0.0000      0.0000  
 8197.2408      6956.8296      312.5740      -1240.4111      7021.5687  
 312.5691      -52.2441      2.7446      680285.8938      -10.6169  
 -10.5799  
 [27771]ENERGY: 17360000      3407.4511      5461.9342      5682.8514  
 349.6029      -14408.9952      -1784.2822      0.0000      0.0000  
 8248.3210      6956.8831      314.5218      -1291.4378      7022.3056  
 312.6093      -65.1854      -65.2962      680285.8938      -10.1397  
 -10.1650  
 [27821]ENERGY: 17370000      3228.8339      5592.5503      5684.1934  
 341.9543      -14329.4022      -1766.2099      0.0000      0.0000  
 8205.2134      6957.1332      312.8780      -1248.0802      7023.1312  
 312.5385      201.4204      70.9288      680285.8938      -16.8522  
 -16.8454  
 [27857]ENERGY: 17380000      3300.6962      5566.8731      5713.5702  
 316.9928      -14367.1688      -1757.0682      0.0000      0.0000  
 8187.2639      6961.1593      312.1936      -1226.1047      7022.4752  
 312.4444      273.1275      221.1023      680285.8938      -10.1537  
 -10.1600  
 [27907]ENERGY: 17390000      3350.5886      5492.4834      5671.9547  
 331.6603      -14397.9507      -1656.7489      0.0000      0.0000  
 8163.6122      6955.5996      311.2917      -1208.0126      7022.1162  
 312.3916      36.2427      106.4968      680285.8938      -10.2696  
 -10.2627  
 [27946]ENERGY: 17400000      3338.8067      5570.4420      5650.8290  
 357.4241      -14287.0161      -1835.9666      0.0000      0.0000  
 8162.7012      6957.2203      311.2570      -1205.4809      7023.3833  
 312.3359      94.1614      61.3874      680285.8938      -8.9690  
 -8.9715  
 [27996]ENERGY: 17410000      3361.0543      5486.6510      5631.4286  
 367.0751      -14336.5680      -1773.6255      0.0000      0.0000  
 8220.0254      6956.0407      313.4428      -1263.9846      7023.2751  
 312.4965      -84.5689      -80.6552      680285.8938      -11.6604  
 -11.6680  
 [28032]ENERGY: 17420000      3375.7672      5589.9430      5676.8074  
 337.8740      -14327.7450      -1822.2632      0.0000      0.0000  
 8127.9725      6958.3559      309.9327      -1169.6166      7023.8944  
 312.7703      -52.4687      3.0055      680285.8938      -14.3003  
 -14.2829  
 [28082]ENERGY: 17430000      3333.4089      5459.9378      5679.9207  
 330.5402      -14283.1680      -1732.7320      0.0000      0.0000  
 8174.1559      6962.0635      311.6937      -1212.0924      7025.4813  
 312.8967      -1.2004      -8.9951      680285.8938      -8.1642  
 -8.1759  
 [28118]ENERGY: 17440000      3358.7664      5431.6444      5743.2062  
 349.3381      -14336.0340      -1716.7598      0.0000      0.0000  
 8128.6072      6958.7685      309.9569      -1169.8387      7024.5402

## Supplementary Text 6

|                         |             |            |             |           |
|-------------------------|-------------|------------|-------------|-----------|
| 312.6341                | 22.3798     | 23.5474    | 680285.8938 | -9.8779   |
| -9.8968                 |             |            |             |           |
| [28168]ENERGY: 17450000 | 3411.9085   | 5453.2060  | 5640.4272   |           |
| 343.9618                | -14393.4743 | -1764.3103 | 0.0000      | 0.0000    |
| 8263.0975               | 6954.8165   | 315.0852   | -1308.2810  | 7023.1522 |
| 312.6864                | -108.5331   | -85.9157   | 680285.8938 | -12.7205  |
| -12.7081                |             |            |             |           |
| [28204]ENERGY: 17460000 | 3443.4274   | 5424.6731  | 5708.4256   |           |
| 350.7230                | -14369.1341 | -1722.7973 | 0.0000      | 0.0000    |
| 8123.6167               | 6958.9343   | 309.7666   | -1164.6824  | 7022.2523 |
| 312.6824                | -58.7295    | -46.0576   | 680285.8938 | -9.7822   |
| -9.7829                 |             |            |             |           |
| [28254]ENERGY: 17470000 | 3400.9855   | 5476.4466  | 5652.1940   |           |
| 360.3409                | -14325.2934 | -1806.2740 | 0.0000      | 0.0000    |
| 8200.3609               | 6958.7606   | 312.6930   | -1241.6003  | 7024.2570 |
| 312.7585                | -97.8526    | -181.7233  | 680285.8938 | -10.1613  |
| -10.1610                |             |            |             |           |
| [28290]ENERGY: 17480000 | 3374.6408   | 5509.6797  | 5658.5058   |           |
| 329.2108                | -14258.8480 | -1851.5795 | 0.0000      | 0.0000    |
| 8196.5273               | 6958.1368   | 312.5468   | -1238.3904  | 7023.4614 |
| 312.6501                | -40.4637    | -114.7787  | 680285.8938 | -9.1167   |
| -9.0956                 |             |            |             |           |
| [28340]ENERGY: 17490000 | 3361.9007   | 5525.7131  | 5648.4197   |           |
| 324.6808                | -14337.4962 | -1733.5111 | 0.0000      | 0.0000    |
| 8164.7645               | 6954.4716   | 311.3356   | -1210.2929  | 7022.9946 |
| 312.4231                | -66.8502    | -31.1554   | 680285.8938 | -13.8515  |
| -13.8644                |             |            |             |           |
| [28379]ENERGY: 17500000 | 3422.5993   | 5446.5994  | 5656.7648   |           |
| 332.0466                | -14359.9213 | -1760.7198 | 0.0000      | 0.0000    |
| 8220.5402               | 6957.9092   | 313.4625   | -1262.6310  | 7022.6181 |
| 312.4257                | -26.6139    | -32.4156   | 680285.8938 | -8.7827   |
| -8.7907                 |             |            |             |           |
| [28429]ENERGY: 17510000 | 3379.8991   | 5492.9974  | 5698.8058   |           |
| 345.9753                | -14289.8336 | -1759.6524 | 0.0000      | 0.0000    |
| 8090.1670               | 6958.3587   | 308.4911   | -1131.8083  | 7021.5040 |
| 312.4653                | -84.7252    | -65.1570   | 680285.8938 | -16.6822  |
| -16.6723                |             |            |             |           |
| [28465]ENERGY: 17520000 | 3375.3606   | 5511.5832  | 5641.5374   |           |
| 358.5986                | -14286.2774 | -1756.0524 | 0.0000      | 0.0000    |
| 8114.0056               | 6958.7556   | 309.4001   | -1155.2499  | 7022.3795 |
| 312.3876                | -30.0777    | 2.2965     | 680285.8938 | -15.0560  |
| -15.0428                |             |            |             |           |
| [28515]ENERGY: 17530000 | 3325.8903   | 5543.6799  | 5685.2309   |           |
| 337.8817                | -14289.8059 | -1767.2594 | 0.0000      | 0.0000    |
| 8124.3492               | 6959.9668   | 309.7945   | -1164.3824  | 7023.5143 |
| 312.5277                | 203.7764    | 170.2652   | 680285.8938 | -12.8190  |
| -12.8399                |             |            |             |           |
| [28551]ENERGY: 17540000 | 3384.0187   | 5568.5895  | 5707.2148   |           |
| 335.1701                | -14391.3314 | -1766.7432 | 0.0000      | 0.0000    |
| 8117.0869               | 6954.0054   | 309.5176   | -1163.0816  | 7024.3921 |
| 312.5144                | -20.1445    | -22.4389   | 680285.8938 | -16.3664  |
| -16.3578                |             |            |             |           |
| [28601]ENERGY: 17550000 | 3289.9636   | 5514.7025  | 5686.0986   |           |
| 325.3878                | -14275.2914 | -1762.5921 | 0.0000      | 0.0000    |

## Supplementary Text 6

|                         |             |            |             |           |
|-------------------------|-------------|------------|-------------|-----------|
| 8177.4311               | 6955.7001   | 311.8186   | -1221.7309  | 7023.6127 |
| 312.4884                | 33.4393     | 101.9611   | 680285.8938 | -11.6919  |
| -11.6949                |             |            |             |           |
| [28637]ENERGY: 17560000 | 3327.9189   | 5437.3276  | 5687.2905   |           |
| 344.0868                | -14301.3612 | -1740.7982 | 0.0000      | 0.0000    |
| 8203.0655               | 6957.5298   | 312.7961   | -1245.5357  | 7026.0060 |
| 312.4889                | -7.9681     | -19.0705   | 680285.8938 | -11.4587  |
| -11.4536                |             |            |             |           |
| [28687]ENERGY: 17570000 | 3379.3912   | 5544.0837  | 5727.5854   |           |
| 331.8041                | -14415.5164 | -1802.3254 | 0.0000      | 0.0000    |
| 8193.3369               | 6958.3594   | 312.4251   | -1234.9774  | 7024.1247 |
| 312.7160                | -58.5721    | -83.0742   | 680285.8938 | -13.5340  |
| -13.5567                |             |            |             |           |
| [28723]ENERGY: 17580000 | 3400.7954   | 5468.4598  | 5676.8527   |           |
| 343.1121                | -14296.3631 | -1840.3816 | 0.0000      | 0.0000    |
| 8205.0902               | 6957.5654   | 312.8733   | -1247.5248  | 7024.6719 |
| 312.4617                | -201.7043   | -178.1318  | 680285.8938 | -12.9300  |
| -12.9039                |             |            |             |           |
| [28773]ENERGY: 17590000 | 3395.4164   | 5518.5019  | 5739.5223   |           |
| 353.4821                | -14375.0067 | -1771.3514 | 0.0000      | 0.0000    |
| 8101.2795               | 6961.8442   | 308.9149   | -1139.4354  | 7025.5034 |
| 312.4408                | -33.8467    | -29.6290   | 680285.8938 | -15.9813  |
| -15.9878                |             |            |             |           |
| [28812]ENERGY: 17600000 | 3379.2566   | 5501.8858  | 5702.1704   |           |
| 367.4375                | -14338.1987 | -1804.9125 | 0.0000      | 0.0000    |
| 8155.4298               | 6963.0689   | 310.9797   | -1192.3609  | 7026.9255 |
| 312.6979                | 25.4704     | 3.1830     | 680285.8938 | -14.0896  |
| -14.0810                |             |            |             |           |
| [28862]ENERGY: 17610000 | 3365.9024   | 5484.6399  | 5700.0883   |           |
| 331.7607                | -14318.0500 | -1794.2294 | 0.0000      | 0.0000    |
| 8187.0840               | 6957.1961   | 312.1867   | -1229.8880  | 7025.7472 |
| 312.5060                | -182.0122   | -124.1604  | 680285.8938 | -8.9720   |
| -8.9787                 |             |            |             |           |
| [28898]ENERGY: 17620000 | 3374.3526   | 5488.8812  | 5696.6869   |           |
| 342.2460                | -14319.9822 | -1841.8738 | 0.0000      | 0.0000    |
| 8221.4103               | 6961.7211   | 313.4956   | -1259.6892  | 7028.2074 |
| 312.7165                | 15.0781     | -65.6804   | 680285.8938 | -15.8397  |
| -15.8346                |             |            |             |           |
| [28948]ENERGY: 17630000 | 3343.0792   | 5516.6543  | 5711.2282   |           |
| 339.8495                | -14383.2534 | -1759.9311 | 0.0000      | 0.0000    |
| 8194.6154               | 6962.2420   | 312.4739   | -1232.3734  | 7027.6901 |
| 312.7114                | -67.4250    | -97.1439   | 680285.8938 | -14.7522  |
| -14.7627                |             |            |             |           |
| [28984]ENERGY: 17640000 | 3357.5184   | 5469.8034  | 5672.3597   |           |
| 332.0145                | -14306.3748 | -1795.3243 | 0.0000      | 0.0000    |
| 8229.3091               | 6959.3059   | 313.7968   | -1270.0032  | 7027.5532 |
| 312.9167                | 45.5332     | 37.2332    | 680285.8938 | -9.4459   |
| -9.4487                 |             |            |             |           |
| [29034]ENERGY: 17650000 | 3320.2331   | 5564.1428  | 5645.5301   |           |
| 345.3225                | -14351.1116 | -1843.4017 | 0.0000      | 0.0000    |
| 8278.0378               | 6958.7530   | 315.6549   | -1319.2848  | 7027.2611 |
| 312.9820                | 0.5450      | 30.6107    | 680285.8938 | -10.9061  |
| -10.8958                |             |            |             |           |
| [29070]ENERGY: 17660000 | 3325.4392   | 5536.1974  | 5685.1686   |           |

## Supplementary Text 6

|                         |             |            |             |           |
|-------------------------|-------------|------------|-------------|-----------|
| 336.7346                | -14363.3683 | -1796.2673 | 0.0000      | 0.0000    |
| 8236.8790               | 6960.7832   | 314.0855   | -1276.0957  | 7027.7272 |
| 312.9433                | -125.2628   | -103.3101  | 680285.8938 | -12.5555  |
| -12.5550                |             |            |             |           |
| [29120]ENERGY: 17670000 | 3334.4009   | 5546.0683  | 5663.1378   |           |
| 323.7771                | -14376.4416 | -1812.1430 | 0.0000      | 0.0000    |
| 8279.4071               | 6958.2065   | 315.7071   | -1321.2005  | 7026.5158 |
| 312.7204                | -45.5177    | 18.9805    | 680285.8938 | -11.5963  |
| -11.5915                |             |            |             |           |
| [29156]ENERGY: 17680000 | 3363.8828   | 5455.3714  | 5647.5894   |           |
| 330.7982                | -14297.0910 | -1796.1229 | 0.0000      | 0.0000    |
| 8256.3746               | 6960.8024   | 314.8289   | -1295.5722  | 7027.4204 |
| 312.7149                | -19.9897    | 9.6707     | 680285.8938 | -12.4061  |
| -12.4028                |             |            |             |           |
| [29206]ENERGY: 17690000 | 3354.5485   | 5502.1444  | 5668.9922   |           |
| 357.5258                | -14351.4164 | -1769.7738 | 0.0000      | 0.0000    |
| 8197.6420               | 6959.6628   | 312.5893   | -1237.9792  | 7027.5081 |
| 312.4346                | -87.9761    | -73.7179   | 680285.8938 | -14.1917  |
| -14.2075                |             |            |             |           |
| [29245]ENERGY: 17700000 | 3362.0817   | 5537.7960  | 5648.7646   |           |
| 334.7243                | -14369.2694 | -1739.6556 | 0.0000      | 0.0000    |
| 8187.3925               | 6961.8342   | 312.1985   | -1225.5583  | 7026.0760 |
| 312.5690                | -65.1931    | -76.0969   | 680285.8938 | -14.2258  |
| -14.2177                |             |            |             |           |
| [29295]ENERGY: 17710000 | 3336.2250   | 5478.6624  | 5700.1539   |           |
| 338.9818                | -14385.0559 | -1798.3626 | 0.0000      | 0.0000    |
| 8290.6781               | 6961.2828   | 316.1369   | -1329.3953  | 7027.1320 |
| 312.5469                | -42.6604    | -20.9373   | 680285.8938 | -13.3244  |
| -13.3356                |             |            |             |           |
| [29331]ENERGY: 17720000 | 3377.8646   | 5454.1288  | 5712.8355   |           |
| 316.7839                | -14269.4948 | -1816.3405 | 0.0000      | 0.0000    |
| 8181.9642               | 6957.7417   | 311.9915   | -1224.2225  | 7026.2707 |
| 312.7245                | -11.8902    | 70.6233    | 680285.8938 | -10.1688  |
| -10.1729                |             |            |             |           |
| [29381]ENERGY: 17730000 | 3337.1931   | 5484.0511  | 5650.6133   |           |
| 354.7481                | -14294.7334 | -1747.9126 | 0.0000      | 0.0000    |
| 8180.1368               | 6964.0965   | 311.9218   | -1216.0404  | 7026.7153 |
| 312.6873                | -116.8112   | -71.6000   | 680285.8938 | -12.7790  |
| -12.7658                |             |            |             |           |
| [29417]ENERGY: 17740000 | 3373.1934   | 5430.0552  | 5657.5519   |           |
| 354.6874                | -14303.7087 | -1720.2450 | 0.0000      | 0.0000    |
| 8169.9486               | 6961.4828   | 311.5333   | -1208.4658  | 7026.6838 |
| 312.7879                | -71.7167    | -59.6220   | 680285.8938 | -12.3614  |
| -12.3721                |             |            |             |           |
| [29467]ENERGY: 17750000 | 3421.9588   | 5499.8631  | 5665.3249   |           |
| 333.9399                | -14363.6790 | -1791.8354 | 0.0000      | 0.0000    |
| 8196.3728               | 6961.9450   | 312.5409   | -1234.4278  | 7028.2167 |
| 312.7731                | 52.2874     | 24.3202    | 680285.8938 | -10.3334  |
| -10.3215                |             |            |             |           |
| [29503]ENERGY: 17760000 | 3370.7982   | 5463.2461  | 5692.0733   |           |
| 348.4911                | -14337.9355 | -1732.3545 | 0.0000      | 0.0000    |
| 8157.9240               | 6962.2426   | 311.0748   | -1195.6814  | 7028.0105 |
| 312.8007                | -75.0521    | -65.4842   | 680285.8938 | -12.8486  |
| -12.8427                |             |            |             |           |

## Supplementary Text 6

|                         |             |            |             |           |
|-------------------------|-------------|------------|-------------|-----------|
| [29553]ENERGY: 17770000 | 3316.4871   | 5598.6197  | 5672.0808   |           |
| 347.1143                | -14443.2302 | -1729.2509 | 0.0000      | 0.0000    |
| 8203.3910               | 6965.2118   | 312.8085   | -1238.1792  | 7028.4763 |
| 312.8721                | 85.6823     | 80.9410    | 680285.8938 | -14.2364  |
| -14.2486                |             |            |             |           |
| [29589]ENERGY: 17780000 | 3362.0902   | 5466.2973  | 5708.0374   |           |
| 339.9385                | -14313.7588 | -1776.9063 | 0.0000      | 0.0000    |
| 8177.0580               | 6962.7564   | 311.8044   | -1214.3017  | 7028.3897 |
| 313.0383                | 17.6781     | -47.4311   | 680285.8938 | -11.2848  |
| -11.2931                |             |            |             |           |
| [29639]ENERGY: 17790000 | 3387.4204   | 5522.4336  | 5673.5389   |           |
| 346.0880                | -14322.3397 | -1834.2894 | 0.0000      | 0.0000    |
| 8190.6883               | 6963.5401   | 312.3242   | -1227.1482  | 7029.3571 |
| 313.1195                | -90.5202    | -115.5634  | 680285.8938 | -12.8142  |
| -12.8030                |             |            |             |           |
| [29678]ENERGY: 17800000 | 3337.0990   | 5499.9196  | 5691.4824   |           |
| 324.6972                | -14337.9244 | -1748.3495 | 0.0000      | 0.0000    |
| 8193.3848               | 6960.3091   | 312.4270   | -1233.0757  | 7028.9482 |
| 313.1247                | 30.8078     | -4.4766    | 680285.8938 | -11.6006  |
| -11.6248                |             |            |             |           |
| [29728]ENERGY: 17810000 | 3392.7899   | 5472.1048  | 5662.8819   |           |
| 361.3869                | -14381.1423 | -1779.8406 | 0.0000      | 0.0000    |
| 8234.6199               | 6962.8006   | 313.9993   | -1271.8193  | 7030.2787 |
| 313.1965                | 24.1700     | -33.0706   | 680285.8938 | -6.8204   |
| -6.7954                 |             |            |             |           |
| [29764]ENERGY: 17820000 | 3315.8747   | 5505.5149  | 5675.9408   |           |
| 347.5576                | -14418.4267 | -1719.0582 | 0.0000      | 0.0000    |
| 8257.0952               | 6964.4982   | 314.8564   | -1292.5970  | 7031.0038 |
| 313.0892                | 273.5173    | 100.2741   | 680285.8938 | -10.0289  |
| -10.0256                |             |            |             |           |
| [29814]ENERGY: 17830000 | 3364.0339   | 5412.6317  | 5679.7783   |           |
| 325.6652                | -14352.9111 | -1761.7412 | 0.0000      | 0.0000    |
| 8294.7833               | 6962.2402   | 316.2935   | -1332.5431  | 7030.7991 |
| 313.0998                | 50.3222     | 27.6872    | 680285.8938 | -10.3636  |
| -10.3678                |             |            |             |           |
| [29850]ENERGY: 17840000 | 3342.8707   | 5505.0823  | 5647.1720   |           |
| 326.7627                | -14374.6001 | -1719.5156 | 0.0000      | 0.0000    |
| 8239.0110               | 6966.7830   | 314.1668   | -1272.2280  | 7031.9627 |
| 312.9553                | 135.5109    | 23.9259    | 680285.8938 | -12.9836  |
| -12.9978                |             |            |             |           |
| [29900]ENERGY: 17850000 | 3402.6350   | 5488.0475  | 5690.9461   |           |
| 356.1780                | -14399.3745 | -1782.7212 | 0.0000      | 0.0000    |
| 8215.1211               | 6970.8321   | 313.2558   | -1244.2890  | 7031.6492 |
| 313.0417                | 130.0146    | 39.4693    | 680285.8938 | -11.6595  |
| -11.6464                |             |            |             |           |
| [29936]ENERGY: 17860000 | 3323.2855   | 5485.0441  | 5677.8631   |           |
| 363.8373                | -14326.6824 | -1771.9110 | 0.0000      | 0.0000    |
| 8213.4983               | 6964.9349   | 313.1939   | -1248.5634  | 7030.8938 |
| 313.1817                | 108.8319    | 104.4510   | 680285.8938 | -10.6053  |
| -10.6140                |             |            |             |           |
| [29986]ENERGY: 17870000 | 3412.1538   | 5519.9839  | 5678.9758   |           |
| 337.5410                | -14387.0465 | -1754.5331 | 0.0000      | 0.0000    |
| 8159.7476               | 6966.8224   | 311.1443   | -1192.9252  | 7031.5070 |
| 313.0057                | 56.5645     | 85.1057    | 680285.8938 | -5.8493   |

Supplementary Text 6

-5.8256  
 [30022]ENERGY: 17880000      3424.5097      5439.8043      5676.6838  
 350.5812      -14315.1104      -1755.9044      0.0000      0.0000  
 8145.9860      6966.5502      310.6196      -1179.4358      7030.5257  
 312.9841      -21.9729      -2.6138      680285.8938      -10.0782  
 -10.0920  
 [30072]ENERGY: 17890000      3341.1605      5525.1608      5654.2229  
 329.7551      -14338.8636      -1693.1173      0.0000      0.0000  
 8152.1325      6970.4510      310.8540      -1181.6815      7031.0924  
 312.9034      57.0861      11.9113      680285.8938      -7.9650  
 -7.9659  
 [30111]ENERGY: 17900000      3352.1935      5534.0915      5637.6740  
 333.1349      -14330.7172      -1751.4902      0.0000      0.0000  
 8190.8565      6965.7431      312.3306      -1225.1134      7031.0167  
 312.9302      10.6404      -17.7020      680285.8938      -13.3312  
 -13.3355  
 [30161]ENERGY: 17910000      3470.4181      5559.7427      5700.0818  
 360.0501      -14410.3853      -1767.2059      0.0000      0.0000  
 8056.5992      6969.3008      307.2111      -1087.2984      7032.4722  
 313.0849      35.9565      21.3588      680285.8938      -11.7788  
 -11.7717  
 [30197]ENERGY: 17920000      3416.0397      5454.9601      5634.0108  
 316.9686      -14291.6406      -1789.0906      0.0000      0.0000  
 8225.5566      6966.8046      313.6537      -1258.7520      7033.1546  
 312.9684      -12.0563      -53.4054      680285.8938      -11.9518  
 -11.9625  
 [30247]ENERGY: 17930000      3352.5042      5453.5629      5638.0062  
 358.5880      -14292.1764      -1759.4689      0.0000      0.0000  
 8214.4126      6965.4287      313.2288      -1248.9839      7032.9093  
 312.9870      25.1673      39.7122      680285.8938      -13.5368  
 -13.5287  
 [30283]ENERGY: 17940000      3336.6582      5380.3161      5701.7953  
 354.1266      -14335.0687      -1766.8073      0.0000      0.0000  
 8296.7120      6967.7323      316.3670      -1328.9797      7033.9948  
 312.9011      159.0405      80.4038      680285.8938      -14.6371  
 -14.6453  
 [30333]ENERGY: 17950000      3448.2907      5548.7601      5701.3529  
 358.0281      -14377.1611      -1809.3676      0.0000      0.0000  
 8101.8196      6971.7226      308.9354      -1130.0970      7033.7826  
 312.9904      88.8342      -10.8283      680285.8938      -10.7852  
 -10.7767  
 [30369]ENERGY: 17960000      3396.1414      5562.9154      5704.7134  
 324.4090      -14426.2681      -1831.7287      0.0000      0.0000  
 8231.3684      6961.5508      313.8754      -1269.8176      7032.8259  
 313.0323      -251.5640      -184.4323      680285.8938      -13.0956  
 -13.0990  
 [30419]ENERGY: 17970000      3374.6011      5430.0972      5690.6094  
 338.0130      -14349.7907      -1771.0381      0.0000      0.0000  
 8254.7262      6967.2180      314.7660      -1287.5082      7032.2433  
 313.0485      -89.5415      -100.8899      680285.8938      -10.1898  
 -10.1751  
 [30455]ENERGY: 17980000      3302.7917      5531.6148      5710.3072  
 329.8023      -14296.8093      -1809.0067      0.0000      0.0000  
 8194.3797      6963.0795      312.4649      -1231.3002      7032.1494

## Supplementary Text 6

|                         |             |            |             |           |
|-------------------------|-------------|------------|-------------|-----------|
| 312.9702                | 57.9351     | 42.1531    | 680285.8938 | -13.6772  |
| -13.6954                |             |            |             |           |
| [30505]ENERGY: 17990000 | 3344.3010   | 5412.5093  | 5690.0188   |           |
| 356.9889                | -14293.3044 | -1816.9555 | 0.0000      | 0.0000    |
| 8270.5340               | 6964.0922   | 315.3688   | -1306.4418  | 7032.0073 |
| 312.9214                | 9.2389      | -20.4913   | 680285.8938 | -16.0718  |
| -16.0700                |             |            |             |           |
| [30544]ENERGY: 18000000 | 3357.5670   | 5512.7625  | 5667.7366   |           |
| 338.6491                | -14331.7950 | -1801.9036 | 0.0000      | 0.0000    |
| 8221.3226               | 6964.3392   | 313.4923   | -1256.9834  | 7031.6349 |
| 312.8020                | -16.9692    | -40.9806   | 680285.8938 | -8.3696   |
| -8.3795                 |             |            |             |           |
| [30594]ENERGY: 18010000 | 3359.6674   | 5433.2911  | 5661.3646   |           |
| 351.1745                | -14370.4917 | -1759.1860 | 0.0000      | 0.0000    |
| 8287.8709               | 6963.6909   | 316.0299   | -1324.1801  | 7032.4807 |
| 312.7902                | 18.0528     | -116.0171  | 680285.8938 | -10.4623  |
| -10.4480                |             |            |             |           |
| [30630]ENERGY: 18020000 | 3359.0286   | 5469.7633  | 5624.3350   |           |
| 328.4172                | -14304.7538 | -1780.2690 | 0.0000      | 0.0000    |
| 8269.5283               | 6966.0496   | 315.3305   | -1303.4787  | 7032.0212 |
| 312.8511                | 19.1161     | 11.8734    | 680285.8938 | -10.0472  |
| -10.0415                |             |            |             |           |
| [30680]ENERGY: 18030000 | 3298.5261   | 5487.7070  | 5645.2097   |           |
| 327.0928                | -14287.7747 | -1779.8584 | 0.0000      | 0.0000    |
| 8275.8868               | 6966.7894   | 315.5729   | -1309.0974  | 7033.3711 |
| 312.9277                | 73.8177     | 41.5167    | 680285.8938 | -17.0584  |
| -17.0699                |             |            |             |           |
| [30716]ENERGY: 18040000 | 3438.0181   | 5537.9531  | 5682.9904   |           |
| 352.5684                | -14409.6903 | -1841.3699 | 0.0000      | 0.0000    |
| 8205.6136               | 6966.0834   | 312.8933   | -1239.5302  | 7032.2657 |
| 313.0828                | -23.5412    | -69.1437   | 680285.8938 | -10.6044  |
| -10.6080                |             |            |             |           |
| [30766]ENERGY: 18050000 | 3428.9482   | 5615.4318  | 5669.5508   |           |
| 322.2216                | -14419.5434 | -1770.0292 | 0.0000      | 0.0000    |
| 8122.3480               | 6968.9278   | 309.7182   | -1153.4202  | 7032.9490 |
| 313.2277                | -57.6412    | -56.5710   | 680285.8938 | -12.4243  |
| -12.4261                |             |            |             |           |
| [30802]ENERGY: 18060000 | 3309.4106   | 5526.6678  | 5673.4278   |           |
| 339.1779                | -14346.3926 | -1756.6269 | 0.0000      | 0.0000    |
| 8219.1995               | 6964.8642   | 313.4113   | -1254.3354  | 7032.1062 |
| 313.0034                | 229.7018    | 118.9308   | 680285.8938 | -9.3515   |
| -9.3422                 |             |            |             |           |
| [30852]ENERGY: 18070000 | 3266.3078   | 5474.1694  | 5711.0917   |           |
| 315.2362                | -14282.7696 | -1790.4538 | 0.0000      | 0.0000    |
| 8273.5868               | 6967.1685   | 315.4852   | -1306.4183  | 7033.5802 |
| 312.8978                | 110.2935    | 110.5656   | 680285.8938 | -14.0363  |
| -14.0532                |             |            |             |           |
| [30888]ENERGY: 18080000 | 3368.1667   | 5542.4306  | 5688.3790   |           |
| 361.9315                | -14299.9612 | -1837.1467 | 0.0000      | 0.0000    |
| 8143.1892               | 6966.9892   | 310.5129   | -1176.2000  | 7033.3709 |
| 312.9382                | -90.1857    | -38.6684   | 680285.8938 | -13.9364  |
| -13.9170                |             |            |             |           |
| [30938]ENERGY: 18090000 | 3477.6077   | 5484.2097  | 5646.6847   |           |
| 336.2028                | -14278.7729 | -1827.8306 | 0.0000      | 0.0000    |

## Supplementary Text 6

|                         |             |            |             |           |
|-------------------------|-------------|------------|-------------|-----------|
| 8129.8425               | 6967.9439   | 310.0040   | -1161.8986  | 7034.2246 |
| 312.9658                | -71.4651    | -103.0802  | 680285.8938 | -8.2146   |
| -8.2234                 |             |            |             |           |
| [30977]ENERGY: 18100000 | 3382.2025   | 5542.2991  | 5622.5314   |           |
| 337.3588                | -14243.1340 | -1773.1841 | 0.0000      | 0.0000    |
| 8100.4824               | 6968.5562   | 308.8845   | -1131.9262  | 7033.9432 |
| 312.9421                | 12.3331     | -0.2208    | 680285.8938 | -13.7118  |
| -13.7000                |             |            |             |           |
| [31027]ENERGY: 18110000 | 3344.8057   | 5550.8685  | 5619.1415   |           |
| 338.0701                | -14489.7104 | -1701.6958 | 0.0000      | 0.0000    |
| 8302.3223               | 6963.8021   | 316.5809   | -1338.5203  | 7033.9205 |
| 312.9928                | 149.1417    | 123.3248   | 680285.8938 | -12.4158  |
| -12.4306                |             |            |             |           |
| [31063]ENERGY: 18120000 | 3340.4135   | 5496.2085  | 5674.4489   |           |
| 352.4922                | -14325.5083 | -1849.6168 | 0.0000      | 0.0000    |
| 8279.9351               | 6968.3731   | 315.7273   | -1311.5620  | 7034.1590 |
| 313.0583                | 77.3355     | 24.0422    | 680285.8938 | -15.6628  |
| -15.6523                |             |            |             |           |
| [31113]ENERGY: 18130000 | 3278.6926   | 5498.7609  | 5700.0273   |           |
| 336.3434                | -14327.3472 | -1825.3257 | 0.0000      | 0.0000    |
| 8301.5081               | 6962.6594   | 316.5499   | -1338.8487  | 7034.5168 |
| 313.0587                | 26.4487     | -51.5605   | 680285.8938 | -10.4893  |
| -10.4796                |             |            |             |           |
| [31149]ENERGY: 18140000 | 3235.1729   | 5527.4670  | 5667.9245   |           |
| 351.8660                | -14270.5907 | -1832.3300 | 0.0000      | 0.0000    |
| 8289.3723               | 6968.8820   | 316.0871   | -1320.4904  | 7035.5418 |
| 313.1021                | 176.5619    | 51.2880    | 680285.8938 | -13.0482  |
| -13.0620                |             |            |             |           |
| [31199]ENERGY: 18150000 | 3318.4193   | 5467.6347  | 5651.4146   |           |
| 366.6660                | -14332.6639 | -1731.7678 | 0.0000      | 0.0000    |
| 8226.5730               | 6966.2758   | 313.6925   | -1260.2972  | 7034.2360 |
| 313.1120                | 28.6504     | 11.9799    | 680285.8938 | -18.0474  |
| -18.0374                |             |            |             |           |
| [31235]ENERGY: 18160000 | 3357.8334   | 5593.8807  | 5648.8286   |           |
| 348.8636                | -14351.9563 | -1783.9850 | 0.0000      | 0.0000    |
| 8155.8975               | 6969.3626   | 310.9975   | -1186.5349  | 7034.8884 |
| 313.1940                | 11.8960     | 56.0966    | 680285.8938 | -14.0594  |
| -14.0602                |             |            |             |           |
| [31285]ENERGY: 18170000 | 3330.0827   | 5563.2400  | 5695.7080   |           |
| 337.6582                | -14386.0240 | -1771.0725 | 0.0000      | 0.0000    |
| 8202.6068               | 6972.1990   | 312.7786   | -1230.4078  | 7036.3060 |
| 313.2219                | 117.8029    | 172.5479   | 680285.8938 | -15.4950  |
| -15.4936                |             |            |             |           |
| [31321]ENERGY: 18180000 | 3284.4194   | 5477.0750  | 5684.2375   |           |
| 348.2345                | -14263.5179 | -1786.3860 | 0.0000      | 0.0000    |
| 8227.7540               | 6971.8166   | 313.7375   | -1255.9375  | 7036.8848 |
| 313.0822                | -71.7821    | -33.0461   | 680285.8938 | -15.0096  |
| -15.0064                |             |            |             |           |
| [31371]ENERGY: 18190000 | 3395.7346   | 5572.2613  | 5688.2821   |           |
| 332.1771                | -14277.8159 | -1881.5229 | 0.0000      | 0.0000    |
| 8143.1812               | 6972.2976   | 310.5126   | -1170.8836  | 7035.9244 |
| 312.9615                | -221.2317   | -174.2072  | 680285.8938 | -16.4219  |
| -16.4312                |             |            |             |           |
| [31410]ENERGY: 18200000 | 3268.0192   | 5479.7340  | 5621.8666   |           |



## Supplementary Text 6

|                         |             |            |             |           |
|-------------------------|-------------|------------|-------------|-----------|
| 345.0737                | -14199.8082 | -1806.5245 | 0.0000      | 0.0000    |
| 8265.7523               | 6974.1130   | 315.1865   | -1291.6393  | 7037.8142 |
| 313.1146                | 156.0449    | 40.5862    | 680285.8938 | -16.0898  |
| -16.0925                |             |            |             |           |
| [31460]ENERGY: 18210000 | 3342.3840   | 5599.3878  | 5666.6824   |           |
| 330.2101                | -14316.2286 | -1810.2583 | 0.0000      | 0.0000    |
| 8158.3626               | 6970.5400   | 311.0915   | -1187.8227  | 7038.2362 |
| 312.8633                | -90.9150    | -196.1605  | 680285.8938 | -14.7233  |
| -14.7241                |             |            |             |           |
| [31496]ENERGY: 18220000 | 3319.7985   | 5492.9696  | 5686.9943   |           |
| 342.5678                | -14399.0599 | -1768.7780 | 0.0000      | 0.0000    |
| 8298.1315               | 6972.6238   | 316.4211   | -1325.5077  | 7038.3300 |
| 313.1256                | 38.6165     | 23.6803    | 680285.8938 | -14.8110  |
| -14.8102                |             |            |             |           |
| [31546]ENERGY: 18230000 | 3388.0382   | 5513.5160  | 5721.3857   |           |
| 361.7292                | -14398.3459 | -1839.9627 | 0.0000      | 0.0000    |
| 8224.0192               | 6970.3796   | 313.5951   | -1253.6395  | 7038.3659 |
| 313.1592                | -31.4053    | -81.5625   | 680285.8938 | -14.6504  |
| -14.6519                |             |            |             |           |
| [31582]ENERGY: 18240000 | 3356.5507   | 5630.1234  | 5683.8847   |           |
| 353.2084                | -14299.4552 | -1862.5737 | 0.0000      | 0.0000    |
| 8112.6457               | 6974.3840   | 309.3483   | -1138.2617  | 7039.4347 |
| 313.1475                | -8.5930     | -39.5004   | 680285.8938 | -14.2049  |
| -14.1910                |             |            |             |           |
| [31632]ENERGY: 18250000 | 3306.7684   | 5549.1394  | 5691.2115   |           |
| 339.3534                | -14249.8118 | -1812.2287 | 0.0000      | 0.0000    |
| 8150.0551               | 6974.4873   | 310.7747   | -1175.5677  | 7038.4481 |
| 313.0530                | -29.4627    | 23.4718    | 680285.8938 | -14.8907  |
| -14.8999                |             |            |             |           |
| [31668]ENERGY: 18260000 | 3369.8948   | 5560.5967  | 5681.9096   |           |
| 332.4504                | -14309.9221 | -1787.3891 | 0.0000      | 0.0000    |
| 8126.0159               | 6973.5563   | 309.8581   | -1152.4596  | 7037.5235 |
| 313.0266                | -70.0308    | -23.4130   | 680285.8938 | -15.6169  |
| -15.6175                |             |            |             |           |
| [31718]ENERGY: 18270000 | 3423.0441   | 5466.6650  | 5667.2490   |           |
| 342.2743                | -14345.0449 | -1810.3271 | 0.0000      | 0.0000    |
| 8226.9046               | 6970.7649   | 313.7051   | -1256.1397  | 7039.2456 |
| 312.8867                | -77.9966    | -115.7201  | 680285.8938 | -16.1440  |
| -16.1499                |             |            |             |           |
| [31754]ENERGY: 18280000 | 3404.4714   | 5456.9461  | 5639.6889   |           |
| 337.1005                | -14437.4431 | -1661.1347 | 0.0000      | 0.0000    |
| 8232.2872               | 6971.9165   | 313.9104   | -1260.3707  | 7039.0750 |
| 312.9626                | 93.3778     | 28.9111    | 680285.8938 | -12.2407  |
| -12.2279                |             |            |             |           |
| [31804]ENERGY: 18290000 | 3298.2921   | 5582.9068  | 5654.3265   |           |
| 354.7421                | -14370.4709 | -1766.1617 | 0.0000      | 0.0000    |
| 8217.8599               | 6971.4949   | 313.3602   | -1246.3650  | 7039.5691 |
| 313.0580                | -113.1872   | -124.7288  | 680285.8938 | -12.6352  |
| -12.6464                |             |            |             |           |
| [31843]ENERGY: 18300000 | 3362.4384   | 5573.7036  | 5654.6973   |           |
| 339.5948                | -14407.4884 | -1772.1018 | 0.0000      | 0.0000    |
| 8222.6803               | 6973.5242   | 313.5441   | -1249.1561  | 7039.1234 |
| 313.0691                | 133.7689    | 63.8925    | 680285.8938 | -13.0739  |
| -13.0661                |             |            |             |           |

## Supplementary Text 6

|                         |             |            |             |           |
|-------------------------|-------------|------------|-------------|-----------|
| [31893]ENERGY: 18310000 | 3297.5255   | 5571.8048  | 5658.6294   |           |
| 359.1872                | -14360.2859 | -1758.1253 | 0.0000      | 0.0000    |
| 8203.4499               | 6972.1856   | 312.8108   | -1231.2642  | 7039.0829 |
| 313.1044                | 98.7343     | 49.8441    | 680285.8938 | -15.0010  |
| -15.0010                |             |            |             |           |
| [31929]ENERGY: 18320000 | 3360.1755   | 5507.3306  | 5657.9467   |           |
| 357.5839                | -14393.0765 | -1813.1662 | 0.0000      | 0.0000    |
| 8294.5940               | 6971.3881   | 316.2862   | -1323.2059  | 7037.5571 |
| 313.2215                | 14.3446     | -28.0483   | 680285.8938 | -11.4982  |
| -11.5072                |             |            |             |           |
| [31979]ENERGY: 18330000 | 3324.0640   | 5499.3209  | 5688.6169   |           |
| 352.6020                | -14261.8899 | -1822.0711 | 0.0000      | 0.0000    |
| 8195.4811               | 6976.1240   | 312.5069   | -1219.3571  | 7037.5534 |
| 313.0659                | -52.4428    | -49.4548   | 680285.8938 | -9.5341   |
| -9.5193                 |             |            |             |           |
| [32015]ENERGY: 18340000 | 3331.4506   | 5454.2500  | 5653.2184   |           |
| 322.6650                | -14281.8167 | -1771.6474 | 0.0000      | 0.0000    |
| 8262.6469               | 6970.7669   | 315.0681   | -1291.8800  | 7038.8099 |
| 313.0145                | 129.4113    | 24.8200    | 680285.8938 | -10.6719  |
| -10.6761                |             |            |             |           |
| [32065]ENERGY: 18350000 | 3420.4993   | 5510.6547  | 5681.6166   |           |
| 365.9105                | -14339.4318 | -1783.0418 | 0.0000      | 0.0000    |
| 8119.2986               | 6975.5060   | 309.6019   | -1143.7925  | 7038.3376 |
| 312.9371                | 73.9190     | -27.2573   | 680285.8938 | -14.1858  |
| -14.1871                |             |            |             |           |
| [32101]ENERGY: 18360000 | 3346.1649   | 5562.1691  | 5697.6787   |           |
| 347.3973                | -14360.2664 | -1765.0420 | 0.0000      | 0.0000    |
| 8147.5611               | 6975.6627   | 310.6796   | -1171.8984  | 7037.3439 |
| 313.1398                | -153.5359   | -99.6763   | 680285.8938 | -12.5382  |
| -12.5371                |             |            |             |           |
| [32151]ENERGY: 18370000 | 3392.8409   | 5494.1331  | 5671.5104   |           |
| 334.3497                | -14277.1664 | -1862.6057 | 0.0000      | 0.0000    |
| 8219.2489               | 6972.3110   | 313.4132   | -1246.9379  | 7038.3325 |
| 313.2114                | -119.6308   | -119.6264  | 680285.8938 | -13.6328  |
| -13.6369                |             |            |             |           |
| [32187]ENERGY: 18380000 | 3377.1640   | 5537.8183  | 5639.1261   |           |
| 341.7657                | -14283.1760 | -1826.4224 | 0.0000      | 0.0000    |
| 8188.9945               | 6975.2702   | 312.2596   | -1213.7243  | 7039.2252 |
| 313.0599                | -127.9779   | -102.2330  | 680285.8938 | -14.2022  |
| -14.2031                |             |            |             |           |
| [32237]ENERGY: 18390000 | 3363.6511   | 5556.1861  | 5691.6065   |           |
| 341.2036                | -14325.4849 | -1846.7177 | 0.0000      | 0.0000    |
| 8194.1055               | 6974.5503   | 312.4545   | -1219.5552  | 7040.1185 |
| 313.0616                | 145.4768    | 75.4949    | 680285.8938 | -13.1855  |
| -13.1766                |             |            |             |           |
| [32276]ENERGY: 18400000 | 3396.6330   | 5494.5124  | 5704.1774   |           |
| 328.0670                | -14256.3267 | -1876.2740 | 0.0000      | 0.0000    |
| 8183.6500               | 6974.4391   | 312.0558   | -1209.2109  | 7040.9426 |
| 312.9519                | 75.8979     | -1.4516    | 680285.8938 | -12.5706  |
| -12.5699                |             |            |             |           |
| [32326]ENERGY: 18410000 | 3387.4103   | 5497.5303  | 5676.0852   |           |
| 347.6902                | -14272.6365 | -1860.9997 | 0.0000      | 0.0000    |
| 8198.4432               | 6973.5231   | 312.6199   | -1224.9201  | 7041.4566 |
| 312.9624                | -26.8748    | -39.9170   | 680285.8938 | -15.6586  |

## Supplementary Text 6

-15.6453  
[32362]ENERGY: 18420000      3256.1138      5448.0641      5703.9854  
354.8964      -14261.1780      -1781.8945      0.0000      0.0000  
8252.7201      6972.7073      314.6895      -1280.0128      7042.1434  
313.0904      123.8688      62.0632      680285.8938      -10.1134  
-10.1255  
[32412]ENERGY: 18430000      3470.1150      5529.0378      5655.4150  
326.8636      -14320.0124      -1792.6118      0.0000      0.0000  
8109.4047      6978.2120      309.2247      -1131.1927      7041.8089  
312.9224      -140.3678      -85.5951      680285.8938      -17.8983  
-17.9074  
[32448]ENERGY: 18440000      3373.0793      5444.7328      5631.7583  
334.6077      -14314.0062      -1729.6778      0.0000      0.0000  
8233.0206      6973.5145      313.9384      -1259.5061      7040.6165  
313.0946      24.5708      30.5658      680285.8938      -13.2065  
-13.2087  
[32498]ENERGY: 18450000      3441.0880      5568.0553      5677.2728  
353.1617      -14352.4834      -1902.4230      0.0000      0.0000  
8191.3918      6976.0632      312.3510      -1215.3286      7042.3803  
313.0687      -142.5355      -174.6777      680285.8938      -12.7631  
-12.7647  
[32534]ENERGY: 18460000      3320.5819      5532.5214      5638.2786  
356.9474      -14296.8112      -1782.7603      0.0000      0.0000  
8208.9691      6977.7270      313.0212      -1231.2421      7041.8579  
313.1268      87.4723      9.0274      680285.8938      -13.6246  
-13.6483  
[32584]ENERGY: 18470000      3291.9436      5652.7218      5664.7978  
320.6841      -14396.9600      -1833.6965      0.0000      0.0000  
8272.5233      6972.0140      315.4447      -1300.5092      7041.6070  
313.1496      104.0776      -6.3497      680285.8938      -12.8375  
-12.8169  
[32620]ENERGY: 18480000      3349.5831      5452.2906      5676.7941  
358.6345      -14365.1103      -1781.6511      0.0000      0.0000  
8281.1827      6971.7236      315.7748      -1309.4591      7042.0370  
312.9816      -145.7589      -121.5133      680285.8938      -17.0168  
-17.0168  
[32670]ENERGY: 18490000      3384.6142      5501.4084      5693.2333  
346.8417      -14339.0812      -1819.0841      0.0000      0.0000  
8208.1215      6976.0539      312.9889      -1232.0676      7041.0267  
312.8683      -124.6335      -190.4461      680285.8938      -14.4500  
-14.4485  
[32709]ENERGY: 18500000      3346.9998      5489.9720      5648.9152  
336.8998      -14292.9321      -1778.1747      0.0000      0.0000  
8223.3806      6975.0605      313.5708      -1248.3201      7042.3121  
312.9632      -151.1339      -116.5352      680285.8938      -12.3793  
-12.3683  
[32759]ENERGY: 18510000      3379.2603      5544.2302      5694.4711  
322.9303      -14372.8887      -1785.5296      0.0000      0.0000  
8193.7310      6976.2047      312.4402      -1217.5263      7042.9206  
312.9601      146.4267      53.0338      680285.8938      -11.6456  
-11.6696  
[32795]ENERGY: 18520000      3351.9102      5571.1094      5682.4568  
340.0032      -14339.9388      -1789.8288      0.0000      0.0000  
8162.7770      6978.4890      311.2599      -1184.2880      7043.2460

## Supplementary Text 6

|                         |             |            |             |           |
|-------------------------|-------------|------------|-------------|-----------|
| 312.9947                | -15.8136    | 41.8662    | 680285.8938 | -14.0054  |
| -13.9860                |             |            |             |           |
| [32845]ENERGY: 18530000 | 3263.8523   | 5546.2773  | 5687.1519   |           |
| 344.6200                | -14351.4126 | -1805.6434 | 0.0000      | 0.0000    |
| 8288.2572               | 6973.1026   | 316.0446   | -1315.1546  | 7042.4996 |
| 313.1103                | 92.5967     | 46.9917    | 680285.8938 | -12.0804  |
| -12.0872                |             |            |             |           |
| [32881]ENERGY: 18540000 | 3479.0791   | 5480.4788  | 5663.5614   |           |
| 339.2775                | -14364.7841 | -1786.4041 | 0.0000      | 0.0000    |
| 8167.3961               | 6978.6047   | 311.4360   | -1188.7914  | 7043.8695 |
| 313.1439                | -211.5185   | -211.0159  | 680285.8938 | -12.1157  |
| -12.1020                |             |            |             |           |
| [32931]ENERGY: 18550000 | 3338.9754   | 5558.9238  | 5649.6239   |           |
| 331.7121                | -14309.1479 | -1829.0311 | 0.0000      | 0.0000    |
| 8236.3645               | 6977.4206   | 314.0659   | -1258.9439  | 7043.2659 |
| 313.0829                | -126.5601   | -98.9443   | 680285.8938 | -11.9740  |
| -11.9869                |             |            |             |           |
| [32967]ENERGY: 18560000 | 3341.2290   | 5454.6652  | 5700.3480   |           |
| 322.8933                | -14322.9273 | -1790.2773 | 0.0000      | 0.0000    |
| 8271.4479               | 6977.3787   | 315.4036   | -1294.0692  | 7043.4645 |
| 313.0861                | 57.1289     | 78.3522    | 680285.8938 | -10.1958  |
| -10.1925                |             |            |             |           |
| [33017]ENERGY: 18570000 | 3347.9583   | 5603.9095  | 5627.8145   |           |
| 348.6426                | -14302.2819 | -1791.1097 | 0.0000      | 0.0000    |
| 8142.2978               | 6977.2311   | 310.4789   | -1165.0667  | 7042.6281 |
| 313.0307                | 89.9022     | 110.0664   | 680285.8938 | -13.4105  |
| -13.4124                |             |            |             |           |
| [33053]ENERGY: 18580000 | 3336.9285   | 5612.2695  | 5681.9756   |           |
| 373.6323                | -14290.4156 | -1849.0720 | 0.0000      | 0.0000    |
| 8112.3473               | 6977.6655   | 309.3369   | -1134.6818  | 7042.4514 |
| 313.0920                | 45.7861     | 22.6960    | 680285.8938 | -14.4728  |
| -14.4732                |             |            |             |           |
| [33103]ENERGY: 18590000 | 3405.8813   | 5447.9177  | 5662.2785   |           |
| 352.1250                | -14244.0625 | -1882.2571 | 0.0000      | 0.0000    |
| 8235.1820               | 6977.0648   | 314.0208   | -1258.1172  | 7043.5987 |
| 313.0718                | -93.1960    | -75.0535   | 680285.8938 | -15.9836  |
| -15.9702                |             |            |             |           |
| [33142]ENERGY: 18600000 | 3374.7252   | 5522.3296  | 5673.1560   |           |
| 361.1261                | -14307.4486 | -1815.0526 | 0.0000      | 0.0000    |
| 8173.1747               | 6982.0104   | 311.6563   | -1191.1643  | 7044.6469 |
| 313.0808                | -94.4392    | -59.6947   | 680285.8938 | -12.5645  |
| -12.5750                |             |            |             |           |
| [33192]ENERGY: 18610000 | 3316.8880   | 5614.9473  | 5675.8160   |           |
| 338.1807                | -14334.0680 | -1845.3360 | 0.0000      | 0.0000    |
| 8210.0216               | 6976.4495   | 313.0614   | -1233.5721  | 7044.2314 |
| 312.9525                | 21.2711     | -39.1372   | 680285.8938 | -16.6967  |
| -16.7065                |             |            |             |           |
| [33228]ENERGY: 18620000 | 3400.5807   | 5487.2617  | 5655.2691   |           |
| 325.2619                | -14221.9971 | -1856.8999 | 0.0000      | 0.0000    |
| 8187.2241               | 6976.7006   | 312.1921   | -1210.5235  | 7043.5238 |
| 313.0623                | -272.8356   | -175.9326  | 680285.8938 | -13.0855  |
| -13.0792                |             |            |             |           |
| [33278]ENERGY: 18630000 | 3319.9382   | 5507.2780  | 5645.7286   |           |
| 322.5770                | -14228.6989 | -1831.9173 | 0.0000      | 0.0000    |

## Supplementary Text 6

|                         |             |            |             |           |
|-------------------------|-------------|------------|-------------|-----------|
| 8244.1964               | 6979.1020   | 314.3645   | -1265.0944  | 7044.6961 |
| 312.9675                | -36.7339    | 36.6922    | 680285.8938 | -14.1726  |
| -14.1681                |             |            |             |           |
| [33314]ENERGY: 18640000 | 3413.9335   | 5409.5088  | 5694.7666   |           |
| 344.4862                | -14343.8526 | -1760.4275 | 0.0000      | 0.0000    |
| 8218.1536               | 6976.5686   | 313.3714   | -1241.5850  | 7044.4774 |
| 313.1002                | 81.2899     | 18.1928    | 680285.8938 | -14.6408  |
| -14.6521                |             |            |             |           |
| [33364]ENERGY: 18650000 | 3412.1774   | 5421.6457  | 5678.4072   |           |
| 335.7471                | -14305.8574 | -1820.5948 | 0.0000      | 0.0000    |
| 8257.1457               | 6978.6709   | 314.8583   | -1278.4748  | 7043.1794 |
| 313.0186                | -29.7739    | -85.1333   | 680285.8938 | -11.0395  |
| -11.0350                |             |            |             |           |
| [33400]ENERGY: 18660000 | 3433.5617   | 5491.6400  | 5667.6428   |           |
| 360.2466                | -14361.1326 | -1762.9769 | 0.0000      | 0.0000    |
| 8152.7485               | 6981.7299   | 310.8774   | -1171.0186  | 7044.7600 |
| 312.9894                | -60.0791    | -84.3370   | 680285.8938 | -9.6766   |
| -9.6641                 |             |            |             |           |
| [33450]ENERGY: 18670000 | 3386.5832   | 5399.6034  | 5702.9782   |           |
| 355.1941                | -14416.8860 | -1730.5772 | 0.0000      | 0.0000    |
| 8277.9516               | 6974.8473   | 315.6516   | -1303.1043  | 7043.8881 |
| 312.9775                | -52.9773    | 15.1734    | 680285.8938 | -15.0122  |
| -15.0120                |             |            |             |           |
| [33486]ENERGY: 18680000 | 3335.0023   | 5568.2486  | 5670.7919   |           |
| 332.6464                | -14330.2903 | -1831.3449 | 0.0000      | 0.0000    |
| 8231.8336               | 6976.8875   | 313.8931   | -1254.9461  | 7044.3371 |
| 313.0523                | 38.8145     | 12.8674    | 680285.8938 | -15.0723  |
| -15.0912                |             |            |             |           |
| [33536]ENERGY: 18690000 | 3390.9855   | 5440.6022  | 5662.3070   |           |
| 336.3624                | -14303.9869 | -1814.8588 | 0.0000      | 0.0000    |
| 8266.4883               | 6977.8998   | 315.2145   | -1288.5885  | 7045.2934 |
| 312.9894                | -49.4864    | -47.8383   | 680285.8938 | -19.5701  |
| -19.5607                |             |            |             |           |
| [33575]ENERGY: 18700000 | 3358.5455   | 5472.4175  | 5706.5402   |           |
| 342.3654                | -14230.7049 | -1905.5485 | 0.0000      | 0.0000    |
| 8236.6911               | 6980.3062   | 314.0783   | -1256.3849  | 7047.0066 |
| 313.2419                | -143.1470   | -171.3252  | 680285.8938 | -15.5176  |
| -15.5214                |             |            |             |           |
| [33625]ENERGY: 18710000 | 3392.0471   | 5582.6458  | 5662.8102   |           |
| 319.1530                | -14326.1854 | -1794.7676 | 0.0000      | 0.0000    |
| 8147.4893               | 6983.1924   | 310.6769   | -1164.2969  | 7046.1966 |
| 313.2977                | 77.1823     | 88.0463    | 680285.8938 | -16.1390  |
| -16.1311                |             |            |             |           |
| [33661]ENERGY: 18720000 | 3382.6874   | 5516.7867  | 5719.2651   |           |
| 328.9737                | -14310.8986 | -1834.7965 | 0.0000      | 0.0000    |
| 8180.6307               | 6982.6485   | 311.9406   | -1197.9821  | 7046.6973 |
| 313.2683                | -166.3333   | -73.1157   | 680285.8938 | -17.5883  |
| -17.5843                |             |            |             |           |
| [33711]ENERGY: 18730000 | 3370.2798   | 5529.7240  | 5640.8891   |           |
| 351.5811                | -14302.8854 | -1806.3387 | 0.0000      | 0.0000    |
| 8198.9579               | 6982.2078   | 312.6395   | -1216.7501  | 7047.1877 |
| 313.1915                | 67.2465     | 62.8006    | 680285.8938 | -18.8209  |
| -18.8305                |             |            |             |           |
| [33747]ENERGY: 18740000 | 3334.8241   | 5508.0401  | 5718.4566   |           |

## Supplementary Text 6

|                         |             |            |             |           |
|-------------------------|-------------|------------|-------------|-----------|
| 347.4016                | -14448.1328 | -1701.1203 | 0.0000      | 0.0000    |
| 8216.0814               | 6975.5507   | 313.2924   | -1240.5307  | 7045.6756 |
| 313.1294                | 161.8702    | 120.2224   | 680285.8938 | -19.2039  |
| -19.1952                |             |            |             |           |
| [33797]ENERGY: 18750000 | 3381.0956   | 5427.5215  | 5647.5840   |           |
| 340.4026                | -14259.5411 | -1876.7987 | 0.0000      | 0.0000    |
| 8317.8636               | 6978.1274   | 317.1736   | -1339.7362  | 7047.2993 |
| 313.0510                | -110.8900   | -82.7546   | 680285.8938 | -21.2041  |
| -21.2193                |             |            |             |           |
| [33833]ENERGY: 18760000 | 3408.8576   | 5479.7139  | 5662.6222   |           |
| 331.0209                | -14266.2533 | -1817.9162 | 0.0000      | 0.0000    |
| 8184.3249               | 6982.3698   | 312.0815   | -1201.9551  | 7047.3043 |
| 313.0743                | 98.1271     | 25.3569    | 680285.8938 | -19.7215  |
| -19.7091                |             |            |             |           |
| [33883]ENERGY: 18770000 | 3375.6963   | 5526.1947  | 5672.8799   |           |
| 335.8859                | -14293.6876 | -1833.9568 | 0.0000      | 0.0000    |
| 8199.7136               | 6982.7259   | 312.6683   | -1216.9877  | 7048.2003 |
| 313.1070                | -77.1710    | -105.4652  | 680285.8938 | -14.6624  |
| -14.6594                |             |            |             |           |
| [33919]ENERGY: 18780000 | 3285.6767   | 5579.7010  | 5654.0920   |           |
| 331.8519                | -14335.7123 | -1762.9046 | 0.0000      | 0.0000    |
| 8225.5595               | 6978.2641   | 313.6538   | -1247.2954  | 7045.4110 |
| 312.8986                | -134.1231   | -146.5489  | 680285.8938 | -15.8189  |
| -15.8137                |             |            |             |           |
| [33969]ENERGY: 18790000 | 3377.9651   | 5470.6665  | 5664.9556   |           |
| 354.7088                | -14370.1193 | -1839.3268 | 0.0000      | 0.0000    |
| 8320.1334               | 6978.9834   | 317.2601   | -1341.1500  | 7046.0084 |
| 313.0266                | -153.1042   | -143.1099  | 680285.8938 | -18.0822  |
| -18.0973                |             |            |             |           |
| [34008]ENERGY: 18800000 | 3321.3997   | 5576.0784  | 5716.8577   |           |
| 316.6795                | -14353.7413 | -1777.1589 | 0.0000      | 0.0000    |
| 8183.3779               | 6983.4930   | 312.0454   | -1199.8849  | 7046.7196 |
| 313.1935                | 151.5689    | 96.7748    | 680285.8938 | -14.2432  |
| -14.2619                |             |            |             |           |
| [34058]ENERGY: 18810000 | 3348.4249   | 5566.6126  | 5687.7010   |           |
| 362.0103                | -14334.7753 | -1816.6826 | 0.0000      | 0.0000    |
| 8166.7008               | 6979.9917   | 311.4095   | -1186.7090  | 7046.9343 |
| 313.2029                | -104.5251   | -131.1879  | 680285.8938 | -13.9476  |
| -13.9198                |             |            |             |           |
| [34094]ENERGY: 18820000 | 3437.3100   | 5522.7560  | 5686.4789   |           |
| 345.1560                | -14342.2248 | -1869.0411 | 0.0000      | 0.0000    |
| 8199.7780               | 6980.2131   | 312.6708   | -1219.5649  | 7045.4726 |
| 313.3082                | -87.6761    | -82.1891   | 680285.8938 | -15.8231  |
| -15.8177                |             |            |             |           |
| [34144]ENERGY: 18830000 | 3359.4744   | 5570.1413  | 5665.9418   |           |
| 344.2813                | -14391.0597 | -1765.3006 | 0.0000      | 0.0000    |
| 8197.9537               | 6981.4323   | 312.6012   | -1216.5214  | 7046.3736 |
| 313.3132                | 50.5974     | 111.0559   | 680285.8938 | -12.7586  |
| -12.7698                |             |            |             |           |
| [34180]ENERGY: 18840000 | 3377.4556   | 5460.7385  | 5677.5252   |           |
| 334.4179                | -14277.3568 | -1801.1264 | 0.0000      | 0.0000    |
| 8210.1944               | 6981.8484   | 313.0680   | -1228.3460  | 7046.3477 |
| 313.1932                | -21.6145    | -76.1100   | 680285.8938 | -16.6438  |
| -16.6526                |             |            |             |           |

## Supplementary Text 6

|                         |             |            |             |
|-------------------------|-------------|------------|-------------|
| [34230]ENERGY: 18850000 | 3329.1429   | 5472.0195  | 5611.8214   |
| 334.3685                | -14283.4090 | -1697.8750 | 0.0000      |
| 8219.8474               | 6985.9157   | 313.4360   | -1233.9317  |
| 313.0692                | 108.9208    | 86.4478    | 680285.8938 |
| -16.7572                |             |            | -16.7834    |
| [34266]ENERGY: 18860000 | 3352.4239   | 5519.8524  | 5672.9476   |
| 348.3126                | -14248.9532 | -1829.8987 | 0.0000      |
| 8168.4110               | 6983.0957   | 311.4747   | -1185.3153  |
| 312.9176                | 52.1401     | 59.2215    | 680285.8938 |
| -16.0670                |             |            | -16.0550    |
| [34316]ENERGY: 18870000 | 3373.4362   | 5503.9757  | 5724.9882   |
| 347.7483                | -14334.3217 | -1830.0436 | 0.0000      |
| 8195.8604               | 6981.6435   | 312.5214   | -1214.2169  |
| 313.0803                | -36.9207    | -66.2848   | 680285.8938 |
| -15.6928                |             |            | -15.6904    |
| [34352]ENERGY: 18880000 | 3337.0880   | 5555.5894  | 5680.2287   |
| 355.5227                | -14319.3082 | -1796.7535 | 0.0000      |
| 8168.9438               | 6981.3108   | 311.4950   | -1187.6330  |
| 313.0565                | -107.8912   | -100.9658  | 680285.8938 |
| -17.7374                |             |            | -17.7371    |
| [34402]ENERGY: 18890000 | 3316.0138   | 5592.6662  | 5715.9451   |
| 329.3763                | -14299.7608 | -1798.9185 | 0.0000      |
| 8123.8888               | 6979.2109   | 309.7770   | -1144.6780  |
| 312.9446                | -28.5393    | -42.3677   | 680285.8938 |
| -13.1493                |             |            | -13.1237    |
| [34441]ENERGY: 18900000 | 3318.9100   | 5511.6440  | 5647.0372   |
| 347.9028                | -14315.0147 | -1782.9685 | 0.0000      |
| 8254.6890               | 6982.1997   | 314.7646   | -1272.4893  |
| 313.0084                | 35.5637     | -29.5108   | 680285.8938 |
| -12.4994                |             |            | -12.5291    |
| [34491]ENERGY: 18910000 | 3403.2065   | 5585.7002  | 5630.3914   |
| 363.2241                | -14272.6034 | -1844.2091 | 0.0000      |
| 8116.5411               | 6982.2508   | 309.4968   | -1134.2903  |
| 313.2278                | -106.7882   | -125.2810  | 680285.8938 |
| -11.0062                |             |            | -11.0093    |
| [34527]ENERGY: 18920000 | 3398.9073   | 5468.7219  | 5648.2550   |
| 341.0386                | -14409.5282 | -1685.3630 | 0.0000      |
| 8219.9204               | 6981.9520   | 313.4388   | -1237.9684  |
| 313.3387                | 135.2686    | 118.2797   | 680285.8938 |
| -12.1927                |             |            | -12.1766    |
| [34577]ENERGY: 18930000 | 3413.0916   | 5487.3815  | 5673.6944   |
| 362.6304                | -14377.1305 | -1782.5624 | 0.0000      |
| 8202.5369               | 6979.6419   | 312.7760   | -1222.8950  |
| 313.5046                | -33.3656    | -32.1704   | 680285.8938 |
| -12.8504                |             |            | -12.8515    |
| [34613]ENERGY: 18940000 | 3335.7246   | 5610.0592  | 5710.7463   |
| 360.2210                | -14355.7203 | -1846.3025 | 0.0000      |
| 8167.9524               | 6982.6806   | 311.4572   | -1185.2718  |
| 313.4479                | -98.9071    | -108.1198  | 680285.8938 |
| -17.1212                |             |            | -17.1340    |
| [34663]ENERGY: 18950000 | 3364.0079   | 5558.2964  | 5655.0611   |
| 351.3000                | -14350.0967 | -1725.4313 | 0.0000      |
| 8131.8078               | 6984.9452   | 310.0789   | -1146.8626  |
| 313.2734                | 16.5944     | 62.0927    | 680285.8938 |
|                         |             |            | -14.4827    |

Supplementary Text 6

-14.4842  
 [34699]ENERGY: 18960000      3440.3079      5560.7847      5645.1234  
 363.1237      -14348.2263      -1799.8001      0.0000      0.0000  
 8122.9140      6984.2274      309.7398      -1138.6866      7049.4812  
 313.2543      -87.3779      -103.2090      680285.8938      -17.4661  
 -17.4743  
 [34749]ENERGY: 18970000      3337.4149      5359.2909      5736.6273  
 342.1657      -14312.9715      -1781.9127      0.0000      0.0000  
 8300.1788      6980.7934      316.4992      -1319.3854      7049.0406  
 313.3128      7.3115      43.7221      680285.8938      -13.2140  
 -13.2046  
 [34785]ENERGY: 18980000      3346.7184      5450.2444      5705.4025  
 335.0486      -14323.3546      -1804.6778      0.0000      0.0000  
 8274.9432      6984.3248      315.5369      -1290.6185      7049.7427  
 313.2662      64.0060      1.0011      680285.8938      -18.0724  
 -18.0690  
 [34835]ENERGY: 18990000      3341.1965      5440.1958      5662.5401  
 332.2269      -14181.9482      -1803.0292      0.0000      0.0000  
 8193.0856      6984.2674      312.4156      -1208.8182      7048.3296  
 313.2530      -33.2841      -60.4437      680285.8938      -14.5229  
 -14.5402  
 [34874]ENERGY: 19000000      3337.1342      5424.3487      5594.8231  
 321.9932      -14293.3808      -1703.1792      0.0000      0.0000  
 8300.0840      6981.8232      316.4956      -1318.2608      7048.9561  
 313.0611      108.4683      68.0295      680285.8938      -17.6325  
 -17.6153  
 [34924]ENERGY: 19010000      3380.1483      5550.5499      5664.6570  
 343.1577      -14337.2946      -1765.5327      0.0000      0.0000  
 8152.1456      6987.8311      310.8545      -1164.3145      7049.2645  
 313.1361      -164.3354      -114.7087      680285.8938      -17.1882  
 -17.2135  
 [34960]ENERGY: 19020000      3365.5275      5517.2767      5678.5209  
 334.4841      -14358.2809      -1778.2082      0.0000      0.0000  
 8222.5853      6981.9054      313.5404      -1240.6799      7050.6774  
 313.3325      -74.8295      -45.4972      680285.8938      -12.8606  
 -12.8443  
 [35010]ENERGY: 19030000      3371.1145      5471.6406      5646.3054  
 330.1763      -14296.4495      -1772.5043      0.0000      0.0000  
 8234.9249      6985.2080      314.0110      -1249.7169      7049.6850  
 313.2345      -38.5220      32.7266      680285.8938      -15.6172  
 -15.6029  
 [35046]ENERGY: 19040000      3406.7861      5513.1150      5689.1710  
 361.3058      -14299.4507      -1854.3885      0.0000      0.0000  
 8166.5369      6983.0756      311.4032      -1183.4613      7050.8958  
 313.2038      -112.5662      -190.7330      680285.8938      -13.6759  
 -13.6865  
 [35096]ENERGY: 19050000      3293.5155      5372.3681      5677.8963  
 341.1703      -14329.1024      -1703.6329      0.0000      0.0000  
 8328.0269      6980.2419      317.5611      -1347.7850      7049.1144  
 313.0876      111.5629      108.7694      680285.8938      -14.9898  
 -14.9987  
 [35132]ENERGY: 19060000      3355.2558      5644.3616      5634.7479  
 336.5683      -14345.8951      -1857.6435      0.0000      0.0000  
 8215.4280      6982.8230      313.2675      -1232.6050      7049.8853



## Supplementary Text 6

|                         |             |            |             |           |
|-------------------------|-------------|------------|-------------|-----------|
| 313.3443                | 20.7989     | -51.2202   | 680285.8938 | -21.7794  |
| -21.7777                |             |            |             |           |
| [35182]ENERGY: 19070000 | 3436.8255   | 5494.9236  | 5608.8307   |           |
| 345.2848                | -14385.7314 | -1750.8593 | 0.0000      | 0.0000    |
| 8235.7097               | 6984.9836   | 314.0409   | -1250.7260  | 7050.0109 |
| 313.3093                | 28.9361     | 20.3715    | 680285.8938 | -17.0880  |
| -17.0833                |             |            |             |           |
| [35218]ENERGY: 19080000 | 3425.9314   | 5526.6182  | 5686.8511   |           |
| 341.3281                | -14327.6538 | -1812.4414 | 0.0000      | 0.0000    |
| 8141.6397               | 6982.2733   | 310.4539   | -1159.3664  | 7050.7950 |
| 313.1888                | -75.1722    | -84.6499   | 680285.8938 | -14.1728  |
| -14.1801                |             |            |             |           |
| [35268]ENERGY: 19090000 | 3340.7116   | 5576.6723  | 5690.6703   |           |
| 338.9929                | -14325.4684 | -1797.7853 | 0.0000      | 0.0000    |
| 8161.4998               | 6985.2932   | 311.2111   | -1176.2066  | 7050.9238 |
| 313.2723                | 175.0680    | 151.4152   | 680285.8938 | -12.8605  |
| -12.8687                |             |            |             |           |
| [35307]ENERGY: 19100000 | 3366.0600   | 5452.2085  | 5661.9392   |           |
| 350.7199                | -14243.2663 | -1773.2625 | 0.0000      | 0.0000    |
| 8166.7990               | 6981.1977   | 311.4132   | -1185.6013  | 7049.4325 |
| 313.1818                | 46.8232     | 26.3618    | 680285.8938 | -14.9623  |
| -14.9503                |             |            |             |           |
| [35357]ENERGY: 19110000 | 3321.8308   | 5517.3568  | 5655.2352   |           |
| 356.8684                | -14292.0691 | -1850.6736 | 0.0000      | 0.0000    |
| 8277.1387               | 6985.6871   | 315.6206   | -1291.4516  | 7050.9655 |
| 313.3101                | 43.1789     | 31.7649    | 680285.8938 | -16.0834  |
| -16.0874                |             |            |             |           |
| [35393]ENERGY: 19120000 | 3404.9355   | 5463.1430  | 5664.0978   |           |
| 326.3249                | -14271.4184 | -1800.0581 | 0.0000      | 0.0000    |
| 8197.4366               | 6984.4613   | 312.5815   | -1212.9753  | 7051.4390 |
| 313.2102                | -33.2948    | -38.1238   | 680285.8938 | -16.5390  |
| -16.5252                |             |            |             |           |
| [35443]ENERGY: 19130000 | 3269.2910   | 5604.4438  | 5687.3275   |           |
| 332.8585                | -14342.4916 | -1793.2925 | 0.0000      | 0.0000    |
| 8226.5856               | 6984.7223   | 313.6930   | -1241.8633  | 7051.2176 |
| 313.4286                | 79.6008     | 132.6126   | 680285.8938 | -18.9443  |
| -18.9460                |             |            |             |           |
| [35479]ENERGY: 19140000 | 3360.5967   | 5520.6132  | 5655.7468   |           |
| 332.3655                | -14300.3866 | -1778.3872 | 0.0000      | 0.0000    |
| 8192.9672               | 6983.5156   | 312.4111   | -1209.4516  | 7051.9336 |
| 313.2655                | -23.6217    | -26.9372   | 680285.8938 | -16.7869  |
| -16.7949                |             |            |             |           |
| [35529]ENERGY: 19150000 | 3369.9656   | 5505.1021  | 5663.7416   |           |
| 356.6557                | -14239.9812 | -1880.0602 | 0.0000      | 0.0000    |
| 8213.6047               | 6989.0283   | 313.1980   | -1224.5764  | 7052.5541 |
| 313.3026                | -18.3550    | -42.6639   | 680285.8938 | -18.7246  |
| -18.7179                |             |            |             |           |
| [35565]ENERGY: 19160000 | 3304.7673   | 5544.6530  | 5713.2453   |           |
| 336.9164                | -14354.4762 | -1744.1424 | 0.0000      | 0.0000    |
| 8186.5662               | 6987.5296   | 312.1670   | -1199.0366  | 7050.8827 |
| 313.2462                | -12.1824    | 43.4011    | 680285.8938 | -20.8657  |
| -20.8621                |             |            |             |           |
| [35615]ENERGY: 19170000 | 3404.4062   | 5327.5737  | 5693.8443   |           |
| 347.2035                | -14280.7067 | -1806.1724 | 0.0000      | 0.0000    |

## Supplementary Text 6

|                         |             |            |             |           |
|-------------------------|-------------|------------|-------------|-----------|
| 8298.5886               | 6984.7373   | 316.4386   | -1313.8513  | 7051.7722 |
| 313.2513                | -11.6605    | -50.8062   | 680285.8938 | -18.9781  |
| -18.9751                |             |            |             |           |
| [35651]ENERGY: 19180000 | 3368.8493   | 5513.7758  | 5723.8813   |           |
| 334.0283                | -14350.8029 | -1748.5384 | 0.0000      | 0.0000    |
| 8146.8432               | 6988.0366   | 310.6523   | -1158.8066  | 7051.2981 |
| 313.1806                | -53.2533    | -68.0318   | 680285.8938 | -20.1662  |
| -20.1711                |             |            |             |           |
| [35701]ENERGY: 19190000 | 3287.6158   | 5490.7663  | 5702.4047   |           |
| 327.7866                | -14272.4562 | -1759.9678 | 0.0000      | 0.0000    |
| 8210.4776               | 6986.6272   | 313.0788   | -1223.8504  | 7052.9177 |
| 313.0120                | 110.2744    | 63.4999    | 680285.8938 | -16.3426  |
| -16.3459                |             |            |             |           |
| [35740]ENERGY: 19200000 | 3344.4245   | 5585.6534  | 5683.6525   |           |
| 350.6910                | -14263.3182 | -1850.9005 | 0.0000      | 0.0000    |
| 8138.1838               | 6988.3865   | 310.3221   | -1149.7973  | 7053.1592 |
| 313.1673                | -26.2699    | -61.0111   | 680285.8938 | -18.3431  |
| -18.3449                |             |            |             |           |
| [35790]ENERGY: 19210000 | 3426.6957   | 5462.1079  | 5718.5596   |           |
| 347.2871                | -14272.3680 | -1804.4435 | 0.0000      | 0.0000    |
| 8111.4808               | 6989.3196   | 309.3038   | -1122.1611  | 7053.0556 |
| 313.0401                | -250.4888   | -223.0975  | 680285.8938 | -15.0720  |
| -15.0861                |             |            |             |           |
| [35826]ENERGY: 19220000 | 3235.5916   | 5617.1188  | 5705.4105   |           |
| 332.7471                | -14329.7948 | -1780.3707 | 0.0000      | 0.0000    |
| 8205.3945               | 6986.0970   | 312.8849   | -1219.2975  | 7054.0005 |
| 313.1354                | 141.3559    | 90.6769    | 680285.8938 | -21.4996  |
| -21.4813                |             |            |             |           |
| [35876]ENERGY: 19230000 | 3332.3820   | 5622.2810  | 5650.6577   |           |
| 349.5402                | -14415.5164 | -1776.7848 | 0.0000      | 0.0000    |
| 8224.3488               | 6986.9086   | 313.6077   | -1237.4403  | 7053.1965 |
| 313.1025                | -134.4259   | -91.4059   | 680285.8938 | -16.9911  |
| -16.9914                |             |            |             |           |
| [35912]ENERGY: 19240000 | 3428.3701   | 5466.3683  | 5707.5863   |           |
| 351.4680                | -14266.9881 | -1814.0849 | 0.0000      | 0.0000    |
| 8115.1693               | 6987.8890   | 309.4445   | -1127.2803  | 7052.4633 |
| 313.1825                | 7.6549      | 4.4195     | 680285.8938 | -18.2396  |
| -18.2627                |             |            |             |           |
| [35962]ENERGY: 19250000 | 3337.6721   | 5509.2921  | 5694.8481   |           |
| 339.5997                | -14262.3965 | -1859.9679 | 0.0000      | 0.0000    |
| 8226.6402               | 6985.6876   | 313.6951   | -1240.9526  | 7052.3714 |
| 313.0964                | -38.3386    | -87.4489   | 680285.8938 | -21.1497  |
| -21.1275                |             |            |             |           |
| [35998]ENERGY: 19260000 | 3351.9196   | 5441.0232  | 5611.1975   |           |
| 342.1257                | -14203.1191 | -1784.7445 | 0.0000      | 0.0000    |
| 8228.1912               | 6986.5935   | 313.7542   | -1241.5977  | 7050.9087 |
| 313.1909                | 43.4195     | 29.2978    | 680285.8938 | -15.2691  |
| -15.2651                |             |            |             |           |
| [36048]ENERGY: 19270000 | 3319.2888   | 5403.0649  | 5675.9984   |           |
| 370.3041                | -14300.9762 | -1812.5839 | 0.0000      | 0.0000    |
| 8326.1849               | 6981.2809   | 317.4909   | -1344.9039  | 7052.9592 |
| 313.2113                | -38.6063    | -59.9998   | 680285.8938 | -16.0862  |
| -16.0933                |             |            |             |           |
| [36084]ENERGY: 19280000 | 3322.3151   | 5607.0103  | 5714.8339   |           |

## Supplementary Text 6

|                         |             |            |             |           |
|-------------------------|-------------|------------|-------------|-----------|
| 323.6026                | -14323.5542 | -1817.6729 | 0.0000      | 0.0000    |
| 8160.1122               | 6986.6469   | 311.1582   | -1173.4652  | 7053.7691 |
| 313.3425                | -85.0155    | -130.3698  | 680285.8938 | -13.3316  |
| -13.3264                |             |            |             |           |
| [36134]ENERGY: 19290000 | 3366.1207   | 5523.5370  | 5683.8786   |           |
| 341.3080                | -14348.1690 | -1789.9760 | 0.0000      | 0.0000    |
| 8211.9900               | 6988.6893   | 313.1364   | -1223.3006  | 7053.7278 |
| 313.3908                | -93.0626    | -81.7853   | 680285.8938 | -16.3394  |
| -16.3404                |             |            |             |           |
| [36173]ENERGY: 19300000 | 3316.9399   | 5457.8449  | 5681.6864   |           |
| 345.5313                | -14197.5788 | -1836.8988 | 0.0000      | 0.0000    |
| 8218.4580               | 6985.9828   | 313.3831   | -1232.4752  | 7054.3425 |
| 313.4807                | 74.9108     | 90.4562    | 680285.8938 | -17.9390  |
| -17.9457                |             |            |             |           |
| [36223]ENERGY: 19310000 | 3329.3617   | 5519.6325  | 5685.8895   |           |
| 344.2417                | -14238.9694 | -1830.0530 | 0.0000      | 0.0000    |
| 8180.2514               | 6990.3544   | 311.9262   | -1189.8970  | 7055.8596 |
| 313.2706                | -36.8770    | -30.1523   | 680285.8938 | -13.5821  |
| -13.5657                |             |            |             |           |
| [36259]ENERGY: 19320000 | 3266.7886   | 5482.2580  | 5632.7073   |           |
| 353.6361                | -14226.8315 | -1807.5540 | 0.0000      | 0.0000    |
| 8286.4879               | 6987.4924   | 315.9771   | -1298.9955  | 7056.3434 |
| 313.2916                | 68.5011     | -10.5043   | 680285.8938 | -14.8729  |
| -14.8943                |             |            |             |           |
| [36309]ENERGY: 19330000 | 3384.2684   | 5521.7122  | 5670.8176   |           |
| 360.7440                | -14337.9443 | -1749.2263 | 0.0000      | 0.0000    |
| 8139.9821               | 6990.3536   | 310.3906   | -1149.6284  | 7054.5335 |
| 313.1738                | 0.9775      | -28.9925   | 680285.8938 | -13.5950  |
| -13.5979                |             |            |             |           |
| [36345]ENERGY: 19340000 | 3306.8714   | 5519.0059  | 5696.3659   |           |
| 367.8896                | -14262.3155 | -1828.8444 | 0.0000      | 0.0000    |
| 8195.2194               | 6994.1923   | 312.4969   | -1201.0271  | 7055.6342 |
| 313.1932                | 26.1061     | 8.3372     | 680285.8938 | -17.5116  |
| -17.4920                |             |            |             |           |
| [36395]ENERGY: 19350000 | 3316.4395   | 5560.8830  | 5714.9783   |           |
| 348.6931                | -14373.1310 | -1770.3644 | 0.0000      | 0.0000    |
| 8190.8880               | 6988.3864   | 312.3318   | -1202.5016  | 7055.3601 |
| 313.4281                | 16.2069     | 12.4519    | 680285.8938 | -16.0225  |
| -16.0223                |             |            |             |           |
| [36431]ENERGY: 19360000 | 3336.6031   | 5625.0083  | 5656.7806   |           |
| 359.5427                | -14331.5463 | -1805.5176 | 0.0000      | 0.0000    |
| 8149.8508               | 6990.7215   | 310.7670   | -1159.1293  | 7055.0024 |
| 313.4250                | 142.1371    | 91.6799    | 680285.8938 | -17.4634  |
| -17.4784                |             |            |             |           |
| [36481]ENERGY: 19370000 | 3276.5248   | 5556.1393  | 5671.2041   |           |
| 343.5603                | -14219.1103 | -1830.3709 | 0.0000      | 0.0000    |
| 8191.1898               | 6989.1371   | 312.3433   | -1202.0527  | 7056.3390 |
| 313.3376                | 246.2151    | 112.6473   | 680285.8938 | -14.5620  |
| -14.5750                |             |            |             |           |
| [36517]ENERGY: 19380000 | 3320.5284   | 5454.1035  | 5741.3427   |           |
| 347.1710                | -14333.3102 | -1774.5074 | 0.0000      | 0.0000    |
| 8233.5306               | 6988.8586   | 313.9578   | -1244.6721  | 7055.7575 |
| 313.3569                | 97.0945     | 29.9634    | 680285.8938 | -14.3396  |
| -14.3327                |             |            |             |           |

## Supplementary Text 6

|                         |             |            |             |
|-------------------------|-------------|------------|-------------|
| [36567]ENERGY: 19390000 | 3310.6889   | 5541.4412  | 5660.6147   |
| 331.6831                | -14297.4474 | -1781.5442 | 0.0000      |
| 8224.7138               | 6990.1501   | 313.6216   | -1234.5637  |
| 313.3383                | 26.5277     | -13.4743   | 680285.8938 |
| -19.3103                |             |            | -19.3265    |
| [36606]ENERGY: 19400000 | 3360.3290   | 5524.7194  | 5675.4916   |
| 333.3911                | -14315.0645 | -1832.2226 | 0.0000      |
| 8243.0657               | 6989.7097   | 314.3214   | -1253.3560  |
| 313.3625                | -142.3229   | -130.0213  | 680285.8938 |
| -19.5277                |             |            | -19.5229    |
| [36656]ENERGY: 19410000 | 3357.0412   | 5494.4931  | 5707.5736   |
| 335.3995                | -14313.1916 | -1779.5044 | 0.0000      |
| 8190.0130               | 6991.8244   | 312.2984   | -1198.1886  |
| 313.2746                | 55.7250     | 89.3917    | 680285.8938 |
| -18.8261                |             |            | -18.8117    |
| [36692]ENERGY: 19420000 | 3374.3372   | 5590.0049  | 5714.2294   |
| 339.8788                | -14370.2111 | -1749.7496 | 0.0000      |
| 8094.5996               | 6993.0892   | 308.6601   | -1101.5103  |
| 313.2289                | 45.4132     | 75.6594    | 680285.8938 |
| -14.6765                |             |            | -14.6953    |
| [36742]ENERGY: 19430000 | 3291.7122   | 5571.3971  | 5654.8942   |
| 342.9991                | -14288.4639 | -1772.4908 | 0.0000      |
| 8190.1895               | 6990.2375   | 312.3051   | -1199.9521  |
| 313.2117                | -25.4809    | -18.0574   | 680285.8938 |
| -13.9831                |             |            | -13.9621    |
| [36778]ENERGY: 19440000 | 3358.8691   | 5488.1833  | 5655.0742   |
| 332.8606                | -14299.1830 | -1750.9991 | 0.0000      |
| 8210.3407               | 6995.1458   | 313.0735   | -1215.1949  |
| 313.3722                | 151.2346    | 91.2570    | 680285.8938 |
| -15.6571                |             |            | -15.6624    |
| [36828]ENERGY: 19450000 | 3372.1229   | 5552.2536  | 5679.3727   |
| 330.9096                | -14312.8592 | -1842.0031 | 0.0000      |
| 8212.2583               | 6992.0548   | 313.1467   | -1220.2034  |
| 313.4529                | -125.5085   | -131.0329  | 680285.8938 |
| -13.6039                |             |            | -13.6192    |
| [36864]ENERGY: 19460000 | 3470.1207   | 5433.2463  | 5658.8725   |
| 351.1935                | -14308.8073 | -1844.7806 | 0.0000      |
| 8231.0355               | 6990.8806   | 313.8627   | -1240.1549  |
| 313.3556                | -74.2023    | -144.3905  | 680285.8938 |
| -17.7354                |             |            | -17.7320    |
| [36914]ENERGY: 19470000 | 3441.6090   | 5561.1928  | 5705.7249   |
| 339.6676                | -14316.1438 | -1820.7347 | 0.0000      |
| 8084.0832               | 6995.3989   | 308.2591   | -1088.6843  |
| 313.3184                | -152.3734   | -169.4063  | 680285.8938 |
| -19.0807                |             |            | -19.0972    |
| [36950]ENERGY: 19480000 | 3418.0936   | 5542.7115  | 5618.4306   |
| 343.6094                | -14324.4860 | -1804.6942 | 0.0000      |
| 8199.2190               | 6992.8839   | 312.6494   | -1206.3351  |
| 313.3673                | -104.5801   | -56.4526   | 680285.8938 |
| -19.1705                |             |            | -19.1558    |
| [37000]ENERGY: 19490000 | 3430.2189   | 5559.7377  | 5707.2104   |
| 326.3061                | -14361.5013 | -1864.7742 | 0.0000      |
| 8195.7225               | 6992.9200   | 312.5161   | -1202.8025  |
| 313.4361                | -124.9972   | -58.3213   | 680285.8938 |
|                         |             |            | -18.7755    |

Supplementary Text 6

-18.7773  
 [37039]ENERGY: 19500000 3384.6350 5436.3999 5661.5360  
 324.6276 -14298.6403 -1768.9990 0.0000 0.0000  
 8248.3360 6987.8952 314.5224 -1260.4408 7056.9317  
 313.3526 43.0789 2.9913 680285.8938 -18.5461  
 -18.5380  
 [37089]ENERGY: 19510000 3286.8302 5534.2502 5676.6070  
 345.7393 -14324.9978 -1759.6021 0.0000 0.0000  
 8237.1069 6995.9337 314.0942 -1241.1732 7057.4853  
 313.3258 77.7585 83.2157 680285.8938 -16.3273  
 -16.3387  
 [37125]ENERGY: 19520000 3379.1540 5424.0182 5656.3658  
 314.4864 -14161.0254 -1815.4662 0.0000 0.0000  
 8197.3942 6994.9269 312.5799 -1202.4672 7058.2989  
 313.1728 -59.1967 -47.5822 680285.8938 -18.0301  
 -18.0206  
 [37175]ENERGY: 19530000 3372.7544 5524.8789 5658.4861  
 334.7710 -14277.9446 -1847.0110 0.0000 0.0000  
 8221.7292 6987.6640 313.5078 -1234.0653 7057.7241  
 313.2150 -168.4851 -91.9347 680285.8938 -12.3668  
 -12.3725  
 [37211]ENERGY: 19540000 3383.2991 5547.3224 5651.6671  
 356.0891 -14328.8045 -1814.3634 0.0000 0.0000  
 8197.7303 6992.9401 312.5927 -1204.7902 7057.2979  
 313.3845 65.6135 50.6423 680285.8938 -14.3273  
 -14.3496  
 [37261]ENERGY: 19550000 3392.9954 5498.2037 5660.7637  
 350.6150 -14269.9026 -1842.0151 0.0000 0.0000  
 8201.3247 6991.9848 312.7297 -1209.3400 7058.2248  
 313.1945 -143.2055 -137.2137 680285.8938 -19.7062  
 -19.6818  
 [37297]ENERGY: 19560000 3291.4511 5527.7571 5648.9518  
 345.9729 -14270.3670 -1806.8872 0.0000 0.0000  
 8253.9528 6990.8315 314.7365 -1263.1213 7056.5645  
 313.3259 66.3640 72.9516 680285.8938 -17.4857  
 -17.4856  
 [37347]ENERGY: 19570000 3395.7345 5512.9882 5647.6576  
 325.8123 -14227.1291 -1859.9177 0.0000 0.0000  
 8193.7467 6988.8923 312.4408 -1204.8543 7058.1645  
 313.2935 7.4302 -77.0002 680285.8938 -16.5700  
 -16.5678  
 [37383]ENERGY: 19580000 3283.7156 5457.6407 5636.1704  
 334.3046 -14283.0646 -1767.0412 0.0000 0.0000  
 8329.3088 6991.0344 317.6100 -1338.2745 7056.6996  
 313.2673 95.3754 86.8004 680285.8938 -19.7729  
 -19.7783  
 [37433]ENERGY: 19590000 3318.7992 5462.8816 5678.2063  
 328.7992 -14302.5628 -1781.8918 0.0000 0.0000  
 8280.5627 6984.7945 315.7512 -1295.7683 7057.4865  
 313.2691 63.0098 -16.1387 680285.8938 -17.0861  
 -17.0867  
 [37472]ENERGY: 19600000 3357.6064 5499.3641 5686.6537  
 342.7775 -14267.2190 -1841.0632 0.0000 0.0000  
 8211.5896 6989.7091 313.1212 -1221.8805 7058.0908

## Supplementary Text 6

|                         |             |            |             |           |
|-------------------------|-------------|------------|-------------|-----------|
| 313.2719                | 153.2302    | -3.2299    | 680285.8938 | -17.7738  |
| -17.7667                |             |            |             |           |
| [37522]ENERGY: 19610000 | 3368.9546   | 5477.1713  | 5639.3048   |           |
| 339.5538                | -14292.5241 | -1769.1611 | 0.0000      | 0.0000    |
| 8231.7768               | 6995.0761   | 313.8909   | -1236.7008  | 7059.0195 |
| 313.3496                | 196.6178    | 116.6656   | 680285.8938 | -17.5411  |
| -17.5384                |             |            |             |           |
| [37558]ENERGY: 19620000 | 3392.6479   | 5436.8796  | 5725.7035   |           |
| 360.6531                | -14223.5103 | -1879.5991 | 0.0000      | 0.0000    |
| 8181.8140               | 6994.5888   | 311.9858   | -1187.2252  | 7059.5814 |
| 313.3174                | -6.9962     | -75.5339   | 680285.8938 | -16.8989  |
| -16.9240                |             |            |             |           |
| [37608]ENERGY: 19630000 | 3410.9026   | 5529.9132  | 5677.6125   |           |
| 349.6377                | -14331.3521 | -1815.3218 | 0.0000      | 0.0000    |
| 8172.1047               | 6993.4968   | 311.6155   | -1178.6078  | 7057.7238 |
| 313.2992                | -65.6241    | -31.5385   | 680285.8938 | -13.3547  |
| -13.3289                |             |            |             |           |
| [37644]ENERGY: 19640000 | 3295.5689   | 5520.1084  | 5702.3820   |           |
| 352.5303                | -14327.2821 | -1686.6956 | 0.0000      | 0.0000    |
| 8136.6742               | 6993.2862   | 310.2645   | -1143.3880  | 7057.5075 |
| 313.3422                | 12.7438     | 8.1269     | 680285.8938 | -17.7051  |
| -17.7140                |             |            |             |           |
| [37694]ENERGY: 19650000 | 3382.4120   | 5545.2278  | 5644.2687   |           |
| 333.5055                | -14335.1333 | -1711.4087 | 0.0000      | 0.0000    |
| 8133.8218               | 6992.6937   | 310.1557   | -1141.1280  | 7058.3077 |
| 313.2100                | 20.9487     | 3.3770     | 680285.8938 | -17.9056  |
| -17.8937                |             |            |             |           |
| [37730]ENERGY: 19660000 | 3421.6836   | 5471.3333  | 5665.9713   |           |
| 327.7661                | -14251.3388 | -1839.5413 | 0.0000      | 0.0000    |
| 8200.2029               | 6996.0773   | 312.6870   | -1204.1256  | 7059.8108 |
| 313.1206                | -1.2987     | -24.9277   | 680285.8938 | -13.8323  |
| -13.8658                |             |            |             |           |
| [37780]ENERGY: 19670000 | 3413.0101   | 5546.5655  | 5682.7763   |           |
| 357.6862                | -14318.5162 | -1808.7813 | 0.0000      | 0.0000    |
| 8122.8627               | 6995.6034   | 309.7379   | -1127.2593  | 7060.2932 |
| 312.9862                | -38.6494    | -61.9485   | 680285.8938 | -19.8394  |
| -19.8174                |             |            |             |           |
| [37816]ENERGY: 19680000 | 3443.9368   | 5466.2548  | 5654.3548   |           |
| 358.8450                | -14314.1055 | -1828.8793 | 0.0000      | 0.0000    |
| 8213.5682               | 6993.9748   | 313.1966   | -1219.5934  | 7060.7514 |
| 313.0994                | 0.8920      | -63.3587   | 680285.8938 | -17.3113  |
| -17.3080                |             |            |             |           |
| [37866]ENERGY: 19690000 | 3322.3748   | 5484.4782  | 5674.2419   |           |
| 332.1046                | -14228.3593 | -1787.1033 | 0.0000      | 0.0000    |
| 8197.5523               | 6995.2890   | 312.5859   | -1202.2632  | 7060.9820 |
| 313.0263                | 195.6917    | 79.3284    | 680285.8938 | -15.5095  |
| -15.5072                |             |            |             |           |
| [37905]ENERGY: 19700000 | 3469.4415   | 5493.3832  | 5753.6408   |           |
| 339.6896                | -14286.4714 | -1916.4690 | 0.0000      | 0.0000    |
| 8140.3800               | 6993.5948   | 310.4058   | -1146.7852  | 7061.3219 |
| 312.9436                | -87.9910    | -149.2145  | 680285.8938 | -16.9506  |
| -16.9536                |             |            |             |           |
| [37955]ENERGY: 19710000 | 3325.9743   | 5382.8423  | 5749.1415   |           |
| 351.5888                | -14243.3511 | -1813.2862 | 0.0000      | 0.0000    |

## Supplementary Text 6

|                         |             |            |             |           |
|-------------------------|-------------|------------|-------------|-----------|
| 8239.1741               | 6992.0837   | 314.1730   | -1247.0903  | 7061.6654 |
| 313.0326                | -8.2895     | -74.3060   | 680285.8938 | -17.3029  |
| -17.2898                |             |            |             |           |
| [37991]ENERGY: 19720000 | 3353.3067   | 5468.3458  | 5741.0927   |           |
| 344.3985                | -14399.0841 | -1741.6484 | 0.0000      | 0.0000    |
| 8228.9680               | 6995.3792   | 313.7838   | -1233.5888  | 7061.4617 |
| 313.1582                | 145.9020    | 112.8103   | 680285.8938 | -21.2564  |
| -21.2706                |             |            |             |           |
| [38041]ENERGY: 19730000 | 3385.2454   | 5533.4137  | 5654.4005   |           |
| 327.2091                | -14315.3165 | -1848.8129 | 0.0000      | 0.0000    |
| 8256.7976               | 6992.9370   | 314.8450   | -1263.8606  | 7062.4355 |
| 313.2289                | 51.3464     | -68.8570   | 680285.8938 | -19.0144  |
| -19.0150                |             |            |             |           |
| [38077]ENERGY: 19740000 | 3324.0089   | 5486.8253  | 5686.7272   |           |
| 323.0299                | -14321.4604 | -1747.1126 | 0.0000      | 0.0000    |
| 8241.6396               | 6993.6578   | 314.2670   | -1247.9818  | 7061.3134 |
| 313.3415                | 14.7822     | 60.2203    | 680285.8938 | -17.0445  |
| -17.0381                |             |            |             |           |
| [38127]ENERGY: 19750000 | 3342.2880   | 5526.9359  | 5697.7041   |           |
| 327.1404                | -14204.1800 | -1814.7925 | 0.0000      | 0.0000    |
| 8124.7517               | 6999.8475   | 309.8099   | -1124.9042  | 7061.8180 |
| 313.2754                | 89.8063     | -30.7627   | 680285.8938 | -19.4155  |
| -19.4270                |             |            |             |           |
| [38163]ENERGY: 19760000 | 3376.9625   | 5496.9438  | 5662.2407   |           |
| 322.2409                | -14273.4410 | -1764.5326 | 0.0000      | 0.0000    |
| 8176.1597               | 6996.5741   | 311.7702   | -1179.5857  | 7061.8766 |
| 313.3599                | 128.0667    | 81.1759    | 680285.8938 | -18.5226  |
| -18.5203                |             |            |             |           |
| [38213]ENERGY: 19770000 | 3315.7277   | 5553.3374  | 5710.5029   |           |
| 330.2731                | -14298.0967 | -1811.1945 | 0.0000      | 0.0000    |
| 8193.9353               | 6994.4852   | 312.4480   | -1199.4501  | 7062.9187 |
| 313.0989                | 67.2520     | 32.1992    | 680285.8938 | -18.7648  |
| -18.7624                |             |            |             |           |
| [38249]ENERGY: 19780000 | 3274.1819   | 5534.7281  | 5645.6660   |           |
| 339.6741                | -14324.7872 | -1728.2475 | 0.0000      | 0.0000    |
| 8252.9892               | 6994.2046   | 314.6998   | -1258.7846  | 7061.5880 |
| 313.3024                | 44.7223     | 25.3944    | 680285.8938 | -18.8772  |
| -18.8706                |             |            |             |           |
| [38299]ENERGY: 19790000 | 3389.3720   | 5596.9768  | 5692.6779   |           |
| 347.5111                | -14380.7553 | -1787.7196 | 0.0000      | 0.0000    |
| 8137.5978               | 6995.6607   | 310.2997   | -1141.9371  | 7061.6224 |
| 313.3801                | -238.5599   | -189.1849  | 680285.8938 | -16.3807  |
| -16.3807                |             |            |             |           |
| [38338]ENERGY: 19800000 | 3311.5775   | 5508.2105  | 5698.2225   |           |
| 324.9951                | -14227.9236 | -1857.3103 | 0.0000      | 0.0000    |
| 8240.9693               | 6998.7410   | 314.2414   | -1242.2283  | 7061.4162 |
| 313.2139                | 45.9257     | -0.8681    | 680285.8938 | -18.2184  |
| -18.2229                |             |            |             |           |
| [38388]ENERGY: 19810000 | 3414.5016   | 5575.7419  | 5656.4780   |           |
| 338.9184                | -14370.3204 | -1758.7376 | 0.0000      | 0.0000    |
| 8143.3403               | 6999.9221   | 310.5187   | -1143.4182  | 7062.0307 |
| 313.3273                | 7.2464      | -68.2285   | 680285.8938 | -16.1681  |
| -16.1510                |             |            |             |           |
| [38424]ENERGY: 19820000 | 3347.2760   | 5486.1810  | 5711.6310   |           |

## Supplementary Text 6

|                         |             |            |             |           |
|-------------------------|-------------|------------|-------------|-----------|
| 355.5508                | -14310.4443 | -1839.3966 | 0.0000      | 0.0000    |
| 8245.8560               | 6996.6539   | 314.4278   | -1249.2021  | 7062.8441 |
| 313.5598                | -185.9496   | -134.3820  | 680285.8938 | -18.1113  |
| -18.1276                |             |            |             |           |
| [38474]ENERGY: 19830000 | 3402.7661   | 5523.9346  | 5646.1498   |           |
| 332.4598                | -14299.1263 | -1805.1326 | 0.0000      | 0.0000    |
| 8200.9667               | 7002.0181   | 312.7161   | -1198.9486  | 7063.2618 |
| 313.5726                | -2.2735     | -73.2597   | 680285.8938 | -18.0483  |
| -18.0460                |             |            |             |           |
| [38510]ENERGY: 19840000 | 3308.9397   | 5486.2508  | 5723.0285   |           |
| 345.0765                | -14317.4500 | -1825.0446 | 0.0000      | 0.0000    |
| 8273.5306               | 6994.3316   | 315.4831   | -1279.1990  | 7063.0493 |
| 313.3781                | -21.9804    | -52.6573   | 680285.8938 | -20.1607  |
| -20.1647                |             |            |             |           |
| [38560]ENERGY: 19850000 | 3314.1453   | 5598.7790  | 5677.3295   |           |
| 326.6335                | -14326.3782 | -1765.1924 | 0.0000      | 0.0000    |
| 8174.1194               | 6999.4362   | 311.6924   | -1174.6832  | 7061.9721 |
| 313.3446                | 151.9090    | 121.9282   | 680285.8938 | -18.4744  |
| -18.4843                |             |            |             |           |
| [38596]ENERGY: 19860000 | 3372.3103   | 5520.0311  | 5683.0315   |           |
| 322.1633                | -14302.4618 | -1781.7683 | 0.0000      | 0.0000    |
| 8185.7468               | 6999.0529   | 312.1357   | -1186.6939  | 7063.9208 |
| 313.5157                | 21.6816     | -79.2960   | 680285.8938 | -15.9649  |
| -15.9569                |             |            |             |           |
| [38646]ENERGY: 19870000 | 3314.9510   | 5485.1135  | 5704.9538   |           |
| 339.7699                | -14258.7675 | -1860.5070 | 0.0000      | 0.0000    |
| 8268.6954               | 6994.2091   | 315.2987   | -1274.4864  | 7063.0205 |
| 313.6017                | -4.6975     | -75.2222   | 680285.8938 | -16.9992  |
| -17.0019                |             |            |             |           |
| [38682]ENERGY: 19880000 | 3332.9874   | 5491.4798  | 5684.9150   |           |
| 368.9790                | -14321.0109 | -1833.1402 | 0.0000      | 0.0000    |
| 8267.8039               | 6992.0140   | 315.2647   | -1275.7899  | 7062.7832 |
| 313.5227                | 93.4416     | 11.6285    | 680285.8938 | -19.8042  |
| -19.8012                |             |            |             |           |
| [38732]ENERGY: 19890000 | 3358.7054   | 5456.9419  | 5697.0633   |           |
| 345.1498                | -14342.9098 | -1781.2721 | 0.0000      | 0.0000    |
| 8265.9289               | 6999.6074   | 315.1932   | -1266.3215  | 7063.2059 |
| 313.4430                | -106.9774   | -66.1412   | 680285.8938 | -17.2625  |
| -17.2574                |             |            |             |           |
| [38771]ENERGY: 19900000 | 3382.8797   | 5557.8890  | 5619.6076   |           |
| 317.6656                | -14309.9305 | -1796.1827 | 0.0000      | 0.0000    |
| 8223.3041               | 6995.2327   | 313.5678   | -1228.0713  | 7065.1231 |
| 313.3410                | -79.3824    | -70.9985   | 680285.8938 | -19.6839  |
| -19.6873                |             |            |             |           |
| [38821]ENERGY: 19910000 | 3320.2087   | 5469.8253  | 5648.0320   |           |
| 357.1371                | -14338.0306 | -1802.1869 | 0.0000      | 0.0000    |
| 8340.7241               | 6995.7097   | 318.0453   | -1345.0144  | 7065.0114 |
| 313.3389                | -7.8685     | -17.7984   | 680285.8938 | -18.6273  |
| -18.6366                |             |            |             |           |
| [38857]ENERGY: 19920000 | 3367.6584   | 5555.9640  | 5711.9199   |           |
| 350.1238                | -14419.2223 | -1745.4392 | 0.0000      | 0.0000    |
| 8181.2992               | 7002.3038   | 311.9661   | -1178.9954  | 7065.3979 |
| 313.5938                | 74.8261     | 75.4230    | 680285.8938 | -14.9264  |
| -14.9252                |             |            |             |           |



Supplementary Text 6

|                |             |            |             |           |
|----------------|-------------|------------|-------------|-----------|
| [38907]ENERGY: | 19930000    | 3375.5420  | 5499.2803   | 5686.8278 |
| 354.8375       | -14316.4676 | -1832.3583 | 0.0000      | 0.0000    |
| 8228.8625      | 6996.5242   | 313.7798   | -1232.3383  | 7065.3988 |
| 313.3361       | -79.8627    | -39.7559   | 680285.8938 | -15.8546  |
| -15.8351       |             |            |             |           |
| [38943]ENERGY: | 19940000    | 3426.6488  | 5483.3888   | 5673.9594 |
| 338.7669       | -14378.5350 | -1764.2862 | 0.0000      | 0.0000    |
| 8218.5766      | 6998.5193   | 313.3876   | -1220.0574  | 7064.2667 |
| 313.4854       | -96.6654    | -128.9283  | 680285.8938 | -13.9583  |
| -13.9957       |             |            |             |           |
| [38993]ENERGY: | 19950000    | 3342.6746  | 5610.3571   | 5675.7942 |
| 328.0389       | -14373.3914 | -1802.9296 | 0.0000      | 0.0000    |
| 8219.9172      | 7000.4610   | 313.4387   | -1219.4562  | 7064.8902 |
| 313.5459       | -5.2780     | -14.0102   | 680285.8938 | -15.9811  |
| -15.9603       |             |            |             |           |
| [39029]ENERGY: | 19960000    | 3378.6296  | 5511.0533   | 5643.9327 |
| 351.5816       | -14401.5421 | -1707.0146 | 0.0000      | 0.0000    |
| 8224.8407      | 7001.4811   | 313.6264   | -1223.3596  | 7065.5264 |
| 313.4776       | 43.4573     | -14.5538   | 680285.8938 | -11.4871  |
| -11.4874       |             |            |             |           |
| [39079]ENERGY: | 19970000    | 3335.5675  | 5532.1497   | 5627.0179 |
| 365.5352       | -14297.2205 | -1738.8833 | 0.0000      | 0.0000    |
| 8177.5803      | 7001.7467   | 311.8243   | -1175.8336  | 7066.0082 |
| 313.4959       | 93.8188     | 74.1461    | 680285.8938 | -11.7768  |
| -11.7689       |             |            |             |           |
| [39115]ENERGY: | 19980000    | 3298.8616  | 5496.7805   | 5674.2880 |
| 338.1849       | -14227.4544 | -1785.9114 | 0.0000      | 0.0000    |
| 8205.2920      | 7000.0411   | 312.8810   | -1205.2508  | 7065.2333 |
| 313.5759       | 30.0263     | 69.8218    | 680285.8938 | -17.3011  |
| -17.2999       |             |            |             |           |
| [39165]ENERGY: | 19990000    | 3334.5185  | 5540.8533   | 5701.0846 |
| 350.7088       | -14310.1089 | -1818.3988 | 0.0000      | 0.0000    |
| 8196.3170      | 6994.9745   | 312.5388   | -1201.3425  | 7064.2955 |
| 313.4313       | 25.9149     | -37.2285   | 680285.8938 | -15.6209  |
| -15.6200       |             |            |             |           |
| [39204]ENERGY: | 20000000    | 3315.8443  | 5414.0699   | 5699.4810 |
| 353.2916       | -14209.1049 | -1817.4286 | 0.0000      | 0.0000    |
| 8242.8199      | 6998.9732   | 314.3120   | -1243.8467  | 7065.5496 |
| 313.5060       | 115.1911    | 31.4431    | 680285.8938 | -17.6691  |
| -17.6759       |             |            |             |           |

40.1ns Q8LJP6 SIMULATION DATA

|              | TS          | BOND       | ANGLE       | DIHED      | IMPRP      |
|--------------|-------------|------------|-------------|------------|------------|
|              | ELECT       | VDW        | BOUNDARY    | MISC       | KINETIC    |
|              | TOTAL       | TEMP       | POTENTIAL   | TOTAL3     | TEMPAVG    |
|              | PRESSURE    | GPPRESSURE | VOLUME      | PRESSAVG   | GPPRESSAVG |
| [191]ENERGY: | 0           | 4825.7375  | 5324.7236   | 5641.4695  | 295.6590   |
|              | -9244.6331  | -1762.6473 | 0.0000      | 0.0000     | 7582.2299  |
|              | 12662.5391  | 296.4687   | 5080.3092   | 12770.8391 | 296.4687   |
|              | 2869.8628   | 504.4981   | 718822.6829 | 2869.8628  | 504.4981   |
| [279]ENERGY: | 10000       | 3207.6936  | 5275.1286   | 5637.9631  | 340.6081   |
|              | -13675.3958 | -1595.4022 | 0.0000      | 0.0000     | 7715.6098  |
|              | 6906.2051   | 301.6839   | -809.4047   | 6966.9136  | 321.4630   |

## Supplementary Text 6

|              |             |            |             |           |           |
|--------------|-------------|------------|-------------|-----------|-----------|
|              | -19.1770    | 26.0408    | 671341.7472 | -5.2476   | -5.1047   |
| [318]ENERGY: | 20000       | 3149.8881  | 5202.4290   | 5596.9617 | 331.1071  |
|              | -13824.9602 | -1580.2266 | 0.0000      | 0.0000    | 7591.4949 |
|              | 6466.6941   | 296.8309   | -1124.8008  | 6527.5675 | 300.1132  |
|              | 183.2514    | 78.5816    | 671614.5889 | 0.3868    | 0.3722    |
| [370]ENERGY: | 30000       | 3181.1358  | 5135.8029   | 5566.2936 | 330.6999  |
|              | -13948.4391 | -1570.7178 | 0.0000      | 0.0000    | 7573.9534 |
|              | 6268.7287   | 296.1450   | -1305.2247  | 6328.9724 | 298.2765  |
|              | -54.6593    | -45.8716   | 674320.6968 | 0.0007    | 0.0294    |
| [408]ENERGY: | 40000       | 3190.0070  | 5237.7604   | 5577.0545 | 331.3075  |
|              | -13949.8435 | -1639.1522 | 0.0000      | 0.0000    | 7663.2848 |
|              | 6410.4185   | 299.6379   | -1252.8663  | 6474.2867 | 298.5818  |
|              | 78.2373     | 55.4913    | 630912.4250 | 1.3771    | 1.3418    |
| [460]ENERGY: | 50000       | 3156.4891  | 5190.3730   | 5563.2384 | 339.9715  |
|              | -13931.2816 | -1672.2100 | 0.0000      | 0.0000    | 7600.6186 |
|              | 6247.1991   | 297.1877   | -1353.4196  | 6309.6681 | 298.6943  |
|              | -19.1232    | -55.3864   | 628905.1138 | 1.5852    | 1.6226    |
| [498]ENERGY: | 60000       | 3217.1413  | 5254.1283   | 5473.0069 | 308.1163  |
|              | -13901.9547 | -1637.8486 | 0.0000      | 0.0000    | 7676.1919 |
|              | 6388.7814   | 300.1426   | -1287.4105  | 6449.6946 | 298.5016  |
|              | 52.3279     | 38.3390    | 661707.3109 | 3.2082    | 3.1954    |
| [549]ENERGY: | 70000       | 3238.3290  | 5159.3004   | 5556.0584 | 302.1582  |
|              | -13921.0565 | -1599.7070 | 0.0000      | 0.0000    | 7629.2459 |
|              | 6364.3283   | 298.3070   | -1264.9176  | 6426.3273 | 300.3755  |
|              | 34.2303     | 6.6902     | 655110.8926 | -1.9675   | -1.9664   |
| [586]ENERGY: | 80000       | 3133.3989  | 5266.8915   | 5537.7790 | 326.8946  |
|              | -13945.0575 | -1642.0673 | 0.0000      | 0.0000    | 7650.8094 |
|              | 6328.6486   | 299.1501   | -1322.1608  | 6390.4326 | 299.8738  |
|              | 323.2783    | 237.2277   | 665564.1026 | -2.8420   | -2.8502   |
| [637]ENERGY: | 90000       | 3148.0606  | 5283.1731   | 5508.2306 | 324.1648  |
|              | -14006.7121 | -1640.1755 | 0.0000      | 0.0000    | 7768.3559 |
|              | 6385.0974   | 303.7463   | -1383.2585  | 6448.0192 | 299.6132  |
|              | 56.8380     | 59.4680    | 683543.2700 | 3.2391    | 3.2776    |
| [677]ENERGY: | 100000      | 3134.2633  | 5310.4758   | 5509.6777 | 316.9759  |
|              | -13993.6709 | -1679.1044 | 0.0000      | 0.0000    | 7639.5057 |
|              | 6238.1232   | 298.7082   | -1401.3825  | 6302.6979 | 301.5901  |
|              | 3.6846      | 13.4831    | 704957.5497 | 4.7689    | 4.7837    |
| [728]ENERGY: | 110000      | 3272.8075  | 5285.3915   | 5501.4445 | 329.5293  |
|              | -14020.7761 | -1650.6279 | 0.0000      | 0.0000    | 7693.3443 |
|              | 6411.1131   | 300.8133   | -1282.2312  | 6470.9468 | 300.7788  |
|              | 41.3354     | 86.9024    | 693546.0255 | 2.6557    | 2.6355    |
| [764]ENERGY: | 120000      | 3173.4677  | 5233.4588   | 5484.4159 | 318.6371  |
|              | -13934.6420 | -1679.6000 | 0.0000      | 0.0000    | 7787.2173 |
|              | 6382.9547   | 304.4838   | -1404.2626  | 6443.7592 | 300.6300  |
|              | 134.0875    | -8.1535    | 698191.8440 | 0.2774    | 0.2643    |
| [814]ENERGY: | 130000      | 3159.5513  | 5308.2470   | 5524.5601 | 300.4078  |
|              | -13951.6726 | -1728.5142 | 0.0000      | 0.0000    | 7615.6493 |
|              | 6228.2287   | 297.7754   | -1387.4206  | 6290.5889 | 299.1196  |
|              | 83.2206     | -27.4734   | 690565.0632 | 1.3824    | 1.3677    |
| [850]ENERGY: | 140000      | 3220.7511  | 5187.5435   | 5476.4798 | 317.8856  |
|              | -13940.3662 | -1708.5407 | 0.0000      | 0.0000    | 7703.1248 |
|              | 6256.8779   | 301.1957   | -1446.2469  | 6319.2648 | 299.8096  |
|              | 29.1188     | 20.8814    | 692871.8460 | 2.2105    | 2.2157    |
| [900]ENERGY: | 150000      | 3172.2852  | 5161.2838   | 5555.2567 | 303.9391  |

Supplementary Text 6

|               |             |             |             |             |           |
|---------------|-------------|-------------|-------------|-------------|-----------|
|               | -14046.9971 | -1634.7064  | 0.0000      | 0.0000      | 7727.7767 |
|               | 6238.8380   | 302.1596    | -1488.9387  | 6302.6868   | 301.4051  |
|               | 40.6683     | 60.6253     | 692819.0048 | 2.0534      | 2.0474    |
| [936]ENERGY:  | 160000      | 3197.7610   | 5312.4626   | 5501.2550   | 318.5999  |
|               | -13950.3584 | -1751.7483  | 0.0000      | 0.0000      | 7548.8722 |
|               | 6176.8441   | 295.1644    | -1372.0281  | 6235.9428   | 300.3564  |
|               | 1.9669      | 19.4204     | 709437.4397 | 3.0320      | 3.0190    |
| [986]ENERGY:  | 170000      | 3216.0505   | 5237.6703   | 5472.0475   | 323.9349  |
|               | -13981.7234 | -1712.0234  | 0.0000      | 0.0000      | 7696.7279 |
|               | 6252.6843   | 300.9456    | -1444.0436  | 6316.4098   | 300.3456  |
|               | 101.8253    | -27.5106    | 730521.5215 | -1.7520     | -1.7511   |
| [1022]ENERGY: | 180000      | 3203.4625   | 5183.6633   | 5503.4093   |           |
|               | 305.6517    | -13994.2809 | -1776.9255  | 0.0000      | 0.0000    |
|               | 7627.4884   | 6052.4688   | 298.2383    | -1575.0196  | 6113.0599 |
|               | 299.2014    | -11.0809    | 50.2572     | 716815.8351 | -0.0458   |
|               | -0.0727     |             |             |             |           |
| [1072]ENERGY: | 190000      | 3183.1978   | 5195.2756   | 5541.3142   |           |
|               | 319.5725    | -14125.3550 | -1590.1547  | 0.0000      | 0.0000    |
|               | 7673.8879   | 6197.7383   | 300.0525    | -1476.1495  | 6262.0125 |
|               | 298.0152    | 28.7415     | 47.8967     | 699454.4790 | 4.0254    |
|               | 4.0155      |             |             |             |           |
| [1111]ENERGY: | 200000      | 3154.8594   | 5230.3512   | 5529.4449   |           |
|               | 316.7139    | -14069.2097 | -1667.0550  | 0.0000      | 0.0000    |
|               | 7627.3103   | 6122.4150   | 298.2313    | -1504.8953  | 6182.3669 |
|               | 298.9073    | 11.5123     | 91.2973     | 676773.0766 | 5.1370    |
|               | 5.1453      |             |             |             |           |
| [1161]ENERGY: | 210000      | 3167.0488   | 5209.1065   | 5501.7613   |           |
|               | 337.7381    | -14099.8470 | -1670.7570  | 0.0000      | 0.0000    |
|               | 7699.1177   | 6144.1684   | 301.0390    | -1554.9492  | 6210.7260 |
|               | 298.2521    | 93.6728     | 45.6057     | 681432.2371 | -0.7892   |
|               | -0.7954     |             |             |             |           |
| [1197]ENERGY: | 220000      | 3230.1740   | 5264.5169   | 5503.4116   |           |
|               | 343.2371    | -14125.1510 | -1659.9842  | 0.0000      | 0.0000    |
|               | 7632.9412   | 6189.1456   | 298.4515    | -1443.7955  | 6250.5148 |
|               | 298.9734    | 147.7541    | 116.6700    | 656028.4447 | 2.9393    |
|               | 2.9439      |             |             |             |           |
| [1247]ENERGY: | 230000      | 3247.9918   | 5163.9306   | 5480.2357   |           |
|               | 313.2978    | -14082.9978 | -1681.6638  | 0.0000      | 0.0000    |
|               | 7629.5805   | 6070.3747   | 298.3201    | -1559.2058  | 6130.7319 |
|               | 300.2094    | 1.7180      | 15.1082     | 670832.8216 | -0.6506   |
|               | -0.6455     |             |             |             |           |
| [1283]ENERGY: | 240000      | 3171.2147   | 5284.1186   | 5482.6760   |           |
|               | 314.2209    | -14088.8646 | -1703.9184  | 0.0000      | 0.0000    |
|               | 7642.8284   | 6102.2756   | 298.8381    | -1540.5528  | 6167.0340 |
|               | 298.1940    | -34.8040    | -33.3967    | 673632.0742 | -1.0367   |
|               | -1.0342     |             |             |             |           |
| [1333]ENERGY: | 250000      | 3149.3999   | 5294.5800   | 5436.4876   |           |
|               | 346.2894    | -14161.2286 | -1610.4402  | 0.0000      | 0.0000    |
|               | 7608.2592   | 6063.3473   | 297.4864    | -1544.9120  | 6127.1941 |
|               | 298.5357    | 83.7497     | 68.3522     | 685066.8939 | 5.8604    |
|               | 5.8278      |             |             |             |           |
| [1369]ENERGY: | 260000      | 3225.5925   | 5118.3850   | 5419.8981   |           |
|               | 311.5559    | -14000.5955 | -1697.8359  | 0.0000      | 0.0000    |
|               | 7662.8957   | 6039.8957   | 299.6227    | -1623.0000  | 6101.9254 |

## Supplementary Text 6

|               |             |            |             |           |
|---------------|-------------|------------|-------------|-----------|
| 299.1289      | -212.8030   | -135.6024  | 698988.1237 | -1.7838   |
| -1.7814       |             |            |             |           |
| [1419]ENERGY: | 270000      | 3262.2448  | 5211.7726   | 5439.9850 |
| 312.9182      | -14109.2568 | -1668.5242 | 0.0000      | 0.0000    |
| 7627.8134     | 6076.9530   | 298.2510   | -1550.8605  | 6136.7628 |
| 297.8302      | 32.6460     | -60.1177   | 691315.3461 | 2.2743    |
| 2.2921        |             |            |             |           |
| [1455]ENERGY: | 280000      | 3179.5923  | 5205.0978   | 5457.7145 |
| 310.5933      | -14129.6538 | -1663.8158 | 0.0000      | 0.0000    |
| 7570.3249     | 5929.8532   | 296.0032   | -1640.4717  | 5997.3552 |
| 298.0936      | 7.9115      | 3.6230     | 716556.8775 | -0.5323   |
| -0.5316       |             |            |             |           |
| [1505]ENERGY: | 290000      | 3208.9937  | 5289.9287   | 5511.5684 |
| 317.7886      | -14124.0019 | -1735.2212 | 0.0000      | 0.0000    |
| 7691.7707     | 6160.8269   | 300.7518   | -1530.9438  | 6222.5134 |
| 298.2721      | 64.3110     | 8.4665     | 719242.1461 | 2.2057    |
| 2.2027        |             |            |             |           |
| [1544]ENERGY: | 300000      | 3127.8994  | 5159.0971   | 5512.5592 |
| 315.8513      | -14080.5476 | -1672.0867 | 0.0000      | 0.0000    |
| 7750.3024     | 6113.0751   | 303.0404   | -1637.2274  | 6180.3636 |
| 300.3918      | 67.8732     | 57.6109    | 663216.7458 | -4.3288   |
| -4.3437       |             |            |             |           |
| [1594]ENERGY: | 310000      | 3166.6262  | 5159.0435   | 5540.7864 |
| 326.1186      | -14004.9791 | -1705.4744 | 0.0000      | 0.0000    |
| 7709.3739     | 6191.4950   | 301.4400   | -1517.8788  | 6255.4469 |
| 298.7531      | 57.0864     | -48.6293   | 652600.6578 | 4.4120    |
| 4.4101        |             |            |             |           |
| [1630]ENERGY: | 320000      | 3194.6519  | 5137.7509   | 5463.7066 |
| 320.6484      | -14069.0620 | -1691.0534 | 0.0000      | 0.0000    |
| 7529.9565     | 5886.5990   | 294.4247   | -1643.3575  | 5947.1280 |
| 297.0757      | 31.6550     | -61.2296   | 657862.8409 | -0.2126   |
| -0.2063       |             |            |             |           |
| [1680]ENERGY: | 330000      | 3151.7368  | 5158.0687   | 5473.0229 |
| 321.0034      | -14084.2482 | -1641.5155 | 0.0000      | 0.0000    |
| 7568.9167     | 5946.9847   | 295.9481   | -1621.9320  | 6012.2274 |
| 297.0223      | 80.9591     | -7.4396    | 662343.6741 | 3.8245    |
| 3.8056        |             |            |             |           |
| [1716]ENERGY: | 340000      | 3220.1281  | 5317.5182   | 5496.4321 |
| 304.5560      | -14133.4557 | -1715.8649 | 0.0000      | 0.0000    |
| 7526.3629     | 6015.6767   | 294.2842   | -1510.6862  | 6075.3067 |
| 298.0336      | 73.1866     | -24.8080   | 642678.2909 | 0.4703    |
| 0.4821        |             |            |             |           |
| [1766]ENERGY: | 350000      | 3266.3500  | 5296.4363   | 5468.4957 |
| 330.9260      | -14161.7808 | -1772.9119 | 0.0000      | 0.0000    |
| 7673.4188     | 6100.9341   | 300.0342   | -1572.4847  | 6164.6111 |
| 298.4271      | -83.1604    | -143.5563  | 666252.9139 | 0.7581    |
| 0.7676        |             |            |             |           |
| [1802]ENERGY: | 360000      | 3146.7320  | 5170.9279   | 5409.7478 |
| 324.0193      | -14099.7295 | -1601.3462 | 0.0000      | 0.0000    |
| 7569.4728     | 5919.8241   | 295.9699   | -1649.6487  | 5978.3047 |
| 298.2576      | 115.7125    | 90.9189    | 657272.3717 | 1.4032    |
| 1.3960        |             |            |             |           |
| [1852]ENERGY: | 370000      | 3165.3502  | 5271.5517   | 5479.7902 |
| 301.1891      | -14112.9218 | -1649.2654 | 0.0000      | 0.0000    |

Supplementary Text 6

|               |             |            |             |           |
|---------------|-------------|------------|-------------|-----------|
| 7643.8164     | 6099.5105   | 298.8767   | -1544.3059  | 6162.6860 |
| 298.4695      | 55.7563     | 27.5310    | 682108.5685 | -1.1780   |
| -1.1651       |             |            |             |           |
| [1888]ENERGY: | 380000      | 3100.8534  | 5216.8210   | 5494.3445 |
| 342.3288      | -14112.6829 | -1718.7477 | 0.0000      | 0.0000    |
| 7672.6555     | 5995.5726   | 300.0043   | -1677.0829  | 6059.3475 |
| 298.9415      | 208.2194    | 121.3972   | 678227.1882 | -3.8919   |
| -3.9079       |             |            |             |           |
| [1938]ENERGY: | 390000      | 3132.0725  | 5122.0896   | 5507.6832 |
| 306.3184      | -14093.7759 | -1670.0501 | 0.0000      | 0.0000    |
| 7501.9028     | 5806.2405   | 293.3278   | -1695.6623  | 5862.7003 |
| 295.0688      | 81.9529     | -0.4604    | 682021.0348 | -1.8560   |
| -1.8823       |             |            |             |           |
| [1977]ENERGY: | 400000      | 3188.2410  | 5179.2022   | 5482.7744 |
| 310.0823      | -14045.9924 | -1770.0990 | 0.0000      | 0.0000    |
| 7755.2696     | 6099.4781   | 303.2346   | -1655.7915  | 6165.0416 |
| 297.1081      | -138.5724   | -29.8745   | 667169.3578 | 1.8998    |
| 1.9149        |             |            |             |           |
| [2027]ENERGY: | 410000      | 3227.9930  | 5212.5200   | 5533.9786 |
| 335.9363      | -14138.9613 | -1726.0647 | 0.0000      | 0.0000    |
| 7504.5778     | 5949.9797   | 293.4324   | -1554.5981  | 6011.4630 |
| 297.1169      | 41.7281     | 1.3475     | 672218.6170 | 2.8310    |
| 2.8404        |             |            |             |           |
| [2063]ENERGY: | 420000      | 3165.4822  | 5192.0029   | 5535.6506 |
| 306.7445      | -14130.9667 | -1645.2822 | 0.0000      | 0.0000    |
| 7567.8759     | 5991.5072   | 295.9074   | -1576.3687  | 6056.5162 |
| 299.0656      | -99.8361    | -96.0929   | 683823.1495 | 0.3041    |
| 0.3017        |             |            |             |           |
| [2113]ENERGY: | 430000      | 3215.9323  | 5196.7794   | 5482.6209 |
| 322.7668      | -14259.1607 | -1572.0358 | 0.0000      | 0.0000    |
| 7564.6061     | 5951.5090   | 295.7796   | -1613.0971  | 6015.1601 |
| 296.9798      | 91.9531     | 115.3779   | 649135.0679 | 0.4941    |
| 0.4542        |             |            |             |           |
| [2149]ENERGY: | 440000      | 3176.6525  | 5313.8393   | 5514.0539 |
| 326.1144      | -14214.8401 | -1654.8835 | 0.0000      | 0.0000    |
| 7642.7309     | 6103.6674   | 298.8343   | -1539.0636  | 6168.4071 |
| 298.7760      | -95.5689    | -48.2877   | 641225.6748 | -1.1752   |
| -1.1321       |             |            |             |           |
| [2199]ENERGY: | 450000      | 3202.7286  | 5122.8624   | 5478.0199 |
| 335.8013      | -14136.0024 | -1691.9034 | 0.0000      | 0.0000    |
| 7586.3812     | 5897.8876   | 296.6310   | -1688.4936  | 5962.8081 |
| 298.4343      | 24.6386     | -41.5415   | 629154.2351 | 0.4058    |
| 0.3928        |             |            |             |           |
| [2235]ENERGY: | 460000      | 3194.1707  | 5247.7174   | 5476.8390 |
| 315.3845      | -14034.1001 | -1748.4748 | 0.0000      | 0.0000    |
| 7734.9805     | 6186.5172   | 302.4413   | -1548.4632  | 6250.7580 |
| 298.1630      | 1.1290      | -134.3915  | 649005.4468 | 0.6558    |
| 0.6136        |             |            |             |           |
| [2285]ENERGY: | 470000      | 3253.5079  | 5246.2612   | 5483.5793 |
| 328.7802      | -14204.5052 | -1661.4596 | 0.0000      | 0.0000    |
| 7661.1827     | 6107.3465   | 299.5558   | -1553.8363  | 6170.6054 |
| 301.3081      | 6.0064      | 8.4037     | 632383.9201 | 3.1167    |
| 3.1301        |             |            |             |           |
| [2321]ENERGY: | 480000      | 3170.9905  | 5251.9664   | 5494.4038 |

## Supplementary Text 6

|               |             |            |             |           |
|---------------|-------------|------------|-------------|-----------|
| 310.8398      | -14128.5598 | -1639.3572 | 0.0000      | 0.0000    |
| 7623.7021     | 6083.9856   | 298.0902   | -1539.7166  | 6141.9058 |
| 300.0841      | 110.6643    | 35.1574    | 618088.9235 | 1.0781    |
| 1.0696        |             |            |             |           |
| [2371]ENERGY: | 490000      | 3201.3230  | 5191.3811   | 5536.2684 |
| 322.2892      | -14212.2729 | -1685.0878 | 0.0000      | 0.0000    |
| 7566.6715     | 5920.5724   | 295.8603   | -1646.0991  | 5981.9096 |
| 298.4466      | -76.5195    | -61.1883   | 603134.7622 | -2.0537   |
| -2.0402       |             |            |             |           |
| [2410]ENERGY: | 500000      | 3230.7809  | 5147.2431   | 5528.2240 |
| 296.9720      | -14128.7693 | -1651.6630 | 0.0000      | 0.0000    |
| 7579.4397     | 6002.2274   | 296.3596   | -1577.2123  | 6061.2263 |
| 296.8549      | 152.1187    | -15.2777   | 603948.5095 | 0.0796    |
| 0.0365        |             |            |             |           |
| [2460]ENERGY: | 510000      | 3159.3759  | 5275.8924   | 5521.0978 |
| 323.2543      | -14160.0011 | -1668.7438 | 0.0000      | 0.0000    |
| 7600.0692     | 6050.9448   | 297.1662   | -1549.1244  | 6116.5791 |
| 297.7435      | 207.1361    | 171.6650   | 591018.1983 | 1.5024    |
| 1.5328        |             |            |             |           |
| [2496]ENERGY: | 520000      | 3150.3025  | 5238.4652   | 5545.4200 |
| 312.8538      | -14146.0530 | -1717.7446 | 0.0000      | 0.0000    |
| 7619.0204     | 6002.2643   | 297.9072   | -1616.7561  | 6066.6875 |
| 297.7474      | -21.0754    | -117.5450  | 595239.4883 | 4.1867    |
| 4.1825        |             |            |             |           |
| [2546]ENERGY: | 530000      | 3110.0141  | 5225.7586   | 5478.9499 |
| 281.8321      | -14190.8002 | -1636.1457 | 0.0000      | 0.0000    |
| 7659.5464     | 5929.1553   | 299.4918   | -1730.3912  | 5994.4300 |
| 297.6570      | 221.6747    | 125.7922   | 611440.6140 | -7.4699   |
| -7.4803       |             |            |             |           |
| [2582]ENERGY: | 540000      | 3246.5003  | 5254.4550   | 5523.0099 |
| 316.1619      | -14175.3017 | -1711.9310 | 0.0000      | 0.0000    |
| 7678.5853     | 6131.4797   | 300.2362   | -1547.1056  | 6195.7335 |
| 298.5582      | -37.8575    | -83.5111   | 592836.3056 | 2.4713    |
| 2.4741        |             |            |             |           |
| [2632]ENERGY: | 550000      | 3196.7366  | 5241.7333   | 5504.6677 |
| 323.7017      | -14083.2223 | -1675.8282 | 0.0000      | 0.0000    |
| 7543.7395     | 6051.5282   | 294.9637   | -1492.2113  | 6112.3310 |
| 299.7362      | 139.8902    | 56.7691    | 597548.4805 | 1.2361    |
| 1.2492        |             |            |             |           |
| [2668]ENERGY: | 560000      | 3160.9721  | 5269.1701   | 5558.4655 |
| 327.2357      | -14175.3073 | -1712.2117 | 0.0000      | 0.0000    |
| 7545.7628     | 5974.0872   | 295.0428   | -1571.6757  | 6034.8187 |
| 297.8485      | 25.2916     | -14.5210   | 612584.9942 | 3.3438    |
| 3.3818        |             |            |             |           |
| [2718]ENERGY: | 570000      | 3178.4423  | 5200.5543   | 5548.2792 |
| 307.0462      | -14143.1066 | -1671.5394 | 0.0000      | 0.0000    |
| 7607.6741     | 6027.3500   | 297.4635   | -1580.3241  | 6091.5436 |
| 298.1492      | 21.2374     | -17.6019   | 607933.7578 | -1.8291   |
| -1.8532       |             |            |             |           |
| [2754]ENERGY: | 580000      | 3211.3373  | 5257.4790   | 5507.6691 |
| 298.8225      | -14090.8230 | -1685.8960 | 0.0000      | 0.0000    |
| 7601.3608     | 6099.9497   | 297.2167   | -1501.4111  | 6160.9906 |
| 299.2976      | 139.2734    | 116.8220   | 646665.9374 | -0.6408   |
| -0.6449       |             |            |             |           |

## Supplementary Text 6

|               |             |            |             |           |
|---------------|-------------|------------|-------------|-----------|
| [2804]ENERGY: | 590000      | 3180.2494  | 5246.4579   | 5493.1731 |
| 312.8397      | -14101.7262 | -1742.9409 | 0.0000      | 0.0000    |
| 7605.0991     | 5993.1522   | 297.3629   | -1611.9470  | 6052.6279 |
| 299.9419      | -53.3330    | -140.1889  | 625943.8043 | 2.5141    |
| 2.4936        |             |            |             |           |
| [2843]ENERGY: | 600000      | 3139.6611  | 5250.0079   | 5458.2493 |
| 310.4929      | -14143.3432 | -1703.8135 | 0.0000      | 0.0000    |
| 7557.0342     | 5868.2888   | 295.4835   | -1688.7454  | 5930.9823 |
| 299.1656      | -26.0180    | -8.1851    | 644026.0798 | 3.7310    |
| 3.7591        |             |            |             |           |
| [2893]ENERGY: | 610000      | 3217.2688  | 5114.3993   | 5507.2074 |
| 332.1408      | -14096.7760 | -1801.5053 | 0.0000      | 0.0000    |
| 7713.4490     | 5986.1841   | 301.5994   | -1727.2649  | 6048.4138 |
| 297.5501      | 53.0706     | -79.4223   | 647182.2944 | -1.8298   |
| -1.8423       |             |            |             |           |
| [2929]ENERGY: | 620000      | 3210.6548  | 5294.9019   | 5513.3782 |
| 341.4890      | -14086.1075 | -1776.4620 | 0.0000      | 0.0000    |
| 7588.5840     | 6086.4383   | 296.7171   | -1502.1457  | 6149.8715 |
| 298.1988      | -143.1521   | -2.4047    | 656516.4358 | -0.3907   |
| -0.3793       |             |            |             |           |
| [2979]ENERGY: | 630000      | 3254.9755  | 5226.3642   | 5523.9240 |
| 326.5812      | -14155.1582 | -1663.3466 | 0.0000      | 0.0000    |
| 7643.3796     | 6156.7196   | 298.8596   | -1486.6600  | 6218.6955 |
| 298.7348      | 30.2154     | -3.5412    | 663513.7250 | 1.0703    |
| 1.0922        |             |            |             |           |
| [3015]ENERGY: | 640000      | 3162.6554  | 5177.5220   | 5517.3976 |
| 322.9595      | -14141.7063 | -1664.9902 | 0.0000      | 0.0000    |
| 7647.7969     | 6021.6350   | 299.0324   | -1626.1620  | 6083.5519 |
| 298.8410      | 32.2018     | 92.7894    | 652712.0362 | -1.3109   |
| -1.2985       |             |            |             |           |
| [3065]ENERGY: | 650000      | 3141.5643  | 5152.4374   | 5525.7948 |
| 319.9497      | -14097.4902 | -1729.8477 | 0.0000      | 0.0000    |
| 7644.8776     | 5957.2858   | 298.9182   | -1687.5918  | 6018.1044 |
| 298.9213      | 119.1363    | -15.5433   | 657779.4320 | 0.6602    |
| 0.6312        |             |            |             |           |
| [3101]ENERGY: | 660000      | 3178.5661  | 5213.6609   | 5431.1324 |
| 311.7142      | -14183.1129 | -1612.7737 | 0.0000      | 0.0000    |
| 7606.9900     | 5946.1769   | 297.4368   | -1660.8131  | 6007.1291 |
| 297.2168      | 7.2777      | 30.1774    | 639252.1170 | -2.0630   |
| -2.0638       |             |            |             |           |
| [3151]ENERGY: | 670000      | 3237.1552  | 5247.5467   | 5482.6286 |
| 311.6235      | -14162.4850 | -1684.0767 | 0.0000      | 0.0000    |
| 7511.5750     | 5943.9674   | 293.7060   | -1567.6076  | 6004.2360 |
| 298.0805      | -38.4109    | -16.8664   | 617790.6021 | -2.9196   |
| -2.9114       |             |            |             |           |
| [3187]ENERGY: | 680000      | 3150.5209  | 5225.0376   | 5473.8021 |
| 320.0579      | -14092.9812 | -1759.0590 | 0.0000      | 0.0000    |
| 7538.5617     | 5855.9401   | 294.7612   | -1682.6216  | 5918.5995 |
| 297.4763      | -36.3602    | -68.2010   | 583842.9402 | 5.2118    |
| 5.2143        |             |            |             |           |
| [3237]ENERGY: | 690000      | 3159.4901  | 5272.9820   | 5513.8699 |
| 313.0658      | -14213.5114 | -1670.3568 | 0.0000      | 0.0000    |
| 7669.3224     | 6044.8620   | 299.8740   | -1624.4604  | 6107.5991 |
| 298.5108      | 159.5797    | 104.8781   | 589601.5533 | 0.6852    |

Supplementary Text 6

|               |             |             |             |           |          |
|---------------|-------------|-------------|-------------|-----------|----------|
| 0.6544        |             |             |             |           |          |
| [3276]ENERGY: | 700000      | 3179.6756   | 5241.2386   | 5518.7736 |          |
| 322.3114      | -14204.2760 | -1684.6371  | 0.0000      | 0.0000    |          |
| 7580.8332     | 5953.9193   | 296.4140    | -1626.9139  | 6017.0115 |          |
| 297.8344      | -54.5929    | -66.0844    | 572892.7831 | 0.3040    |          |
| 0.3476        |             |             |             |           |          |
| [3326]ENERGY: | 710000      | 3187.4944   | 5181.7025   | 5507.4651 |          |
| 336.3667      | -14156.8944 | -1700.0440  | 0.0000      | 0.0000    |          |
| 7669.0675     | 6025.1578   | 299.8640    | -1643.9097  | 6088.5649 |          |
| 298.1604      | -98.6580    | -130.1614   | 565673.4489 | 1.1296    |          |
| 1.1028        |             |             |             |           |          |
| [3362]ENERGY: | 720000      | 3175.7428   | 5222.1522   | 5421.5118 |          |
| 309.1209      | -14063.6557 | -1749.1710  | 0.0000      | 0.0000    |          |
| 7732.4581     | 6048.1590   | 302.3426    | -1684.2990  | 6111.8369 |          |
| 299.6518      | 32.4442     | -67.6525    | 568525.6612 | 0.0355    |          |
| 0.0444        |             |             |             |           |          |
| [3412]ENERGY: | 730000      | 3178.0021   | 5150.5679   | 5462.3951 |          |
| 324.8491      | -14243.3236 | -1691.1954  | 0.0000      | 0.0000    |          |
| 7625.9542     | 5807.2494   | 298.1783    | -1818.7048  | 5872.4242 |          |
| 298.2450      | -12.4343    | -14.8937    | 556473.5261 | 0.4922    |          |
| 0.4808        |             |             |             |           |          |
| [3448]ENERGY: | 740000      | 3211.6268   | 5154.3371   | 5447.9762 |          |
| 313.5540      | -14149.2952 | -1661.2088  | 0.0000      | 0.0000    |          |
| 7475.0406     | 5792.0306   | 292.2775    | -1683.0100  | 5851.7211 |          |
| 298.7068      | 71.4434     | 71.1251     | 538945.2063 | 0.7503    |          |
| 0.7495        |             |             |             |           |          |
| [3498]ENERGY: | 750000      | 3157.5150   | 5293.6925   | 5521.2970 |          |
| 312.2221      | -14157.7117 | -1740.4561  | 0.0000      | 0.0000    |          |
| 7607.3507     | 5993.9095   | 297.4509    | -1613.4412  | 6053.8539 |          |
| 296.4732      | -153.3649   | -110.4382   | 511540.4688 | 3.8760    |          |
| 3.8782        |             |             |             |           |          |
| [266]ENERGY:  | 760000      | 3197.8384   | 5216.7852   | 5542.7027 | 334.9515 |
| -14173.9059   | -1667.6730  | 0.0000      | 0.0000      | 7542.9030 |          |
| 5993.6020     | 294.9653    | -1549.3010  | 6054.9761   | 298.7688  |          |
| -113.6951     | -227.3699   | 511540.4688 | -2.2748     | -2.2676   |          |
| [305]ENERGY:  | 770000      | 3225.5945   | 5195.6890   | 5478.5354 | 330.7931 |
| -14174.7753   | -1661.4917  | 0.0000      | 0.0000      | 7601.0488 |          |
| 5995.3937     | 297.2391    | -1605.6550  | 6056.6821   | 298.6155  |          |
| -130.7157     | -119.3894   | 511540.4688 | 0.1474      | 0.1563    |          |
| [357]ENERGY:  | 780000      | 3230.5901   | 5114.4164   | 5496.4802 | 335.4343 |
| -14169.1010   | -1686.3511  | 0.0000      | 0.0000      | 7671.4698 |          |
| 5992.9387     | 299.9929    | -1678.5311  | 6055.1181   | 298.7200  |          |
| -99.3304      | -53.5613    | 511540.4688 | -1.3898     | -1.3946   |          |
| [395]ENERGY:  | 790000      | 3158.4628   | 5299.4381   | 5430.7599 | 316.8697 |
| -14236.3479   | -1688.3892  | 0.0000      | 0.0000      | 7712.5594 |          |
| 5993.3528     | 301.5998    | -1719.2067  | 6056.0208   | 298.8345  |          |
| 214.0871      | 73.7267     | 511540.4688 | 0.9678      | 0.9461    |          |
| [449]ENERGY:  | 800000      | 3048.0276   | 5135.7370   | 5525.5240 | 338.8113 |
| -14148.7100   | -1621.5955  | 0.0000      | 0.0000      | 7713.1703 |          |
| 5990.9647     | 301.6236    | -1722.2056  | 6056.4928   | 298.8690  |          |
| 361.2124      | 235.6887    | 511540.4688 | 1.3379      | 1.3543    |          |
| [487]ENERGY:  | 810000      | 3148.3092   | 5218.0582   | 5505.9913 | 324.8584 |
| -14153.0022   | -1708.5775  | 0.0000      | 0.0000      | 7665.8278 |          |
| 6001.4652     | 299.7723    | -1664.3626  | 6057.4837   | 298.7552  |          |



## Supplementary Text 6

|               |             |             |             |             |           |
|---------------|-------------|-------------|-------------|-------------|-----------|
|               | 24.8755     | -84.1389    | 511540.4688 | 1.3439      | 1.3359    |
| [538]ENERGY:  | 820000      | 3283.3956   | 5059.2874   | 5520.7991   | 331.9711  |
|               | -14060.5760 | -1767.5295  | 0.0000      | 0.0000      | 7625.8451 |
|               | 5993.1928   | 298.2088    | -1632.6523  | 6056.4956   | 298.8599  |
|               | -57.0940    | -26.9767    | 511540.4688 | -1.7212     | -1.7222   |
| [575]ENERGY:  | 830000      | 3194.1267   | 5178.0068   | 5446.9890   | 325.9645  |
|               | -14077.2006 | -1710.8084  | 0.0000      | 0.0000      | 7638.4752 |
|               | 5995.5533   | 298.7027    | -1642.9219  | 6055.5498   | 298.7464  |
|               | -250.4178   | -172.6658   | 511540.4688 | 0.1642      | 0.2005    |
| [626]ENERGY:  | 840000      | 3119.3366   | 5326.9482   | 5490.4198   | 309.4861  |
|               | -14160.7073 | -1712.8549  | 0.0000      | 0.0000      | 7620.6463 |
|               | 5993.2749   | 298.0055    | -1627.3715  | 6055.8796   | 298.9456  |
|               | -144.0461   | -148.0715   | 511540.4688 | -1.7187     | -1.7574   |
| [663]ENERGY:  | 850000      | 3175.4798   | 5178.7180   | 5423.4485   | 322.0752  |
|               | -14038.8326 | -1718.7560  | 0.0000      | 0.0000      | 7651.7926 |
|               | 5993.9256   | 299.2235    | -1657.8670  | 6055.8081   | 298.9841  |
|               | -129.1660   | -11.0812    | 511540.4688 | 2.7433      | 2.7842    |
| [714]ENERGY:  | 860000      | 3217.1063   | 5176.7442   | 5492.1934   | 303.7678  |
|               | -14175.5415 | -1663.6608  | 0.0000      | 0.0000      | 7643.2842 |
|               | 5993.8936   | 298.8907    | -1649.3906  | 6056.0356   | 299.2231  |
|               | -26.8345    | 10.6633     | 511540.4688 | -0.7814     | -0.7886   |
| [750]ENERGY:  | 870000      | 3235.3609   | 5253.6397   | 5428.2635   | 325.6029  |
|               | -14149.5964 | -1698.9618  | 0.0000      | 0.0000      | 7600.6878 |
|               | 5994.9966   | 297.2250    | -1605.6912  | 6056.1866   | 299.1644  |
|               | -241.3918   | -251.2092   | 511540.4688 | -1.1243     | -1.1316   |
| [800]ENERGY:  | 880000      | 3256.0524   | 5189.9114   | 5475.0814   | 330.4329  |
|               | -14120.7140 | -1724.3149  | 0.0000      | 0.0000      | 7589.6983 |
|               | 5996.1474   | 296.7953    | -1593.5509  | 6056.9617   | 299.3418  |
|               | -17.1987    | -89.1222    | 511540.4688 | 1.5015      | 1.4838    |
| [836]ENERGY:  | 890000      | 3189.3874   | 5249.9633   | 5477.2788   | 301.3267  |
|               | -14100.5516 | -1699.0427  | 0.0000      | 0.0000      | 7580.2697 |
|               | 5998.6316   | 296.4266    | -1581.6380  | 6055.9997   | 299.2596  |
|               | 138.5789    | 145.4097    | 511540.4688 | -2.7253     | -2.7090   |
| [889]ENERGY:  | 900000      | 3199.2526   | 5200.7205   | 5527.2691   | 316.1408  |
|               | -14226.5085 | -1681.8363  | 0.0000      | 0.0000      | 7658.9712 |
|               | 5994.0093   | 299.5042    | -1664.9619  | 6056.3762   | 299.3049  |
|               | -116.0650   | -85.0733    | 511540.4688 | 3.7667      | 3.7854    |
| [925]ENERGY:  | 910000      | 3170.3267   | 5178.9258   | 5493.9404   | 327.8482  |
|               | -14125.0815 | -1646.6921  | 0.0000      | 0.0000      | 7597.1735 |
|               | 5996.4410   | 297.0876    | -1600.7326  | 6056.8510   | 299.1060  |
|               | 190.3628    | 21.9411     | 511540.4688 | 0.5845      | 0.5422    |
| [975]ENERGY:  | 920000      | 3190.5878   | 5199.5378   | 5491.9828   | 295.5269  |
|               | -14179.2840 | -1660.5753  | 0.0000      | 0.0000      | 7658.1762 |
|               | 5995.9523   | 299.4731    | -1662.2239  | 6056.8455   | 299.1058  |
|               | -8.4160     | -13.1341    | 511540.4688 | -3.5077     | -3.4875   |
| [1011]ENERGY: | 930000      | 3142.2966   | 5221.5418   | 5501.0759   |           |
|               | 291.4699    | -14138.3749 | -1702.1865  | 0.0000      | 0.0000    |
|               | 7678.9775   | 5994.8004   | 300.2865    | -1684.1771  | 6057.9988 |
|               | 299.2440    | -98.6732    | -117.8735   | 511540.4688 | 2.8386    |
|               | 2.8230      |             |             |             |           |
| [1061]ENERGY: | 940000      | 3206.5629   | 5176.7234   | 5491.8602   |           |
|               | 314.1993    | -14230.1194 | -1590.3773  | 0.0000      | 0.0000    |
|               | 7628.3430   | 5997.1922   | 298.3065    | -1631.1508  | 6056.8235 |
|               | 299.0567    | 294.0727    | 192.5879    | 511540.4688 | 0.0522    |

Supplementary Text 6

0.0443  
 [1097]ENERGY: 950000 3173.5836 5178.2456 5490.1169  
 335.9457 -14156.5473 -1683.3870 0.0000 0.0000  
 7654.5370 5992.4945 299.3308 -1662.0425 6055.5883  
 299.1291 119.0863 133.5968 511540.4688 1.1990  
 1.2292  
 [1147]ENERGY: 960000 3114.6129 5120.6527 5513.5546  
 301.5498 -14033.2200 -1689.7148 0.0000 0.0000  
 7665.9756 5993.4109 299.7781 -1672.5647 6055.5359  
 299.0726 38.4540 66.4380 511540.4688 2.3172  
 2.3209  
 [1183]ENERGY: 970000 3179.4548 5242.4013 5487.4061  
 319.2903 -14174.6919 -1741.7611 0.0000 0.0000  
 7683.0393 5995.1389 300.4454 -1687.9005 6056.0704  
 299.0150 -126.5395 -184.9954 511540.4688 1.0868  
 1.0711  
 [1233]ENERGY: 980000 3199.8026 5136.1107 5461.2766  
 312.9185 -14141.0034 -1625.4811 0.0000 0.0000  
 7650.4234 5994.0474 299.1699 -1656.3760 6055.8676  
 299.0049 164.2714 85.6511 511540.4688 -0.5558  
 -0.5612  
 [1269]ENERGY: 990000 3220.6008 5239.7783 5446.7169  
 330.1018 -14233.7689 -1678.2108 0.0000 0.0000  
 7667.6532 5992.8713 299.8437 -1674.7819 6056.0383  
 299.4782 60.4684 80.3062 511540.4688 -1.8808  
 -1.8813  
 [1322]ENERGY: 1000000 3126.4032 5213.9271 5456.4955  
 317.0790 -14122.4047 -1669.0260 0.0000 0.0000  
 7671.4461 5993.9202 299.9920 -1677.5260 6056.8849  
 299.5114 -45.0164 -67.4676 511540.4688 -1.6660  
 -1.6738  
 [1358]ENERGY: 1010000 3189.9665 5186.6858 5487.8501  
 324.7463 -14185.3643 -1603.7844 0.0000 0.0000  
 7594.6316 5994.7315 296.9882 -1599.9001 6055.7495  
 299.6354 70.3534 -41.4593 511540.4688 -13.9550  
 -13.9482  
 [1408]ENERGY: 1020000 3177.0235 5153.4447 5481.6129  
 316.5996 -14102.6109 -1710.6425 0.0000 0.0000  
 7678.3184 5993.7456 300.2608 -1684.5727 6056.3583  
 300.0143 -190.7220 -226.2630 511540.4688 -22.1472  
 -22.1376  
 [1444]ENERGY: 1030000 3239.0269 5088.4119 5473.6677  
 331.9881 -14184.2589 -1691.6564 0.0000 0.0000  
 7735.5869 5992.7662 302.5002 -1742.8207 6056.3992  
 300.2631 66.0232 -52.1891 511540.4688 -24.3887  
 -24.3996  
 [1494]ENERGY: 1040000 3094.0823 5250.6395 5450.0159  
 318.1249 -14220.9764 -1612.6208 0.0000 0.0000  
 7712.1203 5991.3857 301.5826 -1720.7346 6056.7263  
 300.4083 169.5541 154.2758 511540.4688 -21.9800  
 -21.9517  
 [1530]ENERGY: 1050000 3234.7339 5283.3431 5388.1613  
 320.3056 -14242.0927 -1639.3300 0.0000 0.0000  
 7647.6195 5992.7408 299.0603 -1654.8787 6055.6975

Supplementary Text 6

|                       |             |            |             |           |
|-----------------------|-------------|------------|-------------|-----------|
| 300.3406              | 124.1266    | 90.2139    | 511540.4688 | -24.5584  |
| -24.5662              |             |            |             |           |
| [1580]ENERGY: 1060000 | 3234.9128   | 5101.3625  | 5472.9714   |           |
| 311.7782              | -14165.2726 | -1709.7531 | 0.0000      | 0.0000    |
| 7744.4349             | 5990.4341   | 302.8462   | -1754.0008  | 6056.4676 |
| 300.5224              | 90.1953     | 80.3949    | 511540.4688 | -17.1418  |
| -17.1318              |             |            |             |           |
| [1616]ENERGY: 1070000 | 3242.9074   | 5250.1353  | 5472.8057   |           |
| 331.8446              | -14192.4092 | -1709.6361 | 0.0000      | 0.0000    |
| 7599.4782             | 5995.1260   | 297.1777   | -1604.3522  | 6057.1955 |
| 300.6387              | -84.9079    | 15.8433    | 511540.4688 | -21.3446  |
| -21.3614              |             |            |             |           |
| [1666]ENERGY: 1080000 | 3208.8623   | 5281.2133  | 5429.7572   |           |
| 319.3899              | -14237.0567 | -1734.5979 | 0.0000      | 0.0000    |
| 7726.3465             | 5993.9147   | 302.1389   | -1732.4319  | 6057.5518 |
| 300.8772              | 14.9907     | 43.3483    | 511540.4688 | -16.1087  |
| -16.1099              |             |            |             |           |
| [1702]ENERGY: 1090000 | 3167.9812   | 5266.6048  | 5472.9827   |           |
| 307.6174              | -14231.5105 | -1677.9617 | 0.0000      | 0.0000    |
| 7690.8671             | 5996.5809   | 300.7515   | -1694.2862  | 6057.7454 |
| 300.8915              | -8.0459     | -42.1898   | 511540.4688 | -17.8384  |
| -17.8369              |             |            |             |           |
| [1755]ENERGY: 1100000 | 3155.9341   | 5245.0937  | 5414.0877   |           |
| 325.2440              | -14166.3543 | -1698.1197 | 0.0000      | 0.0000    |
| 7718.6967             | 5994.5822   | 301.8398   | -1724.1145  | 6056.7682 |
| 300.9507              | 91.3333     | 133.0140   | 511540.4688 | -17.1765  |
| -17.1745              |             |            |             |           |
| [1791]ENERGY: 1110000 | 3203.3522   | 5187.3741  | 5445.7953   |           |
| 330.5336              | -14195.3518 | -1678.5657 | 0.0000      | 0.0000    |
| 7702.6800             | 5995.8177   | 301.2134   | -1706.8624  | 6057.1549 |
| 300.9881              | -21.3634    | -67.6729   | 511540.4688 | -19.5560  |
| -19.5506              |             |            |             |           |
| [1841]ENERGY: 1120000 | 3146.6842   | 5301.3076  | 5467.1988   |           |
| 327.8612              | -14246.5520 | -1693.6184 | 0.0000      | 0.0000    |
| 7691.3611             | 5994.2424   | 300.7708   | -1697.1186  | 6057.2959 |
| 300.9209              | 184.5880    | 43.4034    | 511540.4688 | -23.3504  |
| -23.3784              |             |            |             |           |
| [1877]ENERGY: 1130000 | 3178.4929   | 5235.2227  | 5478.4612   |           |
| 325.0295              | -14347.6254 | -1668.2820 | 0.0000      | 0.0000    |
| 7790.4033             | 5991.7022   | 304.6438   | -1798.7010  | 6056.4861 |
| 300.8712              | 23.4275     | 65.0725    | 511540.4688 | -17.9434  |
| -17.9215              |             |            |             |           |
| [1927]ENERGY: 1140000 | 3193.2684   | 5253.8529  | 5492.7235   |           |
| 322.7969              | -14245.7753 | -1689.6436 | 0.0000      | 0.0000    |
| 7667.7636             | 5994.9864   | 299.8480   | -1672.7771  | 6056.9106 |
| 300.9092              | 219.0596    | 108.2001   | 511540.4688 | -21.7608  |
| -21.7703              |             |            |             |           |
| [1963]ENERGY: 1150000 | 3227.4783   | 5214.1432  | 5482.1403   |           |
| 302.8554              | -14086.5917 | -1798.6533 | 0.0000      | 0.0000    |
| 7653.1306             | 5994.5028   | 299.2758   | -1658.6278  | 6056.7648 |
| 300.9477              | -168.0160   | -227.4965  | 511540.4688 | -17.8468  |
| -17.8499              |             |            |             |           |
| [2013]ENERGY: 1160000 | 3228.3403   | 5256.7215  | 5424.6529   |           |
| 317.2166              | -14130.8753 | -1735.6225 | 0.0000      | 0.0000    |

Supplementary Text 6

|                       |             |            |             |           |
|-----------------------|-------------|------------|-------------|-----------|
| 7633.8634             | 5994.2969   | 298.5223   | -1639.5665  | 6056.4079 |
| 301.0767              | 32.7468     | -45.3241   | 511540.4688 | -20.6259  |
| -20.6119              |             |            |             |           |
| [2049]ENERGY: 1170000 | 3212.1243   | 5215.3513  | 5410.3641   |           |
| 313.0006              | -14158.8215 | -1720.7485 | 0.0000      | 0.0000    |
| 7724.0332             | 5995.3036   | 302.0484   | -1728.7297  | 6058.5658 |
| 301.0302              | -117.2274   | -169.2773  | 511540.4688 | -22.1560  |
| -22.1482              |             |            |             |           |
| [2099]ENERGY: 1180000 | 3180.0582   | 5237.4276  | 5476.7069   |           |
| 336.9315              | -14225.2846 | -1727.8025 | 0.0000      | 0.0000    |
| 7718.7155             | 5996.7526   | 301.8405   | -1721.9629  | 6059.0256 |
| 301.0011              | 40.3021     | 32.9924    | 511540.4688 | -15.4808  |
| -15.4912              |             |            |             |           |
| [2135]ENERGY: 1190000 | 3161.6422   | 5207.8344  | 5470.0237   |           |
| 339.9636              | -14167.6821 | -1752.8935 | 0.0000      | 0.0000    |
| 7733.8552             | 5992.7434   | 302.4325   | -1741.1118  | 6057.3041 |
| 301.1656              | 126.0927    | 116.9674   | 511540.4688 | -18.6136  |
| -18.6061              |             |            |             |           |
| [2188]ENERGY: 1200000 | 3171.1238   | 5226.0128  | 5425.1215   |           |
| 316.7777              | -14175.0702 | -1734.7085 | 0.0000      | 0.0000    |
| 7765.5842             | 5994.8414   | 303.6733   | -1770.7428  | 6058.0598 |
| 301.2003              | -58.2011    | 2.9238     | 511540.4688 | -13.3629  |
| -13.3549              |             |            |             |           |
| [2224]ENERGY: 1210000 | 3229.9569   | 5208.0383  | 5466.4541   |           |
| 304.8867              | -14204.9286 | -1704.3929 | 0.0000      | 0.0000    |
| 7697.9092             | 5997.9236   | 301.0269   | -1699.9856  | 6057.7422 |
| 301.0936              | -48.4060    | -112.6910  | 511540.4688 | -20.6860  |
| -20.6978              |             |            |             |           |
| [2274]ENERGY: 1220000 | 3210.5375   | 5327.0689  | 5451.3401   |           |
| 313.2199              | -14221.8024 | -1754.2257 | 0.0000      | 0.0000    |
| 7672.2636             | 5998.4019   | 300.0240   | -1673.8617  | 6059.2551 |
| 301.4352              | 169.5717    | 63.6241    | 511540.4688 | -21.0970  |
| -21.0868              |             |            |             |           |
| [2310]ENERGY: 1230000 | 3123.1477   | 5283.7729  | 5442.6387   |           |
| 316.6112              | -14260.7071 | -1644.9938 | 0.0000      | 0.0000    |
| 7735.6113             | 5996.0810   | 302.5012   | -1739.5304  | 6059.2486 |
| 301.0796              | 60.2581     | 93.3988    | 511540.4688 | -20.7919  |
| -20.7990              |             |            |             |           |
| [2360]ENERGY: 1240000 | 3182.4578   | 5181.5907  | 5441.6622   |           |
| 334.0246              | -14153.8347 | -1768.6170 | 0.0000      | 0.0000    |
| 7776.2424             | 5993.5260   | 304.0901   | -1782.7165  | 6058.8163 |
| 301.0385              | -139.8188   | -156.4869  | 511540.4688 | -15.1005  |
| -15.1338              |             |            |             |           |
| [2396]ENERGY: 1250000 | 3241.3007   | 5285.5492  | 5401.4571   |           |
| 334.9859              | -14183.9989 | -1733.5134 | 0.0000      | 0.0000    |
| 7650.7086             | 5996.4892   | 299.1811   | -1654.2195  | 6059.1540 |
| 300.8533              | -191.9290   | -61.7403   | 511540.4688 | -22.3564  |
| -22.3346              |             |            |             |           |
| [2446]ENERGY: 1260000 | 3230.0261   | 5308.2249  | 5406.5372   |           |
| 323.5975              | -14119.5805 | -1761.5400 | 0.0000      | 0.0000    |
| 7611.4068             | 5998.6720   | 297.6442   | -1612.7348  | 6059.5390 |
| 300.9707              | -88.6444    | -193.3539  | 511540.4688 | -20.5162  |
| -20.5072              |             |            |             |           |
| [2482]ENERGY: 1270000 | 3222.8359   | 5188.5512  | 5429.6254   |           |

## Supplementary Text 6

|                       |             |            |             |           |
|-----------------------|-------------|------------|-------------|-----------|
| 342.0445              | -14145.9046 | -1725.7677 | 0.0000      | 0.0000    |
| 7685.8618             | 5997.2466   | 300.5557   | -1688.6152  | 6059.1807 |
| 301.1162              | -118.7129   | -119.5480  | 511540.4688 | -18.6080  |
| -18.6182              |             |            |             |           |
| [2532]ENERGY: 1280000 | 3165.2620   | 5291.8903  | 5419.6654   |           |
| 311.6633              | -14160.6473 | -1696.9966 | 0.0000      | 0.0000    |
| 7666.5204             | 5997.3574   | 299.7994   | -1669.1630  | 6059.1447 |
| 301.2947              | 49.1566     | -60.9685   | 511540.4688 | -19.3938  |
| -19.3966              |             |            |             |           |
| [2568]ENERGY: 1290000 | 3168.0594   | 5268.8406  | 5475.4270   |           |
| 305.7762              | -14252.4435 | -1708.2124 | 0.0000      | 0.0000    |
| 7739.0740             | 5996.5213   | 302.6366   | -1742.5527  | 6059.7027 |
| 301.5177              | 179.5985    | 122.9271   | 511540.4688 | -19.8975  |
| -19.8937              |             |            |             |           |
| [2621]ENERGY: 1300000 | 3145.8645   | 5290.1714  | 5450.8904   |           |
| 340.5416              | -14207.8486 | -1759.4638 | 0.0000      | 0.0000    |
| 7738.3247             | 5998.4802   | 302.6073   | -1739.8445  | 6059.7489 |
| 301.6030              | -11.7838    | 39.7472    | 511540.4688 | -18.6090  |
| -18.5872              |             |            |             |           |
| [2657]ENERGY: 1310000 | 3199.4147   | 5296.1935  | 5392.8237   |           |
| 285.6905              | -14196.2015 | -1727.8250 | 0.0000      | 0.0000    |
| 7746.5441             | 5996.6399   | 302.9287   | -1749.9042  | 6059.7154 |
| 301.7849              | 33.7667     | 56.4955    | 511540.4688 | -22.5925  |
| -22.6044              |             |            |             |           |
| [2707]ENERGY: 1320000 | 3187.0527   | 5188.7000  | 5463.5639   |           |
| 317.1958              | -14148.1673 | -1766.8796 | 0.0000      | 0.0000    |
| 7756.9030             | 5998.3684   | 303.3338   | -1758.5346  | 6060.9116 |
| 301.6389              | 25.9170     | -118.8963  | 511540.4688 | -18.3987  |
| -18.4216              |             |            |             |           |
| [2743]ENERGY: 1330000 | 3145.8990   | 5198.9092  | 5454.9976   |           |
| 326.3551              | -14122.1382 | -1691.9829 | 0.0000      | 0.0000    |
| 7690.3969             | 6002.4366   | 300.7331   | -1687.9602  | 6060.9627 |
| 301.6087              | 55.1839     | -41.2265   | 511540.4688 | -19.6823  |
| -19.6601              |             |            |             |           |
| [2793]ENERGY: 1340000 | 3248.7882   | 5172.7614  | 5467.4396   |           |
| 313.3783              | -14238.6302 | -1692.4065 | 0.0000      | 0.0000    |
| 7729.1993             | 6000.5302   | 302.2505   | -1728.6691  | 6060.9231 |
| 301.5517              | 44.6521     | -57.5257   | 511540.4688 | -19.6325  |
| -19.6601              |             |            |             |           |
| [2829]ENERGY: 1350000 | 3133.0838   | 5160.4954  | 5488.0559   |           |
| 345.3815              | -14160.2191 | -1750.8875 | 0.0000      | 0.0000    |
| 7781.4673             | 5997.3774   | 304.2944   | -1784.0899  | 6060.8158 |
| 301.7496              | -38.0125    | -142.9660  | 511540.4688 | -18.0794  |
| -18.0788              |             |            |             |           |
| [2879]ENERGY: 1360000 | 3176.6978   | 5268.1444  | 5504.3910   |           |
| 333.5971              | -14294.9076 | -1743.0218 | 0.0000      | 0.0000    |
| 7754.2261             | 5999.1270   | 303.2291   | -1755.0991  | 6061.3779 |
| 301.5195              | -227.7315   | -186.2794  | 511540.4688 | -19.1566  |
| -19.1457              |             |            |             |           |
| [2915]ENERGY: 1370000 | 3214.2892   | 5259.6977  | 5533.4330   |           |
| 327.1848              | -14230.8175 | -1749.5258 | 0.0000      | 0.0000    |
| 7646.5401             | 6000.8014   | 299.0181   | -1645.7387  | 6061.6933 |
| 301.8465              | -82.6403    | -22.8277   | 511540.4688 | -21.7612  |
| -21.7616              |             |            |             |           |

## Supplementary Text 6

|                       |             |            |             |           |
|-----------------------|-------------|------------|-------------|-----------|
| [2965]ENERGY: 1380000 | 3169.1999   | 5179.6933  | 5453.4137   |           |
| 328.9201              | -14161.0144 | -1689.8629 | 0.0000      | 0.0000    |
| 7720.0287             | 6000.3784   | 301.8918   | -1719.6503  | 6062.0924 |
| 301.9045              | 342.0122    | 140.8653   | 511540.4688 | -17.9161  |
| -17.8906              |             |            |             |           |
| [3001]ENERGY: 1390000 | 3186.9244   | 5258.4443  | 5489.1194   |           |
| 328.3660              | -14193.7729 | -1765.7960 | 0.0000      | 0.0000    |
| 7698.2615             | 6001.5467   | 301.0406   | -1696.7147  | 6062.3614 |
| 302.0048              | -49.3211    | -87.6556   | 511540.4688 | -15.7055  |
| -15.7141              |             |            |             |           |
| [3054]ENERGY: 1400000 | 3178.0767   | 5172.9347  | 5478.1562   |           |
| 312.3265              | -14186.7216 | -1739.9153 | 0.0000      | 0.0000    |
| 7782.7652             | 5997.6222   | 304.3452   | -1785.1429  | 6061.6637 |
| 301.8370              | -48.7386    | -71.8452   | 511540.4688 | -18.6184  |
| -18.6141              |             |            |             |           |
| [3090]ENERGY: 1410000 | 3218.8771   | 5271.5913  | 5475.4721   |           |
| 331.5664              | -14256.6581 | -1731.8973 | 0.0000      | 0.0000    |
| 7689.5221             | 5998.4735   | 300.6989   | -1691.0485  | 6062.8265 |
| 301.7862              | 184.9249    | 186.2453   | 511540.4688 | -19.4179  |
| -19.4232              |             |            |             |           |
| [3140]ENERGY: 1420000 | 3169.7066   | 5245.7656  | 5492.5428   |           |
| 317.9903              | -14235.1984 | -1745.7611 | 0.0000      | 0.0000    |
| 7753.4692             | 5998.5150   | 303.1995   | -1754.9542  | 6062.2923 |
| 302.0134              | 114.3326    | 94.3088    | 511540.4688 | -19.0676  |
| -19.0625              |             |            |             |           |
| [3176]ENERGY: 1430000 | 3286.1234   | 5217.5812  | 5447.2554   |           |
| 298.6632              | -14187.6499 | -1716.9327 | 0.0000      | 0.0000    |
| 7658.8544             | 6003.8951   | 299.4996   | -1654.9594  | 6063.4962 |
| 302.3807              | -144.2542   | -103.9839  | 511540.4688 | -15.2819  |
| -15.2752              |             |            |             |           |
| [3226]ENERGY: 1440000 | 3204.9738   | 5283.4691  | 5418.8970   |           |
| 311.4633              | -14282.0582 | -1723.7535 | 0.0000      | 0.0000    |
| 7783.5419             | 5996.5336   | 304.3755   | -1787.0084  | 6062.0497 |
| 302.2054              | -111.2351   | -216.3763  | 511540.4688 | -15.2343  |
| -15.2687              |             |            |             |           |
| [3262]ENERGY: 1450000 | 3192.9843   | 5235.5162  | 5479.0917   |           |
| 339.3556              | -14309.9481 | -1709.6388 | 0.0000      | 0.0000    |
| 7769.4190             | 5996.7800   | 303.8233   | -1772.6391  | 6062.8577 |
| 302.2408              | 73.9539     | 38.1596    | 511540.4688 | -17.8097  |
| -17.7797              |             |            |             |           |
| [3312]ENERGY: 1460000 | 3184.9824   | 5278.9695  | 5462.0073   |           |
| 298.0215              | -14259.3336 | -1713.6453 | 0.0000      | 0.0000    |
| 7748.2319             | 5999.2338   | 302.9947   | -1748.9982  | 6062.8704 |
| 302.3137              | 74.2403     | -0.3250    | 511540.4688 | -15.4270  |
| -15.4389              |             |            |             |           |
| [3348]ENERGY: 1470000 | 3158.7964   | 5179.3714  | 5394.5606   |           |
| 341.2657              | -14175.0564 | -1652.0236 | 0.0000      | 0.0000    |
| 7753.6582             | 6000.5723   | 303.2069   | -1753.0859  | 6063.7231 |
| 302.3583              | 110.0120    | 102.8663   | 511540.4688 | -13.4737  |
| -13.4723              |             |            |             |           |
| [3398]ENERGY: 1480000 | 3158.9216   | 5256.6541  | 5460.9298   |           |
| 335.4608              | -14237.7075 | -1791.3425 | 0.0000      | 0.0000    |
| 7816.8606             | 5999.7770   | 305.6785   | -1817.0836  | 6064.5013 |
| 302.3581              | 230.6349    | 189.9663   | 511540.4688 | -16.0026  |

Supplementary Text 6

-16.0083  
 [3434]ENERGY: 1490000      3192.6154      5189.6918      5504.1858  
 343.9495      -14182.7512      -1757.9196      0.0000      0.0000  
 7713.5083      6003.2800      301.6369      -1710.2283      6064.7937  
 302.3879      175.4558      103.1537      511540.4688      -11.5513  
 -11.5460  
 [3487]ENERGY: 1500000      3170.9388      5283.9234      5535.1435  
 328.0882      -14364.5466      -1649.3549      0.0000      0.0000  
 7697.4746      6001.6671      301.0099      -1695.8075      6063.8382  
 302.3630      186.1410      129.5556      511540.4688      -19.1438  
 -19.1531  
 [3523]ENERGY: 1510000      3181.2024      5234.1482      5441.6958  
 327.7818      -14125.8972      -1748.6341      0.0000      0.0000  
 7695.0992      6005.3962      300.9170      -1689.7030      6064.4884  
 302.4755      -190.0188      -238.5069      511540.4688      -14.9895  
 -14.9875  
 [3573]ENERGY: 1520000      3167.8562      5234.9748      5455.5481  
 316.4882      -14153.9242      -1778.4284      0.0000      0.0000  
 7759.5409      6002.0556      303.4370      -1757.4853      6065.3530  
 302.3808      55.4619      -10.8067      511540.4688      -20.0963  
 -20.0904  
 [3609]ENERGY: 1530000      3157.1267      5264.3942      5498.9472  
 329.6770      -14224.7162      -1730.6641      0.0000      0.0000  
 7707.4202      6002.1851      301.3988      -1705.2351      6064.5204  
 302.4179      -89.8582      -72.6176      511540.4688      -15.0560  
 -15.0456  
 [3659]ENERGY: 1540000      3264.9597      5220.5762      5386.4567  
 289.2069      -14281.7904      -1690.3124      0.0000      0.0000  
 7810.9426      6000.0393      305.4470      -1810.9033      6064.4385  
 302.6226      -100.4378      -131.3864      511540.4688      -18.0321  
 -18.0399  
 [3695]ENERGY: 1550000      3176.6767      5408.7912      5399.8044  
 350.3595      -14310.1622      -1751.0437      0.0000      0.0000  
 7727.1085      6001.5345      302.1687      -1725.5740      6065.1296  
 302.6854      85.4154      77.7487      511540.4688      -15.3991  
 -15.3991  
 [3745]ENERGY: 1560000      3171.2097      5187.9371      5442.7199  
 317.6722      -14212.2879      -1675.2519      0.0000      0.0000  
 7767.4573      5999.4564      303.7465      -1768.0009      6064.0976  
 302.6852      -103.3125      -89.4814      511540.4688      -15.2626  
 -15.2574  
 [3781]ENERGY: 1570000      3229.4720      5179.9322      5448.4045  
 329.0770      -14284.7687      -1660.1519      0.0000      0.0000  
 7761.3224      6003.2876      303.5066      -1758.0348      6064.5451  
 302.7120      -52.3412      -89.3881      511540.4688      -10.8233  
 -10.8527  
 [3831]ENERGY: 1580000      3249.3363      5304.5571      5409.6323  
 315.7612      -14281.8996      -1714.0834      0.0000      0.0000  
 7717.2052      6000.5090      301.7814      -1716.6962      6065.2285  
 302.6564      11.4409      -22.3457      511540.4688      -16.7998  
 -16.7868  
 [3867]ENERGY: 1590000      3198.6193      5232.8819      5448.7304  
 308.6357      -14183.5149      -1733.8942      0.0000      0.0000  
 7734.5479      6006.0061      302.4596      -1728.5418      6065.9237

Supplementary Text 6

|                       |             |            |             |           |
|-----------------------|-------------|------------|-------------|-----------|
| 302.7550              | -37.8617    | -80.5851   | 511540.4688 | -15.4411  |
| -15.4264              |             |            |             |           |
| [3920]ENERGY: 1600000 | 3232.6908   | 5306.1044  | 5440.7020   |           |
| 329.6147              | -14328.7870 | -1715.4706 | 0.0000      | 0.0000    |
| 7734.4612             | 5999.3155   | 302.4562   | -1735.1457  | 6065.7971 |
| 302.8107              | -65.8157    | -169.0732  | 511540.4688 | -17.7822  |
| -17.8172              |             |            |             |           |
| [3956]ENERGY: 1610000 | 3211.5615   | 5262.4320  | 5437.2413   |           |
| 312.9369              | -14290.0950 | -1688.5646 | 0.0000      | 0.0000    |
| 7755.8547             | 6001.3667   | 303.2928   | -1754.4880  | 6065.1433 |
| 302.7055              | 16.5010     | 47.6742    | 511540.4688 | -18.1920  |
| -18.1659              |             |            |             |           |
| [4006]ENERGY: 1620000 | 3216.9845   | 5224.9938  | 5446.4733   |           |
| 329.9935              | -14266.8412 | -1714.2032 | 0.0000      | 0.0000    |
| 7763.7074             | 6001.1080   | 303.5999   | -1762.5994  | 6066.6108 |
| 302.8131              | -86.6507    | -122.3680  | 511540.4688 | -17.4766  |
| -17.4690              |             |            |             |           |
| [4042]ENERGY: 1630000 | 3198.6050   | 5319.1739  | 5470.8484   |           |
| 347.3414              | -14341.2930 | -1744.8587 | 0.0000      | 0.0000    |
| 7751.9733             | 6001.7903   | 303.1410   | -1750.1830  | 6065.1224 |
| 302.7580              | -349.4644   | -242.6611  | 511540.4688 | -19.9121  |
| -19.9037              |             |            |             |           |
| [4092]ENERGY: 1640000 | 3183.8503   | 5243.1686  | 5450.8566   |           |
| 317.2717              | -14265.3570 | -1686.5914 | 0.0000      | 0.0000    |
| 7761.1019             | 6004.3006   | 303.4980   | -1756.8012  | 6065.3983 |
| 302.6182              | -32.6688    | -26.8587   | 511540.4688 | -19.9750  |
| -19.9730              |             |            |             |           |
| [4128]ENERGY: 1650000 | 3143.1103   | 5313.0303  | 5491.8471   |           |
| 329.9997              | -14353.8000 | -1668.0802 | 0.0000      | 0.0000    |
| 7746.4422             | 6002.5494   | 302.9247   | -1743.8928  | 6066.1737 |
| 302.5834              | 40.1110     | 180.3064   | 511540.4688 | -20.0224  |
| -20.0364              |             |            |             |           |
| [4178]ENERGY: 1660000 | 3210.1352   | 5202.8231  | 5436.3366   |           |
| 318.9019              | -14195.4342 | -1741.9884 | 0.0000      | 0.0000    |
| 7772.8611             | 6003.6352   | 303.9579   | -1769.2259  | 6066.2759 |
| 302.7262              | 111.0839    | 106.1174   | 511540.4688 | -20.3044  |
| -20.3093              |             |            |             |           |
| [4214]ENERGY: 1670000 | 3154.1608   | 5149.1437  | 5498.4309   |           |
| 306.6975              | -14183.2374 | -1712.2768 | 0.0000      | 0.0000    |
| 7789.2790             | 6002.1978   | 304.5999   | -1787.0813  | 6066.3733 |
| 302.6555              | 9.6220      | -20.2765   | 511540.4688 | -16.1217  |
| -16.1076              |             |            |             |           |
| [4264]ENERGY: 1680000 | 3222.8452   | 5330.7091  | 5425.5102   |           |
| 323.9160              | -14304.9328 | -1713.4221 | 0.0000      | 0.0000    |
| 7719.2990             | 6003.9247   | 301.8633   | -1715.3744  | 6066.3079 |
| 302.5937              | -192.0688   | -119.1749  | 511540.4688 | -20.6474  |
| -20.6632              |             |            |             |           |
| [4300]ENERGY: 1690000 | 3169.1607   | 5255.7458  | 5437.2820   |           |
| 314.7984              | -14289.7066 | -1711.1329 | 0.0000      | 0.0000    |
| 7828.0474             | 6004.1948   | 306.1159   | -1823.8526  | 6066.5311 |
| 303.1410              | 90.6348     | 33.3767    | 511540.4688 | -17.3828  |
| -17.3748              |             |            |             |           |
| [4353]ENERGY: 1700000 | 3221.8950   | 5305.0468  | 5494.9442   |           |
| 301.1932              | -14298.6706 | -1687.4857 | 0.0000      | 0.0000    |



## Supplementary Text 6

|                       |             |            |             |           |
|-----------------------|-------------|------------|-------------|-----------|
| 7669.1792             | 6006.1020   | 299.9034   | -1663.0772  | 6067.7341 |
| 303.0179              | 172.3648    | 27.7006    | 511540.4688 | -16.7322  |
| -16.7279              |             |            |             |           |
| [4389]ENERGY: 1710000 | 3206.3515   | 5237.7934  | 5458.8998   |           |
| 317.8020              | -14291.5748 | -1678.7239 | 0.0000      | 0.0000    |
| 7752.7349             | 6003.2829   | 303.1708   | -1749.4520  | 6068.0578 |
| 302.9540              | 124.7153    | 69.4049    | 511540.4688 | -23.1473  |
| -23.1624              |             |            |             |           |
| [4439]ENERGY: 1720000 | 3249.9979   | 5246.8673  | 5477.2256   |           |
| 350.0167              | -14279.8293 | -1737.0487 | 0.0000      | 0.0000    |
| 7697.7136             | 6004.9430   | 301.0192   | -1692.7706  | 6067.8314 |
| 302.8739              | 33.2499     | -32.9574   | 511540.4688 | -19.5329  |
| -19.5257              |             |            |             |           |
| [4475]ENERGY: 1730000 | 3241.9915   | 5267.8291  | 5435.4856   |           |
| 310.7640              | -14310.1653 | -1752.7853 | 0.0000      | 0.0000    |
| 7810.4858             | 6003.6055   | 305.4292   | -1806.8804  | 6068.3456 |
| 302.7757              | 127.4045    | 125.3885   | 511540.4688 | -19.2169  |
| -19.2261              |             |            |             |           |
| [4525]ENERGY: 1740000 | 3259.5556   | 5257.0136  | 5452.2198   |           |
| 322.3784              | -14211.7206 | -1784.1592 | 0.0000      | 0.0000    |
| 7714.3878             | 6009.6754   | 301.6713   | -1704.7125  | 6068.6105 |
| 302.9594              | -65.4003    | -179.6029  | 511540.4688 | -10.5387  |
| -10.5387              |             |            |             |           |
| [4561]ENERGY: 1750000 | 3228.5764   | 5314.5844  | 5467.2120   |           |
| 299.1813              | -14290.8242 | -1759.5856 | 0.0000      | 0.0000    |
| 7745.9063             | 6005.0507   | 302.9038   | -1740.8556  | 6068.6449 |
| 303.0832              | -200.0629   | -83.6747   | 511540.4688 | -17.8792  |
| -17.8500              |             |            |             |           |
| [4611]ENERGY: 1760000 | 3176.1560   | 5259.3865  | 5483.6223   |           |
| 310.2715              | -14291.9612 | -1695.6476 | 0.0000      | 0.0000    |
| 7760.8177             | 6002.6452   | 303.4869   | -1758.1725  | 6068.8223 |
| 303.0379              | -107.5377   | 42.5433    | 511540.4688 | -17.2647  |
| -17.2802              |             |            |             |           |
| [4647]ENERGY: 1770000 | 3254.0398   | 5252.5002  | 5453.5280   |           |
| 309.9540              | -14256.7058 | -1773.2674 | 0.0000      | 0.0000    |
| 7766.4507             | 6006.4995   | 303.7072   | -1759.9512  | 6068.3805 |
| 303.0574              | -291.4431   | -198.9290  | 511540.4688 | -16.8898  |
| -16.8904              |             |            |             |           |
| [4697]ENERGY: 1780000 | 3245.0748   | 5359.4270  | 5450.2823   |           |
| 289.9055              | -14286.6263 | -1758.9003 | 0.0000      | 0.0000    |
| 7707.0619             | 6006.2248   | 301.3848   | -1700.8371  | 6068.6963 |
| 303.0241              | -113.3431   | -200.9240  | 511540.4688 | -12.7551  |
| -12.7624              |             |            |             |           |
| [4733]ENERGY: 1790000 | 3218.3055   | 5338.1001  | 5514.2522   |           |
| 334.3759              | -14319.1316 | -1744.5209 | 0.0000      | 0.0000    |
| 7665.2969             | 6006.6781   | 299.7516   | -1658.6188  | 6068.9276 |
| 302.8060              | -53.1075    | -68.0302   | 511540.4688 | -20.5275  |
| -20.5152              |             |            |             |           |
| [4786]ENERGY: 1800000 | 3213.6494   | 5338.6080  | 5461.1651   |           |
| 327.0389              | -14234.9557 | -1759.7581 | 0.0000      | 0.0000    |
| 7661.6002             | 6007.3476   | 299.6070   | -1654.2526  | 6068.8383 |
| 303.0744              | 1.6174      | -3.0749    | 511540.4688 | -17.0409  |
| -17.0496              |             |            |             |           |
| [4822]ENERGY: 1810000 | 3249.6578   | 5339.5479  | 5387.0194   |           |

## Supplementary Text 6

|                       |             |            |             |           |
|-----------------------|-------------|------------|-------------|-----------|
| 337.1313              | -14250.5694 | -1744.5808 | 0.0000      | 0.0000    |
| 7686.1040             | 6004.3102   | 300.5652   | -1681.7938  | 6068.3094 |
| 303.1607              | -21.5374    | 57.4155    | 511540.4688 | -17.5042  |
| -17.5013              |             |            |             |           |
| [4872]ENERGY: 1820000 | 3168.6557   | 5301.8832  | 5481.9554   |           |
| 331.9036              | -14345.7550 | -1679.8112 | 0.0000      | 0.0000    |
| 7745.4572             | 6004.2889   | 302.8862   | -1741.1683  | 6068.8596 |
| 303.1053              | 56.4113     | 89.6534    | 511540.4688 | -14.6055  |
| -14.5917              |             |            |             |           |
| [4908]ENERGY: 1830000 | 3211.3651   | 5164.5291  | 5484.0301   |           |
| 341.3767              | -14260.9911 | -1650.3304 | 0.0000      | 0.0000    |
| 7714.4578             | 6004.4373   | 301.6740   | -1710.0205  | 6068.2020 |
| 303.1735              | 219.6908    | 85.7238    | 511540.4688 | -20.6779  |
| -20.7165              |             |            |             |           |
| [4958]ENERGY: 1840000 | 3245.8585   | 5292.3643  | 5445.0350   |           |
| 344.9019              | -14378.2250 | -1661.3551 | 0.0000      | 0.0000    |
| 7719.6908             | 6008.2705   | 301.8786   | -1711.4204  | 6069.9861 |
| 303.2434              | 82.2201     | -31.8623   | 511540.4688 | -17.3619  |
| -17.3495              |             |            |             |           |
| [4994]ENERGY: 1850000 | 3285.2591   | 5288.4037  | 5463.9608   |           |
| 322.5195              | -14275.1474 | -1742.5777 | 0.0000      | 0.0000    |
| 7666.4176             | 6008.8355   | 299.7954   | -1657.5821  | 6070.0415 |
| 303.0090              | -69.8544    | -77.2973   | 511540.4688 | -17.9635  |
| -17.9543              |             |            |             |           |
| [5044]ENERGY: 1860000 | 3224.6215   | 5255.8176  | 5499.1442   |           |
| 337.4200              | -14333.8757 | -1726.3752 | 0.0000      | 0.0000    |
| 7749.6206             | 6006.3731   | 303.0490   | -1743.2475  | 6070.1218 |
| 302.9108              | -14.6097    | 58.6739    | 511540.4688 | -14.2258  |
| -14.2224              |             |            |             |           |
| [5080]ENERGY: 1870000 | 3193.7511   | 5294.6475  | 5463.1155   |           |
| 311.3713              | -14319.9662 | -1688.3368 | 0.0000      | 0.0000    |
| 7751.9134             | 6006.4957   | 303.1387   | -1745.4177  | 6070.0160 |
| 302.8664              | 132.9527    | 83.4919    | 511540.4688 | -18.9712  |
| -18.9791              |             |            |             |           |
| [5130]ENERGY: 1880000 | 3240.9375   | 5288.4977  | 5430.1209   |           |
| 324.5127              | -14227.4083 | -1731.8563 | 0.0000      | 0.0000    |
| 7684.1088             | 6008.9131   | 300.4872   | -1675.1957  | 6070.8576 |
| 302.9921              | 77.7810     | 13.0729    | 511540.4688 | -10.0694  |
| -10.0713              |             |            |             |           |
| [5166]ENERGY: 1890000 | 3210.3341   | 5293.7150  | 5417.2865   |           |
| 321.8225              | -14281.0672 | -1689.3398 | 0.0000      | 0.0000    |
| 7731.5640             | 6004.3151   | 302.3429   | -1727.2489  | 6069.4826 |
| 302.8921              | 105.6918    | 73.3600    | 511540.4688 | -16.0135  |
| -16.0176              |             |            |             |           |
| [5219]ENERGY: 1900000 | 3284.7795   | 5208.7672  | 5484.4524   |           |
| 308.5822              | -14338.7170 | -1705.9745 | 0.0000      | 0.0000    |
| 7766.3247             | 6008.2144   | 303.7022   | -1758.1102  | 6068.9927 |
| 303.1102              | -104.9822   | -68.6137   | 511540.4688 | -13.0619  |
| -13.0573              |             |            |             |           |
| [5255]ENERGY: 1910000 | 3202.4366   | 5279.3209  | 5490.6256   |           |
| 321.1363              | -14410.2659 | -1683.6074 | 0.0000      | 0.0000    |
| 7805.4125             | 6005.0587   | 305.2308   | -1800.3538  | 6069.2534 |
| 303.3282              | -147.4000   | -146.7370  | 511540.4688 | -15.5006  |
| -15.4807              |             |            |             |           |

## Supplementary Text 6

|                       |             |            |             |           |
|-----------------------|-------------|------------|-------------|-----------|
| [5305]ENERGY: 1920000 | 3315.8790   | 5230.2382  | 5492.2573   |           |
| 336.2112              | -14369.7110 | -1740.0687 | 0.0000      | 0.0000    |
| 7747.6863             | 6012.4923   | 302.9734   | -1735.1940  | 6071.7482 |
| 303.3681              | -185.4130   | -251.3752  | 511540.4688 | -12.4575  |
| -12.4816              |             |            |             |           |
| [5341]ENERGY: 1930000 | 3260.7336   | 5222.2660  | 5420.5983   |           |
| 335.1129              | -14232.0195 | -1713.4010 | 0.0000      | 0.0000    |
| 7716.2836             | 6009.5739   | 301.7454   | -1706.7097  | 6072.0118 |
| 303.1554              | -146.6659   | -144.1662  | 511540.4688 | -16.0743  |
| -16.0740              |             |            |             |           |
| [5391]ENERGY: 1940000 | 3247.3270   | 5221.3246  | 5478.7589   |           |
| 329.0850              | -14306.1715 | -1738.2482 | 0.0000      | 0.0000    |
| 7777.8402             | 6009.9160   | 304.1526   | -1767.9242  | 6072.2768 |
| 303.1563              | 133.7355    | -37.6060   | 511540.4688 | -15.5798  |
| -15.5994              |             |            |             |           |
| [5427]ENERGY: 1950000 | 3106.4312   | 5215.2113  | 5464.7207   |           |
| 331.6043              | -14183.3573 | -1666.3357 | 0.0000      | 0.0000    |
| 7738.7718             | 6007.0463   | 302.6248   | -1731.7255  | 6071.7343 |
| 302.8863              | 209.9866    | 198.0644   | 511540.4688 | -13.9548  |
| -13.9209              |             |            |             |           |
| [5477]ENERGY: 1960000 | 3215.5226   | 5229.6851  | 5455.6235   |           |
| 326.1056              | -14245.7423 | -1753.3538 | 0.0000      | 0.0000    |
| 7780.2426             | 6008.0834   | 304.2465   | -1772.1592  | 6071.1713 |
| 302.9259              | 11.7728     | -58.1578   | 511540.4688 | -16.6810  |
| -16.6864              |             |            |             |           |
| [5513]ENERGY: 1970000 | 3232.0589   | 5293.9322  | 5460.6402   |           |
| 324.0081              | -14319.0699 | -1669.2941 | 0.0000      | 0.0000    |
| 7684.7644             | 6007.0397   | 300.5128   | -1677.7246  | 6071.6129 |
| 303.2760              | 39.0516     | 54.1757    | 511540.4688 | -17.4318  |
| -17.4145              |             |            |             |           |
| [5563]ENERGY: 1980000 | 3264.6707   | 5266.4248  | 5449.2767   |           |
| 319.7704              | -14365.8994 | -1676.7145 | 0.0000      | 0.0000    |
| 7750.1085             | 6007.6372   | 303.0681   | -1742.4713  | 6070.8655 |
| 303.4641              | -98.2339    | -97.0357   | 511540.4688 | -16.0606  |
| -16.0927              |             |            |             |           |
| [5599]ENERGY: 1990000 | 3218.4221   | 5278.6344  | 5476.7859   |           |
| 330.0772              | -14363.0008 | -1685.9327 | 0.0000      | 0.0000    |
| 7757.9286             | 6012.9146   | 303.3739   | -1745.0140  | 6071.7906 |
| 303.5268              | 233.3385    | 190.6009   | 511540.4688 | -18.8924  |
| -18.8688              |             |            |             |           |
| [5652]ENERGY: 2000000 | 3241.1755   | 5329.9372  | 5472.7034   |           |
| 328.4418              | -14373.4077 | -1664.5417 | 0.0000      | 0.0000    |
| 7678.3258             | 6012.6343   | 300.2610   | -1665.6915  | 6072.0233 |
| 303.4764              | 262.9744    | 101.2648   | 511540.4688 | -12.3134  |
| -12.3153              |             |            |             |           |
| [5688]ENERGY: 2010000 | 3210.2510   | 5259.1467  | 5491.0470   |           |
| 316.6426              | -14265.7670 | -1742.8827 | 0.0000      | 0.0000    |
| 7740.8216             | 6009.2592   | 302.7049   | -1731.5625  | 6071.3049 |
| 303.4567              | -3.6657     | 22.8940    | 511540.4688 | -17.5756  |
| -17.5828              |             |            |             |           |
| [5738]ENERGY: 2020000 | 3165.0202   | 5282.9834  | 5447.6381   |           |
| 314.8446              | -14279.8026 | -1719.6856 | 0.0000      | 0.0000    |
| 7795.2740             | 6006.2721   | 304.8343   | -1789.0019  | 6070.7668 |
| 303.3204              | 60.9846     | 50.0399    | 511540.4688 | -16.4765  |

Supplementary Text 6

-16.4666  
 [5774]ENERGY: 2030000      3173.0745      5336.1473      5473.3794  
 324.6064      -14379.5639      -1649.3247      0.0000      0.0000  
 7729.0133      6007.3323      302.2432      -1721.6810      6072.0840  
 303.2465      156.7363      193.8214      511540.4688      -12.6849  
 -12.7025  
 [5824]ENERGY: 2040000      3184.1455      5324.1452      5480.7748  
 324.2663      -14293.1772      -1719.0896      0.0000      0.0000  
 7707.8672      6008.9323      301.4163      -1698.9349      6070.7582  
 303.1090      140.3170      105.7038      511540.4688      -16.7494  
 -16.7309  
 [5860]ENERGY: 2050000      3222.9019      5384.6426      5417.0345  
 325.6396      -14402.0677      -1722.3654      0.0000      0.0000  
 7779.5117      6005.2972      304.2179      -1774.2144      6072.2644  
 303.2421      -47.0158      1.6245      511540.4688      -14.2274  
 -14.2253  
 [5910]ENERGY: 2060000      3218.5270      5277.6365      5459.7397  
 322.2139      -14291.6980      -1781.9559      0.0000      0.0000  
 7806.8225      6011.2857      305.2859      -1795.5368      6072.5639  
 303.2558      96.4734      -88.6367      511540.4688      -18.0303  
 -18.0840  
 [5946]ENERGY: 2070000      3225.7495      5304.4825      5462.7248  
 324.9278      -14332.6600      -1680.9264      0.0000      0.0000  
 7709.7459      6014.0441      301.4897      -1695.7017      6073.1697  
 303.3329      -121.3599      -69.2135      511540.4688      -13.4710  
 -13.4204  
 [5996]ENERGY: 2080000      3234.9944      5311.0449      5445.3878  
 326.7102      -14344.6485      -1642.2031      0.0000      0.0000  
 7678.3116      6009.5973      300.2605      -1668.7144      6072.7885  
 303.2851      -5.1187      17.6599      511540.4688      -17.3294  
 -17.3312  
 [6032]ENERGY: 2090000      3168.3621      5349.8776      5500.9203  
 328.3365      -14366.5810      -1662.2147      0.0000      0.0000  
 7690.2222      6008.9229      300.7263      -1681.2993      6072.8008  
 303.4116      60.7070      85.6050      511540.4688      -15.7231  
 -15.7147  
 [6085]ENERGY: 2100000      3175.6009      5275.6530      5443.1627  
 334.2701      -14226.1907      -1756.0156      0.0000      0.0000  
 7763.4560      6009.9364      303.5901      -1753.5196      6074.5862  
 303.4343      53.6834      -35.9852      511540.4688      -16.0709  
 -16.0928  
 [6121]ENERGY: 2110000      3264.1027      5370.7720      5452.2478  
 340.7548      -14468.3657      -1652.9113      0.0000      0.0000  
 7705.6345      6012.2348      301.3290      -1693.3997      6074.0261  
 303.5106      -122.4595      -89.4370      511540.4688      -17.3073  
 -17.2686  
 [6171]ENERGY: 2120000      3162.1433      5247.5971      5468.5557  
 338.8517      -14270.3214      -1695.8370      0.0000      0.0000  
 7759.4161      6010.4054      303.4321      -1749.0107      6073.9241  
 303.6189      110.5848      32.2261      511540.4688      -14.2102  
 -14.2393  
 [6207]ENERGY: 2130000      3192.2841      5300.4340      5418.2415  
 318.1054      -14343.8901      -1670.9689      0.0000      0.0000  
 7795.8392      6010.0452      304.8564      -1785.7940      6074.8685

## Supplementary Text 6

|                       |             |            |             |           |
|-----------------------|-------------|------------|-------------|-----------|
| 303.5621              | 7.8815      | 5.9085     | 511540.4688 | -14.7926  |
| -14.7892              |             |            |             |           |
| [6257]ENERGY: 2140000 | 3216.8486   | 5271.6217  | 5420.2168   |           |
| 314.2899              | -14332.4831 | -1634.0982 | 0.0000      | 0.0000    |
| 7755.8173             | 6012.2131   | 303.2914   | -1743.6042  | 6074.5451 |
| 303.4103              | 33.8372     | -6.6437    | 511540.4688 | -21.9240  |
| -21.9447              |             |            |             |           |
| [6293]ENERGY: 2150000 | 3239.7992   | 5252.3824  | 5431.8692   |           |
| 339.0028              | -14236.8226 | -1749.4273 | 0.0000      | 0.0000    |
| 7736.6647             | 6013.4684   | 302.5424   | -1723.1964  | 6076.3376 |
| 303.4296              | -165.7940   | -232.0076  | 511540.4688 | -17.6122  |
| -17.5954              |             |            |             |           |
| [6343]ENERGY: 2160000 | 3173.1109   | 5296.8705  | 5482.5564   |           |
| 289.6801              | -14264.8476 | -1695.4333 | 0.0000      | 0.0000    |
| 7730.9179             | 6012.8549   | 302.3177   | -1718.0630  | 6075.8791 |
| 303.4976              | 297.4487    | 101.8584   | 511540.4688 | -16.8535  |
| -16.8718              |             |            |             |           |
| [6379]ENERGY: 2170000 | 3194.8262   | 5302.9368  | 5467.5451   |           |
| 318.0816              | -14301.9836 | -1741.3400 | 0.0000      | 0.0000    |
| 7772.0858             | 6012.1518   | 303.9275   | -1759.9339  | 6076.2112 |
| 303.5429              | -67.4222    | -6.4634    | 511540.4688 | -14.2794  |
| -14.2524              |             |            |             |           |
| [6429]ENERGY: 2180000 | 3174.2753   | 5252.5125  | 5426.0265   |           |
| 331.1167              | -14380.7973 | -1636.6096 | 0.0000      | 0.0000    |
| 7843.8038             | 6010.3279   | 306.7321   | -1833.4759  | 6073.9507 |
| 303.5016              | 215.3228    | 88.5924    | 511540.4688 | -18.0933  |
| -18.1248              |             |            |             |           |
| [6465]ENERGY: 2190000 | 3242.8592   | 5302.0252  | 5477.7289   |           |
| 346.6983              | -14353.0845 | -1726.2863 | 0.0000      | 0.0000    |
| 7724.0492             | 6013.9900   | 302.0491   | -1710.0592  | 6075.2978 |
| 303.3872              | -193.0257   | -268.7829  | 511540.4688 | -14.5810  |
| -14.5735              |             |            |             |           |
| [6518]ENERGY: 2200000 | 3289.7890   | 5346.1660  | 5472.3830   |           |
| 346.8262              | -14368.8705 | -1739.7077 | 0.0000      | 0.0000    |
| 7668.3487             | 6014.9346   | 299.8709   | -1653.4141  | 6075.6330 |
| 303.3373              | -180.9904   | -127.9047  | 511540.4688 | -17.4776  |
| -17.4491              |             |            |             |           |
| [6554]ENERGY: 2210000 | 3275.9198   | 5284.7428  | 5479.8596   |           |
| 330.4375              | -14334.0932 | -1807.6396 | 0.0000      | 0.0000    |
| 7782.0770             | 6011.3038   | 304.3182   | -1770.7732  | 6075.9365 |
| 303.3043              | -203.3319   | -272.7280  | 511540.4688 | -14.9278  |
| -14.9319              |             |            |             |           |
| [6604]ENERGY: 2220000 | 3223.3749   | 5286.4768  | 5428.8880   |           |
| 309.8924              | -14319.9786 | -1705.4955 | 0.0000      | 0.0000    |
| 7790.9867             | 6014.1446   | 304.6667   | -1776.8420  | 6076.7813 |
| 303.6664              | 5.9672      | -70.7838   | 511540.4688 | -19.9740  |
| -20.0001              |             |            |             |           |
| [6640]ENERGY: 2230000 | 3228.4261   | 5209.0998  | 5428.1390   |           |
| 326.3050              | -14323.7186 | -1637.5767 | 0.0000      | 0.0000    |
| 7781.5928             | 6012.2674   | 304.2993   | -1769.3254  | 6076.0601 |
| 303.6505              | -43.1171    | -17.2531   | 511540.4688 | -13.8154  |
| -13.7958              |             |            |             |           |
| [6690]ENERGY: 2240000 | 3162.1898   | 5266.8452  | 5499.4822   |           |
| 348.3659              | -14266.0376 | -1712.0739 | 0.0000      | 0.0000    |

Supplementary Text 6

|                       |             |            |             |           |
|-----------------------|-------------|------------|-------------|-----------|
| 7717.8534             | 6016.6249   | 301.8068   | -1701.2284  | 6077.4206 |
| 303.7559              | 210.0327    | 76.0211    | 511540.4688 | -12.9611  |
| -12.9612              |             |            |             |           |
| [6726]ENERGY: 2250000 | 3220.3937   | 5194.5040  | 5467.5288   |           |
| 334.6198              | -14293.3941 | -1652.3793 | 0.0000      | 0.0000    |
| 7744.9173             | 6016.1903   | 302.8651   | -1728.7270  | 6075.2390 |
| 303.6102              | -163.5937   | -114.7512  | 511540.4688 | -15.8788  |
| -15.8526              |             |            |             |           |
| [6776]ENERGY: 2260000 | 3180.5106   | 5310.0637  | 5424.9992   |           |
| 332.6449              | -14356.4215 | -1700.6534 | 0.0000      | 0.0000    |
| 7821.7006             | 6012.8440   | 305.8677   | -1808.8565  | 6075.6492 |
| 303.6272              | 9.5219      | -111.8324  | 511540.4688 | -14.1379  |
| -14.1552              |             |            |             |           |
| [6812]ENERGY: 2270000 | 3160.7628   | 5320.5222  | 5486.0352   |           |
| 330.0354              | -14370.5967 | -1716.2326 | 0.0000      | 0.0000    |
| 7798.5820             | 6009.1083   | 304.9637   | -1789.4737  | 6074.8536 |
| 303.7803              | -69.2448    | -112.8528  | 511540.4688 | -14.2659  |
| -14.2671              |             |            |             |           |
| [6862]ENERGY: 2280000 | 3240.2407   | 5266.2532  | 5423.6536   |           |
| 321.3810              | -14294.7314 | -1733.7693 | 0.0000      | 0.0000    |
| 7788.6666             | 6011.6944   | 304.5759   | -1776.9722  | 6075.3633 |
| 303.5915              | -6.2131     | -23.9474   | 511540.4688 | -12.6344  |
| -12.6418              |             |            |             |           |
| [6898]ENERGY: 2290000 | 3225.2097   | 5302.4201  | 5449.3099   |           |
| 336.3389              | -14269.3875 | -1762.8677 | 0.0000      | 0.0000    |
| 7734.2731             | 6015.2965   | 302.4489   | -1718.9766  | 6076.6168 |
| 303.4936              | -83.4444    | -76.6833   | 511540.4688 | -14.3350  |
| -14.3225              |             |            |             |           |
| [6951]ENERGY: 2300000 | 3211.6977   | 5297.4193  | 5463.3117   |           |
| 312.2385              | -14322.6039 | -1687.3615 | 0.0000      | 0.0000    |
| 7735.0238             | 6009.7257   | 302.4782   | -1725.2981  | 6074.7086 |
| 303.4137              | -21.9157    | -62.8860   | 511540.4688 | -11.7353  |
| -11.7403              |             |            |             |           |
| [6987]ENERGY: 2310000 | 3169.2523   | 5345.4424  | 5435.6009   |           |
| 310.4689              | -14313.9664 | -1736.3476 | 0.0000      | 0.0000    |
| 7800.4504             | 6010.9008   | 305.0367   | -1789.5496  | 6075.0676 |
| 303.5924              | -155.2978   | -129.7903  | 511540.4688 | -18.3820  |
| -18.3827              |             |            |             |           |
| [7037]ENERGY: 2320000 | 3201.6619   | 5276.4906  | 5495.8144   |           |
| 331.0900              | -14314.4641 | -1685.1578 | 0.0000      | 0.0000    |
| 7712.3834             | 6017.8186   | 301.5929   | -1694.5648  | 6076.5464 |
| 303.6184              | 192.5353    | 115.6993   | 511540.4688 | -14.5262  |
| -14.5587              |             |            |             |           |
| [7073]ENERGY: 2330000 | 3240.0201   | 5248.6843  | 5427.1119   |           |
| 323.4702              | -14295.1003 | -1696.0898 | 0.0000      | 0.0000    |
| 7766.1858             | 6014.2823   | 303.6968   | -1751.9035  | 6076.6727 |
| 303.3292              | -76.2987    | -121.2942  | 511540.4688 | -10.8157  |
| -10.7889              |             |            |             |           |
| [7123]ENERGY: 2340000 | 3184.8438   | 5261.0456  | 5469.0646   |           |
| 321.3272              | -14233.0555 | -1784.6730 | 0.0000      | 0.0000    |
| 7794.2764             | 6012.8291   | 304.7953   | -1781.4472  | 6077.5954 |
| 303.3920              | 18.7121     | 39.2958    | 511540.4688 | -17.5437  |
| -17.5559              |             |            |             |           |
| [7159]ENERGY: 2350000 | 3216.8360   | 5228.6066  | 5479.0094   |           |

Supplementary Text 6

|                       |             |            |             |           |
|-----------------------|-------------|------------|-------------|-----------|
| 349.2089              | -14251.0969 | -1779.5817 | 0.0000      | 0.0000    |
| 7771.9154             | 6014.8978   | 303.9209   | -1757.0176  | 6078.9826 |
| 303.4191              | -220.2319   | -238.9752  | 511540.4688 | -7.9645   |
| -7.9622               |             |            |             |           |
| [7209]ENERGY: 2360000 | 3214.7936   | 5275.9617  | 5481.0638   |           |
| 322.0010              | -14281.2181 | -1707.9969 | 0.0000      | 0.0000    |
| 7711.2888             | 6015.8939   | 301.5501   | -1695.3949  | 6077.4456 |
| 303.6073              | -127.3145   | -38.3457   | 511540.4688 | -16.3547  |
| -16.3427              |             |            |             |           |
| [7245]ENERGY: 2370000 | 3271.0725   | 5324.2738  | 5465.2883   |           |
| 319.3740              | -14351.7061 | -1737.3332 | 0.0000      | 0.0000    |
| 7723.8761             | 6014.8455   | 302.0423   | -1709.0305  | 6078.9348 |
| 303.6592              | 18.8008     | -135.0775  | 511540.4688 | -13.4900  |
| -13.4914              |             |            |             |           |
| [7295]ENERGY: 2380000 | 3219.4014   | 5212.5050  | 5457.6196   |           |
| 308.7447              | -14358.9005 | -1645.6516 | 0.0000      | 0.0000    |
| 7820.6327             | 6014.3513   | 305.8260   | -1806.2814  | 6077.5681 |
| 303.5157              | 195.4152    | 51.3700    | 511540.4688 | -12.6459  |
| -12.6523              |             |            |             |           |
| [7331]ENERGY: 2390000 | 3152.2360   | 5252.2344  | 5446.3683   |           |
| 331.3123              | -14291.7943 | -1686.8309 | 0.0000      | 0.0000    |
| 7810.1952             | 6013.7210   | 305.4178   | -1796.4742  | 6078.4099 |
| 303.6340              | 171.2457    | 106.9920   | 511540.4688 | -8.4575   |
| -8.4523               |             |            |             |           |
| [7384]ENERGY: 2400000 | 3207.0303   | 5331.7515  | 5454.3643   |           |
| 328.6462              | -14409.8175 | -1693.4603 | 0.0000      | 0.0000    |
| 7793.9947             | 6012.5091   | 304.7843   | -1781.4855  | 6078.2415 |
| 303.6393              | 57.0739     | -15.6318   | 511540.4688 | -14.8425  |
| -14.8403              |             |            |             |           |
| [7420]ENERGY: 2410000 | 3137.6518   | 5215.0625  | 5493.6075   |           |
| 345.0791              | -14337.2451 | -1676.1948 | 0.0000      | 0.0000    |
| 7836.0656             | 6014.0265   | 306.4295   | -1822.0391  | 6078.4263 |
| 303.4949              | 177.0763    | 121.3207   | 511540.4688 | -10.2809  |
| -10.2810              |             |            |             |           |
| [7470]ENERGY: 2420000 | 3172.1507   | 5350.5314  | 5501.5782   |           |
| 341.2738              | -14348.5912 | -1738.8817 | 0.0000      | 0.0000    |
| 7738.6507             | 6016.7119   | 302.6201   | -1721.9388  | 6079.8922 |
| 303.5045              | -91.0541    | -61.4430   | 511540.4688 | -14.1699  |
| -14.1645              |             |            |             |           |
| [7506]ENERGY: 2430000 | 3230.9379   | 5305.7947  | 5499.6219   |           |
| 331.8175              | -14345.7493 | -1666.6688 | 0.0000      | 0.0000    |
| 7664.9539             | 6020.7078   | 299.7381   | -1644.2460  | 6080.9744 |
| 303.3108              | 107.5851    | -8.1536    | 511540.4688 | -7.7171   |
| -7.7477               |             |            |             |           |
| [7556]ENERGY: 2440000 | 3180.0516   | 5327.4666  | 5377.3454   |           |
| 313.1599              | -14384.4244 | -1600.5693 | 0.0000      | 0.0000    |
| 7800.8082             | 6013.8380   | 305.0507   | -1786.9701  | 6078.7348 |
| 303.2425              | 59.6086     | 157.8165   | 511540.4688 | -10.5334  |
| -10.5059              |             |            |             |           |
| [7592]ENERGY: 2450000 | 3162.9530   | 5352.8757  | 5549.8096   |           |
| 302.7813              | -14341.5235 | -1727.8740 | 0.0000      | 0.0000    |
| 7717.7969             | 6016.8191   | 301.8046   | -1700.9778  | 6080.3197 |
| 303.2677              | 121.8975    | 92.1044    | 511540.4688 | -10.4094  |
| -10.4294              |             |            |             |           |

## Supplementary Text 6

|                       |             |            |             |           |
|-----------------------|-------------|------------|-------------|-----------|
| [7642]ENERGY: 2460000 | 3260.9250   | 5294.0361  | 5527.9795   |           |
| 319.9392              | -14360.1695 | -1689.1808 | 0.0000      | 0.0000    |
| 7666.9653             | 6020.4949   | 299.8168   | -1646.4704  | 6080.4149 |
| 303.4061              | 97.4391     | 75.5212    | 511540.4688 | -6.7200   |
| -6.7357               |             |            |             |           |
| [7678]ENERGY: 2470000 | 3155.4198   | 5298.6540  | 5490.1811   |           |
| 310.3403              | -14291.2281 | -1702.7966 | 0.0000      | 0.0000    |
| 7754.9543             | 6015.5247   | 303.2576   | -1739.4295  | 6080.7195 |
| 303.4770              | 59.8311     | -132.9274  | 511540.4688 | -6.5777   |
| -6.5398               |             |            |             |           |
| [7728]ENERGY: 2480000 | 3268.2178   | 5257.8652  | 5457.9794   |           |
| 320.4187              | -14328.2917 | -1680.8138 | 0.0000      | 0.0000    |
| 7725.5293             | 6020.9050   | 302.1069   | -1704.6243  | 6080.6981 |
| 303.5198              | -7.8650     | -68.1073   | 511540.4688 | -11.6084  |
| -11.6059              |             |            |             |           |
| [7764]ENERGY: 2490000 | 3195.4820   | 5333.4957  | 5474.5453   |           |
| 330.1754              | -14373.5899 | -1652.0266 | 0.0000      | 0.0000    |
| 7708.1746             | 6016.2566   | 301.4283   | -1691.9180  | 6080.4047 |
| 303.6730              | 177.0181    | 157.1366   | 511540.4688 | -10.7142  |
| -10.7160              |             |            |             |           |
| [7817]ENERGY: 2500000 | 3186.3890   | 5255.2256  | 5448.3468   |           |
| 320.8935              | -14253.1310 | -1698.0901 | 0.0000      | 0.0000    |
| 7760.4325             | 6020.0661   | 303.4718   | -1740.3663  | 6081.3859 |
| 303.6188              | -82.6019    | -86.2815   | 511540.4688 | -9.2493   |
| -9.2859               |             |            |             |           |
| [7853]ENERGY: 2510000 | 3251.7912   | 5264.6403  | 5455.3136   |           |
| 326.2291              | -14317.9912 | -1678.0158 | 0.0000      | 0.0000    |
| 7719.3514             | 6021.3187   | 301.8654   | -1698.0327  | 6082.1644 |
| 303.7109              | -36.0977    | -100.7278  | 511540.4688 | -9.6234   |
| -9.5835               |             |            |             |           |
| [7903]ENERGY: 2520000 | 3158.8234   | 5328.2193  | 5469.7691   |           |
| 360.5800              | -14327.5101 | -1787.2918 | 0.0000      | 0.0000    |
| 7816.7200             | 6019.3099   | 305.6730   | -1797.4101  | 6081.7290 |
| 303.6296              | -83.9441    | -143.7639  | 511540.4688 | -13.1388  |
| -13.1535              |             |            |             |           |
| [7939]ENERGY: 2530000 | 3276.7468   | 5256.5050  | 5438.1188   |           |
| 303.0808              | -14305.2620 | -1761.8752 | 0.0000      | 0.0000    |
| 7811.4485             | 6018.7626   | 305.4668   | -1792.6859  | 6082.7856 |
| 303.5327              | -138.2893   | -168.2877  | 511540.4688 | -12.3635  |
| -12.3519              |             |            |             |           |
| [7989]ENERGY: 2540000 | 3181.2661   | 5254.9721  | 5460.0617   |           |
| 304.9659              | -14352.7956 | -1656.4982 | 0.0000      | 0.0000    |
| 7826.5746             | 6018.5465   | 306.0583   | -1808.0280  | 6082.6047 |
| 303.7825              | 68.3765     | -9.8606    | 511540.4688 | -13.4467  |
| -13.4650              |             |            |             |           |
| [8025]ENERGY: 2550000 | 3240.7419   | 5292.6451  | 5508.6557   |           |
| 326.2985              | -14345.0068 | -1742.2134 | 0.0000      | 0.0000    |
| 7741.7515             | 6022.8725   | 302.7413   | -1718.8790  | 6082.9408 |
| 303.6502              | 94.1117     | 40.7739    | 511540.4688 | -12.5858  |
| -12.5915              |             |            |             |           |
| [8075]ENERGY: 2560000 | 3253.1115   | 5248.4076  | 5500.6796   |           |
| 339.6395              | -14427.0132 | -1680.1674 | 0.0000      | 0.0000    |
| 7784.4534             | 6019.1111   | 304.4112   | -1765.3423  | 6082.8345 |
| 303.7458              | -79.7699    | -109.9590  | 511540.4688 | -11.1998  |



Supplementary Text 6

-11.1860  
 [8111]ENERGY: 2570000      3189.3523      5193.1357      5435.9978  
 352.4779      -14322.0199      -1718.8553      0.0000      0.0000  
 7887.0051      6017.0935      308.4215      -1869.9116      6083.2405  
 303.8989      52.7228      -103.5781      511540.4688      -10.3834  
 -10.3985  
 [8161]ENERGY: 2580000      3222.8961      5306.1972      5454.7697  
 322.6157      -14346.3424      -1728.4938      0.0000      0.0000  
 7786.7999      6018.4424      304.5029      -1768.3576      6083.6975  
 303.8200      -69.4408      -136.7138      511540.4688      -11.4389  
 -11.4286  
 [8197]ENERGY: 2590000      3231.0758      5321.4973      5547.2260  
 329.3196      -14351.3110      -1752.9361      0.0000      0.0000  
 7696.7686      6021.6403      300.9823      -1675.1283      6084.1832  
 303.7252      -41.0177      -80.7122      511540.4688      -11.7791  
 -11.7855  
 [8250]ENERGY: 2600000      3156.3410      5338.0459      5481.1262  
 330.1378      -14370.3496      -1678.3183      0.0000      0.0000  
 7765.6304      6022.6135      303.6751      -1743.0170      6084.1577  
 303.6845      37.2259      80.8785      511540.4688      -13.5462  
 -13.5435  
 [8286]ENERGY: 2610000      3211.6818      5314.4114      5535.9775  
 318.8734      -14348.7747      -1738.4223      0.0000      0.0000  
 7728.0433      6021.7904      302.2053      -1706.2529      6084.6729  
 303.9685      -28.9322      -132.9045      511540.4688      -10.3607  
 -10.3684  
 [8336]ENERGY: 2620000      3190.3375      5272.0988      5490.9880  
 349.7242      -14356.3549      -1657.8199      0.0000      0.0000  
 7734.6958      6023.6696      302.4654      -1711.0262      6084.5384  
 303.8687      131.0901      79.4483      511540.4688      -10.0030  
 -9.9910  
 [8372]ENERGY: 2630000      3282.8771      5241.3389      5468.2297  
 340.0911      -14356.5953      -1736.4871      0.0000      0.0000  
 7781.0854      6020.5398      304.2795      -1760.5456      6083.6068  
 303.7907      -180.5729      -142.5433      511540.4688      -12.8694  
 -12.8669  
 [8422]ENERGY: 2640000      3250.3331      5289.5807      5469.1046  
 328.2435      -14394.7539      -1663.6414      0.0000      0.0000  
 7741.8860      6020.7526      302.7466      -1721.1334      6085.1236  
 303.8060      56.4724      -1.1028      511540.4688      -16.5043  
 -16.5096  
 [8458]ENERGY: 2650000      3252.5940      5335.6571      5473.5496  
 350.9712      -14362.3357      -1696.3388      0.0000      0.0000  
 7672.0939      6026.1914      300.0173      -1645.9024      6084.4916  
 303.7070      112.7483      32.7645      511540.4688      -12.2793  
 -12.2490  
 [8508]ENERGY: 2660000      3230.4584      5233.5115      5427.6502  
 335.1166      -14335.0479      -1649.7140      0.0000      0.0000  
 7779.4436      6021.4186      304.2153      -1758.0250      6083.0000  
 303.7550      -133.2665      -81.7725      511540.4688      -13.6193  
 -13.6351  
 [8544]ENERGY: 2670000      3225.1451      5263.5169      5446.3059  
 314.3221      -14219.8906      -1773.9673      0.0000      0.0000  
 7766.8657      6022.2978      303.7234      -1744.5680      6086.3050

## Supplementary Text 6

|                       |             |            |             |           |
|-----------------------|-------------|------------|-------------|-----------|
| 303.6892              | -7.2188     | -45.7979   | 511540.4688 | -10.0569  |
| -10.0860              |             |            |             |           |
| [8594]ENERGY: 2680000 | 3248.4758   | 5295.5137  | 5458.9593   |           |
| 308.8287              | -14351.5736 | -1740.4464 | 0.0000      | 0.0000    |
| 7798.4678             | 6018.2253   | 304.9592   | -1780.2425  | 6084.5033 |
| 303.7419              | -12.4515    | -94.3170   | 511540.4688 | -14.5561  |
| -14.5296              |             |            |             |           |
| [8630]ENERGY: 2690000 | 3108.7655   | 5352.0305  | 5488.6404   |           |
| 342.4620              | -14409.6804 | -1631.5393 | 0.0000      | 0.0000    |
| 7768.2160             | 6018.8946   | 303.7762   | -1749.3213  | 6083.8785 |
| 303.8723              | 142.4661    | 113.5475   | 511540.4688 | -11.1121  |
| -11.1167              |             |            |             |           |
| [8683]ENERGY: 2700000 | 3199.0138   | 5291.3418  | 5403.0656   |           |
| 328.7691              | -14334.9612 | -1645.6908 | 0.0000      | 0.0000    |
| 7778.7144             | 6020.2526   | 304.1867   | -1758.4617  | 6085.4919 |
| 303.7600              | 327.6358    | 280.2836   | 511540.4688 | -11.5869  |
| -11.5758              |             |            |             |           |
| [8719]ENERGY: 2710000 | 3244.2458   | 5245.6432  | 5465.1597   |           |
| 334.3459              | -14263.7900 | -1664.7881 | 0.0000      | 0.0000    |
| 7665.7408             | 6026.5572   | 299.7689   | -1639.1835  | 6085.7094 |
| 303.7784              | 77.1355     | 49.9472    | 511540.4688 | -12.0844  |
| -12.0986              |             |            |             |           |
| [8769]ENERGY: 2720000 | 3185.6171   | 5345.1684  | 5523.7797   |           |
| 306.9310              | -14480.1563 | -1646.0221 | 0.0000      | 0.0000    |
| 7786.2278             | 6021.5458   | 304.4806   | -1764.6821  | 6084.8239 |
| 303.8627              | 67.2214     | 132.9108   | 511540.4688 | -13.6685  |
| -13.6534              |             |            |             |           |
| [8805]ENERGY: 2730000 | 3207.5171   | 5280.2063  | 5451.6225   |           |
| 345.2477              | -14316.2953 | -1643.1066 | 0.0000      | 0.0000    |
| 7697.1893             | 6022.3811   | 300.9987   | -1674.8083  | 6083.8896 |
| 303.8024              | -132.7569   | -13.5124   | 511540.4688 | -11.2682  |
| -11.2753              |             |            |             |           |
| [8855]ENERGY: 2740000 | 3167.8107   | 5212.7559  | 5486.6807   |           |
| 309.2004              | -14227.5447 | -1688.4836 | 0.0000      | 0.0000    |
| 7762.3052             | 6022.7247   | 303.5451   | -1739.5806  | 6084.9432 |
| 303.4499              | 58.0758     | -22.9287   | 511540.4688 | -16.4475  |
| -16.4626              |             |            |             |           |
| [8891]ENERGY: 2750000 | 3193.6186   | 5301.2365  | 5501.3444   |           |
| 336.5523              | -14248.5145 | -1742.6510 | 0.0000      | 0.0000    |
| 7681.7013             | 6023.2875   | 300.3930   | -1658.4138  | 6084.9568 |
| 303.7689              | 31.4458     | -23.0214   | 511540.4688 | -10.1262  |
| -10.1158              |             |            |             |           |
| [8941]ENERGY: 2760000 | 3207.6455   | 5345.8360  | 5436.6479   |           |
| 333.3237              | -14316.9523 | -1703.7209 | 0.0000      | 0.0000    |
| 7723.5595             | 6026.3394   | 302.0299   | -1697.2201  | 6086.0646 |
| 303.8454              | -17.3590    | -119.7568  | 511540.4688 | -13.8866  |
| -13.9053              |             |            |             |           |
| [8977]ENERGY: 2770000 | 3227.3128   | 5166.7952  | 5445.4651   |           |
| 294.5721              | -14317.7176 | -1649.7287 | 0.0000      | 0.0000    |
| 7853.4814             | 6020.1802   | 307.1105   | -1833.3012  | 6085.7284 |
| 303.8530              | 68.6934     | -121.9300  | 511540.4688 | -12.9946  |
| -13.0082              |             |            |             |           |
| [9027]ENERGY: 2780000 | 3170.6302   | 5280.5261  | 5450.5674   |           |
| 311.2896              | -14273.6980 | -1698.0877 | 0.0000      | 0.0000    |

## Supplementary Text 6

|                       |             |            |             |           |
|-----------------------|-------------|------------|-------------|-----------|
| 7782.5160             | 6023.7436   | 304.3354   | -1758.7725  | 6085.7433 |
| 303.8114              | -90.2818    | 13.5148    | 511540.4688 | -13.1617  |
| -13.1411              |             |            |             |           |
| [9063]ENERGY: 2790000 | 3242.6642   | 5314.4986  | 5448.1959   |           |
| 326.7704              | -14303.2216 | -1743.4772 | 0.0000      | 0.0000    |
| 7738.5676             | 6023.9981   | 302.6168   | -1714.5696  | 6086.6940 |
| 303.9065              | -46.4421    | 22.7739    | 511540.4688 | -10.8304  |
| -10.8186              |             |            |             |           |
| [9116]ENERGY: 2800000 | 3201.3701   | 5258.4788  | 5431.9845   |           |
| 314.6184              | -14259.7717 | -1692.5290 | 0.0000      | 0.0000    |
| 7769.6145             | 6023.7655   | 303.8309   | -1745.8490  | 6086.8257 |
| 303.7917              | -169.1800   | -142.6301  | 511540.4688 | -14.9029  |
| -14.9155              |             |            |             |           |
| [9152]ENERGY: 2810000 | 3202.8190   | 5313.3404  | 5473.6358   |           |
| 325.3949              | -14335.3982 | -1699.1622 | 0.0000      | 0.0000    |
| 7744.6404             | 6025.2701   | 302.8543   | -1719.3703  | 6086.7703 |
| 303.7798              | -199.5593   | -144.9483  | 511540.4688 | -12.3561  |
| -12.3472              |             |            |             |           |
| [9202]ENERGY: 2820000 | 3230.6854   | 5355.4937  | 5433.9902   |           |
| 336.3496              | -14356.3970 | -1693.6816 | 0.0000      | 0.0000    |
| 7718.8276             | 6025.2679   | 301.8449   | -1693.5597  | 6086.9485 |
| 303.8743              | 201.7065    | 226.5665   | 511540.4688 | -15.7702  |
| -15.7817              |             |            |             |           |
| [9238]ENERGY: 2830000 | 3260.7464   | 5284.4100  | 5447.8069   |           |
| 327.4082              | -14332.4032 | -1742.6051 | 0.0000      | 0.0000    |
| 7776.7577             | 6022.1210   | 304.1102   | -1754.6367  | 6087.1562 |
| 304.0031              | -135.1222   | -261.3490  | 511540.4688 | -13.9607  |
| -13.9543              |             |            |             |           |
| [9288]ENERGY: 2840000 | 3165.6750   | 5290.7422  | 5473.1779   |           |
| 334.6217              | -14245.9403 | -1723.8731 | 0.0000      | 0.0000    |
| 7729.7935             | 6024.1969   | 302.2737   | -1705.5965  | 6088.2192 |
| 303.9354              | 126.1879    | 57.2654    | 511540.4688 | -16.6393  |
| -16.6291              |             |            |             |           |
| [9324]ENERGY: 2850000 | 3216.9521   | 5331.2605  | 5445.7271   |           |
| 310.2402              | -14332.8525 | -1680.1010 | 0.0000      | 0.0000    |
| 7734.4007             | 6025.6271   | 302.4539   | -1708.7736  | 6087.0474 |
| 303.9084              | -25.9508    | -33.7329   | 511540.4688 | -16.0588  |
| -16.0532              |             |            |             |           |
| [9374]ENERGY: 2860000 | 3215.3320   | 5385.2235  | 5496.3382   |           |
| 315.5419              | -14387.2609 | -1724.8977 | 0.0000      | 0.0000    |
| 7727.6272             | 6027.9042   | 302.1890   | -1699.7230  | 6088.8978 |
| 303.9027              | -119.1498   | -172.6268  | 511540.4688 | -18.0516  |
| -18.0459              |             |            |             |           |
| [9410]ENERGY: 2870000 | 3196.2284   | 5325.9850  | 5441.8678   |           |
| 314.7981              | -14307.8651 | -1705.6098 | 0.0000      | 0.0000    |
| 7761.0394             | 6026.4438   | 303.4956   | -1734.5956  | 6088.4225 |
| 303.8897              | 302.4218    | 158.4159   | 511540.4688 | -14.9812  |
| -15.0064              |             |            |             |           |
| [9460]ENERGY: 2880000 | 3124.7157   | 5393.2066  | 5481.7224   |           |
| 323.9992              | -14327.9229 | -1712.2368 | 0.0000      | 0.0000    |
| 7743.2404             | 6026.7246   | 302.7995   | -1716.5158  | 6088.8511 |
| 304.1203              | 35.3561     | -7.5498    | 511540.4688 | -16.6671  |
| -16.6409              |             |            |             |           |
| [9496]ENERGY: 2890000 | 3187.1621   | 5316.4026  | 5462.0114   |           |

## Supplementary Text 6

|                       |             |            |             |           |
|-----------------------|-------------|------------|-------------|-----------|
| 303.7098              | -14237.3310 | -1753.6721 | 0.0000      | 0.0000    |
| 7748.6374             | 6026.9203   | 303.0106   | -1721.7171  | 6089.6378 |
| 303.9577              | 26.0660     | -23.0024   | 511540.4688 | -17.5460  |
| -17.5860              |             |            |             |           |
| [9549]ENERGY: 2900000 | 3302.7013   | 5283.1137  | 5466.9419   |           |
| 339.3333              | -14380.9563 | -1717.0532 | 0.0000      | 0.0000    |
| 7732.3376             | 6026.4183   | 302.3732   | -1705.9194  | 6087.9192 |
| 304.1241              | -187.3446   | -157.8434  | 511540.4688 | -14.7760  |
| -14.7624              |             |            |             |           |
| [9585]ENERGY: 2910000 | 3202.7463   | 5344.0151  | 5472.5187   |           |
| 326.4546              | -14215.3425 | -1751.9674 | 0.0000      | 0.0000    |
| 7650.1026             | 6028.5274   | 299.1574   | -1621.5752  | 6088.8551 |
| 304.0520              | -248.0963   | -153.5176  | 511540.4688 | -14.8377  |
| -14.8279              |             |            |             |           |
| [9635]ENERGY: 2920000 | 3183.6429   | 5362.6388  | 5497.9098   |           |
| 336.4744              | -14394.2037 | -1627.5744 | 0.0000      | 0.0000    |
| 7669.2092             | 6028.0968   | 299.9045   | -1641.1123  | 6088.9570 |
| 304.0085              | 183.4123    | 164.9136   | 511540.4688 | -13.0089  |
| -13.0294              |             |            |             |           |
| [9671]ENERGY: 2930000 | 3254.2806   | 5284.1783  | 5453.9049   |           |
| 310.0865              | -14376.2322 | -1635.8843 | 0.0000      | 0.0000    |
| 7737.1372             | 6027.4709   | 302.5609   | -1709.6663  | 6088.6385 |
| 304.0881              | 55.8359     | -29.4771   | 511540.4688 | -14.3732  |
| -14.3699              |             |            |             |           |
| [9721]ENERGY: 2940000 | 3232.5935   | 5391.0959  | 5466.8784   |           |
| 326.1793              | -14345.6759 | -1712.3545 | 0.0000      | 0.0000    |
| 7667.6814             | 6026.3981   | 299.8448   | -1641.2833  | 6087.7316 |
| 304.1130              | -27.9684    | -40.8522   | 511540.4688 | -20.1210  |
| -20.0958              |             |            |             |           |
| [9757]ENERGY: 2950000 | 3141.0484   | 5293.6839  | 5472.6036   |           |
| 325.2434              | -14368.6873 | -1630.8540 | 0.0000      | 0.0000    |
| 7792.4325             | 6025.4706   | 304.7232   | -1766.9620  | 6088.8776 |
| 304.1202              | 241.8516    | 120.6474   | 511540.4688 | -11.4910  |
| -11.5058              |             |            |             |           |
| [9807]ENERGY: 2960000 | 3194.3313   | 5335.4676  | 5444.2155   |           |
| 311.5744              | -14337.9152 | -1659.1259 | 0.0000      | 0.0000    |
| 7733.1792             | 6021.7269   | 302.4061   | -1711.4524  | 6089.2706 |
| 303.9660              | 8.2422      | 69.8511    | 511540.4688 | -18.0178  |
| -18.0137              |             |            |             |           |
| [9843]ENERGY: 2970000 | 3163.9029   | 5328.7483  | 5510.3662   |           |
| 319.8766              | -14300.4187 | -1756.0646 | 0.0000      | 0.0000    |
| 7760.0940             | 6026.5047   | 303.4586   | -1733.5893  | 6089.3191 |
| 304.2341              | 100.8354    | 37.3410    | 511540.4688 | -12.8068  |
| -12.8072              |             |            |             |           |
| [9893]ENERGY: 2980000 | 3218.0155   | 5343.1922  | 5455.3329   |           |
| 328.6098              | -14374.3585 | -1698.4450 | 0.0000      | 0.0000    |
| 7754.5612             | 6026.9081   | 303.2422   | -1727.6531  | 6089.4453 |
| 304.2972              | -46.7967    | -36.2940   | 511540.4688 | -16.5021  |
| -16.5008              |             |            |             |           |
| [9929]ENERGY: 2990000 | 3250.3200   | 5190.0167  | 5473.0386   |           |
| 318.1071              | -14374.3099 | -1596.8237 | 0.0000      | 0.0000    |
| 7768.3012             | 6028.6501   | 303.7795   | -1739.6511  | 6088.5405 |
| 304.2039              | 138.1943    | 103.3154   | 511540.4688 | -15.6601  |
| -15.6716              |             |            |             |           |

Supplementary Text 6

|                        |             |            |             |           |
|------------------------|-------------|------------|-------------|-----------|
| [9982]ENERGY: 3000000  | 3242.8510   | 5316.3742  | 5497.0429   |           |
| 323.5909               | -14302.8507 | -1772.2835 | 0.0000      | 0.0000    |
| 7721.2037              | 6025.9283   | 301.9378   | -1695.2754  | 6090.1700 |
| 304.2994               | -9.2326     | -43.3238   | 511540.4688 | -14.8950  |
| -14.8688               |             |            |             |           |
| [10018]ENERGY: 3010000 | 3197.1511   | 5304.7326  | 5483.4850   |           |
| 318.4660               | -14433.7605 | -1663.0179 | 0.0000      | 0.0000    |
| 7817.4038              | 6024.4602   | 305.6997   | -1792.9437  | 6090.0877 |
| 304.3097               | 178.4358    | 93.9845    | 511540.4688 | -15.4331  |
| -15.4525               |             |            |             |           |
| [10068]ENERGY: 3020000 | 3215.8622   | 5201.8047  | 5475.4278   |           |
| 319.0872               | -14324.3823 | -1715.0138 | 0.0000      | 0.0000    |
| 7850.6867              | 6023.4725   | 307.0012   | -1827.2142  | 6089.2813 |
| 304.2682               | -237.4033   | -124.9491  | 511540.4688 | -17.8574  |
| -17.8644               |             |            |             |           |
| [10104]ENERGY: 3030000 | 3205.7529   | 5205.8967  | 5431.6522   |           |
| 317.9969               | -14290.3562 | -1690.0138 | 0.0000      | 0.0000    |
| 7845.4035              | 6026.3321   | 306.7946   | -1819.0713  | 6090.4647 |
| 304.2712               | -116.8664   | -34.9078   | 511540.4688 | -18.3228  |
| -18.2862               |             |            |             |           |
| [10154]ENERGY: 3040000 | 3264.8675   | 5225.8665  | 5436.0636   |           |
| 322.2852               | -14345.2747 | -1684.6252 | 0.0000      | 0.0000    |
| 7806.5868              | 6025.7698   | 305.2767   | -1780.8170  | 6089.3181 |
| 304.2402               | 24.7553     | -37.5126   | 511540.4688 | -11.0340  |
| -11.0685               |             |            |             |           |
| [10190]ENERGY: 3050000 | 3219.9965   | 5226.6653  | 5439.3250   |           |
| 324.3761               | -14328.9578 | -1691.4440 | 0.0000      | 0.0000    |
| 7838.2478              | 6028.2088   | 306.5148   | -1810.0390  | 6091.1592 |
| 304.3847               | -173.9300   | -183.8452  | 511540.4688 | -19.7942  |
| -19.7800               |             |            |             |           |
| [10240]ENERGY: 3060000 | 3281.8461   | 5271.2994  | 5436.6489   |           |
| 339.5545               | -14413.6080 | -1592.1075 | 0.0000      | 0.0000    |
| 7710.3395              | 6033.9728   | 301.5129   | -1676.3667  | 6091.0904 |
| 304.3235               | 146.7140    | 41.1207    | 511540.4688 | -13.2629  |
| -13.2797               |             |            |             |           |
| [10276]ENERGY: 3070000 | 3190.9383   | 5316.0563  | 5458.8827   |           |
| 296.8558               | -14317.3049 | -1704.9962 | 0.0000      | 0.0000    |
| 7785.8374              | 6026.2695   | 304.4653   | -1759.5680  | 6090.4788 |
| 304.2770               | 54.2585     | 46.0997    | 511540.4688 | -18.9628  |
| -18.9440               |             |            |             |           |
| [10326]ENERGY: 3080000 | 3217.9807   | 5261.5426  | 5489.5802   |           |
| 300.0744               | -14387.6293 | -1618.6251 | 0.0000      | 0.0000    |
| 7767.1957              | 6030.1192   | 303.7363   | -1737.0765  | 6090.3946 |
| 303.9749               | -105.8194   | -68.5529   | 511540.4688 | -11.9892  |
| -11.9998               |             |            |             |           |
| [10362]ENERGY: 3090000 | 3201.2752   | 5248.3660  | 5442.7881   |           |
| 320.8708               | -14303.1041 | -1698.2726 | 0.0000      | 0.0000    |
| 7815.7748              | 6027.6982   | 305.6360   | -1788.0766  | 6092.0704 |
| 304.2269               | 91.4609     | 26.5899    | 511540.4688 | -17.1237  |
| -17.1112               |             |            |             |           |
| [10415]ENERGY: 3100000 | 3254.8958   | 5321.1368  | 5488.9303   |           |
| 343.8860               | -14349.1633 | -1736.5071 | 0.0000      | 0.0000    |
| 7708.9998              | 6032.1783   | 301.4606   | -1676.8215  | 6091.8423 |
| 304.2308               | -91.1016    | -141.3350  | 511540.4688 | -16.3104  |

Supplementary Text 6

-16.3283  
 [10451]ENERGY: 3110000      3129.7797      5253.5828      5497.9610  
 343.9797      -14309.6946      -1710.1881      0.0000      0.0000  
 7821.0952      6026.5157      305.8440      -1794.5795      6092.9884  
 304.1338      40.9320      -55.7367      511540.4688      -19.1758  
 -19.1649  
 [10501]ENERGY: 3120000      3221.8274      5263.7956      5460.4010  
 318.9547      -14381.5686      -1706.4920      0.0000      0.0000  
 7853.6538      6030.5718      307.1173      -1823.0820      6092.9606  
 304.3404      113.0046      33.4418      511540.4688      -12.7014  
 -12.6977  
 [10537]ENERGY: 3130000      3248.8805      5308.0287      5432.5505  
 320.9485      -14319.0496      -1667.7432      0.0000      0.0000  
 7709.6052      6033.2206      301.4842      -1676.3846      6093.4166  
 304.3737      81.8511      35.0038      511540.4688      -22.9182  
 -22.9272  
 [10587]ENERGY: 3140000      3224.2972      5301.0311      5444.5442  
 327.4201      -14368.7716      -1669.3275      0.0000      0.0000  
 7774.8737      6034.0673      304.0366      -1740.8064      6092.7585  
 304.3850      13.3825      12.1583      511540.4688      -15.0633  
 -15.0399  
 [10623]ENERGY: 3150000      3229.6600      5232.3377      5474.9425  
 320.5880      -14283.2945      -1735.8751      0.0000      0.0000  
 7789.5378      6027.8964      304.6100      -1761.6414      6093.3066  
 304.4820      29.9378      -174.8534      511540.4688      -14.7951  
 -14.8227  
 [10673]ENERGY: 3160000      3219.3002      5276.5495      5472.2690  
 317.7082      -14308.1126      -1696.8929      0.0000      0.0000  
 7751.4593      6032.2807      303.1209      -1719.1786      6092.0347  
 304.3709      107.4485      133.0961      511540.4688      -22.6049  
 -22.5606  
 [10709]ENERGY: 3170000      3250.3437      5259.8255      5446.4083  
 328.6113      -14279.2037      -1740.4601      0.0000      0.0000  
 7762.6148      6028.1397      303.5572      -1734.4751      6091.3645  
 304.3430      -30.4373      -96.6939      511540.4688      -13.5252  
 -13.5641  
 [10759]ENERGY: 3180000      3207.2783      5299.7987      5494.2931  
 298.5236      -14305.6043      -1732.2379      0.0000      0.0000  
 7766.6547      6028.7063      303.7152      -1737.9484      6092.2562  
 304.3901      -147.8836      -90.9070      511540.4688      -17.1993  
 -17.1948  
 [10795]ENERGY: 3190000      3277.6054      5246.5950      5426.0340  
 338.1956      -14335.3878      -1743.6157      0.0000      0.0000  
 7821.4053      6030.8318      305.8562      -1790.5735      6092.7860  
 304.3755      299.8345      118.5132      511540.4688      -16.8122  
 -16.8374  
 [10848]ENERGY: 3200000      3279.1294      5326.1784      5487.0103  
 332.8223      -14415.1415      -1688.2115      0.0000      0.0000  
 7710.3720      6032.1594      301.5142      -1678.2126      6093.0225  
 304.4321      -73.5138      -64.9521      511540.4688      -15.7193  
 -15.6798  
 [10884]ENERGY: 3210000      3210.3487      5293.7571      5384.9135  
 337.7881      -14297.2223      -1773.5766      0.0000      0.0000  
 7870.9235      6026.9320      307.7926      -1843.9915      6092.8083

## Supplementary Text 6

|                        |             |            |             |           |
|------------------------|-------------|------------|-------------|-----------|
| 304.4736               | -0.8374     | -15.0306   | 511540.4688 | -12.1509  |
| -12.1542               |             |            |             |           |
| [10934]ENERGY: 3220000 | 3235.5363   | 5326.9831  | 5427.9622   |           |
| 330.0521               | -14346.1220 | -1694.7198 | 0.0000      | 0.0000    |
| 7751.0251              | 6030.7171   | 303.1040   | -1720.3080  | 6092.4986 |
| 304.1915               | -82.1257    | -127.3083  | 511540.4688 | -17.6650  |
| -17.6658               |             |            |             |           |
| [10970]ENERGY: 3230000 | 3210.0663   | 5192.3704  | 5487.7121   |           |
| 311.3187               | -14333.2797 | -1656.4480 | 0.0000      | 0.0000    |
| 7814.1038              | 6025.8435   | 305.5707   | -1788.2603  | 6091.0932 |
| 304.0730               | 0.2185      | 0.7277     | 511540.4688 | -14.7666  |
| -14.7524               |             |            |             |           |
| [11020]ENERGY: 3240000 | 3223.7609   | 5238.6293  | 5473.9084   |           |
| 327.2641               | -14288.5024 | -1754.2471 | 0.0000      | 0.0000    |
| 7807.6561              | 6028.4693   | 305.3185   | -1779.1868  | 6091.8855 |
| 304.3204               | 86.4801     | 11.2080    | 511540.4688 | -12.1964  |
| -12.2249               |             |            |             |           |
| [11056]ENERGY: 3250000 | 3265.6240   | 5213.7463  | 5437.9818   |           |
| 290.1433               | -14278.2388 | -1730.3559 | 0.0000      | 0.0000    |
| 7831.8942              | 6030.7949   | 306.2663   | -1801.0993  | 6092.9430 |
| 304.4615               | 1.0755      | -23.8369   | 511540.4688 | -11.8539  |
| -11.8461               |             |            |             |           |
| [11106]ENERGY: 3260000 | 3194.8290   | 5250.9335  | 5516.0803   |           |
| 323.0122               | -14372.6037 | -1699.0710 | 0.0000      | 0.0000    |
| 7815.5257              | 6028.7059   | 305.6263   | -1786.8197  | 6093.1886 |
| 304.3565               | 18.9016     | -27.5359   | 511540.4688 | -13.7954  |
| -13.7817               |             |            |             |           |
| [11142]ENERGY: 3270000 | 3247.3492   | 5308.5148  | 5449.1883   |           |
| 318.1203               | -14336.3041 | -1771.2357 | 0.0000      | 0.0000    |
| 7814.8466              | 6030.4794   | 305.5997   | -1784.3671  | 6093.5193 |
| 304.4718               | 57.7898     | -41.9856   | 511540.4688 | -12.5401  |
| -12.5556               |             |            |             |           |
| [11192]ENERGY: 3280000 | 3204.9057   | 5286.9226  | 5489.8953   |           |
| 315.4691               | -14282.5979 | -1749.8827 | 0.0000      | 0.0000    |
| 7768.2992              | 6033.0112   | 303.7795   | -1735.2879  | 6094.1413 |
| 304.3668               | -92.1536    | -57.2301   | 511540.4688 | -17.1923  |
| -17.1944               |             |            |             |           |
| [11228]ENERGY: 3290000 | 3267.6116   | 5299.3968  | 5496.2464   |           |
| 320.0017               | -14373.5656 | -1686.2456 | 0.0000      | 0.0000    |
| 7709.5372              | 6032.9825   | 301.4816   | -1676.5546  | 6093.3178 |
| 304.4496               | 54.0625     | 14.8633    | 511540.4688 | -9.5803   |
| -9.6030                |             |            |             |           |
| [11281]ENERGY: 3300000 | 3214.5836   | 5358.2403  | 5459.3933   |           |
| 289.6485               | -14404.2082 | -1682.9725 | 0.0000      | 0.0000    |
| 7793.2236              | 6027.9087   | 304.7541   | -1765.3149  | 6092.6606 |
| 304.4562               | -95.5678    | -12.3580   | 511540.4688 | -16.5215  |
| -16.4914               |             |            |             |           |
| [11317]ENERGY: 3310000 | 3238.0105   | 5259.7684  | 5412.2430   |           |
| 311.3945               | -14267.8128 | -1752.2840 | 0.0000      | 0.0000    |
| 7830.4002              | 6031.7198   | 306.2079   | -1798.6804  | 6094.1822 |
| 304.4078               | -59.1684    | -115.9796  | 511540.4688 | -11.1408  |
| -11.1540               |             |            |             |           |
| [11367]ENERGY: 3320000 | 3230.9807   | 5275.1429  | 5443.2523   |           |
| 310.6264               | -14357.9701 | -1624.0779 | 0.0000      | 0.0000    |

## Supplementary Text 6

|                        |             |            |             |           |
|------------------------|-------------|------------|-------------|-----------|
| 7755.2683              | 6033.2226   | 303.2699   | -1722.0456  | 6094.2231 |
| 304.3604               | 42.5149     | -21.5984   | 511540.4688 | -14.1087  |
| -14.0962               |             |            |             |           |
| [11403]ENERGY: 3330000 | 3204.2507   | 5242.5566  | 5453.4539   |           |
| 316.6578               | -14301.9100 | -1740.3543 | 0.0000      | 0.0000    |
| 7856.3118              | 6030.9664   | 307.2212   | -1825.3454  | 6093.8684 |
| 304.7100               | -30.8507    | 46.3760    | 511540.4688 | -15.4727  |
| -15.4795               |             |            |             |           |
| [11453]ENERGY: 3340000 | 3193.4086   | 5382.1266  | 5405.5412   |           |
| 331.9816               | -14346.2289 | -1694.2299 | 0.0000      | 0.0000    |
| 7758.9427              | 6031.5420   | 303.4136   | -1727.4007  | 6096.2458 |
| 304.7125               | 144.9808    | 61.4096    | 511540.4688 | -16.9083  |
| -16.8983               |             |            |             |           |
| [11489]ENERGY: 3350000 | 3321.8699   | 5191.7201  | 5465.0927   |           |
| 317.2155               | -14285.1079 | -1695.1756 | 0.0000      | 0.0000    |
| 7716.6856              | 6032.3003   | 301.7611   | -1684.3853  | 6094.1864 |
| 304.5689               | -63.6194    | -59.8375   | 511540.4688 | -18.7806  |
| -18.7883               |             |            |             |           |
| [11539]ENERGY: 3360000 | 3275.9947   | 5274.3659  | 5425.6651   |           |
| 346.0888               | -14336.8456 | -1763.4927 | 0.0000      | 0.0000    |
| 7810.4307              | 6032.2069   | 305.4270   | -1778.2238  | 6095.7896 |
| 304.5435               | -74.2614    | -39.4713   | 511540.4688 | -16.5631  |
| -16.5669               |             |            |             |           |
| [11575]ENERGY: 3370000 | 3201.3068   | 5308.1272  | 5482.5602   |           |
| 321.4455               | -14291.2762 | -1706.4781 | 0.0000      | 0.0000    |
| 7720.7267              | 6036.4120   | 301.9191   | -1684.3148  | 6096.1052 |
| 304.7711               | 220.3999    | 241.9594   | 511540.4688 | -18.1653  |
| -18.1471               |             |            |             |           |
| [11625]ENERGY: 3380000 | 3258.5812   | 5257.2328  | 5471.3856   |           |
| 341.7156               | -14390.3899 | -1666.9690 | 0.0000      | 0.0000    |
| 7762.3275              | 6033.8838   | 303.5459   | -1728.4437  | 6095.1044 |
| 304.6567               | 193.1679    | 168.8347   | 511540.4688 | -15.7719  |
| -15.7810               |             |            |             |           |
| [11661]ENERGY: 3390000 | 3231.7765   | 5193.1135  | 5486.2674   |           |
| 325.1083               | -14346.0007 | -1748.2396 | 0.0000      | 0.0000    |
| 7892.2669              | 6034.2924   | 308.6272   | -1857.9745  | 6094.2974 |
| 304.7243               | -81.4061    | -114.2481  | 511540.4688 | -16.2279  |
| -16.2460               |             |            |             |           |
| [11714]ENERGY: 3400000 | 3106.9165   | 5261.7553  | 5431.1290   |           |
| 319.2043               | -14390.8532 | -1620.9860 | 0.0000      | 0.0000    |
| 7921.7638              | 6028.9297   | 309.7807   | -1892.8341  | 6094.5689 |
| 304.5812               | 52.7829     | 142.6376   | 511540.4688 | -14.3286  |
| -14.3309               |             |            |             |           |
| [11750]ENERGY: 3410000 | 3240.7891   | 5253.4184  | 5470.9270   |           |
| 346.2109               | -14352.1184 | -1718.6006 | 0.0000      | 0.0000    |
| 7791.8419              | 6032.4684   | 304.7001   | -1759.3735  | 6095.5718 |
| 304.6892               | 11.0507     | -78.5356   | 511540.4688 | -15.3865  |
| -15.3736               |             |            |             |           |
| [11800]ENERGY: 3420000 | 3237.1358   | 5335.2722  | 5461.2842   |           |
| 323.3059               | -14388.9119 | -1726.2760 | 0.0000      | 0.0000    |
| 7792.3621              | 6034.1723   | 304.7204   | -1758.1898  | 6096.0785 |
| 304.8200               | 124.9858    | 24.5569    | 511540.4688 | -16.1089  |
| -16.1157               |             |            |             |           |
| [11836]ENERGY: 3430000 | 3291.2681   | 5295.6316  | 5416.1522   |           |



## Supplementary Text 6

|                        |             |            |             |           |
|------------------------|-------------|------------|-------------|-----------|
| 322.3107               | -14254.8155 | -1767.9474 | 0.0000      | 0.0000    |
| 7731.9722              | 6034.5720   | 302.3589   | -1697.4002  | 6095.5793 |
| 304.6739               | -208.2880   | -193.7004  | 511540.4688 | -17.4405  |
| -17.4291               |             |            |             |           |
| [11886]ENERGY: 3440000 | 3212.8582   | 5289.0632  | 5497.0746   |           |
| 310.1054               | -14286.5291 | -1743.5210 | 0.0000      | 0.0000    |
| 7755.2226              | 6034.2739   | 303.2681   | -1720.9487  | 6095.8127 |
| 304.7151               | -138.8297   | -50.3834   | 511540.4688 | -18.1388  |
| -18.1350               |             |            |             |           |
| [11922]ENERGY: 3450000 | 3226.6828   | 5349.2532  | 5433.6332   |           |
| 314.9677               | -14397.5104 | -1692.3302 | 0.0000      | 0.0000    |
| 7797.1441              | 6031.8405   | 304.9074   | -1765.3036  | 6096.5127 |
| 304.6180               | 91.6110     | 53.4345    | 511540.4688 | -13.9752  |
| -13.9670               |             |            |             |           |
| [11972]ENERGY: 3460000 | 3290.8118   | 5321.4492  | 5430.0776   |           |
| 326.8920               | -14423.7102 | -1696.2120 | 0.0000      | 0.0000    |
| 7784.1824              | 6033.4909   | 304.4006   | -1750.6916  | 6095.8805 |
| 304.9763               | -213.8140   | -232.7198  | 511540.4688 | -13.7851  |
| -13.7944               |             |            |             |           |
| [12008]ENERGY: 3470000 | 3272.4144   | 5293.5317  | 5482.5069   |           |
| 319.2867               | -14400.9948 | -1759.5524 | 0.0000      | 0.0000    |
| 7824.6579              | 6031.8504   | 305.9834   | -1792.8075  | 6096.9193 |
| 304.7772               | -13.5061    | -118.0295  | 511540.4688 | -16.4811  |
| -16.5026               |             |            |             |           |
| [12058]ENERGY: 3480000 | 3197.3915   | 5400.8371  | 5454.6820   |           |
| 326.4001               | -14424.3167 | -1667.6455 | 0.0000      | 0.0000    |
| 7747.2600              | 6034.6086   | 302.9567   | -1712.6514  | 6095.6189 |
| 304.7063               | -59.4071    | -134.9503  | 511540.4688 | -17.7212  |
| -17.7045               |             |            |             |           |
| [12094]ENERGY: 3490000 | 3187.1464   | 5312.6866  | 5519.0332   |           |
| 343.8364               | -14356.5506 | -1711.2605 | 0.0000      | 0.0000    |
| 7738.5954              | 6033.4870   | 302.6179   | -1705.1085  | 6094.7945 |
| 304.6267               | 160.7776    | 34.9624    | 511540.4688 | -12.6834  |
| -12.6721               |             |            |             |           |
| [12147]ENERGY: 3500000 | 3218.9075   | 5254.4858  | 5438.9128   |           |
| 335.1779               | -14322.3218 | -1683.3475 | 0.0000      | 0.0000    |
| 7788.3165              | 6030.1312   | 304.5622   | -1758.1853  | 6095.4045 |
| 304.6128               | 195.9961    | 80.1266    | 511540.4688 | -18.7031  |
| -18.7326               |             |            |             |           |
| [12183]ENERGY: 3510000 | 3199.0516   | 5253.8646  | 5488.4695   |           |
| 341.2870               | -14331.0679 | -1684.5747 | 0.0000      | 0.0000    |
| 7762.2521              | 6029.2821   | 303.5430   | -1732.9700  | 6096.3771 |
| 304.5960               | -120.2091   | -48.1988   | 511540.4688 | -14.7766  |
| -14.7873               |             |            |             |           |
| [12233]ENERGY: 3520000 | 3209.6106   | 5250.2998  | 5465.9300   |           |
| 317.3421               | -14315.1582 | -1715.1003 | 0.0000      | 0.0000    |
| 7820.3647              | 6033.2888   | 305.8155   | -1787.0760  | 6095.4742 |
| 304.6768               | -34.4189    | -3.4535    | 511540.4688 | -18.8993  |
| -18.8748               |             |            |             |           |
| [12269]ENERGY: 3530000 | 3180.9898   | 5282.3017  | 5450.0020   |           |
| 332.5277               | -14296.3686 | -1743.6929 | 0.0000      | 0.0000    |
| 7826.8260              | 6032.5857   | 306.0682   | -1794.2403  | 6095.5298 |
| 304.4699               | -200.9936   | -147.0321  | 511540.4688 | -12.7182  |
| -12.7161               |             |            |             |           |

## Supplementary Text 6

|                        |             |            |             |           |
|------------------------|-------------|------------|-------------|-----------|
| [12319]ENERGY: 3540000 | 3149.2113   | 5398.3156  | 5425.5003   |           |
| 318.7681               | -14335.3839 | -1687.0958 | 0.0000      | 0.0000    |
| 7763.3084              | 6032.6239   | 303.5843   | -1730.6845  | 6096.8620 |
| 304.5818               | 180.5669    | 104.3605   | 511540.4688 | -14.4855  |
| -14.4816               |             |            |             |           |
| [12355]ENERGY: 3550000 | 3183.4685   | 5336.4174  | 5467.3430   |           |
| 321.7703               | -14395.5411 | -1703.1854 | 0.0000      | 0.0000    |
| 7823.3541              | 6033.6268   | 305.9324   | -1789.7273  | 6097.5489 |
| 304.6958               | -15.6407    | 34.8964    | 511540.4688 | -14.3595  |
| -14.3722               |             |            |             |           |
| [12405]ENERGY: 3560000 | 3186.4544   | 5354.3281  | 5433.5993   |           |
| 301.3120               | -14269.9422 | -1797.3129 | 0.0000      | 0.0000    |
| 7824.1269              | 6032.5656   | 305.9626   | -1791.5613  | 6097.8364 |
| 304.5717               | 1.5419      | -3.5466    | 511540.4688 | -14.8297  |
| -14.8230               |             |            |             |           |
| [12441]ENERGY: 3570000 | 3303.3480   | 5242.8155  | 5505.2848   |           |
| 333.8748               | -14280.6601 | -1784.5816 | 0.0000      | 0.0000    |
| 7715.4570              | 6035.5384   | 301.7131   | -1679.9186  | 6097.3367 |
| 304.5569               | 123.8353    | 68.2819    | 511540.4688 | -15.5728  |
| -15.5543               |             |            |             |           |
| [12491]ENERGY: 3580000 | 3190.2452   | 5339.1967  | 5496.5174   |           |
| 323.5644               | -14367.6538 | -1742.1442 | 0.0000      | 0.0000    |
| 7794.5205              | 6034.2463   | 304.8048   | -1760.2742  | 6097.7782 |
| 304.5695               | 346.2959    | 168.5330   | 511540.4688 | -19.8922  |
| -19.9172               |             |            |             |           |
| [12527]ENERGY: 3590000 | 3255.1868   | 5291.2403  | 5445.8923   |           |
| 312.0435               | -14367.7685 | -1708.5129 | 0.0000      | 0.0000    |
| 7805.6950              | 6033.7765   | 305.2418   | -1771.9184  | 6098.0880 |
| 304.6855               | -82.1159    | -105.0066  | 511540.4688 | -15.9595  |
| -15.9476               |             |            |             |           |
| [12580]ENERGY: 3600000 | 3238.7271   | 5363.1906  | 5485.2268   |           |
| 319.5040               | -14393.2930 | -1654.7048 | 0.0000      | 0.0000    |
| 7677.8229              | 6036.4737   | 300.2414   | -1641.3492  | 6098.9730 |
| 304.6158               | -83.9381    | -154.4156  | 511540.4688 | -18.0178  |
| -18.0124               |             |            |             |           |
| [12616]ENERGY: 3610000 | 3229.5388   | 5333.0067  | 5460.3679   |           |
| 316.8697               | -14245.0826 | -1764.4724 | 0.0000      | 0.0000    |
| 7709.9555              | 6040.1838   | 301.4979   | -1669.7717  | 6099.1380 |
| 304.6213               | -206.0896   | -228.1481  | 511540.4688 | -14.9032  |
| -14.9102               |             |            |             |           |
| [12666]ENERGY: 3620000 | 3271.5631   | 5274.6525  | 5426.1108   |           |
| 304.4020               | -14268.9042 | -1774.0549 | 0.0000      | 0.0000    |
| 7801.4368              | 6035.2061   | 305.0753   | -1766.2307  | 6100.4386 |
| 304.7444               | 93.8593     | -52.2405   | 511540.4688 | -15.5539  |
| -15.5691               |             |            |             |           |
| [12702]ENERGY: 3630000 | 3193.4499   | 5323.1039  | 5475.0071   |           |
| 327.0974               | -14287.9961 | -1729.0807 | 0.0000      | 0.0000    |
| 7739.6365              | 6041.2180   | 302.6586   | -1698.4184  | 6101.3326 |
| 304.5999               | -78.7283    | -100.8746  | 511540.4688 | -18.0263  |
| -17.9919               |             |            |             |           |
| [12752]ENERGY: 3640000 | 3175.1443   | 5307.0746  | 5500.6124   |           |
| 336.6324               | -14299.6989 | -1736.5362 | 0.0000      | 0.0000    |
| 7756.2367              | 6039.4653   | 303.3078   | -1716.7714  | 6101.4641 |
| 304.5509               | 89.3030     | -32.4179   | 511540.4688 | -19.0406  |

Supplementary Text 6

-19.0872  
 [12788]ENERGY: 3650000      3316.3269      5280.9054      5431.1416  
 314.5743      -14375.0332      -1763.1693      0.0000      0.0000  
 7834.7342      6039.4799      306.3774      -1795.2543      6100.7994  
 304.8173      -234.6231      -237.8482      511540.4688      -16.4977  
 -16.4729  
 [12838]ENERGY: 3660000      3152.6570      5271.0096      5433.7948  
 323.5701      -14297.3590      -1706.2528      0.0000      0.0000  
 7859.1025      6036.5221      307.3303      -1822.5804      6101.6202  
 304.7591      290.3523      49.4643      511540.4688      -16.4360  
 -16.4393  
 [12874]ENERGY: 3670000      3215.6840      5338.3353      5442.3469  
 300.1567      -14273.7624      -1748.3711      0.0000      0.0000  
 7765.3485      6039.7380      303.6641      -1725.6106      6102.2531  
 304.8076      -84.3547      -143.6728      511540.4688      -19.8074  
 -19.8068  
 [12924]ENERGY: 3680000      3266.3541      5280.0064      5424.0625  
 304.2363      -14373.7516      -1717.6048      0.0000      0.0000  
 7855.7885      6039.0913      307.2007      -1816.6972      6102.5507  
 304.6515      146.6178      -22.6755      511540.4688      -13.7312  
 -13.7264  
 [12960]ENERGY: 3690000      3347.5329      5373.0612      5452.4814  
 313.8357      -14420.1793      -1724.3595      0.0000      0.0000  
 7696.2351      6038.6075      300.9614      -1657.6276      6102.1548  
 304.9514      -229.2076      -78.3263      511540.4688      -13.8499  
 -13.8245  
 [13013]ENERGY: 3700000      3164.0331      5329.9410      5416.9367  
 335.1205      -14303.7391      -1729.0253      0.0000      0.0000  
 7826.3516      6039.6184      306.0496      -1786.7332      6103.1672  
 304.8494      -225.1320      -263.9273      511540.4688      -17.7098  
 -17.7508  
 [13049]ENERGY: 3710000      3241.1207      5269.0823      5455.4464  
 308.7878      -14355.3660      -1713.5573      0.0000      0.0000  
 7837.7323      6043.2463      306.4946      -1794.4860      6103.2036  
 304.7969      -11.5795      -86.2053      511540.4688      -16.7656  
 -16.7492  
 [13099]ENERGY: 3720000      3245.1146      5263.1865      5495.3218  
 314.4798      -14256.2063      -1746.4748      0.0000      0.0000  
 7727.0569      6042.4785      302.1667      -1684.5784      6102.3572  
 305.0085      -57.8134      -129.3978      511540.4688      -18.5353  
 -18.5346  
 [13135]ENERGY: 3730000      3173.5248      5238.9057      5431.4826  
 329.4970      -14356.1239      -1649.1469      0.0000      0.0000  
 7870.6982      6038.8375      307.7838      -1831.8607      6102.7786  
 304.8622      146.7864      105.5262      511540.4688      -17.6419  
 -17.6354  
 [13185]ENERGY: 3740000      3234.3303      5344.7636      5460.5033  
 302.1348      -14333.1605      -1709.4016      0.0000      0.0000  
 7743.1951      6042.3651      302.7978      -1700.8301      6104.4860  
 304.8832      -73.1324      -29.9243      511540.4688      -17.3481  
 -17.3618  
 [13221]ENERGY: 3750000      3244.1081      5375.8949      5437.4895  
 331.3818      -14347.6416      -1734.9486      0.0000      0.0000  
 7733.7946      6040.0787      302.4302      -1693.7159      6103.8965

## Supplementary Text 6

|                        |             |            |             |           |
|------------------------|-------------|------------|-------------|-----------|
| 304.9139               | 120.8916    | 69.1477    | 511540.4688 | -14.7048  |
| -14.7107               |             |            |             |           |
| [13271]ENERGY: 3760000 | 3272.8144   | 5330.8358  | 5460.5300   |           |
| 314.1860               | -14379.6884 | -1726.4385 | 0.0000      | 0.0000    |
| 7770.1153              | 6042.3547   | 303.8505   | -1727.7607  | 6103.9158 |
| 304.8883               | 132.5079    | 75.2770    | 511540.4688 | -19.4888  |
| -19.4683               |             |            |             |           |
| [13307]ENERGY: 3770000 | 3221.0599   | 5297.4273  | 5472.2724   |           |
| 301.3866               | -14403.9579 | -1659.8687 | 0.0000      | 0.0000    |
| 7812.8260              | 6041.1456   | 305.5207   | -1771.6804  | 6104.6177 |
| 304.8222               | 89.7574     | 2.8651     | 511540.4688 | -16.6052  |
| -16.6105               |             |            |             |           |
| [13357]ENERGY: 3780000 | 3211.6839   | 5282.3852  | 5465.9953   |           |
| 308.4880               | -14366.7091 | -1698.0698 | 0.0000      | 0.0000    |
| 7839.1672              | 6042.9405   | 306.5508   | -1796.2266  | 6105.3022 |
| 304.6270               | -87.9183    | -133.5604  | 511540.4688 | -15.6588  |
| -15.6381               |             |            |             |           |
| [13393]ENERGY: 3790000 | 3200.1729   | 5322.5139  | 5436.6080   |           |
| 322.3042               | -14343.2883 | -1668.7442 | 0.0000      | 0.0000    |
| 7771.9385              | 6041.5049   | 303.9218   | -1730.4335  | 6104.2827 |
| 304.6214               | -4.0044     | -99.3550   | 511540.4688 | -12.9045  |
| -12.9292               |             |            |             |           |
| [13446]ENERGY: 3800000 | 3234.8785   | 5269.3944  | 5437.1092   |           |
| 343.3883               | -14323.6537 | -1714.2851 | 0.0000      | 0.0000    |
| 7792.5095              | 6039.3412   | 304.7262   | -1753.1684  | 6105.5557 |
| 304.6369               | 1.1811      | -140.5981  | 511540.4688 | -16.0771  |
| -16.0934               |             |            |             |           |
| [13482]ENERGY: 3810000 | 3204.0501   | 5265.6355  | 5463.8312   |           |
| 317.5053               | -14309.6710 | -1695.4639 | 0.0000      | 0.0000    |
| 7798.8850              | 6044.7723   | 304.9755   | -1754.1127  | 6105.0251 |
| 304.5877               | 97.3170     | 0.0416     | 511540.4688 | -16.7469  |
| -16.7520               |             |            |             |           |
| [13532]ENERGY: 3820000 | 3163.7659   | 5280.7795  | 5447.8729   |           |
| 321.4180               | -14341.9129 | -1727.4627 | 0.0000      | 0.0000    |
| 7895.9092              | 6040.3699   | 308.7696   | -1855.5393  | 6105.8524 |
| 304.7612               | 253.0449    | 174.9963   | 511540.4688 | -15.0944  |
| -15.0825               |             |            |             |           |
| [13568]ENERGY: 3830000 | 3222.1465   | 5365.5070  | 5488.7118   |           |
| 304.5399               | -14399.2754 | -1680.3957 | 0.0000      | 0.0000    |
| 7741.9809              | 6043.2150   | 302.7503   | -1698.7659  | 6106.2826 |
| 304.9238               | 159.3837    | 27.6903    | 511540.4688 | -20.9061  |
| -20.8987               |             |            |             |           |
| [13618]ENERGY: 3840000 | 3181.7001   | 5267.1485  | 5435.7172   |           |
| 327.5227               | -14245.1504 | -1702.6049 | 0.0000      | 0.0000    |
| 7779.0827              | 6043.4158   | 304.2011   | -1735.6669  | 6106.8852 |
| 304.9208               | 35.1557     | 40.1344    | 511540.4688 | -15.1769  |
| -15.1659               |             |            |             |           |
| [13654]ENERGY: 3850000 | 3265.7811   | 5344.1621  | 5470.9232   |           |
| 317.3425               | -14389.9470 | -1730.7068 | 0.0000      | 0.0000    |
| 7765.3782              | 6042.9333   | 303.6652   | -1722.4449  | 6106.9205 |
| 304.9505               | 66.3141     | -73.7999   | 511540.4688 | -13.0837  |
| -13.1064               |             |            |             |           |
| [13704]ENERGY: 3860000 | 3188.5959   | 5398.3075  | 5535.3896   |           |
| 324.4968               | -14412.6669 | -1748.6388 | 0.0000      | 0.0000    |

## Supplementary Text 6

|                        |             |            |             |           |
|------------------------|-------------|------------|-------------|-----------|
| 7756.2093              | 6041.6933   | 303.3067   | -1714.5160  | 6105.4933 |
| 304.8843               | -77.7237    | -50.6021   | 511540.4688 | -17.1117  |
| -17.0931               |             |            |             |           |
| [13740]ENERGY: 3870000 | 3244.0213   | 5289.4085  | 5474.7649   |           |
| 305.8276               | -14343.8683 | -1716.6746 | 0.0000      | 0.0000    |
| 7788.6516              | 6042.1311   | 304.5753   | -1746.5205  | 6106.2744 |
| 305.0747               | -149.1716   | -168.8591  | 511540.4688 | -16.3273  |
| -16.3164               |             |            |             |           |
| [13790]ENERGY: 3880000 | 3112.1414   | 5281.3937  | 5431.5599   |           |
| 317.5189               | -14281.8948 | -1701.6852 | 0.0000      | 0.0000    |
| 7881.0366              | 6040.0705   | 308.1881   | -1840.9661  | 6105.3154 |
| 305.0581               | 52.5539     | 112.5526   | 511540.4688 | -16.0734  |
| -16.0734               |             |            |             |           |
| [13826]ENERGY: 3890000 | 3240.7024   | 5313.7190  | 5412.5119   |           |
| 332.4084               | -14298.7852 | -1801.2719 | 0.0000      | 0.0000    |
| 7842.5170              | 6041.8016   | 306.6817   | -1800.7154  | 6104.3498 |
| 304.8789               | -47.7958    | -122.6504  | 511540.4688 | -18.1857  |
| -18.2006               |             |            |             |           |
| [13879]ENERGY: 3900000 | 3205.9211   | 5335.4002  | 5437.7825   |           |
| 327.4068               | -14312.3380 | -1779.5979 | 0.0000      | 0.0000    |
| 7826.8077              | 6041.3824   | 306.0674   | -1785.4252  | 6105.2561 |
| 305.1838               | -43.7734    | -54.9622   | 511540.4688 | -15.4968  |
| -15.4865               |             |            |             |           |
| [13915]ENERGY: 3910000 | 3221.5922   | 5281.5235  | 5474.8497   |           |
| 315.4105               | -14380.6032 | -1756.8333 | 0.0000      | 0.0000    |
| 7881.2937              | 6037.2332   | 308.1981   | -1844.0605  | 6104.8590 |
| 305.0496               | 93.0616     | -9.1839    | 511540.4688 | -18.7700  |
| -18.7889               |             |            |             |           |
| [13965]ENERGY: 3920000 | 3212.2015   | 5272.8724  | 5453.9419   |           |
| 312.7952               | -14306.0650 | -1706.9192 | 0.0000      | 0.0000    |
| 7802.2066              | 6041.0334   | 305.1054   | -1761.1733  | 6104.3188 |
| 304.9030               | 43.3344     | -10.3164   | 511540.4688 | -19.3050  |
| -19.2964               |             |            |             |           |
| [14001]ENERGY: 3930000 | 3258.1127   | 5325.3350  | 5517.4148   |           |
| 327.5451               | -14392.1867 | -1682.7003 | 0.0000      | 0.0000    |
| 7687.4675              | 6040.9882   | 300.6185   | -1646.4794  | 6103.8777 |
| 304.7935               | -191.6788   | -35.5749   | 511540.4688 | -14.5842  |
| -14.5868               |             |            |             |           |
| [14051]ENERGY: 3940000 | 3224.4893   | 5323.5030  | 5463.3168   |           |
| 315.2616               | -14343.7456 | -1706.9612 | 0.0000      | 0.0000    |
| 7765.0711              | 6040.9351   | 303.6532   | -1724.1360  | 6104.5119 |
| 304.8596               | -355.7286   | -256.2187  | 511540.4688 | -18.0095  |
| -17.9904               |             |            |             |           |
| [14087]ENERGY: 3950000 | 3174.7925   | 5322.1698  | 5441.4253   |           |
| 331.3758               | -14431.2449 | -1635.1522 | 0.0000      | 0.0000    |
| 7835.3157              | 6038.6820   | 306.4001   | -1796.6337  | 6104.4742 |
| 304.9031               | 60.9676     | 115.2386   | 511540.4688 | -13.9612  |
| -13.9787               |             |            |             |           |
| [14137]ENERGY: 3960000 | 3250.8142   | 5313.0723  | 5483.9305   |           |
| 305.8924               | -14326.9758 | -1732.8370 | 0.0000      | 0.0000    |
| 7745.9695              | 6039.8661   | 302.9063   | -1706.1034  | 6105.3416 |
| 305.0132               | -5.8594     | 53.4876    | 511540.4688 | -15.5005  |
| -15.4762               |             |            |             |           |
| [14173]ENERGY: 3970000 | 3181.4626   | 5276.2588  | 5460.5575   |           |

## Supplementary Text 6

|                        |             |            |             |           |
|------------------------|-------------|------------|-------------|-----------|
| 315.9443               | -14324.5218 | -1741.2843 | 0.0000      | 0.0000    |
| 7873.3418              | 6041.7588   | 307.8872   | -1831.5830  | 6105.6194 |
| 304.9395               | -16.1964    | -135.1479  | 511540.4688 | -15.2547  |
| -15.2942               |             |            |             |           |
| [14223]ENERGY: 3980000 | 3207.9900   | 5423.9294  | 5464.0428   |           |
| 311.9534               | -14301.0898 | -1743.7075 | 0.0000      | 0.0000    |
| 7682.8599              | 6045.9782   | 300.4384   | -1636.8817  | 6106.7216 |
| 304.9447               | 89.6688     | 11.3344    | 511540.4688 | -11.9672  |
| -11.9538               |             |            |             |           |
| [14259]ENERGY: 3990000 | 3249.4694   | 5360.2744  | 5426.0072   |           |
| 303.3590               | -14347.7135 | -1738.3571 | 0.0000      | 0.0000    |
| 7792.4188              | 6045.4581   | 304.7227   | -1746.9607  | 6106.4783 |
| 304.9144               | -13.3583    | -103.5156  | 511540.4688 | -11.6405  |
| -11.6516               |             |            |             |           |
| [14312]ENERGY: 4000000 | 3221.3080   | 5257.6159  | 5488.0306   |           |
| 338.1267               | -14314.7887 | -1712.0553 | 0.0000      | 0.0000    |
| 7768.8082              | 6047.0454   | 303.7994   | -1721.7628  | 6107.9048 |
| 304.8248               | 192.8945    | 69.6412    | 511540.4688 | -13.9610  |
| -13.9725               |             |            |             |           |
| [14348]ENERGY: 4010000 | 3253.3165   | 5355.8803  | 5401.2360   |           |
| 331.4850               | -14328.8508 | -1762.1601 | 0.0000      | 0.0000    |
| 7793.5111              | 6044.4179   | 304.7654   | -1749.0932  | 6107.5523 |
| 304.8692               | -109.1446   | -166.2865  | 511540.4688 | -19.0620  |
| -19.0091               |             |            |             |           |
| [14398]ENERGY: 4020000 | 3221.9139   | 5357.3869  | 5505.8188   |           |
| 317.1618               | -14336.3177 | -1788.3619 | 0.0000      | 0.0000    |
| 7764.4576              | 6042.0594   | 303.6292   | -1722.3983  | 6106.2110 |
| 305.1061               | -88.4895    | -70.1379   | 511540.4688 | -9.7386   |
| -9.7683                |             |            |             |           |
| [14434]ENERGY: 4030000 | 3211.6380   | 5332.7649  | 5490.6250   |           |
| 331.1660               | -14369.1378 | -1740.7644 | 0.0000      | 0.0000    |
| 7784.6011              | 6040.8928   | 304.4169   | -1743.7083  | 6106.8672 |
| 305.1361               | 55.1513     | 43.1252    | 511540.4688 | -12.4017  |
| -12.3947               |             |            |             |           |
| [14484]ENERGY: 4040000 | 3105.7959   | 5270.7942  | 5509.7589   |           |
| 310.4960               | -14331.8377 | -1651.0775 | 0.0000      | 0.0000    |
| 7830.4347              | 6044.3646   | 306.2093   | -1786.0702  | 6106.2995 |
| 305.1181               | 146.3992    | 127.4942   | 511540.4688 | -11.6705  |
| -11.6638               |             |            |             |           |
| [14520]ENERGY: 4050000 | 3230.9994   | 5373.0334  | 5504.9328   |           |
| 308.4876               | -14466.0705 | -1698.2602 | 0.0000      | 0.0000    |
| 7785.7806              | 6038.9031   | 304.4631   | -1746.8775  | 6107.0072 |
| 304.9504               | 44.0769     | 60.4280    | 511540.4688 | -13.8025  |
| -13.8184               |             |            |             |           |
| [14570]ENERGY: 4060000 | 3195.3970   | 5305.7890  | 5479.8091   |           |
| 338.3509               | -14283.5785 | -1728.7342 | 0.0000      | 0.0000    |
| 7736.2545              | 6043.2877   | 302.5264   | -1692.9668  | 6106.7191 |
| 304.8002               | 7.8107      | -118.7212  | 511540.4688 | -11.7356  |
| -11.7378               |             |            |             |           |
| [14606]ENERGY: 4070000 | 3205.0210   | 5310.4382  | 5491.7955   |           |
| 291.2390               | -14228.9133 | -1769.8582 | 0.0000      | 0.0000    |
| 7746.4896              | 6046.2118   | 302.9266   | -1700.2778  | 6107.3226 |
| 304.7227               | 36.7560     | -3.0717    | 511540.4688 | -13.3803  |
| -13.3718               |             |            |             |           |

## Supplementary Text 6

|                        |             |            |             |           |
|------------------------|-------------|------------|-------------|-----------|
| [14656]ENERGY: 4080000 | 3190.2017   | 5298.0378  | 5487.2337   |           |
| 320.8098               | -14376.6216 | -1701.6344 | 0.0000      | 0.0000    |
| 7822.9165              | 6040.9435   | 305.9153   | -1781.9730  | 6107.6976 |
| 304.6738               | 197.8097    | 78.3379    | 511540.4688 | -14.9803  |
| -14.9759               |             |            |             |           |
| [14692]ENERGY: 4090000 | 3235.4107   | 5317.8195  | 5490.9406   |           |
| 332.7188               | -14384.7916 | -1694.8545 | 0.0000      | 0.0000    |
| 7749.0775              | 6046.3209   | 303.0278   | -1702.7566  | 6107.9149 |
| 304.8615               | 39.0645     | 33.6472    | 511540.4688 | -14.1765  |
| -14.1761               |             |            |             |           |
| [14745]ENERGY: 4100000 | 3266.4135   | 5373.8107  | 5483.4338   |           |
| 313.7750               | -14288.0607 | -1796.0966 | 0.0000      | 0.0000    |
| 7694.3402              | 6047.6159   | 300.8873   | -1646.7243  | 6108.4911 |
| 304.8309               | -214.8144   | -140.0010  | 511540.4688 | -12.4019  |
| -12.4104               |             |            |             |           |
| [14781]ENERGY: 4110000 | 3224.0547   | 5366.0078  | 5455.1705   |           |
| 339.9823               | -14438.6654 | -1703.8915 | 0.0000      | 0.0000    |
| 7802.1386              | 6044.7970   | 305.1028   | -1757.3416  | 6107.9466 |
| 304.9208               | 291.1732    | 224.0529   | 511540.4688 | -14.6935  |
| -14.6930               |             |            |             |           |
| [14831]ENERGY: 4120000 | 3206.3283   | 5214.5938  | 5491.2014   |           |
| 310.7916               | -14253.7622 | -1689.1693 | 0.0000      | 0.0000    |
| 7762.8937              | 6042.8773   | 303.5681   | -1720.0164  | 6106.9932 |
| 304.7254               | 35.7586     | 2.9024     | 511540.4688 | -17.2325  |
| -17.2373               |             |            |             |           |
| [14867]ENERGY: 4130000 | 3167.2036   | 5275.9937  | 5437.3315   |           |
| 326.6114               | -14258.8524 | -1702.0314 | 0.0000      | 0.0000    |
| 7799.2524              | 6045.5089   | 304.9899   | -1753.7435  | 6107.3508 |
| 304.8255               | -44.6756    | -122.9925  | 511540.4688 | -13.7748  |
| -13.7835               |             |            |             |           |
| [14917]ENERGY: 4140000 | 3232.8894   | 5353.5918  | 5392.4107   |           |
| 322.1997               | -14334.2537 | -1687.5283 | 0.0000      | 0.0000    |
| 7761.6093              | 6040.9190   | 303.5179   | -1720.6903  | 6108.1705 |
| 304.7523               | -47.8917    | 24.0598    | 511540.4688 | -17.6431  |
| -17.6043               |             |            |             |           |
| [14953]ENERGY: 4150000 | 3257.4980   | 5235.5452  | 5528.5946   |           |
| 351.1694               | -14279.9401 | -1804.4494 | 0.0000      | 0.0000    |
| 7757.4451              | 6045.8627   | 303.3550   | -1711.5824  | 6107.9944 |
| 304.9262               | -396.8850   | -255.3032  | 511540.4688 | -17.4271  |
| -17.4478               |             |            |             |           |
| [15003]ENERGY: 4160000 | 3187.0449   | 5215.9923  | 5441.2436   |           |
| 322.0258               | -14336.7916 | -1680.0432 | 0.0000      | 0.0000    |
| 7893.2689              | 6042.7407   | 308.6664   | -1850.5283  | 6109.1161 |
| 304.7131               | 90.5120     | -2.2436    | 511540.4688 | -18.8066  |
| -18.8219               |             |            |             |           |
| [15039]ENERGY: 4170000 | 3245.9220   | 5240.5398  | 5522.1001   |           |
| 304.4061               | -14355.0204 | -1684.9406 | 0.0000      | 0.0000    |
| 7772.0086              | 6045.0157   | 303.9245   | -1726.9929  | 6108.7056 |
| 304.7303               | 48.3822     | 8.6909     | 511540.4688 | -18.0779  |
| -18.0675               |             |            |             |           |
| [15089]ENERGY: 4180000 | 3207.6910   | 5357.8875  | 5425.0980   |           |
| 310.9402               | -14245.0859 | -1791.8747 | 0.0000      | 0.0000    |
| 7781.1154              | 6045.7715   | 304.2806   | -1735.3439  | 6109.0956 |
| 305.0744               | -59.5847    | -46.2728   | 511540.4688 | -17.1455  |

Supplementary Text 6

-17.1453  
 [15125]ENERGY: 4190000 3252.3789 5336.9573 5453.2567  
 293.9923 -14347.1297 -1761.2554 0.0000 0.0000  
 7814.7364 6042.9365 305.5954 -1771.7998 6110.6296  
 304.9925 -62.9059 -82.4478 511540.4688 -17.8260  
 -17.8292  
 [15178]ENERGY: 4200000 3276.5543 5231.9229 5426.0808  
 316.5269 -14291.6067 -1779.2480 0.0000 0.0000  
 7864.7512 6044.9815 307.5512 -1819.7697 6109.3312  
 305.0352 -115.3457 -168.7040 511540.4688 -17.5207  
 -17.5117  
 [15214]ENERGY: 4210000 3217.7588 5292.9010 5464.0416  
 329.2153 -14377.2936 -1651.1967 0.0000 0.0000  
 7770.8251 6046.2516 303.8782 -1724.5736 6109.2023  
 304.8666 123.9648 88.7612 511540.4688 -18.4293  
 -18.4099  
 [15264]ENERGY: 4220000 3170.9750 5202.1557 5504.7149  
 335.4599 -14314.5732 -1699.7720 0.0000 0.0000  
 7848.5246 6047.4848 306.9167 -1801.0398 6109.0546  
 304.8412 205.6385 8.9286 511540.4688 -11.8030  
 -11.8239  
 [15300]ENERGY: 4230000 3226.3041 5329.4777 5445.1563  
 325.9914 -14371.4903 -1727.6265 0.0000 0.0000  
 7815.1514 6042.9640 305.6116 -1772.1873 6109.6265  
 304.7938 162.5627 68.1878 511540.4688 -22.8964  
 -22.9015  
 [15350]ENERGY: 4240000 3118.4838 5279.3645 5508.4310  
 310.6429 -14306.9028 -1663.3680 0.0000 0.0000  
 7799.7313 6046.3827 305.0086 -1753.3486 6110.2954  
 304.8211 67.0823 -18.3613 511540.4688 -18.5287  
 -18.5294  
 [15386]ENERGY: 4250000 3155.5841 5255.1729 5473.4878  
 332.0224 -14343.3267 -1704.3345 0.0000 0.0000  
 7874.1990 6042.8050 307.9207 -1831.3940 6109.2178  
 304.8462 14.4453 29.3422 511540.4688 -15.2624  
 -15.2648  
 [15436]ENERGY: 4260000 3240.2302 5308.2759 5445.3540  
 317.2974 -14277.7751 -1775.0374 0.0000 0.0000  
 7789.7480 6048.0931 304.6182 -1741.6549 6110.8832  
 304.7821 -196.7982 -221.2930 511540.4688 -15.9699  
 -15.9708  
 [15472]ENERGY: 4270000 3210.5135 5340.8061 5478.8756  
 324.7293 -14372.9301 -1717.8491 0.0000 0.0000  
 7783.5842 6047.7294 304.3772 -1735.8548 6110.5572  
 304.8626 -236.1865 -170.8471 511540.4688 -12.6144  
 -12.6028  
 [15522]ENERGY: 4280000 3256.6675 5250.4328 5473.5519  
 326.8754 -14266.6871 -1749.3668 0.0000 0.0000  
 7757.5827 6049.0563 303.3604 -1708.5264 6110.8329  
 304.9798 -37.3740 11.0951 511540.4688 -19.3815  
 -19.3796  
 [15558]ENERGY: 4290000 3204.1496 5248.2137 5458.0568  
 321.2884 -14199.9284 -1777.7390 0.0000 0.0000  
 7794.3373 6048.3783 304.7977 -1745.9590 6110.8248



## Supplementary Text 6

|                        |             |            |             |           |
|------------------------|-------------|------------|-------------|-----------|
| 305.1394               | -261.7339   | -190.9515  | 511540.4688 | -15.6733  |
| -15.6856               |             |            |             |           |
| [15611]ENERGY: 4300000 | 3228.5093   | 5348.3264  | 5446.3816   |           |
| 320.6529               | -14387.0008 | -1720.7417 | 0.0000      | 0.0000    |
| 7810.7638              | 6046.8915   | 305.4400   | -1763.8723  | 6110.9748 |
| 304.9877               | -122.1982   | -69.5901   | 511540.4688 | -20.1380  |
| -20.1137               |             |            |             |           |
| [15647]ENERGY: 4310000 | 3286.4770   | 5295.1806  | 5502.0276   |           |
| 328.1017               | -14339.8611 | -1740.9291 | 0.0000      | 0.0000    |
| 7718.9074              | 6049.9041   | 301.8480   | -1669.0033  | 6111.5184 |
| 305.1233               | -102.6735   | -93.4922   | 511540.4688 | -15.5484  |
| -15.5620               |             |            |             |           |
| [15697]ENERGY: 4320000 | 3229.8581   | 5344.9957  | 5448.0841   |           |
| 311.0696               | -14399.3230 | -1722.6315 | 0.0000      | 0.0000    |
| 7836.6012              | 6048.6542   | 306.4504   | -1787.9470  | 6111.5824 |
| 305.2727               | -75.5253    | -62.2509   | 511540.4688 | -14.5869  |
| -14.6035               |             |            |             |           |
| [15733]ENERGY: 4330000 | 3280.9280   | 5263.6269  | 5454.6852   |           |
| 322.9161               | -14391.1962 | -1683.9384 | 0.0000      | 0.0000    |
| 7803.9443              | 6050.9659   | 305.1734   | -1752.9784  | 6111.0765 |
| 305.0121               | 44.9705     | 0.1446     | 511540.4688 | -16.7444  |
| -16.7642               |             |            |             |           |
| [15783]ENERGY: 4340000 | 3261.2792   | 5311.5768  | 5465.8961   |           |
| 306.3797               | -14361.8059 | -1679.1497 | 0.0000      | 0.0000    |
| 7744.5129              | 6048.6891   | 302.8493   | -1695.8237  | 6112.3388 |
| 304.8076               | -18.9134    | 16.9048    | 511540.4688 | -15.5086  |
| -15.4616               |             |            |             |           |
| [15819]ENERGY: 4350000 | 3208.5356   | 5410.9791  | 5443.1569   |           |
| 336.8104               | -14380.8583 | -1722.6914 | 0.0000      | 0.0000    |
| 7755.7701              | 6051.7024   | 303.2895   | -1704.0677  | 6111.9309 |
| 305.0093               | -77.0575    | -83.1712   | 511540.4688 | -15.9258  |
| -15.9425               |             |            |             |           |
| [15869]ENERGY: 4360000 | 3293.1155   | 5372.7433  | 5477.6466   |           |
| 331.6495               | -14364.3308 | -1730.4295 | 0.0000      | 0.0000    |
| 7672.5284              | 6052.9229   | 300.0343   | -1619.6055  | 6113.0658 |
| 305.0876               | -67.4447    | -152.8898  | 511540.4688 | -17.3480  |
| -17.3462               |             |            |             |           |
| [15905]ENERGY: 4370000 | 3277.3704   | 5291.1950  | 5479.9263   |           |
| 321.8807               | -14367.5384 | -1737.2675 | 0.0000      | 0.0000    |
| 7787.3265              | 6052.8930   | 304.5235   | -1734.4335  | 6113.4355 |
| 305.0404               | -24.9622    | -49.5116   | 511540.4688 | -15.5782  |
| -15.5703               |             |            |             |           |
| [15955]ENERGY: 4380000 | 3182.9191   | 5410.9194  | 5375.6577   |           |
| 340.3779               | -14364.2119 | -1708.8569 | 0.0000      | 0.0000    |
| 7809.7741              | 6046.5794   | 305.4013   | -1763.1947  | 6112.8037 |
| 304.9971               | -117.4058   | -57.6681   | 511540.4688 | -17.3778  |
| -17.3907               |             |            |             |           |
| [15991]ENERGY: 4390000 | 3331.3627   | 5251.6732  | 5466.7838   |           |
| 344.1015               | -14437.5070 | -1659.4373 | 0.0000      | 0.0000    |
| 7751.8965              | 6048.8734   | 303.1380   | -1703.0231  | 6112.4462 |
| 305.1115               | -7.2832     | 26.2438    | 511540.4688 | -16.5232  |
| -16.4857               |             |            |             |           |
| [16044]ENERGY: 4400000 | 3262.4413   | 5301.9537  | 5468.5678   |           |
| 325.1835               | -14394.3204 | -1695.7439 | 0.0000      | 0.0000    |

## Supplementary Text 6

|                        |             |            |             |           |
|------------------------|-------------|------------|-------------|-----------|
| 7782.6034              | 6050.6855   | 304.3388   | -1731.9179  | 6112.9478 |
| 305.0767               | -172.7036   | -153.9021  | 511540.4688 | -18.1718  |
| -18.2000               |             |            |             |           |
| [16080]ENERGY: 4410000 | 3322.4492   | 5305.8563  | 5509.8008   |           |
| 319.9046               | -14467.8443 | -1723.1299 | 0.0000      | 0.0000    |
| 7780.4211              | 6047.4578   | 304.2535   | -1732.9633  | 6112.9274 |
| 304.9860               | -180.5874   | -153.3815  | 511540.4688 | -15.7949  |
| -15.8028               |             |            |             |           |
| [16130]ENERGY: 4420000 | 3262.6929   | 5364.5464  | 5443.7195   |           |
| 319.7871               | -14295.5684 | -1803.9686 | 0.0000      | 0.0000    |
| 7759.6671              | 6050.8759   | 303.4419   | -1708.7911  | 6112.2531 |
| 304.8818               | -281.2951   | -202.0532  | 511540.4688 | -15.1634  |
| -15.1455               |             |            |             |           |
| [16166]ENERGY: 4430000 | 3217.2363   | 5270.9077  | 5397.0106   |           |
| 330.1983               | -14383.5727 | -1693.3322 | 0.0000      | 0.0000    |
| 7908.0274              | 6046.4755   | 309.2435   | -1861.5519  | 6112.7661 |
| 305.0188               | 190.7688    | 59.8016    | 511540.4688 | -12.0850  |
| -12.1066               |             |            |             |           |
| [16216]ENERGY: 4440000 | 3258.2154   | 5309.6992  | 5444.3012   |           |
| 337.5371               | -14346.7560 | -1689.2375 | 0.0000      | 0.0000    |
| 7735.0798              | 6048.8393   | 302.4804   | -1686.2406  | 6113.0441 |
| 304.9570               | 96.4212     | 9.0901     | 511540.4688 | -12.6337  |
| -12.6284               |             |            |             |           |
| [16252]ENERGY: 4450000 | 3289.6310   | 5196.9181  | 5434.4819   |           |
| 338.9314               | -14321.1221 | -1715.8746 | 0.0000      | 0.0000    |
| 7828.0347              | 6051.0005   | 306.1154   | -1777.0343  | 6113.3526 |
| 305.0953               | -141.9796   | -214.9004  | 511540.4688 | -13.2179  |
| -13.2061               |             |            |             |           |
| [16302]ENERGY: 4460000 | 3171.5415   | 5246.4549  | 5474.6183   |           |
| 343.9074               | -14299.2684 | -1710.2831 | 0.0000      | 0.0000    |
| 7823.4543              | 6050.4249   | 305.9363   | -1773.0294  | 6113.6672 |
| 305.0015               | -34.1161    | 2.2830     | 511540.4688 | -11.6412  |
| -11.6557               |             |            |             |           |
| [16338]ENERGY: 4470000 | 3231.4817   | 5397.4529  | 5442.8342   |           |
| 347.0312               | -14482.8842 | -1645.5549 | 0.0000      | 0.0000    |
| 7760.3296              | 6050.6905   | 303.4678   | -1709.6391  | 6113.0131 |
| 304.9673               | 75.7188     | 83.8012    | 511540.4688 | -13.2550  |
| -13.2387               |             |            |             |           |
| [16388]ENERGY: 4480000 | 3284.4539   | 5322.3553  | 5459.6738   |           |
| 323.9502               | -14402.5406 | -1719.0695 | 0.0000      | 0.0000    |
| 7782.1442              | 6050.9674   | 304.3209   | -1731.1768  | 6114.5475 |
| 304.9946               | 103.4072    | 16.1197    | 511540.4688 | -12.2681  |
| -12.2934               |             |            |             |           |
| [16424]ENERGY: 4490000 | 3218.0272   | 5281.2354  | 5482.8363   |           |
| 314.4219               | -14319.2447 | -1709.0550 | 0.0000      | 0.0000    |
| 7783.1109              | 6051.3319   | 304.3587   | -1731.7790  | 6113.9163 |
| 305.1078               | -91.7432    | 8.2668     | 511540.4688 | -18.5195  |
| -18.4995               |             |            |             |           |
| [16477]ENERGY: 4500000 | 3202.9722   | 5186.8873  | 5456.8396   |           |
| 333.2284               | -14299.4874 | -1683.7168 | 0.0000      | 0.0000    |
| 7855.0370              | 6051.7602   | 307.1713   | -1803.2768  | 6114.0166 |
| 305.0046               | 109.7143    | 82.8695    | 511540.4688 | -13.4526  |
| -13.4717               |             |            |             |           |
| [16513]ENERGY: 4510000 | 3260.4663   | 5324.4830  | 5481.3362   |           |

## Supplementary Text 6

|                        |             |            |             |           |
|------------------------|-------------|------------|-------------|-----------|
| 315.4182               | -14357.3861 | -1705.4070 | 0.0000      | 0.0000    |
| 7734.0130              | 6052.9237   | 302.4387   | -1681.0894  | 6113.7718 |
| 304.9343               | -156.4552   | -62.5472   | 511540.4688 | -15.7777  |
| -15.7597               |             |            |             |           |
| [16563]ENERGY: 4520000 | 3264.9659   | 5350.6132  | 5437.6592   |           |
| 318.3735               | -14365.8480 | -1707.7417 | 0.0000      | 0.0000    |
| 7753.1181              | 6051.1401   | 303.1858   | -1701.9780  | 6114.2550 |
| 304.9952               | 75.0022     | -14.9491   | 511540.4688 | -13.1636  |
| -13.1960               |             |            |             |           |
| [16599]ENERGY: 4530000 | 3177.2010   | 5294.0371  | 5434.4621   |           |
| 325.7982               | -14308.4958 | -1684.0160 | 0.0000      | 0.0000    |
| 7810.9529              | 6049.9395   | 305.4474   | -1761.0134  | 6113.8213 |
| 304.8392               | 257.7271    | 140.6676   | 511540.4688 | -15.2643  |
| -15.2457               |             |            |             |           |
| [16649]ENERGY: 4540000 | 3208.9360   | 5363.0702  | 5483.7458   |           |
| 306.7412               | -14370.2924 | -1672.0298 | 0.0000      | 0.0000    |
| 7734.0149              | 6054.1858   | 302.4388   | -1679.8290  | 6114.8008 |
| 305.0369               | 45.3056     | 34.9928    | 511540.4688 | -10.8769  |
| -10.8717               |             |            |             |           |
| [16685]ENERGY: 4550000 | 3256.9026   | 5356.6349  | 5445.0376   |           |
| 325.9797               | -14255.1327 | -1802.1405 | 0.0000      | 0.0000    |
| 7722.1581              | 6049.4396   | 301.9751   | -1672.7185  | 6113.6770 |
| 305.2341               | 48.6596     | 73.9961    | 511540.4688 | -9.4881   |
| -9.4885                |             |            |             |           |
| [16735]ENERGY: 4560000 | 3225.8854   | 5268.3374  | 5485.0433   |           |
| 322.0760               | -14399.5383 | -1666.0573 | 0.0000      | 0.0000    |
| 7814.0425              | 6049.7890   | 305.5683   | -1764.2534  | 6114.8172 |
| 304.9291               | 94.8874     | 6.8444     | 511540.4688 | -15.2880  |
| -15.2968               |             |            |             |           |
| [16771]ENERGY: 4570000 | 3243.6440   | 5260.7491  | 5480.2840   |           |
| 311.6046               | -14298.8950 | -1748.3248 | 0.0000      | 0.0000    |
| 7801.6440              | 6050.7059   | 305.0834   | -1750.9381  | 6115.0218 |
| 305.1379               | 82.8396     | 9.7093     | 511540.4688 | -9.8372   |
| -9.8577                |             |            |             |           |
| [16821]ENERGY: 4580000 | 3187.2082   | 5316.2309  | 5467.6871   |           |
| 317.1800               | -14416.3071 | -1636.3527 | 0.0000      | 0.0000    |
| 7814.6486              | 6050.2951   | 305.5920   | -1764.3535  | 6114.9611 |
| 305.1575               | 8.5657      | -22.3297   | 511540.4688 | -11.6139  |
| -11.5905               |             |            |             |           |
| [16857]ENERGY: 4590000 | 3239.8028   | 5259.9653  | 5437.6220   |           |
| 315.5869               | -14399.9410 | -1637.9081 | 0.0000      | 0.0000    |
| 7837.6784              | 6052.8062   | 306.4925   | -1784.8721  | 6114.0527 |
| 304.9192               | 96.4527     | 66.4390    | 511540.4688 | -13.9401  |
| -13.9476               |             |            |             |           |
| [16910]ENERGY: 4600000 | 3209.3362   | 5277.3560  | 5413.9113   |           |
| 333.1263               | -14343.0786 | -1656.3181 | 0.0000      | 0.0000    |
| 7820.3599              | 6054.6930   | 305.8153   | -1765.6669  | 6116.1981 |
| 304.7930               | 324.9190    | 112.9312   | 511540.4688 | -15.1239  |
| -15.1255               |             |            |             |           |
| [16946]ENERGY: 4610000 | 3306.4003   | 5255.7689  | 5465.6972   |           |
| 323.9590               | -14357.4607 | -1701.6685 | 0.0000      | 0.0000    |
| 7762.3462              | 6055.0423   | 303.5467   | -1707.3039  | 6114.8942 |
| 304.8848               | 37.1503     | -21.1593   | 511540.4688 | -9.9518   |
| -9.9454                |             |            |             |           |

## Supplementary Text 6

|                        |             |            |             |           |
|------------------------|-------------|------------|-------------|-----------|
| [16996]ENERGY: 4620000 | 3211.8108   | 5313.0377  | 5483.6892   |           |
| 320.3410               | -14408.2208 | -1641.1981 | 0.0000      | 0.0000    |
| 7776.2877              | 6055.7475   | 304.0919   | -1720.5402  | 6115.8600 |
| 304.9264               | 46.2773     | -18.4749   | 511540.4688 | -20.5484  |
| -20.5515               |             |            |             |           |
| [17032]ENERGY: 4630000 | 3195.4630   | 5366.1769  | 5437.4115   |           |
| 314.3812               | -14379.3398 | -1711.5283 | 0.0000      | 0.0000    |
| 7829.0460              | 6051.6106   | 306.1550   | -1777.4354  | 6116.5442 |
| 304.9115               | 17.2656     | -84.9602   | 511540.4688 | -14.2485  |
| -14.2397               |             |            |             |           |
| [17082]ENERGY: 4640000 | 3250.7431   | 5264.8834  | 5440.6344   |           |
| 309.8929               | -14283.7064 | -1700.4872 | 0.0000      | 0.0000    |
| 7773.9154              | 6055.8755   | 303.9991   | -1718.0399  | 6117.9031 |
| 305.0667               | 47.5560     | 12.2894    | 511540.4688 | -13.7427  |
| -13.7344               |             |            |             |           |
| [17118]ENERGY: 4650000 | 3294.7448   | 5306.6951  | 5485.0361   |           |
| 341.5561               | -14402.5135 | -1764.7365 | 0.0000      | 0.0000    |
| 7793.6014              | 6054.3834   | 304.7689   | -1739.2180  | 6116.0494 |
| 305.0187               | -28.4076    | -42.2621   | 511540.4688 | -19.8440  |
| -19.8422               |             |            |             |           |
| [17168]ENERGY: 4660000 | 3233.3653   | 5230.7697  | 5437.8505   |           |
| 319.8298               | -14345.6940 | -1662.5644 | 0.0000      | 0.0000    |
| 7838.8421              | 6052.3990   | 306.5380   | -1786.4431  | 6117.3707 |
| 305.1638               | -120.2821   | -43.7496   | 511540.4688 | -13.9251  |
| -13.9249               |             |            |             |           |
| [17204]ENERGY: 4670000 | 3249.7569   | 5324.5835  | 5425.9617   |           |
| 307.7353               | -14382.1318 | -1721.3374 | 0.0000      | 0.0000    |
| 7847.1828              | 6051.7510   | 306.8642   | -1795.4317  | 6116.6732 |
| 304.9804               | 61.2087     | -27.4070   | 511540.4688 | -12.2498  |
| -12.2487               |             |            |             |           |
| [17254]ENERGY: 4680000 | 3214.1104   | 5358.7463  | 5453.0104   |           |
| 338.0968               | -14431.3015 | -1706.3858 | 0.0000      | 0.0000    |
| 7828.7133              | 6054.9898   | 306.1420   | -1773.7235  | 6117.8405 |
| 305.0077               | 301.3649    | 250.4912   | 511540.4688 | -11.7072  |
| -11.7211               |             |            |             |           |
| [17290]ENERGY: 4690000 | 3176.8080   | 5279.1527  | 5458.8194   |           |
| 345.6315               | -14369.5908 | -1684.1228 | 0.0000      | 0.0000    |
| 7842.2079              | 6048.9060   | 306.6697   | -1793.3019  | 6117.6751 |
| 305.1737               | 215.7876    | 129.8599   | 511540.4688 | -14.4587  |
| -14.4340               |             |            |             |           |
| [17343]ENERGY: 4700000 | 3259.1555   | 5309.3110  | 5450.5277   |           |
| 331.2898               | -14377.3305 | -1720.1398 | 0.0000      | 0.0000    |
| 7802.0835              | 6054.8974   | 305.1006   | -1747.1862  | 6117.4950 |
| 304.9064               | 151.4847    | 147.3636   | 511540.4688 | -11.4604  |
| -11.4735               |             |            |             |           |
| [17379]ENERGY: 4710000 | 3231.5370   | 5311.0254  | 5453.9584   |           |
| 339.4182               | -14459.0106 | -1661.3968 | 0.0000      | 0.0000    |
| 7837.8500              | 6053.3816   | 306.4992   | -1784.4684  | 6118.0175 |
| 305.1961               | 219.5321    | 89.1468    | 511540.4688 | -18.3409  |
| -18.3256               |             |            |             |           |
| [17429]ENERGY: 4720000 | 3233.7984   | 5251.5454  | 5412.0956   |           |
| 318.4195               | -14308.2861 | -1691.0624 | 0.0000      | 0.0000    |
| 7838.9229              | 6055.4334   | 306.5412   | -1783.4895  | 6119.5911 |
| 305.2144               | 21.1548     | -123.2261  | 511540.4688 | -13.0647  |

Supplementary Text 6

-13.1135  
 [17465]ENERGY: 4730000      3274.8103      5274.1018      5487.4375  
 316.1339      -14415.7241      -1627.8894      0.0000      0.0000  
 7748.6580      6057.5279      303.0114      -1691.1301      6118.9374  
 305.1590      101.9294      92.6436      511540.4688      -19.6503  
 -19.6170  
 [17515]ENERGY: 4740000      3194.5617      5372.3616      5434.9187  
 324.4534      -14307.1232      -1788.4616      0.0000      0.0000  
 7825.1202      6055.8308      306.0014      -1769.2893      6119.6523  
 305.1909      -29.9342      -122.3200      511540.4688      -13.9169  
 -13.9453  
 [17551]ENERGY: 4750000      3265.1743      5351.3377      5423.5854  
 323.2555      -14505.0310      -1653.7545      0.0000      0.0000  
 7848.2291      6052.7964      306.9051      -1795.4327      6119.6106  
 305.1499      77.3879      103.8359      511540.4688      -14.6343  
 -14.6359  
 [17601]ENERGY: 4760000      3245.6432      5254.3062      5450.3734  
 319.1806      -14237.3076      -1747.1173      0.0000      0.0000  
 7773.9347      6059.0132      303.9998      -1714.9215      6120.3573  
 305.1677      27.6524      9.4995      511540.4688      -17.4068  
 -17.3837  
 [17637]ENERGY: 4770000      3215.3535      5311.6180      5460.2899  
 296.2393      -14387.5808      -1693.2389      0.0000      0.0000  
 7855.7988      6058.4797      307.2011      -1797.3191      6120.0962  
 305.3680      -75.0094      -121.7184      511540.4688      -11.6941  
 -11.7029  
 [17687]ENERGY: 4780000      3232.5837      5393.4536      5433.5326  
 317.5433      -14307.8415      -1742.5425      0.0000      0.0000  
 7730.5445      6057.2737      302.3031      -1673.2708      6119.6786  
 305.1111      -193.0061      -247.5128      511540.4688      -14.2679  
 -14.2566  
 [17723]ENERGY: 4790000      3197.8267      5302.1515      5425.3428  
 309.6973      -14376.1388      -1625.7428      0.0000      0.0000  
 7824.5293      6057.6659      305.9783      -1766.8635      6120.1097  
 305.0260      201.1109      197.8657      511540.4688      -17.6629  
 -17.6851  
 [17776]ENERGY: 4800000      3292.1448      5200.9071      5414.3944  
 329.0243      -14362.0218      -1665.1214      0.0000      0.0000  
 7847.6490      6056.9764      306.8824      -1790.6725      6119.5847  
 305.3636      -209.2071      -133.3673      511540.4688      -13.1746  
 -13.1430  
 [17812]ENERGY: 4810000      3186.1630      5319.6246      5466.3407  
 315.6234      -14310.5834      -1725.3264      0.0000      0.0000  
 7806.1155      6057.9573      305.2583      -1748.1582      6120.6624  
 305.1293      97.7736      25.8032      511540.4688      -11.2271  
 -11.2460  
 [17862]ENERGY: 4820000      3244.8934      5346.8769      5430.7645  
 317.8717      -14410.3813      -1682.0566      0.0000      0.0000  
 7803.9239      6051.8926      305.1726      -1752.0313      6120.0097  
 305.1889      -163.7078      -221.3222      511540.4688      -12.7266  
 -12.7365  
 [17898]ENERGY: 4830000      3158.6892      5358.7706      5421.6876  
 326.8140      -14427.8940      -1605.4506      0.0000      0.0000  
 7821.1731      6053.7899      305.8471      -1767.3832      6119.3470

## Supplementary Text 6

|                        |             |            |             |           |
|------------------------|-------------|------------|-------------|-----------|
| 305.0263               | 89.7077     | 77.3132    | 511540.4688 | -13.9304  |
| -13.9095               |             |            |             |           |
| [17948]ENERGY: 4840000 | 3242.0396   | 5330.5702  | 5424.2494   |           |
| 306.4317               | -14332.5656 | -1757.4030 | 0.0000      | 0.0000    |
| 7840.1526              | 6053.4749   | 306.5893   | -1786.6777  | 6120.4941 |
| 305.3268               | -82.0132    | -99.1638   | 511540.4688 | -14.4903  |
| -14.5007               |             |            |             |           |
| [17984]ENERGY: 4850000 | 3270.6392   | 5375.1878  | 5494.8551   |           |
| 334.7796               | -14398.8573 | -1764.3099 | 0.0000      | 0.0000    |
| 7748.1810              | 6060.4755   | 302.9927   | -1687.7055  | 6121.3355 |
| 305.2803               | -305.8113   | -255.6119  | 511540.4688 | -13.8439  |
| -13.8532               |             |            |             |           |
| [18034]ENERGY: 4860000 | 3140.0860   | 5290.4379  | 5455.0652   |           |
| 351.4921               | -14347.2737 | -1648.9058 | 0.0000      | 0.0000    |
| 7813.3609              | 6054.2626   | 305.5416   | -1759.0983  | 6118.8631 |
| 305.3487               | -55.1209    | 11.4331    | 511540.4688 | -19.3732  |
| -19.3480               |             |            |             |           |
| [18070]ENERGY: 4870000 | 3231.3220   | 5367.6409  | 5411.7222   |           |
| 329.4703               | -14385.2548 | -1652.7672 | 0.0000      | 0.0000    |
| 7758.2052              | 6060.3387   | 303.3847   | -1697.8665  | 6121.5090 |
| 305.1744               | 31.8841     | 11.6333    | 511540.4688 | -16.4150  |
| -16.4183               |             |            |             |           |
| [18120]ENERGY: 4880000 | 3211.8841   | 5265.1538  | 5500.3056   |           |
| 342.8139               | -14437.5832 | -1665.9615 | 0.0000      | 0.0000    |
| 7840.0074              | 6056.6201   | 306.5836   | -1783.3872  | 6121.3826 |
| 305.1037               | 32.6843     | 83.5598    | 511540.4688 | -15.9656  |
| -15.9696               |             |            |             |           |
| [18156]ENERGY: 4890000 | 3271.8221   | 5358.4218  | 5428.5960   |           |
| 327.0989               | -14427.8858 | -1655.4686 | 0.0000      | 0.0000    |
| 7754.1770              | 6056.7615   | 303.2272   | -1697.4156  | 6122.0068 |
| 305.3371               | -145.9581   | -224.6557  | 511540.4688 | -18.8528  |
| -18.8518               |             |            |             |           |
| [18209]ENERGY: 4900000 | 3312.9802   | 5361.6606  | 5439.1724   |           |
| 299.6200               | -14378.0349 | -1725.6915 | 0.0000      | 0.0000    |
| 7751.7135              | 6061.4203   | 303.1309   | -1690.2931  | 6122.5224 |
| 305.6073               | -76.9843    | -40.3172   | 511540.4688 | -14.7585  |
| -14.7536               |             |            |             |           |
| [18245]ENERGY: 4910000 | 3172.4320   | 5321.9920  | 5423.6385   |           |
| 328.4243               | -14316.8759 | -1722.5584 | 0.0000      | 0.0000    |
| 7848.6599              | 6055.7123   | 306.9220   | -1792.9476  | 6123.0938 |
| 305.4949               | -242.5023   | -109.6179  | 511540.4688 | -16.7533  |
| -16.7643               |             |            |             |           |
| [18295]ENERGY: 4920000 | 3157.6457   | 5310.1732  | 5485.1888   |           |
| 325.9998               | -14338.1670 | -1718.0401 | 0.0000      | 0.0000    |
| 7833.4813              | 6056.2816   | 306.3284   | -1777.1997  | 6122.0379 |
| 305.3412               | -14.5169    | 23.0037    | 511540.4688 | -20.5074  |
| -20.5015               |             |            |             |           |
| [18331]ENERGY: 4930000 | 3209.9605   | 5277.7553  | 5412.3968   |           |
| 332.4125               | -14365.4664 | -1639.8210 | 0.0000      | 0.0000    |
| 7832.6529              | 6059.8907   | 306.2960   | -1772.7622  | 6122.7190 |
| 305.1148               | -114.0048   | -1.7368    | 511540.4688 | -15.8756  |
| -15.8805               |             |            |             |           |
| [18381]ENERGY: 4940000 | 3325.6723   | 5355.7680  | 5473.2580   |           |
| 326.5339               | -14335.3201 | -1723.0003 | 0.0000      | 0.0000    |

## Supplementary Text 6

|                        |             |            |             |           |
|------------------------|-------------|------------|-------------|-----------|
| 7641.8063              | 6064.7181   | 298.8330   | -1577.0882  | 6123.1604 |
| 305.0459               | -126.9651   | -136.9235  | 511540.4688 | -14.7597  |
| -14.7779               |             |            |             |           |
| [18417]ENERGY: 4950000 | 3183.8445   | 5279.4271  | 5453.8137   |           |
| 328.0054               | -14342.0854 | -1713.6445 | 0.0000      | 0.0000    |
| 7869.5585              | 6058.9193   | 307.7392   | -1810.6393  | 6122.5599 |
| 305.2453               | 60.2641     | 18.4825    | 511540.4688 | -16.0604  |
| -16.0413               |             |            |             |           |
| [18467]ENERGY: 4960000 | 3206.9350   | 5303.9439  | 5482.9551   |           |
| 327.7859               | -14373.5645 | -1708.5528 | 0.0000      | 0.0000    |
| 7818.1612              | 6057.6638   | 305.7293   | -1760.4975  | 6123.2060 |
| 305.2681               | 1.4737      | -154.0735  | 511540.4688 | -16.4263  |
| -16.4116               |             |            |             |           |
| [18503]ENERGY: 4970000 | 3258.0308   | 5369.0681  | 5471.7609   |           |
| 321.4491               | -14316.4492 | -1804.3497 | 0.0000      | 0.0000    |
| 7756.7569              | 6056.2668   | 303.3281   | -1700.4901  | 6123.4624 |
| 305.3923               | -43.7887    | -41.4122   | 511540.4688 | -14.9019  |
| -14.9258               |             |            |             |           |
| [18553]ENERGY: 4980000 | 3298.9846   | 5312.5967  | 5428.4765   |           |
| 314.2697               | -14354.4718 | -1790.2220 | 0.0000      | 0.0000    |
| 7849.5966              | 6059.2303   | 306.9586   | -1790.3664  | 6125.3364 |
| 305.3589               | -25.2350    | -63.3564   | 511540.4688 | -15.3446  |
| -15.3176               |             |            |             |           |
| [18589]ENERGY: 4990000 | 3264.0781   | 5240.8666  | 5477.1805   |           |
| 322.6365               | -14316.1442 | -1764.1441 | 0.0000      | 0.0000    |
| 7837.6010              | 6062.0745   | 306.4895   | -1775.5265  | 6124.6074 |
| 305.4109               | 11.6820     | -65.1939   | 511540.4688 | -20.0246  |
| -20.0365               |             |            |             |           |
| [18642]ENERGY: 5000000 | 3258.3273   | 5316.0132  | 5419.2336   |           |
| 332.4553               | -14339.2402 | -1702.8894 | 0.0000      | 0.0000    |
| 7780.7089              | 6064.6086   | 304.2647   | -1716.1003  | 6124.8147 |
| 305.4859               | -253.4686   | -310.6234  | 511540.4688 | -13.5910  |
| -13.5768               |             |            |             |           |
| [18678]ENERGY: 5010000 | 3218.3423   | 5313.7143  | 5465.5936   |           |
| 340.0447               | -14387.1050 | -1703.4942 | 0.0000      | 0.0000    |
| 7817.3093              | 6064.4050   | 305.6960   | -1752.9042  | 6124.8281 |
| 305.5067               | 61.7549     | -82.6236   | 511540.4688 | -16.8989  |
| -16.9187               |             |            |             |           |
| [18728]ENERGY: 5020000 | 3212.6387   | 5267.0160  | 5462.8008   |           |
| 303.0286               | -14361.6821 | -1717.1984 | 0.0000      | 0.0000    |
| 7893.2220              | 6059.8256   | 308.6646   | -1833.3964  | 6124.0631 |
| 305.5809               | -35.9106    | 72.8698    | 511540.4688 | -17.4680  |
| -17.4558               |             |            |             |           |
| [18764]ENERGY: 5030000 | 3213.0174   | 5304.7074  | 5433.3831   |           |
| 298.5506               | -14368.4315 | -1672.2331 | 0.0000      | 0.0000    |
| 7849.8548              | 6058.8487   | 306.9687   | -1791.0061  | 6125.5774 |
| 305.5513               | 203.7562    | 109.7288   | 511540.4688 | -14.0462  |
| -14.0700               |             |            |             |           |
| [18814]ENERGY: 5040000 | 3235.8604   | 5308.1024  | 5443.8824   |           |
| 322.4471               | -14320.2315 | -1668.2428 | 0.0000      | 0.0000    |
| 7742.8587              | 6064.6767   | 302.7846   | -1678.1820  | 6124.4578 |
| 305.4307               | 88.2817     | 105.7722   | 511540.4688 | -14.2935  |
| -14.2872               |             |            |             |           |
| [18850]ENERGY: 5050000 | 3244.4750   | 5298.9968  | 5461.0320   |           |

## Supplementary Text 6

|                        |             |            |             |           |
|------------------------|-------------|------------|-------------|-----------|
| 318.2751               | -14421.9916 | -1704.0519 | 0.0000      | 0.0000    |
| 7865.3486              | 6062.0840   | 307.5746   | -1803.2646  | 6125.0833 |
| 305.3617               | 32.4088     | -37.2307   | 511540.4688 | -13.7041  |
| -13.6872               |             |            |             |           |
| [18900]ENERGY: 5060000 | 3284.0767   | 5250.1425  | 5447.9101   |           |
| 328.8781               | -14348.0332 | -1746.8575 | 0.0000      | 0.0000    |
| 7842.3552              | 6058.4720   | 306.6754   | -1783.8832  | 6125.3178 |
| 305.3343               | -69.8242    | -126.2697  | 511540.4688 | -8.4282   |
| -8.4353                |             |            |             |           |
| [18936]ENERGY: 5070000 | 3174.6149   | 5247.4821  | 5486.9983   |           |
| 336.8113               | -14286.8210 | -1677.1737 | 0.0000      | 0.0000    |
| 7781.8746              | 6063.7865   | 304.3103   | -1718.0881  | 6125.8872 |
| 305.2140               | 7.0278      | -69.7083   | 511540.4688 | -12.9430  |
| -12.9477               |             |            |             |           |
| [18986]ENERGY: 5080000 | 3212.2938   | 5332.7162  | 5470.9675   |           |
| 328.4341               | -14380.4916 | -1670.8906 | 0.0000      | 0.0000    |
| 7768.9632              | 6061.9926   | 303.8054   | -1706.9706  | 6125.1763 |
| 305.2623               | 30.3569     | 35.9473    | 511540.4688 | -5.6048   |
| -5.6084                |             |            |             |           |
| [19022]ENERGY: 5090000 | 3340.4261   | 5276.7052  | 5470.5382   |           |
| 311.9986               | -14347.7066 | -1705.6660 | 0.0000      | 0.0000    |
| 7719.7040              | 6065.9995   | 301.8791   | -1653.7045  | 6125.7313 |
| 305.4528               | -269.1892   | -160.3176  | 511540.4688 | -11.4899  |
| -11.4815               |             |            |             |           |
| [19075]ENERGY: 5100000 | 3268.8094   | 5291.6216  | 5461.5641   |           |
| 338.9646               | -14317.9240 | -1786.2415 | 0.0000      | 0.0000    |
| 7806.6058              | 6063.4000   | 305.2774   | -1743.2058  | 6125.7274 |
| 305.5384               | -219.6605   | -260.0782  | 511540.4688 | -11.5704  |
| -11.5674               |             |            |             |           |
| [19111]ENERGY: 5110000 | 3226.4546   | 5427.1182  | 5475.4184   |           |
| 320.3266               | -14473.0833 | -1721.8560 | 0.0000      | 0.0000    |
| 7805.2582              | 6059.6367   | 305.2247   | -1745.6215  | 6124.9387 |
| 305.6882               | 304.1299    | 181.8593   | 511540.4688 | -10.0450  |
| -10.0597               |             |            |             |           |
| [19161]ENERGY: 5120000 | 3168.8916   | 5261.5313  | 5500.8140   |           |
| 320.4526               | -14201.1375 | -1718.1910 | 0.0000      | 0.0000    |
| 7733.6098              | 6065.9707   | 302.4229   | -1667.6391  | 6125.7083 |
| 305.6659               | 117.2595    | 36.6995    | 511540.4688 | -10.0474  |
| -10.0403               |             |            |             |           |
| [19197]ENERGY: 5130000 | 3207.6140   | 5285.7918  | 5405.9276   |           |
| 329.6917               | -14292.9608 | -1693.5154 | 0.0000      | 0.0000    |
| 7816.4549              | 6059.0039   | 305.6626   | -1757.4510  | 6125.1556 |
| 305.6828               | -16.4183    | -74.7028   | 511540.4688 | -11.4992  |
| -11.5069               |             |            |             |           |
| [19247]ENERGY: 5140000 | 3208.0370   | 5327.3220  | 5441.9048   |           |
| 309.1443               | -14388.9519 | -1661.4008 | 0.0000      | 0.0000    |
| 7825.2300              | 6061.2854   | 306.0057   | -1763.9447  | 6125.9832 |
| 305.7778               | 82.0589     | -14.1630   | 511540.4688 | -12.6222  |
| -12.6099               |             |            |             |           |
| [19283]ENERGY: 5150000 | 3302.8545   | 5244.1555  | 5479.1644   |           |
| 312.9031               | -14400.5537 | -1661.4196 | 0.0000      | 0.0000    |
| 7787.3871              | 6064.4913   | 304.5259   | -1722.8958  | 6125.1602 |
| 305.4931               | -112.7276   | -170.1470  | 511540.4688 | -13.0079  |
| -13.0247               |             |            |             |           |



## Supplementary Text 6

|                        |             |            |             |           |
|------------------------|-------------|------------|-------------|-----------|
| [19333]ENERGY: 5160000 | 3194.6894   | 5253.9272  | 5455.5326   |           |
| 311.3414               | -14319.9280 | -1704.8305 | 0.0000      | 0.0000    |
| 7872.1703              | 6062.9024   | 307.8413   | -1809.2679  | 6127.0852 |
| 305.6922               | 281.2005    | 196.9872   | 511540.4688 | -11.6651  |
| -11.6644               |             |            |             |           |
| [19369]ENERGY: 5170000 | 3232.4337   | 5337.7193  | 5452.1423   |           |
| 322.6244               | -14303.9715 | -1740.9424 | 0.0000      | 0.0000    |
| 7760.5451              | 6060.5509   | 303.4762   | -1699.9942  | 6126.5579 |
| 305.5693               | -153.6694   | 1.6175     | 511540.4688 | -10.4642  |
| -10.4553               |             |            |             |           |
| [19419]ENERGY: 5180000 | 3261.0518   | 5294.2179  | 5446.5449   |           |
| 336.8131               | -14403.1661 | -1675.9482 | 0.0000      | 0.0000    |
| 7803.2483              | 6062.7617   | 305.1461   | -1740.4866  | 6127.7428 |
| 305.4207               | 140.7455    | 86.8765    | 511540.4688 | -12.1675  |
| -12.1682               |             |            |             |           |
| [19455]ENERGY: 5190000 | 3271.0354   | 5205.5580  | 5492.2681   |           |
| 349.5435               | -14355.6802 | -1734.2982 | 0.0000      | 0.0000    |
| 7833.8733              | 6062.2999   | 306.3437   | -1771.5735  | 6128.0356 |
| 305.5496               | 129.0366    | 87.4642    | 511540.4688 | -6.8390   |
| -6.8344                |             |            |             |           |
| [19508]ENERGY: 5200000 | 3244.2009   | 5288.7880  | 5494.9673   |           |
| 314.6558               | -14431.7624 | -1683.6155 | 0.0000      | 0.0000    |
| 7835.1302              | 6062.3642   | 306.3929   | -1772.7660  | 6127.6323 |
| 305.5626               | 109.8966    | 40.9076    | 511540.4688 | -13.4242  |
| -13.4339               |             |            |             |           |
| [19544]ENERGY: 5210000 | 3149.2739   | 5342.2788  | 5473.7165   |           |
| 311.0853               | -14344.2701 | -1699.2007 | 0.0000      | 0.0000    |
| 7829.7296              | 6062.6133   | 306.1817   | -1767.1163  | 6128.9824 |
| 305.5411               | 203.0288    | 132.5681   | 511540.4688 | -9.3336   |
| -9.3184                |             |            |             |           |
| [19594]ENERGY: 5220000 | 3228.0068   | 5301.5165  | 5468.9584   |           |
| 308.1674               | -14376.3629 | -1675.1505 | 0.0000      | 0.0000    |
| 7809.2585              | 6064.3941   | 305.3812   | -1744.8643  | 6127.3861 |
| 305.3131               | 138.6008    | 98.0094    | 511540.4688 | -10.9970  |
| -11.0073               |             |            |             |           |
| [19630]ENERGY: 5230000 | 3265.7744   | 5388.7310  | 5490.9367   |           |
| 323.6558               | -14426.2506 | -1779.6436 | 0.0000      | 0.0000    |
| 7802.4664              | 6065.6701   | 305.1156   | -1736.7963  | 6127.8199 |
| 305.1926               | -28.8585    | 22.2093    | 511540.4688 | -9.3695   |
| -9.3700                |             |            |             |           |
| [19680]ENERGY: 5240000 | 3201.9646   | 5313.2022  | 5513.2558   |           |
| 324.2632               | -14336.4606 | -1766.0372 | 0.0000      | 0.0000    |
| 7817.9067              | 6068.0947   | 305.7194   | -1749.8120  | 6129.5305 |
| 305.5812               | -5.6355     | -16.1373   | 511540.4688 | -13.7540  |
| -13.7628               |             |            |             |           |
| [19716]ENERGY: 5250000 | 3238.9742   | 5315.1950  | 5443.5000   |           |
| 335.1148               | -14263.2207 | -1788.2565 | 0.0000      | 0.0000    |
| 7783.4063              | 6064.7131   | 304.3702   | -1718.6932  | 6129.5626 |
| 305.4669               | 50.7136     | -35.1851   | 511540.4688 | -10.7862  |
| -10.7770               |             |            |             |           |
| [19766]ENERGY: 5260000 | 3231.7240   | 5319.4321  | 5500.2459   |           |
| 313.0842               | -14339.3785 | -1761.3815 | 0.0000      | 0.0000    |
| 7805.2295              | 6068.9556   | 305.2236   | -1736.2739  | 6129.9708 |
| 305.5861               | 180.5899    | 48.6724    | 511540.4688 | -13.7102  |

Supplementary Text 6

-13.7174  
 [19802]ENERGY: 5270000      3275.7962      5309.8921      5437.7028  
 313.3998      -14456.1687      -1603.8917      0.0000      0.0000  
 7792.2810      6069.0116      304.7173      -1723.2694      6128.2041  
 305.4710      48.6791      87.1075      511540.4688      -10.2766  
 -10.2587  
 [19852]ENERGY: 5280000      3211.6494      5387.6577      5458.8068  
 322.6747      -14358.5434      -1724.3224      0.0000      0.0000  
 7769.1136      6067.0364      303.8113      -1702.0772      6130.5251  
 305.6420      3.4088      62.6216      511540.4688      -10.7958  
 -10.7906  
 [19888]ENERGY: 5290000      3185.4734      5283.5518      5473.1274  
 326.2680      -14250.5382      -1768.0840      0.0000      0.0000  
 7817.0988      6066.8972      305.6878      -1750.2016      6129.6568  
 305.6359      11.9190      34.7758      511540.4688      -16.7922  
 -16.8087  
 [19941]ENERGY: 5300000      3285.9576      5276.0824      5456.2157  
 312.4493      -14336.1676      -1715.3930      0.0000      0.0000  
 7791.7439      6070.8882      304.6963      -1720.8556      6131.3945  
 305.4786      3.3478      -118.9806      511540.4688      -6.9022  
 -6.9036  
 [19977]ENERGY: 5310000      3216.2921      5312.2191      5437.2274  
 335.1663      -14398.1809      -1643.3663      0.0000      0.0000  
 7805.8985      6065.2564      305.2498      -1740.6421      6130.1504  
 305.3877      35.1192      22.0049      511540.4688      -11.0176  
 -11.0106  
 [20027]ENERGY: 5320000      3280.4868      5262.9857      5475.9046  
 331.1579      -14387.1402      -1628.2843      0.0000      0.0000  
 7731.7903      6066.9007      302.3518      -1664.8896      6128.9182  
 305.3104      50.6076      85.0593      511540.4688      -9.9394  
 -9.9313  
 [20063]ENERGY: 5330000      3186.6294      5402.4208      5420.6089  
 316.7358      -14384.0245      -1681.2975      0.0000      0.0000  
 7804.8397      6065.9126      305.2084      -1738.9271      6130.1507  
 305.1433      152.4599      50.6784      511540.4688      -14.2485  
 -14.2481  
 [20113]ENERGY: 5340000      3246.8739      5311.9496      5459.6516  
 313.6604      -14317.0755      -1767.1491      0.0000      0.0000  
 7819.8624      6067.7732      305.7958      -1752.0891      6130.1444  
 305.4029      -56.6069      -18.9118      511540.4688      -10.8844  
 -10.8926  
 [20149]ENERGY: 5350000      3235.1602      5332.9206      5452.7204  
 312.0022      -14251.6091      -1769.4110      0.0000      0.0000  
 7757.3436      6069.1269      303.3510      -1688.2167      6129.5801  
 305.4546      29.2269      59.5448      511540.4688      -13.0139  
 -13.0126  
 [20199]ENERGY: 5360000      3222.8249      5244.2161      5436.6928  
 307.2597      -14277.0435      -1753.3758      0.0000      0.0000  
 7885.7238      6066.2980      308.3714      -1819.4258      6131.3715  
 305.4980      47.1685      74.4116      511540.4688      -14.8428  
 -14.8281  
 [20235]ENERGY: 5370000      3163.3840      5307.7840      5500.9384  
 315.4780      -14301.9418      -1761.9869      0.0000      0.0000  
 7841.7181      6065.3737      306.6505      -1776.3443      6131.5921

## Supplementary Text 6

|                        |             |            |             |           |
|------------------------|-------------|------------|-------------|-----------|
| 305.4632               | 183.2084    | 129.9032   | 511540.4688 | -10.7714  |
| -10.8154               |             |            |             |           |
| [20285]ENERGY: 5380000 | 3305.4610   | 5286.4545  | 5529.3998   |           |
| 316.6651               | -14298.1912 | -1839.2396 | 0.0000      | 0.0000    |
| 7771.5626              | 6072.1123   | 303.9071   | -1699.4504  | 6130.6999 |
| 305.4510               | 22.5344     | -67.5217   | 511540.4688 | -15.3129  |
| -15.2719               |             |            |             |           |
| [20321]ENERGY: 5390000 | 3262.6177   | 5481.4868  | 5430.8307   |           |
| 323.2904               | -14451.0775 | -1707.2802 | 0.0000      | 0.0000    |
| 7729.1856              | 6069.0535   | 302.2499   | -1660.1321  | 6130.8838 |
| 305.4325               | 45.8044     | 9.3724     | 511540.4688 | -16.1582  |
| -16.1794               |             |            |             |           |
| [20374]ENERGY: 5400000 | 3290.5259   | 5292.1397  | 5414.1909   |           |
| 327.2415               | -14363.1317 | -1771.9760 | 0.0000      | 0.0000    |
| 7878.2540              | 6067.2444   | 308.0792   | -1811.0097  | 6132.8537 |
| 305.6155               | -192.5861   | -172.6668  | 511540.4688 | -10.5230  |
| -10.5160               |             |            |             |           |
| [20410]ENERGY: 5410000 | 3229.2591   | 5242.6065  | 5398.3187   |           |
| 304.0927               | -14314.1201 | -1651.8259 | 0.0000      | 0.0000    |
| 7859.8113              | 6068.1423   | 307.3580   | -1791.6690  | 6132.2975 |
| 305.5013               | -169.3908   | 2.9017     | 511540.4688 | -14.5842  |
| -14.5724               |             |            |             |           |
| [20460]ENERGY: 5420000 | 3161.3378   | 5261.6653  | 5472.7669   |           |
| 330.0865               | -14282.3289 | -1703.8048 | 0.0000      | 0.0000    |
| 7827.9991              | 6067.7219   | 306.1140   | -1760.2772  | 6132.7842 |
| 305.3134               | 32.1383     | 23.6043    | 511540.4688 | -8.9240   |
| -8.9354                |             |            |             |           |
| [20496]ENERGY: 5430000 | 3168.2940   | 5385.3634  | 5416.2834   |           |
| 313.1619               | -14308.8578 | -1678.0312 | 0.0000      | 0.0000    |
| 7776.1786              | 6072.3922   | 304.0876   | -1703.7864  | 6133.6325 |
| 305.5494               | 173.5936    | 145.4711   | 511540.4688 | -10.7696  |
| -10.7680               |             |            |             |           |
| [20546]ENERGY: 5440000 | 3253.7349   | 5246.3136  | 5459.8332   |           |
| 346.0803               | -14313.2581 | -1709.5319 | 0.0000      | 0.0000    |
| 7784.5247              | 6067.6966   | 304.4140   | -1716.8281  | 6133.4268 |
| 305.6046               | -23.8532    | -80.2318   | 511540.4688 | -13.5468  |
| -13.5338               |             |            |             |           |
| [20582]ENERGY: 5450000 | 3172.9307   | 5423.8139  | 5430.1796   |           |
| 314.7710               | -14353.0253 | -1688.5656 | 0.0000      | 0.0000    |
| 7771.9954              | 6072.0999   | 303.9240   | -1699.8955  | 6134.6286 |
| 305.4665               | -9.3619     | -83.0459   | 511540.4688 | -14.0327  |
| -14.0329               |             |            |             |           |
| [20632]ENERGY: 5460000 | 3236.0168   | 5362.2162  | 5451.1853   |           |
| 322.8263               | -14444.9065 | -1619.8850 | 0.0000      | 0.0000    |
| 7766.3718              | 6073.8248   | 303.7041   | -1692.5470  | 6135.1846 |
| 305.5307               | 66.4704     | 139.7900   | 511540.4688 | -12.0957  |
| -12.1111               |             |            |             |           |
| [20668]ENERGY: 5470000 | 3192.5149   | 5266.7895  | 5499.8637   |           |
| 323.3185               | -14305.8211 | -1738.8237 | 0.0000      | 0.0000    |
| 7836.0294              | 6073.8712   | 306.4281   | -1762.1582  | 6136.0441 |
| 305.4396               | 106.1637    | 22.3836    | 511540.4688 | -10.5251  |
| -10.5355               |             |            |             |           |
| [20718]ENERGY: 5480000 | 3279.0525   | 5320.6884  | 5542.3276   |           |
| 339.7029               | -14348.4181 | -1754.4383 | 0.0000      | 0.0000    |

## Supplementary Text 6

|                        |             |            |             |           |
|------------------------|-------------|------------|-------------|-----------|
| 7698.8065              | 6077.7216   | 301.0619   | -1621.0849  | 6136.9415 |
| 305.5704               | -49.9462    | 47.4135    | 511540.4688 | -13.4954  |
| -13.4942               |             |            |             |           |
| [20754]ENERGY: 5490000 | 3267.0571   | 5228.7799  | 5474.4111   |           |
| 330.5581               | -14339.8403 | -1635.4693 | 0.0000      | 0.0000    |
| 7750.3721              | 6075.8688   | 303.0784   | -1674.5034  | 6136.9522 |
| 305.5111               | -166.0070   | -55.2117   | 511540.4688 | -11.8690  |
| -11.8609               |             |            |             |           |
| [20807]ENERGY: 5500000 | 3250.1757   | 5352.7444  | 5459.6240   |           |
| 332.9130               | -14333.4971 | -1759.9750 | 0.0000      | 0.0000    |
| 7773.0726              | 6075.0576   | 303.9661   | -1698.0150  | 6137.4240 |
| 305.4505               | 115.7214    | 60.1418    | 511540.4688 | -15.7424  |
| -15.7289               |             |            |             |           |
| [20843]ENERGY: 5510000 | 3251.6729   | 5295.3655  | 5457.1236   |           |
| 308.3905               | -14245.5185 | -1722.8327 | 0.0000      | 0.0000    |
| 7736.6757              | 6080.8771   | 302.5428   | -1655.7987  | 6138.5892 |
| 305.5913               | 63.3769     | 23.8876    | 511540.4688 | -11.1644  |
| -11.1687               |             |            |             |           |
| [20893]ENERGY: 5520000 | 3196.7865   | 5304.2461  | 5479.8585   |           |
| 323.0525               | -14367.1146 | -1757.3146 | 0.0000      | 0.0000    |
| 7896.1628              | 6075.6772   | 308.7796   | -1820.4856  | 6139.1163 |
| 305.5853               | -107.5310   | -35.9144   | 511540.4688 | -16.2295  |
| -16.2294               |             |            |             |           |
| [20929]ENERGY: 5530000 | 3242.6640   | 5325.8551  | 5456.3002   |           |
| 307.1654               | -14246.8888 | -1774.0787 | 0.0000      | 0.0000    |
| 7767.8087              | 6078.8259   | 303.7603   | -1688.9828  | 6138.8580 |
| 305.7861               | -207.6447   | -202.1277  | 511540.4688 | -13.8377  |
| -13.8391               |             |            |             |           |
| [20979]ENERGY: 5540000 | 3215.1096   | 5268.4505  | 5450.7778   |           |
| 330.8219               | -14266.0458 | -1730.6126 | 0.0000      | 0.0000    |
| 7805.8607              | 6074.3622   | 305.2483   | -1731.4985  | 6138.6756 |
| 305.5708               | 20.4595     | 33.6822    | 511540.4688 | -15.3670  |
| -15.3778               |             |            |             |           |
| [21015]ENERGY: 5550000 | 3306.9232   | 5285.8700  | 5445.2514   |           |
| 327.1373               | -14382.4268 | -1737.2324 | 0.0000      | 0.0000    |
| 7830.8966              | 6076.4192   | 306.2273   | -1754.4773  | 6137.3529 |
| 305.7937               | -92.4692    | -60.6097   | 511540.4688 | -18.4764  |
| -18.4584               |             |            |             |           |
| [21065]ENERGY: 5560000 | 3233.9607   | 5323.9445  | 5481.3931   |           |
| 333.4352               | -14397.8985 | -1713.9798 | 0.0000      | 0.0000    |
| 7814.1827              | 6075.0378   | 305.5737   | -1739.1449  | 6138.7671 |
| 305.5645               | -100.8624   | -132.5725  | 511540.4688 | -17.6733  |
| -17.6920               |             |            |             |           |
| [21101]ENERGY: 5570000 | 3254.1787   | 5307.8881  | 5441.7976   |           |
| 323.2190               | -14234.1623 | -1808.4563 | 0.0000      | 0.0000    |
| 7789.5665              | 6074.0312   | 304.6111   | -1715.5352  | 6137.8575 |
| 305.7003               | -350.6904   | -263.9094  | 511540.4688 | -11.8607  |
| -11.8625               |             |            |             |           |
| [21151]ENERGY: 5580000 | 3276.4865   | 5332.8977  | 5450.4691   |           |
| 328.3772               | -14314.3536 | -1735.3812 | 0.0000      | 0.0000    |
| 7739.8662              | 6078.3620   | 302.6676   | -1661.5042  | 6137.8390 |
| 305.8220               | -56.9912    | 70.6801    | 511540.4688 | -15.5328  |
| -15.5000               |             |            |             |           |
| [21187]ENERGY: 5590000 | 3263.7755   | 5289.8214  | 5418.3435   |           |

## Supplementary Text 6

|                        |             |            |             |           |
|------------------------|-------------|------------|-------------|-----------|
| 317.7703               | -14330.3883 | -1659.5299 | 0.0000      | 0.0000    |
| 7776.1841              | 6075.9767   | 304.0878   | -1700.2074  | 6136.7033 |
| 305.7183               | 72.5889     | -58.3400   | 511540.4688 | -18.3880  |
| -18.4157               |             |            |             |           |
| [21240]ENERGY: 5600000 | 3212.4685   | 5271.1762  | 5473.4019   |           |
| 324.6429               | -14312.4408 | -1706.1873 | 0.0000      | 0.0000    |
| 7811.5028              | 6074.5640   | 305.4689   | -1736.9387  | 6137.3178 |
| 305.8395               | 3.2711      | 45.3950    | 511540.4688 | -12.4027  |
| -12.4054               |             |            |             |           |
| [21276]ENERGY: 5610000 | 3145.6704   | 5273.0023  | 5417.3523   |           |
| 321.9601               | -14341.9657 | -1662.9864 | 0.0000      | 0.0000    |
| 7920.0497              | 6073.0826   | 309.7137   | -1846.9670  | 6137.5414 |
| 305.8648               | 247.9873    | 142.2431   | 511540.4688 | -20.1871  |
| -20.2023               |             |            |             |           |
| [21326]ENERGY: 5620000 | 3175.6365   | 5392.6993  | 5418.9267   |           |
| 323.9232               | -14345.1918 | -1732.9226 | 0.0000      | 0.0000    |
| 7843.4978              | 6076.5691   | 306.7201   | -1766.9288  | 6137.6930 |
| 306.0079               | -20.6740    | -6.0454    | 511540.4688 | -21.8980  |
| -21.8813               |             |            |             |           |
| [21362]ENERGY: 5630000 | 3334.9276   | 5371.1461  | 5387.1415   |           |
| 309.4439               | -14337.1584 | -1757.2718 | 0.0000      | 0.0000    |
| 7766.4972              | 6074.7261   | 303.7090   | -1691.7711  | 6138.2284 |
| 305.9234               | -18.4753    | 17.7167    | 511540.4688 | -16.2349  |
| -16.2245               |             |            |             |           |
| [21412]ENERGY: 5640000 | 3196.9199   | 5350.3162  | 5472.3158   |           |
| 331.3809               | -14297.0044 | -1704.4980 | 0.0000      | 0.0000    |
| 7729.5181              | 6078.9484   | 302.2629   | -1650.5696  | 6138.0865 |
| 305.8410               | -62.8038    | -115.3282  | 511540.4688 | -19.7191  |
| -19.7352               |             |            |             |           |
| [21448]ENERGY: 5650000 | 3291.9711   | 5276.5781  | 5454.6483   |           |
| 340.8497               | -14387.3817 | -1710.1980 | 0.0000      | 0.0000    |
| 7808.8708              | 6075.3384   | 305.3660   | -1733.5324  | 6137.5791 |
| 305.9467               | 39.2573     | 49.4714    | 511540.4688 | -17.1953  |
| -17.1847               |             |            |             |           |
| [21498]ENERGY: 5660000 | 3193.3887   | 5288.8795  | 5458.1015   |           |
| 314.6177               | -14299.7881 | -1706.5657 | 0.0000      | 0.0000    |
| 7825.4153              | 6074.0488   | 306.0130   | -1751.3665  | 6138.4024 |
| 305.9214               | 58.8726     | -63.1076   | 511540.4688 | -19.1344  |
| -19.1374               |             |            |             |           |
| [21534]ENERGY: 5670000 | 3189.4420   | 5357.6649  | 5443.1465   |           |
| 305.3575               | -14371.1218 | -1672.9811 | 0.0000      | 0.0000    |
| 7824.5062              | 6076.0142   | 305.9774   | -1748.4919  | 6138.3452 |
| 305.9506               | 12.5862     | 24.5755    | 511540.4688 | -21.9142  |
| -21.9051               |             |            |             |           |
| [21584]ENERGY: 5680000 | 3228.6047   | 5317.1613  | 5398.9084   |           |
| 304.8397               | -14346.7157 | -1699.0051 | 0.0000      | 0.0000    |
| 7870.3721              | 6074.1655   | 307.7710   | -1796.2066  | 6137.4650 |
| 305.8051               | -3.3329     | -43.8875   | 511540.4688 | -18.3247  |
| -18.3360               |             |            |             |           |
| [21620]ENERGY: 5690000 | 3261.6132   | 5348.4770  | 5443.8442   |           |
| 318.6105               | -14399.3099 | -1667.3694 | 0.0000      | 0.0000    |
| 7769.4844              | 6075.3500   | 303.8258   | -1694.1344  | 6137.6214 |
| 305.7855               | 75.4757     | 86.9759    | 511540.4688 | -16.1433  |
| -16.1544               |             |            |             |           |

## Supplementary Text 6

|                        |             |            |             |           |
|------------------------|-------------|------------|-------------|-----------|
| [21673]ENERGY: 5700000 | 3209.0705   | 5368.0474  | 5500.6827   |           |
| 340.6747               | -14361.5648 | -1707.2350 | 0.0000      | 0.0000    |
| 7729.0053              | 6078.6808   | 302.2429   | -1650.3245  | 6138.3003 |
| 305.9151               | -223.2544   | -196.1957  | 511540.4688 | -20.5380  |
| -20.5447               |             |            |             |           |
| [21709]ENERGY: 5710000 | 3224.8248   | 5390.9038  | 5418.2583   |           |
| 325.8495               | -14393.2707 | -1682.0978 | 0.0000      | 0.0000    |
| 7791.3486              | 6075.8164   | 304.6808   | -1715.5322  | 6137.8710 |
| 306.0657               | 102.0123    | 189.3761   | 511540.4688 | -20.1179  |
| -20.0977               |             |            |             |           |
| [21759]ENERGY: 5720000 | 3314.7229   | 5322.2621  | 5427.8610   |           |
| 338.1449               | -14408.9574 | -1706.9718 | 0.0000      | 0.0000    |
| 7789.6584              | 6076.7202   | 304.6147   | -1712.9382  | 6138.4351 |
| 306.0146               | -124.9006   | -201.0617  | 511540.4688 | -19.0262  |
| -19.0481               |             |            |             |           |
| [21795]ENERGY: 5730000 | 3178.9767   | 5412.2648  | 5432.0326   |           |
| 333.5366               | -14383.6705 | -1739.6629 | 0.0000      | 0.0000    |
| 7839.2556              | 6072.7329   | 306.5542   | -1766.5227  | 6138.9628 |
| 305.9486               | 69.0276     | -23.3315   | 511540.4688 | -19.8185  |
| -19.7876               |             |            |             |           |
| [21845]ENERGY: 5740000 | 3236.0902   | 5393.7451  | 5436.9976   |           |
| 323.1388               | -14340.3520 | -1746.4536 | 0.0000      | 0.0000    |
| 7769.1635              | 6072.3295   | 303.8133   | -1696.8339  | 6139.0352 |
| 305.9171               | -63.2335    | -52.7116   | 511540.4688 | -21.2086  |
| -21.2144               |             |            |             |           |
| [21881]ENERGY: 5750000 | 3260.3788   | 5239.2579  | 5471.4670   |           |
| 322.0083               | -14332.4180 | -1757.2650 | 0.0000      | 0.0000    |
| 7869.5582              | 6072.9873   | 307.7392   | -1796.5710  | 6139.3296 |
| 306.0477               | -2.7287     | -71.2966   | 511540.4688 | -17.4235  |
| -17.4140               |             |            |             |           |
| [21931]ENERGY: 5760000 | 3310.0212   | 5212.1397  | 5427.0587   |           |
| 338.2617               | -14356.8226 | -1763.8228 | 0.0000      | 0.0000    |
| 7908.2454              | 6075.0811   | 309.2521   | -1833.1642  | 6139.4818 |
| 306.0118               | -113.7108   | -154.9840  | 511540.4688 | -20.1946  |
| -20.1928               |             |            |             |           |
| [21967]ENERGY: 5770000 | 3273.0162   | 5282.6316  | 5482.4783   |           |
| 315.6057               | -14321.9699 | -1747.5947 | 0.0000      | 0.0000    |
| 7792.8365              | 6077.0037   | 304.7390   | -1715.8328  | 6139.5570 |
| 305.8530               | -152.3458   | -203.9113  | 511540.4688 | -17.7895  |
| -17.8187               |             |            |             |           |
| [22017]ENERGY: 5780000 | 3268.0019   | 5283.9677  | 5433.3536   |           |
| 310.9953               | -14386.7279 | -1681.8068 | 0.0000      | 0.0000    |
| 7848.9618              | 6076.7456   | 306.9338   | -1772.2162  | 6139.9500 |
| 305.8230               | 141.5892    | 98.1929    | 511540.4688 | -18.4279  |
| -18.4256               |             |            |             |           |
| [22053]ENERGY: 5790000 | 3221.4976   | 5364.5840  | 5460.2386   |           |
| 345.2952               | -14339.6395 | -1736.2601 | 0.0000      | 0.0000    |
| 7763.9310              | 6079.6467   | 303.6086   | -1684.2843  | 6140.5777 |
| 305.8988               | 144.1647    | 44.8379    | 511540.4688 | -24.2157  |
| -24.2073               |             |            |             |           |
| [22106]ENERGY: 5800000 | 3221.9814   | 5304.3154  | 5460.6553   |           |
| 313.6470               | -14356.2136 | -1719.0254 | 0.0000      | 0.0000    |
| 7846.2513              | 6071.6113   | 306.8278   | -1774.6400  | 6139.8918 |
| 305.9916               | -96.3778    | -110.1803  | 511540.4688 | -15.4694  |

## Supplementary Text 6

-15.4700

|                        |             |            |             |           |
|------------------------|-------------|------------|-------------|-----------|
| [22142]ENERGY: 5810000 | 3094.7839   | 5313.4473  | 5402.8883   |           |
| 316.6431               | -14291.5864 | -1690.8011 | 0.0000      | 0.0000    |
| 7930.3981              | 6075.7733   | 310.1183   | -1854.6249  | 6139.3563 |
| 306.1722               | 197.7352    | 93.4484    | 511540.4688 | -22.4130  |

-22.4116

|                        |             |            |             |           |
|------------------------|-------------|------------|-------------|-----------|
| [22192]ENERGY: 5820000 | 3242.6374   | 5321.8297  | 5402.7920   |           |
| 312.0373               | -14358.7790 | -1712.6820 | 0.0000      | 0.0000    |
| 7867.1062              | 6074.9416   | 307.6433   | -1792.1646  | 6139.7473 |
| 306.0043               | -118.6134   | -200.1717  | 511540.4688 | -16.6136  |

-16.6180

|                        |             |            |             |           |
|------------------------|-------------|------------|-------------|-----------|
| [22228]ENERGY: 5830000 | 3267.4399   | 5244.7813  | 5450.5277   |           |
| 328.5304               | -14447.6697 | -1591.2204 | 0.0000      | 0.0000    |
| 7823.1539              | 6075.5433   | 305.9246   | -1747.6107  | 6139.4754 |
| 305.8029               | 71.3667     | 91.7056    | 511540.4688 | -18.1062  |

-18.0930

|                        |             |            |             |           |
|------------------------|-------------|------------|-------------|-----------|
| [22278]ENERGY: 5840000 | 3242.5001   | 5262.4542  | 5428.8378   |           |
| 325.1658               | -14288.6785 | -1749.0055 | 0.0000      | 0.0000    |
| 7852.9872              | 6074.2610   | 307.0912   | -1778.7261  | 6139.6317 |
| 306.0405               | -76.9841    | -121.1426  | 511540.4688 | -15.9701  |

-15.9865

|                        |             |            |             |           |
|------------------------|-------------|------------|-------------|-----------|
| [22314]ENERGY: 5850000 | 3318.1838   | 5295.5151  | 5458.4772   |           |
| 312.5885               | -14348.4418 | -1713.7723 | 0.0000      | 0.0000    |
| 7753.2675              | 6075.8179   | 303.1916   | -1677.4496  | 6140.5177 |
| 306.0967               | -11.7218    | 46.1064    | 511540.4688 | -20.5492  |

-20.5383

|                        |             |            |             |           |
|------------------------|-------------|------------|-------------|-----------|
| [22364]ENERGY: 5860000 | 3264.1636   | 5380.7605  | 5432.1479   |           |
| 326.6687               | -14416.8284 | -1728.1453 | 0.0000      | 0.0000    |
| 7814.6994              | 6073.4665   | 305.5939   | -1741.2330  | 6140.2651 |
| 305.8716               | -37.2646    | -63.2184   | 511540.4688 | -18.1627  |

-18.1697

|                        |             |            |             |           |
|------------------------|-------------|------------|-------------|-----------|
| [22400]ENERGY: 5870000 | 3219.1092   | 5292.2235  | 5431.5647   |           |
| 328.0301               | -14312.1256 | -1730.3554 | 0.0000      | 0.0000    |
| 7847.7645              | 6076.2109   | 306.8870   | -1771.5535  | 6141.1827 |
| 305.7637               | 118.7068    | 28.5096    | 511540.4688 | -18.4799  |

-18.4626

|                        |             |            |             |           |
|------------------------|-------------|------------|-------------|-----------|
| [22450]ENERGY: 5880000 | 3244.7396   | 5305.7390  | 5433.7573   |           |
| 311.5968               | -14253.3361 | -1754.6010 | 0.0000      | 0.0000    |
| 7789.0074              | 6076.9030   | 304.5893   | -1712.1044  | 6140.4999 |
| 305.9275               | 17.4757     | -34.0399   | 511540.4688 | -19.5602  |

-19.5664

|                        |             |            |             |           |
|------------------------|-------------|------------|-------------|-----------|
| [22486]ENERGY: 5890000 | 3227.9960   | 5224.7763  | 5470.1385   |           |
| 330.3117               | -14369.2890 | -1638.1554 | 0.0000      | 0.0000    |
| 7831.6800              | 6077.4582   | 306.2580   | -1754.2219  | 6140.0122 |
| 305.9698               | 101.6859    | 91.9292    | 511540.4688 | -19.4881  |

-19.5022

|                        |             |            |             |           |
|------------------------|-------------|------------|-------------|-----------|
| [22539]ENERGY: 5900000 | 3185.9137   | 5278.7238  | 5481.1747   |           |
| 328.5615               | -14393.8274 | -1684.6197 | 0.0000      | 0.0000    |
| 7875.5958              | 6071.5224   | 307.9753   | -1804.0734  | 6139.9513 |
| 305.9826               | 75.6019     | 59.4099    | 511540.4688 | -17.0557  |

-17.0437

|                        |             |            |            |           |
|------------------------|-------------|------------|------------|-----------|
| [22575]ENERGY: 5910000 | 3253.7407   | 5417.3473  | 5438.5917  |           |
| 305.2183               | -14408.2818 | -1717.9429 | 0.0000     | 0.0000    |
| 7791.5855              | 6080.2588   | 304.6901   | -1711.3267 | 6141.1844 |

## Supplementary Text 6

|                        |             |            |             |           |
|------------------------|-------------|------------|-------------|-----------|
| 306.1350               | 95.7679     | 93.7054    | 511540.4688 | -19.6069  |
| -19.6173               |             |            |             |           |
| [22625]ENERGY: 5920000 | 3266.8405   | 5376.7767  | 5470.8025   |           |
| 321.3305               | -14474.4384 | -1685.9563 | 0.0000      | 0.0000    |
| 7800.0929              | 6075.4484   | 305.0228   | -1724.6445  | 6140.0926 |
| 305.9332               | 124.8883    | 110.4317   | 511540.4688 | -12.1243  |
| -12.1196               |             |            |             |           |
| [22661]ENERGY: 5930000 | 3235.8161   | 5222.0834  | 5457.5133   |           |
| 328.8527               | -14295.9439 | -1689.1771 | 0.0000      | 0.0000    |
| 7819.3391              | 6078.4836   | 305.7754   | -1740.8556  | 6139.7861 |
| 305.9910               | 16.8691     | -58.9219   | 511540.4688 | -13.8576  |
| -13.8632               |             |            |             |           |
| [22711]ENERGY: 5940000 | 3300.3473   | 5336.7459  | 5442.5135   |           |
| 323.2713               | -14448.6981 | -1673.0325 | 0.0000      | 0.0000    |
| 7800.1250              | 6081.2724   | 305.0240   | -1718.8526  | 6142.7486 |
| 305.7126               | 86.2143     | -32.7618   | 511540.4688 | -13.5398  |
| -13.5288               |             |            |             |           |
| [22747]ENERGY: 5950000 | 3269.4866   | 5300.2497  | 5384.3246   |           |
| 320.7602               | -14314.5823 | -1725.1817 | 0.0000      | 0.0000    |
| 7844.5841              | 6079.6412   | 306.7626   | -1764.9429  | 6141.3066 |
| 305.8488               | 62.8231     | 88.3195    | 511540.4688 | -16.4474  |
| -16.4320               |             |            |             |           |
| [22797]ENERGY: 5960000 | 3182.1555   | 5336.7457  | 5455.0566   |           |
| 322.7054               | -14303.5727 | -1718.7478 | 0.0000      | 0.0000    |
| 7802.9556              | 6077.2983   | 305.1347   | -1725.6573  | 6142.4230 |
| 306.0384               | 71.9954     | 98.8997    | 511540.4688 | -19.2483  |
| -19.2683               |             |            |             |           |
| [22833]ENERGY: 5970000 | 3309.3206   | 5268.4826  | 5458.5137   |           |
| 314.7808               | -14320.7128 | -1779.4579 | 0.0000      | 0.0000    |
| 7829.2773              | 6080.2043   | 306.1640   | -1749.0730  | 6143.4645 |
| 306.0759               | -119.0428   | -163.0637  | 511540.4688 | -16.7498  |
| -16.7356               |             |            |             |           |
| [22883]ENERGY: 5980000 | 3262.5430   | 5324.7607  | 5459.0421   |           |
| 318.8990               | -14356.6399 | -1717.6328 | 0.0000      | 0.0000    |
| 7789.8986              | 6080.8706   | 304.6241   | -1709.0280  | 6142.6062 |
| 306.0360               | -106.8974   | -151.7336  | 511540.4688 | -11.6411  |
| -11.6473               |             |            |             |           |
| [22919]ENERGY: 5990000 | 3257.9631   | 5352.1103  | 5453.8125   |           |
| 303.8047               | -14355.8541 | -1695.6871 | 0.0000      | 0.0000    |
| 7761.0178              | 6077.1673   | 303.4947   | -1683.8505  | 6142.1186 |
| 306.0027               | 47.0358     | 30.8798    | 511540.4688 | -18.4540  |
| -18.4767               |             |            |             |           |
| [22972]ENERGY: 6000000 | 3198.9940   | 5374.3055  | 5445.4211   |           |
| 337.5293               | -14405.7022 | -1733.3383 | 0.0000      | 0.0000    |
| 7862.7991              | 6080.0085   | 307.4749   | -1782.7906  | 6143.1472 |
| 305.8932               | -34.4620    | -35.7652   | 511540.4688 | -14.9833  |
| -14.9642               |             |            |             |           |
| [23008]ENERGY: 6010000 | 3195.0452   | 5400.4568  | 5417.9359   |           |
| 339.1554               | -14327.6409 | -1729.4637 | 0.0000      | 0.0000    |
| 7787.1380              | 6082.6266   | 304.5162   | -1704.5114  | 6144.0978 |
| 306.0077               | 326.1235    | 267.6465   | 511540.4688 | -17.6912  |
| -17.6978               |             |            |             |           |
| [23058]ENERGY: 6020000 | 3267.0685   | 5359.0828  | 5452.4283   |           |
| 336.5812               | -14373.3691 | -1689.4399 | 0.0000      | 0.0000    |



## Supplementary Text 6

|                        |             |            |             |           |
|------------------------|-------------|------------|-------------|-----------|
| 7732.7562              | 6085.1079   | 302.3896   | -1647.6483  | 6144.6281 |
| 306.0681               | -32.3738    | -136.9579  | 511540.4688 | -14.7680  |
| -14.7688               |             |            |             |           |
| [23094]ENERGY: 6030000 | 3279.8612   | 5342.6920  | 5435.3280   |           |
| 324.6134               | -14522.6639 | -1647.0256 | 0.0000      | 0.0000    |
| 7863.5969              | 6076.4021   | 307.5061   | -1787.1948  | 6142.3122 |
| 306.0240               | 33.0453     | 20.9662    | 511540.4688 | -16.7152  |
| -16.7015               |             |            |             |           |
| [23144]ENERGY: 6040000 | 3272.7253   | 5390.8133  | 5434.3619   |           |
| 322.9888               | -14508.0217 | -1661.0054 | 0.0000      | 0.0000    |
| 7829.9718              | 6081.8340   | 306.1912   | -1748.1378  | 6143.6669 |
| 305.7743               | -9.8756     | 30.7211    | 511540.4688 | -13.5212  |
| -13.5160               |             |            |             |           |
| [23180]ENERGY: 6050000 | 3322.1513   | 5363.3042  | 5470.7153   |           |
| 320.5980               | -14481.1420 | -1704.0126 | 0.0000      | 0.0000    |
| 7786.8563              | 6078.4706   | 304.5051   | -1708.3857  | 6142.4835 |
| 305.9279               | -122.1205   | -107.3840  | 511540.4688 | -13.9334  |
| -13.9386               |             |            |             |           |
| [23230]ENERGY: 6060000 | 3229.6433   | 5417.4426  | 5438.2139   |           |
| 339.4939               | -14404.8326 | -1644.1936 | 0.0000      | 0.0000    |
| 7707.2696              | 6083.0370   | 301.3929   | -1624.2326  | 6142.3399 |
| 305.7559               | 34.2469     | 60.7940    | 511540.4688 | -6.7958   |
| -6.8045                |             |            |             |           |
| [23266]ENERGY: 6070000 | 3244.8313   | 5273.7031  | 5485.4890   |           |
| 323.1085               | -14424.0394 | -1651.7592 | 0.0000      | 0.0000    |
| 7827.2702              | 6078.6035   | 306.0855   | -1748.6667  | 6142.6077 |
| 305.8349               | 41.5124     | 52.5274    | 511540.4688 | -10.8679  |
| -10.8616               |             |            |             |           |
| [23316]ENERGY: 6080000 | 3230.4615   | 5269.5461  | 5471.3831   |           |
| 335.3063               | -14371.4431 | -1694.6723 | 0.0000      | 0.0000    |
| 7839.5928              | 6080.1742   | 306.5674   | -1759.4185  | 6142.5577 |
| 306.0503               | -34.7135    | -36.3292   | 511540.4688 | -12.9803  |
| -12.9838               |             |            |             |           |
| [23352]ENERGY: 6090000 | 3206.2533   | 5287.0212  | 5411.9276   |           |
| 331.1739               | -14293.2764 | -1677.9321 | 0.0000      | 0.0000    |
| 7814.4420              | 6079.6095   | 305.5839   | -1734.8325  | 6142.2265 |
| 305.7558               | 158.4129    | 41.1429    | 511540.4688 | -14.0349  |
| -14.0473               |             |            |             |           |
| [23405]ENERGY: 6100000 | 3179.0361   | 5352.2316  | 5507.3488   |           |
| 335.1653               | -14386.4277 | -1708.1866 | 0.0000      | 0.0000    |
| 7803.8780              | 6083.0455   | 305.1708   | -1720.8325  | 6143.5123 |
| 305.7208               | 201.3890    | 174.1269   | 511540.4688 | -13.4275  |
| -13.4109               |             |            |             |           |
| [23441]ENERGY: 6110000 | 3280.3728   | 5366.8070  | 5447.4115   |           |
| 306.1684               | -14458.0986 | -1723.6007 | 0.0000      | 0.0000    |
| 7863.4132              | 6082.4736   | 307.4989   | -1780.9396  | 6143.4470 |
| 305.8967               | -237.3075   | -187.9404  | 511540.4688 | -9.1972   |
| -9.2044                |             |            |             |           |
| [23491]ENERGY: 6120000 | 3247.2509   | 5365.1592  | 5481.7497   |           |
| 309.9575               | -14427.4918 | -1684.6350 | 0.0000      | 0.0000    |
| 7789.1604              | 6081.1508   | 304.5952   | -1708.0096  | 6144.2656 |
| 306.0141               | -28.7848    | 30.4321    | 511540.4688 | -11.1810  |
| -11.1713               |             |            |             |           |
| [23527]ENERGY: 6130000 | 3296.3398   | 5395.8157  | 5500.9439   |           |

Supplementary Text 6

|                        |             |            |             |           |
|------------------------|-------------|------------|-------------|-----------|
| 320.1513               | -14479.5009 | -1716.5416 | 0.0000      | 0.0000    |
| 7763.3302              | 6080.5384   | 303.5851   | -1682.7918  | 6143.8744 |
| 305.8559               | 26.1906     | -7.1998    | 511540.4688 | -15.2782  |
| -15.3050               |             |            |             |           |
| [23577]ENERGY: 6140000 | 3148.1364   | 5359.3440  | 5439.9312   |           |
| 304.9025               | -14399.0673 | -1650.6771 | 0.0000      | 0.0000    |
| 7873.2374              | 6075.8072   | 307.8831   | -1797.4302  | 6141.8494 |
| 305.9614               | 48.0091     | 33.1303    | 511540.4688 | -10.9387  |
| -10.9343               |             |            |             |           |
| [23613]ENERGY: 6150000 | 3280.9465   | 5258.3510  | 5432.6801   |           |
| 330.6351               | -14335.0354 | -1727.0880 | 0.0000      | 0.0000    |
| 7834.8276              | 6075.3169   | 306.3811   | -1759.5107  | 6142.1224 |
| 305.9352               | 91.6738     | 54.9023    | 511540.4688 | -12.7530  |
| -12.7424               |             |            |             |           |
| [23663]ENERGY: 6160000 | 3263.6103   | 5339.5150  | 5433.9685   |           |
| 309.5162               | -14361.6378 | -1722.9725 | 0.0000      | 0.0000    |
| 7819.3852              | 6081.3850   | 305.7772   | -1738.0001  | 6143.2994 |
| 305.9275               | -125.3985   | 15.9425    | 511540.4688 | -11.2416  |
| -11.2416               |             |            |             |           |
| [23699]ENERGY: 6170000 | 3198.8692   | 5307.7895  | 5503.3799   |           |
| 311.9050               | -14384.3064 | -1772.6144 | 0.0000      | 0.0000    |
| 7914.1698              | 6079.1926   | 309.4837   | -1834.9772  | 6143.7476 |
| 305.8270               | -2.9692     | -108.4340  | 511540.4688 | -15.3784  |
| -15.3662               |             |            |             |           |
| [23749]ENERGY: 6180000 | 3251.5938   | 5347.5773  | 5418.6490   |           |
| 313.7008               | -14392.8234 | -1642.2137 | 0.0000      | 0.0000    |
| 7785.6448              | 6082.1286   | 304.4578   | -1703.5162  | 6143.6959 |
| 305.9238               | 222.0606    | 197.8575   | 511540.4688 | -9.9302   |
| -9.9422                |             |            |             |           |
| [23785]ENERGY: 6190000 | 3201.2865   | 5357.0021  | 5467.9117   |           |
| 335.3740               | -14416.3851 | -1692.5906 | 0.0000      | 0.0000    |
| 7825.5295              | 6078.1281   | 306.0175   | -1747.4014  | 6142.8939 |
| 305.8075               | 149.9290    | 205.3480   | 511540.4688 | -14.2613  |
| -14.2459               |             |            |             |           |
| [23838]ENERGY: 6200000 | 3187.1925   | 5369.4084  | 5437.8738   |           |
| 326.2745               | -14351.0293 | -1691.5462 | 0.0000      | 0.0000    |
| 7802.1832              | 6080.3570   | 305.1045   | -1721.8262  | 6144.0485 |
| 305.8522               | 226.2322    | 55.0109    | 511540.4688 | -12.7232  |
| -12.7302               |             |            |             |           |
| [23874]ENERGY: 6210000 | 3292.4643   | 5293.4525  | 5447.6662   |           |
| 324.8400               | -14434.6780 | -1655.0685 | 0.0000      | 0.0000    |
| 7810.2443              | 6078.9208   | 305.4197   | -1731.3235  | 6142.7786 |
| 305.8490               | 112.5949    | 33.6080    | 511540.4688 | -13.1053  |
| -13.1314               |             |            |             |           |
| [23924]ENERGY: 6220000 | 3278.4261   | 5355.7051  | 5469.7715   |           |
| 313.1033               | -14417.9453 | -1659.1901 | 0.0000      | 0.0000    |
| 7742.3867              | 6082.2573   | 302.7662   | -1660.1295  | 6143.3729 |
| 305.8666               | 153.4818    | 81.8438    | 511540.4688 | -10.2149  |
| -10.2140               |             |            |             |           |
| [23960]ENERGY: 6230000 | 3212.1218   | 5286.2647  | 5494.3748   |           |
| 314.5935               | -14377.6008 | -1725.6662 | 0.0000      | 0.0000    |
| 7873.8298              | 6077.9176   | 307.9062   | -1795.9121  | 6145.0301 |
| 305.9115               | -111.7480   | -148.8359  | 511540.4688 | -9.6294   |
| -9.6178                |             |            |             |           |

## Supplementary Text 6

|                        |             |            |             |           |
|------------------------|-------------|------------|-------------|-----------|
| [24010]ENERGY: 6240000 | 3217.6050   | 5349.8733  | 5476.5773   |           |
| 333.5469               | -14362.1281 | -1691.0547 | 0.0000      | 0.0000    |
| 7757.7527              | 6082.1724   | 303.3670   | -1675.5803  | 6144.6518 |
| 305.7484               | 205.2354    | 36.8210    | 511540.4688 | -7.6254   |
| -7.6273                |             |            |             |           |
| [24046]ENERGY: 6250000 | 3157.2450   | 5338.1716  | 5493.0980   |           |
| 333.2677               | -14409.5828 | -1706.2340 | 0.0000      | 0.0000    |
| 7874.0591              | 6080.0247   | 307.9152   | -1794.0344  | 6144.9656 |
| 305.9234               | 35.7278     | 47.2138    | 511540.4688 | -10.8828  |
| -10.8539               |             |            |             |           |
| [24096]ENERGY: 6260000 | 3288.6200   | 5355.6577  | 5447.8892   |           |
| 313.0771               | -14446.8043 | -1704.3137 | 0.0000      | 0.0000    |
| 7825.7431              | 6079.8691   | 306.0258   | -1745.8740  | 6144.2723 |
| 305.7970               | -81.4007    | -2.9841    | 511540.4688 | -8.8402   |
| -8.8763                |             |            |             |           |
| [24132]ENERGY: 6270000 | 3284.6118   | 5294.4823  | 5466.3576   |           |
| 312.6449               | -14385.8417 | -1744.7808 | 0.0000      | 0.0000    |
| 7853.7113              | 6081.1855   | 307.1195   | -1772.5259  | 6145.2343 |
| 305.8411               | -25.3290    | -5.9760    | 511540.4688 | -14.6825  |
| -14.6504               |             |            |             |           |
| [24182]ENERGY: 6280000 | 3288.3270   | 5289.6623  | 5439.6559   |           |
| 317.2276               | -14330.8369 | -1731.6829 | 0.0000      | 0.0000    |
| 7813.0359              | 6085.3890   | 305.5289   | -1727.6470  | 6145.6487 |
| 305.8185               | 64.6097     | 54.0550    | 511540.4688 | -14.3286  |
| -14.3543               |             |            |             |           |
| [24218]ENERGY: 6290000 | 3252.9860   | 5260.1523  | 5481.9500   |           |
| 330.3256               | -14473.7136 | -1590.5458 | 0.0000      | 0.0000    |
| 7820.3739              | 6081.5283   | 305.8158   | -1738.8456  | 6144.3984 |
| 306.0008               | 169.1121    | 168.3428   | 511540.4688 | -10.9148  |
| -10.8868               |             |            |             |           |
| [24271]ENERGY: 6300000 | 3201.2998   | 5278.0611  | 5403.3736   |           |
| 327.7921               | -14387.2889 | -1756.1658 | 0.0000      | 0.0000    |
| 8008.5592              | 6075.6311   | 313.1748   | -1932.9281  | 6144.3479 |
| 306.0609               | -81.5320    | -57.8172   | 511540.4688 | -15.9668  |
| -15.9862               |             |            |             |           |
| [24307]ENERGY: 6310000 | 3204.4037   | 5402.4414  | 5464.0112   |           |
| 329.1212               | -14410.7788 | -1704.4555 | 0.0000      | 0.0000    |
| 7795.5838              | 6080.3270   | 304.8464   | -1715.2568  | 6143.3960 |
| 306.0187               | 177.4414    | 150.1460   | 511540.4688 | -15.2026  |
| -15.1901               |             |            |             |           |
| [24357]ENERGY: 6320000 | 3204.3928   | 5310.0844  | 5455.9320   |           |
| 324.4027               | -14349.4848 | -1650.8830 | 0.0000      | 0.0000    |
| 7788.9963              | 6083.4404   | 304.5888   | -1705.5559  | 6145.8208 |
| 306.1217               | 296.4325    | 130.9457   | 511540.4688 | -14.8726  |
| -14.8743               |             |            |             |           |
| [24393]ENERGY: 6330000 | 3204.3971   | 5409.3029  | 5414.2266   |           |
| 326.6411               | -14396.2524 | -1655.0420 | 0.0000      | 0.0000    |
| 7783.3967              | 6086.6701   | 304.3698   | -1696.7266  | 6144.6747 |
| 305.9731               | 161.1914    | 198.3007   | 511540.4688 | -16.1328  |
| -16.1425               |             |            |             |           |
| [24443]ENERGY: 6340000 | 3147.9541   | 5369.9915  | 5513.5757   |           |
| 323.9395               | -14399.0680 | -1714.1531 | 0.0000      | 0.0000    |
| 7840.2679              | 6082.5077   | 306.5938   | -1757.7602  | 6144.3299 |
| 306.1513               | 175.3000    | 87.1860    | 511540.4688 | -13.7836  |

Supplementary Text 6

-13.7784  
 [24479]ENERGY: 6350000      3215.7392      5469.4825      5421.6256  
 310.8972      -14340.7441      -1770.4535      0.0000      0.0000  
 7774.4122      6080.9591      304.0185      -1693.4531      6145.1329  
 305.9545      72.6757      51.0247      511540.4688      -16.9190  
 -16.8955  
 [24529]ENERGY: 6360000      3213.2956      5360.9966      5478.1308  
 303.5904      -14356.5484      -1703.3147      0.0000      0.0000  
 7788.4635      6084.6138      304.5680      -1703.8496      6145.1075  
 305.9405      -16.5815      -59.1256      511540.4688      -16.3523  
 -16.3706  
 [24565]ENERGY: 6370000      3150.9978      5385.5701      5473.9436  
 337.0385      -14312.4811      -1777.6583      0.0000      0.0000  
 7824.1520      6081.5626      305.9636      -1742.5893      6145.3743  
 306.1142      78.9562      130.0795      511540.4688      -12.6934  
 -12.6815  
 [24615]ENERGY: 6380000      3283.3755      5343.5382      5435.0293  
 312.5907      -14421.4419      -1726.0489      0.0000      0.0000  
 7854.3271      6081.3701      307.1436      -1772.9570      6145.8784  
 306.0951      -41.2119      7.4257      511540.4688      -17.8023  
 -17.8188  
 [24651]ENERGY: 6390000      3209.3659      5336.0392      5451.8103  
 320.6560      -14382.8602      -1665.6771      0.0000      0.0000  
 7811.4548      6080.7890      305.4671      -1730.6658      6146.1118  
 306.0795      76.9243      -5.7757      511540.4688      -13.6897  
 -13.6962  
 [24704]ENERGY: 6400000      3219.9907      5309.5646      5412.2735  
 314.4138      -14349.1067      -1684.0217      0.0000      0.0000  
 7860.0786      6083.1928      307.3685      -1776.8858      6145.9006  
 305.9273      140.8679      45.2755      511540.4688      -13.5550  
 -13.5457  
 [24740]ENERGY: 6410000      3275.3025      5324.5076      5472.4714  
 318.2972      -14437.4048      -1680.8215      0.0000      0.0000  
 7808.8888      6081.2412      305.3667      -1727.6476      6145.3161  
 305.9371      -53.1097      71.0122      511540.4688      -13.5423  
 -13.5488  
 [24790]ENERGY: 6420000      3261.8904      5368.2797      5462.7290  
 320.0252      -14403.5863      -1755.1245      0.0000      0.0000  
 7831.4985      6085.7119      306.2509      -1745.7866      6147.0059  
 306.0601      -173.2998      -124.1240      511540.4688      -14.6851  
 -14.6850  
 [24826]ENERGY: 6430000      3213.2903      5325.9839      5500.4164  
 343.1222      -14384.5718      -1725.3691      0.0000      0.0000  
 7812.1816      6085.0535      305.4955      -1727.1281      6145.9372  
 305.9162      86.2878      123.0533      511540.4688      -10.7660  
 -10.7632  
 [24876]ENERGY: 6440000      3283.8853      5305.9343      5440.1595  
 333.3148      -14245.4507      -1826.5807      0.0000      0.0000  
 7792.1413      6083.4037      304.7118      -1708.7376      6147.1398  
 305.8278      -38.6522      -165.9357      511540.4688      -13.3327  
 -13.3443  
 [24912]ENERGY: 6450000      3171.4763      5417.6415      5470.5238  
 316.6261      -14360.6962      -1740.0255      0.0000      0.0000  
 7804.6312      6080.1771      305.2002      -1724.4541      6146.3057

## Supplementary Text 6

|                        |             |            |             |           |
|------------------------|-------------|------------|-------------|-----------|
| 305.9644               | 125.6599    | 151.2508   | 511540.4688 | -15.6773  |
| -15.6550               |             |            |             |           |
| [24962]ENERGY: 6460000 | 3187.3348   | 5344.7423  | 5485.9371   |           |
| 317.7658               | -14359.9439 | -1685.0223 | 0.0000      | 0.0000    |
| 7789.4470              | 6080.2607   | 304.6064   | -1709.1863  | 6146.4197 |
| 305.9965               | -27.2237    | 15.3884    | 511540.4688 | -16.9640  |
| -16.9946               |             |            |             |           |
| [24998]ENERGY: 6470000 | 3268.8478   | 5270.4625  | 5462.7350   |           |
| 314.3916               | -14354.6581 | -1692.0317 | 0.0000      | 0.0000    |
| 7814.8823              | 6084.6293   | 305.6011   | -1730.2529  | 6146.0402 |
| 306.1048               | -37.4787    | 42.3219    | 511540.4688 | -13.3519  |
| -13.3304               |             |            |             |           |
| [25048]ENERGY: 6480000 | 3250.9857   | 5308.2643  | 5492.7601   |           |
| 318.4270               | -14365.3772 | -1716.0683 | 0.0000      | 0.0000    |
| 7795.9725              | 6084.9642   | 304.8616   | -1711.0083  | 6146.3994 |
| 306.1735               | 54.0648     | -74.7477   | 511540.4688 | -16.9822  |
| -16.9836               |             |            |             |           |
| [25084]ENERGY: 6490000 | 3235.3213   | 5330.9798  | 5436.3032   |           |
| 330.0160               | -14372.8484 | -1787.6738 | 0.0000      | 0.0000    |
| 7914.9974              | 6087.0955   | 309.5161   | -1827.9019  | 6147.5760 |
| 306.0231               | -41.9185    | -67.2130   | 511540.4688 | -15.6093  |
| -15.6299               |             |            |             |           |
| [25137]ENERGY: 6500000 | 3221.4647   | 5254.1576  | 5458.6861   |           |
| 318.1858               | -14363.7822 | -1704.5507 | 0.0000      | 0.0000    |
| 7899.0356              | 6083.1969   | 308.8919   | -1815.8387  | 6147.2264 |
| 305.8789               | -141.4775   | -185.0690  | 511540.4688 | -15.9298  |
| -15.9067               |             |            |             |           |
| [25173]ENERGY: 6510000 | 3175.1472   | 5413.5955  | 5443.3393   |           |
| 314.6368               | -14317.6360 | -1752.2817 | 0.0000      | 0.0000    |
| 7809.5080              | 6086.3091   | 305.3909   | -1723.1989  | 6147.3138 |
| 306.0368               | 29.8455     | 9.9727     | 511540.4688 | -14.2809  |
| -14.2745               |             |            |             |           |
| [25223]ENERGY: 6520000 | 3263.3363   | 5231.1993  | 5458.4243   |           |
| 337.1941               | -14392.4483 | -1673.6786 | 0.0000      | 0.0000    |
| 7861.2549              | 6085.2821   | 307.4145   | -1775.9728  | 6147.6838 |
| 305.9481               | -42.5742    | -69.4588   | 511540.4688 | -18.9530  |
| -18.9664               |             |            |             |           |
| [25259]ENERGY: 6530000 | 3145.5700   | 5263.2848  | 5487.8949   |           |
| 326.0217               | -14276.3615 | -1726.5218 | 0.0000      | 0.0000    |
| 7864.2068              | 6084.0949   | 307.5299   | -1780.1119  | 6147.6818 |
| 306.0626               | 78.2070     | 29.2055    | 511540.4688 | -15.0862  |
| -15.1131               |             |            |             |           |
| [25309]ENERGY: 6540000 | 3239.0704   | 5308.6000  | 5423.7135   |           |
| 312.7489               | -14293.5436 | -1711.9024 | 0.0000      | 0.0000    |
| 7805.8968              | 6084.5835   | 305.2497   | -1721.3133  | 6147.2291 |
| 306.2303               | 97.0529     | 26.0039    | 511540.4688 | -17.7787  |
| -17.7429               |             |            |             |           |
| [25345]ENERGY: 6550000 | 3237.0503   | 5312.3573  | 5423.2041   |           |
| 322.1839               | -14318.9916 | -1726.9326 | 0.0000      | 0.0000    |
| 7834.8919              | 6083.7632   | 306.3836   | -1751.1287  | 6147.7104 |
| 306.1897               | -115.4693   | -117.9688  | 511540.4688 | -16.8791  |
| -16.8848               |             |            |             |           |
| [25395]ENERGY: 6560000 | 3168.8267   | 5226.2841  | 5412.8233   |           |
| 308.5569               | -14318.0353 | -1614.3252 | 0.0000      | 0.0000    |

## Supplementary Text 6

|                        |             |            |             |           |
|------------------------|-------------|------------|-------------|-----------|
| 7899.5516              | 6083.6821   | 308.9121   | -1815.8696  | 6147.1756 |
| 305.9666               | 137.3472    | 68.6372    | 511540.4688 | -19.8038  |
| -19.8149               |             |            |             |           |
| [25431]ENERGY: 6570000 | 3198.7174   | 5427.0443  | 5404.8331   |           |
| 314.1750               | -14402.6880 | -1699.4299 | 0.0000      | 0.0000    |
| 7838.9458              | 6081.5978   | 306.5421   | -1757.3480  | 6148.7816 |
| 306.1727               | 103.8361    | -98.7391   | 511540.4688 | -13.5496  |
| -13.5408               |             |            |             |           |
| [25481]ENERGY: 6580000 | 3189.4129   | 5437.6707  | 5438.7363   |           |
| 322.2350               | -14412.3552 | -1716.7833 | 0.0000      | 0.0000    |
| 7821.0111              | 6079.9274   | 305.8408   | -1741.0837  | 6146.6100 |
| 306.3731               | 31.0228     | 25.5119    | 511540.4688 | -19.3399  |
| -19.3427               |             |            |             |           |
| [25517]ENERGY: 6590000 | 3225.5713   | 5293.7218  | 5486.2325   |           |
| 334.7555               | -14353.9031 | -1676.9715 | 0.0000      | 0.0000    |
| 7773.7778              | 6083.1842   | 303.9937   | -1690.5936  | 6147.2492 |
| 306.3321               | -80.6633    | -81.2601   | 511540.4688 | -14.9524  |
| -14.9428               |             |            |             |           |
| [25570]ENERGY: 6600000 | 3258.4078   | 5363.0220  | 5457.5656   |           |
| 316.4437               | -14373.6654 | -1732.8770 | 0.0000      | 0.0000    |
| 7797.1642              | 6086.0610   | 304.9082   | -1711.1032  | 6147.2091 |
| 306.6248               | -151.7428   | -136.2446  | 511540.4688 | -15.4240  |
| -15.4369               |             |            |             |           |
| [25606]ENERGY: 6610000 | 3194.5240   | 5328.1987  | 5452.5958   |           |
| 308.8168               | -14366.8508 | -1712.2477 | 0.0000      | 0.0000    |
| 7877.0883              | 6082.1250   | 308.0337   | -1794.9632  | 6147.1542 |
| 306.4218               | 6.2351      | 25.9422    | 511540.4688 | -17.4402  |
| -17.4369               |             |            |             |           |
| [25656]ENERGY: 6620000 | 3298.1754   | 5288.2788  | 5392.3028   |           |
| 297.8196               | -14388.4145 | -1686.0136 | 0.0000      | 0.0000    |
| 7881.4865              | 6083.6348   | 308.2056   | -1797.8516  | 6147.8036 |
| 306.6155               | 109.2119    | 9.7522     | 511540.4688 | -16.7697  |
| -16.7765               |             |            |             |           |
| [25692]ENERGY: 6630000 | 3120.1569   | 5347.0033  | 5439.0930   |           |
| 320.8685               | -14356.7634 | -1648.0824 | 0.0000      | 0.0000    |
| 7862.1401              | 6084.4161   | 307.4491   | -1777.7240  | 6145.4790 |
| 306.7187               | 84.5065     | 102.7001   | 511540.4688 | -16.4045  |
| -16.3861               |             |            |             |           |
| [25742]ENERGY: 6640000 | 3213.8567   | 5334.8930  | 5401.3297   |           |
| 318.9058               | -14392.3099 | -1672.5270 | 0.0000      | 0.0000    |
| 7876.7266              | 6080.8750   | 308.0195   | -1795.8515  | 6147.2586 |
| 306.5050               | 87.6666     | 126.6022   | 511540.4688 | -18.7955  |
| -18.8002               |             |            |             |           |
| [25778]ENERGY: 6650000 | 3171.9570   | 5330.9581  | 5523.8168   |           |
| 311.5459               | -14447.8513 | -1671.0155 | 0.0000      | 0.0000    |
| 7862.8913              | 6082.3023   | 307.4785   | -1780.5890  | 6147.2492 |
| 306.5015               | 93.8596     | 74.3950    | 511540.4688 | -17.7778  |
| -17.7833               |             |            |             |           |
| [25828]ENERGY: 6660000 | 3199.6408   | 5321.9849  | 5497.0026   |           |
| 312.6678               | -14332.4785 | -1744.8962 | 0.0000      | 0.0000    |
| 7831.9295              | 6085.8509   | 306.2677   | -1746.0787  | 6149.1900 |
| 306.5501               | 93.1387     | 4.3020     | 511540.4688 | -15.9437  |
| -15.9119               |             |            |             |           |
| [25864]ENERGY: 6670000 | 3292.4524   | 5282.4493  | 5415.9804   |           |

## Supplementary Text 6

|                        |             |            |             |           |
|------------------------|-------------|------------|-------------|-----------|
| 325.1179               | -14265.9017 | -1779.7052 | 0.0000      | 0.0000    |
| 7813.4232              | 6083.8164   | 305.5440   | -1729.6068  | 6148.4772 |
| 306.5030               | 27.3945     | 8.1588     | 511540.4688 | -18.2610  |
| -18.3062               |             |            |             |           |
| [25914]ENERGY: 6680000 | 3265.7185   | 5304.5672  | 5422.1480   |           |
| 319.7081               | -14353.6226 | -1724.3039 | 0.0000      | 0.0000    |
| 7851.8202              | 6086.0356   | 307.0455   | -1765.7846  | 6149.4329 |
| 306.4704               | 14.6155     | 45.4312    | 511540.4688 | -19.4272  |
| -19.3982               |             |            |             |           |
| [25950]ENERGY: 6690000 | 3269.0251   | 5321.6499  | 5449.5553   |           |
| 319.1113               | -14391.8902 | -1675.1929 | 0.0000      | 0.0000    |
| 7794.4315              | 6086.6899   | 304.8014   | -1707.7416  | 6149.6760 |
| 306.4402               | 48.5587     | 2.8289     | 511540.4688 | -17.1610  |
| -17.1576               |             |            |             |           |
| [26003]ENERGY: 6700000 | 3137.8756   | 5376.2341  | 5427.4168   |           |
| 336.5635               | -14368.8756 | -1652.5375 | 0.0000      | 0.0000    |
| 7829.0427              | 6085.7195   | 306.1548   | -1743.3231  | 6149.3723 |
| 306.3603               | -69.6390    | -86.6436   | 511540.4688 | -21.1134  |
| -21.1265               |             |            |             |           |
| [26039]ENERGY: 6710000 | 3237.0006   | 5260.4408  | 5457.0096   |           |
| 304.3650               | -14342.4310 | -1676.8367 | 0.0000      | 0.0000    |
| 7847.7100              | 6087.2583   | 306.8848   | -1760.4518  | 6149.4095 |
| 306.2507               | 231.8626    | 142.2769   | 511540.4688 | -16.7055  |
| -16.7165               |             |            |             |           |
| [26089]ENERGY: 6720000 | 3253.7156   | 5195.9679  | 5453.7604   |           |
| 333.1174               | -14285.7170 | -1697.8390 | 0.0000      | 0.0000    |
| 7834.6337              | 6087.6390   | 306.3735   | -1746.9946  | 6148.6553 |
| 306.4709               | 28.9817     | -8.8595    | 511540.4688 | -16.0804  |
| -16.0723               |             |            |             |           |
| [26125]ENERGY: 6730000 | 3208.0435   | 5275.5862  | 5473.6420   |           |
| 321.5364               | -14482.1572 | -1659.3709 | 0.0000      | 0.0000    |
| 7941.9155              | 6079.1954   | 310.5687   | -1862.7201  | 6147.9344 |
| 306.4188               | -44.0667    | 35.5987    | 511540.4688 | -14.8923  |
| -14.8808               |             |            |             |           |
| [26175]ENERGY: 6740000 | 3113.5242   | 5410.6816  | 5501.6713   |           |
| 337.0721               | -14398.9866 | -1763.5009 | 0.0000      | 0.0000    |
| 7880.9495              | 6081.4111   | 308.1847   | -1799.5384  | 6148.6694 |
| 306.1027               | 78.0403     | 100.9165   | 511540.4688 | -21.6445  |
| -21.6545               |             |            |             |           |
| [26211]ENERGY: 6750000 | 3186.9459   | 5420.7540  | 5473.5594   |           |
| 329.3697               | -14443.5731 | -1712.6377 | 0.0000      | 0.0000    |
| 7829.0734              | 6083.4917   | 306.1560   | -1745.5817  | 6147.8108 |
| 306.2326               | -260.0481   | -157.1129  | 511540.4688 | -16.3440  |
| -16.3467               |             |            |             |           |
| [26261]ENERGY: 6760000 | 3276.6116   | 5335.7381  | 5449.7021   |           |
| 320.9385               | -14442.9731 | -1685.2466 | 0.0000      | 0.0000    |
| 7831.6822              | 6086.4527   | 306.2581   | -1745.2295  | 6148.8931 |
| 306.2352               | 27.7014     | 31.3688    | 511540.4688 | -16.9684  |
| -16.9615               |             |            |             |           |
| [26297]ENERGY: 6770000 | 3215.2018   | 5352.3058  | 5440.0854   |           |
| 338.2663               | -14291.1679 | -1758.9735 | 0.0000      | 0.0000    |
| 7791.2405              | 6086.9584   | 304.6766   | -1704.2821  | 6149.6402 |
| 306.4465               | -125.0296   | -102.6798  | 511540.4688 | -19.1255  |
| -19.1402               |             |            |             |           |

## Supplementary Text 6

|                        |             |            |             |           |
|------------------------|-------------|------------|-------------|-----------|
| [26347]ENERGY: 6780000 | 3213.9260   | 5386.7165  | 5384.3676   |           |
| 310.8723               | -14355.5066 | -1683.6528 | 0.0000      | 0.0000    |
| 7830.3848              | 6087.1077   | 306.2073   | -1743.2770  | 6148.7703 |
| 306.2986               | 54.4413     | 60.7166    | 511540.4688 | -15.1371  |
| -15.1157               |             |            |             |           |
| [26383]ENERGY: 6790000 | 3269.1049   | 5389.0753  | 5418.9411   |           |
| 305.3343               | -14405.0164 | -1701.4059 | 0.0000      | 0.0000    |
| 7808.8628              | 6084.8961   | 305.3657   | -1723.9667  | 6149.6539 |
| 306.3907               | 148.7613    | 23.5456    | 511540.4688 | -18.9722  |
| -18.9917               |             |            |             |           |
| [26436]ENERGY: 6800000 | 3221.2204   | 5277.4790  | 5455.3248   |           |
| 331.8158               | -14312.7732 | -1718.4663 | 0.0000      | 0.0000    |
| 7829.3100              | 6083.9104   | 306.1653   | -1745.3996  | 6149.3324 |
| 306.3534               | -3.3613     | -20.0220   | 511540.4688 | -14.7484  |
| -14.7233               |             |            |             |           |
| [26472]ENERGY: 6810000 | 3274.3508   | 5382.7679  | 5463.3176   |           |
| 312.7939               | -14349.7060 | -1787.7906 | 0.0000      | 0.0000    |
| 7790.0142              | 6085.7478   | 304.6286   | -1704.2663  | 6150.2132 |
| 306.3424               | -162.9591   | -172.0065  | 511540.4688 | -15.8384  |
| -15.8488               |             |            |             |           |
| [26522]ENERGY: 6820000 | 3263.4363   | 5356.7024  | 5502.6594   |           |
| 319.8826               | -14457.4708 | -1743.8806 | 0.0000      | 0.0000    |
| 7845.5778              | 6086.9072   | 306.8014   | -1758.6706  | 6151.1132 |
| 306.4570               | -72.4874    | -210.6989  | 511540.4688 | -15.1094  |
| -15.1113               |             |            |             |           |
| [26558]ENERGY: 6830000 | 3278.5003   | 5316.0861  | 5435.8379   |           |
| 307.3181               | -14381.8490 | -1672.6175 | 0.0000      | 0.0000    |
| 7805.7771              | 6089.0529   | 305.2450   | -1716.7241  | 6150.5207 |
| 306.2093               | 39.2182     | 93.0794    | 511540.4688 | -17.2305  |
| -17.2308               |             |            |             |           |
| [26608]ENERGY: 6840000 | 3257.4507   | 5352.4357  | 5466.7206   |           |
| 326.3046               | -14392.2648 | -1682.7511 | 0.0000      | 0.0000    |
| 7758.6876              | 6086.5834   | 303.4036   | -1672.1042  | 6149.7707 |
| 306.1980               | 200.4990    | 173.3432   | 511540.4688 | -16.2167  |
| -16.2328               |             |            |             |           |
| [26644]ENERGY: 6850000 | 3294.3781   | 5285.3176  | 5450.0501   |           |
| 342.1162               | -14387.4818 | -1716.8079 | 0.0000      | 0.0000    |
| 7820.5632              | 6088.1355   | 305.8232   | -1732.4277  | 6149.7868 |
| 306.2041               | -40.4351    | -59.1640   | 511540.4688 | -15.4089  |
| -15.3877               |             |            |             |           |
| [26694]ENERGY: 6860000 | 3166.0398   | 5260.2037  | 5497.6498   |           |
| 328.6364               | -14364.7400 | -1671.8287 | 0.0000      | 0.0000    |
| 7864.7331              | 6080.6941   | 307.5505   | -1784.0390  | 6150.0237 |
| 306.3151               | 148.9361    | 180.1020   | 511540.4688 | -12.0702  |
| -12.0855               |             |            |             |           |
| [26730]ENERGY: 6870000 | 3181.7588   | 5464.9425  | 5396.7718   |           |
| 317.8393               | -14344.3798 | -1793.0224 | 0.0000      | 0.0000    |
| 7861.9474              | 6085.8576   | 307.4416   | -1776.0898  | 6151.2195 |
| 306.2810               | -39.7909    | -8.7497    | 511540.4688 | -15.9650  |
| -15.9721               |             |            |             |           |
| [26780]ENERGY: 6880000 | 3246.9345   | 5321.9958  | 5471.4253   |           |
| 327.5666               | -14372.2621 | -1792.7924 | 0.0000      | 0.0000    |
| 7884.1672              | 6087.0349   | 308.3105   | -1797.1322  | 6150.6919 |
| 306.3700               | -37.9048    | -94.7167   | 511540.4688 | -15.4929  |



Supplementary Text 6

-15.4705

|                        |             |            |             |
|------------------------|-------------|------------|-------------|
| [26816]ENERGY: 6890000 | 3240.6420   | 5397.0562  | 5523.6380   |
| 304.5575               | -14328.5856 | -1790.0800 | 0.0000      |
| 7742.8878              | 6090.1159   | 302.7857   | -1652.7719  |
| 306.3747               | -66.3918    | -77.0498   | 511540.4688 |
| -20.1098               |             |            | -20.0864    |

|                        |             |            |             |
|------------------------|-------------|------------|-------------|
| [26869]ENERGY: 6900000 | 3204.3245   | 5384.9346  | 5399.5161   |
| 297.9733               | -14380.0798 | -1645.3142 | 0.0000      |
| 7825.8142              | 6087.1686   | 306.0286   | -1738.6456  |
| 306.3585               | -195.6751   | -129.6414  | 511540.4688 |
| -10.7944               |             |            | -10.8191    |

|                        |             |            |             |
|------------------------|-------------|------------|-------------|
| [26905]ENERGY: 6910000 | 3211.5839   | 5371.3514  | 5436.1667   |
| 301.4826               | -14413.8157 | -1681.0558 | 0.0000      |
| 7861.8144              | 6087.5277   | 307.4364   | -1774.2867  |
| 306.1431               | 290.9978    | 210.0517   | 511540.4688 |
| -19.3394               |             |            | -19.3294    |

|                        |             |            |             |
|------------------------|-------------|------------|-------------|
| [26955]ENERGY: 6920000 | 3221.3519   | 5407.3333  | 5444.9118   |
| 345.0287               | -14367.7351 | -1764.1640 | 0.0000      |
| 7801.8170              | 6088.5436   | 305.0902   | -1713.2733  |
| 306.0998               | -212.1392   | -127.3165  | 511540.4688 |
| -14.7212               |             |            | -14.7318    |

|                        |             |            |             |
|------------------------|-------------|------------|-------------|
| [26991]ENERGY: 6930000 | 3230.8034   | 5234.1991  | 5473.9583   |
| 330.5549               | -14378.6792 | -1669.7718 | 0.0000      |
| 7866.6844              | 6087.7491   | 307.6268   | -1778.9353  |
| 306.0561               | -71.7254    | -2.8663    | 511540.4688 |
| -12.1931               |             |            | -12.1956    |

|                        |             |            |             |
|------------------------|-------------|------------|-------------|
| [27041]ENERGY: 6940000 | 3314.8763   | 5229.5976  | 5465.9361   |
| 365.5196               | -14356.3436 | -1761.0066 | 0.0000      |
| 7832.3974              | 6090.9770   | 306.2860   | -1741.4204  |
| 306.2806               | -150.0245   | -207.5461  | 511540.4688 |
| -22.4710               |             |            | -22.4194    |

|                        |             |            |             |
|------------------------|-------------|------------|-------------|
| [27077]ENERGY: 6950000 | 3230.1648   | 5324.2754  | 5445.7508   |
| 311.1356               | -14349.4859 | -1696.4805 | 0.0000      |
| 7821.2505              | 6086.6107   | 305.8501   | -1734.6398  |
| 306.4167               | -47.3606    | -56.7155   | 511540.4688 |
| -19.1748               |             |            | -19.2217    |

|                        |             |            |             |
|------------------------|-------------|------------|-------------|
| [27127]ENERGY: 6960000 | 3308.1256   | 5389.3456  | 5424.4552   |
| 328.4280               | -14414.3619 | -1706.9812 | 0.0000      |
| 7760.6570              | 6089.6683   | 303.4806   | -1670.9887  |
| 306.2512               | -37.0032    | -33.9232   | 511540.4688 |
| -20.7194               |             |            | -20.7332    |

|                        |             |            |             |
|------------------------|-------------|------------|-------------|
| [27163]ENERGY: 6970000 | 3245.8233   | 5298.3804  | 5453.6236   |
| 333.9064               | -14450.5726 | -1662.2282 | 0.0000      |
| 7869.6993              | 6088.6323   | 307.7447   | -1781.0671  |
| 306.1799               | 34.2649     | 2.0833     | 511540.4688 |
| -17.5830               |             |            | -17.5545    |

|                        |             |            |             |
|------------------------|-------------|------------|-------------|
| [27213]ENERGY: 6980000 | 3350.5372   | 5247.0076  | 5534.1932   |
| 297.4254               | -14334.8103 | -1791.9945 | 0.0000      |
| 7787.7014              | 6090.0601   | 304.5382   | -1697.6413  |
| 306.1220               | 3.0210      | -83.8064   | 511540.4688 |
| -18.5535               |             |            | -18.5499    |

|                        |             |            |             |
|------------------------|-------------|------------|-------------|
| [27249]ENERGY: 6990000 | 3213.4969   | 5331.0162  | 5443.7889   |
| 326.1832               | -14312.8378 | -1737.3561 | 0.0000      |
| 7822.3427              | 6086.6340   | 305.8928   | -1735.7087  |
|                        |             |            | 511540.4688 |
|                        |             |            | -17.5545    |

Supplementary Text 6

|                        |             |            |             |           |
|------------------------|-------------|------------|-------------|-----------|
| 306.2566               | 76.4616     | 36.7742    | 511540.4688 | -20.5780  |
| -20.5636               |             |            |             |           |
| [27302]ENERGY: 7000000 | 3256.2809   | 5286.2893  | 5438.3612   |           |
| 312.4868               | -14317.4315 | -1684.8335 | 0.0000      | 0.0000    |
| 7796.7205              | 6087.8737   | 304.8909   | -1708.8468  | 6150.4420 |
| 306.4362               | 94.9356     | -1.3193    | 511540.4688 | -17.0125  |
| -17.0062               |             |            |             |           |
| [27338]ENERGY: 7010000 | 3199.4871   | 5357.3018  | 5504.9534   |           |
| 334.1861               | -14420.5090 | -1737.0613 | 0.0000      | 0.0000    |
| 7847.2776              | 6085.6357   | 306.8679   | -1761.6419  | 6151.4968 |
| 306.3588               | -32.5253    | -57.9462   | 511540.4688 | -24.6823  |
| -24.7088               |             |            |             |           |
| [27388]ENERGY: 7020000 | 3231.0464   | 5199.6552  | 5479.2214   |           |
| 323.3589               | -14371.4741 | -1685.7544 | 0.0000      | 0.0000    |
| 7907.2913              | 6083.3448   | 309.2147   | -1823.9465  | 6150.7603 |
| 306.1532               | -39.4959    | -6.7880    | 511540.4688 | -17.7376  |
| -17.7263               |             |            |             |           |
| [27424]ENERGY: 7030000 | 3222.3627   | 5337.3083  | 5429.9881   |           |
| 331.7842               | -14407.6616 | -1683.3543 | 0.0000      | 0.0000    |
| 7854.7987              | 6085.2261   | 307.1620   | -1769.5726  | 6149.8368 |
| 306.1437               | -17.7104    | 90.2988    | 511540.4688 | -20.2801  |
| -20.2832               |             |            |             |           |
| [27474]ENERGY: 7040000 | 3232.0908   | 5299.2601  | 5494.3946   |           |
| 309.4213               | -14303.1653 | -1799.6080 | 0.0000      | 0.0000    |
| 7856.9845              | 6089.3779   | 307.2475   | -1767.6066  | 6150.6835 |
| 306.1404               | -48.1418    | -195.6481  | 511540.4688 | -20.1577  |
| -20.1622               |             |            |             |           |
| [27510]ENERGY: 7050000 | 3227.4942   | 5350.4269  | 5462.7089   |           |
| 317.6665               | -14335.7889 | -1751.6526 | 0.0000      | 0.0000    |
| 7818.3026              | 6089.1575   | 305.7348   | -1729.1450  | 6151.0775 |
| 306.2781               | -47.4590    | -32.6737   | 511540.4688 | -19.2213  |
| -19.1973               |             |            |             |           |
| [27560]ENERGY: 7060000 | 3234.8520   | 5239.8390  | 5465.1240   |           |
| 312.9149               | -14255.8532 | -1703.6891 | 0.0000      | 0.0000    |
| 7795.8283              | 6089.0159   | 304.8560   | -1706.8123  | 6149.6305 |
| 306.2365               | -178.6012   | -176.9011  | 511540.4688 | -20.4860  |
| -20.4920               |             |            |             |           |
| [27596]ENERGY: 7070000 | 3284.2586   | 5383.8215  | 5405.9966   |           |
| 325.1619               | -14407.1577 | -1700.1552 | 0.0000      | 0.0000    |
| 7795.5264              | 6087.4520   | 304.8442   | -1708.0744  | 6151.4565 |
| 306.4311               | 112.4937    | 132.8794   | 511540.4688 | -19.3170  |
| -19.3392               |             |            |             |           |
| [27646]ENERGY: 7080000 | 3191.2127   | 5267.2511  | 5455.5648   |           |
| 299.4646               | -14285.3780 | -1708.5767 | 0.0000      | 0.0000    |
| 7866.2477              | 6085.7863   | 307.6097   | -1780.4614  | 6150.7913 |
| 306.2552               | 93.8975     | 73.0149    | 511540.4688 | -22.3968  |
| -22.3756               |             |            |             |           |
| [27682]ENERGY: 7090000 | 3209.0917   | 5356.9742  | 5444.1479   |           |
| 328.8648               | -14421.7935 | -1697.7519 | 0.0000      | 0.0000    |
| 7865.8390              | 6085.3721   | 307.5938   | -1780.4669  | 6151.3185 |
| 306.2228               | -14.8243    | 6.2993     | 511540.4688 | -18.6012  |
| -18.6060               |             |            |             |           |
| [27735]ENERGY: 7100000 | 3257.3423   | 5346.2652  | 5452.9015   |           |
| 338.4029               | -14449.1991 | -1710.9056 | 0.0000      | 0.0000    |

## Supplementary Text 6

|                        |             |            |             |           |
|------------------------|-------------|------------|-------------|-----------|
| 7857.3942              | 6092.2013   | 307.2635   | -1765.1929  | 6153.1146 |
| 306.3131               | -186.5349   | -109.8056  | 511540.4688 | -22.0531  |
| -22.0418               |             |            |             |           |
| [27771]ENERGY: 7110000 | 3235.6585   | 5274.3178  | 5415.9288   |           |
| 317.9050               | -14261.2188 | -1753.0565 | 0.0000      | 0.0000    |
| 7863.4832              | 6093.0179   | 307.5016   | -1770.4653  | 6153.7457 |
| 306.3984               | 18.1318     | -65.9688   | 511540.4688 | -22.8009  |
| -22.8429               |             |            |             |           |
| [27821]ENERGY: 7120000 | 3297.9311   | 5330.8633  | 5521.6547   |           |
| 331.5674               | -14344.4732 | -1767.5908 | 0.0000      | 0.0000    |
| 7726.6288              | 6096.5813   | 302.1499   | -1630.0476  | 6154.0839 |
| 306.3730               | -202.8476   | -221.5940  | 511540.4688 | -23.6352  |
| -23.5908               |             |            |             |           |
| [27857]ENERGY: 7130000 | 3170.4429   | 5287.6689  | 5447.5449   |           |
| 345.6160               | -14292.6742 | -1678.6412 | 0.0000      | 0.0000    |
| 7808.9173              | 6088.8746   | 305.3678   | -1720.0426  | 6154.9551 |
| 306.4033               | 324.1351    | 99.4815    | 511540.4688 | -21.6416  |
| -21.6733               |             |            |             |           |
| [27907]ENERGY: 7140000 | 3253.8624   | 5372.0842  | 5480.4714   |           |
| 326.4974               | -14412.3638 | -1668.8759 | 0.0000      | 0.0000    |
| 7739.1530              | 6090.8286   | 302.6397   | -1648.3244  | 6154.7240 |
| 306.3626               | 113.9092    | 46.8052    | 511540.4688 | -19.6499  |
| -19.6490               |             |            |             |           |
| [27943]ENERGY: 7150000 | 3250.4071   | 5319.4510  | 5461.6738   |           |
| 301.3908               | -14392.7098 | -1683.2564 | 0.0000      | 0.0000    |
| 7835.3866              | 6092.3430   | 306.4029   | -1743.0435  | 6154.4690 |
| 306.4440               | 76.7437     | 27.2450    | 511540.4688 | -21.4124  |
| -21.3807               |             |            |             |           |
| [27993]ENERGY: 7160000 | 3295.0356   | 5236.8477  | 5439.3507   |           |
| 316.3701               | -14351.9089 | -1699.1624 | 0.0000      | 0.0000    |
| 7858.5006              | 6095.0333   | 307.3068   | -1763.4673  | 6154.9136 |
| 306.5021               | 135.4935    | 83.5128    | 511540.4688 | -18.1475  |
| -18.1824               |             |            |             |           |
| [28029]ENERGY: 7170000 | 3305.1199   | 5360.4498  | 5473.3292   |           |
| 336.8142               | -14425.8867 | -1707.2714 | 0.0000      | 0.0000    |
| 7751.7683              | 6094.3232   | 303.1330   | -1657.4451  | 6156.8696 |
| 306.4768               | -107.1695   | -66.0348   | 511540.4688 | -22.8312  |
| -22.8116               |             |            |             |           |
| [28079]ENERGY: 7180000 | 3278.9416   | 5384.6881  | 5465.7663   |           |
| 328.0260               | -14429.0084 | -1672.8621 | 0.0000      | 0.0000    |
| 7740.0295              | 6095.5809   | 302.6740   | -1644.4486  | 6156.8028 |
| 306.5866               | 193.4463    | 65.2327    | 511540.4688 | -21.6436  |
| -21.6525               |             |            |             |           |
| [28115]ENERGY: 7190000 | 3229.7626   | 5428.1669  | 5450.6004   |           |
| 307.9016               | -14372.4973 | -1722.2445 | 0.0000      | 0.0000    |
| 7772.1465              | 6093.8362   | 303.9299   | -1678.3103  | 6157.1409 |
| 306.4552               | -105.0755   | -22.2759   | 511540.4688 | -20.5570  |
| -20.5582               |             |            |             |           |
| [28168]ENERGY: 7200000 | 3248.7124   | 5404.0530  | 5447.8351   |           |
| 329.7101               | -14359.9628 | -1740.4165 | 0.0000      | 0.0000    |
| 7763.9775              | 6093.9087   | 303.6105   | -1670.0688  | 6156.8556 |
| 306.5228               | -32.5343    | -109.8388  | 511540.4688 | -15.8606  |
| -15.8592               |             |            |             |           |
| [28204]ENERGY: 7210000 | 3243.9024   | 5362.8753  | 5464.9692   |           |

Supplementary Text 6

|                        |             |            |             |           |
|------------------------|-------------|------------|-------------|-----------|
| 329.0378               | -14510.3109 | -1681.2700 | 0.0000      | 0.0000    |
| 7883.7115              | 6092.9153   | 308.2927   | -1790.7963  | 6157.5655 |
| 306.6363               | 19.1295     | -25.2705   | 511540.4688 | -20.2234  |
| -20.2235               |             |            |             |           |
| [28254]ENERGY: 7220000 | 3298.2408   | 5319.6608  | 5424.2974   |           |
| 298.6691               | -14404.0544 | -1690.4798 | 0.0000      | 0.0000    |
| 7849.3858              | 6095.7198   | 306.9504   | -1753.6660  | 6158.1583 |
| 306.6351               | -110.1912   | -153.7661  | 511540.4688 | -18.6325  |
| -18.6233               |             |            |             |           |
| [28290]ENERGY: 7230000 | 3275.5703   | 5396.5799  | 5452.8988   |           |
| 330.6359               | -14433.4325 | -1727.0655 | 0.0000      | 0.0000    |
| 7800.8921              | 6096.0790   | 305.0540   | -1704.8131  | 6157.8955 |
| 306.6491               | 146.9209    | 86.4946    | 511540.4688 | -18.3569  |
| -18.3544               |             |            |             |           |
| [28340]ENERGY: 7240000 | 3257.6153   | 5279.6086  | 5462.8639   |           |
| 352.9048               | -14319.3597 | -1706.2193 | 0.0000      | 0.0000    |
| 7767.0945              | 6094.5081   | 303.7324   | -1672.5864  | 6157.8989 |
| 306.6988               | -192.6056   | -97.2239   | 511540.4688 | -19.3579  |
| -19.3821               |             |            |             |           |
| [28376]ENERGY: 7250000 | 3259.6141   | 5287.6982  | 5499.8616   |           |
| 316.0296               | -14356.0666 | -1807.4084 | 0.0000      | 0.0000    |
| 7897.2760              | 6097.0045   | 308.8231   | -1800.2715  | 6158.3864 |
| 306.5680               | -164.7917   | -234.2221  | 511540.4688 | -18.3590  |
| -18.3238               |             |            |             |           |
| [28426]ENERGY: 7260000 | 3254.1415   | 5335.1427  | 5439.3168   |           |
| 302.9298               | -14270.1685 | -1717.0939 | 0.0000      | 0.0000    |
| 7751.5308              | 6095.7992   | 303.1237   | -1655.7317  | 6158.2571 |
| 306.5391               | 4.1358      | -64.4070   | 511540.4688 | -15.1369  |
| -15.1600               |             |            |             |           |
| [28462]ENERGY: 7270000 | 3273.4661   | 5389.1862  | 5468.6974   |           |
| 329.8231               | -14382.3116 | -1743.1148 | 0.0000      | 0.0000    |
| 7761.8268              | 6097.5732   | 303.5264   | -1664.2536  | 6158.9960 |
| 306.5551               | -166.2368   | -94.0494   | 511540.4688 | -21.3364  |
| -21.3141               |             |            |             |           |
| [28512]ENERGY: 7280000 | 3234.9030   | 5283.6864  | 5397.4628   |           |
| 350.8723               | -14337.5915 | -1752.8995 | 0.0000      | 0.0000    |
| 7919.3201              | 6095.7536   | 309.6851   | -1823.5665  | 6158.9193 |
| 306.6253               | 9.5755      | -5.5537    | 511540.4688 | -14.0419  |
| -14.0397               |             |            |             |           |
| [28548]ENERGY: 7290000 | 3213.0341   | 5288.2521  | 5484.4842   |           |
| 331.6264               | -14349.8127 | -1691.7174 | 0.0000      | 0.0000    |
| 7818.9978              | 6094.8645   | 305.7620   | -1724.1332  | 6158.3037 |
| 306.6073               | -1.9895     | 84.5727    | 511540.4688 | -22.4728  |
| -22.4792               |             |            |             |           |
| [28601]ENERGY: 7300000 | 3278.7919   | 5348.9561  | 5479.7831   |           |
| 321.4257               | -14385.8602 | -1749.0727 | 0.0000      | 0.0000    |
| 7801.6621              | 6095.6859   | 305.0841   | -1705.9762  | 6160.2845 |
| 306.4910               | -18.5748    | -86.0167   | 511540.4688 | -17.1326  |
| -17.1435               |             |            |             |           |
| [28637]ENERGY: 7310000 | 3266.1469   | 5329.3026  | 5450.4714   |           |
| 304.6068               | -14385.7164 | -1752.9855 | 0.0000      | 0.0000    |
| 7882.1719              | 6093.9977   | 308.2325   | -1788.1742  | 6158.5982 |
| 306.4713               | -124.5207   | -252.9975  | 511540.4688 | -15.9254  |
| -15.9342               |             |            |             |           |

## Supplementary Text 6

|                        |             |            |             |           |
|------------------------|-------------|------------|-------------|-----------|
| [28687]ENERGY: 7320000 | 3200.6986   | 5296.8389  | 5436.7396   |           |
| 330.5696               | -14265.5200 | -1753.6747 | 0.0000      | 0.0000    |
| 7850.5827              | 6096.2347   | 306.9972   | -1754.3480  | 6159.2711 |
| 306.4794               | 41.5092     | -40.7390   | 511540.4688 | -18.3787  |
| -18.3746               |             |            |             |           |
| [28723]ENERGY: 7330000 | 3249.9244   | 5279.8691  | 5461.8071   |           |
| 333.4784               | -14305.8846 | -1792.6933 | 0.0000      | 0.0000    |
| 7866.8235              | 6093.3247   | 307.6323   | -1773.4988  | 6159.0177 |
| 306.5674               | -50.4239    | -139.8364  | 511540.4688 | -20.1892  |
| -20.1720               |             |            |             |           |
| [28773]ENERGY: 7340000 | 3249.0592   | 5313.0177  | 5461.7350   |           |
| 316.1551               | -14321.2761 | -1770.1146 | 0.0000      | 0.0000    |
| 7846.7363              | 6095.3126   | 306.8467   | -1751.4238  | 6160.2507 |
| 306.6903               | -217.7438   | -235.8946  | 511540.4688 | -19.7361  |
| -19.7382               |             |            |             |           |
| [28809]ENERGY: 7350000 | 3301.5557   | 5360.8053  | 5441.6003   |           |
| 316.0969               | -14445.2327 | -1685.1813 | 0.0000      | 0.0000    |
| 7808.9073              | 6098.5515   | 305.3674   | -1710.3557  | 6160.0798 |
| 306.7816               | -198.7150   | -179.0313  | 511540.4688 | -21.0576  |
| -21.0655               |             |            |             |           |
| [28859]ENERGY: 7360000 | 3272.8512   | 5291.2044  | 5461.2741   |           |
| 323.7865               | -14330.2725 | -1745.8838 | 0.0000      | 0.0000    |
| 7823.8786              | 6096.8385   | 305.9529   | -1727.0402  | 6161.6725 |
| 306.7390               | 3.4688      | -89.1507   | 511540.4688 | -16.2569  |
| -16.2690               |             |            |             |           |
| [28895]ENERGY: 7370000 | 3199.1896   | 5441.0213  | 5441.9777   |           |
| 329.0768               | -14334.7934 | -1742.5627 | 0.0000      | 0.0000    |
| 7764.6947              | 6098.6040   | 303.6385   | -1666.0906  | 6160.9143 |
| 306.5972               | 36.6040     | -50.4432   | 511540.4688 | -18.5832  |
| -18.5698               |             |            |             |           |
| [28945]ENERGY: 7380000 | 3226.9293   | 5270.2982  | 5448.7503   |           |
| 336.8499               | -14368.7713 | -1628.1254 | 0.0000      | 0.0000    |
| 7814.1110              | 6100.0420   | 305.5709   | -1714.0690  | 6160.6048 |
| 306.6424               | 66.6982     | -1.1140    | 511540.4688 | -21.2126  |
| -21.2246               |             |            |             |           |
| [28981]ENERGY: 7390000 | 3204.4925   | 5340.5662  | 5403.0075   |           |
| 336.0991               | -14258.7034 | -1719.0118 | 0.0000      | 0.0000    |
| 7793.5574              | 6100.0075   | 304.7672   | -1693.5499  | 6161.7458 |
| 306.7768               | 47.4441     | 78.0344    | 511540.4688 | -20.9491  |
| -20.9324               |             |            |             |           |
| [29034]ENERGY: 7400000 | 3267.4488   | 5313.8920  | 5458.4424   |           |
| 312.4856               | -14337.5715 | -1737.0706 | 0.0000      | 0.0000    |
| 7821.1240              | 6098.7507   | 305.8452   | -1722.3733  | 6162.3868 |
| 306.7104               | 34.5648     | 74.9293    | 511540.4688 | -18.4142  |
| -18.4180               |             |            |             |           |
| [29070]ENERGY: 7410000 | 3210.5478   | 5309.8929  | 5458.1203   |           |
| 354.9973               | -14315.3836 | -1709.3331 | 0.0000      | 0.0000    |
| 7790.7152              | 6099.5567   | 304.6560   | -1691.1585  | 6162.8779 |
| 306.6123               | 107.5938    | -0.4676    | 511540.4688 | -20.2705  |
| -20.2669               |             |            |             |           |
| [29120]ENERGY: 7420000 | 3168.3317   | 5277.7291  | 5440.2692   |           |
| 338.5658               | -14293.7071 | -1690.8201 | 0.0000      | 0.0000    |
| 7861.5191              | 6101.8876   | 307.4248   | -1759.6315  | 6163.7922 |
| 306.7388               | 70.9619     | 89.3761    | 511540.4688 | -20.7701  |

Supplementary Text 6

-20.7592  
 [29156]ENERGY: 7430000      3255.0119      5440.1449      5421.6076  
 334.2936      -14418.6774      -1691.6303      0.0000      0.0000  
 7760.0184      6100.7687      303.4556      -1659.2497      6163.7905  
 306.8748      -6.5854      100.5288      511540.4688      -14.3543  
 -14.3725  
 [29206]ENERGY: 7440000      3214.5516      5374.0916      5425.6067  
 312.8692      -14309.4114      -1652.5868      0.0000      0.0000  
 7739.0948      6104.2158      302.6374      -1634.8791      6164.1014  
 306.8772      191.1753      229.1303      511540.4688      -15.5086  
 -15.5130  
 [29242]ENERGY: 7450000      3221.7235      5289.8830      5431.9518  
 301.6566      -14360.6016      -1724.3739      0.0000      0.0000  
 7940.9273      6101.1667      310.5301      -1839.7606      6163.1550  
 306.8406      353.7863      241.1786      511540.4688      -17.0888  
 -17.0813  
 [29292]ENERGY: 7460000      3292.1802      5242.2741      5428.4342  
 338.6754      -14326.0099      -1666.4260      0.0000      0.0000  
 7795.1579      6104.2861      304.8298      -1690.8719      6164.2675  
 306.9965      286.4037      262.2341      511540.4688      -15.7745  
 -15.7865  
 [29328]ENERGY: 7470000      3251.9678      5349.3702      5440.4626  
 313.7095      -14307.3010      -1737.8043      0.0000      0.0000  
 7792.5099      6102.9147      304.7262      -1689.5953      6165.1387  
 307.0611      -132.5294      -125.8306      511540.4688      -14.9410  
 -14.9381  
 [29378]ENERGY: 7480000      3300.3949      5203.9052      5450.7284  
 334.3998      -14368.6248      -1679.2558      0.0000      0.0000  
 7858.3070      6099.8546      307.2992      -1758.4524      6164.0058  
 306.8670      97.8919      3.1668      511540.4688      -12.3844  
 -12.3729  
 [29414]ENERGY: 7490000      3255.7537      5333.3545      5389.1166  
 311.2124      -14364.3702      -1749.9174      0.0000      0.0000  
 7925.9451      6101.0947      309.9442      -1824.8504      6163.6924  
 307.0848      -110.6514      -55.0326      511540.4688      -16.6437  
 -16.6373  
 [29467]ENERGY: 7500000      3207.6547      5280.9190      5447.1469  
 326.1978      -14407.0166      -1678.6225      0.0000      0.0000  
 7922.0283      6098.3075      309.7910      -1823.7208      6164.3058  
 307.0633      -132.2045      -186.2191      511540.4688      -15.0091  
 -15.0156  
 [29503]ENERGY: 7510000      3267.6517      5290.4799      5478.7629  
 318.3524      -14339.3821      -1711.2735      0.0000      0.0000  
 7797.1566      6101.7479      304.9079      -1695.4086      6165.0943  
 306.8245      37.2398      -31.5491      511540.4688      -18.5426  
 -18.5516  
 [29553]ENERGY: 7520000      3261.9358      5381.3923      5429.9387  
 311.5462      -14331.1463      -1762.5703      0.0000      0.0000  
 7812.0580      6103.1544      305.4906      -1708.9036      6165.2801  
 307.0627      -73.2819      -134.7175      511540.4688      -13.5445  
 -13.5475  
 [29589]ENERGY: 7530000      3277.4069      5297.1683      5476.1611  
 327.0263      -14354.9821      -1782.0133      0.0000      0.0000  
 7857.3417      6098.1090      307.2615      -1759.2327      6164.9782

## Supplementary Text 6

|                        |             |            |             |           |
|------------------------|-------------|------------|-------------|-----------|
| 307.0049               | 65.0481     | 97.2657    | 511540.4688 | -16.1341  |
| -16.0973               |             |            |             |           |
| [29639]ENERGY: 7540000 | 3192.2711   | 5365.1352  | 5467.4888   |           |
| 310.7872               | -14274.1027 | -1736.8897 | 0.0000      | 0.0000    |
| 7777.2854              | 6101.9753   | 304.1309   | -1675.3101  | 6165.6558 |
| 307.0008               | 58.4241     | 13.8908    | 511540.4688 | -17.4737  |
| -17.4911               |             |            |             |           |
| [29675]ENERGY: 7550000 | 3253.5460   | 5300.1382  | 5479.8710   |           |
| 335.0897               | -14387.1667 | -1717.2267 | 0.0000      | 0.0000    |
| 7840.5365              | 6104.7881   | 306.6043   | -1735.7484  | 6165.9360 |
| 307.0183               | 12.4386     | -58.3736   | 511540.4688 | -13.0107  |
| -13.0166               |             |            |             |           |
| [29725]ENERGY: 7560000 | 3204.8897   | 5337.5590  | 5445.0688   |           |
| 329.6273               | -14392.1471 | -1744.3446 | 0.0000      | 0.0000    |
| 7921.4478              | 6102.1009   | 309.7683   | -1819.3469  | 6167.0255 |
| 307.1335               | 175.0602    | 92.6203    | 511540.4688 | -18.5565  |
| -18.5647               |             |            |             |           |
| [29761]ENERGY: 7570000 | 3302.3987   | 5430.4342  | 5408.9956   |           |
| 308.6708               | -14470.2150 | -1733.2668 | 0.0000      | 0.0000    |
| 7854.5141              | 6101.5315   | 307.1509   | -1752.9826  | 6165.9849 |
| 307.0205               | -42.8941    | -57.9161   | 511540.4688 | -15.1071  |
| -15.1050               |             |            |             |           |
| [29811]ENERGY: 7580000 | 3201.9505   | 5309.1622  | 5406.9819   |           |
| 341.3315               | -14411.7022 | -1648.1248 | 0.0000      | 0.0000    |
| 7901.1671              | 6100.7663   | 308.9753   | -1800.4008  | 6166.0134 |
| 307.0412               | 72.6109     | -20.4907   | 511540.4688 | -12.4112  |
| -12.4016               |             |            |             |           |
| [29847]ENERGY: 7590000 | 3178.0004   | 5437.4993  | 5394.7967   |           |
| 312.4578               | -14381.3686 | -1671.0508 | 0.0000      | 0.0000    |
| 7835.2532              | 6105.5881   | 306.3977   | -1729.6651  | 6165.6733 |
| 306.9017               | 210.2417    | 68.6203    | 511540.4688 | -17.2038  |
| -17.2334               |             |            |             |           |
| [29900]ENERGY: 7600000 | 3249.7943   | 5384.5876  | 5442.7601   |           |
| 306.4769               | -14399.4079 | -1739.9284 | 0.0000      | 0.0000    |
| 7858.0031              | 6102.2857   | 307.2873   | -1755.7174  | 6166.4778 |
| 307.0200               | -70.3985    | -85.0361   | 511540.4688 | -17.7235  |
| -17.7206               |             |            |             |           |
| [29936]ENERGY: 7610000 | 3232.0893   | 5355.2083  | 5450.1310   |           |
| 314.2383               | -14381.5359 | -1752.6379 | 0.0000      | 0.0000    |
| 7884.2594              | 6101.7524   | 308.3141   | -1782.5070  | 6165.8233 |
| 307.0270               | -89.6037    | -92.0690   | 511540.4688 | -16.3269  |
| -16.3092               |             |            |             |           |
| [29986]ENERGY: 7620000 | 3231.0980   | 5348.5660  | 5409.4645   |           |
| 296.7373               | -14409.9411 | -1695.7971 | 0.0000      | 0.0000    |
| 7920.5265              | 6100.6541   | 309.7323   | -1819.8724  | 6165.2118 |
| 306.8823               | 150.0779    | 92.6990    | 511540.4688 | -17.3586  |
| -17.3582               |             |            |             |           |
| [30022]ENERGY: 7630000 | 3221.7403   | 5401.6490  | 5425.4114   |           |
| 305.3163               | -14288.5420 | -1786.1564 | 0.0000      | 0.0000    |
| 7823.0000              | 6102.4186   | 305.9185   | -1720.5814  | 6166.5004 |
| 306.7499               | -178.9871   | -109.1174  | 511540.4688 | -19.1983  |
| -19.1852               |             |            |             |           |
| [30072]ENERGY: 7640000 | 3220.4128   | 5357.2443  | 5413.8299   |           |
| 330.8306               | -14364.5198 | -1688.0192 | 0.0000      | 0.0000    |

## Supplementary Text 6

|                        |             |            |             |           |
|------------------------|-------------|------------|-------------|-----------|
| 7830.3874              | 6100.1661   | 306.2074   | -1730.2213  | 6165.3679 |
| 306.7333               | 161.6860    | 113.1110   | 511540.4688 | -14.6415  |
| -14.6450               |             |            |             |           |
| [30108]ENERGY: 7650000 | 3304.4694   | 5293.7204  | 5429.7557   |           |
| 338.2588               | -14460.2020 | -1696.7785 | 0.0000      | 0.0000    |
| 7889.9171              | 6099.1410   | 308.5353   | -1790.7761  | 6165.2821 |
| 306.6504               | 5.3855      | 28.6553    | 511540.4688 | -13.2958  |
| -13.3187               |             |            |             |           |
| [30158]ENERGY: 7660000 | 3268.6364   | 5397.1000  | 5454.8206   |           |
| 329.7659               | -14341.0842 | -1778.6924 | 0.0000      | 0.0000    |
| 7771.1806              | 6101.7269   | 303.8921   | -1669.4537  | 6166.2247 |
| 306.8485               | 48.0172     | -16.1288   | 511540.4688 | -15.4038  |
| -15.4128               |             |            |             |           |
| [30194]ENERGY: 7670000 | 3244.8619   | 5358.0440  | 5437.1364   |           |
| 302.3586               | -14319.4087 | -1722.6721 | 0.0000      | 0.0000    |
| 7800.6489              | 6100.9689   | 305.0445   | -1699.6800  | 6164.0204 |
| 306.8951               | 155.3558    | 94.7264    | 511540.4688 | -8.9061   |
| -8.8927                |             |            |             |           |
| [30244]ENERGY: 7680000 | 3240.4654   | 5317.1769  | 5419.2741   |           |
| 313.6858               | -14339.9840 | -1710.5699 | 0.0000      | 0.0000    |
| 7858.1591              | 6098.2073   | 307.2934   | -1759.9518  | 6164.9587 |
| 306.8244               | 6.9956      | -63.9370   | 511540.4688 | -12.9932  |
| -12.9804               |             |            |             |           |
| [30280]ENERGY: 7690000 | 3281.2222   | 5437.5781  | 5410.5797   |           |
| 320.2317               | -14427.8478 | -1702.7207 | 0.0000      | 0.0000    |
| 7781.8230              | 6100.8662   | 304.3083   | -1680.9568  | 6165.5548 |
| 307.0490               | 33.5079     | -32.2963   | 511540.4688 | -11.5669  |
| -11.5613               |             |            |             |           |
| [30333]ENERGY: 7700000 | 3207.8662   | 5456.2281  | 5444.6801   |           |
| 325.8907               | -14425.7475 | -1681.7055 | 0.0000      | 0.0000    |
| 7775.8298              | 6103.0420   | 304.0739   | -1672.7879  | 6165.4290 |
| 307.0849               | -40.0044    | 7.6049     | 511540.4688 | -17.4892  |
| -17.5077               |             |            |             |           |
| [30369]ENERGY: 7710000 | 3218.1895   | 5331.3920  | 5394.9851   |           |
| 313.8630               | -14314.0886 | -1649.6747 | 0.0000      | 0.0000    |
| 7810.1960              | 6104.8622   | 305.4178   | -1705.3338  | 6166.4001 |
| 306.9735               | -65.2075    | -111.5094  | 511540.4688 | -12.8413  |
| -12.8483               |             |            |             |           |
| [30419]ENERGY: 7720000 | 3199.3223   | 5373.6891  | 5425.2685   |           |
| 327.2047               | -14397.4146 | -1706.5945 | 0.0000      | 0.0000    |
| 7878.7449              | 6100.2205   | 308.0984   | -1778.5245  | 6166.3346 |
| 306.8946               | -24.6482    | -53.9764   | 511540.4688 | -16.3195  |
| -16.2826               |             |            |             |           |
| [30455]ENERGY: 7730000 | 3332.8525   | 5270.5381  | 5471.8526   |           |
| 329.7152               | -14429.3934 | -1668.9985 | 0.0000      | 0.0000    |
| 7799.2240              | 6105.7907   | 304.9888   | -1693.4334  | 6166.9172 |
| 306.9319               | -85.8915    | -53.2764   | 511540.4688 | -16.2472  |
| -16.2577               |             |            |             |           |
| [30505]ENERGY: 7740000 | 3339.7393   | 5229.3583  | 5453.3546   |           |
| 312.0808               | -14344.6901 | -1716.6832 | 0.0000      | 0.0000    |
| 7827.6135              | 6100.7732   | 306.0989   | -1726.8403  | 6166.1095 |
| 306.8130               | -75.7901    | -6.4683    | 511540.4688 | -17.0674  |
| -17.0676               |             |            |             |           |
| [30541]ENERGY: 7750000 | 3337.8445   | 5208.3972  | 5494.7987   |           |



## Supplementary Text 6

|                        |             |            |             |           |
|------------------------|-------------|------------|-------------|-----------|
| 334.3446               | -14326.3387 | -1696.3876 | 0.0000      | 0.0000    |
| 7752.2493              | 6104.9080   | 303.1518   | -1647.3413  | 6167.2029 |
| 306.6161               | -20.6313    | 26.7978    | 511540.4688 | -10.8731  |
| -10.8845               |             |            |             |           |
| [30591]ENERGY: 7760000 | 3218.6154   | 5271.6017  | 5479.2510   |           |
| 329.2026               | -14270.9661 | -1756.4571 | 0.0000      | 0.0000    |
| 7831.3862              | 6102.6336   | 306.2465   | -1728.7525  | 6167.7266 |
| 306.8102               | 36.5773     | -5.3250    | 511540.4688 | -14.5772  |
| -14.5906               |             |            |             |           |
| [30627]ENERGY: 7770000 | 3238.8235   | 5260.6392  | 5382.7106   |           |
| 317.8355               | -14238.7595 | -1733.2688 | 0.0000      | 0.0000    |
| 7877.9056              | 6105.8862   | 308.0656   | -1772.0194  | 6168.9127 |
| 306.9565               | 5.5515      | -74.3828   | 511540.4688 | -16.8268  |
| -16.8385               |             |            |             |           |
| [30677]ENERGY: 7780000 | 3219.3545   | 5298.1123  | 5417.6124   |           |
| 329.6708               | -14313.2846 | -1760.5588 | 0.0000      | 0.0000    |
| 7913.1955              | 6104.1022   | 309.4456   | -1809.0933  | 6168.4006 |
| 306.9996               | -94.8862    | -60.2658   | 511540.4688 | -16.9787  |
| -16.9446               |             |            |             |           |
| [30713]ENERGY: 7790000 | 3255.1009   | 5267.6383  | 5426.4549   |           |
| 317.7065               | -14376.3060 | -1655.9420 | 0.0000      | 0.0000    |
| 7873.6366              | 6108.2892   | 307.8987   | -1765.3474  | 6168.3728 |
| 306.9809               | 75.1334     | 58.1997    | 511540.4688 | -15.0381  |
| -15.0434               |             |            |             |           |
| [30766]ENERGY: 7800000 | 3216.4661   | 5378.3079  | 5390.7466   |           |
| 336.4480               | -14348.8213 | -1703.7560 | 0.0000      | 0.0000    |
| 7835.8427              | 6105.2340   | 306.4207   | -1730.6087  | 6168.2058 |
| 306.9414               | 33.6613     | 17.2859    | 511540.4688 | -13.0423  |
| -13.0630               |             |            |             |           |
| [30802]ENERGY: 7810000 | 3277.1531   | 5397.4367  | 5448.2399   |           |
| 349.8272               | -14412.7592 | -1684.0470 | 0.0000      | 0.0000    |
| 7733.4069              | 6109.2577   | 302.4150   | -1624.1492  | 6168.7212 |
| 306.9475               | 23.0356     | -90.2639   | 511540.4688 | -13.1103  |
| -13.0933               |             |            |             |           |
| [30852]ENERGY: 7820000 | 3244.6622   | 5247.2285  | 5445.8341   |           |
| 339.8074               | -14386.2203 | -1685.6423 | 0.0000      | 0.0000    |
| 7899.4561              | 6105.1256   | 308.9084   | -1794.3305  | 6167.5178 |
| 306.7607               | 105.7680    | -30.5278   | 511540.4688 | -16.6978  |
| -16.7068               |             |            |             |           |
| [30888]ENERGY: 7830000 | 3257.9289   | 5218.0359  | 5492.1478   |           |
| 327.7436               | -14429.3679 | -1645.6897 | 0.0000      | 0.0000    |
| 7881.3487              | 6102.1473   | 308.2003   | -1779.2014  | 6167.7046 |
| 306.9035               | -74.1170    | -122.3279  | 511540.4688 | -14.6275  |
| -14.6189               |             |            |             |           |
| [30938]ENERGY: 7840000 | 3220.1574   | 5292.3996  | 5449.3258   |           |
| 322.7898               | -14310.1192 | -1749.7109 | 0.0000      | 0.0000    |
| 7880.6579              | 6105.5004   | 308.1732   | -1775.1575  | 6167.6488 |
| 306.8900               | -60.6239    | -76.9193   | 511540.4688 | -13.1341  |
| -13.1590               |             |            |             |           |
| [30974]ENERGY: 7850000 | 3245.2241   | 5352.1407  | 5425.0445   |           |
| 319.2587               | -14251.7039 | -1755.7248 | 0.0000      | 0.0000    |
| 7770.9012              | 6105.1407   | 303.8812   | -1665.7606  | 6167.5902 |
| 306.8323               | 146.6337    | 34.6281    | 511540.4688 | -13.5845  |
| -13.5456               |             |            |             |           |

## Supplementary Text 6

|                        |             |            |             |           |
|------------------------|-------------|------------|-------------|-----------|
| [31024]ENERGY: 7860000 | 3286.5774   | 5331.2347  | 5427.4485   |           |
| 335.5441               | -14350.5143 | -1721.4795 | 0.0000      | 0.0000    |
| 7798.9501              | 6107.7610   | 304.9781   | -1691.1891  | 6167.7514 |
| 306.7728               | 121.5101    | 118.0907   | 511540.4688 | -16.8753  |
| -16.8891               |             |            |             |           |
| [31060]ENERGY: 7870000 | 3249.4026   | 5329.1113  | 5473.9101   |           |
| 314.7848               | -14339.7363 | -1702.5986 | 0.0000      | 0.0000    |
| 7779.4555              | 6104.3294   | 304.2157   | -1675.1261  | 6167.6285 |
| 306.7944               | -34.2333    | -96.8533   | 511540.4688 | -10.6055  |
| -10.6122               |             |            |             |           |
| [31110]ENERGY: 7880000 | 3343.3546   | 5287.7234  | 5499.6782   |           |
| 312.4816               | -14395.2628 | -1735.5355 | 0.0000      | 0.0000    |
| 7788.4993              | 6100.9388   | 304.5694   | -1687.5605  | 6167.2172 |
| 306.9194               | -153.4439   | -138.0646  | 511540.4688 | -13.7782  |
| -13.7576               |             |            |             |           |
| [31146]ENERGY: 7890000 | 3251.0109   | 5423.1752  | 5465.3023   |           |
| 332.5665               | -14469.3553 | -1689.5657 | 0.0000      | 0.0000    |
| 7790.6446              | 6103.7784   | 304.6533   | -1686.8661  | 6166.8008 |
| 306.7410               | 54.7748     | -25.5137   | 511540.4688 | -15.7550  |
| -15.7811               |             |            |             |           |
| [31199]ENERGY: 7900000 | 3306.0797   | 5273.8251  | 5460.3661   |           |
| 330.4258               | -14354.3898 | -1766.1121 | 0.0000      | 0.0000    |
| 7854.0942              | 6104.2889   | 307.1345   | -1749.8053  | 6167.9787 |
| 306.6951               | -318.2013   | -207.0396  | 511540.4688 | -12.9885  |
| -12.9978               |             |            |             |           |
| [31235]ENERGY: 7910000 | 3244.0574   | 5392.3938  | 5491.6447   |           |
| 336.1444               | -14471.2837 | -1658.4505 | 0.0000      | 0.0000    |
| 7767.3572              | 6101.8632   | 303.7426   | -1665.4940  | 6167.2420 |
| 306.8525               | 10.5025     | 24.6958    | 511540.4688 | -13.1464  |
| -13.1136               |             |            |             |           |
| [31285]ENERGY: 7920000 | 3225.5977   | 5277.8364  | 5473.3136   |           |
| 317.9680               | -14428.3270 | -1664.3134 | 0.0000      | 0.0000    |
| 7898.0170              | 6100.0922   | 308.8521   | -1797.9247  | 6167.5301 |
| 306.9576               | 112.9254    | 110.3757   | 511540.4688 | -14.0759  |
| -14.0971               |             |            |             |           |
| [31321]ENERGY: 7930000 | 3210.9440   | 5352.4117  | 5465.2586   |           |
| 295.5002               | -14371.4447 | -1705.4234 | 0.0000      | 0.0000    |
| 7858.4135              | 6105.6601   | 307.3034   | -1752.7534  | 6168.7399 |
| 306.9699               | -21.5759    | -78.4458   | 511540.4688 | -13.0729  |
| -13.0561               |             |            |             |           |
| [31371]ENERGY: 7940000 | 3182.5320   | 5314.2541  | 5461.2859   |           |
| 335.6358               | -14359.0219 | -1660.0829 | 0.0000      | 0.0000    |
| 7829.6455              | 6104.2485   | 306.1784   | -1725.3970  | 6167.3171 |
| 306.8690               | 211.0090    | 207.3353   | 511540.4688 | -13.8796  |
| -13.8772               |             |            |             |           |
| [31407]ENERGY: 7950000 | 3253.3786   | 5412.8567  | 5402.7716   |           |
| 334.9956               | -14338.4455 | -1722.4722 | 0.0000      | 0.0000    |
| 7767.3984              | 6110.4832   | 303.7442   | -1656.9152  | 6169.2629 |
| 306.9589               | 24.4007     | 16.2872    | 511540.4688 | -11.9863  |
| -12.0036               |             |            |             |           |
| [31457]ENERGY: 7960000 | 3299.4157   | 5363.6295  | 5441.3299   |           |
| 309.7089               | -14385.3576 | -1744.4506 | 0.0000      | 0.0000    |
| 7825.7497              | 6110.0255   | 306.0261   | -1715.7242  | 6168.9891 |
| 307.0112               | -114.4973   | -82.5815   | 511540.4688 | -17.9951  |

Supplementary Text 6

-17.9979  
 [31493]ENERGY: 7970000      3244.7437      5311.3694      5449.7340  
 330.4696      -14318.4071      -1710.9309      0.0000      0.0000  
 7802.7409      6109.7195      305.1263      -1693.0214      6169.2585  
 307.0298      43.9073      27.7999      511540.4688      -13.6946  
 -13.7076  
 [31543]ENERGY: 7980000      3245.5800      5328.3228      5400.3292  
 339.9793      -14356.0004      -1706.2053      0.0000      0.0000  
 7851.0401      6103.0458      307.0150      -1747.9942      6168.2356  
 306.9918      -111.6696      -143.5210      511540.4688      -15.8450  
 -15.8041  
 [31579]ENERGY: 7990000      3322.9504      5303.8027      5441.5405  
 346.7198      -14456.1517      -1653.5715      0.0000      0.0000  
 7803.4831      6108.7732      305.1553      -1694.7099      6170.1421  
 307.0294      -99.4718      -115.4169      511540.4688      -14.0599  
 -14.0563  
 [31632]ENERGY: 8000000      3259.8241      5298.8411      5435.8181  
 321.7700      -14366.6083      -1780.3331      0.0000      0.0000  
 7934.1199      6103.4318      310.2639      -1830.6881      6169.1284  
 307.1207      70.7388      55.3239      511540.4688      -17.1764  
 -17.1828  
 [31668]ENERGY: 8010000      3268.1198      5367.9477      5389.4475  
 312.7775      -14363.0983      -1746.4721      0.0000      0.0000  
 7871.5453      6100.2673      307.8169      -1771.2780      6169.4436  
 307.1454      -33.9384      -73.8806      511540.4688      -11.6549  
 -11.6573  
 [31718]ENERGY: 8020000      3290.9700      5355.3560      5388.6261  
 319.5903      -14438.3311      -1713.4822      0.0000      0.0000  
 7903.2626      6105.9916      309.0572      -1797.2710      6169.2936  
 307.1968      -91.7445      -25.6332      511540.4688      -18.6076  
 -18.6184  
 [31754]ENERGY: 8030000      3199.7715      5327.2132      5412.6745  
 335.1964      -14344.6097      -1707.0308      0.0000      0.0000  
 7879.5701      6102.7853      308.1307      -1776.7848      6167.3555  
 307.0006      -18.6401      -49.2611      511540.4688      -14.3987  
 -14.4222  
 [31804]ENERGY: 8040000      3299.8193      5322.9711      5400.2274  
 322.9247      -14359.7126      -1720.3237      0.0000      0.0000  
 7838.8316      6104.7378      306.5376      -1734.0938      6168.1368  
 306.9477      -159.3570      -144.4578      511540.4688      -19.8573  
 -19.8383  
 [31840]ENERGY: 8050000      3271.8350      5305.4493      5490.5751  
 329.8808      -14381.0596      -1696.8144      0.0000      0.0000  
 7783.0032      6102.8695      304.3545      -1680.1337      6167.5794  
 307.2380      -181.5235      -154.2335      511540.4688      -16.7063  
 -16.7049  
 [31890]ENERGY: 8060000      3227.0658      5231.6404      5406.3661  
 337.5229      -14356.3785      -1704.6755      0.0000      0.0000  
 7962.4389      6103.9802      311.3713      -1858.4588      6168.6362  
 307.2611      -140.9575      -14.8776      511540.4688      -17.4048  
 -17.3968  
 [31926]ENERGY: 8070000      3195.5763      5431.9310      5433.1524  
 341.7171      -14446.5450      -1646.8940      0.0000      0.0000  
 7796.5085      6105.4463      304.8826      -1691.0622      6169.1959

## Supplementary Text 6

|                        |             |            |             |           |
|------------------------|-------------|------------|-------------|-----------|
| 307.0161               | 93.5935     | 79.7572    | 511540.4688 | -19.6576  |
| -19.6736               |             |            |             |           |
| [31976]ENERGY: 8080000 | 3239.6842   | 5301.2646  | 5382.0454   |           |
| 341.5282               | -14408.2122 | -1715.9092 | 0.0000      | 0.0000    |
| 7963.3629              | 6103.7638   | 311.4074   | -1859.5991  | 6169.2736 |
| 306.8857               | 164.3412    | 70.7961    | 511540.4688 | -18.8621  |
| -18.8589               |             |            |             |           |
| [32012]ENERGY: 8090000 | 3286.9073   | 5309.1102  | 5505.2825   |           |
| 317.6905               | -14398.9078 | -1723.5996 | 0.0000      | 0.0000    |
| 7813.1896              | 6109.6728   | 305.5349   | -1703.5168  | 6171.1965 |
| 307.0535               | -176.4549   | -178.9390  | 511540.4688 | -20.6512  |
| -20.6588               |             |            |             |           |
| [32065]ENERGY: 8100000 | 3261.5522   | 5239.5599  | 5490.5570   |           |
| 330.1668               | -14375.3672 | -1718.4135 | 0.0000      | 0.0000    |
| 7880.9674              | 6109.0225   | 308.1854   | -1771.9449  | 6171.2728 |
| 307.0930               | 34.0568     | -59.5018   | 511540.4688 | -18.0449  |
| -18.0306               |             |            |             |           |
| [32101]ENERGY: 8110000 | 3229.3117   | 5363.4197  | 5442.9250   |           |
| 320.6974               | -14377.9888 | -1727.8868 | 0.0000      | 0.0000    |
| 7857.5544              | 6108.0326   | 307.2698   | -1749.5218  | 6171.0943 |
| 307.2652               | -53.7402    | -38.4688   | 511540.4688 | -19.4228  |
| -19.4245               |             |            |             |           |
| [32151]ENERGY: 8120000 | 3236.6121   | 5414.9291  | 5413.9491   |           |
| 308.8315               | -14376.8926 | -1690.3886 | 0.0000      | 0.0000    |
| 7806.6979              | 6113.7384   | 305.2810   | -1692.9595  | 6171.7233 |
| 307.0639               | -47.6429    | -104.5991  | 511540.4688 | -20.8657  |
| -20.8716               |             |            |             |           |
| [32187]ENERGY: 8130000 | 3239.6295   | 5352.5688  | 5409.4723   |           |
| 341.5078               | -14379.0541 | -1672.0881 | 0.0000      | 0.0000    |
| 7815.6943              | 6107.7304   | 305.6328   | -1707.9638  | 6172.6824 |
| 307.2773               | 87.5250     | -27.1414   | 511540.4688 | -18.2900  |
| -18.2967               |             |            |             |           |
| [32237]ENERGY: 8140000 | 3261.6413   | 5347.3980  | 5445.2695   |           |
| 344.3051               | -14352.1305 | -1734.5981 | 0.0000      | 0.0000    |
| 7800.2409              | 6112.1262   | 305.0285   | -1688.1147  | 6170.6196 |
| 307.2407               | -46.8219    | 4.4511     | 511540.4688 | -20.2757  |
| -20.2474               |             |            |             |           |
| [32273]ENERGY: 8150000 | 3287.4485   | 5301.2614  | 5415.0738   |           |
| 317.5399               | -14369.5803 | -1723.4359 | 0.0000      | 0.0000    |
| 7875.5093              | 6103.8167   | 307.9719   | -1771.6926  | 6170.9196 |
| 307.1778               | -85.9128    | -44.8518   | 511540.4688 | -20.3451  |
| -20.3488               |             |            |             |           |
| [32323]ENERGY: 8160000 | 3321.8763   | 5338.4437  | 5432.4839   |           |
| 316.5609               | -14378.6230 | -1731.1852 | 0.0000      | 0.0000    |
| 7808.4008              | 6107.9574   | 305.3476   | -1700.4434  | 6171.3081 |
| 307.1335               | 25.0555     | -3.3436    | 511540.4688 | -20.5278  |
| -20.5433               |             |            |             |           |
| [32359]ENERGY: 8170000 | 3315.5993   | 5247.6854  | 5462.4494   |           |
| 323.2064               | -14359.6398 | -1726.5941 | 0.0000      | 0.0000    |
| 7842.1510              | 6104.8576   | 306.6674   | -1737.2934  | 6172.1314 |
| 307.2614               | -42.5860    | -97.1648   | 511540.4688 | -19.0471  |
| -19.0382               |             |            |             |           |
| [32409]ENERGY: 8180000 | 3281.7677   | 5344.3389  | 5391.2935   |           |
| 325.7480               | -14277.7029 | -1754.6061 | 0.0000      | 0.0000    |

## Supplementary Text 6

|                        |             |            |             |           |
|------------------------|-------------|------------|-------------|-----------|
| 7795.4100              | 6106.2492   | 304.8396   | -1689.1608  | 6171.4829 |
| 307.2297               | -115.7306   | -111.4319  | 511540.4688 | -17.0513  |
| -17.0675               |             |            |             |           |
| [32445]ENERGY: 8190000 | 3260.4618   | 5327.9362  | 5402.0445   |           |
| 344.0407               | -14253.8199 | -1763.2975 | 0.0000      | 0.0000    |
| 7795.3920              | 6112.7578   | 304.8389   | -1682.6342  | 6171.9245 |
| 307.0722               | -122.9975   | -196.3733  | 511540.4688 | -16.5224  |
| -16.5277               |             |            |             |           |
| [32498]ENERGY: 8200000 | 3215.4144   | 5325.5433  | 5469.1297   |           |
| 340.1800               | -14372.7581 | -1693.2181 | 0.0000      | 0.0000    |
| 7824.1392              | 6108.4305   | 305.9631   | -1715.7088  | 6171.7719 |
| 306.8998               | 113.7755    | 32.7350    | 511540.4688 | -19.4689  |
| -19.4736               |             |            |             |           |
| [32534]ENERGY: 8210000 | 3148.1194   | 5324.6709  | 5462.5520   |           |
| 349.1540               | -14344.2347 | -1722.3729 | 0.0000      | 0.0000    |
| 7890.5452              | 6108.4340   | 308.5599   | -1782.1112  | 6171.9057 |
| 306.8306               | 108.3200    | 94.1076    | 511540.4688 | -13.8215  |
| -13.7873               |             |            |             |           |
| [32584]ENERGY: 8220000 | 3164.2710   | 5349.5005  | 5486.9450   |           |
| 315.8897               | -14289.3921 | -1739.8796 | 0.0000      | 0.0000    |
| 7819.8052              | 6107.1397   | 305.7936   | -1712.6655  | 6172.5506 |
| 306.8285               | -13.0139    | -96.2363   | 511540.4688 | -18.7420  |
| -18.7619               |             |            |             |           |
| [32620]ENERGY: 8230000 | 3278.8185   | 5173.3359  | 5410.5860   |           |
| 327.5183               | -14346.1146 | -1615.1786 | 0.0000      | 0.0000    |
| 7880.7837              | 6109.7491   | 308.1782   | -1771.0345  | 6171.6846 |
| 306.8829               | -46.5069    | -94.0386   | 511540.4688 | -17.7950  |
| -17.8006               |             |            |             |           |
| [32670]ENERGY: 8240000 | 3209.1101   | 5385.6041  | 5412.5506   |           |
| 304.2737               | -14357.0087 | -1752.1251 | 0.0000      | 0.0000    |
| 7906.8031              | 6109.2078   | 309.1957   | -1797.5953  | 6172.3557 |
| 306.8803               | -72.8884    | -68.0773   | 511540.4688 | -19.2953  |
| -19.2931               |             |            |             |           |
| [32706]ENERGY: 8250000 | 3249.7630   | 5406.2176  | 5434.3665   |           |
| 309.9508               | -14471.2301 | -1685.9309 | 0.0000      | 0.0000    |
| 7864.3200              | 6107.4569   | 307.5344   | -1756.8631  | 6171.4937 |
| 306.9197               | 89.2458     | 48.0964    | 511540.4688 | -13.3375  |
| -13.3184               |             |            |             |           |
| [32756]ENERGY: 8260000 | 3233.4997   | 5301.8107  | 5481.8452   |           |
| 335.7784               | -14441.1635 | -1694.0969 | 0.0000      | 0.0000    |
| 7890.1727              | 6107.8464   | 308.5453   | -1782.3263  | 6170.7807 |
| 306.7583               | 254.1355    | 195.4122   | 511540.4688 | -18.8592  |
| -18.8695               |             |            |             |           |
| [32792]ENERGY: 8270000 | 3195.3482   | 5316.8638  | 5476.0884   |           |
| 326.5723               | -14328.0314 | -1739.5644 | 0.0000      | 0.0000    |
| 7859.8001              | 6107.0769   | 307.3576   | -1752.7231  | 6171.2720 |
| 306.7176               | -144.0614   | -283.2084  | 511540.4688 | -19.2087  |
| -19.2208               |             |            |             |           |
| [32842]ENERGY: 8280000 | 3180.1290   | 5401.2649  | 5427.3114   |           |
| 339.9413               | -14390.1449 | -1695.3100 | 0.0000      | 0.0000    |
| 7846.6526              | 6109.8443   | 306.8435   | -1736.8083  | 6170.6873 |
| 307.0354               | -61.1551    | -37.6821   | 511540.4688 | -15.1858  |
| -15.1804               |             |            |             |           |
| [32878]ENERGY: 8290000 | 3348.0012   | 5300.1455  | 5456.1053   |           |

## Supplementary Text 6

|                        |             |            |             |           |
|------------------------|-------------|------------|-------------|-----------|
| 347.6134               | -14431.6049 | -1700.7359 | 0.0000      | 0.0000    |
| 7789.7146              | 6109.2391   | 304.6169   | -1680.4755  | 6170.7864 |
| 306.9941               | 126.3406    | 102.9081   | 511540.4688 | -17.8123  |
| -17.7782               |             |            |             |           |
| [32931]ENERGY: 8300000 | 3213.2697   | 5289.7798  | 5439.3571   |           |
| 331.8822               | -14348.6963 | -1710.5499 | 0.0000      | 0.0000    |
| 7894.3638              | 6109.4064   | 308.7092   | -1784.9573  | 6172.3076 |
| 306.9618               | 233.4330    | 192.5554   | 511540.4688 | -15.4586  |
| -15.4897               |             |            |             |           |
| [32967]ENERGY: 8310000 | 3188.0256   | 5261.0706  | 5454.3961   |           |
| 314.0407               | -14333.0215 | -1699.4154 | 0.0000      | 0.0000    |
| 7921.8770              | 6106.9731   | 309.7851   | -1814.9039  | 6171.6074 |
| 306.8226               | -14.2153    | -9.7064    | 511540.4688 | -16.1235  |
| -16.1328               |             |            |             |           |
| [33017]ENERGY: 8320000 | 3252.2597   | 5352.9357  | 5440.1200   |           |
| 326.5716               | -14350.2201 | -1751.4822 | 0.0000      | 0.0000    |
| 7839.1987              | 6109.3834   | 306.5520   | -1729.8153  | 6172.9018 |
| 306.9541               | 14.0703     | 69.3584    | 511540.4688 | -14.1140  |
| -14.1009               |             |            |             |           |
| [33053]ENERGY: 8330000 | 3215.1091   | 5386.3687  | 5454.0387   |           |
| 315.9651               | -14397.7928 | -1691.3494 | 0.0000      | 0.0000    |
| 7826.3011              | 6108.6405   | 306.0476   | -1717.6606  | 6171.8388 |
| 306.7427               | 14.9372     | -29.1829   | 511540.4688 | -20.5484  |
| -20.5577               |             |            |             |           |
| [33103]ENERGY: 8340000 | 3248.5904   | 5353.5936  | 5439.3177   |           |
| 302.8625               | -14323.6104 | -1732.2854 | 0.0000      | 0.0000    |
| 7818.3515              | 6106.8197   | 305.7368   | -1711.5317  | 6170.9699 |
| 307.0334               | -199.2479   | -138.1263  | 511540.4688 | -17.7003  |
| -17.6795               |             |            |             |           |
| [33139]ENERGY: 8350000 | 3257.7746   | 5338.2130  | 5508.4249   |           |
| 326.1629               | -14417.2403 | -1745.4489 | 0.0000      | 0.0000    |
| 7842.4636              | 6110.3498   | 306.6797   | -1732.1138  | 6171.6436 |
| 307.0320               | -38.2402    | -67.1137   | 511540.4688 | -17.1906  |
| -17.1997               |             |            |             |           |
| [33189]ENERGY: 8360000 | 3202.1244   | 5309.0063  | 5501.4476   |           |
| 328.5892               | -14346.3684 | -1681.1701 | 0.0000      | 0.0000    |
| 7795.1921              | 6108.8211   | 304.8311   | -1686.3710  | 6172.6555 |
| 307.0084               | -3.8426     | -50.9474   | 511540.4688 | -16.3153  |
| -16.3334               |             |            |             |           |
| [33225]ENERGY: 8370000 | 3219.1560   | 5237.9485  | 5477.1345   |           |
| 325.2433               | -14375.3549 | -1677.5927 | 0.0000      | 0.0000    |
| 7902.5360              | 6109.0707   | 309.0288   | -1793.4653  | 6173.3271 |
| 306.9591               | 106.1476    | 2.8947     | 511540.4688 | -15.6465  |
| -15.6258               |             |            |             |           |
| [33275]ENERGY: 8380000 | 3218.9825   | 5287.1874  | 5438.3454   |           |
| 311.8320               | -14364.0602 | -1678.2646 | 0.0000      | 0.0000    |
| 7894.7963              | 6108.8188   | 308.7261   | -1785.9774  | 6173.9848 |
| 307.0293               | 219.9762    | 89.9355    | 511540.4688 | -12.8974  |
| -12.9042               |             |            |             |           |
| [33311]ENERGY: 8390000 | 3255.0637   | 5292.3416  | 5462.3343   |           |
| 319.7129               | -14293.6098 | -1721.5980 | 0.0000      | 0.0000    |
| 7796.0036              | 6110.2483   | 304.8628   | -1685.7553  | 6172.1490 |
| 307.0411               | -37.8034    | -73.5957   | 511540.4688 | -16.3600  |
| -16.3456               |             |            |             |           |

## Supplementary Text 6

|                        |             |            |             |           |
|------------------------|-------------|------------|-------------|-----------|
| [33364]ENERGY: 8400000 | 3288.5456   | 5295.6428  | 5444.4858   |           |
| 326.9811               | -14361.8580 | -1747.7154 | 0.0000      | 0.0000    |
| 7862.3997              | 6108.4817   | 307.4593   | -1753.9180  | 6173.1249 |
| 307.1608               | -72.1970    | -46.8412   | 511540.4688 | -16.1067  |
| -16.1184               |             |            |             |           |
| [33400]ENERGY: 8410000 | 3176.0447   | 5329.1422  | 5451.7326   |           |
| 333.0757               | -14393.3150 | -1619.2164 | 0.0000      | 0.0000    |
| 7834.1040              | 6111.5678   | 306.3528   | -1722.5362  | 6171.9985 |
| 307.1226               | 249.2581    | 161.5223   | 511540.4688 | -17.3321  |
| -17.3560               |             |            |             |           |
| [33450]ENERGY: 8420000 | 3190.9800   | 5328.6380  | 5465.5411   |           |
| 324.0647               | -14358.2479 | -1720.5333 | 0.0000      | 0.0000    |
| 7879.5341              | 6109.9768   | 308.1293   | -1769.5574  | 6173.3847 |
| 307.1583               | 107.7463    | -67.7999   | 511540.4688 | -16.7831  |
| -16.7619               |             |            |             |           |
| [33486]ENERGY: 8430000 | 3239.3247   | 5408.2330  | 5409.7059   |           |
| 331.2513               | -14402.7624 | -1755.3305 | 0.0000      | 0.0000    |
| 7881.1509              | 6111.5730   | 308.1925   | -1769.5779  | 6173.3936 |
| 307.0985               | 172.9968    | 158.0643   | 511540.4688 | -17.1786  |
| -17.1635               |             |            |             |           |
| [33536]ENERGY: 8440000 | 3228.9081   | 5274.4972  | 5507.9321   |           |
| 324.3735               | -14323.1089 | -1737.5700 | 0.0000      | 0.0000    |
| 7834.5591              | 6109.5911   | 306.3706   | -1724.9680  | 6173.9460 |
| 307.2178               | -42.8044    | -95.5585   | 511540.4688 | -17.0479  |
| -17.0594               |             |            |             |           |
| [33572]ENERGY: 8450000 | 3205.1765   | 5443.6760  | 5475.1211   |           |
| 316.4068               | -14387.0953 | -1715.4429 | 0.0000      | 0.0000    |
| 7770.9970              | 6108.8393   | 303.8850   | -1662.1577  | 6173.4991 |
| 307.0936               | -110.6239   | -145.9108  | 511540.4688 | -17.1052  |
| -17.1203               |             |            |             |           |
| [33622]ENERGY: 8460000 | 3217.7224   | 5299.1490  | 5456.5758   |           |
| 334.0359               | -14436.2798 | -1641.4448 | 0.0000      | 0.0000    |
| 7883.1214              | 6112.8798   | 308.2696   | -1770.2415  | 6175.1317 |
| 307.1977               | 82.5567     | 25.4958    | 511540.4688 | -19.6119  |
| -19.6152               |             |            |             |           |
| [33658]ENERGY: 8470000 | 3236.7490   | 5365.4992  | 5417.6707   |           |
| 322.1673               | -14343.1500 | -1654.5538 | 0.0000      | 0.0000    |
| 7773.9057              | 6118.2880   | 303.9987   | -1655.6177  | 6175.9956 |
| 307.1970               | 174.7128    | 102.7642   | 511540.4688 | -19.5872  |
| -19.5733               |             |            |             |           |
| [33708]ENERGY: 8480000 | 3231.2283   | 5389.6104  | 5451.3816   |           |
| 329.7039               | -14408.2559 | -1703.7594 | 0.0000      | 0.0000    |
| 7824.4229              | 6114.3317   | 305.9742   | -1710.0912  | 6175.4862 |
| 307.1245               | -53.3775    | -91.5024   | 511540.4688 | -14.4701  |
| -14.4601               |             |            |             |           |
| [33744]ENERGY: 8490000 | 3296.4365   | 5299.8596  | 5457.1639   |           |
| 357.2479               | -14355.3187 | -1761.8310 | 0.0000      | 0.0000    |
| 7820.3165              | 6113.8746   | 305.8136   | -1706.4419  | 6175.6874 |
| 307.2101               | 91.7447     | -71.6078   | 511540.4688 | -16.4814  |
| -16.4870               |             |            |             |           |
| [33797]ENERGY: 8500000 | 3201.0230   | 5368.7760  | 5442.8064   |           |
| 311.8142               | -14347.2942 | -1690.0735 | 0.0000      | 0.0000    |
| 7826.2105              | 6113.2623   | 306.0441   | -1712.9482  | 6175.7830 |
| 307.3481               | -7.9968     | -2.2970    | 511540.4688 | -19.8108  |

Supplementary Text 6

-19.8049  
 [33833]ENERGY: 8510000      3307.9811      5326.1080      5500.6321  
 327.2204      -14475.6424      -1677.7687      0.0000      0.0000  
 7801.0590      6109.5895      305.0605      -1691.4695      6175.7801  
 307.1765      55.6802      58.3749      511540.4688      -18.8862  
 -18.8944  
 [33883]ENERGY: 8520000      3308.6517      5293.3002      5434.3011  
 337.5427      -14348.7458      -1720.4622      0.0000      0.0000  
 7811.2005      6115.7882      305.4571      -1695.4123      6176.6416  
 307.1581      -136.2316      -207.5679      511540.4688      -16.8924  
 -16.8888  
 [33919]ENERGY: 8530000      3227.9883      5411.8881      5427.4841  
 311.6123      -14346.8870      -1765.7719      0.0000      0.0000  
 7847.0798      6113.3937      306.8602      -1733.6861      6177.5872  
 307.0744      -33.0266      -6.5387      511540.4688      -20.7841  
 -20.7916  
 [33969]ENERGY: 8540000      3265.8184      5344.6870      5457.0913  
 337.4718      -14449.7476      -1649.7439      0.0000      0.0000  
 7807.9258      6113.5027      305.3291      -1694.4231      6176.2642  
 306.9883      189.4583      91.5777      511540.4688      -18.9271  
 -18.9279  
 [34005]ENERGY: 8550000      3173.7267      5191.2097      5431.0621  
 325.1104      -14300.7015      -1681.0765      0.0000      0.0000  
 7974.3184      6113.6492      311.8358      -1860.6691      6176.9580  
 307.2141      237.1659      159.6134      511540.4688      -20.1464  
 -20.1433  
 [34055]ENERGY: 8560000      3196.7671      5263.3650      5471.8911  
 320.5656      -14389.5340      -1661.8803      0.0000      0.0000  
 7910.4365      6111.6110      309.3377      -1798.8255      6177.5893  
 306.9287      107.8199      33.2053      511540.4688      -19.3898  
 -19.3871  
 [34091]ENERGY: 8570000      3186.5265      5412.4139      5459.1597  
 340.7433      -14396.1668      -1706.0829      0.0000      0.0000  
 7818.6377      6115.2313      305.7479      -1703.4064      6179.0187  
 307.1001      -31.2186      -54.8709      511540.4688      -15.3877  
 -15.3914  
 [34141]ENERGY: 8580000      3270.6116      5361.2566      5480.8529  
 324.3291      -14451.8998      -1669.7084      0.0000      0.0000  
 7799.7360      6115.1780      305.0088      -1684.5580      6178.7915  
 307.2069      125.2885      54.2702      511540.4688      -14.7724  
 -14.7579  
 [34177]ENERGY: 8590000      3289.5897      5274.9640      5476.2606  
 330.8676      -14475.1117      -1681.5091      0.0000      0.0000  
 7901.7145      6116.7756      308.9967      -1784.9388      6180.5114  
 307.1272      9.6150      -31.4824      511540.4688      -19.7930  
 -19.7973  
 [34230]ENERGY: 8600000      3237.5240      5350.4715      5430.5926  
 318.4201      -14412.4223      -1671.5917      0.0000      0.0000  
 7866.5661      6119.5604      307.6222      -1747.0057      6178.6482  
 307.1556      -104.2852      -83.1202      511540.4688      -13.5029  
 -13.5110  
 [34266]ENERGY: 8610000      3233.9798      5323.4775      5488.4549  
 320.5059      -14302.7586      -1763.2920      0.0000      0.0000  
 7818.5702      6118.9377      305.7453      -1699.6325      6179.2560



## Supplementary Text 6

|                        |             |            |             |           |
|------------------------|-------------|------------|-------------|-----------|
| 307.0198               | -106.8690   | -105.6665  | 511540.4688 | -20.3027  |
| -20.2907               |             |            |             |           |
| [34316]ENERGY: 8620000 | 3247.9236   | 5348.7757  | 5442.9030   |           |
| 318.0064               | -14353.3950 | -1742.5636 | 0.0000      | 0.0000    |
| 7851.9509              | 6113.6008   | 307.0507   | -1738.3500  | 6179.2316 |
| 307.0924               | 15.7915     | -27.8459   | 511540.4688 | -18.7917  |
| -18.8051               |             |            |             |           |
| [34352]ENERGY: 8630000 | 3217.4555   | 5360.0205  | 5454.6471   |           |
| 327.6544               | -14348.5106 | -1742.3192 | 0.0000      | 0.0000    |
| 7843.8173              | 6112.7650   | 306.7326   | -1731.0523  | 6178.5762 |
| 307.2742               | -56.6191    | -75.9894   | 511540.4688 | -18.6179  |
| -18.6096               |             |            |             |           |
| [34402]ENERGY: 8640000 | 3260.2485   | 5294.0991  | 5448.6494   |           |
| 315.0857               | -14341.3542 | -1750.0885 | 0.0000      | 0.0000    |
| 7889.9440              | 6116.5840   | 308.5364   | -1773.3600  | 6179.4942 |
| 307.3228               | -61.5461    | -85.4128   | 511540.4688 | -18.3111  |
| -18.3198               |             |            |             |           |
| [34438]ENERGY: 8650000 | 3283.5709   | 5351.0125  | 5426.7456   |           |
| 320.6630               | -14482.9656 | -1658.3636 | 0.0000      | 0.0000    |
| 7876.5433              | 6117.2060   | 308.0123   | -1759.3372  | 6180.5919 |
| 307.4475               | 69.9294     | 19.6605    | 511540.4688 | -18.8877  |
| -18.9021               |             |            |             |           |
| [34488]ENERGY: 8660000 | 3162.3288   | 5385.2078  | 5460.9067   |           |
| 317.9292               | -14283.9199 | -1770.4884 | 0.0000      | 0.0000    |
| 7846.2242              | 6118.1884   | 306.8267   | -1728.0358  | 6180.5373 |
| 307.3554               | -100.4878   | -62.2105   | 511540.4688 | -19.6607  |
| -19.6209               |             |            |             |           |
| [34524]ENERGY: 8670000 | 3259.2607   | 5316.3530  | 5481.1270   |           |
| 306.6368               | -14322.1879 | -1697.3342 | 0.0000      | 0.0000    |
| 7776.7331              | 6120.5885   | 304.1093   | -1656.1446  | 6181.0817 |
| 307.2141               | 2.3318      | 118.2189   | 511540.4688 | -17.4104  |
| -17.4291               |             |            |             |           |
| [34574]ENERGY: 8680000 | 3246.8158   | 5271.3836  | 5415.2048   |           |
| 329.8248               | -14318.8038 | -1672.7144 | 0.0000      | 0.0000    |
| 7849.2844              | 6120.9952   | 306.9464   | -1728.2892  | 6182.6805 |
| 307.1952               | 161.0435    | -11.9331   | 511540.4688 | -17.0481  |
| -17.0556               |             |            |             |           |
| [34610]ENERGY: 8690000 | 3247.9538   | 5355.6880  | 5483.4969   |           |
| 318.8076               | -14422.4009 | -1694.2002 | 0.0000      | 0.0000    |
| 7832.9911              | 6122.3363   | 306.3092   | -1710.6547  | 6183.4895 |
| 307.3494               | -110.6242   | -68.0974   | 511540.4688 | -18.8949  |
| -18.8804               |             |            |             |           |
| [34663]ENERGY: 8700000 | 3271.3929   | 5476.6068  | 5452.4041   |           |
| 333.0614               | -14463.1715 | -1709.4832 | 0.0000      | 0.0000    |
| 7762.7102              | 6123.5208   | 303.5609   | -1639.1894  | 6184.7217 |
| 307.4055               | 172.5574    | 97.1740    | 511540.4688 | -15.7984  |
| -15.8268               |             |            |             |           |
| [34699]ENERGY: 8710000 | 3215.2304   | 5308.5698  | 5498.7386   |           |
| 315.1636               | -14382.6233 | -1696.7032 | 0.0000      | 0.0000    |
| 7861.5077              | 6119.8835   | 307.4244   | -1741.6241  | 6184.4615 |
| 307.4427               | -56.0633    | -116.3326  | 511540.4688 | -16.3174  |
| -16.3086               |             |            |             |           |
| [34749]ENERGY: 8720000 | 3242.1656   | 5365.0391  | 5424.2486   |           |
| 321.9226               | -14406.4062 | -1652.0806 | 0.0000      | 0.0000    |

## Supplementary Text 6

|                        |             |            |             |           |
|------------------------|-------------|------------|-------------|-----------|
| 7826.7954              | 6121.6846   | 306.0670   | -1705.1109  | 6184.0600 |
| 307.3513               | -33.0404    | -32.8990   | 511540.4688 | -16.8680  |
| -16.8528               |             |            |             |           |
| [34785]ENERGY: 8730000 | 3179.7657   | 5287.8193  | 5530.0548   |           |
| 327.5279               | -14360.0218 | -1711.0640 | 0.0000      | 0.0000    |
| 7866.0665              | 6120.1483   | 307.6027   | -1745.9182  | 6183.9888 |
| 307.2982               | 144.1894    | 64.8370    | 511540.4688 | -14.9706  |
| -14.9707               |             |            |             |           |
| [34835]ENERGY: 8740000 | 3236.9299   | 5327.2826  | 5467.1737   |           |
| 329.7050               | -14387.3073 | -1642.1193 | 0.0000      | 0.0000    |
| 7788.6692              | 6120.3338   | 304.5760   | -1668.3354  | 6182.2699 |
| 307.0003               | -60.7642    | 28.2904    | 511540.4688 | -19.7457  |
| -19.7454               |             |            |             |           |
| [34871]ENERGY: 8750000 | 3282.3276   | 5305.7449  | 5416.8472   |           |
| 309.0458               | -14370.2713 | -1671.5952 | 0.0000      | 0.0000    |
| 7846.8099              | 6118.9089   | 306.8496   | -1727.9010  | 6183.7036 |
| 307.2191               | 230.5784    | 87.7743    | 511540.4688 | -16.4209  |
| -16.4327               |             |            |             |           |
| [34921]ENERGY: 8760000 | 3362.4940   | 5382.6234  | 5419.1216   |           |
| 325.5453               | -14424.4574 | -1735.5008 | 0.0000      | 0.0000    |
| 7797.0016              | 6126.8277   | 304.9019   | -1670.1739  | 6184.4625 |
| 307.2273               | -89.5089    | -181.3633  | 511540.4688 | -17.5991  |
| -17.6083               |             |            |             |           |
| [34957]ENERGY: 8770000 | 3301.9194   | 5355.2086  | 5457.7520   |           |
| 323.6757               | -14463.2510 | -1696.8950 | 0.0000      | 0.0000    |
| 7845.1343              | 6123.5441   | 306.7841   | -1721.5902  | 6185.1023 |
| 307.2675               | 118.4907    | 87.6472    | 511540.4688 | -21.0036  |
| -20.9888               |             |            |             |           |
| [35007]ENERGY: 8780000 | 3348.5513   | 5301.1647  | 5440.9876   |           |
| 320.6135               | -14356.3060 | -1742.3649 | 0.0000      | 0.0000    |
| 7810.2711              | 6122.9172   | 305.4208   | -1687.3539  | 6184.7103 |
| 307.0769               | -121.5651   | -112.2150  | 511540.4688 | -18.8904  |
| -18.8965               |             |            |             |           |
| [35043]ENERGY: 8790000 | 3218.4282   | 5390.7365  | 5454.8984   |           |
| 330.9368               | -14448.4763 | -1669.2884 | 0.0000      | 0.0000    |
| 7844.0318              | 6121.2669   | 306.7410   | -1722.7649  | 6186.6780 |
| 307.3013               | 136.7298    | 42.6589    | 511540.4688 | -18.8319  |
| -18.8179               |             |            |             |           |
| [35096]ENERGY: 8800000 | 3274.3959   | 5326.3987  | 5491.3187   |           |
| 324.3949               | -14427.8246 | -1711.3724 | 0.0000      | 0.0000    |
| 7847.0716              | 6124.3828   | 306.8599   | -1722.6889  | 6187.4027 |
| 307.4624               | 109.3562    | 35.3853    | 511540.4688 | -19.8305  |
| -19.8574               |             |            |             |           |
| [35132]ENERGY: 8810000 | 3279.4933   | 5262.3587  | 5438.1033   |           |
| 312.7730               | -14313.6900 | -1724.1656 | 0.0000      | 0.0000    |
| 7869.1964              | 6124.0691   | 307.7250   | -1745.1272  | 6186.4890 |
| 307.4566               | 240.1065    | 220.7002   | 511540.4688 | -15.9984  |
| -15.9827               |             |            |             |           |
| [35182]ENERGY: 8820000 | 3293.6628   | 5372.0606  | 5418.7176   |           |
| 305.2522               | -14325.2660 | -1769.9459 | 0.0000      | 0.0000    |
| 7832.9856              | 6127.4669   | 306.3090   | -1705.5187  | 6187.1631 |
| 307.2860               | -141.4316   | -102.5031  | 511540.4688 | -20.9769  |
| -20.9934               |             |            |             |           |
| [35218]ENERGY: 8830000 | 3189.8084   | 5265.0804  | 5517.7613   |           |

## Supplementary Text 6

|                        |             |            |             |           |
|------------------------|-------------|------------|-------------|-----------|
| 298.0804               | -14297.1035 | -1717.5904 | 0.0000      | 0.0000    |
| 7868.1323              | 6124.1689   | 307.6834   | -1743.9634  | 6187.1253 |
| 307.2025               | 39.6868     | 101.7684   | 511540.4688 | -16.3869  |
| -16.3681               |             |            |             |           |
| [35268]ENERGY: 8840000 | 3235.6683   | 5386.4858  | 5431.8672   |           |
| 312.5202               | -14426.4547 | -1719.1817 | 0.0000      | 0.0000    |
| 7902.1666              | 6123.0718   | 309.0143   | -1779.0948  | 6187.1218 |
| 307.3035               | -77.6224    | 41.4956    | 511540.4688 | -12.3856  |
| -12.3564               |             |            |             |           |
| [35304]ENERGY: 8850000 | 3283.8880   | 5369.4481  | 5448.1020   |           |
| 327.8135               | -14360.5913 | -1753.0349 | 0.0000      | 0.0000    |
| 7812.6315              | 6128.2571   | 305.5131   | -1684.3745  | 6188.7953 |
| 307.3191               | -126.2699   | -127.5710  | 511540.4688 | -16.0618  |
| -16.0957               |             |            |             |           |
| [35354]ENERGY: 8860000 | 3284.7224   | 5340.2780  | 5414.9563   |           |
| 322.5553               | -14419.2034 | -1652.2662 | 0.0000      | 0.0000    |
| 7834.7714              | 6125.8139   | 306.3789   | -1708.9575  | 6188.2669 |
| 307.1817               | 82.8892     | 75.0836    | 511540.4688 | -15.2445  |
| -15.2508               |             |            |             |           |
| [35390]ENERGY: 8870000 | 3267.8588   | 5349.5797  | 5428.2842   |           |
| 321.7304               | -14352.0592 | -1757.2544 | 0.0000      | 0.0000    |
| 7866.9805              | 6125.1201   | 307.6384   | -1741.8604  | 6188.7894 |
| 307.2602               | -23.2924    | 14.3402    | 511540.4688 | -14.4011  |
| -14.3810               |             |            |             |           |
| [35440]ENERGY: 8880000 | 3246.8707   | 5439.9977  | 5465.3522   |           |
| 332.3863               | -14359.7468 | -1761.4809 | 0.0000      | 0.0000    |
| 7763.1882              | 6126.5672   | 303.5796   | -1636.6209  | 6188.1884 |
| 307.1529               | 19.8203     | -35.9273   | 511540.4688 | -19.2885  |
| -19.2915               |             |            |             |           |
| [35476]ENERGY: 8890000 | 3196.2272   | 5279.1755  | 5416.8341   |           |
| 352.4179               | -14310.2621 | -1693.4545 | 0.0000      | 0.0000    |
| 7882.2254              | 6123.1635   | 308.2345   | -1759.0619  | 6186.8382 |
| 307.2867               | -91.9229    | -44.9649   | 511540.4688 | -18.8110  |
| -18.8044               |             |            |             |           |
| [35529]ENERGY: 8900000 | 3257.5678   | 5293.8489  | 5488.6445   |           |
| 312.8130               | -14351.9139 | -1707.7327 | 0.0000      | 0.0000    |
| 7834.4193              | 6127.6468   | 306.3651   | -1706.7725  | 6188.7662 |
| 307.4440               | -118.2116   | -11.1059   | 511540.4688 | -16.9707  |
| -16.9668               |             |            |             |           |
| [35565]ENERGY: 8910000 | 3333.8335   | 5287.9346  | 5443.5087   |           |
| 314.2074               | -14387.5349 | -1678.6149 | 0.0000      | 0.0000    |
| 7812.0131              | 6125.3475   | 305.4889   | -1686.6656  | 6189.2039 |
| 307.3415               | -185.9688   | -89.0698   | 511540.4688 | -18.7404  |
| -18.7410               |             |            |             |           |
| [35615]ENERGY: 8920000 | 3246.6962   | 5387.8491  | 5469.9718   |           |
| 312.8869               | -14408.9546 | -1685.0863 | 0.0000      | 0.0000    |
| 7801.0646              | 6124.4277   | 305.0608   | -1676.6369  | 6186.9648 |
| 307.3200               | -32.6736    | 57.7351    | 511540.4688 | -16.6307  |
| -16.6415               |             |            |             |           |
| [35651]ENERGY: 8930000 | 3187.5854   | 5374.4641  | 5452.5257   |           |
| 317.3893               | -14372.1130 | -1624.2675 | 0.0000      | 0.0000    |
| 7794.0529              | 6129.6369   | 304.7866   | -1664.4160  | 6189.4295 |
| 307.4145               | 342.9132    | 244.6935   | 511540.4688 | -17.2679  |
| -17.2732               |             |            |             |           |

## Supplementary Text 6

|                        |             |            |             |           |
|------------------------|-------------|------------|-------------|-----------|
| [35701]ENERGY: 8940000 | 3296.1820   | 5312.5366  | 5487.0948   |           |
| 315.5233               | -14359.9922 | -1732.6869 | 0.0000      | 0.0000    |
| 7809.8301              | 6128.4877   | 305.4035   | -1681.3424  | 6189.3881 |
| 307.5664               | -131.8163   | -93.1451   | 511540.4688 | -15.3122  |
| -15.3069               |             |            |             |           |
| [35737]ENERGY: 8950000 | 3273.5988   | 5338.8236  | 5417.6302   |           |
| 330.9404               | -14324.2212 | -1770.8922 | 0.0000      | 0.0000    |
| 7861.1388              | 6127.0183   | 307.4100   | -1734.1205  | 6189.4608 |
| 307.3982               | 174.0525    | 42.1110    | 511540.4688 | -17.5485  |
| -17.5664               |             |            |             |           |
| [35787]ENERGY: 8960000 | 3263.5571   | 5355.8850  | 5509.5654   |           |
| 307.5702               | -14329.1071 | -1756.8606 | 0.0000      | 0.0000    |
| 7777.7082              | 6128.3182   | 304.1474   | -1649.3900  | 6190.1507 |
| 307.4080               | -100.1783   | -85.4387   | 511540.4688 | -13.4934  |
| -13.4935               |             |            |             |           |
| [35823]ENERGY: 8970000 | 3203.4965   | 5346.1560  | 5473.9214   |           |
| 318.3779               | -14370.6086 | -1708.2195 | 0.0000      | 0.0000    |
| 7861.7982              | 6124.9221   | 307.4357   | -1736.8762  | 6189.9424 |
| 307.4559               | 247.2667    | 201.3922   | 511540.4688 | -12.4602  |
| -12.4474               |             |            |             |           |
| [35873]ENERGY: 8980000 | 3212.8514   | 5360.6685  | 5475.7214   |           |
| 332.8086               | -14318.6990 | -1765.6973 | 0.0000      | 0.0000    |
| 7828.2581              | 6125.9117   | 306.1242   | -1702.3464  | 6190.3586 |
| 307.4778               | 190.4382    | -9.7323    | 511540.4688 | -19.8597  |
| -19.8605               |             |            |             |           |
| [35909]ENERGY: 8990000 | 3258.3781   | 5318.3172  | 5431.9548   |           |
| 322.4064               | -14357.8065 | -1744.4445 | 0.0000      | 0.0000    |
| 7892.3651              | 6121.1705   | 308.6311   | -1771.1946  | 6189.3288 |
| 307.3676               | -47.8260    | -28.9016   | 511540.4688 | -17.7665  |
| -17.7531               |             |            |             |           |
| [35962]ENERGY: 9000000 | 3298.9106   | 5367.8559  | 5427.7364   |           |
| 322.2336               | -14426.3195 | -1724.6382 | 0.0000      | 0.0000    |
| 7858.4776              | 6124.2564   | 307.3059   | -1734.2212  | 6189.5860 |
| 307.4779               | -156.2830   | -133.5547  | 511540.4688 | -13.4414  |
| -13.4550               |             |            |             |           |
| [35998]ENERGY: 9010000 | 3212.1604   | 5295.5450  | 5495.1111   |           |
| 338.4132               | -14387.4550 | -1688.4025 | 0.0000      | 0.0000    |
| 7860.8306              | 6126.2027   | 307.3979   | -1734.6279  | 6190.9194 |
| 307.3544               | 231.9439    | 137.5037   | 511540.4688 | -19.2507  |
| -19.2439               |             |            |             |           |
| [36048]ENERGY: 9020000 | 3229.1443   | 5339.9680  | 5413.1994   |           |
| 308.7609               | -14385.3163 | -1658.5415 | 0.0000      | 0.0000    |
| 7880.5140              | 6127.7287   | 308.1676   | -1752.7853  | 6191.5116 |
| 307.2332               | 142.3386    | 109.2290   | 511540.4688 | -14.6548  |
| -14.6594               |             |            |             |           |
| [36084]ENERGY: 9030000 | 3253.3914   | 5379.5880  | 5499.8563   |           |
| 323.5192               | -14321.3414 | -1762.0578 | 0.0000      | 0.0000    |
| 7754.9323              | 6127.8881   | 303.2567   | -1627.0442  | 6190.3100 |
| 307.2635               | -19.5437    | -33.6545   | 511540.4688 | -18.6727  |
| -18.6863               |             |            |             |           |
| [36134]ENERGY: 9040000 | 3197.2150   | 5322.6061  | 5532.1944   |           |
| 323.5563               | -14323.9200 | -1748.3167 | 0.0000      | 0.0000    |
| 7824.8283              | 6128.1633   | 305.9900   | -1696.6649  | 6191.0457 |
| 307.2671               | -69.9168    | 14.5744    | 511540.4688 | -17.3320  |

Supplementary Text 6

-17.3068  
 [36170]ENERGY: 9050000      3279.9509      5363.9874      5483.3298  
 304.3232      -14330.1155      -1773.6490      0.0000      0.0000  
 7801.1890      6129.0158      305.0656      -1672.1732      6191.2268  
 307.1636      -159.5533      -153.0240      511540.4688      -15.0783  
 -15.0899  
 [36220]ENERGY: 9060000      3243.7986      5304.5280      5438.3899  
 338.5577      -14385.3027      -1685.8570      0.0000      0.0000  
 7873.0399      6127.1545      307.8753      -1745.8855      6190.6301  
 307.2960      79.7510      50.6427      511540.4688      -19.5868  
 -19.5812  
 [36256]ENERGY: 9070000      3199.8412      5313.5653      5488.5695  
 308.8809      -14397.9400      -1708.6437      0.0000      0.0000  
 7920.3464      6124.6195      309.7253      -1795.7269      6189.5330  
 307.4809      101.8561      87.4673      511540.4688      -15.9371  
 -15.9604  
 [36306]ENERGY: 9080000      3304.6782      5380.6146      5500.4515  
 326.6170      -14407.6712      -1767.0058      0.0000      0.0000  
 7788.6052      6126.2894      304.5735      -1662.3157      6189.6368  
 307.3787      -207.7668      -150.5759      511540.4688      -15.7769  
 -15.7517  
 [36342]ENERGY: 9090000      3248.3810      5426.4277      5474.8278  
 331.9171      -14380.1964      -1680.7687      0.0000      0.0000  
 7707.8786      6128.4671      301.4167      -1579.4114      6190.6597  
 307.3572      -3.5672      -45.6558      511540.4688      -13.7106  
 -13.7280  
 [36395]ENERGY: 9100000      3176.6734      5307.5471      5500.7148  
 335.4186      -14341.5939      -1714.0239      0.0000      0.0000  
 7862.6848      6127.4209      307.4704      -1735.2639      6190.3741  
 307.4349      149.2849      118.6831      511540.4688      -16.1496  
 -16.1308  
 [36431]ENERGY: 9110000      3192.0990      5271.3765      5449.3778  
 314.1639      -14327.5683      -1731.9028      0.0000      0.0000  
 7957.4396      6124.9856      311.1758      -1832.4540      6189.2706  
 307.3613      -44.3283      -67.8627      511540.4688      -14.5822  
 -14.5923  
 [36481]ENERGY: 9120000      3217.3257      5302.1441      5452.1014  
 332.0076      -14456.8228      -1713.7370      0.0000      0.0000  
 7990.4868      6123.5059      312.4681      -1866.9809      6189.8087  
 307.3827      68.3645      28.9882      511540.4688      -14.8578  
 -14.8508  
 [36517]ENERGY: 9130000      3231.6078      5250.3857      5463.0736  
 320.1696      -14367.2282      -1751.1656      0.0000      0.0000  
 7976.1451      6122.9881      311.9073      -1853.1570      6189.5897  
 307.4902      8.4311      -93.7919      511540.4688      -14.4375  
 -14.4406  
 [36567]ENERGY: 9140000      3267.3720      5360.6375      5456.7924  
 355.5231      -14350.1756      -1730.3981      0.0000      0.0000  
 7766.4783      6126.2294      303.7083      -1640.2488      6189.9419  
 307.4621      -131.9947      -70.6834      511540.4688      -14.0892  
 -14.0860  
 [36603]ENERGY: 9150000      3206.7802      5313.3851      5417.4964  
 324.4760      -14312.2454      -1731.9525      0.0000      0.0000  
 7907.6313      6125.5712      309.2280      -1782.0601      6190.9986

## Supplementary Text 6

|                        |             |            |             |           |
|------------------------|-------------|------------|-------------|-----------|
| 307.4829               | -78.1706    | 4.9036     | 511540.4688 | -11.8709  |
| -11.8593               |             |            |             |           |
| [36653]ENERGY: 9160000 | 3381.8190   | 5295.0616  | 5473.8762   |           |
| 311.3767               | -14410.1008 | -1752.1082 | 0.0000      | 0.0000    |
| 7829.3059              | 6129.2304   | 306.1651   | -1700.0755  | 6191.9242 |
| 307.3905               | -18.9195    | -95.4437   | 511540.4688 | -21.9352  |
| -21.9530               |             |            |             |           |
| [36689]ENERGY: 9170000 | 3263.9351   | 5257.4528  | 5504.2708   |           |
| 323.9109               | -14399.2648 | -1676.0352 | 0.0000      | 0.0000    |
| 7855.9334              | 6130.2030   | 307.2064   | -1725.7304  | 6191.3782 |
| 307.4710               | -40.2844    | -63.9432   | 511540.4688 | -18.0007  |
| -17.9974               |             |            |             |           |
| [36739]ENERGY: 9180000 | 3159.0858   | 5383.0905  | 5415.9698   |           |
| 319.3973               | -14404.5265 | -1684.6439 | 0.0000      | 0.0000    |
| 7937.7796              | 6126.1526   | 310.4070   | -1811.6270  | 6191.8275 |
| 307.2553               | 106.9331    | 127.0940   | 511540.4688 | -14.5766  |
| -14.5825               |             |            |             |           |
| [36775]ENERGY: 9190000 | 3287.0567   | 5378.5211  | 5450.7280   |           |
| 315.4911               | -14387.3557 | -1737.3297 | 0.0000      | 0.0000    |
| 7821.5707              | 6128.6821   | 305.8626   | -1692.8886  | 6192.4042 |
| 307.2415               | -116.2223   | -93.0533   | 511540.4688 | -18.7471  |
| -18.7447               |             |            |             |           |
| [36828]ENERGY: 9200000 | 3236.2923   | 5289.5237  | 5481.4114   |           |
| 312.7053               | -14284.0972 | -1745.4739 | 0.0000      | 0.0000    |
| 7839.0545              | 6129.4160   | 306.5463   | -1709.6385  | 6192.1391 |
| 307.2611               | -131.5576   | 5.6112     | 511540.4688 | -16.1958  |
| -16.1675               |             |            |             |           |
| [36864]ENERGY: 9210000 | 3248.5038   | 5307.2613  | 5427.2244   |           |
| 330.7679               | -14448.2931 | -1670.0526 | 0.0000      | 0.0000    |
| 7929.5903              | 6125.0020   | 310.0868   | -1804.5883  | 6190.8480 |
| 307.2982               | -37.3865    | -56.5530   | 511540.4688 | -14.6050  |
| -14.6403               |             |            |             |           |
| [36914]ENERGY: 9220000 | 3234.4025   | 5343.7780  | 5401.7573   |           |
| 315.2723               | -14326.3579 | -1693.9757 | 0.0000      | 0.0000    |
| 7853.5931              | 6128.4696   | 307.1149   | -1725.1235  | 6191.3061 |
| 307.2256               | 30.1242     | 41.8217    | 511540.4688 | -16.0528  |
| -16.0322               |             |            |             |           |
| [36950]ENERGY: 9230000 | 3306.0297   | 5349.1343  | 5413.4867   |           |
| 311.3397               | -14342.6979 | -1729.6834 | 0.0000      | 0.0000    |
| 7819.1171              | 6126.7262   | 305.7667   | -1692.3909  | 6191.8774 |
| 307.3091               | -106.3041   | -131.1083  | 511540.4688 | -13.8040  |
| -13.8097               |             |            |             |           |
| [37000]ENERGY: 9240000 | 3296.5541   | 5337.2453  | 5444.3617   |           |
| 342.4295               | -14384.0343 | -1659.7471 | 0.0000      | 0.0000    |
| 7753.4447              | 6130.2538   | 303.1986   | -1623.1908  | 6190.2450 |
| 307.0958               | 47.8197     | 111.4716   | 511540.4688 | -25.4982  |
| -25.5081               |             |            |             |           |
| [37036]ENERGY: 9250000 | 3232.1194   | 5298.4306  | 5461.1809   |           |
| 306.4489               | -14388.8275 | -1673.5920 | 0.0000      | 0.0000    |
| 7892.8385              | 6128.5987   | 308.6496   | -1764.2397  | 6191.5973 |
| 307.3921               | 50.3357     | 16.3080    | 511540.4688 | -16.1087  |
| -16.1023               |             |            |             |           |
| [37086]ENERGY: 9260000 | 3220.1485   | 5217.3767  | 5497.0255   |           |
| 321.3274               | -14364.4727 | -1668.9570 | 0.0000      | 0.0000    |

## Supplementary Text 6

|                        |             |            |             |           |
|------------------------|-------------|------------|-------------|-----------|
| 7906.1052              | 6128.5536   | 309.1684   | -1777.5516  | 6191.8723 |
| 307.4809               | 72.1517     | 40.6796    | 511540.4688 | -19.7225  |
| -19.7257               |             |            |             |           |
| [37122]ENERGY: 9270000 | 3290.5167   | 5344.0145  | 5495.4677   |           |
| 304.5606               | -14401.0374 | -1698.1484 | 0.0000      | 0.0000    |
| 7791.6650              | 6127.0386   | 304.6932   | -1664.6263  | 6191.5049 |
| 307.4422               | -103.4770   | 106.2646   | 511540.4688 | -17.8110  |
| -17.8159               |             |            |             |           |
| [37172]ENERGY: 9280000 | 3247.1930   | 5228.7398  | 5519.4219   |           |
| 304.4632               | -14355.7309 | -1692.3871 | 0.0000      | 0.0000    |
| 7875.3619              | 6127.0617   | 307.9661   | -1748.3003  | 6192.2461 |
| 307.2292               | -86.0449    | -43.1589   | 511540.4688 | -17.4954  |
| -17.5067               |             |            |             |           |
| [37208]ENERGY: 9290000 | 3218.4109   | 5327.9864  | 5478.7848   |           |
| 317.7772               | -14384.2225 | -1719.9658 | 0.0000      | 0.0000    |
| 7889.0116              | 6127.7827   | 308.4999   | -1761.2289  | 6191.7331 |
| 307.1855               | 128.2884    | 14.6550    | 511540.4688 | -18.3779  |
| -18.3803               |             |            |             |           |
| [37261]ENERGY: 9300000 | 3238.4053   | 5338.2102  | 5450.1171   |           |
| 309.9450               | -14350.0242 | -1652.6417 | 0.0000      | 0.0000    |
| 7797.8163              | 6131.8281   | 304.9337   | -1665.9882  | 6194.7311 |
| 307.3351               | 5.6840      | -18.8630   | 511540.4688 | -18.0906  |
| -18.0755               |             |            |             |           |
| [37297]ENERGY: 9310000 | 3211.7166   | 5389.3459  | 5456.1847   |           |
| 312.7876               | -14379.2405 | -1685.7686 | 0.0000      | 0.0000    |
| 7825.0106              | 6130.0364   | 305.9972   | -1694.9742  | 6191.7860 |
| 307.2368               | 152.4499    | 90.3834    | 511540.4688 | -18.4528  |
| -18.4418               |             |            |             |           |
| [37347]ENERGY: 9320000 | 3226.8303   | 5306.2683  | 5446.5025   |           |
| 316.5407               | -14337.5462 | -1731.9276 | 0.0000      | 0.0000    |
| 7903.7284              | 6130.3964   | 309.0754   | -1773.3320  | 6194.4149 |
| 307.5686               | 155.7637    | 21.4981    | 511540.4688 | -16.5231  |
| -16.5438               |             |            |             |           |
| [37383]ENERGY: 9330000 | 3292.8547   | 5270.6192  | 5465.5454   |           |
| 321.2403               | -14396.3695 | -1672.9831 | 0.0000      | 0.0000    |
| 7845.8392              | 6126.7463   | 306.8117   | -1719.0929  | 6192.8756 |
| 307.5272               | -185.5091   | -187.3246  | 511540.4688 | -14.8729  |
| -14.8496               |             |            |             |           |
| [37433]ENERGY: 9340000 | 3262.1787   | 5350.5367  | 5442.7746   |           |
| 324.8857               | -14353.8905 | -1664.9209 | 0.0000      | 0.0000    |
| 7771.2621              | 6132.8264   | 303.8953   | -1638.4357  | 6194.3038 |
| 307.3116               | 214.6410    | 172.4144   | 511540.4688 | -16.7908  |
| -16.8065               |             |            |             |           |
| [37469]ENERGY: 9350000 | 3282.8456   | 5230.4928  | 5444.0726   |           |
| 331.3393               | -14412.9561 | -1674.8665 | 0.0000      | 0.0000    |
| 7929.8896              | 6130.8173   | 310.0985   | -1799.0723  | 6193.4770 |
| 307.3096               | 51.8685     | 7.9829     | 511540.4688 | -18.9545  |
| -18.9556               |             |            |             |           |
| [37519]ENERGY: 9360000 | 3316.1278   | 5261.2555  | 5453.1615   |           |
| 330.9423               | -14265.5250 | -1792.8346 | 0.0000      | 0.0000    |
| 7831.7731              | 6134.9007   | 306.2616   | -1696.8724  | 6193.3718 |
| 307.3545               | -144.8454   | -152.5929  | 511540.4688 | -20.9106  |
| -20.8982               |             |            |             |           |
| [37555]ENERGY: 9370000 | 3232.6091   | 5300.0009  | 5475.7049   |           |

## Supplementary Text 6

|                        |             |            |             |           |
|------------------------|-------------|------------|-------------|-----------|
| 334.4799               | -14461.9672 | -1657.5291 | 0.0000      | 0.0000    |
| 7905.4833              | 6128.7817   | 309.1440   | -1776.7015  | 6194.5398 |
| 307.4654               | 41.6823     | -19.1117   | 511540.4688 | -18.5993  |
| -18.6129               |             |            |             |           |
| [37605]ENERGY: 9380000 | 3279.0120   | 5335.0418  | 5469.8938   |           |
| 329.6757               | -14391.3508 | -1729.4267 | 0.0000      | 0.0000    |
| 7837.4216              | 6130.2674   | 306.4825   | -1707.1542  | 6194.6388 |
| 307.3669               | 93.1633     | 41.3494    | 511540.4688 | -19.8164  |
| -19.8178               |             |            |             |           |
| [37641]ENERGY: 9390000 | 3228.6071   | 5238.1962  | 5421.9957   |           |
| 329.1353               | -14345.0772 | -1693.7654 | 0.0000      | 0.0000    |
| 7952.1314              | 6131.2231   | 310.9682   | -1820.9083  | 6194.7110 |
| 307.2966               | -0.5879     | -45.6729   | 511540.4688 | -18.5703  |
| -18.5387               |             |            |             |           |
| [37694]ENERGY: 9400000 | 3243.0164   | 5342.8943  | 5472.1055   |           |
| 340.5108               | -14333.2794 | -1761.5359 | 0.0000      | 0.0000    |
| 7826.5487              | 6130.2605   | 306.0573   | -1696.2882  | 6195.8106 |
| 307.2315               | 214.0785    | -0.0822    | 511540.4688 | -18.8414  |
| -18.8552               |             |            |             |           |
| [37730]ENERGY: 9410000 | 3239.7158   | 5266.9838  | 5460.1205   |           |
| 337.0278               | -14341.3917 | -1666.2034 | 0.0000      | 0.0000    |
| 7836.6655              | 6132.9185   | 306.4529   | -1703.7471  | 6195.9599 |
| 307.4183               | 55.2961     | 59.7126    | 511540.4688 | -20.1416  |
| -20.1403               |             |            |             |           |
| [37780]ENERGY: 9420000 | 3350.5205   | 5315.7298  | 5420.6054   |           |
| 310.5204               | -14331.9219 | -1777.9600 | 0.0000      | 0.0000    |
| 7847.3628              | 6134.8570   | 306.8712   | -1712.5059  | 6195.4203 |
| 307.2819               | -167.8281   | -51.8011   | 511540.4688 | -22.7414  |
| -22.7578               |             |            |             |           |
| [37816]ENERGY: 9430000 | 3310.9400   | 5325.2559  | 5440.7784   |           |
| 307.9094               | -14342.5582 | -1744.7671 | 0.0000      | 0.0000    |
| 7835.3437              | 6132.9021   | 306.4012   | -1702.4417  | 6195.9382 |
| 307.2908               | -258.3162   | -201.6313  | 511540.4688 | -14.7640  |
| -14.7374               |             |            |             |           |
| [37866]ENERGY: 9440000 | 3290.0275   | 5372.2106  | 5464.8053   |           |
| 343.0500               | -14348.9431 | -1740.9670 | 0.0000      | 0.0000    |
| 7753.3734              | 6133.5567   | 303.1958   | -1619.8167  | 6195.1226 |
| 307.3430               | -251.3546   | -250.4667  | 511540.4688 | -20.8677  |
| -20.8815               |             |            |             |           |
| [37902]ENERGY: 9450000 | 3249.4730   | 5366.2552  | 5477.5662   |           |
| 334.9666               | -14442.5831 | -1668.2033 | 0.0000      | 0.0000    |
| 7815.5171              | 6132.9917   | 305.6259   | -1682.5254  | 6193.9834 |
| 307.2850               | 53.2298     | 19.7802    | 511540.4688 | -17.8030  |
| -17.7982               |             |            |             |           |
| [37952]ENERGY: 9460000 | 3266.7774   | 5309.6167  | 5452.9204   |           |
| 308.0589               | -14400.7517 | -1671.2890 | 0.0000      | 0.0000    |
| 7863.1708              | 6128.5035   | 307.4894   | -1734.6673  | 6194.2696 |
| 307.2606               | 5.7411      | -5.5310    | 511540.4688 | -22.4523  |
| -22.4545               |             |            |             |           |
| [37988]ENERGY: 9470000 | 3282.2421   | 5283.8485  | 5462.9818   |           |
| 335.2113               | -14352.1910 | -1705.9853 | 0.0000      | 0.0000    |
| 7827.3770              | 6133.4844   | 306.0897   | -1693.8926  | 6194.2049 |
| 307.2892               | -76.3996    | -61.5878   | 511540.4688 | -22.7120  |
| -22.7112               |             |            |             |           |



## Supplementary Text 6

|                        |             |            |             |           |
|------------------------|-------------|------------|-------------|-----------|
| [38038]ENERGY: 9480000 | 3294.7698   | 5319.5384  | 5405.9344   |           |
| 306.1155               | -14331.6705 | -1733.2149 | 0.0000      | 0.0000    |
| 7867.0757              | 6128.5485   | 307.6421   | -1738.5272  | 6193.6452 |
| 307.2279               | -79.4615    | -122.3456  | 511540.4688 | -22.7727  |
| -22.7845               |             |            |             |           |
| [38074]ENERGY: 9490000 | 3331.5682   | 5360.3365  | 5409.8816   |           |
| 331.7118               | -14376.7126 | -1750.6962 | 0.0000      | 0.0000    |
| 7828.5560              | 6134.6453   | 306.1358   | -1693.9106  | 6195.0732 |
| 307.4084               | -257.2582   | -248.3808  | 511540.4688 | -22.8486  |
| -22.8550               |             |            |             |           |
| [38127]ENERGY: 9500000 | 3292.2138   | 5307.8598  | 5456.2959   |           |
| 319.0874               | -14450.2012 | -1665.9779 | 0.0000      | 0.0000    |
| 7869.5914              | 6128.8692   | 307.7405   | -1740.7222  | 6194.2286 |
| 307.3052               | 111.5739    | 103.6881   | 511540.4688 | -19.6872  |
| -19.6806               |             |            |             |           |
| [38163]ENERGY: 9510000 | 3222.5367   | 5351.2759  | 5466.3568   |           |
| 335.9071               | -14326.9563 | -1702.7118 | 0.0000      | 0.0000    |
| 7784.8447              | 6131.2532   | 304.4265   | -1653.5916  | 6195.2394 |
| 307.5000               | 113.0156    | 153.5277   | 511540.4688 | -24.0584  |
| -24.0318               |             |            |             |           |
| [38213]ENERGY: 9520000 | 3256.4728   | 5324.8255  | 5474.2150   |           |
| 324.1225               | -14441.4252 | -1669.8103 | 0.0000      | 0.0000    |
| 7863.1714              | 6131.5717   | 307.4894   | -1731.5997  | 6193.8542 |
| 307.6155               | -202.7616   | -134.6931  | 511540.4688 | -22.1733  |
| -22.1879               |             |            |             |           |
| [38249]ENERGY: 9530000 | 3300.0622   | 5372.9810  | 5421.9765   |           |
| 310.3737               | -14299.9191 | -1778.6296 | 0.0000      | 0.0000    |
| 7802.8738              | 6129.7185   | 305.1315   | -1673.1552  | 6194.7597 |
| 307.5539               | 81.8995     | 54.5597    | 511540.4688 | -18.1762  |
| -18.2035               |             |            |             |           |
| [38299]ENERGY: 9540000 | 3249.4096   | 5287.1362  | 5471.1742   |           |
| 325.9597               | -14379.3019 | -1753.6330 | 0.0000      | 0.0000    |
| 7931.2548              | 6131.9996   | 310.1518   | -1799.2553  | 6196.1468 |
| 307.3247               | -260.1040   | -248.3984  | 511540.4688 | -16.7174  |
| -16.7070               |             |            |             |           |
| [38335]ENERGY: 9550000 | 3132.0273   | 5183.5798  | 5483.1353   |           |
| 327.8993               | -14248.2413 | -1718.8120 | 0.0000      | 0.0000    |
| 7969.3744              | 6128.9629   | 311.6425   | -1840.4115  | 6195.9485 |
| 307.4584               | 131.9589    | 90.2854    | 511540.4688 | -17.9924  |
| -17.9828               |             |            |             |           |
| [38385]ENERGY: 9560000 | 3243.6430   | 5353.1718  | 5495.7864   |           |
| 309.2896               | -14366.2028 | -1705.9661 | 0.0000      | 0.0000    |
| 7804.7284              | 6134.4503   | 305.2040   | -1670.2781  | 6196.7785 |
| 307.4916               | 23.6201     | -4.8094    | 511540.4688 | -17.4169  |
| -17.4220               |             |            |             |           |
| [38421]ENERGY: 9570000 | 3232.8774   | 5332.8011  | 5461.9198   |           |
| 299.3216               | -14377.2241 | -1696.8789 | 0.0000      | 0.0000    |
| 7879.6516              | 6132.4685   | 308.1339   | -1747.1831  | 6195.5900 |
| 307.7215               | 0.0595      | 76.5258    | 511540.4688 | -18.9709  |
| -18.9404               |             |            |             |           |
| [38471]ENERGY: 9580000 | 3295.6455   | 5261.6694  | 5439.5384   |           |
| 320.4710               | -14337.8857 | -1702.6480 | 0.0000      | 0.0000    |
| 7856.5383              | 6133.3288   | 307.2301   | -1723.2095  | 6195.3964 |
| 307.7810               | -17.9715    | -95.4535   | 511540.4688 | -21.2216  |

Supplementary Text 6

-21.2417  
 [38507]ENERGY: 9590000      3285.0236      5322.0912      5479.6497  
 297.5682      -14437.4116      -1696.5652      0.0000      0.0000  
 7879.4926      6129.8486      308.1277      -1749.6440      6196.6767  
 307.4428      101.8894      102.8899      511540.4688      -17.7557  
 -17.7982  
 [38560]ENERGY: 9600000      3196.8417      5292.5515      5441.3758  
 329.8793      -14382.9658      -1610.0258      0.0000      0.0000  
 7865.6223      6133.2791      307.5853      -1732.3433      6195.4419  
 307.5196      145.2261      168.1447      511540.4688      -19.2597  
 -19.2175  
 [38596]ENERGY: 9610000      3289.3911      5295.3227      5481.5977  
 314.7608      -14412.4454      -1686.5622      0.0000      0.0000  
 7850.9317      6132.9963      307.0108      -1717.9353      6196.9142  
 307.5762      155.1345      35.8130      511540.4688      -16.5958  
 -16.5916  
 [38646]ENERGY: 9620000      3194.0118      5278.5741      5398.9610  
 325.1981      -14248.6633      -1776.7957      0.0000      0.0000  
 7962.8163      6134.1023      311.3861      -1828.7140      6196.8578  
 307.6230      48.3444      -104.0927      511540.4688      -17.5080  
 -17.5342  
 [38682]ENERGY: 9630000      3353.2844      5335.1069      5441.5790  
 299.3631      -14307.8240      -1773.4887      0.0000      0.0000  
 7787.0660      6135.0867      304.5133      -1651.9793      6196.1300  
 307.7543      -209.9053      -229.5033      511540.4688      -21.6547  
 -21.6334  
 [38732]ENERGY: 9640000      3380.2584      5294.4443      5494.5797  
 345.6032      -14451.4989      -1767.1122      0.0000      0.0000  
 7834.7551      6131.0296      306.3782      -1703.7255      6196.0367  
 307.6344      -283.3722      -297.4211      511540.4688      -24.6857  
 -24.6792  
 [38768]ENERGY: 9650000      3303.7072      5337.3097      5461.6735  
 311.6011      -14329.9584      -1753.7909      0.0000      0.0000  
 7804.8173      6135.3596      305.2075      -1669.4577      6196.5546  
 307.3814      35.6319      19.8987      511540.4688      -19.1532  
 -19.1711  
 [38818]ENERGY: 9660000      3308.6497      5317.0268      5456.2473  
 332.3205      -14374.5442      -1720.6594      0.0000      0.0000  
 7817.0280      6136.0688      305.6850      -1680.9592      6197.0571  
 307.5154      98.6506      -5.8678      511540.4688      -21.9426  
 -21.9265  
 [38854]ENERGY: 9670000      3199.6888      5346.5554      5493.4092  
 314.5197      -14373.5294      -1735.1015      0.0000      0.0000  
 7885.5982      6131.1404      308.3664      -1754.4578      6196.3851  
 307.5073      -38.6982      -36.4215      511540.4688      -20.1386  
 -20.1459  
 [38904]ENERGY: 9680000      3299.2214      5319.8721      5454.0792  
 336.4419      -14423.3326      -1708.6419      0.0000      0.0000  
 7854.5904      6132.2304      307.1539      -1722.3600      6196.7879  
 307.5818      73.6829      114.1449      511540.4688      -19.4805  
 -19.4604  
 [38940]ENERGY: 9690000      3335.5617      5329.2300      5436.5720  
 333.5858      -14342.4872      -1808.8167      0.0000      0.0000  
 7850.7479      6134.3935      307.0036      -1716.3544      6197.4505

## Supplementary Text 6

|                        |             |            |             |           |
|------------------------|-------------|------------|-------------|-----------|
| 307.8010               | -372.0382   | -304.3765  | 511540.4688 | -18.8203  |
| -18.8232               |             |            |             |           |
| [38993]ENERGY: 9700000 | 3276.9924   | 5304.4034  | 5427.5284   |           |
| 330.8324               | -14304.1769 | -1669.4182 | 0.0000      | 0.0000    |
| 7768.3857              | 6134.5473   | 303.7828   | -1633.8384  | 6197.2601 |
| 307.7437               | -35.3937    | -0.8679    | 511540.4688 | -23.7785  |
| -23.7899               |             |            |             |           |
| [39029]ENERGY: 9710000 | 3261.5540   | 5281.9446  | 5477.3621   |           |
| 336.5118               | -14296.1830 | -1799.5524 | 0.0000      | 0.0000    |
| 7873.6468              | 6135.2840   | 307.8991   | -1738.3629  | 6197.7441 |
| 307.3863               | -62.6939    | -88.5736   | 511540.4688 | -18.3419  |
| -18.3317               |             |            |             |           |
| [39079]ENERGY: 9720000 | 3252.7837   | 5356.6398  | 5440.5940   |           |
| 330.4467               | -14307.5966 | -1756.4257 | 0.0000      | 0.0000    |
| 7817.2977              | 6133.7397   | 305.6955   | -1683.5580  | 6197.2364 |
| 307.3823               | -2.6516     | 54.8870    | 511540.4688 | -20.1945  |
| -20.2073               |             |            |             |           |
| [39115]ENERGY: 9730000 | 3274.3248   | 5319.2522  | 5448.0805   |           |
| 327.8218               | -14266.7703 | -1795.9076 | 0.0000      | 0.0000    |
| 7827.2402              | 6134.0417   | 306.0844   | -1693.1986  | 6197.0754 |
| 307.3324               | -176.2592   | -110.9795  | 511540.4688 | -20.5148  |
| -20.5291               |             |            |             |           |
| [39165]ENERGY: 9740000 | 3333.1088   | 5287.7989  | 5436.6237   |           |
| 323.1925               | -14386.6706 | -1646.9812 | 0.0000      | 0.0000    |
| 7789.8751              | 6136.9472   | 304.6232   | -1652.9279  | 6196.5227 |
| 307.6510               | -130.5890   | -146.6053  | 511540.4688 | -16.5142  |
| -16.5084               |             |            |             |           |
| [39201]ENERGY: 9750000 | 3285.3069   | 5239.3301  | 5481.9213   |           |
| 342.9980               | -14389.8075 | -1731.2697 | 0.0000      | 0.0000    |
| 7902.8566              | 6131.3356   | 309.0413   | -1771.5210  | 6197.4535 |
| 307.6759               | -30.8471    | -44.3701   | 511540.4688 | -14.5707  |
| -14.5569               |             |            |             |           |
| [39251]ENERGY: 9760000 | 3163.0285   | 5304.0698  | 5495.4973   |           |
| 302.6502               | -14418.9978 | -1689.3072 | 0.0000      | 0.0000    |
| 7979.1161              | 6136.0569   | 312.0235   | -1843.0591  | 6197.7930 |
| 307.6393               | 68.9372     | 17.8115    | 511540.4688 | -12.2234  |
| -12.2541               |             |            |             |           |
| [39287]ENERGY: 9770000 | 3305.2330   | 5316.4715  | 5440.4601   |           |
| 316.7301               | -14423.6077 | -1703.4811 | 0.0000      | 0.0000    |
| 7882.2850              | 6134.0910   | 308.2369   | -1748.1941  | 6198.3839 |
| 307.8242               | -101.7939   | -55.3556   | 511540.4688 | -13.5543  |
| -13.5289               |             |            |             |           |
| [39337]ENERGY: 9780000 | 3286.2112   | 5284.1032  | 5452.7756   |           |
| 312.8710               | -14336.7353 | -1728.2265 | 0.0000      | 0.0000    |
| 7867.1657              | 6138.1649   | 307.6456   | -1729.0007  | 6198.6850 |
| 307.7634               | -115.4131   | -142.0771  | 511540.4688 | -12.4617  |
| -12.4437               |             |            |             |           |
| [39373]ENERGY: 9790000 | 3314.1938   | 5313.1813  | 5442.3793   |           |
| 318.9636               | -14379.9588 | -1691.9368 | 0.0000      | 0.0000    |
| 7819.2280              | 6136.0505   | 305.7710   | -1683.1775  | 6198.7508 |
| 307.6809               | 217.8606    | 83.4797    | 511540.4688 | -15.9247  |
| -15.9528               |             |            |             |           |
| [39426]ENERGY: 9800000 | 3294.8122   | 5368.7854  | 5394.8191   |           |
| 325.2471               | -14344.9786 | -1728.5794 | 0.0000      | 0.0000    |

## Supplementary Text 6

|                        |             |            |             |           |
|------------------------|-------------|------------|-------------|-----------|
| 7829.0750              | 6139.1808   | 306.1561   | -1689.8942  | 6199.5352 |
| 307.7340               | 5.3279      | 12.7924    | 511540.4688 | -17.6241  |
| -17.6226               |             |            |             |           |
| [39462]ENERGY: 9810000 | 3286.2460   | 5294.5511  | 5393.4009   |           |
| 309.0122               | -14352.2274 | -1699.5052 | 0.0000      | 0.0000    |
| 7900.9366              | 6132.4141   | 308.9662   | -1768.5225  | 6198.8115 |
| 307.7481               | 21.9049     | -135.3792  | 511540.4688 | -14.5194  |
| -14.5081               |             |            |             |           |
| [39512]ENERGY: 9820000 | 3118.8066   | 5423.6963  | 5436.6662   |           |
| 318.7173               | -14407.6903 | -1729.3005 | 0.0000      | 0.0000    |
| 7970.7736              | 6131.6692   | 311.6972   | -1839.1044  | 6198.7584 |
| 307.6920               | 91.8928     | 83.3867    | 511540.4688 | -9.0537   |
| -9.0718                |             |            |             |           |
| [39548]ENERGY: 9830000 | 3267.7113   | 5339.5029  | 5455.4300   |           |
| 317.8703               | -14327.6512 | -1769.5558 | 0.0000      | 0.0000    |
| 7853.3593              | 6136.6668   | 307.1057   | -1716.6925  | 6198.2640 |
| 307.4608               | -123.4138   | -147.7022  | 511540.4688 | -18.4717  |
| -18.4707               |             |            |             |           |
| [39598]ENERGY: 9840000 | 3226.7116   | 5343.3586  | 5474.1866   |           |
| 341.9377               | -14471.2793 | -1661.3034 | 0.0000      | 0.0000    |
| 7879.8421              | 6133.4539   | 308.1413   | -1746.3882  | 6199.2027 |
| 307.4517               | -48.8542    | -64.0722   | 511540.4688 | -12.4734  |
| -12.4731               |             |            |             |           |
| [39634]ENERGY: 9850000 | 3254.4559   | 5338.1556  | 5430.8708   |           |
| 307.8221               | -14293.6540 | -1674.5582 | 0.0000      | 0.0000    |
| 7777.6555              | 6140.7477   | 304.1453   | -1636.9078  | 6201.9811 |
| 307.5065               | 128.2004    | 13.1589    | 511540.4688 | -13.6048  |
| -13.5975               |             |            |             |           |
| [39684]ENERGY: 9860000 | 3313.9813   | 5297.2381  | 5430.6254   |           |
| 299.4085               | -14379.6328 | -1674.9512 | 0.0000      | 0.0000    |
| 7853.4467              | 6140.1159   | 307.1092   | -1713.3308  | 6202.3252 |
| 307.4829               | -38.9455    | -36.5737   | 511540.4688 | -12.6450  |
| -12.6338               |             |            |             |           |
| [39720]ENERGY: 9870000 | 3180.1284   | 5280.8707  | 5494.3149   |           |
| 334.6166               | -14300.8216 | -1710.8807 | 0.0000      | 0.0000    |
| 7859.2022              | 6137.4304   | 307.3342   | -1721.7717  | 6202.5528 |
| 307.5007               | 257.0650    | 107.6377   | 511540.4688 | -13.2992  |
| -13.3192               |             |            |             |           |
| [39770]ENERGY: 9880000 | 3284.5320   | 5242.6180  | 5450.6813   |           |
| 309.8499               | -14318.3392 | -1742.6944 | 0.0000      | 0.0000    |
| 7912.1801              | 6138.8278   | 309.4059   | -1773.3523  | 6202.8335 |
| 307.3204               | 19.3309     | 4.2389     | 511540.4688 | -12.1161  |
| -12.1113               |             |            |             |           |
| [39806]ENERGY: 9890000 | 3294.6827   | 5275.6645  | 5473.7062   |           |
| 320.9579               | -14445.0970 | -1689.0460 | 0.0000      | 0.0000    |
| 7910.2408              | 6141.1090   | 309.3301   | -1769.1318  | 6202.8201 |
| 307.5656               | 76.6588     | 79.8610    | 511540.4688 | -12.5260  |
| -12.5107               |             |            |             |           |
| [39859]ENERGY: 9900000 | 3254.1648   | 5297.4182  | 5501.8762   |           |
| 332.8024               | -14341.6454 | -1739.2191 | 0.0000      | 0.0000    |
| 7834.7939              | 6140.1911   | 306.3797   | -1694.6028  | 6203.6822 |
| 307.4405               | -17.0522    | -48.1992   | 511540.4688 | -8.9403   |
| -8.9520                |             |            |             |           |
| [39895]ENERGY: 9910000 | 3155.5488   | 5361.8460  | 5364.4159   |           |

## Supplementary Text 6

|                         |             |            |             |           |
|-------------------------|-------------|------------|-------------|-----------|
| 316.4572                | -14270.3711 | -1689.7919 | 0.0000      | 0.0000    |
| 7900.2969               | 6138.4019   | 308.9412   | -1761.8950  | 6203.7312 |
| 307.5026                | 27.0999     | 25.8103    | 511540.4688 | -15.4289  |
| -15.4232                |             |            |             |           |
| [39945]ENERGY: 9920000  | 3269.3981   | 5172.8039  | 5434.4729   |           |
| 314.4013                | -14339.8798 | -1719.3981 | 0.0000      | 0.0000    |
| 8006.8575               | 6138.6558   | 313.1083   | -1868.2017  | 6203.4555 |
| 307.3898                | -7.1545     | -29.3806   | 511540.4688 | -13.9719  |
| -13.9760                |             |            |             |           |
| [39981]ENERGY: 9930000  | 3237.7846   | 5297.6955  | 5465.2039   |           |
| 345.0559                | -14381.7247 | -1681.2297 | 0.0000      | 0.0000    |
| 7855.8417               | 6138.6272   | 307.2028   | -1717.2145  | 6202.5956 |
| 307.5113                | 219.5050    | 167.1770   | 511540.4688 | -15.3471  |
| -15.3389                |             |            |             |           |
| [40031]ENERGY: 9940000  | 3193.1349   | 5379.2533  | 5526.0669   |           |
| 322.0517                | -14366.8133 | -1767.8389 | 0.0000      | 0.0000    |
| 7854.3655               | 6140.2199   | 307.1451   | -1714.1455  | 6204.0161 |
| 307.6087                | -44.1337    | -8.4313    | 511540.4688 | -14.9536  |
| -14.9513                |             |            |             |           |
| [40067]ENERGY: 9950000  | 3160.3474   | 5293.1349  | 5507.9227   |           |
| 325.7819                | -14344.9964 | -1654.3187 | 0.0000      | 0.0000    |
| 7852.3121               | 6140.1839   | 307.0648   | -1712.1282  | 6204.0457 |
| 307.4243                | 95.1921     | 74.5281    | 511540.4688 | -13.4878  |
| -13.4802                |             |            |             |           |
| [40117]ENERGY: 9960000  | 3300.5388   | 5331.6889  | 5503.2155   |           |
| 306.9971                | -14406.4474 | -1714.7636 | 0.0000      | 0.0000    |
| 7819.9102               | 6141.1395   | 305.7977   | -1678.7707  | 6203.2378 |
| 307.1898                | 69.1421     | -62.9680   | 511540.4688 | -16.3069  |
| -16.3256                |             |            |             |           |
| [40153]ENERGY: 9970000  | 3249.9267   | 5340.4633  | 5474.2514   |           |
| 342.6233                | -14447.9400 | -1646.7497 | 0.0000      | 0.0000    |
| 7828.3273               | 6140.9024   | 306.1269   | -1687.4249  | 6204.0301 |
| 307.0164                | 184.3305    | 85.3423    | 511540.4688 | -18.1400  |
| -18.1288                |             |            |             |           |
| [40203]ENERGY: 9980000  | 3256.2339   | 5352.1589  | 5467.4315   |           |
| 304.7646                | -14375.0382 | -1772.4827 | 0.0000      | 0.0000    |
| 7905.3722               | 6138.4402   | 309.1397   | -1766.9320  | 6203.1766 |
| 306.9952                | -309.5442   | -190.1213  | 511540.4688 | -12.8357  |
| -12.8414                |             |            |             |           |
| [40239]ENERGY: 9990000  | 3257.9410   | 5310.6951  | 5461.7967   |           |
| 318.2240                | -14417.0681 | -1706.3648 | 0.0000      | 0.0000    |
| 7913.4669               | 6138.6908   | 309.4562   | -1774.7761  | 6203.4784 |
| 307.2411                | -71.8259    | -205.4141  | 511540.4688 | -12.5390  |
| -12.5418                |             |            |             |           |
| [40292]ENERGY: 10000000 | 3291.0531   | 5334.3926  | 5401.7287   |           |
| 320.4149                | -14481.0015 | -1684.4437 | 0.0000      | 0.0000    |
| 7955.0259               | 6137.1699   | 311.0814   | -1817.8559  | 6203.5289 |
| 307.4629                | -175.2098   | -73.2942   | 511540.4688 | -13.3965  |
| -13.3746                |             |            |             |           |
| [40328]ENERGY: 10010000 | 3242.7823   | 5386.0860  | 5453.8510   |           |
| 303.9347                | -14422.1585 | -1717.4411 | 0.0000      | 0.0000    |
| 7893.6864               | 6140.7407   | 308.6827   | -1752.9457  | 6203.0552 |
| 307.7465                | -23.7022    | 89.4588    | 511540.4688 | -13.2943  |
| -13.3147                |             |            |             |           |

## Supplementary Text 6

|                         |             |            |             |           |
|-------------------------|-------------|------------|-------------|-----------|
| [40378]ENERGY: 10020000 | 3292.3219   | 5332.8653  | 5501.3294   |           |
| 317.2695                | -14390.4632 | -1738.9724 | 0.0000      | 0.0000    |
| 7824.6020               | 6138.9524   | 305.9812   | -1685.6496  | 6202.7879 |
| 307.5971                | -419.8545   | -373.3456  | 511540.4688 | -11.6946  |
| -11.7139                |             |            |             |           |
| [40414]ENERGY: 10030000 | 3231.0893   | 5324.5896  | 5450.1573   |           |
| 342.5051                | -14361.3594 | -1706.2147 | 0.0000      | 0.0000    |
| 7859.9090               | 6140.6761   | 307.3619   | -1719.2329  | 6204.5986 |
| 307.3423                | 32.3841     | 65.3371    | 511540.4688 | -13.4248  |
| -13.4127                |             |            |             |           |
| [40464]ENERGY: 10040000 | 3223.9443   | 5259.1573  | 5436.8012   |           |
| 315.4442                | -14391.3442 | -1580.8124 | 0.0000      | 0.0000    |
| 7882.5192               | 6145.7096   | 308.2460   | -1736.8096  | 6204.4999 |
| 307.4683                | 177.0693    | 147.9133   | 511540.4688 | -15.0240  |
| -15.0267                |             |            |             |           |
| [40500]ENERGY: 10050000 | 3180.8846   | 5291.7553  | 5433.4507   |           |
| 310.4978                | -14408.9639 | -1588.1591 | 0.0000      | 0.0000    |
| 7920.1742               | 6139.6396   | 309.7185   | -1780.5346  | 6205.0537 |
| 307.4785                | 18.5702     | -55.1722   | 511540.4688 | -18.2297  |
| -18.2317                |             |            |             |           |
| [40550]ENERGY: 10060000 | 3240.5322   | 5260.0606  | 5461.2739   |           |
| 330.0755                | -14425.7329 | -1691.2335 | 0.0000      | 0.0000    |
| 7967.9236               | 6142.8993   | 311.5858   | -1825.0243  | 6205.3872 |
| 307.5222                | 30.5594     | -61.0951   | 511540.4688 | -9.8819   |
| -9.8585                 |             |            |             |           |
| [40586]ENERGY: 10070000 | 3283.6482   | 5403.6878  | 5475.6743   |           |
| 337.3823                | -14334.7483 | -1780.5354 | 0.0000      | 0.0000    |
| 7758.2696               | 6143.3785   | 303.3873   | -1614.8911  | 6206.7972 |
| 307.4413                | 88.4471     | 101.8524   | 511540.4688 | -14.2527  |
| -14.2713                |             |            |             |           |
| [40636]ENERGY: 10080000 | 3287.6139   | 5273.9192  | 5486.3939   |           |
| 323.6977                | -14333.0587 | -1727.0696 | 0.0000      | 0.0000    |
| 7830.8473               | 6142.3437   | 306.2254   | -1688.5036  | 6206.5686 |
| 307.6611                | -162.6022   | -202.3219  | 511540.4688 | -15.4696  |
| -15.4537                |             |            |             |           |
| [40672]ENERGY: 10090000 | 3256.6958   | 5449.4829  | 5443.9560   |           |
| 322.3827                | -14418.8455 | -1706.1917 | 0.0000      | 0.0000    |
| 7791.3759               | 6138.8561   | 304.6819   | -1652.5198  | 6206.0329 |
| 307.6478                | 44.9464     | -11.6100   | 511540.4688 | -15.2175  |
| -15.2423                |             |            |             |           |
| [40725]ENERGY: 10100000 | 3321.6468   | 5355.9258  | 5472.1718   |           |
| 338.8660                | -14388.6325 | -1687.3307 | 0.0000      | 0.0000    |
| 7732.5141               | 6145.1613   | 302.3801   | -1587.3528  | 6207.0291 |
| 307.5793                | 152.8001    | 78.2007    | 511540.4688 | -14.7076  |
| -14.7025                |             |            |             |           |
| [40761]ENERGY: 10110000 | 3262.8147   | 5329.4539  | 5523.3869   |           |
| 327.7983                | -14353.0163 | -1785.2968 | 0.0000      | 0.0000    |
| 7840.5831               | 6145.7238   | 306.6061   | -1694.8593  | 6208.2348 |
| 307.7130                | -190.0576   | -91.8330   | 511540.4688 | -17.2999  |
| -17.3130                |             |            |             |           |
| [40811]ENERGY: 10120000 | 3283.2472   | 5415.2550  | 5466.9046   |           |
| 326.4939                | -14406.5092 | -1762.7077 | 0.0000      | 0.0000    |
| 7818.2514               | 6140.9352   | 305.7328   | -1677.3161  | 6207.6794 |
| 307.6202                | -139.4893   | -175.0269  | 511540.4688 | -10.8157  |

## Supplementary Text 6

-10.7796  
[40847]ENERGY: 10130000      3262.2382      5307.6840      5443.8494  
320.1649      -14317.7080      -1742.9957      0.0000      0.0000  
7870.5445      6143.7771      307.7778      -1726.7674      6207.8484  
307.7490      -39.1511      -50.8969      511540.4688      -20.5322  
-20.5480  
[40897]ENERGY: 10140000      3301.9026      5282.3910      5440.8668  
328.0620      -14375.1055      -1713.9029      0.0000      0.0000  
7881.6586      6145.8726      308.2124      -1735.7860      6208.1100  
307.8782      74.0146      93.4552      511540.4688      -13.2344  
-13.2376  
[40933]ENERGY: 10150000      3213.1586      5309.6420      5456.3555  
318.5697      -14323.4739      -1692.1131      0.0000      0.0000  
7862.5164      6144.6552      307.4638      -1717.8612      6208.4522  
307.7878      54.8310      26.2821      511540.4688      -13.4339  
-13.4285  
[40983]ENERGY: 10160000      3178.3824      5428.3340      5513.5307  
323.8414      -14345.0156      -1756.5484      0.0000      0.0000  
7801.8329      6144.3575      305.0908      -1657.4754      6208.3161  
307.8127      191.1526      37.0635      511540.4688      -12.0465  
-12.0564  
[41019]ENERGY: 10170000      3221.3911      5295.3367      5442.2924  
307.6778      -14230.4915      -1799.3267      0.0000      0.0000  
7904.1619      6141.0418      309.0924      -1763.1201      6208.1037  
307.7868      -204.0310      -163.1666      511540.4688      -13.1362  
-13.1117  
[41069]ENERGY: 10180000      3244.4659      5399.4951      5472.1574  
307.9513      -14333.4715      -1789.3857      0.0000      0.0000  
7840.8712      6142.0836      306.6174      -1698.7875      6209.3525  
307.9138      -155.6890      -103.3250      511540.4688      -13.7554  
-13.7657  
[41105]ENERGY: 10190000      3307.4611      5403.3715      5470.7549  
312.5260      -14463.5012      -1702.4888      0.0000      0.0000  
7818.0745      6146.1980      305.7259      -1671.8765      6209.7662  
308.0376      -17.3599      -127.1290      511540.4688      -9.4475  
-9.4662  
[41158]ENERGY: 10200000      3214.9914      5504.1755      5457.5642  
307.1487      -14433.8145      -1695.2347      0.0000      0.0000  
7792.6129      6147.4434      304.7302      -1645.1695      6209.3530  
308.0868      -185.5439      -178.4854      511540.4688      -13.3081  
-13.2855  
[41194]ENERGY: 10210000      3274.5773      5294.6521      5476.8559  
320.1240      -14408.2682      -1683.8174      0.0000      0.0000  
7871.7230      6145.8467      307.8238      -1725.8763      6209.8913  
307.9969      -86.5074      -94.4228      511540.4688      -13.6509  
-13.6562  
[41244]ENERGY: 10220000      3233.7341      5342.2952      5447.0725  
311.5418      -14406.4590      -1712.3924      0.0000      0.0000  
7928.2510      6144.0432      310.0344      -1784.2078      6209.8754  
307.9278      -50.8308      -26.0746      511540.4688      -12.7158  
-12.7027  
[41280]ENERGY: 10230000      3249.5072      5444.6874      5428.5798  
331.6559      -14339.1619      -1742.4094      0.0000      0.0000  
7773.4947      6146.3536      303.9826      -1627.1411      6211.2889

## Supplementary Text 6

|                         |             |            |             |           |
|-------------------------|-------------|------------|-------------|-----------|
| 308.0146                | 83.3172     | 31.2034    | 511540.4688 | -10.9212  |
| -10.9390                |             |            |             |           |
| [41330]ENERGY: 10240000 | 3291.3308   | 5269.7053  | 5463.4749   |           |
| 351.3068                | -14365.1176 | -1747.1466 | 0.0000      | 0.0000    |
| 7884.8556               | 6148.4094   | 308.3374   | -1736.4463  | 6211.9258 |
| 307.9289                | -59.6943    | -33.8577   | 511540.4688 | -15.3952  |
| -15.3933                |             |            |             |           |
| [41366]ENERGY: 10250000 | 3251.4374   | 5401.6357  | 5432.1483   |           |
| 332.2351                | -14434.7449 | -1687.0673 | 0.0000      | 0.0000    |
| 7851.6428               | 6147.2871   | 307.0386   | -1704.3557  | 6211.6131 |
| 307.9700                | -18.1435    | -80.5485   | 511540.4688 | -14.4369  |
| -14.4352                |             |            |             |           |
| [41416]ENERGY: 10260000 | 3279.7006   | 5354.6135  | 5456.4811   |           |
| 319.5933                | -14425.7744 | -1725.6545 | 0.0000      | 0.0000    |
| 7886.0107               | 6144.9703   | 308.3826   | -1741.0404  | 6210.6745 |
| 308.0067                | -91.0827    | -127.7002  | 511540.4688 | -11.7116  |
| -11.7224                |             |            |             |           |
| [41452]ENERGY: 10270000 | 3211.2536   | 5337.1543  | 5465.0458   |           |
| 329.3348                | -14470.2067 | -1677.0362 | 0.0000      | 0.0000    |
| 7948.3346               | 6143.8802   | 310.8197   | -1804.4544  | 6212.2364 |
| 308.0416                | 2.5523      | -20.9409   | 511540.4688 | -12.5149  |
| -12.5124                |             |            |             |           |
| [41502]ENERGY: 10280000 | 3275.8962   | 5383.9943  | 5448.7860   |           |
| 324.2394                | -14432.9702 | -1701.9786 | 0.0000      | 0.0000    |
| 7855.7472               | 6153.7144   | 307.1991   | -1702.0329  | 6214.2862 |
| 308.0790                | -44.5453    | -117.2532  | 511540.4688 | -11.7931  |
| -11.7821                |             |            |             |           |
| [41538]ENERGY: 10290000 | 3298.4013   | 5358.7304  | 5448.0606   |           |
| 306.6417                | -14328.1972 | -1775.7766 | 0.0000      | 0.0000    |
| 7842.9824               | 6150.8426   | 306.6999   | -1692.1398  | 6214.3576 |
| 307.8574                | -158.1134   | -84.8001   | 511540.4688 | -20.5669  |
| -20.5764                |             |            |             |           |
| [41591]ENERGY: 10300000 | 3278.9758   | 5323.3787  | 5491.8766   |           |
| 340.9707                | -14386.2357 | -1690.9705 | 0.0000      | 0.0000    |
| 7794.1531               | 6152.1487   | 304.7905   | -1642.0044  | 6215.0686 |
| 307.9557                | -24.7982    | -45.3930   | 511540.4688 | -14.0998  |
| -14.0809                |             |            |             |           |
| [41627]ENERGY: 10310000 | 3199.0439   | 5336.2345  | 5453.9920   |           |
| 331.0578                | -14320.6782 | -1739.0384 | 0.0000      | 0.0000    |
| 7888.5688               | 6149.1803   | 308.4826   | -1739.3885  | 6215.3738 |
| 308.0222                | 80.1015     | 25.2876    | 511540.4688 | -15.1392  |
| -15.1568                |             |            |             |           |
| [41677]ENERGY: 10320000 | 3284.9116   | 5240.6701  | 5473.2795   |           |
| 296.0001                | -14304.6735 | -1751.3471 | 0.0000      | 0.0000    |
| 7910.6116               | 6149.4522   | 309.3446   | -1761.1594  | 6215.1103 |
| 308.0880                | -255.1813   | -217.4171  | 511540.4688 | -15.4575  |
| -15.4800                |             |            |             |           |
| [41713]ENERGY: 10330000 | 3344.5258   | 5326.8653  | 5445.4453   |           |
| 325.4048                | -14352.6063 | -1770.7158 | 0.0000      | 0.0000    |
| 7834.9486               | 6153.8676   | 306.3858   | -1681.0810  | 6216.2725 |
| 308.3119                | -251.2653   | -243.3860  | 511540.4688 | -14.1666  |
| -14.1509                |             |            |             |           |
| [41763]ENERGY: 10340000 | 3262.0846   | 5332.2817  | 5425.9842   |           |
| 330.5417                | -14443.8160 | -1713.5812 | 0.0000      | 0.0000    |



## Supplementary Text 6

|                         |             |            |             |           |
|-------------------------|-------------|------------|-------------|-----------|
| 7957.0717               | 6150.5667   | 311.1614   | -1806.5050  | 6214.9775 |
| 308.2367                | -22.1245    | 29.9514    | 511540.4688 | -13.0568  |
| -13.0671                |             |            |             |           |
| [41799]ENERGY: 10350000 | 3246.6623   | 5383.5710  | 5462.6279   |           |
| 324.4964                | -14326.3220 | -1759.8434 | 0.0000      | 0.0000    |
| 7824.4451               | 6155.6372   | 305.9750   | -1668.8079  | 6218.3152 |
| 307.9794                | 31.9266     | -91.3946   | 511540.4688 | -14.5930  |
| -14.6016                |             |            |             |           |
| [41849]ENERGY: 10360000 | 3290.6525   | 5353.2084  | 5461.7976   |           |
| 316.6568                | -14354.0319 | -1712.7795 | 0.0000      | 0.0000    |
| 7799.6732               | 6155.1771   | 305.0063   | -1644.4961  | 6217.3815 |
| 308.0055                | 33.9437     | 79.3182    | 511540.4688 | -15.2491  |
| -15.2382                |             |            |             |           |
| [41885]ENERGY: 10370000 | 3292.8285   | 5313.7497  | 5479.0234   |           |
| 343.2606                | -14409.2075 | -1723.9695 | 0.0000      | 0.0000    |
| 7857.2279               | 6152.9131   | 307.2570   | -1704.3148  | 6215.0850 |
| 308.0975                | -73.0143    | -56.8639   | 511540.4688 | -13.9880  |
| -13.9538                |             |            |             |           |
| [41935]ENERGY: 10380000 | 3297.1099   | 5304.5988  | 5437.7629   |           |
| 339.0388                | -14397.3912 | -1734.3901 | 0.0000      | 0.0000    |
| 7905.4170               | 6152.1462   | 309.1415   | -1753.2708  | 6216.1304 |
| 308.1973                | 46.5758     | -37.8568   | 511540.4688 | -15.5831  |
| -15.6085                |             |            |             |           |
| [41971]ENERGY: 10390000 | 3281.9616   | 5298.9226  | 5500.1234   |           |
| 322.1436                | -14405.8031 | -1723.4377 | 0.0000      | 0.0000    |
| 7875.3273               | 6149.2377   | 307.9648   | -1726.0896  | 6215.8147 |
| 308.1298                | 3.5124      | -51.6278   | 511540.4688 | -13.0282  |
| -13.0115                |             |            |             |           |
| [42024]ENERGY: 10400000 | 3320.9553   | 5282.7986  | 5439.2451   |           |
| 315.9814                | -14410.9116 | -1666.7843 | 0.0000      | 0.0000    |
| 7868.7249               | 6150.0094   | 307.7066   | -1718.7155  | 6215.2788 |
| 307.8801                | 30.5049     | -27.4410   | 511540.4688 | -15.5841  |
| -15.6017                |             |            |             |           |
| [42060]ENERGY: 10410000 | 3239.5013   | 5454.4112  | 5448.3394   |           |
| 310.5255                | -14402.1323 | -1681.7671 | 0.0000      | 0.0000    |
| 7786.2612               | 6155.1392   | 304.4819   | -1631.1220  | 6217.5181 |
| 308.0529                | 25.0484     | 80.0426    | 511540.4688 | -14.5043  |
| -14.5059                |             |            |             |           |
| [42110]ENERGY: 10420000 | 3270.9212   | 5403.6476  | 5438.5861   |           |
| 294.9044                | -14419.8818 | -1706.9866 | 0.0000      | 0.0000    |
| 7873.1000               | 6154.2908   | 307.8777   | -1718.8091  | 6217.2558 |
| 308.1642                | -94.6387    | -164.1744  | 511540.4688 | -16.0153  |
| -16.0122                |             |            |             |           |
| [42146]ENERGY: 10430000 | 3222.5291   | 5285.7385  | 5460.6087   |           |
| 335.1573                | -14358.8684 | -1720.2899 | 0.0000      | 0.0000    |
| 7927.5025               | 6152.3779   | 310.0051   | -1775.1246  | 6218.2565 |
| 308.0100                | 155.2186    | 114.4652   | 511540.4688 | -13.9624  |
| -13.9397                |             |            |             |           |
| [42196]ENERGY: 10440000 | 3323.9923   | 5353.5799  | 5459.8918   |           |
| 326.1325                | -14457.2690 | -1710.9019 | 0.0000      | 0.0000    |
| 7860.0342               | 6155.4598   | 307.3668   | -1704.5743  | 6217.7259 |
| 307.9596                | -107.2666   | -56.8857   | 511540.4688 | -15.4031  |
| -15.4062                |             |            |             |           |
| [42232]ENERGY: 10450000 | 3304.8418   | 5261.3579  | 5455.1059   |           |

## Supplementary Text 6

|                         |             |            |             |           |
|-------------------------|-------------|------------|-------------|-----------|
| 331.6628                | -14352.8317 | -1706.6557 | 0.0000      | 0.0000    |
| 7861.1961               | 6154.6771   | 307.4122   | -1706.5190  | 6217.3879 |
| 307.8440                | -255.2227   | -198.8429  | 511540.4688 | -11.9010  |
| -11.9087                |             |            |             |           |
| [42282]ENERGY: 10460000 | 3235.5502   | 5383.3565  | 5532.7798   |           |
| 337.9860                | -14427.6429 | -1752.5077 | 0.0000      | 0.0000    |
| 7847.0627               | 6156.5846   | 306.8595   | -1690.4781  | 6218.6028 |
| 307.9322                | 310.0440    | 150.6363   | 511540.4688 | -15.7847  |
| -15.7988                |             |            |             |           |
| [42318]ENERGY: 10470000 | 3223.6398   | 5366.2349  | 5451.7380   |           |
| 310.2803                | -14369.2219 | -1717.6623 | 0.0000      | 0.0000    |
| 7888.2832               | 6153.2919   | 308.4714   | -1734.9913  | 6217.9010 |
| 308.0314                | 114.1981    | 78.6926    | 511540.4688 | -12.2202  |
| -12.2198                |             |            |             |           |
| [42368]ENERGY: 10480000 | 3331.5420   | 5342.3308  | 5382.2502   |           |
| 317.0873                | -14393.2329 | -1716.5595 | 0.0000      | 0.0000    |
| 7889.2646               | 6152.6826   | 308.5098   | -1736.5820  | 6217.5216 |
| 307.8775                | -288.3625   | -213.9520  | 511540.4688 | -14.1276  |
| -14.1046                |             |            |             |           |
| [42404]ENERGY: 10490000 | 3268.5857   | 5337.2390  | 5489.7950   |           |
| 307.2707                | -14415.6320 | -1708.8497 | 0.0000      | 0.0000    |
| 7875.2852               | 6153.6939   | 307.9631   | -1721.5913  | 6216.8116 |
| 307.9822                | 58.2037     | -21.8217   | 511540.4688 | -15.2827  |
| -15.2836                |             |            |             |           |
| [42457]ENERGY: 10500000 | 3173.6428   | 5352.6436  | 5470.7327   |           |
| 324.3003                | -14366.8685 | -1651.0481 | 0.0000      | 0.0000    |
| 7849.1111               | 6152.5139   | 306.9396   | -1696.5972  | 6216.2185 |
| 308.0354                | 305.8322    | 215.2341   | 511540.4688 | -16.5634  |
| -16.5626                |             |            |             |           |
| [42493]ENERGY: 10510000 | 3220.5353   | 5389.6778  | 5480.4798   |           |
| 335.0806                | -14409.0794 | -1695.0215 | 0.0000      | 0.0000    |
| 7831.1431               | 6152.8157   | 306.2370   | -1678.3275  | 6216.2117 |
| 307.9319                | 66.0146     | 14.9274    | 511540.4688 | -12.7675  |
| -12.7877                |             |            |             |           |
| [42543]ENERGY: 10520000 | 3224.8439   | 5302.6955  | 5461.9057   |           |
| 294.8941                | -14327.7262 | -1674.6048 | 0.0000      | 0.0000    |
| 7868.3592               | 6150.3674   | 307.6923   | -1717.9918  | 6214.9832 |
| 307.8353                | -28.8261    | -87.1134   | 511540.4688 | -17.3039  |
| -17.3061                |             |            |             |           |
| [42579]ENERGY: 10530000 | 3296.9075   | 5339.5879  | 5478.9524   |           |
| 339.4420                | -14354.9594 | -1742.9752 | 0.0000      | 0.0000    |
| 7797.7032               | 6154.6584   | 304.9293   | -1643.0449  | 6214.7990 |
| 307.8556                | -84.5518    | -233.0852  | 511540.4688 | -16.0135  |
| -16.0180                |             |            |             |           |
| [42629]ENERGY: 10540000 | 3261.7898   | 5313.3200  | 5503.3762   |           |
| 342.7664                | -14350.7872 | -1735.1423 | 0.0000      | 0.0000    |
| 7819.7064               | 6155.0293   | 305.7897   | -1664.6771  | 6215.9073 |
| 307.7178                | 13.8262     | 105.4283   | 511540.4688 | -18.8687  |
| -18.8641                |             |            |             |           |
| [42665]ENERGY: 10550000 | 3247.6409   | 5348.1472  | 5460.8734   |           |
| 309.6413                | -14369.0209 | -1673.3061 | 0.0000      | 0.0000    |
| 7827.1079               | 6151.0838   | 306.0792   | -1676.0241  | 6214.6654 |
| 308.0736                | -31.5759    | -32.1713   | 511540.4688 | -11.7900  |
| -11.7858                |             |            |             |           |

## Supplementary Text 6

|                         |             |            |             |
|-------------------------|-------------|------------|-------------|
| [42715]ENERGY: 10560000 | 3267.9561   | 5269.7104  | 5417.8392   |
| 332.7591                | -14345.1107 | -1752.4442 | 0.0000      |
| 7963.8003               | 6154.5102   | 311.4245   | -1809.2900  |
| 307.9891                | 99.6892     | 3.8447     | 511540.4688 |
| -16.8672                |             |            | -16.8857    |
| [42751]ENERGY: 10570000 | 3258.8474   | 5330.9776  | 5452.5198   |
| 299.1411                | -14394.9953 | -1720.6735 | 0.0000      |
| 7924.7615               | 6150.5787   | 309.8979   | -1774.1828  |
| 308.0659                | -62.9977    | -13.2875   | 511540.4688 |
| -16.3972                |             |            | -16.3943    |
| [42801]ENERGY: 10580000 | 3280.7965   | 5295.5214  | 5419.3932   |
| 333.3827                | -14448.3163 | -1669.4472 | 0.0000      |
| 7940.3453               | 6151.6755   | 310.5073   | -1788.6697  |
| 308.0193                | 258.0559    | 258.4885   | 511540.4688 |
| -16.1905                |             |            | -16.1714    |
| [42837]ENERGY: 10590000 | 3298.9195   | 5344.9418  | 5394.7165   |
| 342.9838                | -14277.1599 | -1761.7360 | 0.0000      |
| 7812.4545               | 6155.1202   | 305.5062   | -1657.3343  |
| 307.9726                | -183.3165   | -213.0445  | 511540.4688 |
| -16.4560                |             |            | -16.4571    |
| [42890]ENERGY: 10600000 | 3268.8826   | 5349.0437  | 5426.5781   |
| 333.5354                | -14398.3777 | -1675.9823 | 0.0000      |
| 7848.9047               | 6152.5846   | 306.9315   | -1696.3201  |
| 307.9292                | 113.3081    | 147.4974   | 511540.4688 |
| -16.0094                |             |            | -16.0203    |
| [42926]ENERGY: 10610000 | 3289.0189   | 5220.4833  | 5482.5115   |
| 322.7130                | -14319.5271 | -1712.6880 | 0.0000      |
| 7873.1709               | 6155.6825   | 307.8805   | -1717.4884  |
| 307.9343                | 28.8508     | -6.7775    | 511540.4688 |
| -15.2366                |             |            | -15.2189    |
| [42976]ENERGY: 10620000 | 3153.6309   | 5276.7019  | 5437.7841   |
| 334.2061                | -14309.2117 | -1659.5424 | 0.0000      |
| 7919.5596               | 6153.1284   | 309.6945   | -1766.4312  |
| 308.0892                | 265.7694    | 134.5569   | 511540.4688 |
| -14.9364                |             |            | -14.9553    |
| [43012]ENERGY: 10630000 | 3204.2394   | 5288.9925  | 5448.2357   |
| 328.7116                | -14370.4779 | -1688.2353 | 0.0000      |
| 7943.3004               | 6154.7664   | 310.6229   | -1788.5340  |
| 307.9566                | 172.4365    | 104.6356   | 511540.4688 |
| -13.7729                |             |            | -13.7563    |
| [43062]ENERGY: 10640000 | 3202.4354   | 5409.1379  | 5404.2583   |
| 315.7186                | -14347.1942 | -1676.6001 | 0.0000      |
| 7847.1359               | 6154.8918   | 306.8624   | -1692.2441  |
| 308.0852                | 292.4253    | 220.5339   | 511540.4688 |
| -15.9015                |             |            | -15.9020    |
| [43098]ENERGY: 10650000 | 3243.1666   | 5343.6514  | 5426.5745   |
| 329.7465                | -14395.1069 | -1673.8051 | 0.0000      |
| 7881.7385               | 6155.9654   | 308.2155   | -1725.7730  |
| 308.0445                | 198.0429    | 153.6244   | 511540.4688 |
| -16.1089                |             |            | -16.1229    |
| [43148]ENERGY: 10660000 | 3252.9459   | 5412.9843  | 5474.3859   |
| 322.5881                | -14405.6810 | -1717.5071 | 0.0000      |
| 7815.0570               | 6154.7730   | 305.6079   | -1660.2840  |
| 308.1379                | -104.9451   | -182.5242  | 511540.4688 |
|                         |             |            | -14.9139    |

Supplementary Text 6

-14.9217  
 [43184]ENERGY: 10670000      3353.8959      5247.2749      5412.2339  
 299.7346      -14251.0875      -1786.6514      0.0000      0.0000  
 7880.6902      6156.0906      308.1745      -1724.5996      6220.1775  
 308.1293      -91.8326      -42.7378      511540.4688      -14.5735  
 -14.5744  
 [43234]ENERGY: 10680000      3252.8588      5289.4044      5402.3051  
 315.7891      -14275.3284      -1730.0313      0.0000      0.0000  
 7900.5612      6155.5589      308.9516      -1745.0023      6218.8763  
 308.1419      134.3302      7.7408      511540.4688      -17.5567  
 -17.5456  
 [43270]ENERGY: 10690000      3236.3298      5349.2816      5434.6031  
 313.5202      -14356.1520      -1749.3504      0.0000      0.0000  
 7927.7688      6156.0010      310.0155      -1771.7677      6219.8617  
 308.0812      146.1047      36.9159      511540.4688      -10.1255  
 -10.1474  
 [43323]ENERGY: 10700000      3242.2289      5366.3343      5449.7759  
 322.2697      -14441.9054      -1710.3720      0.0000      0.0000  
 7925.3341      6153.6656      309.9203      -1771.6685      6220.0175  
 308.2065      174.8943      13.6156      511540.4688      -15.5065  
 -15.4773  
 [43359]ENERGY: 10710000      3305.5845      5278.8415      5514.6484  
 309.7817      -14341.6836      -1774.8079      0.0000      0.0000  
 7863.5461      6155.9108      307.5041      -1707.6353      6219.2788  
 308.1982      -228.7269      -284.3541      511540.4688      -22.3267  
 -22.3556  
 [43409]ENERGY: 10720000      3271.7766      5379.4429      5452.0897  
 319.2707      -14327.8173      -1763.3477      0.0000      0.0000  
 7825.1927      6156.6077      306.0043      -1668.5850      6220.5147  
 308.2562      -60.4807      -41.2294      511540.4688      -11.9714  
 -11.9711  
 [43445]ENERGY: 10730000      3325.1268      5331.0385      5412.1498  
 331.4267      -14391.7598      -1705.2658      0.0000      0.0000  
 7856.9742      6159.6905      307.2471      -1697.2837      6220.2039  
 308.2841      -118.3314      -116.8968      511540.4688      -15.5046  
 -15.4938  
 [43495]ENERGY: 10740000      3319.1789      5262.4296      5512.7453  
 332.6225      -14467.5779      -1694.8747      0.0000      0.0000  
 7892.1585      6156.6821      308.6230      -1735.4764      6220.2198  
 308.2571      211.8481      229.1036      511540.4688      -15.4114  
 -15.3944  
 [43531]ENERGY: 10750000      3282.9241      5381.0768      5435.7420  
 323.4271      -14392.0053      -1699.4824      0.0000      0.0000  
 7826.7161      6158.3985      306.0639      -1668.3176      6220.3045  
 308.3169      58.3549      -8.6986      511540.4688      -16.2473  
 -16.2598  
 [43581]ENERGY: 10760000      3157.1088      5353.4055      5469.9386  
 305.0474      -14368.0336      -1727.5235      0.0000      0.0000  
 7964.4397      6154.3829      311.4495      -1810.0569      6219.9245  
 308.4097      47.8965      18.8745      511540.4688      -16.5172  
 -16.5123  
 [43617]ENERGY: 10770000      3250.1902      5361.3378      5474.7736  
 331.3980      -14434.0334      -1689.2661      0.0000      0.0000  
 7863.0309      6157.4310      307.4839      -1705.5999      6220.6856

## Supplementary Text 6

|                         |             |            |             |           |
|-------------------------|-------------|------------|-------------|-----------|
| 308.4174                | -177.7605   | -163.5046  | 511540.4688 | -14.8304  |
| -14.8320                |             |            |             |           |
| [43667]ENERGY: 10780000 | 3300.2447   | 5346.6233  | 5495.3760   |           |
| 330.0337                | -14489.9730 | -1698.8093 | 0.0000      | 0.0000    |
| 7873.1625               | 6156.6577   | 307.8801   | -1716.5047  | 6220.3170 |
| 308.3448                | -94.0523    | -105.4148  | 511540.4688 | -13.9035  |
| -13.9030                |             |            |             |           |
| [43703]ENERGY: 10790000 | 3264.6523   | 5344.7771  | 5441.9540   |           |
| 325.3112                | -14391.1862 | -1692.3174 | 0.0000      | 0.0000    |
| 7864.2352               | 6157.4262   | 307.5310   | -1706.8090  | 6220.3514 |
| 308.4118                | 99.9210     | 51.4105    | 511540.4688 | -17.0230  |
| -17.0129                |             |            |             |           |
| [43756]ENERGY: 10800000 | 3260.6842   | 5191.8201  | 5462.6117   |           |
| 303.0404                | -14306.3855 | -1672.1584 | 0.0000      | 0.0000    |
| 7919.4670               | 6159.0795   | 309.6909   | -1760.3875  | 6220.4836 |
| 308.2212                | -34.3096    | -138.8264  | 511540.4688 | -17.0411  |
| -17.0573                |             |            |             |           |
| [43792]ENERGY: 10810000 | 3230.6930   | 5351.7201  | 5454.3551   |           |
| 319.5896                | -14388.0969 | -1632.3203 | 0.0000      | 0.0000    |
| 7824.3319               | 6160.2725   | 305.9706   | -1664.0595  | 6220.9964 |
| 308.2421                | -27.6697    | -57.7780   | 511540.4688 | -15.2553  |
| -15.2574                |             |            |             |           |
| [43842]ENERGY: 10820000 | 3289.2866   | 5260.8809  | 5461.3921   |           |
| 334.1423                | -14348.5746 | -1669.4308 | 0.0000      | 0.0000    |
| 7831.4815               | 6159.1780   | 306.2502   | -1672.3036  | 6221.6414 |
| 308.2698                | -95.9529    | -86.5034   | 511540.4688 | -15.4912  |
| -15.5040                |             |            |             |           |
| [43878]ENERGY: 10830000 | 3299.3419   | 5334.5365  | 5473.1754   |           |
| 335.9656                | -14401.9408 | -1715.5708 | 0.0000      | 0.0000    |
| 7833.8918               | 6159.3996   | 306.3445   | -1674.4923  | 6221.0987 |
| 308.3614                | 18.8702     | -74.0954   | 511540.4688 | -18.8827  |
| -18.8862                |             |            |             |           |
| [43928]ENERGY: 10840000 | 3352.6117   | 5333.0409  | 5399.5133   |           |
| 312.0108                | -14408.9712 | -1751.3719 | 0.0000      | 0.0000    |
| 7922.0836               | 6158.9173   | 309.7932   | -1763.1663  | 6222.0132 |
| 308.3728                | 123.8822    | 58.9494    | 511540.4688 | -11.9272  |
| -11.9290                |             |            |             |           |
| [43964]ENERGY: 10850000 | 3208.2984   | 5366.7956  | 5491.4014   |           |
| 313.5538                | -14397.6919 | -1705.7724 | 0.0000      | 0.0000    |
| 7881.5532               | 6158.1382   | 308.2083   | -1723.4150  | 6221.9271 |
| 308.1665                | 52.4350     | 25.5482    | 511540.4688 | -14.3302  |
| -14.3229                |             |            |             |           |
| [44014]ENERGY: 10860000 | 3308.8027   | 5309.3886  | 5466.1023   |           |
| 299.3083                | -14461.1757 | -1710.0154 | 0.0000      | 0.0000    |
| 7946.4154               | 6158.8261   | 310.7447   | -1787.5893  | 6221.9834 |
| 308.1502                | -178.6270   | -134.2023  | 511540.4688 | -14.6152  |
| -14.5937                |             |            |             |           |
| [44050]ENERGY: 10870000 | 3310.5192   | 5279.1007  | 5448.4326   |           |
| 318.6282                | -14393.7689 | -1686.8024 | 0.0000      | 0.0000    |
| 7885.9536               | 6162.0631   | 308.3803   | -1723.8905  | 6223.0885 |
| 308.2007                | -10.6967    | -24.1551   | 511540.4688 | -13.8051  |
| -13.8133                |             |            |             |           |
| [44100]ENERGY: 10880000 | 3302.4946   | 5384.2245  | 5456.8714   |           |
| 343.9262                | -14451.4287 | -1705.8312 | 0.0000      | 0.0000    |

## Supplementary Text 6

|                         |             |            |             |           |
|-------------------------|-------------|------------|-------------|-----------|
| 7829.5060               | 6159.7628   | 306.1730   | -1669.7432  | 6222.0708 |
| 308.1007                | 54.6893     | 42.3457    | 511540.4688 | -16.7323  |
| -16.7256                |             |            |             |           |
| [44136]ENERGY: 10890000 | 3248.6259   | 5352.7297  | 5431.5660   |           |
| 305.3852                | -14416.7183 | -1721.9977 | 0.0000      | 0.0000    |
| 7958.7281               | 6158.3189   | 311.2262   | -1800.4092  | 6222.9957 |
| 308.2183                | -127.6622   | -71.6280   | 511540.4688 | -15.2320  |
| -15.2402                |             |            |             |           |
| [44189]ENERGY: 10900000 | 3283.2408   | 5309.2677  | 5424.8886   |           |
| 319.1603                | -14362.8708 | -1727.7888 | 0.0000      | 0.0000    |
| 7913.7675               | 6159.6651   | 309.4680   | -1754.1023  | 6223.4390 |
| 308.4378                | -118.5118   | -188.5428  | 511540.4688 | -14.4828  |
| -14.4706                |             |            |             |           |
| [44225]ENERGY: 10910000 | 3201.7715   | 5412.8143  | 5445.3949   |           |
| 312.6818                | -14516.2371 | -1646.1362 | 0.0000      | 0.0000    |
| 7947.3475               | 6157.6367   | 310.7811   | -1789.7108  | 6223.6994 |
| 308.2633                | 66.8570     | 31.6442    | 511540.4688 | -14.4592  |
| -14.4746                |             |            |             |           |
| [44275]ENERGY: 10920000 | 3291.6612   | 5275.5629  | 5477.9305   |           |
| 331.6051                | -14412.2619 | -1743.5571 | 0.0000      | 0.0000    |
| 7937.6755               | 6158.6163   | 310.4029   | -1779.0592  | 6224.1279 |
| 308.2291                | 116.7002    | 10.2402    | 511540.4688 | -16.7277  |
| -16.7070                |             |            |             |           |
| [44311]ENERGY: 10930000 | 3188.7472   | 5334.0705  | 5485.0975   |           |
| 327.1586                | -14311.0831 | -1731.9167 | 0.0000      | 0.0000    |
| 7869.7974               | 6161.8714   | 307.7485   | -1707.9260  | 6224.3064 |
| 308.2600                | 190.8601    | 145.8439   | 511540.4688 | -13.4871  |
| -13.4934                |             |            |             |           |
| [44361]ENERGY: 10940000 | 3289.2718   | 5331.0957  | 5461.2427   |           |
| 311.6920                | -14385.8762 | -1725.7651 | 0.0000      | 0.0000    |
| 7880.4601               | 6162.1209   | 308.1655   | -1718.3392  | 6225.8892 |
| 308.5124                | -211.5557   | -66.0049   | 511540.4688 | -13.5984  |
| -13.5971                |             |            |             |           |
| [44397]ENERGY: 10950000 | 3263.0739   | 5386.3029  | 5432.9191   |           |
| 317.2701                | -14344.4113 | -1753.7397 | 0.0000      | 0.0000    |
| 7860.3956               | 6161.8106   | 307.3809   | -1698.5850  | 6225.6969 |
| 308.5162                | 57.8104     | -21.2568   | 511540.4688 | -16.7434  |
| -16.7442                |             |            |             |           |
| [44447]ENERGY: 10960000 | 3204.3548   | 5378.7732  | 5479.9874   |           |
| 304.7901                | -14262.9401 | -1769.4022 | 0.0000      | 0.0000    |
| 7829.8762               | 6165.4394   | 306.1874   | -1664.4368  | 6226.6773 |
| 308.3942                | 185.5733    | 5.2523     | 511540.4688 | -15.8728  |
| -15.8932                |             |            |             |           |
| [44483]ENERGY: 10970000 | 3215.2930   | 5309.0644  | 5486.9073   |           |
| 328.7931                | -14389.0928 | -1765.7410 | 0.0000      | 0.0000    |
| 7970.9889               | 6156.2129   | 311.7056   | -1814.7760  | 6225.8882 |
| 308.4103                | 219.0224    | 127.0493   | 511540.4688 | -15.7289  |
| -15.7180                |             |            |             |           |
| [44533]ENERGY: 10980000 | 3306.5929   | 5412.2298  | 5425.8823   |           |
| 318.6167                | -14409.1077 | -1769.0758 | 0.0000      | 0.0000    |
| 7875.1993               | 6160.3373   | 307.9598   | -1714.8620  | 6226.0703 |
| 308.4412                | -57.9536    | -136.3472  | 511540.4688 | -12.9599  |
| -12.9725                |             |            |             |           |
| [44569]ENERGY: 10990000 | 3198.0773   | 5398.2162  | 5489.1174   |           |

## Supplementary Text 6

|                         |             |            |             |           |
|-------------------------|-------------|------------|-------------|-----------|
| 325.9869                | -14422.0445 | -1723.3449 | 0.0000      | 0.0000    |
| 7897.0992               | 6163.1077   | 308.8162   | -1733.9915  | 6226.5902 |
| 308.5305                | 89.1492     | 41.2023    | 511540.4688 | -16.5385  |
| -16.5292                |             |            |             |           |
| [44622]ENERGY: 11000000 | 3277.3743   | 5343.4959  | 5416.0465   |           |
| 326.7226                | -14327.9902 | -1795.1666 | 0.0000      | 0.0000    |
| 7924.7994               | 6165.2818   | 309.8994   | -1759.5176  | 6226.4324 |
| 308.4407                | 66.6178     | 19.2754    | 511540.4688 | -20.2341  |
| -20.2372                |             |            |             |           |
| [268]ENERGY: 11010000   | 3249.1400   | 5331.7286  | 5448.6366   |           |
| 332.8110                | -14358.8280 | -1716.7647 | 0.0000      | 0.0000    |
| 7876.1513               | 6162.8749   | 307.9970   | -1713.2764  | 6226.5272 |
| 308.4357                | -24.0556    | -22.5812   | 511540.4688 | -13.3994  |
| -13.3997                |             |            |             |           |
| [307]ENERGY: 11020000   | 3258.6197   | 5342.5401  | 5456.3713   |           |
| 334.2784                | -14396.0908 | -1705.1842 | 0.0000      | 0.0000    |
| 7873.7815               | 6164.3159   | 307.9043   | -1709.4656  | 6225.5669 |
| 308.4174                | 88.9598     | 108.5173   | 511540.4688 | -15.9513  |
| -15.9421                |             |            |             |           |
| [359]ENERGY: 11030000   | 3251.7775   | 5359.5856  | 5460.2914   |           |
| 300.6926                | -14437.3193 | -1697.2369 | 0.0000      | 0.0000    |
| 7926.2126               | 6164.0035   | 309.9547   | -1762.2091  | 6227.1145 |
| 308.2601                | -11.5122    | -34.1313   | 511540.4688 | -20.5427  |
| -20.5588                |             |            |             |           |
| [397]ENERGY: 11040000   | 3291.7795   | 5353.4501  | 5455.0129   |           |
| 329.0559                | -14473.7127 | -1660.6686 | 0.0000      | 0.0000    |
| 7865.9131               | 6160.8303   | 307.5967   | -1705.0829  | 6225.5678 |
| 308.2739                | 143.7704    | 182.7055   | 511540.4688 | -18.0119  |
| -18.0129                |             |            |             |           |
| [449]ENERGY: 11050000   | 3243.2609   | 5360.1763  | 5435.1948   |           |
| 315.8221                | -14342.7871 | -1759.6009 | 0.0000      | 0.0000    |
| 7909.3841               | 6161.4502   | 309.2966   | -1747.9339  | 6226.1999 |
| 308.4004                | 54.9039     | 84.4520    | 511540.4688 | -18.4357  |
| -18.4045                |             |            |             |           |
| [487]ENERGY: 11060000   | 3340.6738   | 5290.9771  | 5381.2740   |           |
| 311.5701                | -14316.9374 | -1800.5117 | 0.0000      | 0.0000    |
| 7954.9063               | 6161.9522   | 311.0767   | -1792.9541  | 6225.5743 |
| 308.5833                | -397.3912   | -252.2644  | 511540.4688 | -10.9434  |
| -10.9320                |             |            |             |           |
| [538]ENERGY: 11070000   | 3237.8276   | 5373.5960  | 5443.0012   |           |
| 331.2168                | -14358.9634 | -1743.5798 | 0.0000      | 0.0000    |
| 7882.5698               | 6165.6682   | 308.2480   | -1716.9016  | 6226.9988 |
| 308.3582                | 197.5438    | 116.4608   | 511540.4688 | -17.2271  |
| -17.2700                |             |            |             |           |
| [575]ENERGY: 11080000   | 3306.9764   | 5312.4558  | 5419.6285   |           |
| 339.9862                | -14363.0770 | -1680.5626 | 0.0000      | 0.0000    |
| 7833.8182               | 6169.2255   | 306.3416   | -1664.5928  | 6227.4137 |
| 308.4137                | 101.5456    | 148.6654   | 511540.4688 | -14.0087  |
| -13.9775                |             |            |             |           |
| [626]ENERGY: 11090000   | 3254.9603   | 5392.0187  | 5418.8855   |           |
| 357.0776                | -14404.7019 | -1749.3609 | 0.0000      | 0.0000    |
| 7894.2634               | 6163.1428   | 308.7053   | -1731.1206  | 6227.1860 |
| 308.4192                | 234.4900    | 180.0654   | 511540.4688 | -16.7801  |
| -16.8049                |             |            |             |           |

## Supplementary Text 6

|                        |             |            |             |           |
|------------------------|-------------|------------|-------------|-----------|
| [666]ENERGY: 11100000  | 3282.7263   | 5308.7767  | 5471.5876   |           |
| 354.3714               | -14313.1980 | -1785.5748 | 0.0000      | 0.0000    |
| 7845.8965              | 6164.5858   | 306.8139   | -1681.3107  | 6226.7603 |
| 308.3743               | -143.1947   | -265.2030  | 511540.4688 | -15.5219  |
| -15.5032               |             |            |             |           |
| [717]ENERGY: 11110000  | 3236.1701   | 5300.0284  | 5455.9927   |           |
| 316.7941               | -14405.7430 | -1729.7427 | 0.0000      | 0.0000    |
| 7985.3935              | 6158.8932   | 312.2689   | -1826.5003  | 6225.4336 |
| 308.3709               | 0.1709      | -102.1721  | 511540.4688 | -17.7989  |
| -17.8129               |             |            |             |           |
| [753]ENERGY: 11120000  | 3211.1288   | 5293.1053  | 5457.4905   |           |
| 346.5104               | -14223.2619 | -1718.2877 | 0.0000      | 0.0000    |
| 7798.0754              | 6164.7607   | 304.9439   | -1633.3147  | 6225.3908 |
| 308.3951               | 170.8905    | 154.5131   | 511540.4688 | -13.4747  |
| -13.4530               |             |            |             |           |
| [803]ENERGY: 11130000  | 3333.5539   | 5356.2936  | 5478.1910   |           |
| 315.1471               | -14413.0347 | -1735.0279 | 0.0000      | 0.0000    |
| 7828.9816              | 6164.1047   | 306.1524   | -1664.8769  | 6226.9765 |
| 308.5886               | -56.8652    | -100.0888  | 511540.4688 | -16.1244  |
| -16.1616               |             |            |             |           |
| [839]ENERGY: 11140000  | 3232.5619   | 5281.4038  | 5453.9236   |           |
| 327.8073               | -14330.2307 | -1750.4332 | 0.0000      | 0.0000    |
| 7947.3406              | 6162.3735   | 310.7809   | -1784.9672  | 6226.2356 |
| 308.6025               | 76.7919     | 58.8559    | 511540.4688 | -14.6452  |
| -14.6320               |             |            |             |           |
| [889]ENERGY: 11150000  | 3245.0386   | 5242.3351  | 5438.1613   |           |
| 340.6538               | -14231.2398 | -1754.6023 | 0.0000      | 0.0000    |
| 7881.3510              | 6161.6978   | 308.2004   | -1719.6532  | 6225.5489 |
| 308.3432               | -116.7788   | -174.5995  | 511540.4688 | -12.9172  |
| -12.9103               |             |            |             |           |
| [925]ENERGY: 11160000  | 3282.2801   | 5362.8756  | 5460.6627   |           |
| 327.8390               | -14464.5003 | -1702.7218 | 0.0000      | 0.0000    |
| 7897.2596              | 6163.6949   | 308.8225   | -1733.5647  | 6226.3429 |
| 308.5492               | -93.9929    | -15.8546   | 511540.4688 | -20.0483  |
| -20.0372               |             |            |             |           |
| [975]ENERGY: 11170000  | 3248.9927   | 5266.2809  | 5438.2874   |           |
| 341.0713               | -14290.9510 | -1725.2980 | 0.0000      | 0.0000    |
| 7886.8970              | 6165.2803   | 308.4172   | -1721.6167  | 6226.2798 |
| 308.6812               | 152.0896    | -12.6789   | 511540.4688 | -10.5082  |
| -10.4943               |             |            |             |           |
| [1011]ENERGY: 11180000 | 3257.7062   | 5328.6904  | 5505.9111   |           |
| 328.3507               | -14362.4882 | -1737.9260 | 0.0000      | 0.0000    |
| 7845.8761              | 6166.1203   | 306.8131   | -1679.7558  | 6226.8384 |
| 308.7039               | -36.2437    | -171.7911  | 511540.4688 | -18.6122  |
| -18.6467               |             |            |             |           |
| [1061]ENERGY: 11190000 | 3280.6911   | 5442.8487  | 5468.7745   |           |
| 312.0999               | -14485.9792 | -1740.6650 | 0.0000      | 0.0000    |
| 7885.0370              | 6162.8071   | 308.3445   | -1722.2299  | 6226.7000 |
| 308.6219               | 176.9733    | 49.0152    | 511540.4688 | -14.0933  |
| -14.1075               |             |            |             |           |
| [1100]ENERGY: 11200000 | 3253.3252   | 5397.6845  | 5431.2068   |           |
| 306.5942               | -14375.2735 | -1769.1719 | 0.0000      | 0.0000    |
| 7921.0273              | 6165.3925   | 309.7519   | -1755.6347  | 6227.0699 |
| 308.6381               | -156.8775   | -31.1324   | 511540.4688 | -14.4980  |



Supplementary Text 6

-14.4627  
 [1150]ENERGY: 11210000      3283.8421      5323.1849      5450.5674  
 314.0403      -14363.4291      -1652.5110      0.0000      0.0000  
 7809.1440      6164.8387      305.3767      -1644.3053      6225.7417  
 308.5662      216.8679      153.5203      511540.4688      -16.3380  
 -16.3587  
 [1186]ENERGY: 11220000      3289.4411      5336.0203      5421.3013  
 300.7201      -14228.9211      -1767.1205      0.0000      0.0000  
 7814.9885      6166.4297      305.6052      -1648.5587      6226.9813  
 308.5869      -17.1564      -44.4025      511540.4688      -15.6077  
 -15.5907  
 [1236]ENERGY: 11230000      3307.5731      5490.9508      5410.5652  
 326.6778      -14385.5384      -1813.4528      0.0000      0.0000  
 7826.5207      6163.2965      306.0562      -1663.2242      6226.3792  
 308.5334      -98.6058      -92.0933      511540.4688      -18.5682  
 -18.5709  
 [1272]ENERGY: 11240000      3242.0212      5298.3999      5437.0329  
 328.6584      -14405.9022      -1727.1276      0.0000      0.0000  
 7987.3809      6160.4636      312.3467      -1826.9173      6227.1161  
 308.5825      36.9001      -1.5926      511540.4688      -15.8891  
 -15.9133  
 [1322]ENERGY: 11250000      3288.3917      5305.1640      5473.0028  
 326.9545      -14360.4322      -1729.2971      0.0000      0.0000  
 7858.9190      6162.7027      307.3231      -1696.2163      6226.0055  
 308.4455      35.4619      -17.3640      511540.4688      -14.9706  
 -14.9373  
 [1358]ENERGY: 11260000      3236.4472      5257.6358      5472.1709  
 333.0197      -14376.2868      -1683.0567      0.0000      0.0000  
 7925.1047      6165.0348      309.9113      -1760.0699      6226.7844  
 308.5372      89.1295      61.6720      511540.4688      -15.6664  
 -15.6740  
 [1408]ENERGY: 11270000      3187.0212      5352.3944      5476.7221  
 339.8023      -14335.2312      -1717.4114      0.0000      0.0000  
 7857.2266      6160.5239      307.2570      -1696.7027      6226.1630  
 308.3853      97.4032      97.3096      511540.4688      -15.2012  
 -15.2152  
 [1444]ENERGY: 11280000      3246.6923      5387.1652      5476.1759  
 339.5339      -14524.5933      -1620.5350      0.0000      0.0000  
 7861.5398      6165.9789      307.4256      -1695.5609      6227.9163  
 308.3750      198.6856      224.6670      511540.4688      -18.7447  
 -18.7388  
 [1494]ENERGY: 11290000      3322.9945      5389.2728      5443.5785  
 311.6873      -14369.0911      -1755.4594      0.0000      0.0000  
 7820.1900      6163.1726      305.8087      -1657.0174      6228.0440  
 308.5670      44.8421      -60.7007      511540.4688      -15.8113  
 -15.8156  
 [1533]ENERGY: 11300000      3200.3031      5366.8530      5412.0989  
 312.4286      -14366.2410      -1703.2540      0.0000      0.0000  
 7943.4339      6165.6225      310.6281      -1777.8114      6228.6388  
 308.5360      134.9444      50.2074      511540.4688      -17.8339  
 -17.8296  
 [1583]ENERGY: 11310000      3287.3590      5395.5061      5467.5767  
 311.0096      -14336.5337      -1797.6589      0.0000      0.0000  
 7840.1252      6167.3840      306.5882      -1672.7412      6230.3676

Supplementary Text 6

|                        |             |            |             |           |
|------------------------|-------------|------------|-------------|-----------|
| 308.5525               | 62.4783     | -79.3698   | 511540.4688 | -13.6759  |
| -13.6561               |             |            |             |           |
| [1619]ENERGY: 11320000 | 3248.3635   | 5343.1878  | 5475.6371   |           |
| 318.7826               | -14446.5601 | -1670.3862 | 0.0000      | 0.0000    |
| 7897.6285              | 6166.6532   | 308.8369   | -1730.9754  | 6229.7157 |
| 308.6008               | 83.1055     | 35.0537    | 511540.4688 | -17.9101  |
| -17.9293               |             |            |             |           |
| [1669]ENERGY: 11330000 | 3305.6419   | 5327.5190  | 5432.9279   |           |
| 326.9725               | -14511.6808 | -1680.8907 | 0.0000      | 0.0000    |
| 7964.5556              | 6165.0454   | 311.4541   | -1799.5102  | 6229.2563 |
| 308.5308               | 270.2835    | 152.4854   | 511540.4688 | -15.8350  |
| -15.8168               |             |            |             |           |
| [1705]ENERGY: 11340000 | 3307.3902   | 5331.0373  | 5481.2455   |           |
| 330.0167               | -14381.7089 | -1691.7671 | 0.0000      | 0.0000    |
| 7792.9142              | 6169.1279   | 304.7420   | -1623.7863  | 6230.5033 |
| 308.4826               | -30.6068    | -119.3097  | 511540.4688 | -12.4994  |
| -12.5242               |             |            |             |           |
| [1755]ENERGY: 11350000 | 3318.5609   | 5209.0284  | 5437.1471   |           |
| 326.9806               | -14308.4168 | -1725.3327 | 0.0000      | 0.0000    |
| 7906.0693              | 6164.0369   | 309.1670   | -1742.0324  | 6229.6453 |
| 308.4339               | -40.7946    | -87.2003   | 511540.4688 | -12.7922  |
| -12.7911               |             |            |             |           |
| [1791]ENERGY: 11360000 | 3149.2661   | 5364.8786  | 5446.5448   |           |
| 298.2892               | -14288.1137 | -1774.0771 | 0.0000      | 0.0000    |
| 7969.3087              | 6166.0966   | 311.6399   | -1803.2121  | 6230.6513 |
| 308.3274               | 94.1670     | 135.3351   | 511540.4688 | -13.8965  |
| -13.9072               |             |            |             |           |
| [1841]ENERGY: 11370000 | 3265.8759   | 5348.3952  | 5468.7124   |           |
| 329.0919               | -14337.7067 | -1716.4442 | 0.0000      | 0.0000    |
| 7809.9898              | 6167.9142   | 305.4098   | -1642.0756  | 6231.1338 |
| 308.5673               | 112.0854    | 45.9530    | 511540.4688 | -15.2750  |
| -15.2489               |             |            |             |           |
| [1877]ENERGY: 11380000 | 3202.1731   | 5378.6403  | 5449.7695   |           |
| 338.6100               | -14435.8400 | -1684.2362 | 0.0000      | 0.0000    |
| 7918.4150              | 6167.5317   | 309.6497   | -1750.8833  | 6229.8000 |
| 308.5943               | 191.7274    | 35.2723    | 511540.4688 | -18.0674  |
| -18.0924               |             |            |             |           |
| [1927]ENERGY: 11390000 | 3264.5513   | 5328.8170  | 5449.5655   |           |
| 325.6635               | -14350.8619 | -1745.3279 | 0.0000      | 0.0000    |
| 7895.8906              | 6168.2980   | 308.7689   | -1727.5926  | 6231.1115 |
| 308.7836               | 37.4524     | 85.7410    | 511540.4688 | -15.6766  |
| -15.6491               |             |            |             |           |
| [1966]ENERGY: 11400000 | 3236.5200   | 5301.8713  | 5409.0942   |           |
| 333.5648               | -14385.7592 | -1729.3136 | 0.0000      | 0.0000    |
| 8000.8084              | 6166.7860   | 312.8717   | -1834.0225  | 6230.1929 |
| 308.9120               | 104.6339    | 79.6440    | 511540.4688 | -13.0468  |
| -13.0716               |             |            |             |           |
| [2016]ENERGY: 11410000 | 3281.4645   | 5276.8146  | 5449.7524   |           |
| 304.4299               | -14340.0458 | -1723.2090 | 0.0000      | 0.0000    |
| 7918.6178              | 6167.8245   | 309.6577   | -1750.7934  | 6230.3480 |
| 308.6078               | 1.4010      | 20.2397    | 511540.4688 | -17.0244  |
| -17.0100               |             |            |             |           |
| [2052]ENERGY: 11420000 | 3247.3684   | 5422.7340  | 5409.6712   |           |
| 324.5387               | -14357.3686 | -1714.3325 | 0.0000      | 0.0000    |

## Supplementary Text 6

|                        |             |            |             |           |
|------------------------|-------------|------------|-------------|-----------|
| 7834.5968              | 6167.2080   | 306.3720   | -1667.3887  | 6230.0068 |
| 308.6700               | -36.7808    | -16.0089   | 511540.4688 | -12.1982  |
| -12.2019               |             |            |             |           |
| [2102]ENERGY: 11430000 | 3181.1933   | 5327.8992  | 5455.6804   |           |
| 325.4426               | -14374.9462 | -1713.6076 | 0.0000      | 0.0000    |
| 7963.4695              | 6165.1312   | 311.4116   | -1798.3383  | 6230.7734 |
| 308.6668               | 169.8191    | 132.4729   | 511540.4688 | -16.6060  |
| -16.6233               |             |            |             |           |
| [2138]ENERGY: 11440000 | 3287.3752   | 5395.0947  | 5456.3232   |           |
| 325.2377               | -14324.7500 | -1800.3886 | 0.0000      | 0.0000    |
| 7827.4885              | 6166.3808   | 306.0941   | -1661.1077  | 6231.0513 |
| 308.7394               | -184.4532   | -318.1371  | 511540.4688 | -16.5174  |
| -16.4743               |             |            |             |           |
| [2188]ENERGY: 11450000 | 3277.4371   | 5338.6399  | 5405.6423   |           |
| 322.3503               | -14408.1344 | -1678.4810 | 0.0000      | 0.0000    |
| 7909.3555              | 6166.8096   | 309.2955   | -1742.5458  | 6230.7599 |
| 308.4968               | 36.5214     | -3.9625    | 511540.4688 | -19.5667  |
| -19.5920               |             |            |             |           |
| [2224]ENERGY: 11460000 | 3298.8264   | 5313.4530  | 5449.8031   |           |
| 317.4833               | -14379.3989 | -1685.0001 | 0.0000      | 0.0000    |
| 7853.8029              | 6168.9698   | 307.1231   | -1684.8331  | 6231.0371 |
| 308.3600               | -4.5133     | 1.5833     | 511540.4688 | -15.9758  |
| -15.9715               |             |            |             |           |
| [2274]ENERGY: 11470000 | 3209.3921   | 5338.6262  | 5425.3437   |           |
| 319.7942               | -14375.8962 | -1680.9238 | 0.0000      | 0.0000    |
| 7930.5704              | 6166.9065   | 310.1251   | -1763.6639  | 6230.1176 |
| 308.5929               | 90.0605     | 36.1853    | 511540.4688 | -21.6960  |
| -21.7041               |             |            |             |           |
| [2310]ENERGY: 11480000 | 3287.0431   | 5370.0845  | 5452.9397   |           |
| 317.1461               | -14349.1874 | -1766.2803 | 0.0000      | 0.0000    |
| 7855.5869              | 6167.3325   | 307.1928   | -1688.2544  | 6231.6630 |
| 308.6497               | -157.2666   | -228.2025  | 511540.4688 | -18.0997  |
| -18.0859               |             |            |             |           |
| [2360]ENERGY: 11490000 | 3234.1762   | 5338.6611  | 5391.9811   |           |
| 316.2976               | -14358.5457 | -1708.8839 | 0.0000      | 0.0000    |
| 7955.4061              | 6169.0925   | 311.0963   | -1786.3135  | 6231.3604 |
| 308.2739               | -143.1092   | -117.1587  | 511540.4688 | -15.4765  |
| -15.4766               |             |            |             |           |
| [2399]ENERGY: 11500000 | 3275.8856   | 5282.7933  | 5502.3880   |           |
| 327.3258               | -14364.1361 | -1730.2023 | 0.0000      | 0.0000    |
| 7874.1371              | 6168.1914   | 307.9183   | -1705.9457  | 6232.5455 |
| 308.5184               | 150.3462    | 1.9399     | 511540.4688 | -19.4550  |
| -19.4685               |             |            |             |           |
| [2449]ENERGY: 11510000 | 3224.9887   | 5387.5042  | 5436.0598   |           |
| 331.7085               | -14351.5204 | -1724.4359 | 0.0000      | 0.0000    |
| 7867.6660              | 6171.9709   | 307.6652   | -1695.6951  | 6232.1943 |
| 308.5956               | -9.1781     | 3.8951     | 511540.4688 | -17.6164  |
| -17.6249               |             |            |             |           |
| [2485]ENERGY: 11520000 | 3232.0964   | 5371.0615  | 5449.4856   |           |
| 295.0178               | -14366.9025 | -1708.0406 | 0.0000      | 0.0000    |
| 7895.1722              | 6167.8906   | 308.7408   | -1727.2817  | 6231.4376 |
| 308.5712               | 128.3588    | 53.9812    | 511540.4688 | -19.7113  |
| -19.7111               |             |            |             |           |
| [2535]ENERGY: 11530000 | 3258.2467   | 5387.4283  | 5440.6005   |           |

## Supplementary Text 6

|                        |             |            |             |           |
|------------------------|-------------|------------|-------------|-----------|
| 333.6179               | -14402.0943 | -1726.5963 | 0.0000      | 0.0000    |
| 7874.8813              | 6166.0841   | 307.9474   | -1708.7972  | 6231.2311 |
| 308.4944               | -109.2344   | -114.9267  | 511540.4688 | -15.8511  |
| -15.8204               |             |            |             |           |
| [2571]ENERGY: 11540000 | 3265.0473   | 5408.5943  | 5425.4330   |           |
| 312.5120               | -14408.4198 | -1740.5219 | 0.0000      | 0.0000    |
| 7905.3983              | 6168.0433   | 309.1407   | -1737.3550  | 6231.3454 |
| 308.5561               | 8.5722      | -38.6257   | 511540.4688 | -16.8069  |
| -16.8294               |             |            |             |           |
| [2621]ENERGY: 11550000 | 3237.2854   | 5314.1362  | 5482.4305   |           |
| 316.3550               | -14360.8651 | -1716.7858 | 0.0000      | 0.0000    |
| 7895.2481              | 6167.8044   | 308.7438   | -1727.4437  | 6229.7425 |
| 308.7137               | -162.4433   | -82.9273   | 511540.4688 | -16.6392  |
| -16.6419               |             |            |             |           |
| [2657]ENERGY: 11560000 | 3249.2356   | 5325.4356  | 5442.0056   |           |
| 344.1628               | -14292.4363 | -1725.5135 | 0.0000      | 0.0000    |
| 7823.8111              | 6166.7009   | 305.9503   | -1657.1102  | 6231.2977 |
| 308.7812               | -31.7805    | 31.3969    | 511540.4688 | -17.7718  |
| -17.7594               |             |            |             |           |
| [2707]ENERGY: 11570000 | 3343.6167   | 5330.0742  | 5443.4110   |           |
| 313.4765               | -14416.1852 | -1758.6545 | 0.0000      | 0.0000    |
| 7911.2260              | 6166.9645   | 309.3686   | -1744.2615  | 6231.1568 |
| 308.7023               | -24.2685    | -43.2746   | 511540.4688 | -18.1069  |
| -18.1102               |             |            |             |           |
| [2743]ENERGY: 11580000 | 3306.2344   | 5289.5484  | 5447.8844   |           |
| 315.4341               | -14367.9996 | -1710.8227 | 0.0000      | 0.0000    |
| 7890.1284              | 6170.4074   | 308.5436   | -1719.7210  | 6230.5057 |
| 308.7026               | -25.9566    | -58.1202   | 511540.4688 | -19.2388  |
| -19.2596               |             |            |             |           |
| [2793]ENERGY: 11590000 | 3281.3752   | 5297.2538  | 5404.9086   |           |
| 337.4062               | -14357.4614 | -1744.5748 | 0.0000      | 0.0000    |
| 7950.5069              | 6169.4145   | 310.9047   | -1781.0925  | 6230.9513 |
| 308.7004               | -80.9535    | -12.3299   | 511540.4688 | -17.2690  |
| -17.2594               |             |            |             |           |
| [2832]ENERGY: 11600000 | 3253.2543   | 5344.8525  | 5455.7554   |           |
| 320.0763               | -14395.0136 | -1741.7055 | 0.0000      | 0.0000    |
| 7929.2798              | 6166.4993   | 310.0746   | -1762.7806  | 6231.2033 |
| 308.7035               | 79.8668     | -21.0588   | 511540.4688 | -18.9616  |
| -18.9623               |             |            |             |           |
| [2882]ENERGY: 11610000 | 3244.6750   | 5379.4173  | 5423.0963   |           |
| 325.5939               | -14336.9517 | -1782.4664 | 0.0000      | 0.0000    |
| 7914.8875              | 6168.2519   | 309.5118   | -1746.6356  | 6232.4300 |
| 308.7631               | -40.8219    | -120.8374  | 511540.4688 | -15.8980  |
| -15.8689               |             |            |             |           |
| [2918]ENERGY: 11620000 | 3310.3642   | 5307.6959  | 5452.9397   |           |
| 325.5188               | -14352.8425 | -1683.5626 | 0.0000      | 0.0000    |
| 7808.9058              | 6169.0193   | 305.3674   | -1639.8865  | 6231.9393 |
| 308.8895               | -239.6746   | -241.7359  | 511540.4688 | -15.5376  |
| -15.5684               |             |            |             |           |
| [2968]ENERGY: 11630000 | 3301.0556   | 5257.5103  | 5444.3195   |           |
| 343.5067               | -14296.1501 | -1794.6458 | 0.0000      | 0.0000    |
| 7910.5079              | 6166.1039   | 309.3405   | -1744.4040  | 6232.3646 |
| 308.6108               | -98.0521    | -95.7482   | 511540.4688 | -20.0299  |
| -20.0219               |             |            |             |           |

## Supplementary Text 6

|                        |             |            |             |           |
|------------------------|-------------|------------|-------------|-----------|
| [3004]ENERGY: 11640000 | 3271.3541   | 5384.3397  | 5463.1125   |           |
| 314.7923               | -14367.7749 | -1723.9053 | 0.0000      | 0.0000    |
| 7828.0962              | 6170.0146   | 306.1178   | -1658.0816  | 6231.3205 |
| 308.5211               | -21.1536    | -95.7281   | 511540.4688 | -17.8262  |
| -17.8092               |             |            |             |           |
| [3054]ENERGY: 11650000 | 3204.1001   | 5436.6995  | 5478.2572   |           |
| 321.1437               | -14395.5079 | -1775.0830 | 0.0000      | 0.0000    |
| 7898.5081              | 6168.1176   | 308.8713   | -1730.3905  | 6231.1328 |
| 308.5903               | -39.7341    | -35.2737   | 511540.4688 | -17.5682  |
| -17.5782               |             |            |             |           |
| [3090]ENERGY: 11660000 | 3290.4094   | 5293.4925  | 5460.3058   |           |
| 341.9887               | -14406.3782 | -1655.2864 | 0.0000      | 0.0000    |
| 7844.1968              | 6168.7286   | 306.7474   | -1675.4683  | 6231.6429 |
| 308.8054               | -12.4960    | 5.4320     | 511540.4688 | -17.6061  |
| -17.6115               |             |            |             |           |
| [3140]ENERGY: 11670000 | 3261.7874   | 5256.2921  | 5423.6163   |           |
| 315.5060               | -14319.0702 | -1712.0336 | 0.0000      | 0.0000    |
| 7944.2068              | 6170.3047   | 310.6583   | -1773.9020  | 6233.3037 |
| 308.7714               | 91.9007     | 18.3824    | 511540.4688 | -16.9167  |
| -16.9480               |             |            |             |           |
| [3176]ENERGY: 11680000 | 3204.7350   | 5324.4362  | 5454.7684   |           |
| 323.6391               | -14371.6530 | -1687.4417 | 0.0000      | 0.0000    |
| 7915.3978              | 6163.8819   | 309.5318   | -1751.5159  | 6231.8294 |
| 308.6399               | -22.7523    | 28.5613    | 511540.4688 | -15.6218  |
| -15.5995               |             |            |             |           |
| [3226]ENERGY: 11690000 | 3362.3970   | 5313.7589  | 5491.8308   |           |
| 326.1635               | -14367.9600 | -1762.1077 | 0.0000      | 0.0000    |
| 7810.1119              | 6174.1944   | 305.4145   | -1635.9175  | 6233.7886 |
| 308.6876               | -88.7420    | -189.8748  | 511540.4688 | -18.3244  |
| -18.3116               |             |            |             |           |
| [3265]ENERGY: 11700000 | 3324.6219   | 5298.5927  | 5461.0898   |           |
| 320.0381               | -14351.2594 | -1767.2545 | 0.0000      | 0.0000    |
| 7886.2580              | 6172.0866   | 308.3922   | -1714.1714  | 6233.1906 |
| 308.7816               | 104.6667    | 132.8069   | 511540.4688 | -16.1348  |
| -16.1367               |             |            |             |           |
| [3315]ENERGY: 11710000 | 3288.7683   | 5315.1666  | 5456.0039   |           |
| 338.1116               | -14379.3886 | -1717.5179 | 0.0000      | 0.0000    |
| 7868.5942              | 6169.7381   | 307.7015   | -1698.8561  | 6232.3836 |
| 308.6818               | -24.1921    | -75.5374   | 511540.4688 | -21.1705  |
| -21.1686               |             |            |             |           |
| [3351]ENERGY: 11720000 | 3274.3529   | 5366.0917  | 5478.8129   |           |
| 328.7389               | -14471.2236 | -1656.2205 | 0.0000      | 0.0000    |
| 7846.6982              | 6167.2506   | 306.8453   | -1679.4477  | 6231.6834 |
| 308.7426               | 127.2803    | 144.9498   | 511540.4688 | -15.9728  |
| -15.9941               |             |            |             |           |
| [3401]ENERGY: 11730000 | 3311.3494   | 5364.0273  | 5456.0009   |           |
| 313.5512               | -14331.8345 | -1763.1208 | 0.0000      | 0.0000    |
| 7819.9737              | 6169.9472   | 305.8002   | -1650.0265  | 6232.6200 |
| 308.6731               | -71.7496    | -91.2850   | 511540.4688 | -16.9476  |
| -16.9339               |             |            |             |           |
| [3437]ENERGY: 11740000 | 3324.3823   | 5284.6830  | 5433.0459   |           |
| 302.5221               | -14376.7173 | -1710.9692 | 0.0000      | 0.0000    |
| 7914.1735              | 6171.1204   | 309.4839   | -1743.0532  | 6232.7842 |
| 308.5401               | -50.9750    | -106.8280  | 511540.4688 | -17.9431  |

Supplementary Text 6

-17.9295  
 [3487]ENERGY: 11750000      3279.3559      5358.3768      5512.1819  
 308.6586      -14311.0376      -1787.5208      0.0000      0.0000  
 7811.0587      6171.0735      305.4516      -1639.9852      6233.0482  
 308.7188      -124.0537      -100.2774      511540.4688      -17.7330  
 -17.7519  
 [3523]ENERGY: 11760000      3250.0465      5352.5281      5469.0915  
 342.1592      -14352.1836      -1741.9145      0.0000      0.0000  
 7850.6916      6170.4188      307.0014      -1680.2728      6232.5514  
 308.6739      69.0759      -52.4980      511540.4688      -21.1019  
 -21.0863  
 [3573]ENERGY: 11770000      3232.6696      5271.7299      5430.2394  
 322.0222      -14281.9194      -1726.7327      0.0000      0.0000  
 7922.7660      6170.7750      309.8199      -1751.9909      6232.8702  
 308.4990      -1.0776      -44.5095      511540.4688      -17.2805  
 -17.2723  
 [3609]ENERGY: 11780000      3306.3474      5332.5201      5490.1832  
 324.3004      -14360.2284      -1782.2765      0.0000      0.0000  
 7861.0060      6171.8522      307.4048      -1689.1539      6233.0321  
 308.5152      -269.0003      -185.1403      511540.4688      -17.2827  
 -17.2929  
 [3659]ENERGY: 11790000      3156.1997      5409.0842      5461.6818  
 329.0797      -14324.0049      -1713.0241      0.0000      0.0000  
 7845.7751      6164.7915      306.8092      -1680.9836      6234.4934  
 308.4657      260.7497      199.1925      511540.4688      -15.2282  
 -15.2200  
 [3698]ENERGY: 11800000      3316.4172      5368.2067      5452.6426  
 340.6054      -14418.7854      -1753.0525      0.0000      0.0000  
 7866.5886      6172.6226      307.6231      -1693.9659      6233.9118  
 308.3541      -78.6658      -87.7452      511540.4688      -15.7937  
 -15.7995  
 [3748]ENERGY: 11810000      3240.1419      5356.1367      5433.9625  
 313.2437      -14336.3396      -1712.8632      0.0000      0.0000  
 7876.3970      6170.6791      308.0066      -1705.7179      6232.6290  
 308.3992      -59.2724      -37.6672      511540.4688      -19.5642  
 -19.5682  
 [3784]ENERGY: 11820000      3223.2268      5363.2434      5412.3179  
 331.5787      -14262.7057      -1777.4051      0.0000      0.0000  
 7880.7764      6171.0323      308.1779      -1709.7440      6234.3491  
 308.4859      43.0712      37.2871      511540.4688      -14.6037  
 -14.6072  
 [3834]ENERGY: 11830000      3253.8428      5341.8365      5494.4804  
 330.7029      -14458.0267      -1690.8004      0.0000      0.0000  
 7899.1879      6171.2235      308.8979      -1727.9644      6234.9577  
 308.3907      -94.1610      -92.5118      511540.4688      -15.7360  
 -15.7352  
 [3870]ENERGY: 11840000      3226.1870      5386.5667      5468.6134  
 311.2222      -14329.4438      -1708.2996      0.0000      0.0000  
 7818.3043      6173.1501      305.7349      -1645.1541      6235.0155  
 308.4423      -101.4649      -103.3511      511540.4688      -14.2701  
 -14.2677  
 [3920]ENERGY: 11850000      3200.8837      5181.8712      5471.9168  
 309.8000      -14280.4284      -1659.1945      0.0000      0.0000  
 7941.7328      6166.5816      310.5616      -1775.1512      6232.8561

Supplementary Text 6

|                        |             |            |             |           |
|------------------------|-------------|------------|-------------|-----------|
| 308.4237               | 173.0606    | 119.2381   | 511540.4688 | -15.5080  |
| -15.5084               |             |            |             |           |
| [3956]ENERGY: 11860000 | 3230.8313   | 5422.9363  | 5432.3258   |           |
| 320.4548               | -14415.6450 | -1678.7129 | 0.0000      | 0.0000    |
| 7858.3842              | 6170.5745   | 307.3022   | -1687.8097  | 6233.1806 |
| 308.2500               | 100.9210    | 85.1819    | 511540.4688 | -16.8754  |
| -16.9069               |             |            |             |           |
| [4006]ENERGY: 11870000 | 3284.9022   | 5288.7906  | 5479.0467   |           |
| 313.2516               | -14447.7617 | -1651.8652 | 0.0000      | 0.0000    |
| 7900.2619              | 6166.6261   | 308.9399   | -1733.6357  | 6234.4538 |
| 308.5075               | 110.9484    | 40.0031    | 511540.4688 | -16.1512  |
| -16.1107               |             |            |             |           |
| [4042]ENERGY: 11880000 | 3258.9961   | 5366.7352  | 5431.5381   |           |
| 339.6655               | -14388.6337 | -1699.7450 | 0.0000      | 0.0000    |
| 7863.3605              | 6171.9167   | 307.4968   | -1691.4438  | 6234.9615 |
| 308.8543               | 48.9686     | 49.9251    | 511540.4688 | -17.2987  |
| -17.3007               |             |            |             |           |
| [4092]ENERGY: 11890000 | 3276.9864   | 5347.7690  | 5434.2062   |           |
| 322.0408               | -14365.8119 | -1720.0116 | 0.0000      | 0.0000    |
| 7874.1294              | 6169.3083   | 307.9180   | -1704.8211  | 6234.7072 |
| 308.5706               | -15.3847    | -31.8458   | 511540.4688 | -18.9076  |
| -18.9019               |             |            |             |           |
| [4131]ENERGY: 11900000 | 3262.0405   | 5320.7913  | 5494.4684   |           |
| 339.3284               | -14383.2525 | -1701.7140 | 0.0000      | 0.0000    |
| 7840.0077              | 6171.6697   | 306.5836   | -1668.3380  | 6234.6695 |
| 308.9116               | 32.1007     | 109.9277   | 511540.4688 | -11.2704  |
| -11.2849               |             |            |             |           |
| [4181]ENERGY: 11910000 | 3254.3719   | 5299.5657  | 5476.1136   |           |
| 330.4087               | -14333.6680 | -1700.4878 | 0.0000      | 0.0000    |
| 7848.4514              | 6174.7555   | 306.9138   | -1673.6959  | 6236.1272 |
| 308.5814               | -73.6539    | -92.7964   | 511540.4688 | -15.7584  |
| -15.7419               |             |            |             |           |
| [4217]ENERGY: 11920000 | 3293.5786   | 5374.5893  | 5443.1487   |           |
| 304.5312               | -14365.6163 | -1731.7267 | 0.0000      | 0.0000    |
| 7856.4890              | 6174.9939   | 307.2281   | -1681.4952  | 6235.7111 |
| 308.7402               | -106.4826   | -153.0310  | 511540.4688 | -17.7768  |
| -17.7798               |             |            |             |           |
| [4267]ENERGY: 11930000 | 3314.2674   | 5308.5642  | 5446.4377   |           |
| 290.5970               | -14304.8749 | -1806.3695 | 0.0000      | 0.0000    |
| 7923.8704              | 6172.4921   | 309.8631   | -1751.3782  | 6235.8720 |
| 308.7166               | -75.8751    | -124.0108  | 511540.4688 | -14.4060  |
| -14.4138               |             |            |             |           |
| [4303]ENERGY: 11940000 | 3273.8470   | 5317.6959  | 5465.3050   |           |
| 329.5442               | -14411.1866 | -1706.6212 | 0.0000      | 0.0000    |
| 7902.9109              | 6171.4952   | 309.0435   | -1731.4157  | 6235.3243 |
| 308.6995               | 114.1227    | -28.9692   | 511540.4688 | -14.6926  |
| -14.7023               |             |            |             |           |
| [4353]ENERGY: 11950000 | 3378.4175   | 5261.4660  | 5476.3553   |           |
| 296.0504               | -14394.4470 | -1694.3286 | 0.0000      | 0.0000    |
| 7851.8564              | 6175.3699   | 307.0470   | -1676.4865  | 6234.5129 |
| 308.6242               | 75.5151     | 22.0832    | 511540.4688 | -16.1250  |
| -16.1253               |             |            |             |           |
| [4389]ENERGY: 11960000 | 3320.0454   | 5270.6751  | 5468.3064   |           |
| 315.8915               | -14424.3141 | -1710.8360 | 0.0000      | 0.0000    |

Supplementary Text 6

|                        |             |            |             |           |
|------------------------|-------------|------------|-------------|-----------|
| 7929.3015              | 6169.0699   | 310.0755   | -1760.2316  | 6236.1519 |
| 308.5927               | -17.6044    | -126.1369  | 511540.4688 | -13.8006  |
| -13.8034               |             |            |             |           |
| [4439]ENERGY: 11970000 | 3249.4702   | 5384.6747  | 5417.4446   |           |
| 325.9220               | -14288.6066 | -1753.8684 | 0.0000      | 0.0000    |
| 7838.5460              | 6173.5826   | 306.5265   | -1664.9634  | 6235.1479 |
| 308.6229               | -111.1313   | -0.0980    | 511540.4688 | -15.4655  |
| -15.4306               |             |            |             |           |
| [4475]ENERGY: 11980000 | 3209.7306   | 5326.7782  | 5452.4733   |           |
| 319.7185               | -14307.4928 | -1741.6053 | 0.0000      | 0.0000    |
| 7911.0258              | 6170.6282   | 309.3608   | -1740.3976  | 6236.1016 |
| 308.7377               | -12.9870    | 17.0887    | 511540.4688 | -16.4499  |
| -16.4819               |             |            |             |           |
| [4525]ENERGY: 11990000 | 3304.7763   | 5350.2340  | 5478.0442   |           |
| 317.7195               | -14404.9203 | -1729.8984 | 0.0000      | 0.0000    |
| 7850.6294              | 6166.5847   | 306.9990   | -1684.0447  | 6235.1959 |
| 308.6110               | -7.4606     | -75.2663   | 511540.4688 | -18.2370  |
| -18.2231               |             |            |             |           |
| [4564]ENERGY: 12000000 | 3271.6873   | 5295.6104  | 5452.0315   |           |
| 313.1627               | -14344.6415 | -1753.0522 | 0.0000      | 0.0000    |
| 7938.8719              | 6173.6702   | 310.4497   | -1765.2017  | 6235.8370 |
| 308.6664               | 42.5231     | -4.9783    | 511540.4688 | -16.3224  |
| -16.3226               |             |            |             |           |
| [4614]ENERGY: 12010000 | 3290.6318   | 5339.6379  | 5465.1453   |           |
| 315.0076               | -14409.8057 | -1708.0461 | 0.0000      | 0.0000    |
| 7876.6109              | 6169.1817   | 308.0150   | -1707.4292  | 6235.5252 |
| 308.8811               | 13.3296     | -61.4501   | 511540.4688 | -17.6559  |
| -17.6679               |             |            |             |           |
| [4650]ENERGY: 12020000 | 3313.8284   | 5426.0869  | 5424.4142   |           |
| 329.9317               | -14489.4743 | -1648.5716 | 0.0000      | 0.0000    |
| 7818.8356              | 6175.0508   | 305.7557   | -1643.7847  | 6236.5801 |
| 308.7610               | 157.2436    | 90.0753    | 511540.4688 | -16.1796  |
| -16.1756               |             |            |             |           |
| [4700]ENERGY: 12030000 | 3290.7285   | 5341.0180  | 5489.0582   |           |
| 344.9661               | -14404.5350 | -1719.2885 | 0.0000      | 0.0000    |
| 7831.9266              | 6173.8740   | 306.2676   | -1658.0526  | 6236.6105 |
| 308.7816               | -73.8369    | -56.7305   | 511540.4688 | -11.7445  |
| -11.7465               |             |            |             |           |
| [4736]ENERGY: 12040000 | 3238.3265   | 5357.9282  | 5464.3161   |           |
| 315.8663               | -14333.5623 | -1742.9095 | 0.0000      | 0.0000    |
| 7870.2558              | 6170.2210   | 307.7665   | -1700.0348  | 6236.9803 |
| 308.7338               | 89.4117     | -31.1899   | 511540.4688 | -16.4077  |
| -16.4015               |             |            |             |           |
| [4786]ENERGY: 12050000 | 3253.1212   | 5423.4383  | 5487.7372   |           |
| 327.6158               | -14395.8751 | -1696.1582 | 0.0000      | 0.0000    |
| 7780.6192              | 6180.4984   | 304.2612   | -1600.1208  | 6237.9835 |
| 308.6988               | 275.0514    | 116.6630   | 511540.4688 | -18.5590  |
| -18.5681               |             |            |             |           |
| [4822]ENERGY: 12060000 | 3193.9563   | 5337.2049  | 5474.2631   |           |
| 341.6835               | -14401.5868 | -1671.3476 | 0.0000      | 0.0000    |
| 7896.1237              | 6170.2971   | 308.7780   | -1725.8266  | 6236.9711 |
| 308.6996               | -39.4127    | -11.3214   | 511540.4688 | -19.1725  |
| -19.1684               |             |            |             |           |
| [4872]ENERGY: 12070000 | 3250.2829   | 5292.8981  | 5454.1332   |           |



## Supplementary Text 6

|                        |             |            |             |           |
|------------------------|-------------|------------|-------------|-----------|
| 349.2148               | -14338.5955 | -1741.0011 | 0.0000      | 0.0000    |
| 7905.2834              | 6172.2157   | 309.1362   | -1733.0677  | 6237.0082 |
| 308.6415               | 133.3163    | 28.6960    | 511540.4688 | -20.8400  |
| -20.7937               |             |            |             |           |
| [4908]ENERGY: 12080000 | 3249.7996   | 5336.0831  | 5376.8834   |           |
| 337.9972               | -14288.1810 | -1754.3579 | 0.0000      | 0.0000    |
| 7914.0556              | 6172.2800   | 309.4793   | -1741.7757  | 6237.7495 |
| 308.6769               | -27.2543    | -79.4303   | 511540.4688 | -20.3261  |
| -20.3688               |             |            |             |           |
| [4958]ENERGY: 12090000 | 3213.7962   | 5275.8853  | 5444.4984   |           |
| 323.8718               | -14356.7518 | -1720.5019 | 0.0000      | 0.0000    |
| 7989.7137              | 6170.5116   | 312.4379   | -1819.2021  | 6237.5444 |
| 308.6078               | 112.3765    | -29.8480   | 511540.4688 | -20.5468  |
| -20.5623               |             |            |             |           |
| [4997]ENERGY: 12100000 | 3198.7187   | 5370.9456  | 5429.9745   |           |
| 310.5105               | -14330.8382 | -1712.0369 | 0.0000      | 0.0000    |
| 7909.7976              | 6177.0718   | 309.3128   | -1732.7258  | 6237.9664 |
| 308.8539               | -74.6866    | -72.9286   | 511540.4688 | -16.5984  |
| -16.5726               |             |            |             |           |
| [5047]ENERGY: 12110000 | 3224.9816   | 5331.6383  | 5515.2810   |           |
| 329.3289               | -14370.7131 | -1765.1142 | 0.0000      | 0.0000    |
| 7910.6215              | 6176.0240   | 309.3450   | -1734.5975  | 6238.3734 |
| 308.6865               | -62.2267    | -33.2240   | 511540.4688 | -18.9654  |
| -18.9556               |             |            |             |           |
| [5083]ENERGY: 12120000 | 3311.5878   | 5364.4539  | 5435.5258   |           |
| 301.0123               | -14368.6188 | -1737.4981 | 0.0000      | 0.0000    |
| 7868.8673              | 6175.3302   | 307.7122   | -1693.5371  | 6237.8897 |
| 308.6983               | -15.2336    | -125.2395  | 511540.4688 | -19.4444  |
| -19.4656               |             |            |             |           |
| [5133]ENERGY: 12130000 | 3353.3969   | 5411.8338  | 5389.1642   |           |
| 302.3936               | -14411.5193 | -1734.6270 | 0.0000      | 0.0000    |
| 7864.2228              | 6174.8649   | 307.5306   | -1689.3579  | 6238.9511 |
| 308.5938               | 0.3592      | -49.4062   | 511540.4688 | -15.0213  |
| -15.0294               |             |            |             |           |
| [5169]ENERGY: 12140000 | 3325.4275   | 5303.6189  | 5474.6425   |           |
| 328.9304               | -14398.2826 | -1782.5213 | 0.0000      | 0.0000    |
| 7924.4033              | 6176.2187   | 309.8839   | -1748.1846  | 6237.3588 |
| 308.5697               | -196.1735   | -139.3871  | 511540.4688 | -23.7452  |
| -23.7269               |             |            |             |           |
| [5219]ENERGY: 12150000 | 3322.2788   | 5327.6230  | 5476.6618   |           |
| 318.7749               | -14358.8188 | -1757.6587 | 0.0000      | 0.0000    |
| 7849.3666              | 6178.2276   | 306.9496   | -1671.1391  | 6237.5319 |
| 308.5412               | -145.4873   | -69.3319   | 511540.4688 | -16.2716  |
| -16.2721               |             |            |             |           |
| [5255]ENERGY: 12160000 | 3202.7264   | 5386.1325  | 5456.5461   |           |
| 323.2339               | -14426.6350 | -1733.3993 | 0.0000      | 0.0000    |
| 7960.7101              | 6169.3147   | 311.3037   | -1791.3954  | 6237.4369 |
| 308.6756               | 70.7833     | -3.8766    | 511540.4688 | -19.0377  |
| -19.0746               |             |            |             |           |
| [5305]ENERGY: 12170000 | 3281.4428   | 5322.9419  | 5406.3835   |           |
| 301.8382               | -14279.4481 | -1713.3498 | 0.0000      | 0.0000    |
| 7858.9221              | 6178.7305   | 307.3233   | -1680.1915  | 6237.3797 |
| 308.5837               | 52.6089     | 103.8918   | 511540.4688 | -20.5634  |
| -20.5270               |             |            |             |           |

## Supplementary Text 6

|                        |             |            |             |           |
|------------------------|-------------|------------|-------------|-----------|
| [5341]ENERGY: 12180000 | 3241.0651   | 5373.2862  | 5524.0632   |           |
| 319.3029               | -14393.1452 | -1766.4109 | 0.0000      | 0.0000    |
| 7878.2668              | 6176.4280   | 308.0797   | -1701.8388  | 6238.1112 |
| 308.7519               | 36.0774     | 3.2058     | 511540.4688 | -13.4949  |
| -13.5174               |             |            |             |           |
| [5391]ENERGY: 12190000 | 3307.5766   | 5347.9018  | 5452.3257   |           |
| 336.9674               | -14398.0107 | -1717.7425 | 0.0000      | 0.0000    |
| 7848.5844              | 6177.6027   | 306.9190   | -1670.9817  | 6238.1666 |
| 308.8502               | 14.9135     | 77.3482    | 511540.4688 | -20.9992  |
| -20.9987               |             |            |             |           |
| [5430]ENERGY: 12200000 | 3240.1615   | 5294.7877  | 5442.6211   |           |
| 321.0414               | -14260.2106 | -1698.2423 | 0.0000      | 0.0000    |
| 7836.8009              | 6176.9597   | 306.4582   | -1659.8412  | 6237.5157 |
| 308.7678               | 37.3769     | 47.5452    | 511540.4688 | -19.8831  |
| -19.8690               |             |            |             |           |
| [5480]ENERGY: 12210000 | 3295.6224   | 5423.2444  | 5453.4961   |           |
| 323.2139               | -14382.1323 | -1737.6570 | 0.0000      | 0.0000    |
| 7800.8836              | 6176.6711   | 305.0537   | -1624.2125  | 6237.8214 |
| 308.8973               | 118.6801    | 58.7854    | 511540.4688 | -16.9679  |
| -16.9699               |             |            |             |           |
| [5516]ENERGY: 12220000 | 3290.7937   | 5360.9002  | 5489.3535   |           |
| 305.0143               | -14446.3354 | -1691.6950 | 0.0000      | 0.0000    |
| 7867.0899              | 6175.1212   | 307.6427   | -1691.9687  | 6238.3927 |
| 308.7195               | -95.4265    | -2.5130    | 511540.4688 | -19.7960  |
| -19.8058               |             |            |             |           |
| [5566]ENERGY: 12230000 | 3181.1944   | 5374.7817  | 5437.7439   |           |
| 329.8109               | -14382.8847 | -1688.9765 | 0.0000      | 0.0000    |
| 7921.6751              | 6173.3449   | 309.7772   | -1748.3302  | 6238.6401 |
| 308.8443               | 196.1046    | 138.5509   | 511540.4688 | -19.4602  |
| -19.4425               |             |            |             |           |
| [5602]ENERGY: 12240000 | 3231.1769   | 5337.0472  | 5415.2310   |           |
| 318.6147               | -14338.1593 | -1720.1030 | 0.0000      | 0.0000    |
| 7930.3387              | 6174.1462   | 310.1160   | -1756.1925  | 6238.0458 |
| 308.8855               | -163.3919   | -85.0076   | 511540.4688 | -12.9846  |
| -12.9975               |             |            |             |           |
| [5652]ENERGY: 12250000 | 3256.0000   | 5391.3571  | 5521.1362   |           |
| 320.8856               | -14439.6750 | -1704.2224 | 0.0000      | 0.0000    |
| 7827.1686              | 6172.6501   | 306.0815   | -1654.5185  | 6237.6274 |
| 308.7260               | -61.7002    | -106.0764  | 511540.4688 | -19.8271  |
| -19.8342               |             |            |             |           |
| [5688]ENERGY: 12260000 | 3277.0819   | 5308.7277  | 5457.6459   |           |
| 339.0541               | -14346.2268 | -1766.0666 | 0.0000      | 0.0000    |
| 7904.6230              | 6174.8393   | 309.1104   | -1729.7837  | 6238.0264 |
| 308.6800               | -227.5907   | -154.3129  | 511540.4688 | -15.6856  |
| -15.6571               |             |            |             |           |
| [5738]ENERGY: 12270000 | 3292.1298   | 5348.5501  | 5412.1808   |           |
| 341.6855               | -14298.4172 | -1739.3484 | 0.0000      | 0.0000    |
| 7818.8527              | 6175.6333   | 305.7564   | -1643.2195  | 6237.5035 |
| 308.7696               | 33.5310     | -30.5965   | 511540.4688 | -15.7787  |
| -15.7940               |             |            |             |           |
| [5774]ENERGY: 12280000 | 3262.9648   | 5376.1676  | 5428.6547   |           |
| 311.7520               | -14375.1284 | -1702.8088 | 0.0000      | 0.0000    |
| 7872.2989              | 6173.9008   | 307.8464   | -1698.3981  | 6238.0134 |
| 308.5548               | -206.8291   | -121.1057  | 511540.4688 | -18.0234  |

Supplementary Text 6

-18.0041  
 [5824]ENERGY: 12290000      3227.4434      5345.3039      5445.3510  
 325.4155      -14425.9091      -1714.1327      0.0000      0.0000  
 7967.7926      6171.2645      311.5807      -1796.5281      6237.3548  
 308.6548      28.9084      -18.6553      511540.4688      -20.4554  
 -20.4923  
 [5863]ENERGY: 12300000      3335.6413      5445.6677      5419.3782  
 338.2025      -14500.1792      -1668.8402      0.0000      0.0000  
 7807.9340      6177.8043      305.3294      -1630.1297      6237.5017  
 308.4750      -26.0297      -98.5851      511540.4688      -14.7718  
 -14.7620  
 [5913]ENERGY: 12310000      3243.8798      5234.0732      5482.3185  
 330.6990      -14285.0638      -1756.6941      0.0000      0.0000  
 7925.4683      6174.6807      309.9256      -1750.7875      6238.0616  
 308.4982      -255.7085      -195.0960      511540.4688      -11.4642  
 -11.4369  
 [5949]ENERGY: 12320000      3314.9937      5327.3766      5401.2426  
 335.9826      -14337.0820      -1733.3657      0.0000      0.0000  
 7869.1639      6178.3116      307.7238      -1690.8523      6238.5242  
 308.5837      62.5562      78.4094      511540.4688      -20.9754  
 -20.9858  
 [5999]ENERGY: 12330000      3319.0338      5320.0711      5396.6177  
 300.0379      -14390.1012      -1674.8633      0.0000      0.0000  
 7905.8633      6176.6592      309.1589      -1729.2041      6238.5900  
 308.8326      -133.7382      -168.5937      511540.4688      -14.6655  
 -14.6758  
 [6035]ENERGY: 12340000      3293.9266      5277.5188      5421.2602  
 318.3401      -14331.3089      -1749.3242      0.0000      0.0000  
 7942.6436      6173.0561      310.5972      -1769.5875      6238.8557  
 308.7284      -58.3613      -74.7851      511540.4688      -15.6851  
 -15.6797  
 [6085]ENERGY: 12350000      3299.8475      5218.6206      5424.8713  
 314.7597      -14199.8264      -1806.2635      0.0000      0.0000  
 7921.8427      6173.8519      309.7838      -1747.9908      6238.7706  
 308.9698      -104.5076      -235.6943      511540.4688      -14.4180  
 -14.4349  
 [6121]ENERGY: 12360000      3245.6774      5289.1589      5458.9134  
 341.4063      -14349.6560      -1737.1334      0.0000      0.0000  
 7926.1469      6174.5134      309.9521      -1751.6335      6238.3273  
 308.5603      26.5127      -40.9436      511540.4688      -20.3296  
 -20.3109  
 [6171]ENERGY: 12370000      3176.8836      5319.8336      5421.7745  
 327.0963      -14331.7957      -1723.1856      0.0000      0.0000  
 7978.8405      6169.4472      312.0127      -1809.3933      6238.3300  
 308.6440      158.4403      87.3371      511540.4688      -19.4697  
 -19.4676  
 [6207]ENERGY: 12380000      3193.5772      5416.6921      5459.1340  
 297.8183      -14366.0837      -1741.7890      0.0000      0.0000  
 7915.2617      6174.6106      309.5264      -1740.6510      6238.9555  
 308.9324      11.7108      3.1501      511540.4688      -17.9320  
 -17.9291  
 [6257]ENERGY: 12390000      3304.7706      5343.5183      5445.1505  
 329.2144      -14347.6319      -1722.9600      0.0000      0.0000  
 7825.2030      6177.2650      306.0047      -1647.9380      6239.1347

## Supplementary Text 6

|                        |             |            |             |           |
|------------------------|-------------|------------|-------------|-----------|
| 308.8268               | 36.4272     | -35.3788   | 511540.4688 | -12.7726  |
| -12.7917               |             |            |             |           |
| [6296]ENERGY: 12400000 | 3275.1953   | 5392.2704  | 5453.8312   |           |
| 308.9483               | -14347.7526 | -1774.5754 | 0.0000      | 0.0000    |
| 7867.7273              | 6175.6444   | 307.6676   | -1692.0828  | 6239.7785 |
| 308.7968               | -152.7960   | -266.3310  | 511540.4688 | -17.0122  |
| -17.0055               |             |            |             |           |
| [6346]ENERGY: 12410000 | 3185.2599   | 5396.1309  | 5459.4274   |           |
| 337.2548               | -14411.2033 | -1679.7036 | 0.0000      | 0.0000    |
| 7886.8478              | 6174.0139   | 308.4153   | -1712.8339  | 6239.0997 |
| 308.6042               | 200.1393    | 155.9477   | 511540.4688 | -13.9082  |
| -13.9235               |             |            |             |           |
| [6382]ENERGY: 12420000 | 3316.7608   | 5239.1823  | 5434.1635   |           |
| 317.1342               | -14339.8044 | -1734.9875 | 0.0000      | 0.0000    |
| 7942.5054              | 6174.9543   | 310.5918   | -1767.5511  | 6239.6601 |
| 308.5911               | 112.5779    | 44.6716    | 511540.4688 | -19.3817  |
| -19.3485               |             |            |             |           |
| [6432]ENERGY: 12430000 | 3229.7406   | 5349.0779  | 5478.4593   |           |
| 321.9167               | -14355.9530 | -1697.8481 | 0.0000      | 0.0000    |
| 7850.2106              | 6175.6040   | 306.9826   | -1674.6066  | 6240.6640 |
| 308.7117               | 150.5393    | 27.3729    | 511540.4688 | -17.0624  |
| -17.0687               |             |            |             |           |
| [6468]ENERGY: 12440000 | 3351.8464   | 5276.2239  | 5481.2677   |           |
| 323.9099               | -14405.0728 | -1699.1631 | 0.0000      | 0.0000    |
| 7850.9597              | 6179.9716   | 307.0119   | -1670.9880  | 6240.3042 |
| 308.6318               | 31.3886     | -71.6896   | 511540.4688 | -19.4223  |
| -19.4581               |             |            |             |           |
| [6518]ENERGY: 12450000 | 3340.9125   | 5265.6184  | 5421.0360   |           |
| 312.3685               | -14355.2050 | -1752.7440 | 0.0000      | 0.0000    |
| 7943.9320              | 6175.9184   | 310.6476   | -1768.0136  | 6240.9865 |
| 308.7173               | -98.9260    | -77.9948   | 511540.4688 | -13.5888  |
| -13.5466               |             |            |             |           |
| [6554]ENERGY: 12460000 | 3229.3198   | 5377.6852  | 5456.1297   |           |
| 323.3910               | -14446.9784 | -1763.9075 | 0.0000      | 0.0000    |
| 7999.0996              | 6174.7394   | 312.8049   | -1824.3601  | 6239.9200 |
| 308.6631               | -105.3653   | -82.9705   | 511540.4688 | -21.3178  |
| -21.3114               |             |            |             |           |
| [6604]ENERGY: 12470000 | 3257.6060   | 5313.8196  | 5470.3196   |           |
| 308.4480               | -14391.5140 | -1661.0931 | 0.0000      | 0.0000    |
| 7880.4184              | 6178.0045   | 308.1639   | -1702.4139  | 6239.7039 |
| 308.8386               | 180.1279    | 70.1184    | 511540.4688 | -17.0008  |
| -17.0393               |             |            |             |           |
| [6640]ENERGY: 12480000 | 3212.0776   | 5351.9852  | 5425.7924   |           |
| 320.1856               | -14374.5709 | -1698.6927 | 0.0000      | 0.0000    |
| 7939.2574              | 6176.0346   | 310.4648   | -1763.2228  | 6240.5546 |
| 308.7711               | 145.6174    | 74.4160    | 511540.4688 | -16.3296  |
| -16.3263               |             |            |             |           |
| [6690]ENERGY: 12490000 | 3262.1761   | 5274.1550  | 5482.4446   |           |
| 332.5754               | -14363.6834 | -1748.8752 | 0.0000      | 0.0000    |
| 7934.6030              | 6173.3956   | 310.2828   | -1761.2074  | 6241.2177 |
| 308.7476               | 116.5102    | 74.9269    | 511540.4688 | -12.6877  |
| -12.6839               |             |            |             |           |
| [6729]ENERGY: 12500000 | 3246.0994   | 5291.6578  | 5478.8175   |           |
| 315.5910               | -14420.6229 | -1700.4312 | 0.0000      | 0.0000    |

## Supplementary Text 6

|                        |             |            |             |           |
|------------------------|-------------|------------|-------------|-----------|
| 7964.0411              | 6175.1527   | 311.4339   | -1788.8884  | 6240.6951 |
| 308.6174               | -21.1200    | 26.1928    | 511540.4688 | -18.4679  |
| -18.4602               |             |            |             |           |
| [6779]ENERGY: 12510000 | 3319.2733   | 5328.2229  | 5491.0526   |           |
| 320.7774               | -14385.6947 | -1752.9820 | 0.0000      | 0.0000    |
| 7858.5562              | 6179.2057   | 307.3090   | -1679.3505  | 6241.8177 |
| 308.6845               | -51.3230    | -132.2556  | 511540.4688 | -17.3295  |
| -17.3053               |             |            |             |           |
| [6815]ENERGY: 12520000 | 3264.7316   | 5313.2846  | 5392.4707   |           |
| 332.0378               | -14331.4671 | -1690.5347 | 0.0000      | 0.0000    |
| 7894.9285              | 6175.4513   | 308.7313   | -1719.4772  | 6239.9764 |
| 308.6338               | -104.0779   | -37.2950   | 511540.4688 | -20.6522  |
| -20.6919               |             |            |             |           |
| [6865]ENERGY: 12530000 | 3286.5372   | 5258.3455  | 5427.7880   |           |
| 314.7008               | -14323.6339 | -1735.6924 | 0.0000      | 0.0000    |
| 7946.1979              | 6174.2432   | 310.7362   | -1771.9547  | 6240.0198 |
| 308.7626               | 125.4475    | -15.0795   | 511540.4688 | -19.5067  |
| -19.4801               |             |            |             |           |
| [6901]ENERGY: 12540000 | 3295.3561   | 5337.5638  | 5458.7325   |           |
| 325.2630               | -14322.0489 | -1778.6397 | 0.0000      | 0.0000    |
| 7863.3042              | 6179.5310   | 307.4946   | -1683.7732  | 6240.9120 |
| 308.7681               | -82.8542    | -47.7465   | 511540.4688 | -15.3887  |
| -15.3897               |             |            |             |           |
| [6951]ENERGY: 12550000 | 3230.7470   | 5327.1191  | 5499.2808   |           |
| 313.1159               | -14414.8142 | -1707.7333 | 0.0000      | 0.0000    |
| 7929.7697              | 6177.4851   | 310.0938   | -1752.2846  | 6241.0352 |
| 308.6860               | -77.6768    | -55.3388   | 511540.4688 | -18.5116  |
| -18.5316               |             |            |             |           |
| [6987]ENERGY: 12560000 | 3350.4434   | 5277.8092  | 5469.1760   |           |
| 329.7558               | -14300.2365 | -1776.8859 | 0.0000      | 0.0000    |
| 7830.3672              | 6180.4292   | 306.2066   | -1649.9380  | 6240.8377 |
| 308.7781               | -254.4588   | -237.5636  | 511540.4688 | -13.2578  |
| -13.2476               |             |            |             |           |
| [7037]ENERGY: 12570000 | 3187.6970   | 5252.6257  | 5482.9078   |           |
| 320.7589               | -14283.9996 | -1682.7536 | 0.0000      | 0.0000    |
| 7901.2372              | 6178.4734   | 308.9780   | -1722.7638  | 6239.3025 |
| 308.8733               | -46.7474    | 113.6923   | 511540.4688 | -16.2524  |
| -16.2463               |             |            |             |           |
| [7073]ENERGY: 12580000 | 3297.0453   | 5340.9994  | 5436.2570   |           |
| 317.5502               | -14431.7190 | -1642.3326 | 0.0000      | 0.0000    |
| 7860.2290              | 6178.0293   | 307.3744   | -1682.1997  | 6241.7580 |
| 308.7899               | 73.5653     | 12.0134    | 511540.4688 | -12.4593  |
| -12.4634               |             |            |             |           |
| [7123]ENERGY: 12590000 | 3287.0233   | 5283.1590  | 5485.3031   |           |
| 335.4099               | -14344.3710 | -1717.9060 | 0.0000      | 0.0000    |
| 7849.8556              | 6178.4739   | 306.9687   | -1671.3817  | 6239.9639 |
| 308.8514               | 37.9883     | 51.6727    | 511540.4688 | -15.8500  |
| -15.8401               |             |            |             |           |
| [7162]ENERGY: 12600000 | 3344.5061   | 5366.6670  | 5452.3839   |           |
| 343.3640               | -14477.1775 | -1676.8416 | 0.0000      | 0.0000    |
| 7826.6184              | 6179.5203   | 306.0600   | -1647.0980  | 6240.6059 |
| 308.8359               | -129.1756   | 7.2629     | 511540.4688 | -15.8749  |
| -15.8827               |             |            |             |           |
| [7212]ENERGY: 12610000 | 3203.9573   | 5391.6573  | 5479.7753   |           |

## Supplementary Text 6

|                        |             |            |             |           |
|------------------------|-------------|------------|-------------|-----------|
| 329.6340               | -14410.2029 | -1749.6528 | 0.0000      | 0.0000    |
| 7928.5710              | 6173.7391   | 310.0469   | -1754.8319  | 6240.6219 |
| 308.8289               | -23.1633    | -83.0419   | 511540.4688 | -12.7816  |
| -12.7891               |             |            |             |           |
| [7248]ENERGY: 12620000 | 3236.9346   | 5245.2203  | 5418.3413   |           |
| 327.5861               | -14310.7865 | -1667.9503 | 0.0000      | 0.0000    |
| 7930.2184              | 6179.5639   | 310.1113   | -1750.6545  | 6242.4915 |
| 308.6943               | 169.4711    | 16.9316    | 511540.4688 | -14.9818  |
| -14.9787               |             |            |             |           |
| [7298]ENERGY: 12630000 | 3249.1089   | 5361.9369  | 5450.3685   |           |
| 319.9925               | -14311.2206 | -1720.3435 | 0.0000      | 0.0000    |
| 7833.2067              | 6183.0493   | 306.3177   | -1650.1574  | 6241.4220 |
| 308.5744               | 198.1484    | 31.0866    | 511540.4688 | -17.0223  |
| -17.0375               |             |            |             |           |
| [7334]ENERGY: 12640000 | 3324.7624   | 5333.9786  | 5424.9891   |           |
| 329.2035               | -14371.2046 | -1756.4614 | 0.0000      | 0.0000    |
| 7892.8023              | 6178.0698   | 308.6482   | -1714.7324  | 6241.5163 |
| 308.6298               | -253.5543   | -206.7366  | 511540.4688 | -18.5688  |
| -18.5669               |             |            |             |           |
| [7384]ENERGY: 12650000 | 3254.5087   | 5451.0248  | 5429.4713   |           |
| 303.4300               | -14335.0068 | -1754.7687 | 0.0000      | 0.0000    |
| 7832.3831              | 6181.0423   | 306.2855   | -1651.3408  | 6242.7869 |
| 308.7859               | -87.2744    | -80.0061   | 511540.4688 | -16.1846  |
| -16.1512               |             |            |             |           |
| [7420]ENERGY: 12660000 | 3275.9291   | 5281.0527  | 5450.4468   |           |
| 328.6016               | -14408.8014 | -1682.9842 | 0.0000      | 0.0000    |
| 7933.5672              | 6177.8118   | 310.2423   | -1755.7554  | 6241.5476 |
| 308.8719               | 100.1543    | 83.3565    | 511540.4688 | -12.3350  |
| -12.3478               |             |            |             |           |
| [7470]ENERGY: 12670000 | 3295.2988   | 5396.7917  | 5451.4991   |           |
| 336.7188               | -14411.7227 | -1748.1423 | 0.0000      | 0.0000    |
| 7856.3413              | 6176.7846   | 307.2223   | -1679.5566  | 6241.5394 |
| 308.7377               | -188.2662   | -234.8477  | 511540.4688 | -17.1195  |
| -17.1351               |             |            |             |           |
| [7506]ENERGY: 12680000 | 3305.1633   | 5364.0328  | 5457.5429   |           |
| 328.1869               | -14432.4598 | -1659.2178 | 0.0000      | 0.0000    |
| 7817.6488              | 6180.8972   | 305.7093   | -1636.7516  | 6241.5937 |
| 308.8441               | -11.2558    | -8.4797    | 511540.4688 | -15.1727  |
| -15.1676               |             |            |             |           |
| [7556]ENERGY: 12690000 | 3231.6274   | 5343.0706  | 5460.2403   |           |
| 353.1679               | -14387.0838 | -1687.7613 | 0.0000      | 0.0000    |
| 7865.2449              | 6178.5061   | 307.5705   | -1686.7388  | 6241.8750 |
| 308.9389               | 264.3761    | 129.4509   | 511540.4688 | -19.8379  |
| -19.8471               |             |            |             |           |
| [7595]ENERGY: 12700000 | 3201.8186   | 5324.4590  | 5466.3549   |           |
| 337.0855               | -14380.8318 | -1686.6051 | 0.0000      | 0.0000    |
| 7913.2824              | 6175.5635   | 309.4490   | -1737.7189  | 6241.6730 |
| 309.0123               | 14.4705     | 45.6179    | 511540.4688 | -17.8525  |
| -17.8767               |             |            |             |           |
| [7645]ENERGY: 12710000 | 3318.0654   | 5397.7641  | 5490.9228   |           |
| 346.5978               | -14534.4069 | -1724.6378 | 0.0000      | 0.0000    |
| 7884.9298              | 6179.2353   | 308.3403   | -1705.6945  | 6242.0581 |
| 308.9737               | -199.3610   | -89.6346   | 511540.4688 | -17.8538  |
| -17.7970               |             |            |             |           |

## Supplementary Text 6

|                        |             |            |             |           |
|------------------------|-------------|------------|-------------|-----------|
| [7681]ENERGY: 12720000 | 3283.8166   | 5424.1596  | 5411.8031   |           |
| 308.3580               | -14374.5927 | -1735.9772 | 0.0000      | 0.0000    |
| 7861.4960              | 6179.0633   | 307.4239   | -1682.4326  | 6244.1829 |
| 308.8188               | 118.9720    | 53.6109    | 511540.4688 | -18.3958  |
| -18.4257               |             |            |             |           |
| [7731]ENERGY: 12730000 | 3251.8434   | 5296.6409  | 5437.4304   |           |
| 303.9817               | -14413.3136 | -1608.9960 | 0.0000      | 0.0000    |
| 7914.0563              | 6181.6430   | 309.4793   | -1732.4133  | 6244.2770 |
| 309.0167               | 238.7029    | 279.8512   | 511540.4688 | -19.3809  |
| -19.3700               |             |            |             |           |
| [7767]ENERGY: 12740000 | 3302.0351   | 5327.5803  | 5433.1552   |           |
| 338.3922               | -14429.3047 | -1677.6132 | 0.0000      | 0.0000    |
| 7885.6845              | 6179.9295   | 308.3698   | -1705.7550  | 6243.3983 |
| 308.8082               | 110.6558    | 48.8019    | 511540.4688 | -21.1381  |
| -21.1422               |             |            |             |           |
| [7817]ENERGY: 12750000 | 3355.8983   | 5296.5061  | 5399.0761   |           |
| 328.3848               | -14427.1000 | -1677.5492 | 0.0000      | 0.0000    |
| 7905.1676              | 6180.3836   | 309.1317   | -1724.7840  | 6243.5492 |
| 308.8946               | 48.9943     | -15.6326   | 511540.4688 | -22.1204  |
| -22.1314               |             |            |             |           |
| [7853]ENERGY: 12760000 | 3235.2848   | 5323.4235  | 5479.6881   |           |
| 345.8794               | -14345.6668 | -1718.8214 | 0.0000      | 0.0000    |
| 7862.9954              | 6182.7830   | 307.4826   | -1680.2124  | 6244.5357 |
| 309.1499               | -66.1155    | -62.4341   | 511540.4688 | -14.5742  |
| -14.5592               |             |            |             |           |
| [7903]ENERGY: 12770000 | 3306.4368   | 5415.1160  | 5479.7730   |           |
| 327.6854               | -14405.8844 | -1756.1615 | 0.0000      | 0.0000    |
| 7817.6865              | 6184.6518   | 305.7108   | -1633.0347  | 6244.8882 |
| 309.0859               | -8.0103     | -53.4055   | 511540.4688 | -23.0497  |
| -23.0476               |             |            |             |           |
| [7939]ENERGY: 12780000 | 3286.7529   | 5313.8808  | 5435.9938   |           |
| 320.7603               | -14348.7254 | -1752.3088 | 0.0000      | 0.0000    |
| 7923.6228              | 6179.9762   | 309.8534   | -1743.6466  | 6245.0388 |
| 308.8517               | -145.8158   | -103.4721  | 511540.4688 | -15.5473  |
| -15.5404               |             |            |             |           |
| [7989]ENERGY: 12790000 | 3266.5397   | 5320.4000  | 5464.7243   |           |
| 307.5662               | -14345.7143 | -1725.7482 | 0.0000      | 0.0000    |
| 7892.0171              | 6179.7849   | 308.6175   | -1712.2322  | 6245.5901 |
| 308.7762               | 27.9265     | -1.2484    | 511540.4688 | -16.4856  |
| -16.4933               |             |            |             |           |
| [8028]ENERGY: 12800000 | 3277.9731   | 5398.6267  | 5404.4703   |           |
| 334.9941               | -14411.4215 | -1710.9957 | 0.0000      | 0.0000    |
| 7887.1843              | 6180.8313   | 308.4285   | -1706.3529  | 6245.1739 |
| 308.6668               | -103.1412   | -111.1501  | 511540.4688 | -16.1524  |
| -16.1580               |             |            |             |           |
| [8078]ENERGY: 12810000 | 3208.7553   | 5389.1977  | 5444.5754   |           |
| 302.0284               | -14350.5115 | -1682.4620 | 0.0000      | 0.0000    |
| 7871.4641              | 6183.0475   | 307.8137   | -1688.4166  | 6245.1801 |
| 308.8722               | 179.4655    | 129.1969   | 511540.4688 | -17.5045  |
| -17.5010               |             |            |             |           |
| [8114]ENERGY: 12820000 | 3206.5577   | 5302.8125  | 5436.4313   |           |
| 322.2481               | -14309.9944 | -1710.4009 | 0.0000      | 0.0000    |
| 7934.1437              | 6181.7981   | 310.2648   | -1752.3456  | 6245.2102 |
| 308.8847               | 192.6534    | 189.5969   | 511540.4688 | -16.7391  |

Supplementary Text 6

-16.7460  
 [8164]ENERGY: 12830000      3259.4655      5440.2787      5449.1036  
 299.4907      -14366.4066      -1736.0244      0.0000      0.0000  
 7835.8879      6181.7955      306.4225      -1654.0924      6245.9981  
 308.9091      16.9313      52.8944      511540.4688      -17.8135  
 -17.7893  
 [8200]ENERGY: 12840000      3233.5614      5440.2762      5368.2403  
 357.8915      -14353.8075      -1732.5000      0.0000      0.0000  
 7869.5129      6183.1747      307.7374      -1686.3382      6245.8750  
 308.7147      146.5044      -6.4306      511540.4688      -18.7059  
 -18.7190  
 [8250]ENERGY: 12850000      3255.2771      5383.1063      5447.3580  
 315.8758      -14307.3434      -1830.3943      0.0000      0.0000  
 7918.3742      6182.2538      309.6481      -1736.1203      6246.1088  
 308.5945      -59.6883      -151.5708      511540.4688      -12.4890  
 -12.5001  
 [8286]ENERGY: 12860000      3294.1057      5389.6953      5407.6363  
 297.3801      -14351.9756      -1733.8944      0.0000      0.0000  
 7880.9106      6183.8579      308.1831      -1697.0526      6245.3584  
 308.6914      -75.6666      -89.5073      511540.4688      -17.0803  
 -17.0586  
 [8336]ENERGY: 12870000      3265.2774      5290.8317      5454.4955  
 330.7366      -14366.9835      -1694.9167      0.0000      0.0000  
 7900.9981      6180.4391      308.9687      -1720.5590      6246.3444  
 308.8210      -7.4336      -100.1991      511540.4688      -13.5970  
 -13.6280  
 [8372]ENERGY: 12880000      3302.9289      5363.4584      5417.1221  
 316.5754      -14498.4558      -1663.6426      0.0000      0.0000  
 7945.1299      6183.1163      310.6944      -1762.0136      6247.4243  
 308.8720      107.7431      44.4459      511540.4688      -13.7334  
 -13.7329  
 [8422]ENERGY: 12890000      3244.2521      5380.3226      5474.2586  
 306.5553      -14442.9147      -1718.3157      0.0000      0.0000  
 7937.7636      6181.9217      310.4064      -1755.8418      6246.6727  
 308.7071      41.5874      -16.3328      511540.4688      -19.9797  
 -19.9389  
 [8461]ENERGY: 12900000      3261.4352      5309.5705      5427.0128  
 347.5859      -14352.5498      -1674.2891      0.0000      0.0000  
 7866.0615      6184.8271      307.6025      -1681.2344      6245.8086  
 308.6881      18.5636      -73.7127      511540.4688      -16.3386  
 -16.3669  
 [8511]ENERGY: 12910000      3246.9712      5278.0980      5479.6139  
 348.3387      -14316.0214      -1726.7036      0.0000      0.0000  
 7871.3632      6181.6602      307.8098      -1689.7031      6246.7260  
 308.8765      -5.8141      -16.8227      511540.4688      -18.0126  
 -17.9967  
 [8547]ENERGY: 12920000      3320.0581      5358.0392      5479.7740  
 323.7298      -14543.0357      -1642.3598      0.0000      0.0000  
 7886.6710      6182.8765      308.4084      -1703.7945      6245.5740  
 308.7791      -17.3272      146.5948      511540.4688      -15.4171  
 -15.4140  
 [8597]ENERGY: 12930000      3236.2573      5406.7765      5485.5199  
 329.5422      -14441.2731      -1631.3094      0.0000      0.0000  
 7799.3423      6184.8557      304.9934      -1614.4866      6246.4112



## Supplementary Text 6

|                        |             |            |             |           |
|------------------------|-------------|------------|-------------|-----------|
| 308.7428               | 345.8971    | 293.3449   | 511540.4688 | -16.0348  |
| -16.0634               |             |            |             |           |
| [8633]ENERGY: 12940000 | 3256.9482   | 5331.4726  | 5427.2667   |           |
| 327.9983               | -14354.6896 | -1669.5923 | 0.0000      | 0.0000    |
| 7863.9015              | 6183.3055   | 307.5180   | -1680.5960  | 6246.8469 |
| 308.9329               | -2.3639     | -94.1983   | 511540.4688 | -14.8318  |
| -14.8298               |             |            |             |           |
| [8683]ENERGY: 12950000 | 3253.3240   | 5443.3159  | 5450.0883   |           |
| 337.0845               | -14301.5668 | -1822.0149 | 0.0000      | 0.0000    |
| 7823.8055              | 6184.0365   | 305.9500   | -1639.7690  | 6247.5617 |
| 308.9733               | -334.4582   | -250.6407  | 511540.4688 | -14.2020  |
| -14.1834               |             |            |             |           |
| [8719]ENERGY: 12960000 | 3247.3785   | 5394.8673  | 5461.3277   |           |
| 338.0594               | -14357.8140 | -1753.0654 | 0.0000      | 0.0000    |
| 7856.7125              | 6187.4660   | 307.2369   | -1669.2465  | 6247.9987 |
| 309.0565               | 24.9882     | -24.9809   | 511540.4688 | -11.9150  |
| -11.9286               |             |            |             |           |
| [8769]ENERGY: 12970000 | 3260.4950   | 5263.2880  | 5464.3162   |           |
| 295.8803               | -14333.5453 | -1684.1979 | 0.0000      | 0.0000    |
| 7917.7212              | 6183.9576   | 309.6226   | -1733.7637  | 6246.8957 |
| 308.9239               | -93.0672    | -49.2096   | 511540.4688 | -15.3700  |
| -15.3554               |             |            |             |           |
| [8805]ENERGY: 12980000 | 3283.4075   | 5296.0654  | 5447.1647   |           |
| 327.2815               | -14339.5573 | -1728.9367 | 0.0000      | 0.0000    |
| 7898.0882              | 6183.5133   | 308.8549   | -1714.5749  | 6246.7870 |
| 308.9985               | -60.7418    | -2.2558    | 511540.4688 | -11.8794  |
| -11.8778               |             |            |             |           |
| [8855]ENERGY: 12990000 | 3289.9186   | 5457.3884  | 5395.7942   |           |
| 337.8182               | -14452.5313 | -1720.3594 | 0.0000      | 0.0000    |
| 7874.2793              | 6182.3081   | 307.9238   | -1691.9712  | 6248.3154 |
| 309.1249               | -68.6930    | -78.1943   | 511540.4688 | -12.0007  |
| -12.0144               |             |            |             |           |
| [8894]ENERGY: 13000000 | 3273.1683   | 5463.8807  | 5434.5188   |           |
| 307.3344               | -14459.3818 | -1748.4318 | 0.0000      | 0.0000    |
| 7914.0893              | 6185.1779   | 309.4806   | -1728.9114  | 6249.1934 |
| 308.9285               | 40.0229     | -79.4341   | 511540.4688 | -15.4609  |
| -15.4753               |             |            |             |           |
| [8944]ENERGY: 13010000 | 3291.3904   | 5333.9309  | 5416.5591   |           |
| 349.0685               | -14362.1254 | -1725.3570 | 0.0000      | 0.0000    |
| 7880.1320              | 6183.5984   | 308.1527   | -1696.5336  | 6248.2643 |
| 308.9763               | -26.6411    | 56.3684    | 511540.4688 | -15.1441  |
| -15.1249               |             |            |             |           |
| [8980]ENERGY: 13020000 | 3236.1205   | 5425.4485  | 5470.6160   |           |
| 328.8491               | -14388.2757 | -1737.1401 | 0.0000      | 0.0000    |
| 7848.5926              | 6184.2110   | 306.9193   | -1664.3816  | 6249.4813 |
| 309.1742               | 12.2174     | 74.3711    | 511540.4688 | -11.1025  |
| -11.1205               |             |            |             |           |
| [9030]ENERGY: 13030000 | 3269.4958   | 5300.7914  | 5434.7422   |           |
| 317.7295               | -14445.1921 | -1644.5257 | 0.0000      | 0.0000    |
| 7952.1378              | 6185.1789   | 310.9685   | -1766.9589  | 6248.9590 |
| 308.8928               | -71.3157    | -69.9795   | 511540.4688 | -16.2253  |
| -16.2184               |             |            |             |           |
| [9066]ENERGY: 13040000 | 3219.0841   | 5354.3105  | 5529.9156   |           |
| 314.2086               | -14371.6652 | -1673.6174 | 0.0000      | 0.0000    |

## Supplementary Text 6

|                        |             |            |             |           |
|------------------------|-------------|------------|-------------|-----------|
| 7812.9210              | 6185.1571   | 305.5244   | -1627.7639  | 6249.5294 |
| 308.9165               | 294.1176    | 211.4465   | 511540.4688 | -16.9303  |
| -16.9292               |             |            |             |           |
| [9116]ENERGY: 13050000 | 3331.1612   | 5303.9491  | 5436.2843   |           |
| 327.8328               | -14386.4365 | -1762.1810 | 0.0000      | 0.0000    |
| 7937.8104              | 6188.4202   | 310.4082   | -1749.3902  | 6250.0324 |
| 308.8980               | -123.7033   | -152.0937  | 511540.4688 | -22.0011  |
| -21.9949               |             |            |             |           |
| [9152]ENERGY: 13060000 | 3279.5214   | 5300.4580  | 5453.8228   |           |
| 312.6367               | -14314.4059 | -1697.2511 | 0.0000      | 0.0000    |
| 7853.4600              | 6188.2419   | 307.1097   | -1665.2181  | 6249.3963 |
| 308.8751               | -244.9099   | -176.8813  | 511540.4688 | -21.1768  |
| -21.1841               |             |            |             |           |
| [9202]ENERGY: 13070000 | 3244.2150   | 5376.1633  | 5385.6666   |           |
| 327.0836               | -14436.5873 | -1691.9074 | 0.0000      | 0.0000    |
| 7982.6098              | 6187.2436   | 312.1601   | -1795.3662  | 6249.7917 |
| 308.8158               | -59.0330    | -89.6742   | 511540.4688 | -23.6302  |
| -23.6231               |             |            |             |           |
| [9238]ENERGY: 13080000 | 3214.8338   | 5260.1709  | 5434.6317   |           |
| 297.9058               | -14285.5704 | -1657.8135 | 0.0000      | 0.0000    |
| 7920.2995              | 6184.4577   | 309.7234   | -1735.8418  | 6249.1616 |
| 308.9997               | 217.0000    | 151.4179   | 511540.4688 | -20.2971  |
| -20.2897               |             |            |             |           |
| [9288]ENERGY: 13090000 | 3250.3341   | 5352.1184  | 5462.3806   |           |
| 308.3723               | -14415.7634 | -1717.6770 | 0.0000      | 0.0000    |
| 7943.9668              | 6183.7317   | 310.6489   | -1760.2351  | 6249.9194 |
| 308.8521               | 92.3560     | 52.5118    | 511540.4688 | -27.0559  |
| -27.0356               |             |            |             |           |
| [9327]ENERGY: 13100000 | 3356.7322   | 5406.6068  | 5401.3641   |           |
| 327.8843               | -14414.5179 | -1717.8590 | 0.0000      | 0.0000    |
| 7832.0650              | 6192.2757   | 306.2730   | -1639.7894  | 6249.8313 |
| 309.1033               | -226.4904   | -108.0722  | 511540.4688 | -20.1581  |
| -20.1550               |             |            |             |           |
| [9377]ENERGY: 13110000 | 3368.8320   | 5433.7411  | 5436.1465   |           |
| 311.6000               | -14374.8902 | -1759.5098 | 0.0000      | 0.0000    |
| 7773.9101              | 6189.8297   | 303.9989   | -1584.0805  | 6251.0966 |
| 309.1903               | -246.0613   | -187.4225  | 511540.4688 | -21.6242  |
| -21.6565               |             |            |             |           |
| [9413]ENERGY: 13120000 | 3333.5901   | 5332.7315  | 5408.7439   |           |
| 306.2115               | -14401.7558 | -1627.6099 | 0.0000      | 0.0000    |
| 7837.2500              | 6189.1611   | 306.4758   | -1648.0889  | 6251.2722 |
| 308.9474               | 133.1781    | 114.6108   | 511540.4688 | -22.7132  |
| -22.7218               |             |            |             |           |
| [9463]ENERGY: 13130000 | 3242.9638   | 5332.5073  | 5396.3957   |           |
| 309.3326               | -14328.9811 | -1736.9208 | 0.0000      | 0.0000    |
| 7971.2297              | 6186.5273   | 311.7151   | -1784.7024  | 6252.0682 |
| 309.0180               | -96.7273    | -109.7469  | 511540.4688 | -20.9136  |
| -20.8985               |             |            |             |           |
| [9499]ENERGY: 13140000 | 3269.8584   | 5389.2697  | 5359.7047   |           |
| 328.6398               | -14383.9124 | -1636.3950 | 0.0000      | 0.0000    |
| 7860.8917              | 6188.0567   | 307.4003   | -1672.8350  | 6250.8568 |
| 308.9816               | -41.0850    | -38.6685   | 511540.4688 | -18.2934  |
| -18.2784               |             |            |             |           |
| [9549]ENERGY: 13150000 | 3311.0463   | 5440.3557  | 5418.9043   |           |

## Supplementary Text 6

|                        |             |            |             |           |
|------------------------|-------------|------------|-------------|-----------|
| 321.9441               | -14348.1413 | -1764.2514 | 0.0000      | 0.0000    |
| 7810.4546              | 6190.3124   | 305.4279   | -1620.1423  | 6252.2295 |
| 308.9214               | 47.7806     | -135.4874  | 511540.4688 | -23.7704  |
| -23.7908               |             |            |             |           |
| [9585]ENERGY: 13160000 | 3276.1191   | 5349.3639  | 5369.8298   |           |
| 324.9492               | -14388.1484 | -1718.4683 | 0.0000      | 0.0000    |
| 7970.5386              | 6184.1840   | 311.6880   | -1786.3546  | 6250.8824 |
| 308.7233               | -138.7833   | -198.4270  | 511540.4688 | -23.3840  |
| -23.3683               |             |            |             |           |
| [9635]ENERGY: 13170000 | 3303.1147   | 5468.9051  | 5419.2940   |           |
| 322.2400               | -14453.3520 | -1721.4459 | 0.0000      | 0.0000    |
| 7845.9810              | 6184.7368   | 306.8172   | -1661.2441  | 6250.3186 |
| 308.7680               | -114.4544   | 51.8267    | 511540.4688 | -22.5634  |
| -22.5776               |             |            |             |           |
| [9671]ENERGY: 13180000 | 3310.6398   | 5401.1862  | 5431.6634   |           |
| 310.5295               | -14409.4509 | -1744.6720 | 0.0000      | 0.0000    |
| 7887.1393              | 6187.0354   | 308.4267   | -1700.1039  | 6249.7326 |
| 309.0786               | -68.2658    | -74.2775   | 511540.4688 | -13.7833  |
| -13.7845               |             |            |             |           |
| [9721]ENERGY: 13190000 | 3246.7208   | 5378.7640  | 5417.3576   |           |
| 308.9421               | -14312.1176 | -1684.6287 | 0.0000      | 0.0000    |
| 7835.6618              | 6190.7000   | 306.4137   | -1644.9617  | 6253.0078 |
| 308.9732               | 220.1561    | 22.9269    | 511540.4688 | -16.4754  |
| -16.4880               |             |            |             |           |
| [9760]ENERGY: 13200000 | 3241.2844   | 5392.2088  | 5421.5166   |           |
| 323.8713               | -14352.5405 | -1771.0781 | 0.0000      | 0.0000    |
| 7931.5682              | 6186.8308   | 310.1641   | -1744.7375  | 6252.9508 |
| 309.0511               | 74.4030     | 91.8930    | 511540.4688 | -16.3799  |
| -16.3503               |             |            |             |           |
| [9810]ENERGY: 13210000 | 3277.7741   | 5391.9683  | 5401.5535   |           |
| 322.0722               | -14384.3623 | -1767.7281 | 0.0000      | 0.0000    |
| 7949.9956              | 6191.2733   | 310.8847   | -1758.7223  | 6253.2077 |
| 309.1266               | 56.7412     | 34.7705    | 511540.4688 | -17.9717  |
| -17.9904               |             |            |             |           |
| [9846]ENERGY: 13220000 | 3255.7326   | 5383.0657  | 5443.6819   |           |
| 324.8404               | -14263.9454 | -1806.6732 | 0.0000      | 0.0000    |
| 7859.4945              | 6196.1966   | 307.3457   | -1663.2979  | 6253.5184 |
| 309.0510               | -76.5465    | -53.2187   | 511540.4688 | -19.0387  |
| -19.0380               |             |            |             |           |
| [9896]ENERGY: 13230000 | 3236.7281   | 5411.4998  | 5417.3348   |           |
| 342.1143               | -14368.5717 | -1733.6357 | 0.0000      | 0.0000    |
| 7885.6002              | 6191.0697   | 308.3665   | -1694.5305  | 6253.5567 |
| 309.0417               | -65.5963    | -20.2189   | 511540.4688 | -18.2903  |
| -18.2576               |             |            |             |           |
| [9932]ENERGY: 13240000 | 3199.2901   | 5416.9159  | 5410.3331   |           |
| 328.0464               | -14376.3261 | -1715.7241 | 0.0000      | 0.0000    |
| 7925.3158              | 6187.8511   | 309.9196   | -1737.4647  | 6253.0764 |
| 309.1219               | 110.5102    | 154.4966   | 511540.4688 | -18.5887  |
| -18.6133               |             |            |             |           |
| [9982]ENERGY: 13250000 | 3203.8646   | 5403.8685  | 5473.2206   |           |
| 327.9582               | -14348.5502 | -1758.5504 | 0.0000      | 0.0000    |
| 7887.6749              | 6189.4863   | 308.4476   | -1698.1887  | 6254.5060 |
| 309.0335               | -37.0815    | 10.4397    | 511540.4688 | -13.3125  |
| -13.3392               |             |            |             |           |

## Supplementary Text 6

|                         |             |            |             |
|-------------------------|-------------|------------|-------------|
| [10018]ENERGY: 13260000 | 3283.9713   | 5376.6961  | 5382.5780   |
| 300.2396                | -14338.0473 | -1730.0177 | 0.0000      |
| 7916.7250               | 6192.1449   | 309.5837   | -1724.5801  |
| 308.8686                | 5.9622      | -177.6180  | 511540.4688 |
| -15.9892                |             |            | -15.9962    |
| [10068]ENERGY: 13270000 | 3277.1536   | 5302.1226  | 5448.8288   |
| 353.9570                | -14347.4134 | -1764.4541 | 0.0000      |
| 7923.7867               | 6193.9811   | 309.8598   | -1729.8056  |
| 309.0679                | -5.8108     | -96.1088   | 511540.4688 |
| -16.0955                |             |            | -16.1098    |
| [10104]ENERGY: 13280000 | 3285.3981   | 5291.4762  | 5439.1718   |
| 288.2942                | -14306.4959 | -1761.5791 | 0.0000      |
| 7953.0688               | 6189.3341   | 311.0049   | -1763.7347  |
| 309.0505                | -48.1988    | -82.7824   | 511540.4688 |
| -19.9491                |             |            | -19.9328    |
| [10154]ENERGY: 13290000 | 3268.1520   | 5353.4264  | 5443.0366   |
| 325.2513                | -14362.6090 | -1723.8072 | 0.0000      |
| 7889.1638               | 6192.6140   | 308.5059   | -1696.5498  |
| 308.9772                | -22.0658    | 56.9667    | 511540.4688 |
| -17.8722                |             |            | -17.8987    |
| [10193]ENERGY: 13300000 | 3204.8401   | 5309.2186  | 5502.0105   |
| 319.5650                | -14319.2213 | -1805.0227 | 0.0000      |
| 7977.9077               | 6189.2979   | 311.9762   | -1788.6098  |
| 309.0125                | 121.7015    | 13.2647    | 511540.4688 |
| -17.0741                |             |            | -17.0544    |
| [10243]ENERGY: 13310000 | 3338.5042   | 5312.9203  | 5444.0782   |
| 321.9289                | -14340.7175 | -1723.8485 | 0.0000      |
| 7839.6392               | 6192.5047   | 306.5692   | -1647.1345  |
| 308.9661                | -239.0425   | -129.1730  | 511540.4688 |
| -18.8062                |             |            | -18.8090    |
| [10279]ENERGY: 13320000 | 3272.5413   | 5276.3863  | 5443.9359   |
| 316.1451                | -14311.9414 | -1793.6598 | 0.0000      |
| 7988.2036               | 6191.6108   | 312.3788   | -1796.5927  |
| 309.0156                | 126.5214    | -91.6789   | 511540.4688 |
| -20.3645                |             |            | -20.3507    |
| [10329]ENERGY: 13330000 | 3301.7960   | 5464.1129  | 5432.4850   |
| 305.4801                | -14352.8749 | -1690.6704 | 0.0000      |
| 7734.2671               | 6194.5958   | 302.4486   | -1539.6713  |
| 309.1916                | -1.7217     | 4.3833     | 511540.4688 |
| -19.7077                |             |            | -19.7456    |
| [10365]ENERGY: 13340000 | 3217.4453   | 5355.5961  | 5445.6957   |
| 340.9011                | -14377.6644 | -1703.7948 | 0.0000      |
| 7915.5030               | 6193.6820   | 309.5359   | -1721.8211  |
| 309.0385                | 59.4149     | 19.0131    | 511540.4688 |
| -15.1778                |             |            | -15.1654    |
| [10415]ENERGY: 13350000 | 3334.8352   | 5324.1627  | 5446.5890   |
| 313.7564                | -14328.5030 | -1719.4666 | 0.0000      |
| 7825.9898               | 6197.3633   | 306.0355   | -1628.6265  |
| 309.0420                | 142.7148    | 109.2486   | 511540.4688 |
| -17.0578                |             |            | -17.0579    |
| [10451]ENERGY: 13360000 | 3260.4485   | 5339.7440  | 5431.5257   |
| 349.3103                | -14287.0676 | -1758.7367 | 0.0000      |
| 7863.8269               | 6199.0511   | 307.5151   | -1664.7758  |
| 308.9415                | -61.1013    | -134.3592  | 511540.4688 |
|                         |             |            | -18.0629    |

## Supplementary Text 6

-18.0616  
[10501]ENERGY: 13370000 3320.2269 5290.0687 5423.3679  
325.4871 -14328.1398 -1772.3410 0.0000 0.0000  
7934.8819 6193.5516 310.2937 -1741.3302 6257.0364  
308.9535 209.6189 107.8601 511540.4688 -15.6961  
-15.7113  
[10537]ENERGY: 13380000 3195.1126 5234.9564 5431.6143  
338.5291 -14347.9175 -1691.5745 0.0000 0.0000  
8028.5325 6189.2530 313.9559 -1839.2795 6257.6324  
309.1847 40.7910 -26.5209 511540.4688 -17.7242  
-17.7151  
[10587]ENERGY: 13390000 3189.7103 5327.9133 5431.6293  
341.2333 -14295.4902 -1725.3546 0.0000 0.0000  
7921.6346 6191.2759 309.7756 -1730.3587 6257.9909  
309.0978 -15.5045 16.3797 511540.4688 -12.9711  
-12.9451  
[10626]ENERGY: 13400000 3302.7814 5366.3378 5408.5587  
322.5893 -14328.9519 -1718.2594 0.0000 0.0000  
7841.5455 6194.6014 306.6438 -1646.9441 6257.4267  
308.8482 5.0913 -16.5383 511540.4688 -17.7239  
-17.7432  
[10676]ENERGY: 13410000 3263.7071 5367.6324 5430.7155  
325.0176 -14349.2403 -1759.6403 0.0000 0.0000  
7914.1173 6192.3092 309.4817 -1721.8081 6257.6592  
309.0911 -108.0995 -125.0204 511540.4688 -13.4351  
-13.4377  
[10712]ENERGY: 13420000 3245.9088 5378.5125 5433.5091  
332.3069 -14403.4992 -1687.7986 0.0000 0.0000  
7895.9680 6194.9075 308.7720 -1701.0605 6258.1218  
308.9728 -38.9463 -51.5904 511540.4688 -16.2554  
-16.2656  
[10762]ENERGY: 13430000 3258.0481 5394.4792 5452.7125  
325.4278 -14434.9442 -1714.1968 0.0000 0.0000  
7913.5805 6195.1071 309.4607 -1718.4734 6257.9411  
308.9609 52.4486 30.9044 511540.4688 -14.2456  
-14.2311  
[10798]ENERGY: 13440000 3258.5216 5471.6477 5438.2186  
342.8946 -14398.3866 -1731.9522 0.0000 0.0000  
7812.2527 6193.1963 305.4983 -1619.0563 6258.0627  
309.0808 16.4059 -36.6122 511540.4688 -14.0532  
-14.0480  
[10848]ENERGY: 13450000 3302.5142 5313.2156 5478.0931  
299.0285 -14356.9049 -1701.5096 0.0000 0.0000  
7860.6470 6195.0838 307.3907 -1665.5631 6258.0289  
308.8436 210.0724 78.6020 511540.4688 -19.3062  
-19.3374  
[10884]ENERGY: 13460000 3273.0504 5246.7739 5447.8670  
333.7425 -14333.7935 -1705.2209 0.0000 0.0000  
7933.5632 6195.9825 310.2421 -1737.5807 6258.6248  
308.8616 25.6209 80.6450 511540.4688 -12.4899  
-12.4698  
[10934]ENERGY: 13470000 3255.2642 5373.6764 5421.4437  
325.9197 -14387.6992 -1668.3562 0.0000 0.0000  
7876.4253 6196.6739 308.0077 -1679.7514 6258.1262

## Supplementary Text 6

|                         |             |            |             |           |
|-------------------------|-------------|------------|-------------|-----------|
| 308.9384                | 67.1736     | -94.0797   | 511540.4688 | -12.6847  |
| -12.7123                |             |            |             |           |
| [10970]ENERGY: 13480000 | 3249.7252   | 5421.0800  | 5450.2337   |           |
| 316.7013                | -14429.6429 | -1720.5529 | 0.0000      | 0.0000    |
| 7907.1205               | 6194.6648   | 309.2081   | -1712.4557  | 6258.0805 |
| 308.8820                | 34.8574     | -82.7609   | 511540.4688 | -18.1891  |
| -18.1682                |             |            |             |           |
| [11020]ENERGY: 13490000 | 3271.2422   | 5443.1528  | 5491.6125   |           |
| 313.5288                | -14432.0386 | -1721.6671 | 0.0000      | 0.0000    |
| 7830.1233               | 6195.9538   | 306.1971   | -1634.1695  | 6257.6136 |
| 309.0162                | -60.0533    | -79.6609   | 511540.4688 | -15.4009  |
| -15.3799                |             |            |             |           |
| [11059]ENERGY: 13500000 | 3226.3166   | 5396.7629  | 5458.7289   |           |
| 314.5537                | -14377.6625 | -1720.8902 | 0.0000      | 0.0000    |
| 7892.4123               | 6190.2218   | 308.6329   | -1702.1905  | 6258.3669 |
| 309.0202                | 201.1535    | 75.5953    | 511540.4688 | -17.6241  |
| -17.6537                |             |            |             |           |
| [11109]ENERGY: 13510000 | 3218.7827   | 5344.9719  | 5462.3356   |           |
| 323.0132                | -14360.8367 | -1679.3089 | 0.0000      | 0.0000    |
| 7884.1000               | 6193.0578   | 308.3079   | -1691.0422  | 6256.3137 |
| 309.0669                | -78.6560    | -84.2032   | 511540.4688 | -15.2165  |
| -15.2056                |             |            |             |           |
| [11145]ENERGY: 13520000 | 3238.0640   | 5370.1322  | 5481.3602   |           |
| 339.2075                | -14417.2973 | -1684.3770 | 0.0000      | 0.0000    |
| 7866.8499               | 6193.9395   | 307.6333   | -1672.9104  | 6257.4093 |
| 309.0746                | 114.8044    | 109.7969   | 511540.4688 | -18.3811  |
| -18.3612                |             |            |             |           |
| [11195]ENERGY: 13530000 | 3303.0050   | 5376.3135  | 5424.4234   |           |
| 304.9683                | -14387.4233 | -1795.0690 | 0.0000      | 0.0000    |
| 7968.6192               | 6194.8371   | 311.6130   | -1773.7821  | 6257.3785 |
| 309.0612                | -12.3053    | -109.3357  | 511540.4688 | -15.7903  |
| -15.8113                |             |            |             |           |
| [11231]ENERGY: 13540000 | 3272.4423   | 5443.1060  | 5433.6543   |           |
| 334.3152                | -14378.7433 | -1785.5041 | 0.0000      | 0.0000    |
| 7872.8181               | 6192.0886   | 307.8667   | -1680.7295  | 6258.1008 |
| 309.0647                | 9.1115      | -62.7001   | 511540.4688 | -18.5950  |
| -18.6022                |             |            |             |           |
| [11281]ENERGY: 13550000 | 3271.2650   | 5310.5562  | 5441.0124   |           |
| 317.1483                | -14423.7276 | -1653.0199 | 0.0000      | 0.0000    |
| 7929.8799               | 6193.1144   | 310.0981   | -1736.7655  | 6256.6645 |
| 309.1093                | -36.9428    | 13.0521    | 511540.4688 | -15.4779  |
| -15.4582                |             |            |             |           |
| [11317]ENERGY: 13560000 | 3207.7417   | 5334.5352  | 5474.7571   |           |
| 321.5041                | -14326.2957 | -1786.6092 | 0.0000      | 0.0000    |
| 7966.0557               | 6191.6889   | 311.5127   | -1774.3668  | 6257.3356 |
| 309.0215                | 67.5621     | 35.5883    | 511540.4688 | -16.3168  |
| -16.3331                |             |            |             |           |
| [11367]ENERGY: 13570000 | 3256.1708   | 5385.3130  | 5450.6548   |           |
| 313.3571                | -14320.5299 | -1756.5674 | 0.0000      | 0.0000    |
| 7864.9202               | 6193.3186   | 307.5578   | -1671.6016  | 6257.3346 |
| 309.1405                | 238.1745    | 158.3454   | 511540.4688 | -13.8682  |
| -13.8681                |             |            |             |           |
| [11403]ENERGY: 13580000 | 3247.0710   | 5258.2465  | 5438.1288   |           |
| 319.4367                | -14370.5475 | -1668.9333 | 0.0000      | 0.0000    |

## Supplementary Text 6

|                         |             |            |             |           |
|-------------------------|-------------|------------|-------------|-----------|
| 7972.8364               | 6196.2385   | 311.7779   | -1776.5979  | 6256.9010 |
| 308.7959                | 147.3219    | 87.8730    | 511540.4688 | -14.2545  |
| -14.2428                |             |            |             |           |
| [11453]ENERGY: 13590000 | 3234.2756   | 5452.7354  | 5455.8857   |           |
| 313.9573                | -14433.6565 | -1762.9837 | 0.0000      | 0.0000    |
| 7927.4179               | 6187.6318   | 310.0018   | -1739.7861  | 6256.6176 |
| 309.0941                | -61.0409    | -136.6125  | 511540.4688 | -18.9226  |
| -18.9262                |             |            |             |           |
| [11492]ENERGY: 13600000 | 3306.6098   | 5393.4500  | 5458.2049   |           |
| 328.7318                | -14425.5364 | -1713.4700 | 0.0000      | 0.0000    |
| 7847.4596               | 6195.4498   | 306.8750   | -1652.0098  | 6257.4902 |
| 309.2872                | -62.8375    | -39.6787   | 511540.4688 | -16.9599  |
| -16.9510                |             |            |             |           |
| [11542]ENERGY: 13610000 | 3304.9838   | 5322.6480  | 5431.8575   |           |
| 345.6933                | -14364.1610 | -1747.9640 | 0.0000      | 0.0000    |
| 7900.1090               | 6193.1666   | 308.9339   | -1706.9424  | 6258.4142 |
| 309.1604                | 75.4568     | -42.0086   | 511540.4688 | -20.6891  |
| -20.6767                |             |            |             |           |
| [11578]ENERGY: 13620000 | 3304.5605   | 5383.9440  | 5422.8593   |           |
| 310.1798                | -14308.3697 | -1697.7866 | 0.0000      | 0.0000    |
| 7783.9398               | 6199.3271   | 304.3911   | -1584.6128  | 6258.3582 |
| 308.9458                | 121.1097    | 38.4691    | 511540.4688 | -17.6942  |
| -17.7267                |             |            |             |           |
| [11628]ENERGY: 13630000 | 3345.1345   | 5320.2035  | 5409.8853   |           |
| 325.6741                | -14317.6900 | -1750.9150 | 0.0000      | 0.0000    |
| 7865.0420               | 6197.3345   | 307.5626   | -1667.7075  | 6258.6766 |
| 309.1927                | -328.2054   | -262.1751  | 511540.4688 | -13.1744  |
| -13.1604                |             |            |             |           |
| [11664]ENERGY: 13640000 | 3250.3331   | 5296.4245  | 5434.5208   |           |
| 334.9905                | -14325.7995 | -1728.0607 | 0.0000      | 0.0000    |
| 7933.8497               | 6196.2585   | 310.2533   | -1737.5912  | 6260.4372 |
| 309.2038                | 103.0357    | 32.6224    | 511540.4688 | -18.0993  |
| -18.0834                |             |            |             |           |
| [11714]ENERGY: 13650000 | 3282.1323   | 5340.5350  | 5422.4098   |           |
| 331.1050                | -14436.7963 | -1666.6771 | 0.0000      | 0.0000    |
| 7920.9726               | 6193.6813   | 309.7498   | -1727.2913  | 6260.0623 |
| 308.9420                | -69.7013    | -48.5746   | 511540.4688 | -22.5646  |
| -22.5983                |             |            |             |           |
| [11750]ENERGY: 13660000 | 3321.4807   | 5349.0405  | 5467.0476   |           |
| 333.9259                | -14415.6525 | -1675.8790 | 0.0000      | 0.0000    |
| 7818.3685               | 6198.3317   | 305.7374   | -1620.0368  | 6261.3507 |
| 309.1295                | 130.7114    | 66.4683    | 511540.4688 | -19.6628  |
| -19.6573                |             |            |             |           |
| [11800]ENERGY: 13670000 | 3229.1330   | 5376.5301  | 5448.5015   |           |
| 317.1708                | -14393.8792 | -1715.1605 | 0.0000      | 0.0000    |
| 7932.8956               | 6195.1914   | 310.2160   | -1737.7043  | 6260.9459 |
| 309.0670                | 46.2950     | 13.6643    | 511540.4688 | -14.8398  |
| -14.8293                |             |            |             |           |
| [11836]ENERGY: 13680000 | 3293.1217   | 5373.9866  | 5409.8561   |           |
| 355.7572                | -14424.1623 | -1778.0040 | 0.0000      | 0.0000    |
| 7968.7002               | 6199.2553   | 311.6161   | -1769.4449  | 6262.7330 |
| 308.9317                | -2.8690     | -145.7440  | 511540.4688 | -20.4023  |
| -20.4365                |             |            |             |           |
| [11886]ENERGY: 13690000 | 3223.8259   | 5292.2233  | 5469.4703   |           |

## Supplementary Text 6

|                         |             |            |             |           |
|-------------------------|-------------|------------|-------------|-----------|
| 302.8026                | -14345.0649 | -1630.9385 | 0.0000      | 0.0000    |
| 7886.2745               | 6198.5931   | 308.3929   | -1687.6814  | 6261.7411 |
| 308.9547                | 155.9735    | 164.7895   | 511540.4688 | -18.4418  |
| -18.4000                |             |            |             |           |
| [11925]ENERGY: 13700000 | 3341.3964   | 5400.5512  | 5455.6971   |           |
| 326.5281                | -14414.0251 | -1738.3017 | 0.0000      | 0.0000    |
| 7821.6391               | 6193.4852   | 305.8653   | -1628.1539  | 6261.6336 |
| 308.9595                | -159.7281   | -162.5605  | 511540.4688 | -14.3063  |
| -14.2935                |             |            |             |           |
| [11975]ENERGY: 13710000 | 3304.4796   | 5291.0605  | 5471.0618   |           |
| 310.7340                | -14370.8437 | -1696.5797 | 0.0000      | 0.0000    |
| 7890.3677               | 6200.2802   | 308.5530   | -1690.0876  | 6263.2008 |
| 308.9317                | 126.8212    | 55.8279    | 511540.4688 | -19.3991  |
| -19.4272                |             |            |             |           |
| [12011]ENERGY: 13720000 | 3334.5238   | 5233.0479  | 5470.7026   |           |
| 300.8606                | -14233.1536 | -1787.4006 | 0.0000      | 0.0000    |
| 7882.6364               | 6201.2170   | 308.2506   | -1681.4194  | 6262.9593 |
| 309.0890                | 96.0054     | -2.8759    | 511540.4688 | -14.4847  |
| -14.4723                |             |            |             |           |
| [12061]ENERGY: 13730000 | 3207.3468   | 5383.2232  | 5438.3035   |           |
| 321.6546                | -14325.3936 | -1748.8808 | 0.0000      | 0.0000    |
| 7920.2808               | 6196.5344   | 309.7227   | -1723.7464  | 6263.0845 |
| 308.9989                | 212.0326    | 87.9208    | 511540.4688 | -15.9377  |
| -15.9475                |             |            |             |           |
| [12097]ENERGY: 13740000 | 3280.1236   | 5481.5952  | 5424.7434   |           |
| 316.4594                | -14358.8477 | -1812.0213 | 0.0000      | 0.0000    |
| 7865.3252               | 6197.3778   | 307.5737   | -1667.9475  | 6264.0261 |
| 309.0953                | -16.4954    | -33.8664   | 511540.4688 | -12.6683  |
| -12.6512                |             |            |             |           |
| [12147]ENERGY: 13750000 | 3256.0639   | 5350.6329  | 5464.7062   |           |
| 312.1126                | -14334.4593 | -1722.1088 | 0.0000      | 0.0000    |
| 7873.9043               | 6200.8517   | 307.9092   | -1673.0526  | 6263.7629 |
| 309.2530                | 60.7051     | -71.4846   | 511540.4688 | -12.3276  |
| -12.3266                |             |            |             |           |
| [12183]ENERGY: 13760000 | 3274.8676   | 5325.7593  | 5465.0865   |           |
| 326.0807                | -14452.8658 | -1652.5659 | 0.0000      | 0.0000    |
| 7913.9155               | 6200.2779   | 309.4738   | -1713.6376  | 6263.4306 |
| 309.1591                | 170.1654    | 108.1952   | 511540.4688 | -17.9124  |
| -17.9376                |             |            |             |           |
| [12233]ENERGY: 13770000 | 3423.4457   | 5379.3759  | 5399.0278   |           |
| 325.4402                | -14449.4764 | -1762.2863 | 0.0000      | 0.0000    |
| 7888.1032               | 6203.6300   | 308.4644   | -1684.4732  | 6264.2956 |
| 309.2336                | 99.5744     | -64.7452   | 511540.4688 | -14.5003  |
| -14.5084                |             |            |             |           |
| [12269]ENERGY: 13780000 | 3230.4619   | 5424.9932  | 5451.9446   |           |
| 329.0621                | -14417.3608 | -1745.7056 | 0.0000      | 0.0000    |
| 7926.4022               | 6199.7976   | 309.9621   | -1726.6046  | 6263.9633 |
| 309.2079                | 28.2100     | -85.5037   | 511540.4688 | -16.8757  |
| -16.8646                |             |            |             |           |
| [12319]ENERGY: 13790000 | 3305.9333   | 5341.9188  | 5507.5365   |           |
| 355.2592                | -14468.3446 | -1743.1561 | 0.0000      | 0.0000    |
| 7904.7923               | 6203.9394   | 309.1170   | -1700.8529  | 6264.7498 |
| 309.3583                | 239.4449    | 167.3659   | 511540.4688 | -11.5158  |
| -11.5081                |             |            |             |           |



## Supplementary Text 6

|                         |             |            |             |
|-------------------------|-------------|------------|-------------|
| [12358]ENERGY: 13800000 | 3274.8971   | 5321.6895  | 5424.7260   |
| 342.3285                | -14339.7519 | -1740.6686 | 0.0000      |
| 7914.8683               | 6198.0890   | 309.5110   | -1716.7793  |
| 309.3672                | -125.2163   | -110.0706  | 511540.4688 |
| -15.8611                |             |            | -15.8662    |
| [12408]ENERGY: 13810000 | 3292.8216   | 5298.1104  | 5487.9997   |
| 321.0214                | -14385.8498 | -1696.5243 | 0.0000      |
| 7885.2976               | 6202.8766   | 308.3547   | -1682.4211  |
| 309.3172                | -97.0767    | -72.4952   | 511540.4688 |
| -15.2937                |             |            | -15.2998    |
| [12444]ENERGY: 13820000 | 3266.3270   | 5289.2437  | 5441.6593   |
| 336.1584                | -14279.9239 | -1759.2814 | 0.0000      |
| 7907.1577               | 6201.3409   | 309.2095   | -1705.8168  |
| 309.3121                | -92.9132    | -131.4232  | 511540.4688 |
| -14.0379                |             |            | -14.0066    |
| [12494]ENERGY: 13830000 | 3237.0361   | 5267.4139  | 5422.1254   |
| 315.2389                | -14301.0476 | -1717.6323 | 0.0000      |
| 7978.4584               | 6201.5929   | 311.9977   | -1776.8656  |
| 309.3681                | -25.0851    | -108.4558  | 511540.4688 |
| -15.2230                |             |            | -15.2519    |
| [12530]ENERGY: 13840000 | 3268.2712   | 5377.0373  | 5410.7622   |
| 302.4205                | -14373.5992 | -1777.0012 | 0.0000      |
| 7990.6335               | 6198.5244   | 312.4738   | -1792.1091  |
| 309.4436                | -105.5795   | -122.7738  | 511540.4688 |
| -11.6975                |             |            | -11.6930    |
| [12580]ENERGY: 13850000 | 3292.5357   | 5287.9199  | 5438.5116   |
| 310.4432                | -14333.4532 | -1756.4149 | 0.0000      |
| 7963.7236               | 6203.2660   | 311.4215   | -1760.4576  |
| 309.3096                | 241.1342    | 49.8853    | 511540.4688 |
| -17.5948                |             |            | -17.5808    |
| [12616]ENERGY: 13860000 | 3296.3599   | 5283.6616  | 5457.6466   |
| 326.1150                | -14464.0221 | -1637.1650 | 0.0000      |
| 7940.3415               | 6202.9375   | 310.5072   | -1737.4040  |
| 309.2506                | 261.8477    | 254.9817   | 511540.4688 |
| -13.5831                |             |            | -13.5945    |
| [12666]ENERGY: 13870000 | 3237.8178   | 5438.9955  | 5406.0673   |
| 318.4064                | -14384.2820 | -1674.2877 | 0.0000      |
| 7858.4631               | 6201.1806   | 307.3053   | -1657.2825  |
| 309.2284                | 110.1420    | 110.4227   | 511540.4688 |
| -18.2861                |             |            | -18.2778    |
| [12702]ENERGY: 13880000 | 3266.4547   | 5362.1867  | 5465.8485   |
| 314.3743                | -14386.0917 | -1745.3730 | 0.0000      |
| 7926.6082               | 6204.0078   | 309.9701   | -1722.6005  |
| 309.3821                | 113.3975    | -1.5779    | 511540.4688 |
| -13.0251                |             |            | -13.0405    |
| [12752]ENERGY: 13890000 | 3306.2696   | 5376.7196  | 5430.9315   |
| 331.0341                | -14421.9596 | -1714.9542 | 0.0000      |
| 7892.0878               | 6200.1287   | 308.6202   | -1691.9592  |
| 309.5117                | -211.3120   | -150.4667  | 511540.4688 |
| -18.5992                |             |            | -18.6093    |
| [12791]ENERGY: 13900000 | 3336.1509   | 5393.7699  | 5392.7006   |
| 331.3130                | -14391.9481 | -1744.6032 | 0.0000      |
| 7883.6937               | 6201.0768   | 308.2920   | -1682.6169  |
| 309.5324                | -104.0964   | -52.0141   | 511540.4688 |
|                         |             |            | -13.2996    |

Supplementary Text 6

-13.3345  
 [12841]ENERGY: 13910000 3229.8258 5437.4647 5458.8040  
 319.5662 -14336.6992 -1787.1401 0.0000 0.0000  
 7881.6996 6203.5211 308.2140 -1678.1785 6265.6195  
 309.3023 123.9742 16.3841 511540.4688 -15.2126  
 -15.1927  
 [12877]ENERGY: 13920000 3298.5747 5354.3419 5453.9053  
 325.7933 -14367.0903 -1738.6244 0.0000 0.0000  
 7877.4741 6204.3746 308.0487 -1673.0995 6265.9692  
 309.3892 -130.1745 -160.5236 511540.4688 -11.2939  
 -11.3138  
 [12927]ENERGY: 13930000 3307.7108 5278.4255 5485.4543  
 316.2034 -14332.5404 -1718.5701 0.0000 0.0000  
 7865.7944 6202.4780 307.5920 -1663.3164 6265.9319  
 309.5892 -58.4978 -165.2744 511540.4688 -16.2288  
 -16.1949  
 [12963]ENERGY: 13940000 3291.7010 5382.4713 5448.6336  
 302.4091 -14340.4017 -1768.5824 0.0000 0.0000  
 7884.6311 6200.8620 308.3286 -1683.7691 6265.9166  
 309.4954 -14.0560 -63.8452 511540.4688 -17.4473  
 -17.4672  
 [13013]ENERGY: 13950000 3386.8119 5440.8611 5428.0049  
 326.3620 -14355.6159 -1809.0793 0.0000 0.0000  
 7785.0460 6202.3908 304.4343 -1582.6553 6265.1159  
 309.5314 -143.5326 -129.3783 511540.4688 -13.7530  
 -13.7416  
 [13049]ENERGY: 13960000 3220.0242 5449.6733 5416.3927  
 312.9828 -14440.2125 -1688.5271 0.0000 0.0000  
 7931.9379 6202.2713 310.1786 -1729.6666 6266.8015  
 309.6556 134.6705 119.8043 511540.4688 -14.2640  
 -14.2729  
 [13099]ENERGY: 13970000 3206.6225 5323.9679 5460.7184  
 312.7014 -14356.1282 -1704.0520 0.0000 0.0000  
 7956.2276 6200.0576 311.1284 -1756.1700 6266.0310  
 309.5997 -22.5701 18.3117 511540.4688 -18.6242  
 -18.6357  
 [13135]ENERGY: 13980000 3278.1441 5422.4855 5447.7133  
 323.1044 -14396.5858 -1725.1407 0.0000 0.0000  
 7850.9855 6200.7063 307.0129 -1650.2791 6266.1987  
 309.5089 -24.1168 -21.3334 511540.4688 -11.2980  
 -11.2955  
 [13185]ENERGY: 13990000 3280.7723 5283.8779 5485.0012  
 346.7864 -14415.8469 -1676.8903 0.0000 0.0000  
 7900.0019 6203.7024 308.9297 -1696.2995 6266.4149  
 309.5729 40.8151 -40.5277 511540.4688 -19.2414  
 -19.2305  
 [13224]ENERGY: 14000000 3305.4618 5375.9509 5398.1831  
 297.4546 -14293.7916 -1760.8284 0.0000 0.0000  
 7883.6297 6206.0602 308.2895 -1677.5695 6266.8490  
 309.3863 23.2841 -17.2702 511540.4688 -17.9866  
 -17.9876  
 [13274]ENERGY: 14010000 3239.4520 5347.7773 5452.5839  
 320.7563 -14373.0298 -1735.8944 0.0000 0.0000  
 7950.1673 6201.8126 310.8914 -1748.3547 6267.0001

## Supplementary Text 6

|                         |             |            |             |           |
|-------------------------|-------------|------------|-------------|-----------|
| 309.4061                | 185.8528    | 112.9694   | 511540.4688 | -12.9143  |
| -12.9244                |             |            |             |           |
| [13310]ENERGY: 14020000 | 3256.1527   | 5354.1845  | 5403.0317   |           |
| 309.5921                | -14348.4820 | -1746.7306 | 0.0000      | 0.0000    |
| 7974.3483               | 6202.0967   | 311.8370   | -1772.2516  | 6266.7042 |
| 309.5861                | -83.7582    | -95.9907   | 511540.4688 | -13.9276  |
| -13.9103                |             |            |             |           |
| [13360]ENERGY: 14030000 | 3299.2581   | 5222.2201  | 5427.4935   |           |
| 336.7159                | -14379.7576 | -1690.0974 | 0.0000      | 0.0000    |
| 7986.9354               | 6202.7680   | 312.3292   | -1784.1674  | 6266.8798 |
| 309.6435                | 26.6622     | -82.2924   | 511540.4688 | -14.5844  |
| -14.5963                |             |            |             |           |
| [13396]ENERGY: 14040000 | 3260.6337   | 5218.7557  | 5429.0363   |           |
| 322.2543                | -14313.6996 | -1716.2535 | 0.0000      | 0.0000    |
| 8001.0358               | 6201.7628   | 312.8806   | -1799.2731  | 6266.7206 |
| 309.4237                | 16.9437     | -32.4719   | 511540.4688 | -16.1787  |
| -16.1743                |             |            |             |           |
| [13446]ENERGY: 14050000 | 3238.2299   | 5273.0190  | 5436.0171   |           |
| 309.4364                | -14322.0490 | -1708.2716 | 0.0000      | 0.0000    |
| 7980.0583               | 6206.4402   | 312.0603   | -1773.6181  | 6266.4814 |
| 309.5134                | 182.6383    | 121.5574   | 511540.4688 | -10.8650  |
| -10.8569                |             |            |             |           |
| [13482]ENERGY: 14060000 | 3247.0713   | 5295.4200  | 5488.0517   |           |
| 336.0239                | -14404.8401 | -1633.3149 | 0.0000      | 0.0000    |
| 7873.6173               | 6202.0293   | 307.8979   | -1671.5880  | 6266.1754 |
| 309.3537                | 11.6605     | 67.0346    | 511540.4688 | -14.0738  |
| -14.0735                |             |            |             |           |
| [13532]ENERGY: 14070000 | 3225.7497   | 5397.3266  | 5390.6355   |           |
| 308.9924                | -14396.7478 | -1682.3273 | 0.0000      | 0.0000    |
| 7958.7476               | 6202.3768   | 311.2269   | -1756.3708  | 6266.4225 |
| 309.3199                | -91.0880    | -93.4415   | 511540.4688 | -18.3355  |
| -18.3444                |             |            |             |           |
| [13568]ENERGY: 14080000 | 3237.4451   | 5403.2409  | 5443.8579   |           |
| 309.8937                | -14352.1060 | -1702.7759 | 0.0000      | 0.0000    |
| 7864.0018               | 6203.5576   | 307.5219   | -1660.4443  | 6267.2352 |
| 309.4507                | -83.3626    | -78.7385   | 511540.4688 | -11.0419  |
| -11.0131                |             |            |             |           |
| [13618]ENERGY: 14090000 | 3249.1656   | 5303.5546  | 5470.0549   |           |
| 336.4251                | -14348.3116 | -1750.0325 | 0.0000      | 0.0000    |
| 7943.7165               | 6204.5726   | 310.6392   | -1739.1439  | 6268.5493 |
| 309.4084                | -50.2538    | -39.1789   | 511540.4688 | -16.2027  |
| -16.2284                |             |            |             |           |
| [13657]ENERGY: 14100000 | 3281.3006   | 5330.7401  | 5435.2693   |           |
| 325.2906                | -14390.8423 | -1699.7264 | 0.0000      | 0.0000    |
| 7924.6972               | 6206.7290   | 309.8954   | -1717.9682  | 6267.7875 |
| 309.6086                | 289.4324    | 142.4397   | 511540.4688 | -12.6172  |
| -12.6284                |             |            |             |           |
| [13707]ENERGY: 14110000 | 3304.5145   | 5312.6353  | 5488.4309   |           |
| 327.7427                | -14472.1104 | -1723.5457 | 0.0000      | 0.0000    |
| 7970.8360               | 6208.5032   | 311.6997   | -1762.3328  | 6269.0276 |
| 309.5944                | 115.9217    | 93.2756    | 511540.4688 | -16.2103  |
| -16.1857                |             |            |             |           |
| [13743]ENERGY: 14120000 | 3375.2894   | 5336.9300  | 5409.0378   |           |
| 334.8900                | -14398.5575 | -1713.4085 | 0.0000      | 0.0000    |

## Supplementary Text 6

|                         |             |            |             |           |
|-------------------------|-------------|------------|-------------|-----------|
| 7866.3669               | 6210.5481   | 307.6144   | -1655.8188  | 6268.0791 |
| 309.6192                | -87.8783    | -40.8662   | 511540.4688 | -17.4501  |
| -17.4482                |             |            |             |           |
| [13793]ENERGY: 14130000 | 3277.0255   | 5344.0755  | 5455.0595   |           |
| 327.3300                | -14384.4604 | -1782.5747 | 0.0000      | 0.0000    |
| 7969.4408               | 6205.8962   | 311.6451   | -1763.5446  | 6270.2257 |
| 309.5242                | -80.3530    | -95.9472   | 511540.4688 | -16.1776  |
| -16.2014                |             |            |             |           |
| [13829]ENERGY: 14140000 | 3258.3546   | 5450.8372  | 5447.1705   |           |
| 327.3167                | -14395.8706 | -1723.3642 | 0.0000      | 0.0000    |
| 7844.9108               | 6209.3551   | 306.7754   | -1635.5557  | 6271.4878 |
| 309.5902                | -20.7691    | 36.7954    | 511540.4688 | -18.1449  |
| -18.1364                |             |            |             |           |
| [13879]ENERGY: 14150000 | 3340.1305   | 5349.2851  | 5436.4091   |           |
| 311.3519                | -14317.9847 | -1793.4806 | 0.0000      | 0.0000    |
| 7884.3976               | 6210.1087   | 308.3195   | -1674.2888  | 6271.2227 |
| 309.5069                | -43.4036    | -125.2853  | 511540.4688 | -16.5282  |
| -16.5285                |             |            |             |           |
| [13915]ENERGY: 14160000 | 3192.6687   | 5381.0072  | 5409.5452   |           |
| 319.5603                | -14406.6421 | -1694.9811 | 0.0000      | 0.0000    |
| 8000.3655               | 6201.5237   | 312.8544   | -1798.8418  | 6270.7529 |
| 309.6772                | 184.1516    | 70.6965    | 511540.4688 | -18.5703  |
| -18.5581                |             |            |             |           |
| [13965]ENERGY: 14170000 | 3281.0459   | 5329.6975  | 5453.6785   |           |
| 313.1596                | -14393.9818 | -1701.3129 | 0.0000      | 0.0000    |
| 7924.0833               | 6206.3702   | 309.8714   | -1717.7131  | 6270.2586 |
| 309.7499                | 142.4763    | 106.5021   | 511540.4688 | -15.0011  |
| -15.0126                |             |            |             |           |
| [14001]ENERGY: 14180000 | 3332.4171   | 5364.9186  | 5469.2386   |           |
| 314.1956                | -14384.9202 | -1731.2096 | 0.0000      | 0.0000    |
| 7846.9627               | 6211.6027   | 306.8556   | -1635.3600  | 6271.5166 |
| 309.6329                | 13.2414     | -26.9085   | 511540.4688 | -14.6682  |
| -14.6783                |             |            |             |           |
| [14051]ENERGY: 14190000 | 3266.8753   | 5446.6316  | 5452.0867   |           |
| 324.8742                | -14343.6879 | -1828.1316 | 0.0000      | 0.0000    |
| 7890.5581               | 6209.2065   | 308.5604   | -1681.3516  | 6271.2647 |
| 309.5838                | -35.3043    | -105.9246  | 511540.4688 | -13.4202  |
| -13.4363                |             |            |             |           |
| [14090]ENERGY: 14200000 | 3231.4162   | 5327.8369  | 5397.7535   |           |
| 327.8152                | -14344.7978 | -1702.7745 | 0.0000      | 0.0000    |
| 7970.2549               | 6207.5044   | 311.6769   | -1762.7505  | 6270.4890 |
| 309.5709                | -167.4715   | -94.8971   | 511540.4688 | -14.5860  |
| -14.5633                |             |            |             |           |
| [14140]ENERGY: 14210000 | 3280.3384   | 5367.2556  | 5406.4667   |           |
| 318.2164                | -14358.1326 | -1713.7131 | 0.0000      | 0.0000    |
| 7906.8917               | 6207.3231   | 309.1991   | -1699.5686  | 6270.8080 |
| 309.6543                | -176.8656   | -50.5780   | 511540.4688 | -13.0180  |
| -13.0010                |             |            |             |           |
| [14176]ENERGY: 14220000 | 3339.6216   | 5414.7241  | 5410.0109   |           |
| 322.8518                | -14467.0028 | -1669.6756 | 0.0000      | 0.0000    |
| 7859.7151               | 6210.2451   | 307.3543   | -1649.4700  | 6270.3429 |
| 309.6082                | 1.4621      | 114.7680   | 511540.4688 | -19.0820  |
| -19.1016                |             |            |             |           |
| [14226]ENERGY: 14230000 | 3217.2656   | 5372.2062  | 5438.8897   |           |

## Supplementary Text 6

|                         |             |            |             |           |
|-------------------------|-------------|------------|-------------|-----------|
| 319.4323                | -14373.6267 | -1691.3949 | 0.0000      | 0.0000    |
| 7924.9811               | 6207.7534   | 309.9065   | -1717.2277  | 6271.1232 |
| 309.7448                | 262.8980    | 208.7453   | 511540.4688 | -16.4287  |
| -16.4432                |             |            |             |           |
| [14262]ENERGY: 14240000 | 3245.6874   | 5504.0994  | 5420.4625   |           |
| 321.7935                | -14482.2829 | -1745.1188 | 0.0000      | 0.0000    |
| 7941.4404               | 6206.0815   | 310.5502   | -1735.3589  | 6271.4364 |
| 309.5223                | 76.5379     | -90.4138   | 511540.4688 | -13.6278  |
| -13.6071                |             |            |             |           |
| [14312]ENERGY: 14250000 | 3252.1022   | 5439.7421  | 5445.1456   |           |
| 315.9775                | -14442.8955 | -1757.3381 | 0.0000      | 0.0000    |
| 7955.9063               | 6208.6402   | 311.1158   | -1747.2662  | 6272.2011 |
| 309.7707                | 127.9012    | 42.9822    | 511540.4688 | -17.1917  |
| -17.1902                |             |            |             |           |
| [14348]ENERGY: 14260000 | 3278.6368   | 5405.7354  | 5476.0131   |           |
| 322.2794                | -14426.8995 | -1731.6615 | 0.0000      | 0.0000    |
| 7883.4783               | 6207.5820   | 308.2835   | -1675.8963  | 6271.3645 |
| 309.8410                | 38.7616     | 62.2136    | 511540.4688 | -15.9331  |
| -15.9312                |             |            |             |           |
| [14398]ENERGY: 14270000 | 3251.2225   | 5402.7114  | 5424.0700   |           |
| 329.5703                | -14325.7462 | -1780.7137 | 0.0000      | 0.0000    |
| 7907.9046               | 6209.0189   | 309.2387   | -1698.8857  | 6273.2928 |
| 309.7189                | -96.8969    | -148.8104  | 511540.4688 | -13.5310  |
| -13.5485                |             |            |             |           |
| [14434]ENERGY: 14280000 | 3271.9498   | 5356.6032  | 5454.5560   |           |
| 314.6200                | -14359.2857 | -1738.3260 | 0.0000      | 0.0000    |
| 7909.4418               | 6209.5591   | 309.2988   | -1699.8827  | 6272.5006 |
| 309.5631                | 39.2914     | -50.1239   | 511540.4688 | -19.5203  |
| -19.5258                |             |            |             |           |
| [14484]ENERGY: 14290000 | 3265.9341   | 5360.7542  | 5456.6220   |           |
| 305.9415                | -14360.7674 | -1687.1653 | 0.0000      | 0.0000    |
| 7867.7963               | 6209.1153   | 307.6703   | -1658.6810  | 6272.6396 |
| 309.6999                | -4.3754     | -85.2649   | 511540.4688 | -13.4769  |
| -13.4689                |             |            |             |           |
| [14523]ENERGY: 14300000 | 3283.1667   | 5409.6275  | 5461.8445   |           |
| 322.1014                | -14482.7136 | -1733.9428 | 0.0000      | 0.0000    |
| 7947.9363               | 6208.0201   | 310.8042   | -1739.9162  | 6272.8383 |
| 309.5101                | 167.5815    | 16.7835    | 511540.4688 | -14.2571  |
| -14.2434                |             |            |             |           |
| [14573]ENERGY: 14310000 | 3288.1116   | 5305.4925  | 5432.2624   |           |
| 321.2550                | -14398.7392 | -1740.0733 | 0.0000      | 0.0000    |
| 8000.0415               | 6208.3505   | 312.8417   | -1791.6910  | 6272.3209 |
| 309.4866                | -111.8219   | -100.6126  | 511540.4688 | -17.3921  |
| -17.4029                |             |            |             |           |
| [14609]ENERGY: 14320000 | 3151.7122   | 5362.1222  | 5419.5420   |           |
| 325.1019                | -14389.9068 | -1628.1304 | 0.0000      | 0.0000    |
| 7967.5853               | 6208.0264   | 311.5725   | -1759.5588  | 6271.9190 |
| 309.6630                | 195.4718    | 158.9229   | 511540.4688 | -12.5272  |
| -12.5215                |             |            |             |           |
| [14659]ENERGY: 14330000 | 3216.2780   | 5270.6042  | 5451.0494   |           |
| 331.4196                | -14305.2896 | -1768.9886 | 0.0000      | 0.0000    |
| 8011.1588               | 6206.2318   | 313.2765   | -1804.9270  | 6273.5850 |
| 309.7670                | 14.8849     | -44.5487   | 511540.4688 | -16.0080  |
| -16.0228                |             |            |             |           |

## Supplementary Text 6

|                         |             |            |             |           |
|-------------------------|-------------|------------|-------------|-----------|
| [14695]ENERGY: 14340000 | 3205.2466   | 5254.6619  | 5494.6304   |           |
| 326.5062                | -14277.0511 | -1717.7460 | 0.0000      | 0.0000    |
| 7922.6603               | 6208.9083   | 309.8158   | -1713.7521  | 6272.2157 |
| 309.6237                | 226.0356    | 150.5896   | 511540.4688 | -14.2828  |
| -14.2796                |             |            |             |           |
| [14745]ENERGY: 14350000 | 3286.9795   | 5390.3568  | 5448.1074   |           |
| 337.6648                | -14387.5258 | -1816.7097 | 0.0000      | 0.0000    |
| 7948.5667               | 6207.4396   | 310.8288   | -1741.1271  | 6274.3080 |
| 309.6369                | 129.0383    | -45.1919   | 511540.4688 | -17.1851  |
| -17.1909                |             |            |             |           |
| [14781]ENERGY: 14360000 | 3335.2444   | 5360.7181  | 5445.9914   |           |
| 324.7698                | -14369.8304 | -1761.1802 | 0.0000      | 0.0000    |
| 7878.8441               | 6214.5572   | 308.1023   | -1664.2869  | 6273.1001 |
| 309.6660                | 26.1931     | 20.7455    | 511540.4688 | -19.6681  |
| -19.6573                |             |            |             |           |
| [14831]ENERGY: 14370000 | 3329.7887   | 5390.4389  | 5448.6811   |           |
| 320.6316                | -14363.7726 | -1799.9084 | 0.0000      | 0.0000    |
| 7883.7258               | 6209.5850   | 308.2932   | -1674.1407  | 6273.0016 |
| 309.5555                | -150.9843   | -214.2177  | 511540.4688 | -13.4160  |
| -13.3922                |             |            |             |           |
| [14867]ENERGY: 14380000 | 3220.3199   | 5390.4813  | 5489.1668   |           |
| 317.7435                | -14375.2149 | -1749.0889 | 0.0000      | 0.0000    |
| 7915.9996               | 6209.4074   | 309.5553   | -1706.5922  | 6272.8455 |
| 309.4373                | 41.8644     | -46.0099   | 511540.4688 | -17.2956  |
| -17.3114                |             |            |             |           |
| [14917]ENERGY: 14390000 | 3330.2532   | 5397.0881  | 5433.2763   |           |
| 341.8349                | -14372.3633 | -1765.7156 | 0.0000      | 0.0000    |
| 7845.2172               | 6209.5908   | 306.7873   | -1635.6264  | 6272.9495 |
| 309.5731                | -205.7485   | -144.1444  | 511540.4688 | -11.7927  |
| -11.7890                |             |            |             |           |
| [14956]ENERGY: 14400000 | 3314.4650   | 5438.5796  | 5357.8222   |           |
| 342.2805                | -14359.4935 | -1760.6378 | 0.0000      | 0.0000    |
| 7875.5776               | 6208.5936   | 307.9746   | -1666.9840  | 6273.3433 |
| 309.6436                | -114.5475   | -70.7390   | 511540.4688 | -18.8841  |
| -18.8843                |             |            |             |           |
| [15006]ENERGY: 14410000 | 3205.4190   | 5360.3008  | 5482.4433   |           |
| 326.4488                | -14398.2818 | -1685.1014 | 0.0000      | 0.0000    |
| 7915.5147               | 6206.7435   | 309.5363   | -1708.7712  | 6272.1697 |
| 309.7670                | 194.3994    | 142.5159   | 511540.4688 | -13.8469  |
| -13.8529                |             |            |             |           |
| [15042]ENERGY: 14420000 | 3336.9739   | 5380.0626  | 5406.1787   |           |
| 333.1275                | -14371.7046 | -1739.3340 | 0.0000      | 0.0000    |
| 7867.8229               | 6213.1269   | 307.6713   | -1654.6960  | 6273.7576 |
| 309.7677                | -62.3187    | -82.4316   | 511540.4688 | -11.1611  |
| -11.1524                |             |            |             |           |
| [15092]ENERGY: 14430000 | 3341.5724   | 5368.0801  | 5430.9877   |           |
| 318.4484                | -14432.3792 | -1766.9706 | 0.0000      | 0.0000    |
| 7947.4024               | 6207.1412   | 310.7833   | -1740.2612  | 6272.9834 |
| 309.7677                | -132.4250   | -114.1407  | 511540.4688 | -17.6835  |
| -17.6822                |             |            |             |           |
| [15128]ENERGY: 14440000 | 3275.7686   | 5337.9119  | 5492.3753   |           |
| 311.3306                | -14434.2334 | -1655.9973 | 0.0000      | 0.0000    |
| 7883.6047               | 6210.7605   | 308.2885   | -1672.8442  | 6272.6312 |
| 309.8724                | -6.9881     | 87.3518    | 511540.4688 | -8.7614   |

Supplementary Text 6

-8.7570  
 [15178]ENERGY: 14450000      3326.8566      5405.7597      5500.5255  
 307.8100      -14432.7075      -1709.1468      0.0000      0.0000  
 7810.5739      6209.6713      305.4326      -1600.9026      6272.5479  
 309.7253      -238.6573      -249.1926      511540.4688      -12.3356  
 -12.3509  
 [15214]ENERGY: 14460000      3231.4433      5426.6638      5419.7108  
 303.5326      -14296.9379      -1739.1546      0.0000      0.0000  
 7867.3457      6212.6038      307.6527      -1654.7419      6272.4433  
 309.8211      137.2981      -40.9370      511540.4688      -12.5045  
 -12.5142  
 [15264]ENERGY: 14470000      3272.5948      5305.6995      5419.3976  
 330.8369      -14400.0848      -1731.9057      0.0000      0.0000  
 8008.8090      6205.3473      313.1846      -1803.4617      6271.4883  
 309.7967      37.5496      6.0797      511540.4688      -9.9258  
 -9.9160  
 [15300]ENERGY: 14480000      3282.5105      5281.9351      5444.4634  
 341.0085      -14320.1968      -1691.5079      0.0000      0.0000  
 7868.5218      6206.7345      307.6987      -1661.7872      6273.7763  
 309.7788      43.7952      -147.0392      511540.4688      -13.5464  
 -13.5488  
 [15350]ENERGY: 14490000      3283.9532      5341.4846      5468.1237  
 338.1057      -14416.1404      -1784.2176      0.0000      0.0000  
 7980.1491      6211.4583      312.0639      -1768.6908      6275.3014  
 309.6356      -33.7645      -76.9007      511540.4688      -11.1116  
 -11.1014  
 [15389]ENERGY: 14500000      3342.6898      5405.1618      5500.4090  
 313.5198      -14498.6404      -1753.1679      0.0000      0.0000  
 7899.3280      6209.3000      308.9033      -1690.0281      6274.0232  
 309.6053      -46.4492      -13.5797      511540.4688      -14.5609  
 -14.5601  
 [15439]ENERGY: 14510000      3311.7495      5376.3025      5482.7594  
 313.6440      -14366.0407      -1743.2284      0.0000      0.0000  
 7836.1529      6211.3394      306.4329      -1624.8136      6274.3146  
 309.8029      -167.3734      -173.5721      511540.4688      -14.1860  
 -14.2002  
 [15475]ENERGY: 14520000      3346.4491      5266.5110      5462.9505  
 313.6191      -14384.2323      -1728.7885      0.0000      0.0000  
 7932.3772      6208.8862      310.1957      -1723.4910      6273.0437  
 309.8727      -116.9579      -150.4552      511540.4688      -12.3576  
 -12.3535  
 [15525]ENERGY: 14530000      3342.7428      5358.3258      5411.3321  
 313.8278      -14451.4271      -1722.4960      0.0000      0.0000  
 7960.8835      6213.1890      311.3105      -1747.6945      6274.7374  
 309.8986      77.1252      -95.4956      511540.4688      -14.4539  
 -14.4377  
 [15561]ENERGY: 14540000      3177.7327      5435.5409      5432.5924  
 301.4717      -14393.8473      -1740.2669      0.0000      0.0000  
 7992.0801      6205.3037      312.5304      -1786.7764      6273.9685  
 309.6070      60.1196      8.3255      511540.4688      -10.2214  
 -10.2365  
 [15611]ENERGY: 14550000      3234.0094      5350.8504      5446.7266  
 320.3275      -14372.7608      -1748.3834      0.0000      0.0000  
 7978.2987      6209.0685      311.9915      -1769.2302      6274.4195

## Supplementary Text 6

|                         |             |            |             |           |
|-------------------------|-------------|------------|-------------|-----------|
| 309.8398                | -18.4739    | -24.9277   | 511540.4688 | -13.5502  |
| -13.5604                |             |            |             |           |
| [15647]ENERGY: 14560000 | 3293.7127   | 5403.1355  | 5465.7016   |           |
| 331.6725                | -14325.8332 | -1801.2188 | 0.0000      | 0.0000    |
| 7844.0253               | 6211.1956   | 306.7407   | -1632.8297  | 6276.0022 |
| 309.9456                | 33.4692     | -29.4089   | 511540.4688 | -11.8773  |
| -11.8742                |             |            |             |           |
| [15697]ENERGY: 14570000 | 3277.1620   | 5389.5590  | 5417.9003   |           |
| 322.3342                | -14363.5766 | -1770.2318 | 0.0000      | 0.0000    |
| 7937.4038               | 6210.5509   | 310.3923   | -1726.8529  | 6275.1724 |
| 309.7156                | 42.6887     | -96.4976   | 511540.4688 | -16.9072  |
| -16.9332                |             |            |             |           |
| [15733]ENERGY: 14580000 | 3251.2160   | 5368.0074  | 5435.9942   |           |
| 321.3476                | -14369.5436 | -1721.7492 | 0.0000      | 0.0000    |
| 7924.5761               | 6209.8484   | 309.8907   | -1714.7276  | 6274.5202 |
| 309.7482                | 178.9285    | -38.8502   | 511540.4688 | -10.7684  |
| -10.7570                |             |            |             |           |
| [15783]ENERGY: 14590000 | 3336.9176   | 5249.9477  | 5468.0213   |           |
| 330.2883                | -14373.5659 | -1716.4460 | 0.0000      | 0.0000    |
| 7911.4685               | 6206.6315   | 309.3781   | -1704.8370  | 6273.6818 |
| 309.7861                | -228.7839   | -117.8317  | 511540.4688 | -15.2212  |
| -15.1801                |             |            |             |           |
| [15822]ENERGY: 14600000 | 3258.4861   | 5363.6468  | 5373.9275   |           |
| 319.0636                | -14376.9094 | -1644.8692 | 0.0000      | 0.0000    |
| 7919.6969               | 6213.0424   | 309.6999   | -1706.6546  | 6274.2523 |
| 309.8977                | 249.1465    | 288.2131   | 511540.4688 | -16.0318  |
| -16.0366                |             |            |             |           |
| [15872]ENERGY: 14610000 | 3193.7539   | 5442.1730  | 5393.1287   |           |
| 341.0840                | -14350.7615 | -1722.5851 | 0.0000      | 0.0000    |
| 7912.2695               | 6209.0626   | 309.4094   | -1703.2070  | 6275.2468 |
| 309.9145                | -84.1155    | -11.9754   | 511540.4688 | -12.0745  |
| -12.0747                |             |            |             |           |
| [15908]ENERGY: 14620000 | 3298.7024   | 5373.4638  | 5470.7334   |           |
| 314.5157                | -14460.5579 | -1720.9191 | 0.0000      | 0.0000    |
| 7934.9577               | 6210.8959   | 310.2966   | -1724.0618  | 6275.1429 |
| 309.7947                | 97.2120     | -16.9992   | 511540.4688 | -15.0715  |
| -15.0899                |             |            |             |           |
| [15958]ENERGY: 14630000 | 3207.0342   | 5381.2040  | 5435.0143   |           |
| 308.6070                | -14426.5086 | -1700.9365 | 0.0000      | 0.0000    |
| 8004.1021               | 6208.5165   | 313.0005   | -1795.5856  | 6275.5343 |
| 309.8904                | 175.8199    | 58.0391    | 511540.4688 | -12.8304  |
| -12.8096                |             |            |             |           |
| [15994]ENERGY: 14640000 | 3294.4717   | 5326.7746  | 5466.9154   |           |
| 324.4778                | -14365.7975 | -1706.7233 | 0.0000      | 0.0000    |
| 7877.0897               | 6217.2083   | 308.0337   | -1659.8814  | 6275.9229 |
| 309.8961                | 101.0176    | 56.4550    | 511540.4688 | -8.3966   |
| -8.4062                 |             |            |             |           |
| [16044]ENERGY: 14650000 | 3287.9193   | 5423.4738  | 5430.8963   |           |
| 331.9391                | -14447.3321 | -1777.0687 | 0.0000      | 0.0000    |
| 7961.5719               | 6211.3996   | 311.3374   | -1750.1723  | 6276.9442 |
| 309.9607                | -166.7165   | -158.7077  | 511540.4688 | -13.1697  |
| -13.1833                |             |            |             |           |
| [16080]ENERGY: 14660000 | 3243.0934   | 5407.0362  | 5428.1813   |           |
| 324.2536                | -14381.4022 | -1753.0459 | 0.0000      | 0.0000    |



## Supplementary Text 6

|                         |             |            |             |           |
|-------------------------|-------------|------------|-------------|-----------|
| 7945.7703               | 6213.8867   | 310.7195   | -1731.8837  | 6277.2744 |
| 309.9151                | 24.0135     | 56.5836    | 511540.4688 | -15.1302  |
| -15.1053                |             |            |             |           |
| [16130]ENERGY: 14670000 | 3238.5303   | 5388.2761  | 5392.1761   |           |
| 321.1484                | -14386.5635 | -1710.5670 | 0.0000      | 0.0000    |
| 7969.6257               | 6212.6261   | 311.6523   | -1756.9997  | 6277.4973 |
| 309.8382                | 17.6182     | 30.8780    | 511540.4688 | -14.1693  |
| -14.1962                |             |            |             |           |
| [16166]ENERGY: 14680000 | 3243.4217   | 5196.1260  | 5489.6561   |           |
| 305.5880                | -14320.4426 | -1631.9045 | 0.0000      | 0.0000    |
| 7930.2230               | 6212.6677   | 310.1115   | -1717.5553  | 6277.7806 |
| 309.8983                | 93.5183     | 71.3620    | 511540.4688 | -14.1776  |
| -14.1663                |             |            |             |           |
| [16216]ENERGY: 14690000 | 3236.3675   | 5352.2492  | 5475.2868   |           |
| 321.5728                | -14376.2225 | -1737.0955 | 0.0000      | 0.0000    |
| 7944.1702               | 6216.3286   | 310.6569   | -1727.8416  | 6278.6652 |
| 309.5994                | 231.7676    | 92.7593    | 511540.4688 | -12.9887  |
| -12.9827                |             |            |             |           |
| [16255]ENERGY: 14700000 | 3290.5706   | 5516.8945  | 5415.3263   |           |
| 307.4847                | -14468.8981 | -1743.8075 | 0.0000      | 0.0000    |
| 7897.0806               | 6214.6511   | 308.8155   | -1682.4295  | 6277.7095 |
| 309.5644                | -166.7192   | -190.2810  | 511540.4688 | -14.3325  |
| -14.3349                |             |            |             |           |
| [16305]ENERGY: 14710000 | 3304.4244   | 5246.8359  | 5489.3362   |           |
| 331.1249                | -14377.9332 | -1745.6011 | 0.0000      | 0.0000    |
| 7964.0146               | 6212.2017   | 311.4329   | -1751.8129  | 6278.7918 |
| 309.6671                | 93.8059     | -47.7912   | 511540.4688 | -7.7486   |
| -7.7771                 |             |            |             |           |
| [16341]ENERGY: 14720000 | 3241.5208   | 5345.4468  | 5475.4243   |           |
| 306.3421                | -14416.3580 | -1671.0364 | 0.0000      | 0.0000    |
| 7935.1800               | 6216.5195   | 310.3053   | -1718.6605  | 6278.3969 |
| 309.4740                | 170.5524    | 43.1774    | 511540.4688 | -13.5087  |
| -13.4983                |             |            |             |           |
| [16391]ENERGY: 14730000 | 3310.3123   | 5327.3165  | 5437.2794   |           |
| 305.0714                | -14381.1244 | -1739.2920 | 0.0000      | 0.0000    |
| 7955.4540               | 6215.0172   | 311.0982   | -1740.4368  | 6278.6059 |
| 309.6032                | 8.9516      | 17.8746    | 511540.4688 | -14.8262  |
| -14.8207                |             |            |             |           |
| [16427]ENERGY: 14740000 | 3221.1695   | 5274.6680  | 5452.2705   |           |
| 327.7432                | -14320.9505 | -1693.1929 | 0.0000      | 0.0000    |
| 7948.5365               | 6210.2444   | 310.8276   | -1738.2921  | 6276.6687 |
| 309.7392                | 126.7985    | 54.2946    | 511540.4688 | -13.8122  |
| -13.8205                |             |            |             |           |
| [16477]ENERGY: 14750000 | 3307.5291   | 5432.6263  | 5443.0381   |           |
| 323.6123                | -14426.4166 | -1698.7144 | 0.0000      | 0.0000    |
| 7833.9491               | 6215.6239   | 306.3467   | -1618.3252  | 6278.2034 |
| 309.8293                | -87.6254    | 28.8231    | 511540.4688 | -13.1715  |
| -13.1605                |             |            |             |           |
| [16513]ENERGY: 14760000 | 3226.9124   | 5452.6220  | 5442.1529   |           |
| 312.6742                | -14405.7344 | -1712.1803 | 0.0000      | 0.0000    |
| 7901.9133               | 6218.3601   | 309.0044   | -1683.5531  | 6278.3509 |
| 309.9048                | 114.0134    | 14.4030    | 511540.4688 | -15.5554  |
| -15.5538                |             |            |             |           |
| [16563]ENERGY: 14770000 | 3236.2633   | 5459.1210  | 5465.4446   |           |

## Supplementary Text 6

|                         |             |            |             |           |
|-------------------------|-------------|------------|-------------|-----------|
| 327.8973                | -14441.2049 | -1726.0580 | 0.0000      | 0.0000    |
| 7894.7374               | 6216.2007   | 308.7238   | -1678.5367  | 6279.3347 |
| 309.6651                | -142.0577   | -114.7015  | 511540.4688 | -13.7751  |
| -13.7898                |             |            |             |           |
| [16599]ENERGY: 14780000 | 3300.9373   | 5314.8658  | 5405.4717   |           |
| 308.7611                | -14303.8857 | -1761.8501 | 0.0000      | 0.0000    |
| 7953.2191               | 6217.5192   | 311.0108   | -1735.6999  | 6279.3930 |
| 309.6153                | 2.5556      | 36.6366    | 511540.4688 | -16.9231  |
| -16.9258                |             |            |             |           |
| [16649]ENERGY: 14790000 | 3221.8287   | 5429.5905  | 5422.7423   |           |
| 309.1211                | -14329.0624 | -1751.8371 | 0.0000      | 0.0000    |
| 7910.1622               | 6212.5454   | 309.3270   | -1697.6168  | 6279.4551 |
| 309.7149                | -69.2111    | -108.6791  | 511540.4688 | -14.0623  |
| -14.0277                |             |            |             |           |
| [16688]ENERGY: 14800000 | 3287.6503   | 5373.7246  | 5422.4591   |           |
| 310.6404                | -14345.0114 | -1703.0161 | 0.0000      | 0.0000    |
| 7869.7112               | 6216.1581   | 307.7452   | -1653.5531  | 6279.3039 |
| 309.7747                | 148.1713    | 44.0630    | 511540.4688 | -12.6765  |
| -12.6974                |             |            |             |           |
| [16738]ENERGY: 14810000 | 3266.5073   | 5385.5691  | 5452.8160   |           |
| 324.6718                | -14334.4005 | -1682.4877 | 0.0000      | 0.0000    |
| 7809.8788               | 6222.5547   | 305.4054   | -1587.3241  | 6280.0579 |
| 309.6804                | 68.9507     | 78.3655    | 511540.4688 | -17.2614  |
| -17.2671                |             |            |             |           |
| [16774]ENERGY: 14820000 | 3215.9174   | 5242.6106  | 5439.3544   |           |
| 328.9807                | -14326.3304 | -1729.1016 | 0.0000      | 0.0000    |
| 8042.2401               | 6213.6712   | 314.4919   | -1828.5688  | 6280.0686 |
| 309.7988                | -6.2949     | -81.4126   | 511540.4688 | -15.1031  |
| -15.1034                |             |            |             |           |
| [16824]ENERGY: 14830000 | 3249.2662   | 5436.9073  | 5436.4071   |           |
| 333.6078                | -14457.7043 | -1717.1904 | 0.0000      | 0.0000    |
| 7938.9354               | 6220.2291   | 310.4522   | -1718.7064  | 6280.5185 |
| 310.0190                | -109.6975   | -86.5153   | 511540.4688 | -15.3429  |
| -15.3501                |             |            |             |           |
| [16860]ENERGY: 14840000 | 3223.7544   | 5382.4983  | 5493.6093   |           |
| 328.1283                | -14448.4096 | -1693.6379 | 0.0000      | 0.0000    |
| 7931.0858               | 6217.0286   | 310.1452   | -1714.0572  | 6280.6599 |
| 310.0537                | 201.3127    | 140.7162   | 511540.4688 | -15.2788  |
| -15.2628                |             |            |             |           |
| [16910]ENERGY: 14850000 | 3270.8715   | 5355.3156  | 5501.4783   |           |
| 314.6053                | -14392.9180 | -1692.4779 | 0.0000      | 0.0000    |
| 7859.1595               | 6216.0343   | 307.3326   | -1643.1252  | 6281.6244 |
| 309.9185                | 60.8525     | 32.4681    | 511540.4688 | -22.5780  |
| -22.5679                |             |            |             |           |
| [16946]ENERGY: 14860000 | 3340.8037   | 5328.4898  | 5398.0272   |           |
| 319.9717                | -14368.3697 | -1745.2679 | 0.0000      | 0.0000    |
| 7946.5522               | 6220.2070   | 310.7500   | -1726.3452  | 6281.4261 |
| 309.7941                | -140.6023   | -95.8752   | 511540.4688 | -14.9295  |
| -14.9513                |             |            |             |           |
| [16996]ENERGY: 14870000 | 3290.9928   | 5308.7710  | 5457.2798   |           |
| 329.3516                | -14383.2026 | -1733.2001 | 0.0000      | 0.0000    |
| 7946.4915               | 6216.4840   | 310.7477   | -1730.0074  | 6281.6037 |
| 309.7794                | 106.7071    | 33.1161    | 511540.4688 | -16.6610  |
| -16.6526                |             |            |             |           |

## Supplementary Text 6

|                         |             |            |             |
|-------------------------|-------------|------------|-------------|
| [17032]ENERGY: 14880000 | 3218.6738   | 5458.5544  | 5474.5407   |
| 352.9934                | -14481.7350 | -1734.9168 | 0.0000      |
| 7930.8857               | 6218.9961   | 310.1374   | -1711.8896  |
| 309.7293                | 8.6879      | 25.0925    | 511540.4688 |
| -12.5261                |             |            | -12.5306    |
| [17082]ENERGY: 14890000 | 3316.2834   | 5283.8432  | 5471.9621   |
| 324.4624                | -14380.1607 | -1707.3998 | 0.0000      |
| 7910.8490               | 6219.8396   | 309.3539   | -1691.0095  |
| 309.5539                | -47.5403    | 8.7613     | 511540.4688 |
| -14.7077                |             |            | -14.7117    |
| [17121]ENERGY: 14900000 | 3303.4026   | 5302.4579  | 5457.0676   |
| 331.5832                | -14325.4149 | -1766.1329 | 0.0000      |
| 7912.1918               | 6215.1552   | 309.4064   | -1697.0365  |
| 309.6901                | -92.2315    | -43.6706   | 511540.4688 |
| -15.0655                |             |            | -15.0586    |
| [17171]ENERGY: 14910000 | 3256.7457   | 5375.0015  | 5483.2407   |
| 313.2001                | -14455.1066 | -1720.8321 | 0.0000      |
| 7964.8076               | 6217.0568   | 311.4639   | -1747.7508  |
| 309.6921                | 91.3608     | 70.0321    | 511540.4688 |
| -18.7414                |             |            | -18.7369    |
| [17207]ENERGY: 14920000 | 3358.8835   | 5364.6710  | 5424.8476   |
| 323.5538                | -14407.3173 | -1696.3178 | 0.0000      |
| 7847.9058               | 6216.2266   | 306.8925   | -1631.6792  |
| 309.6821                | 10.7730     | -116.7635  | 511540.4688 |
| -16.0287                |             |            | -16.0271    |
| [17257]ENERGY: 14930000 | 3283.8768   | 5416.5509  | 5406.7167   |
| 344.7388                | -14480.1889 | -1766.3379 | 0.0000      |
| 8006.0189               | 6211.3753   | 313.0755   | -1794.6436  |
| 309.5856                | 7.1728      | -7.7918    | 511540.4688 |
| -13.6859                |             |            | -13.6855    |
| [17293]ENERGY: 14940000 | 3211.5254   | 5428.9048  | 5492.4119   |
| 348.0288                | -14402.2965 | -1730.6169 | 0.0000      |
| 7868.4199               | 6216.3774   | 307.6947   | -1652.0425  |
| 309.5594                | 179.6704    | 84.2584    | 511540.4688 |
| -11.5976                |             |            | -11.6035    |
| [17343]ENERGY: 14950000 | 3274.1224   | 5388.0364  | 5462.1229   |
| 342.0135                | -14287.6556 | -1751.5920 | 0.0000      |
| 7791.1273               | 6218.1748   | 304.6722   | -1572.9524  |
| 309.5106                | 78.5696     | -49.6578   | 511540.4688 |
| -12.6221                |             |            | -12.6223    |
| [17379]ENERGY: 14960000 | 3247.1806   | 5390.3578  | 5462.6836   |
| 315.5619                | -14405.5404 | -1787.6604 | 0.0000      |
| 7993.3965               | 6215.9796   | 312.5819   | -1777.4170  |
| 309.6704                | 100.0889    | -35.3191   | 511540.4688 |
| -14.9725                |             |            | -14.9559    |
| [17429]ENERGY: 14970000 | 3366.4340   | 5359.1712  | 5493.6550   |
| 323.0526                | -14482.2774 | -1711.1552 | 0.0000      |
| 7869.8384               | 6218.7187   | 307.7502   | -1651.1197  |
| 309.7099                | -311.3127   | -287.8406  | 511540.4688 |
| -11.2579                |             |            | -11.2837    |
| [17465]ENERGY: 14980000 | 3339.5121   | 5283.5727  | 5444.3767   |
| 318.4445                | -14346.3254 | -1770.9465 | 0.0000      |
| 7950.7019               | 6219.3359   | 310.9123   | -1731.3660  |
| 309.7370                | -64.0712    | 35.6213    | 511540.4688 |
|                         |             |            | -11.9351    |

Supplementary Text 6

-11.9340  
 [17515]ENERGY: 14990000      3305.1300      5343.1257      5438.8922  
 342.3233      -14381.4151      -1710.2533      0.0000      0.0000  
 7883.0197      6220.8225      308.2656      -1662.1972      6283.1820  
 309.7782      -120.3534      -214.3940      511540.4688      -15.0296  
 -15.0190  
 [17554]ENERGY: 15000000      3258.7505      5390.5012      5471.7117  
 324.3753      -14373.1542      -1745.2216      0.0000      0.0000  
 7888.0812      6215.0440      308.4635      -1673.0372      6282.2943  
 309.8488      -149.0256      -118.9459      511540.4688      -17.1462  
 -17.1623  
 [17604]ENERGY: 15010000      3277.9179      5375.8589      5473.2270  
 314.5050      -14366.8624      -1765.0700      0.0000      0.0000  
 7908.6844      6218.2609      309.2692      -1690.4235      6284.0867  
 309.9432      -242.3821      -290.0283      511540.4688      -10.6653  
 -10.6740  
 [17640]ENERGY: 15020000      3256.0785      5455.7218      5498.6458  
 310.3563      -14419.1401      -1744.4450      0.0000      0.0000  
 7861.7423      6218.9597      307.4336      -1642.7826      6283.1644  
 309.7602      -101.1150      40.2863      511540.4688      -11.5737  
 -11.5582  
 [17690]ENERGY: 15030000      3286.7896      5293.3970      5436.3802  
 309.3074      -14357.7313      -1697.7259      0.0000      0.0000  
 7947.2072      6217.6242      310.7757      -1729.5830      6283.1639  
 309.7279      253.7352      193.3756      511540.4688      -17.3947  
 -17.4132  
 [17726]ENERGY: 15040000      3308.9782      5275.7568      5441.1360  
 327.9207      -14369.2244      -1718.9771      0.0000      0.0000  
 7951.7096      6217.2998      310.9517      -1734.4098      6284.1117  
 309.7101      -141.4062      -138.2751      511540.4688      -12.4937  
 -12.4964  
 [17776]ENERGY: 15050000      3265.1203      5278.0083      5467.5630  
 326.9181      -14358.7686      -1685.5009      0.0000      0.0000  
 7924.3166      6217.6568      309.8805      -1706.6597      6284.0323  
 309.8234      -159.4077      -79.1647      511540.4688      -14.3246  
 -14.3035  
 [17812]ENERGY: 15060000      3155.0549      5395.0477      5455.0696  
 335.0463      -14370.0788      -1750.6383      0.0000      0.0000  
 7996.5203      6216.0217      312.7040      -1780.4986      6283.7151  
 309.6028      57.7464      53.9272      511540.4688      -15.7704  
 -15.7713  
 [17862]ENERGY: 15070000      3228.2643      5483.1965      5423.8443  
 315.6092      -14338.4934      -1796.3814      0.0000      0.0000  
 7906.7809      6222.8204      309.1948      -1683.9605      6285.6421  
 309.5685      154.2176      -30.6424      511540.4688      -10.8508  
 -10.8756  
 [17898]ENERGY: 15080000      3269.3059      5360.2112      5458.2455  
 333.2862      -14476.0186      -1641.9847      0.0000      0.0000  
 7914.8634      6217.9091      309.5109      -1696.9544      6283.4367  
 309.5358      -15.5441      -12.8138      511540.4688      -11.2416  
 -11.2249  
 [17948]ENERGY: 15090000      3143.0728      5353.0048      5463.7407  
 297.1495      -14299.1447      -1676.3361      0.0000      0.0000  
 7936.7679      6218.2549      310.3674      -1718.5130      6284.9034

## Supplementary Text 6

|                         |             |            |             |           |
|-------------------------|-------------|------------|-------------|-----------|
| 309.6251                | 44.1288     | -33.4584   | 511540.4688 | -12.4548  |
| -12.4615                |             |            |             |           |
| [17987]ENERGY: 15100000 | 3245.3584   | 5370.9870  | 5461.2991   |           |
| 331.1613                | -14437.2928 | -1693.2365 | 0.0000      | 0.0000    |
| 7939.7582               | 6218.0347   | 310.4844   | -1721.7235  | 6283.4472 |
| 309.9256                | 75.6538     | 33.8641    | 511540.4688 | -10.3408  |
| -10.3439                |             |            |             |           |
| [18037]ENERGY: 15110000 | 3304.8049   | 5384.0728  | 5408.9789   |           |
| 336.8062                | -14442.2856 | -1664.2375 | 0.0000      | 0.0000    |
| 7895.5540               | 6223.6937   | 308.7558   | -1671.8603  | 6284.2494 |
| 309.9028                | 79.1670     | -10.4846   | 511540.4688 | -12.6364  |
| -12.5972                |             |            |             |           |
| [18073]ENERGY: 15120000 | 3302.8817   | 5267.5870  | 5451.1075   |           |
| 313.2182                | -14406.5662 | -1709.5150 | 0.0000      | 0.0000    |
| 8000.1277               | 6218.8410   | 312.8451   | -1781.2867  | 6284.7037 |
| 309.8575                | -77.2491    | -33.2209   | 511540.4688 | -13.0920  |
| -13.1211                |             |            |             |           |
| [18123]ENERGY: 15130000 | 3262.3130   | 5387.2583  | 5430.7836   |           |
| 339.7181                | -14532.2781 | -1666.3405 | 0.0000      | 0.0000    |
| 7996.8858               | 6218.3401   | 312.7183   | -1778.5457  | 6284.3763 |
| 309.8621                | 91.6183     | 108.2024   | 511540.4688 | -12.2523  |
| -12.2677                |             |            |             |           |
| [18159]ENERGY: 15140000 | 3333.3740   | 5341.7343  | 5427.5869   |           |
| 343.7699                | -14389.0487 | -1691.3831 | 0.0000      | 0.0000    |
| 7853.6341               | 6219.6674   | 307.1165   | -1633.9667  | 6283.8309 |
| 309.8132                | 65.7855     | 106.6011   | 511540.4688 | -10.2520  |
| -10.2407                |             |            |             |           |
| [18209]ENERGY: 15150000 | 3344.7757   | 5296.0133  | 5441.6516   |           |
| 318.6892                | -14415.8076 | -1712.4347 | 0.0000      | 0.0000    |
| 7948.0791               | 6220.9665   | 310.8098   | -1727.1126  | 6284.8971 |
| 309.9611                | 29.2557     | -49.2826   | 511540.4688 | -7.2587   |
| -7.2599                 |             |            |             |           |
| [18245]ENERGY: 15160000 | 3218.3063   | 5398.6640  | 5459.5121   |           |
| 332.3290                | -14278.3553 | -1739.6864 | 0.0000      | 0.0000    |
| 7831.0225               | 6221.7922   | 306.2323   | -1609.2303  | 6284.5514 |
| 309.9757                | 226.7464    | 135.0201   | 511540.4688 | -9.8983   |
| -9.9061                 |             |            |             |           |
| [18295]ENERGY: 15170000 | 3315.9090   | 5393.0532  | 5436.7939   |           |
| 354.0519                | -14381.5213 | -1717.8401 | 0.0000      | 0.0000    |
| 7825.5773               | 6226.0239   | 306.0193   | -1599.5534  | 6285.4504 |
| 309.9217                | 7.1364      | -134.1672  | 511540.4688 | -12.4984  |
| -12.4960                |             |            |             |           |
| [18331]ENERGY: 15180000 | 3276.8266   | 5354.6164  | 5449.6035   |           |
| 330.8426                | -14404.7775 | -1738.5052 | 0.0000      | 0.0000    |
| 7951.9027               | 6220.5091   | 310.9593   | -1731.3936  | 6285.1465 |
| 310.0341                | -46.2327    | -93.7348   | 511540.4688 | -9.1367   |
| -9.1353                 |             |            |             |           |
| [18381]ENERGY: 15190000 | 3313.0279   | 5351.9496  | 5416.1104   |           |
| 339.5553                | -14468.2976 | -1696.5902 | 0.0000      | 0.0000    |
| 7963.7064               | 6219.4617   | 311.4209   | -1744.2447  | 6285.5322 |
| 309.7603                | 208.2555    | 209.2078   | 511540.4688 | -17.6393  |
| -17.6137                |             |            |             |           |
| [18420]ENERGY: 15200000 | 3325.7851   | 5434.2535  | 5477.1587   |           |
| 309.1787                | -14372.9408 | -1736.0189 | 0.0000      | 0.0000    |

## Supplementary Text 6

|                         |             |            |             |           |
|-------------------------|-------------|------------|-------------|-----------|
| 7786.6806               | 6224.0969   | 304.4983   | -1562.5838  | 6285.8007 |
| 309.7965                | -160.8632   | -119.8170  | 511540.4688 | -10.8262  |
| -10.8210                |             |            |             |           |
| [18470]ENERGY: 15210000 | 3286.9071   | 5352.3255  | 5417.0202   |           |
| 321.2542                | -14276.5929 | -1755.8332 | 0.0000      | 0.0000    |
| 7878.8343               | 6223.9153   | 308.1019   | -1654.9190  | 6285.6117 |
| 309.6865                | -183.8179   | -88.7255   | 511540.4688 | -10.0411  |
| -10.0446                |             |            |             |           |
| [18506]ENERGY: 15220000 | 3281.7571   | 5366.4887  | 5499.2860   |           |
| 311.2140                | -14411.0512 | -1696.7104 | 0.0000      | 0.0000    |
| 7871.2830               | 6222.2672   | 307.8066   | -1649.0157  | 6285.5104 |
| 309.7032                | 52.0124     | 37.2041    | 511540.4688 | -11.3950  |
| -11.4323                |             |            |             |           |
| [18556]ENERGY: 15230000 | 3288.8555   | 5450.1563  | 5467.6909   |           |
| 317.0693                | -14370.5123 | -1737.1715 | 0.0000      | 0.0000    |
| 7808.0194               | 6224.1077   | 305.3327   | -1583.9117  | 6285.3542 |
| 309.7614                | -54.8798    | -46.6735   | 511540.4688 | -14.8914  |
| -14.8749                |             |            |             |           |
| [18592]ENERGY: 15240000 | 3245.4064   | 5326.1688  | 5510.3025   |           |
| 349.0302                | -14500.1082 | -1656.5871 | 0.0000      | 0.0000    |
| 7945.8279               | 6220.0405   | 310.7217   | -1725.7874  | 6286.2091 |
| 309.7616                | -134.0934   | -151.6466  | 511540.4688 | -12.4873  |
| -12.4918                |             |            |             |           |
| [18642]ENERGY: 15250000 | 3197.4543   | 5366.3793  | 5450.8201   |           |
| 329.9478                | -14415.5772 | -1666.3381 | 0.0000      | 0.0000    |
| 7957.4711               | 6220.1572   | 311.1770   | -1737.3139  | 6286.0416 |
| 309.5482                | 125.8222    | 153.4340   | 511540.4688 | -8.4200   |
| -8.4211                 |             |            |             |           |
| [18678]ENERGY: 15260000 | 3358.0318   | 5392.7877  | 5375.7866   |           |
| 327.6598                | -14340.7898 | -1777.5035 | 0.0000      | 0.0000    |
| 7887.5844               | 6223.5571   | 308.4441   | -1664.0273  | 6286.8273 |
| 309.6724                | -260.8594   | -185.6907  | 511540.4688 | -13.4193  |
| -13.4048                |             |            |             |           |
| [18728]ENERGY: 15270000 | 3237.2234   | 5264.8781  | 5479.0233   |           |
| 324.4265                | -14437.2532 | -1635.0350 | 0.0000      | 0.0000    |
| 7986.4411               | 6219.7041   | 312.3099   | -1766.7370  | 6286.6027 |
| 310.0978                | 146.3284    | 68.3499    | 511540.4688 | -9.6139   |
| -9.6277                 |             |            |             |           |
| [18764]ENERGY: 15280000 | 3350.5202   | 5427.0941  | 5442.9593   |           |
| 317.3117                | -14371.2621 | -1791.2788 | 0.0000      | 0.0000    |
| 7849.1674               | 6224.5117   | 306.9418   | -1624.6556  | 6288.0826 |
| 309.9809                | -233.4919   | -169.5770  | 511540.4688 | -15.8493  |
| -15.8588                |             |            |             |           |
| [18814]ENERGY: 15290000 | 3296.7409   | 5344.0448  | 5459.3977   |           |
| 323.8304                | -14350.4773 | -1747.5210 | 0.0000      | 0.0000    |
| 7898.7774               | 6224.7928   | 308.8818   | -1673.9846  | 6287.5024 |
| 310.0067                | 16.1992     | -101.0066  | 511540.4688 | -11.7966  |
| -11.7713                |             |            |             |           |
| [18853]ENERGY: 15300000 | 3296.0313   | 5431.9800  | 5465.1039   |           |
| 335.8448                | -14437.6665 | -1755.6944 | 0.0000      | 0.0000    |
| 7887.4145               | 6223.0136   | 308.4375   | -1664.4009  | 6286.8795 |
| 309.9963                | 7.5723      | -27.1299   | 511540.4688 | -16.5547  |
| -16.5531                |             |            |             |           |
| [18903]ENERGY: 15310000 | 3333.7231   | 5354.5605  | 5488.9840   |           |

## Supplementary Text 6

|                         |             |            |             |           |
|-------------------------|-------------|------------|-------------|-----------|
| 329.3113                | -14498.0901 | -1652.6888 | 0.0000      | 0.0000    |
| 7869.2976               | 6225.0975   | 307.7290   | -1644.2001  | 6285.7708 |
| 309.9042                | -168.6256   | -91.2510   | 511540.4688 | -10.0115  |
| -10.0177                |             |            |             |           |
| [18939]ENERGY: 15320000 | 3283.8347   | 5217.1664  | 5449.7708   |           |
| 310.0478                | -14329.7141 | -1703.5575 | 0.0000      | 0.0000    |
| 7992.3390               | 6219.8871   | 312.5405   | -1772.4519  | 6287.7719 |
| 309.9338                | 341.8599    | 260.6695   | 511540.4688 | -15.6803  |
| -15.6946                |             |            |             |           |
| [18989]ENERGY: 15330000 | 3288.8381   | 5328.3297  | 5436.6595   |           |
| 309.7596                | -14361.6193 | -1676.8480 | 0.0000      | 0.0000    |
| 7896.2865               | 6221.4062   | 308.7844   | -1674.8803  | 6286.3522 |
| 309.8560                | 124.1530    | 85.5227    | 511540.4688 | -8.5752   |
| -8.5552                 |             |            |             |           |
| [19025]ENERGY: 15340000 | 3302.7698   | 5445.2413  | 5497.1236   |           |
| 343.5862                | -14541.5880 | -1721.8239 | 0.0000      | 0.0000    |
| 7894.9321               | 6220.2412   | 308.7314   | -1674.6909  | 6286.3657 |
| 309.8497                | -44.0680    | -93.7323   | 511540.4688 | -12.1175  |
| -12.1296                |             |            |             |           |
| [19075]ENERGY: 15350000 | 3348.4972   | 5391.6160  | 5448.0264   |           |
| 347.5175                | -14475.0650 | -1646.6044 | 0.0000      | 0.0000    |
| 7810.9003               | 6224.8881   | 305.4454   | -1586.0123  | 6285.5352 |
| 309.8213                | 55.7870     | 12.9249    | 511540.4688 | -12.4316  |
| -12.4319                |             |            |             |           |
| [19111]ENERGY: 15360000 | 3307.4155   | 5340.7917  | 5416.9281   |           |
| 348.7945                | -14326.5434 | -1739.6421 | 0.0000      | 0.0000    |
| 7878.6316               | 6226.3759   | 308.0940   | -1652.2557  | 6287.0521 |
| 309.8388                | -21.5854    | -145.0229  | 511540.4688 | -9.7283   |
| -9.7222                 |             |            |             |           |
| [19161]ENERGY: 15370000 | 3244.9244   | 5371.1192  | 5476.6287   |           |
| 308.0158                | -14389.0475 | -1706.5612 | 0.0000      | 0.0000    |
| 7919.7254               | 6224.8047   | 309.7010   | -1694.9207  | 6285.7286 |
| 309.9051                | 145.8759    | 116.4662   | 511540.4688 | -9.7531   |
| -9.7457                 |             |            |             |           |
| [19197]ENERGY: 15380000 | 3204.4228   | 5318.2479  | 5445.9366   |           |
| 323.1728                | -14357.3704 | -1744.3680 | 0.0000      | 0.0000    |
| 8029.6053               | 6219.6470   | 313.9978   | -1809.9582  | 6286.3306 |
| 309.9369                | 108.8196    | 89.3418    | 511540.4688 | -12.5912  |
| -12.6088                |             |            |             |           |
| [19247]ENERGY: 15390000 | 3241.6767   | 5374.2815  | 5475.3488   |           |
| 305.5380                | -14471.9928 | -1694.3223 | 0.0000      | 0.0000    |
| 7989.2389               | 6219.7688   | 312.4193   | -1769.4701  | 6285.7765 |
| 309.7478                | -134.8656   | -132.8696  | 511540.4688 | -15.9813  |
| -15.9746                |             |            |             |           |
| [19286]ENERGY: 15400000 | 3293.4414   | 5303.2761  | 5449.4944   |           |
| 322.3468                | -14342.4310 | -1702.0539 | 0.0000      | 0.0000    |
| 7898.2408               | 6222.3145   | 308.8608   | -1675.9263  | 6285.9792 |
| 309.9184                | -101.8035   | -166.9447  | 511540.4688 | -16.2455  |
| -16.2501                |             |            |             |           |
| [19336]ENERGY: 15410000 | 3240.5982   | 5408.6527  | 5458.0427   |           |
| 338.2554                | -14408.3488 | -1708.8744 | 0.0000      | 0.0000    |
| 7893.8634               | 6222.1893   | 308.6897   | -1671.6741  | 6286.5554 |
| 309.9821                | -8.1456     | -7.8253    | 511540.4688 | -14.0863  |
| -14.0782                |             |            |             |           |

## Supplementary Text 6

|                         |             |            |             |
|-------------------------|-------------|------------|-------------|
| [19372]ENERGY: 15420000 | 3217.1272   | 5531.4196  | 5426.8034   |
| 326.6336                | -14376.6049 | -1758.6362 | 0.0000      |
| 7855.8611               | 6222.6040   | 307.2036   | -1633.2572  |
| 310.1932                | -104.8699   | -93.5892   | 511540.4688 |
| -13.1347                |             |            | -13.1455    |
| [19422]ENERGY: 15430000 | 3204.8260   | 5425.9326  | 5493.9626   |
| 302.6877                | -14374.8424 | -1812.5798 | 0.0000      |
| 7977.1921               | 6217.1787   | 311.9482   | -1760.0134  |
| 309.7528                | -58.6672    | -123.9199  | 511540.4688 |
| -12.7104                |             |            | -12.7033    |
| [19458]ENERGY: 15440000 | 3271.3587   | 5357.4188  | 5385.3756   |
| 326.6320                | -14352.4872 | -1684.9875 | 0.0000      |
| 7920.5504               | 6223.8609   | 309.7332   | -1696.6895  |
| 309.9031                | -84.2007    | -53.4581   | 511540.4688 |
| -14.1782                |             |            | -14.1793    |
| [19508]ENERGY: 15450000 | 3299.5297   | 5401.5200  | 5416.9578   |
| 325.3038                | -14407.2430 | -1730.2944 | 0.0000      |
| 7911.4480               | 6217.2219   | 309.3773   | -1694.2261  |
| 309.8850                | 113.2734    | 69.5077    | 511540.4688 |
| -10.2696                |             |            | -10.2588    |
| [19544]ENERGY: 15460000 | 3318.8298   | 5342.3089  | 5373.9838   |
| 322.6764                | -14387.3135 | -1708.0189 | 0.0000      |
| 7958.1358               | 6220.6023   | 311.2030   | -1737.5335  |
| 309.8537                | 53.4333     | -85.8714   | 511540.4688 |
| -16.9038                |             |            | -16.8927    |
| [19594]ENERGY: 15470000 | 3287.2046   | 5266.3421  | 5476.2596   |
| 327.9473                | -14374.9430 | -1728.0416 | 0.0000      |
| 7965.2188               | 6219.9877   | 311.4800   | -1745.2311  |
| 310.1803                | -109.3135   | -124.0460  | 511540.4688 |
| -14.3681                |             |            | -14.3939    |
| [19630]ENERGY: 15480000 | 3136.6595   | 5394.9134  | 5440.7804   |
| 324.5796                | -14367.2380 | -1767.1709 | 0.0000      |
| 8054.8252               | 6217.3493   | 314.9841   | -1837.4759  |
| 310.0816                | 58.9165     | -15.1466   | 511540.4688 |
| -15.4231                |             |            | -15.4137    |
| [19680]ENERGY: 15490000 | 3270.8930   | 5471.5597  | 5480.6648   |
| 344.7065                | -14378.5657 | -1754.4708 | 0.0000      |
| 7791.6988               | 6226.4862   | 304.6945   | -1565.2126  |
| 309.9175                | -118.9882   | -69.6472   | 511540.4688 |
| -12.0750                |             |            | -12.0927    |
| [19719]ENERGY: 15500000 | 3273.8748   | 5471.5874  | 5448.8247   |
| 328.1305                | -14480.6362 | -1697.0660 | 0.0000      |
| 7877.2596               | 6221.9747   | 308.0404   | -1655.2849  |
| 309.8777                | 192.2229    | 50.7730    | 511540.4688 |
| -16.8138                |             |            | -16.8269    |
| [19769]ENERGY: 15510000 | 3292.7503   | 5292.6491  | 5464.7124   |
| 346.9173                | -14304.8083 | -1758.5808 | 0.0000      |
| 7886.8197               | 6220.4597   | 308.4142   | -1666.3599  |
| 310.0476                | -85.1608    | -70.8444   | 511540.4688 |
| -14.3663                |             |            | -14.3440    |
| [19805]ENERGY: 15520000 | 3277.6994   | 5350.9335  | 5455.2709   |
| 313.5917                | -14380.8229 | -1730.5994 | 0.0000      |
| 7935.7019               | 6221.7750   | 310.3257   | -1713.9269  |
| 309.9656                | 89.9790     | 68.0657    | 511540.4688 |
|                         |             |            | -16.5495    |



Supplementary Text 6

-16.5631  
 [19855]ENERGY: 15530000      3279.3581      5384.1827      5478.2286  
 309.7731      -14370.8105      -1750.6895      0.0000      0.0000  
 7894.4718      6224.5143      308.7134      -1669.9575      6285.3426  
 309.7923      309.1316      274.4000      511540.4688      -11.8909  
 -11.8877  
 [19891]ENERGY: 15540000      3274.5905      5396.7215      5453.3728  
 353.8761      -14316.4289      -1767.4623      0.0000      0.0000  
 7827.8195      6222.4892      306.1070      -1605.3303      6285.2121  
 309.7937      49.5278      -58.2825      511540.4688      -14.6287  
 -14.6527  
 [19941]ENERGY: 15550000      3213.2640      5379.7821      5424.1097  
 341.0864      -14379.2513      -1723.9066      0.0000      0.0000  
 7962.8475      6217.9319      311.3873      -1744.9156      6284.3112  
 309.8715      156.1322      43.9754      511540.4688      -13.6207  
 -13.5890  
 [19977]ENERGY: 15560000      3275.7181      5298.7459      5479.8188  
 363.2500      -14368.4854      -1719.0261      0.0000      0.0000  
 7892.0865      6222.1077      308.6202      -1669.9788      6285.6107  
 310.1170      -106.2680      -141.5904      511540.4688      -9.9818  
 -10.0006  
 [20027]ENERGY: 15570000      3214.2276      5345.1602      5471.8841  
 284.5479      -14321.8853      -1688.8358      0.0000      0.0000  
 7915.8930      6220.9917      309.5511      -1694.9014      6282.9563  
 309.9693      93.0820      2.7416      511540.4688      -13.5210  
 -13.4917  
 [20063]ENERGY: 15580000      3328.9589      5335.2814      5452.7987  
 323.8268      -14289.1063      -1825.5863      0.0000      0.0000  
 7896.2906      6222.4639      308.7846      -1673.8267      6284.4473  
 309.7986      -239.2682      -123.7123      511540.4688      -17.5177  
 -17.5273  
 [20113]ENERGY: 15590000      3267.8612      5542.8073      5416.5807  
 320.6411      -14465.9707      -1767.9935      0.0000      0.0000  
 7907.4479      6221.3740      309.2209      -1686.0739      6284.0503  
 309.7764      156.6147      79.0894      511540.4688      -13.7845  
 -13.8134  
 [20152]ENERGY: 15600000      3243.9770      5421.0320      5435.6526  
 328.9720      -14435.1231      -1695.1994      0.0000      0.0000  
 7921.5966      6220.9077      309.7742      -1700.6889      6284.4529  
 309.9997      260.2392      187.1508      511540.4688      -14.9517  
 -14.9506  
 [20202]ENERGY: 15610000      3221.6362      5397.8212      5496.9466  
 305.8662      -14412.3699      -1643.8486      0.0000      0.0000  
 7855.3142      6221.3657      307.1822      -1633.9485      6285.4982  
 309.8900      116.9347      74.1954      511540.4688      -12.7780  
 -12.7534  
 [20238]ENERGY: 15620000      3276.7828      5361.3421      5466.8699  
 342.8578      -14438.1026      -1686.1974      0.0000      0.0000  
 7896.6561      6220.2087      308.7989      -1676.4474      6285.7723  
 309.6898      249.6057      210.9944      511540.4688      -15.0635  
 -15.0628  
 [20288]ENERGY: 15630000      3288.8018      5456.6095      5434.6171  
 310.0899      -14373.2600      -1725.0485      0.0000      0.0000  
 7830.1153      6221.9251      306.1968      -1608.1902      6285.8748

## Supplementary Text 6

|                         |             |            |             |           |
|-------------------------|-------------|------------|-------------|-----------|
| 309.8665                | -183.1219   | -175.1682  | 511540.4688 | -15.4098  |
| -15.4232                |             |            |             |           |
| [20324]ENERGY: 15640000 | 3253.1814   | 5333.6582  | 5484.5098   |           |
| 334.6150                | -14416.2837 | -1730.4846 | 0.0000      | 0.0000    |
| 7965.9300               | 6225.1261   | 311.5078   | -1740.8039  | 6287.8366 |
| 309.8074                | -59.8849    | 20.8978    | 511540.4688 | -10.8349  |
| -10.8340                |             |            |             |           |
| [20374]ENERGY: 15650000 | 3254.4649   | 5294.2853  | 5447.0937   |           |
| 340.5118                | -14370.5624 | -1724.2550 | 0.0000      | 0.0000    |
| 7982.1028               | 6223.6411   | 312.1403   | -1758.4617  | 6287.5322 |
| 309.8860                | -5.4118     | 17.7653    | 511540.4688 | -16.3767  |
| -16.3658                |             |            |             |           |
| [20410]ENERGY: 15660000 | 3173.7566   | 5419.8932  | 5482.8594   |           |
| 313.7068                | -14376.6570 | -1701.9498 | 0.0000      | 0.0000    |
| 7910.1030               | 6221.7123   | 309.3247   | -1688.3907  | 6287.4995 |
| 310.1512                | 32.8698     | 18.4167    | 511540.4688 | -9.2508   |
| -9.2620                 |             |            |             |           |
| [20460]ENERGY: 15670000 | 3331.5170   | 5312.5161  | 5471.9554   |           |
| 322.2738                | -14412.9690 | -1726.5254 | 0.0000      | 0.0000    |
| 7923.5473               | 6222.3153   | 309.8504   | -1701.2320  | 6286.7166 |
| 310.1299                | 65.6053     | 33.6075    | 511540.4688 | -12.4189  |
| -12.4206                |             |            |             |           |
| [20496]ENERGY: 15680000 | 3254.4787   | 5384.6345  | 5413.8790   |           |
| 324.7114                | -14409.8449 | -1728.2516 | 0.0000      | 0.0000    |
| 7981.2852               | 6220.8923   | 312.1083   | -1760.3929  | 6287.9140 |
| 310.0346                | -13.6789    | -38.1177   | 511540.4688 | -14.9909  |
| -14.9612                |             |            |             |           |
| [20546]ENERGY: 15690000 | 3271.6374   | 5384.1378  | 5426.8052   |           |
| 329.3687                | -14414.9945 | -1749.9552 | 0.0000      | 0.0000    |
| 7976.3611               | 6223.3605   | 311.9157   | -1753.0006  | 6286.9232 |
| 309.9308                | 7.9361      | 40.0754    | 511540.4688 | -10.7798  |
| -10.7950                |             |            |             |           |
| [20585]ENERGY: 15700000 | 3333.4308   | 5329.0985  | 5443.5167   |           |
| 312.4971                | -14418.0126 | -1739.7681 | 0.0000      | 0.0000    |
| 7961.5843               | 6222.3466   | 311.3379   | -1739.2377  | 6288.3304 |
| 310.0935                | 82.2963     | -105.8313  | 511540.4688 | -15.9352  |
| -15.9569                |             |            |             |           |
| [20635]ENERGY: 15710000 | 3244.3242   | 5403.6743  | 5469.2056   |           |
| 335.6424                | -14504.0590 | -1626.9825 | 0.0000      | 0.0000    |
| 7901.1097               | 6222.9147   | 308.9730   | -1678.1950  | 6287.2410 |
| 309.9948                | 113.3659    | 30.4126    | 511540.4688 | -10.0384  |
| -10.0224                |             |            |             |           |
| [20671]ENERGY: 15720000 | 3295.3272   | 5390.0154  | 5445.0795   |           |
| 331.2902                | -14423.5106 | -1724.2369 | 0.0000      | 0.0000    |
| 7908.5483               | 6222.5132   | 309.2639   | -1686.0351  | 6287.9301 |
| 309.9425                | -42.9401    | -94.3797   | 511540.4688 | -11.8713  |
| -11.8776                |             |            |             |           |
| [20721]ENERGY: 15730000 | 3286.6049   | 5356.4226  | 5462.6398   |           |
| 311.9611                | -14311.4219 | -1771.2762 | 0.0000      | 0.0000    |
| 7892.0279               | 6226.9583   | 308.6179   | -1665.0696  | 6288.4940 |
| 309.9313                | -113.1330   | -69.3803   | 511540.4688 | -20.4680  |
| -20.4589                |             |            |             |           |
| [20757]ENERGY: 15740000 | 3265.0266   | 5347.2652  | 5472.6808   |           |
| 325.1370                | -14373.0152 | -1683.7788 | 0.0000      | 0.0000    |

## Supplementary Text 6

|                         |             |            |             |           |
|-------------------------|-------------|------------|-------------|-----------|
| 7874.9111               | 6228.2268   | 307.9485   | -1646.6843  | 6289.1125 |
| 309.9674                | -212.8902   | -159.9462  | 511540.4688 | -13.5592  |
| -13.5499                |             |            |             |           |
| [20807]ENERGY: 15750000 | 3282.5765   | 5342.9517  | 5406.6706   |           |
| 316.3270                | -14355.3335 | -1714.0861 | 0.0000      | 0.0000    |
| 7943.8220               | 6222.9282   | 310.6433   | -1720.8938  | 6289.2920 |
| 309.9358                | 263.0330    | 176.8333   | 511540.4688 | -19.1398  |
| -19.1274                |             |            |             |           |
| [20843]ENERGY: 15760000 | 3361.1970   | 5342.9601  | 5457.7116   |           |
| 314.5305                | -14440.0608 | -1717.1287 | 0.0000      | 0.0000    |
| 7904.9036               | 6224.1132   | 309.1214   | -1680.7904  | 6287.8693 |
| 309.9204                | -142.6267   | -120.3305  | 511540.4688 | -11.6410  |
| -11.6582                |             |            |             |           |
| [20893]ENERGY: 15770000 | 3295.7794   | 5398.7406  | 5464.9603   |           |
| 326.0002                | -14375.6787 | -1759.9059 | 0.0000      | 0.0000    |
| 7875.4871               | 6225.3830   | 307.9710   | -1650.1040  | 6288.5849 |
| 310.0516                | -149.5169   | -83.8490   | 511540.4688 | -15.9107  |
| -15.9106                |             |            |             |           |
| [20929]ENERGY: 15780000 | 3277.4384   | 5353.3234  | 5495.5964   |           |
| 303.3137                | -14447.4210 | -1679.3192 | 0.0000      | 0.0000    |
| 7922.5684               | 6225.5002   | 309.8122   | -1697.0682  | 6288.1566 |
| 309.8605                | -179.6648   | -114.3089  | 511540.4688 | -15.3443  |
| -15.3325                |             |            |             |           |
| [20979]ENERGY: 15790000 | 3252.5901   | 5334.7918  | 5440.4170   |           |
| 339.6176                | -14392.9335 | -1751.1282 | 0.0000      | 0.0000    |
| 7997.7716               | 6221.1264   | 312.7530   | -1776.6451  | 6288.5283 |
| 309.9679                | 149.7189    | 183.5352   | 511540.4688 | -14.3307  |
| -14.3596                |             |            |             |           |
| [21018]ENERGY: 15800000 | 3273.2724   | 5245.6633  | 5467.0985   |           |
| 332.4811                | -14380.8657 | -1754.0102 | 0.0000      | 0.0000    |
| 8037.5265               | 6221.1659   | 314.3076   | -1816.3606  | 6288.1552 |
| 310.1332                | 43.5517     | -100.9067  | 511540.4688 | -16.2060  |
| -16.1926                |             |            |             |           |
| [21068]ENERGY: 15810000 | 3365.9760   | 5457.5470  | 5427.5689   |           |
| 303.8845                | -14407.7244 | -1744.8569 | 0.0000      | 0.0000    |
| 7823.1013               | 6225.4964   | 305.9225   | -1597.6050  | 6288.2721 |
| 309.9293                | 107.9791    | 29.8495    | 511540.4688 | -11.2729  |
| -11.2945                |             |            |             |           |
| [21104]ENERGY: 15820000 | 3246.7562   | 5383.6805  | 5474.3493   |           |
| 321.1267                | -14415.1657 | -1738.9459 | 0.0000      | 0.0000    |
| 7952.3231               | 6224.1242   | 310.9757   | -1728.1989  | 6288.0417 |
| 310.0195                | -132.3357   | -120.8904  | 511540.4688 | -16.1151  |
| -16.0840                |             |            |             |           |
| [21154]ENERGY: 15830000 | 3288.6187   | 5298.4165  | 5463.5876   |           |
| 317.9051                | -14417.4878 | -1668.4146 | 0.0000      | 0.0000    |
| 7942.3288               | 6224.9542   | 310.5849   | -1717.3745  | 6288.3441 |
| 310.0460                | 18.9850     | -27.2324   | 511540.4688 | -12.5358  |
| -12.5715                |             |            |             |           |
| [21190]ENERGY: 15840000 | 3271.4241   | 5383.4918  | 5447.3416   |           |
| 339.6693                | -14409.5202 | -1704.1790 | 0.0000      | 0.0000    |
| 7897.0257               | 6225.2533   | 308.8133   | -1671.7724  | 6288.7533 |
| 310.0190                | 28.7108     | -97.2538   | 511540.4688 | -11.2551  |
| -11.2350                |             |            |             |           |
| [21240]ENERGY: 15850000 | 3230.7579   | 5382.4439  | 5485.4210   |           |

## Supplementary Text 6

|                         |             |            |             |           |
|-------------------------|-------------|------------|-------------|-----------|
| 325.6390                | -14363.1982 | -1776.1708 | 0.0000      | 0.0000    |
| 7939.1335               | 6224.0263   | 310.4599   | -1715.1073  | 6289.2679 |
| 309.9719                | -0.0811     | -67.1757   | 511540.4688 | -16.4293  |
| -16.4449                |             |            |             |           |
| [21276]ENERGY: 15860000 | 3307.8627   | 5334.8381  | 5403.7273   |           |
| 305.9566                | -14396.4871 | -1670.8889 | 0.0000      | 0.0000    |
| 7940.0887               | 6225.0973   | 310.4973   | -1714.9914  | 6288.8603 |
| 310.0758                | 204.0769    | 192.5066   | 511540.4688 | -11.0437  |
| -11.0355                |             |            |             |           |
| [21326]ENERGY: 15870000 | 3251.9544   | 5390.3736  | 5480.5257   |           |
| 328.8498                | -14406.6540 | -1678.9351 | 0.0000      | 0.0000    |
| 7857.2329               | 6223.3474   | 307.2572   | -1633.8856  | 6288.1319 |
| 310.1575                | 147.1498    | 70.5288    | 511540.4688 | -12.4439  |
| -12.4306                |             |            |             |           |
| [21362]ENERGY: 15880000 | 3256.4133   | 5454.0712  | 5444.2938   |           |
| 358.5456                | -14465.1723 | -1711.7190 | 0.0000      | 0.0000    |
| 7891.0461               | 6227.4787   | 308.5795   | -1663.5674  | 6288.7869 |
| 310.2540                | -71.7367    | -111.8265  | 511540.4688 | -14.6472  |
| -14.6405                |             |            |             |           |
| [21412]ENERGY: 15890000 | 3206.8890   | 5383.1151  | 5413.8871   |           |
| 327.3458                | -14395.1699 | -1682.4875 | 0.0000      | 0.0000    |
| 7972.8147               | 6226.3944   | 311.7770   | -1746.4203  | 6289.0357 |
| 310.1233                | 229.4026    | 85.4802    | 511540.4688 | -12.0891  |
| -12.0950                |             |            |             |           |
| [21451]ENERGY: 15900000 | 3210.3945   | 5304.7290  | 5449.6441   |           |
| 336.1397                | -14327.7887 | -1771.1734 | 0.0000      | 0.0000    |
| 8019.6743               | 6221.6194   | 313.6095   | -1798.0549  | 6288.4271 |
| 310.2352                | 135.8377    | 148.4652   | 511540.4688 | -9.4412   |
| -9.4544                 |             |            |             |           |
| [21501]ENERGY: 15910000 | 3348.2216   | 5393.0860  | 5463.2054   |           |
| 327.5010                | -14408.1363 | -1720.5711 | 0.0000      | 0.0000    |
| 7826.2869               | 6229.5934   | 306.0471   | -1596.6935  | 6290.4082 |
| 310.0246                | -171.2745   | -154.8294  | 511540.4688 | -15.6957  |
| -15.6813                |             |            |             |           |
| [21537]ENERGY: 15920000 | 3294.2820   | 5407.1714  | 5459.2669   |           |
| 339.5923                | -14432.0346 | -1753.8095 | 0.0000      | 0.0000    |
| 7909.7580               | 6224.2264   | 309.3112   | -1685.5315  | 6289.9686 |
| 310.1094                | 24.8684     | -20.5332   | 511540.4688 | -13.2991  |
| -13.3285                |             |            |             |           |
| [21587]ENERGY: 15930000 | 3368.5826   | 5327.2841  | 5396.7028   |           |
| 322.1627                | -14380.7496 | -1724.4899 | 0.0000      | 0.0000    |
| 7916.4324               | 6225.9251   | 309.5722   | -1690.5073  | 6289.9362 |
| 309.9897                | -165.7181   | -103.8572  | 511540.4688 | -15.8165  |
| -15.7806                |             |            |             |           |
| [21623]ENERGY: 15940000 | 3257.9056   | 5379.9778  | 5417.4736   |           |
| 314.9355                | -14255.3879 | -1800.6188 | 0.0000      | 0.0000    |
| 7915.8330               | 6230.1188   | 309.5488   | -1685.7142  | 6290.2821 |
| 309.9499                | 3.4391      | -158.3102  | 511540.4688 | -15.6294  |
| -15.6284                |             |            |             |           |
| [21673]ENERGY: 15950000 | 3307.0488   | 5334.1854  | 5468.4847   |           |
| 315.7108                | -14364.6133 | -1722.9470 | 0.0000      | 0.0000    |
| 7891.6889               | 6229.5583   | 308.6046   | -1662.1307  | 6289.7851 |
| 310.0307                | 8.7634      | -49.8228   | 511540.4688 | -13.6187  |
| -13.6279                |             |            |             |           |

## Supplementary Text 6

|                         |             |            |             |
|-------------------------|-------------|------------|-------------|
| [21709]ENERGY: 15960000 | 3285.2657   | 5362.7383  | 5446.4456   |
| 355.9589                | -14497.8981 | -1685.7603 | 0.0000      |
| 7955.7624               | 6222.5126   | 311.1102   | -1733.2498  |
| 310.0761                | 41.5940     | -10.9101   | 511540.4688 |
| -12.9114                |             |            | -12.9185    |
| [21759]ENERGY: 15970000 | 3274.0384   | 5400.9112  | 5464.7464   |
| 323.8062                | -14390.7891 | -1765.6782 | 0.0000      |
| 7921.1293               | 6228.1643   | 309.7559   | -1692.9650  |
| 310.2219                | -78.7921    | -99.9262   | 511540.4688 |
| -9.8678                 |             |            | -9.8561     |
| [21795]ENERGY: 15980000 | 3257.7154   | 5371.6567  | 5434.7907   |
| 331.0665                | -14486.5704 | -1635.2465 | 0.0000      |
| 7952.1381               | 6225.5506   | 310.9685   | -1726.5875  |
| 310.1427                | -30.3108    | 112.8377   | 511540.4688 |
| -14.4316                |             |            | -14.4466    |
| [21845]ENERGY: 15990000 | 3217.5559   | 5342.8970  | 5427.8068   |
| 313.0780                | -14376.9931 | -1670.2230 | 0.0000      |
| 7970.3387               | 6224.4602   | 311.6802   | -1745.8785  |
| 310.0160                | 33.1794     | 131.6130   | 511540.4688 |
| -9.2573                 |             |            | -9.2614     |
| [21884]ENERGY: 16000000 | 3207.6387   | 5380.6752  | 5470.7101   |
| 321.7231                | -14457.8130 | -1715.3678 | 0.0000      |
| 8013.5006               | 6221.0669   | 313.3681   | -1792.4337  |
| 310.0659                | 148.0621    | 78.9647    | 511540.4688 |
| -13.2589                |             |            | -13.2537    |
| [21934]ENERGY: 16010000 | 3340.5920   | 5378.0842  | 5485.7306   |
| 345.8847                | -14439.1670 | -1679.5039 | 0.0000      |
| 7801.1473               | 6232.7681   | 305.0640   | -1568.3792  |
| 309.9323                | -5.8998     | -14.0630   | 511540.4688 |
| -17.6854                |             |            | -17.6930    |
| [21970]ENERGY: 16020000 | 3282.4687   | 5347.8273  | 5412.6220   |
| 333.6556                | -14331.2741 | -1782.8676 | 0.0000      |
| 7965.1511               | 6227.5831   | 311.4774   | -1737.5680  |
| 309.8192                | -11.8985    | -73.9524   | 511540.4688 |
| -10.7812                |             |            | -10.7629    |
| [22020]ENERGY: 16030000 | 3260.6163   | 5356.9550  | 5491.1894   |
| 353.1484                | -14383.3289 | -1752.8589 | 0.0000      |
| 7902.6591               | 6228.3804   | 309.0336   | -1674.2787  |
| 309.9341                | 17.6756     | -67.0749   | 511540.4688 |
| -13.4906                |             |            | -13.4899    |
| [22056]ENERGY: 16040000 | 3256.9889   | 5318.7627  | 5428.1432   |
| 320.0914                | -14300.9944 | -1765.8430 | 0.0000      |
| 7968.5580               | 6225.7069   | 311.6106   | -1742.8511  |
| 309.9197                | -44.3920    | -185.5568  | 511540.4688 |
| -10.8434                |             |            | -10.8505    |
| [22106]ENERGY: 16050000 | 3297.7544   | 5359.9191  | 5429.6676   |
| 327.5381                | -14382.8894 | -1758.6794 | 0.0000      |
| 7954.5960               | 6227.9063   | 311.0646   | -1726.6897  |
| 309.9004                | -28.2896    | -114.5660  | 511540.4688 |
| -12.0718                |             |            | -12.0634    |
| [22142]ENERGY: 16060000 | 3209.4308   | 5433.1115  | 5430.9059   |
| 336.4324                | -14448.0751 | -1662.8273 | 0.0000      |
| 7930.1040               | 6229.0822   | 310.1068   | -1701.0219  |
| 309.8727                | 16.4862     | 13.2297    | 511540.4688 |
|                         |             |            | -8.2953     |

## Supplementary Text 6

-8.3122

[22192]ENERGY: 16070000 3285.5180 5471.9001 5458.1500  
325.3213 -14493.5248 -1707.9695 0.0000 0.0000  
7888.3949 6227.7899 308.4758 -1660.6050 6292.5474  
310.1005 -87.4982 -22.6680 511540.4688 -10.2804  
-10.2528

[22228]ENERGY: 16080000 3251.2018 5354.7492 5440.2701  
341.1743 -14388.1902 -1726.5398 0.0000 0.0000  
7957.1024 6229.7678 311.1626 -1727.3346 6293.2912  
310.0727 -111.9997 -79.2591 511540.4688 -12.0283  
-12.0395

[22278]ENERGY: 16090000 3207.3385 5408.7423 5478.0730  
324.6985 -14310.9925 -1768.0156 0.0000 0.0000  
7892.1423 6231.9864 308.6223 -1660.1559 6293.7740  
310.1255 158.6458 53.4356 511540.4688 -12.7129  
-12.7190

[22317]ENERGY: 16100000 3270.8794 5440.8691 5455.2112  
336.8962 -14432.4323 -1788.8453 0.0000 0.0000  
7948.4093 6230.9877 310.8227 -1717.4216 6294.9858  
310.0688 6.7564 -163.3296 511540.4688 -11.6204  
-11.6254

[22367]ENERGY: 16110000 3309.9815 5432.8744 5410.9721  
324.3986 -14324.8846 -1736.4543 0.0000 0.0000  
7822.0698 6238.9577 305.8822 -1583.1122 6294.8352  
310.2961 -19.4250 -79.3191 511540.4688 -13.4220  
-13.4079

[22403]ENERGY: 16120000 3355.6251 5399.9797 5411.2083  
347.4172 -14431.8848 -1785.5277 0.0000 0.0000  
7933.7206 6230.5384 310.2483 -1703.1822 6294.1719  
310.1346 -55.3076 -110.2667 511540.4688 -7.2171  
-7.2047

[22453]ENERGY: 16130000 3377.6291 5448.5039 5431.6594  
315.1218 -14411.7481 -1788.2788 0.0000 0.0000  
7856.4768 6229.3640 307.2276 -1627.1128 6295.3923  
310.1601 -254.1149 -337.7079 511540.4688 -15.6059  
-15.6247

[22489]ENERGY: 16140000 3275.7031 5427.7051 5395.7943  
330.5952 -14363.7939 -1760.7675 0.0000 0.0000  
7924.0043 6229.2407 309.8683 -1694.7636 6295.4678  
310.1988 -73.7138 -10.3311 511540.4688 -12.4180  
-12.4267

[22539]ENERGY: 16150000 3306.3012 5331.6897 5426.6541  
329.8068 -14355.8270 -1738.7490 0.0000 0.0000  
7934.3067 6234.1825 310.2712 -1700.1242 6296.8342  
310.0454 -115.1973 -152.6738 511540.4688 -12.0525  
-12.0447

[22575]ENERGY: 16160000 3298.0804 5450.1095 5400.3729  
344.0576 -14398.9511 -1796.6099 0.0000 0.0000  
7935.7295 6232.7889 310.3268 -1702.9406 6296.7232  
310.1399 -139.9725 -87.0474 511540.4688 -13.0553  
-13.0274

[22625]ENERGY: 16170000 3286.5678 5394.4277 5443.5180  
345.9933 -14447.6107 -1716.1423 0.0000 0.0000  
7924.9341 6231.6880 309.9047 -1693.2462 6297.5077

## Supplementary Text 6

|                         |             |            |             |           |
|-------------------------|-------------|------------|-------------|-----------|
| 310.2219                | 136.8021    | 142.1915   | 511540.4688 | -9.7542   |
| -9.7664                 |             |            |             |           |
| [22661]ENERGY: 16180000 | 3318.8147   | 5510.4032  | 5424.2867   |           |
| 318.6574                | -14478.1206 | -1675.3841 | 0.0000      | 0.0000    |
| 7812.9430               | 6231.6004   | 305.5253   | -1581.3427  | 6297.4283 |
| 310.1199                | 66.1033     | 101.0597   | 511540.4688 | -14.5942  |
| -14.5885                |             |            |             |           |
| [22711]ENERGY: 16190000 | 3310.7221   | 5388.3889  | 5394.1518   |           |
| 325.4624                | -14375.8847 | -1781.9392 | 0.0000      | 0.0000    |
| 7971.3495               | 6232.2510   | 311.7197   | -1739.0986  | 6296.1868 |
| 310.0558                | -150.9141   | -204.3823  | 511540.4688 | -14.4066  |
| -14.4404                |             |            |             |           |
| [22750]ENERGY: 16200000 | 3200.6325   | 5414.9605  | 5425.6677   |           |
| 303.6684                | -14381.9638 | -1665.9759 | 0.0000      | 0.0000    |
| 7934.1370               | 6231.1263   | 310.2646   | -1703.0107  | 6295.0799 |
| 310.2736                | 121.4981    | -15.8022   | 511540.4688 | -13.8591  |
| -13.8615                |             |            |             |           |
| [22800]ENERGY: 16210000 | 3246.6969   | 5381.9811  | 5481.9056   |           |
| 306.1597                | -14383.2741 | -1754.9910 | 0.0000      | 0.0000    |
| 7952.7169               | 6231.1950   | 310.9911   | -1721.5219  | 6297.3358 |
| 310.1427                | 5.2344      | -117.5853  | 511540.4688 | -13.2848  |
| -13.2745                |             |            |             |           |
| [22836]ENERGY: 16220000 | 3261.9435   | 5390.7726  | 5443.7171   |           |
| 333.9207                | -14375.5574 | -1704.7903 | 0.0000      | 0.0000    |
| 7884.6751               | 6234.6813   | 308.3303   | -1649.9938  | 6296.9583 |
| 310.2494                | 159.9688    | 82.7407    | 511540.4688 | -14.9998  |
| -15.0001                |             |            |             |           |
| [22886]ENERGY: 16230000 | 3325.3706   | 5362.7381  | 5462.0273   |           |
| 332.0266                | -14441.4111 | -1716.2953 | 0.0000      | 0.0000    |
| 7906.0853               | 6230.5414   | 309.1676   | -1675.5439  | 6296.3064 |
| 310.0096                | 6.7122      | 19.9012    | 511540.4688 | -13.3770  |
| -13.3625                |             |            |             |           |
| [22922]ENERGY: 16240000 | 3353.8988   | 5301.7313  | 5423.2591   |           |
| 328.1192                | -14383.1785 | -1708.9785 | 0.0000      | 0.0000    |
| 7919.7749               | 6234.6263   | 309.7029   | -1685.1486  | 6296.6290 |
| 310.0929                | 172.4155    | 156.7677   | 511540.4688 | -12.0810  |
| -12.0734                |             |            |             |           |
| [22972]ENERGY: 16250000 | 3364.8937   | 5376.8916  | 5470.3402   |           |
| 323.0742                | -14443.6156 | -1815.1019 | 0.0000      | 0.0000    |
| 7953.7398               | 6230.2221   | 311.0311   | -1723.5178  | 6297.6169 |
| 310.0754                | -69.7337    | -79.4773   | 511540.4688 | -16.1900  |
| -16.2023                |             |            |             |           |
| [23008]ENERGY: 16260000 | 3327.7359   | 5402.1270  | 5457.6497   |           |
| 316.7598                | -14399.8493 | -1748.1797 | 0.0000      | 0.0000    |
| 7879.0990               | 6235.3424   | 308.1123   | -1643.7566  | 6298.8316 |
| 310.2327                | -16.6852    | -78.4476   | 511540.4688 | -13.1214  |
| -13.1347                |             |            |             |           |
| [23058]ENERGY: 16270000 | 3328.0492   | 5380.5718  | 5410.2881   |           |
| 300.4225                | -14356.8232 | -1786.1474 | 0.0000      | 0.0000    |
| 7953.4758               | 6229.8368   | 311.0208   | -1723.6390  | 6297.1554 |
| 310.1708                | -164.9351   | -291.4803  | 511540.4688 | -18.9363  |
| -18.9545                |             |            |             |           |
| [23094]ENERGY: 16280000 | 3319.2677   | 5429.8719  | 5444.3935   |           |
| 324.4683                | -14344.9695 | -1770.0196 | 0.0000      | 0.0000    |

## Supplementary Text 6

|                         |             |            |             |           |
|-------------------------|-------------|------------|-------------|-----------|
| 7834.0966               | 6237.1088   | 306.3525   | -1596.9878  | 6297.1865 |
| 310.2245                | -145.4665   | -180.8863  | 511540.4688 | -14.8266  |
| -14.8220                |             |            |             |           |
| [23144]ENERGY: 16290000 | 3319.8975   | 5470.3100  | 5438.5368   |           |
| 323.7693                | -14406.7810 | -1792.4685 | 0.0000      | 0.0000    |
| 7878.1149               | 6231.3790   | 308.0738   | -1646.7359  | 6297.3062 |
| 310.2953                | -2.9202     | -57.3953   | 511540.4688 | -11.9528  |
| -11.9306                |             |            |             |           |
| [23183]ENERGY: 16300000 | 3246.3131   | 5379.3647  | 5489.1937   |           |
| 314.0062                | -14404.8764 | -1727.7388 | 0.0000      | 0.0000    |
| 7937.7679               | 6234.0304   | 310.4065   | -1703.7375  | 6296.3682 |
| 310.3045                | -89.3568    | -195.6157  | 511540.4688 | -14.5033  |
| -14.4994                |             |            |             |           |
| [23233]ENERGY: 16310000 | 3338.9824   | 5494.4639  | 5438.5329   |           |
| 321.4916                | -14457.8347 | -1728.3598 | 0.0000      | 0.0000    |
| 7828.6219               | 6235.8982   | 306.1384   | -1592.7237  | 6297.2730 |
| 310.2504                | 75.0909     | -34.1130   | 511540.4688 | -10.3981  |
| -10.3952                |             |            |             |           |
| [23269]ENERGY: 16320000 | 3242.5756   | 5447.7328  | 5439.4475   |           |
| 334.8038                | -14448.4018 | -1707.0608 | 0.0000      | 0.0000    |
| 7921.2876               | 6230.3845   | 309.7621   | -1690.9030  | 6295.9596 |
| 310.2617                | -75.9624    | 42.3141    | 511540.4688 | -12.6955  |
| -12.6696                |             |            |             |           |
| [23319]ENERGY: 16330000 | 3287.5210   | 5436.1430  | 5425.1224   |           |
| 310.5839                | -14395.6744 | -1721.2219 | 0.0000      | 0.0000    |
| 7889.8710               | 6232.3451   | 308.5335   | -1657.5260  | 6296.8863 |
| 310.1168                | -70.4473    | -52.9124   | 511540.4688 | -12.2837  |
| -12.2922                |             |            |             |           |
| [23355]ENERGY: 16340000 | 3365.2790   | 5333.0018  | 5447.1819   |           |
| 288.7601                | -14398.0622 | -1750.4819 | 0.0000      | 0.0000    |
| 7948.0888               | 6233.7674   | 310.8101   | -1714.3214  | 6296.8181 |
| 310.0554                | -295.3764   | -246.4255  | 511540.4688 | -12.6205  |
| -12.6206                |             |            |             |           |
| [23405]ENERGY: 16350000 | 3200.2951   | 5406.1956  | 5472.5964   |           |
| 323.8428                | -14422.7970 | -1708.5219 | 0.0000      | 0.0000    |
| 7962.4012               | 6234.0122   | 311.3698   | -1728.3890  | 6296.1089 |
| 310.1489                | 96.8154     | -14.6745   | 511540.4688 | -11.0835  |
| -11.1089                |             |            |             |           |
| [23441]ENERGY: 16360000 | 3306.6448   | 5391.5103  | 5479.0158   |           |
| 310.4136                | -14446.7866 | -1737.1428 | 0.0000      | 0.0000    |
| 7931.0240               | 6234.6792   | 310.1428   | -1696.3448  | 6296.1567 |
| 310.1982                | -91.7914    | -75.6544   | 511540.4688 | -10.0208  |
| -9.9956                 |             |            |             |           |
| [23491]ENERGY: 16370000 | 3263.5194   | 5366.6832  | 5430.8374   |           |
| 301.4444                | -14415.2662 | -1648.8060 | 0.0000      | 0.0000    |
| 7933.5010               | 6231.9132   | 310.2397   | -1701.5878  | 6296.2462 |
| 310.2435                | 117.3891    | 87.0628    | 511540.4688 | -14.7643  |
| -14.7788                |             |            |             |           |
| [23527]ENERGY: 16380000 | 3347.6598   | 5325.3879  | 5489.8535   |           |
| 338.1017                | -14459.2611 | -1730.9576 | 0.0000      | 0.0000    |
| 7922.2519               | 6233.0361   | 309.7998   | -1689.2158  | 6295.8614 |
| 310.4173                | -113.1824   | -74.9915   | 511540.4688 | -12.1706  |
| -12.1758                |             |            |             |           |
| [23577]ENERGY: 16390000 | 3280.7887   | 5363.9913  | 5414.5231   |           |



## Supplementary Text 6

|                         |             |            |             |           |
|-------------------------|-------------|------------|-------------|-----------|
| 304.7390                | -14466.5885 | -1653.5707 | 0.0000      | 0.0000    |
| 7990.0287               | 6233.9117   | 312.4502   | -1756.1171  | 6296.2131 |
| 310.4826                | -115.4394   | -36.9903   | 511540.4688 | -12.3166  |
| -12.3093                |             |            |             |           |
| [23616]ENERGY: 16400000 | 3377.7087   | 5356.1227  | 5417.7505   |           |
| 316.4663                | -14356.1900 | -1737.6640 | 0.0000      | 0.0000    |
| 7859.7591               | 6233.9534   | 307.3560   | -1625.8058  | 6297.2991 |
| 310.5399                | -70.0886    | -14.7916   | 511540.4688 | -11.7621  |
| -11.7483                |             |            |             |           |
| [23666]ENERGY: 16410000 | 3277.3121   | 5406.8885  | 5515.7795   |           |
| 312.0256                | -14486.8765 | -1678.0105 | 0.0000      | 0.0000    |
| 7889.2319               | 6236.3505   | 308.5085   | -1652.8813  | 6296.7734 |
| 310.6289                | 30.2264     | 1.4162     | 511540.4688 | -9.1295   |
| -9.1535                 |             |            |             |           |
| [23702]ENERGY: 16420000 | 3250.6301   | 5459.2125  | 5457.3594   |           |
| 312.7813                | -14355.0596 | -1785.2015 | 0.0000      | 0.0000    |
| 7894.9732               | 6234.6954   | 308.7330   | -1660.2778  | 6297.8808 |
| 310.6069                | -180.0249   | -180.7482  | 511540.4688 | -18.3841  |
| -18.3803                |             |            |             |           |
| [23752]ENERGY: 16430000 | 3254.9102   | 5377.1893  | 5474.5356   |           |
| 331.4398                | -14455.8209 | -1676.3260 | 0.0000      | 0.0000    |
| 7928.0103               | 6233.9383   | 310.0250   | -1694.0720  | 6296.7863 |
| 310.5263                | 244.4820    | 118.2622   | 511540.4688 | -11.7614  |
| -11.7756                |             |            |             |           |
| [23788]ENERGY: 16440000 | 3347.7380   | 5438.2783  | 5440.1745   |           |
| 309.9368                | -14296.8552 | -1796.0386 | 0.0000      | 0.0000    |
| 7794.0102               | 6237.2441   | 304.7849   | -1556.7661  | 6297.0998 |
| 310.3852                | 0.7961      | -84.9913   | 511540.4688 | -9.2370   |
| -9.2073                 |             |            |             |           |
| [23838]ENERGY: 16450000 | 3243.3870   | 5445.2368  | 5476.7865   |           |
| 311.6249                | -14445.4294 | -1683.1854 | 0.0000      | 0.0000    |
| 7884.5654               | 6232.9858   | 308.3261   | -1651.5796  | 6297.0723 |
| 310.3923                | 31.4151     | 37.8789    | 511540.4688 | -12.0675  |
| -12.0904                |             |            |             |           |
| [23874]ENERGY: 16460000 | 3295.5702   | 5361.9076  | 5457.4616   |           |
| 305.7920                | -14360.2156 | -1716.7855 | 0.0000      | 0.0000    |
| 7891.3938               | 6235.1241   | 308.5931   | -1656.2697  | 6297.7732 |
| 310.4269                | 41.8043     | 44.9907    | 511540.4688 | -14.5176  |
| -14.4807                |             |            |             |           |
| [23924]ENERGY: 16470000 | 3307.5187   | 5393.9044  | 5473.1932   |           |
| 350.1706                | -14401.8867 | -1726.8928 | 0.0000      | 0.0000    |
| 7840.1302               | 6236.1377   | 306.5884   | -1603.9925  | 6297.3232 |
| 310.6820                | -79.8760    | 39.5551    | 511540.4688 | -10.0845  |
| -10.1231                |             |            |             |           |
| [23960]ENERGY: 16480000 | 3294.8555   | 5427.6446  | 5426.0415   |           |
| 327.3677                | -14372.2414 | -1773.0620 | 0.0000      | 0.0000    |
| 7906.8061               | 6237.4120   | 309.1958   | -1669.3941  | 6299.3461 |
| 310.5869                | 188.1132    | 74.1875    | 511540.4688 | -14.5947  |
| -14.5844                |             |            |             |           |
| [24010]ENERGY: 16490000 | 3322.3263   | 5373.6626  | 5506.8185   |           |
| 331.1341                | -14413.6333 | -1686.0843 | 0.0000      | 0.0000    |
| 7800.0639               | 6234.2878   | 305.0216   | -1565.7761  | 6298.5431 |
| 310.6021                | 236.9522    | 116.0523   | 511540.4688 | -9.2963   |
| -9.2901                 |             |            |             |           |

## Supplementary Text 6

|                         |             |            |             |
|-------------------------|-------------|------------|-------------|
| [24049]ENERGY: 16500000 | 3357.6404   | 5427.4424  | 5469.1162   |
| 342.3489                | -14440.6353 | -1765.5530 | 0.0000      |
| 7847.6355               | 6237.9951   | 306.8819   | -1609.6404  |
| 310.7559                | -155.1723   | -199.6807  | 511540.4688 |
| -13.3841                |             |            | -13.3822    |
| [24099]ENERGY: 16510000 | 3222.4675   | 5371.3379  | 5459.5162   |
| 344.5958                | -14420.1982 | -1698.0815 | 0.0000      |
| 7951.9903               | 6231.6281   | 310.9627   | -1720.3623  |
| 310.6702                | 92.0029     | 88.5218    | 511540.4688 |
| -16.2544                |             |            | -16.2370    |
| [24135]ENERGY: 16520000 | 3252.6901   | 5464.6500  | 5465.9591   |
| 335.4417                | -14445.7734 | -1756.4896 | 0.0000      |
| 7919.8528               | 6236.3307   | 309.7060   | -1683.5221  |
| 310.7380                | 42.9660     | -60.3580   | 511540.4688 |
| -8.0819                 |             |            | -8.0901     |
| [24185]ENERGY: 16530000 | 3287.8674   | 5450.0372  | 5471.3690   |
| 317.2229                | -14436.0865 | -1685.3917 | 0.0000      |
| 7831.0468               | 6236.0651   | 306.2332   | -1594.9817  |
| 310.6531                | -44.4772    | -93.8199   | 511540.4688 |
| -15.9135                |             |            | -15.9100    |
| [24221]ENERGY: 16540000 | 3366.5635   | 5297.9350  | 5507.6204   |
| 348.3329                | -14399.3408 | -1773.5438 | 0.0000      |
| 7887.9230               | 6235.4902   | 308.4574   | -1652.4328  |
| 310.5338                | -133.7822   | -120.8906  | 511540.4688 |
| -15.5198                |             |            | -15.5287    |
| [24271]ENERGY: 16550000 | 3309.9894   | 5366.5139  | 5432.7986   |
| 328.7547                | -14399.0249 | -1754.4839 | 0.0000      |
| 7949.5228               | 6234.0706   | 310.8662   | -1715.4522  |
| 310.4578                | -30.2052    | -121.6182  | 511540.4688 |
| -21.2418                |             |            | -21.2390    |
| [24307]ENERGY: 16560000 | 3342.0007   | 5380.1848  | 5498.9722   |
| 344.7877                | -14402.6245 | -1802.9979 | 0.0000      |
| 7876.1287               | 6236.4517   | 307.9961   | -1639.6771  |
| 310.5418                | -57.6097    | 8.2490     | 511540.4688 |
| -13.9727                |             |            | -13.9891    |
| [24357]ENERGY: 16570000 | 3262.7905   | 5317.6760  | 5488.7916   |
| 324.9481                | -14382.9087 | -1756.3270 | 0.0000      |
| 7980.6772               | 6235.6477   | 312.0845   | -1745.0295  |
| 310.5275                | 94.2564     | 40.6828    | 511540.4688 |
| -18.5475                |             |            | -18.5443    |
| [24393]ENERGY: 16580000 | 3325.4338   | 5443.4679  | 5442.4598   |
| 306.5522                | -14353.2908 | -1818.9053 | 0.0000      |
| 7893.7318               | 6239.4493   | 308.6845   | -1654.2825  |
| 310.3240                | -222.9135   | -231.3171  | 511540.4688 |
| -13.0960                |             |            | -13.1050    |
| [24443]ENERGY: 16590000 | 3222.3604   | 5436.7149  | 5437.7932   |
| 332.0543                | -14440.4108 | -1710.3193 | 0.0000      |
| 7962.2715               | 6240.4642   | 311.3648   | -1721.8074  |
| 310.3531                | 73.3750     | 154.0892   | 511540.4688 |
| -16.1177                |             |            | -16.0992    |
| [24482]ENERGY: 16600000 | 3252.8778   | 5326.3832  | 5491.6223   |
| 318.8291                | -14327.3807 | -1766.6386 | 0.0000      |
| 7943.4941               | 6239.1872   | 310.6305   | -1704.3070  |
| 310.5767                | -44.2649    | -129.3380  | 511540.4688 |
|                         |             |            | -12.5271    |

Supplementary Text 6

-12.5363  
 [24532]ENERGY: 16610000      3348.9234      5338.7293      5445.1898  
 347.7237      -14443.1378      -1734.8815      0.0000      0.0000  
 7934.4337      6236.9805      310.2762      -1697.4531      6300.9780  
 310.5851      1.0601      44.9168      511540.4688      -14.9588  
 -14.9599  
 [24568]ENERGY: 16620000      3270.3227      5328.0850      5474.7376  
 289.8796      -14451.1646      -1699.6875      0.0000      0.0000  
 8020.3677      6232.5405      313.6366      -1787.8271      6299.4242  
 310.7339      155.6899      196.3861      511540.4688      -15.1722  
 -15.1608  
 [24618]ENERGY: 16630000      3335.1433      5381.9102      5461.1966  
 325.5266      -14414.5656      -1734.9059      0.0000      0.0000  
 7883.1057      6237.4110      308.2690      -1645.6947      6300.1232  
 310.6465      -242.7964      -241.6925      511540.4688      -10.4642  
 -10.4396  
 [24654]ENERGY: 16640000      3293.5794      5368.1464      5483.5025  
 345.5880      -14399.3351      -1738.8174      0.0000      0.0000  
 7888.2371      6240.9008      308.4696      -1647.3363      6300.4181  
 310.5647      97.0724      -22.7292      511540.4688      -14.2871  
 -14.3051  
 [24704]ENERGY: 16650000      3285.1149      5401.9825      5491.9192  
 340.0045      -14437.3669      -1790.1820      0.0000      0.0000  
 7946.0433      6237.5155      310.7301      -1708.5278      6301.3275  
 310.5959      22.7144      -83.6049      511540.4688      -13.8284  
 -13.8431  
 [24740]ENERGY: 16660000      3326.4459      5307.7213      5485.9539  
 342.6864      -14414.3961      -1713.7705      0.0000      0.0000  
 7904.4887      6239.1295      309.1052      -1665.3591      6301.1522  
 310.4192      -41.0522      -46.5447      511540.4688      -13.7193  
 -13.7145  
 [24790]ENERGY: 16670000      3292.5392      5372.8020      5429.9781  
 333.5543      -14374.4150      -1731.0027      0.0000      0.0000  
 7913.2937      6236.7496      309.4495      -1676.5442      6301.9559  
 310.5264      165.8006      67.7995      511540.4688      -13.5239  
 -13.5273  
 [24826]ENERGY: 16680000      3285.9578      5428.6411      5421.7431  
 313.6121      -14412.0110      -1745.9187      0.0000      0.0000  
 7948.2611      6240.2855      310.8169      -1707.9756      6301.5344  
 310.5155      73.5600      182.8991      511540.4688      -18.8417  
 -18.8565  
 [24876]ENERGY: 16690000      3288.9636      5377.1743      5449.1079  
 324.1565      -14347.5167      -1772.6950      0.0000      0.0000  
 7918.0887      6237.2794      309.6370      -1680.8093      6301.9890  
 310.7335      107.1698      -10.7855      511540.4688      -14.8908  
 -14.8886  
 [24915]ENERGY: 16700000      3211.4811      5491.5913      5479.4290  
 347.4069      -14513.4466      -1717.0257      0.0000      0.0000  
 7937.8400      6237.2761      310.4094      -1700.5639      6300.5672  
 310.5574      127.6341      81.2575      511540.4688      -11.8699  
 -11.8491  
 [24965]ENERGY: 16710000      3288.4694      5426.4127      5471.3576  
 314.7035      -14343.5936      -1829.0244      0.0000      0.0000  
 7910.2976      6238.6228      309.3323      -1671.6748      6302.8469

## Supplementary Text 6

|                         |             |            |             |           |
|-------------------------|-------------|------------|-------------|-----------|
| 310.4803                | -321.4938   | -327.0906  | 511540.4688 | -16.0251  |
| -16.0281                |             |            |             |           |
| [25001]ENERGY: 16720000 | 3265.1773   | 5463.2705  | 5451.3516   |           |
| 336.9787                | -14415.7731 | -1754.5607 | 0.0000      | 0.0000    |
| 7889.1776               | 6235.6218   | 308.5064   | -1653.5558  | 6301.0438 |
| 310.4596                | 17.6248     | 40.6143    | 511540.4688 | -14.5476  |
| -14.5605                |             |            |             |           |
| [25051]ENERGY: 16730000 | 3326.3403   | 5309.2836  | 5457.6565   |           |
| 337.6708                | -14417.1097 | -1695.1623 | 0.0000      | 0.0000    |
| 7918.4134               | 6237.0926   | 309.6497   | -1681.3208  | 6300.5422 |
| 310.3649                | -132.6205   | -133.4430  | 511540.4688 | -9.7197   |
| -9.7061                 |             |            |             |           |
| [25087]ENERGY: 16740000 | 3241.3326   | 5445.3063  | 5439.9072   |           |
| 330.0337                | -14363.4921 | -1765.8591 | 0.0000      | 0.0000    |
| 7909.7941               | 6237.0227   | 309.3126   | -1672.7714  | 6301.3943 |
| 310.5873                | -83.5864    | -78.2371   | 511540.4688 | -11.3958  |
| -11.3997                |             |            |             |           |
| [25137]ENERGY: 16750000 | 3283.7289   | 5333.0202  | 5511.9352   |           |
| 339.6526                | -14445.6038 | -1742.2287 | 0.0000      | 0.0000    |
| 7955.7865               | 6236.2910   | 311.1112   | -1719.4955  | 6302.0416 |
| 310.5935                | 0.3674      | -23.6799   | 511540.4688 | -9.2968   |
| -9.2661                 |             |            |             |           |
| [25173]ENERGY: 16760000 | 3270.6945   | 5410.5085  | 5430.8984   |           |
| 322.7949                | -14396.6711 | -1724.5163 | 0.0000      | 0.0000    |
| 7921.6038               | 6235.3128   | 309.7744   | -1686.2910  | 6300.8300 |
| 310.4910                | 305.4789    | 253.0389   | 511540.4688 | -9.4506   |
| -9.4875                 |             |            |             |           |
| [25223]ENERGY: 16770000 | 3285.8295   | 5336.5359  | 5483.0802   |           |
| 325.4249                | -14370.7009 | -1802.8884 | 0.0000      | 0.0000    |
| 7980.6301               | 6237.9113   | 312.0827   | -1742.7188  | 6301.5984 |
| 310.5033                | -140.4264   | -162.1209  | 511540.4688 | -11.6664  |
| -11.6662                |             |            |             |           |
| [25259]ENERGY: 16780000 | 3319.2357   | 5322.4293  | 5436.1417   |           |
| 334.8410                | -14383.2855 | -1754.5160 | 0.0000      | 0.0000    |
| 7962.0051               | 6236.8514   | 311.3543   | -1725.1537  | 6301.5277 |
| 310.6061                | -73.8817    | -52.1142   | 511540.4688 | -13.4224  |
| -13.4021                |             |            |             |           |
| [25309]ENERGY: 16790000 | 3290.7167   | 5431.5335  | 5484.5465   |           |
| 313.8586                | -14401.3078 | -1807.9567 | 0.0000      | 0.0000    |
| 7926.6254               | 6238.0162   | 309.9708   | -1688.6092  | 6301.7209 |
| 310.6225                | -130.6160   | -217.4617  | 511540.4688 | -10.2692  |
| -10.3019                |             |            |             |           |
| [25348]ENERGY: 16800000 | 3274.7643   | 5393.2409  | 5463.3339   |           |
| 347.9933                | -14435.2490 | -1732.7679 | 0.0000      | 0.0000    |
| 7927.7891               | 6239.1045   | 310.0163   | -1688.6846  | 6302.3125 |
| 310.8188                | -162.0399   | -149.9100  | 511540.4688 | -10.8573  |
| -10.8352                |             |            |             |           |
| [25398]ENERGY: 16810000 | 3296.3128   | 5477.2269  | 5440.3963   |           |
| 338.2099                | -14455.8375 | -1717.5131 | 0.0000      | 0.0000    |
| 7859.8686               | 6238.6639   | 307.3603   | -1621.2047  | 6302.8707 |
| 310.7377                | -59.7339    | -58.1445   | 511540.4688 | -6.9802   |
| -7.0007                 |             |            |             |           |
| [25434]ENERGY: 16820000 | 3252.5587   | 5433.3109  | 5418.4979   |           |
| 333.2685                | -14413.5931 | -1696.0556 | 0.0000      | 0.0000    |

## Supplementary Text 6

|                         |             |            |             |           |
|-------------------------|-------------|------------|-------------|-----------|
| 7910.6308               | 6238.6180   | 309.3453   | -1672.0128  | 6303.1041 |
| 310.8861                | 32.6248     | 18.3863    | 511540.4688 | -13.7118  |
| -13.7004                |             |            |             |           |
| [25484]ENERGY: 16830000 | 3309.3877   | 5364.7338  | 5436.2232   |           |
| 320.1558                | -14341.4681 | -1713.6338 | 0.0000      | 0.0000    |
| 7865.6371               | 6241.0357   | 307.5859   | -1624.6014  | 6302.9987 |
| 310.8057                | -55.7434    | 63.7184    | 511540.4688 | -14.0217  |
| -14.0007                |             |            |             |           |
| [25520]ENERGY: 16840000 | 3362.2473   | 5360.7293  | 5415.6757   |           |
| 333.6943                | -14438.4184 | -1844.8495 | 0.0000      | 0.0000    |
| 8045.1251               | 6234.2038   | 314.6047   | -1810.9213  | 6302.5650 |
| 310.4177                | -269.3591   | -270.0285  | 511540.4688 | -14.3264  |
| -14.3508                |             |            |             |           |
| [25570]ENERGY: 16850000 | 3266.9312   | 5409.2892  | 5435.9628   |           |
| 301.4239                | -14424.1397 | -1720.0201 | 0.0000      | 0.0000    |
| 7965.7853               | 6235.2326   | 311.5022   | -1730.5527  | 6301.1365 |
| 310.4449                | 44.8978     | 146.9230   | 511540.4688 | -12.5580  |
| -12.5790                |             |            |             |           |
| [25606]ENERGY: 16860000 | 3314.8170   | 5377.5457  | 5411.1224   |           |
| 333.9641                | -14298.2656 | -1746.8177 | 0.0000      | 0.0000    |
| 7846.5317               | 6238.8977   | 306.8387   | -1607.6340  | 6302.6172 |
| 310.4055                | 50.1998     | -85.3615   | 511540.4688 | -15.4295  |
| -15.4255                |             |            |             |           |
| [25656]ENERGY: 16870000 | 3287.1302   | 5472.3252  | 5435.0935   |           |
| 343.3988                | -14465.4106 | -1680.2732 | 0.0000      | 0.0000    |
| 7850.2849               | 6242.5489   | 306.9855   | -1607.7360  | 6302.8642 |
| 310.3805                | 72.7795     | -4.3712    | 511540.4688 | -12.5527  |
| -12.5283                |             |            |             |           |
| [25692]ENERGY: 16880000 | 3257.6533   | 5444.9384  | 5438.5846   |           |
| 286.3882                | -14386.6302 | -1736.2522 | 0.0000      | 0.0000    |
| 7935.1253               | 6239.8072   | 310.3032   | -1695.3181  | 6302.9904 |
| 310.5008                | -38.1189    | -61.5735   | 511540.4688 | -13.1676  |
| -13.1658                |             |            |             |           |
| [25742]ENERGY: 16890000 | 3201.0435   | 5389.5701  | 5455.3394   |           |
| 333.7233                | -14411.3053 | -1721.2048 | 0.0000      | 0.0000    |
| 7990.3754               | 6237.5415   | 312.4638   | -1752.8339  | 6301.9213 |
| 310.6743                | 263.5110    | 238.8863   | 511540.4688 | -10.1571  |
| -10.1518                |             |            |             |           |
| [25781]ENERGY: 16900000 | 3198.7583   | 5392.6601  | 5468.9952   |           |
| 322.2762                | -14442.3877 | -1686.5732 | 0.0000      | 0.0000    |
| 7984.0292               | 6237.7581   | 312.2156   | -1746.2711  | 6301.5769 |
| 310.4511                | 288.5207    | 244.6447   | 511540.4688 | -12.6809  |
| -12.6952                |             |            |             |           |
| [25831]ENERGY: 16910000 | 3316.0478   | 5377.4588  | 5464.9697   |           |
| 318.4632                | -14448.4640 | -1699.1522 | 0.0000      | 0.0000    |
| 7910.8771               | 6240.2002   | 309.3550   | -1670.6768  | 6302.7644 |
| 310.4792                | 45.1725     | 20.7627    | 511540.4688 | -16.3989  |
| -16.3929                |             |            |             |           |
| [25867]ENERGY: 16920000 | 3218.6893   | 5459.3292  | 5485.6357   |           |
| 332.0533                | -14452.0891 | -1688.8539 | 0.0000      | 0.0000    |
| 7885.8164               | 6240.5808   | 308.3750   | -1645.2356  | 6303.2046 |
| 310.3892                | 67.7934     | 19.1160    | 511540.4688 | -16.7969  |
| -16.8030                |             |            |             |           |
| [25917]ENERGY: 16930000 | 3244.4536   | 5343.8626  | 5466.0735   |           |

## Supplementary Text 6

|                         |             |            |             |           |
|-------------------------|-------------|------------|-------------|-----------|
| 308.9661                | -14327.8917 | -1734.0521 | 0.0000      | 0.0000    |
| 7937.7571               | 6239.1691   | 310.4061   | -1698.5880  | 6302.4192 |
| 310.4735                | -64.8343    | -114.4169  | 511540.4688 | -12.2937  |
| -12.2887                |             |            |             |           |
| [25953]ENERGY: 16940000 | 3288.8545   | 5261.5608  | 5465.4735   |           |
| 326.3983                | -14343.2448 | -1735.9612 | 0.0000      | 0.0000    |
| 7974.2512               | 6237.3324   | 311.8332   | -1736.9188  | 6301.5953 |
| 310.3853                | -40.0585    | -39.8210   | 511540.4688 | -9.7326   |
| -9.7179                 |             |            |             |           |
| [26003]ENERGY: 16950000 | 3239.6647   | 5337.1342  | 5506.2089   |           |
| 314.6105                | -14424.7523 | -1721.2798 | 0.0000      | 0.0000    |
| 7986.5194               | 6238.1056   | 312.3130   | -1748.4138  | 6301.7171 |
| 310.4456                | 19.2320     | 15.2980    | 511540.4688 | -5.5879   |
| -5.5860                 |             |            |             |           |
| [26039]ENERGY: 16960000 | 3220.5307   | 5357.7755  | 5477.1943   |           |
| 339.1587                | -14375.6728 | -1742.5566 | 0.0000      | 0.0000    |
| 7962.7240               | 6239.1539   | 311.3824   | -1723.5701  | 6303.5001 |
| 310.3827                | 105.7533    | 36.9561    | 511540.4688 | -10.8467  |
| -10.8559                |             |            |             |           |
| [26089]ENERGY: 16970000 | 3238.8686   | 5402.6357  | 5445.3481   |           |
| 333.4719                | -14482.2988 | -1682.9256 | 0.0000      | 0.0000    |
| 7979.5201               | 6234.6199   | 312.0393   | -1744.9001  | 6301.6264 |
| 310.4387                | 89.2308     | 66.3133    | 511540.4688 | -10.0396  |
| -10.0413                |             |            |             |           |
| [26125]ENERGY: 16980000 | 3301.1518   | 5332.2090  | 5437.5378   |           |
| 323.9899                | -14404.6967 | -1698.5538 | 0.0000      | 0.0000    |
| 7948.6112               | 6240.2492   | 310.8306   | -1708.3621  | 6302.0107 |
| 310.4445                | 121.4248    | 51.3894    | 511540.4688 | -7.4428   |
| -7.4539                 |             |            |             |           |
| [26175]ENERGY: 16990000 | 3271.1209   | 5407.6064  | 5481.7220   |           |
| 322.5949                | -14438.4221 | -1698.6954 | 0.0000      | 0.0000    |
| 7893.2726               | 6239.1992   | 308.6665   | -1654.0734  | 6303.2190 |
| 310.3957                | 185.4130    | 87.5445    | 511540.4688 | -11.5080  |
| -11.5036                |             |            |             |           |
| [26214]ENERGY: 17000000 | 3288.7340   | 5373.4413  | 5427.1143   |           |
| 317.2906                | -14437.9819 | -1677.8347 | 0.0000      | 0.0000    |
| 7947.0013               | 6237.7648   | 310.7676   | -1709.2365  | 6302.0276 |
| 310.4427                | -94.4568    | -83.0060   | 511540.4688 | -8.5626   |
| -8.5442                 |             |            |             |           |
| [26264]ENERGY: 17010000 | 3204.2656   | 5281.2234  | 5427.6022   |           |
| 310.1218                | -14319.8394 | -1736.5081 | 0.0000      | 0.0000    |
| 8069.8585               | 6236.7241   | 315.5719   | -1833.1344  | 6301.4926 |
| 310.5140                | 175.7288    | 164.0338   | 511540.4688 | -6.5222   |
| -6.5262                 |             |            |             |           |
| [26300]ENERGY: 17020000 | 3257.9892   | 5376.8637  | 5461.7094   |           |
| 319.3894                | -14422.2801 | -1712.1906 | 0.0000      | 0.0000    |
| 7955.8076               | 6237.2886   | 311.1120   | -1718.5190  | 6302.6714 |
| 310.5107                | 74.4817     | 36.3756    | 511540.4688 | -10.6234  |
| -10.6263                |             |            |             |           |
| [26350]ENERGY: 17030000 | 3352.4341   | 5422.3101  | 5446.3455   |           |
| 329.3428                | -14465.2538 | -1808.3767 | 0.0000      | 0.0000    |
| 7958.5355               | 6235.3375   | 311.2187   | -1723.1979  | 6301.8059 |
| 310.5792                | -217.8080   | -229.2440  | 511540.4688 | -10.0537  |
| -10.0964                |             |            |             |           |

## Supplementary Text 6

|                         |             |            |             |           |
|-------------------------|-------------|------------|-------------|-----------|
| [26386]ENERGY: 17040000 | 3298.4325   | 5266.8903  | 5490.2580   |           |
| 329.1856                | -14322.5308 | -1737.6231 | 0.0000      | 0.0000    |
| 7913.3098               | 6237.9223   | 309.4501   | -1675.3875  | 6301.1615 |
| 310.4297                | -23.0561    | -80.0694   | 511540.4688 | -11.8877  |
| -11.8447                |             |            |             |           |
| [26436]ENERGY: 17050000 | 3180.2836   | 5418.9243  | 5483.1127   |           |
| 306.8388                | -14436.8395 | -1686.9481 | 0.0000      | 0.0000    |
| 7973.5497               | 6238.9216   | 311.8058   | -1734.6281  | 6301.3329 |
| 310.3892                | 41.5147     | 56.4952    | 511540.4688 | -10.8974  |
| -10.8913                |             |            |             |           |
| [26472]ENERGY: 17060000 | 3295.0908   | 5304.9753  | 5476.4705   |           |
| 319.8623                | -14354.8423 | -1712.4895 | 0.0000      | 0.0000    |
| 7908.3788               | 6237.4458   | 309.2573   | -1670.9329  | 6301.1896 |
| 310.4801                | 100.6945    | 6.1871     | 511540.4688 | -9.9069   |
| -9.9197                 |             |            |             |           |
| [26522]ENERGY: 17070000 | 3288.8626   | 5431.9730  | 5438.1130   |           |
| 317.4790                | -14450.5339 | -1758.4587 | 0.0000      | 0.0000    |
| 7972.1038               | 6239.5387   | 311.7492   | -1732.5651  | 6301.6440 |
| 310.4366                | -13.4736    | -141.4579  | 511540.4688 | -11.2686  |
| -11.2553                |             |            |             |           |
| [26558]ENERGY: 17080000 | 3285.9983   | 5337.0206  | 5473.7347   |           |
| 300.6975                | -14398.6896 | -1709.1006 | 0.0000      | 0.0000    |
| 7948.9860               | 6238.6470   | 310.8452   | -1710.3390  | 6300.6186 |
| 310.7236                | 159.7408    | 201.9556   | 511540.4688 | -11.7050  |
| -11.7109                |             |            |             |           |
| [26608]ENERGY: 17090000 | 3244.6234   | 5479.8611  | 5460.6762   |           |
| 333.6443                | -14461.0237 | -1701.3637 | 0.0000      | 0.0000    |
| 7882.3741               | 6238.7918   | 308.2404   | -1643.5823  | 6301.3829 |
| 310.4539                | 103.7106    | 108.5297   | 511540.4688 | -10.8289  |
| -10.8413                |             |            |             |           |
| [26647]ENERGY: 17100000 | 3264.0039   | 5379.2392  | 5491.1860   |           |
| 332.7930                | -14389.3960 | -1775.6104 | 0.0000      | 0.0000    |
| 7931.8018               | 6234.0174   | 310.1732   | -1697.7844  | 6301.2257 |
| 310.4471                | 8.3252      | -35.1015   | 511540.4688 | -12.8358  |
| -12.8188                |             |            |             |           |
| [26697]ENERGY: 17110000 | 3224.0836   | 5343.1867  | 5469.0866   |           |
| 340.7729                | -14363.7686 | -1721.8452 | 0.0000      | 0.0000    |
| 7945.9617               | 6237.4778   | 310.7270   | -1708.4839  | 6301.1936 |
| 310.5480                | 119.0481    | 130.1151   | 511540.4688 | -9.4795   |
| -9.5139                 |             |            |             |           |
| [26733]ENERGY: 17120000 | 3185.0652   | 5369.6853  | 5467.9915   |           |
| 316.3293                | -14390.5185 | -1714.1708 | 0.0000      | 0.0000    |
| 8001.6458               | 6236.0278   | 312.9045   | -1765.6180  | 6300.8656 |
| 310.4257                | -103.2194   | -117.6752  | 511540.4688 | -12.9198  |
| -12.9108                |             |            |             |           |
| [26783]ENERGY: 17130000 | 3230.5805   | 5389.9253  | 5434.4145   |           |
| 349.0170                | -14349.2834 | -1697.2736 | 0.0000      | 0.0000    |
| 7879.3939               | 6236.7742   | 308.1238   | -1642.6197  | 6300.4765 |
| 310.3672                | 33.3362     | -72.9660   | 511540.4688 | -7.6543   |
| -7.6317                 |             |            |             |           |
| [26819]ENERGY: 17140000 | 3237.5331   | 5326.0988  | 5463.8429   |           |
| 342.1573                | -14394.9695 | -1733.6846 | 0.0000      | 0.0000    |
| 7994.5424               | 6235.5204   | 312.6267   | -1759.0220  | 6300.8495 |
| 310.3230                | 220.3730    | 48.5208    | 511540.4688 | -9.3406   |

Supplementary Text 6

-9.3580  
 [26869]ENERGY: 17150000      3338.2043      5342.2230      5386.3179  
 323.4700      -14372.5149      -1779.6457      0.0000      0.0000  
 7994.0950      6232.1495      312.6092      -1761.9455      6299.2231  
 310.4263      75.8779      -12.1682      511540.4688      -10.4718  
 -10.4608  
 [26905]ENERGY: 17160000      3296.5412      5293.7840      5486.0083  
 319.8065      -14337.6249      -1693.9295      0.0000      0.0000  
 7875.1063      6239.6920      307.9562      -1635.4143      6299.4257  
 310.5625      134.6670      24.9002      511540.4688      -10.6543  
 -10.6713  
 [26955]ENERGY: 17170000      3282.6519      5303.7775      5454.7648  
 329.6333      -14367.3288      -1712.9781      0.0000      0.0000  
 7945.2163      6235.7368      310.6978      -1709.4795      6301.0256  
 310.3185      -96.2281      -39.7950      511540.4688      -11.4402  
 -11.4297  
 [26991]ENERGY: 17180000      3317.5729      5342.8548      5446.0039  
 342.2818      -14349.6056      -1766.2065      0.0000      0.0000  
 7904.3115      6237.2128      309.0982      -1667.0987      6300.2359  
 310.4691      -300.8976      -267.5973      511540.4688      -10.1025  
 -10.1072  
 [27041]ENERGY: 17190000      3274.2504      5410.5301      5450.2761  
 315.5901      -14348.8304      -1783.1248      0.0000      0.0000  
 7919.8275      6238.5190      309.7050      -1681.3085      6301.8610  
 310.3777      -69.3431      -159.2384      511540.4688      -7.4884  
 -7.4611  
 [27080]ENERGY: 17200000      3278.1590      5435.6373      5488.7804  
 328.9866      -14421.9652      -1766.5324      0.0000      0.0000  
 7892.4789      6235.5447      308.6355      -1656.9343      6300.7127  
 310.4006      -5.7985      85.3973      511540.4688      -10.4828  
 -10.5025  
 [27130]ENERGY: 17210000      3215.8583      5425.2528      5431.4778  
 319.9564      -14354.6508      -1745.5523      0.0000      0.0000  
 7944.1671      6236.5094      310.6568      -1707.6578      6301.7186  
 310.5815      121.8166      26.2590      511540.4688      -10.4453  
 -10.4592  
 [27166]ENERGY: 17220000      3339.0482      5415.9890      5415.6636  
 321.1687      -14432.5040      -1702.8415      0.0000      0.0000  
 7882.5483      6239.0722      308.2472      -1643.4761      6301.1760  
 310.4199      43.0967      -3.0240      511540.4688      -9.7946  
 -9.7847  
 [27216]ENERGY: 17230000      3300.1288      5350.1663      5500.7845  
 348.8034      -14461.6099      -1716.7673      0.0000      0.0000  
 7918.9542      6240.4599      309.6708      -1678.4943      6300.0233  
 310.4978      58.9951      -10.7863      511540.4688      -11.5033  
 -11.5176  
 [27252]ENERGY: 17240000      3273.5723      5293.2883      5512.1139  
 331.9499      -14393.8871      -1718.6839      0.0000      0.0000  
 7936.8846      6235.2379      310.3720      -1701.6466      6301.0529  
 310.4276      -41.8764      -127.2451      511540.4688      -6.1363  
 -6.1275  
 [27302]ENERGY: 17250000      3243.2172      5325.0274      5423.7172  
 318.8255      -14370.0099      -1691.3168      0.0000      0.0000  
 7988.0634      6237.5239      312.3733      -1750.5395      6301.4711



## Supplementary Text 6

|                         |             |            |             |           |
|-------------------------|-------------|------------|-------------|-----------|
| 310.4677                | 167.6669    | 101.4408   | 511540.4688 | -8.4963   |
| -8.4859                 |             |            |             |           |
| [27338]ENERGY: 17260000 | 3258.1703   | 5284.2126  | 5457.0858   |           |
| 320.5339                | -14362.8926 | -1729.6271 | 0.0000      | 0.0000    |
| 8007.1546               | 6234.6374   | 313.1199   | -1772.5172  | 6300.7347 |
| 310.1503                | -12.5408    | -57.8735   | 511540.4688 | -2.5930   |
| -2.5964                 |             |            |             |           |
| [27388]ENERGY: 17270000 | 3311.3444   | 5230.4137  | 5492.8185   |           |
| 360.3649                | -14376.8442 | -1705.7529 | 0.0000      | 0.0000    |
| 7920.6775               | 6233.0218   | 309.7382   | -1687.6556  | 6301.6054 |
| 310.2620                | -5.7570     | -33.2007   | 511540.4688 | -7.0990   |
| -7.0793                 |             |            |             |           |
| [27424]ENERGY: 17280000 | 3247.4702   | 5408.9621  | 5444.1369   |           |
| 325.5614                | -14383.0347 | -1778.5309 | 0.0000      | 0.0000    |
| 7971.5709               | 6236.1360   | 311.7284   | -1735.4349  | 6300.8527 |
| 310.2090                | -234.2527   | -92.5168   | 511540.4688 | -8.7295   |
| -8.7408                 |             |            |             |           |
| [27474]ENERGY: 17290000 | 3176.7823   | 5384.5801  | 5486.2808   |           |
| 335.5242                | -14379.1158 | -1712.6654 | 0.0000      | 0.0000    |
| 7946.2431               | 6237.6293   | 310.7380   | -1708.6138  | 6300.0203 |
| 310.2505                | 14.0184     | -122.5981  | 511540.4688 | -3.8075   |
| -3.8046                 |             |            |             |           |
| [27513]ENERGY: 17300000 | 3235.0367   | 5435.5696  | 5472.6277   |           |
| 335.5056                | -14356.8005 | -1743.0861 | 0.0000      | 0.0000    |
| 7857.8148               | 6236.6677   | 307.2800   | -1621.1471  | 6300.5743 |
| 310.2150                | 85.3652     | 0.3397     | 511540.4688 | -9.3354   |
| -9.3662                 |             |            |             |           |
| [27563]ENERGY: 17310000 | 3240.3135   | 5361.2660  | 5478.7765   |           |
| 315.2919                | -14359.6838 | -1797.6026 | 0.0000      | 0.0000    |
| 7996.8795               | 6235.2409   | 312.7181   | -1761.6386  | 6300.7950 |
| 310.2899                | -40.3556    | 33.6345    | 511540.4688 | -8.8316   |
| -8.8103                 |             |            |             |           |
| [27599]ENERGY: 17320000 | 3265.2978   | 5383.2949  | 5445.4770   |           |
| 335.5600                | -14422.7732 | -1685.9049 | 0.0000      | 0.0000    |
| 7918.8743               | 6239.8258   | 309.6677   | -1679.0485  | 6302.1440 |
| 310.5551                | 246.9575    | 194.6944   | 511540.4688 | -1.9411   |
| -1.9503                 |             |            |             |           |
| [27649]ENERGY: 17330000 | 3181.1966   | 5423.3237  | 5430.6734   |           |
| 334.3497                | -14363.5036 | -1735.4675 | 0.0000      | 0.0000    |
| 7966.6122               | 6237.1846   | 311.5345   | -1729.4276  | 6302.6555 |
| 310.4790                | -2.7493     | 82.1238    | 511540.4688 | -4.6363   |
| -4.5950                 |             |            |             |           |
| [27685]ENERGY: 17340000 | 3262.4012   | 5463.6322  | 5451.4216   |           |
| 326.8239                | -14384.6313 | -1770.7381 | 0.0000      | 0.0000    |
| 7893.7868               | 6242.6963   | 308.6867   | -1651.0905  | 6304.0421 |
| 310.4590                | 105.5493    | -92.9463   | 511540.4688 | -6.7963   |
| -6.8624                 |             |            |             |           |
| [27735]ENERGY: 17350000 | 3259.8421   | 5259.5005  | 5499.2836   |           |
| 322.0326                | -14374.0667 | -1740.4112 | 0.0000      | 0.0000    |
| 8012.6023               | 6238.7833   | 313.3329   | -1773.8191  | 6301.9201 |
| 310.5138                | 272.6125    | 175.1538   | 511540.4688 | -2.7710   |
| -2.7393                 |             |            |             |           |
| [27771]ENERGY: 17360000 | 3281.3616   | 5345.4594  | 5499.7755   |           |
| 336.5330                | -14493.1767 | -1713.1124 | 0.0000      | 0.0000    |

## Supplementary Text 6

|                         |             |            |             |           |
|-------------------------|-------------|------------|-------------|-----------|
| 7977.8244               | 6234.6648   | 311.9729   | -1743.1596  | 6302.9811 |
| 310.5285                | 137.9663    | 66.2612    | 511540.4688 | -7.0741   |
| -7.0743                 |             |            |             |           |
| [27821]ENERGY: 17370000 | 3297.3049   | 5266.1979  | 5501.8483   |           |
| 314.8481                | -14429.2581 | -1733.1708 | 0.0000      | 0.0000    |
| 8021.1941               | 6238.9645   | 313.6689   | -1782.2296  | 6303.9877 |
| 310.4579                | -53.0293    | -32.2177   | 511540.4688 | -10.7626  |
| -10.7628                |             |            |             |           |
| [27857]ENERGY: 17380000 | 3277.3756   | 5341.4577  | 5473.6379   |           |
| 326.5594                | -14348.9416 | -1784.4768 | 0.0000      | 0.0000    |
| 7953.4064               | 6239.0186   | 311.0181   | -1714.3878  | 6303.7591 |
| 310.4077                | -209.3542   | -137.8337  | 511540.4688 | -6.5160   |
| -6.4897                 |             |            |             |           |
| [27907]ENERGY: 17390000 | 3266.3653   | 5371.9430  | 5445.3714   |           |
| 336.5151                | -14421.2496 | -1705.6020 | 0.0000      | 0.0000    |
| 7946.0498               | 6239.3929   | 310.7304   | -1706.6569  | 6302.8721 |
| 310.4761                | 79.7812     | 51.8523    | 511540.4688 | -6.2625   |
| -6.2607                 |             |            |             |           |
| [27946]ENERGY: 17400000 | 3384.2412   | 5351.6510  | 5446.8178   |           |
| 330.7234                | -14410.0075 | -1740.3118 | 0.0000      | 0.0000    |
| 7873.1011               | 6236.2152   | 307.8777   | -1636.8859  | 6302.4540 |
| 310.4254                | -3.3063     | -45.5278   | 511540.4688 | -3.6603   |
| -3.6993                 |             |            |             |           |
| [27996]ENERGY: 17410000 | 3259.0484   | 5374.8613  | 5463.7863   |           |
| 313.4040                | -14436.1771 | -1725.9835 | 0.0000      | 0.0000    |
| 7988.6434               | 6237.5828   | 312.3960   | -1751.0606  | 6303.6738 |
| 310.4365                | -50.4188    | -31.5645   | 511540.4688 | -6.1274   |
| -6.1192                 |             |            |             |           |
| [28032]ENERGY: 17420000 | 3355.9935   | 5321.1221  | 5489.9738   |           |
| 325.1295                | -14431.6998 | -1769.1304 | 0.0000      | 0.0000    |
| 7952.0488               | 6243.4376   | 310.9650   | -1708.6112  | 6304.2934 |
| 310.4073                | -120.7079   | -21.4461   | 511540.4688 | -6.4156   |
| -6.3923                 |             |            |             |           |
| [28082]ENERGY: 17430000 | 3251.7065   | 5265.3001  | 5468.7694   |           |
| 359.0941                | -14380.7477 | -1696.0602 | 0.0000      | 0.0000    |
| 7971.3192               | 6239.3814   | 311.7186   | -1731.9378  | 6303.1248 |
| 310.4618                | 202.4102    | 180.9605   | 511540.4688 | -5.1472   |
| -5.1467                 |             |            |             |           |
| [28118]ENERGY: 17440000 | 3305.4707   | 5351.2128  | 5510.5200   |           |
| 304.7434                | -14395.3728 | -1708.7372 | 0.0000      | 0.0000    |
| 7878.1268               | 6245.9636   | 308.0743   | -1632.1631  | 6305.3943 |
| 310.4649                | 171.9607    | 82.8846    | 511540.4688 | -6.0469   |
| -6.0774                 |             |            |             |           |
| [28168]ENERGY: 17450000 | 3282.3391   | 5500.2756  | 5426.3871   |           |
| 330.3893                | -14479.2864 | -1728.3117 | 0.0000      | 0.0000    |
| 7908.5948               | 6240.3879   | 309.2657   | -1668.2069  | 6305.4497 |
| 310.4647                | 19.5064     | 46.9214    | 511540.4688 | -6.6166   |
| -6.6122                 |             |            |             |           |
| [28204]ENERGY: 17460000 | 3220.5441   | 5376.2809  | 5453.0147   |           |
| 323.6677                | -14366.6248 | -1662.1263 | 0.0000      | 0.0000    |
| 7894.8972               | 6239.6535   | 308.7301   | -1655.2437  | 6304.5217 |
| 310.3706                | 34.9072     | 129.8070   | 511540.4688 | -3.9776   |
| -3.9591                 |             |            |             |           |
| [28254]ENERGY: 17470000 | 3195.4576   | 5343.5118  | 5476.3486   |           |

## Supplementary Text 6

|                         |             |            |             |           |
|-------------------------|-------------|------------|-------------|-----------|
| 335.5189                | -14399.4051 | -1636.0592 | 0.0000      | 0.0000    |
| 7927.4835               | 6242.8561   | 310.0044   | -1684.6274  | 6306.2962 |
| 310.6554                | 170.1925    | 117.2427   | 511540.4688 | -6.4111   |
| -6.4260                 |             |            |             |           |
| [28290]ENERGY: 17480000 | 3313.2618   | 5384.1215  | 5460.5354   |           |
| 328.6562                | -14437.1822 | -1735.1938 | 0.0000      | 0.0000    |
| 7929.3202               | 6243.5190   | 310.0762   | -1685.8012  | 6306.6528 |
| 310.5374                | 91.4980     | 8.0601     | 511540.4688 | -9.7490   |
| -9.7326                 |             |            |             |           |
| [28340]ENERGY: 17490000 | 3217.7447   | 5324.4729  | 5499.4093   |           |
| 330.7929                | -14485.3753 | -1657.4295 | 0.0000      | 0.0000    |
| 8010.0914               | 6239.7063   | 313.2347   | -1770.3850  | 6307.1349 |
| 310.6802                | 150.4069    | 88.1488    | 511540.4688 | -2.8038   |
| -2.8152                 |             |            |             |           |
| [28379]ENERGY: 17500000 | 3343.2164   | 5389.8903  | 5477.9356   |           |
| 324.6240                | -14350.3639 | -1837.2185 | 0.0000      | 0.0000    |
| 7897.2719               | 6245.3558   | 308.8229   | -1651.9160  | 6308.3849 |
| 310.6132                | -70.0394    | -66.1144   | 511540.4688 | -7.7557   |
| -7.7544                 |             |            |             |           |
| [28429]ENERGY: 17510000 | 3286.5170   | 5438.8946  | 5378.7870   |           |
| 309.4462                | -14324.1490 | -1776.1306 | 0.0000      | 0.0000    |
| 7929.9240               | 6243.2892   | 310.0998   | -1686.6348  | 6308.4071 |
| 310.6392                | -66.1399    | -122.3541  | 511540.4688 | -2.1194   |
| -2.1151                 |             |            |             |           |
| [28465]ENERGY: 17520000 | 3263.3188   | 5437.5144  | 5458.1033   |           |
| 325.3581                | -14432.7483 | -1659.7599 | 0.0000      | 0.0000    |
| 7852.2476               | 6244.0340   | 307.0623   | -1608.2136  | 6305.3159 |
| 310.7495                | -19.8581    | 22.5873    | 511540.4688 | -4.3510   |
| -4.3470                 |             |            |             |           |
| [28515]ENERGY: 17530000 | 3247.5647   | 5368.0216  | 5458.8363   |           |
| 318.5455                | -14381.5207 | -1739.6721 | 0.0000      | 0.0000    |
| 7970.3933               | 6242.1686   | 311.6824   | -1728.2247  | 6306.1673 |
| 310.8424                | -92.0118    | -50.2210   | 511540.4688 | -6.4308   |
| -6.4378                 |             |            |             |           |
| [28551]ENERGY: 17540000 | 3325.3270   | 5332.3904  | 5472.2772   |           |
| 331.4233                | -14373.7262 | -1782.8059 | 0.0000      | 0.0000    |
| 7936.3688               | 6241.2547   | 310.3518   | -1695.1142  | 6307.0757 |
| 310.5992                | -197.2693   | -188.9700  | 511540.4688 | -4.1936   |
| -4.2154                 |             |            |             |           |
| [28601]ENERGY: 17550000 | 3338.3490   | 5374.5998  | 5507.8610   |           |
| 335.4658                | -14380.8105 | -1809.5143 | 0.0000      | 0.0000    |
| 7881.7073               | 6247.6582   | 308.2143   | -1634.0491  | 6307.9271 |
| 310.8120                | -166.6271   | -39.6030   | 511540.4688 | -8.0229   |
| -7.9989                 |             |            |             |           |
| [28637]ENERGY: 17560000 | 3206.0436   | 5379.0302  | 5480.7016   |           |
| 328.2833                | -14423.2298 | -1706.3188 | 0.0000      | 0.0000    |
| 7977.1503               | 6241.6605   | 311.9466   | -1735.4898  | 6307.3599 |
| 310.7228                | 161.8871    | -28.2571   | 511540.4688 | -0.9962   |
| -1.0288                 |             |            |             |           |
| [28687]ENERGY: 17570000 | 3259.8015   | 5430.4677  | 5413.7190   |           |
| 294.6411                | -14379.3682 | -1756.8438 | 0.0000      | 0.0000    |
| 7983.1900               | 6245.6074   | 312.1828   | -1737.5826  | 6309.3081 |
| 310.7338                | 4.6263      | -90.1318   | 511540.4688 | -3.6208   |
| -3.6107                 |             |            |             |           |

## Supplementary Text 6

|                         |             |            |             |
|-------------------------|-------------|------------|-------------|
| [28723]ENERGY: 17580000 | 3239.0492   | 5403.5173  | 5434.4889   |
| 341.8754                | -14388.4603 | -1771.4954 | 0.0000      |
| 7982.9372               | 6241.9122   | 312.1729   | -1741.0250  |
| 310.6428                | -112.8563   | -139.3795  | 511540.4688 |
| -5.3905                 |             |            | -5.4050     |
| [28773]ENERGY: 17590000 | 3238.8232   | 5414.0373  | 5472.7469   |
| 328.5773                | -14369.4833 | -1724.9399 | 0.0000      |
| 7882.5876               | 6242.3491   | 308.2487   | -1640.2385  |
| 310.4778                | 69.7871     | 90.7356    | 511540.4688 |
| -4.5070                 |             |            | -4.5056     |
| [28812]ENERGY: 17600000 | 3300.5926   | 5345.4588  | 5435.9102   |
| 336.2407                | -14415.9057 | -1754.0948 | 0.0000      |
| 7995.6962               | 6243.8981   | 312.6718   | -1751.7981  |
| 310.6592                | 45.2167     | -43.5464   | 511540.4688 |
| 2.7949                  |             |            | 2.8025      |
| [28862]ENERGY: 17610000 | 3237.8805   | 5346.0676  | 5493.0947   |
| 337.5098                | -14376.9294 | -1715.8212 | 0.0000      |
| 7921.0765               | 6242.8785   | 309.7538   | -1678.1980  |
| 310.8716                | 122.5489    | 41.7077    | 511540.4688 |
| -10.1833                |             |            | -10.1802    |
| [28898]ENERGY: 17620000 | 3254.8818   | 5378.8748  | 5478.7379   |
| 302.9955                | -14372.8579 | -1680.8844 | 0.0000      |
| 7881.3681               | 6243.1159   | 308.2010   | -1638.2522  |
| 310.6261                | 60.8097     | -66.2180   | 511540.4688 |
| -6.0113                 |             |            | -6.0108     |
| [28948]ENERGY: 17630000 | 3299.7135   | 5443.8042  | 5492.7856   |
| 338.6658                | -14478.7350 | -1725.0870 | 0.0000      |
| 7877.4178               | 6248.5650   | 308.0465   | -1628.8528  |
| 310.6390                | -63.1710    | 4.2946     | 511540.4688 |
| -6.7806                 |             |            | -6.7946     |
| [28984]ENERGY: 17640000 | 3246.5164   | 5357.2464  | 5424.6146   |
| 326.0940                | -14281.1826 | -1747.3368 | 0.0000      |
| 7916.7710               | 6242.7230   | 309.5855   | -1674.0480  |
| 310.6767                | -62.1785    | -14.0874   | 511540.4688 |
| -7.0970                 |             |            | -7.1128     |
| [29034]ENERGY: 17650000 | 3247.7216   | 5331.0500  | 5441.0620   |
| 337.0254                | -14302.2526 | -1735.0340 | 0.0000      |
| 7925.9413               | 6245.5137   | 309.9441   | -1680.4276  |
| 310.8865                | 72.0538     | 18.1306    | 511540.4688 |
| -5.1986                 |             |            | -5.2045     |
| [29070]ENERGY: 17660000 | 3246.1951   | 5348.6110  | 5453.1366   |
| 323.1318                | -14249.0768 | -1768.4897 | 0.0000      |
| 7891.9594               | 6245.4674   | 308.6152   | -1646.4920  |
| 310.5493                | 90.8258     | 86.1621    | 511540.4688 |
| -9.7309                 |             |            | -9.7079     |
| [29120]ENERGY: 17670000 | 3234.1894   | 5254.6080  | 5493.7758   |
| 319.6994                | -14341.2578 | -1726.7916 | 0.0000      |
| 8008.4089               | 6242.6321   | 313.1690   | -1765.7768  |
| 310.6243                | 188.3238    | 198.4238   | 511540.4688 |
| -10.3395                |             |            | -10.3354    |
| [29156]ENERGY: 17680000 | 3246.1073   | 5338.5362  | 5457.3934   |
| 311.7495                | -14340.9846 | -1709.1269 | 0.0000      |
| 7939.4540               | 6243.1290   | 310.4725   | -1696.3250  |
| 310.6761                | 52.5248     | 45.4195    | 511540.4688 |
|                         |             |            | -11.3076    |

Supplementary Text 6

-11.2942  
 [29206]ENERGY: 17690000      3279.7342      5377.6428      5425.2527  
 329.0051      -14443.7692      -1719.8376      0.0000      0.0000  
 7996.3266      6244.3546      312.6965      -1751.9720      6307.6695  
 310.8384      201.5016      90.2702      511540.4688      -8.7105  
 -8.7287  
 [29245]ENERGY: 17700000      3296.3942      5420.8969      5437.1647  
 324.2139      -14368.5947      -1843.8196      0.0000      0.0000  
 7976.7828      6243.0382      311.9322      -1733.7446      6307.2394  
 310.8335      -185.4794      -152.9722      511540.4688      -9.7775  
 -9.7699  
 [29295]ENERGY: 17710000      3276.3384      5414.2527      5420.0701  
 336.2511      -14422.2680      -1726.3129      0.0000      0.0000  
 7945.9416      6244.2730      310.7262      -1701.6686      6306.5006  
 310.7202      61.9923      54.2417      511540.4688      -14.1802  
 -14.1593  
 [29331]ENERGY: 17720000      3288.6761      5343.6005      5451.1234  
 343.7254      -14465.2537      -1671.7498      0.0000      0.0000  
 7954.5655      6244.6874      311.0634      -1709.8780      6308.0216  
 310.6193      162.6125      98.1463      511540.4688      -6.2902  
 -6.3182  
 [29381]ENERGY: 17730000      3274.8244      5328.7396      5476.1336  
 327.2065      -14383.6009      -1818.8688      0.0000      0.0000  
 8040.4561      6244.8905      314.4222      -1795.5656      6308.2294  
 310.6178      -123.1154      -46.3730      511540.4688      -13.2418  
 -13.2235  
 [29417]ENERGY: 17740000      3266.1789      5435.5650      5416.2199  
 318.8717      -14396.6748      -1746.3433      0.0000      0.0000  
 7951.8443      6245.6617      310.9570      -1706.1826      6308.9915  
 310.5510      -35.3545      5.0337      511540.4688      -10.9065  
 -10.9279  
 [29467]ENERGY: 17750000      3264.7231      5502.1730      5459.9355  
 322.7505      -14440.6458      -1780.2546      0.0000      0.0000  
 7911.9823      6240.6639      309.3982      -1671.3184      6307.9011  
 310.8657      204.2209      218.0472      511540.4688      -8.1707  
 -8.1534  
 [29503]ENERGY: 17760000      3350.8143      5311.0858      5429.0432  
 343.2368      -14358.9498      -1817.7951      0.0000      0.0000  
 7983.8965      6241.3317      312.2104      -1742.5648      6308.2000  
 310.6061      -34.0510      -186.0687      511540.4688      -11.5052  
 -11.5272  
 [29553]ENERGY: 17770000      3254.4491      5342.3802      5506.4652  
 324.0801      -14443.5162      -1713.2973      0.0000      0.0000  
 7973.7846      6244.3457      311.8150      -1729.4389      6307.3380  
 310.7968      81.1793      47.5368      511540.4688      -9.4631  
 -9.4358  
 [29589]ENERGY: 17780000      3285.2199      5519.2304      5465.8086  
 323.5792      -14519.5465      -1730.6451      0.0000      0.0000  
 7899.6876      6243.3341      308.9174      -1656.3535      6307.1828  
 310.8703      83.2179      58.0990      511540.4688      -10.0836  
 -10.1016  
 [29639]ENERGY: 17790000      3295.1468      5387.3043      5456.8564  
 321.3651      -14422.4290      -1700.8233      0.0000      0.0000  
 7905.8547      6243.2749      309.1586      -1662.5797      6307.3711

## Supplementary Text 6

|                         |             |            |             |           |
|-------------------------|-------------|------------|-------------|-----------|
| 310.9056                | 36.9252     | 3.4193     | 511540.4688 | -9.5500   |
| -9.5390                 |             |            |             |           |
| [29678]ENERGY: 17800000 | 3253.0290   | 5322.7453  | 5479.3316   |           |
| 327.9417                | -14369.4273 | -1756.1474 | 0.0000      | 0.0000    |
| 7990.1179               | 6247.5908   | 312.4537   | -1742.5271  | 6309.9108 |
| 310.9757                | 69.2065     | 32.2010    | 511540.4688 | -5.5292   |
| -5.5514                 |             |            |             |           |
| [29728]ENERGY: 17810000 | 3316.1874   | 5309.3515  | 5477.6935   |           |
| 322.5083                | -14409.3734 | -1655.6009 | 0.0000      | 0.0000    |
| 7887.4631               | 6248.2294   | 308.4394   | -1639.2337  | 6309.2176 |
| 311.0317                | 47.0421     | 9.8780     | 511540.4688 | -9.2963   |
| -9.2786                 |             |            |             |           |
| [29764]ENERGY: 17820000 | 3303.1653   | 5414.1805  | 5464.7007   |           |
| 334.6155                | -14417.0672 | -1770.9411 | 0.0000      | 0.0000    |
| 7919.0145               | 6247.6682   | 309.6732   | -1671.3462  | 6308.2146 |
| 310.9933                | -169.1235   | -117.5812  | 511540.4688 | -5.8870   |
| -5.8651                 |             |            |             |           |
| [29814]ENERGY: 17830000 | 3270.4303   | 5444.6427  | 5480.9814   |           |
| 328.1703                | -14474.2285 | -1827.7248 | 0.0000      | 0.0000    |
| 8018.6598               | 6240.9312   | 313.5698   | -1777.7287  | 6307.5952 |
| 310.8975                | -114.3095   | -17.8803   | 511540.4688 | -8.0403   |
| -8.0304                 |             |            |             |           |
| [29850]ENERGY: 17840000 | 3301.7494   | 5483.3176  | 5431.3358   |           |
| 337.1259                | -14324.7136 | -1849.6843 | 0.0000      | 0.0000    |
| 7866.9860               | 6246.1168   | 307.6386   | -1620.8693  | 6309.1792 |
| 310.8121                | -177.7034   | -196.1756  | 511540.4688 | -5.6346   |
| -5.6671                 |             |            |             |           |
| [29900]ENERGY: 17850000 | 3247.8985   | 5297.0849  | 5477.5944   |           |
| 351.9873                | -14354.5409 | -1769.0912 | 0.0000      | 0.0000    |
| 7991.2335               | 6242.1664   | 312.4973   | -1749.0671  | 6309.5349 |
| 310.8239                | 41.5854     | 30.5501    | 511540.4688 | -3.9084   |
| -3.9223                 |             |            |             |           |
| [29936]ENERGY: 17860000 | 3331.3977   | 5344.3489  | 5515.0242   |           |
| 356.2766                | -14432.5579 | -1736.2573 | 0.0000      | 0.0000    |
| 7870.0731               | 6248.3052   | 307.7593   | -1621.7679  | 6309.6050 |
| 310.6891                | -165.2362   | -67.6178   | 511540.4688 | -8.5002   |
| -8.4905                 |             |            |             |           |
| [29986]ENERGY: 17870000 | 3193.7196   | 5384.4276  | 5507.4024   |           |
| 340.0659                | -14442.3419 | -1747.7696 | 0.0000      | 0.0000    |
| 8008.5028               | 6244.0069   | 313.1726   | -1764.4959  | 6309.7180 |
| 310.8339                | 167.4750    | 83.6670    | 511540.4688 | -3.6930   |
| -3.6718                 |             |            |             |           |
| [30022]ENERGY: 17880000 | 3218.4927   | 5320.2251  | 5516.4058   |           |
| 333.2996                | -14418.1734 | -1751.4680 | 0.0000      | 0.0000    |
| 8022.9124               | 6241.6942   | 313.7361   | -1781.2182  | 6309.4148 |
| 310.7998                | 341.8186    | 205.8206   | 511540.4688 | -10.2475  |
| -10.2544                |             |            |             |           |
| [30072]ENERGY: 17890000 | 3309.8527   | 5457.7443  | 5489.3097   |           |
| 348.0294                | -14421.6448 | -1832.2145 | 0.0000      | 0.0000    |
| 7897.7345               | 6248.8112   | 308.8410   | -1648.9233  | 6310.5438 |
| 310.9627                | -132.0716   | -82.7171   | 511540.4688 | -4.4126   |
| -4.4224                 |             |            |             |           |
| [30111]ENERGY: 17900000 | 3229.4883   | 5306.3200  | 5502.1805   |           |
| 340.3892                | -14379.6507 | -1752.2494 | 0.0000      | 0.0000    |

## Supplementary Text 6

|                         |             |            |             |           |
|-------------------------|-------------|------------|-------------|-----------|
| 7998.1796               | 6244.6575   | 312.7689   | -1753.5221  | 6310.4635 |
| 310.9340                | 2.2786      | -0.5472    | 511540.4688 | -0.1646   |
| -0.1540                 |             |            |             |           |
| [30161]ENERGY: 17910000 | 3244.6478   | 5451.3705  | 5494.8838   |           |
| 333.1268                | -14439.9431 | -1778.3189 | 0.0000      | 0.0000    |
| 7942.2275               | 6247.9944   | 310.5809   | -1694.2331  | 6310.6447 |
| 311.0296                | 15.6088     | -164.6960  | 511540.4688 | -5.3901   |
| -5.4035                 |             |            |             |           |
| [30197]ENERGY: 17920000 | 3274.5485   | 5453.3966  | 5460.4287   |           |
| 324.5337                | -14393.7393 | -1780.2976 | 0.0000      | 0.0000    |
| 7909.7566               | 6248.6272   | 309.3112   | -1661.1294  | 6310.1570 |
| 311.0070                | -2.9185     | 32.8287    | 511540.4688 | -6.5598   |
| -6.5476                 |             |            |             |           |
| [30247]ENERGY: 17930000 | 3296.3141   | 5414.1273  | 5463.1745   |           |
| 327.7741                | -14390.8411 | -1750.1653 | 0.0000      | 0.0000    |
| 7883.6403               | 6244.0239   | 308.2899   | -1639.6163  | 6310.6764 |
| 310.9918                | -11.2510    | -123.1319  | 511540.4688 | -8.3415   |
| -8.3559                 |             |            |             |           |
| [30283]ENERGY: 17940000 | 3255.7543   | 5452.8727  | 5411.0942   |           |
| 328.9706                | -14407.8733 | -1781.8802 | 0.0000      | 0.0000    |
| 7988.0359               | 6246.9742   | 312.3723   | -1741.0617  | 6311.0604 |
| 311.0828                | 68.7596     | 134.5346   | 511540.4688 | -9.6653   |
| -9.6486                 |             |            |             |           |
| [30333]ENERGY: 17950000 | 3317.5292   | 5357.4251  | 5454.6047   |           |
| 321.9476                | -14426.3965 | -1749.5783 | 0.0000      | 0.0000    |
| 7974.3792               | 6249.9110   | 311.8382   | -1724.4682  | 6311.1347 |
| 311.1049                | -224.9336   | -141.1068  | 511540.4688 | -3.6870   |
| -3.7088                 |             |            |             |           |
| [30369]ENERGY: 17960000 | 3263.0188   | 5404.9037  | 5463.0511   |           |
| 315.0044                | -14377.6602 | -1743.2086 | 0.0000      | 0.0000    |
| 7923.9839               | 6249.0930   | 309.8675   | -1674.8909  | 6311.7576 |
| 311.1321                | 228.6018    | 198.2453   | 511540.4688 | -8.2294   |
| -8.2295                 |             |            |             |           |
| [30419]ENERGY: 17970000 | 3341.7076   | 5352.9680  | 5511.1899   |           |
| 328.5897                | -14435.5387 | -1764.7788 | 0.0000      | 0.0000    |
| 7914.6999               | 6248.8376   | 309.5045   | -1665.8622  | 6310.5257 |
| 311.0582                | -47.8761    | -110.2972  | 511540.4688 | -7.6195   |
| -7.6009                 |             |            |             |           |
| [30455]ENERGY: 17980000 | 3234.2928   | 5430.6268  | 5492.9601   |           |
| 322.3908                | -14406.8480 | -1762.4030 | 0.0000      | 0.0000    |
| 7936.9443               | 6247.9638   | 310.3743   | -1688.9805  | 6311.9918 |
| 310.8426                | -78.6418    | -10.3184   | 511540.4688 | -5.4412   |
| -5.4386                 |             |            |             |           |
| [30505]ENERGY: 17990000 | 3277.0281   | 5380.7720  | 5505.4475   |           |
| 356.7793                | -14495.0020 | -1735.5776 | 0.0000      | 0.0000    |
| 7958.6139               | 6248.0612   | 311.2217   | -1710.5527  | 6312.3252 |
| 311.0388                | 251.9196    | 130.4654   | 511540.4688 | -6.3643   |
| -6.3642                 |             |            |             |           |
| [30544]ENERGY: 18000000 | 3190.7451   | 5506.6251  | 5501.2052   |           |
| 330.6656                | -14464.0164 | -1706.7502 | 0.0000      | 0.0000    |
| 7892.4363               | 6250.9108   | 308.6338   | -1641.5255  | 6312.0162 |
| 311.0533                | 272.2339    | 78.6677    | 511540.4688 | -3.6207   |
| -3.6314                 |             |            |             |           |
| [30594]ENERGY: 18010000 | 3282.7770   | 5386.7230  | 5461.9413   |           |

## Supplementary Text 6

|                         |             |            |             |           |
|-------------------------|-------------|------------|-------------|-----------|
| 328.9208                | -14365.5870 | -1847.4222 | 0.0000      | 0.0000    |
| 8002.1176               | 6249.4705   | 312.9229   | -1752.6472  | 6312.9993 |
| 311.0016                | 38.7110     | -66.6810   | 511540.4688 | -10.0638  |
| -10.0558                |             |            |             |           |
| [30630]ENERGY: 18020000 | 3286.4957   | 5478.1144  | 5456.9744   |           |
| 318.1460                | -14539.3073 | -1660.0980 | 0.0000      | 0.0000    |
| 7907.1398               | 6247.4651   | 309.2088   | -1659.6748  | 6311.8551 |
| 310.8990                | -22.8525    | -39.6833   | 511540.4688 | -7.7369   |
| -7.7305                 |             |            |             |           |
| [30680]ENERGY: 18030000 | 3225.5459   | 5355.2747  | 5422.5141   |           |
| 338.3119                | -14411.2440 | -1633.2923 | 0.0000      | 0.0000    |
| 7950.6582               | 6247.7684   | 310.9106   | -1702.8898  | 6312.9067 |
| 310.7406                | 257.9958    | 157.0609   | 511540.4688 | -3.4515   |
| -3.4519                 |             |            |             |           |
| [30716]ENERGY: 18040000 | 3270.6241   | 5337.6878  | 5478.2236   |           |
| 331.2534                | -14426.5804 | -1718.0980 | 0.0000      | 0.0000    |
| 7976.8285               | 6249.9389   | 311.9340   | -1726.8896  | 6312.9903 |
| 310.7528                | 31.7160     | 75.8992    | 511540.4688 | -3.3924   |
| -3.4043                 |             |            |             |           |
| [30766]ENERGY: 18050000 | 3289.9209   | 5361.4647  | 5452.6223   |           |
| 308.4136                | -14383.8297 | -1767.9214 | 0.0000      | 0.0000    |
| 7989.0917               | 6249.7621   | 312.4136   | -1739.3296  | 6312.7039 |
| 310.8221                | -25.3770    | -2.8757    | 511540.4688 | -4.4780   |
| -4.4870                 |             |            |             |           |
| [30802]ENERGY: 18060000 | 3192.7051   | 5507.3543  | 5526.1963   |           |
| 322.7807                | -14415.8060 | -1750.7909 | 0.0000      | 0.0000    |
| 7867.2658               | 6249.7053   | 307.6495   | -1617.5605  | 6313.2053 |
| 310.9158                | -72.5384    | -130.7554  | 511540.4688 | -3.4077   |
| -3.4053                 |             |            |             |           |
| [30852]ENERGY: 18070000 | 3312.6213   | 5383.9141  | 5475.9932   |           |
| 303.6089                | -14484.9309 | -1669.8316 | 0.0000      | 0.0000    |
| 7928.1013               | 6249.4764   | 310.0285   | -1678.6249  | 6312.7423 |
| 310.8999                | -102.7433   | -19.6329   | 511540.4688 | -9.7604   |
| -9.7191                 |             |            |             |           |
| [30888]ENERGY: 18080000 | 3274.5990   | 5416.9607  | 5480.6097   |           |
| 340.1343                | -14408.8088 | -1755.8600 | 0.0000      | 0.0000    |
| 7903.8454               | 6251.4803   | 309.0800   | -1652.3651  | 6312.9705 |
| 310.8110                | 146.1825    | 53.5122    | 511540.4688 | -5.5916   |
| -5.6237                 |             |            |             |           |
| [30938]ENERGY: 18090000 | 3318.0000   | 5378.2167  | 5444.5137   |           |
| 336.4354                | -14337.3014 | -1770.2244 | 0.0000      | 0.0000    |
| 7879.6019               | 6249.2420   | 308.1320   | -1630.3600  | 6312.7686 |
| 310.7751                | 93.2455     | -87.7250   | 511540.4688 | -6.7535   |
| -6.7661                 |             |            |             |           |
| [30977]ENERGY: 18100000 | 3290.2640   | 5396.9985  | 5514.4391   |           |
| 307.3428                | -14409.5526 | -1763.2978 | 0.0000      | 0.0000    |
| 7914.4040               | 6250.5979   | 309.4929   | -1663.8061  | 6312.2005 |
| 310.9835                | 59.9343     | -2.9883    | 511540.4688 | -7.2128   |
| -7.2126                 |             |            |             |           |
| [31027]ENERGY: 18110000 | 3250.6788   | 5491.1682  | 5502.2086   |           |
| 328.1868                | -14447.0151 | -1730.3379 | 0.0000      | 0.0000    |
| 7855.6270               | 6250.5165   | 307.1944   | -1605.1105  | 6312.9602 |
| 310.6164                | 79.2551     | -12.6557   | 511540.4688 | -7.8168   |
| -7.8095                 |             |            |             |           |



## Supplementary Text 6

|                         |             |            |             |
|-------------------------|-------------|------------|-------------|
| [31063]ENERGY: 18120000 | 3295.9586   | 5363.9107  | 5463.1851   |
| 342.7515                | -14441.5648 | -1739.0149 | 0.0000      |
| 7962.9673               | 6248.1936   | 311.3920   | -1714.7737  |
| 310.9088                | 70.4056     | 50.4533    | 511540.4688 |
| -3.3413                 |             |            | -3.3497     |
| [31113]ENERGY: 18130000 | 3223.9507   | 5435.4380  | 5487.2109   |
| 346.1296                | -14537.1565 | -1708.7375 | 0.0000      |
| 8000.3368               | 6247.1720   | 312.8533   | -1753.1649  |
| 310.9866                | 40.7330     | 31.8014    | 511540.4688 |
| -7.6205                 |             |            | -7.6315     |
| [31149]ENERGY: 18140000 | 3370.9701   | 5374.3057  | 5489.1175   |
| 334.7818                | -14505.4834 | -1701.9377 | 0.0000      |
| 7885.4687               | 6247.2227   | 308.3614   | -1638.2460  |
| 310.9140                | 4.9286      | -37.2497   | 511540.4688 |
| -9.9742                 |             |            | -9.9564     |
| [31199]ENERGY: 18150000 | 3258.9331   | 5392.7507  | 5442.2412   |
| 323.0660                | -14452.4722 | -1720.0703 | 0.0000      |
| 8003.2007               | 6247.6492   | 312.9653   | -1755.5515  |
| 311.0335                | 127.6009    | 47.1193    | 511540.4688 |
| -5.7551                 |             |            | -5.7512     |
| [31235]ENERGY: 18160000 | 3411.3613   | 5306.1946  | 5481.6747   |
| 322.9800                | -14447.0962 | -1719.2731 | 0.0000      |
| 7892.5625               | 6248.4038   | 308.6388   | -1644.1587  |
| 310.9457                | -47.2564    | -91.6777   | 511540.4688 |
| -10.4570                |             |            | -10.4702    |
| [31285]ENERGY: 18170000 | 3335.8405   | 5435.6508  | 5488.8011   |
| 317.6794                | -14482.3109 | -1735.6939 | 0.0000      |
| 7889.9053               | 6249.8723   | 308.5349   | -1640.0330  |
| 310.9892                | 45.6532     | 18.2497    | 511540.4688 |
| -10.4091                |             |            | -10.4104    |
| [31321]ENERGY: 18180000 | 3216.2471   | 5468.8030  | 5525.7047   |
| 328.1832                | -14540.7653 | -1710.5580 | 0.0000      |
| 7962.3537               | 6249.9685   | 311.3680   | -1712.3852  |
| 310.9613                | 230.7678    | 62.3606    | 511540.4688 |
| -7.0154                 |             |            | -6.9826     |
| [31371]ENERGY: 18190000 | 3246.4608   | 5438.6017  | 5495.2380   |
| 341.4413                | -14457.3819 | -1741.4566 | 0.0000      |
| 7927.5469               | 6250.4502   | 310.0068   | -1677.0967  |
| 311.3717                | 103.7090    | 42.0840    | 511540.4688 |
| -7.1531                 |             |            | -7.1909     |
| [31410]ENERGY: 18200000 | 3397.2785   | 5332.1975  | 5478.5097   |
| 333.3534                | -14466.5636 | -1823.0607 | 0.0000      |
| 7998.1230               | 6249.8377   | 312.7667   | -1748.2852  |
| 311.5435                | -130.8255   | -138.8109  | 511540.4688 |
| -6.4377                 |             |            | -6.4398     |
| [31460]ENERGY: 18210000 | 3290.1056   | 5360.4219  | 5491.2116   |
| 327.6880                | -14519.2938 | -1709.0481 | 0.0000      |
| 8006.4309               | 6247.5161   | 313.0916   | -1758.9147  |
| 311.8660                | 328.3736    | 252.0112   | 511540.4688 |
| -7.6722                 |             |            | -7.6452     |
| [31496]ENERGY: 18220000 | 3306.0052   | 5434.0541  | 5487.2809   |
| 325.9785                | -14444.8551 | -1786.5282 | 0.0000      |
| 7932.0273               | 6253.9626   | 310.1820   | -1678.0646  |
| 311.9803                | -152.5711   | -113.3504  | 511540.4688 |
|                         |             |            | -7.3182     |

## Supplementary Text 6

-7.3018

|                         |             |            |             |
|-------------------------|-------------|------------|-------------|
| [31546]ENERGY: 18230000 | 3297.0557   | 5427.3677  | 5480.9010   |
| 331.1300                | -14506.7856 | -1761.8231 | 0.0000      |
| 7987.1770               | 6255.0227   | 312.3387   | -1732.1543  |
| 311.7926                | 144.9439    | 85.2507    | 511540.4688 |
| -11.3595                |             |            | -11.3638    |

|                         |             |            |             |
|-------------------------|-------------|------------|-------------|
| [31582]ENERGY: 18240000 | 3304.1506   | 5465.2779  | 5465.5248   |
| 326.4395                | -14571.3190 | -1722.4277 | 0.0000      |
| 7984.8472               | 6252.4934   | 312.2476   | -1732.3539  |
| 311.9419                | 29.8304     | 21.2290    | 511540.4688 |
| -4.6190                 |             |            | -4.6056     |

|                         |             |            |             |
|-------------------------|-------------|------------|-------------|
| [31632]ENERGY: 18250000 | 3303.1447   | 5383.9702  | 5440.2456   |
| 314.5769                | -14518.0021 | -1731.6695 | 0.0000      |
| 8056.9484               | 6249.2143   | 315.0671   | -1807.7341  |
| 311.9156                | 134.2600    | 34.9411    | 511540.4688 |
| -8.7040                 |             |            | -8.7157     |

|                         |             |            |             |
|-------------------------|-------------|------------|-------------|
| [31668]ENERGY: 18260000 | 3292.8995   | 5408.7900  | 5483.1694   |
| 332.5478                | -14575.0446 | -1736.2016 | 0.0000      |
| 8045.2587               | 6251.4192   | 314.6100   | -1793.8396  |
| 311.7456                | 19.5420     | 106.0206   | 511540.4688 |
| -6.8896                 |             |            | -6.8948     |

|                         |             |            |             |
|-------------------------|-------------|------------|-------------|
| [31718]ENERGY: 18270000 | 3249.4755   | 5417.2229  | 5541.9042   |
| 307.3579                | -14532.6666 | -1748.0339 | 0.0000      |
| 8017.5417               | 6252.8018   | 313.5261   | -1764.7399  |
| 311.9646                | 57.4561     | 15.8252    | 511540.4688 |
| -12.9310                |             |            | -12.9402    |

|                         |             |            |             |
|-------------------------|-------------|------------|-------------|
| [31754]ENERGY: 18280000 | 3312.4752   | 5391.1449  | 5476.7020   |
| 322.0442                | -14428.7799 | -1749.3498 | 0.0000      |
| 7931.5944               | 6255.8310   | 310.1651   | -1675.7634  |
| 311.7855                | 100.0614    | 17.0083    | 511540.4688 |
| -2.4015                 |             |            | -2.3764     |

|                         |             |            |             |
|-------------------------|-------------|------------|-------------|
| [31804]ENERGY: 18290000 | 3240.3370   | 5433.4425  | 5427.8606   |
| 309.7260                | -14371.4586 | -1797.5800 | 0.0000      |
| 8013.0606               | 6255.3882   | 313.3509   | -1757.6724  |
| 311.8648                | 28.6435     | -24.8926   | 511540.4688 |
| -8.7732                 |             |            | -8.7788     |

|                         |             |            |             |
|-------------------------|-------------|------------|-------------|
| [31843]ENERGY: 18300000 | 3243.2078   | 5450.5653  | 5494.5317   |
| 304.6646                | -14530.4505 | -1729.6654 | 0.0000      |
| 8021.8530               | 6254.7063   | 313.6947   | -1767.1466  |
| 311.7970                | 222.9468    | 149.1392   | 511540.4688 |
| -0.3509                 |             |            | -0.3546     |

|                         |             |            |             |
|-------------------------|-------------|------------|-------------|
| [31893]ENERGY: 18310000 | 3334.9864   | 5406.8867  | 5451.3952   |
| 331.1387                | -14447.8299 | -1744.1848 | 0.0000      |
| 7923.0214               | 6255.4137   | 309.8299   | -1667.6076  |
| 311.8477                | 150.8570    | 63.1619    | 511540.4688 |
| -7.0433                 |             |            | -7.0339     |

|                         |             |            |             |
|-------------------------|-------------|------------|-------------|
| [31929]ENERGY: 18320000 | 3278.0740   | 5382.7417  | 5495.3124   |
| 345.7475                | -14534.3972 | -1701.2169 | 0.0000      |
| 7990.4649               | 6256.7265   | 312.4673   | -1733.7384  |
| 311.5853                | -16.7281    | -30.3410   | 511540.4688 |
| -14.2471                |             |            | -14.2536    |

|                         |             |            |            |
|-------------------------|-------------|------------|------------|
| [31979]ENERGY: 18330000 | 3280.5399   | 5394.4075  | 5536.6141  |
| 305.1122                | -14496.6674 | -1755.9877 | 0.0000     |
| 7989.7939               | 6253.8126   | 312.4410   | -1735.9813 |
|                         |             |            | 6319.3633  |

## Supplementary Text 6

|                         |             |            |             |           |
|-------------------------|-------------|------------|-------------|-----------|
| 311.8180                | 10.3902     | -25.5231   | 511540.4688 | -11.0529  |
| -11.0788                |             |            |             |           |
| [32015]ENERGY: 18340000 | 3230.5906   | 5439.6883  | 5462.0899   |           |
| 319.4904                | -14486.0425 | -1725.9762 | 0.0000      | 0.0000    |
| 8014.7551               | 6254.5956   | 313.4171   | -1760.1594  | 6318.9818 |
| 312.1370                | -9.4191     | -19.7000   | 511540.4688 | -15.1700  |
| -15.1200                |             |            |             |           |
| [32065]ENERGY: 18350000 | 3323.6301   | 5471.3785  | 5500.0191   |           |
| 324.9891                | -14479.0500 | -1740.2518 | 0.0000      | 0.0000    |
| 7855.6472               | 6256.3622   | 307.1952   | -1599.2850  | 6320.3756 |
| 311.9892                | -24.0456    | -45.0583   | 511540.4688 | -9.2356   |
| -9.2753                 |             |            |             |           |
| [32101]ENERGY: 18360000 | 3303.2258   | 5416.4922  | 5516.4708   |           |
| 318.6180                | -14560.4830 | -1689.8714 | 0.0000      | 0.0000    |
| 7951.4885               | 6255.9409   | 310.9431   | -1695.5476  | 6320.2607 |
| 311.9673                | 121.6292    | 33.9773    | 511540.4688 | -16.0984  |
| -16.0921                |             |            |             |           |
| [32151]ENERGY: 18370000 | 3241.0494   | 5322.1254  | 5484.5598   |           |
| 326.2260                | -14452.5759 | -1740.8090 | 0.0000      | 0.0000    |
| 8072.9222               | 6253.4979   | 315.6917   | -1819.4243  | 6319.0840 |
| 311.7833                | 248.4168    | 223.3756   | 511540.4688 | -15.2955  |
| -15.3096                |             |            |             |           |
| [32187]ENERGY: 18380000 | 3265.1963   | 5417.0332  | 5430.3453   |           |
| 333.8546                | -14401.4465 | -1758.9445 | 0.0000      | 0.0000    |
| 7971.3536               | 6257.3919   | 311.7199   | -1713.9617  | 6319.9429 |
| 311.8562                | -12.0967    | 1.6883     | 511540.4688 | -14.8738  |
| -14.8492                |             |            |             |           |
| [32237]ENERGY: 18390000 | 3354.7696   | 5425.0758  | 5523.5073   |           |
| 326.8490                | -14563.6089 | -1766.3774 | 0.0000      | 0.0000    |
| 7958.0782               | 6258.2935   | 311.2008   | -1699.7846  | 6319.5058 |
| 311.8685                | 78.4428     | 41.2471    | 511540.4688 | -17.0954  |
| -17.1154                |             |            |             |           |
| [32276]ENERGY: 18400000 | 3246.1676   | 5387.6965  | 5513.4931   |           |
| 347.6298                | -14431.5703 | -1795.1057 | 0.0000      | 0.0000    |
| 7988.4566               | 6256.7675   | 312.3887   | -1731.6891  | 6320.1286 |
| 311.8973                | -113.6601   | -105.3620  | 511540.4688 | -10.0643  |
| -10.0526                |             |            |             |           |
| [32326]ENERGY: 18410000 | 3240.8539   | 5418.4171  | 5520.6607   |           |
| 351.5913                | -14437.2740 | -1773.0603 | 0.0000      | 0.0000    |
| 7936.4363               | 6257.6250   | 310.3545   | -1678.8113  | 6320.2302 |
| 312.0244                | 53.6274     | -86.3821   | 511540.4688 | -12.5405  |
| -12.5608                |             |            |             |           |
| [32362]ENERGY: 18420000 | 3254.2403   | 5392.8911  | 5459.6322   |           |
| 324.4460                | -14532.8761 | -1683.2196 | 0.0000      | 0.0000    |
| 8038.6666               | 6253.7805   | 314.3522   | -1784.8861  | 6319.3076 |
| 312.0238                | 11.6919     | -12.2564   | 511540.4688 | -19.8663  |
| -19.8445                |             |            |             |           |
| [32412]ENERGY: 18430000 | 3271.5316   | 5386.1205  | 5528.6033   |           |
| 355.2885                | -14449.8330 | -1722.6147 | 0.0000      | 0.0000    |
| 7891.6632               | 6260.7594   | 308.6036   | -1630.9038  | 6322.2155 |
| 312.1095                | 188.7172    | 126.9199   | 511540.4688 | -17.4588  |
| -17.4653                |             |            |             |           |
| [32448]ENERGY: 18440000 | 3284.6558   | 5450.8084  | 5450.4128   |           |
| 315.1292                | -14545.6301 | -1723.9275 | 0.0000      | 0.0000    |

## Supplementary Text 6

|                         |             |            |             |           |
|-------------------------|-------------|------------|-------------|-----------|
| 8023.5883               | 6255.0370   | 313.7625   | -1768.5514  | 6320.9094 |
| 312.0462                | 86.0726     | 38.4626    | 511540.4688 | -17.4394  |
| -17.4216                |             |            |             |           |
| [32498]ENERGY: 18450000 | 3325.6433   | 5462.9680  | 5476.9399   |           |
| 349.8683                | -14577.0309 | -1690.0774 | 0.0000      | 0.0000    |
| 7911.2322               | 6259.5435   | 309.3689   | -1651.6888  | 6320.3672 |
| 312.1071                | 82.6869     | 94.1077    | 511540.4688 | -18.8958  |
| -18.9156                |             |            |             |           |
| [32534]ENERGY: 18460000 | 3267.1374   | 5540.6109  | 5459.9851   |           |
| 311.8238                | -14484.7226 | -1738.1045 | 0.0000      | 0.0000    |
| 7898.2157               | 6254.9457   | 308.8598   | -1643.2700  | 6319.5559 |
| 312.1041                | -94.7104    | 25.5683    | 511540.4688 | -18.0376  |
| -18.0035                |             |            |             |           |
| [32584]ENERGY: 18470000 | 3296.0525   | 5464.1304  | 5458.2702   |           |
| 329.9413                | -14580.6850 | -1724.5755 | 0.0000      | 0.0000    |
| 8013.8361               | 6256.9701   | 313.3812   | -1756.8660  | 6321.3925 |
| 312.1842                | 64.4808     | -56.7914   | 511540.4688 | -16.3587  |
| -16.3766                |             |            |             |           |
| [32620]ENERGY: 18480000 | 3286.6908   | 5519.2391  | 5510.7265   |           |
| 352.6487                | -14537.1787 | -1730.2299 | 0.0000      | 0.0000    |
| 7859.5571               | 6261.4536   | 307.3481   | -1598.1034  | 6322.7499 |
| 312.0921                | 252.8033    | 207.7496   | 511540.4688 | -11.0551  |
| -11.0615                |             |            |             |           |
| [32670]ENERGY: 18490000 | 3314.0699   | 5359.6022  | 5502.3279   |           |
| 356.8719                | -14532.5086 | -1736.5169 | 0.0000      | 0.0000    |
| 7994.7043               | 6258.5508   | 312.6330   | -1736.1534  | 6323.0210 |
| 311.9090                | -24.4775    | -112.1540  | 511540.4688 | -7.1808   |
| -7.1807                 |             |            |             |           |
| [32709]ENERGY: 18500000 | 3285.8031   | 5503.6242  | 5455.6287   |           |
| 320.2102                | -14524.2291 | -1706.1422 | 0.0000      | 0.0000    |
| 7925.6380               | 6260.5328   | 309.9322   | -1665.1053  | 6322.9395 |
| 311.9685                | 227.2218    | 80.2517    | 511540.4688 | -13.8046  |
| -13.7921                |             |            |             |           |
| [32759]ENERGY: 18510000 | 3349.1232   | 5386.3967  | 5509.1094   |           |
| 323.0495                | -14470.3727 | -1738.8090 | 0.0000      | 0.0000    |
| 7904.1284               | 6262.6256   | 309.0911   | -1641.5028  | 6323.2271 |
| 311.9922                | -52.1116    | -72.4442   | 511540.4688 | -18.6780  |
| -18.6952                |             |            |             |           |
| [32795]ENERGY: 18520000 | 3301.5931   | 5434.7619  | 5483.9777   |           |
| 331.3684                | -14557.8848 | -1702.7746 | 0.0000      | 0.0000    |
| 7969.2247               | 6260.2662   | 311.6367   | -1708.9584  | 6322.2542 |
| 311.9415                | 58.5993     | -37.9011   | 511540.4688 | -9.5039   |
| -9.4942                 |             |            |             |           |
| [32845]ENERGY: 18530000 | 3229.8815   | 5443.4161  | 5504.0022   |           |
| 322.1601                | -14484.5010 | -1654.4934 | 0.0000      | 0.0000    |
| 7902.1915               | 6262.6570   | 309.0153   | -1639.5345  | 6322.4857 |
| 312.0298                | 55.2784     | 30.2285    | 511540.4688 | -12.2221  |
| -12.2275                |             |            |             |           |
| [32881]ENERGY: 18540000 | 3348.1335   | 5431.7248  | 5503.6273   |           |
| 349.2924                | -14526.4202 | -1746.9508 | 0.0000      | 0.0000    |
| 7903.9179               | 6263.3248   | 309.0828   | -1640.5930  | 6321.9134 |
| 311.8701                | -27.3196    | -139.5731  | 511540.4688 | -11.6250  |
| -11.6182                |             |            |             |           |
| [32931]ENERGY: 18550000 | 3321.9662   | 5305.9279  | 5548.5364   |           |

## Supplementary Text 6

|                         |             |            |             |           |
|-------------------------|-------------|------------|-------------|-----------|
| 334.9355                | -14474.2378 | -1785.8140 | 0.0000      | 0.0000    |
| 8002.4805               | 6253.7946   | 312.9371   | -1748.6859  | 6322.8781 |
| 311.7140                | -57.3410    | -21.8566   | 511540.4688 | -11.7341  |
| -11.7171                |             |            |             |           |
| [32967]ENERGY: 18560000 | 3328.1979   | 5440.4572  | 5542.7823   |           |
| 326.1248                | -14501.3934 | -1752.3621 | 0.0000      | 0.0000    |
| 7876.8012               | 6260.6079   | 308.0224   | -1616.1933  | 6323.3688 |
| 311.7454                | 53.6021     | 20.7177    | 511540.4688 | -13.4301  |
| -13.4473                |             |            |             |           |
| [33017]ENERGY: 18570000 | 3309.3930   | 5435.3979  | 5483.1643   |           |
| 331.3634                | -14477.6898 | -1785.0656 | 0.0000      | 0.0000    |
| 7964.7741               | 6261.3374   | 311.4626   | -1703.4367  | 6324.7429 |
| 311.8679                | -79.1768    | -204.8586  | 511540.4688 | -13.1247  |
| -13.1369                |             |            |             |           |
| [33053]ENERGY: 18580000 | 3275.4819   | 5493.3126  | 5529.0520   |           |
| 344.2885                | -14532.8090 | -1769.0282 | 0.0000      | 0.0000    |
| 7921.5366               | 6261.8345   | 309.7718   | -1659.7021  | 6324.5917 |
| 311.9364                | 30.8134     | 121.6444   | 511540.4688 | -10.0472  |
| -10.0186                |             |            |             |           |
| [33103]ENERGY: 18590000 | 3264.2713   | 5442.3716  | 5476.0951   |           |
| 313.9900                | -14447.5690 | -1680.5395 | 0.0000      | 0.0000    |
| 7898.0564               | 6266.6758   | 308.8536   | -1631.3806  | 6326.2968 |
| 311.8736                | 330.1584    | 176.9410   | 511540.4688 | -9.3140   |
| -9.3536                 |             |            |             |           |
| [33142]ENERGY: 18600000 | 3314.9490   | 5421.0806  | 5482.6750   |           |
| 351.6953                | -14485.0075 | -1756.1024 | 0.0000      | 0.0000    |
| 7933.5100               | 6262.8000   | 310.2400   | -1670.7100  | 6326.2293 |
| 311.9713                | 26.1118     | -16.7763   | 511540.4688 | -13.7760  |
| -13.7554                |             |            |             |           |
| [33192]ENERGY: 18610000 | 3356.4244   | 5370.5876  | 5499.7653   |           |
| 321.8150                | -14596.1771 | -1694.8050 | 0.0000      | 0.0000    |
| 8004.4377               | 6262.0479   | 313.0137   | -1742.3897  | 6327.0318 |
| 312.1300                | 165.6787    | 105.1525   | 511540.4688 | -10.1663  |
| -10.1506                |             |            |             |           |
| [33228]ENERGY: 18620000 | 3275.1276   | 5435.5014  | 5517.2182   |           |
| 328.9026                | -14466.4170 | -1764.9608 | 0.0000      | 0.0000    |
| 7939.4134               | 6264.7853   | 310.4709   | -1674.6280  | 6326.8269 |
| 312.0269                | -149.4775   | -189.1304  | 511540.4688 | -16.9283  |
| -16.9361                |             |            |             |           |
| [33278]ENERGY: 18630000 | 3222.4654   | 5468.1431  | 5490.2342   |           |
| 356.7478                | -14475.8372 | -1734.3821 | 0.0000      | 0.0000    |
| 7932.6068               | 6259.9780   | 310.2047   | -1672.6289  | 6326.9727 |
| 312.1501                | -197.9371   | -144.6106  | 511540.4688 | -7.2567   |
| -7.2726                 |             |            |             |           |
| [33314]ENERGY: 18640000 | 3255.1627   | 5415.2510  | 5507.6781   |           |
| 315.0119                | -14496.4542 | -1748.5468 | 0.0000      | 0.0000    |
| 8014.8635               | 6262.9662   | 313.4214   | -1751.8973  | 6326.8415 |
| 312.0168                | 132.8885    | 210.7379   | 511540.4688 | -8.1646   |
| -8.1381                 |             |            |             |           |
| [33364]ENERGY: 18650000 | 3267.7107   | 5492.3699  | 5512.5530   |           |
| 294.7125                | -14485.3818 | -1715.0312 | 0.0000      | 0.0000    |
| 7897.7132               | 6264.6462   | 308.8402   | -1633.0670  | 6327.3859 |
| 312.0498                | -176.6486   | -111.5959  | 511540.4688 | -7.8238   |
| -7.8395                 |             |            |             |           |

## Supplementary Text 6

|                         |             |            |             |           |
|-------------------------|-------------|------------|-------------|-----------|
| [33400]ENERGY: 18660000 | 3289.6014   | 5364.2160  | 5493.7293   |           |
| 323.6721                | -14458.1323 | -1693.1278 | 0.0000      | 0.0000    |
| 7945.3211               | 6265.2798   | 310.7019   | -1680.0413  | 6329.1416 |
| 312.1255                | 222.6781    | 78.7672    | 511540.4688 | -13.1080  |
| -13.1205                |             |            |             |           |
| [33450]ENERGY: 18670000 | 3337.5417   | 5474.6365  | 5448.6568   |           |
| 325.4520                | -14464.3104 | -1753.6810 | 0.0000      | 0.0000    |
| 7895.6013               | 6263.8969   | 308.7576   | -1631.7045  | 6329.7151 |
| 312.2643                | -1.0859     | -42.3998   | 511540.4688 | -9.5510   |
| -9.5494                 |             |            |             |           |
| [33486]ENERGY: 18680000 | 3307.4175   | 5440.8675  | 5555.3208   |           |
| 348.8607                | -14555.3172 | -1756.8638 | 0.0000      | 0.0000    |
| 7925.1477               | 6265.4331   | 309.9130   | -1659.7146  | 6330.1332 |
| 312.2139                | -93.4994    | -52.0744   | 511540.4688 | -12.7346  |
| -12.7157                |             |            |             |           |
| [33536]ENERGY: 18690000 | 3383.6633   | 5466.0000  | 5461.2365   |           |
| 335.1010                | -14495.3374 | -1867.0358 | 0.0000      | 0.0000    |
| 7983.4455               | 6267.0731   | 312.1928   | -1716.3724  | 6330.6310 |
| 312.2070                | -248.6163   | -141.3744  | 511540.4688 | -16.8272  |
| -16.8510                |             |            |             |           |
| [33575]ENERGY: 18700000 | 3236.3238   | 5452.0824  | 5509.5267   |           |
| 307.7933                | -14464.4287 | -1740.6714 | 0.0000      | 0.0000    |
| 7963.6134               | 6264.2394   | 311.4172   | -1699.3740  | 6330.2745 |
| 311.9917                | -91.5087    | -6.6490    | 511540.4688 | -15.7680  |
| -15.7389                |             |            |             |           |
| [33625]ENERGY: 18710000 | 3276.3447   | 5403.8274  | 5493.7062   |           |
| 317.7361                | -14448.8949 | -1707.8005 | 0.0000      | 0.0000    |
| 7931.3286               | 6266.2476   | 310.1547   | -1665.0809  | 6329.8619 |
| 311.9907                | -39.9556    | 85.4800    | 511540.4688 | -20.2215  |
| -20.2464                |             |            |             |           |
| [33661]ENERGY: 18720000 | 3379.8916   | 5365.2583  | 5535.2437   |           |
| 314.7474                | -14470.0027 | -1725.9782 | 0.0000      | 0.0000    |
| 7871.2116               | 6270.3717   | 307.8039   | -1600.8400  | 6331.9270 |
| 312.3124                | 7.2275      | -49.4284   | 511540.4688 | -13.4567  |
| -13.4603                |             |            |             |           |
| [33711]ENERGY: 18730000 | 3327.4042   | 5440.2042  | 5477.6198   |           |
| 338.6304                | -14525.2509 | -1739.3608 | 0.0000      | 0.0000    |
| 7947.7970               | 6267.0439   | 310.7987   | -1680.7531  | 6332.9161 |
| 312.0917                | -143.9895   | -111.9702  | 511540.4688 | -12.9066  |
| -12.8939                |             |            |             |           |
| [33747]ENERGY: 18740000 | 3392.7898   | 5377.1261  | 5486.0327   |           |
| 337.9579                | -14488.6710 | -1723.7781 | 0.0000      | 0.0000    |
| 7884.2371               | 6265.6945   | 308.3132   | -1618.5426  | 6331.8226 |
| 312.3346                | -130.5871   | -135.1653  | 511540.4688 | -14.3325  |
| -14.3308                |             |            |             |           |
| [33797]ENERGY: 18750000 | 3229.7147   | 5411.4327  | 5484.0848   |           |
| 322.6467                | -14467.5642 | -1689.2672 | 0.0000      | 0.0000    |
| 7974.7223               | 6265.7698   | 311.8516   | -1708.9525  | 6331.1896 |
| 312.3674                | 190.1629    | 223.1561   | 511540.4688 | -18.4058  |
| -18.4095                |             |            |             |           |
| [33833]ENERGY: 18760000 | 3311.2294   | 5429.1393  | 5498.5577   |           |
| 350.8217                | -14490.4674 | -1711.8427 | 0.0000      | 0.0000    |
| 7880.1762               | 6267.6142   | 308.1544   | -1612.5619  | 6332.3634 |
| 312.2676                | 21.8402     | 16.1952    | 511540.4688 | -18.0856  |

Supplementary Text 6

-18.0785  
 [33883]ENERGY: 18770000      3272.9222      5473.4882      5500.7209  
 320.1075      -14519.9949      -1697.0905      0.0000      0.0000  
 7917.9765      6268.1298      309.6326      -1649.8466      6332.7725  
 312.2704      121.4018      112.5330      511540.4688      -17.1218  
 -17.1322  
 [33919]ENERGY: 18780000      3336.9937      5398.6715      5507.7274  
 334.6612      -14522.5467      -1761.2580      0.0000      0.0000  
 7976.0172      6270.2664      311.9023      -1705.7508      6333.1824  
 312.2771      -130.1232      -85.3133      511540.4688      -19.6694  
 -19.6642  
 [33969]ENERGY: 18790000      3387.8205      5323.1921      5549.3542  
 317.8420      -14434.5030      -1789.0760      0.0000      0.0000  
 7916.2794      6270.9093      309.5662      -1645.3702      6332.8715  
 312.2650      -66.3661      -3.4344      511540.4688      -22.1600  
 -22.1753  
 [34008]ENERGY: 18800000      3300.6542      5410.6652      5520.0817  
 334.0939      -14522.2243      -1756.0511      0.0000      0.0000  
 7982.5196      6269.7393      312.1566      -1712.7803      6334.2656  
 312.1162      249.2711      85.5895      511540.4688      -20.0442  
 -20.0503  
 [34058]ENERGY: 18810000      3322.8879      5402.6057      5528.0371  
 349.1598      -14549.3843      -1739.8565      0.0000      0.0000  
 7955.5983      6269.0480      311.1038      -1686.5503      6334.1506  
 312.4232      -70.3095      -31.4614      511540.4688      -12.7266  
 -12.6986  
 [34094]ENERGY: 18820000      3252.7004      5387.9346      5439.6396  
 339.0220      -14466.3865      -1715.1158      0.0000      0.0000  
 8026.6470      6264.4413      313.8822      -1762.2058      6334.2089  
 312.3595      59.4637      30.2790      511540.4688      -14.1813  
 -14.2092  
 [34144]ENERGY: 18830000      3168.7049      5436.0552      5540.2695  
 321.7423      -14516.5917      -1765.5532      0.0000      0.0000  
 8081.1403      6265.7673      316.0131      -1815.3731      6333.1580  
 312.2746      90.5604      -10.2896      511540.4688      -17.0542  
 -17.0304  
 [34180]ENERGY: 18840000      3385.7213      5363.5231      5472.1361  
 323.3332      -14444.9507      -1763.4313      0.0000      0.0000  
 7934.8591      6271.1908      310.2928      -1663.6683      6334.0306  
 312.1446      -216.2525      -218.5611      511540.4688      -18.7896  
 -18.8140  
 [34230]ENERGY: 18850000      3383.1852      5396.1860      5540.2586  
 313.3268      -14488.2836      -1796.5351      0.0000      0.0000  
 7920.2586      6268.3966      309.7218      -1651.8620      6332.9382  
 312.2004      135.3300      14.2495      511540.4688      -20.2072  
 -20.1959  
 [34266]ENERGY: 18860000      3276.0861      5344.0877      5556.0710  
 335.8007      -14482.1994      -1769.6518      0.0000      0.0000  
 8010.4636      6270.6578      313.2493      -1739.8058      6333.5835  
 312.2981      184.3535      84.2982      511540.4688      -19.5533  
 -19.5478  
 [34316]ENERGY: 18870000      3247.0719      5336.9670      5572.0648  
 338.0869      -14493.5466      -1726.9514      0.0000      0.0000  
 7994.3126      6268.0053      312.6177      -1726.3073      6332.4542

## Supplementary Text 6

|                         |             |            |             |           |
|-------------------------|-------------|------------|-------------|-----------|
| 312.1806                | 63.4643     | -27.7155   | 511540.4688 | -20.5050  |
| -20.4967                |             |            |             |           |
| [34352]ENERGY: 18880000 | 3349.4856   | 5389.7401  | 5531.8747   |           |
| 336.9949                | -14467.8272 | -1769.0192 | 0.0000      | 0.0000    |
| 7898.4840               | 6269.7330   | 308.8703   | -1628.7510  | 6334.9028 |
| 312.0694                | -177.8308   | -217.4994  | 511540.4688 | -17.7860  |
| -17.7868                |             |            |             |           |
| [34402]ENERGY: 18890000 | 3314.8275   | 5398.0998  | 5507.4354   |           |
| 330.8006                | -14517.7155 | -1706.6314 | 0.0000      | 0.0000    |
| 7944.8271               | 6271.6434   | 310.6826   | -1673.1837  | 6334.3093 |
| 312.1490                | -24.4877    | -47.9010   | 511540.4688 | -21.1121  |
| -21.1218                |             |            |             |           |
| [34441]ENERGY: 18900000 | 3260.1243   | 5396.0528  | 5489.4613   |           |
| 325.3588                | -14447.4814 | -1689.2987 | 0.0000      | 0.0000    |
| 7937.9600               | 6272.1770   | 310.4140   | -1665.7829  | 6334.7909 |
| 312.3181                | 256.5011    | 163.0970   | 511540.4688 | -17.4115  |
| -17.4181                |             |            |             |           |
| [34491]ENERGY: 18910000 | 3344.5252   | 5416.7596  | 5502.0865   |           |
| 329.7433                | -14610.7322 | -1668.2433 | 0.0000      | 0.0000    |
| 7959.7057               | 6273.8448   | 311.2644   | -1685.8609  | 6334.9986 |
| 312.3533                | -117.5563   | -31.4535   | 511540.4688 | -21.7656  |
| -21.7351                |             |            |             |           |
| [34527]ENERGY: 18920000 | 3344.7187   | 5443.3365  | 5494.1947   |           |
| 334.0727                | -14456.0703 | -1838.9931 | 0.0000      | 0.0000    |
| 7949.8174               | 6271.0766   | 310.8777   | -1678.7408  | 6335.8594 |
| 312.2391                | -148.0041   | -191.5330  | 511540.4688 | -22.0837  |
| -22.1112                |             |            |             |           |
| [34577]ENERGY: 18930000 | 3231.4800   | 5477.5196  | 5487.7107   |           |
| 328.4751                | -14471.7076 | -1704.7187 | 0.0000      | 0.0000    |
| 7922.0975               | 6270.8566   | 309.7937   | -1651.2409  | 6335.2631 |
| 312.3879                | -22.0956    | -6.4288    | 511540.4688 | -20.9113  |
| -20.9172                |             |            |             |           |
| [34613]ENERGY: 18940000 | 3247.1533   | 5437.4851  | 5545.3065   |           |
| 309.8454                | -14430.0396 | -1845.2133 | 0.0000      | 0.0000    |
| 8009.8512               | 6274.3888   | 313.2254   | -1735.4625  | 6336.4537 |
| 312.2421                | 7.9768      | -50.5525   | 511540.4688 | -19.9235  |
| -19.8925                |             |            |             |           |
| [34663]ENERGY: 18950000 | 3234.9575   | 5477.8173  | 5510.3801   |           |
| 322.3012                | -14515.2345 | -1750.9915 | 0.0000      | 0.0000    |
| 7993.2562               | 6272.4864   | 312.5764   | -1720.7699  | 6335.5767 |
| 312.1272                | -27.1162    | 55.8385    | 511540.4688 | -23.6063  |
| -23.6131                |             |            |             |           |
| [34699]ENERGY: 18960000 | 3242.7329   | 5463.2380  | 5547.9801   |           |
| 345.6511                | -14471.4478 | -1803.2353 | 0.0000      | 0.0000    |
| 7945.7880               | 6270.7068   | 310.7202   | -1675.0812  | 6335.3250 |
| 312.2218                | -115.6354   | -34.0118   | 511540.4688 | -21.4912  |
| -21.5065                |             |            |             |           |
| [34749]ENERGY: 18970000 | 3251.9201   | 5284.6807  | 5496.6905   |           |
| 316.7344                | -14389.8253 | -1739.9554 | 0.0000      | 0.0000    |
| 8051.7656               | 6272.0105   | 314.8644   | -1779.7551  | 6335.0989 |
| 312.3708                | 52.0235     | 0.0231     | 511540.4688 | -18.8790  |
| -18.8928                |             |            |             |           |
| [34785]ENERGY: 18980000 | 3176.6010   | 5433.9569  | 5491.6161   |           |
| 331.6690                | -14464.0532 | -1713.8148 | 0.0000      | 0.0000    |



## Supplementary Text 6

|                         |             |            |             |           |
|-------------------------|-------------|------------|-------------|-----------|
| 8012.0649               | 6268.0397   | 313.3119   | -1744.0252  | 6336.2619 |
| 312.5193                | 179.6567    | 86.9394    | 511540.4688 | -22.2691  |
| -22.2510                |             |            |             |           |
| [34835]ENERGY: 18990000 | 3331.9179   | 5348.3810  | 5512.8696   |           |
| 298.6427                | -14520.6415 | -1766.2938 | 0.0000      | 0.0000    |
| 8067.3147               | 6272.1906   | 315.4725   | -1795.1241  | 6336.0425 |
| 312.5596                | -93.2068    | -148.3865  | 511540.4688 | -16.4056  |
| -16.4242                |             |            |             |           |
| [34874]ENERGY: 19000000 | 3250.4510   | 5405.9051  | 5484.2569   |           |
| 336.2402                | -14475.4244 | -1776.7465 | 0.0000      | 0.0000    |
| 8043.7611               | 6268.4434   | 314.5514   | -1775.3178  | 6335.1531 |
| 312.5550                | -254.7963   | -291.0894  | 511540.4688 | -20.7468  |
| -20.7303                |             |            |             |           |
| [34924]ENERGY: 19010000 | 3260.0126   | 5461.7772  | 5517.5418   |           |
| 324.4290                | -14426.2545 | -1825.0488 | 0.0000      | 0.0000    |
| 7957.9998               | 6270.4571   | 311.1977   | -1687.5428  | 6337.0646 |
| 312.6140                | -410.2070   | -384.6288  | 511540.4688 | -20.6324  |
| -20.6136                |             |            |             |           |
| [34960]ENERGY: 19020000 | 3278.9052   | 5399.7841  | 5508.9083   |           |
| 328.7105                | -14501.9152 | -1698.5989 | 0.0000      | 0.0000    |
| 7958.7504               | 6274.5443   | 311.2271   | -1684.2061  | 6336.9167 |
| 312.4681                | 170.6390    | 123.3560   | 511540.4688 | -18.7951  |
| -18.8087                |             |            |             |           |
| [35010]ENERGY: 19030000 | 3190.2842   | 5407.2336  | 5486.0245   |           |
| 337.8895                | -14479.3795 | -1692.0580 | 0.0000      | 0.0000    |
| 8022.8839               | 6272.8781   | 313.7350   | -1750.0058  | 6337.4062 |
| 312.4488                | 3.9521      | -99.6136   | 511540.4688 | -18.2055  |
| -18.2266                |             |            |             |           |
| [35046]ENERGY: 19040000 | 3310.5741   | 5393.1002  | 5493.2010   |           |
| 320.0869                | -14408.9866 | -1801.9503 | 0.0000      | 0.0000    |
| 7970.0939               | 6276.1194   | 311.6706   | -1693.9746  | 6337.3985 |
| 312.5428                | 39.7018     | -29.8419   | 511540.4688 | -22.2858  |
| -22.2589                |             |            |             |           |
| [35096]ENERGY: 19050000 | 3327.8088   | 5363.5714  | 5465.1123   |           |
| 333.0725                | -14494.8916 | -1762.8174 | 0.0000      | 0.0000    |
| 8037.2052               | 6269.0612   | 314.2950   | -1768.1440  | 6337.0850 |
| 312.2224                | -53.4578    | -131.2234  | 511540.4688 | -20.6470  |
| -20.6517                |             |            |             |           |
| [35132]ENERGY: 19060000 | 3383.8658   | 5465.8617  | 5544.8223   |           |
| 338.2031                | -14550.2857 | -1741.6023 | 0.0000      | 0.0000    |
| 7834.9047               | 6275.7696   | 306.3841   | -1559.1351  | 6338.0512 |
| 312.3099                | -0.9688     | -29.5567   | 511540.4688 | -18.3999  |
| -18.3883                |             |            |             |           |
| [35182]ENERGY: 19070000 | 3300.2157   | 5478.6759  | 5452.1207   |           |
| 343.6547                | -14640.2079 | -1675.9864 | 0.0000      | 0.0000    |
| 8014.2453               | 6272.7179   | 313.3972   | -1741.5274  | 6338.3764 |
| 312.3352                | -20.3547    | -42.2013   | 511540.4688 | -21.3707  |
| -21.3939                |             |            |             |           |
| [35218]ENERGY: 19080000 | 3224.6383   | 5446.8103  | 5511.6612   |           |
| 310.6846                | -14536.2201 | -1747.1220 | 0.0000      | 0.0000    |
| 8057.6635               | 6268.1158   | 315.0951   | -1789.5476  | 6338.1065 |
| 312.5427                | -71.1166    | -96.6608   | 511540.4688 | -21.6930  |
| -21.6866                |             |            |             |           |
| [35268]ENERGY: 19090000 | 3258.5656   | 5356.8183  | 5505.1667   |           |

## Supplementary Text 6

|                         |             |            |             |           |
|-------------------------|-------------|------------|-------------|-----------|
| 344.2663                | -14470.8303 | -1830.8428 | 0.0000      | 0.0000    |
| 8107.8514               | 6270.9951   | 317.0577   | -1836.8563  | 6339.0937 |
| 312.4627                | 30.7370     | -103.9081  | 511540.4688 | -18.8676  |
| -18.8711                |             |            |             |           |
| [35307]ENERGY: 19100000 | 3285.2216   | 5406.6664  | 5495.9281   |           |
| 332.2512                | -14532.1444 | -1699.8313 | 0.0000      | 0.0000    |
| 7987.1356               | 6275.2271   | 312.3371   | -1711.9085  | 6337.5467 |
| 312.6424                | -23.4119    | -104.1394  | 511540.4688 | -19.1777  |
| -19.1782                |             |            |             |           |
| [35357]ENERGY: 19110000 | 3310.1551   | 5393.2824  | 5453.9517   |           |
| 324.2313                | -14475.8343 | -1752.6666 | 0.0000      | 0.0000    |
| 8020.2679               | 6273.3875   | 313.6327   | -1746.8804  | 6337.5729 |
| 312.8486                | 115.2574    | 106.7532   | 511540.4688 | -14.6338  |
| -14.6206                |             |            |             |           |
| [35393]ENERGY: 19120000 | 3269.9669   | 5509.1494  | 5508.4959   |           |
| 315.3390                | -14569.8164 | -1761.8654 | 0.0000      | 0.0000    |
| 7999.4551               | 6270.7245   | 312.8188   | -1728.7305  | 6337.8377 |
| 312.8248                | -1.0040     | -42.0199   | 511540.4688 | -16.8913  |
| -16.9005                |             |            |             |           |
| [35443]ENERGY: 19130000 | 3319.2888   | 5414.3417  | 5513.4509   |           |
| 327.1060                | -14536.3483 | -1720.1248 | 0.0000      | 0.0000    |
| 7955.6355               | 6273.3498   | 311.1052   | -1682.2857  | 6337.7849 |
| 312.6041                | 57.7096     | -0.0736    | 511540.4688 | -14.2012  |
| -14.2309                |             |            |             |           |
| [35479]ENERGY: 19140000 | 3320.9864   | 5414.8829  | 5463.9028   |           |
| 340.7973                | -14536.8718 | -1723.1770 | 0.0000      | 0.0000    |
| 7989.6236               | 6270.1443   | 312.4344   | -1719.4793  | 6336.6359 |
| 312.8575                | -46.8984    | -92.9387   | 511540.4688 | -18.4385  |
| -18.4098                |             |            |             |           |
| [35529]ENERGY: 19150000 | 3317.5662   | 5415.9019  | 5470.9024   |           |
| 326.8647                | -14412.3710 | -1831.7030 | 0.0000      | 0.0000    |
| 7986.6973               | 6273.8585   | 312.3199   | -1712.8388  | 6338.1298 |
| 312.9933                | -46.7131    | -46.2283   | 511540.4688 | -14.8481  |
| -14.8340                |             |            |             |           |
| [35565]ENERGY: 19160000 | 3295.4401   | 5485.4140  | 5504.1747   |           |
| 326.3021                | -14543.8931 | -1784.5077 | 0.0000      | 0.0000    |
| 7987.6554               | 6270.5854   | 312.3574   | -1717.0700  | 6338.3036 |
| 313.0096                | -13.6331    | -42.8763   | 511540.4688 | -17.3365  |
| -17.3482                |             |            |             |           |
| [35615]ENERGY: 19170000 | 3286.1840   | 5469.2213  | 5453.3297   |           |
| 300.4907                | -14546.3872 | -1735.8293 | 0.0000      | 0.0000    |
| 8047.3191               | 6274.3283   | 314.6905   | -1772.9909  | 6338.7535 |
| 312.8406                | -75.3601    | -23.9111   | 511540.4688 | -11.7398  |
| -11.7430                |             |            |             |           |
| [35651]ENERGY: 19180000 | 3280.9257   | 5385.3026  | 5514.2518   |           |
| 348.9234                | -14496.6187 | -1811.3083 | 0.0000      | 0.0000    |
| 8049.3713               | 6270.8478   | 314.7708   | -1778.5236  | 6339.0625 |
| 312.8447                | -123.5408   | -68.2527   | 511540.4688 | -13.7958  |
| -13.7870                |             |            |             |           |
| [35701]ENERGY: 19190000 | 3345.3521   | 5473.0541  | 5465.1502   |           |
| 309.8840                | -14495.6702 | -1769.0646 | 0.0000      | 0.0000    |
| 7946.7115               | 6275.4171   | 310.7563   | -1671.2943  | 6339.0165 |
| 312.9412                | -1.7196     | -34.5368   | 511540.4688 | -14.5623  |
| -14.5782                |             |            |             |           |

## Supplementary Text 6

|                         |             |            |             |
|-------------------------|-------------|------------|-------------|
| [35740]ENERGY: 19200000 | 3341.5141   | 5402.9324  | 5492.6058   |
| 320.4917                | -14479.6236 | -1741.5915 | 0.0000      |
| 7937.7475               | 6274.0763   | 310.4057   | -1663.6711  |
| 312.8803                | -162.7575   | -182.7522  | 511540.4688 |
| -18.9215                |             |            | -18.9457    |
| [35790]ENERGY: 19210000 | 3282.6366   | 5360.8115  | 5492.5449   |
| 299.2371                | -14567.9441 | -1707.5146 | 0.0000      |
| 8109.3374               | 6269.1088   | 317.1158   | -1840.2286  |
| 312.7799                | -51.3278    | -48.1277   | 511540.4688 |
| -17.4366                |             |            | -17.4216    |
| [35826]ENERGY: 19220000 | 3326.0238   | 5370.7298  | 5508.5460   |
| 332.5398                | -14458.6253 | -1743.6311 | 0.0000      |
| 7940.1728               | 6275.7558   | 310.5006   | -1664.4170  |
| 312.6775                | 26.4004     | -94.4379   | 511540.4688 |
| -16.7372                |             |            | -16.7134    |
| [35876]ENERGY: 19230000 | 3339.3736   | 5453.5273  | 5508.4472   |
| 333.9255                | -14574.1933 | -1802.8322 | 0.0000      |
| 8013.1774               | 6271.4254   | 313.3554   | -1741.7520  |
| 312.7808                | -200.1752   | -167.1522  | 511540.4688 |
| -18.5478                |             |            | -18.5824    |
| [35912]ENERGY: 19240000 | 3269.0404   | 5410.3016  | 5506.1748   |
| 323.8922                | -14552.3058 | -1679.4255 | 0.0000      |
| 7997.0369               | 6274.7145   | 312.7243   | -1722.3224  |
| 312.7226                | -68.2972    | 37.5808    | 511540.4688 |
| -9.7173                 |             |            | -9.7050     |
| [35962]ENERGY: 19250000 | 3333.0101   | 5345.6749  | 5484.7862   |
| 323.8367                | -14506.0168 | -1750.8338 | 0.0000      |
| 8039.9667               | 6270.4240   | 314.4030   | -1769.5427  |
| 312.8209                | 21.8593     | 30.1964    | 511540.4688 |
| -14.1558                |             |            | -14.1613    |
| [35998]ENERGY: 19260000 | 3375.8352   | 5411.9104  | 5501.9801   |
| 335.0428                | -14596.0127 | -1734.7252 | 0.0000      |
| 7980.1609               | 6274.1915   | 312.0643   | -1705.9695  |
| 313.0045                | -34.3261    | -13.1655   | 511540.4688 |
| -13.9847                |             |            | -13.9898    |
| [36048]ENERGY: 19270000 | 3343.4393   | 5395.0218  | 5482.5191   |
| 325.3715                | -14470.8491 | -1725.3778 | 0.0000      |
| 7927.9510               | 6278.0757   | 310.0226   | -1649.8753  |
| 312.8578                | 130.4134    | 142.5603   | 511540.4688 |
| -15.6006                |             |            | -15.5969    |
| [36084]ENERGY: 19280000 | 3296.6757   | 5446.7291  | 5500.0555   |
| 299.6604                | -14545.7611 | -1748.5692 | 0.0000      |
| 8026.2323               | 6275.0226   | 313.8659   | -1751.2097  |
| 312.7840                | 226.4179    | 121.9703   | 511540.4688 |
| -9.7125                 |             |            | -9.7207     |
| [36134]ENERGY: 19290000 | 3342.6976   | 5372.4630  | 5524.1263   |
| 332.5330                | -14517.9308 | -1731.7985 | 0.0000      |
| 7951.1946               | 6273.2854   | 310.9316   | -1677.9093  |
| 312.6577                | 24.6212     | -64.5170   | 511540.4688 |
| -12.6245                |             |            | -12.6222    |
| [36173]ENERGY: 19300000 | 3333.7441   | 5423.4904  | 5461.5852   |
| 330.7218                | -14439.0358 | -1834.3634 | 0.0000      |
| 7999.3359               | 6275.4781   | 312.8142   | -1723.8578  |
| 312.7751                | -10.0955    | -46.9603   | 511540.4688 |
|                         |             |            | -12.1207    |

Supplementary Text 6

-12.1309  
 [36223]ENERGY: 19310000      3264.9610      5421.5025      5518.4652  
 348.5467      -14503.9808      -1766.3870      0.0000      0.0000  
 7991.3151      6274.4227      312.5005      -1716.8925      6338.9466  
 312.9235      147.4654      9.3542      511540.4688      -11.6335  
 -11.6239  
 [36259]ENERGY: 19320000      3287.8844      5453.0378      5478.4270  
 347.8641      -14442.9818      -1789.1449      0.0000      0.0000  
 7940.2044      6275.2912      310.5018      -1664.9132      6339.8177  
 312.9197      -86.7478      -115.2956      511540.4688      -11.8022  
 -11.8066  
 [36309]ENERGY: 19330000      3293.7475      5446.8718      5508.2985  
 317.0487      -14442.0883      -1832.2266      0.0000      0.0000  
 7984.5541      6276.2057      312.2361      -1708.3483      6340.0932  
 312.8600      8.9809      37.5778      511540.4688      -11.2054  
 -11.1874  
 [36345]ENERGY: 19340000      3287.4152      5345.7780      5466.0066  
 343.1691      -14404.8606      -1804.9094      0.0000      0.0000  
 8045.0251      6277.6240      314.6008      -1767.4012      6340.8964  
 312.7051      -84.4511      -137.2181      511540.4688      -11.6904  
 -11.7277  
 [36395]ENERGY: 19350000      3264.2644      5468.5521      5542.1054  
 333.5265      -14445.1103      -1836.6800      0.0000      0.0000  
 7948.2340      6274.8921      310.8158      -1673.3419      6340.8616  
 312.8275      -105.8341      -185.9291      511540.4688      -7.1298  
 -7.1232  
 [36431]ENERGY: 19360000      3311.2950      5495.1603      5516.5584  
 345.2803      -14549.7583      -1792.0271      0.0000      0.0000  
 7952.3552      6278.8638      310.9770      -1673.4914      6340.0898  
 312.7551      3.8139      19.6182      511540.4688      -12.3899  
 -12.3712  
 [36481]ENERGY: 19370000      3291.2395      5481.7436      5503.0360  
 337.5004      -14506.2885      -1750.4408      0.0000      0.0000  
 7920.0557      6276.8458      309.7139      -1643.2099      6338.9824  
 312.8272      94.2892      -25.7765      511540.4688      -9.4712  
 -9.4870  
 [36517]ENERGY: 19380000      3254.4463      5425.4166      5527.7950  
 315.0160      -14482.8394      -1760.5890      0.0000      0.0000  
 7992.7540      6271.9996      312.5568      -1720.7544      6338.7023  
 312.8753      -9.6635      12.8805      511540.4688      -9.4028  
 -9.3957  
 [36567]ENERGY: 19390000      3308.3246      5458.2366      5538.1910  
 329.4144      -14474.1177      -1812.1399      0.0000      0.0000  
 7927.9288      6275.8378      310.0218      -1652.0910      6339.6038  
 312.9941      58.7034      -10.4027      511540.4688      -11.4577  
 -11.4619  
 [36606]ENERGY: 19400000      3265.0125      5384.1508      5463.9895  
 328.9893      -14519.9494      -1671.4903      0.0000      0.0000  
 8024.1485      6274.8509      313.7844      -1749.2976      6338.3818  
 312.8980      87.6009      104.9093      511540.4688      -12.8287  
 -12.8205  
 [36656]ENERGY: 19410000      3269.9944      5355.3531      5504.5322  
 315.8511      -14428.8816      -1772.2602      0.0000      0.0000  
 8031.0048      6275.5938      314.0526      -1755.4110      6339.1324

## Supplementary Text 6

|                         |             |            |             |           |
|-------------------------|-------------|------------|-------------|-----------|
| 312.9531                | -52.8102    | -81.9747   | 511540.4688 | -8.9147   |
| -8.9215                 |             |            |             |           |
| [36692]ENERGY: 19420000 | 3292.4797   | 5422.5678  | 5533.6384   |           |
| 336.9204                | -14577.5244 | -1734.4771 | 0.0000      | 0.0000    |
| 7999.5951               | 6273.2000   | 312.8243   | -1726.3951  | 6338.3677 |
| 313.0721                | 178.1092    | 91.4844    | 511540.4688 | -12.3061  |
| -12.3109                |             |            |             |           |
| [36742]ENERGY: 19430000 | 3257.6723   | 5408.6551  | 5553.3443   |           |
| 328.7334                | -14464.2475 | -1794.3038 | 0.0000      | 0.0000    |
| 7984.3721               | 6274.2258   | 312.2290   | -1710.1462  | 6339.4018 |
| 312.9542                | 16.6739     | -37.9264   | 511540.4688 | -15.5364  |
| -15.5334                |             |            |             |           |
| [36778]ENERGY: 19440000 | 3278.3168   | 5445.2260  | 5444.6232   |           |
| 330.4331                | -14482.9052 | -1761.5596 | 0.0000      | 0.0000    |
| 8019.0117               | 6273.1461   | 313.5836   | -1745.8656  | 6338.5735 |
| 312.9320                | 235.2552    | 88.4667    | 511540.4688 | -3.9250   |
| -3.9424                 |             |            |             |           |
| [36828]ENERGY: 19450000 | 3305.5838   | 5434.9055  | 5469.4610   |           |
| 323.3534                | -14459.7540 | -1884.5335 | 0.0000      | 0.0000    |
| 8080.2421               | 6269.2582   | 315.9780   | -1810.9838  | 6340.6740 |
| 312.8231                | -49.0039    | 55.6601    | 511540.4688 | -15.4818  |
| -15.4400                |             |            |             |           |
| [36864]ENERGY: 19460000 | 3299.0995   | 5362.0352  | 5515.6678   |           |
| 325.9355                | -14510.1254 | -1757.9370 | 0.0000      | 0.0000    |
| 8033.6617               | 6268.3375   | 314.1565   | -1765.3242  | 6339.6900 |
| 312.8640                | 135.1028    | 49.4972    | 511540.4688 | -10.3258  |
| -10.3545                |             |            |             |           |
| [36914]ENERGY: 19470000 | 3294.7329   | 5388.4475  | 5470.4718   |           |
| 315.0857                | -14446.2864 | -1816.0245 | 0.0000      | 0.0000    |
| 8067.4503               | 6273.8773   | 315.4778   | -1793.5729  | 6340.3094 |
| 312.8173                | -159.1642   | -100.3429  | 511540.4688 | -10.0495  |
| -10.0519                |             |            |             |           |
| [36950]ENERGY: 19480000 | 3259.7491   | 5366.9096  | 5479.9594   |           |
| 348.4955                | -14485.4961 | -1708.2623 | 0.0000      | 0.0000    |
| 8017.5071               | 6278.8623   | 313.5247   | -1738.6448  | 6340.6586 |
| 312.9205                | 207.9216    | 98.2389    | 511540.4688 | -7.6425   |
| -7.6440                 |             |            |             |           |
| [37000]ENERGY: 19490000 | 3185.6887   | 5350.8683  | 5543.1174   |           |
| 313.1165                | -14463.1966 | -1683.8201 | 0.0000      | 0.0000    |
| 8029.8663               | 6275.6404   | 314.0080   | -1754.2259  | 6339.7554 |
| 313.0316                | 142.6191    | 56.8887    | 511540.4688 | -7.8236   |
| -7.8223                 |             |            |             |           |
| [37039]ENERGY: 19500000 | 3321.2303   | 5338.9123  | 5502.1106   |           |
| 332.9028                | -14513.9372 | -1765.2776 | 0.0000      | 0.0000    |
| 8061.1092               | 6277.0505   | 315.2298   | -1784.0587  | 6340.1752 |
| 312.9971                | 15.3384     | 16.3890    | 511540.4688 | -9.1771   |
| -9.1627                 |             |            |             |           |
| [37089]ENERGY: 19510000 | 3295.0835   | 5403.1678  | 5484.9515   |           |
| 305.5352                | -14560.8932 | -1735.3245 | 0.0000      | 0.0000    |
| 8083.3646               | 6275.8849   | 316.1001   | -1807.4798  | 6340.6190 |
| 313.1131                | 75.4226     | 54.2235    | 511540.4688 | -8.9108   |
| -8.9035                 |             |            |             |           |
| [37125]ENERGY: 19520000 | 3320.1213   | 5397.8866  | 5471.2717   |           |
| 323.5609                | -14468.1176 | -1690.8394 | 0.0000      | 0.0000    |

## Supplementary Text 6

|                         |             |            |             |           |
|-------------------------|-------------|------------|-------------|-----------|
| 7926.8907               | 6280.7741   | 309.9812   | -1646.1166  | 6341.3411 |
| 313.2459                | 65.2881     | 103.8221   | 511540.4688 | -7.1934   |
| -7.1861                 |             |            |             |           |
| [37175]ENERGY: 19530000 | 3252.2219   | 5458.9779  | 5474.0781   |           |
| 341.9569                | -14500.3528 | -1732.6398 | 0.0000      | 0.0000    |
| 7983.2681               | 6277.5103   | 312.1858   | -1705.7578  | 6341.4114 |
| 313.0831                | -80.0249    | 6.1189     | 511540.4688 | -9.1222   |
| -9.1232                 |             |            |             |           |
| [37211]ENERGY: 19540000 | 3228.3590   | 5368.9013  | 5462.2040   |           |
| 329.3424                | -14504.1121 | -1680.9370 | 0.0000      | 0.0000    |
| 8072.9480               | 6276.7054   | 315.6928   | -1796.2425  | 6342.1887 |
| 313.3083                | 183.5685    | 97.3307    | 511540.4688 | -7.0938   |
| -7.1073                 |             |            |             |           |
| [37261]ENERGY: 19550000 | 3265.3876   | 5469.6448  | 5507.9257   |           |
| 354.9694                | -14542.0434 | -1721.1135 | 0.0000      | 0.0000    |
| 7940.1205               | 6274.8911   | 310.4985   | -1665.2294  | 6340.8932 |
| 313.2251                | 14.4080     | -42.3275   | 511540.4688 | -12.2419  |
| -12.2440                |             |            |             |           |
| [37297]ENERGY: 19560000 | 3253.0213   | 5369.2434  | 5486.6397   |           |
| 322.2446                | -14539.6352 | -1705.3244 | 0.0000      | 0.0000    |
| 8087.2557               | 6273.4451   | 316.2523   | -1813.8106  | 6341.1394 |
| 313.3217                | 146.0244    | 76.6321    | 511540.4688 | -4.8415   |
| -4.8442                 |             |            |             |           |
| [37347]ENERGY: 19570000 | 3282.2877   | 5425.8070  | 5447.8982   |           |
| 308.1144                | -14484.5238 | -1776.0490 | 0.0000      | 0.0000    |
| 8069.2759               | 6272.8104   | 315.5492   | -1796.4654  | 6341.0537 |
| 313.2716                | 2.8819      | -13.8681   | 511540.4688 | -12.0853  |
| -12.0709                |             |            |             |           |
| [37383]ENERGY: 19580000 | 3307.7981   | 5397.8395  | 5424.0188   |           |
| 312.6772                | -14508.1914 | -1712.7565 | 0.0000      | 0.0000    |
| 8054.0620               | 6275.4476   | 314.9542   | -1778.6144  | 6341.3242 |
| 313.4193                | -43.3858    | 112.2257   | 511540.4688 | -5.5303   |
| -5.5406                 |             |            |             |           |
| [37433]ENERGY: 19590000 | 3340.9030   | 5409.3134  | 5490.8849   |           |
| 338.1472                | -14534.2995 | -1785.3002 | 0.0000      | 0.0000    |
| 8018.8342               | 6278.4830   | 313.5766   | -1740.3511  | 6341.6916 |
| 313.2856                | -71.5379    | -63.0084   | 511540.4688 | -9.6151   |
| -9.6090                 |             |            |             |           |
| [37472]ENERGY: 19600000 | 3208.5520   | 5418.6733  | 5452.4167   |           |
| 319.0451                | -14481.2244 | -1703.6432 | 0.0000      | 0.0000    |
| 8061.7131               | 6275.5326   | 315.2534   | -1786.1806  | 6342.3217 |
| 313.2211                | 176.7461    | 37.4657    | 511540.4688 | -6.7871   |
| -6.8152                 |             |            |             |           |
| [37522]ENERGY: 19610000 | 3273.8003   | 5396.6360  | 5503.4644   |           |
| 331.6778                | -14457.5284 | -1770.0999 | 0.0000      | 0.0000    |
| 8000.1768               | 6278.1270   | 312.8470   | -1722.0498  | 6341.9634 |
| 313.3381                | -142.5698   | -250.0814  | 511540.4688 | -9.1928   |
| -9.1817                 |             |            |             |           |
| [37558]ENERGY: 19620000 | 3265.5740   | 5394.6030  | 5463.4709   |           |
| 300.0607                | -14438.6004 | -1816.6591 | 0.0000      | 0.0000    |
| 8105.2823               | 6273.7314   | 316.9572   | -1831.5509  | 6341.3679 |
| 313.3908                | -203.9543   | -109.4073  | 511540.4688 | -11.6472  |
| -11.6379                |             |            |             |           |
| [37608]ENERGY: 19630000 | 3309.0410   | 5415.3600  | 5488.3405   |           |

## Supplementary Text 6

|                         |             |            |             |           |
|-------------------------|-------------|------------|-------------|-----------|
| 343.9572                | -14508.1345 | -1772.1928 | 0.0000      | 0.0000    |
| 8002.8416               | 6279.2129   | 312.9512   | -1723.6286  | 6342.1939 |
| 313.2801                | 61.9989     | -46.1482   | 511540.4688 | -6.7869   |
| -6.7884                 |             |            |             |           |
| [37644]ENERGY: 19640000 | 3328.3277   | 5454.4764  | 5452.1852   |           |
| 316.4285                | -14539.4635 | -1750.7490 | 0.0000      | 0.0000    |
| 8012.4200               | 6273.6253   | 313.3258   | -1738.7946  | 6341.6209 |
| 313.3107                | -112.8846   | -63.6989   | 511540.4688 | -6.2525   |
| -6.2573                 |             |            |             |           |
| [37694]ENERGY: 19650000 | 3220.1929   | 5413.9695  | 5494.0053   |           |
| 325.2934                | -14452.1462 | -1714.3431 | 0.0000      | 0.0000    |
| 7991.8874               | 6278.8591   | 312.5229   | -1713.0283  | 6341.9837 |
| 313.2836                | -128.4037   | -83.3408   | 511540.4688 | -6.4967   |
| -6.4715                 |             |            |             |           |
| [37730]ENERGY: 19660000 | 3299.7982   | 5430.6115  | 5501.7664   |           |
| 353.4649                | -14546.4381 | -1786.2099 | 0.0000      | 0.0000    |
| 8022.7062               | 6275.6993   | 313.7280   | -1747.0069  | 6342.6070 |
| 313.2248                | -93.6826    | -144.3482  | 511540.4688 | -8.9828   |
| -8.9743                 |             |            |             |           |
| [37780]ENERGY: 19670000 | 3316.6900   | 5408.8159  | 5439.7758   |           |
| 327.3549                | -14436.0237 | -1800.8149 | 0.0000      | 0.0000    |
| 8019.8083               | 6275.6062   | 313.6147   | -1744.2021  | 6341.1835 |
| 313.1927                | -31.9553    | -18.5514   | 511540.4688 | -6.9663   |
| -6.9872                 |             |            |             |           |
| [37816]ENERGY: 19680000 | 3397.1901   | 5393.4828  | 5507.6585   |           |
| 310.4354                | -14468.1638 | -1732.9303 | 0.0000      | 0.0000    |
| 7872.5536               | 6280.2262   | 307.8563   | -1592.3273  | 6341.8812 |
| 313.0741                | 33.5031     | 111.0854   | 511540.4688 | -9.3689   |
| -9.3771                 |             |            |             |           |
| [37866]ENERGY: 19690000 | 3314.2520   | 5449.7816  | 5434.2014   |           |
| 326.6309                | -14583.7120 | -1692.5991 | 0.0000      | 0.0000    |
| 8028.7474               | 6277.3024   | 313.9643   | -1751.4451  | 6342.7849 |
| 313.2677                | 186.9702    | 111.5709   | 511540.4688 | -6.7132   |
| -6.7177                 |             |            |             |           |
| [37905]ENERGY: 19700000 | 3267.5534   | 5430.0676  | 5439.7517   |           |
| 334.8203                | -14436.9195 | -1729.9296 | 0.0000      | 0.0000    |
| 7970.8348               | 6276.1786   | 311.6996   | -1694.6562  | 6342.2699 |
| 313.1153                | -168.7134   | -109.2283  | 511540.4688 | -10.1901  |
| -10.1764                |             |            |             |           |
| [37955]ENERGY: 19710000 | 3344.4597   | 5411.5363  | 5508.1089   |           |
| 348.4748                | -14495.1944 | -1734.3484 | 0.0000      | 0.0000    |
| 7898.0193               | 6281.0561   | 308.8522   | -1616.9632  | 6342.6847 |
| 313.1594                | 74.1125     | 46.0778    | 511540.4688 | -10.6648  |
| -10.6740                |             |            |             |           |
| [37991]ENERGY: 19720000 | 3359.8772   | 5409.0731  | 5494.3497   |           |
| 341.3469                | -14443.7701 | -1736.2423 | 0.0000      | 0.0000    |
| 7856.4216               | 6281.0562   | 307.2255   | -1575.3655  | 6344.3555 |
| 313.1275                | 11.3069     | 45.5886    | 511540.4688 | -7.5492   |
| -7.5590                 |             |            |             |           |
| [38041]ENERGY: 19730000 | 3251.6429   | 5448.4910  | 5481.9240   |           |
| 327.5517                | -14468.5051 | -1760.1379 | 0.0000      | 0.0000    |
| 7998.9021               | 6279.8687   | 312.7972   | -1719.0335  | 6343.6197 |
| 313.2718                | -55.2248    | -13.6354   | 511540.4688 | -7.5870   |
| -7.5771                 |             |            |             |           |

## Supplementary Text 6

|                         |             |            |             |
|-------------------------|-------------|------------|-------------|
| [38077]ENERGY: 19740000 | 3290.6718   | 5428.6461  | 5479.2757   |
| 327.5151                | -14539.6491 | -1685.9273 | 0.0000      |
| 7978.5512               | 6279.0837   | 312.0014   | -1699.4675  |
| 313.0439                | 322.0595    | 197.4161   | 511540.4688 |
| -10.8841                |             |            | -10.8676    |
| [38127]ENERGY: 19750000 | 3421.4653   | 5386.1328  | 5495.1431   |
| 320.6825                | -14598.5357 | -1755.6100 | 0.0000      |
| 8010.7060               | 6279.9839   | 313.2588   | -1730.7220  |
| 313.3769                | -7.1669     | -43.8233   | 511540.4688 |
| -11.1927                |             |            | -11.2035    |
| [38163]ENERGY: 19760000 | 3348.0350   | 5433.9049  | 5495.9519   |
| 313.0079                | -14541.5506 | -1732.3790 | 0.0000      |
| 7964.6465               | 6281.6167   | 311.4576   | -1683.0298  |
| 313.3155                | 134.1117    | 1.6592     | 511540.4688 |
| -7.7706                 |             |            | -7.7567     |
| [38213]ENERGY: 19770000 | 3339.4812   | 5434.1579  | 5432.6414   |
| 348.4336                | -14448.5044 | -1700.8032 | 0.0000      |
| 7878.4242               | 6283.8306   | 308.0859   | -1594.5935  |
| 313.2486                | 53.0417     | -33.0350   | 511540.4688 |
| -9.9047                 |             |            | -9.8980     |
| [38249]ENERGY: 19780000 | 3298.3313   | 5361.3762  | 5430.9579   |
| 319.5976                | -14527.8544 | -1699.3204 | 0.0000      |
| 8094.9284               | 6278.0166   | 316.5523   | -1816.9118  |
| 313.1707                | 116.4069    | 66.0934    | 511540.4688 |
| -9.7344                 |             |            | -9.7597     |
| [38299]ENERGY: 19790000 | 3321.9172   | 5392.7372  | 5478.8182   |
| 330.8436                | -14523.3532 | -1727.4559 | 0.0000      |
| 8006.5084               | 6280.0155   | 313.0946   | -1726.4929  |
| 313.3934                | -14.4298    | -3.1936    | 511540.4688 |
| -9.3486                 |             |            | -9.3508     |
| [38338]ENERGY: 19800000 | 3240.0579   | 5425.0041  | 5471.6620   |
| 325.7426                | -14492.9452 | -1734.8176 | 0.0000      |
| 8048.0622               | 6282.7659   | 314.7196   | -1765.2962  |
| 313.1742                | -31.9915    | -57.2793   | 511540.4688 |
| -11.6003                |             |            | -11.5986    |
| [38388]ENERGY: 19810000 | 3278.8474   | 5475.9397  | 5480.1033   |
| 333.7345                | -14476.7739 | -1744.6109 | 0.0000      |
| 7940.8516               | 6288.0918   | 310.5271   | -1652.7598  |
| 313.1133                | 132.5600    | 50.7229    | 511540.4688 |
| -8.1925                 |             |            | -8.1969     |
| [38424]ENERGY: 19820000 | 3266.5447   | 5362.0415  | 5437.5639   |
| 322.1917                | -14399.4708 | -1725.6651 | 0.0000      |
| 8020.3856               | 6283.5914   | 313.6373   | -1736.7941  |
| 313.1311                | 290.2345    | 177.7850   | 511540.4688 |
| -12.2241                |             |            | -12.2070    |
| [38474]ENERGY: 19830000 | 3262.3069   | 5434.6990  | 5452.1268   |
| 331.7101                | -14540.0720 | -1667.7448 | 0.0000      |
| 8009.0751               | 6282.1011   | 313.1950   | -1726.9739  |
| 313.0322                | 105.3354    | 144.7432   | 511540.4688 |
| -8.6908                 |             |            | -8.7169     |
| [38510]ENERGY: 19840000 | 3234.0132   | 5431.6690  | 5392.1474   |
| 315.6961                | -14477.4749 | -1698.6708 | 0.0000      |
| 8085.6295               | 6283.0095   | 316.1887   | -1802.6200  |
| 313.1057                | 33.1267     | 1.0263     | 511540.4688 |
|                         |             |            | -9.6398     |



Supplementary Text 6

-9.6730  
 [38560]ENERGY: 19850000      3266.3101      5422.9977      5457.6613  
 313.4761      -14522.4486      -1760.6811      0.0000      0.0000  
 8099.3563      6276.6719      316.7255      -1822.6845      6347.3462  
 312.8957      -192.3175      -202.4579      511540.4688      -9.3761  
 -9.3535  
 [38596]ENERGY: 19860000      3363.4815      5385.3501      5467.4367  
 330.6980      -14501.1324      -1757.1668      0.0000      0.0000  
 7995.9053      6284.5724      312.6800      -1711.3329      6349.1180  
 313.2722      -20.3090      -74.9329      511540.4688      -5.9894  
 -5.9785  
 [38646]ENERGY: 19870000      3291.2985      5360.9779      5512.6636  
 357.4143      -14480.7152      -1741.0189      0.0000      0.0000  
 7984.6796      6285.3000      312.2410      -1699.3796      6347.8297  
 313.1938      -76.5125      -48.4054      511540.4688      -7.4797  
 -7.4769  
 [38682]ENERGY: 19880000      3338.1678      5426.2753      5515.4684  
 306.3684      -14551.4526      -1749.6305      0.0000      0.0000  
 7997.4645      6282.6612      312.7410      -1714.8033      6347.6565  
 313.0909      54.4506      10.7777      511540.4688      -7.8549  
 -7.8884  
 [38732]ENERGY: 19890000      3334.0258      5354.1621      5531.8007  
 321.5773      -14594.4372      -1691.7416      0.0000      0.0000  
 8024.8074      6280.1944      313.8102      -1744.6130      6347.4223  
 312.9846      -203.5945      -149.5055      511540.4688      -7.3394  
 -7.3254  
 [38771]ENERGY: 19900000      3327.1174      5472.4450      5439.9215  
 337.6913      -14486.5507      -1773.1535      0.0000      0.0000  
 7969.9983      6287.4692      311.6669      -1682.5291      6348.0169  
 313.2179      -6.7699      -13.3770      511540.4688      -7.3749  
 -7.3853  
 [38821]ENERGY: 19910000      3366.8001      5366.1406      5542.8974  
 322.1939      -14536.3866      -1761.4172      0.0000      0.0000  
 7984.2135      6284.4418      312.2228      -1699.7717      6347.0100  
 313.3263      -173.8696      -5.0099      511540.4688      -4.3410  
 -4.3268  
 [38857]ENERGY: 19920000      3264.1718      5366.2550      5482.6732  
 325.2803      -14501.1949      -1675.7892      0.0000      0.0000  
 8021.4319      6282.8282      313.6782      -1738.6037      6346.5448  
 313.2303      162.1848      212.0061      511540.4688      -5.6638  
 -5.6780  
 [38907]ENERGY: 19930000      3239.5623      5365.8819      5534.5929  
 346.0860      -14529.9213      -1743.3731      0.0000      0.0000  
 8067.2587      6280.0874      315.4703      -1787.1713      6346.4171  
 313.2006      -15.1980      -82.3019      511540.4688      -9.9478  
 -9.9501  
 [38943]ENERGY: 19940000      3295.9541      5373.9427      5477.1966  
 333.0617      -14529.5821      -1751.9804      0.0000      0.0000  
 8084.6088      6283.2014      316.1488      -1801.4074      6348.7690  
 313.3016      -10.8421      25.1344      511540.4688      -12.0348  
 -12.0201  
 [38993]ENERGY: 19950000      3283.1376      5460.4273      5489.0294  
 323.6608      -14554.4299      -1733.0587      0.0000      0.0000  
 8011.0544      6279.8209      313.2724      -1731.2335      6347.9608

Supplementary Text 6

|                |             |            |             |           |
|----------------|-------------|------------|-------------|-----------|
| 313.3701       | 9.9561      | -11.1576   | 511540.4688 | -8.0893   |
| -8.0950        |             |            |             |           |
| [39029]ENERGY: | 19960000    | 3298.1547  | 5414.1389   | 5492.9488 |
| 319.0960       | -14514.6728 | -1790.0019 | 0.0000      | 0.0000    |
| 8062.8552      | 6282.5189   | 315.2981   | -1780.3363  | 6348.2417 |
| 313.3849       | 25.3539     | -54.7394   | 511540.4688 | -10.4924  |
| -10.4827       |             |            |             |           |
| [39079]ENERGY: | 19970000    | 3273.7679  | 5409.6799   | 5475.8623 |
| 334.9780       | -14423.9228 | -1842.3267 | 0.0000      | 0.0000    |
| 8053.2784      | 6281.3171   | 314.9236   | -1771.9613  | 6346.9244 |
| 313.3732       | -209.4287   | -141.8078  | 511540.4688 | -8.3008   |
| -8.3110        |             |            |             |           |
| [39115]ENERGY: | 19980000    | 3335.5807  | 5437.4711   | 5454.4191 |
| 330.7873       | -14425.2756 | -1846.5869 | 0.0000      | 0.0000    |
| 8000.3306      | 6286.7264   | 312.8531   | -1713.6042  | 6347.3191 |
| 313.3555       | -43.5071    | -84.1041   | 511540.4688 | -9.2114   |
| -9.1993        |             |            |             |           |
| [39165]ENERGY: | 19990000    | 3350.1422  | 5392.3097   | 5491.6825 |
| 325.0803       | -14479.3541 | -1753.8957 | 0.0000      | 0.0000    |
| 7954.5387      | 6280.5036   | 311.0624   | -1674.0351  | 6346.8094 |
| 313.2877       | 2.1243      | -31.2519   | 511540.4688 | -11.0988  |
| -11.1120       |             |            |             |           |
| [39204]ENERGY: | 20000000    | 3352.8457  | 5374.7234   | 5461.8607 |
| 331.4245       | -14437.3686 | -1778.3423 | 0.0000      | 0.0000    |
| 7981.8801      | 6287.0235   | 312.1315   | -1694.8566  | 6347.0740 |
| 313.0697       | 1.4789      | -128.9643  | 511540.4688 | -9.9421   |
| -9.9520        |             |            |             |           |

40.1ns Q5NAT0 SIMULATION DATA

|              | TS<br>ELECT<br>TOTAL<br>PRESSURE | BOND<br>VDW<br>TEMP<br>GPRESSURE | ANGLE<br>BOUNDARY<br>POTENTIAL<br>VOLUME | DIHED<br>MISC<br>TOTAL3<br>PRESSAVG | IMPRP<br>KINETIC<br>TEMPAVG<br>GPRESSAVG |
|--------------|----------------------------------|----------------------------------|------------------------------------------|-------------------------------------|------------------------------------------|
| [192]ENERGY: | 0                                | 4683.0396                        | 5161.8033                                | 5250.3882                           | 306.8334                                 |
|              | -10081.5245                      | -1805.4586                       | 0.0000                                   | 0.0000                              | 7393.9912                                |
|              | 10909.0727                       | 295.7613                         | 3515.0815                                | 11012.7278                          | 295.7613                                 |
|              | 2697.6206                        | 398.5367                         | 686386.8863                              | 2697.6206                           | 398.5367                                 |
| [280]ENERGY: | 10000                            | 3179.2743                        | 5058.8267                                | 5311.6943                           | 355.7430                                 |
|              | -15021.8723                      | -1674.5847                       | 0.0000                                   | 0.0000                              | 7587.1364                                |
|              | 4796.2178                        | 303.4872                         | -2790.9186                               | 4860.7764                           | 322.3989                                 |
|              | -82.5392                         | -18.9135                         | 672387.9418                              | -1.2609                             | -1.1551                                  |
| [319]ENERGY: | 20000                            | 3141.5211                        | 4981.9891                                | 5279.4834                           | 369.4766                                 |
|              | -15202.3680                      | -1655.7454                       | 0.0000                                   | 0.0000                              | 7500.6846                                |
|              | 4415.0413                        | 300.0291                         | -3085.6433                               | 4472.6539                           | 300.4789                                 |
|              | 37.9836                          | 53.0530                          | 698024.9507                              | 1.8096                              | 1.8279                                   |
| [371]ENERGY: | 30000                            | 3128.2969                        | 5047.9974                                | 5351.8320                           | 339.2491                                 |
|              | -15294.7699                      | -1723.0906                       | 0.0000                                   | 0.0000                              | 7479.8344                                |
|              | 4329.3493                        | 299.1951                         | -3150.4850                               | 4392.0901                           | 298.2180                                 |
|              | 45.0358                          | 55.3733                          | 692726.1275                              | 1.0559                              | 1.0596                                   |
| [409]ENERGY: | 40000                            | 3062.2959                        | 4915.5486                                | 5367.8251                           | 318.7022                                 |
|              | -15242.8011                      | -1637.7519                       | 0.0000                                   | 0.0000                              | 7480.6200                                |
|              | 4264.4389                        | 299.2265                         | -3216.1811                               | 4322.8023                           | 297.5825                                 |
|              | 248.5802                         | 223.1176                         | 701542.2779                              | 6.2008                              | 6.2109                                   |

## Supplementary Text 6

|                      |             |             |           |           |
|----------------------|-------------|-------------|-----------|-----------|
| [461]ENERGY: 50000   | 3114.1617   | 5034.4429   | 5274.3527 | 332.5935  |
| -15208.4339          | -1743.8920  | 0.0000      | 0.0000    | 7411.4709 |
| 4214.6959            | 296.4605    | -3196.7750  | 4272.8341 | 298.4510  |
| -103.0185            | -100.7097   | 704384.8430 | -0.3675   | -0.3619   |
| [499]ENERGY: 60000   | 3097.8642   | 5036.8064   | 5240.2388 | 343.9810  |
| -15265.4221          | -1744.6155  | 0.0000      | 0.0000    | 7442.5076 |
| 4151.3604            | 297.7020    | -3291.1472  | 4212.9153 | 298.0233  |
| -34.7921             | 3.0120      | 699868.2769 | 0.6415    | 0.6211    |
| [550]ENERGY: 70000   | 3074.5542   | 5053.4172   | 5273.9797 | 317.6805  |
| -15226.1987          | -1767.4160  | 0.0000      | 0.0000    | 7367.8019 |
| 4093.8189            | 294.7138    | -3273.9831  | 4153.0377 | 298.1102  |
| 40.0759              | 34.8112     | 698526.4767 | -1.2876   | -1.2894   |
| [587]ENERGY: 80000   | 3070.6400   | 5057.7975   | 5284.0248 | 321.8735  |
| -15316.1261          | -1737.8328  | 0.0000      | 0.0000    | 7377.5988 |
| 4057.9757            | 295.1056    | -3319.6230  | 4114.9641 | 297.7017  |
| -22.7557             | 72.0622     | 720049.7578 | -1.6671   | -1.6594   |
| [638]ENERGY: 90000   | 3188.7484   | 5057.0386   | 5268.2942 | 339.2538  |
| -15338.4012          | -1686.8652  | 0.0000      | 0.0000    | 7427.4300 |
| 4255.4986            | 297.0989    | -3171.9314  | 4315.6071 | 297.4097  |
| -52.0524             | -1.5799     | 714893.7784 | 0.4332    | 0.4270    |
| [678]ENERGY: 100000  | 3122.6054   | 5003.7403   | 5249.5625 | 336.5185  |
| -15303.4820          | -1710.5339  | 0.0000      | 0.0000    | 7404.7576 |
| 4103.1684            | 296.1920    | -3301.5892  | 4163.1204 | 299.3055  |
| -80.0537             | -24.8176    | 696932.0826 | 1.7566    | 1.7731    |
| [729]ENERGY: 110000  | 3160.8026   | 4973.3056   | 5281.4846 | 316.5356  |
| -15270.1713          | -1847.1071  | 0.0000      | 0.0000    | 7406.1703 |
| 4021.0204            | 296.2485    | -3385.1499  | 4082.4161 | 296.8630  |
| -77.0907             | -27.8147    | 686244.0339 | 2.4133    | 2.4224    |
| [765]ENERGY: 120000  | 3138.1472   | 5022.4709   | 5280.5085 | 327.5227  |
| -15341.0587          | -1783.2466  | 0.0000      | 0.0000    | 7410.1731 |
| 4054.5172            | 296.4086    | -3355.6559  | 4118.8734 | 297.6333  |
| -197.2839            | -156.7220   | 665377.0122 | -1.6327   | -1.6432   |
| [815]ENERGY: 130000  | 3202.6548   | 5138.8816   | 5252.4392 | 333.9543  |
| -15459.1582          | -1698.9895  | 0.0000      | 0.0000    | 7407.6073 |
| 4177.3895            | 296.3060    | -3230.2178  | 4236.0669 | 299.6500  |
| 56.8709              | -14.8516    | 671776.5077 | 2.9286    | 2.9160    |
| [851]ENERGY: 140000  | 3085.8142   | 5076.2766   | 5272.1700 | 335.3563  |
| -15394.3227          | -1796.4673  | 0.0000      | 0.0000    | 7419.4002 |
| 3998.2273            | 296.7777    | -3421.1729  | 4060.8329 | 298.0591  |
| 159.9578             | 101.7084    | 684619.4366 | 1.9825    | 1.9630    |
| [901]ENERGY: 150000  | 3111.8361   | 5083.1119   | 5194.7035 | 333.0186  |
| -15333.2478          | -1807.0807  | 0.0000      | 0.0000    | 7503.4813 |
| 4085.8229            | 300.1410    | -3417.6584  | 4147.4784 | 297.8895  |
| -52.3318             | -29.5616    | 700702.1112 | 4.4062    | 4.4006    |
| [937]ENERGY: 160000  | 3130.7430   | 5115.6523   | 5278.8343 | 321.1254  |
| -15377.8524          | -1812.1028  | 0.0000      | 0.0000    | 7395.2483 |
| 4051.6481            | 295.8116    | -3343.6002  | 4107.9063 | 296.5258  |
| 31.8291              | -22.9406    | 717273.6389 | 2.4444    | 2.4440    |
| [987]ENERGY: 170000  | 3058.7526   | 5124.1746   | 5265.0265 | 336.1663  |
| -15400.3537          | -1725.4467  | 0.0000      | 0.0000    | 7484.3084 |
| 4142.6279            | 299.3741    | -3341.6805  | 4203.1832 | 297.4357  |
| -13.0242             | -23.6936    | 733087.6888 | -0.4243   | -0.4048   |
| [1023]ENERGY: 180000 | 3125.6147   | 5082.3773   | 5267.5084 |           |
| 314.0244             | -15325.5238 | -1823.3447  | 0.0000    | 0.0000    |

Supplementary Text 6

|               |             |            |             |           |
|---------------|-------------|------------|-------------|-----------|
| 7431.5927     | 4072.2489   | 297.2654   | -3359.3438  | 4132.3864 |
| 297.9681      | 83.7870     | 3.7261     | 740883.1004 | 0.6615    |
| 0.6711        |             |            |             |           |
| [1073]ENERGY: | 190000      | 3118.9140  | 5050.7932   | 5263.2028 |
| 348.3429      | -15375.2489 | -1761.8486 | 0.0000      | 0.0000    |
| 7512.2367     | 4156.3922   | 300.4912   | -3355.8446  | 4216.1917 |
| 297.0861      | 56.8162     | 67.3044    | 722809.3811 | 3.2182    |
| 3.2120        |             |            |             |           |
| [1112]ENERGY: | 200000      | 3080.3335  | 5033.9149   | 5233.2114 |
| 336.0872      | -15348.5494 | -1798.2025 | 0.0000      | 0.0000    |
| 7492.5896     | 4029.3847   | 299.7053   | -3463.2050  | 4090.8770 |
| 298.6231      | 112.9594    | 84.1613    | 702906.6414 | 4.3992    |
| 4.3810        |             |            |             |           |
| [1162]ENERGY: | 210000      | 3089.8266  | 5110.4777   | 5239.0001 |
| 311.0779      | -15420.6888 | -1768.1098 | 0.0000      | 0.0000    |
| 7431.4155     | 3992.9992   | 297.2583   | -3438.4163  | 4054.4464 |
| 298.5238      | 46.5186     | 60.7693    | 689125.7304 | -0.9311   |
| -0.9430       |             |            |             |           |
| [1198]ENERGY: | 220000      | 3074.2429  | 5041.4207   | 5255.1024 |
| 316.9341      | -15347.5610 | -1718.6998 | 0.0000      | 0.0000    |
| 7529.2702     | 4150.7095   | 301.1725   | -3378.5607  | 4209.1234 |
| 299.4646      | 224.1866    | 194.7159   | 685239.4691 | 5.3086    |
| 5.3269        |             |            |             |           |
| [1248]ENERGY: | 230000      | 3137.3814  | 4989.3466   | 5235.1423 |
| 326.2866      | -15306.5878 | -1862.3171 | 0.0000      | 0.0000    |
| 7382.5812     | 3901.8331   | 295.3049   | -3480.7481  | 3961.5159 |
| 298.2712      | 131.0423    | 38.5305    | 709309.1164 | 1.0928    |
| 1.0767        |             |            |             |           |
| [1284]ENERGY: | 240000      | 3140.2591  | 5170.8556   | 5235.1706 |
| 333.4220      | -15492.2768 | -1731.9710 | 0.0000      | 0.0000    |
| 7425.2765     | 4080.7360   | 297.0128   | -3344.5405  | 4139.1248 |
| 298.8658      | 71.1658     | 49.1631    | 732596.3059 | -0.3714   |
| -0.3433       |             |            |             |           |
| [1334]ENERGY: | 250000      | 3125.4599  | 5118.9266   | 5226.9230 |
| 328.7232      | -15407.3719 | -1774.1848 | 0.0000      | 0.0000    |
| 7545.7005     | 4164.1764   | 301.8298   | -3381.5240  | 4225.3742 |
| 298.0997      | -32.8910    | -8.0237    | 695916.6936 | -0.5836   |
| -0.5843       |             |            |             |           |
| [1370]ENERGY: | 260000      | 3133.2764  | 5045.5796   | 5239.1577 |
| 326.3608      | -15324.1771 | -1869.6407 | 0.0000      | 0.0000    |
| 7408.5020     | 3959.0588   | 296.3418   | -3449.4433  | 4021.7467 |
| 299.4157      | -61.9046    | -101.5359  | 702353.2128 | -0.0716   |
| -0.0793       |             |            |             |           |
| [1420]ENERGY: | 270000      | 3029.6619  | 5008.3538   | 5245.3589 |
| 369.8971      | -15451.0902 | -1777.6385 | 0.0000      | 0.0000    |
| 7374.6956     | 3799.2386   | 294.9895   | -3575.4571  | 3860.5254 |
| 296.7146      | 32.1197     | 28.0131    | 697952.2055 | 2.3330    |
| 2.3323        |             |            |             |           |
| [1456]ENERGY: | 280000      | 3093.3491  | 5071.8494   | 5274.8198 |
| 327.0725      | -15405.6705 | -1828.8256 | 0.0000      | 0.0000    |
| 7516.9480     | 4049.5428   | 300.6796   | -3467.4052  | 4110.4772 |
| 298.2562      | 51.1884     | -24.5381   | 701994.0217 | -3.7611   |
| -3.7694       |             |            |             |           |
| [1506]ENERGY: | 290000      | 3180.1234  | 5189.8434   | 5221.1853 |

Supplementary Text 6

|               |             |            |             |           |
|---------------|-------------|------------|-------------|-----------|
| 352.0418      | -15401.5479 | -1825.6905 | 0.0000      | 0.0000    |
| 7508.2830     | 4224.2385   | 300.3330   | -3284.0445  | 4286.2596 |
| 300.9571      | 91.2755     | 33.3868    | 698064.6628 | 2.6793    |
| 2.6574        |             |            |             |           |
| [1545]ENERGY: | 300000      | 3153.6723  | 5052.9039   | 5224.9574 |
| 338.5462      | -15450.4421 | -1755.0664 | 0.0000      | 0.0000    |
| 7521.6768     | 4086.2482   | 300.8688   | -3435.4286  | 4151.1479 |
| 300.0045      | -1.3354     | 3.2928     | 687814.6668 | -0.2884   |
| -0.2634       |             |            |             |           |
| [1595]ENERGY: | 310000      | 3128.9202  | 5194.0378   | 5247.8622 |
| 329.1210      | -15454.7060 | -1808.6787 | 0.0000      | 0.0000    |
| 7515.2216     | 4151.7783   | 300.6106   | -3363.4434  | 4212.5856 |
| 299.3496      | 58.0041     | 44.3335    | 675003.2078 | 3.9818    |
| 3.9646        |             |            |             |           |
| [1631]ENERGY: | 320000      | 3191.8297  | 5072.2861   | 5309.0604 |
| 322.9730      | -15474.3037 | -1724.8493 | 0.0000      | 0.0000    |
| 7396.0688     | 4093.0649   | 295.8445   | -3303.0039  | 4152.2915 |
| 301.6515      | 36.2039     | -10.0398   | 661515.3969 | -0.9377   |
| -0.9499       |             |            |             |           |
| [1681]ENERGY: | 330000      | 3188.1577  | 5142.1591   | 5220.0213 |
| 330.6006      | -15448.3503 | -1746.4110 | 0.0000      | 0.0000    |
| 7405.6963     | 4091.8737   | 296.2296   | -3313.8226  | 4151.8937 |
| 298.0389      | 5.3475      | -100.1743  | 671585.1337 | 4.1113    |
| 4.1347        |             |            |             |           |
| [1717]ENERGY: | 340000      | 3107.7792  | 5034.0935   | 5263.9061 |
| 339.0191      | -15382.0802 | -1771.9517 | 0.0000      | 0.0000    |
| 7481.1202     | 4071.8863   | 299.2465   | -3409.2339  | 4131.3843 |
| 298.5296      | 90.7662     | 51.4247    | 671626.4256 | 1.0178    |
| 1.0321        |             |            |             |           |
| [1767]ENERGY: | 350000      | 3196.6530  | 5083.8554   | 5203.3836 |
| 345.5323      | -15417.8760 | -1788.1398 | 0.0000      | 0.0000    |
| 7394.0026     | 4017.4111   | 295.7618   | -3376.5915  | 4073.0743 |
| 298.9525      | -64.2600    | -84.0474   | 673934.2969 | -1.2356   |
| -1.2541       |             |            |             |           |
| [1803]ENERGY: | 360000      | 3135.6357  | 5064.8411   | 5258.4824 |
| 331.4628      | -15384.1400 | -1756.6055 | 0.0000      | 0.0000    |
| 7437.0930     | 4086.7695   | 297.4854   | -3350.3235  | 4145.6040 |
| 300.0044      | -52.7826    | -66.1945   | 645732.6009 | -0.3870   |
| -0.3815       |             |            |             |           |
| [1853]ENERGY: | 370000      | 3091.8282  | 5096.0485   | 5253.2554 |
| 348.4179      | -15444.4315 | -1768.3599 | 0.0000      | 0.0000    |
| 7468.8392     | 4045.5978   | 298.7553   | -3423.2415  | 4108.6778 |
| 297.7511      | 98.3014     | -17.5770   | 638783.4087 | -5.1491   |
| -5.1625       |             |            |             |           |
| [1889]ENERGY: | 380000      | 3198.6707  | 5006.3495   | 5239.2580 |
| 313.1935      | -15388.0393 | -1831.6789 | 0.0000      | 0.0000    |
| 7591.7990     | 4129.5524   | 303.6737   | -3462.2465  | 4191.7022 |
| 298.0483      | -48.0668    | -57.5298   | 652389.9513 | -0.6791   |
| -0.6615       |             |            |             |           |
| [1939]ENERGY: | 390000      | 3128.8689  | 5147.8211   | 5259.6669 |
| 318.3621      | -15581.7435 | -1787.0239 | 0.0000      | 0.0000    |
| 7395.8570     | 3881.8085   | 295.8360   | -3514.0485  | 3942.0817 |
| 299.1600      | -142.3356   | -94.9207   | 686284.3115 | 1.5374    |
| 1.5360        |             |            |             |           |

## Supplementary Text 6

|               |             |            |             |           |
|---------------|-------------|------------|-------------|-----------|
| [1978]ENERGY: | 400000      | 3121.1737  | 5141.9525   | 5237.8007 |
| 341.7890      | -15493.6921 | -1747.4277 | 0.0000      | 0.0000    |
| 7368.9459     | 3970.5422   | 294.7595   | -3398.4037  | 4029.6973 |
| 298.9845      | 25.4521     | 28.8310    | 705941.6149 | 3.5616    |
| 3.5573        |             |            |             |           |
| [2028]ENERGY: | 410000      | 3142.2449  | 5044.7495   | 5244.1139 |
| 321.6315      | -15396.8693 | -1736.1777 | 0.0000      | 0.0000    |
| 7612.2967     | 4231.9896   | 304.4936   | -3380.3071  | 4296.8475 |
| 299.1721      | -18.1874    | -108.3123  | 679499.8009 | -0.5217   |
| -0.5209       |             |            |             |           |
| [2064]ENERGY: | 420000      | 3216.8908  | 5130.8109   | 5290.4419 |
| 321.6035      | -15498.0018 | -1733.2487 | 0.0000      | 0.0000    |
| 7488.2068     | 4216.7034   | 299.5300   | -3271.5034  | 4278.5936 |
| 300.7439      | -139.4307   | -177.5957  | 680666.3954 | -1.0010   |
| -1.0069       |             |            |             |           |
| [2114]ENERGY: | 430000      | 3121.0415  | 5164.8624   | 5265.1284 |
| 332.6614      | -15579.2907 | -1724.8834 | 0.0000      | 0.0000    |
| 7515.0701     | 4094.5898   | 300.6045   | -3420.4803  | 4155.0956 |
| 300.3176      | 27.2165     | 64.1419    | 667615.0500 | 5.4422    |
| 5.4634        |             |            |             |           |
| [2150]ENERGY: | 440000      | 3092.0472  | 5183.9058   | 5198.9928 |
| 330.7777      | -15535.6322 | -1732.6821 | 0.0000      | 0.0000    |
| 7426.2896     | 3963.6987   | 297.0533   | -3462.5909  | 4024.8097 |
| 299.5429      | 47.6377     | -8.5732    | 674988.9697 | -1.6516   |
| -1.6698       |             |            |             |           |
| [2200]ENERGY: | 450000      | 3077.3846  | 5092.2759   | 5267.3630 |
| 321.1853      | -15492.0090 | -1804.4830 | 0.0000      | 0.0000    |
| 7453.5859     | 3915.3028   | 298.1451   | -3538.2831  | 3977.8881 |
| 297.9475      | -5.2406     | -53.3322   | 658647.5438 | 0.2443    |
| 0.2519        |             |            |             |           |
| [2236]ENERGY: | 460000      | 3133.7603  | 5018.5541   | 5289.9176 |
| 316.7362      | -15472.1638 | -1740.7415 | 0.0000      | 0.0000    |
| 7427.2223     | 3973.2852   | 297.0906   | -3453.9371  | 4030.1727 |
| 299.0902      | 13.3217     | -62.7911   | 674876.2122 | 1.3911    |
| 1.4016        |             |            |             |           |
| [2286]ENERGY: | 470000      | 3127.4913  | 4992.2781   | 5201.0203 |
| 309.6305      | -15466.0376 | -1726.5359 | 0.0000      | 0.0000    |
| 7374.8192     | 3812.6660   | 294.9945   | -3562.1532  | 3873.8736 |
| 298.9193      | 105.6638    | 96.6128    | 673444.7289 | 5.0763    |
| 5.0788        |             |            |             |           |
| [2322]ENERGY: | 480000      | 3036.5908  | 5115.9841   | 5217.8342 |
| 313.4169      | -15567.1400 | -1665.2517 | 0.0000      | 0.0000    |
| 7488.7517     | 3940.1861   | 299.5518   | -3548.5657  | 4001.5793 |
| 297.5428      | 199.3978    | 96.8170    | 673403.7469 | 2.0426    |
| 2.0107        |             |            |             |           |
| [2372]ENERGY: | 490000      | 3074.1220  | 5148.1432   | 5240.8117 |
| 333.3690      | -15618.8598 | -1711.9101 | 0.0000      | 0.0000    |
| 7516.0583     | 3981.7343   | 300.6441   | -3534.3240  | 4044.2000 |
| 298.1546      | -40.3821    | -32.6725   | 681281.5782 | 1.2225    |
| 1.2551        |             |            |             |           |
| [2411]ENERGY: | 500000      | 3097.6311  | 4922.4368   | 5213.7887 |
| 329.8594      | -15453.6425 | -1798.3853 | 0.0000      | 0.0000    |
| 7469.8322     | 3781.5204   | 298.7950   | -3688.3119  | 3839.3250 |
| 298.4082      | -28.0602    | -16.0500   | 688492.8974 | 0.1499    |

Supplementary Text 6

0.1439  
 [2461]ENERGY: 510000 3083.0804 5012.2147 5229.6451  
 307.1805 -15452.2272 -1735.2215 0.0000 0.0000  
 7376.4206 3821.0925 295.0585 -3555.3281 3878.9534  
 297.1383 101.6399 94.9606 688405.5946 2.9463  
 2.9756  
 [2497]ENERGY: 520000 3068.9549 5124.1922 5224.8445  
 335.1759 -15577.0118 -1785.5000 0.0000 0.0000  
 7415.5809 3806.2366 296.6249 -3609.3443 3866.3422  
 297.4389 100.6106 44.0728 694027.3584 3.6587  
 3.6335  
 [2547]ENERGY: 530000 3061.9368 5019.8254 5254.1827  
 326.8375 -15434.7492 -1807.2652 0.0000 0.0000  
 7441.6178 3862.3858 297.6664 -3579.2319 3920.7241  
 297.1332 56.6951 54.0381 727824.8496 -5.1175  
 -5.1007  
 [2583]ENERGY: 540000 3194.2206 5090.9538 5272.8668  
 333.1087 -15515.4852 -1782.5055 0.0000 0.0000  
 7632.1911 4225.3503 305.2894 -3406.8408 4290.6255  
 301.0082 -38.4270 -0.6722 709960.0054 2.2609  
 2.2506  
 [2633]ENERGY: 550000 3132.9713 4994.0708 5317.8419  
 335.4273 -15495.3285 -1805.4549 0.0000 0.0000  
 7424.1332 3903.6611 296.9670 -3520.4721 3969.6982  
 300.0941 -127.8158 -117.9040 698332.9392 0.2879  
 0.2845  
 [2669]ENERGY: 560000 3221.2659 5099.6914 5243.8712  
 326.3126 -15433.6642 -1877.9119 0.0000 0.0000  
 7461.3530 4040.9180 298.4558 -3420.4350 4098.7261  
 298.8873 -35.9170 -81.4857 695842.3292 0.1598  
 0.1422  
 [2719]ENERGY: 570000 3060.1780 5159.7786 5248.4677  
 346.1091 -15516.2960 -1805.7228 0.0000 0.0000  
 7346.1233 3838.6380 293.8466 -3507.4853 3898.8865  
 300.3268 72.3303 72.5222 686379.1208 -0.4547  
 -0.4636  
 [2755]ENERGY: 580000 3140.3712 5090.5282 5285.9250  
 320.6720 -15555.7305 -1807.5421 0.0000 0.0000  
 7457.2172 3931.4411 298.2904 -3525.7761 3990.7002  
 297.4480 -80.0786 -48.5354 702888.1075 -4.1345  
 -4.1205  
 [2805]ENERGY: 590000 3072.7276 5144.5042 5269.4252  
 338.4690 -15552.6688 -1757.2563 0.0000 0.0000  
 7485.6410 4000.8419 299.4274 -3484.7991 4061.9260  
 297.3207 41.2457 -38.4816 694238.8761 4.7380  
 4.7319  
 [2844]ENERGY: 600000 3134.1521 5099.2271 5260.4997  
 354.6530 -15569.6431 -1785.8289 0.0000 0.0000  
 7444.7570 3937.8169 297.7920 -3506.9401 4000.7552  
 299.5258 -62.8926 -72.2141 682707.5143 -0.1467  
 -0.1464  
 [2894]ENERGY: 610000 3145.1552 5080.5676 5310.3160  
 326.3685 -15596.2202 -1801.5025 0.0000 0.0000  
 7361.9771 3826.6616 294.4808 -3535.3155 3887.0152

Supplementary Text 6

|               |             |            |             |           |
|---------------|-------------|------------|-------------|-----------|
| 299.3837      | -65.7452    | -31.4421   | 686235.4425 | -1.4283   |
| -1.4276       |             |            |             |           |
| [2930]ENERGY: | 620000      | 3164.7786  | 5143.6284   | 5291.1578 |
| 316.4663      | -15638.2498 | -1724.2813 | 0.0000      | 0.0000    |
| 7444.6669     | 3998.1669   | 297.7884   | -3446.5000  | 4054.7716 |
| 297.9952      | -1.9774     | 79.8357    | 693794.7112 | 1.7361    |
| 1.7609        |             |            |             |           |
| [2980]ENERGY: | 630000      | 3119.3063  | 5214.7017   | 5266.5190 |
| 311.5646      | -15569.0838 | -1820.3797 | 0.0000      | 0.0000    |
| 7394.5355     | 3917.1635   | 295.7831   | -3477.3720  | 3980.4682 |
| 299.6749      | 46.0007     | -8.5482    | 710997.0600 | -0.6284   |
| -0.6517       |             |            |             |           |
| [3016]ENERGY: | 640000      | 3174.7675  | 5031.1634   | 5271.0624 |
| 318.9766      | -15585.7465 | -1737.1738 | 0.0000      | 0.0000    |
| 7409.8712     | 3882.9207   | 296.3965   | -3526.9504  | 3942.5428 |
| 298.7167      | 116.9771    | 61.2754    | 698601.6393 | -1.3210   |
| -1.3145       |             |            |             |           |
| [3066]ENERGY: | 650000      | 3177.0533  | 5132.7307   | 5286.5408 |
| 340.8901      | -15503.2876 | -1789.6163 | 0.0000      | 0.0000    |
| 7430.2905     | 4074.6015   | 297.2133   | -3355.6890  | 4134.1177 |
| 298.6829      | -6.0652     | -51.3619   | 684283.4684 | -1.4557   |
| -1.4616       |             |            |             |           |
| [3102]ENERGY: | 660000      | 3157.3254  | 5104.2407   | 5296.4471 |
| 340.7365      | -15562.8822 | -1724.5104 | 0.0000      | 0.0000    |
| 7467.1329     | 4078.4900   | 298.6870   | -3388.6430  | 4135.9954 |
| 300.3581      | 92.1610     | 30.8259    | 683870.1097 | 1.9933    |
| 2.0015        |             |            |             |           |
| [3152]ENERGY: | 670000      | 3089.3575  | 5114.8798   | 5281.5975 |
| 331.4598      | -15559.5396 | -1728.7316 | 0.0000      | 0.0000    |
| 7445.9934     | 3975.0167   | 297.8414   | -3470.9767  | 4037.3958 |
| 299.3014      | 87.5926     | -22.6748   | 687287.8922 | -0.0462   |
| -0.0598       |             |            |             |           |
| [3188]ENERGY: | 680000      | 3085.1129  | 4969.3597   | 5249.2296 |
| 317.5620      | -15570.1568 | -1759.7263 | 0.0000      | 0.0000    |
| 7377.4651     | 3668.8463   | 295.1003   | -3708.6189  | 3731.8391 |
| 297.6035      | -75.7937    | -43.8626   | 666151.5232 | 4.1600    |
| 4.1813        |             |            |             |           |
| [3238]ENERGY: | 690000      | 3102.9781  | 5040.9401   | 5256.1336 |
| 344.0963      | -15601.4491 | -1781.1087 | 0.0000      | 0.0000    |
| 7420.0614     | 3781.6516   | 296.8042   | -3638.4097  | 3844.6507 |
| 296.9483      | -170.7987   | -55.8693   | 663287.8371 | 0.2688    |
| 0.2735        |             |            |             |           |
| [3277]ENERGY: | 700000      | 3118.9327  | 5052.0453   | 5258.5682 |
| 325.2747      | -15600.4720 | -1800.9939 | 0.0000      | 0.0000    |
| 7469.3541     | 3822.7092   | 298.7759   | -3646.6449  | 3881.4868 |
| 298.6444      | -29.7427    | -90.9349   | 653356.5542 | 1.5502    |
| 1.5562        |             |            |             |           |
| [3327]ENERGY: | 710000      | 3179.5555  | 5070.6584   | 5272.9611 |
| 359.1280      | -15511.5614 | -1754.4067 | 0.0000      | 0.0000    |
| 7393.8983     | 4010.2332   | 295.7576   | -3383.6651  | 4067.2059 |
| 296.1479      | -71.1332    | -86.9386   | 626891.9138 | -0.3440   |
| -0.3508       |             |            |             |           |
| [3363]ENERGY: | 720000      | 3103.1979  | 5079.5094   | 5250.9275 |
| 343.0918      | -15637.0600 | -1737.8415 | 0.0000      | 0.0000    |



## Supplementary Text 6

|               |             |            |             |           |
|---------------|-------------|------------|-------------|-----------|
| 7506.3051     | 3908.1301   | 300.2539   | -3598.1750  | 3972.1141 |
| 298.9742      | 109.9135    | 78.9654    | 618407.9429 | -2.6763   |
| -2.6934       |             |            |             |           |
| [3413]ENERGY: | 730000      | 3132.0804  | 5136.5958   | 5322.1565 |
| 313.3612      | -15625.6487 | -1745.6477 | 0.0000      | 0.0000    |
| 7298.1017     | 3830.9992   | 291.9257   | -3467.1025  | 3885.7272 |
| 298.4104      | 203.9190    | 157.9265   | 641397.5686 | 7.1437    |
| 7.1609        |             |            |             |           |
| [3449]ENERGY: | 740000      | 3103.4202  | 5059.2642   | 5267.9758 |
| 322.4721      | -15678.5302 | -1805.5239 | 0.0000      | 0.0000    |
| 7448.7751     | 3717.8533   | 297.9527   | -3730.9218  | 3779.3021 |
| 297.9642      | 28.8116     | 53.9967    | 621221.5827 | -0.9396   |
| -0.9131       |             |            |             |           |
| [3499]ENERGY: | 750000      | 3184.4887  | 5157.9876   | 5250.2888 |
| 354.1707      | -15667.1871 | -1738.8487 | 0.0000      | 0.0000    |
| 7462.1009     | 4003.0008   | 298.4858   | -3459.1001  | 4062.8674 |
| 298.8223      | -23.9161    | -149.1651  | 598798.9646 | 5.1931    |
| 5.2049        |             |            |             |           |
| [3535]ENERGY: | 760000      | 3074.9927  | 5143.0871   | 5199.2593 |
| 335.9872      | -15548.8272 | -1796.6240 | 0.0000      | 0.0000    |
| 7466.5369     | 3874.4120   | 298.6632   | -3592.1249  | 3939.5927 |
| 299.4873      | -73.5628    | -20.6852   | 587003.6180 | -1.4957   |
| -1.5196       |             |            |             |           |
| [3585]ENERGY: | 770000      | 3021.5819  | 5088.0804   | 5238.2836 |
| 347.2035      | -15562.3278 | -1778.8406 | 0.0000      | 0.0000    |
| 7437.2795     | 3791.2605   | 297.4929   | -3646.0191  | 3850.0204 |
| 298.2558      | 56.3357     | 32.1641    | 588565.3355 | 0.2428    |
| 0.2504        |             |            |             |           |
| [3621]ENERGY: | 780000      | 3128.7049  | 5044.5780   | 5221.2300 |
| 335.0084      | -15462.5257 | -1787.9726 | 0.0000      | 0.0000    |
| 7366.8157     | 3845.8388   | 294.6743   | -3520.9769  | 3902.0810 |
| 297.4929      | -34.0066    | -69.9849   | 572471.9140 | 3.6503    |
| 3.6510        |             |            |             |           |
| [3671]ENERGY: | 790000      | 3158.9555  | 5138.7105   | 5231.9086 |
| 342.1291      | -15689.9207 | -1718.4646 | 0.0000      | 0.0000    |
| 7585.0219     | 4048.3401   | 303.4026   | -3536.6817  | 4115.8385 |
| 301.1857      | -118.1325   | -107.7669  | 581207.2866 | 2.0623    |
| 2.0862        |             |            |             |           |
| [3710]ENERGY: | 800000      | 3109.3253  | 5117.0824   | 5263.7548 |
| 320.5087      | -15700.9071 | -1714.9292 | 0.0000      | 0.0000    |
| 7541.5991     | 3936.4339   | 301.6657   | -3605.1652  | 4006.9187 |
| 301.4937      | -105.0339   | -76.2315   | 576041.9977 | 2.6303    |
| 2.6237        |             |            |             |           |
| [3760]ENERGY: | 810000      | 3145.3001  | 5037.6537   | 5278.2738 |
| 325.0220      | -15582.5449 | -1805.6051 | 0.0000      | 0.0000    |
| 7507.0316     | 3905.1313   | 300.2830   | -3601.9004  | 3966.4459 |
| 298.1440      | -129.7316   | -166.0159  | 572015.2389 | 2.1397    |
| 2.1465        |             |            |             |           |
| [3796]ENERGY: | 820000      | 3118.0676  | 5152.6129   | 5287.9136 |
| 334.9788      | -15675.6172 | -1774.5878 | 0.0000      | 0.0000    |
| 7440.2699     | 3883.6377   | 297.6125   | -3556.6322  | 3944.1103 |
| 298.2845      | -188.0620   | -176.5159  | 579804.4380 | -1.7902   |
| -1.8076       |             |            |             |           |
| [3846]ENERGY: | 830000      | 3119.2520  | 5153.5045   | 5235.6748 |

## Supplementary Text 6

|               |             |            |             |           |
|---------------|-------------|------------|-------------|-----------|
| 333.9058      | -15612.9916 | -1806.6763 | 0.0000      | 0.0000    |
| 7440.1258     | 3862.7950   | 297.6067   | -3577.3308  | 3925.6701 |
| 299.1036      | -6.6282     | 12.1214    | 590742.1042 | -1.6203   |
| -1.6360       |             |            |             |           |
| [3882]ENERGY: | 840000      | 3111.9001  | 5053.6886   | 5213.5331 |
| 331.3233      | -15673.4079 | -1725.3709 | 0.0000      | 0.0000    |
| 7395.3912     | 3707.0575   | 295.8173   | -3688.3337  | 3766.2147 |
| 299.1782      | -123.6952   | -144.5526  | 599607.0270 | 1.9048    |
| 1.9083        |             |            |             |           |
| [3932]ENERGY: | 850000      | 3099.8319  | 5159.0361   | 5207.0059 |
| 351.5159      | -15628.1456 | -1697.1629 | 0.0000      | 0.0000    |
| 7562.6466     | 4054.7279   | 302.5076   | -3507.9187  | 4112.5872 |
| 299.9441      | -36.7523    | -53.3497   | 608231.2720 | 1.1001    |
| 1.0939        |             |            |             |           |
| [3968]ENERGY: | 860000      | 3165.5765  | 5130.1721   | 5253.6396 |
| 318.5936      | -15637.4389 | -1780.3599 | 0.0000      | 0.0000    |
| 7587.1571     | 4037.3401   | 303.4880   | -3549.8170  | 4103.3866 |
| 300.7874      | -126.3864   | -112.2356  | 635059.3687 | 1.6425    |
| 1.6777        |             |            |             |           |
| [4018]ENERGY: | 870000      | 3085.6251  | 5046.5693   | 5282.4229 |
| 349.3944      | -15734.1253 | -1710.6595 | 0.0000      | 0.0000    |
| 7503.9812     | 3823.2080   | 300.1610   | -3680.7732  | 3884.5757 |
| 299.5773      | -59.0729    | -59.4872   | 638560.8523 | 4.6718    |
| 4.6641        |             |            |             |           |
| [4054]ENERGY: | 880000      | 3204.2029  | 5106.6024   | 5276.2232 |
| 362.3494      | -15672.3741 | -1785.8709 | 0.0000      | 0.0000    |
| 7412.8624     | 3903.9953   | 296.5162   | -3508.8671  | 3965.1868 |
| 298.3971      | 20.1930     | 6.2761     | 648394.6854 | -1.0150   |
| -0.9885       |             |            |             |           |
| [4104]ENERGY: | 890000      | 3129.0806  | 5123.6061   | 5287.3198 |
| 337.2269      | -15675.5439 | -1759.9174 | 0.0000      | 0.0000    |
| 7459.5184     | 3901.2904   | 298.3824   | -3558.2280  | 3964.2316 |
| 300.2189      | 56.6201     | 80.3820    | 657940.7285 | 0.7625    |
| 0.7611        |             |            |             |           |
| [4143]ENERGY: | 900000      | 3157.3628  | 5104.1606   | 5278.8508 |
| 315.6052      | -15668.6179 | -1702.2780 | 0.0000      | 0.0000    |
| 7492.6129     | 3977.6964   | 299.7062   | -3514.9165  | 4040.7213 |
| 298.7781      | 131.0939    | 95.4240    | 668517.9627 | -0.2763   |
| -0.2766       |             |            |             |           |
| [4193]ENERGY: | 910000      | 3052.3556  | 5048.3192   | 5210.3962 |
| 338.0524      | -15609.0228 | -1699.7287 | 0.0000      | 0.0000    |
| 7435.1625     | 3775.5345   | 297.4082   | -3659.6280  | 3839.5701 |
| 299.3335      | 57.2086     | 141.0280   | 649747.5354 | 4.0159    |
| 4.0167        |             |            |             |           |
| [4229]ENERGY: | 920000      | 3139.6230  | 5147.5743   | 5196.5671 |
| 312.7321      | -15648.5065 | -1748.2678 | 0.0000      | 0.0000    |
| 7433.0229     | 3832.7451   | 297.3226   | -3600.2779  | 3890.6953 |
| 298.0999      | -53.8105    | -25.9730   | 657553.5451 | 1.6576    |
| 1.6467        |             |            |             |           |
| [4279]ENERGY: | 930000      | 3105.2252  | 5180.2862   | 5231.3569 |
| 316.9823      | -15718.0245 | -1737.9304 | 0.0000      | 0.0000    |
| 7387.6688     | 3765.5644   | 295.5084   | -3622.1044  | 3823.9493 |
| 297.2416      | -106.1315   | -60.2365   | 679305.0425 | -0.8180   |
| -0.8152       |             |            |             |           |

Supplementary Text 6

|               |             |             |             |             |           |
|---------------|-------------|-------------|-------------|-------------|-----------|
| [4315]ENERGY: | 940000      | 3231.9699   | 5064.2342   | 5258.6796   |           |
|               | 317.6068    | -15714.4221 | -1779.4844  | 0.0000      | 0.0000    |
|               | 7435.3571   | 3813.9411   | 297.4160    | -3621.4160  | 3870.8461 |
|               | 298.1927    | -82.0115    | -110.4575   | 694607.3580 | 0.7375    |
|               | 0.7214      |             |             |             |           |
| [4365]ENERGY: | 950000      | 3058.7383   | 5072.9182   | 5269.7776   |           |
|               | 338.2606    | -15512.1562 | -1787.9044  | 0.0000      | 0.0000    |
|               | 7492.3472   | 3931.9813   | 299.6956    | -3560.3659  | 3991.6569 |
|               | 299.2385    | 98.9738     | 89.9541     | 701291.3609 | 0.7675    |
|               | 0.7420      |             |             |             |           |
| [4401]ENERGY: | 960000      | 3106.5409   | 4963.9316   | 5244.8190   |           |
|               | 327.5458    | -15610.0498 | -1729.4746  | 0.0000      | 0.0000    |
|               | 7408.9043   | 3712.2173   | 296.3579    | -3696.6870  | 3773.4159 |
|               | 298.1141    | 38.7373     | 89.3275     | 680065.9889 | -2.7848   |
|               | -2.7673     |             |             |             |           |
| [4451]ENERGY: | 970000      | 3163.8488   | 4989.5316   | 5221.6318   |           |
|               | 300.8973    | -15611.3858 | -1789.9242  | 0.0000      | 0.0000    |
|               | 7566.1797   | 3840.7791   | 302.6489    | -3725.4006  | 3902.5568 |
|               | 297.0335    | 131.2596    | 83.1796     | 652764.0069 | 1.5058    |
|               | 1.4911      |             |             |             |           |
| [4487]ENERGY: | 980000      | 3134.8613   | 5148.7357   | 5249.8069   |           |
|               | 329.9036    | -15690.6120 | -1759.7066  | 0.0000      | 0.0000    |
|               | 7411.2375   | 3824.2263   | 296.4512    | -3587.0111  | 3883.6367 |
|               | 297.8708    | -24.9599    | -20.3240    | 665697.6024 | -0.2226   |
|               | -0.2105     |             |             |             |           |
| [4537]ENERGY: | 990000      | 3138.3679   | 5141.0050   | 5228.5475   |           |
|               | 312.6811    | -15659.4855 | -1749.3609  | 0.0000      | 0.0000    |
|               | 7435.1838   | 3846.9388   | 297.4091    | -3588.2450  | 3907.4947 |
|               | 298.2929    | -21.6855    | -50.1959    | 663143.5011 | -0.5846   |
|               | -0.5865     |             |             |             |           |
| [4576]ENERGY: | 1000000     | 3141.4388   | 5130.6049   | 5277.5644   |           |
|               | 330.6152    | -15760.7694 | -1711.3107  | 0.0000      | 0.0000    |
|               | 7516.9058   | 3925.0491   | 300.6780    | -3591.8567  | 3985.9368 |
|               | 299.2967    | 29.1699     | 54.3248     | 656151.2420 | -1.2910   |
|               | -1.2907     |             |             |             |           |
| [269]ENERGY:  | 1010000     | 3118.5446   | 5075.5672   | 5274.7883   | 331.3344  |
|               | -15628.8916 | -1715.9387  | 0.0000      | 0.0000      | 7474.5614 |
|               | 3929.9656   | 299.0198    | -3544.5958  | 3988.2025   | 300.1142  |
|               | -10.1897    | -5.1528     | 656151.2420 | 0.1777      | 0.1687    |
| [308]ENERGY:  | 1020000     | 3193.0267   | 5076.9738   | 5268.0610   | 348.6188  |
|               | -15710.1920 | -1727.6348  | 0.0000      | 0.0000      | 7481.2238 |
|               | 3930.0772   | 299.2864    | -3551.1466  | 3988.2718   | 300.1884  |
|               | 118.9233    | 80.6427     | 656151.2420 | -0.1369     | -0.1333   |
| [360]ENERGY:  | 1030000     | 3092.3392   | 5039.1446   | 5261.4103   | 309.6746  |
|               | -15639.6431 | -1660.4838  | 0.0000      | 0.0000      | 7523.7115 |
|               | 3926.1534   | 300.9861    | -3597.5581  | 3987.3758   | 300.1528  |
|               | -50.7301    | -68.5227    | 656151.2420 | -1.4696     | -1.4777   |
| [398]ENERGY:  | 1040000     | 3171.7749   | 5107.0066   | 5315.3158   | 338.0733  |
|               | -15753.6268 | -1767.8602  | 0.0000      | 0.0000      | 7516.2281 |
|               | 3926.9116   | 300.6867    | -3589.3164  | 3989.0822   | 300.2051  |
|               | 87.9361     | 29.3912     | 656151.2420 | 1.8201      | 1.8264    |
| [450]ENERGY:  | 1050000     | 3132.5272   | 5105.9343   | 5239.9259   | 323.8519  |
|               | -15669.6168 | -1764.5640  | 0.0000      | 0.0000      | 7561.5842 |
|               | 3929.6428   | 302.5012    | -3631.9414  | 3989.5633   | 300.3358  |

## Supplementary Text 6

|               |             |             |             |             |           |
|---------------|-------------|-------------|-------------|-------------|-----------|
|               | 48.2273     | 3.8100      | 656151.2420 | -1.3954     | -1.4103   |
| [488]ENERGY:  | 1060000     | 3185.0776   | 5113.0898   | 5236.5396   | 328.9191  |
|               | -15630.3543 | -1745.4366  | 0.0000      | 0.0000      | 7444.0451 |
|               | 3931.8803   | 297.7990    | -3512.1648  | 3989.3764   | 300.4848  |
|               | 2.0938      | -44.0894    | 656151.2420 | 2.5044      | 2.5229    |
| [539]ENERGY:  | 1070000     | 3045.6216   | 5033.6439   | 5238.9268   | 331.4349  |
|               | -15573.8816 | -1742.9768  | 0.0000      | 0.0000      | 7594.0880 |
|               | 3926.8567   | 303.8015    | -3667.2313  | 3989.0907   | 300.4605  |
|               | -31.6628    | 42.5827     | 656151.2420 | -2.3652     | -2.3540   |
| [576]ENERGY:  | 1080000     | 3164.3185   | 5047.0736   | 5228.5049   | 311.9635  |
|               | -15627.3653 | -1712.0613  | 0.0000      | 0.0000      | 7519.7121 |
|               | 3932.1459   | 300.8261    | -3587.5662  | 3991.2400   | 300.4826  |
|               | 106.0794    | 2.4271      | 656151.2420 | 0.8860      | 0.8805    |
| [627]ENERGY:  | 1090000     | 3104.9405   | 5167.5023   | 5250.0484   | 334.7215  |
|               | -15629.5037 | -1842.9717  | 0.0000      | 0.0000      | 7541.8912 |
|               | 3926.6285   | 301.7134    | -3615.2627  | 3990.6706   | 300.4734  |
|               | 101.3561    | 43.0360     | 656151.2420 | 1.1652      | 1.1421    |
| [667]ENERGY:  | 1100000     | 3124.2040   | 5181.2254   | 5223.8442   | 356.3144  |
|               | -15661.1873 | -1784.1089  | 0.0000      | 0.0000      | 7490.8892 |
|               | 3931.1810   | 299.6730    | -3559.7082  | 3991.3821   | 300.3982  |
|               | 8.3877      | 21.8072     | 656151.2420 | -0.3465     | -0.3270   |
| [718]ENERGY:  | 1110000     | 3157.6805   | 5145.9613   | 5265.9942   | 312.5239  |
|               | -15587.1714 | -1813.6826  | 0.0000      | 0.0000      | 7448.6271 |
|               | 3929.9330   | 297.9823    | -3518.6941  | 3992.5651   | 300.4745  |
|               | -92.8301    | -129.0754   | 656151.2420 | 0.8505      | 0.8431    |
| [754]ENERGY:  | 1120000     | 3160.4423   | 5069.0065   | 5285.0351   | 354.2103  |
|               | -15682.9936 | -1713.4202  | 0.0000      | 0.0000      | 7462.1708 |
|               | 3934.4513   | 298.5241    | -3527.7195  | 3991.4907   | 300.4934  |
|               | 19.9002     | 27.9187     | 656151.2420 | -0.7996     | -0.7943   |
| [804]ENERGY:  | 1130000     | 3209.3782   | 5130.7589   | 5280.7692   | 330.8008  |
|               | -15768.0905 | -1759.7389  | 0.0000      | 0.0000      | 7502.5226 |
|               | 3926.4003   | 300.1384    | -3576.1223  | 3992.9218   | 300.6672  |
|               | 0.1463      | -16.2160    | 656151.2420 | 1.4995      | 1.5130    |
| [840]ENERGY:  | 1140000     | 3187.2797   | 5207.6356   | 5245.4209   | 328.0342  |
|               | -15756.5004 | -1764.0744  | 0.0000      | 0.0000      | 7482.4012 |
|               | 3930.1967   | 299.3335    | -3552.2045  | 3992.2482   | 300.7003  |
|               | -185.8115   | -163.1702   | 656151.2420 | -1.0098     | -1.0242   |
| [890]ENERGY:  | 1150000     | 3125.9820   | 5123.8735   | 5247.6602   | 344.8588  |
|               | -15707.2332 | -1792.0783  | 0.0000      | 0.0000      | 7588.1585 |
|               | 3931.2214   | 303.5643    | -3656.9370  | 3992.8840   | 300.5328  |
|               | -4.5459     | -60.0908    | 656151.2420 | -1.5687     | -1.5701   |
| [926]ENERGY:  | 1160000     | 3108.8290   | 5240.8077   | 5303.3476   | 306.9555  |
|               | -15732.9059 | -1743.1260  | 0.0000      | 0.0000      | 7449.5409 |
|               | 3933.4487   | 298.0189    | -3516.0922  | 3992.8152   | 300.8292  |
|               | 15.7935     | 14.0724     | 656151.2420 | 1.4967      | 1.4997    |
| [976]ENERGY:  | 1170000     | 3203.4710   | 5195.1639   | 5293.9336   | 327.0240  |
|               | -15705.3408 | -1806.6793  | 0.0000      | 0.0000      | 7423.7038 |
|               | 3931.2762   | 296.9853    | -3492.4276  | 3991.6024   | 300.8024  |
|               | -9.6948     | 9.2784      | 656151.2420 | -2.6899     | -2.6825   |
| [1012]ENERGY: | 1180000     | 3166.6177   | 5126.8889   | 5251.6964   |           |
|               | 330.0288    | -15663.0329 | -1736.3078  | 0.0000      | 0.0000    |
|               | 7458.3151   | 3934.2063   | 298.3699    | -3524.1088  | 3991.6520 |
|               | 300.7396    | -152.3701   | -104.6227   | 656151.2420 | 2.6984    |
|               | 2.6953      |             |             |             |           |

## Supplementary Text 6

|                       |             |            |             |           |
|-----------------------|-------------|------------|-------------|-----------|
| [1062]ENERGY: 1190000 | 3187.7277   | 5087.8116  | 5274.2794   |           |
| 325.7112              | -15700.5926 | -1768.8652 | 0.0000      | 0.0000    |
| 7527.4005             | 3933.4725   | 301.1337   | -3593.9280  | 3991.6251 |
| 300.6332              | -53.2105    | -60.0923   | 656151.2420 | -0.6512   |
| -0.6597               |             |            |             |           |
| [1101]ENERGY: 1200000 | 3124.8917   | 5054.6546  | 5303.5005   |           |
| 335.5070              | -15633.0663 | -1781.3133 | 0.0000      | 0.0000    |
| 7527.0394             | 3931.2136   | 301.1192   | -3595.8259  | 3991.2501 |
| 300.8150              | 43.8428     | -14.1783   | 656151.2420 | -0.7250   |
| -0.7247               |             |            |             |           |
| [1151]ENERGY: 1210000 | 3069.2737   | 5137.9784  | 5250.0484   |           |
| 344.6018              | -15685.6980 | -1725.5376 | 0.0000      | 0.0000    |
| 7539.2963             | 3929.9630   | 301.6095   | -3609.3333  | 3992.1413 |
| 300.8082              | -82.5831    | -114.4971  | 656151.2420 | -1.2651   |
| -1.2486               |             |            |             |           |
| [1187]ENERGY: 1220000 | 3101.7655   | 5022.4202  | 5333.4346   |           |
| 332.7915              | -15639.9201 | -1734.0355 | 0.0000      | 0.0000    |
| 7512.9955             | 3929.4517   | 300.5574   | -3583.5438  | 3991.0248 |
| 300.9533              | 36.0516     | 21.5662    | 656151.2420 | 1.4734    |
| 1.4650                |             |            |             |           |
| [1237]ENERGY: 1230000 | 3103.7455   | 5055.8053  | 5202.3414   |           |
| 336.8952              | -15677.3514 | -1690.6787 | 0.0000      | 0.0000    |
| 7600.2963             | 3931.0535   | 304.0499   | -3669.2427  | 3992.2642 |
| 300.7596              | 88.6856     | -6.0119    | 656151.2420 | -0.2738   |
| -0.2615               |             |            |             |           |
| [1273]ENERGY: 1240000 | 3079.5259   | 5126.8010  | 5205.7971   |           |
| 350.5200              | -15648.9079 | -1738.9795 | 0.0000      | 0.0000    |
| 7557.7723             | 3932.5288   | 302.3487   | -3625.2435  | 3991.9950 |
| 300.6867              | -34.9153    | -50.8640   | 656151.2420 | 1.7827    |
| 1.7733                |             |            |             |           |
| [1323]ENERGY: 1250000 | 3166.1027   | 5069.5940  | 5240.5757   |           |
| 314.7782              | -15708.1715 | -1697.7984 | 0.0000      | 0.0000    |
| 7548.1229             | 3933.2037   | 301.9627   | -3614.9192  | 3992.9418 |
| 300.9567              | -38.0565    | -67.4142   | 656151.2420 | -1.2282   |
| -1.2424               |             |            |             |           |
| [1359]ENERGY: 1260000 | 3126.3571   | 5052.1778  | 5277.9735   |           |
| 326.9479              | -15739.4444 | -1725.2962 | 0.0000      | 0.0000    |
| 7613.4785             | 3932.1943   | 304.5772   | -3681.2842  | 3993.2271 |
| 301.2066              | 30.6448     | 15.2658    | 656151.2420 | -1.0025   |
| -0.9879               |             |            |             |           |
| [1409]ENERGY: 1270000 | 3186.7795   | 5117.7206  | 5250.9870   |           |
| 347.1520              | -15727.0976 | -1769.5436 | 0.0000      | 0.0000    |
| 7525.4932             | 3931.4911   | 301.0574   | -3594.0021  | 3993.6041 |
| 301.1243              | -35.0756    | -65.7970   | 656151.2420 | 1.5760    |
| 1.5761                |             |            |             |           |
| [1445]ENERGY: 1280000 | 3184.6205   | 5070.6611  | 5222.7999   |           |
| 330.8682              | -15620.3638 | -1713.1598 | 0.0000      | 0.0000    |
| 7462.1614             | 3937.5875   | 298.5238   | -3524.5738  | 3993.6673 |
| 300.8761              | 23.3350     | 21.8410    | 656151.2420 | -1.2571   |
| -1.2670               |             |            |             |           |
| [1495]ENERGY: 1290000 | 3165.7844   | 5096.2674  | 5227.3057   |           |
| 359.8039              | -15766.9611 | -1702.2568 | 0.0000      | 0.0000    |
| 7553.4498             | 3933.3932   | 302.1758   | -3620.0567  | 3993.7284 |
| 301.1089              | 31.7780     | 16.6942    | 656151.2420 | 2.4470    |

Supplementary Text 6

2.4341  
 [1534]ENERGY: 1300000      3092.2028      5120.0240      5307.3247  
 329.4836      -15721.2808      -1766.6691      0.0000      0.0000  
 7570.1987      3931.2839      302.8458      -3638.9148      3994.2972  
 301.2549      60.2977      32.7408      656151.2420      -1.3890  
 -1.3848  
 [1584]ENERGY: 1310000      3119.2535      5085.3368      5288.9054  
 326.4813      -15720.2603      -1707.6237      0.0000      0.0000  
 7541.9736      3934.0667      301.7167      -3607.9069      3994.0717  
 301.1964      127.3238      99.7741      656151.2420      -1.7378  
 -1.7286  
 [1620]ENERGY: 1320000      3093.7106      5145.5057      5249.6797  
 339.5724      -15747.2907      -1695.9058      0.0000      0.0000  
 7548.9434      3934.2152      301.9955      -3614.7282      3995.8637  
 301.1275      122.8876      -4.0803      656151.2420      1.3400  
 1.3388  
 [1670]ENERGY: 1330000      3129.5508      5073.7137      5321.0238  
 334.2743      -15718.5594      -1788.5604      0.0000      0.0000  
 7582.3951      3933.8379      303.3337      -3648.5571      3995.8339  
 300.9519      -80.0610      -77.0076      656151.2420      -0.0003  
 0.0031  
 [1706]ENERGY: 1340000      3042.1725      5099.2504      5287.4190  
 337.1003      -15642.8362      -1697.9865      0.0000      0.0000  
 7507.6434      3932.7629      300.3433      -3574.8804      3994.5900  
 301.1841      -30.6884      37.0408      656151.2420      -0.6162  
 -0.6156  
 [1756]ENERGY: 1350000      3178.3367      5064.3092      5270.8475  
 337.6608      -15732.3425      -1721.7198      0.0000      0.0000  
 7540.2236      3937.3155      301.6466      -3602.9081      3995.9921  
 301.4323      124.1931      54.5352      656151.2420      -0.4457  
 -0.4608  
 [1792]ENERGY: 1360000      3167.5103      5111.2411      5255.3469  
 328.8455      -15727.9508      -1754.7989      0.0000      0.0000  
 7554.8324      3935.0265      302.2311      -3619.8060      3995.6638  
 301.2498      -112.7605      -59.9524      656151.2420      1.5894  
 1.6102  
 [1842]ENERGY: 1370000      3120.6887      5045.3195      5256.2097  
 332.3217      -15682.4049      -1738.3741      0.0000      0.0000  
 7603.0301      3936.7907      304.1592      -3666.2394      3995.6852  
 301.5272      144.8537      50.3519      656151.2420      0.0234  
 0.0069  
 [1878]ENERGY: 1380000      3184.2826      5097.7385      5286.9223  
 344.1554      -15744.6954      -1714.7214      0.0000      0.0000  
 7482.7615      3936.4435      299.3479      -3546.3180      3995.4789  
 301.2462      -59.9761      -66.3143      656151.2420      -0.4990  
 -0.4744  
 [1928]ENERGY: 1390000      3198.5600      5157.4490      5280.4024  
 311.5238      -15755.4931      -1720.3160      0.0000      0.0000  
 7467.0631      3939.1892      298.7199      -3527.8740      3995.3739  
 301.4271      -33.9930      -86.4707      656151.2420      0.9403  
 0.9469  
 [1967]ENERGY: 1400000      3144.9789      5072.5644      5257.7541  
 331.3486      -15712.1559      -1710.2985      0.0000      0.0000  
 7550.7170      3934.9088      302.0664      -3615.8083      3996.3414

Supplementary Text 6

|                       |             |            |             |           |
|-----------------------|-------------|------------|-------------|-----------|
| 301.5900              | -15.0458    | 64.4352    | 656151.2420 | -0.2359   |
| -0.2534               |             |            |             |           |
| [2017]ENERGY: 1410000 | 3160.5877   | 5123.2947  | 5290.5244   |           |
| 339.2333              | -15621.6876 | -1812.1626 | 0.0000      | 0.0000    |
| 7458.9854             | 3938.7752   | 298.3967   | -3520.2102  | 3996.5596 |
| 301.3866              | -100.2792   | -180.7632  | 656151.2420 | -0.4419   |
| -0.4496               |             |            |             |           |
| [2053]ENERGY: 1420000 | 3029.9497   | 5174.7437  | 5307.6297   |           |
| 312.4446              | -15701.4260 | -1719.7560 | 0.0000      | 0.0000    |
| 7529.0080             | 3932.5937   | 301.1980   | -3596.4143  | 3996.3828 |
| 301.5138              | 149.2735    | 96.8417    | 656151.2420 | -0.1406   |
| -0.1281               |             |            |             |           |
| [2103]ENERGY: 1430000 | 3131.3548   | 5096.2903  | 5221.1383   |           |
| 352.7365              | -15719.2081 | -1711.8529 | 0.0000      | 0.0000    |
| 7562.6766             | 3933.1354   | 302.5449   | -3629.5412  | 3996.5634 |
| 301.4552              | 69.5466     | -26.4306   | 656151.2420 | 0.7142    |
| 0.6830                |             |            |             |           |
| [2139]ENERGY: 1440000 | 3116.1853   | 5009.9323  | 5310.9272   |           |
| 354.0495              | -15631.9521 | -1768.7974 | 0.0000      | 0.0000    |
| 7543.8666             | 3934.2114   | 301.7924   | -3609.6552  | 3996.6916 |
| 301.3315              | -7.0683     | -21.5582   | 656151.2420 | 0.0862    |
| 0.1109                |             |            |             |           |
| [2189]ENERGY: 1450000 | 3073.2160   | 5077.9175  | 5235.1414   |           |
| 332.6808              | -15702.2017 | -1684.6644 | 0.0000      | 0.0000    |
| 7602.0801             | 3934.1697   | 304.1212   | -3667.9103  | 3997.2514 |
| 301.5020              | 31.7654     | 87.7517    | 656151.2420 | 0.4486    |
| 0.4308                |             |            |             |           |
| [2225]ENERGY: 1460000 | 3122.4731   | 5094.5564  | 5272.8319   |           |
| 352.6459              | -15753.6037 | -1707.2994 | 0.0000      | 0.0000    |
| 7554.8302             | 3936.4345   | 302.2310   | -3618.3957  | 3997.3223 |
| 301.3957              | -172.4570   | -90.2803   | 656151.2420 | -1.2930   |
| -1.2684               |             |            |             |           |
| [2275]ENERGY: 1470000 | 3133.1869   | 5159.6372  | 5232.3436   |           |
| 339.1830              | -15691.4828 | -1757.9858 | 0.0000      | 0.0000    |
| 7521.7477             | 3936.6298   | 300.9075   | -3585.1179  | 3998.1988 |
| 301.6756              | 18.0719     | -3.9715    | 656151.2420 | 1.0807    |
| 1.0657                |             |            |             |           |
| [2311]ENERGY: 1480000 | 3134.7065   | 5083.7288  | 5319.1768   |           |
| 314.2807              | -15724.1334 | -1734.0298 | 0.0000      | 0.0000    |
| 7543.0028             | 3936.7324   | 301.7578   | -3606.2704  | 3998.7304 |
| 301.6028              | 72.9195     | -11.1271   | 656151.2420 | -0.6209   |
| -0.6092               |             |            |             |           |
| [2361]ENERGY: 1490000 | 3110.3615   | 5071.7306  | 5277.9648   |           |
| 343.7396              | -15679.4592 | -1748.4654 | 0.0000      | 0.0000    |
| 7560.3568             | 3936.2288   | 302.4521   | -3624.1280  | 3999.0294 |
| 301.5579              | 34.6465     | -21.5684   | 656151.2420 | -0.4641   |
| -0.4659               |             |            |             |           |
| [2400]ENERGY: 1500000 | 3172.6596   | 5094.8279  | 5290.6828   |           |
| 339.7068              | -15712.1362 | -1648.3216 | 0.0000      | 0.0000    |
| 7404.3266             | 3941.7459   | 296.2101   | -3462.5807  | 3999.6528 |
| 301.3344              | 93.9347     | 201.1722   | 656151.2420 | 1.0311    |
| 1.0238                |             |            |             |           |
| [2450]ENERGY: 1510000 | 3195.3170   | 5070.0486  | 5251.4353   |           |
| 347.5939              | -15706.7699 | -1679.3776 | 0.0000      | 0.0000    |

## Supplementary Text 6

|                       |             |            |             |           |
|-----------------------|-------------|------------|-------------|-----------|
| 7466.3955             | 3944.6428   | 298.6931   | -3521.7527  | 4002.0325 |
| 301.4199              | 4.2737      | -7.2083    | 656151.2420 | 0.1116    |
| 0.1142                |             |            |             |           |
| [2486]ENERGY: 1520000 | 3044.2511   | 5122.7220  | 5295.3318   |           |
| 337.2040              | -15707.9288 | -1707.1123 | 0.0000      | 0.0000    |
| 7553.8537             | 3938.3215   | 302.1919   | -3615.5322  | 4000.9525 |
| 301.4743              | -1.7613     | -23.2669   | 656151.2420 | -1.4422   |
| -1.4506               |             |            |             |           |
| [2536]ENERGY: 1530000 | 3136.1963   | 5063.0961  | 5278.6558   |           |
| 326.1116              | -15654.4085 | -1763.6457 | 0.0000      | 0.0000    |
| 7552.7255             | 3938.7312   | 302.1468   | -3613.9943  | 4001.3416 |
| 301.4430              | 29.6048     | 53.2090    | 656151.2420 | 0.9144    |
| 0.9168                |             |            |             |           |
| [2572]ENERGY: 1540000 | 3108.8359   | 5049.2745  | 5328.3901   |           |
| 336.9242              | -15695.9062 | -1712.8469 | 0.0000      | 0.0000    |
| 7526.1778             | 3940.8495   | 301.0847   | -3585.3284  | 4002.5363 |
| 301.3137              | -17.7958    | -20.9396   | 656151.2420 | -3.0590   |
| -3.0345               |             |            |             |           |
| [2622]ENERGY: 1550000 | 3106.3656   | 5176.4882  | 5197.6299   |           |
| 339.4438              | -15701.7910 | -1758.3667 | 0.0000      | 0.0000    |
| 7578.1993             | 3937.9690   | 303.1659   | -3640.2303  | 4001.8375 |
| 301.3978              | -36.7296    | -28.8458   | 656151.2420 | 2.1731    |
| 2.1657                |             |            |             |           |
| [2658]ENERGY: 1560000 | 3127.0973   | 5086.0708  | 5291.0576   |           |
| 338.3608              | -15689.3842 | -1713.6026 | 0.0000      | 0.0000    |
| 7502.7799             | 3942.3796   | 300.1487   | -3560.4003  | 4001.2573 |
| 301.5652              | 85.0345     | -14.0353   | 656151.2420 | 0.5906    |
| 0.5874                |             |            |             |           |
| [2708]ENERGY: 1570000 | 3058.6967   | 5178.5954  | 5234.7069   |           |
| 335.2297              | -15781.1694 | -1721.6455 | 0.0000      | 0.0000    |
| 7633.1466             | 3937.5604   | 305.3640   | -3695.5862  | 4001.2126 |
| 301.6031              | 137.9398    | 31.0791    | 656151.2420 | -0.5187   |
| -0.5393               |             |            |             |           |
| [2744]ENERGY: 1580000 | 3217.5721   | 5107.6365  | 5279.0218   |           |
| 343.4268              | -15724.9703 | -1770.3668 | 0.0000      | 0.0000    |
| 7491.8638             | 3944.1840   | 299.7120   | -3547.6798  | 4001.9414 |
| 301.7767              | -150.9771   | -134.2512  | 656151.2420 | 1.9681    |
| 1.9955                |             |            |             |           |
| [2794]ENERGY: 1590000 | 3155.6460   | 5061.3783  | 5290.4332   |           |
| 352.3602              | -15620.3994 | -1780.0153 | 0.0000      | 0.0000    |
| 7483.8506             | 3943.2535   | 299.3914   | -3540.5971  | 4002.6238 |
| 301.5885              | 32.1802     | 15.8458    | 656151.2420 | -1.9370   |
| -1.9529               |             |            |             |           |
| [2833]ENERGY: 1600000 | 3101.7312   | 5124.0448  | 5313.9448   |           |
| 326.4631              | -15685.5813 | -1742.7406 | 0.0000      | 0.0000    |
| 7502.3303             | 3940.1923   | 300.1307   | -3562.1380  | 4001.7317 |
| 301.5778              | -56.5336    | -29.1028   | 656151.2420 | -0.5509   |
| -0.5614               |             |            |             |           |
| [2883]ENERGY: 1610000 | 3121.8907   | 5149.5729  | 5278.4289   |           |
| 313.7179              | -15742.6769 | -1733.6251 | 0.0000      | 0.0000    |
| 7552.7067             | 3940.0150   | 302.1460   | -3612.6917  | 4001.5518 |
| 301.5519              | -45.1462    | -49.7382   | 656151.2420 | 0.7974    |
| 0.8125                |             |            |             |           |
| [2919]ENERGY: 1620000 | 3152.3830   | 5045.0918  | 5302.9083   |           |



## Supplementary Text 6

|                       |             |            |             |           |
|-----------------------|-------------|------------|-------------|-----------|
| 344.1710              | -15712.4361 | -1703.1138 | 0.0000      | 0.0000    |
| 7514.0165             | 3943.0207   | 300.5982   | -3570.9958  | 4003.5360 |
| 301.8126              | 63.9146     | 41.4730    | 656151.2420 | -1.1653   |
| -1.1668               |             |            |             |           |
| [2969]ENERGY: 1630000 | 3050.8998   | 5124.2475  | 5292.7266   |           |
| 341.4259              | -15836.0834 | -1672.1088 | 0.0000      | 0.0000    |
| 7634.4632             | 3935.5708   | 305.4167   | -3698.8924  | 4002.6403 |
| 301.9037              | 51.2771     | 56.5106    | 656151.2420 | 0.2039    |
| 0.2101                |             |            |             |           |
| [3005]ENERGY: 1640000 | 3032.8364   | 5071.1137  | 5336.7453   |           |
| 330.1876              | -15614.9688 | -1761.8118 | 0.0000      | 0.0000    |
| 7547.9169             | 3942.0194   | 301.9544   | -3605.8975  | 4002.6160 |
| 301.8122              | 9.9398      | -21.7186   | 656151.2420 | 1.5884    |
| 1.5898                |             |            |             |           |
| [3055]ENERGY: 1650000 | 3215.1148   | 5170.0860  | 5259.2074   |           |
| 354.1419              | -15774.7367 | -1739.7728 | 0.0000      | 0.0000    |
| 7458.3656             | 3942.4061   | 298.3719   | -3515.9595  | 4003.1848 |
| 301.8832              | 62.9361     | -48.5371   | 656151.2420 | -0.2910   |
| -0.3119               |             |            |             |           |
| [3091]ENERGY: 1660000 | 3102.4322   | 5040.6194  | 5322.6325   |           |
| 327.2535              | -15627.0581 | -1814.1462 | 0.0000      | 0.0000    |
| 7590.4778             | 3942.2111   | 303.6571   | -3648.2667  | 4002.7298 |
| 301.7912              | 31.4788     | -26.4984   | 656151.2420 | 0.1260    |
| 0.1289                |             |            |             |           |
| [3141]ENERGY: 1670000 | 3138.0338   | 5056.0277  | 5289.7561   |           |
| 351.4223              | -15644.0974 | -1770.5998 | 0.0000      | 0.0000    |
| 7518.3395             | 3938.8823   | 300.7712   | -3579.4572  | 4000.9578 |
| 301.8049              | 65.5763     | 10.3378    | 656151.2420 | -2.2907   |
| -2.2823               |             |            |             |           |
| [3177]ENERGY: 1680000 | 3112.6163   | 5121.4851  | 5278.2181   |           |
| 335.9558              | -15696.0446 | -1762.8265 | 0.0000      | 0.0000    |
| 7549.6979             | 3939.1021   | 302.0257   | -3610.5958  | 4001.5477 |
| 302.0756              | -17.2812    | -37.0689   | 656151.2420 | 3.0822    |
| 3.0746                |             |            |             |           |
| [3227]ENERGY: 1690000 | 3163.7459   | 5052.4784  | 5292.6217   |           |
| 323.5012              | -15709.4928 | -1735.0511 | 0.0000      | 0.0000    |
| 7552.3241             | 3940.1276   | 302.1307   | -3612.1965  | 4000.8985 |
| 301.8542              | 59.4426     | 60.1142    | 656151.2420 | -1.7278   |
| -1.7065               |             |            |             |           |
| [3266]ENERGY: 1700000 | 3191.1916   | 5124.6331  | 5273.2064   |           |
| 353.8559              | -15853.7181 | -1697.3141 | 0.0000      | 0.0000    |
| 7544.5120             | 3936.3668   | 301.8182   | -3608.1452  | 4000.1043 |
| 301.7626              | -10.1117    | 85.8286    | 656151.2420 | 0.4128    |
| 0.3948                |             |            |             |           |
| [3316]ENERGY: 1710000 | 3127.1249   | 5068.2920  | 5288.0342   |           |
| 347.4041              | -15750.8373 | -1744.3936 | 0.0000      | 0.0000    |
| 7603.7161             | 3939.3405   | 304.1867   | -3664.3757  | 4001.0396 |
| 302.0366              | -49.8446    | -42.9743   | 656151.2420 | -0.2132   |
| -0.2184               |             |            |             |           |
| [3352]ENERGY: 1720000 | 3126.6602   | 5163.1473  | 5292.1021   |           |
| 319.3422              | -15678.9190 | -1803.5738 | 0.0000      | 0.0000    |
| 7523.7987             | 3942.5578   | 300.9896   | -3581.2409  | 4000.9318 |
| 301.8903              | 10.8589     | -59.5494   | 656151.2420 | -0.6551   |
| -0.6590               |             |            |             |           |

Supplementary Text 6

|                       |             |            |             |           |
|-----------------------|-------------|------------|-------------|-----------|
| [3402]ENERGY: 1730000 | 3108.2360   | 5138.9104  | 5231.6838   |           |
| 330.0156              | -15690.6904 | -1749.7300 | 0.0000      | 0.0000    |
| 7571.6452             | 3940.0706   | 302.9037   | -3631.5746  | 4000.6040 |
| 301.8414              | 63.0104     | -23.3931   | 656151.2420 | 0.8656    |
| 0.8995                |             |            |             |           |
| [3438]ENERGY: 1740000 | 3213.9203   | 5146.3495  | 5278.9667   |           |
| 326.1769              | -15860.7757 | -1691.4216 | 0.0000      | 0.0000    |
| 7525.3912             | 3938.6072   | 301.0533   | -3586.7840  | 3998.6094 |
| 301.8913              | 31.1415     | 119.4196   | 656151.2420 | 0.7338    |
| 0.7125                |             |            |             |           |
| [3488]ENERGY: 1750000 | 3132.3752   | 5145.3628  | 5306.1793   |           |
| 356.3386              | -15762.7211 | -1752.2833 | 0.0000      | 0.0000    |
| 7511.7498             | 3937.0012   | 300.5075   | -3574.7485  | 3999.9086 |
| 302.2275              | -131.2147   | -59.4601   | 656151.2420 | -1.5193   |
| -1.5143               |             |            |             |           |
| [3524]ENERGY: 1760000 | 3145.9480   | 5155.2912  | 5295.5878   |           |
| 326.4194              | -15734.9129 | -1744.7835 | 0.0000      | 0.0000    |
| 7496.9322             | 3940.4823   | 299.9148   | -3556.4499  | 3999.8810 |
| 302.4024              | 197.7511    | 106.1376   | 656151.2420 | -0.2241   |
| -0.2166               |             |            |             |           |
| [3574]ENERGY: 1770000 | 3197.3057   | 5135.9879  | 5281.3644   |           |
| 308.6581              | -15773.5485 | -1762.7478 | 0.0000      | 0.0000    |
| 7552.9175             | 3939.9373   | 302.1545   | -3612.9802  | 4000.4577 |
| 302.2942              | 184.9469    | 113.7402   | 656151.2420 | -1.4378   |
| -1.4553               |             |            |             |           |
| [3610]ENERGY: 1780000 | 3132.7855   | 4997.0156  | 5292.5314   |           |
| 343.2720              | -15701.5724 | -1758.2292 | 0.0000      | 0.0000    |
| 7629.9262             | 3935.7291   | 305.2352   | -3694.1972  | 4000.4693 |
| 302.2393              | -11.9419    | -54.6613   | 656151.2420 | 3.1372    |
| 3.1467                |             |            |             |           |
| [3660]ENERGY: 1790000 | 3183.6371   | 5101.3534  | 5269.2453   |           |
| 345.5131              | -15778.1712 | -1729.7976 | 0.0000      | 0.0000    |
| 7547.7068             | 3939.4868   | 301.9460   | -3608.2199  | 4001.5487 |
| 302.2044              | -15.0291    | -1.9234    | 656151.2420 | -0.1076   |
| -0.1086               |             |            |             |           |
| [3699]ENERGY: 1800000 | 3143.6471   | 5126.4161  | 5238.7519   |           |
| 302.2961              | -15785.7426 | -1726.1733 | 0.0000      | 0.0000    |
| 7641.2813             | 3940.4765   | 305.6895   | -3700.8047  | 4000.4445 |
| 302.2978              | -46.7762    | -40.9150   | 656151.2420 | 0.7462    |
| 0.7357                |             |            |             |           |
| [3749]ENERGY: 1810000 | 3132.6437   | 5154.3488  | 5315.1322   |           |
| 337.1721              | -15737.3121 | -1720.3776 | 0.0000      | 0.0000    |
| 7460.5795             | 3942.1866   | 298.4605   | -3518.3930  | 4001.2432 |
| 302.1240              | 31.9670     | 67.9515    | 656151.2420 | -0.9728   |
| -0.9631               |             |            |             |           |
| [3785]ENERGY: 1820000 | 3085.6018   | 5181.4329  | 5282.8352   |           |
| 346.0784              | -15770.8122 | -1707.4715 | 0.0000      | 0.0000    |
| 7523.2711             | 3940.9358   | 300.9685   | -3582.3353  | 4001.5826 |
| 301.9943              | 42.9772     | 16.5497    | 656151.2420 | -1.0739   |
| -1.0824               |             |            |             |           |
| [3835]ENERGY: 1830000 | 3101.8102   | 5187.0989  | 5284.4175   |           |
| 336.6790              | -15767.2198 | -1738.4440 | 0.0000      | 0.0000    |
| 7532.6399             | 3936.9816   | 301.3433   | -3595.6583  | 4001.8322 |
| 302.0236              | 19.7647     | 28.5755    | 656151.2420 | 1.6970    |

Supplementary Text 6

1.6971  
 [3871]ENERGY: 1840000      3146.5383      5141.3499      5296.0111  
 334.9195      -15782.7768      -1745.8729      0.0000      0.0000  
 7547.4468      3937.6159      301.9356      -3609.8310      4000.5194  
 301.9513      -72.0605      -122.0535      656151.2420      -2.5316  
 -2.5177  
 [3921]ENERGY: 1850000      3206.9136      5079.0581      5284.7830  
 336.5049      -15798.1807      -1748.0134      0.0000      0.0000  
 7576.7771      3937.8425      303.1090      -3638.9347      4000.9887  
 301.9462      12.9131      1.8567      656151.2420      1.8899  
 1.8934  
 [3957]ENERGY: 1860000      3123.2590      5142.7743      5264.8005  
 349.7420      -15727.0407      -1717.3945      0.0000      0.0000  
 7507.8548      3943.9953      300.3517      -3563.8595      4001.7217  
 301.9549      65.2586      -1.1913      656151.2420      1.9537  
 1.9553  
 [4007]ENERGY: 1870000      3115.3578      5114.6111      5287.5377  
 336.8478      -15793.5390      -1663.2392      0.0000      0.0000  
 7540.9963      3938.5726      301.6776      -3602.4237      4000.5055  
 301.8869      104.3655      51.3044      656151.2420      -2.5125  
 -2.5263  
 [4043]ENERGY: 1880000      3186.9140      5095.8429      5267.0836  
 353.1228      -15732.9651      -1747.6919      0.0000      0.0000  
 7515.4462      3937.7525      300.6554      -3577.6937      4000.7413  
 302.1046      86.1644      84.8527      656151.2420      0.0208  
 0.0303  
 [4093]ENERGY: 1890000      3161.6146      5182.8796      5256.8276  
 338.0380      -15800.5753      -1678.5428      0.0000      0.0000  
 7478.8446      3939.0862      299.1912      -3539.7584      4001.5415  
 302.1529      -48.7557      14.5006      656151.2420      0.1560  
 0.1603  
 [4132]ENERGY: 1900000      3174.8723      5121.8920      5234.3643  
 308.8725      -15682.8963      -1773.7065      0.0000      0.0000  
 7556.0986      3939.4969      302.2817      -3616.6016      4002.0940  
 302.1280      -195.7344      -135.7212      656151.2420      0.5689  
 0.5675  
 [4182]ENERGY: 1910000      3168.1697      5000.4033      5269.3314  
 334.4816      -15613.5654      -1770.4835      0.0000      0.0000  
 7557.4083      3945.7455      302.3341      -3611.6628      4001.9160  
 301.9811      -95.3639      -108.6229      656151.2420      -0.2399  
 -0.2396  
 [4218]ENERGY: 1920000      3166.7697      5245.3643      5277.5496  
 335.7481      -15764.5760      -1798.9838      0.0000      0.0000  
 7481.5904      3943.4623      299.3010      -3538.1281      4002.9538  
 302.0675      -91.3368      -57.9696      656151.2420      1.0369  
 1.0219  
 [4268]ENERGY: 1930000      3136.1754      5103.6423      5327.0137  
 358.9530      -15720.5233      -1792.6431      0.0000      0.0000  
 7527.3869      3940.0050      301.1331      -3587.3819      4003.3573  
 302.1214      -14.4507      39.7001      656151.2420      -0.3912  
 -0.3857  
 [4304]ENERGY: 1940000      3142.9184      5148.1692      5282.7945  
 349.2916      -15691.8603      -1806.1295      0.0000      0.0000  
 7515.7389      3940.9229      300.6671      -3574.8160      4002.9513

## Supplementary Text 6

|                       |             |            |             |           |
|-----------------------|-------------|------------|-------------|-----------|
| 302.0691              | -76.7266    | -32.2486   | 656151.2420 | 0.6723    |
| 0.6759                |             |            |             |           |
| [4354]ENERGY: 1950000 | 3180.7617   | 5114.9695  | 5304.4261   |           |
| 338.9161              | -15774.5928 | -1738.4698 | 0.0000      | 0.0000    |
| 7515.9315             | 3941.9425   | 300.6748   | -3573.9890  | 4004.0787 |
| 302.0653              | -48.4588    | -113.1975  | 656151.2420 | -2.1968   |
| -2.2072               |             |            |             |           |
| [4390]ENERGY: 1960000 | 3104.7124   | 5105.4622  | 5272.6698   |           |
| 334.8431              | -15769.1157 | -1674.9850 | 0.0000      | 0.0000    |
| 7570.8988             | 3944.4857   | 302.8738   | -3626.4131  | 4001.9747 |
| 301.9607              | 96.9628     | 151.0964   | 656151.2420 | -0.3070   |
| -0.2738               |             |            |             |           |
| [4440]ENERGY: 1970000 | 3184.5432   | 5054.4733  | 5237.5538   |           |
| 348.3751              | -15762.4625 | -1714.4691 | 0.0000      | 0.0000    |
| 7593.3474             | 3941.3613   | 303.7719   | -3651.9861  | 4001.7694 |
| 301.8936              | -116.6191   | -67.9287   | 656151.2420 | 0.0781    |
| 0.0657                |             |            |             |           |
| [4476]ENERGY: 1980000 | 3098.5690   | 5218.3547  | 5271.0912   |           |
| 341.9321              | -15768.6169 | -1751.0248 | 0.0000      | 0.0000    |
| 7530.4679             | 3940.7733   | 301.2564   | -3589.6946  | 4001.1852 |
| 302.1833              | -24.4965    | -42.8394   | 656151.2420 | -0.0532   |
| -0.0653               |             |            |             |           |
| [4526]ENERGY: 1990000 | 3129.6986   | 5151.7789  | 5244.8073   |           |
| 326.4080              | -15742.9989 | -1749.6387 | 0.0000      | 0.0000    |
| 7582.1132             | 3942.1682   | 303.3224   | -3639.9450  | 4001.1861 |
| 302.0410              | -63.6983    | 11.3554    | 656151.2420 | 0.6181    |
| 0.6311                |             |            |             |           |
| [4565]ENERGY: 2000000 | 3210.1056   | 5070.2962  | 5324.5510   |           |
| 339.6444              | -15818.2580 | -1752.7236 | 0.0000      | 0.0000    |
| 7566.9096             | 3940.5252   | 302.7142   | -3626.3844  | 3999.8689 |
| 302.1343              | -61.5178    | -72.9907   | 656151.2420 | 2.1028    |
| 2.0890                |             |            |             |           |
| [4615]ENERGY: 2010000 | 3131.2707   | 5026.3245  | 5258.6605   |           |
| 329.3715              | -15750.9094 | -1699.0321 | 0.0000      | 0.0000    |
| 7642.6725             | 3938.3582   | 305.7451   | -3704.3143  | 4001.0238 |
| 302.2061              | 27.9115     | 13.3034    | 656151.2420 | -2.4936   |
| -2.5037               |             |            |             |           |
| [4651]ENERGY: 2020000 | 3090.1899   | 5112.8239  | 5264.0030   |           |
| 338.6124              | -15700.5807 | -1738.5783 | 0.0000      | 0.0000    |
| 7573.5934             | 3940.0635   | 302.9816   | -3633.5299  | 4001.9368 |
| 302.2342              | 67.8924     | 24.8182    | 656151.2420 | 1.1845    |
| 1.1967                |             |            |             |           |
| [4701]ENERGY: 2030000 | 3123.6371   | 5106.6571  | 5220.8829   |           |
| 340.1108              | -15768.6231 | -1629.8818 | 0.0000      | 0.0000    |
| 7550.1303             | 3942.9135   | 302.0430   | -3607.2168  | 4001.2705 |
| 302.1750              | 116.9326    | 85.8052    | 656151.2420 | -1.7287   |
| -1.7383               |             |            |             |           |
| [4737]ENERGY: 2040000 | 3091.8154   | 5077.0325  | 5232.8556   |           |
| 303.7594              | -15717.8531 | -1729.6347 | 0.0000      | 0.0000    |
| 7678.6244             | 3936.5994   | 307.1834   | -3742.0250  | 4002.1427 |
| 302.2457              | -8.7319     | -49.7137   | 656151.2420 | 1.6215    |
| 1.6259                |             |            |             |           |
| [4787]ENERGY: 2050000 | 3087.1063   | 5048.9859  | 5269.3534   |           |
| 322.1354              | -15692.1594 | -1765.9525 | 0.0000      | 0.0000    |

## Supplementary Text 6

|                       |             |            |             |           |
|-----------------------|-------------|------------|-------------|-----------|
| 7668.4550             | 3937.9240   | 306.7765   | -3730.5311  | 4002.2427 |
| 302.1353              | 11.8708     | 9.4098     | 656151.2420 | -1.3037   |
| -1.2935               |             |            |             |           |
| [4823]ENERGY: 2060000 | 3160.6188   | 5128.1176  | 5244.3893   |           |
| 302.0829              | -15768.2646 | -1751.5010 | 0.0000      | 0.0000    |
| 7626.9027             | 3942.3456   | 305.1142   | -3684.5571  | 4003.4570 |
| 302.1508              | -19.5915    | -43.2914   | 656151.2420 | 0.3603    |
| 0.3524                |             |            |             |           |
| [4873]ENERGY: 2070000 | 3066.4038   | 5207.4369  | 5204.1679   |           |
| 335.3907              | -15657.8547 | -1757.4362 | 0.0000      | 0.0000    |
| 7541.4162             | 3939.5246   | 301.6944   | -3601.8916  | 4002.5081 |
| 302.0451              | 92.7479     | 36.8650    | 656151.2420 | 0.7586    |
| 0.7569                |             |            |             |           |
| [4909]ENERGY: 2080000 | 3168.8348   | 5118.1974  | 5228.4351   |           |
| 327.9501              | -15717.2629 | -1742.3616 | 0.0000      | 0.0000    |
| 7556.3307             | 3940.1236   | 302.2910   | -3616.2071  | 4001.9765 |
| 302.4393              | -99.4729    | -96.0981   | 656151.2420 | 0.7462    |
| 0.7498                |             |            |             |           |
| [4959]ENERGY: 2090000 | 3118.8735   | 5158.9874  | 5172.7596   |           |
| 329.6900              | -15799.9147 | -1736.3970 | 0.0000      | 0.0000    |
| 7693.2342             | 3937.2330   | 307.7678   | -3756.0013  | 4002.4175 |
| 302.4963              | 148.8438    | 117.7937   | 656151.2420 | -1.3021   |
| -1.3147               |             |            |             |           |
| [4998]ENERGY: 2100000 | 3195.5487   | 5196.4897  | 5260.8943   |           |
| 357.1556              | -15812.8926 | -1718.1172 | 0.0000      | 0.0000    |
| 7463.7137             | 3942.7921   | 298.5859   | -3520.9215  | 4001.2607 |
| 302.4630              | -170.5126   | -89.2159   | 656151.2420 | 1.9025    |
| 1.8977                |             |            |             |           |
| [5048]ENERGY: 2110000 | 3175.0792   | 5198.0966  | 5245.5446   |           |
| 336.1280              | -15771.6011 | -1687.8208 | 0.0000      | 0.0000    |
| 7449.8417             | 3945.2682   | 298.0309   | -3504.5735  | 4002.1054 |
| 302.4458              | 200.4947    | 196.4669   | 656151.2420 | -2.2332   |
| -2.1989               |             |            |             |           |
| [5084]ENERGY: 2120000 | 3176.2410   | 5102.3133  | 5254.2555   |           |
| 333.5848              | -15704.8117 | -1770.1943 | 0.0000      | 0.0000    |
| 7548.4873             | 3939.8758   | 301.9772   | -3608.6115  | 4002.5655 |
| 302.6341              | -75.3028    | -74.6976   | 656151.2420 | 0.5149    |
| 0.4943                |             |            |             |           |
| [5134]ENERGY: 2130000 | 3203.2909   | 5087.0059  | 5270.4374   |           |
| 314.1177              | -15705.7795 | -1833.4998 | 0.0000      | 0.0000    |
| 7604.9765             | 3940.5491   | 304.2371   | -3664.4274  | 4003.4630 |
| 302.6250              | -154.8311   | -108.2528  | 656151.2420 | -0.2428   |
| -0.2263               |             |            |             |           |
| [5170]ENERGY: 2140000 | 3210.5659   | 5162.2971  | 5241.4636   |           |
| 319.6246              | -15748.5103 | -1796.1818 | 0.0000      | 0.0000    |
| 7553.1185             | 3942.3776   | 302.1625   | -3610.7409  | 4002.2086 |
| 302.6207              | -88.0895    | -98.3808   | 656151.2420 | 0.5678    |
| 0.5489                |             |            |             |           |
| [5220]ENERGY: 2150000 | 3099.4997   | 5110.3384  | 5234.8120   |           |
| 342.0024              | -15718.6486 | -1722.6660 | 0.0000      | 0.0000    |
| 7595.2076             | 3940.5456   | 303.8463   | -3654.6620  | 4002.5330 |
| 302.6421              | 148.5102    | 11.9985    | 656151.2420 | -0.9109   |
| -0.9114               |             |            |             |           |
| [5256]ENERGY: 2160000 | 3246.2360   | 5137.1389  | 5242.2220   |           |

## Supplementary Text 6

|                       |             |            |             |           |
|-----------------------|-------------|------------|-------------|-----------|
| 323.4080              | -15734.2783 | -1773.5761 | 0.0000      | 0.0000    |
| 7498.5196             | 3939.6700   | 299.9783   | -3558.8496  | 4004.3197 |
| 302.6532              | -52.2991    | -69.8987   | 656151.2420 | 0.3117    |
| 0.3270                |             |            |             |           |
| [5306]ENERGY: 2170000 | 3226.2762   | 5202.4087  | 5190.6034   |           |
| 318.2896              | -15765.7604 | -1760.3025 | 0.0000      | 0.0000    |
| 7530.4237             | 3941.9388   | 301.2546   | -3588.4849  | 4002.5784 |
| 302.6050              | -15.3734    | -108.0749  | 656151.2420 | 0.6718    |
| 0.6418                |             |            |             |           |
| [5342]ENERGY: 2180000 | 3089.0484   | 5189.6619  | 5256.2904   |           |
| 326.3850              | -15802.9253 | -1750.9074 | 0.0000      | 0.0000    |
| 7629.2714             | 3936.8245   | 305.2090   | -3692.4469  | 4003.2569 |
| 302.7941              | 66.7716     | 16.3292    | 656151.2420 | -1.6804   |
| -1.6754               |             |            |             |           |
| [5392]ENERGY: 2190000 | 3195.5020   | 5042.5912  | 5216.9565   |           |
| 325.1379              | -15757.6534 | -1736.8358 | 0.0000      | 0.0000    |
| 7654.3468             | 3940.0454   | 306.2121   | -3714.3015  | 4003.3395 |
| 302.6053              | -102.3698   | -106.6809  | 656151.2420 | 1.7577    |
| 1.7756                |             |            |             |           |
| [5431]ENERGY: 2200000 | 3205.4792   | 5202.5705  | 5230.0297   |           |
| 337.7623              | -15852.4070 | -1680.1632 | 0.0000      | 0.0000    |
| 7500.7259             | 3943.9972   | 300.0665   | -3556.7287  | 4002.8657 |
| 302.7850              | 69.1633     | 75.9002    | 656151.2420 | 0.6337    |
| 0.6290                |             |            |             |           |
| [5481]ENERGY: 2210000 | 3195.1925   | 5177.3236  | 5201.3621   |           |
| 346.6085              | -15737.5368 | -1728.7476 | 0.0000      | 0.0000    |
| 7490.5180             | 3944.7202   | 299.6582   | -3545.7977  | 4002.8968 |
| 302.7125              | -21.9702    | -33.7878   | 656151.2420 | -0.7592   |
| -0.7667               |             |            |             |           |
| [5517]ENERGY: 2220000 | 3141.1278   | 5156.9512  | 5210.4246   |           |
| 343.4263              | -15752.3167 | -1712.9392 | 0.0000      | 0.0000    |
| 7555.0902             | 3941.7642   | 302.2414   | -3613.3260  | 4002.9805 |
| 302.5024              | 136.2451    | 54.9678    | 656151.2420 | -1.5597   |
| -1.5559               |             |            |             |           |
| [5567]ENERGY: 2230000 | 3257.6442   | 5172.1769  | 5237.0479   |           |
| 350.6302              | -15811.7204 | -1801.1296 | 0.0000      | 0.0000    |
| 7534.7153             | 3939.3645   | 301.4263   | -3595.3508  | 4003.2787 |
| 302.6077              | -89.5324    | -157.9186  | 656151.2420 | 0.3523    |
| 0.3361                |             |            |             |           |
| [5603]ENERGY: 2240000 | 3177.1449   | 5115.4621  | 5224.9256   |           |
| 341.2695              | -15817.9337 | -1657.3671 | 0.0000      | 0.0000    |
| 7557.1383             | 3940.6395   | 302.3233   | -3616.4988  | 4002.7007 |
| 302.6586              | 102.6752    | 29.3581    | 656151.2420 | -3.7356   |
| -3.7255               |             |            |             |           |
| [5653]ENERGY: 2250000 | 3132.8800   | 5165.2777  | 5295.0537   |           |
| 331.3875              | -15802.8227 | -1716.5587 | 0.0000      | 0.0000    |
| 7538.6374             | 3943.8549   | 301.5832   | -3594.7825  | 4004.0015 |
| 303.4477              | 28.2203     | -8.3677    | 656151.2420 | -2.0371   |
| -2.0295               |             |            |             |           |
| [5689]ENERGY: 2260000 | 3108.4819   | 5086.1812  | 5259.3758   |           |
| 350.4885              | -15760.2797 | -1762.7710 | 0.0000      | 0.0000    |
| 7657.1185             | 3938.5952   | 306.3230   | -3718.5233  | 4004.4651 |
| 303.3032              | 24.8646     | 48.2427    | 656151.2420 | -12.1146  |
| -12.1047              |             |            |             |           |

## Supplementary Text 6

|                       |             |            |             |           |
|-----------------------|-------------|------------|-------------|-----------|
| [5739]ENERGY: 2270000 | 3134.7698   | 5097.7581  | 5227.3242   |           |
| 322.5484              | -15804.2229 | -1702.7994 | 0.0000      | 0.0000    |
| 7663.6234             | 3939.0016   | 306.5833   | -3724.6219  | 4003.7310 |
| 303.3342              | 101.0289    | 101.6134   | 656151.2420 | -20.1282  |
| -20.1401              |             |            |             |           |
| [5775]ENERGY: 2280000 | 3207.3796   | 5117.4534  | 5228.3865   |           |
| 338.4008              | -15780.1046 | -1748.0418 | 0.0000      | 0.0000    |
| 7582.6121             | 3946.0859   | 303.3424   | -3636.5261  | 4004.5158 |
| 303.5390              | 10.9608     | -63.0946   | 656151.2420 | -8.1724   |
| -8.1694               |             |            |             |           |
| [5825]ENERGY: 2290000 | 3166.9422   | 5222.8530  | 5230.2281   |           |
| 323.4173              | -15735.8819 | -1802.1102 | 0.0000      | 0.0000    |
| 7539.9213             | 3945.3698   | 301.6345   | -3594.5515  | 4003.5398 |
| 303.5616              | -91.3545    | -27.4800   | 656151.2420 | -11.6930  |
| -11.6978              |             |            |             |           |
| [5864]ENERGY: 2300000 | 3254.1805   | 5191.4367  | 5228.5185   |           |
| 353.8740              | -15921.8516 | -1750.5822 | 0.0000      | 0.0000    |
| 7585.7341             | 3941.3101   | 303.4673   | -3644.4240  | 4003.8028 |
| 303.4788              | -50.7503    | -30.3028   | 656151.2420 | -14.9534  |
| -14.9444              |             |            |             |           |
| [5914]ENERGY: 2310000 | 3062.2500   | 5209.6856  | 5218.4696   |           |
| 337.7124              | -15781.2385 | -1765.6821 | 0.0000      | 0.0000    |
| 7656.8660             | 3938.0630   | 306.3129   | -3718.8029  | 4002.4446 |
| 303.5187              | 114.1866    | 135.6266   | 656151.2420 | -10.9785  |
| -10.9736              |             |            |             |           |
| [5950]ENERGY: 2320000 | 3278.6750   | 5198.1663  | 5239.0918   |           |
| 332.6940              | -15935.5081 | -1732.3540 | 0.0000      | 0.0000    |
| 7561.1984             | 3941.9635   | 302.4857   | -3619.2349  | 4003.5019 |
| 303.3314              | -134.3948   | -99.7047   | 656151.2420 | -16.1806  |
| -16.1953              |             |            |             |           |
| [6000]ENERGY: 2330000 | 3150.5684   | 5114.7155  | 5243.3964   |           |
| 345.2353              | -15766.9428 | -1742.8458 | 0.0000      | 0.0000    |
| 7596.7456             | 3940.8725   | 303.9078   | -3655.8730  | 4002.8330 |
| 303.5670              | -29.9106    | -29.0853   | 656151.2420 | -6.1073   |
| -6.0953               |             |            |             |           |
| [6036]ENERGY: 2340000 | 3085.6990   | 5187.8735  | 5311.5634   |           |
| 334.4501              | -15705.8098 | -1785.8649 | 0.0000      | 0.0000    |
| 7513.0395             | 3940.9508   | 300.5591   | -3572.0887  | 4003.6437 |
| 303.7054              | -13.3238    | -55.7282   | 656151.2420 | -15.4372  |
| -15.4374              |             |            |             |           |
| [6086]ENERGY: 2350000 | 3108.0777   | 5214.8109  | 5215.5118   |           |
| 315.3994              | -15793.2455 | -1730.4779 | 0.0000      | 0.0000    |
| 7608.4945             | 3938.5709   | 304.3778   | -3669.9236  | 4002.7987 |
| 303.4817              | -145.4004   | -153.7805  | 656151.2420 | -11.3612  |
| -11.3585              |             |            |             |           |
| [6122]ENERGY: 2360000 | 3139.3696   | 5234.5458  | 5238.3699   |           |
| 349.1377              | -15724.2268 | -1781.4766 | 0.0000      | 0.0000    |
| 7488.4101             | 3944.1298   | 299.5738   | -3544.2803  | 4002.8815 |
| 303.4674              | 19.3285     | -1.0628    | 656151.2420 | -9.8396   |
| -9.8481               |             |            |             |           |
| [6172]ENERGY: 2370000 | 3140.1914   | 5132.9616  | 5242.9826   |           |
| 321.3774              | -15735.5593 | -1732.4172 | 0.0000      | 0.0000    |
| 7574.4716             | 3944.0082   | 303.0167   | -3630.4634  | 4001.6703 |
| 303.6291              | -35.3803    | 56.1541    | 656151.2420 | -10.1125  |

Supplementary Text 6

-10.1148  
 [6208]ENERGY: 2380000      3149.2437      5222.6201      5259.3151  
 330.2510      -15867.3046      -1702.4582      0.0000      0.0000  
 7548.7959      3940.4629      301.9896      -3608.3330      4001.1655  
 303.6890      100.4501      33.9899      656151.2420      -11.0325  
 -11.0225  
 [6258]ENERGY: 2390000      3158.7909      5213.5435      5279.9211  
 300.7634      -15799.6795      -1759.5115      0.0000      0.0000  
 7550.7325      3944.5604      302.0671      -3606.1721      4002.7922  
 303.7253      146.5380      43.1227      656151.2420      -13.5642  
 -13.5850  
 [6297]ENERGY: 2400000      3249.7838      5208.1729      5278.4430  
 315.6764      -15882.7624      -1743.6652      0.0000      0.0000  
 7516.2446      3941.8930      300.6874      -3574.3516      4002.0714  
 303.7689      102.7185      64.0213      656151.2420      -19.9847  
 -19.9776  
 [6347]ENERGY: 2410000      3203.1306      5111.4271      5253.8155  
 348.9482      -15687.8630      -1906.9561      0.0000      0.0000  
 7619.3232      3941.8254      304.8110      -3677.4978      4002.8606  
 303.8017      -49.4767      -138.3456      656151.2420      -19.5819  
 -19.5801  
 [6383]ENERGY: 2420000      3132.3158      5058.5118      5224.1339  
 350.7016      -15743.4411      -1713.9505      0.0000      0.0000  
 7631.8728      3940.1442      305.3131      -3691.7286      4000.8728  
 303.7666      182.0528      128.6366      656151.2420      -16.8757  
 -16.8642  
 [6433]ENERGY: 2430000      3184.9268      5197.4857      5292.5949  
 352.7490      -15889.4619      -1770.8176      0.0000      0.0000  
 7575.5199      3942.9969      303.0587      -3632.5230      4003.0005  
 303.7374      -9.7919      -63.2916      656151.2420      -20.6712  
 -20.6784  
 [6469]ENERGY: 2440000      3107.2641      5173.1274      5308.1244  
 344.3945      -15916.7077      -1652.5700      0.0000      0.0000  
 7579.6692      3943.3019      303.2247      -3636.3674      4003.0043  
 303.7920      167.6702      82.7078      656151.2420      -17.9965  
 -18.0117  
 [6519]ENERGY: 2450000      3065.6582      5116.8449      5321.4641  
 331.4253      -15803.7558      -1705.2531      0.0000      0.0000  
 7615.9895      3942.3732      304.6777      -3673.6163      4003.2039  
 303.7460      40.6605      -26.4443      656151.2420      -14.4294  
 -14.4196  
 [6555]ENERGY: 2460000      3135.9717      5217.5639      5279.2644  
 334.0823      -15796.8327      -1826.6376      0.0000      0.0000  
 7598.9765      3942.3885      303.9971      -3656.5880      4003.5086  
 303.7907      70.9342      -16.8022      656151.2420      -19.8021  
 -19.8043  
 [6605]ENERGY: 2470000      3167.0493      5217.6431      5269.6632  
 321.7337      -15902.7376      -1743.1261      0.0000      0.0000  
 7611.4780      3941.7036      304.4972      -3669.7744      4002.0636  
 303.9245      7.2189      41.6153      656151.2420      -18.0422  
 -18.0274  
 [6641]ENERGY: 2480000      3189.0556      5114.5316      5221.1582  
 357.2565      -15769.9154      -1757.1686      0.0000      0.0000  
 7585.9946      3940.9125      303.4777      -3645.0821      4003.0902



## Supplementary Text 6

|                       |             |            |             |           |
|-----------------------|-------------|------------|-------------|-----------|
| 303.8463              | -42.6548    | -82.5761   | 656151.2420 | -20.6323  |
| -20.6421              |             |            |             |           |
| [6691]ENERGY: 2490000 | 3121.8998   | 5279.8720  | 5274.7923   |           |
| 312.2904              | -15757.3986 | -1787.9173 | 0.0000      | 0.0000    |
| 7501.5423             | 3945.0809   | 300.0992   | -3556.4614  | 4002.5714 |
| 303.7346              | 41.5317     | 8.5729     | 656151.2420 | -16.7883  |
| -16.7808              |             |            |             |           |
| [6730]ENERGY: 2500000 | 3155.3811   | 5103.7586  | 5240.2491   |           |
| 309.6914              | -15683.6101 | -1766.7566 | 0.0000      | 0.0000    |
| 7584.6672             | 3943.3807   | 303.4246   | -3641.2864  | 4003.4966 |
| 303.6752              | -9.4746     | 4.5628     | 656151.2420 | -14.3410  |
| -14.3428              |             |            |             |           |
| [6780]ENERGY: 2510000 | 3100.2506   | 5239.6014  | 5238.5357   |           |
| 333.6457              | -15801.8293 | -1779.8353 | 0.0000      | 0.0000    |
| 7612.4602             | 3942.8290   | 304.5365   | -3669.6312  | 4002.8669 |
| 303.8739              | 60.8943     | 101.4629   | 656151.2420 | -16.1407  |
| -16.1483              |             |            |             |           |
| [6816]ENERGY: 2520000 | 3282.4376   | 5214.9810  | 5211.5000   |           |
| 323.2964              | -15799.7360 | -1866.2596 | 0.0000      | 0.0000    |
| 7576.9389             | 3943.1584   | 303.1154   | -3633.7805  | 4001.8454 |
| 303.9822              | -253.3885   | -219.3876  | 656151.2420 | -15.9081  |
| -15.8857              |             |            |             |           |
| [6866]ENERGY: 2530000 | 3190.2924   | 5109.3753  | 5249.8790   |           |
| 340.3672              | -15756.9765 | -1833.5259 | 0.0000      | 0.0000    |
| 7641.0894             | 3940.5009   | 305.6818   | -3700.5885  | 4003.3073 |
| 303.9390              | 11.3449     | -23.2533   | 656151.2420 | -15.9548  |
| -15.9712              |             |            |             |           |
| [6902]ENERGY: 2540000 | 3160.7817   | 5152.4038  | 5266.7623   |           |
| 319.5078              | -15720.7839 | -1818.7770 | 0.0000      | 0.0000    |
| 7579.5306             | 3939.4252   | 303.2191   | -3640.1054  | 4003.6855 |
| 304.0137              | 89.6818     | 30.3302    | 656151.2420 | -19.9455  |
| -19.9406              |             |            |             |           |
| [6952]ENERGY: 2550000 | 3103.2927   | 5254.2276  | 5250.1213   |           |
| 343.0612              | -15851.4015 | -1774.5763 | 0.0000      | 0.0000    |
| 7617.9324             | 3942.6574   | 304.7554   | -3675.2750  | 4004.2081 |
| 304.0696              | -76.3393    | -61.2962   | 656151.2420 | -14.2384  |
| -14.2349              |             |            |             |           |
| [6988]ENERGY: 2560000 | 3098.8388   | 5158.4779  | 5256.9361   |           |
| 335.8229              | -15763.2944 | -1821.8213 | 0.0000      | 0.0000    |
| 7674.5151             | 3939.4752   | 307.0190   | -3735.0399  | 4003.1940 |
| 303.9632              | -31.7193    | -0.8599    | 656151.2420 | -20.5145  |
| -20.5235              |             |            |             |           |
| [7038]ENERGY: 2570000 | 3128.5483   | 5176.2264  | 5236.3031   |           |
| 348.0838              | -15768.0370 | -1777.9152 | 0.0000      | 0.0000    |
| 7595.6255             | 3938.8349   | 303.8630   | -3656.7906  | 4003.6738 |
| 303.7942              | 148.7436    | 86.7086    | 656151.2420 | -15.5015  |
| -15.5091              |             |            |             |           |
| [7074]ENERGY: 2580000 | 3175.3071   | 5187.0035  | 5282.3779   |           |
| 351.9794              | -15821.8028 | -1783.9781 | 0.0000      | 0.0000    |
| 7552.8407             | 3943.7278   | 302.1514   | -3609.1129  | 4004.0228 |
| 303.7480              | 90.0577     | 18.8843    | 656151.2420 | -15.9034  |
| -15.8987              |             |            |             |           |
| [7124]ENERGY: 2590000 | 3128.5811   | 5229.1024  | 5247.5452   |           |
| 357.0105              | -15824.0957 | -1830.1000 | 0.0000      | 0.0000    |

## Supplementary Text 6

|                       |             |            |             |           |
|-----------------------|-------------|------------|-------------|-----------|
| 7632.1215             | 3940.1650   | 305.3230   | -3691.9565  | 4002.7828 |
| 303.7871              | 2.6263      | -44.7818   | 656151.2420 | -15.4872  |
| -15.4700              |             |            |             |           |
| [7163]ENERGY: 2600000 | 3161.7352   | 5188.8594  | 5237.1707   |           |
| 333.2387              | -15855.0819 | -1701.0485 | 0.0000      | 0.0000    |
| 7576.9092             | 3941.7828   | 303.1143   | -3635.1264  | 4002.8916 |
| 303.6752              | 127.3027    | 111.6301   | 656151.2420 | -17.4887  |
| -17.5051              |             |            |             |           |
| [7213]ENERGY: 2610000 | 3161.2003   | 5162.1648  | 5270.5169   |           |
| 322.1879              | -15766.4269 | -1748.7574 | 0.0000      | 0.0000    |
| 7539.8110             | 3940.6966   | 301.6301   | -3599.1144  | 4002.2854 |
| 303.7699              | -17.5688    | 4.1711     | 656151.2420 | -18.2021  |
| -18.2096              |             |            |             |           |
| [7249]ENERGY: 2620000 | 3152.7857   | 5190.0596  | 5284.1066   |           |
| 339.4255              | -15778.1075 | -1777.7486 | 0.0000      | 0.0000    |
| 7536.8742             | 3947.3956   | 301.5127   | -3589.4787  | 4003.3716 |
| 303.7440              | 84.2294     | 9.4900     | 656151.2420 | -20.3405  |
| -20.3279              |             |            |             |           |
| [7299]ENERGY: 2630000 | 3210.0399   | 5128.4339  | 5248.2915   |           |
| 339.4770              | -15751.7212 | -1790.3507 | 0.0000      | 0.0000    |
| 7556.5632             | 3940.7337   | 302.3003   | -3615.8295  | 4001.3485 |
| 303.8169              | -77.1483    | -94.3878   | 656151.2420 | -19.4171  |
| -19.4068              |             |            |             |           |
| [7335]ENERGY: 2640000 | 3112.1294   | 5165.3137  | 5286.5112   |           |
| 348.4694              | -15742.5554 | -1806.9531 | 0.0000      | 0.0000    |
| 7577.1731             | 3940.0883   | 303.1248   | -3637.0848  | 4002.2308 |
| 303.7017              | -137.2808   | -105.6673  | 656151.2420 | -18.2698  |
| -18.2709              |             |            |             |           |
| [7385]ENERGY: 2650000 | 3031.7110   | 5226.9504  | 5249.9020   |           |
| 338.3445              | -15688.9801 | -1786.5798 | 0.0000      | 0.0000    |
| 7571.6118             | 3942.9598   | 302.9023   | -3628.6520  | 4001.3067 |
| 303.8751              | -66.1988    | -43.3419   | 656151.2420 | -18.1531  |
| -18.1553              |             |            |             |           |
| [7421]ENERGY: 2660000 | 3090.9894   | 5236.3353  | 5216.1025   |           |
| 341.4232              | -15866.9141 | -1746.6802 | 0.0000      | 0.0000    |
| 7667.8310             | 3939.0872   | 306.7516   | -3728.7438  | 4001.4058 |
| 303.7877              | -15.9562    | -9.8661    | 656151.2420 | -13.7924  |
| -13.7870              |             |            |             |           |
| [7471]ENERGY: 2670000 | 3152.7300   | 5177.9650  | 5229.5321   |           |
| 344.3152              | -15785.9299 | -1798.8445 | 0.0000      | 0.0000    |
| 7618.4911             | 3938.2590   | 304.7777   | -3680.2321  | 4001.6827 |
| 303.7519              | -46.6472    | -75.0376   | 656151.2420 | -21.7012  |
| -21.7127              |             |            |             |           |
| [7507]ENERGY: 2680000 | 3111.8205   | 5188.2269  | 5268.0587   |           |
| 329.5929              | -15737.9934 | -1784.7718 | 0.0000      | 0.0000    |
| 7565.4690             | 3940.4029   | 302.6566   | -3625.0661  | 4002.6846 |
| 303.8955              | -50.6914    | -21.6951   | 656151.2420 | -13.3678  |
| -13.3748              |             |            |             |           |
| [7557]ENERGY: 2690000 | 3173.6798   | 5170.6171  | 5218.0916   |           |
| 347.7057              | -15765.0042 | -1764.8302 | 0.0000      | 0.0000    |
| 7562.4441             | 3942.7039   | 302.5356   | -3619.7402  | 4004.2125 |
| 303.6710              | 210.4740    | 33.8848    | 656151.2420 | -21.1352  |
| -21.1194              |             |            |             |           |
| [7596]ENERGY: 2700000 | 3109.0230   | 5176.0979  | 5237.5329   |           |

## Supplementary Text 6

|                       |             |            |             |           |
|-----------------------|-------------|------------|-------------|-----------|
| 336.3589              | -15813.1026 | -1798.7137 | 0.0000      | 0.0000    |
| 7692.2478             | 3939.4443   | 307.7284   | -3752.8035  | 4002.3716 |
| 303.5183              | 5.2784      | -57.2415   | 656151.2420 | -13.8440  |
| -13.8619              |             |            |             |           |
| [7646]ENERGY: 2710000 | 3228.3691   | 5217.8505  | 5238.0560   |           |
| 337.9008              | -15840.6239 | -1768.5375 | 0.0000      | 0.0000    |
| 7527.9274             | 3940.9423   | 301.1547   | -3586.9851  | 4001.2441 |
| 303.6083              | 0.6940      | 17.6192    | 656151.2420 | -21.9489  |
| -21.9448              |             |            |             |           |
| [7682]ENERGY: 2720000 | 3121.9174   | 5230.9762  | 5303.7744   |           |
| 333.8166              | -15853.8276 | -1744.2880 | 0.0000      | 0.0000    |
| 7547.6899             | 3940.0590   | 301.9453   | -3607.6310  | 4001.7809 |
| 303.9750              | -103.9768   | -29.8602   | 656151.2420 | -17.4003  |
| -17.3935              |             |            |             |           |
| [7732]ENERGY: 2730000 | 3120.6795   | 5184.4515  | 5267.9106   |           |
| 341.4438              | -15765.6391 | -1815.4895 | 0.0000      | 0.0000    |
| 7608.6936             | 3942.0503   | 304.3858   | -3666.6433  | 4002.5566 |
| 303.9160              | -43.7655    | -52.7125   | 656151.2420 | -15.2256  |
| -15.2365              |             |            |             |           |
| [7768]ENERGY: 2740000 | 3199.8684   | 5283.8089  | 5261.5657   |           |
| 344.8194              | -15946.7476 | -1797.5971 | 0.0000      | 0.0000    |
| 7594.5873             | 3940.3051   | 303.8215   | -3654.2822  | 4002.1771 |
| 303.9965              | -15.6775    | -143.1812  | 656151.2420 | -20.6918  |
| -20.6952              |             |            |             |           |
| [7818]ENERGY: 2750000 | 3104.5966   | 5250.6541  | 5261.0432   |           |
| 340.9119              | -15791.2532 | -1775.9701 | 0.0000      | 0.0000    |
| 7547.1391             | 3937.1215   | 301.9233   | -3610.0176  | 4001.6878 |
| 303.9062              | -37.1344    | -72.4468   | 656151.2420 | -17.7211  |
| -17.7136              |             |            |             |           |
| [7854]ENERGY: 2760000 | 3098.6399   | 5136.0499  | 5278.3749   |           |
| 337.2294              | -15794.1598 | -1744.5766 | 0.0000      | 0.0000    |
| 7628.0985             | 3939.6563   | 305.1621   | -3688.4422  | 4002.1685 |
| 303.9198              | -18.4339    | -15.8414   | 656151.2420 | -19.3517  |
| -19.3569              |             |            |             |           |
| [7904]ENERGY: 2770000 | 3149.2592   | 5112.6775  | 5305.7957   |           |
| 328.2712              | -15822.2763 | -1782.7605 | 0.0000      | 0.0000    |
| 7649.0326             | 3939.9993   | 305.9995   | -3709.0333  | 4003.2665 |
| 303.9358              | -74.5953    | -17.1102   | 656151.2420 | -17.7554  |
| -17.7448              |             |            |             |           |
| [7940]ENERGY: 2780000 | 3234.8720   | 5162.7446  | 5306.3520   |           |
| 328.9194              | -15896.8258 | -1794.0529 | 0.0000      | 0.0000    |
| 7597.6254             | 3939.6347   | 303.9430   | -3657.9907  | 4004.0251 |
| 303.9446              | -34.7951    | 23.2730    | 656151.2420 | -20.3506  |
| -20.3532              |             |            |             |           |
| [7990]ENERGY: 2790000 | 3128.8725   | 5236.1486  | 5252.3445   |           |
| 346.1051              | -15834.0108 | -1750.9226 | 0.0000      | 0.0000    |
| 7563.1002             | 3941.6374   | 302.5618   | -3621.4628  | 4005.3672 |
| 304.0093              | -112.8641   | -106.5476  | 656151.2420 | -17.5085  |
| -17.5166              |             |            |             |           |
| [8029]ENERGY: 2800000 | 3163.7388   | 5178.5958  | 5263.8565   |           |
| 338.1367              | -15789.1605 | -1792.2651 | 0.0000      | 0.0000    |
| 7580.7415             | 3943.6437   | 303.2676   | -3637.0978  | 4005.4075 |
| 304.1312              | -77.5625    | -79.4347   | 656151.2420 | -25.3907  |
| -25.3666              |             |            |             |           |

## Supplementary Text 6

|                       |             |            |             |           |
|-----------------------|-------------|------------|-------------|-----------|
| [8079]ENERGY: 2810000 | 3183.2179   | 5209.9740  | 5229.6786   |           |
| 342.5530              | -15853.9634 | -1751.5280 | 0.0000      | 0.0000    |
| 7582.8752             | 3942.8073   | 303.3529   | -3640.0679  | 4003.1202 |
| 304.1292              | -20.9462    | -34.7495   | 656151.2420 | -15.8699  |
| -15.8984              |             |            |             |           |
| [8115]ENERGY: 2820000 | 3125.2497   | 5165.8880  | 5305.4875   |           |
| 339.5760              | -15878.6984 | -1723.8466 | 0.0000      | 0.0000    |
| 7609.4976             | 3943.1538   | 304.4179   | -3666.3438  | 4004.2314 |
| 304.0037              | 104.6584    | 67.6635    | 656151.2420 | -19.6327  |
| -19.6090              |             |            |             |           |
| [8165]ENERGY: 2830000 | 3119.1781   | 5218.9876  | 5281.0918   |           |
| 316.9236              | -15766.2603 | -1836.7912 | 0.0000      | 0.0000    |
| 7609.4737             | 3942.6032   | 304.4170   | -3666.8705  | 4005.0417 |
| 304.1939              | 50.0102     | 14.3450    | 656151.2420 | -17.5944  |
| -17.6130              |             |            |             |           |
| [8201]ENERGY: 2840000 | 3183.6770   | 5189.1199  | 5252.5498   |           |
| 345.7999              | -15832.5839 | -1781.6495 | 0.0000      | 0.0000    |
| 7585.3786             | 3942.2917   | 303.4531   | -3643.0868  | 4003.9008 |
| 304.1160              | 63.7558     | 87.9742    | 656151.2420 | -21.2763  |
| -21.2772              |             |            |             |           |
| [8251]ENERGY: 2850000 | 3151.8200   | 5220.3432  | 5228.9708   |           |
| 328.9897              | -15694.4697 | -1820.9086 | 0.0000      | 0.0000    |
| 7528.1828             | 3942.9283   | 301.1650   | -3585.2545  | 4003.6926 |
| 304.2162              | -85.1667    | -108.8215  | 656151.2420 | -19.8479  |
| -19.8391              |             |            |             |           |
| [8287]ENERGY: 2860000 | 3075.5606   | 5287.2606  | 5260.3527   |           |
| 348.4361              | -15806.3242 | -1805.9678 | 0.0000      | 0.0000    |
| 7582.4722             | 3941.7902   | 303.3368   | -3640.6820  | 4004.5437 |
| 304.1993              | -179.0917   | -185.0232  | 656151.2420 | -18.2880  |
| -18.2935              |             |            |             |           |
| [8337]ENERGY: 2870000 | 3133.1266   | 5228.3307  | 5313.4445   |           |
| 345.7975              | -15857.4392 | -1832.0681 | 0.0000      | 0.0000    |
| 7609.1598             | 3940.3518   | 304.4044   | -3668.8080  | 4003.5120 |
| 304.1905              | -5.2162     | -14.4162   | 656151.2420 | -17.3997  |
| -17.3949              |             |            |             |           |
| [8373]ENERGY: 2880000 | 3138.5263   | 5216.0475  | 5264.4696   |           |
| 359.4606              | -15849.0313 | -1858.3752 | 0.0000      | 0.0000    |
| 7673.4707             | 3944.5681   | 306.9772   | -3728.9025  | 4004.7777 |
| 304.3642              | 39.5829     | -47.3414   | 656151.2420 | -23.2737  |
| -23.2705              |             |            |             |           |
| [8423]ENERGY: 2890000 | 3142.7367   | 5162.2737  | 5276.2075   |           |
| 354.8350              | -15811.0865 | -1754.3176 | 0.0000      | 0.0000    |
| 7575.3925             | 3946.0414   | 303.0536   | -3629.3511  | 4004.4364 |
| 304.2929              | 95.7400     | -7.4502    | 656151.2420 | -23.1872  |
| -23.1874              |             |            |             |           |
| [8462]ENERGY: 2900000 | 3219.3661   | 5109.6922  | 5229.6222   |           |
| 325.1670              | -15789.8065 | -1740.0045 | 0.0000      | 0.0000    |
| 7592.5650             | 3946.6014   | 303.7406   | -3645.9636  | 4004.7395 |
| 304.2761              | -97.2347    | -121.7193  | 656151.2420 | -25.3448  |
| -25.3579              |             |            |             |           |
| [8512]ENERGY: 2910000 | 3157.5266   | 5162.6146  | 5295.8457   |           |
| 332.4922              | -15753.0171 | -1771.1948 | 0.0000      | 0.0000    |
| 7520.3560             | 3944.6232   | 300.8518   | -3575.7328  | 4005.0591 |
| 304.4839              | 13.1720     | 18.1564    | 656151.2420 | -22.2292  |

Supplementary Text 6

-22.2188  
 [8548]ENERGY: 2920000      3171.3089      5224.2457      5243.0699  
 358.7529      -15840.2378      -1799.7551      0.0000      0.0000  
 7587.0830      3944.4674      303.5213      -3642.6156      4005.0611  
 304.6044      151.7954      38.0286      656151.2420      -25.9874  
 -25.9876  
 [8598]ENERGY: 2930000      3128.0475      5121.6787      5265.7409  
 338.0178      -15793.9484      -1769.9579      0.0000      0.0000  
 7654.4885      3944.0671      306.2178      -3710.4215      4004.6565  
 304.7949      87.3450      5.4850      656151.2420      -21.5313  
 -21.5464  
 [8634]ENERGY: 2940000      3239.5991      5229.1966      5243.1191  
 335.0239      -15799.2715      -1901.6627      0.0000      0.0000  
 7602.6674      3948.6719      304.1447      -3653.9955      4005.1815  
 304.6016      -36.0834      -129.0893      656151.2420      -25.9267  
 -25.9192  
 [8684]ENERGY: 2950000      3235.4086      5137.0305      5301.9087  
 345.4041      -15829.9429      -1811.3068      0.0000      0.0000  
 7566.2456      3944.7477      302.6877      -3621.4979      4006.0155  
 304.6801      -44.6056      -110.0614      656151.2420      -22.5881  
 -22.5892  
 [8720]ENERGY: 2960000      3083.0649      5148.0275      5254.8404  
 348.3278      -15814.2348      -1747.1175      0.0000      0.0000  
 7668.6440      3941.5523      306.7841      -3727.0917      4004.5556  
 304.6340      -73.8493      7.9033      656151.2420      -18.1994  
 -18.1838  
 [8770]ENERGY: 2970000      3135.8677      5224.4857      5296.6328  
 345.9954      -15905.3113      -1750.5517      0.0000      0.0000  
 7594.1109      3941.2294      303.8024      -3652.8815      4003.8693  
 304.5384      3.5529      21.7688      656151.2420      -20.9048  
 -20.9167  
 [8806]ENERGY: 2980000      3157.2791      5128.6791      5259.0466  
 342.7465      -15802.1401      -1795.2120      0.0000      0.0000  
 7652.9000      3943.2991      306.1543      -3709.6009      4005.6849  
 304.5442      -10.4127      -115.1732      656151.2420      -21.8267  
 -21.8194  
 [8856]ENERGY: 2990000      3164.3028      5180.4661      5236.6191  
 321.6603      -15754.2819      -1853.6283      0.0000      0.0000  
 7645.2817      3940.4199      305.8495      -3704.8618      4004.4382  
 304.5397      -64.3728      -23.8583      656151.2420      -25.1738  
 -25.1848  
 [8895]ENERGY: 3000000      3134.8832      5218.4065      5259.6314  
 336.8943      -15933.9696      -1678.6961      0.0000      0.0000  
 7607.8932      3945.0430      304.3538      -3662.8502      4005.8767  
 304.7237      28.3086      -4.0991      656151.2420      -21.8323  
 -21.8199  
 [8945]ENERGY: 3010000      3160.6014      5219.2792      5242.7626  
 352.0568      -15750.5580      -1872.8142      0.0000      0.0000  
 7593.6617      3944.9896      303.7844      -3648.6721      4006.2033  
 304.7521      41.9357      -23.1044      656151.2420      -24.4170  
 -24.4231  
 [8981]ENERGY: 3020000      3188.4412      5165.6502      5238.9643  
 343.7717      -15812.6145      -1763.8886      0.0000      0.0000  
 7584.5025      3944.8268      303.4180      -3639.6756      4004.6680

## Supplementary Text 6

|                       |             |            |             |           |
|-----------------------|-------------|------------|-------------|-----------|
| 304.6855              | -61.1477    | -29.5183   | 656151.2420 | -23.6071  |
| -23.6029              |             |            |             |           |
| [9031]ENERGY: 3030000 | 3118.1301   | 5233.5350  | 5296.0174   |           |
| 319.8208              | -15831.6642 | -1790.7044 | 0.0000      | 0.0000    |
| 7599.7872             | 3944.9219   | 304.0295   | -3654.8654  | 4005.5882 |
| 304.8308              | 41.1903     | -17.0207   | 656151.2420 | -24.6970  |
| -24.7030              |             |            |             |           |
| [9067]ENERGY: 3040000 | 3096.9864   | 5229.3026  | 5246.4710   |           |
| 342.0724              | -15854.5073 | -1703.9873 | 0.0000      | 0.0000    |
| 7584.8251             | 3941.1629   | 303.4309   | -3643.6622  | 4004.1902 |
| 304.5336              | 99.1074     | 97.0211    | 656151.2420 | -26.9289  |
| -26.9247              |             |            |             |           |
| [9117]ENERGY: 3050000 | 3246.4243   | 5111.6412  | 5225.2778   |           |
| 339.5582              | -15803.5045 | -1766.0431 | 0.0000      | 0.0000    |
| 7590.7182             | 3944.0721   | 303.6667   | -3646.6460  | 4005.2672 |
| 304.7237              | 23.2243     | -43.0094   | 656151.2420 | -23.8052  |
| -23.8167              |             |            |             |           |
| [9153]ENERGY: 3060000 | 3174.7673   | 5149.3063  | 5302.3156   |           |
| 353.1017              | -15947.7908 | -1732.4740 | 0.0000      | 0.0000    |
| 7645.0015             | 3944.2276   | 305.8383   | -3700.7739  | 4005.3926 |
| 304.7286              | 89.8061     | 67.8715    | 656151.2420 | -23.6110  |
| -23.6002              |             |            |             |           |
| [9203]ENERGY: 3070000 | 3154.3175   | 5137.5228  | 5286.0394   |           |
| 335.8543              | -15825.1108 | -1758.2165 | 0.0000      | 0.0000    |
| 7615.1390             | 3945.5457   | 304.6436   | -3669.5933  | 4006.7130 |
| 304.7561              | 75.6916     | 76.4573    | 656151.2420 | -22.5864  |
| -22.5824              |             |            |             |           |
| [9239]ENERGY: 3080000 | 3177.2631   | 5185.7226  | 5302.8066   |           |
| 329.3244              | -15770.8535 | -1797.7688 | 0.0000      | 0.0000    |
| 7521.4593             | 3947.9536   | 300.8960   | -3573.5057  | 4007.2111 |
| 304.9450              | 194.7479    | 86.1940    | 656151.2420 | -26.6097  |
| -26.6051              |             |            |             |           |
| [9289]ENERGY: 3090000 | 3139.8538   | 5100.8445  | 5249.4423   |           |
| 344.8013              | -15740.1809 | -1832.4800 | 0.0000      | 0.0000    |
| 7679.1888             | 3941.4698   | 307.2059   | -3737.7190  | 4005.6519 |
| 304.7766              | -49.7189    | -1.9702    | 656151.2420 | -24.4381  |
| -24.4573              |             |            |             |           |
| [9328]ENERGY: 3100000 | 3178.8443   | 5189.6625  | 5303.9836   |           |
| 317.0634              | -15826.5679 | -1805.6753 | 0.0000      | 0.0000    |
| 7590.8948             | 3948.2053   | 303.6737   | -3642.6894  | 4006.4280 |
| 304.7536              | -128.3396   | -111.8829  | 656151.2420 | -29.2489  |
| -29.2248              |             |            |             |           |
| [9378]ENERGY: 3110000 | 3165.7764   | 5136.2601  | 5298.4335   |           |
| 358.2446              | -15797.5965 | -1814.5771 | 0.0000      | 0.0000    |
| 7600.3644             | 3946.9053   | 304.0526   | -3653.4590  | 4008.1170 |
| 304.9153              | 51.0842     | -52.4816   | 656151.2420 | -26.7779  |
| -26.7966              |             |            |             |           |
| [9414]ENERGY: 3120000 | 3185.7758   | 5194.0272  | 5252.5087   |           |
| 328.9333              | -15845.8815 | -1799.9562 | 0.0000      | 0.0000    |
| 7634.9323             | 3950.3396   | 305.4355   | -3684.5927  | 4008.4956 |
| 304.8288              | -79.8182    | -183.9699  | 656151.2420 | -21.9334  |
| -21.9440              |             |            |             |           |
| [9464]ENERGY: 3130000 | 3183.3332   | 5284.1825  | 5237.3966   |           |
| 327.5761              | -15852.2931 | -1857.3033 | 0.0000      | 0.0000    |

## Supplementary Text 6

|                       |             |            |             |           |
|-----------------------|-------------|------------|-------------|-----------|
| 7622.0028             | 3944.8948   | 304.9182   | -3677.1080  | 4008.3524 |
| 304.9616              | -38.7109    | -103.5909  | 656151.2420 | -24.2491  |
| -24.2359              |             |            |             |           |
| [9500]ENERGY: 3140000 | 3165.1707   | 5217.2269  | 5250.7474   |           |
| 346.2330              | -15899.5589 | -1753.8983 | 0.0000      | 0.0000    |
| 7619.5770             | 3945.4978   | 304.8212   | -3674.0792  | 4007.9060 |
| 304.9293              | -29.2321    | -154.3200  | 656151.2420 | -26.3119  |
| -26.3182              |             |            |             |           |
| [9550]ENERGY: 3150000 | 3144.7309   | 5203.9844  | 5260.1187   |           |
| 344.0903              | -15854.0794 | -1796.5988 | 0.0000      | 0.0000    |
| 7639.5243             | 3941.7704   | 305.6192   | -3697.7540  | 4007.0499 |
| 304.7647              | -164.4352   | -153.1108  | 656151.2420 | -27.0261  |
| -26.9929              |             |            |             |           |
| [9586]ENERGY: 3160000 | 3235.6689   | 5247.0547  | 5185.6083   |           |
| 322.8535              | -15860.1503 | -1777.1647 | 0.0000      | 0.0000    |
| 7594.0690             | 3947.9395   | 303.8007   | -3646.1295  | 4006.2314 |
| 304.6037              | -142.1366   | -112.7918  | 656151.2420 | -29.2882  |
| -29.3105              |             |            |             |           |
| [9636]ENERGY: 3170000 | 3198.0441   | 5243.6507  | 5284.4802   |           |
| 334.0814              | -15836.9503 | -1810.3701 | 0.0000      | 0.0000    |
| 7531.4647             | 3944.4008   | 301.2962   | -3587.0640  | 4006.6831 |
| 304.5232              | 90.7558     | 37.1497    | 656151.2420 | -24.1293  |
| -24.1179              |             |            |             |           |
| [9672]ENERGY: 3180000 | 3180.7526   | 5119.8725  | 5262.4255   |           |
| 332.8077              | -15883.0777 | -1765.5676 | 0.0000      | 0.0000    |
| 7693.9847             | 3941.1976   | 307.7979   | -3752.7871  | 4007.0935 |
| 304.6370              | 38.4466     | -107.1928  | 656151.2420 | -25.5664  |
| -25.5786              |             |            |             |           |
| [9722]ENERGY: 3190000 | 3238.4894   | 5061.5873  | 5311.0150   |           |
| 343.6035              | -15871.9998 | -1793.2911 | 0.0000      | 0.0000    |
| 7655.8868             | 3945.2909   | 306.2737   | -3710.5958  | 4005.6137 |
| 304.6532              | -178.9264   | -103.4353  | 656151.2420 | -27.0981  |
| -27.1043              |             |            |             |           |
| [9761]ENERGY: 3200000 | 3199.3614   | 5103.6825  | 5298.1455   |           |
| 353.1506              | -15841.3806 | -1774.1008 | 0.0000      | 0.0000    |
| 7606.8032             | 3945.6617   | 304.3102   | -3661.1414  | 4005.8987 |
| 304.7095              | -139.4935   | -183.5431  | 656151.2420 | -23.1241  |
| -23.1233              |             |            |             |           |
| [9811]ENERGY: 3210000 | 3186.8782   | 5229.1041  | 5274.2941   |           |
| 333.8472              | -15907.8704 | -1839.4734 | 0.0000      | 0.0000    |
| 7666.1732             | 3942.9529   | 306.6853   | -3723.2202  | 4006.7686 |
| 304.8118              | 74.3467     | 17.3690    | 656151.2420 | -27.2732  |
| -27.2651              |             |            |             |           |
| [9847]ENERGY: 3220000 | 3221.2561   | 5260.7358  | 5285.2020   |           |
| 326.1895              | -15860.9331 | -1821.1089 | 0.0000      | 0.0000    |
| 7530.8842             | 3942.2255   | 301.2730   | -3588.6587  | 4007.2295 |
| 304.6320              | -2.4615     | -73.6180   | 656151.2420 | -24.0299  |
| -24.0471              |             |            |             |           |
| [9897]ENERGY: 3230000 | 3200.8185   | 5241.0485  | 5246.1358   |           |
| 333.0345              | -15896.0442 | -1712.7870 | 0.0000      | 0.0000    |
| 7536.0702             | 3948.2763   | 301.4805   | -3587.7939  | 4006.6502 |
| 304.6340              | 152.1579    | 137.9109   | 656151.2420 | -23.4307  |
| -23.4204              |             |            |             |           |
| [9933]ENERGY: 3240000 | 3253.6599   | 5113.3045  | 5293.4881   |           |

## Supplementary Text 6

|                        |             |            |             |           |
|------------------------|-------------|------------|-------------|-----------|
| 334.6740               | -15865.8396 | -1787.6909 | 0.0000      | 0.0000    |
| 7605.8246              | 3947.4206   | 304.2710   | -3658.4040  | 4006.3715 |
| 304.5405               | -113.4530   | -110.8394  | 656151.2420 | -21.3567  |
| -21.3543               |             |            |             |           |
| [9983]ENERGY: 3250000  | 3168.1838   | 5227.8306  | 5233.4695   |           |
| 332.5047               | -15907.9518 | -1706.2517 | 0.0000      | 0.0000    |
| 7597.7752              | 3945.5604   | 303.9490   | -3652.2148  | 4006.7231 |
| 304.7118               | 96.1063     | 115.0356   | 656151.2420 | -21.5522  |
| -21.5554               |             |            |             |           |
| [10019]ENERGY: 3260000 | 3112.0844   | 5159.7506  | 5243.3749   |           |
| 322.0833               | -15757.6102 | -1783.3530 | 0.0000      | 0.0000    |
| 7646.9366              | 3943.2666   | 305.9157   | -3703.6699  | 4005.2764 |
| 304.8051               | -124.4262   | -136.9393  | 656151.2420 | -22.9045  |
| -22.9186               |             |            |             |           |
| [10069]ENERGY: 3270000 | 3164.5144   | 5178.0076  | 5228.2935   |           |
| 327.6079               | -15890.2177 | -1752.4348 | 0.0000      | 0.0000    |
| 7687.2109              | 3942.9817   | 307.5269   | -3744.2292  | 4007.0572 |
| 304.6227               | -94.3300    | -156.9853  | 656151.2420 | -20.2903  |
| -20.2787               |             |            |             |           |
| [10105]ENERGY: 3280000 | 3175.4142   | 5221.1777  | 5268.2460   |           |
| 339.8588               | -15885.5397 | -1761.1433 | 0.0000      | 0.0000    |
| 7587.9397              | 3945.9534   | 303.5555   | -3641.9863  | 4006.2696 |
| 304.6353               | -23.8081    | 28.1038    | 656151.2420 | -21.0002  |
| -20.9967               |             |            |             |           |
| [10155]ENERGY: 3290000 | 3246.3213   | 5219.4865  | 5269.5629   |           |
| 316.9740               | -15924.1886 | -1761.7533 | 0.0000      | 0.0000    |
| 7581.9564              | 3948.3593   | 303.3162   | -3633.5970  | 4007.3462 |
| 304.6175               | -57.9541    | -92.9896   | 656151.2420 | -23.7082  |
| -23.7112               |             |            |             |           |
| [10194]ENERGY: 3300000 | 3133.1179   | 5051.5968  | 5315.9260   |           |
| 342.0013               | -15834.4440 | -1726.7471 | 0.0000      | 0.0000    |
| 7663.4259              | 3944.8769   | 306.5754   | -3718.5490  | 4007.2865 |
| 304.7741               | 213.5900    | 92.4480    | 656151.2420 | -25.6824  |
| -25.6751               |             |            |             |           |
| [10244]ENERGY: 3310000 | 3199.5269   | 5108.7088  | 5250.1398   |           |
| 330.2078               | -15775.6288 | -1804.7937 | 0.0000      | 0.0000    |
| 7638.3377              | 3946.4985   | 305.5717   | -3691.8392  | 4008.6767 |
| 304.7940               | -134.6758   | -151.7494  | 656151.2420 | -25.4215  |
| -25.4190               |             |            |             |           |
| [10280]ENERGY: 3320000 | 3143.7249   | 5228.3548  | 5306.5680   |           |
| 331.2686               | -15841.0423 | -1803.7352 | 0.0000      | 0.0000    |
| 7583.3640              | 3948.5028   | 303.3725   | -3634.8612  | 4007.5476 |
| 304.6377               | -129.9734   | -48.9135   | 656151.2420 | -26.1415  |
| -26.1380               |             |            |             |           |
| [10330]ENERGY: 3330000 | 3201.4000   | 5267.4281  | 5247.3408   |           |
| 337.1759               | -15887.1021 | -1752.6214 | 0.0000      | 0.0000    |
| 7538.3283              | 3951.9496   | 301.5708   | -3586.3788  | 4008.6210 |
| 304.6275               | 123.4768    | 58.2434    | 656151.2420 | -25.6319  |
| -25.6329               |             |            |             |           |
| [10366]ENERGY: 3340000 | 3211.2329   | 5153.4024  | 5267.5300   |           |
| 356.9288               | -15868.1571 | -1783.6919 | 0.0000      | 0.0000    |
| 7611.7107              | 3948.9558   | 304.5065   | -3662.7549  | 4010.6310 |
| 304.8447               | 142.7883    | 59.0070    | 656151.2420 | -24.4572  |
| -24.4626               |             |            |             |           |



## Supplementary Text 6

|                        |             |            |             |           |
|------------------------|-------------|------------|-------------|-----------|
| [10416]ENERGY: 3350000 | 3191.7153   | 5172.2980  | 5307.5036   |           |
| 348.1545               | -15846.9908 | -1759.4996 | 0.0000      | 0.0000    |
| 7535.5981              | 3948.7791   | 301.4616   | -3586.8190  | 4009.8554 |
| 304.7870               | 28.3539     | 7.6518     | 656151.2420 | -23.2244  |
| -23.2256               |             |            |             |           |
| [10452]ENERGY: 3360000 | 3100.4563   | 5211.6233  | 5362.3867   |           |
| 328.8132               | -15978.6014 | -1734.2919 | 0.0000      | 0.0000    |
| 7656.3789              | 3946.7652   | 306.2934   | -3709.6137  | 4009.6310 |
| 304.8954               | 93.1828     | 91.7249    | 656151.2420 | -23.2821  |
| -23.2719               |             |            |             |           |
| [10502]ENERGY: 3370000 | 3102.4889   | 5176.3252  | 5299.2758   |           |
| 340.3344               | -15854.7815 | -1823.6136 | 0.0000      | 0.0000    |
| 7704.6580              | 3944.6872   | 308.2248   | -3759.9708  | 4009.8871 |
| 304.7876               | -58.5374    | -70.5165   | 656151.2420 | -23.4122  |
| -23.4222               |             |            |             |           |
| [10538]ENERGY: 3380000 | 3154.8644   | 5205.3172  | 5269.4461   |           |
| 339.8188               | -15899.9482 | -1765.1369 | 0.0000      | 0.0000    |
| 7640.8505              | 3945.2120   | 305.6722   | -3695.6385  | 4009.6204 |
| 304.7874               | -65.4875    | -145.4016  | 656151.2420 | -24.6604  |
| -24.6530               |             |            |             |           |
| [10588]ENERGY: 3390000 | 3222.9221   | 5205.2905  | 5310.3416   |           |
| 353.2767               | -15953.9286 | -1778.2093 | 0.0000      | 0.0000    |
| 7592.6424              | 3952.3353   | 303.7437   | -3640.3071  | 4010.6761 |
| 304.8748               | -159.2000   | -162.4692  | 656151.2420 | -25.0944  |
| -25.1047               |             |            |             |           |
| [10627]ENERGY: 3400000 | 3148.6597   | 5071.3391  | 5315.3722   |           |
| 328.5976               | -15864.9027 | -1773.1182 | 0.0000      | 0.0000    |
| 7718.4775              | 3944.4253   | 308.7777   | -3774.0522  | 4008.7858 |
| 305.0049               | -142.9050   | -89.9778   | 656151.2420 | -22.7292  |
| -22.7133               |             |            |             |           |
| [10677]ENERGY: 3410000 | 3229.2770   | 5279.9478  | 5314.6594   |           |
| 329.7950               | -15963.3842 | -1848.9180 | 0.0000      | 0.0000    |
| 7609.0119              | 3950.3890   | 304.3985   | -3658.6230  | 4009.5910 |
| 304.8351               | -27.4081    | -114.6887  | 656151.2420 | -25.6456  |
| -25.6638               |             |            |             |           |
| [10713]ENERGY: 3420000 | 3245.8238   | 5153.2176  | 5290.4678   |           |
| 334.5944               | -15864.4863 | -1847.0275 | 0.0000      | 0.0000    |
| 7637.8078              | 3950.3976   | 305.5505   | -3687.4102  | 4009.9920 |
| 304.9236               | -91.3464    | -76.9961   | 656151.2420 | -23.1424  |
| -23.1523               |             |            |             |           |
| [10763]ENERGY: 3430000 | 3151.6478   | 5201.7317  | 5330.0656   |           |
| 335.1852               | -15877.7817 | -1791.4409 | 0.0000      | 0.0000    |
| 7600.1343              | 3949.5420   | 304.0434   | -3650.5922  | 4011.3478 |
| 304.8726               | 3.5570      | -62.3860   | 656151.2420 | -24.6222  |
| -24.6039               |             |            |             |           |
| [10799]ENERGY: 3440000 | 3206.0308   | 5173.6959  | 5285.2724   |           |
| 338.5517               | -15804.6550 | -1777.0207 | 0.0000      | 0.0000    |
| 7531.2701              | 3953.1452   | 301.2885   | -3578.1250  | 4010.5073 |
| 304.9236               | -41.6953    | 19.2912    | 656151.2420 | -25.7161  |
| -25.7199               |             |            |             |           |
| [10849]ENERGY: 3450000 | 3118.9282   | 5212.6045  | 5271.2457   |           |
| 329.0351               | -15798.4518 | -1780.5629 | 0.0000      | 0.0000    |
| 7596.5526              | 3949.3515   | 303.9001   | -3647.2012  | 4010.2879 |
| 304.8226               | -110.8613   | -102.6489  | 656151.2420 | -26.2817  |

Supplementary Text 6

-26.2849  
 [10885]ENERGY: 3460000      3196.0325      5182.5546      5280.4784  
 313.0168      -15874.5547      -1791.4095      0.0000      0.0000  
 7642.6902      3948.8082      305.7458      -3693.8820      4011.6488  
 304.8839      -57.2467      -90.5788      656151.2420      -20.2933  
 -20.2926  
 [10935]ENERGY: 3470000      3070.8192      5190.0266      5262.1773  
 352.5509      -15868.5947      -1704.7449      0.0000      0.0000  
 7646.9679      3949.2022      305.9169      -3697.7657      4010.7904  
 304.9135      36.8738      24.5097      656151.2420      -26.1565  
 -26.1554  
 [10971]ENERGY: 3480000      3193.5871      5237.7159      5294.6754  
 341.0375      -15798.5923      -1850.2861      0.0000      0.0000  
 7532.8151      3950.9526      301.3503      -3581.8625      4012.0080  
 304.8387      21.4843      -32.1455      656151.2420      -24.4770  
 -24.4759  
 [11021]ENERGY: 3490000      3140.0847      5213.8273      5280.7368  
 348.5295      -15872.2044      -1764.0952      0.0000      0.0000  
 7603.1253      3950.0039      304.1630      -3653.1214      4011.9374  
 304.8088      118.0830      67.8290      656151.2420      -21.0388  
 -21.0589  
 [11060]ENERGY: 3500000      3215.4277      5262.6977      5258.2094  
 327.7490      -15925.2034      -1799.9111      0.0000      0.0000  
 7610.4094      3949.3787      304.4544      -3661.0307      4010.4846  
 304.9300      -110.4228      -117.1267      656151.2420      -22.6301  
 -22.6164  
 [11110]ENERGY: 3510000      3186.3934      5261.8392      5258.0736  
 364.2002      -15782.5515      -1830.9260      0.0000      0.0000  
 7492.1325      3949.1615      299.7228      -3542.9710      4011.7868  
 305.0948      119.6226      19.8642      656151.2420      -21.9382  
 -21.9316  
 [11146]ENERGY: 3520000      3089.4350      5151.5335      5267.0387  
 339.3332      -15815.9194      -1735.7255      0.0000      0.0000  
 7651.8294      3947.5249      306.1114      -3704.3045      4010.6450  
 304.9075      -1.1636      5.7136      656151.2420      -22.7296  
 -22.7380  
 [11196]ENERGY: 3530000      3169.5367      5211.1948      5274.4145  
 333.3687      -15880.7190      -1695.5761      0.0000      0.0000  
 7538.6551      3950.8747      301.5839      -3587.7805      4011.4396  
 304.8658      -76.9209      -64.9111      656151.2420      -21.9151  
 -21.8928  
 [11232]ENERGY: 3540000      3129.7012      5244.6959      5256.7530  
 348.6401      -15867.9690      -1773.2188      0.0000      0.0000  
 7611.4175      3950.0200      304.4948      -3661.3975      4011.8839  
 305.0847      102.2571      93.0183      656151.2420      -22.4005  
 -22.4174  
 [11282]ENERGY: 3550000      3254.1771      5141.8475      5252.5814  
 325.1177      -15950.1410      -1697.1408      0.0000      0.0000  
 7622.9220      3949.3639      304.9550      -3673.5581      4012.1770  
 305.1836      0.3768      26.8386      656151.2420      -20.9134  
 -20.9193  
 [11318]ENERGY: 3560000      3204.7030      5142.0468      5286.0630  
 351.5160      -15858.4695      -1784.5527      0.0000      0.0000  
 7608.9562      3950.2627      304.3963      -3658.6935      4012.5115

## Supplementary Text 6

|                        |             |            |             |           |
|------------------------|-------------|------------|-------------|-----------|
| 304.9536               | 73.9599     | -65.4294   | 656151.2420 | -28.1095  |
| -28.1054               |             |            |             |           |
| [11368]ENERGY: 3570000 | 3198.1810   | 5142.0409  | 5262.9387   |           |
| 335.7735               | -15850.9649 | -1766.5980 | 0.0000      | 0.0000    |
| 7627.6569              | 3949.0280   | 305.1444   | -3678.6289  | 4012.3408 |
| 304.8543               | -15.4237    | -41.7553   | 656151.2420 | -23.4985  |
| -23.4935               |             |            |             |           |
| [11404]ENERGY: 3580000 | 3229.7754   | 5191.2833  | 5271.6390   |           |
| 327.5126               | -15933.3991 | -1755.0347 | 0.0000      | 0.0000    |
| 7624.4720              | 3956.2484   | 305.0170   | -3668.2235  | 4013.3764 |
| 305.0052               | 97.6417     | 18.1163    | 656151.2420 | -19.5242  |
| -19.5351               |             |            |             |           |
| [11454]ENERGY: 3590000 | 3162.9093   | 5126.5403  | 5233.5486   |           |
| 331.7409               | -15862.8184 | -1750.6898 | 0.0000      | 0.0000    |
| 7705.8133              | 3947.0442   | 308.2711   | -3758.7691  | 4013.3132 |
| 304.9589               | 118.2450    | 116.3172   | 656151.2420 | -25.1307  |
| -25.1218               |             |            |             |           |
| [11493]ENERGY: 3600000 | 3188.1887   | 5170.0250  | 5322.7564   |           |
| 351.4749               | -15838.9882 | -1821.6936 | 0.0000      | 0.0000    |
| 7581.5576              | 3953.3208   | 303.3002   | -3628.2368  | 4014.6553 |
| 304.9934               | -24.9083    | -72.1294   | 656151.2420 | -21.5128  |
| -21.5208               |             |            |             |           |
| [11543]ENERGY: 3610000 | 3136.4806   | 5194.9279  | 5280.5227   |           |
| 311.0070               | -15953.8992 | -1703.3130 | 0.0000      | 0.0000    |
| 7685.4273              | 3951.1533   | 307.4555   | -3734.2740  | 4012.4664 |
| 305.0963               | 45.6127     | 60.9749    | 656151.2420 | -23.5312  |
| -23.5143               |             |            |             |           |
| [11579]ENERGY: 3620000 | 3243.1799   | 5119.8998  | 5284.2723   |           |
| 329.5615               | -15896.9838 | -1782.0181 | 0.0000      | 0.0000    |
| 7652.7264              | 3950.6379   | 306.1473   | -3702.0886  | 4013.2925 |
| 305.1877               | -67.2957    | -65.9414   | 656151.2420 | -25.2929  |
| -25.2951               |             |            |             |           |
| [11629]ENERGY: 3630000 | 3243.9541   | 5098.5588  | 5313.9313   |           |
| 342.2223               | -15939.2026 | -1792.2885 | 0.0000      | 0.0000    |
| 7685.4989              | 3952.6743   | 307.4584   | -3732.8246  | 4014.0823 |
| 305.1825               | 87.8293     | 83.8989    | 656151.2420 | -22.5587  |
| -22.5486               |             |            |             |           |
| [11665]ENERGY: 3640000 | 3168.1499   | 5286.6139  | 5224.6736   |           |
| 357.9339               | -15939.8739 | -1734.9915 | 0.0000      | 0.0000    |
| 7591.4967              | 3954.0026   | 303.6978   | -3637.4941  | 4013.5048 |
| 305.3055               | -65.8853    | -31.7532   | 656151.2420 | -22.0365  |
| -22.0486               |             |            |             |           |
| [11715]ENERGY: 3650000 | 3177.4733   | 5164.5245  | 5315.5585   |           |
| 316.9503               | -15905.0433 | -1732.9695 | 0.0000      | 0.0000    |
| 7614.8293              | 3951.3230   | 304.6312   | -3663.5063  | 4013.8864 |
| 305.2291               | 122.3795    | 43.0883    | 656151.2420 | -28.5372  |
| -28.5325               |             |            |             |           |
| [11751]ENERGY: 3660000 | 3201.4129   | 5222.9660  | 5225.3574   |           |
| 351.7784               | -15906.2126 | -1803.3285 | 0.0000      | 0.0000    |
| 7660.5255              | 3952.4991   | 306.4593   | -3708.0264  | 4013.8526 |
| 305.2887               | 12.5616     | 15.9974    | 656151.2420 | -23.7531  |
| -23.7595               |             |            |             |           |
| [11801]ENERGY: 3670000 | 3116.1193   | 5298.6224  | 5289.8523   |           |
| 346.9931               | -15948.7819 | -1779.5987 | 0.0000      | 0.0000    |

## Supplementary Text 6

|                        |             |            |             |           |
|------------------------|-------------|------------|-------------|-----------|
| 7627.0406              | 3950.2471   | 305.1198   | -3676.7935  | 4013.6733 |
| 305.1452               | 69.6024     | 19.4553    | 656151.2420 | -26.4411  |
| -26.4228               |             |            |             |           |
| [11837]ENERGY: 3680000 | 3133.2257   | 5205.3648  | 5279.0913   |           |
| 346.5340               | -15874.0178 | -1779.3833 | 0.0000      | 0.0000    |
| 7642.5369              | 3953.3516   | 305.7397   | -3689.1853  | 4014.1330 |
| 305.0425               | 135.0214    | 43.0358    | 656151.2420 | -20.9252  |
| -20.9639               |             |            |             |           |
| [11887]ENERGY: 3690000 | 3172.7073   | 5138.5710  | 5292.9352   |           |
| 341.0185               | -15908.8021 | -1761.8097 | 0.0000      | 0.0000    |
| 7675.8809              | 3950.5011   | 307.0736   | -3725.3798  | 4012.6064 |
| 305.0869               | 33.5700     | -6.4664    | 656151.2420 | -24.8773  |
| -24.8535               |             |            |             |           |
| [11926]ENERGY: 3700000 | 3140.5403   | 5267.5273  | 5257.7518   |           |
| 337.5003               | -15856.9215 | -1790.7619 | 0.0000      | 0.0000    |
| 7596.3033              | 3951.9395   | 303.8901   | -3644.3638  | 4013.3863 |
| 305.0870               | -37.4603    | -45.7591   | 656151.2420 | -19.4805  |
| -19.4888               |             |            |             |           |
| [11976]ENERGY: 3710000 | 3171.4960   | 5232.7336  | 5284.8061   |           |
| 337.3919               | -15885.3162 | -1772.3860 | 0.0000      | 0.0000    |
| 7585.6759              | 3954.4012   | 303.4650   | -3631.2746  | 4013.9343 |
| 305.3078               | 104.8961    | 34.0208    | 656151.2420 | -20.4593  |
| -20.4563               |             |            |             |           |
| [12012]ENERGY: 3720000 | 3138.4457   | 5136.5224  | 5238.8080   |           |
| 315.1905               | -15808.2692 | -1731.9834 | 0.0000      | 0.0000    |
| 7665.0673              | 3953.7814   | 306.6410   | -3711.2859  | 4014.0625 |
| 305.2493               | 71.6070     | -43.3902   | 656151.2420 | -25.6126  |
| -25.6156               |             |            |             |           |
| [12062]ENERGY: 3730000 | 3045.0822   | 5158.5687  | 5251.5121   |           |
| 348.8245               | -15768.9604 | -1681.6255 | 0.0000      | 0.0000    |
| 7596.7049              | 3950.1064   | 303.9062   | -3646.5985  | 4013.3388 |
| 305.1047               | 210.8950    | 197.0839   | 656151.2420 | -21.9930  |
| -22.0027               |             |            |             |           |
| [12098]ENERGY: 3740000 | 3173.5014   | 5179.4875  | 5306.9346   |           |
| 347.7274               | -15955.0589 | -1748.3292 | 0.0000      | 0.0000    |
| 7649.1006              | 3953.3634   | 306.0023   | -3695.7372  | 4013.0807 |
| 305.0920               | -152.7809   | -109.9089  | 656151.2420 | -22.1802  |
| -22.1543               |             |            |             |           |
| [12148]ENERGY: 3750000 | 3172.4988   | 5092.8606  | 5334.7514   |           |
| 335.0576               | -15849.8080 | -1696.0877 | 0.0000      | 0.0000    |
| 7565.8312              | 3955.1039   | 302.6711   | -3610.7273  | 4012.9059 |
| 304.9482               | 22.2979     | -42.3246   | 656151.2420 | -21.1047  |
| -21.1159               |             |            |             |           |
| [12184]ENERGY: 3760000 | 3161.6001   | 5172.2245  | 5309.0368   |           |
| 335.8349               | -15870.9809 | -1741.0532 | 0.0000      | 0.0000    |
| 7590.1051              | 3956.7673   | 303.6422   | -3633.3377  | 4013.7555 |
| 305.0553               | -48.5573    | 29.7745    | 656151.2420 | -23.1078  |
| -23.0939               |             |            |             |           |
| [12234]ENERGY: 3770000 | 3099.3442   | 5150.8515  | 5256.4378   |           |
| 340.1999               | -15781.2300 | -1756.8454 | 0.0000      | 0.0000    |
| 7644.4510              | 3953.2089   | 305.8163   | -3691.2420  | 4014.8675 |
| 305.1522               | -29.6025    | -61.7773   | 656151.2420 | -18.1679  |
| -18.1889               |             |            |             |           |
| [12270]ENERGY: 3780000 | 3091.6106   | 5243.0499  | 5247.6790   |           |

## Supplementary Text 6

|                        |             |            |             |           |
|------------------------|-------------|------------|-------------|-----------|
| 321.3351               | -15837.1982 | -1714.3735 | 0.0000      | 0.0000    |
| 7601.7945              | 3953.8974   | 304.1098   | -3647.8971  | 4015.4721 |
| 305.0889               | 132.6997    | 96.5182    | 656151.2420 | -23.5301  |
| -23.5326               |             |            |             |           |
| [12320]ENERGY: 3790000 | 3118.3790   | 5197.7707  | 5270.0540   |           |
| 351.0138               | -15870.9816 | -1783.1182 | 0.0000      | 0.0000    |
| 7666.2111              | 3949.3288   | 306.6868   | -3716.8823  | 4016.0379 |
| 305.2733               | -7.6614     | 4.0590     | 656151.2420 | -17.8985  |
| -17.8848               |             |            |             |           |
| [12359]ENERGY: 3800000 | 3104.6295   | 5182.7037  | 5271.7213   |           |
| 334.4531               | -15893.8774 | -1694.9587 | 0.0000      | 0.0000    |
| 7647.8172              | 3952.4889   | 305.9509   | -3695.3283  | 4016.1351 |
| 305.2654               | 154.3647    | 106.4511   | 656151.2420 | -21.3178  |
| -21.3168               |             |            |             |           |
| [12409]ENERGY: 3810000 | 3133.2983   | 5183.9170  | 5250.9269   |           |
| 346.3604               | -15799.8546 | -1846.4964 | 0.0000      | 0.0000    |
| 7684.1381              | 3952.2897   | 307.4039   | -3731.8484  | 4016.6390 |
| 305.1151               | -17.3534    | -93.7801   | 656151.2420 | -19.3496  |
| -19.3518               |             |            |             |           |
| [12445]ENERGY: 3820000 | 3205.4945   | 5245.2367  | 5245.5330   |           |
| 317.7390               | -15850.4387 | -1778.7551 | 0.0000      | 0.0000    |
| 7573.1768              | 3957.9863   | 302.9649   | -3615.1905  | 4016.2682 |
| 305.1487               | -83.9633    | -126.1854  | 656151.2420 | -29.1750  |
| -29.1741               |             |            |             |           |
| [12495]ENERGY: 3830000 | 3157.8717   | 5189.5507  | 5280.9725   |           |
| 338.4176               | -15928.7130 | -1773.2969 | 0.0000      | 0.0000    |
| 7687.1086              | 3951.9112   | 307.5228   | -3735.1974  | 4015.8416 |
| 305.3001               | 103.7699    | -4.2192    | 656151.2420 | -20.4267  |
| -20.4399               |             |            |             |           |
| [12531]ENERGY: 3840000 | 3275.4753   | 5193.9284  | 5267.3615   |           |
| 351.3041               | -15911.8849 | -1802.9655 | 0.0000      | 0.0000    |
| 7583.1339              | 3956.3529   | 303.3633   | -3626.7811  | 4015.2350 |
| 305.3112               | -123.2069   | -102.1322  | 656151.2420 | -24.3390  |
| -24.3303               |             |            |             |           |
| [12581]ENERGY: 3850000 | 3174.2384   | 5117.3768  | 5308.5153   |           |
| 340.3030               | -15846.5553 | -1796.2366 | 0.0000      | 0.0000    |
| 7655.6372              | 3953.2787   | 306.2638   | -3702.3584  | 4015.8606 |
| 305.1292               | 43.0354     | -50.1769   | 656151.2420 | -25.1349  |
| -25.1292               |             |            |             |           |
| [12617]ENERGY: 3860000 | 3160.9164   | 5142.6924  | 5284.2284   |           |
| 343.1094               | -15798.7975 | -1745.9964 | 0.0000      | 0.0000    |
| 7567.7711              | 3953.9238   | 302.7487   | -3613.8473  | 4015.8795 |
| 305.1558               | 5.3493      | -42.2557   | 656151.2420 | -22.7198  |
| -22.7230               |             |            |             |           |
| [12667]ENERGY: 3870000 | 3219.6701   | 5181.3342  | 5269.0398   |           |
| 341.1165               | -15817.0889 | -1783.1441 | 0.0000      | 0.0000    |
| 7546.7102              | 3957.6378   | 301.9061   | -3589.0724  | 4015.9500 |
| 305.1167               | -98.8794    | -71.5335   | 656151.2420 | -23.5808  |
| -23.5766               |             |            |             |           |
| [12703]ENERGY: 3880000 | 3266.4580   | 5040.3031  | 5232.2524   |           |
| 335.6071               | -15793.4490 | -1740.3653 | 0.0000      | 0.0000    |
| 7615.3555              | 3956.1620   | 304.6523   | -3659.1935  | 4017.2077 |
| 305.0718               | 24.6515     | -103.7677  | 656151.2420 | -24.3472  |
| -24.3540               |             |            |             |           |

## Supplementary Text 6

|                        |             |            |             |           |
|------------------------|-------------|------------|-------------|-----------|
| [12753]ENERGY: 3890000 | 3221.5593   | 5175.3946  | 5248.2804   |           |
| 331.1931               | -15914.5392 | -1674.2342 | 0.0000      | 0.0000    |
| 7569.4233              | 3957.0773   | 302.8148   | -3612.3460  | 4016.4471 |
| 305.0170               | -26.0319    | 36.8312    | 656151.2420 | -27.5453  |
| -27.5721               |             |            |             |           |
| [12792]ENERGY: 3900000 | 3161.6369   | 5119.3812  | 5263.8906   |           |
| 337.2594               | -15833.5521 | -1751.7730 | 0.0000      | 0.0000    |
| 7657.9686              | 3954.8116   | 306.3570   | -3703.1570  | 4016.8931 |
| 305.0447               | 52.1731     | 62.1634    | 656151.2420 | -22.3505  |
| -22.3229               |             |            |             |           |
| [12842]ENERGY: 3910000 | 3127.3490   | 5176.5518  | 5283.7259   |           |
| 336.2066               | -15848.5881 | -1787.0592 | 0.0000      | 0.0000    |
| 7665.9031              | 3954.0891   | 306.6745   | -3711.8140  | 4018.0666 |
| 305.0159               | 85.5833     | 18.7972    | 656151.2420 | -22.0133  |
| -22.0187               |             |            |             |           |
| [12878]ENERGY: 3920000 | 3197.3787   | 5097.3175  | 5275.6028   |           |
| 351.6359               | -15853.9675 | -1747.5616 | 0.0000      | 0.0000    |
| 7634.9603              | 3955.3662   | 305.4366   | -3679.5942  | 4016.8436 |
| 305.0314               | -44.1471    | -7.5048    | 656151.2420 | -25.6810  |
| -25.6775               |             |            |             |           |
| [12928]ENERGY: 3930000 | 3190.1671   | 5170.3612  | 5320.4352   |           |
| 337.5447               | -15861.5129 | -1826.2522 | 0.0000      | 0.0000    |
| 7624.2309              | 3954.9738   | 305.0074   | -3669.2570  | 4017.1180 |
| 305.1570               | -70.0463    | -102.4436  | 656151.2420 | -20.5601  |
| -20.5548               |             |            |             |           |
| [12964]ENERGY: 3940000 | 3145.2685   | 5216.2490  | 5291.1659   |           |
| 323.9578               | -15880.9529 | -1789.5789 | 0.0000      | 0.0000    |
| 7648.5654              | 3954.6748   | 305.9809   | -3693.8906  | 4017.9061 |
| 305.0372               | -186.7507   | -126.3660  | 656151.2420 | -24.9940  |
| -24.9974               |             |            |             |           |
| [13014]ENERGY: 3950000 | 3208.4917   | 5179.6520  | 5264.8735   |           |
| 320.8165               | -15841.9556 | -1755.8209 | 0.0000      | 0.0000    |
| 7579.2847              | 3955.3419   | 303.2093   | -3623.9428  | 4017.1069 |
| 305.1341               | 80.7037     | -2.7502    | 656151.2420 | -22.1382  |
| -22.1363               |             |            |             |           |
| [13050]ENERGY: 3960000 | 3205.8050   | 5184.5238  | 5278.3246   |           |
| 360.7207               | -15996.4069 | -1614.0156 | 0.0000      | 0.0000    |
| 7538.9482              | 3957.8996   | 301.5956   | -3581.0486  | 4016.0559 |
| 304.9834               | 157.4051    | 101.8814   | 656151.2420 | -23.3545  |
| -23.3557               |             |            |             |           |
| [13100]ENERGY: 3970000 | 3192.0590   | 5179.7271  | 5262.3803   |           |
| 350.9218               | -15855.8974 | -1791.9588 | 0.0000      | 0.0000    |
| 7620.1486              | 3957.3806   | 304.8440   | -3662.7680  | 4018.4927 |
| 305.0927               | -86.8390    | -147.9947  | 656151.2420 | -22.1089  |
| -22.1215               |             |            |             |           |
| [13136]ENERGY: 3980000 | 3120.9497   | 5135.0969  | 5309.2973   |           |
| 350.6304               | -15824.6217 | -1786.7658 | 0.0000      | 0.0000    |
| 7652.5856              | 3957.1724   | 306.1417   | -3695.4132  | 4018.3093 |
| 305.2343               | 61.6223     | 77.7593    | 656151.2420 | -22.5401  |
| -22.5195               |             |            |             |           |
| [13186]ENERGY: 3990000 | 3179.9200   | 5245.2081  | 5254.4577   |           |
| 340.1201               | -15865.3150 | -1838.9403 | 0.0000      | 0.0000    |
| 7640.2858              | 3955.7364   | 305.6496   | -3684.5494  | 4018.0248 |
| 305.2818               | -72.0715    | -41.7631   | 656151.2420 | -25.1200  |

Supplementary Text 6

-25.1376  
 [13225]ENERGY: 4000000 3167.8008 5222.7417 5274.7997  
 346.2924 -15898.0437 -1726.0043 0.0000 0.0000  
 7568.6775 3956.2642 302.7849 -3612.4133 4017.6939  
 305.4209 -14.3113 23.2625 656151.2420 -19.4503  
 -19.4473  
 [13275]ENERGY: 4010000 3190.6770 5198.6286 5269.4093  
 335.6620 -15854.2769 -1766.4765 0.0000 0.0000  
 7583.5386 3957.1621 303.3795 -3626.3765 4017.2719  
 305.3147 -31.4998 -96.9843 656151.2420 -25.0943  
 -25.1070  
 [13311]ENERGY: 4020000 3161.0259 5105.5176 5254.0731  
 316.6770 -15800.2637 -1789.7266 0.0000 0.0000  
 7707.6667 3954.9700 308.3452 -3752.6967 4018.2383  
 305.3866 102.1304 29.2000 656151.2420 -25.5666  
 -25.5380  
 [13361]ENERGY: 4030000 3183.5406 5199.4676 5298.6119  
 344.1985 -15889.9646 -1793.4245 0.0000 0.0000  
 7613.1771 3955.6065 304.5651 -3657.5705 4018.4687  
 305.3911 26.2078 0.8916 656151.2420 -26.0630  
 -26.0784  
 [13397]ENERGY: 4040000 3206.7567 5042.4134 5294.9369  
 312.9182 -15851.5118 -1755.7421 0.0000 0.0000  
 7705.3349 3955.1062 308.2519 -3750.2287 4017.1808  
 305.4258 -123.1013 -114.5448 656151.2420 -22.5797  
 -22.5862  
 [13447]ENERGY: 4050000 3153.2606 5211.9604 5292.4447  
 321.8313 -15895.1310 -1753.8860 0.0000 0.0000  
 7626.4110 3956.8910 305.0946 -3669.5200 4019.2951  
 305.3041 50.1520 -18.4557 656151.2420 -24.7638  
 -24.7536  
 [13483]ENERGY: 4060000 3146.5599 5122.5572 5249.8801  
 336.6324 -15740.7419 -1747.1331 0.0000 0.0000  
 7588.2087 3955.9631 303.5663 -3632.2455 4017.7876  
 305.4803 -18.9219 -89.3951 656151.2420 -25.5771  
 -25.5864  
 [13533]ENERGY: 4070000 3201.4888 5165.3202 5268.2097  
 315.6432 -15781.8056 -1781.1014 0.0000 0.0000  
 7570.6856 3958.4405 302.8653 -3612.2451 4019.7717  
 305.5119 6.9574 -7.5424 656151.2420 -20.9055  
 -20.8810  
 [13569]ENERGY: 4080000 3266.4747 5171.3457 5225.5270  
 336.5059 -15848.6387 -1799.8207 0.0000 0.0000  
 7608.0770 3959.4710 304.3611 -3648.6060 4019.3276  
 305.5403 -69.0993 -84.4711 656151.2420 -27.2206  
 -27.2363  
 [13619]ENERGY: 4090000 3178.7956 5107.3239 5245.4400  
 366.5555 -15793.1599 -1752.3005 0.0000 0.0000  
 7610.2286 3962.8832 304.4472 -3647.3454 4022.5742  
 305.5274 85.4737 39.0394 656151.2420 -21.1271  
 -21.1146  
 [13658]ENERGY: 4100000 3112.2143 5181.0111 5261.4755  
 322.1193 -15811.0756 -1762.2844 0.0000 0.0000  
 7655.0868 3958.5470 306.2417 -3696.5398 4022.1269

## Supplementary Text 6

|                        |             |            |             |           |
|------------------------|-------------|------------|-------------|-----------|
| 305.4684               | 92.7951     | 61.1640    | 656151.2420 | -24.4748  |
| -24.4823               |             |            |             |           |
| [13708]ENERGY: 4110000 | 3175.7578   | 5152.4186  | 5301.9946   |           |
| 351.4052               | -15849.6436 | -1793.8435 | 0.0000      | 0.0000    |
| 7620.0278              | 3958.1169   | 304.8392   | -3661.9109  | 4022.6237 |
| 305.4236               | -8.0261     | -71.3964   | 656151.2420 | -20.2678  |
| -20.2737               |             |            |             |           |
| [13744]ENERGY: 4120000 | 3153.1076   | 5176.8270  | 5234.8508   |           |
| 340.1033               | -15782.9480 | -1792.0288 | 0.0000      | 0.0000    |
| 7629.7249              | 3959.6367   | 305.2271   | -3670.0882  | 4021.6190 |
| 305.5466               | -66.3156    | -45.8755   | 656151.2420 | -19.9474  |
| -19.9386               |             |            |             |           |
| [13794]ENERGY: 4130000 | 3168.8081   | 5116.4948  | 5271.1898   |           |
| 329.7410               | -15896.4781 | -1732.2002 | 0.0000      | 0.0000    |
| 7701.3130              | 3958.8683   | 308.0910   | -3742.4448  | 4022.5444 |
| 305.2788               | 93.7234     | 0.6597     | 656151.2420 | -20.6411  |
| -20.6536               |             |            |             |           |
| [13830]ENERGY: 4140000 | 3178.8165   | 5212.0801  | 5264.7010   |           |
| 341.3266               | -15799.5069 | -1808.6227 | 0.0000      | 0.0000    |
| 7573.8297              | 3962.6242   | 302.9911   | -3611.2055  | 4022.7004 |
| 305.4165               | 97.4526     | 61.3084    | 656151.2420 | -21.0871  |
| -21.0737               |             |            |             |           |
| [13880]ENERGY: 4150000 | 3197.8541   | 5057.2448  | 5333.4350   |           |
| 332.6281               | -15857.7093 | -1764.7369 | 0.0000      | 0.0000    |
| 7660.7664              | 3959.4822   | 306.4690   | -3701.2842  | 4022.6382 |
| 305.3368               | -0.6508     | -66.1567   | 656151.2420 | -22.8729  |
| -22.8944               |             |            |             |           |
| [13916]ENERGY: 4160000 | 3203.5889   | 5058.6881  | 5254.4779   |           |
| 352.5764               | -15796.9602 | -1758.0499 | 0.0000      | 0.0000    |
| 7646.7916              | 3961.1127   | 305.9099   | -3685.6789  | 4023.0873 |
| 305.3210               | 39.0282     | -42.9404   | 656151.2420 | -20.4509  |
| -20.4432               |             |            |             |           |
| [13966]ENERGY: 4170000 | 3183.3704   | 5161.5890  | 5287.9006   |           |
| 328.8400               | -15883.2791 | -1760.3873 | 0.0000      | 0.0000    |
| 7645.9315              | 3963.9650   | 305.8755   | -3681.9664  | 4023.7131 |
| 305.4568               | -93.1558    | -139.3840  | 656151.2420 | -22.8723  |
| -22.8778               |             |            |             |           |
| [14002]ENERGY: 4180000 | 3230.5152   | 5104.3965  | 5333.7138   |           |
| 343.8279               | -15875.9785 | -1687.7619 | 0.0000      | 0.0000    |
| 7516.3464              | 3965.0594   | 300.6914   | -3551.2870  | 4023.5868 |
| 305.5710               | 158.0916    | 43.5115    | 656151.2420 | -23.0952  |
| -23.0891               |             |            |             |           |
| [14052]ENERGY: 4190000 | 3150.9969   | 5182.1565  | 5250.1773   |           |
| 319.8310               | -15858.2669 | -1747.8666 | 0.0000      | 0.0000    |
| 7663.7043              | 3960.7326   | 306.5865   | -3702.9717  | 4023.9260 |
| 305.6349               | 37.3930     | 30.4347    | 656151.2420 | -26.4069  |
| -26.3966               |             |            |             |           |
| [14091]ENERGY: 4200000 | 3164.4961   | 5152.2430  | 5227.7247   |           |
| 326.3376               | -15854.8346 | -1740.5257 | 0.0000      | 0.0000    |
| 7686.2149              | 3961.6560   | 307.4870   | -3724.5590  | 4023.9942 |
| 305.6041               | -126.0859   | -37.2232   | 656151.2420 | -21.3288  |
| -21.3144               |             |            |             |           |
| [14141]ENERGY: 4210000 | 3206.1642   | 5152.3275  | 5293.4378   |           |
| 337.5295               | -15853.7869 | -1814.3042 | 0.0000      | 0.0000    |



## Supplementary Text 6

|                        |             |            |             |           |
|------------------------|-------------|------------|-------------|-----------|
| 7641.2822              | 3962.6502   | 305.6895   | -3678.6320  | 4025.1298 |
| 305.6818               | -33.7598    | -71.5753   | 656151.2420 | -24.8440  |
| -24.8715               |             |            |             |           |
| [14177]ENERGY: 4220000 | 3218.2921   | 5211.1074  | 5306.3205   |           |
| 340.5254               | -15842.8368 | -1847.5440 | 0.0000      | 0.0000    |
| 7580.4481              | 3966.3127   | 303.2558   | -3614.1355  | 4024.7197 |
| 305.5671               | -49.9823    | -83.2487   | 656151.2420 | -17.3083  |
| -17.2998               |             |            |             |           |
| [14227]ENERGY: 4230000 | 3177.1353   | 5132.2737  | 5258.5462   |           |
| 334.5894               | -15918.3061 | -1748.0188 | 0.0000      | 0.0000    |
| 7723.4768              | 3959.6966   | 308.9777   | -3763.7802  | 4025.0102 |
| 305.5207               | 31.4766     | -54.4505   | 656151.2420 | -23.9815  |
| -23.9876               |             |            |             |           |
| [14263]ENERGY: 4240000 | 3206.6835   | 5191.8181  | 5272.1236   |           |
| 354.6527               | -15894.0159 | -1710.8695 | 0.0000      | 0.0000    |
| 7541.3916              | 3961.7840   | 301.6934   | -3579.6076  | 4023.7778 |
| 305.5298               | -8.5123     | 41.2530    | 656151.2420 | -21.2532  |
| -21.2342               |             |            |             |           |
| [14313]ENERGY: 4250000 | 3252.8305   | 5200.6855  | 5292.4093   |           |
| 336.0136               | -15926.2905 | -1701.0655 | 0.0000      | 0.0000    |
| 7510.5268              | 3965.1096   | 300.4586   | -3545.4172  | 4023.9202 |
| 305.4212               | 13.9901     | -20.8176   | 656151.2420 | -21.8165  |
| -21.8307               |             |            |             |           |
| [14349]ENERGY: 4260000 | 3153.0086   | 5153.3277  | 5291.3788   |           |
| 361.1064               | -15778.3312 | -1808.6112 | 0.0000      | 0.0000    |
| 7590.8607              | 3962.7397   | 303.6724   | -3628.1209  | 4023.3351 |
| 305.4191               | -255.8809   | -207.5528  | 656151.2420 | -23.7448  |
| -23.7483               |             |            |             |           |
| [14399]ENERGY: 4270000 | 3163.8278   | 5175.2881  | 5294.7273   |           |
| 361.7614               | -15822.8050 | -1776.1561 | 0.0000      | 0.0000    |
| 7566.3032              | 3962.9467   | 302.6900   | -3603.3565  | 4023.7897 |
| 305.5150               | 22.2487     | 13.4696    | 656151.2420 | -24.1605  |
| -24.1526               |             |            |             |           |
| [14435]ENERGY: 4280000 | 3182.4528   | 5200.2033  | 5274.4954   |           |
| 338.9830               | -15842.8999 | -1775.5822 | 0.0000      | 0.0000    |
| 7586.2092              | 3963.8616   | 303.4863   | -3622.3476  | 4024.2545 |
| 305.5519               | -162.6040   | -100.7818  | 656151.2420 | -23.7334  |
| -23.7300               |             |            |             |           |
| [14485]ENERGY: 4290000 | 3184.7010   | 5105.9233  | 5283.0472   |           |
| 331.6899               | -15863.3243 | -1657.1371 | 0.0000      | 0.0000    |
| 7578.8680              | 3963.7680   | 303.1926   | -3615.1001  | 4024.2148 |
| 305.5382               | -1.5134     | -48.1129   | 656151.2420 | -24.7366  |
| -24.7368               |             |            |             |           |
| [14524]ENERGY: 4300000 | 3220.8268   | 5154.7291  | 5291.3045   |           |
| 330.1618               | -15873.4363 | -1767.0647 | 0.0000      | 0.0000    |
| 7606.7773              | 3963.2986   | 304.3091   | -3643.4787  | 4024.5255 |
| 305.4316               | 22.5290     | -56.2778   | 656151.2420 | -23.8058  |
| -23.7983               |             |            |             |           |
| [14574]ENERGY: 4310000 | 3163.7419   | 5163.6994  | 5255.2443   |           |
| 364.9235               | -15873.4065 | -1761.7994 | 0.0000      | 0.0000    |
| 7651.9578              | 3964.3609   | 306.1166   | -3687.5969  | 4023.8181 |
| 305.4395               | -37.1236    | -44.6673   | 656151.2420 | -26.7647  |
| -26.7830               |             |            |             |           |
| [14610]ENERGY: 4320000 | 3180.0833   | 5136.8712  | 5282.6262   |           |

## Supplementary Text 6

|                        |             |            |             |           |
|------------------------|-------------|------------|-------------|-----------|
| 344.5198               | -15943.7880 | -1718.3543 | 0.0000      | 0.0000    |
| 7681.8314              | 3963.7896   | 307.3117   | -3718.0417  | 4023.2738 |
| 305.4153               | -87.7220    | -116.0743  | 656151.2420 | -22.4472  |
| -22.4438               |             |            |             |           |
| [14660]ENERGY: 4330000 | 3166.4568   | 5218.7311  | 5319.1652   |           |
| 332.1702               | -15859.1910 | -1785.3348 | 0.0000      | 0.0000    |
| 7570.5393              | 3962.5367   | 302.8594   | -3608.0026  | 4024.1194 |
| 305.3252               | 101.6762    | 50.0145    | 656151.2420 | -25.4512  |
| -25.4556               |             |            |             |           |
| [14696]ENERGY: 4340000 | 3214.5285   | 5093.8987  | 5287.3130   |           |
| 335.7881               | -15873.7453 | -1731.4555 | 0.0000      | 0.0000    |
| 7638.6549              | 3964.9824   | 305.5844   | -3673.6724  | 4024.0973 |
| 305.2530               | 41.9529     | -46.8583   | 656151.2420 | -21.3985  |
| -21.4020               |             |            |             |           |
| [14746]ENERGY: 4350000 | 3158.6244   | 5207.5492  | 5232.9174   |           |
| 327.3988               | -15791.5810 | -1846.6810 | 0.0000      | 0.0000    |
| 7671.7644              | 3959.9922   | 306.9089   | -3711.7722  | 4023.9032 |
| 305.3355               | -58.1167    | -73.3965   | 656151.2420 | -20.8132  |
| -20.8159               |             |            |             |           |
| [14782]ENERGY: 4360000 | 3162.2064   | 5174.0587  | 5265.4664   |           |
| 343.8812               | -15898.6627 | -1799.5232 | 0.0000      | 0.0000    |
| 7712.2211              | 3959.6479   | 308.5274   | -3752.5732  | 4024.4015 |
| 305.2311               | -4.6941     | 7.1977     | 656151.2420 | -25.5028  |
| -25.4844               |             |            |             |           |
| [14832]ENERGY: 4370000 | 3184.3469   | 5025.3786  | 5300.1853   |           |
| 352.5448               | -15788.3655 | -1746.7375 | 0.0000      | 0.0000    |
| 7635.8553              | 3963.2080   | 305.4724   | -3672.6473  | 4024.7177 |
| 305.1565               | -47.7593    | -41.3782   | 656151.2420 | -17.7446  |
| -17.7556               |             |            |             |           |
| [14868]ENERGY: 4380000 | 3133.9576   | 5168.2817  | 5237.1874   |           |
| 330.4794               | -15866.6884 | -1731.3540 | 0.0000      | 0.0000    |
| 7692.4955              | 3964.3592   | 307.7383   | -3728.1363  | 4023.8763 |
| 305.3190               | 47.3573     | -58.1095   | 656151.2420 | -25.9415  |
| -25.9389               |             |            |             |           |
| [14918]ENERGY: 4390000 | 3187.0195   | 5108.3687  | 5266.4552   |           |
| 330.9916               | -15845.9917 | -1680.1170 | 0.0000      | 0.0000    |
| 7597.9220              | 3964.6484   | 303.9549   | -3633.2736  | 4024.6975 |
| 305.4074               | -20.6420    | -1.2470    | 656151.2420 | -20.6718  |
| -20.6497               |             |            |             |           |
| [14957]ENERGY: 4400000 | 3154.2814   | 5195.3200  | 5298.3988   |           |
| 339.5754               | -15898.7388 | -1786.1885 | 0.0000      | 0.0000    |
| 7659.5180              | 3962.1663   | 306.4190   | -3697.3517  | 4025.4519 |
| 305.4510               | -58.7675    | -128.2341  | 656151.2420 | -25.5938  |
| -25.6073               |             |            |             |           |
| [15007]ENERGY: 4410000 | 3185.3391   | 5155.8850  | 5295.8056   |           |
| 325.0465               | -15865.6082 | -1765.1209 | 0.0000      | 0.0000    |
| 7628.0698              | 3959.4171   | 305.1609   | -3668.6527  | 4025.1962 |
| 305.3810               | 21.1602     | 27.6167    | 656151.2420 | -28.6668  |
| -28.6704               |             |            |             |           |
| [15043]ENERGY: 4420000 | 3219.9327   | 5193.3404  | 5273.1772   |           |
| 328.2757               | -15932.7247 | -1714.4815 | 0.0000      | 0.0000    |
| 7595.3671              | 3962.8869   | 303.8527   | -3632.4801  | 4025.0851 |
| 305.5635               | -24.4920    | 1.3261     | 656151.2420 | -18.6245  |
| -18.6198               |             |            |             |           |

## Supplementary Text 6

|                |             |            |             |           |
|----------------|-------------|------------|-------------|-----------|
| [15093]ENERGY: | 4430000     | 3165.0126  | 5258.9338   | 5254.2250 |
| 329.7845       | -15761.7502 | -1786.8385 | 0.0000      | 0.0000    |
| 7504.4813      | 3963.8486   | 300.2168   | -3540.6327  | 4025.6293 |
| 305.7266       | -19.7424    | -93.4868   | 656151.2420 | -27.7298  |
| -27.7311       |             |            |             |           |
| [15129]ENERGY: | 4440000     | 3108.3144  | 5249.4888   | 5282.0183 |
| 334.4292       | -15877.0621 | -1779.3603 | 0.0000      | 0.0000    |
| 7644.2998      | 3962.1281   | 305.8102   | -3682.1716  | 4023.9689 |
| 305.6428       | 121.6863    | 17.3029    | 656151.2420 | -25.0895  |
| -25.0878       |             |            |             |           |
| [15179]ENERGY: | 4450000     | 3176.1101  | 5204.4157   | 5293.0004 |
| 327.0472       | -15878.0306 | -1754.2544 | 0.0000      | 0.0000    |
| 7591.4075      | 3959.6959   | 303.6943   | -3631.7116  | 4024.3637 |
| 305.5974       | -112.7537   | -150.4223  | 656151.2420 | -24.1377  |
| -24.1368       |             |            |             |           |
| [15215]ENERGY: | 4460000     | 3217.8032  | 5193.4023   | 5200.4961 |
| 326.6551       | -15832.5462 | -1770.2489 | 0.0000      | 0.0000    |
| 7631.3376      | 3966.8991   | 305.2917   | -3664.4385  | 4025.2778 |
| 305.2316       | -11.1259    | -51.3998   | 656151.2420 | -26.9354  |
| -26.9519       |             |            |             |           |
| [15265]ENERGY: | 4470000     | 3202.6631  | 5211.8635   | 5231.7417 |
| 334.8865       | -15885.2107 | -1775.4526 | 0.0000      | 0.0000    |
| 7642.4344      | 3962.9260   | 305.7356   | -3679.5084  | 4023.7610 |
| 305.2906       | -120.3279   | -143.5269  | 656151.2420 | -26.9304  |
| -26.9226       |             |            |             |           |
| [15301]ENERGY: | 4480000     | 3106.6853  | 5123.5603   | 5277.2129 |
| 347.0737       | -15802.2582 | -1790.3156 | 0.0000      | 0.0000    |
| 7700.0104      | 3961.9688   | 308.0389   | -3738.0416  | 4024.6798 |
| 305.6168       | -67.5477    | -140.4192  | 656151.2420 | -24.6399  |
| -24.6427       |             |            |             |           |
| [15351]ENERGY: | 4490000     | 3179.5515  | 5136.7449   | 5236.7074 |
| 316.7117       | -15726.5901 | -1826.7760 | 0.0000      | 0.0000    |
| 7644.0435      | 3960.3929   | 305.8000   | -3683.6506  | 4024.6505 |
| 305.5719       | 53.4015     | 1.9547     | 656151.2420 | -26.5285  |
| -26.5401       |             |            |             |           |
| [15390]ENERGY: | 4500000     | 3147.5141  | 5110.6896   | 5278.0579 |
| 338.0806       | -15913.1324 | -1675.9077 | 0.0000      | 0.0000    |
| 7675.9234      | 3961.2256   | 307.0753   | -3714.6978  | 4022.8896 |
| 305.5802       | -39.0011    | -41.2648   | 656151.2420 | -26.2339  |
| -26.2278       |             |            |             |           |
| [15440]ENERGY: | 4510000     | 3234.7402  | 5243.3508   | 5275.2717 |
| 327.2656       | -15970.5127 | -1721.2558 | 0.0000      | 0.0000    |
| 7578.5824      | 3967.4423   | 303.1812   | -3611.1401  | 4025.0162 |
| 305.4044       | 142.9808    | 75.3702    | 656151.2420 | -20.7234  |
| -20.7245       |             |            |             |           |
| [15476]ENERGY: | 4520000     | 3157.2451  | 5144.0332   | 5277.2566 |
| 311.6162       | -15865.8236 | -1697.6191 | 0.0000      | 0.0000    |
| 7638.1885      | 3964.8969   | 305.5657   | -3673.2916  | 4023.2164 |
| 305.4536       | 176.8157    | 59.1345    | 656151.2420 | -21.5666  |
| -21.5544       |             |            |             |           |
| [15526]ENERGY: | 4530000     | 3150.1217  | 5226.5405   | 5244.7966 |
| 319.5322       | -15764.7289 | -1837.9583 | 0.0000      | 0.0000    |
| 7624.3982      | 3962.7021   | 305.0140   | -3661.6961  | 4024.3793 |
| 305.3617       | -6.7118     | -87.1715   | 656151.2420 | -18.5382  |

Supplementary Text 6

-18.5315  
 [15562]ENERGY: 4540000 3165.8403 5181.9894 5308.6380  
 338.7414 -15933.9318 -1728.2574 0.0000 0.0000  
 7629.2331 3962.2530 305.2075 -3666.9801 4023.1690  
 305.3796 -130.3592 -36.3302 656151.2420 -24.0557  
 -24.0677  
 [15612]ENERGY: 4550000 3131.2568 5156.6823 5217.7579  
 339.7719 -15854.3426 -1734.2242 0.0000 0.0000  
 7701.5004 3958.4026 308.0985 -3743.0979 4024.1615  
 305.4793 35.5277 -19.1140 656151.2420 -16.4591  
 -16.4581  
 [15648]ENERGY: 4560000 3189.1372 5173.6164 5264.4075  
 353.7692 -15860.0928 -1761.8170 0.0000 0.0000  
 7600.1360 3959.1566 304.0434 -3640.9794 4022.9759  
 305.3887 -70.4123 -98.6936 656151.2420 -26.6425  
 -26.6367  
 [15698]ENERGY: 4570000 3180.0307 5153.8387 5246.7854  
 350.8853 -15914.1271 -1747.3161 0.0000 0.0000  
 7690.6375 3960.7344 307.6640 -3729.9031 4023.9137  
 305.4848 77.6368 22.0234 656151.2420 -22.6289  
 -22.6366  
 [15734]ENERGY: 4580000 3209.4649 5158.6431 5220.4432  
 327.9255 -15701.9382 -1832.7298 0.0000 0.0000  
 7583.3170 3965.1258 303.3706 -3618.1912 4025.3666  
 305.4062 -50.6899 -72.3578 656151.2420 -23.2132  
 -23.2075  
 [15784]ENERGY: 4590000 3235.2315 5229.3320 5253.8478  
 327.9622 -15835.9258 -1810.9393 0.0000 0.0000  
 7564.4600 3963.9683 302.6162 -3600.4917 4024.1895  
 305.0926 -250.3856 -191.6809 656151.2420 -25.0935  
 -25.0961  
 [15823]ENERGY: 4600000 3185.9118 5159.2111 5213.4235  
 360.1054 -15908.8686 -1687.6649 0.0000 0.0000  
 7638.8160 3960.9344 305.5908 -3677.8816 4024.4362  
 305.5199 167.6388 101.5190 656151.2420 -22.1811  
 -22.1854  
 [15873]ENERGY: 4610000 3171.5423 5218.4684 5260.8757  
 327.1829 -15780.7065 -1858.9612 0.0000 0.0000  
 7622.6737 3961.0753 304.9451 -3661.5984 4025.1853  
 305.3979 -59.4682 -63.4748 656151.2420 -22.3400  
 -22.3417  
 [15909]ENERGY: 4620000 3170.0476 5107.8878 5229.5646  
 340.1682 -15894.0374 -1677.5682 0.0000 0.0000  
 7686.9316 3962.9941 307.5157 -3723.9375 4024.0157  
 305.3374 91.6364 111.1114 656151.2420 -17.7192  
 -17.7075  
 [15959]ENERGY: 4630000 3195.1724 5215.9398 5300.9414  
 333.5308 -15853.7519 -1794.1353 0.0000 0.0000  
 7567.9601 3965.6572 302.7562 -3602.3030 4025.2677  
 305.4455 -64.1378 -0.5155 656151.2420 -20.1372  
 -20.1494  
 [15995]ENERGY: 4640000 3173.7769 5179.7249 5246.8000  
 331.4142 -15837.2733 -1812.4131 0.0000 0.0000  
 7682.8218 3964.8514 307.3513 -3717.9703 4024.6312

Supplementary Text 6

|                        |             |            |             |           |
|------------------------|-------------|------------|-------------|-----------|
| 305.4202               | -93.6113    | -102.2083  | 656151.2420 | -19.8814  |
| -19.8609               |             |            |             |           |
| [16045]ENERGY: 4650000 | 3106.6881   | 5118.4542  | 5339.4649   |           |
| 355.4669               | -15973.0173 | -1720.5982 | 0.0000      | 0.0000    |
| 7733.1643              | 3959.6230   | 309.3652   | -3773.5413  | 4024.4518 |
| 305.1879               | 125.6606    | 93.9729    | 656151.2420 | -21.7602  |
| -21.7684               |             |            |             |           |
| [16081]ENERGY: 4660000 | 3171.0956   | 5236.9185  | 5256.4394   |           |
| 314.5978               | -15899.9067 | -1792.6661 | 0.0000      | 0.0000    |
| 7679.2976              | 3965.7761   | 307.2103   | -3713.5215  | 4025.1637 |
| 305.3289               | 95.7070     | -3.9867    | 656151.2420 | -24.8862  |
| -24.8947               |             |            |             |           |
| [16131]ENERGY: 4670000 | 3174.9169   | 5176.3687  | 5275.1201   |           |
| 310.5952               | -15857.7985 | -1737.2978 | 0.0000      | 0.0000    |
| 7623.1506              | 3965.0551   | 304.9641   | -3658.0955  | 4026.3264 |
| 305.4738               | 9.4092      | -24.4478   | 656151.2420 | -20.2053  |
| -20.2073               |             |            |             |           |
| [16167]ENERGY: 4680000 | 3186.4141   | 5131.9449  | 5311.2169   |           |
| 327.3892               | -15804.1703 | -1813.2684 | 0.0000      | 0.0000    |
| 7623.0817              | 3962.6080   | 304.9614   | -3660.4737  | 4026.2348 |
| 305.4514               | -41.4921    | -60.6807   | 656151.2420 | -21.8334  |
| -21.8477               |             |            |             |           |
| [16217]ENERGY: 4690000 | 3143.1719   | 5146.2169  | 5248.8491   |           |
| 338.0038               | -15811.3429 | -1708.1896 | 0.0000      | 0.0000    |
| 7609.7693              | 3966.4785   | 304.4288   | -3643.2908  | 4025.8708 |
| 305.5285               | -40.2300    | -41.2808   | 656151.2420 | -24.6780  |
| -24.6505               |             |            |             |           |
| [16256]ENERGY: 4700000 | 3138.0439   | 5263.0960  | 5258.1091   |           |
| 321.4026               | -15844.3120 | -1787.1633 | 0.0000      | 0.0000    |
| 7617.4075              | 3966.5840   | 304.7344   | -3650.8235  | 4026.6547 |
| 305.7617               | -18.6962    | 12.6517    | 656151.2420 | -17.9372  |
| -17.9447               |             |            |             |           |
| [16306]ENERGY: 4710000 | 3147.5715   | 5149.4583  | 5224.0177   |           |
| 344.2000               | -15871.9134 | -1668.9223 | 0.0000      | 0.0000    |
| 7638.0183              | 3962.4300   | 305.5589   | -3675.5882  | 4026.1490 |
| 305.5339               | 91.7929     | 25.0602    | 656151.2420 | -19.6943  |
| -19.7094               |             |            |             |           |
| [16342]ENERGY: 4720000 | 3157.8974   | 5233.6459  | 5259.1162   |           |
| 332.6119               | -15838.4212 | -1767.8582 | 0.0000      | 0.0000    |
| 7588.4580              | 3965.4501   | 303.5763   | -3623.0080  | 4026.4269 |
| 305.4574               | 38.0507     | -13.3533   | 656151.2420 | -24.3838  |
| -24.3628               |             |            |             |           |
| [16392]ENERGY: 4730000 | 3214.5798   | 5095.6680  | 5232.8453   |           |
| 348.8837               | -15837.9500 | -1666.4967 | 0.0000      | 0.0000    |
| 7577.0151              | 3964.5452   | 303.1185   | -3612.4698  | 4026.2699 |
| 305.5844               | 199.3476    | 102.2080   | 656151.2420 | -21.7577  |
| -21.7663               |             |            |             |           |
| [16428]ENERGY: 4740000 | 3122.5285   | 5220.8721  | 5262.8029   |           |
| 362.9159               | -15833.8057 | -1814.1788 | 0.0000      | 0.0000    |
| 7641.5802              | 3962.7151   | 305.7014   | -3678.8651  | 4027.2494 |
| 305.6645               | -127.5315   | -154.2207  | 656151.2420 | -24.3728  |
| -24.3664               |             |            |             |           |
| [16478]ENERGY: 4750000 | 3202.3316   | 5166.8740  | 5231.2939   |           |
| 338.1729               | -15851.2146 | -1742.5885 | 0.0000      | 0.0000    |

## Supplementary Text 6

|                        |             |            |             |           |
|------------------------|-------------|------------|-------------|-----------|
| 7618.5912              | 3963.4605   | 304.7817   | -3655.1307  | 4026.6763 |
| 305.4483               | -59.1335    | 45.0304    | 656151.2420 | -23.1457  |
| -23.1529               |             |            |             |           |
| [16514]ENERGY: 4760000 | 3164.2350   | 5126.7071  | 5277.3073   |           |
| 343.4120               | -15813.2511 | -1749.6672 | 0.0000      | 0.0000    |
| 7617.9304              | 3966.6735   | 304.7553   | -3651.2569  | 4027.3413 |
| 305.5295               | -35.2228    | -104.3341  | 656151.2420 | -18.8406  |
| -18.8460               |             |            |             |           |
| [16564]ENERGY: 4770000 | 3127.4558   | 5137.0713  | 5258.4083   |           |
| 331.5529               | -15886.3958 | -1715.2429 | 0.0000      | 0.0000    |
| 7710.7156              | 3963.5653   | 308.4672   | -3747.1503  | 4028.2642 |
| 305.3957               | 81.8580     | 55.4165    | 656151.2420 | -21.1643  |
| -21.1500               |             |            |             |           |
| [16600]ENERGY: 4780000 | 3239.3978   | 5183.6467  | 5274.2224   |           |
| 358.2566               | -15873.4050 | -1806.0422 | 0.0000      | 0.0000    |
| 7593.2574              | 3969.3337   | 303.7683   | -3623.9236  | 4027.7854 |
| 305.5933               | -244.2121   | -200.8856  | 656151.2420 | -19.3505  |
| -19.3595               |             |            |             |           |
| [16650]ENERGY: 4790000 | 3193.8106   | 5105.0024  | 5299.8048   |           |
| 351.0182               | -15890.3027 | -1726.8468 | 0.0000      | 0.0000    |
| 7638.9307              | 3971.4172   | 305.5954   | -3667.5136  | 4027.8321 |
| 305.7206               | 28.6438     | -18.9721   | 656151.2420 | -22.4810  |
| -22.4718               |             |            |             |           |
| [16689]ENERGY: 4800000 | 3188.4312   | 5220.2399  | 5291.5642   |           |
| 316.5784               | -15898.8167 | -1760.1339 | 0.0000      | 0.0000    |
| 7609.6416              | 3967.5046   | 304.4237   | -3642.1370  | 4028.2126 |
| 305.7185               | -18.1303    | -78.5075   | 656151.2420 | -24.5260  |
| -24.5224               |             |            |             |           |
| [16739]ENERGY: 4810000 | 3198.3444   | 5184.5517  | 5226.7450   |           |
| 330.3655               | -15838.5480 | -1733.1872 | 0.0000      | 0.0000    |
| 7597.1392              | 3965.4107   | 303.9236   | -3631.7284  | 4029.1751 |
| 305.5230               | -24.0121    | -161.6925  | 656151.2420 | -25.6912  |
| -25.7026               |             |            |             |           |
| [16775]ENERGY: 4820000 | 3130.7848   | 5061.0794  | 5309.5204   |           |
| 324.3028               | -15728.1714 | -1747.9043 | 0.0000      | 0.0000    |
| 7617.3677              | 3966.9792   | 304.7328   | -3650.3885  | 4028.0989 |
| 305.6995               | -50.6548    | -33.1529   | 656151.2420 | -24.7073  |
| -24.7148               |             |            |             |           |
| [16825]ENERGY: 4830000 | 3160.3373   | 5113.9291  | 5255.1224   |           |
| 336.8313               | -15753.5853 | -1784.2323 | 0.0000      | 0.0000    |
| 7638.8782              | 3967.2807   | 305.5933   | -3671.5975  | 4028.7179 |
| 305.7246               | 113.1613    | 35.8064    | 656151.2420 | -22.4539  |
| -22.4397               |             |            |             |           |
| [16861]ENERGY: 4840000 | 3104.6795   | 5190.4514  | 5284.7853   |           |
| 345.7149               | -15886.4321 | -1698.1845 | 0.0000      | 0.0000    |
| 7622.5319              | 3963.5464   | 304.9394   | -3658.9856  | 4027.3940 |
| 305.5054               | 114.3621    | 44.1822    | 656151.2420 | -27.3587  |
| -27.3730               |             |            |             |           |
| [16911]ENERGY: 4850000 | 3189.8829   | 5148.8924  | 5277.1791   |           |
| 315.1487               | -15814.9007 | -1722.2584 | 0.0000      | 0.0000    |
| 7574.6089              | 3968.5530   | 303.0222   | -3606.0559  | 4027.9290 |
| 305.6335               | 38.9046     | 18.5693    | 656151.2420 | -22.7808  |
| -22.7591               |             |            |             |           |
| [16947]ENERGY: 4860000 | 3230.8260   | 5265.0991  | 5279.1287   |           |

## Supplementary Text 6

|                        |             |            |             |           |
|------------------------|-------------|------------|-------------|-----------|
| 324.2427               | -15982.9394 | -1715.4513 | 0.0000      | 0.0000    |
| 7567.0598              | 3967.9657   | 302.7202   | -3599.0941  | 4027.0426 |
| 305.5235               | -48.3836    | -101.5694  | 656151.2420 | -24.6063  |
| -24.6289               |             |            |             |           |
| [16997]ENERGY: 4870000 | 3200.3301   | 5115.2942  | 5290.4207   |           |
| 358.8707               | -15818.9777 | -1837.0090 | 0.0000      | 0.0000    |
| 7656.9994              | 3965.9286   | 306.3183   | -3691.0708  | 4028.3865 |
| 305.5596               | -56.5215    | -164.0185  | 656151.2420 | -24.3700  |
| -24.3409               |             |            |             |           |
| [17033]ENERGY: 4880000 | 3219.7567   | 5240.8136  | 5233.0195   |           |
| 354.0964               | -15837.4596 | -1804.4689 | 0.0000      | 0.0000    |
| 7562.1845              | 3967.9422   | 302.5252   | -3594.2423  | 4029.0566 |
| 305.5700               | 40.5529     | -26.3782   | 656151.2420 | -26.0608  |
| -26.0696               |             |            |             |           |
| [17083]ENERGY: 4890000 | 3143.9178   | 5141.5428  | 5293.1562   |           |
| 354.1056               | -15832.1410 | -1772.2920 | 0.0000      | 0.0000    |
| 7640.7497              | 3969.0392   | 305.6682   | -3671.7106  | 4028.3068 |
| 305.4029               | -11.1197    | 7.8288     | 656151.2420 | -25.1789  |
| -25.1865               |             |            |             |           |
| [17122]ENERGY: 4900000 | 3190.7470   | 5170.7840  | 5281.2269   |           |
| 352.7986               | -15860.7651 | -1763.9516 | 0.0000      | 0.0000    |
| 7597.4412              | 3968.2812   | 303.9356   | -3629.1601  | 4028.7453 |
| 305.4849               | -56.4751    | -1.4649    | 656151.2420 | -25.1199  |
| -25.1392               |             |            |             |           |
| [17172]ENERGY: 4910000 | 3131.6865   | 5219.7020  | 5282.3193   |           |
| 332.7260               | -15826.8734 | -1853.1398 | 0.0000      | 0.0000    |
| 7678.8848              | 3965.3055   | 307.1938   | -3713.5793  | 4029.8618 |
| 305.7628               | -7.2139     | -42.1804   | 656151.2420 | -25.5327  |
| -25.5250               |             |            |             |           |
| [17208]ENERGY: 4920000 | 3163.6032   | 5113.2931  | 5230.8345   |           |
| 354.2042               | -15871.5033 | -1749.0560 | 0.0000      | 0.0000    |
| 7723.3120              | 3964.6877   | 308.9711   | -3758.6243  | 4028.0149 |
| 305.6525               | 187.6679    | 175.0924   | 656151.2420 | -26.1514  |
| -26.1559               |             |            |             |           |
| [17258]ENERGY: 4930000 | 3222.8108   | 5227.7430  | 5277.5557   |           |
| 354.4223               | -15941.9262 | -1730.5842 | 0.0000      | 0.0000    |
| 7560.6257              | 3970.6470   | 302.4628   | -3589.9786  | 4028.7837 |
| 305.7700               | -78.3808    | -45.1002   | 656151.2420 | -22.1824  |
| -22.1584               |             |            |             |           |
| [17294]ENERGY: 4940000 | 3245.5337   | 5197.8429  | 5253.1053   |           |
| 304.9226               | -15830.6373 | -1794.9866 | 0.0000      | 0.0000    |
| 7592.5160              | 3968.2967   | 303.7386   | -3624.2194  | 4029.0324 |
| 305.8029               | -124.9848   | -145.0291  | 656151.2420 | -23.1446  |
| -23.1500               |             |            |             |           |
| [17344]ENERGY: 4950000 | 3121.7174   | 5176.1596  | 5263.4263   |           |
| 321.1638               | -15805.1744 | -1751.6038 | 0.0000      | 0.0000    |
| 7640.0396              | 3965.7284   | 305.6398   | -3674.3113  | 4029.1021 |
| 305.6669               | -30.2931    | -31.9338   | 656151.2420 | -25.2968  |
| -25.3058               |             |            |             |           |
| [17380]ENERGY: 4960000 | 3266.2654   | 5220.8810  | 5248.5508   |           |
| 340.8275               | -15925.8211 | -1791.9828 | 0.0000      | 0.0000    |
| 7610.2748              | 3968.9956   | 304.4490   | -3641.2792  | 4029.3977 |
| 305.7168               | -139.2718   | -153.5968  | 656151.2420 | -21.5547  |
| -21.5455               |             |            |             |           |

## Supplementary Text 6

|                        |             |            |             |           |
|------------------------|-------------|------------|-------------|-----------|
| [17430]ENERGY: 4970000 | 3147.5966   | 5255.0883  | 5258.0541   |           |
| 338.8421               | -15870.2254 | -1832.7398 | 0.0000      | 0.0000    |
| 7667.8253              | 3964.4412   | 306.7513   | -3703.3841  | 4029.1867 |
| 305.7072               | -135.5933   | -149.0330  | 656151.2420 | -23.7148  |
| -23.7264               |             |            |             |           |
| [17466]ENERGY: 4980000 | 3195.8193   | 5214.1316  | 5284.7496   |           |
| 319.2780               | -15840.6019 | -1812.8530 | 0.0000      | 0.0000    |
| 7609.8681              | 3970.3918   | 304.4328   | -3639.4763  | 4031.6715 |
| 305.5813               | -9.2769     | -53.6365   | 656151.2420 | -19.5501  |
| -19.5478               |             |            |             |           |
| [17516]ENERGY: 4990000 | 3161.6141   | 5136.0222  | 5302.3553   |           |
| 330.6064               | -15839.4786 | -1744.0138 | 0.0000      | 0.0000    |
| 7621.8681              | 3968.9736   | 304.9128   | -3652.8945  | 4030.3717 |
| 305.7286               | 59.8467     | 18.5985    | 656151.2420 | -25.5171  |
| -25.5022               |             |            |             |           |
| [17555]ENERGY: 5000000 | 3169.1068   | 5180.3586  | 5290.7885   |           |
| 335.8401               | -15822.5602 | -1799.9922 | 0.0000      | 0.0000    |
| 7613.9525              | 3967.4941   | 304.5962   | -3646.4584  | 4029.5971 |
| 305.6476               | -81.0819    | -88.0469   | 656151.2420 | -17.8755  |
| -17.8846               |             |            |             |           |
| [17605]ENERGY: 5010000 | 3104.3882   | 5331.3645  | 5207.5921   |           |
| 324.8799               | -15887.7948 | -1708.3240 | 0.0000      | 0.0000    |
| 7597.7855              | 3969.8914   | 303.9494   | -3627.8941  | 4030.5646 |
| 305.5616               | 93.0162     | 107.3341   | 656151.2420 | -21.4358  |
| -21.4239               |             |            |             |           |
| [17641]ENERGY: 5020000 | 3228.8551   | 5185.8807  | 5291.1267   |           |
| 310.1849               | -15830.9855 | -1750.5096 | 0.0000      | 0.0000    |
| 7537.7693              | 3972.3216   | 301.5485   | -3565.4477  | 4031.0247 |
| 305.5123               | 73.7675     | 3.3241     | 656151.2420 | -21.2926  |
| -21.2888               |             |            |             |           |
| [17691]ENERGY: 5030000 | 3178.2215   | 5159.8910  | 5223.3259   |           |
| 326.7910               | -15841.8752 | -1770.1748 | 0.0000      | 0.0000    |
| 7690.1472              | 3966.3266   | 307.6443   | -3723.8206  | 4031.0425 |
| 305.6838               | -98.4789    | -103.9856  | 656151.2420 | -24.8075  |
| -24.8326               |             |            |             |           |
| [17727]ENERGY: 5040000 | 3205.8233   | 5191.1457  | 5247.7658   |           |
| 315.2164               | -15835.9662 | -1715.5081 | 0.0000      | 0.0000    |
| 7565.6416              | 3974.1185   | 302.6635   | -3591.5231  | 4031.4986 |
| 305.5826               | 36.8419     | -103.3596  | 656151.2420 | -26.7031  |
| -26.7121               |             |            |             |           |
| [17777]ENERGY: 5050000 | 3129.5723   | 5141.4303  | 5297.0710   |           |
| 344.4270               | -15825.6033 | -1773.5544 | 0.0000      | 0.0000    |
| 7654.9483              | 3968.2913   | 306.2362   | -3686.6570  | 4031.0682 |
| 305.4731               | 77.8552     | -19.7558   | 656151.2420 | -24.1573  |
| -24.1446               |             |            |             |           |
| [17813]ENERGY: 5060000 | 3197.3141   | 5192.8077  | 5306.0123   |           |
| 329.1897               | -15887.6475 | -1799.9445 | 0.0000      | 0.0000    |
| 7633.1327              | 3970.8646   | 305.3635   | -3662.2681  | 4030.4220 |
| 305.3086               | -196.3423   | -142.7683  | 656151.2420 | -25.7889  |
| -25.7975               |             |            |             |           |
| [17863]ENERGY: 5070000 | 3070.0522   | 5155.7127  | 5281.0415   |           |
| 351.2184               | -15814.1575 | -1782.9756 | 0.0000      | 0.0000    |
| 7705.8609              | 3966.7526   | 308.2730   | -3739.1083  | 4031.9271 |
| 305.4814               | 152.0307    | 29.6226    | 656151.2420 | -19.6413  |



Supplementary Text 6

-19.6391  
 [17899]ENERGY: 5080000      3172.2682      5229.6115      5237.1005  
 329.7593      -15780.2223      -1761.6021      0.0000      0.0000  
 7544.5998      3971.5150      301.8217      -3573.0848      4032.0481  
 305.6440      96.9672      76.4047      656151.2420      -26.5111  
 -26.5132  
 [17949]ENERGY: 5090000      3173.7698      5149.8489      5290.9604  
 328.8702      -15787.8547      -1747.5424      0.0000      0.0000  
 7564.8183      3972.8705      302.6306      -3591.9478      4032.1535  
 305.4753      -85.8768      -82.0943      656151.2420      -21.5527  
 -21.5367  
 [17988]ENERGY: 5100000      3232.9844      5150.5492      5239.9974  
 343.1702      -15808.0807      -1803.6044      0.0000      0.0000  
 7617.1555      3972.1716      304.7243      -3644.9839      4031.5900  
 305.4712      -48.9455      -1.4686      656151.2420      -24.8859  
 -24.8851  
 [18038]ENERGY: 5110000      3114.2603      5146.0692      5299.6639  
 337.0870      -15887.9994      -1745.5662      0.0000      0.0000  
 7704.8099      3968.3246      308.2309      -3736.4853      4031.5620  
 305.6630      95.7307      58.2979      656151.2420      -18.1163  
 -18.1227  
 [18074]ENERGY: 5120000      3196.8355      5192.6201      5321.2946  
 346.0690      -15946.4163      -1741.2297      0.0000      0.0000  
 7600.9732      3970.1464      304.0769      -3630.8267      4031.6789  
 305.7010      69.0707      -35.5824      656151.2420      -27.0226  
 -27.0399  
 [18124]ENERGY: 5130000      3262.3613      5144.7009      5310.4122  
 320.2873      -15870.2702      -1825.3359      0.0000      0.0000  
 7631.5720      3973.7277      305.3010      -3657.8443      4031.8389  
 305.5897      -186.4684      -115.8369      656151.2420      -19.8838  
 -19.8539  
 [18160]ENERGY: 5140000      3138.6003      5124.3073      5267.9314  
 343.6134      -15831.6539      -1759.4818      0.0000      0.0000  
 7683.0093      3966.3260      307.3588      -3716.6833      4031.2521  
 305.7544      -79.2398      -108.6832      656151.2420      -27.2428  
 -27.2652  
 [18210]ENERGY: 5150000      3166.4321      5253.6838      5289.0987  
 299.5651      -15840.3052      -1757.7672      0.0000      0.0000  
 7559.3820      3970.0892      302.4131      -3589.2927      4031.3889  
 305.6266      -32.2432      -15.1545      656151.2420      -22.4085  
 -22.3916  
 [18246]ENERGY: 5160000      3194.9623      5198.4141      5272.6565  
 308.8627      -15856.0834      -1832.6827      0.0000      0.0000  
 7683.4777      3969.6073      307.3775      -3713.8705      4032.0630  
 305.7352      10.1002      -15.3267      656151.2420      -23.5872  
 -23.5923  
 [18296]ENERGY: 5170000      3182.2490      5153.6953      5255.4373  
 359.7968      -15828.2566      -1779.0239      0.0000      0.0000  
 7626.0380      3969.9361      305.0796      -3656.1020      4030.4991  
 305.5869      -27.7353      -28.0707      656151.2420      -25.1644  
 -25.1708  
 [18332]ENERGY: 5180000      3212.7072      5207.1347      5241.6113  
 358.5848      -15890.4905      -1728.3651      0.0000      0.0000  
 7571.1515      3972.3339      302.8839      -3598.8176      4030.5324

Supplementary Text 6

|                        |             |            |             |           |
|------------------------|-------------|------------|-------------|-----------|
| 305.6430               | -121.5729   | -159.8978  | 656151.2420 | -19.6125  |
| -19.6196               |             |            |             |           |
| [18382]ENERGY: 5190000 | 3162.0418   | 5254.9456  | 5250.4374   |           |
| 329.1076               | -15864.9591 | -1819.0725 | 0.0000      | 0.0000    |
| 7657.9471              | 3970.4478   | 306.3562   | -3687.4992  | 4032.7392 |
| 305.6213               | -0.7367     | -23.2741   | 656151.2420 | -23.8879  |
| -23.8908               |             |            |             |           |
| [18421]ENERGY: 5200000 | 3150.1509   | 5168.9711  | 5279.9791   |           |
| 342.9331               | -15885.2815 | -1755.0342 | 0.0000      | 0.0000    |
| 7670.3534              | 3972.0718   | 306.8525   | -3698.2816  | 4033.5738 |
| 305.7682               | 50.2106     | -24.2957   | 656151.2420 | -23.1334  |
| -23.1274               |             |            |             |           |
| [18471]ENERGY: 5210000 | 3137.7628   | 5284.2028  | 5205.3750   |           |
| 359.9324               | -15799.5821 | -1775.9560 | 0.0000      | 0.0000    |
| 7559.8598              | 3971.5947   | 302.4322   | -3588.2651  | 4032.9987 |
| 305.7672               | -2.9213     | 8.1510     | 656151.2420 | -22.3905  |
| -22.3780               |             |            |             |           |
| [18507]ENERGY: 5220000 | 3167.8240   | 5199.5066  | 5255.2238   |           |
| 323.4806               | -15811.5929 | -1825.6424 | 0.0000      | 0.0000    |
| 7664.3952              | 3973.1951   | 306.6141   | -3691.2002  | 4034.8831 |
| 305.6936               | -11.6572    | -52.5590   | 656151.2420 | -24.2668  |
| -24.2538               |             |            |             |           |
| [18557]ENERGY: 5230000 | 3122.1468   | 5246.5447  | 5278.3285   |           |
| 351.8570               | -15932.1127 | -1729.4549 | 0.0000      | 0.0000    |
| 7635.0797              | 3972.3891   | 305.4414   | -3662.6906  | 4033.6567 |
| 305.7877               | 120.2709    | 30.5134    | 656151.2420 | -22.5577  |
| -22.5731               |             |            |             |           |
| [18593]ENERGY: 5240000 | 3167.4593   | 5185.0687  | 5279.3871   |           |
| 329.9376               | -15824.3240 | -1826.1804 | 0.0000      | 0.0000    |
| 7658.9545              | 3970.3028   | 306.3965   | -3688.6518  | 4032.6037 |
| 305.6570               | -43.3676    | -103.1480  | 656151.2420 | -23.6798  |
| -23.6844               |             |            |             |           |
| [18643]ENERGY: 5250000 | 3141.5205   | 5155.9625  | 5297.0388   |           |
| 315.8625               | -15785.9022 | -1786.3716 | 0.0000      | 0.0000    |
| 7631.7558              | 3969.8663   | 305.3084   | -3661.8896  | 4032.5869 |
| 305.6173               | -54.3747    | -61.6948   | 656151.2420 | -24.1223  |
| -24.1061               |             |            |             |           |
| [18679]ENERGY: 5260000 | 3235.4508   | 5212.0141  | 5324.5568   |           |
| 359.8817               | -15893.6635 | -1825.9768 | 0.0000      | 0.0000    |
| 7562.5020              | 3974.7650   | 302.5379   | -3587.7369  | 4033.6682 |
| 305.9384               | -100.1107   | -138.9998  | 656151.2420 | -21.1918  |
| -21.1892               |             |            |             |           |
| [18729]ENERGY: 5270000 | 3179.5073   | 5155.3179  | 5262.6078   |           |
| 344.1925               | -15747.1681 | -1905.2643 | 0.0000      | 0.0000    |
| 7681.2035              | 3970.3965   | 307.2865   | -3710.8069  | 4034.5503 |
| 305.8739               | -3.2979     | -155.2980  | 656151.2420 | -22.9137  |
| -22.9264               |             |            |             |           |
| [18765]ENERGY: 5280000 | 3187.8508   | 5209.9260  | 5243.3769   |           |
| 331.0031               | -15841.4634 | -1784.0102 | 0.0000      | 0.0000    |
| 7624.6170              | 3971.3001   | 305.0228   | -3653.3169  | 4032.9426 |
| 305.8635               | 20.5226     | 49.1042    | 656151.2420 | -24.8370  |
| -24.8277               |             |            |             |           |
| [18815]ENERGY: 5290000 | 3201.6838   | 5224.9434  | 5285.6565   |           |
| 340.6808               | -15920.7522 | -1718.5074 | 0.0000      | 0.0000    |

## Supplementary Text 6

|                        |             |            |             |           |
|------------------------|-------------|------------|-------------|-----------|
| 7561.1560              | 3974.8609   | 302.4840   | -3586.2951  | 4034.2226 |
| 305.9247               | 20.8889     | 10.7230    | 656151.2420 | -24.4692  |
| -24.4848               |             |            |             |           |
| [18854]ENERGY: 5300000 | 3167.2885   | 5149.8281  | 5247.4082   |           |
| 337.6953               | -15783.8641 | -1730.3146 | 0.0000      | 0.0000    |
| 7586.8491              | 3974.8906   | 303.5119   | -3611.9585  | 4033.7841 |
| 305.7786               | -80.8809    | -90.5077   | 656151.2420 | -23.5746  |
| -23.5634               |             |            |             |           |
| [18904]ENERGY: 5310000 | 3123.9620   | 5225.8544  | 5273.7932   |           |
| 347.7182               | -15852.6327 | -1764.1475 | 0.0000      | 0.0000    |
| 7619.3772              | 3973.9248   | 304.8132   | -3645.4524  | 4034.2408 |
| 305.7866               | 64.1323     | 1.4906     | 656151.2420 | -22.3961  |
| -22.4003               |             |            |             |           |
| [18940]ENERGY: 5320000 | 3212.7222   | 5226.3877  | 5231.0358   |           |
| 323.7248               | -15763.4298 | -1834.4573 | 0.0000      | 0.0000    |
| 7579.4491              | 3975.4324   | 303.2159   | -3604.0166  | 4033.7732 |
| 305.7586               | 14.0129     | -39.1610   | 656151.2420 | -24.3697  |
| -24.3736               |             |            |             |           |
| [18990]ENERGY: 5330000 | 3270.1258   | 5095.9913  | 5300.5615   |           |
| 324.0938               | -15804.7473 | -1841.1576 | 0.0000      | 0.0000    |
| 7628.0825              | 3972.9500   | 305.1614   | -3655.1325  | 4034.7505 |
| 305.9384               | -133.7306   | -143.6081  | 656151.2420 | -21.5136  |
| -21.5201               |             |            |             |           |
| [19026]ENERGY: 5340000 | 3181.8473   | 5155.8343  | 5278.0486   |           |
| 344.9045               | -15874.1000 | -1716.2399 | 0.0000      | 0.0000    |
| 7602.2998              | 3972.5947   | 304.1300   | -3629.7050  | 4033.2120 |
| 305.9797               | 31.1183     | -24.5959   | 656151.2420 | -25.2041  |
| -25.1904               |             |            |             |           |
| [19076]ENERGY: 5350000 | 3178.7779   | 5172.0578  | 5331.0283   |           |
| 339.9221               | -15928.5696 | -1711.8242 | 0.0000      | 0.0000    |
| 7592.9712              | 3974.3636   | 303.7568   | -3618.6076  | 4035.0326 |
| 305.9378               | -9.5857     | -62.6514   | 656151.2420 | -24.0294  |
| -24.0378               |             |            |             |           |
| [19112]ENERGY: 5360000 | 3181.3131   | 5177.4012  | 5191.2007   |           |
| 321.1465               | -15771.4372 | -1721.5037 | 0.0000      | 0.0000    |
| 7597.5157              | 3975.6362   | 303.9386   | -3621.8794  | 4035.6083 |
| 305.7438               | -12.5216    | -50.7587   | 656151.2420 | -24.9546  |
| -24.9303               |             |            |             |           |
| [19162]ENERGY: 5370000 | 3190.1570   | 5192.8220  | 5225.2504   |           |
| 336.7664               | -15872.3289 | -1731.8237 | 0.0000      | 0.0000    |
| 7631.8505              | 3972.6936   | 305.3122   | -3659.1569  | 4033.9296 |
| 305.9785               | -41.3686    | -63.1677   | 656151.2420 | -25.9083  |
| -25.9217               |             |            |             |           |
| [19198]ENERGY: 5380000 | 3146.5641   | 5238.3621  | 5276.1244   |           |
| 336.5572               | -15955.3125 | -1691.0714 | 0.0000      | 0.0000    |
| 7621.1258              | 3972.3497   | 304.8831   | -3648.7761  | 4034.4009 |
| 305.8383               | 81.4687     | 25.3928    | 656151.2420 | -26.1792  |
| -26.1936               |             |            |             |           |
| [19248]ENERGY: 5390000 | 3155.8455   | 5256.1507  | 5209.4157   |           |
| 364.9621               | -15769.3655 | -1885.2404 | 0.0000      | 0.0000    |
| 7639.7696              | 3971.5377   | 305.6290   | -3668.2318  | 4036.2388 |
| 305.9971               | -19.6644    | -82.9745   | 656151.2420 | -23.0983  |
| -23.1058               |             |            |             |           |
| [19287]ENERGY: 5400000 | 3166.3134   | 5136.4964  | 5297.9878   |           |

Supplementary Text 6

|                        |             |            |             |           |
|------------------------|-------------|------------|-------------|-----------|
| 319.2711               | -15788.4763 | -1826.4105 | 0.0000      | 0.0000    |
| 7667.6820              | 3972.8638   | 306.7456   | -3694.8182  | 4035.4676 |
| 305.9338               | 5.0331      | 6.7812     | 656151.2420 | -25.5772  |
| -25.5579               |             |            |             |           |
| [19337]ENERGY: 5410000 | 3169.1842   | 5176.2620  | 5238.8317   |           |
| 335.5477               | -15804.4942 | -1837.2630 | 0.0000      | 0.0000    |
| 7696.8598              | 3974.9282   | 307.9129   | -3721.9316  | 4036.9932 |
| 305.9553               | -67.7119    | -94.6837   | 656151.2420 | -22.2445  |
| -22.2640               |             |            |             |           |
| [19373]ENERGY: 5420000 | 3145.2432   | 5136.6696  | 5297.1236   |           |
| 299.3874               | -15905.9517 | -1708.1172 | 0.0000      | 0.0000    |
| 7707.8310              | 3972.1858   | 308.3518   | -3735.6451  | 4035.6256 |
| 305.7929               | -77.9903    | -160.5312  | 656151.2420 | -26.4235  |
| -26.4247               |             |            |             |           |
| [19423]ENERGY: 5430000 | 3140.2903   | 5074.1761  | 5273.3291   |           |
| 358.4340               | -15857.9505 | -1760.4540 | 0.0000      | 0.0000    |
| 7742.8725              | 3970.6977   | 309.7536   | -3772.1748  | 4036.5605 |
| 305.6028               | -65.6603    | -5.3075    | 656151.2420 | -30.4428  |
| -30.4108               |             |            |             |           |
| [19459]ENERGY: 5440000 | 3265.7792   | 5118.7152  | 5261.8910   |           |
| 350.4736               | -15860.0969 | -1779.9859 | 0.0000      | 0.0000    |
| 7620.0205              | 3976.7967   | 304.8389   | -3643.2238  | 4037.3175 |
| 305.7287               | -63.6991    | -70.3165   | 656151.2420 | -27.0755  |
| -27.0822               |             |            |             |           |
| [19509]ENERGY: 5450000 | 3228.6539   | 5101.8554  | 5260.5614   |           |
| 333.3797               | -15875.9572 | -1780.3932 | 0.0000      | 0.0000    |
| 7706.5697              | 3974.6697   | 308.3013   | -3731.9000  | 4036.5775 |
| 305.9566               | -12.3256    | -27.9286   | 656151.2420 | -24.8118  |
| -24.8303               |             |            |             |           |
| [19545]ENERGY: 5460000 | 3191.4190   | 5214.4751  | 5290.8541   |           |
| 302.0145               | -15841.3914 | -1782.1074 | 0.0000      | 0.0000    |
| 7604.1669              | 3979.4307   | 304.2047   | -3624.7362  | 4038.5457 |
| 305.7808               | 31.9217     | -58.9675   | 656151.2420 | -31.6386  |
| -31.6322               |             |            |             |           |
| [19595]ENERGY: 5470000 | 3160.9887   | 5115.4261  | 5252.7743   |           |
| 295.1969               | -15849.1351 | -1748.2386 | 0.0000      | 0.0000    |
| 7746.3773              | 3973.3896   | 309.8938   | -3772.9877  | 4036.9010 |
| 305.8893               | 18.0002     | 36.3108    | 656151.2420 | -22.6757  |
| -22.6638               |             |            |             |           |
| [19631]ENERGY: 5480000 | 3093.3623   | 5160.2226  | 5255.5871   |           |
| 339.7621               | -15825.4396 | -1747.2108 | 0.0000      | 0.0000    |
| 7695.9067              | 3972.1906   | 307.8747   | -3723.7161  | 4037.3313 |
| 306.0344               | 135.1180    | 84.3821    | 656151.2420 | -24.1087  |
| -24.1068               |             |            |             |           |
| [19681]ENERGY: 5490000 | 3185.4644   | 5256.5309  | 5246.3512   |           |
| 345.1009               | -15886.9751 | -1758.7991 | 0.0000      | 0.0000    |
| 7586.4750              | 3974.1482   | 303.4969   | -3612.3267  | 4037.3573 |
| 306.0428               | -69.8316    | -7.4686    | 656151.2420 | -24.4207  |
| -24.4322               |             |            |             |           |
| [19720]ENERGY: 5500000 | 3149.7604   | 5150.3698  | 5242.7323   |           |
| 331.9755               | -15798.9719 | -1744.6900 | 0.0000      | 0.0000    |
| 7643.8966              | 3975.0726   | 305.7941   | -3668.8240  | 4038.2961 |
| 306.0046               | 65.4669     | 49.8184    | 656151.2420 | -20.9782  |
| -20.9742               |             |            |             |           |

## Supplementary Text 6

|                        |             |            |             |           |
|------------------------|-------------|------------|-------------|-----------|
| [19770]ENERGY: 5510000 | 3215.3265   | 5105.9774  | 5253.0037   |           |
| 316.1094               | -15780.2642 | -1746.3921 | 0.0000      | 0.0000    |
| 7614.5596              | 3978.3202   | 304.6205   | -3636.2394  | 4038.5159 |
| 305.9300               | -147.2035   | -136.8776  | 656151.2420 | -27.7647  |
| -27.7809               |             |            |             |           |
| [19806]ENERGY: 5520000 | 3154.0611   | 5125.8049  | 5308.2136   |           |
| 343.7785               | -15878.7002 | -1763.8715 | 0.0000      | 0.0000    |
| 7683.1491              | 3972.4354   | 307.3644   | -3710.7137  | 4038.8594 |
| 305.8410               | -111.4880   | -123.7228  | 656151.2420 | -26.2980  |
| -26.2799               |             |            |             |           |
| [19856]ENERGY: 5530000 | 3130.5165   | 5152.7117  | 5278.9242   |           |
| 331.6190               | -15864.2439 | -1681.7424 | 0.0000      | 0.0000    |
| 7631.1603              | 3978.9454   | 305.2846   | -3652.2149  | 4039.1719 |
| 305.8759               | -77.3963    | -18.0149   | 656151.2420 | -22.0837  |
| -22.0742               |             |            |             |           |
| [19892]ENERGY: 5540000 | 3192.3922   | 5248.7017  | 5247.1145   |           |
| 349.1190               | -15889.6828 | -1741.5368 | 0.0000      | 0.0000    |
| 7570.6723              | 3976.7802   | 302.8647   | -3593.8921  | 4039.5802 |
| 306.0003               | -28.7498    | -41.0214   | 656151.2420 | -27.3188  |
| -27.3375               |             |            |             |           |
| [19942]ENERGY: 5550000 | 3168.0216   | 5211.3282  | 5270.0686   |           |
| 317.8744               | -15884.1587 | -1701.8084 | 0.0000      | 0.0000    |
| 7599.5367              | 3980.8624   | 304.0195   | -3618.6743  | 4040.8790 |
| 306.0582               | 74.6785     | -14.0880   | 656151.2420 | -22.0504  |
| -22.0588               |             |            |             |           |
| [19978]ENERGY: 5560000 | 3252.3826   | 5152.9032  | 5278.2935   |           |
| 355.8212               | -15922.6419 | -1752.6517 | 0.0000      | 0.0000    |
| 7618.4488              | 3982.5557   | 304.7760   | -3635.8931  | 4041.4216 |
| 305.8619               | -12.7704    | -14.3815   | 656151.2420 | -29.5597  |
| -29.5413               |             |            |             |           |
| [20028]ENERGY: 5570000 | 3213.7138   | 5169.5587  | 5244.1601   |           |
| 335.8094               | -15876.6168 | -1745.4839 | 0.0000      | 0.0000    |
| 7637.7131              | 3978.8544   | 305.5467   | -3658.8587  | 4040.9768 |
| 306.0062               | -36.4419    | -116.1500  | 656151.2420 | -21.0679  |
| -21.0709               |             |            |             |           |
| [20064]ENERGY: 5580000 | 3146.7167   | 5301.5689  | 5283.1177   |           |
| 332.4767               | -15894.8164 | -1768.9713 | 0.0000      | 0.0000    |
| 7581.5183              | 3981.6107   | 303.2986   | -3599.9077  | 4041.2099 |
| 306.0391               | 27.6002     | 49.5842    | 656151.2420 | -19.7210  |
| -19.7326               |             |            |             |           |
| [20114]ENERGY: 5590000 | 3171.5731   | 5298.4523  | 5281.1068   |           |
| 348.4924               | -15900.1785 | -1801.6182 | 0.0000      | 0.0000    |
| 7580.5932              | 3978.4212   | 303.2616   | -3602.1720  | 4039.9234 |
| 306.0774               | -131.1123   | -100.5881  | 656151.2420 | -24.5184  |
| -24.5096               |             |            |             |           |
| [20153]ENERGY: 5600000 | 3135.2847   | 5224.8862  | 5280.4264   |           |
| 334.1923               | -15867.9717 | -1803.8782 | 0.0000      | 0.0000    |
| 7673.1238              | 3976.0634   | 306.9633   | -3697.0603  | 4041.6010 |
| 306.1531               | 5.1193      | 14.7656    | 656151.2420 | -25.1304  |
| -25.1448               |             |            |             |           |
| [20203]ENERGY: 5610000 | 3148.6022   | 5156.7258  | 5301.4104   |           |
| 314.2288               | -15802.3441 | -1760.9053 | 0.0000      | 0.0000    |
| 7620.4274              | 3978.1451   | 304.8552   | -3642.2823  | 4040.7574 |
| 306.0918               | -5.8461     | -49.4410   | 656151.2420 | -23.4273  |

Supplementary Text 6

-23.4179  
 [20239]ENERGY: 5620000      3179.9507      5270.1194      5263.5230  
 349.9271      -15868.7335      -1812.7158      0.0000      0.0000  
 7596.6304      3978.7011      303.9032      -3617.9293      4040.7007  
 306.2324      -74.7203      -67.9415      656151.2420      -23.7587  
 -23.7484  
 [20289]ENERGY: 5630000      3179.9887      5162.4548      5266.4553  
 343.6334      -15843.6608      -1759.2683      0.0000      0.0000  
 7630.9399      3980.5430      305.2757      -3650.3969      4040.6032  
 306.0883      -55.6313      -153.6231      656151.2420      -20.8602  
 -20.8789  
 [20325]ENERGY: 5640000      3241.4897      5192.9664      5298.9738  
 347.7105      -15852.2278      -1796.8459      0.0000      0.0000  
 7552.6315      3984.6982      302.1430      -3567.9333      4042.1056  
 305.8833      49.6864      72.9737      656151.2420      -25.5953  
 -25.5686  
 [20375]ENERGY: 5650000      3134.4371      5155.3528      5260.5916  
 365.4742      -15840.7666      -1767.6368      0.0000      0.0000  
 7669.3817      3976.8339      306.8136      -3692.5478      4042.2149  
 305.9730      78.0471      -2.7049      656151.2420      -23.3546  
 -23.3873  
 [20411]ENERGY: 5660000      3173.2616      5202.8410      5283.6991  
 330.3215      -15821.1086      -1797.4124      0.0000      0.0000  
 7610.4192      3982.0215      304.4548      -3628.3978      4043.1579  
 306.1895      124.4804      29.7265      656151.2420      -23.6600  
 -23.6406  
 [20461]ENERGY: 5670000      3227.5374      5206.2502      5263.2681  
 366.2294      -15950.5504      -1795.9266      0.0000      0.0000  
 7663.7924      3980.6007      306.5900      -3683.1917      4041.4150  
 306.1137      22.8823      -123.6637      656151.2420      -23.1201  
 -23.1265  
 [20497]ENERGY: 5680000      3152.4441      5134.3293      5269.0103  
 344.3719      -15764.3185      -1744.6785      0.0000      0.0000  
 7590.2820      3981.4407      303.6492      -3608.8413      4042.5127  
 306.0870      101.9973      -7.9829      656151.2420      -23.7786  
 -23.7732  
 [20547]ENERGY: 5690000      3239.2483      5099.3349      5250.0110  
 317.4759      -15837.1245      -1782.2785      0.0000      0.0000  
 7690.8427      3977.5098      307.6722      -3713.3330      4041.3516  
 306.0412      -67.9032      -103.6703      656151.2420      -22.5705  
 -22.5715  
 [20586]ENERGY: 5700000      3158.2963      5241.6821      5253.9275  
 332.5444      -15837.3701      -1802.0147      0.0000      0.0000  
 7636.2856      3983.3510      305.4896      -3652.9345      4043.1541  
 306.1375      54.8913      4.5473      656151.2420      -26.8068  
 -26.8059  
 [20636]ENERGY: 5710000      3169.8321      5187.8248      5233.2563  
 358.4793      -15843.9715      -1782.2379      0.0000      0.0000  
 7658.5697      3981.7529      306.3811      -3676.8169      4043.7311  
 306.1768      30.7208      58.0330      656151.2420      -25.5856  
 -25.5745  
 [20672]ENERGY: 5720000      3222.0498      5174.3553      5269.0354  
 346.3431      -15857.7525      -1816.1742      0.0000      0.0000  
 7646.9191      3984.7760      305.9150      -3662.1431      4044.9151

## Supplementary Text 6

|                        |             |            |             |           |
|------------------------|-------------|------------|-------------|-----------|
| 306.0550               | 18.4719     | -38.1766   | 656151.2420 | -28.4631  |
| -28.4772               |             |            |             |           |
| [20722]ENERGY: 5730000 | 3092.5506   | 5097.1239  | 5221.7163   |           |
| 339.1938               | -15754.9977 | -1729.9463 | 0.0000      | 0.0000    |
| 7714.2352              | 3979.8759   | 308.6080   | -3734.3593  | 4043.5975 |
| 305.9729               | 96.2272     | -38.2259   | 656151.2420 | -24.4466  |
| -24.4395               |             |            |             |           |
| [20758]ENERGY: 5740000 | 3198.6029   | 5168.4589  | 5277.7484   |           |
| 326.1789               | -15852.6332 | -1781.7885 | 0.0000      | 0.0000    |
| 7647.2908              | 3983.8581   | 305.9299   | -3663.4327  | 4044.2270 |
| 305.8980               | 32.2083     | 26.2651    | 656151.2420 | -26.3674  |
| -26.3773               |             |            |             |           |
| [20808]ENERGY: 5750000 | 3198.3646   | 5257.3160  | 5233.8480   |           |
| 343.4723               | -15935.2057 | -1766.8724 | 0.0000      | 0.0000    |
| 7651.7825              | 3982.7053   | 306.1096   | -3669.0772  | 4045.5052 |
| 305.9020               | -62.1947    | -82.3958   | 656151.2420 | -20.8511  |
| -20.8397               |             |            |             |           |
| [20844]ENERGY: 5760000 | 3196.1811   | 5189.3396  | 5218.2864   |           |
| 330.1970               | -15797.7549 | -1737.4885 | 0.0000      | 0.0000    |
| 7588.8986              | 3987.6592   | 303.5939   | -3601.2393  | 4045.6289 |
| 306.0830               | 98.8994     | -58.5432   | 656151.2420 | -22.5629  |
| -22.5765               |             |            |             |           |
| [20894]ENERGY: 5770000 | 3099.5191   | 5253.5714  | 5238.7187   |           |
| 299.8851               | -15809.9661 | -1775.4653 | 0.0000      | 0.0000    |
| 7674.5670              | 3980.8299   | 307.0211   | -3693.7371  | 4045.5821 |
| 305.9901               | 7.9276      | -91.6755   | 656151.2420 | -25.4880  |
| -25.4774               |             |            |             |           |
| [20930]ENERGY: 5780000 | 3206.2841   | 5177.8624  | 5293.2648   |           |
| 338.0012               | -15819.7322 | -1801.8514 | 0.0000      | 0.0000    |
| 7589.8696              | 3983.6986   | 303.6327   | -3606.1710  | 4045.3876 |
| 305.9922               | 51.2266     | 11.3004    | 656151.2420 | -19.3276  |
| -19.3291               |             |            |             |           |
| [20980]ENERGY: 5790000 | 3093.8700   | 5192.4966  | 5338.7204   |           |
| 359.1280               | -15886.8889 | -1712.0151 | 0.0000      | 0.0000    |
| 7599.8541              | 3985.1651   | 304.0322   | -3614.6890  | 4045.2421 |
| 305.9311               | 84.0400     | 19.5446    | 656151.2420 | -19.9863  |
| -19.9886               |             |            |             |           |
| [21019]ENERGY: 5800000 | 3219.2335   | 5063.7620  | 5284.0235   |           |
| 348.2246               | -15837.5313 | -1774.3114 | 0.0000      | 0.0000    |
| 7678.9620              | 3982.3630   | 307.1969   | -3696.5990  | 4044.1996 |
| 305.8864               | 95.6644     | -30.3541   | 656151.2420 | -27.6575  |
| -27.6601               |             |            |             |           |
| [21069]ENERGY: 5810000 | 3097.2558   | 5214.0416  | 5253.9911   |           |
| 354.8247               | -15839.0107 | -1696.2885 | 0.0000      | 0.0000    |
| 7598.5074              | 3983.3215   | 303.9783   | -3615.1859  | 4046.0763 |
| 305.9791               | 146.8631    | 53.8540    | 656151.2420 | -22.5450  |
| -22.5367               |             |            |             |           |
| [21105]ENERGY: 5820000 | 3215.7642   | 5134.6891  | 5290.2222   |           |
| 344.0955               | -15913.3608 | -1758.2517 | 0.0000      | 0.0000    |
| 7669.5530              | 3982.7115   | 306.8205   | -3686.8415  | 4045.2727 |
| 305.9188               | -141.1296   | -124.9248  | 656151.2420 | -27.2014  |
| -27.2065               |             |            |             |           |
| [21155]ENERGY: 5830000 | 3116.6700   | 5098.9824  | 5303.0023   |           |
| 353.1536               | -15888.6682 | -1739.7809 | 0.0000      | 0.0000    |

## Supplementary Text 6

|                        |             |            |             |           |
|------------------------|-------------|------------|-------------|-----------|
| 7738.7684              | 3982.1274   | 309.5894   | -3756.6410  | 4044.9616 |
| 305.9576               | -57.3532    | -141.1580  | 656151.2420 | -27.1789  |
| -27.1717               |             |            |             |           |
| [21191]ENERGY: 5840000 | 3207.2782   | 5163.7264  | 5268.1580   |           |
| 337.4436               | -15836.0569 | -1771.5575 | 0.0000      | 0.0000    |
| 7615.7560              | 3984.7479   | 304.6683   | -3631.0081  | 4045.8524 |
| 306.0429               | 28.5814     | 29.9045    | 656151.2420 | -23.2215  |
| -23.2305               |             |            |             |           |
| [21241]ENERGY: 5850000 | 3281.6380   | 5134.2892  | 5274.4082   |           |
| 345.3073               | -15825.5516 | -1829.0780 | 0.0000      | 0.0000    |
| 7606.2810              | 3987.2941   | 304.2893   | -3618.9869  | 4047.0929 |
| 305.9660               | -153.9742   | -142.1350  | 656151.2420 | -28.3344  |
| -28.3432               |             |            |             |           |
| [21277]ENERGY: 5860000 | 3202.9386   | 5156.6572  | 5264.0379   |           |
| 337.8957               | -15878.3157 | -1777.1865 | 0.0000      | 0.0000    |
| 7677.3597              | 3983.3870   | 307.1328   | -3693.9727  | 4045.9898 |
| 305.9581               | 42.3763     | 17.4283    | 656151.2420 | -24.2852  |
| -24.2761               |             |            |             |           |
| [21327]ENERGY: 5870000 | 3180.4919   | 5187.4406  | 5267.3858   |           |
| 321.9872               | -15845.0975 | -1768.0884 | 0.0000      | 0.0000    |
| 7641.0412              | 3985.1607   | 305.6798   | -3655.8804  | 4045.5380 |
| 305.8141               | -94.8630    | -144.4066  | 656151.2420 | -20.6279  |
| -20.6262               |             |            |             |           |
| [21363]ENERGY: 5880000 | 3081.4789   | 5195.9813  | 5255.2805   |           |
| 325.5165               | -15843.0894 | -1736.8585 | 0.0000      | 0.0000    |
| 7702.6321              | 3980.9414   | 308.1438   | -3721.6907  | 4045.1255 |
| 305.7541               | 93.3082     | 83.0611    | 656151.2420 | -27.8005  |
| -27.8150               |             |            |             |           |
| [21413]ENERGY: 5890000 | 3180.3516   | 5178.9930  | 5253.6605   |           |
| 331.8655               | -15828.0557 | -1797.2288 | 0.0000      | 0.0000    |
| 7662.5241              | 3982.1103   | 306.5393   | -3680.4138  | 4044.4146 |
| 305.9903               | -112.0761   | -119.4224  | 656151.2420 | -23.9206  |
| -23.8851               |             |            |             |           |
| [21452]ENERGY: 5900000 | 3114.4136   | 5195.0819  | 5255.0235   |           |
| 335.1840               | -15850.9358 | -1736.8622 | 0.0000      | 0.0000    |
| 7670.3638              | 3982.2688   | 306.8529   | -3688.0950  | 4045.1137 |
| 305.9371               | 40.8257     | 43.2863    | 656151.2420 | -26.9955  |
| -27.0249               |             |            |             |           |
| [21502]ENERGY: 5910000 | 3194.0473   | 5181.2221  | 5296.8055   |           |
| 330.6105               | -15913.8349 | -1709.9812 | 0.0000      | 0.0000    |
| 7604.5895              | 3983.4587   | 304.2216   | -3621.1308  | 4046.0290 |
| 305.9569               | 53.3629     | 33.5722    | 656151.2420 | -22.5040  |
| -22.4883               |             |            |             |           |
| [21538]ENERGY: 5920000 | 3174.0491   | 5178.4932  | 5281.5619   |           |
| 360.6166               | -15866.6275 | -1756.1651 | 0.0000      | 0.0000    |
| 7609.6732              | 3981.6015   | 304.4250   | -3628.0717  | 4046.0181 |
| 305.9287               | 71.4280     | 76.1633    | 656151.2420 | -22.9191  |
| -22.9173               |             |            |             |           |
| [21588]ENERGY: 5930000 | 3146.5462   | 5113.8473  | 5261.9836   |           |
| 329.4647               | -15798.8045 | -1757.6360 | 0.0000      | 0.0000    |
| 7689.9575              | 3985.3588   | 307.6367   | -3704.5987  | 4045.9109 |
| 306.0376               | -36.2126    | 1.6630     | 656151.2420 | -21.5961  |
| -21.5973               |             |            |             |           |
| [21624]ENERGY: 5940000 | 3222.9384   | 5120.6813  | 5307.6288   |           |



## Supplementary Text 6

|                        |             |             |             |           |
|------------------------|-------------|-------------|-------------|-----------|
| 323.1400               | -15816.3957 | -1809.3500  | 0.0000      | 0.0000    |
| 7633.5339              | 3982.1767   | 305.3795    | -3651.3572  | 4046.7728 |
| 306.1075               | -73.8836    | -106.3432   | 656151.2420 | -19.8085  |
| -19.8117               |             |             |             |           |
| [21674]ENERGY: 5950000 | 3235.2986   | 5018.2439   | 5247.9051   |           |
| 310.1902               | -15667.2055 | -1806.5743  | 0.0000      | 0.0000    |
| 7642.6049              | 3980.4629   | 305.7424    | -3662.1419  | 4046.6329 |
| 305.9254               | -147.2697   | -163.2953   | 656151.2420 | -27.6309  |
| -27.6369               |             |             |             |           |
| [21710]ENERGY: 5960000 | 3226.5964   | 5087.5350   | 5248.6399   |           |
| 347.5611               | -15840.0608 | -1774.5176  | 0.0000      | 0.0000    |
| 7690.7268              | 3986.4809   | 307.6675    | -3704.2459  | 4045.9943 |
| 305.9764               | -56.8180    | -78.4330    | 656151.2420 | -19.4644  |
| -19.4562               |             |             |             |           |
| [21760]ENERGY: 5970000 | 3179.0032   | 5183.6683   | 5268.0628   |           |
| 327.4675               | -15896.9318 | -1781.0174  | 0.0000      | 0.0000    |
| 7702.1145              | 3982.3672   | 308.1231    | -3719.7473  | 4046.4508 |
| 305.9259               | -79.5512    | -79.5261    | 656151.2420 | -26.5800  |
| -26.5947               |             |             |             |           |
| [21796]ENERGY: 5980000 | 3164.1631   | 5208.4186   | 5253.1509   |           |
| 334.1454               | -15859.9356 | -1789.3062  | 0.0000      | 0.0000    |
| 7673.4282              | 3984.0643   | 306.9755    | -3689.3639  | 4046.5335 |
| 306.0189               | 119.7971    | 29.6729     | 656151.2420 | -25.0255  |
| -25.0273               |             |             |             |           |
| [21846]ENERGY: 5990000 | 3166.7773   | 5236.5826   | 5207.5239   |           |
| 350.5085               | -15822.8934 | -1811.9827  | 0.0000      | 0.0000    |
| 7659.5746              | 3986.0908   | 306.4213    | -3673.4838  | 4047.0916 |
| 305.8896               | -63.2836    | -114.6673   | 656151.2420 | -20.5205  |
| -20.5059               |             |             |             |           |
| [21885]ENERGY: 6000000 | 3214.8587   | 5203.1279   | 5251.4972   |           |
| 337.0106               | -15864.9482 | -1821.5074  | 0.0000      | 0.0000    |
| 7664.1357              | 3984.1745   | 306.6037    | -3679.9611  | 4048.6080 |
| 305.9857               | 40.1487     | -14.9110    | 656151.2420 | -26.1752  |
| -26.1745               |             |             |             |           |
| [269]ENERGY: 6010000   | 3205.4871   | 5226.0774   | 5246.3142   | 330.7224  |
| -15859.9301            | -1811.7618  | 0.0000      | 0.0000      | 7649.5096 |
| 3986.4188              | 306.0186    | -3663.0909  | 4047.0334   | 305.9160  |
| -154.6696              | -210.7610   | 656151.2420 | -20.4726    | -20.4877  |
| [308]ENERGY: 6020000   | 3100.2048   | 5221.3589   | 5293.6319   | 325.2728  |
| -15830.3539            | -1750.4830  | 0.0000      | 0.0000      | 7626.5651 |
| 3986.1966              | 305.1007    | -3640.3684  | 4047.8077   | 305.9052  |
| 154.9497               | 77.4490     | 656151.2420 | -22.9825    | -22.9629  |
| [360]ENERGY: 6030000   | 3075.9574   | 5168.5804   | 5245.3407   | 330.8950  |
| -15780.9250            | -1786.1180  | 0.0000      | 0.0000      | 7732.8945 |
| 3986.6249              | 309.3544    | -3746.2696  | 4048.0536   | 305.8227  |
| 23.6603                | -25.1819    | 656151.2420 | -23.5038    | -23.5146  |
| [398]ENERGY: 6040000   | 3158.7682   | 5107.6497   | 5329.6173   | 368.0921  |
| -15780.3176            | -1756.5007  | 0.0000      | 0.0000      | 7562.5661 |
| 3989.8751              | 302.5405    | -3572.6910  | 4047.4741   | 305.9919  |
| 76.2838                | -13.7040    | 656151.2420 | -19.4065    | -19.4066  |
| [450]ENERGY: 6050000   | 3186.5968   | 5229.6870   | 5275.8576   | 344.0884  |
| -15850.4331            | -1779.5574  | 0.0000      | 0.0000      | 7584.2238 |
| 3990.4630              | 303.4069    | -3593.7608  | 4048.1370   | 305.8632  |
| -174.2035              | -159.2081   | 656151.2420 | -28.2877    | -28.3044  |

## Supplementary Text 6

|                       |             |             |             |           |
|-----------------------|-------------|-------------|-------------|-----------|
| [488]ENERGY: 6060000  | 3196.9129   | 5145.3340   | 5248.2817   | 319.6035  |
| -15837.3809           | -1755.2690  | 0.0000      | 0.0000      | 7668.0465 |
| 3985.5286             | 306.7602    | -3682.5179  | 4047.8607   | 305.9026  |
| -14.0183              | -71.7402    | 656151.2420 | -19.2153    | -19.1976  |
| [539]ENERGY: 6070000  | 3145.9140   | 5222.7323   | 5250.4812   | 347.8123  |
| -15836.1139           | -1809.8600  | 0.0000      | 0.0000      | 7661.5246 |
| 3982.4906             | 306.4993    | -3679.0341  | 4047.7544   | 305.9101  |
| -127.3552             | -132.5014   | 656151.2420 | -25.8553    | -25.8700  |
| [576]ENERGY: 6080000  | 3178.2014   | 5066.3197   | 5252.6870   | 338.3305  |
| -15834.5970           | -1671.6615  | 0.0000      | 0.0000      | 7655.8569 |
| 3985.1370             | 306.2726    | -3670.7199  | 4047.2334   | 306.0852  |
| -29.8889              | 3.5183      | 656151.2420 | -19.0088    | -18.9927  |
| [627]ENERGY: 6090000  | 3217.7221   | 5221.9934   | 5290.2059   | 342.6304  |
| -15923.4223           | -1750.2821  | 0.0000      | 0.0000      | 7591.3212 |
| 3990.1687             | 303.6908    | -3601.1525  | 4049.4452   | 306.1867  |
| 57.7866               | 1.7184      | 656151.2420 | -24.9620    | -24.9585  |
| [667]ENERGY: 6100000  | 3177.8788   | 5084.2730   | 5275.5293   | 349.4836  |
| -15775.1835           | -1756.5042  | 0.0000      | 0.0000      | 7632.0710 |
| 3987.5480             | 305.3210    | -3644.5230  | 4048.3862   | 306.0928  |
| -92.3749              | -123.9169   | 656151.2420 | -22.5185    | -22.5375  |
| [718]ENERGY: 6110000  | 3263.3047   | 5157.3931   | 5288.8378   | 322.3194  |
| -15846.4404           | -1864.4497  | 0.0000      | 0.0000      | 7667.6077 |
| 3988.5725             | 306.7426    | -3679.0352  | 4050.0585   | 306.0323  |
| -91.4519              | -96.0166    | 656151.2420 | -24.9551    | -24.9465  |
| [754]ENERGY: 6120000  | 3180.6249   | 5271.6129   | 5289.7562   | 320.5576  |
| -16026.0604           | -1713.4342  | 0.0000      | 0.0000      | 7666.2540 |
| 3989.3109             | 306.6885    | -3676.9431  | 4051.3767   | 306.0983  |
| 68.5503               | 42.0304     | 656151.2420 | -24.1294    | -24.1261  |
| [804]ENERGY: 6130000  | 3254.5858   | 5238.5614   | 5283.9341   | 316.3139  |
| -15870.1861           | -1812.9174  | 0.0000      | 0.0000      | 7581.6681 |
| 3991.9599             | 303.3046    | -3589.7083  | 4051.4547   | 306.2822  |
| -147.1473             | -114.8592   | 656151.2420 | -22.9335    | -22.9393  |
| [840]ENERGY: 6140000  | 3127.0019   | 5262.2151   | 5207.0929   | 330.6533  |
| -15827.2077           | -1735.6521  | 0.0000      | 0.0000      | 7625.6789 |
| 3989.7825             | 305.0653    | -3635.8964  | 4050.9045   | 306.1223  |
| 247.4967              | 142.1579    | 656151.2420 | -22.6448    | -22.6480  |
| [890]ENERGY: 6150000  | 3195.3848   | 5280.3409   | 5260.8503   | 333.0434  |
| -15853.8689           | -1831.7035  | 0.0000      | 0.0000      | 7606.0022 |
| 3990.0492             | 304.2781    | -3615.9529  | 4050.4765   | 306.3193  |
| -100.8156             | -59.1583    | 656151.2420 | -23.4604    | -23.4515  |
| [926]ENERGY: 6160000  | 3230.8459   | 5194.7799   | 5227.9463   | 329.8402  |
| -15917.8349           | -1696.1387  | 0.0000      | 0.0000      | 7620.2021 |
| 3989.6408             | 304.8462    | -3630.5613  | 4050.0903   | 306.1764  |
| -18.1231              | -18.7695    | 656151.2420 | -26.5837    | -26.5811  |
| [976]ENERGY: 6170000  | 3128.8899   | 5210.2277   | 5284.9226   | 347.2839  |
| -15852.8129           | -1781.5800  | 0.0000      | 0.0000      | 7656.0570 |
| 3992.9884             | 306.2806    | -3663.0687  | 4050.7207   | 306.0535  |
| 19.5887               | 45.9608     | 656151.2420 | -21.7902    | -21.7869  |
| [1012]ENERGY: 6180000 | 3141.0684   | 5143.2280   | 5266.9248   |           |
| 339.7176              | -15814.9342 | -1768.7999  | 0.0000      | 0.0000    |
| 7681.7070             | 3988.9118   | 307.3067    | -3692.7952  | 4050.9918 |
| 306.2077              | 12.0865     | -60.3353    | 656151.2420 | -27.2328  |
| -27.2579              |             |             |             |           |
| [1062]ENERGY: 6190000 | 3215.2091   | 5201.8003   | 5316.0368   |           |

## Supplementary Text 6

|                       |             |            |             |           |
|-----------------------|-------------|------------|-------------|-----------|
| 348.4701              | -15947.8174 | -1741.7950 | 0.0000      | 0.0000    |
| 7600.8610             | 3992.7649   | 304.0724   | -3608.0961  | 4050.2642 |
| 306.2663              | -118.5517   | -90.3740   | 656151.2420 | -22.4682  |
| -22.4357              |             |            |             |           |
| [1101]ENERGY: 6200000 | 3138.0362   | 5122.3801  | 5256.0582   |           |
| 347.3249              | -15771.0068 | -1764.5859 | 0.0000      | 0.0000    |
| 7659.9645             | 3988.1713   | 306.4369   | -3671.7932  | 4050.3403 |
| 306.1985              | 46.8985     | -16.8594   | 656151.2420 | -27.8560  |
| -27.8582              |             |            |             |           |
| [1151]ENERGY: 6210000 | 3189.0442   | 5261.6703  | 5266.8238   |           |
| 330.7783              | -15821.8868 | -1800.5727 | 0.0000      | 0.0000    |
| 7566.0757             | 3991.9328   | 302.6809   | -3574.1429  | 4051.3098 |
| 306.1706              | 14.1242     | -30.5095   | 656151.2420 | -21.8605  |
| -21.8581              |             |            |             |           |
| [1187]ENERGY: 6220000 | 3210.2803   | 5155.1573  | 5262.7923   |           |
| 338.0054              | -15853.6979 | -1757.2513 | 0.0000      | 0.0000    |
| 7636.0071             | 3991.2932   | 305.4785   | -3644.7139  | 4050.4795 |
| 305.9743              | -62.6706    | -18.0572   | 656151.2420 | -26.5937  |
| -26.5889              |             |            |             |           |
| [1237]ENERGY: 6230000 | 3194.8777   | 5160.5176  | 5290.9710   |           |
| 337.0747              | -15938.7186 | -1727.7803 | 0.0000      | 0.0000    |
| 7670.5790             | 3987.5212   | 306.8615   | -3683.0579  | 4051.5654 |
| 306.1617              | 40.4001     | 58.2858    | 656151.2420 | -23.9352  |
| -23.9361              |             |            |             |           |
| [1273]ENERGY: 6240000 | 3080.3985   | 5183.6537  | 5253.6994   |           |
| 332.3696              | -15824.3676 | -1771.7452 | 0.0000      | 0.0000    |
| 7729.1848             | 3983.1932   | 309.2060   | -3745.9916  | 4052.2647 |
| 306.1055              | -40.2493    | -50.7206   | 656151.2420 | -22.7607  |
| -22.7721              |             |            |             |           |
| [1323]ENERGY: 6250000 | 3221.7154   | 5218.1775  | 5247.3835   |           |
| 337.1129              | -15859.2357 | -1831.0598 | 0.0000      | 0.0000    |
| 7655.1351             | 3989.2290   | 306.2437   | -3665.9062  | 4052.0702 |
| 306.0580              | -129.2490   | -106.2284  | 656151.2420 | -18.8525  |
| -18.8569              |             |            |             |           |
| [1359]ENERGY: 6260000 | 3268.9974   | 5139.6641  | 5278.9812   |           |
| 316.7260              | -15870.2968 | -1781.3740 | 0.0000      | 0.0000    |
| 7638.4195             | 3991.1174   | 305.5750   | -3647.3021  | 4051.7616 |
| 306.2032              | 41.3063     | 2.4560     | 656151.2420 | -25.4234  |
| -25.4218              |             |            |             |           |
| [1409]ENERGY: 6270000 | 3172.7575   | 5197.0240  | 5241.8909   |           |
| 300.3220              | -15803.1115 | -1780.2928 | 0.0000      | 0.0000    |
| 7659.0547             | 3987.6448   | 306.4005   | -3671.4099  | 4051.2166 |
| 305.9632              | -52.9999    | -92.9382   | 656151.2420 | -23.8583  |
| -23.8590              |             |            |             |           |
| [1445]ENERGY: 6280000 | 3211.7592   | 5126.6963  | 5252.2680   |           |
| 337.2441              | -15831.3652 | -1835.9622 | 0.0000      | 0.0000    |
| 7726.2059             | 3986.8461   | 309.0869   | -3739.3599  | 4051.3269 |
| 306.1369              | -67.5976    | -164.6507  | 656151.2420 | -21.4717  |
| -21.4812              |             |            |             |           |
| [1495]ENERGY: 6290000 | 3108.0051   | 5169.5197  | 5234.0504   |           |
| 339.0978              | -15877.8882 | -1745.5244 | 0.0000      | 0.0000    |
| 7756.2898             | 3983.5503   | 310.2904   | -3772.7395  | 4049.7457 |
| 306.1161              | 96.4496     | 125.9365   | 656151.2420 | -27.3303  |
| -27.3253              |             |            |             |           |

## Supplementary Text 6

|                       |             |            |             |           |
|-----------------------|-------------|------------|-------------|-----------|
| [1534]ENERGY: 6300000 | 3149.1164   | 5067.6607  | 5312.6936   |           |
| 336.2317              | -15855.0936 | -1737.0371 | 0.0000      | 0.0000    |
| 7714.5807             | 3988.1524   | 308.6218   | -3726.4283  | 4050.0951 |
| 306.1535              | 69.5163     | 5.3507     | 656151.2420 | -22.3819  |
| -22.3806              |             |            |             |           |
| [1584]ENERGY: 6310000 | 3208.3813   | 5144.4004  | 5226.5633   |           |
| 340.3632              | -15927.2209 | -1707.7919 | 0.0000      | 0.0000    |
| 7703.5669             | 3988.2622   | 308.1812   | -3715.3047  | 4050.7977 |
| 305.9698              | 105.1072    | 38.7032    | 656151.2420 | -22.0743  |
| -22.0575              |             |            |             |           |
| [1620]ENERGY: 6320000 | 3154.9165   | 5241.5656  | 5252.1772   |           |
| 361.8700              | -15877.3196 | -1734.1010 | 0.0000      | 0.0000    |
| 7588.7746             | 3987.8833   | 303.5889   | -3600.8913  | 4050.2800 |
| 305.9403              | -137.2198   | -99.6924   | 656151.2420 | -20.0056  |
| -20.0182              |             |            |             |           |
| [1670]ENERGY: 6330000 | 3187.0859   | 5225.0263  | 5239.6284   |           |
| 336.6146              | -15888.0631 | -1805.0533 | 0.0000      | 0.0000    |
| 7690.1684             | 3985.4072   | 307.6452   | -3704.7612  | 4050.5545 |
| 305.9782              | -81.9929    | -131.9671  | 656151.2420 | -25.9978  |
| -26.0130              |             |            |             |           |
| [1706]ENERGY: 6340000 | 3137.9674   | 5194.1154  | 5291.9670   |           |
| 329.3081              | -15813.5390 | -1807.2375 | 0.0000      | 0.0000    |
| 7656.1404             | 3988.7218   | 306.2839   | -3667.4186  | 4051.4278 |
| 306.1570              | -99.1609    | -80.2165   | 656151.2420 | -23.6629  |
| -23.6232              |             |            |             |           |
| [1756]ENERGY: 6350000 | 3192.0841   | 5228.3626  | 5266.3715   |           |
| 314.9046              | -15832.7964 | -1776.2826 | 0.0000      | 0.0000    |
| 7600.5264             | 3993.1702   | 304.0591   | -3607.3562  | 4052.8685 |
| 306.1125              | -145.8763   | -177.1465  | 656151.2420 | -25.9427  |
| -25.9633              |             |            |             |           |
| [1792]ENERGY: 6360000 | 3141.9885   | 5158.5645  | 5247.5046   |           |
| 316.7376              | -15783.4020 | -1810.2742 | 0.0000      | 0.0000    |
| 7718.1352             | 3989.2544   | 308.7640   | -3728.8809  | 4051.7160 |
| 306.0270              | -217.6379   | -177.8882  | 656151.2420 | -24.2997  |
| -24.3190              |             |            |             |           |
| [1842]ENERGY: 6370000 | 3084.3331   | 5240.5743  | 5278.9172   |           |
| 358.5080              | -15817.3453 | -1749.9658 | 0.0000      | 0.0000    |
| 7593.5160             | 3988.5375   | 303.7786   | -3604.9785  | 4051.9862 |
| 305.9048              | 95.7380     | 43.5331    | 656151.2420 | -24.0684  |
| -24.0571              |             |            |             |           |
| [1878]ENERGY: 6380000 | 3188.1541   | 5238.6517  | 5279.3352   |           |
| 337.8428              | -15836.9005 | -1786.2966 | 0.0000      | 0.0000    |
| 7570.5892             | 3991.3760   | 302.8614   | -3579.2132  | 4051.7946 |
| 305.9003              | -137.5141   | -68.9543   | 656151.2420 | -22.1344  |
| -22.1151              |             |            |             |           |
| [1928]ENERGY: 6390000 | 3200.6628   | 5199.9854  | 5214.6360   |           |
| 349.5172              | -15860.8173 | -1648.9978 | 0.0000      | 0.0000    |
| 7539.4508             | 3994.4372   | 301.6157   | -3545.0137  | 4052.4066 |
| 305.7370              | 144.6198    | 125.7761   | 656151.2420 | -21.7194  |
| -21.7423              |             |            |             |           |
| [1967]ENERGY: 6400000 | 3109.2512   | 5250.9647  | 5275.0742   |           |
| 338.9263              | -15875.0004 | -1753.5846 | 0.0000      | 0.0000    |
| 7646.1430             | 3991.7744   | 305.8839   | -3654.3686  | 4051.7434 |
| 305.7341              | 134.9246    | 79.9816    | 656151.2420 | -23.5161  |

Supplementary Text 6

-23.5044  
 [2017]ENERGY: 6410000      3146.7005      5132.6071      5278.0682  
 354.1562      -15814.1141      -1805.2744      0.0000      0.0000  
 7696.2372      3988.3806      307.8880      -3707.8566      4052.2163  
 305.9919      -153.4249      -155.1005      656151.2420      -17.2893  
 -17.2775  
 [2053]ENERGY: 6420000      3112.1208      5158.1043      5273.3350  
 335.3431      -15818.1087      -1761.9264      0.0000      0.0000  
 7690.5716      3989.4395      307.6613      -3701.1321      4053.6755  
 305.9414      217.2800      83.5660      656151.2420      -25.7665  
 -25.7938  
 [2103]ENERGY: 6430000      3129.9538      5140.4111      5286.3278  
 328.3085      -15816.3023      -1780.8644      0.0000      0.0000  
 7704.4154      3992.2500      308.2151      -3712.1655      4054.8107  
 305.9114      27.0870      -67.0794      656151.2420      -24.5557  
 -24.5501  
 [2139]ENERGY: 6440000      3206.2912      5168.8827      5282.8639  
 337.7410      -15844.2615      -1744.4731      0.0000      0.0000  
 7584.9052      3991.9494      303.4341      -3592.9558      4053.5969  
 306.1815      -118.6934      -50.9474      656151.2420      -20.9905  
 -20.9852  
 [2189]ENERGY: 6450000      3188.6296      5190.4901      5285.5613  
 337.4941      -15900.8922      -1758.6036      0.0000      0.0000  
 7648.2876      3990.9669      305.9697      -3657.3208      4054.2496  
 306.0746      -142.3077      -149.8469      656151.2420      -24.3247  
 -24.3203  
 [2225]ENERGY: 6460000      3198.1604      5198.1455      5303.3697  
 344.6309      -15926.3705      -1799.7067      0.0000      0.0000  
 7674.8615      3993.0908      307.0328      -3681.7706      4055.3471  
 306.2497      -158.1024      -138.9556      656151.2420      -25.0348  
 -25.0375  
 [2275]ENERGY: 6470000      3174.3166      5210.7977      5274.5026  
 351.6620      -15927.2845      -1806.0486      0.0000      0.0000  
 7713.7937      3991.7393      308.5903      -3722.0543      4055.2433  
 306.1798      23.4966      -53.2913      656151.2420      -28.5335  
 -28.5593  
 [2311]ENERGY: 6480000      3201.1573      5227.8901      5306.8628  
 330.1585      -15950.2114      -1675.6308      0.0000      0.0000  
 7553.7385      3993.9651      302.1873      -3559.7734      4054.7847  
 306.3504      107.3496      94.8225      656151.2420      -28.1451  
 -28.1161  
 [2361]ENERGY: 6490000      3271.0366      5136.9307      5260.0245  
 348.8577      -15869.3474      -1722.1853      0.0000      0.0000  
 7569.5737      3994.8905      302.8208      -3574.6832      4054.2349  
 306.1318      -163.2615      -145.2064      656151.2420      -22.9319  
 -22.9428  
 [2400]ENERGY: 6500000      3108.9276      5265.8485      5320.7853  
 351.6399      -15973.3608      -1726.0192      0.0000      0.0000  
 7646.4644      3994.2856      305.8968      -3652.1788      4055.0598  
 306.1177      -5.5560      -0.2178      656151.2420      -26.5299  
 -26.5394  
 [2450]ENERGY: 6510000      3260.3494      5267.4628      5234.4729  
 345.5304      -15928.1144      -1804.4219      0.0000      0.0000  
 7615.4671      3990.7463      304.6568      -3624.7208      4055.2600

## Supplementary Text 6

|                       |             |            |             |           |
|-----------------------|-------------|------------|-------------|-----------|
| 306.3399              | -207.2333   | -176.1836  | 656151.2420 | -21.6661  |
| -21.6446              |             |            |             |           |
| [2486]ENERGY: 6520000 | 3102.0756   | 5165.7285  | 5255.0902   |           |
| 325.4714              | -15813.7954 | -1794.7241 | 0.0000      | 0.0000    |
| 7751.7039             | 3991.5502   | 310.1069   | -3760.1537  | 4056.4429 |
| 306.1861              | 154.8730    | 56.5279    | 656151.2420 | -25.1750  |
| -25.1929              |             |            |             |           |
| [2536]ENERGY: 6530000 | 3168.0093   | 5231.9995  | 5283.3377   |           |
| 329.9716              | -15877.4775 | -1785.5841 | 0.0000      | 0.0000    |
| 7641.3567             | 3991.6133   | 305.6925   | -3649.7434  | 4055.6709 |
| 306.2404              | -54.4073    | -18.4011   | 656151.2420 | -28.0941  |
| -28.0823              |             |            |             |           |
| [2572]ENERGY: 6540000 | 3216.1216   | 5064.7821  | 5293.6080   |           |
| 353.2241              | -15833.5119 | -1692.8438 | 0.0000      | 0.0000    |
| 7596.5841             | 3997.9641   | 303.9013   | -3598.6200  | 4055.8241 |
| 306.1131              | 66.8225     | 33.5978    | 656151.2420 | -23.9371  |
| -23.9364              |             |            |             |           |
| [2622]ENERGY: 6550000 | 3138.2979   | 5292.1470  | 5276.2104   |           |
| 349.1878              | -15908.8798 | -1792.8737 | 0.0000      | 0.0000    |
| 7642.9007             | 3996.9903   | 305.7542   | -3645.9104  | 4056.9015 |
| 306.1905              | 23.4940     | -23.9943   | 656151.2420 | -29.1007  |
| -29.0967              |             |            |             |           |
| [2658]ENERGY: 6560000 | 3206.0452   | 5194.3708  | 5228.3586   |           |
| 334.5764              | -15776.1017 | -1774.1273 | 0.0000      | 0.0000    |
| 7582.9278             | 3996.0497   | 303.3550   | -3586.8780  | 4056.3300 |
| 305.9799              | -132.9182   | -80.4854   | 656151.2420 | -22.3589  |
| -22.3703              |             |            |             |           |
| [2708]ENERGY: 6570000 | 3133.5854   | 5102.5352  | 5331.5410   |           |
| 350.3501              | -15852.5191 | -1760.4566 | 0.0000      | 0.0000    |
| 7686.6778             | 3991.7138   | 307.5055   | -3694.9640  | 4055.8884 |
| 306.2253              | -130.3084   | -112.1351  | 656151.2420 | -26.5607  |
| -26.5483              |             |            |             |           |
| [2744]ENERGY: 6580000 | 3184.1004   | 5138.1036  | 5290.6267   |           |
| 359.8095              | -15909.8204 | -1683.5055 | 0.0000      | 0.0000    |
| 7615.1064             | 3994.4206   | 304.6423   | -3620.6858  | 4057.3416 |
| 306.3577              | -46.6984    | -47.5029   | 656151.2420 | -22.6698  |
| -22.6750              |             |            |             |           |
| [2794]ENERGY: 6590000 | 3158.9965   | 5195.4685  | 5282.2648   |           |
| 352.2456              | -15905.2969 | -1801.0956 | 0.0000      | 0.0000    |
| 7713.1207             | 3995.7038   | 308.5634   | -3717.4169  | 4058.0152 |
| 306.2321              | -42.4536    | -91.6578   | 656151.2420 | -30.5911  |
| -30.5867              |             |            |             |           |
| [2833]ENERGY: 6600000 | 3173.0310   | 5279.1752  | 5305.2101   |           |
| 324.5590              | -15908.5419 | -1828.2179 | 0.0000      | 0.0000    |
| 7647.5963             | 3992.8117   | 305.9421   | -3654.7845  | 4057.5144 |
| 306.2616              | 41.8109     | -21.7702   | 656151.2420 | -23.7781  |
| -23.7748              |             |            |             |           |
| [2883]ENERGY: 6610000 | 3255.3318   | 5208.1674  | 5233.8461   |           |
| 350.4866              | -15878.4342 | -1816.7220 | 0.0000      | 0.0000    |
| 7646.0558             | 3998.7314   | 305.8805   | -3647.3243  | 4058.1670 |
| 306.3071              | 62.6523     | -35.1123   | 656151.2420 | -26.4114  |
| -26.4108              |             |            |             |           |
| [2919]ENERGY: 6620000 | 3116.3536   | 5264.7927  | 5245.0343   |           |
| 333.9982              | -15884.7749 | -1762.1673 | 0.0000      | 0.0000    |

## Supplementary Text 6

|                       |             |            |             |           |
|-----------------------|-------------|------------|-------------|-----------|
| 7683.6591             | 3996.8958   | 307.3848   | -3686.7633  | 4057.9968 |
| 306.4739              | 58.7970     | -35.7289   | 656151.2420 | -25.7714  |
| -25.7904              |             |            |             |           |
| [2969]ENERGY: 6630000 | 3155.1062   | 5207.6544  | 5214.3442   |           |
| 331.4261              | -15843.3088 | -1724.9014 | 0.0000      | 0.0000    |
| 7653.5428             | 3993.8634   | 306.1800   | -3659.6794  | 4057.5859 |
| 306.4849              | 34.6609     | 0.3403     | 656151.2420 | -24.1627  |
| -24.1515              |             |            |             |           |
| [3005]ENERGY: 6640000 | 3140.9980   | 5230.5243  | 5239.8780   |           |
| 338.6586              | -15864.2169 | -1782.7362 | 0.0000      | 0.0000    |
| 7693.0290             | 3996.1348   | 307.7596   | -3696.8942  | 4059.0738 |
| 306.5273              | 200.9693    | 74.2250    | 656151.2420 | -26.8499  |
| -26.8727              |             |            |             |           |
| [3055]ENERGY: 6650000 | 3124.4097   | 5210.7128  | 5242.6966   |           |
| 344.0518              | -15940.0244 | -1726.1589 | 0.0000      | 0.0000    |
| 7739.4797             | 3995.1674   | 309.6179   | -3744.3123  | 4059.4439 |
| 306.2782              | 43.6971     | 20.5147    | 656151.2420 | -26.1280  |
| -26.1056              |             |            |             |           |
| [3091]ENERGY: 6660000 | 3125.8083   | 5357.4302  | 5267.2532   |           |
| 339.5903              | -15907.7781 | -1815.4976 | 0.0000      | 0.0000    |
| 7631.0424             | 3997.8487   | 305.2798   | -3633.1937  | 4059.6481 |
| 306.4791              | -39.1863    | -10.3090   | 656151.2420 | -27.1560  |
| -27.1504              |             |            |             |           |
| [3141]ENERGY: 6670000 | 3193.6261   | 5269.8627  | 5250.5148   |           |
| 320.0079              | -15855.1316 | -1741.8497 | 0.0000      | 0.0000    |
| 7563.3317             | 4000.3619   | 302.5711   | -3562.9699  | 4059.3634 |
| 306.2819              | -107.3123   | -90.6075   | 656151.2420 | -26.2838  |
| -26.2977              |             |            |             |           |
| [3177]ENERGY: 6680000 | 3234.9385   | 5075.8909  | 5288.8407   |           |
| 328.2939              | -15851.4478 | -1727.0607 | 0.0000      | 0.0000    |
| 7652.8557             | 4002.3112   | 306.1525   | -3650.5446  | 4060.9579 |
| 306.2227              | 66.5913     | -15.9191   | 656151.2420 | -27.8298  |
| -27.8213              |             |            |             |           |
| [3227]ENERGY: 6690000 | 3227.3420   | 5162.0624  | 5282.3402   |           |
| 353.1192              | -15871.4771 | -1784.8078 | 0.0000      | 0.0000    |
| 7630.7111             | 3999.2902   | 305.2666   | -3631.4210  | 4059.3389 |
| 306.2746              | 4.2143      | -29.5216   | 656151.2420 | -25.7837  |
| -25.7935              |             |            |             |           |
| [3266]ENERGY: 6700000 | 3178.2795   | 5183.5919  | 5271.4122   |           |
| 333.7118              | -15964.1803 | -1743.1359 | 0.0000      | 0.0000    |
| 7733.1748             | 3992.8540   | 309.3657   | -3740.3207  | 4059.4534 |
| 306.3414              | -70.8513    | -64.4453   | 656151.2420 | -25.8039  |
| -25.8003              |             |            |             |           |
| [3316]ENERGY: 6710000 | 3228.2368   | 5068.4529  | 5315.7064   |           |
| 324.6827              | -15835.3156 | -1794.4279 | 0.0000      | 0.0000    |
| 7691.2531             | 3998.5883   | 307.6886   | -3692.6648  | 4060.6432 |
| 306.3161              | -11.1250    | -42.2566   | 656151.2420 | -27.2849  |
| -27.2664              |             |            |             |           |
| [3352]ENERGY: 6720000 | 3145.4592   | 5167.9102  | 5229.2925   |           |
| 345.7862              | -15824.0879 | -1744.7087 | 0.0000      | 0.0000    |
| 7678.3064             | 3997.9579   | 307.1706   | -3680.3484  | 4060.5079 |
| 306.3438              | 26.6384     | 8.5615     | 656151.2420 | -27.9603  |
| -27.9834              |             |            |             |           |
| [3402]ENERGY: 6730000 | 3115.9487   | 5100.0754  | 5287.0153   |           |

## Supplementary Text 6

|                       |             |            |             |           |
|-----------------------|-------------|------------|-------------|-----------|
| 348.0599              | -15736.8587 | -1780.5121 | 0.0000      | 0.0000    |
| 7666.4511             | 4000.1797   | 306.6964   | -3666.2714  | 4061.0301 |
| 306.2870              | 84.6462     | 44.2096    | 656151.2420 | -28.2225  |
| -28.2213              |             |            |             |           |
| [3438]ENERGY: 6740000 | 3180.1050   | 5233.6141  | 5258.7161   |           |
| 352.6306              | -15899.9097 | -1746.4993 | 0.0000      | 0.0000    |
| 7618.8758             | 3997.5326   | 304.7931   | -3621.3433  | 4059.9790 |
| 306.3140              | 150.1047    | 59.7711    | 656151.2420 | -27.8891  |
| -27.8750              |             |            |             |           |
| [3488]ENERGY: 6750000 | 3180.1940   | 5212.1605  | 5261.2311   |           |
| 347.7025              | -15914.9070 | -1742.9490 | 0.0000      | 0.0000    |
| 7656.1649             | 3999.5969   | 306.2849   | -3656.5679  | 4060.0178 |
| 306.3170              | 77.4824     | 16.8462    | 656151.2420 | -28.8930  |
| -28.8820              |             |            |             |           |
| [3524]ENERGY: 6760000 | 3218.6597   | 5218.8009  | 5292.7866   |           |
| 364.6608              | -15913.0873 | -1732.1387 | 0.0000      | 0.0000    |
| 7553.4623             | 4003.1444   | 302.1763   | -3550.3179  | 4061.0940 |
| 306.3055              | 180.8514    | 159.2945   | 656151.2420 | -21.5212  |
| -21.5281              |             |            |             |           |
| [3574]ENERGY: 6770000 | 3214.4385   | 5172.7207  | 5271.0463   |           |
| 349.4796              | -15929.3923 | -1731.1345 | 0.0000      | 0.0000    |
| 7653.5635             | 4000.7218   | 306.1808   | -3652.8417  | 4061.4151 |
| 306.3538              | -1.8292     | -51.4551   | 656151.2420 | -27.1691  |
| -27.1962              |             |            |             |           |
| [3610]ENERGY: 6780000 | 3184.8045   | 5173.9594  | 5222.8692   |           |
| 341.8707              | -15869.3540 | -1746.5766 | 0.0000      | 0.0000    |
| 7689.0694             | 3996.6425   | 307.6012   | -3692.4269  | 4060.2067 |
| 306.2262              | 177.9665    | 154.4153   | 656151.2420 | -26.7960  |
| -26.7770              |             |            |             |           |
| [3660]ENERGY: 6790000 | 3162.1603   | 5139.7499  | 5248.8269   |           |
| 352.9385              | -15817.6052 | -1692.7575 | 0.0000      | 0.0000    |
| 7609.4088             | 4002.7219   | 304.4144   | -3606.6869  | 4060.9652 |
| 306.4265              | 208.0386    | 202.6216   | 656151.2420 | -20.0736  |
| -20.0629              |             |            |             |           |
| [3699]ENERGY: 6800000 | 3171.4369   | 5148.5810  | 5295.0200   |           |
| 355.9102              | -15787.2436 | -1827.7052 | 0.0000      | 0.0000    |
| 7642.9440             | 3998.9432   | 305.7560   | -3644.0007  | 4062.2786 |
| 306.1008              | -64.7615    | -93.7680   | 656151.2420 | -28.5923  |
| -28.6099              |             |            |             |           |
| [3749]ENERGY: 6810000 | 3172.1413   | 5176.4282  | 5290.8808   |           |
| 340.8087              | -15849.4237 | -1800.5051 | 0.0000      | 0.0000    |
| 7668.7197             | 3999.0498   | 306.7871   | -3669.6698  | 4060.9276 |
| 306.1869              | -31.2777    | -61.9453   | 656151.2420 | -24.5413  |
| -24.5408              |             |            |             |           |
| [3785]ENERGY: 6820000 | 3251.3392   | 5153.2665  | 5289.9237   |           |
| 337.6852              | -15861.5337 | -1778.1854 | 0.0000      | 0.0000    |
| 7611.9083             | 4004.4037   | 304.5144   | -3607.5046  | 4061.5012 |
| 306.1670              | -156.4921   | -137.7107  | 656151.2420 | -27.3644  |
| -27.3519              |             |            |             |           |
| [3835]ENERGY: 6830000 | 3204.4079   | 5192.5777  | 5259.6202   |           |
| 329.2347              | -15860.0328 | -1779.1361 | 0.0000      | 0.0000    |
| 7654.0626             | 4000.7342   | 306.2008   | -3653.3285  | 4060.6380 |
| 306.1092              | -92.8333    | -92.2594   | 656151.2420 | -27.5821  |
| -27.5858              |             |            |             |           |



## Supplementary Text 6

|                       |             |            |             |           |
|-----------------------|-------------|------------|-------------|-----------|
| [3871]ENERGY: 6840000 | 3230.6505   | 5233.1736  | 5274.6128   |           |
| 341.5954              | -15970.8975 | -1773.0410 | 0.0000      | 0.0000    |
| 7666.5886             | 4002.6823   | 306.7019   | -3663.9063  | 4062.2352 |
| 306.1331              | -117.8487   | -63.8831   | 656151.2420 | -32.2526  |
| -32.2512              |             |            |             |           |
| [3921]ENERGY: 6850000 | 3214.8313   | 5128.9613  | 5275.2681   |           |
| 335.4722              | -15884.3290 | -1729.7180 | 0.0000      | 0.0000    |
| 7661.3386             | 4001.8244   | 306.4918   | -3659.5142  | 4062.1990 |
| 306.1935              | 187.0260    | 182.5270   | 656151.2420 | -25.6734  |
| -25.6722              |             |            |             |           |
| [3957]ENERGY: 6860000 | 3143.7470   | 5072.7021  | 5285.4470   |           |
| 333.2454              | -15839.1581 | -1727.4481 | 0.0000      | 0.0000    |
| 7733.4063             | 4001.9416   | 309.3749   | -3731.4646  | 4063.1574 |
| 306.1367              | 123.0777    | -6.9699    | 656151.2420 | -25.9780  |
| -25.9924              |             |            |             |           |
| [4007]ENERGY: 6870000 | 3141.7827   | 5253.4401  | 5241.9648   |           |
| 363.2591              | -15861.3725 | -1764.1412 | 0.0000      | 0.0000    |
| 7628.3874             | 4003.3203   | 305.1736   | -3625.0671  | 4063.0124 |
| 306.1408              | -136.0076   | -115.4713  | 656151.2420 | -29.0942  |
| -29.0859              |             |            |             |           |
| [4043]ENERGY: 6880000 | 3127.6633   | 5190.5795  | 5278.4786   |           |
| 314.8226              | -15827.2883 | -1777.1296 | 0.0000      | 0.0000    |
| 7690.6795             | 3997.8056   | 307.6656   | -3692.8739  | 4061.6395 |
| 306.3228              | 62.5344     | 1.9791     | 656151.2420 | -21.6916  |
| -21.7042              |             |            |             |           |
| [4093]ENERGY: 6890000 | 3183.7196   | 5217.0867  | 5269.4795   |           |
| 351.7749              | -15794.4121 | -1843.5542 | 0.0000      | 0.0000    |
| 7615.8764             | 3999.9708   | 304.6731   | -3615.9056  | 4061.9708 |
| 306.4035              | -61.9271    | -88.5634   | 656151.2420 | -30.5456  |
| -30.5286              |             |            |             |           |
| [4132]ENERGY: 6900000 | 3156.8519   | 5156.8379  | 5228.6180   |           |
| 341.0406              | -15862.4674 | -1728.3539 | 0.0000      | 0.0000    |
| 7705.9221             | 3998.4492   | 308.2754   | -3707.4728  | 4061.4914 |
| 306.5208              | 3.3602      | -64.3980   | 656151.2420 | -22.3301  |
| -22.3408              |             |            |             |           |
| [4182]ENERGY: 6910000 | 3147.9392   | 5187.5569  | 5275.1154   |           |
| 331.5556              | -15895.9816 | -1746.0234 | 0.0000      | 0.0000    |
| 7696.1679             | 3996.3300   | 307.8852   | -3699.8379  | 4060.4014 |
| 306.4639              | 36.2814     | 35.6980    | 656151.2420 | -28.8263  |
| -28.8200              |             |            |             |           |
| [4218]ENERGY: 6920000 | 3115.6605   | 5211.4137  | 5259.7646   |           |
| 347.2841              | -15871.3847 | -1729.7123 | 0.0000      | 0.0000    |
| 7667.0762             | 4000.1021   | 306.7214   | -3666.9740  | 4061.5517 |
| 306.2633              | -39.5999    | -53.3137   | 656151.2420 | -25.8487  |
| -25.8613              |             |            |             |           |
| [4268]ENERGY: 6930000 | 3113.9088   | 5251.6103  | 5257.6162   |           |
| 314.3978              | -15918.8092 | -1727.8567 | 0.0000      | 0.0000    |
| 7706.8452             | 3997.7124   | 308.3123   | -3709.1327  | 4061.6516 |
| 306.1329              | 232.3353    | 201.0583   | 656151.2420 | -24.5769  |
| -24.5676              |             |            |             |           |
| [4304]ENERGY: 6940000 | 3146.4162   | 5146.6997  | 5239.2084   |           |
| 326.6937              | -15841.6707 | -1697.3874 | 0.0000      | 0.0000    |
| 7681.7917             | 4001.7515   | 307.3101   | -3680.0402  | 4061.1831 |
| 306.1678              | 54.6326     | 49.2008    | 656151.2420 | -21.1551  |

Supplementary Text 6

-21.1504  
 [4354]ENERGY: 6950000      3148.8865      5231.4683      5270.9496  
 366.9261      -15939.7518      -1742.7439      0.0000      0.0000  
 7661.6860      3997.4209      306.5057      -3664.2652      4061.1540  
 306.1438      244.1208      129.4781      656151.2420      -26.7890  
 -26.7997  
 [4390]ENERGY: 6960000      3164.6845      5161.8153      5264.3754  
 332.9828      -15814.2889      -1794.4583      0.0000      0.0000  
 7682.3690      3997.4798      307.3332      -3684.8892      4062.4607  
 306.0391      2.7265      -88.8408      656151.2420      -23.9948  
 -23.9755  
 [4440]ENERGY: 6970000      3186.0924      5154.2300      5278.3793  
 339.6159      -15859.4343      -1763.6346      0.0000      0.0000  
 7664.8250      4000.0737      306.6313      -3664.7513      4061.5627  
 306.0989      33.3511      -89.2328      656151.2420      -24.3788  
 -24.4033  
 [4476]ENERGY: 6980000      3184.4807      5143.1003      5273.5894  
 361.3828      -15872.8296      -1801.5178      0.0000      0.0000  
 7710.3186      3998.5243      308.4513      -3711.7943      4061.3419  
 306.0395      -23.9586      -16.5248      656151.2420      -24.9584  
 -24.9356  
 [4526]ENERGY: 6990000      3168.0620      5208.1574      5314.4379  
 332.8155      -15880.4690      -1761.3430      0.0000      0.0000  
 7620.8702      4002.5310      304.8729      -3618.3392      4062.9655  
 305.9841      99.0275      67.6152      656151.2420      -24.4807  
 -24.4706  
 [4565]ENERGY: 7000000      3164.3408      5253.9544      5259.6636  
 360.7595      -15936.2589      -1716.1438      0.0000      0.0000  
 7613.5583      3999.8739      304.5804      -3613.6843      4060.7814  
 306.2982      99.4131      135.1755      656151.2420      -22.9019  
 -22.9131  
 [4615]ENERGY: 7010000      3215.1978      5110.8371      5301.2671  
 323.7426      -15753.0999      -1847.3732      0.0000      0.0000  
 7651.5976      4002.1692      306.1022      -3649.4285      4062.6382  
 306.1892      -111.1487      -52.4644      656151.2420      -25.9838  
 -25.9867  
 [4651]ENERGY: 7020000      3227.1019      5177.7211      5285.5040  
 338.9686      -15850.6481      -1799.9630      0.0000      0.0000  
 7622.7231      4001.4075      304.9470      -3621.3156      4061.5764  
 306.3509      -54.4227      -104.8705      656151.2420      -24.6118  
 -24.6128  
 [4701]ENERGY: 7030000      3214.7515      5158.5663      5243.8280  
 340.9208      -15852.2528      -1761.3043      0.0000      0.0000  
 7656.6095      4001.1190      306.3027      -3655.4905      4063.7736  
 306.4072      115.5590      29.9974      656151.2420      -26.1382  
 -26.1427  
 [4737]ENERGY: 7040000      3138.0222      5139.5455      5227.9873  
 340.0121      -15797.1945      -1751.0572      0.0000      0.0000  
 7701.6516      3998.9670      308.1046      -3702.6846      4063.5508  
 306.3458      53.4649      91.6729      656151.2420      -25.8113  
 -25.8134  
 [4787]ENERGY: 7050000      3134.0945      5219.0461      5268.3030  
 323.3569      -15768.5634      -1792.5280      0.0000      0.0000  
 7615.7780      3999.4870      304.6692      -3616.2909      4062.9252

Supplementary Text 6

|                       |             |            |             |           |
|-----------------------|-------------|------------|-------------|-----------|
| 306.4424              | 22.0492     | 14.8604    | 656151.2420 | -22.6249  |
| -22.6121              |             |            |             |           |
| [4823]ENERGY: 7060000 | 3147.1268   | 5231.8612  | 5254.8255   |           |
| 339.9611              | -15868.3639 | -1793.3873 | 0.0000      | 0.0000    |
| 7687.1703             | 3999.1938   | 307.5252   | -3687.9765  | 4063.5060 |
| 306.2789              | -39.8979    | -125.7711  | 656151.2420 | -29.5718  |
| -29.5952              |             |            |             |           |
| [4873]ENERGY: 7070000 | 3159.2020   | 5150.0298  | 5317.4636   |           |
| 345.4222              | -15916.6520 | -1781.2834 | 0.0000      | 0.0000    |
| 7725.1062             | 3999.2885   | 309.0429   | -3725.8177  | 4064.0577 |
| 306.2234              | -48.7725    | -42.3239   | 656151.2420 | -24.5202  |
| -24.5060              |             |            |             |           |
| [4909]ENERGY: 7080000 | 3205.9116   | 5173.9252  | 5283.6499   |           |
| 353.5400              | -15910.1559 | -1694.4649 | 0.0000      | 0.0000    |
| 7594.0460             | 4006.4520   | 303.7998   | -3587.5940  | 4065.1054 |
| 306.1780              | 25.3392     | 41.4147    | 656151.2420 | -28.5948  |
| -28.5857              |             |            |             |           |
| [4959]ENERGY: 7090000 | 3180.6203   | 5151.8119  | 5215.8079   |           |
| 346.1917              | -15820.5917 | -1762.1552 | 0.0000      | 0.0000    |
| 7693.1035             | 4004.7884   | 307.7626   | -3688.3150  | 4064.9853 |
| 306.1867              | 76.4991     | 50.0723    | 656151.2420 | -26.4497  |
| -26.4507              |             |            |             |           |
| [4998]ENERGY: 7100000 | 3157.8793   | 5201.3848  | 5273.4863   |           |
| 347.7276              | -15844.3314 | -1746.5270 | 0.0000      | 0.0000    |
| 7617.7243             | 4007.3439   | 304.7471   | -3610.3804  | 4065.7718 |
| 306.3043              | 92.8829     | 86.9213    | 656151.2420 | -25.5200  |
| -25.5507              |             |            |             |           |
| [5048]ENERGY: 7110000 | 3241.6314   | 5230.2724  | 5295.7408   |           |
| 336.5968              | -15953.9694 | -1762.6083 | 0.0000      | 0.0000    |
| 7615.5830             | 4003.2467   | 304.6614   | -3612.3363  | 4065.5139 |
| 306.5811              | -104.8366   | -95.6177   | 656151.2420 | -23.4684  |
| -23.4708              |             |            |             |           |
| [5084]ENERGY: 7120000 | 3201.4911   | 5162.3030  | 5263.1392   |           |
| 345.0711              | -15913.4620 | -1692.4419 | 0.0000      | 0.0000    |
| 7637.2667             | 4003.3672   | 305.5289   | -3633.8994  | 4064.5498 |
| 306.5812              | 165.5060    | 138.6878   | 656151.2420 | -24.0587  |
| -24.0278              |             |            |             |           |
| [5134]ENERGY: 7130000 | 3182.8076   | 5137.7379  | 5297.5037   |           |
| 335.3880              | -15931.7979 | -1751.5940 | 0.0000      | 0.0000    |
| 7729.0017             | 3999.0470   | 309.1987   | -3729.9547  | 4064.6040 |
| 306.5659              | -29.4380    | -37.7728   | 656151.2420 | -19.1831  |
| -19.1949              |             |            |             |           |
| [5170]ENERGY: 7140000 | 3144.1627   | 5241.2216  | 5249.1236   |           |
| 323.5467              | -15855.3223 | -1736.1521 | 0.0000      | 0.0000    |
| 7634.6040             | 4001.1843   | 305.4223   | -3633.4197  | 4064.8253 |
| 306.3976              | 72.6503     | 78.0994    | 656151.2420 | -25.0501  |
| -25.0430              |             |            |             |           |
| [5220]ENERGY: 7150000 | 3167.0342   | 5192.7929  | 5238.2779   |           |
| 337.4537              | -15836.8050 | -1794.0915 | 0.0000      | 0.0000    |
| 7697.1903             | 4001.8524   | 307.9261   | -3695.3379  | 4063.7514 |
| 306.2958              | 4.8855      | 58.5069    | 656151.2420 | -22.0590  |
| -22.0560              |             |            |             |           |
| [5256]ENERGY: 7160000 | 3199.1181   | 5114.9436  | 5272.2218   |           |
| 323.7701              | -15784.8790 | -1731.6672 | 0.0000      | 0.0000    |

Supplementary Text 6

|                       |             |            |             |           |
|-----------------------|-------------|------------|-------------|-----------|
| 7615.4227             | 4008.9301   | 304.6550   | -3606.4926  | 4065.6828 |
| 306.2798              | 186.8884    | 48.1022    | 656151.2420 | -24.0793  |
| -24.1126              |             |            |             |           |
| [5306]ENERGY: 7170000 | 3218.6987   | 5224.4660  | 5287.8040   |           |
| 343.3173              | -15919.1081 | -1815.0841 | 0.0000      | 0.0000    |
| 7665.3209             | 4005.4147   | 306.6512   | -3659.9062  | 4065.2001 |
| 306.1129              | -97.1262    | -110.5901  | 656151.2420 | -24.9306  |
| -24.9027              |             |            |             |           |
| [5342]ENERGY: 7180000 | 3181.9337   | 5139.3294  | 5254.0958   |           |
| 322.1243              | -15873.7996 | -1694.3040 | 0.0000      | 0.0000    |
| 7675.3192             | 4004.6987   | 307.0511   | -3670.6204  | 4065.3129 |
| 306.3378              | 158.5189    | 131.4743   | 656151.2420 | -25.4963  |
| -25.4872              |             |            |             |           |
| [5392]ENERGY: 7190000 | 3186.6711   | 5222.3538  | 5299.2751   |           |
| 363.2695              | -15844.6661 | -1782.6975 | 0.0000      | 0.0000    |
| 7560.7100             | 4004.9159   | 302.4662   | -3555.7941  | 4065.3762 |
| 306.3424              | -67.4726    | -79.5915   | 656151.2420 | -26.1967  |
| -26.2040              |             |            |             |           |
| [5431]ENERGY: 7200000 | 3151.9926   | 5275.0035  | 5243.8974   |           |
| 334.6415              | -15808.5390 | -1835.2424 | 0.0000      | 0.0000    |
| 7642.3666             | 4004.1201   | 305.7329   | -3638.2465  | 4066.9906 |
| 306.5837              | 126.3620    | 71.9598    | 656151.2420 | -22.8372  |
| -22.8433              |             |            |             |           |
| [5481]ENERGY: 7210000 | 3136.3908   | 5162.7863  | 5293.2469   |           |
| 325.9126              | -15779.8820 | -1793.1928 | 0.0000      | 0.0000    |
| 7658.8023             | 4004.0640   | 306.3904   | -3654.7382  | 4067.0708 |
| 306.5273              | -65.4004    | -98.4617   | 656151.2420 | -27.0821  |
| -27.0749              |             |            |             |           |
| [5517]ENERGY: 7220000 | 3185.4974   | 5188.6319  | 5268.9204   |           |
| 330.3868              | -15850.3645 | -1764.8547 | 0.0000      | 0.0000    |
| 7646.9292             | 4005.1465   | 305.9154   | -3641.7827  | 4066.8521 |
| 306.5364              | -48.3063    | 5.9447     | 656151.2420 | -18.4215  |
| -18.4282              |             |            |             |           |
| [5567]ENERGY: 7230000 | 3115.9882   | 5281.0578  | 5298.9705   |           |
| 337.5740              | -15877.9638 | -1800.3655 | 0.0000      | 0.0000    |
| 7652.1671             | 4007.4283   | 306.1249   | -3644.7388  | 4068.4883 |
| 306.5736              | -112.3183   | -65.3707   | 656151.2420 | -23.8737  |
| -23.8801              |             |            |             |           |
| [5603]ENERGY: 7240000 | 3196.6605   | 5200.2852  | 5242.1640   |           |
| 336.0987              | -15846.0886 | -1815.8943 | 0.0000      | 0.0000    |
| 7691.5004             | 4004.7259   | 307.6985   | -3686.7745  | 4069.6554 |
| 306.5015              | -65.6130    | -46.4566   | 656151.2420 | -21.1406  |
| -21.1233              |             |            |             |           |
| [5653]ENERGY: 7250000 | 3175.4445   | 5157.4038  | 5297.1360   |           |
| 357.6388              | -15843.9883 | -1735.3687 | 0.0000      | 0.0000    |
| 7602.6034             | 4010.8695   | 304.1421   | -3591.7339  | 4069.2773 |
| 306.4055              | -22.6332    | -48.6308   | 656151.2420 | -24.0041  |
| -24.0223              |             |            |             |           |
| [5689]ENERGY: 7260000 | 3169.8318   | 5249.4956  | 5325.6774   |           |
| 344.3721              | -15974.9308 | -1747.2224 | 0.0000      | 0.0000    |
| 7639.0140             | 4006.2377   | 305.5988   | -3632.7763  | 4068.6564 |
| 306.4457              | -79.2454    | -85.5006   | 656151.2420 | -21.9661  |
| -21.9635              |             |            |             |           |
| [5739]ENERGY: 7270000 | 3136.0349   | 5220.9412  | 5275.6061   |           |

## Supplementary Text 6

|                       |             |            |             |           |
|-----------------------|-------------|------------|-------------|-----------|
| 356.4420              | -15750.9614 | -1883.7335 | 0.0000      | 0.0000    |
| 7652.8392             | 4007.1687   | 306.1518   | -3645.6706  | 4069.9579 |
| 306.4617              | -59.8385    | -63.6277   | 656151.2420 | -17.5299  |
| -17.5030              |             |            |             |           |
| [5775]ENERGY: 7280000 | 3211.4889   | 5202.8562  | 5288.6482   |           |
| 338.8907              | -15863.7019 | -1794.8210 | 0.0000      | 0.0000    |
| 7623.4293             | 4006.7905   | 304.9753   | -3616.6388  | 4070.3049 |
| 306.3871              | -39.7643    | -95.4896   | 656151.2420 | -26.3572  |
| -26.3768              |             |            |             |           |
| [5825]ENERGY: 7290000 | 3164.2777   | 5119.7361  | 5329.0554   |           |
| 365.6777              | -15914.1920 | -1701.4506 | 0.0000      | 0.0000    |
| 7645.1969             | 4008.3012   | 305.8461   | -3636.8957  | 4070.3840 |
| 306.5547              | 126.8398    | 97.4919    | 656151.2420 | -22.9313  |
| -22.9158              |             |            |             |           |
| [5864]ENERGY: 7300000 | 3190.2982   | 5164.9755  | 5273.9333   |           |
| 320.6540              | -15834.4093 | -1818.1006 | 0.0000      | 0.0000    |
| 7709.8939             | 4007.2450   | 308.4343   | -3702.6489  | 4071.5532 |
| 306.7324              | -118.3534   | -134.4439  | 656151.2420 | -23.5168  |
| -23.5445              |             |            |             |           |
| [5914]ENERGY: 7310000 | 3180.5688   | 5185.4183  | 5281.8884   |           |
| 343.9073              | -15861.1380 | -1709.5095 | 0.0000      | 0.0000    |
| 7590.8500             | 4011.9853   | 303.6720   | -3578.8647  | 4071.2551 |
| 306.7481              | 165.6433    | 99.2220    | 656151.2420 | -25.6363  |
| -25.6172              |             |            |             |           |
| [5950]ENERGY: 7320000 | 3165.4933   | 5116.6743  | 5263.6176   |           |
| 338.4083              | -15817.6036 | -1703.4052 | 0.0000      | 0.0000    |
| 7646.7845             | 4009.9692   | 305.9096   | -3636.8153  | 4070.4112 |
| 306.6269              | 39.1240     | 101.0316   | 656151.2420 | -26.3618  |
| -26.3645              |             |            |             |           |
| [6000]ENERGY: 7330000 | 3075.4712   | 5160.8463  | 5273.7818   |           |
| 332.0089              | -15814.6865 | -1810.8404 | 0.0000      | 0.0000    |
| 7791.0551             | 4007.6363   | 311.6812   | -3783.4187  | 4071.4189 |
| 306.5975              | 50.6126     | -0.4734    | 656151.2420 | -27.9536  |
| -27.9504              |             |            |             |           |
| [6036]ENERGY: 7340000 | 3097.8630   | 5197.4520  | 5309.8420   |           |
| 337.4777              | -15819.3294 | -1776.3560 | 0.0000      | 0.0000    |
| 7663.2381             | 4010.1874   | 306.5678   | -3653.0507  | 4072.4672 |
| 306.4735              | 82.1888     | -49.1743   | 656151.2420 | -25.0418  |
| -25.0534              |             |            |             |           |
| [6086]ENERGY: 7350000 | 3229.0075   | 5135.0608  | 5309.9045   |           |
| 353.9833              | -15820.0589 | -1803.7933 | 0.0000      | 0.0000    |
| 7603.1632             | 4007.2671   | 304.1645   | -3595.8961  | 4070.7500 |
| 306.3424              | -183.7880   | -119.7988  | 656151.2420 | -25.8207  |
| -25.8196              |             |            |             |           |
| [6122]ENERGY: 7360000 | 3208.0245   | 5216.7210  | 5283.7567   |           |
| 335.0269              | -15843.8475 | -1779.5161 | 0.0000      | 0.0000    |
| 7592.2254             | 4012.3910   | 303.7270   | -3579.8344  | 4071.9449 |
| 306.3262              | -38.7065    | 0.3139     | 656151.2420 | -26.2168  |
| -26.2080              |             |            |             |           |
| [6172]ENERGY: 7370000 | 3190.4824   | 5138.7245  | 5259.6540   |           |
| 330.0484              | -15862.3306 | -1746.7595 | 0.0000      | 0.0000    |
| 7699.7140             | 4009.5333   | 308.0271   | -3690.1807  | 4070.3780 |
| 306.1980              | 160.1402    | 136.9431   | 656151.2420 | -24.0125  |
| -24.0161              |             |            |             |           |

## Supplementary Text 6

|                       |             |            |             |           |
|-----------------------|-------------|------------|-------------|-----------|
| [6208]ENERGY: 7380000 | 3164.9235   | 5190.4774  | 5293.7011   |           |
| 344.8957              | -15863.9747 | -1751.2269 | 0.0000      | 0.0000    |
| 7632.5441             | 4011.3401   | 305.3399   | -3621.2039  | 4071.9667 |
| 306.2708              | 83.3843     | -31.2844   | 656151.2420 | -18.0917  |
| -18.0989              |             |            |             |           |
| [6258]ENERGY: 7390000 | 3255.3255   | 5164.5911  | 5283.1668   |           |
| 333.6812              | -15859.0604 | -1786.8653 | 0.0000      | 0.0000    |
| 7619.0379             | 4009.8769   | 304.7996   | -3609.1610  | 4071.6108 |
| 306.4613              | -73.0886    | -4.2150    | 656151.2420 | -24.7138  |
| -24.7090              |             |            |             |           |
| [6297]ENERGY: 7400000 | 3222.2558   | 5231.1983  | 5266.5071   |           |
| 326.8049              | -15904.6396 | -1728.8681 | 0.0000      | 0.0000    |
| 7597.5860             | 4010.8445   | 303.9414   | -3586.7416  | 4071.4351 |
| 306.4623              | -23.2941    | 0.2500     | 656151.2420 | -25.0844  |
| -25.0670              |             |            |             |           |
| [6347]ENERGY: 7410000 | 3180.6469   | 5076.3105  | 5267.7734   |           |
| 334.0576              | -15815.5614 | -1733.6079 | 0.0000      | 0.0000    |
| 7697.1803             | 4006.7993   | 307.9257   | -3690.3810  | 4071.8112 |
| 306.3442              | -206.4323   | -160.3455  | 656151.2420 | -28.7795  |
| -28.7834              |             |            |             |           |
| [6383]ENERGY: 7420000 | 3167.2228   | 5229.2085  | 5235.3021   |           |
| 339.0513              | -15788.4323 | -1787.7932 | 0.0000      | 0.0000    |
| 7618.5927             | 4013.1519   | 304.7818   | -3605.4407  | 4072.2096 |
| 306.5668              | -12.9390    | -0.2511    | 656151.2420 | -25.3717  |
| -25.3940              |             |            |             |           |
| [6433]ENERGY: 7430000 | 3182.2874   | 5174.8951  | 5252.6870   |           |
| 328.6492              | -15825.3683 | -1783.9645 | 0.0000      | 0.0000    |
| 7679.5537             | 4008.7396   | 307.2205   | -3670.8140  | 4072.2643 |
| 306.6062              | -86.0164    | -35.5971   | 656151.2420 | -27.1555  |
| -27.1373              |             |            |             |           |
| [6469]ENERGY: 7440000 | 3178.2179   | 5180.4400  | 5303.6582   |           |
| 343.3676              | -15816.9027 | -1800.2151 | 0.0000      | 0.0000    |
| 7624.2268             | 4012.7926   | 305.0072   | -3611.4342  | 4072.8476 |
| 306.4886              | 114.6935    | 70.2488    | 656151.2420 | -23.4710  |
| -23.4788              |             |            |             |           |
| [6519]ENERGY: 7450000 | 3172.4134   | 5233.8088  | 5313.4520   |           |
| 368.0485              | -15875.0327 | -1777.1791 | 0.0000      | 0.0000    |
| 7574.1998             | 4009.7107   | 303.0059   | -3564.4891  | 4073.1495 |
| 306.5239              | 77.1141     | -44.6784   | 656151.2420 | -23.1201  |
| -23.1105              |             |            |             |           |
| [6555]ENERGY: 7460000 | 3098.0510   | 5128.3234  | 5269.2016   |           |
| 326.9043              | -15756.5438 | -1755.3784 | 0.0000      | 0.0000    |
| 7698.2019             | 4008.7599   | 307.9666   | -3689.4420  | 4072.7546 |
| 306.4794              | 84.8765     | 69.9497    | 656151.2420 | -26.9675  |
| -26.9727              |             |            |             |           |
| [6605]ENERGY: 7470000 | 3151.2466   | 5211.4194  | 5271.3289   |           |
| 299.9117              | -15735.5439 | -1797.6144 | 0.0000      | 0.0000    |
| 7611.0755             | 4011.8237   | 304.4811   | -3599.2518  | 4074.3100 |
| 306.5220              | -63.2540    | -69.7909   | 656151.2420 | -22.1909  |
| -22.1897              |             |            |             |           |
| [6641]ENERGY: 7480000 | 3065.8306   | 5147.0225  | 5293.2894   |           |
| 323.2151              | -15890.8719 | -1666.6632 | 0.0000      | 0.0000    |
| 7739.4345             | 4011.2569   | 309.6161   | -3728.1776  | 4073.9081 |
| 306.5726              | 270.9031    | 123.3987   | 656151.2420 | -26.6357  |

Supplementary Text 6

-26.6531  
 [6691]ENERGY: 7490000      3182.7035      5205.7203      5280.0807  
 339.3890      -15875.0411      -1767.0078      0.0000      0.0000  
 7647.8063      4013.6509      305.9505      -3634.1554      4073.2189  
 306.4566      -49.1026      -20.3053      656151.2420      -25.4469  
 -25.4342  
 [6730]ENERGY: 7500000      3143.4112      5172.9852      5219.3481  
 341.3786      -15766.4739      -1788.4428      0.0000      0.0000  
 7688.8572      4011.0637      307.5927      -3677.7935      4075.0361  
 306.6097      -138.1195      -84.1889      656151.2420      -23.7577  
 -23.7625  
 [6780]ENERGY: 7510000      3105.1642      5151.5461      5280.7231  
 325.7240      -15875.4830      -1692.5827      0.0000      0.0000  
 7715.5339      4010.6256      308.6599      -3704.9082      4074.4087  
 306.4444      186.0521      104.8310      656151.2420      -28.2541  
 -28.2578  
 [6816]ENERGY: 7520000      3186.3116      5233.4644      5270.6607  
 346.0387      -15850.0015      -1784.0012      0.0000      0.0000  
 7613.7197      4016.1924      304.5869      -3597.5273      4075.8031  
 306.5969      95.0169      23.6103      656151.2420      -22.1493  
 -22.1326  
 [6866]ENERGY: 7530000      3105.8622      5185.6197      5311.5031  
 350.8169      -15753.1887      -1796.2830      0.0000      0.0000  
 7606.8803      4011.2104      304.3132      -3595.6699      4075.7934  
 306.5074      191.3733      126.4354      656151.2420      -29.5943  
 -29.5919  
 [6902]ENERGY: 7540000      3177.3361      5169.3869      5294.0740  
 339.2640      -15814.5854      -1858.3156      0.0000      0.0000  
 7704.4902      4011.6500      308.2181      -3692.8401      4075.6363  
 306.6147      -14.1050      -76.4710      656151.2420      -23.6725  
 -23.6792  
 [6952]ENERGY: 7550000      3179.9518      5293.4068      5236.6624  
 342.2642      -15896.5899      -1754.7066      0.0000      0.0000  
 7615.4631      4016.4519      304.6566      -3599.0113      4075.8480  
 306.5914      123.3699      88.1999      656151.2420      -28.5872  
 -28.5682  
 [6988]ENERGY: 7560000      3148.4018      5085.6486      5206.7413  
 326.9200      -15853.9973      -1674.0935      0.0000      0.0000  
 7772.9303      4012.5511      310.9561      -3760.3792      4074.1066  
 306.3546      135.3363      14.6945      656151.2420      -25.0826  
 -25.0983  
 [7038]ENERGY: 7570000      3145.1269      5224.2044      5274.4881  
 322.9386      -15842.1154      -1797.2050      0.0000      0.0000  
 7685.8068      4013.2444      307.4707      -3672.5624      4075.9183  
 306.5546      -28.6992      -85.5542      656151.2420      -23.8205  
 -23.8122  
 [7074]ENERGY: 7580000      3199.1258      5213.3869      5289.0700  
 346.2669      -15879.3859      -1818.5642      0.0000      0.0000  
 7663.6855      4013.5850      306.5857      -3650.1005      4075.9231  
 306.5835      -19.0100      -46.1227      656151.2420      -22.1415  
 -22.1600  
 [7124]ENERGY: 7590000      3171.0508      5204.8084      5300.4008  
 328.3366      -15777.4238      -1709.2996      0.0000      0.0000  
 7502.1606      4020.0337      300.1239      -3482.1269      4074.9178

## Supplementary Text 6

|                       |             |            |             |           |
|-----------------------|-------------|------------|-------------|-----------|
| 306.4945              | 177.9439    | 186.7664   | 656151.2420 | -26.7771  |
| -26.7732              |             |            |             |           |
| [7163]ENERGY: 7600000 | 3234.7860   | 5225.0700  | 5234.5835   |           |
| 365.9936              | -15873.3476 | -1793.8521 | 0.0000      | 0.0000    |
| 7620.2758             | 4013.5091   | 304.8491   | -3606.7667  | 4075.4961 |
| 306.4738              | -99.8114    | -82.4409   | 656151.2420 | -21.5543  |
| -21.5515              |             |            |             |           |
| [7213]ENERGY: 7610000 | 3262.1252   | 5255.7793  | 5279.0388   |           |
| 333.4188              | -15899.0928 | -1767.9846 | 0.0000      | 0.0000    |
| 7554.9337             | 4018.2182   | 302.2351   | -3536.7155  | 4075.4798 |
| 306.5501              | -66.2533    | -204.5683  | 656151.2420 | -25.7379  |
| -25.7381              |             |            |             |           |
| [7249]ENERGY: 7620000 | 3197.8442   | 5179.9696  | 5263.2959   |           |
| 318.9784              | -15855.6152 | -1742.6602 | 0.0000      | 0.0000    |
| 7650.8034             | 4012.6160   | 306.0704   | -3638.1874  | 4076.0405 |
| 306.5169              | -38.0123    | 61.9256    | 656151.2420 | -25.7182  |
| -25.7046              |             |            |             |           |
| [7299]ENERGY: 7630000 | 3184.9372   | 5178.5699  | 5334.8177   |           |
| 341.7891              | -15911.0502 | -1739.3807 | 0.0000      | 0.0000    |
| 7623.9963             | 4013.6793   | 304.9980   | -3610.3170  | 4075.3161 |
| 306.4936              | -10.3918    | 7.9380     | 656151.2420 | -24.1003  |
| -24.1106              |             |            |             |           |
| [7335]ENERGY: 7640000 | 3262.2384   | 5226.5214  | 5240.6092   |           |
| 312.0666              | -15907.6076 | -1770.4235 | 0.0000      | 0.0000    |
| 7653.6180             | 4017.0225   | 306.1830   | -3636.5955  | 4075.9478 |
| 306.6698              | -74.0247    | -62.0028   | 656151.2420 | -25.1791  |
| -25.1891              |             |            |             |           |
| [7385]ENERGY: 7650000 | 3187.1587   | 5166.2511  | 5307.2548   |           |
| 331.3656              | -15888.2371 | -1798.2862 | 0.0000      | 0.0000    |
| 7711.5391             | 4017.0461   | 308.5001   | -3694.4930  | 4078.2648 |
| 306.5579              | -32.3796    | -45.7027   | 656151.2420 | -26.5622  |
| -26.5592              |             |            |             |           |
| [7421]ENERGY: 7660000 | 3176.5828   | 5081.4436  | 5234.7472   |           |
| 365.8136              | -15835.5133 | -1703.8571 | 0.0000      | 0.0000    |
| 7696.2323             | 4015.4490   | 307.8878   | -3680.7833  | 4076.4292 |
| 306.5918              | -66.2160    | 19.6122    | 656151.2420 | -25.0521  |
| -25.0399              |             |            |             |           |
| [7471]ENERGY: 7670000 | 3184.4447   | 5109.8427  | 5263.0388   |           |
| 352.8431              | -15906.1781 | -1708.7174 | 0.0000      | 0.0000    |
| 7719.9345             | 4015.2083   | 308.8360   | -3704.7262  | 4078.0733 |
| 306.3750              | 104.7590    | 74.9088    | 656151.2420 | -21.8430  |
| -21.8403              |             |            |             |           |
| [7507]ENERGY: 7680000 | 3194.3752   | 5230.0991  | 5249.1521   |           |
| 316.3017              | -15824.6783 | -1786.9794 | 0.0000      | 0.0000    |
| 7638.4604             | 4016.7307   | 305.5766   | -3621.7296  | 4078.5579 |
| 306.6846              | 68.6343     | 7.4646     | 656151.2420 | -22.9584  |
| -22.9884              |             |            |             |           |
| [7557]ENERGY: 7690000 | 3251.4878   | 5191.7763  | 5239.3925   |           |
| 351.4972              | -15938.1815 | -1713.8658 | 0.0000      | 0.0000    |
| 7633.8822             | 4015.9887   | 305.3935   | -3617.8935  | 4077.9365 |
| 306.6992              | 114.0947    | 26.8238    | 656151.2420 | -26.7286  |
| -26.7145              |             |            |             |           |
| [7596]ENERGY: 7700000 | 3163.7961   | 5223.0899  | 5248.0585   |           |
| 360.7699              | -15874.7119 | -1793.2431 | 0.0000      | 0.0000    |



## Supplementary Text 6

|                       |             |            |             |           |
|-----------------------|-------------|------------|-------------|-----------|
| 7689.2971             | 4017.0565   | 307.6103   | -3672.2407  | 4080.1170 |
| 306.7739              | -31.3841    | -33.0468   | 656151.2420 | -24.2737  |
| -24.2686              |             |            |             |           |
| [7646]ENERGY: 7710000 | 3175.5600   | 5252.4094  | 5230.4186   |           |
| 329.3147              | -15838.8085 | -1790.5772 | 0.0000      | 0.0000    |
| 7658.6326             | 4016.9495   | 306.3836   | -3641.6831  | 4078.6280 |
| 306.7585              | -149.9776   | -122.2921  | 656151.2420 | -28.0407  |
| -28.0238              |             |            |             |           |
| [7682]ENERGY: 7720000 | 3124.1452   | 5222.5846  | 5280.3119   |           |
| 338.8679              | -15841.8579 | -1706.2478 | 0.0000      | 0.0000    |
| 7601.6372             | 4019.4411   | 304.1035   | -3582.1961  | 4078.6735 |
| 306.7994              | 141.2149    | 126.4288   | 656151.2420 | -23.9668  |
| -23.9794              |             |            |             |           |
| [7732]ENERGY: 7730000 | 3158.9163   | 5203.0182  | 5258.0587   |           |
| 326.7957              | -15770.4737 | -1789.8712 | 0.0000      | 0.0000    |
| 7630.6878             | 4017.1318   | 305.2657   | -3613.5561  | 4078.3282 |
| 306.7815              | -199.3611   | -149.1831  | 656151.2420 | -29.0792  |
| -29.0785              |             |            |             |           |
| [7768]ENERGY: 7740000 | 3179.2109   | 5135.6525  | 5287.2943   |           |
| 329.3273              | -15869.9271 | -1700.8815 | 0.0000      | 0.0000    |
| 7662.2389             | 4022.9152   | 306.5279   | -3639.3237  | 4079.5485 |
| 306.8890              | 153.7325    | 133.3348   | 656151.2420 | -21.0444  |
| -21.0515              |             |            |             |           |
| [7818]ENERGY: 7750000 | 3194.6428   | 5228.4700  | 5267.3454   |           |
| 356.6492              | -15919.2009 | -1738.9318 | 0.0000      | 0.0000    |
| 7630.1542             | 4019.1289   | 305.2443   | -3611.0253  | 4079.9819 |
| 306.7132              | 6.0280      | -42.4009   | 656151.2420 | -30.1756  |
| -30.1855              |             |            |             |           |
| [7854]ENERGY: 7760000 | 3133.7403   | 5178.0448  | 5234.1745   |           |
| 344.1394              | -15862.5347 | -1754.1634 | 0.0000      | 0.0000    |
| 7740.5186             | 4013.9196   | 309.6594   | -3726.5991  | 4079.9881 |
| 306.8460              | -40.6017    | -70.1329   | 656151.2420 | -24.7050  |
| -24.6923              |             |            |             |           |
| [7904]ENERGY: 7770000 | 3167.4252   | 5166.0669  | 5257.3514   |           |
| 332.3282              | -15877.4591 | -1720.1018 | 0.0000      | 0.0000    |
| 7689.3996             | 4015.0105   | 307.6144   | -3674.3891  | 4079.8159 |
| 306.8917              | -70.0037    | -73.1464   | 656151.2420 | -28.3019  |
| -28.3070              |             |            |             |           |
| [7940]ENERGY: 7780000 | 3177.2014   | 5213.1954  | 5286.4644   |           |
| 332.4110              | -15878.4842 | -1713.3767 | 0.0000      | 0.0000    |
| 7603.1769             | 4020.5883   | 304.1651   | -3582.5886  | 4080.9810 |
| 306.8758              | -72.5676    | -2.8523    | 656151.2420 | -25.2572  |
| -25.2467              |             |            |             |           |
| [7990]ENERGY: 7790000 | 3171.6860   | 5216.1843  | 5242.5679   |           |
| 327.7095              | -15866.3610 | -1769.5919 | 0.0000      | 0.0000    |
| 7695.9700             | 4018.1648   | 307.8773   | -3677.8052  | 4082.8600 |
| 306.8867              | -14.7129    | -46.5576   | 656151.2420 | -26.4481  |
| -26.4598              |             |            |             |           |
| [8029]ENERGY: 7800000 | 3201.9120   | 5195.0291  | 5257.4217   |           |
| 344.5257              | -15850.6772 | -1760.9282 | 0.0000      | 0.0000    |
| 7637.5481             | 4024.8313   | 305.5401   | -3612.7168  | 4081.3435 |
| 306.9749              | 38.5328     | -31.5329   | 656151.2420 | -19.7435  |
| -19.7575              |             |            |             |           |
| [8079]ENERGY: 7810000 | 3147.2070   | 5195.5270  | 5286.2303   |           |

## Supplementary Text 6

|                       |             |            |             |           |
|-----------------------|-------------|------------|-------------|-----------|
| 337.9762              | -15932.4513 | -1766.6899 | 0.0000      | 0.0000    |
| 7751.6384             | 4019.4376   | 310.1043   | -3732.2007  | 4081.3075 |
| 306.9296              | 35.6649     | 20.6403    | 656151.2420 | -27.6017  |
| -27.5835              |             |            |             |           |
| [8115]ENERGY: 7820000 | 3136.6731   | 5259.2940  | 5250.6672   |           |
| 330.9258              | -15868.4018 | -1783.9170 | 0.0000      | 0.0000    |
| 7693.9891             | 4019.2303   | 307.7980   | -3674.7588  | 4079.5746 |
| 306.9005              | -28.3638    | -6.2896    | 656151.2420 | -25.5537  |
| -25.5550              |             |            |             |           |
| [8165]ENERGY: 7830000 | 3172.8465   | 5243.0366  | 5271.2497   |           |
| 334.3391              | -15878.4397 | -1683.4832 | 0.0000      | 0.0000    |
| 7561.2507             | 4020.7997   | 302.4878   | -3540.4510  | 4079.1621 |
| 306.9473              | -62.5604    | -36.4314   | 656151.2420 | -22.3340  |
| -22.3580              |             |            |             |           |
| [8201]ENERGY: 7840000 | 3178.9823   | 5138.9721  | 5289.2584   |           |
| 344.9393              | -15953.0642 | -1730.2538 | 0.0000      | 0.0000    |
| 7749.3329             | 4018.1669   | 310.0121   | -3731.1660  | 4079.5625 |
| 307.0323              | 63.3469     | 43.8338    | 656151.2420 | -27.8610  |
| -27.8343              |             |            |             |           |
| [8251]ENERGY: 7850000 | 3176.2353   | 5164.3433  | 5267.3405   |           |
| 326.1643              | -15834.4425 | -1753.3975 | 0.0000      | 0.0000    |
| 7671.4979             | 4017.7414   | 306.8983   | -3653.7565  | 4078.9383 |
| 306.9871              | -72.7291    | -4.5474    | 656151.2420 | -24.4813  |
| -24.4699              |             |            |             |           |
| [8287]ENERGY: 7860000 | 3178.5531   | 5214.3995  | 5258.8359   |           |
| 347.6250              | -15846.4609 | -1771.2162 | 0.0000      | 0.0000    |
| 7635.2190             | 4016.9554   | 305.4469   | -3618.2636  | 4079.4705 |
| 306.9230              | -163.3239   | -153.0735  | 656151.2420 | -26.7014  |
| -26.7195              |             |            |             |           |
| [8337]ENERGY: 7870000 | 3149.2098   | 5127.0464  | 5283.2048   |           |
| 354.0405              | -15890.1883 | -1764.7143 | 0.0000      | 0.0000    |
| 7756.8564             | 4015.4552   | 310.3130   | -3741.4012  | 4079.3528 |
| 306.9410              | 118.0224    | 20.1838    | 656151.2420 | -22.8006  |
| -22.7911              |             |            |             |           |
| [8373]ENERGY: 7880000 | 3279.2862   | 5257.5945  | 5212.2091   |           |
| 308.0437              | -15877.1090 | -1808.5947 | 0.0000      | 0.0000    |
| 7645.3206             | 4016.7506   | 305.8510   | -3628.5701  | 4079.6372 |
| 306.9370              | -23.2194    | -44.2143   | 656151.2420 | -25.0581  |
| -25.0575              |             |            |             |           |
| [8423]ENERGY: 7890000 | 3207.3512   | 5126.2827  | 5262.1780   |           |
| 364.0042              | -15910.2131 | -1779.6463 | 0.0000      | 0.0000    |
| 7748.9530             | 4018.9097   | 309.9969   | -3730.0433  | 4079.4906 |
| 307.0469              | 71.8388     | -44.1981   | 656151.2420 | -24.8325  |
| -24.8481              |             |            |             |           |
| [8462]ENERGY: 7900000 | 3162.3733   | 5215.9002  | 5257.3302   |           |
| 325.6365              | -15881.0298 | -1774.7136 | 0.0000      | 0.0000    |
| 7711.7524             | 4017.2491   | 308.5087   | -3694.5032  | 4080.5738 |
| 307.0146              | 98.3201     | 59.0830    | 656151.2420 | -23.4147  |
| -23.4012              |             |            |             |           |
| [8512]ENERGY: 7910000 | 3161.2491   | 5240.0357  | 5225.8228   |           |
| 336.1152              | -15832.2358 | -1823.5539 | 0.0000      | 0.0000    |
| 7711.8366             | 4019.2698   | 308.5120   | -3692.5669  | 4082.1463 |
| 307.0150              | 34.7966     | -44.2399   | 656151.2420 | -25.5246  |
| -25.5266              |             |            |             |           |

## Supplementary Text 6

|                       |             |            |             |           |
|-----------------------|-------------|------------|-------------|-----------|
| [8548]ENERGY: 7920000 | 3184.9597   | 5104.3918  | 5238.4314   |           |
| 344.0119              | -15845.2985 | -1767.8882 | 0.0000      | 0.0000    |
| 7758.5193             | 4017.1275   | 310.3796   | -3741.3918  | 4081.5074 |
| 306.8799              | 17.2429     | -5.3030    | 656151.2420 | -24.3577  |
| -24.3610              |             |            |             |           |
| [8598]ENERGY: 7930000 | 3216.9734   | 5092.8085  | 5226.7844   |           |
| 343.0855              | -15830.8048 | -1732.9109 | 0.0000      | 0.0000    |
| 7706.3874             | 4022.3235   | 308.2940   | -3684.0639  | 4081.0825 |
| 306.9506              | -78.8659    | -110.5851  | 656151.2420 | -26.6468  |
| -26.6569              |             |            |             |           |
| [8634]ENERGY: 7940000 | 3152.7552   | 5184.6821  | 5281.9237   |           |
| 345.6670              | -15857.2905 | -1771.6825 | 0.0000      | 0.0000    |
| 7683.9055             | 4019.9606   | 307.3946   | -3663.9448  | 4082.1114 |
| 306.9996              | -43.2302    | -33.3806   | 656151.2420 | -25.5369  |
| -25.5083              |             |            |             |           |
| [8684]ENERGY: 7950000 | 3166.2927   | 5220.8015  | 5277.5034   |           |
| 353.8355              | -15871.9795 | -1842.9772 | 0.0000      | 0.0000    |
| 7716.5164             | 4019.9929   | 308.6992   | -3696.5235  | 4082.6842 |
| 306.9187              | -184.0602   | -183.3137  | 656151.2420 | -23.8340  |
| -23.8594              |             |            |             |           |
| [8720]ENERGY: 7960000 | 3122.0300   | 5154.4274  | 5255.0615   |           |
| 338.0562              | -15825.9247 | -1719.8883 | 0.0000      | 0.0000    |
| 7693.1053             | 4016.8674   | 307.7627   | -3676.2379  | 4081.5778 |
| 306.6972              | -243.4510   | -116.0378  | 656151.2420 | -18.8959  |
| -18.8918              |             |            |             |           |
| [8770]ENERGY: 7970000 | 3150.8187   | 5263.3652  | 5230.9819   |           |
| 371.6066              | -15931.9519 | -1763.8250 | 0.0000      | 0.0000    |
| 7697.6410             | 4018.6364   | 307.9441   | -3679.0046  | 4082.7760 |
| 306.8805              | -21.7397    | -16.0024   | 656151.2420 | -25.1863  |
| -25.1765              |             |            |             |           |
| [8806]ENERGY: 7980000 | 3081.8924   | 5192.9016  | 5249.7787   |           |
| 338.7493              | -15839.4232 | -1761.9057 | 0.0000      | 0.0000    |
| 7754.0347             | 4016.0277   | 310.2002   | -3738.0069  | 4082.3568 |
| 306.8571              | -66.4135    | -65.6305   | 656151.2420 | -23.9223  |
| -23.9335              |             |            |             |           |
| [8856]ENERGY: 7990000 | 3241.1077   | 5184.8405  | 5249.8073   |           |
| 340.3692              | -15969.4379 | -1723.3316 | 0.0000      | 0.0000    |
| 7695.9589             | 4019.3142   | 307.8768   | -3676.6447  | 4083.0597 |
| 306.7441              | -23.9246    | -89.1451   | 656151.2420 | -23.3888  |
| -23.3890              |             |            |             |           |
| [8895]ENERGY: 8000000 | 3105.9169   | 5163.7836  | 5262.0419   |           |
| 328.9854              | -15772.2743 | -1725.9768 | 0.0000      | 0.0000    |
| 7660.7044             | 4023.1812   | 306.4665   | -3637.5232  | 4082.5025 |
| 306.7796              | 66.0510     | 67.5065    | 656151.2420 | -25.7829  |
| -25.7707              |             |            |             |           |
| [8945]ENERGY: 8010000 | 3204.9312   | 5173.7055  | 5235.4946   |           |
| 335.1634              | -15777.2973 | -1740.6999 | 0.0000      | 0.0000    |
| 7593.6329             | 4024.9305   | 303.7833   | -3568.7024  | 4083.7785 |
| 306.8689              | -37.0093    | 45.8441    | 656151.2420 | -21.8339  |
| -21.8441              |             |            |             |           |
| [8981]ENERGY: 8020000 | 3168.7124   | 5209.9957  | 5234.7367   |           |
| 319.3823              | -15829.7250 | -1715.5166 | 0.0000      | 0.0000    |
| 7634.7023             | 4022.2878   | 305.4263   | -3612.4145  | 4082.7840 |
| 306.8577              | 364.6388    | 221.0678   | 656151.2420 | -26.6690  |

Supplementary Text 6

-26.6771  
 [9031]ENERGY: 8030000      3192.7870      5182.5712      5260.1584  
 334.1999      -15804.5310      -1784.7906      0.0000      0.0000  
 7642.1520      4022.5469      305.7243      -3619.6051      4082.0323  
 306.8626      -19.4057      -5.2354      656151.2420      -24.3250  
 -24.3256  
 [9067]ENERGY: 8040000      3162.2307      5326.1490      5201.7864  
 343.9367      -15769.6886      -1771.3306      0.0000      0.0000  
 7530.7829      4023.8665      301.2690      -3506.9164      4082.3464  
 306.8016      -107.8967      10.7812      656151.2420      -26.3029  
 -26.2759  
 [9117]ENERGY: 8050000      3160.8642      5086.2462      5240.1800  
 329.5642      -15795.7425      -1726.3811      0.0000      0.0000  
 7725.3557      4020.0868      309.0529      -3705.2689      4083.1706  
 306.8092      128.1721      69.2583      656151.2420      -25.3353  
 -25.3476  
 [9153]ENERGY: 8060000      3089.3830      5211.6800      5243.3702  
 325.3329      -15800.5327      -1739.0368      0.0000      0.0000  
 7689.7289      4019.9255      307.6276      -3669.8034      4084.2726  
 306.9448      122.8602      73.2868      656151.2420      -26.0697  
 -26.0847  
 [9203]ENERGY: 8070000      3163.5522      5182.5006      5229.2294  
 326.3509      -15799.1661      -1741.8613      0.0000      0.0000  
 7660.1473      4020.7529      306.4442      -3639.3944      4083.5860  
 306.9897      116.3871      -0.2184      656151.2420      -23.2269  
 -23.2190  
 [9239]ENERGY: 8080000      3181.0175      5116.1882      5283.1235  
 363.0333      -15823.0125      -1772.1490      0.0000      0.0000  
 7675.4427      4023.6437      307.0561      -3651.7990      4083.4439  
 306.8234      118.2857      -9.5220      656151.2420      -26.4332  
 -26.4356  
 [9289]ENERGY: 8090000      3164.0713      5171.8055      5219.7469  
 343.0016      -15803.3647      -1771.4176      0.0000      0.0000  
 7697.6816      4021.5246      307.9457      -3676.1569      4082.9753  
 306.9531      14.4521      -52.8870      656151.2420      -25.6088  
 -25.6036  
 [9328]ENERGY: 8100000      3162.8373      5292.8772      5296.7159  
 324.3492      -15890.4778      -1761.6538      0.0000      0.0000  
 7599.0370      4023.6850      303.9995      -3575.3520      4083.6939  
 306.8299      58.1458      -5.0202      656151.2420      -23.3207  
 -23.3181  
 [9378]ENERGY: 8110000      3206.6466      5191.4992      5297.7045  
 354.5753      -15770.5018      -1848.3399      0.0000      0.0000  
 7593.3043      4024.8881      303.7701      -3568.4161      4082.7011  
 306.6773      -52.0261      -161.5308      656151.2420      -22.1767  
 -22.2001  
 [9414]ENERGY: 8120000      3080.5859      5149.7370      5295.8073  
 340.0469      -15732.1073      -1781.5673      0.0000      0.0000  
 7668.2982      4020.8007      306.7703      -3647.4975      4082.9288  
 306.8961      124.0249      58.3546      656151.2420      -32.4415  
 -32.4457  
 [9464]ENERGY: 8130000      3213.2569      5192.1038      5266.9612  
 350.3854      -15780.9333      -1830.7745      0.0000      0.0000  
 7613.9611      4024.9606      304.5965      -3589.0005      4085.0978

Supplementary Text 6

|                       |             |            |             |           |
|-----------------------|-------------|------------|-------------|-----------|
| 306.8104              | -162.3811   | -115.8036  | 656151.2420 | -23.4149  |
| -23.3786              |             |            |             |           |
| [9500]ENERGY: 8140000 | 3183.0513   | 5182.7600  | 5241.6926   |           |
| 328.5047              | -15768.1966 | -1838.2961 | 0.0000      | 0.0000    |
| 7693.8817             | 4023.3976   | 307.7937   | -3670.4841  | 4085.3700 |
| 307.0192              | -33.0088    | -75.3999   | 656151.2420 | -28.3207  |
| -28.3209              |             |            |             |           |
| [9550]ENERGY: 8150000 | 3233.5488   | 5102.7428  | 5242.9109   |           |
| 339.4348              | -15820.9144 | -1720.5161 | 0.0000      | 0.0000    |
| 7649.7584             | 4026.9653   | 306.0286   | -3622.7932  | 4085.6860 |
| 306.9932              | 60.8175     | 42.0026    | 656151.2420 | -20.4386  |
| -20.4480              |             |            |             |           |
| [9586]ENERGY: 8160000 | 3175.5877   | 5153.3989  | 5290.2987   |           |
| 343.9398              | -15854.9595 | -1756.6646 | 0.0000      | 0.0000    |
| 7669.8042             | 4021.4053   | 306.8305   | -3648.3989  | 4084.2224 |
| 307.1408              | -34.8057    | -26.3664   | 656151.2420 | -30.4385  |
| -30.4335              |             |            |             |           |
| [9636]ENERGY: 8170000 | 3128.0587   | 5287.6295  | 5260.2952   |           |
| 331.7053              | -15925.6000 | -1730.6372 | 0.0000      | 0.0000    |
| 7671.9253             | 4023.3769   | 306.9154   | -3648.5485  | 4085.6682 |
| 307.1333              | -19.6232    | -105.1670  | 656151.2420 | -25.3026  |
| -25.3209              |             |            |             |           |
| [9672]ENERGY: 8180000 | 3210.3434   | 5168.1861  | 5263.5893   |           |
| 358.3405              | -15919.4957 | -1786.3820 | 0.0000      | 0.0000    |
| 7727.5132             | 4022.0948   | 309.1392   | -3705.4184  | 4086.0871 |
| 307.0070              | 12.1393     | 18.7757    | 656151.2420 | -28.3210  |
| -28.2989              |             |            |             |           |
| [9722]ENERGY: 8190000 | 3262.6855   | 5122.7725  | 5253.9730   |           |
| 331.2991              | -15753.3274 | -1880.8785 | 0.0000      | 0.0000    |
| 7690.0226             | 4026.5467   | 307.6394   | -3663.4759  | 4087.1340 |
| 307.0410              | -106.5984   | -170.7965  | 656151.2420 | -26.0075  |
| -26.0180              |             |            |             |           |
| [9761]ENERGY: 8200000 | 3167.1962   | 5105.1644  | 5271.9470   |           |
| 329.4055              | -15743.8849 | -1815.7675 | 0.0000      | 0.0000    |
| 7712.1053             | 4026.1660   | 308.5228   | -3685.9393  | 4086.1186 |
| 306.8274              | -10.6781    | -47.8142   | 656151.2420 | -21.3480  |
| -21.3486              |             |            |             |           |
| [9811]ENERGY: 8210000 | 3200.6745   | 5257.3616  | 5283.7493   |           |
| 341.2528              | -15839.0852 | -1855.9332 | 0.0000      | 0.0000    |
| 7637.0788             | 4025.0987   | 305.5213   | -3611.9801  | 4086.4014 |
| 306.8152              | -26.7545    | -110.4467  | 656151.2420 | -25.7213  |
| -25.7075              |             |            |             |           |
| [9847]ENERGY: 8220000 | 3193.8075   | 5250.2635  | 5275.6377   |           |
| 353.7754              | -15983.7409 | -1764.9609 | 0.0000      | 0.0000    |
| 7699.3790             | 4024.1613   | 308.0137   | -3675.2177  | 4084.3847 |
| 306.9193              | -88.7549    | -15.1415   | 656151.2420 | -21.5010  |
| -21.5052              |             |            |             |           |
| [9897]ENERGY: 8230000 | 3184.6039   | 5236.7898  | 5279.5573   |           |
| 345.7264              | -15860.2210 | -1783.3802 | 0.0000      | 0.0000    |
| 7618.7047             | 4021.7810   | 304.7863   | -3596.9238  | 4085.6582 |
| 306.9666              | 56.3093     | -79.6124   | 656151.2420 | -27.4625  |
| -27.4634              |             |            |             |           |
| [9933]ENERGY: 8240000 | 3194.1397   | 5157.6933  | 5230.7955   |           |
| 345.8986              | -15859.0013 | -1755.0087 | 0.0000      | 0.0000    |

## Supplementary Text 6

|                        |             |            |             |           |
|------------------------|-------------|------------|-------------|-----------|
| 7709.3995              | 4023.9166   | 308.4145   | -3685.4829  | 4085.1235 |
| 306.8638               | -23.3152    | -81.1626   | 656151.2420 | -19.5576  |
| -19.5643               |             |            |             |           |
| [9983]ENERGY: 8250000  | 3124.8905   | 5182.3997  | 5280.4239   |           |
| 334.7998               | -15861.6498 | -1706.7528 | 0.0000      | 0.0000    |
| 7669.4026              | 4023.5140   | 306.8144   | -3645.8886  | 4087.2678 |
| 306.6091               | 82.5956     | 24.2084    | 656151.2420 | -29.9903  |
| -30.0002               |             |            |             |           |
| [10019]ENERGY: 8260000 | 3249.0757   | 5191.7971  | 5215.4918   |           |
| 349.7418               | -15782.2139 | -1816.1264 | 0.0000      | 0.0000    |
| 7620.4091              | 4028.1751   | 304.8545   | -3592.2340  | 4087.6628 |
| 307.0457               | -161.9058   | -249.7864  | 656151.2420 | -19.1716  |
| -19.1517               |             |            |             |           |
| [10069]ENERGY: 8270000 | 3253.0681   | 5169.6720  | 5224.4339   |           |
| 333.8330               | -15807.6749 | -1769.4789 | 0.0000      | 0.0000    |
| 7625.4364              | 4029.2896   | 305.0556   | -3596.1468  | 4087.2461 |
| 306.8198               | -123.5261   | -81.6444   | 656151.2420 | -26.0535  |
| -26.0711               |             |            |             |           |
| [10105]ENERGY: 8280000 | 3279.6943   | 5180.6863  | 5262.4093   |           |
| 344.4958               | -15908.5591 | -1757.8031 | 0.0000      | 0.0000    |
| 7626.1335              | 4027.0570   | 305.0835   | -3599.0765  | 4087.1634 |
| 306.7626               | 105.4823    | 18.1818    | 656151.2420 | -23.7466  |
| -23.7359               |             |            |             |           |
| [10155]ENERGY: 8290000 | 3165.5197   | 5239.7441  | 5290.4776   |           |
| 345.0010               | -15856.0837 | -1784.3802 | 0.0000      | 0.0000    |
| 7629.3908              | 4029.6692   | 305.2138   | -3599.7215  | 4087.6557 |
| 306.7467               | -116.7335   | -180.9736  | 656151.2420 | -25.8330  |
| -25.8428               |             |            |             |           |
| [10194]ENERGY: 8300000 | 3180.8265   | 5231.6259  | 5259.2238   |           |
| 343.1273               | -15834.6376 | -1842.0208 | 0.0000      | 0.0000    |
| 7685.3048              | 4023.4499   | 307.4506   | -3661.8550  | 4088.3992 |
| 306.7577               | -100.8852   | -110.6441  | 656151.2420 | -23.6645  |
| -23.6582               |             |            |             |           |
| [10244]ENERGY: 8310000 | 3247.6707   | 5062.1511  | 5245.9413   |           |
| 338.1506               | -15858.9761 | -1775.8594 | 0.0000      | 0.0000    |
| 7763.2065              | 4022.2848   | 310.5671   | -3740.9218  | 4086.9771 |
| 306.8634               | -153.7060   | -94.0096   | 656151.2420 | -21.7483  |
| -21.7634               |             |            |             |           |
| [10280]ENERGY: 8320000 | 3226.1120   | 5242.0783  | 5226.0314   |           |
| 329.3263               | -15847.2928 | -1774.0417 | 0.0000      | 0.0000    |
| 7624.9267              | 4027.1401   | 305.0352   | -3597.7866  | 4087.9148 |
| 306.8422               | 0.9739      | -13.8825   | 656151.2420 | -28.7675  |
| -28.7434               |             |            |             |           |
| [10330]ENERGY: 8330000 | 3161.1750   | 5267.8740  | 5283.6667   |           |
| 331.1101               | -15955.8305 | -1774.3394 | 0.0000      | 0.0000    |
| 7710.7665              | 4024.4224   | 308.4692   | -3686.3441  | 4087.9163 |
| 306.8701               | 87.9208     | -11.2787   | 656151.2420 | -21.5654  |
| -21.5697               |             |            |             |           |
| [10366]ENERGY: 8340000 | 3182.7569   | 5187.7447  | 5294.0073   |           |
| 348.9464               | -15899.4595 | -1730.5712 | 0.0000      | 0.0000    |
| 7640.0920              | 4023.5167   | 305.6419   | -3616.5754  | 4086.6540 |
| 306.8548               | 21.5126     | 33.7624    | 656151.2420 | -25.1932  |
| -25.2039               |             |            |             |           |
| [10416]ENERGY: 8350000 | 3202.2357   | 5203.6168  | 5262.5231   |           |

## Supplementary Text 6

|                        |             |            |             |           |
|------------------------|-------------|------------|-------------|-----------|
| 352.5758               | -15829.6380 | -1855.1267 | 0.0000      | 0.0000    |
| 7689.5655              | 4025.7522   | 307.6211   | -3663.8133  | 4088.2122 |
| 306.8166               | -119.1423   | -209.9213  | 656151.2420 | -20.9837  |
| -20.9827               |             |            |             |           |
| [10452]ENERGY: 8360000 | 3199.5701   | 5162.5155  | 5257.0811   |           |
| 318.0891               | -15750.7622 | -1826.7114 | 0.0000      | 0.0000    |
| 7662.3591              | 4022.1413   | 306.5327   | -3640.2178  | 4087.4860 |
| 306.8439               | 53.1615     | 57.2062    | 656151.2420 | -25.8513  |
| -25.8571               |             |            |             |           |
| [10502]ENERGY: 8370000 | 3153.8684   | 5201.7336  | 5261.4215   |           |
| 331.5102               | -15775.1564 | -1775.4492 | 0.0000      | 0.0000    |
| 7630.3519              | 4028.2799   | 305.2522   | -3602.0719  | 4088.2174 |
| 306.8419               | -10.1703    | -9.4263    | 656151.2420 | -22.5849  |
| -22.5623               |             |            |             |           |
| [10538]ENERGY: 8380000 | 3210.3983   | 5137.5654  | 5252.3910   |           |
| 344.5986               | -15834.4042 | -1788.6354 | 0.0000      | 0.0000    |
| 7705.1923              | 4027.1059   | 308.2462   | -3678.0864  | 4087.5174 |
| 306.9013               | 202.2251    | 93.9786    | 656151.2420 | -28.4199  |
| -28.4312               |             |            |             |           |
| [10588]ENERGY: 8390000 | 3204.7718   | 5208.3787  | 5242.2240   |           |
| 346.6457               | -15903.1807 | -1775.4771 | 0.0000      | 0.0000    |
| 7699.2578              | 4022.6201   | 308.0088   | -3676.6377  | 4088.2542 |
| 306.9213               | 1.3576      | -20.8929   | 656151.2420 | -23.4132  |
| -23.4106               |             |            |             |           |
| [10627]ENERGY: 8400000 | 3136.7369   | 5199.1126  | 5281.5305   |           |
| 325.7154               | -15778.9606 | -1752.5322 | 0.0000      | 0.0000    |
| 7615.6402              | 4027.2428   | 304.6637   | -3588.3974  | 4087.9527 |
| 307.0507               | 126.8880    | -6.3844    | 656151.2420 | -24.8085  |
| -24.8248               |             |            |             |           |
| [10677]ENERGY: 8410000 | 3160.0076   | 5253.9336  | 5249.5044   |           |
| 315.4355               | -15849.3080 | -1833.5925 | 0.0000      | 0.0000    |
| 7727.0193              | 4023.0000   | 309.1194   | -3704.0193  | 4088.6601 |
| 307.0153               | -134.4022   | -211.5011  | 656151.2420 | -27.3403  |
| -27.3402               |             |            |             |           |
| [10713]ENERGY: 8420000 | 3120.2458   | 5197.0945  | 5268.3239   |           |
| 345.9969               | -15821.9024 | -1697.8066 | 0.0000      | 0.0000    |
| 7617.4458              | 4029.3978   | 304.7359   | -3588.0479  | 4089.6801 |
| 306.9852               | 139.1532    | 2.9713     | 656151.2420 | -25.3442  |
| -25.3486               |             |            |             |           |
| [10763]ENERGY: 8430000 | 3215.3215   | 5158.7004  | 5300.3977   |           |
| 331.0564               | -15850.1991 | -1829.4684 | 0.0000      | 0.0000    |
| 7698.3965              | 4024.2050   | 307.9743   | -3674.1915  | 4089.8660 |
| 306.8117               | 125.3086    | 21.7154    | 656151.2420 | -23.2604  |
| -23.2382               |             |            |             |           |
| [10799]ENERGY: 8440000 | 3145.9113   | 5173.2262  | 5301.3632   |           |
| 342.4513               | -15805.5609 | -1693.9056 | 0.0000      | 0.0000    |
| 7564.7470              | 4028.2324   | 302.6277   | -3536.5146  | 4088.4575 |
| 306.9743               | 120.1529    | 64.3397    | 656151.2420 | -23.2804  |
| -23.2974               |             |            |             |           |
| [10849]ENERGY: 8450000 | 3179.3564   | 5228.9465  | 5264.4307   |           |
| 337.4090               | -15803.7209 | -1771.5774 | 0.0000      | 0.0000    |
| 7592.3479              | 4027.1922   | 303.7319   | -3565.1557  | 4089.9969 |
| 306.9896               | 187.6664    | 86.6196    | 656151.2420 | -23.7817  |
| -23.7808               |             |            |             |           |

## Supplementary Text 6

|                        |             |            |             |           |
|------------------------|-------------|------------|-------------|-----------|
| [10885]ENERGY: 8460000 | 3192.6616   | 5176.3071  | 5244.5510   |           |
| 347.5381               | -15769.7845 | -1845.2391 | 0.0000      | 0.0000    |
| 7682.8627              | 4028.8969   | 307.3529   | -3653.9658  | 4089.7537 |
| 306.8158               | -95.5679    | -123.0717  | 656151.2420 | -23.0276  |
| -23.0262               |             |            |             |           |
| [10935]ENERGY: 8470000 | 3183.9870   | 5162.6798  | 5267.5766   |           |
| 350.6595               | -15893.2688 | -1750.1954 | 0.0000      | 0.0000    |
| 7701.6454              | 4023.0842   | 308.1043   | -3678.5613  | 4088.4577 |
| 306.9608               | -165.2695   | -85.0450   | 656151.2420 | -27.2131  |
| -27.1960               |             |            |             |           |
| [10971]ENERGY: 8480000 | 3214.5154   | 5171.0997  | 5254.3388   |           |
| 365.8622               | -15803.7182 | -1827.8599 | 0.0000      | 0.0000    |
| 7657.4479              | 4031.6858   | 306.3362   | -3625.7620  | 4089.6300 |
| 306.9231               | -18.6522    | -102.4730  | 656151.2420 | -19.8287  |
| -19.8508               |             |            |             |           |
| [11021]ENERGY: 8490000 | 3200.7237   | 5189.7049  | 5301.5993   |           |
| 334.9556               | -15843.0681 | -1824.7340 | 0.0000      | 0.0000    |
| 7668.0744              | 4027.2558   | 306.7613   | -3640.8186  | 4089.6061 |
| 306.9968               | -172.7309   | -157.1070  | 656151.2420 | -24.4397  |
| -24.4287               |             |            |             |           |
| [11060]ENERGY: 8500000 | 3251.2581   | 5136.8376  | 5288.8049   |           |
| 346.9766               | -15799.3755 | -1822.1694 | 0.0000      | 0.0000    |
| 7625.1275              | 4027.4598   | 305.0432   | -3597.6676  | 4091.0304 |
| 306.8026               | -79.7327    | -90.0451   | 656151.2420 | -25.3254  |
| -25.3145               |             |            |             |           |
| [11110]ENERGY: 8510000 | 3191.0141   | 5127.5431  | 5253.1035   |           |
| 320.7246               | -15783.1929 | -1797.2738 | 0.0000      | 0.0000    |
| 7715.3207              | 4027.2393   | 308.6514   | -3688.0814  | 4090.4337 |
| 306.7678               | 46.6727     | -37.7739   | 656151.2420 | -24.0522  |
| -24.0680               |             |            |             |           |
| [11146]ENERGY: 8520000 | 3217.5020   | 5216.2366  | 5261.0994   |           |
| 329.1903               | -15841.7427 | -1802.5426 | 0.0000      | 0.0000    |
| 7647.4899              | 4027.2328   | 305.9378   | -3620.2571  | 4091.0283 |
| 306.6726               | 121.3664    | 31.8772    | 656151.2420 | -25.1186  |
| -25.1100               |             |            |             |           |
| [11196]ENERGY: 8530000 | 3285.8819   | 5057.4746  | 5275.9108   |           |
| 341.7153               | -15847.2611 | -1748.3279 | 0.0000      | 0.0000    |
| 7660.9612              | 4026.3547   | 306.4768   | -3634.6065  | 4090.9347 |
| 306.7024               | 43.2923     | 30.8905    | 656151.2420 | -24.5095  |
| -24.5118               |             |            |             |           |
| [11232]ENERGY: 8540000 | 3139.3082   | 5153.8267  | 5253.1255   |           |
| 337.8869               | -15795.0696 | -1836.4422 | 0.0000      | 0.0000    |
| 7771.1145              | 4023.7501   | 310.8834   | -3747.3645  | 4090.3286 |
| 306.8406               | 4.5102      | -56.3701   | 656151.2420 | -23.8574  |
| -23.8515               |             |            |             |           |
| [11282]ENERGY: 8550000 | 3127.9085   | 5229.6955  | 5256.6624   |           |
| 326.6636               | -15893.6184 | -1723.9696 | 0.0000      | 0.0000    |
| 7702.7016              | 4026.0436   | 308.1466   | -3676.6581  | 4089.4049 |
| 306.8762               | 90.0030     | 86.5296    | 656151.2420 | -24.6773  |
| -24.6690               |             |            |             |           |
| [11318]ENERGY: 8560000 | 3210.6146   | 5183.9070  | 5230.6920   |           |
| 324.9663               | -15783.6998 | -1726.8905 | 0.0000      | 0.0000    |
| 7591.0120              | 4030.6016   | 303.6784   | -3560.4105  | 4089.4681 |
| 306.8915               | 38.9943     | -43.5184   | 656151.2420 | -21.6886  |



## Supplementary Text 6

-21.7212  
 [11368]ENERGY: 8570000      3242.3543      5180.7203      5279.8993  
 351.1904      -15858.0011      -1799.0923      0.0000      0.0000  
 7629.0983      4026.1691      305.2021      -3602.9292      4089.0260  
 306.8525      -113.9762      -72.5549      656151.2420      -25.3323  
 -25.3025  
 [11404]ENERGY: 8580000      3208.8273      5227.2206      5237.6099  
 343.4979      -15859.1013      -1721.1965      0.0000      0.0000  
 7590.4309      4027.2888      303.6552      -3563.1421      4089.3123  
 306.8719      -2.9098      -8.2590      656151.2420      -21.6170  
 -21.6156  
 [11454]ENERGY: 8590000      3201.2911      5238.8339      5339.1493  
 309.4757      -15904.2888      -1798.3321      0.0000      0.0000  
 7640.5500      4026.6790      305.6602      -3613.8710      4089.7560  
 306.8579      30.5799      -33.3118      656151.2420      -25.5384  
 -25.5495  
 [11493]ENERGY: 8600000      3146.8665      5198.3214      5281.4255  
 329.7315      -15844.1798      -1755.5647      0.0000      0.0000  
 7671.2539      4027.8542      306.8885      -3643.3996      4088.9173  
 306.8479      32.0606      -26.6767      656151.2420      -24.4463  
 -24.4474  
 [11543]ENERGY: 8610000      3177.2448      5217.8876      5306.6557  
 355.0353      -15859.4733      -1822.6832      0.0000      0.0000  
 7647.9263      4022.5932      305.9553      -3625.3331      4089.3163  
 306.7596      -9.7502      -111.2272      656151.2420      -27.2419  
 -27.2411  
 [11579]ENERGY: 8620000      3205.8899      5092.0247      5307.7995  
 335.5659      -15890.6551      -1757.7711      0.0000      0.0000  
 7732.3802      4025.2340      309.3339      -3707.1462      4088.2354  
 306.9189      -23.2883      -10.1805      656151.2420      -23.3468  
 -23.3508  
 [11629]ENERGY: 8630000      3202.2872      5112.3958      5273.4585  
 376.5007      -15866.1332      -1757.9590      0.0000      0.0000  
 7688.3462      4028.8961      307.5723      -3659.4501      4088.4704  
 306.9274      59.8177      -89.7866      656151.2420      -26.5886  
 -26.5855  
 [11665]ENERGY: 8640000      3136.8486      5193.1647      5342.8659  
 339.8705      -15852.1723      -1841.1586      0.0000      0.0000  
 7706.1078      4025.5266      308.2828      -3680.5812      4088.8283  
 306.7942      30.2146      43.8339      656151.2420      -23.8030  
 -23.7920  
 [11715]ENERGY: 8650000      3245.2201      5184.0805      5284.1205  
 341.9025      -15885.3170      -1743.1119      0.0000      0.0000  
 7600.9128      4027.8075      304.0745      -3573.1053      4089.4777  
 307.0263      -69.3119      -91.7106      656151.2420      -19.1977  
 -19.2036  
 [11751]ENERGY: 8660000      3178.5076      5185.6990      5258.5413  
 356.9569      -15885.7967      -1764.3423      0.0000      0.0000  
 7699.8029      4029.3688      308.0306      -3670.4341      4089.6783  
 306.7506      -40.7761      -58.9908      656151.2420      -25.1803  
 -25.1911  
 [11801]ENERGY: 8670000      3109.8489      5137.5547      5290.1618  
 342.3865      -15792.7473      -1784.3255      0.0000      0.0000  
 7725.9201      4028.7992      309.0754      -3697.1209      4090.3803

## Supplementary Text 6

|                        |             |            |             |           |
|------------------------|-------------|------------|-------------|-----------|
| 306.8667               | -43.2120    | -46.6311   | 656151.2420 | -19.3137  |
| -19.2991               |             |            |             |           |
| [11837]ENERGY: 8680000 | 3185.9715   | 5177.7321  | 5269.2712   |           |
| 341.9391               | -15779.7490 | -1794.1589 | 0.0000      | 0.0000    |
| 7629.5935              | 4030.5994   | 305.2219   | -3598.9941  | 4091.7795 |
| 306.7869               | -197.4434   | -121.3172  | 656151.2420 | -23.1379  |
| -23.1380               |             |            |             |           |
| [11887]ENERGY: 8690000 | 3190.1358   | 5130.0044  | 5322.4462   |           |
| 337.2552               | -15832.1691 | -1795.5124 | 0.0000      | 0.0000    |
| 7675.6964              | 4027.8565   | 307.0662   | -3647.8399  | 4091.7980 |
| 306.8802               | 81.8156     | 38.3048    | 656151.2420 | -19.3560  |
| -19.3591               |             |            |             |           |
| [11926]ENERGY: 8700000 | 3127.1071   | 5197.4227  | 5261.4065   |           |
| 342.9456               | -15898.9758 | -1698.5021 | 0.0000      | 0.0000    |
| 7698.1776              | 4029.5816   | 307.9656   | -3668.5961  | 4091.2979 |
| 306.8412               | 127.8327    | 51.1357    | 656151.2420 | -22.1547  |
| -22.1515               |             |            |             |           |
| [11976]ENERGY: 8710000 | 3212.4472   | 5274.5301  | 5198.2616   |           |
| 326.0253               | -15808.3040 | -1798.7308 | 0.0000      | 0.0000    |
| 7625.6266              | 4029.8560   | 305.0632   | -3595.7706  | 4091.4041 |
| 307.0217               | 88.7431     | 63.3797    | 656151.2420 | -29.0343  |
| -29.0277               |             |            |             |           |
| [12012]ENERGY: 8720000 | 3114.1226   | 5219.7329  | 5226.4670   |           |
| 327.5476               | -15787.9850 | -1809.9681 | 0.0000      | 0.0000    |
| 7736.8639              | 4026.7809   | 309.5132   | -3710.0830  | 4091.4617 |
| 307.0418               | -21.5742    | -39.7806   | 656151.2420 | -21.8259  |
| -21.8512               |             |            |             |           |
| [12062]ENERGY: 8730000 | 3231.0185   | 5197.6973  | 5209.8843   |           |
| 334.6283               | -15826.0743 | -1774.4204 | 0.0000      | 0.0000    |
| 7658.6347              | 4031.3684   | 306.3837   | -3627.2663  | 4092.0405 |
| 306.9972               | 23.2837     | -1.6523    | 656151.2420 | -26.5910  |
| -26.5752               |             |            |             |           |
| [12098]ENERGY: 8740000 | 3164.7113   | 5174.3436  | 5254.6488   |           |
| 310.7343               | -15838.7289 | -1793.3363 | 0.0000      | 0.0000    |
| 7754.9771              | 4027.3498   | 310.2379   | -3727.6272  | 4091.2014 |
| 306.8463               | -288.9287   | -203.7770  | 656151.2420 | -22.7335  |
| -22.7317               |             |            |             |           |
| [12148]ENERGY: 8750000 | 3289.4209   | 5087.7580  | 5248.5988   |           |
| 341.4113               | -15832.3536 | -1778.8347 | 0.0000      | 0.0000    |
| 7673.4787              | 4029.4793   | 306.9775   | -3643.9994  | 4090.9000 |
| 306.9380               | -139.6902   | -142.0348  | 656151.2420 | -25.1489  |
| -25.1612               |             |            |             |           |
| [12184]ENERGY: 8760000 | 3216.2774   | 5236.9836  | 5284.6617   |           |
| 322.5886               | -15881.6105 | -1784.1414 | 0.0000      | 0.0000    |
| 7633.6046              | 4028.3641   | 305.3823   | -3605.2405  | 4092.0503 |
| 306.9883               | 50.5927     | 7.8956     | 656151.2420 | -23.8453  |
| -23.8293               |             |            |             |           |
| [12234]ENERGY: 8770000 | 3159.7957   | 5125.5660  | 5297.0909   |           |
| 344.7088               | -15829.4342 | -1711.8879 | 0.0000      | 0.0000    |
| 7645.6938              | 4031.5332   | 305.8660   | -3614.1606  | 4092.3519 |
| 306.8872               | 131.6973    | 69.9015    | 656151.2420 | -23.9243  |
| -23.9388               |             |            |             |           |
| [12270]ENERGY: 8780000 | 3199.9096   | 5201.5115  | 5257.6248   |           |
| 345.9297               | -15872.8402 | -1750.5211 | 0.0000      | 0.0000    |

## Supplementary Text 6

|                        |             |            |             |           |
|------------------------|-------------|------------|-------------|-----------|
| 7647.2849              | 4028.8991   | 305.9296   | -3618.3857  | 4091.4182 |
| 306.8658               | -45.9826    | -6.8153    | 656151.2420 | -24.9830  |
| -24.9805               |             |            |             |           |
| [12320]ENERGY: 8790000 | 3213.1082   | 5092.9481  | 5242.0228   |           |
| 340.5724               | -15850.3738 | -1690.5780 | 0.0000      | 0.0000    |
| 7682.1505              | 4029.8502   | 307.3244   | -3652.3003  | 4091.4205 |
| 306.9120               | 85.1939     | 86.2243    | 656151.2420 | -23.4606  |
| -23.4532               |             |            |             |           |
| [12359]ENERGY: 8800000 | 3205.9179   | 5191.4396  | 5225.3568   |           |
| 321.3518               | -15767.3435 | -1809.3484 | 0.0000      | 0.0000    |
| 7665.3217              | 4032.6959   | 306.6512   | -3632.6258  | 4092.8008 |
| 306.8112               | -27.2524    | -68.5424   | 656151.2420 | -26.2763  |
| -26.2834               |             |            |             |           |
| [12409]ENERGY: 8810000 | 3164.1815   | 5229.7149  | 5269.6419   |           |
| 317.8718               | -15835.3567 | -1723.5360 | 0.0000      | 0.0000    |
| 7609.6713              | 4032.1888   | 304.4249   | -3577.4825  | 4093.4206 |
| 306.8848               | 283.2556    | 153.1582   | 656151.2420 | -21.8722  |
| -21.8693               |             |            |             |           |
| [12445]ENERGY: 8820000 | 3095.2322   | 5210.8425  | 5316.6951   |           |
| 333.0645               | -15839.3279 | -1756.1505 | 0.0000      | 0.0000    |
| 7671.5570              | 4031.9129   | 306.9006   | -3639.6441  | 4093.8969 |
| 306.6017               | -75.8693    | -111.3207  | 656151.2420 | -26.8111  |
| -26.8265               |             |            |             |           |
| [12495]ENERGY: 8830000 | 3130.3841   | 5259.7700  | 5252.0597   |           |
| 345.2206               | -15844.8267 | -1756.9578 | 0.0000      | 0.0000    |
| 7643.6797              | 4029.3294   | 305.7854   | -3614.3502  | 4093.0548 |
| 306.8569               | -6.1787     | -18.2737   | 656151.2420 | -23.5886  |
| -23.5765               |             |            |             |           |
| [12531]ENERGY: 8840000 | 3127.7560   | 5152.4762  | 5286.5888   |           |
| 346.4429               | -15851.2026 | -1700.6687 | 0.0000      | 0.0000    |
| 7666.2259              | 4027.6186   | 306.6874   | -3638.6073  | 4092.3281 |
| 306.7412               | -23.2198    | -41.1553   | 656151.2420 | -23.5997  |
| -23.6089               |             |            |             |           |
| [12581]ENERGY: 8850000 | 3267.6898   | 5204.0566  | 5281.2922   |           |
| 338.4805               | -15851.3290 | -1827.3562 | 0.0000      | 0.0000    |
| 7618.2284              | 4031.0623   | 304.7672   | -3587.1661  | 4091.9263 |
| 306.8258               | -191.3223   | -125.6953  | 656151.2420 | -28.5200  |
| -28.5077               |             |            |             |           |
| [12617]ENERGY: 8860000 | 3173.1451   | 5214.7958  | 5256.5051   |           |
| 338.0253               | -15740.0186 | -1893.3572 | 0.0000      | 0.0000    |
| 7682.2385              | 4031.3340   | 307.3279   | -3650.9045  | 4093.2616 |
| 306.8513               | -231.8937   | -197.2019  | 656151.2420 | -21.0417  |
| -21.0395               |             |            |             |           |
| [12667]ENERGY: 8870000 | 3111.4502   | 5182.5425  | 5274.1268   |           |
| 341.9200               | -15795.7752 | -1742.5706 | 0.0000      | 0.0000    |
| 7659.4609              | 4031.1545   | 306.4167   | -3628.3065  | 4092.5081 |
| 306.6071               | 127.8232    | 80.9535    | 656151.2420 | -26.2344  |
| -26.2482               |             |            |             |           |
| [12703]ENERGY: 8880000 | 3188.2696   | 5085.9122  | 5284.9221   |           |
| 325.2492               | -15837.7033 | -1757.3007 | 0.0000      | 0.0000    |
| 7740.9442              | 4030.2934   | 309.6765   | -3710.6508  | 4092.6969 |
| 306.5580               | 108.9280    | -1.2549    | 656151.2420 | -32.6649  |
| -32.6662               |             |            |             |           |
| [12753]ENERGY: 8890000 | 3146.9955   | 5193.5200  | 5276.3990   |           |

## Supplementary Text 6

|                        |             |            |             |           |
|------------------------|-------------|------------|-------------|-----------|
| 352.3633               | -15925.3273 | -1696.7170 | 0.0000      | 0.0000    |
| 7683.0977              | 4030.3312   | 307.3623   | -3652.7665  | 4092.8376 |
| 306.8716               | 83.9126     | 53.3693    | 656151.2420 | -31.0205  |
| -31.0195               |             |            |             |           |
| [12792]ENERGY: 8900000 | 3174.6395   | 5215.2294  | 5304.6500   |           |
| 334.6365               | -15945.2965 | -1747.2640 | 0.0000      | 0.0000    |
| 7694.2862              | 4030.8810   | 307.8099   | -3663.4052  | 4093.4343 |
| 307.0014               | -3.6079     | 14.7862    | 656151.2420 | -24.7734  |
| -24.7675               |             |            |             |           |
| [12842]ENERGY: 8910000 | 3116.7647   | 5136.0472  | 5263.1365   |           |
| 365.0332               | -15797.5045 | -1741.5481 | 0.0000      | 0.0000    |
| 7690.5663              | 4032.4952   | 307.6611   | -3658.0711  | 4093.9771 |
| 306.9795               | 126.7971    | 64.9038    | 656151.2420 | -25.6994  |
| -25.6958               |             |            |             |           |
| [12878]ENERGY: 8920000 | 3160.0789   | 5162.5044  | 5297.0080   |           |
| 346.5099               | -15779.9764 | -1764.2803 | 0.0000      | 0.0000    |
| 7611.9301              | 4033.7747   | 304.5153   | -3578.1554  | 4093.4898 |
| 306.9695               | -87.2742    | -104.1213  | 656151.2420 | -29.6784  |
| -29.6883               |             |            |             |           |
| [12928]ENERGY: 8930000 | 3205.1385   | 5207.0357  | 5293.1638   |           |
| 322.4827               | -15888.6068 | -1748.4092 | 0.0000      | 0.0000    |
| 7646.2535              | 4037.0582   | 305.8884   | -3609.1953  | 4095.0619 |
| 306.8036               | -35.2665    | -31.7947   | 656151.2420 | -30.4240  |
| -30.3926               |             |            |             |           |
| [12964]ENERGY: 8940000 | 3229.4180   | 5166.1376  | 5260.4900   |           |
| 357.5706               | -15896.7081 | -1731.7932 | 0.0000      | 0.0000    |
| 7647.8054              | 4032.9202   | 305.9505   | -3614.8852  | 4094.2012 |
| 306.8243               | -50.3836    | -45.7247   | 656151.2420 | -21.1794  |
| -21.2065               |             |            |             |           |
| [13014]ENERGY: 8950000 | 3263.0609   | 5146.0783  | 5254.7939   |           |
| 337.5657               | -15856.2975 | -1721.5452 | 0.0000      | 0.0000    |
| 7608.7902              | 4032.4464   | 304.3897   | -3576.3439  | 4093.7725 |
| 306.7200               | -1.0842     | -99.6220   | 656151.2420 | -25.4217  |
| -25.4157               |             |            |             |           |
| [13050]ENERGY: 8960000 | 3215.9374   | 5172.2446  | 5205.6666   |           |
| 363.5219               | -15912.8414 | -1685.4533 | 0.0000      | 0.0000    |
| 7675.2871              | 4034.3629   | 307.0499   | -3640.9242  | 4094.6081 |
| 306.7478               | 90.4859     | -13.1131   | 656151.2420 | -21.5010  |
| -21.5031               |             |            |             |           |
| [13100]ENERGY: 8970000 | 3168.8564   | 5131.1603  | 5282.5517   |           |
| 322.1368               | -15800.0934 | -1684.9572 | 0.0000      | 0.0000    |
| 7612.2522              | 4031.9069   | 304.5281   | -3580.3453  | 4095.2609 |
| 306.7378               | 146.7916    | 50.9329    | 656151.2420 | -28.7475  |
| -28.7590               |             |            |             |           |
| [13136]ENERGY: 8980000 | 3238.8200   | 5216.3934  | 5258.0688   |           |
| 331.9300               | -15903.3650 | -1789.8683 | 0.0000      | 0.0000    |
| 7683.3350              | 4035.3138   | 307.3718   | -3648.0212  | 4094.3828 |
| 306.7334               | 109.7141    | 38.4760    | 656151.2420 | -21.7545  |
| -21.7116               |             |            |             |           |
| [13186]ENERGY: 8990000 | 3243.6313   | 5250.6295  | 5299.5216   |           |
| 325.3831               | -15926.3115 | -1813.2804 | 0.0000      | 0.0000    |
| 7654.4161              | 4033.9897   | 306.2149   | -3620.4265  | 4096.0790 |
| 306.6005               | -3.7415     | -71.4044   | 656151.2420 | -26.5632  |
| -26.6023               |             |            |             |           |

## Supplementary Text 6

|                        |             |            |             |           |
|------------------------|-------------|------------|-------------|-----------|
| [13225]ENERGY: 9000000 | 3138.9800   | 5150.3903  | 5262.1925   |           |
| 357.6284               | -15805.2260 | -1743.4437 | 0.0000      | 0.0000    |
| 7673.6410              | 4034.1623   | 306.9840   | -3639.4786  | 4097.5156 |
| 306.7438               | -38.0461    | -26.9372   | 656151.2420 | -28.1542  |
| -28.1549               |             |            |             |           |
| [13275]ENERGY: 9010000 | 3166.2968   | 5154.1364  | 5256.3751   |           |
| 343.4498               | -15882.9356 | -1764.0061 | 0.0000      | 0.0000    |
| 7758.1076              | 4031.4239   | 310.3631   | -3726.6836  | 4097.7645 |
| 306.8163               | -8.7613     | 11.4454    | 656151.2420 | -24.7276  |
| -24.7194               |             |            |             |           |
| [13311]ENERGY: 9020000 | 3203.2899   | 5143.0578  | 5222.2482   |           |
| 327.4151               | -15860.5475 | -1669.1365 | 0.0000      | 0.0000    |
| 7670.3243              | 4036.6513   | 306.8513   | -3633.6730  | 4098.2759 |
| 306.8114               | -9.4276     | -29.4920   | 656151.2420 | -28.5348  |
| -28.5295               |             |            |             |           |
| [13361]ENERGY: 9030000 | 3260.9197   | 5206.2784  | 5235.0533   |           |
| 336.3430               | -15885.2213 | -1804.1502 | 0.0000      | 0.0000    |
| 7687.9106              | 4037.1334   | 307.5549   | -3650.7773  | 4099.0866 |
| 306.8112               | -107.4858   | -92.8662   | 656151.2420 | -24.8395  |
| -24.8455               |             |            |             |           |
| [13397]ENERGY: 9040000 | 3191.9385   | 5226.1732  | 5288.0020   |           |
| 346.5610               | -15849.7490 | -1827.6593 | 0.0000      | 0.0000    |
| 7660.7240              | 4035.9904   | 306.4673   | -3624.7336  | 4099.8352 |
| 306.8648               | -85.6970    | -81.7097   | 656151.2420 | -21.1331  |
| -21.1223               |             |            |             |           |
| [13447]ENERGY: 9050000 | 3168.0839   | 5214.2540  | 5294.2627   |           |
| 340.3868               | -15926.1519 | -1745.3750 | 0.0000      | 0.0000    |
| 7685.2757              | 4030.7361   | 307.4495   | -3654.5396  | 4098.1922 |
| 306.8218               | 33.4245     | 7.6127     | 656151.2420 | -25.7298  |
| -25.7278               |             |            |             |           |
| [13483]ENERGY: 9060000 | 3228.5715   | 5126.7803  | 5277.4533   |           |
| 351.6428               | -15881.2384 | -1698.9225 | 0.0000      | 0.0000    |
| 7637.4281              | 4041.7151   | 305.5353   | -3595.7130  | 4099.0317 |
| 306.8776               | 165.2390    | 40.5708    | 656151.2420 | -26.3170  |
| -26.3260               |             |            |             |           |
| [13533]ENERGY: 9070000 | 3230.6279   | 5088.8746  | 5299.9356   |           |
| 337.7736               | -15804.3728 | -1748.2772 | 0.0000      | 0.0000    |
| 7630.5235              | 4035.0852   | 305.2591   | -3595.4383  | 4098.7918 |
| 307.1665               | -78.8437    | -35.0967   | 656151.2420 | -23.5828  |
| -23.5813               |             |            |             |           |
| [13569]ENERGY: 9080000 | 3164.9491   | 5247.3616  | 5241.6370   |           |
| 330.0719               | -15884.5373 | -1749.6294 | 0.0000      | 0.0000    |
| 7689.4217              | 4039.2746   | 307.6153   | -3650.1471  | 4099.9292 |
| 307.3288               | 61.8945     | -5.9302    | 656151.2420 | -26.3660  |
| -26.3710               |             |            |             |           |
| [13619]ENERGY: 9090000 | 3241.5527   | 5231.1547  | 5231.2142   |           |
| 330.5429               | -15952.1847 | -1736.0189 | 0.0000      | 0.0000    |
| 7688.7708              | 4035.0318   | 307.5893   | -3653.7389  | 4098.2392 |
| 307.4171               | -123.1938   | -124.2731  | 656151.2420 | -18.5701  |
| -18.5474               |             |            |             |           |
| [13658]ENERGY: 9100000 | 3109.3043   | 5161.9194  | 5322.0005   |           |
| 344.3760               | -15856.4421 | -1740.3096 | 0.0000      | 0.0000    |
| 7697.9951              | 4038.8437   | 307.9583   | -3659.1514  | 4098.4312 |
| 307.0471               | 74.9042     | -14.9053   | 656151.2420 | -28.6106  |

Supplementary Text 6

-28.6170  
 [13708]ENERGY: 9110000      3207.7617      5152.8784      5265.7656  
 357.2680      -15833.5500      -1764.8386      0.0000      0.0000  
 7653.6864      4038.9715      306.1857      -3614.7148      4099.7826  
 306.7723      31.8720      -4.9621      656151.2420      -29.2271  
 -29.2219  
 [13744]ENERGY: 9120000      3181.3162      5208.3268      5273.3365  
 334.6453      -15790.8204      -1842.9146      0.0000      0.0000  
 7675.4936      4039.3834      307.0581      -3636.1102      4100.1876  
 306.9344      -33.5460      -59.5726      656151.2420      -24.1991  
 -24.2121  
 [13794]ENERGY: 9130000      3225.5009      5096.0127      5231.3385  
 347.1480      -15817.8971      -1731.4518      0.0000      0.0000  
 7689.0317      4039.6829      307.5997      -3649.3487      4100.0834  
 307.0772      -90.3632      -134.2584      656151.2420      -31.7751  
 -31.7693  
 [13830]ENERGY: 9140000      3239.6856      5149.3567      5312.3100  
 327.1013      -15882.1624      -1801.7713      0.0000      0.0000  
 7694.8685      4039.3884      307.8332      -3655.4801      4100.9572  
 307.0581      129.5620      -72.0871      656151.2420      -23.5272  
 -23.5626  
 [13880]ENERGY: 9150000      3145.3091      5196.0351      5248.8976  
 346.6536      -15781.3256      -1862.9519      0.0000      0.0000  
 7745.1522      4037.7701      309.8448      -3707.3821      4101.6297  
 307.1512      33.6977      -85.4538      656151.2420      -30.0364  
 -30.0191  
 [13916]ENERGY: 9160000      3148.2049      5147.6624      5201.6431  
 332.5861      -15785.1996      -1808.5316      0.0000      0.0000  
 7801.1872      4037.5525      312.0865      -3763.6347      4101.2422  
 307.0842      78.1675      -27.1632      656151.2420      -24.2402  
 -24.2292  
 [13966]ENERGY: 9170000      3296.5018      5089.4577      5283.3106  
 355.3031      -15866.5737      -1735.6410      0.0000      0.0000  
 7616.9296      4039.2883      304.7153      -3577.6413      4100.1892  
 307.1597      -85.6474      -66.5005      656151.2420      -28.9000  
 -28.8960  
 [14002]ENERGY: 9180000      3138.3233      5161.7229      5270.3997  
 347.4248      -15906.4332      -1667.8023      0.0000      0.0000  
 7696.6401      4040.2753      307.9041      -3656.3648      4100.7566  
 307.0832      -2.6071      -50.3406      656151.2420      -27.6508  
 -27.6528  
 [14052]ENERGY: 9190000      3201.0281      5174.5508      5304.3749  
 323.8177      -15796.7581      -1781.4335      0.0000      0.0000  
 7614.0789      4039.6588      304.6012      -3574.4201      4099.8055  
 307.0837      -110.3172      -148.7014      656151.2420      -27.1571  
 -27.1522  
 [14091]ENERGY: 9200000      3195.2672      5275.3947      5270.5465  
 318.8968      -15920.7504      -1664.7884      0.0000      0.0000  
 7565.3612      4039.9277      302.6523      -3525.4335      4099.7085  
 307.0763      110.9100      75.9930      656151.2420      -27.1766  
 -27.1795  
 [14141]ENERGY: 9210000      3221.8271      5210.2187      5256.0377  
 350.9205      -15847.0104      -1795.2260      0.0000      0.0000  
 7643.9309      4040.6985      305.7955      -3603.2325      4101.5739

## Supplementary Text 6

|                        |             |            |             |           |
|------------------------|-------------|------------|-------------|-----------|
| 307.1839               | -199.1135   | -157.0692  | 656151.2420 | -25.4846  |
| -25.4838               |             |            |             |           |
| [14177]ENERGY: 9220000 | 3223.4735   | 5264.8014  | 5282.0599   |           |
| 343.2195               | -15864.1406 | -1800.8542 | 0.0000      | 0.0000    |
| 7595.3947              | 4043.9541   | 303.8538   | -3551.4406  | 4102.2077 |
| 307.1014               | 103.4642    | 56.9972    | 656151.2420 | -24.5732  |
| -24.5895               |             |            |             |           |
| [14227]ENERGY: 9230000 | 3170.6515   | 5178.8969  | 5276.0569   |           |
| 360.4228               | -15840.4047 | -1734.3882 | 0.0000      | 0.0000    |
| 7628.8307              | 4040.0659   | 305.1914   | -3588.7648  | 4102.2834 |
| 307.1958               | 0.8297      | -47.1989   | 656151.2420 | -25.8412  |
| -25.8396               |             |            |             |           |
| [14263]ENERGY: 9240000 | 3221.9234   | 5251.6983  | 5223.8007   |           |
| 329.9882               | -15761.8505 | -1799.4012 | 0.0000      | 0.0000    |
| 7578.0347              | 4044.1936   | 303.1593   | -3533.8411  | 4102.1992 |
| 307.0018               | 103.0194    | 19.1195    | 656151.2420 | -23.2766  |
| -23.2622               |             |            |             |           |
| [14313]ENERGY: 9250000 | 3162.0794   | 5185.9341  | 5221.3507   |           |
| 329.5275               | -15821.7727 | -1788.0740 | 0.0000      | 0.0000    |
| 7752.0364              | 4041.0814   | 310.1202   | -3710.9550  | 4102.5563 |
| 307.0187               | -51.4140    | -27.6842   | 656151.2420 | -24.9259  |
| -24.9251               |             |            |             |           |
| [14349]ENERGY: 9260000 | 3197.6231   | 5170.0583  | 5302.7716   |           |
| 344.2582               | -15792.9315 | -1828.3634 | 0.0000      | 0.0000    |
| 7652.4329              | 4045.8492   | 306.1356   | -3606.5837  | 4103.7203 |
| 307.1913               | 98.3226     | 22.3489    | 656151.2420 | -20.5094  |
| -20.5225               |             |            |             |           |
| [14399]ENERGY: 9270000 | 3163.9266   | 5255.4603  | 5233.2686   |           |
| 329.5259               | -15845.4514 | -1755.9103 | 0.0000      | 0.0000    |
| 7659.6892              | 4040.5089   | 306.4259   | -3619.1803  | 4102.1645 |
| 307.2631               | -94.1815    | -75.1593   | 656151.2420 | -26.2298  |
| -26.2219               |             |            |             |           |
| [14435]ENERGY: 9280000 | 3186.3670   | 5148.0313  | 5280.7894   |           |
| 321.1542               | -15834.6619 | -1711.6612 | 0.0000      | 0.0000    |
| 7649.9109              | 4039.9295   | 306.0347   | -3609.9813  | 4102.3043 |
| 307.0943               | 59.3516     | -46.5371   | 656151.2420 | -27.1894  |
| -27.1829               |             |            |             |           |
| [14485]ENERGY: 9290000 | 3231.2796   | 5222.2421  | 5232.0869   |           |
| 329.6186               | -15851.7192 | -1765.6242 | 0.0000      | 0.0000    |
| 7643.7344              | 4041.6182   | 305.7876   | -3602.1162  | 4101.9118 |
| 307.2027               | -140.0790   | -163.2346  | 656151.2420 | -25.0387  |
| -25.0416               |             |            |             |           |
| [14524]ENERGY: 9300000 | 3233.6983   | 5210.0644  | 5275.0365   |           |
| 349.1486               | -15871.6359 | -1771.4437 | 0.0000      | 0.0000    |
| 7615.5086              | 4040.3768   | 304.6584   | -3575.1318  | 4102.1535 |
| 307.2985               | -200.7235   | -189.7437  | 656151.2420 | -27.5892  |
| -27.6145               |             |            |             |           |
| [14574]ENERGY: 9310000 | 3133.9861   | 5207.0655  | 5275.4255   |           |
| 327.9560               | -15892.4632 | -1746.6785 | 0.0000      | 0.0000    |
| 7734.1047              | 4039.3961   | 309.4029   | -3694.7086  | 4101.7062 |
| 307.2700               | -95.8898    | -19.9400   | 656151.2420 | -20.5342  |
| -20.4927               |             |            |             |           |
| [14610]ENERGY: 9320000 | 3231.8850   | 5131.9580  | 5283.5163   |           |
| 340.5982               | -15982.1573 | -1640.9334 | 0.0000      | 0.0000    |

## Supplementary Text 6

|                        |             |            |             |           |
|------------------------|-------------|------------|-------------|-----------|
| 7674.9498              | 4039.8166   | 307.0364   | -3635.1332  | 4100.9103 |
| 307.3329               | -71.0274    | -7.4253    | 656151.2420 | -22.7343  |
| -22.7419               |             |            |             |           |
| [14660]ENERGY: 9330000 | 3173.7436   | 5156.1148  | 5261.0987   |           |
| 332.0105               | -15771.8957 | -1804.5979 | 0.0000      | 0.0000    |
| 7697.8261              | 4044.3001   | 307.9515   | -3653.5259  | 4102.5583 |
| 307.1976               | -61.5825    | -105.7582  | 656151.2420 | -28.8876  |
| -28.9000               |             |            |             |           |
| [14696]ENERGY: 9340000 | 3266.8364   | 5065.3030  | 5233.4933   |           |
| 338.7395               | -15805.9487 | -1656.3572 | 0.0000      | 0.0000    |
| 7604.4472              | 4046.5135   | 304.2159   | -3557.9337  | 4104.3124 |
| 307.3202               | 134.2335    | 48.7409    | 656151.2420 | -23.7953  |
| -23.7995               |             |            |             |           |
| [14746]ENERGY: 9350000 | 3223.4962   | 5363.7535  | 5262.3643   |           |
| 320.3453               | -15921.4215 | -1778.0222 | 0.0000      | 0.0000    |
| 7573.0578              | 4043.5736   | 302.9602   | -3529.4842  | 4104.6488 |
| 307.2633               | -16.4571    | -69.8942   | 656151.2420 | -29.8342  |
| -29.8264               |             |            |             |           |
| [14782]ENERGY: 9360000 | 3174.4684   | 5201.3294  | 5222.2537   |           |
| 348.7227               | -15812.0501 | -1783.6320 | 0.0000      | 0.0000    |
| 7692.7553              | 4043.8475   | 307.7487   | -3648.9079  | 4104.0044 |
| 307.4042               | -37.5967    | -17.6076   | 656151.2420 | -27.4589  |
| -27.4594               |             |            |             |           |
| [14832]ENERGY: 9370000 | 3284.5646   | 5234.4727  | 5246.5982   |           |
| 331.9261               | -15889.5455 | -1777.3535 | 0.0000      | 0.0000    |
| 7614.9369              | 4045.5995   | 304.6355   | -3569.3374  | 4103.6809 |
| 307.4368               | -109.1555   | -174.3866  | 656151.2420 | -24.1759  |
| -24.1847               |             |            |             |           |
| [14868]ENERGY: 9380000 | 3175.9879   | 5220.3198  | 5267.5847   |           |
| 341.5041               | -15858.6311 | -1793.8417 | 0.0000      | 0.0000    |
| 7687.9772              | 4040.9010   | 307.5575   | -3647.0763  | 4104.2116 |
| 307.1968               | 31.0116     | -90.0704   | 656151.2420 | -21.2835  |
| -21.2783               |             |            |             |           |
| [14918]ENERGY: 9390000 | 3234.6530   | 5178.1374  | 5301.9250   |           |
| 333.2377               | -15937.2957 | -1718.5987 | 0.0000      | 0.0000    |
| 7649.5736              | 4041.6323   | 306.0212   | -3607.9413  | 4104.0009 |
| 307.2478               | 18.8459     | 7.9720     | 656151.2420 | -23.3368  |
| -23.3483               |             |            |             |           |
| [14957]ENERGY: 9400000 | 3201.7367   | 5149.2233  | 5279.2828   |           |
| 329.6999               | -15808.0539 | -1780.2221 | 0.0000      | 0.0000    |
| 7670.5322              | 4042.1987   | 306.8596   | -3628.3334  | 4104.4244 |
| 307.1197               | 24.0367     | -16.8199   | 656151.2420 | -27.5011  |
| -27.4774               |             |            |             |           |
| [15007]ENERGY: 9410000 | 3152.2569   | 5204.2599  | 5307.3527   |           |
| 362.8059               | -15861.7767 | -1762.5077 | 0.0000      | 0.0000    |
| 7640.8948              | 4043.2859   | 305.6740   | -3597.6089  | 4106.1281 |
| 307.2829               | 48.2216     | -55.7402   | 656151.2420 | -23.9745  |
| -23.9917               |             |            |             |           |
| [15043]ENERGY: 9420000 | 3185.7104   | 5207.5542  | 5225.7328   |           |
| 357.8745               | -15782.7983 | -1782.5610 | 0.0000      | 0.0000    |
| 7630.1849              | 4041.6975   | 305.2455   | -3588.4874  | 4105.9231 |
| 307.4289               | -183.6521   | -160.2266  | 656151.2420 | -19.9443  |
| -19.9361               |             |            |             |           |
| [15093]ENERGY: 9430000 | 3155.7166   | 5220.4595  | 5228.7960   |           |



## Supplementary Text 6

|                        |             |            |             |           |
|------------------------|-------------|------------|-------------|-----------|
| 331.5901               | -15804.1806 | -1747.5453 | 0.0000      | 0.0000    |
| 7657.7528              | 4042.5891   | 306.3484   | -3615.1638  | 4104.1163 |
| 307.3907               | 13.5255     | -37.3720   | 656151.2420 | -22.9442  |
| -22.9496               |             |            |             |           |
| [15129]ENERGY: 9440000 | 3201.3624   | 5165.1063  | 5260.4769   |           |
| 325.7451               | -15869.6495 | -1711.7360 | 0.0000      | 0.0000    |
| 7671.3032              | 4042.6084   | 306.8905   | -3628.6948  | 4105.8756 |
| 307.3548               | 61.2636     | 79.3421    | 656151.2420 | -21.9848  |
| -21.9638               |             |            |             |           |
| [15179]ENERGY: 9450000 | 3184.9239   | 5171.5693  | 5287.5545   |           |
| 333.1209               | -15747.9850 | -1775.9148 | 0.0000      | 0.0000    |
| 7588.0557              | 4041.3245   | 303.5602   | -3546.7312  | 4106.4926 |
| 307.3083               | -10.3787    | -14.7716   | 656151.2420 | -23.5370  |
| -23.5527               |             |            |             |           |
| [15215]ENERGY: 9460000 | 3266.9227   | 5203.3251  | 5292.4755   |           |
| 344.0366               | -15780.7249 | -1877.2384 | 0.0000      | 0.0000    |
| 7594.3865              | 4043.1829   | 303.8134   | -3551.2035  | 4107.1011 |
| 307.2437               | 23.4660     | -49.1305   | 656151.2420 | -27.6068  |
| -27.6217               |             |            |             |           |
| [15265]ENERGY: 9470000 | 3206.8709   | 5222.7926  | 5296.8044   |           |
| 325.4034               | -15812.6833 | -1761.3320 | 0.0000      | 0.0000    |
| 7572.4648              | 4050.3209   | 302.9365   | -3522.1440  | 4108.5124 |
| 307.2303               | -88.0880    | -145.0252  | 656151.2420 | -27.4965  |
| -27.4851               |             |            |             |           |
| [15301]ENERGY: 9480000 | 3180.9103   | 5203.3805  | 5247.8116   |           |
| 336.1562               | -15775.7084 | -1756.8319 | 0.0000      | 0.0000    |
| 7611.2643              | 4046.9826   | 304.4886   | -3564.2817  | 4108.5860 |
| 307.3829               | 148.1129    | 5.8185     | 656151.2420 | -24.1556  |
| -24.1594               |             |            |             |           |
| [15351]ENERGY: 9490000 | 3147.7805   | 5224.6617  | 5226.0808   |           |
| 336.4198               | -15785.9869 | -1750.3018 | 0.0000      | 0.0000    |
| 7646.7094              | 4045.3634   | 305.9066   | -3601.3459  | 4108.7355 |
| 307.2639               | 146.5833    | 108.7727   | 656151.2420 | -23.0975  |
| -23.0896               |             |            |             |           |
| [15390]ENERGY: 9500000 | 3186.3539   | 5159.3110  | 5270.9866   |           |
| 317.8148               | -15778.1511 | -1782.4535 | 0.0000      | 0.0000    |
| 7670.6189              | 4044.4805   | 306.8631   | -3626.1384  | 4108.4690 |
| 307.1939               | -41.2263    | -121.4950  | 656151.2420 | -27.9446  |
| -27.9471               |             |            |             |           |
| [15440]ENERGY: 9510000 | 3174.8025   | 5174.2318  | 5269.7414   |           |
| 329.8397               | -15814.7245 | -1817.0370 | 0.0000      | 0.0000    |
| 7726.2599              | 4043.1140   | 309.0890   | -3683.1459  | 4109.1033 |
| 307.1879               | -180.2073   | -154.0042  | 656151.2420 | -26.5908  |
| -26.5824               |             |            |             |           |
| [15476]ENERGY: 9520000 | 3128.9652   | 5127.8090  | 5210.0438   |           |
| 337.1095               | -15835.7197 | -1724.3317 | 0.0000      | 0.0000    |
| 7802.8675              | 4046.7436   | 312.1537   | -3756.1239  | 4109.1918 |
| 307.1778               | -96.8506    | -92.9114   | 656151.2420 | -22.5400  |
| -22.5351               |             |            |             |           |
| [15526]ENERGY: 9530000 | 3241.8046   | 5176.4110  | 5245.6584   |           |
| 340.6435               | -15830.2082 | -1771.4889 | 0.0000      | 0.0000    |
| 7648.1494              | 4050.9697   | 305.9642   | -3597.1797  | 4108.9584 |
| 307.3190               | 93.0131     | -41.8957   | 656151.2420 | -27.9594  |
| -27.9849               |             |            |             |           |

## Supplementary Text 6

|                        |             |            |             |           |
|------------------------|-------------|------------|-------------|-----------|
| [15562]ENERGY: 9540000 | 3105.1730   | 5194.8620  | 5269.5539   |           |
| 329.9582               | -15861.4939 | -1750.0383 | 0.0000      | 0.0000    |
| 7755.0019              | 4043.0168   | 310.2388   | -3711.9851  | 4110.0952 |
| 307.4395               | 74.1320     | -10.9172   | 656151.2420 | -22.7195  |
| -22.7134               |             |            |             |           |
| [15612]ENERGY: 9550000 | 3184.0000   | 5262.7688  | 5274.1090   |           |
| 341.7100               | -15891.9643 | -1778.1306 | 0.0000      | 0.0000    |
| 7656.1792              | 4048.6721   | 306.2854   | -3607.5071  | 4110.3742 |
| 307.3354               | 165.9094    | 101.1308   | 656151.2420 | -26.2157  |
| -26.2145               |             |            |             |           |
| [15648]ENERGY: 9560000 | 3226.1846   | 5197.7691  | 5247.9380   |           |
| 311.4181               | -15781.4286 | -1815.2035 | 0.0000      | 0.0000    |
| 7663.0205              | 4049.6982   | 306.5591   | -3613.3223  | 4110.5622 |
| 307.3274               | -70.4617    | -61.3823   | 656151.2420 | -27.3199  |
| -27.3063               |             |            |             |           |
| [15698]ENERGY: 9570000 | 3110.8235   | 5106.3849  | 5266.7011   |           |
| 362.6489               | -15818.2817 | -1720.4572 | 0.0000      | 0.0000    |
| 7735.6872              | 4043.5066   | 309.4662   | -3692.1806  | 4110.3223 |
| 307.4110               | -15.2103    | -39.7824   | 656151.2420 | -21.6079  |
| -21.6249               |             |            |             |           |
| [15734]ENERGY: 9580000 | 3157.2811   | 5128.3325  | 5266.9878   |           |
| 329.2495               | -15835.9550 | -1744.3568 | 0.0000      | 0.0000    |
| 7746.8708              | 4048.4099   | 309.9136   | -3698.4609  | 4110.2910 |
| 307.3471               | -65.6831    | -71.2022   | 656151.2420 | -26.0067  |
| -26.0029               |             |            |             |           |
| [15784]ENERGY: 9590000 | 3242.3127   | 5209.5096  | 5238.5392   |           |
| 307.7129               | -15901.8723 | -1734.6210 | 0.0000      | 0.0000    |
| 7687.9589              | 4049.5400   | 307.5568   | -3638.4189  | 4111.5117 |
| 307.3913               | -150.3588   | -111.8379  | 656151.2420 | -21.6643  |
| -21.6513               |             |            |             |           |
| [15823]ENERGY: 9600000 | 3209.8060   | 5154.5573  | 5241.4604   |           |
| 351.5507               | -15881.1183 | -1754.6255 | 0.0000      | 0.0000    |
| 7723.0062              | 4044.6369   | 308.9589   | -3678.3693  | 4110.5922 |
| 307.3730               | 26.7398     | -27.5500   | 656151.2420 | -26.8307  |
| -26.8418               |             |            |             |           |
| [15873]ENERGY: 9610000 | 3119.9500   | 5235.6348  | 5292.3526   |           |
| 348.2034               | -15862.1939 | -1771.0312 | 0.0000      | 0.0000    |
| 7688.4796              | 4051.3954   | 307.5776   | -3637.0842  | 4112.1202 |
| 307.2836               | 182.7790    | 81.5953    | 656151.2420 | -24.6758  |
| -24.6716               |             |            |             |           |
| [15909]ENERGY: 9620000 | 3141.3719   | 5265.9751  | 5271.1984   |           |
| 342.9549               | -15841.7519 | -1771.1891 | 0.0000      | 0.0000    |
| 7641.1515              | 4049.7109   | 305.6843   | -3591.4406  | 4113.6317 |
| 307.2517               | 53.0867     | 14.0913    | 656151.2420 | -27.7805  |
| -27.8007               |             |            |             |           |
| [15959]ENERGY: 9630000 | 3221.4503   | 5279.9487  | 5305.0883   |           |
| 351.8351               | -15837.2958 | -1822.9587 | 0.0000      | 0.0000    |
| 7554.6913              | 4052.7593   | 302.2254   | -3501.9320  | 4113.2413 |
| 307.2466               | 78.0547     | 24.8681    | 656151.2420 | -23.3563  |
| -23.3564               |             |            |             |           |
| [15995]ENERGY: 9640000 | 3211.1316   | 5220.5157  | 5241.6026   |           |
| 349.8406               | -15850.4044 | -1787.1908 | 0.0000      | 0.0000    |
| 7663.3837              | 4048.8789   | 306.5737   | -3614.5047  | 4112.3871 |
| 307.4053               | 13.4815     | -108.1070  | 656151.2420 | -22.5739  |

Supplementary Text 6

-22.5558  
 [16045]ENERGY: 9650000      3168.2539      5125.9042      5240.9691  
 333.6616      -15795.2414      -1700.3891      0.0000      0.0000  
 7678.7404      4051.8987      307.1880      -3626.8417      4112.7135  
 307.2486      -6.1081      -50.4110      656151.2420      -25.2436  
 -25.2459  
 [16081]ENERGY: 9660000      3220.3844      5099.6014      5280.1764  
 323.6019      -15824.8575      -1683.1689      0.0000      0.0000  
 7632.8536      4048.5912      305.3523      -3584.2624      4111.6213  
 307.3610      128.7573      119.3101      656151.2420      -23.6025  
 -23.6195  
 [16131]ENERGY: 9670000      3171.6122      5156.6406      5299.8251  
 374.1284      -15865.1282      -1737.7158      0.0000      0.0000  
 7653.2190      4052.5812      306.1670      -3600.6377      4113.6633  
 307.3678      213.4981      77.7212      656151.2420      -19.8624  
 -19.8491  
 [16167]ENERGY: 9680000      3148.6530      5214.6394      5271.0446  
 350.2150      -15859.0835      -1781.1305      0.0000      0.0000  
 7705.8012      4050.1391      308.2706      -3655.6620      4113.8736  
 307.5834      -39.8881      -53.6146      656151.2420      -21.6687  
 -21.6799  
 [16217]ENERGY: 9690000      3116.3576      5183.9882      5303.5175  
 316.4640      -15717.6246      -1802.2080      0.0000      0.0000  
 7650.0628      4050.5574      306.0408      -3599.5054      4112.4813  
 307.4708      51.9334      73.1126      656151.2420      -27.1877  
 -27.1688  
 [16256]ENERGY: 9700000      3160.2525      5148.4840      5255.6184  
 341.0392      -15857.4476      -1703.0525      0.0000      0.0000  
 7709.4604      4054.3545      308.4170      -3655.1059      4112.5845  
 307.5172      108.1881      95.7421      656151.2420      -23.2128  
 -23.2134  
 [16306]ENERGY: 9710000      3204.2086      5297.6188      5228.5547  
 346.6077      -15835.6750      -1813.1306      0.0000      0.0000  
 7625.5282      4053.7124      305.0593      -3571.8158      4112.9931  
 307.5759      -35.5325      11.9830      656151.2420      -21.4801  
 -21.4866  
 [16342]ENERGY: 9720000      3167.1665      5130.8754      5227.8617  
 346.9156      -15813.2822      -1722.1446      0.0000      0.0000  
 7714.6194      4052.0118      308.6233      -3662.6076      4112.9918  
 307.4782      33.4425      30.1130      656151.2420      -29.4901  
 -29.4976  
 [16392]ENERGY: 9730000      3141.6179      5109.7803      5257.4701  
 354.8548      -15702.6379      -1822.3268      0.0000      0.0000  
 7712.8232      4051.5815      308.5515      -3661.2416      4114.0225  
 307.5859      189.5789      99.6371      656151.2420      -21.7265  
 -21.7213  
 [16428]ENERGY: 9740000      3186.3353      5120.7301      5246.4273  
 330.6326      -15816.9442      -1735.4329      0.0000      0.0000  
 7722.5668      4054.3150      308.9413      -3668.2518      4114.8438  
 307.6060      19.2943      -41.4818      656151.2420      -26.7934  
 -26.8013  
 [16478]ENERGY: 9750000      3160.2676      5258.7842      5294.6872  
 346.0694      -15859.6938      -1803.8721      0.0000      0.0000  
 7654.7380      4050.9807      306.2278      -3603.7573      4114.6682

Supplementary Text 6

|                        |             |            |             |           |
|------------------------|-------------|------------|-------------|-----------|
| 307.5305               | -27.9932    | -36.1108   | 656151.2420 | -25.5704  |
| -25.5457               |             |            |             |           |
| [16514]ENERGY: 9760000 | 3207.0235   | 5141.9381  | 5220.4902   |           |
| 342.0417               | -15800.9120 | -1803.7885 | 0.0000      | 0.0000    |
| 7742.6247              | 4049.4176   | 309.7437   | -3693.2071  | 4113.7581 |
| 307.4415               | -28.1348    | -83.0945   | 656151.2420 | -25.8697  |
| -25.8915               |             |            |             |           |
| [16564]ENERGY: 9770000 | 3220.0890   | 5236.8340  | 5253.5917   |           |
| 336.0148               | -15868.4132 | -1787.5670 | 0.0000      | 0.0000    |
| 7663.0941              | 4053.6433   | 306.5621   | -3609.4507  | 4115.0231 |
| 307.4073               | 106.9431    | 9.5748     | 656151.2420 | -24.7456  |
| -24.7348               |             |            |             |           |
| [16600]ENERGY: 9780000 | 3216.5327   | 5237.9965  | 5270.7915   |           |
| 330.1334               | -15888.4407 | -1779.3515 | 0.0000      | 0.0000    |
| 7664.4112              | 4052.0732   | 306.6148   | -3612.3380  | 4114.1973 |
| 307.4019               | -172.0667   | -128.0887  | 656151.2420 | -24.7709  |
| -24.7560               |             |            |             |           |
| [16650]ENERGY: 9790000 | 3157.5652   | 5113.0449  | 5209.8112   |           |
| 332.2880               | -15753.4994 | -1706.9119 | 0.0000      | 0.0000    |
| 7704.8240              | 4057.1221   | 308.2315   | -3647.7019  | 4116.0938 |
| 307.3706               | 0.2243      | -16.0119   | 656151.2420 | -22.2508  |
| -22.2532               |             |            |             |           |
| [16689]ENERGY: 9800000 | 3231.2032   | 5226.2357  | 5230.2625   |           |
| 333.3148               | -15894.9814 | -1768.7117 | 0.0000      | 0.0000    |
| 7697.9441              | 4055.2673   | 307.9563   | -3642.6769  | 4116.3954 |
| 307.4637               | -62.4210    | -34.1015   | 656151.2420 | -22.2265  |
| -22.2190               |             |            |             |           |
| [16739]ENERGY: 9810000 | 3144.6281   | 5189.0960  | 5285.5401   |           |
| 348.1163               | -15850.0747 | -1787.4767 | 0.0000      | 0.0000    |
| 7722.4457              | 4052.2750   | 308.9364   | -3670.1707  | 4116.5884 |
| 307.6450               | 8.3681      | -30.9875   | 656151.2420 | -28.5102  |
| -28.5164               |             |            |             |           |
| [16775]ENERGY: 9820000 | 3204.4141   | 5172.8677  | 5196.5049   |           |
| 322.6151               | -15893.6015 | -1706.8285 | 0.0000      | 0.0000    |
| 7754.4315              | 4050.4034   | 310.2160   | -3704.0281  | 4116.9044 |
| 307.6043               | 82.3770     | 46.8862    | 656151.2420 | -26.7329  |
| -26.7509               |             |            |             |           |
| [16825]ENERGY: 9830000 | 3196.3925   | 5188.0652  | 5240.6001   |           |
| 344.4646               | -15880.9717 | -1741.8410 | 0.0000      | 0.0000    |
| 7706.3004              | 4053.0103   | 308.2905   | -3653.2901  | 4115.1979 |
| 307.6999               | -2.3125     | -50.9540   | 656151.2420 | -27.2506  |
| -27.2591               |             |            |             |           |
| [16861]ENERGY: 9840000 | 3195.1424   | 5212.7412  | 5207.3262   |           |
| 377.9181               | -15925.7736 | -1663.9434 | 0.0000      | 0.0000    |
| 7649.8674              | 4053.2784   | 306.0329   | -3596.5891  | 4115.9878 |
| 307.6871               | 177.9308    | 117.8959   | 656151.2420 | -23.7019  |
| -23.6846               |             |            |             |           |
| [16911]ENERGY: 9850000 | 3078.0942   | 5261.9323  | 5246.7659   |           |
| 330.9417               | -15890.1630 | -1734.5185 | 0.0000      | 0.0000    |
| 7761.3622              | 4054.4148   | 310.4933   | -3706.9474  | 4117.1670 |
| 307.6308               | 131.4057    | 14.4857    | 656151.2420 | -24.3741  |
| -24.3846               |             |            |             |           |
| [16947]ENERGY: 9860000 | 3154.3084   | 5271.7419  | 5273.2130   |           |
| 326.4961               | -15870.1802 | -1710.0822 | 0.0000      | 0.0000    |

## Supplementary Text 6

|                        |             |            |             |           |
|------------------------|-------------|------------|-------------|-----------|
| 7610.9212              | 4056.4181   | 304.4749   | -3554.5031  | 4117.4616 |
| 307.6229               | -47.6868    | 30.8313    | 656151.2420 | -23.2459  |
| -23.2138               |             |            |             |           |
| [16997]ENERGY: 9870000 | 3100.4245   | 5172.1216  | 5224.2912   |           |
| 345.0746               | -15772.1367 | -1765.2066 | 0.0000      | 0.0000    |
| 7751.0035              | 4055.5719   | 310.0789   | -3695.4315  | 4118.1424 |
| 307.5832               | 75.0779     | 38.7180    | 656151.2420 | -22.2727  |
| -22.2939               |             |            |             |           |
| [17033]ENERGY: 9880000 | 3199.3332   | 5139.4821  | 5267.5845   |           |
| 350.0614               | -15804.3155 | -1797.6482 | 0.0000      | 0.0000    |
| 7701.6924              | 4056.1900   | 308.1062   | -3645.5024  | 4118.5804 |
| 307.4578               | -49.6718    | -102.0145  | 656151.2420 | -26.3612  |
| -26.3727               |             |            |             |           |
| [17083]ENERGY: 9890000 | 3188.0215   | 5176.6425  | 5258.3861   |           |
| 320.7156               | -15760.9828 | -1839.4639 | 0.0000      | 0.0000    |
| 7712.2642              | 4055.5831   | 308.5291   | -3656.6810  | 4117.6580 |
| 307.5881               | -157.4314   | -182.5016  | 656151.2420 | -21.5772  |
| -21.5836               |             |            |             |           |
| [17122]ENERGY: 9900000 | 3276.7388   | 5108.8964  | 5266.0922   |           |
| 326.8157               | -15824.9571 | -1806.3913 | 0.0000      | 0.0000    |
| 7707.8967              | 4055.0915   | 308.3544   | -3652.8052  | 4117.8007 |
| 307.7030               | -191.3165   | -132.0599  | 656151.2420 | -21.9309  |
| -21.9090               |             |            |             |           |
| [17172]ENERGY: 9910000 | 3149.8317   | 5145.2749  | 5232.3633   |           |
| 335.3443               | -15740.8178 | -1818.3120 | 0.0000      | 0.0000    |
| 7753.3084              | 4056.9928   | 310.1711   | -3696.3156  | 4119.0953 |
| 307.7012               | 71.7270     | 6.4059     | 656151.2420 | -25.8193  |
| -25.8257               |             |            |             |           |
| [17208]ENERGY: 9920000 | 3152.4032   | 5233.9747  | 5262.4371   |           |
| 328.9889               | -15925.5787 | -1690.1893 | 0.0000      | 0.0000    |
| 7693.7171              | 4055.7530   | 307.7871   | -3637.9641  | 4117.8713 |
| 307.6467               | 13.7536     | 0.5949     | 656151.2420 | -19.4040  |
| -19.4040               |             |            |             |           |
| [17258]ENERGY: 9930000 | 3140.5184   | 5130.3374  | 5223.3311   |           |
| 312.3341               | -15793.8915 | -1748.4203 | 0.0000      | 0.0000    |
| 7790.3555              | 4054.5647   | 311.6532   | -3735.7908  | 4118.8875 |
| 307.5252               | 99.2271     | -21.9730   | 656151.2420 | -23.6523  |
| -23.6548               |             |            |             |           |
| [17294]ENERGY: 9940000 | 3195.4435   | 5143.4917  | 5240.9601   |           |
| 339.1508               | -15867.9290 | -1678.6737 | 0.0000      | 0.0000    |
| 7683.1064              | 4055.5499   | 307.3627   | -3627.5565  | 4116.6638 |
| 307.5530               | -62.4951    | -78.5949   | 656151.2420 | -20.3589  |
| -20.3519               |             |            |             |           |
| [17344]ENERGY: 9950000 | 3223.8142   | 5229.1517  | 5240.9718   |           |
| 325.9097               | -15922.3096 | -1761.8390 | 0.0000      | 0.0000    |
| 7716.9862              | 4052.6850   | 308.7180   | -3664.3012  | 4118.2114 |
| 307.6622               | -134.2431   | -83.3709   | 656151.2420 | -25.7360  |
| -25.7348               |             |            |             |           |
| [17380]ENERGY: 9960000 | 3113.2950   | 5133.5316  | 5240.7337   |           |
| 350.8057               | -15835.8403 | -1766.8535 | 0.0000      | 0.0000    |
| 7819.0500              | 4054.7223   | 312.8011   | -3764.3277  | 4119.4689 |
| 307.6409               | 22.0774     | -18.3296   | 656151.2420 | -27.6671  |
| -27.6699               |             |            |             |           |
| [17430]ENERGY: 9970000 | 3210.3764   | 5175.0767  | 5258.2912   |           |

## Supplementary Text 6

|                         |             |            |             |           |
|-------------------------|-------------|------------|-------------|-----------|
| 316.4888                | -15881.0982 | -1715.3994 | 0.0000      | 0.0000    |
| 7694.8233               | 4058.5588   | 307.8314   | -3636.2645  | 4120.2254 |
| 307.6475                | -45.5372    | -4.3619    | 656151.2420 | -23.0556  |
| -23.0664                |             |            |             |           |
| [17466]ENERGY: 9980000  | 3231.8586   | 5213.9711  | 5269.7176   |           |
| 342.1361                | -15883.1362 | -1770.3788 | 0.0000      | 0.0000    |
| 7655.4996               | 4059.6680   | 306.2583   | -3595.8317  | 4119.2848 |
| 307.6670                | 36.8323     | -15.3476   | 656151.2420 | -26.8453  |
| -26.8246                |             |            |             |           |
| [17516]ENERGY: 9990000  | 3224.0030   | 5231.9255  | 5295.8911   |           |
| 336.4382                | -15896.7335 | -1751.5379 | 0.0000      | 0.0000    |
| 7617.5689               | 4057.5554   | 304.7408   | -3560.0135  | 4120.0003 |
| 307.7555                | 112.3914    | 108.2396   | 656151.2420 | -25.7405  |
| -25.7616                |             |            |             |           |
| [17555]ENERGY: 10000000 | 3191.8929   | 5276.4509  | 5254.8585   |           |
| 354.9996                | -15860.7184 | -1742.8913 | 0.0000      | 0.0000    |
| 7586.2080               | 4060.8003   | 303.4862   | -3525.4077  | 4119.9890 |
| 307.8785                | -18.6017    | -66.4992   | 656151.2420 | -22.9161  |
| -22.9060                |             |            |             |           |
| [17605]ENERGY: 10010000 | 3202.5763   | 5167.6654  | 5306.5194   |           |
| 340.7576                | -15873.1110 | -1803.4756 | 0.0000      | 0.0000    |
| 7716.0426               | 4056.9747   | 308.6803   | -3659.0678  | 4121.0879 |
| 307.8486                | -39.6789    | -16.3668   | 656151.2420 | -25.8976  |
| -25.9039                |             |            |             |           |
| [17641]ENERGY: 10020000 | 3210.2396   | 5307.8570  | 5246.3895   |           |
| 352.9647                | -15909.0778 | -1810.2334 | 0.0000      | 0.0000    |
| 7660.6105               | 4058.7501   | 306.4627   | -3601.8603  | 4121.8488 |
| 307.7864                | -52.8575    | -72.3278   | 656151.2420 | -17.0779  |
| -17.0894                |             |            |             |           |
| [17691]ENERGY: 10030000 | 3189.4475   | 5251.9175  | 5269.0292   |           |
| 333.8925                | -15863.1572 | -1770.8805 | 0.0000      | 0.0000    |
| 7645.6325               | 4055.8816   | 305.8635   | -3589.7509  | 4121.7539 |
| 307.7613                | -98.2068    | -43.7708   | 656151.2420 | -25.8537  |
| -25.8333                |             |            |             |           |
| [17727]ENERGY: 10040000 | 3130.6883   | 5240.3082  | 5272.1235   |           |
| 350.0308                | -15801.0081 | -1813.3676 | 0.0000      | 0.0000    |
| 7684.3047               | 4063.0798   | 307.4106   | -3621.2249  | 4121.9184 |
| 307.7524                | 72.1766     | -84.8618   | 656151.2420 | -23.7128  |
| -23.7295                |             |            |             |           |
| [17777]ENERGY: 10050000 | 3140.1325   | 5122.1426  | 5282.3847   |           |
| 363.9907                | -15800.0738 | -1763.7226 | 0.0000      | 0.0000    |
| 7712.0760               | 4056.9301   | 308.5216   | -3655.1459  | 4121.5316 |
| 307.7905                | 54.6986     | 20.2201    | 656151.2420 | -24.3483  |
| -24.3322                |             |            |             |           |
| [17813]ENERGY: 10060000 | 3214.1060   | 5166.7295  | 5226.0235   |           |
| 329.3666                | -15815.0837 | -1738.5984 | 0.0000      | 0.0000    |
| 7676.4393               | 4058.9829   | 307.0960   | -3617.4564  | 4121.5970 |
| 307.6137                | -155.5575   | -72.5375   | 656151.2420 | -24.7071  |
| -24.7124                |             |            |             |           |
| [17863]ENERGY: 10070000 | 3147.2383   | 5175.6565  | 5252.3692   |           |
| 332.3472                | -15840.8234 | -1693.3124 | 0.0000      | 0.0000    |
| 7687.3470               | 4060.8225   | 307.5323   | -3626.5246  | 4122.5028 |
| 307.5038                | -10.6692    | 4.2499     | 656151.2420 | -25.2911  |
| -25.2903                |             |            |             |           |

## Supplementary Text 6

|                         |             |            |             |           |
|-------------------------|-------------|------------|-------------|-----------|
| [17899]ENERGY: 10080000 | 3158.1851   | 5147.7383  | 5256.5813   |           |
| 352.2093                | -15769.4613 | -1731.0376 | 0.0000      | 0.0000    |
| 7646.2346               | 4060.4496   | 305.8876   | -3585.7850  | 4122.1211 |
| 307.4243                | -5.2449     | -27.0369   | 656151.2420 | -24.9434  |
| -24.9513                |             |            |             |           |
| [17949]ENERGY: 10090000 | 3142.7959   | 5235.1005  | 5250.0095   |           |
| 341.1718                | -15847.5500 | -1747.6674 | 0.0000      | 0.0000    |
| 7686.6922               | 4060.5524   | 307.5061   | -3626.1398  | 4122.3920 |
| 307.5085                | -68.7637    | 0.7698     | 656151.2420 | -22.3282  |
| -22.3212                |             |            |             |           |
| [17988]ENERGY: 10100000 | 3213.8523   | 5245.1750  | 5270.1351   |           |
| 334.7973                | -15817.2297 | -1830.3765 | 0.0000      | 0.0000    |
| 7644.5028               | 4060.8562   | 305.8183   | -3583.6466  | 4122.3964 |
| 307.6630                | -85.9796    | -189.5952  | 656151.2420 | -26.6311  |
| -26.6405                |             |            |             |           |
| [18038]ENERGY: 10110000 | 3153.9377   | 5234.8861  | 5207.9762   |           |
| 331.2776                | -15788.9704 | -1794.9798 | 0.0000      | 0.0000    |
| 7712.0772               | 4056.2047   | 308.5216   | -3655.8726  | 4121.5489 |
| 307.8158                | -219.0328   | -206.6374  | 656151.2420 | -21.5969  |
| -21.5794                |             |            |             |           |
| [18074]ENERGY: 10120000 | 3181.3302   | 5235.6674  | 5241.3578   |           |
| 331.2491                | -15873.6929 | -1772.9297 | 0.0000      | 0.0000    |
| 7718.5668               | 4061.5488   | 308.7813   | -3657.0180  | 4122.7971 |
| 307.8062                | 9.6976      | 9.0641     | 656151.2420 | -23.9014  |
| -23.9053                |             |            |             |           |
| [18124]ENERGY: 10130000 | 3261.3872   | 5212.1885  | 5263.8463   |           |
| 326.7351                | -15852.3650 | -1812.0978 | 0.0000      | 0.0000    |
| 7661.8309               | 4061.5252   | 306.5115   | -3600.3057  | 4123.7973 |
| 307.8170                | 123.7105    | -22.3745   | 656151.2420 | -26.5238  |
| -26.5330                |             |            |             |           |
| [18160]ENERGY: 10140000 | 3178.5935   | 5258.2856  | 5216.3539   |           |
| 334.8202                | -15881.9933 | -1815.8050 | 0.0000      | 0.0000    |
| 7768.2049               | 4058.4598   | 310.7670   | -3709.7451  | 4122.8373 |
| 307.9047                | -39.4013    | -79.1354   | 656151.2420 | -23.4832  |
| -23.4839                |             |            |             |           |
| [18210]ENERGY: 10150000 | 3222.2922   | 5110.8560  | 5231.4071   |           |
| 331.0320                | -15771.3716 | -1771.9738 | 0.0000      | 0.0000    |
| 7706.9674               | 4059.2094   | 308.3172   | -3647.7581  | 4122.1359 |
| 307.9660                | 95.4625     | 60.7004    | 656151.2420 | -22.9328  |
| -22.9425                |             |            |             |           |
| [18246]ENERGY: 10160000 | 3278.8356   | 5085.2238  | 5220.6662   |           |
| 340.2750                | -15795.0871 | -1758.1920 | 0.0000      | 0.0000    |
| 7688.0551               | 4059.7767   | 307.5606   | -3628.2784  | 4122.0751 |
| 307.7997                | -172.6503   | -126.2570  | 656151.2420 | -22.3650  |
| -22.3590                |             |            |             |           |
| [18296]ENERGY: 10170000 | 3159.1903   | 5235.9105  | 5301.6549   |           |
| 371.1563                | -15800.8665 | -1823.5727 | 0.0000      | 0.0000    |
| 7616.7268               | 4060.1996   | 304.7072   | -3556.5272  | 4122.6086 |
| 307.7577                | -33.0513    | -63.5705   | 656151.2420 | -25.7879  |
| -25.7876                |             |            |             |           |
| [18332]ENERGY: 10180000 | 3252.1945   | 5249.4319  | 5247.2937   |           |
| 333.5080                | -15870.5895 | -1797.4788 | 0.0000      | 0.0000    |
| 7647.6030               | 4061.9627   | 305.9424   | -3585.6403  | 4123.2350 |
| 307.8968                | 82.5591     | -15.3561   | 656151.2420 | -22.0284  |

## Supplementary Text 6

-22.0315  
[18382]ENERGY: 10190000 3171.3571 5138.2726 5266.8518  
339.4701 -15799.2477 -1758.7718 0.0000 0.0000  
7700.2316 4058.1637 308.0478 -3642.0679 4122.2526  
307.8612 78.8675 43.9713 656151.2420 -24.1608  
-24.1508  
[18421]ENERGY: 10200000 3250.3769 5122.8222 5284.0787  
318.5914 -15905.5244 -1768.7073 0.0000 0.0000  
7762.4580 4064.0956 310.5371 -3698.3625 4122.0973  
307.9346 -1.4191 -36.6672 656151.2420 -25.7507  
-25.7443  
[18471]ENERGY: 10210000 3235.0544 5195.9782 5246.5719  
332.4744 -15848.6500 -1765.5911 0.0000 0.0000  
7665.7681 4061.6060 306.6691 -3604.1622 4122.2035  
307.8383 1.7175 37.9337 656151.2420 -24.1741  
-24.1712  
[18507]ENERGY: 10220000 3286.7176 5193.1824 5275.2610  
361.5878 -15900.6352 -1781.6294 0.0000 0.0000  
7630.0277 4064.5119 305.2393 -3565.5158 4122.5013  
307.6223 -105.7679 -176.6430 656151.2420 -25.1533  
-25.1825  
[18557]ENERGY: 10230000 3216.6587 5184.2336 5284.8936  
331.0518 -15875.2706 -1788.2218 0.0000 0.0000  
7703.7128 4057.0579 308.1870 -3646.6548 4121.9563  
307.6318 -83.1649 -46.3800 656151.2420 -25.6745  
-25.6476  
[18593]ENERGY: 10240000 3238.3715 5296.0658 5320.7734  
337.1615 -15860.7323 -1794.9831 0.0000 0.0000  
7527.0740 4063.7308 301.1206 -3463.3432 4122.2286  
307.8796 -61.8493 -49.0135 656151.2420 -24.9511  
-24.9647  
[18643]ENERGY: 10250000 3156.8823 5263.1322 5250.8429  
331.7856 -15860.8127 -1719.2397 0.0000 0.0000  
7641.2922 4063.8828 305.6899 -3577.4093 4123.8684  
307.7293 130.3588 47.8599 656151.2420 -25.7456  
-25.7475  
[18679]ENERGY: 10260000 3221.8811 5102.5484 5264.4243  
346.2357 -15853.7861 -1699.7490 0.0000 0.0000  
7679.0661 4060.6205 307.2010 -3618.4456 4123.3061  
307.8067 56.5282 -17.1070 656151.2420 -23.1659  
-23.1619  
[18729]ENERGY: 10270000 3220.2277 5191.7253 5240.3542  
356.1997 -15892.1922 -1788.7156 0.0000 0.0000  
7733.4195 4061.0184 309.3754 -3672.4011 4122.9777  
307.8575 69.7396 -8.3586 656151.2420 -25.5250  
-25.5286  
[18765]ENERGY: 10280000 3136.4877 5231.3462 5270.5623  
339.1778 -15805.5384 -1770.9517 0.0000 0.0000  
7660.1467 4061.2306 306.4442 -3598.9161 4125.0242  
307.7011 148.3817 26.8554 656151.2420 -24.5423  
-24.5322  
[18815]ENERGY: 10290000 3184.4277 5179.0193 5289.5518  
352.9945 -15862.0614 -1767.3794 0.0000 0.0000  
7684.0810 4060.6335 307.4017 -3623.4475 4123.3933



## Supplementary Text 6

|                         |             |            |             |           |
|-------------------------|-------------|------------|-------------|-----------|
| 307.5826                | 46.8654     | -52.9126   | 656151.2420 | -23.8567  |
| -23.8614                |             |            |             |           |
| [18854]ENERGY: 10300000 | 3291.7510   | 5167.5361  | 5305.7392   |           |
| 354.6112                | -15931.2767 | -1780.9055 | 0.0000      | 0.0000    |
| 7656.0518               | 4063.5072   | 306.2803   | -3592.5446  | 4121.8830 |
| 307.8208                | -103.9773   | -39.0806   | 656151.2420 | -25.6848  |
| -25.6707                |             |            |             |           |
| [18904]ENERGY: 10310000 | 3237.9019   | 5129.6497  | 5251.0154   |           |
| 358.1071                | -15809.6861 | -1796.1374 | 0.0000      | 0.0000    |
| 7687.2310               | 4058.0815   | 307.5277   | -3629.1495  | 4122.7235 |
| 307.9972                | -25.5361    | -41.5220   | 656151.2420 | -20.9717  |
| -20.9704                |             |            |             |           |
| [18940]ENERGY: 10320000 | 3140.5091   | 5275.4130  | 5243.7699   |           |
| 345.7247                | -15885.6916 | -1746.7999 | 0.0000      | 0.0000    |
| 7686.7277               | 4059.6528   | 307.5075   | -3627.0749  | 4123.0035 |
| 307.8214                | 62.4289     | 25.2730    | 656151.2420 | -20.0233  |
| -20.0277                |             |            |             |           |
| [18990]ENERGY: 10330000 | 3264.6834   | 5229.0354  | 5264.7384   |           |
| 333.3258                | -15857.2160 | -1761.1606 | 0.0000      | 0.0000    |
| 7586.9200               | 4060.3261   | 303.5147   | -3526.5938  | 4123.8744 |
| 307.7016                | 107.7800    | 58.8910    | 656151.2420 | -18.4133  |
| -18.4063                |             |            |             |           |
| [19026]ENERGY: 10340000 | 3171.8370   | 5181.0435  | 5264.2263   |           |
| 325.7107                | -15815.2593 | -1745.9677 | 0.0000      | 0.0000    |
| 7684.1429               | 4065.7335   | 307.4041   | -3618.4095  | 4123.0740 |
| 307.8070                | 19.9456     | -48.8470   | 656151.2420 | -22.1983  |
| -22.2076                |             |            |             |           |
| [19076]ENERGY: 10350000 | 3176.2456   | 5226.8464  | 5248.4727   |           |
| 342.1678                | -15793.1208 | -1771.8617 | 0.0000      | 0.0000    |
| 7638.1339               | 4066.8840   | 305.5635   | -3571.2499  | 4125.3551 |
| 307.8677                | -24.6811    | -84.1511   | 656151.2420 | -21.8172  |
| -21.8326                |             |            |             |           |
| [19112]ENERGY: 10360000 | 3253.4191   | 5209.8487  | 5222.7410   |           |
| 326.2965                | -15730.6003 | -1844.1354 | 0.0000      | 0.0000    |
| 7627.7309               | 4065.3005   | 305.1474   | -3562.4304  | 4124.5677 |
| 307.6969                | -154.3119   | -124.4305  | 656151.2420 | -23.3344  |
| -23.3025                |             |            |             |           |
| [19162]ENERGY: 10370000 | 3171.2125   | 5223.2944  | 5262.6706   |           |
| 357.5336                | -15858.6322 | -1739.7103 | 0.0000      | 0.0000    |
| 7645.2510               | 4061.6195   | 305.8483   | -3583.6314  | 4124.1457 |
| 307.6787                | 17.4179     | -20.8846   | 656151.2420 | -25.3446  |
| -25.3531                |             |            |             |           |
| [19198]ENERGY: 10380000 | 3207.4448   | 5173.9444  | 5238.5281   |           |
| 326.2599                | -15866.8601 | -1699.6557 | 0.0000      | 0.0000    |
| 7683.6619               | 4063.3234   | 307.3849   | -3620.3385  | 4124.3072 |
| 307.7848                | 8.6087      | 11.4899    | 656151.2420 | -23.0032  |
| -23.0260                |             |            |             |           |
| [19248]ENERGY: 10390000 | 3176.5162   | 5236.4382  | 5266.9054   |           |
| 334.9592                | -15906.2010 | -1765.0159 | 0.0000      | 0.0000    |
| 7719.1437               | 4062.7460   | 308.8043   | -3656.3978  | 4124.5660 |
| 307.9477                | -129.0155   | -158.6245  | 656151.2420 | -18.0646  |
| -18.0618                |             |            |             |           |
| [19287]ENERGY: 10400000 | 3154.6457   | 5213.3037  | 5231.7782   |           |
| 347.9662                | -15776.0650 | -1766.1476 | 0.0000      | 0.0000    |

## Supplementary Text 6

|                         |             |            |             |           |
|-------------------------|-------------|------------|-------------|-----------|
| 7657.6177               | 4063.0989   | 306.3430   | -3594.5188  | 4125.5993 |
| 307.9158                | 153.1213    | 76.8024    | 656151.2420 | -26.7706  |
| -26.7660                |             |            |             |           |
| [19337]ENERGY: 10410000 | 3151.4864   | 5174.9438  | 5280.0908   |           |
| 345.3004                | -15828.8529 | -1798.2952 | 0.0000      | 0.0000    |
| 7742.8789               | 4067.5523   | 309.7539   | -3675.3266  | 4126.8371 |
| 307.7427                | -49.0101    | 26.4417    | 656151.2420 | -25.6997  |
| -25.6968                |             |            |             |           |
| [19373]ENERGY: 10420000 | 3210.4361   | 5099.0105  | 5246.0235   |           |
| 348.7116                | -15841.3195 | -1728.3614 | 0.0000      | 0.0000    |
| 7729.4832               | 4063.9840   | 309.2180   | -3665.4992  | 4125.5127 |
| 307.8371                | -53.6776    | 30.3566    | 656151.2420 | -21.3467  |
| -21.3525                |             |            |             |           |
| [19423]ENERGY: 10430000 | 3181.9599   | 5097.2280  | 5314.7884   |           |
| 315.1867                | -15819.2032 | -1774.9149 | 0.0000      | 0.0000    |
| 7750.9059               | 4065.9507   | 310.0750   | -3684.9552  | 4126.4723 |
| 307.8736                | -75.5173    | -23.6268   | 656151.2420 | -21.6605  |
| -21.6562                |             |            |             |           |
| [19459]ENERGY: 10440000 | 3218.2165   | 5107.6383  | 5275.0206   |           |
| 351.7309                | -15749.7731 | -1828.9323 | 0.0000      | 0.0000    |
| 7689.5968               | 4063.4978   | 307.6223   | -3626.0991  | 4127.2864 |
| 307.8143                | -98.5629    | -123.0930  | 656151.2420 | -22.7605  |
| -22.7655                |             |            |             |           |
| [19509]ENERGY: 10450000 | 3151.7720   | 5165.8990  | 5259.2843   |           |
| 325.2786                | -15880.7317 | -1689.4738 | 0.0000      | 0.0000    |
| 7734.0779               | 4066.1063   | 309.4018   | -3667.9716  | 4127.0807 |
| 307.6128                | 131.8385    | 90.4671    | 656151.2420 | -24.6064  |
| -24.5833                |             |            |             |           |
| [19545]ENERGY: 10460000 | 3173.9149   | 5167.5785  | 5272.3748   |           |
| 344.8385                | -15791.2169 | -1767.5050 | 0.0000      | 0.0000    |
| 7666.2383               | 4066.2231   | 306.6879   | -3600.0152  | 4126.0533 |
| 307.6650                | 38.3868     | 42.0053    | 656151.2420 | -24.7416  |
| -24.7648                |             |            |             |           |
| [19595]ENERGY: 10470000 | 3087.2347   | 5188.4171  | 5307.2993   |           |
| 354.5143                | -15830.6573 | -1775.5698 | 0.0000      | 0.0000    |
| 7732.6980               | 4063.9364   | 309.3466   | -3668.7616  | 4126.5710 |
| 307.4773                | -22.5584    | 23.2966    | 656151.2420 | -21.4153  |
| -21.4157                |             |            |             |           |
| [19631]ENERGY: 10480000 | 3202.0616   | 5133.4715  | 5250.7710   |           |
| 349.3796                | -15861.7306 | -1724.0245 | 0.0000      | 0.0000    |
| 7714.7918               | 4064.7203   | 308.6302   | -3650.0715  | 4126.6446 |
| 307.6249                | 120.2244    | 145.4216   | 656151.2420 | -23.2760  |
| -23.2665                |             |            |             |           |
| [19681]ENERGY: 10490000 | 3181.2841   | 5176.7546  | 5294.6621   |           |
| 344.1289                | -15928.9856 | -1681.0916 | 0.0000      | 0.0000    |
| 7678.5680               | 4065.3205   | 307.1811   | -3613.2475  | 4126.6742 |
| 307.7450                | 26.0870     | 12.8486    | 656151.2420 | -26.7688  |
| -26.7614                |             |            |             |           |
| [19720]ENERGY: 10500000 | 3149.7109   | 5161.8840  | 5295.1630   |           |
| 331.8375                | -15743.4675 | -1779.6105 | 0.0000      | 0.0000    |
| 7650.7015               | 4066.2190   | 306.0663   | -3584.4825  | 4127.4832 |
| 307.7969                | -134.4189   | -122.2403  | 656151.2420 | -18.6078  |
| -18.6112                |             |            |             |           |
| [19770]ENERGY: 10510000 | 3220.6034   | 5161.9629  | 5293.8671   |           |

## Supplementary Text 6

|                         |             |            |             |           |
|-------------------------|-------------|------------|-------------|-----------|
| 337.2980                | -15801.9347 | -1834.8717 | 0.0000      | 0.0000    |
| 7688.7619               | 4065.6870   | 307.5889   | -3623.0749  | 4126.2590 |
| 307.6951                | -144.6896   | -128.3573  | 656151.2420 | -25.0176  |
| -25.0233                |             |            |             |           |
| [19806]ENERGY: 10520000 | 3155.0105   | 5203.4737  | 5263.2513   |           |
| 346.1566                | -15867.7301 | -1732.5473 | 0.0000      | 0.0000    |
| 7696.8006               | 4064.4153   | 307.9105   | -3632.3853  | 4125.6702 |
| 307.5602                | 107.4074    | 55.1159    | 656151.2420 | -25.0971  |
| -25.0984                |             |            |             |           |
| [19856]ENERGY: 10530000 | 3198.4446   | 5136.2003  | 5279.1692   |           |
| 347.3371                | -15772.0620 | -1796.2562 | 0.0000      | 0.0000    |
| 7671.5792               | 4064.4124   | 306.9015   | -3607.1668  | 4126.9878 |
| 307.5956                | -170.6580   | -103.6004  | 656151.2420 | -24.5453  |
| -24.5275                |             |            |             |           |
| [19892]ENERGY: 10540000 | 3201.9478   | 5207.5871  | 5268.5761   |           |
| 355.5242                | -15794.4861 | -1772.9115 | 0.0000      | 0.0000    |
| 7603.3876               | 4069.6252   | 304.1735   | -3533.7624  | 4127.4477 |
| 307.8679                | 82.8278     | 67.0686    | 656151.2420 | -26.3102  |
| -26.3188                |             |            |             |           |
| [19942]ENERGY: 10550000 | 3223.2711   | 5145.5153  | 5256.4552   |           |
| 334.1979                | -15835.5894 | -1741.4858 | 0.0000      | 0.0000    |
| 7680.2319               | 4062.5960   | 307.2477   | -3617.6359  | 4125.6045 |
| 307.5879                | -79.4550    | -46.3923   | 656151.2420 | -22.7896  |
| -22.7979                |             |            |             |           |
| [19978]ENERGY: 10560000 | 3177.4554   | 5174.3782  | 5248.0097   |           |
| 327.0419                | -15784.1261 | -1745.6042 | 0.0000      | 0.0000    |
| 7668.7777               | 4065.9327   | 306.7895   | -3602.8451  | 4126.9881 |
| 307.6170                | -109.8685   | -35.1442   | 656151.2420 | -25.9895  |
| -25.9926                |             |            |             |           |
| [20028]ENERGY: 10570000 | 3108.0241   | 5140.0005  | 5283.9856   |           |
| 368.5603                | -15760.1972 | -1811.7934 | 0.0000      | 0.0000    |
| 7736.2135               | 4064.7934   | 309.4872   | -3671.4201  | 4128.2670 |
| 307.6266                | -14.5429    | -90.4253   | 656151.2420 | -21.8682  |
| -21.8619                |             |            |             |           |
| [20064]ENERGY: 10580000 | 3221.4950   | 5204.3757  | 5283.1538   |           |
| 344.1876                | -15889.5649 | -1740.3949 | 0.0000      | 0.0000    |
| 7642.5867               | 4065.8388   | 305.7417   | -3576.7479  | 4126.1393 |
| 307.6958                | -259.6714   | -198.5235  | 656151.2420 | -23.3494  |
| -23.3596                |             |            |             |           |
| [20114]ENERGY: 10590000 | 3081.1502   | 5254.4318  | 5246.6622   |           |
| 346.2282                | -15914.2159 | -1654.3202 | 0.0000      | 0.0000    |
| 7706.3296               | 4066.2659   | 308.2917   | -3640.0638  | 4127.4523 |
| 307.4508                | -0.4022     | 57.2332    | 656151.2420 | -24.7756  |
| -24.7619                |             |            |             |           |
| [20153]ENERGY: 10600000 | 3214.7900   | 5202.9714  | 5257.0743   |           |
| 340.7408                | -15881.3503 | -1799.0260 | 0.0000      | 0.0000    |
| 7731.5527               | 4066.7529   | 309.3008   | -3664.7998  | 4127.8910 |
| 307.5403                | -78.3677    | -98.1773   | 656151.2420 | -20.2606  |
| -20.2597                |             |            |             |           |
| [20203]ENERGY: 10610000 | 3150.7387   | 5084.6961  | 5243.9764   |           |
| 331.6774                | -15673.2763 | -1810.9035 | 0.0000      | 0.0000    |
| 7737.7756               | 4064.6844   | 309.5497   | -3673.0912  | 4126.9213 |
| 307.4553                | 16.9135     | 10.1697    | 656151.2420 | -26.1162  |
| -26.1267                |             |            |             |           |

## Supplementary Text 6

|                         |             |            |             |           |
|-------------------------|-------------|------------|-------------|-----------|
| [20239]ENERGY: 10620000 | 3219.9922   | 5120.6876  | 5276.9906   |           |
| 359.4474                | -15859.1811 | -1712.5684 | 0.0000      | 0.0000    |
| 7659.0718               | 4064.4401   | 306.4012   | -3594.6317  | 4126.6289 |
| 307.4115                | 14.3995     | 1.1122     | 656151.2420 | -19.3758  |
| -19.3667                |             |            |             |           |
| [20289]ENERGY: 10630000 | 3180.3500   | 5139.9792  | 5300.2175   |           |
| 369.9172                | -15778.3391 | -1788.8382 | 0.0000      | 0.0000    |
| 7640.8424               | 4064.1290   | 305.6719   | -3576.7134  | 4127.0997 |
| 307.3602                | -34.8440    | -10.3262   | 656151.2420 | -27.4257  |
| -27.4409                |             |            |             |           |
| [20325]ENERGY: 10640000 | 3102.8697   | 5112.7947  | 5328.7670   |           |
| 356.1193                | -15837.3775 | -1770.3684 | 0.0000      | 0.0000    |
| 7772.1182               | 4064.9231   | 310.9236   | -3707.1951  | 4127.3835 |
| 307.3373                | 28.1735     | -3.2433    | 656151.2420 | -19.7480  |
| -19.7442                |             |            |             |           |
| [20375]ENERGY: 10650000 | 3179.2129   | 5198.0184  | 5238.0472   |           |
| 363.4413                | -15872.1768 | -1717.1274 | 0.0000      | 0.0000    |
| 7675.6448               | 4065.0603   | 307.0642   | -3610.5845  | 4126.4225 |
| 307.2611                | -24.6523    | -31.1741   | 656151.2420 | -23.4710  |
| -23.4602                |             |            |             |           |
| [20411]ENERGY: 10660000 | 3136.0595   | 5235.0891  | 5256.3467   |           |
| 345.2897                | -15720.9044 | -1811.5284 | 0.0000      | 0.0000    |
| 7626.6085               | 4066.9608   | 305.1025   | -3559.6478  | 4128.1198 |
| 307.4815                | -40.1502    | -55.6263   | 656151.2420 | -23.5679  |
| -23.5734                |             |            |             |           |
| [20461]ENERGY: 10670000 | 3158.8238   | 5162.5579  | 5244.2443   |           |
| 350.7784                | -15793.9515 | -1758.6159 | 0.0000      | 0.0000    |
| 7700.7988               | 4064.6359   | 308.0705   | -3636.1630  | 4128.5378 |
| 307.4600                | 101.8444    | -29.8903   | 656151.2420 | -22.4684  |
| -22.4557                |             |            |             |           |
| [20497]ENERGY: 10680000 | 3147.2542   | 5265.6742  | 5276.7244   |           |
| 339.4754                | -15822.2442 | -1813.5739 | 0.0000      | 0.0000    |
| 7672.6857               | 4065.9958   | 306.9458   | -3606.6900  | 4128.0919 |
| 307.5027                | 73.4658     | 9.4136     | 656151.2420 | -25.3037  |
| -25.3141                |             |            |             |           |
| [20547]ENERGY: 10690000 | 3217.2275   | 5124.9021  | 5291.5037   |           |
| 362.2890                | -15899.4123 | -1720.7698 | 0.0000      | 0.0000    |
| 7690.5033               | 4066.2435   | 307.6586   | -3624.2598  | 4128.6607 |
| 307.3674                | 86.6365     | -1.0069    | 656151.2420 | -22.9882  |
| -22.9926                |             |            |             |           |
| [20586]ENERGY: 10700000 | 3168.2666   | 5256.0715  | 5301.9430   |           |
| 344.6821                | -15952.7978 | -1743.4956 | 0.0000      | 0.0000    |
| 7690.7546               | 4065.4245   | 307.6686   | -3625.3301  | 4128.2978 |
| 307.4623                | 62.9939     | -12.4348   | 656151.2420 | -24.8880  |
| -24.9045                |             |            |             |           |
| [20636]ENERGY: 10710000 | 3189.4474   | 5163.2212  | 5305.5402   |           |
| 320.2294                | -15842.3977 | -1747.7802 | 0.0000      | 0.0000    |
| 7678.5284               | 4066.7887   | 307.1795   | -3611.7398  | 4127.5402 |
| 307.4788                | -40.9699    | -47.5228   | 656151.2420 | -22.8665  |
| -22.8377                |             |            |             |           |
| [20672]ENERGY: 10720000 | 3227.5335   | 5200.0648  | 5296.2930   |           |
| 334.7262                | -15788.3317 | -1866.2154 | 0.0000      | 0.0000    |
| 7662.3428               | 4066.4132   | 306.5320   | -3595.9297  | 4127.2127 |
| 307.4449                | -24.7428    | -127.5010  | 656151.2420 | -24.2862  |

Supplementary Text 6

-24.2905  
 [20722]ENERGY: 10730000      3247.1988      5165.0580      5216.0796  
 336.2441      -15855.5207      -1715.7208      0.0000      0.0000  
 7675.7828      4069.1217      307.0697      -3606.6611      4128.1516  
 307.3918      -8.4573      17.7859      656151.2420      -22.9414  
 -22.9436  
 [20758]ENERGY: 10740000      3225.6156      5168.4074      5275.1016  
 359.0034      -15807.6201      -1790.6659      0.0000      0.0000  
 7639.3493      4069.1913      305.6122      -3570.1580      4128.8929  
 307.6503      -24.3355      -37.4953      656151.2420      -26.4053  
 -26.4170  
 [20808]ENERGY: 10750000      3161.9341      5147.5206      5268.1802  
 320.3325      -15737.9612      -1791.4142      0.0000      0.0000  
 7700.0385      4068.6305      308.0400      -3631.4079      4128.6585  
 307.7491      -42.9842      -59.2547      656151.2420      -27.4051  
 -27.3986  
 [20844]ENERGY: 10760000      3187.1459      5234.6700      5208.0701  
 360.8515      -15815.0196      -1785.0646      0.0000      0.0000  
 7673.0526      4063.7058      306.9605      -3609.3468      4127.0851  
 307.7003      47.4585      27.1744      656151.2420      -22.0431  
 -22.0497  
 [20894]ENERGY: 10770000      3174.4428      5144.1748      5236.1464  
 349.2481      -15807.5729      -1808.6357      0.0000      0.0000  
 7776.7856      4064.5890      311.1103      -3712.1965      4126.6559  
 307.5219      45.9031      -25.9220      656151.2420      -26.0370  
 -26.0378  
 [20930]ENERGY: 10780000      3164.7309      5180.0045      5294.0043  
 341.2955      -15822.0053      -1733.8820      0.0000      0.0000  
 7641.7446      4065.8925      305.7080      -3575.8521      4127.1140  
 307.5731      49.8343      13.6988      656151.2420      -28.4161  
 -28.4039  
 [20980]ENERGY: 10790000      3257.2449      5241.1299      5247.6931  
 321.5932      -15841.1205      -1794.2606      0.0000      0.0000  
 7635.6790      4067.9591      305.4653      -3567.7199      4129.3078  
 307.5968      147.0855      94.9232      656151.2420      -22.9136  
 -22.9204  
 [21019]ENERGY: 10800000      3127.3262      5180.9705      5292.2707  
 335.8622      -15790.7778      -1802.1235      0.0000      0.0000  
 7720.5885      4064.1168      308.8621      -3656.4717      4128.2459  
 307.7743      -98.2921      -90.3319      656151.2420      -28.4353  
 -28.4088  
 [21069]ENERGY: 10810000      3188.3260      5155.0477      5298.9941  
 336.8085      -15809.7215      -1707.8368      0.0000      0.0000  
 7606.6731      4068.2911      304.3050      -3538.3820      4129.4817  
 307.6954      105.1750      100.4540      656151.2420      -19.4397  
 -19.4634  
 [21105]ENERGY: 10820000      3129.3868      5230.1403      5302.8978  
 344.5421      -15861.1153      -1734.8222      0.0000      0.0000  
 7653.5939      4064.6235      306.1820      -3588.9704      4127.6716  
 307.7954      -54.5686      63.6642      656151.2420      -23.8001  
 -23.7947  
 [21155]ENERGY: 10830000      3232.2363      5281.9081      5258.8240  
 334.0851      -15896.6726      -1739.7602      0.0000      0.0000  
 7598.3870      4069.0077      303.9735      -3529.3793      4129.6287

## Supplementary Text 6

|                         |             |            |             |           |
|-------------------------|-------------|------------|-------------|-----------|
| 307.5928                | -89.2549    | -67.0940   | 656151.2420 | -22.3589  |
| -22.3500                |             |            |             |           |
| [21191]ENERGY: 10840000 | 3169.4076   | 5132.6030  | 5290.0464   |           |
| 321.5373                | -15810.5368 | -1715.0702 | 0.0000      | 0.0000    |
| 7678.8098               | 4066.7971   | 307.1908   | -3612.0127  | 4129.5250 |
| 307.6242                | 30.1376     | 51.9993    | 656151.2420 | -23.1759  |
| -23.1935                |             |            |             |           |
| [21241]ENERGY: 10850000 | 3150.7897   | 5150.9006  | 5268.8704   |           |
| 355.9325                | -15767.3584 | -1834.5318 | 0.0000      | 0.0000    |
| 7742.9520               | 4067.5550   | 309.7568   | -3675.3970  | 4130.0000 |
| 307.5749                | 38.1511     | -42.7914   | 656151.2420 | -27.3819  |
| -27.3930                |             |            |             |           |
| [21277]ENERGY: 10860000 | 3264.4389   | 5172.1166  | 5269.2264   |           |
| 323.4496                | -15932.4469 | -1764.2123 | 0.0000      | 0.0000    |
| 7734.9778               | 4067.5502   | 309.4378   | -3667.4276  | 4129.2278 |
| 307.6960                | -31.6209    | 55.6852    | 656151.2420 | -23.7750  |
| -23.7478                |             |            |             |           |
| [21327]ENERGY: 10870000 | 3308.6574   | 5153.2306  | 5303.0664   |           |
| 339.2895                | -15932.6179 | -1777.8913 | 0.0000      | 0.0000    |
| 7674.0700               | 4067.8047   | 307.0012   | -3606.2652  | 4129.6675 |
| 307.7183                | -9.4260     | 0.5097     | 656151.2420 | -26.2151  |
| -26.2123                |             |            |             |           |
| [21363]ENERGY: 10880000 | 3232.0912   | 5201.3870  | 5248.6649   |           |
| 345.0622                | -15847.0921 | -1777.0778 | 0.0000      | 0.0000    |
| 7668.1320               | 4071.1673   | 306.7636   | -3596.9646  | 4130.4416 |
| 307.8236                | -36.9265    | -53.7617   | 656151.2420 | -26.9665  |
| -26.9940                |             |            |             |           |
| [21413]ENERGY: 10890000 | 3221.3445   | 5123.8634  | 5239.1554   |           |
| 345.0171                | -15895.5045 | -1728.2255 | 0.0000      | 0.0000    |
| 7760.6327               | 4066.2830   | 310.4641   | -3694.3497  | 4129.7932 |
| 307.8677                | 88.2335     | 81.3319    | 656151.2420 | -28.2992  |
| -28.2888                |             |            |             |           |
| [21452]ENERGY: 10900000 | 3234.6083   | 5238.2929  | 5260.8430   |           |
| 331.6604                | -15848.0886 | -1794.6075 | 0.0000      | 0.0000    |
| 7648.7530               | 4071.4615   | 305.9884   | -3577.2915  | 4129.7968 |
| 307.8005                | 28.7798     | -47.9031   | 656151.2420 | -24.8106  |
| -24.8142                |             |            |             |           |
| [21502]ENERGY: 10910000 | 3265.1857   | 5200.2824  | 5286.5719   |           |
| 355.2315                | -15800.9778 | -1845.3805 | 0.0000      | 0.0000    |
| 7610.5820               | 4071.4952   | 304.4613   | -3539.0868  | 4130.9729 |
| 307.7088                | 148.3516    | -4.3389    | 656151.2420 | -28.8458  |
| -28.8576                |             |            |             |           |
| [21538]ENERGY: 10920000 | 3171.7343   | 5175.7705  | 5323.9117   |           |
| 328.1079                | -15793.8269 | -1846.9024 | 0.0000      | 0.0000    |
| 7709.6815               | 4068.4766   | 308.4258   | -3641.2049  | 4131.1363 |
| 307.6207                | -9.5912     | -32.4367   | 656151.2420 | -23.4921  |
| -23.4817                |             |            |             |           |
| [21588]ENERGY: 10930000 | 3215.5749   | 5298.5402  | 5296.2238   |           |
| 342.5503                | -15910.2218 | -1813.9572 | 0.0000      | 0.0000    |
| 7642.2600               | 4070.9701   | 305.7286   | -3571.2899  | 4130.8252 |
| 307.6733                | -4.2589     | -78.3474   | 656151.2420 | -26.4524  |
| -26.4439                |             |            |             |           |
| [21624]ENERGY: 10940000 | 3209.6182   | 5166.4348  | 5316.8437   |           |
| 323.4727                | -15866.9158 | -1717.8423 | 0.0000      | 0.0000    |

## Supplementary Text 6

|                         |             |            |             |           |
|-------------------------|-------------|------------|-------------|-----------|
| 7639.3749               | 4070.9862   | 305.6132   | -3568.3887  | 4130.8754 |
| 307.7228                | 111.5525    | -27.2116   | 656151.2420 | -24.8760  |
| -24.8812                |             |            |             |           |
| [21674]ENERGY: 10950000 | 3310.8079   | 5242.6969  | 5273.9858   |           |
| 347.1047                | -15924.0371 | -1732.8290 | 0.0000      | 0.0000    |
| 7554.0101               | 4071.7393   | 302.1982   | -3482.2708  | 4132.2692 |
| 307.7736                | -10.6592    | -68.6816   | 656151.2420 | -24.1979  |
| -24.1924                |             |            |             |           |
| [21710]ENERGY: 10960000 | 3198.5226   | 5183.2267  | 5311.6383   |           |
| 354.0436                | -15922.7607 | -1718.6307 | 0.0000      | 0.0000    |
| 7664.4896               | 4070.5294   | 306.6179   | -3593.9602  | 4131.9352 |
| 307.8202                | 51.6314     | 71.2426    | 656151.2420 | -23.4685  |
| -23.4755                |             |            |             |           |
| [21760]ENERGY: 10970000 | 3159.3043   | 5211.3744  | 5302.5293   |           |
| 322.1139                | -15896.0243 | -1718.9761 | 0.0000      | 0.0000    |
| 7690.5329               | 4070.8542   | 307.6598   | -3619.6787  | 4132.8678 |
| 307.6604                | 45.6071     | 0.0854     | 656151.2420 | -24.7918  |
| -24.7946                |             |            |             |           |
| [21796]ENERGY: 10980000 | 3169.1733   | 5257.4095  | 5263.5238   |           |
| 354.6016                | -15955.9359 | -1692.4531 | 0.0000      | 0.0000    |
| 7671.5568               | 4067.8760   | 306.9006   | -3603.6808  | 4133.2201 |
| 307.5875                | 46.3435     | 32.4858    | 656151.2420 | -18.2445  |
| -18.2381                |             |            |             |           |
| [21846]ENERGY: 10990000 | 3238.4481   | 5126.7631  | 5226.5588   |           |
| 344.3792                | -15886.8806 | -1740.8183 | 0.0000      | 0.0000    |
| 7763.5333               | 4071.9837   | 310.5801   | -3691.5496  | 4133.7071 |
| 307.5568                | -175.2283   | -214.6176  | 656151.2420 | -28.1422  |
| -28.1420                |             |            |             |           |
| [21885]ENERGY: 11000000 | 3262.1916   | 5146.3962  | 5275.5321   |           |
| 359.5396                | -15871.7490 | -1794.9994 | 0.0000      | 0.0000    |
| 7696.8343               | 4073.7454   | 307.9119   | -3623.0889  | 4133.5861 |
| 307.4421                | -48.8558    | -23.9664   | 656151.2420 | -21.2862  |
| -21.2842                |             |            |             |           |
| [21935]ENERGY: 11010000 | 3211.0543   | 5204.6539  | 5242.3544   |           |
| 334.3357                | -15823.4336 | -1786.4451 | 0.0000      | 0.0000    |
| 7692.9415               | 4075.4611   | 307.7561   | -3617.4804  | 4134.6457 |
| 307.8484                | 59.5481     | 3.1199     | 656151.2420 | -23.9091  |
| -23.9055                |             |            |             |           |
| [21971]ENERGY: 11020000 | 3226.8785   | 5235.7671  | 5274.9180   |           |
| 345.3293                | -15800.7370 | -1803.7294 | 0.0000      | 0.0000    |
| 7596.7739               | 4075.2005   | 303.9089   | -3521.5734  | 4134.1742 |
| 307.6296                | -87.6964    | -84.8746   | 656151.2420 | -21.9212  |
| -21.9197                |             |            |             |           |
| [22021]ENERGY: 11030000 | 3185.7511   | 5139.8043  | 5274.9393   |           |
| 336.4499                | -15819.5668 | -1751.5175 | 0.0000      | 0.0000    |
| 7707.1746               | 4073.0348   | 308.3255   | -3634.1398  | 4132.4367 |
| 307.6775                | 67.9464     | 118.9223   | 656151.2420 | -25.2880  |
| -25.2857                |             |            |             |           |
| [22057]ENERGY: 11040000 | 3286.5332   | 5197.8957  | 5264.8033   |           |
| 339.3792                | -15803.9056 | -1820.5740 | 0.0000      | 0.0000    |
| 7611.0842               | 4075.2161   | 304.4814   | -3535.8681  | 4133.9785 |
| 307.8511                | -111.9577   | -76.0003   | 656151.2420 | -22.8963  |
| -22.8972                |             |            |             |           |
| [22107]ENERGY: 11050000 | 3189.9836   | 5221.5718  | 5322.2496   |           |

## Supplementary Text 6

|                         |             |            |             |           |
|-------------------------|-------------|------------|-------------|-----------|
| 329.2988                | -15956.3227 | -1777.8366 | 0.0000      | 0.0000    |
| 7736.5500               | 4065.4945   | 309.5007   | -3671.0555  | 4132.7285 |
| 307.8563                | -80.9997    | -69.9801   | 656151.2420 | -27.0602  |
| -27.0647                |             |            |             |           |
| [22143]ENERGY: 11060000 | 3172.1672   | 5135.1695  | 5299.6027   |           |
| 322.4682                | -15776.5012 | -1777.7524 | 0.0000      | 0.0000    |
| 7702.0852               | 4077.2391   | 308.1219   | -3624.8461  | 4133.6552 |
| 307.9836                | 202.3258    | 169.4202   | 656151.2420 | -23.9225  |
| -23.9314                |             |            |             |           |
| [22193]ENERGY: 11070000 | 3195.9244   | 5135.3282  | 5273.2179   |           |
| 345.5688                | -15802.3838 | -1743.1867 | 0.0000      | 0.0000    |
| 7664.7251               | 4069.1938   | 306.6273   | -3595.5313  | 4134.4014 |
| 307.8685                | -0.1346     | -61.1414   | 656151.2420 | -26.1794  |
| -26.1690                |             |            |             |           |
| [22229]ENERGY: 11080000 | 3272.2662   | 5182.2463  | 5280.7458   |           |
| 320.2498                | -15876.4197 | -1779.9805 | 0.0000      | 0.0000    |
| 7673.6366               | 4072.7446   | 306.9838   | -3600.8920  | 4134.3805 |
| 307.9434                | -126.2888   | -117.3282  | 656151.2420 | -28.5627  |
| -28.5544                |             |            |             |           |
| [22279]ENERGY: 11090000 | 3284.4719   | 5151.2613  | 5308.4704   |           |
| 342.8655                | -15857.2256 | -1832.4094 | 0.0000      | 0.0000    |
| 7672.2147               | 4069.6489   | 306.9269   | -3602.5658  | 4135.2319 |
| 307.8601                | -204.0990   | -189.4672  | 656151.2420 | -26.8550  |
| -26.8619                |             |            |             |           |
| [22318]ENERGY: 11100000 | 3159.6229   | 5265.5498  | 5285.3788   |           |
| 352.2665                | -15871.0689 | -1799.5983 | 0.0000      | 0.0000    |
| 7679.2515               | 4071.4023   | 307.2085   | -3607.8492  | 4133.4346 |
| 307.7946                | -4.7650     | -3.6154    | 656151.2420 | -30.0537  |
| -30.0702                |             |            |             |           |
| [22368]ENERGY: 11110000 | 3189.3656   | 5171.6103  | 5317.2942   |           |
| 344.4555                | -15940.4945 | -1750.7911 | 0.0000      | 0.0000    |
| 7741.6390               | 4073.0790   | 309.7043   | -3668.5600  | 4133.7374 |
| 307.7087                | 20.3074     | 20.1617    | 656151.2420 | -20.7438  |
| -20.7305                |             |            |             |           |
| [22404]ENERGY: 11120000 | 3199.2360   | 5161.5326  | 5253.6044   |           |
| 323.2912                | -15745.1194 | -1832.0698 | 0.0000      | 0.0000    |
| 7711.8496               | 4072.3246   | 308.5125   | -3639.5250  | 4135.4543 |
| 307.7602                | -65.0175    | -201.2351  | 656151.2420 | -26.6576  |
| -26.6804                |             |            |             |           |
| [22454]ENERGY: 11130000 | 3219.6392   | 5236.1011  | 5246.3882   |           |
| 361.5130                | -15864.6875 | -1754.3231 | 0.0000      | 0.0000    |
| 7629.0633               | 4073.6942   | 305.2007   | -3555.3691  | 4135.1649 |
| 307.6904                | -76.8331    | -54.7549   | 656151.2420 | -20.4516  |
| -20.4284                |             |            |             |           |
| [22490]ENERGY: 11140000 | 3222.8714   | 5234.2897  | 5255.5267   |           |
| 326.3410                | -15910.9296 | -1727.1120 | 0.0000      | 0.0000    |
| 7672.0297               | 4073.0168   | 306.9195   | -3599.0129  | 4135.9603 |
| 307.7957                | 86.9346     | 59.3156    | 656151.2420 | -20.8120  |
| -20.8124                |             |            |             |           |
| [22540]ENERGY: 11150000 | 3247.6959   | 5147.8752  | 5252.2023   |           |
| 343.5264                | -15840.6723 | -1743.8127 | 0.0000      | 0.0000    |
| 7667.1940               | 4074.0088   | 306.7261   | -3593.1852  | 4136.2512 |
| 307.8673                | 82.2694     | -4.7194    | 656151.2420 | -29.3168  |
| -29.3287                |             |            |             |           |



## Supplementary Text 6

|                         |             |            |             |
|-------------------------|-------------|------------|-------------|
| [22576]ENERGY: 11160000 | 3254.6947   | 5269.0938  | 5258.5154   |
| 337.5229                | -15861.2799 | -1845.8921 | 0.0000      |
| 7663.2512               | 4075.9059   | 306.5684   | -3587.3452  |
| 307.8953                | -116.1702   | -109.4698  | 656151.2420 |
| -22.5891                |             |            | -22.5923    |
| [22626]ENERGY: 11170000 | 3181.8864   | 5220.5653  | 5284.0284   |
| 342.2891                | -15809.0290 | -1815.5193 | 0.0000      |
| 7670.1124               | 4074.3334   | 306.8428   | -3595.7790  |
| 307.7710                | -109.4383   | -32.9111   | 656151.2420 |
| -26.0296                |             |            | -26.0397    |
| [22662]ENERGY: 11180000 | 3170.5117   | 5224.2910  | 5232.2518   |
| 327.4961                | -15770.2696 | -1739.7845 | 0.0000      |
| 7632.2971               | 4076.7937   | 305.3300   | -3555.5034  |
| 308.0473                | -36.1891    | 0.1391     | 656151.2420 |
| -20.1054                |             |            | -20.0995    |
| [22712]ENERGY: 11190000 | 3180.8564   | 5210.1371  | 5285.7210   |
| 351.8138                | -15833.9561 | -1775.7699 | 0.0000      |
| 7658.1373               | 4076.9395   | 306.3638   | -3581.1978  |
| 308.0429                | -82.2860    | -31.5428   | 656151.2420 |
| -27.1073                |             |            | -27.1095    |
| [22751]ENERGY: 11200000 | 3145.0410   | 5228.0376  | 5282.2636   |
| 335.9261                | -15839.4968 | -1757.9247 | 0.0000      |
| 7682.6813               | 4076.5282   | 307.3457   | -3606.1532  |
| 307.9507                | 30.3024     | 130.0741   | 656151.2420 |
| -25.0617                |             |            | -25.0723    |
| [22801]ENERGY: 11210000 | 3118.8663   | 5280.2008  | 5238.2873   |
| 337.5139                | -15822.9457 | -1800.9775 | 0.0000      |
| 7729.7103               | 4080.6554   | 309.2271   | -3649.0548  |
| 307.7300                | 67.8916     | -36.5265   | 656151.2420 |
| -27.0327                |             |            | -27.0252    |
| [22837]ENERGY: 11220000 | 3267.5934   | 5193.2199  | 5267.2634   |
| 316.8946                | -15857.6767 | -1708.1453 | 0.0000      |
| 7597.6777               | 4076.8269   | 303.9451   | -3520.8507  |
| 307.5976                | -29.4282    | -92.5932   | 656151.2420 |
| -27.0286                |             |            | -27.0210    |
| [22887]ENERGY: 11230000 | 3180.2557   | 5106.3074  | 5271.8785   |
| 332.4488                | -15852.1348 | -1765.7325 | 0.0000      |
| 7803.5623               | 4076.5855   | 312.1815   | -3726.9768  |
| 307.8076                | 86.8874     | 31.2726    | 656151.2420 |
| -22.3996                |             |            | -22.4099    |
| [22923]ENERGY: 11240000 | 3185.6892   | 5161.3936  | 5277.1663   |
| 324.0779                | -15803.1159 | -1723.4299 | 0.0000      |
| 7659.0729               | 4080.8540   | 306.4012   | -3578.2189  |
| 307.7998                | 49.9386     | -34.5068   | 656151.2420 |
| -25.3158                |             |            | -25.3063    |
| [22973]ENERGY: 11250000 | 3217.4998   | 5232.1812  | 5273.9401   |
| 353.7075                | -15844.6189 | -1775.4486 | 0.0000      |
| 7617.2265               | 4074.4875   | 304.7271   | -3542.7389  |
| 307.8992                | 51.1256     | 32.4451    | 656151.2420 |
| -24.0381                |             |            | -24.0349    |
| [23009]ENERGY: 11260000 | 3165.7830   | 5179.2782  | 5253.2866   |
| 332.6653                | -15798.5965 | -1758.5920 | 0.0000      |
| 7700.5270               | 4074.3516   | 308.0596   | -3626.1753  |
| 307.8442                | -80.5685    | -90.7908   | 656151.2420 |
|                         |             |            | -21.8555    |

Supplementary Text 6

-21.8350  
 [23059]ENERGY: 11270000      3243.0485      5267.1729      5270.7819  
 339.1510      -15844.8590      -1794.9759      0.0000      0.0000  
 7599.6057      4079.9252      304.0222      -3519.6806      4139.4960  
 307.7450      95.9843      48.6874      656151.2420      -27.4151  
 -27.4337  
 [23095]ENERGY: 11280000      3210.5982      5239.7355      5241.0688  
 370.8100      -15763.9715      -1805.9415      0.0000      0.0000  
 7584.6104      4076.9098      303.4223      -3507.7006      4138.7731  
 307.9650      -22.2843      -20.6881      656151.2420      -24.5566  
 -24.5588  
 [23145]ENERGY: 11290000      3184.2916      5159.3962      5289.3968  
 344.9374      -15897.7193      -1713.4314      0.0000      0.0000  
 7707.1765      4074.0479      308.3256      -3633.1286      4139.6783  
 308.1838      -83.7400      -57.7183      656151.2420      -29.8706  
 -29.8706  
 [23184]ENERGY: 11300000      3151.4603      5271.5158      5269.7581  
 327.8978      -15801.1107      -1845.7050      0.0000      0.0000  
 7707.2181      4081.0344      308.3273      -3626.1837      4140.5279  
 307.9978      -123.4670      -116.4210      656151.2420      -24.8398  
 -24.8292  
 [23234]ENERGY: 11310000      3175.8794      5279.1880      5234.4969  
 327.1517      -15877.6315      -1763.0960      0.0000      0.0000  
 7705.9278      4081.9163      308.2756      -3624.0115      4141.1684  
 308.2425      0.7336      -73.1447      656151.2420      -25.6633  
 -25.6711  
 [23270]ENERGY: 11320000      3146.1611      5180.1079      5267.3900  
 326.8541      -15789.3456      -1738.5108      0.0000      0.0000  
 7684.5423      4077.1989      307.4201      -3607.3434      4139.5277  
 308.2980      57.5930      77.6935      656151.2420      -24.9659  
 -24.9446  
 [23320]ENERGY: 11330000      3291.3135      5174.3878      5274.6092  
 345.2134      -15862.8305      -1800.5007      0.0000      0.0000  
 7654.9430      4077.1356      306.2360      -3577.8074      4138.0979  
 308.0319      -246.3700      -108.4303      656151.2420      -26.0068  
 -26.0057  
 [23356]ENERGY: 11340000      3235.7567      5183.4699      5252.4267  
 326.5862      -15841.9913      -1800.0188      0.0000      0.0000  
 7718.3731      4074.6024      308.7735      -3643.7706      4138.0578  
 308.0380      -167.3199      -169.4234      656151.2420      -27.4747  
 -27.5028  
 [23406]ENERGY: 11350000      3162.7186      5282.6974      5296.1119  
 344.4056      -15828.9470      -1821.3677      0.0000      0.0000  
 7642.0836      4077.7023      305.7216      -3564.3813      4138.5892  
 308.1192      -40.0848      -10.2962      656151.2420      -26.0784  
 -26.0728  
 [23442]ENERGY: 11360000      3202.3202      5258.0686      5226.7241  
 338.9505      -15779.2971      -1799.3268      0.0000      0.0000  
 7631.0718      4078.5113      305.2810      -3552.5605      4138.9777  
 308.1466      42.4611      46.8848      656151.2420      -27.3527  
 -27.3579  
 [23492]ENERGY: 11370000      3256.3542      5279.9381      5268.5540  
 343.8559      -15903.9013      -1794.0497      0.0000      0.0000  
 7625.9877      4076.7389      305.0776      -3549.2488      4139.1668

## Supplementary Text 6

|                         |             |            |             |           |
|-------------------------|-------------|------------|-------------|-----------|
| 308.2604                | -149.7369   | -61.0443   | 656151.2420 | -24.1332  |
| -24.1237                |             |            |             |           |
| [23528]ENERGY: 11380000 | 3209.2494   | 5225.4978  | 5279.8599   |           |
| 353.0406                | -15838.0978 | -1846.7890 | 0.0000      | 0.0000    |
| 7694.4824               | 4077.2433   | 307.8178   | -3617.2391  | 4139.7667 |
| 308.2184                | -44.7802    | -101.5593  | 656151.2420 | -28.5691  |
| -28.5670                |             |            |             |           |
| [23578]ENERGY: 11390000 | 3218.6942   | 5316.6261  | 5305.6361   |           |
| 349.9156                | -15887.9670 | -1850.8818 | 0.0000      | 0.0000    |
| 7625.6957               | 4077.7189   | 305.0660   | -3547.9768  | 4139.4195 |
| 308.0667                | -172.0576   | -93.7685   | 656151.2420 | -28.7281  |
| -28.7308                |             |            |             |           |
| [23617]ENERGY: 11400000 | 3165.5580   | 5238.6166  | 5303.4693   |           |
| 351.1527                | -15880.4288 | -1874.7132 | 0.0000      | 0.0000    |
| 7772.6094               | 4076.2639   | 310.9432   | -3696.3455  | 4140.8641 |
| 307.9109                | -45.9988    | -69.7391   | 656151.2420 | -22.5018  |
| -22.5021                |             |            |             |           |
| [23667]ENERGY: 11410000 | 3109.4808   | 5264.7515  | 5281.4604   |           |
| 332.7777                | -15804.8273 | -1857.2566 | 0.0000      | 0.0000    |
| 7750.2186               | 4076.6050   | 310.0475   | -3673.6136  | 4141.2340 |
| 307.9701                | 62.7239     | -33.9954   | 656151.2420 | -23.1580  |
| -23.1680                |             |            |             |           |
| [23703]ENERGY: 11420000 | 3171.2298   | 5263.6366  | 5253.6171   |           |
| 333.5565                | -15843.3542 | -1786.1095 | 0.0000      | 0.0000    |
| 7684.8108               | 4077.3871   | 307.4309   | -3607.4237  | 4139.7576 |
| 307.8202                | -44.8253    | -47.8078   | 656151.2420 | -21.5272  |
| -21.5156                |             |            |             |           |
| [23753]ENERGY: 11430000 | 3212.1197   | 5232.3789  | 5285.0560   |           |
| 343.9109                | -15827.5377 | -1813.2299 | 0.0000      | 0.0000    |
| 7648.5321               | 4081.2300   | 305.9795   | -3567.3021  | 4140.2106 |
| 307.7669                | -222.1261   | -237.4975  | 656151.2420 | -24.7036  |
| -24.6999                |             |            |             |           |
| [23789]ENERGY: 11440000 | 3162.6228   | 5237.0857  | 5283.7364   |           |
| 349.5855                | -15809.4320 | -1812.4380 | 0.0000      | 0.0000    |
| 7667.7186               | 4078.8790   | 306.7471   | -3588.8395  | 4140.8954 |
| 307.8011                | 60.7124     | -21.9834   | 656151.2420 | -26.1228  |
| -26.1228                |             |            |             |           |
| [23839]ENERGY: 11450000 | 3178.1919   | 5174.3868  | 5214.9488   |           |
| 370.1628                | -15893.2824 | -1671.0494 | 0.0000      | 0.0000    |
| 7706.4514               | 4079.8098   | 308.2966   | -3626.6415  | 4141.6841 |
| 307.8519                | 179.0456    | 104.7238   | 656151.2420 | -16.1834  |
| -16.2020                |             |            |             |           |
| [23875]ENERGY: 11460000 | 3226.6332   | 5242.1252  | 5227.7103   |           |
| 328.7175                | -15888.1436 | -1723.1450 | 0.0000      | 0.0000    |
| 7665.3062               | 4079.2037   | 306.6506   | -3586.1024  | 4141.3383 |
| 307.8255                | -110.7852   | -1.5619    | 656151.2420 | -28.3253  |
| -28.3003                |             |            |             |           |
| [23925]ENERGY: 11470000 | 3263.6364   | 5196.5157  | 5238.8751   |           |
| 338.5953                | -15801.6533 | -1749.2433 | 0.0000      | 0.0000    |
| 7597.9201               | 4084.6461   | 303.9548   | -3513.2741  | 4141.6540 |
| 307.8256                | -19.0569    | -45.6568   | 656151.2420 | -24.5768  |
| -24.5731                |             |            |             |           |
| [23961]ENERGY: 11480000 | 3242.1821   | 5204.9442  | 5316.7495   |           |
| 340.4319                | -15858.6487 | -1787.4158 | 0.0000      | 0.0000    |

## Supplementary Text 6

|                         |             |            |             |           |
|-------------------------|-------------|------------|-------------|-----------|
| 7623.4259               | 4081.6691   | 304.9752   | -3541.7569  | 4143.5295 |
| 307.7180                | 126.0914    | -38.8148   | 656151.2420 | -26.8176  |
| -26.8421                |             |            |             |           |
| [24011]ENERGY: 11490000 | 3178.5040   | 5200.6343  | 5240.4112   |           |
| 344.4561                | -15807.6522 | -1765.6499 | 0.0000      | 0.0000    |
| 7689.3922               | 4080.0959   | 307.6141   | -3609.2963  | 4141.4463 |
| 307.8881                | 16.5123     | 24.2047    | 656151.2420 | -24.5241  |
| -24.5019                |             |            |             |           |
| [24050]ENERGY: 11500000 | 3123.3919   | 5207.2772  | 5245.8880   |           |
| 346.2330                | -15735.0210 | -1746.2763 | 0.0000      | 0.0000    |
| 7639.8367               | 4081.3295   | 305.6317   | -3558.5072  | 4141.5826 |
| 307.9003                | 33.5975     | -14.9142   | 656151.2420 | -22.1167  |
| -22.1307                |             |            |             |           |
| [24100]ENERGY: 11510000 | 3168.0506   | 5155.9934  | 5248.8549   |           |
| 343.6874                | -15805.2676 | -1763.5556 | 0.0000      | 0.0000    |
| 7731.2593               | 4079.0224   | 309.2890   | -3652.2370  | 4141.7331 |
| 307.9171                | 93.1377     | 64.5061    | 656151.2420 | -24.5893  |
| -24.5712                |             |            |             |           |
| [24136]ENERGY: 11520000 | 3148.1407   | 5228.7045  | 5259.0336   |           |
| 363.2282                | -15896.8480 | -1758.5436 | 0.0000      | 0.0000    |
| 7736.4667               | 4080.1822   | 309.4973   | -3656.2845  | 4141.0122 |
| 308.0072                | 35.0312     | 58.9985    | 656151.2420 | -25.6108  |
| -25.6178                |             |            |             |           |
| [24186]ENERGY: 11530000 | 3216.3167   | 5292.9932  | 5273.1707   |           |
| 344.6645                | -15860.0609 | -1767.4864 | 0.0000      | 0.0000    |
| 7583.0966               | 4082.6943   | 303.3618   | -3500.4024  | 4141.6191 |
| 308.0243                | 51.4136     | -20.0234   | 656151.2420 | -26.0877  |
| -26.1006                |             |            |             |           |
| [24222]ENERGY: 11540000 | 3165.1311   | 5188.2715  | 5292.9524   |           |
| 342.9772                | -15773.3049 | -1850.3703 | 0.0000      | 0.0000    |
| 7713.4210               | 4079.0779   | 308.5754   | -3634.3431  | 4140.8762 |
| 307.8487                | -56.9454    | -91.5009   | 656151.2420 | -24.5382  |
| -24.5249                |             |            |             |           |
| [24272]ENERGY: 11550000 | 3188.9564   | 5261.6610  | 5272.5152   |           |
| 331.2818                | -15812.2930 | -1836.7811 | 0.0000      | 0.0000    |
| 7674.2425               | 4079.5829   | 307.0081   | -3594.6596  | 4141.3952 |
| 307.8482                | 74.1018     | 66.2775    | 656151.2420 | -24.6442  |
| -24.6578                |             |            |             |           |
| [24308]ENERGY: 11560000 | 3213.6836   | 5219.4322  | 5271.5866   |           |
| 360.7655                | -15869.9291 | -1744.4798 | 0.0000      | 0.0000    |
| 7628.4593               | 4079.5182   | 305.1765   | -3548.9411  | 4141.6001 |
| 307.9611                | -83.7669    | -20.4132   | 656151.2420 | -24.8697  |
| -24.8498                |             |            |             |           |
| [24358]ENERGY: 11570000 | 3157.6088   | 5203.5388  | 5221.4097   |           |
| 343.0329                | -15845.0606 | -1754.2472 | 0.0000      | 0.0000    |
| 7750.5312               | 4076.8135   | 310.0600   | -3673.7177  | 4140.7204 |
| 307.9448                | 144.1046    | 87.1401    | 656151.2420 | -24.9811  |
| -24.9955                |             |            |             |           |
| [24394]ENERGY: 11580000 | 3242.4453   | 5218.1735  | 5277.1974   |           |
| 354.3657                | -15894.7024 | -1776.1847 | 0.0000      | 0.0000    |
| 7659.1170               | 4080.4118   | 306.4030   | -3578.7052  | 4141.1310 |
| 307.9605                | -88.0255    | -75.8471   | 656151.2420 | -24.9783  |
| -24.9774                |             |            |             |           |
| [24444]ENERGY: 11590000 | 3111.0570   | 5226.4339  | 5290.8468   |           |

## Supplementary Text 6

|                         |             |            |             |           |
|-------------------------|-------------|------------|-------------|-----------|
| 345.7483                | -15744.5118 | -1815.7271 | 0.0000      | 0.0000    |
| 7667.4311               | 4081.2782   | 306.7356   | -3586.1529  | 4141.9151 |
| 307.9570                | 56.3844     | 53.4441    | 656151.2420 | -26.8207  |
| -26.8197                |             |            |             |           |
| [24483]ENERGY: 11600000 | 3200.9979   | 5171.5769  | 5225.8123   |           |
| 317.3623                | -15794.5908 | -1718.1460 | 0.0000      | 0.0000    |
| 7675.5070               | 4078.5198   | 307.0587   | -3596.9872  | 4141.7982 |
| 307.9676                | 43.8231     | 20.3684    | 656151.2420 | -24.4074  |
| -24.4132                |             |            |             |           |
| [24533]ENERGY: 11610000 | 3186.2026   | 5177.9263  | 5293.2451   |           |
| 333.3954                | -15854.5395 | -1749.5931 | 0.0000      | 0.0000    |
| 7692.9478               | 4079.5845   | 307.7564   | -3613.3633  | 4142.0449 |
| 307.8022                | -40.7585    | -126.5359  | 656151.2420 | -23.8786  |
| -23.8691                |             |            |             |           |
| [24569]ENERGY: 11620000 | 3251.6024   | 5106.2740  | 5256.1840   |           |
| 317.7387                | -15834.4756 | -1799.0648 | 0.0000      | 0.0000    |
| 7780.3395               | 4078.5981   | 311.2525   | -3701.7414  | 4142.2603 |
| 307.9244                | -2.6920     | -93.6222   | 656151.2420 | -27.4554  |
| -27.4719                |             |            |             |           |
| [24619]ENERGY: 11630000 | 3199.7531   | 5234.2361  | 5229.0247   |           |
| 328.4016                | -15850.4882 | -1747.2444 | 0.0000      | 0.0000    |
| 7685.3312               | 4079.0142   | 307.4517   | -3606.3170  | 4142.1368 |
| 307.8692                | 76.8598     | 48.6574    | 656151.2420 | -23.7886  |
| -23.7664                |             |            |             |           |
| [24655]ENERGY: 11640000 | 3227.2825   | 5242.3378  | 5230.6034   |           |
| 319.3787                | -15888.7026 | -1826.2195 | 0.0000      | 0.0000    |
| 7771.4032               | 4076.0834   | 310.8950   | -3695.3198  | 4142.8922 |
| 307.8684                | 1.8874      | -29.1743   | 656151.2420 | -23.4490  |
| -23.4537                |             |            |             |           |
| [24705]ENERGY: 11650000 | 3143.0700   | 5224.2324  | 5296.2695   |           |
| 354.4682                | -15884.0909 | -1794.0826 | 0.0000      | 0.0000    |
| 7742.6655               | 4082.5321   | 309.7453   | -3660.1333  | 4142.8818 |
| 308.0719                | 89.1597     | 34.0005    | 656151.2420 | -22.9447  |
| -22.9474                |             |            |             |           |
| [24741]ENERGY: 11660000 | 3224.8489   | 5183.0809  | 5307.8381   |           |
| 337.3809                | -15852.1403 | -1758.5688 | 0.0000      | 0.0000    |
| 7640.5201               | 4082.9597   | 305.6590   | -3557.5604  | 4143.8628 |
| 307.8539                | -1.3318     | -67.8213   | 656151.2420 | -24.3126  |
| -24.3178                |             |            |             |           |
| [24791]ENERGY: 11670000 | 3208.7005   | 5229.9563  | 5281.4247   |           |
| 349.2305                | -15806.2981 | -1799.6580 | 0.0000      | 0.0000    |
| 7620.3817               | 4083.7376   | 304.8534   | -3536.6441  | 4143.9731 |
| 307.7099                | 19.2233     | 23.0684    | 656151.2420 | -25.7256  |
| -25.7194                |             |            |             |           |
| [24827]ENERGY: 11680000 | 3175.6684   | 5044.4435  | 5238.5172   |           |
| 338.1867                | -15729.1063 | -1802.3650 | 0.0000      | 0.0000    |
| 7815.9639               | 4081.3082   | 312.6776   | -3734.6556  | 4143.8959 |
| 307.7310                | -50.4629    | -39.4315   | 656151.2420 | -23.1479  |
| -23.1507                |             |            |             |           |
| [24877]ENERGY: 11690000 | 3230.3094   | 5205.0666  | 5291.3897   |           |
| 343.7616                | -15842.7724 | -1778.5048 | 0.0000      | 0.0000    |
| 7635.8064               | 4085.0565   | 305.4704   | -3550.7499  | 4143.9041 |
| 307.7943                | -72.5914    | -22.9178   | 656151.2420 | -25.8384  |
| -25.8390                |             |            |             |           |

## Supplementary Text 6

|                         |             |            |             |           |
|-------------------------|-------------|------------|-------------|-----------|
| [24916]ENERGY: 11700000 | 3153.1389   | 5175.9587  | 5292.9922   |           |
| 343.4171                | -15885.4472 | -1705.7297 | 0.0000      | 0.0000    |
| 7711.0866               | 4085.4166   | 308.4820   | -3625.6700  | 4143.3701 |
| 307.8544                | 129.9522    | 138.1965   | 656151.2420 | -20.3797  |
| -20.3752                |             |            |             |           |
| [24966]ENERGY: 11710000 | 3226.3210   | 5166.6762  | 5251.0162   |           |
| 343.5222                | -15761.8427 | -1761.0296 | 0.0000      | 0.0000    |
| 7619.7683               | 4084.4316   | 304.8288   | -3535.3367  | 4142.8602 |
| 307.7949                | 189.8609    | 95.9499    | 656151.2420 | -26.1296  |
| -26.1735                |             |            |             |           |
| [25002]ENERGY: 11720000 | 3201.8863   | 5181.7839  | 5284.5665   |           |
| 332.9894                | -15901.9931 | -1731.1090 | 0.0000      | 0.0000    |
| 7710.9575               | 4079.0815   | 308.4769   | -3631.8760  | 4142.5503 |
| 307.7421                | 127.5856    | 130.7401   | 656151.2420 | -20.2982  |
| -20.2693                |             |            |             |           |
| [25052]ENERGY: 11730000 | 3183.5838   | 5168.5583  | 5256.4485   |           |
| 333.8906                | -15812.4695 | -1776.9974 | 0.0000      | 0.0000    |
| 7730.0094               | 4083.0237   | 309.2390   | -3646.9858  | 4144.1211 |
| 307.8704                | 147.1514    | 103.3716   | 656151.2420 | -24.5160  |
| -24.5295                |             |            |             |           |
| [25088]ENERGY: 11740000 | 3179.7040   | 5278.5991  | 5254.4874   |           |
| 340.1176                | -15836.9837 | -1769.9111 | 0.0000      | 0.0000    |
| 7635.3582               | 4081.3715   | 305.4525   | -3553.9868  | 4143.6698 |
| 307.9899                | -91.2971    | -23.6962   | 656151.2420 | -22.1623  |
| -22.1332                |             |            |             |           |
| [25138]ENERGY: 11750000 | 3217.7422   | 5266.2238  | 5250.6183   |           |
| 353.2443                | -15837.8185 | -1862.9511 | 0.0000      | 0.0000    |
| 7695.0615               | 4082.1206   | 307.8409   | -3612.9409  | 4144.7819 |
| 307.8407                | -68.0857    | -64.0503   | 656151.2420 | -22.5355  |
| -22.5635                |             |            |             |           |
| [25174]ENERGY: 11760000 | 3145.8593   | 5178.0226  | 5248.9236   |           |
| 312.8174                | -15790.9132 | -1860.5540 | 0.0000      | 0.0000    |
| 7846.0394               | 4080.1952   | 313.8808   | -3765.8442  | 4144.2650 |
| 307.8881                | -57.6530    | -24.7499   | 656151.2420 | -25.5078  |
| -25.4813                |             |            |             |           |
| [25224]ENERGY: 11770000 | 3264.8644   | 5191.9439  | 5234.2782   |           |
| 353.9419                | -15821.6107 | -1780.6240 | 0.0000      | 0.0000    |
| 7642.6227               | 4085.4163   | 305.7431   | -3557.2064  | 4145.6483 |
| 307.5537                | -15.0427    | -64.7999   | 656151.2420 | -20.6465  |
| -20.6622                |             |            |             |           |
| [25260]ENERGY: 11780000 | 3171.8810   | 5311.1021  | 5296.3246   |           |
| 324.1614                | -15813.2734 | -1794.3313 | 0.0000      | 0.0000    |
| 7587.3322               | 4083.1966   | 303.5312   | -3504.1355  | 4144.6304 |
| 307.7511                | -80.1867    | -32.6907   | 656151.2420 | -26.2392  |
| -26.2315                |             |            |             |           |
| [25310]ENERGY: 11790000 | 3225.7684   | 5302.6520  | 5249.9515   |           |
| 324.0966                | -15871.5312 | -1784.4834 | 0.0000      | 0.0000    |
| 7641.0490               | 4087.5029   | 305.6802   | -3553.5461  | 4144.6201 |
| 307.8459                | 28.1711     | 22.0889    | 656151.2420 | -22.9879  |
| -22.9885                |             |            |             |           |
| [25349]ENERGY: 11800000 | 3246.7809   | 5230.2899  | 5253.4181   |           |
| 311.2479                | -15836.8631 | -1826.0408 | 0.0000      | 0.0000    |
| 7702.3333               | 4081.1661   | 308.1318   | -3621.1672  | 4145.4546 |
| 307.9089                | 25.2419     | -93.6489   | 656151.2420 | -25.1523  |

## Supplementary Text 6

-25.1464  
[25399]ENERGY: 11810000      3261.0959      5178.5572      5263.4098  
328.9226      -15903.3558      -1734.5895      0.0000      0.0000  
7690.2517      4084.2919      307.6485      -3605.9598      4144.6417  
308.0434      -118.7903      -59.9312      656151.2420      -21.4730  
-21.4753  
[25435]ENERGY: 11820000      3084.9571      5281.6679      5263.8615  
333.6182      -15852.4914      -1746.9458      0.0000      0.0000  
7716.1795      4080.8471      308.6858      -3635.3324      4144.8643  
307.7787      2.3308      -24.5845      656151.2420      -25.2714  
-25.2751  
[25485]ENERGY: 11830000      3212.2688      5245.1325      5211.7496  
323.8038      -15871.0606      -1781.6443      0.0000      0.0000  
7741.7755      4082.0253      309.7097      -3659.7502      4144.9762  
308.0037      -13.6885      -36.5979      656151.2420      -23.8105  
-23.8224  
[25521]ENERGY: 11840000      3183.2965      5193.5307      5289.4906  
333.1435      -15842.3997      -1742.1989      0.0000      0.0000  
7675.4104      4090.2731      307.0548      -3585.1373      4147.9877  
308.0325      191.9918      84.9405      656151.2420      -24.3479  
-24.3456  
[25571]ENERGY: 11850000      3191.1144      5203.3798      5255.2888  
346.5184      -15910.1000      -1709.2508      0.0000      0.0000  
7705.3628      4082.3135      308.2530      -3623.0494      4146.0092  
307.9729      36.6773      26.1179      656151.2420      -25.9892  
-25.9782  
[25607]ENERGY: 11860000      3190.4127      5184.7495      5263.4345  
337.2511      -15812.3294      -1831.7252      0.0000      0.0000  
7754.2080      4086.0013      310.2071      -3668.2067      4147.6913  
307.9393      108.4167      -29.7275      656151.2420      -22.2835  
-22.2871  
[25657]ENERGY: 11870000      3210.2012      5313.8777      5265.0952  
352.0486      -15941.8651      -1776.8732      0.0000      0.0000  
7660.5662      4083.0505      306.4609      -3577.5157      4148.4996  
308.0235      -70.0584      -131.0422      656151.2420      -26.5801  
-26.5802  
[25693]ENERGY: 11880000      3137.0323      5250.4894      5237.7338  
348.7553      -15854.1657      -1731.9530      0.0000      0.0000  
7696.6717      4084.5639      307.9053      -3612.1078      4147.7086  
307.8466      -24.3930      -4.7676      656151.2420      -23.7182  
-23.6956  
[25743]ENERGY: 11890000      3223.9106      5185.9780      5274.4657  
341.6939      -15819.0361      -1719.5995      0.0000      0.0000  
7599.5082      4086.9209      304.0183      -3512.5874      4148.2432  
307.8539      -130.8996      -95.5469      656151.2420      -25.1701  
-25.1899  
[25782]ENERGY: 11900000      3161.9212      5206.7223      5289.5775  
348.5708      -15857.0087      -1754.5763      0.0000      0.0000  
7695.2556      4090.4622      307.8487      -3604.7934      4149.4325  
307.9661      176.7142      59.3259      656151.2420      -24.3762  
-24.3842  
[25832]ENERGY: 11910000      3261.7509      5210.7457      5213.5098  
352.2617      -15833.8464      -1715.4608      0.0000      0.0000  
7601.1545      4090.1154      304.0842      -3511.0392      4150.1510

## Supplementary Text 6

|                         |             |            |             |           |
|-------------------------|-------------|------------|-------------|-----------|
| 307.9881                | 17.0376     | -60.6362   | 656151.2420 | -23.5095  |
| -23.4977                |             |            |             |           |
| [25868]ENERGY: 11920000 | 3232.4428   | 5167.4408  | 5293.7403   |           |
| 331.6660                | -15783.0972 | -1786.1472 | 0.0000      | 0.0000    |
| 7632.3562               | 4088.4018   | 305.3324   | -3543.9545  | 4150.1930 |
| 308.0141                | -40.2912    | -82.2341   | 656151.2420 | -23.2970  |
| -23.2981                |             |            |             |           |
| [25918]ENERGY: 11930000 | 3240.7566   | 5146.5903  | 5324.1469   |           |
| 329.3701                | -15828.2846 | -1786.0829 | 0.0000      | 0.0000    |
| 7661.1305               | 4087.6269   | 306.4835   | -3573.5035  | 4149.8322 |
| 308.0740                | -41.0827    | -103.4111  | 656151.2420 | -26.4470  |
| -26.4399                |             |            |             |           |
| [25954]ENERGY: 11940000 | 3217.4724   | 5189.0346  | 5277.5003   |           |
| 332.9030                | -15781.4500 | -1767.4400 | 0.0000      | 0.0000    |
| 7623.8429               | 4091.8632   | 304.9918   | -3531.9797  | 4150.8365 |
| 308.0743                | -53.6425    | -69.4786   | 656151.2420 | -23.1074  |
| -23.1091                |             |            |             |           |
| [26004]ENERGY: 11950000 | 3179.5079   | 5207.0785  | 5247.0913   |           |
| 316.4564                | -15876.7177 | -1723.6029 | 0.0000      | 0.0000    |
| 7736.1180               | 4085.9315   | 309.4834   | -3650.1865  | 4149.5668 |
| 307.9502                | -109.3203   | -144.2388  | 656151.2420 | -24.0813  |
| -24.0868                |             |            |             |           |
| [26040]ENERGY: 11960000 | 3205.1164   | 5291.0353  | 5279.2388   |           |
| 320.3471                | -15838.5024 | -1779.5939 | 0.0000      | 0.0000    |
| 7611.0675               | 4088.7089   | 304.4808   | -3522.3586  | 4149.3135 |
| 307.7875                | 174.9705    | 74.5911    | 656151.2420 | -22.6501  |
| -22.6573                |             |            |             |           |
| [26090]ENERGY: 11970000 | 3140.1300   | 5342.5392  | 5267.6490   |           |
| 323.5975                | -15910.3961 | -1766.4918 | 0.0000      | 0.0000    |
| 7688.9384               | 4085.9662   | 307.5960   | -3602.9722  | 4150.8646 |
| 307.9618                | 105.0418    | 47.0067    | 656151.2420 | -24.1067  |
| -24.1019                |             |            |             |           |
| [26126]ENERGY: 11980000 | 3231.7248   | 5149.7805  | 5301.2632   |           |
| 326.7730                | -15866.5542 | -1747.0671 | 0.0000      | 0.0000    |
| 7691.9172               | 4087.8375   | 307.7151   | -3604.0797  | 4150.2290 |
| 307.8575                | 85.0213     | -17.5822   | 656151.2420 | -22.8300  |
| -22.8320                |             |            |             |           |
| [26176]ENERGY: 11990000 | 3202.6975   | 5289.3824  | 5233.7796   |           |
| 349.8921                | -15937.0275 | -1695.8490 | 0.0000      | 0.0000    |
| 7645.6032               | 4088.4784   | 305.8624   | -3557.1248  | 4149.1686 |
| 307.9378                | 73.7329     | 89.6278    | 656151.2420 | -22.8775  |
| -22.8815                |             |            |             |           |
| [26215]ENERGY: 12000000 | 3202.5399   | 5242.3716  | 5285.6956   |           |
| 344.7025                | -15848.6670 | -1800.5809 | 0.0000      | 0.0000    |
| 7662.7201               | 4088.7818   | 306.5471   | -3573.9384  | 4149.7716 |
| 307.8289                | 79.4565     | 18.3222    | 656151.2420 | -25.0636  |
| -25.0603                |             |            |             |           |
| [26265]ENERGY: 12010000 | 3239.0108   | 5290.2908  | 5343.8948   |           |
| 375.1809                | -15893.4543 | -1872.7587 | 0.0000      | 0.0000    |
| 7607.9389               | 4090.1031   | 304.3556   | -3517.8357  | 4149.9713 |
| 307.8760                | -24.6232    | -107.9400  | 656151.2420 | -25.2839  |
| -25.2833                |             |            |             |           |
| [26301]ENERGY: 12020000 | 3192.3812   | 5128.5425  | 5299.9884   |           |
| 347.3290                | -15802.3027 | -1739.3156 | 0.0000      | 0.0000    |



## Supplementary Text 6

|                         |             |            |             |           |
|-------------------------|-------------|------------|-------------|-----------|
| 7662.3366               | 4088.9595   | 306.5318   | -3573.3771  | 4149.1622 |
| 307.8510                | 85.0492     | 37.3372    | 656151.2420 | -24.7677  |
| -24.7566                |             |            |             |           |
| [26351]ENERGY: 12030000 | 3175.6511   | 5281.0137  | 5217.8956   |           |
| 353.4083                | -15906.1097 | -1710.0078 | 0.0000      | 0.0000    |
| 7676.1015               | 4087.9527   | 307.0824   | -3588.1488  | 4148.4789 |
| 307.6631                | 42.2641     | 19.2744    | 656151.2420 | -24.7251  |
| -24.7280                |             |            |             |           |
| [26387]ENERGY: 12040000 | 3150.0742   | 5201.1208  | 5269.2101   |           |
| 342.1796                | -15771.1910 | -1767.5617 | 0.0000      | 0.0000    |
| 7661.4696               | 4085.3015   | 306.4971   | -3576.1681  | 4148.6481 |
| 307.6107                | 80.9098     | 106.3820   | 656151.2420 | -24.9266  |
| -24.9296                |             |            |             |           |
| [26437]ENERGY: 12050000 | 3204.5594   | 5281.1606  | 5259.0922   |           |
| 330.5424                | -15899.5489 | -1782.8786 | 0.0000      | 0.0000    |
| 7693.1568               | 4086.0839   | 307.7647   | -3607.0729  | 4148.6729 |
| 307.8751                | -32.4579    | -58.6546   | 656151.2420 | -24.2576  |
| -24.2500                |             |            |             |           |
| [26473]ENERGY: 12060000 | 3185.9239   | 5170.1663  | 5293.8770   |           |
| 335.2598                | -15787.4409 | -1792.4660 | 0.0000      | 0.0000    |
| 7682.3835               | 4087.7034   | 307.3337   | -3594.6800  | 4148.7339 |
| 307.8467                | 3.6275      | -37.2732   | 656151.2420 | -23.2526  |
| -23.2421                |             |            |             |           |
| [26523]ENERGY: 12070000 | 3195.5292   | 5220.6851  | 5257.7115   |           |
| 326.9536                | -15843.2019 | -1814.3553 | 0.0000      | 0.0000    |
| 7745.7595               | 4089.0817   | 309.8691   | -3656.6778  | 4150.1031 |
| 308.0842                | 144.6244    | 72.2244    | 656151.2420 | -24.7021  |
| -24.7085                |             |            |             |           |
| [26559]ENERGY: 12080000 | 3255.0682   | 5223.9915  | 5198.5549   |           |
| 356.7262                | -15818.7643 | -1826.8375 | 0.0000      | 0.0000    |
| 7700.6773               | 4089.4162   | 308.0656   | -3611.2611  | 4149.9119 |
| 308.2022                | -154.4737   | -110.7724  | 656151.2420 | -24.0337  |
| -24.0337                |             |            |             |           |
| [26609]ENERGY: 12090000 | 3195.3194   | 5248.9745  | 5275.1357   |           |
| 340.5166                | -15911.8294 | -1719.8282 | 0.0000      | 0.0000    |
| 7663.7359               | 4092.0246   | 306.5878   | -3571.7113  | 4150.3110 |
| 308.1032                | -102.1773   | -98.7215   | 656151.2420 | -21.6993  |
| -21.7195                |             |            |             |           |
| [26648]ENERGY: 12100000 | 3191.1468   | 5152.3603  | 5287.5966   |           |
| 312.4272                | -15810.0715 | -1750.6156 | 0.0000      | 0.0000    |
| 7702.2881               | 4085.1320   | 308.1300   | -3617.1561  | 4150.0061 |
| 307.9762                | -18.6664    | 25.2951    | 656151.2420 | -22.2900  |
| -22.2820                |             |            |             |           |
| [26698]ENERGY: 12110000 | 3215.5069   | 5219.8879  | 5306.2840   |           |
| 339.6396                | -15843.3400 | -1773.3578 | 0.0000      | 0.0000    |
| 7623.7130               | 4088.3337   | 304.9866   | -3535.3793  | 4151.0997 |
| 308.0540                | 118.3670    | 47.5026    | 656151.2420 | -28.7254  |
| -28.7294                |             |            |             |           |
| [26734]ENERGY: 12120000 | 3117.4459   | 5178.3700  | 5339.7554   |           |
| 354.4174                | -15799.0730 | -1772.4003 | 0.0000      | 0.0000    |
| 7671.1832               | 4089.6986   | 306.8857   | -3581.4846  | 4150.0789 |
| 308.3044                | 69.9616     | 37.4305    | 656151.2420 | -22.5760  |
| -22.5938                |             |            |             |           |
| [26784]ENERGY: 12130000 | 3177.6183   | 5245.0862  | 5242.3600   |           |

## Supplementary Text 6

|                         |             |            |             |           |
|-------------------------|-------------|------------|-------------|-----------|
| 350.6072                | -15929.5792 | -1637.3561 | 0.0000      | 0.0000    |
| 7641.1188               | 4089.8552   | 305.6830   | -3551.2636  | 4149.8687 |
| 308.2750                | 112.8753    | 41.4615    | 656151.2420 | -21.9867  |
| -21.9635                |             |            |             |           |
| [26820]ENERGY: 12140000 | 3172.7550   | 5142.1627  | 5281.2847   |           |
| 343.6008                | -15818.2802 | -1769.0274 | 0.0000      | 0.0000    |
| 7737.8819               | 4090.3776   | 309.5540   | -3647.5044  | 4151.2623 |
| 308.0713                | 46.9562     | 1.8643     | 656151.2420 | -24.0373  |
| -24.0534                |             |            |             |           |
| [26870]ENERGY: 12150000 | 3217.9775   | 5173.2846  | 5281.2193   |           |
| 336.3266                | -15778.8346 | -1860.3188 | 0.0000      | 0.0000    |
| 7717.3904               | 4087.0449   | 308.7342   | -3630.3455  | 4151.0394 |
| 308.2810                | -26.0828    | -97.6895   | 656151.2420 | -21.2301  |
| -21.2077                |             |            |             |           |
| [26906]ENERGY: 12160000 | 3234.1042   | 5108.7911  | 5247.3073   |           |
| 332.8470                | -15843.3599 | -1731.1562 | 0.0000      | 0.0000    |
| 7741.5359               | 4090.0695   | 309.7001   | -3651.4664  | 4151.1023 |
| 308.1056                | 31.0801     | 23.7167    | 656151.2420 | -27.2285  |
| -27.2302                |             |            |             |           |
| [26956]ENERGY: 12170000 | 3171.2744   | 5178.4634  | 5268.6539   |           |
| 345.6605                | -15842.0230 | -1722.4103 | 0.0000      | 0.0000    |
| 7689.8734               | 4089.4923   | 307.6334   | -3600.3810  | 4150.3751 |
| 308.1153                | -20.7362    | -41.0404   | 656151.2420 | -22.1224  |
| -22.1377                |             |            |             |           |
| [267]ENERGY: 12180000   | 3179.8214   | 5207.1626  | 5229.1277   |           |
| 360.9288                | -15789.5185 | -1830.6518 | 0.0000      | 0.0000    |
| 7731.2470               | 4088.1171   | 309.2885   | -3643.1298  | 4151.8209 |
| 308.1838                | -1.2009     | 9.9172     | 656151.2420 | -26.7415  |
| -26.7456                |             |            |             |           |
| [306]ENERGY: 12190000   | 3258.7886   | 5126.1966  | 5300.6821   |           |
| 350.6770                | -15928.1623 | -1744.8676 | 0.0000      | 0.0000    |
| 7723.9835               | 4087.2979   | 308.9980   | -3636.6855  | 4149.9292 |
| 308.1419                | -53.3362    | -49.6766   | 656151.2420 | -25.7225  |
| -25.7081                |             |            |             |           |
| [360]ENERGY: 12200000   | 3281.6807   | 5149.4118  | 5202.5815   |           |
| 312.3226                | -15922.6551 | -1696.6006 | 0.0000      | 0.0000    |
| 7761.0892               | 4087.8302   | 310.4824   | -3673.2590  | 4150.0195 |
| 308.1961                | 19.8066     | -31.6790   | 656151.2420 | -25.1249  |
| -25.1295                |             |            |             |           |
| [398]ENERGY: 12210000   | 3171.7394   | 5222.2752  | 5269.8215   |           |
| 350.2902                | -15881.8609 | -1722.8771 | 0.0000      | 0.0000    |
| 7679.5391               | 4088.9274   | 307.2200   | -3590.6117  | 4149.3250 |
| 308.4217                | 60.5550     | -17.3766   | 656151.2420 | -22.0896  |
| -22.0956                |             |            |             |           |
| [450]ENERGY: 12220000   | 3179.9563   | 5184.4371  | 5267.5048   |           |
| 345.5902                | -15884.2541 | -1736.1117 | 0.0000      | 0.0000    |
| 7730.3183               | 4087.4410   | 309.2514   | -3642.8773  | 4150.2261 |
| 308.1803                | 8.1725      | 35.7317    | 656151.2420 | -24.8793  |
| -24.8738                |             |            |             |           |
| [488]ENERGY: 12230000   | 3237.4080   | 5163.4004  | 5237.6636   |           |
| 328.5782                | -15817.9057 | -1746.1119 | 0.0000      | 0.0000    |
| 7685.4908               | 4088.5234   | 307.4581   | -3596.9675  | 4151.4918 |
| 308.3105                | 179.9875    | 38.3255    | 656151.2420 | -26.1767  |
| -26.1827                |             |            |             |           |

## Supplementary Text 6

|                       |             |            |             |           |
|-----------------------|-------------|------------|-------------|-----------|
| [539]ENERGY: 12240000 | 3195.3812   | 5260.5317  | 5253.2640   |           |
| 334.5297              | -15877.8020 | -1754.8377 | 0.0000      | 0.0000    |
| 7676.3418             | 4087.4086   | 307.0921   | -3588.9331  | 4150.6945 |
| 308.2185              | -24.0904    | -10.7509   | 656151.2420 | -23.1382  |
| -23.1231              |             |            |             |           |
| [576]ENERGY: 12250000 | 3211.0154   | 5213.4291  | 5250.9197   |           |
| 356.9000              | -15922.4864 | -1735.5492 | 0.0000      | 0.0000    |
| 7714.7391             | 4088.9678   | 308.6281   | -3625.7713  | 4150.4605 |
| 308.3210              | 41.3350     | 31.1024    | 656151.2420 | -26.4577  |
| -26.4644              |             |            |             |           |
| [627]ENERGY: 12260000 | 3137.2971   | 5196.3075  | 5233.0853   |           |
| 348.9393              | -15882.6648 | -1712.2988 | 0.0000      | 0.0000    |
| 7768.9046             | 4089.5703   | 310.7950   | -3679.3342  | 4150.6033 |
| 308.3271              | 118.8751    | 49.8046    | 656151.2420 | -22.6499  |
| -22.6719              |             |            |             |           |
| [664]ENERGY: 12270000 | 3264.9613   | 5211.5167  | 5233.6938   |           |
| 349.7407              | -15777.3542 | -1788.4709 | 0.0000      | 0.0000    |
| 7598.3068             | 4092.3942   | 303.9703   | -3505.9126  | 4150.5594 |
| 308.3507              | -124.7351   | -178.5000  | 656151.2420 | -24.5364  |
| -24.5023              |             |            |             |           |
| [715]ENERGY: 12280000 | 3243.6960   | 5252.6803  | 5247.5622   |           |
| 330.4018              | -15957.2672 | -1739.0976 | 0.0000      | 0.0000    |
| 7706.9178             | 4084.8932   | 308.3152   | -3622.0245  | 4149.4149 |
| 308.4162              | 130.3417    | 119.7183   | 656151.2420 | -19.0614  |
| -19.0797              |             |            |             |           |
| [751]ENERGY: 12290000 | 3168.9264   | 5234.1212  | 5291.0454   |           |
| 342.1039              | -15830.0062 | -1816.9008 | 0.0000      | 0.0000    |
| 7699.3207             | 4088.6107   | 308.0113   | -3610.7100  | 4151.2970 |
| 308.4277              | 176.2119    | 89.9022    | 656151.2420 | -26.0547  |
| -26.0467              |             |            |             |           |
| [804]ENERGY: 12300000 | 3216.7546   | 5114.0159  | 5299.9481   |           |
| 357.1702              | -15851.5468 | -1735.2891 | 0.0000      | 0.0000    |
| 7687.2602             | 4088.3131   | 307.5288   | -3598.9471  | 4150.3784 |
| 308.4146              | 17.6414     | 27.5348    | 656151.2420 | -19.8978  |
| -19.9025              |             |            |             |           |
| [840]ENERGY: 12310000 | 3243.2986   | 5167.9494  | 5253.6894   |           |
| 338.8209              | -15792.8410 | -1812.4702 | 0.0000      | 0.0000    |
| 7692.6988             | 4091.1460   | 307.7464   | -3601.5529  | 4150.5570 |
| 308.3394              | -71.4324    | -115.3212  | 656151.2420 | -29.8484  |
| -29.8223              |             |            |             |           |
| [890]ENERGY: 12320000 | 3212.4653   | 5246.5741  | 5274.6795   |           |
| 332.4584              | -15837.9494 | -1786.5783 | 0.0000      | 0.0000    |
| 7646.7797             | 4088.4292   | 305.9094   | -3558.3505  | 4150.8652 |
| 308.2420              | -6.5140     | 9.4887     | 656151.2420 | -20.1848  |
| -20.2144              |             |            |             |           |
| [926]ENERGY: 12330000 | 3150.8870   | 5268.0550  | 5262.8208   |           |
| 339.2413              | -15866.1134 | -1736.3950 | 0.0000      | 0.0000    |
| 7668.8001             | 4087.2959   | 306.7903   | -3581.5043  | 4150.8431 |
| 308.2460              | -25.7601    | -22.6607   | 656151.2420 | -25.3322  |
| -25.3310              |             |            |             |           |
| [976]ENERGY: 12340000 | 3181.3958   | 5176.8095  | 5229.0934   |           |
| 328.3308              | -15783.6431 | -1755.3702 | 0.0000      | 0.0000    |
| 7713.3378             | 4089.9541   | 308.5721   | -3623.3837  | 4152.2287 |
| 308.2441              | 121.7083    | 43.0736    | 656151.2420 | -22.8468  |

Supplementary Text 6

-22.8418  
 [1012]ENERGY: 12350000      3194.9625      5091.3218      5304.3129  
 333.7759      -15749.4689      -1773.4294      0.0000      0.0000  
 7688.3376      4089.8124      307.5719      -3598.5252      4149.7858  
 308.0184      55.5201      -29.0257      656151.2420      -24.6093  
 -24.6086  
 [1062]ENERGY: 12360000      3072.7959      5257.2186      5214.2224  
 334.4905      -15841.4178      -1736.1367      0.0000      0.0000  
 7785.4377      4086.6108      311.4564      -3698.8270      4149.5664  
 308.1830      -5.1773      -61.5099      656151.2420      -24.9850  
 -24.9974  
 [1098]ENERGY: 12370000      3253.2594      5254.1466      5235.6829  
 308.7887      -15841.1623      -1759.6205      0.0000      0.0000  
 7635.5729      4086.6677      305.4611      -3548.9052      4149.6021  
 308.0775      2.4199      -99.0952      656151.2420      -21.3196  
 -21.3002  
 [1148]ENERGY: 12380000      3187.4657      5228.9992      5261.4208  
 328.1043      -15888.3097      -1736.3263      0.0000      0.0000  
 7703.3621      4084.7161      308.1730      -3618.6460      4150.0001  
 308.0426      9.6453      -0.7306      656151.2420      -21.3254  
 -21.3441  
 [1184]ENERGY: 12390000      3162.9065      5265.5878      5309.7480  
 345.1681      -15945.9418      -1779.0544      0.0000      0.0000  
 7729.3086      4087.7228      309.2110      -3641.5858      4149.5220  
 308.1411      67.4076      -16.5263      656151.2420      -22.3979  
 -22.3773  
 [1237]ENERGY: 12400000      3167.0975      5155.0361      5271.4450  
 342.4811      -15828.5950      -1792.2156      0.0000      0.0000  
 7769.3390      4084.5880      310.8124      -3684.7510      4150.1166  
 308.0901      3.2928      -92.7446      656151.2420      -25.9276  
 -25.9340  
 [1273]ENERGY: 12410000      3172.5902      5185.1001      5219.6032  
 343.8834      -15923.0129      -1687.4077      0.0000      0.0000  
 7777.7532      4088.5095      311.1490      -3689.2437      4150.7179  
 308.0694      121.4538      155.4214      656151.2420      -19.6457  
 -19.6322  
 [1323]ENERGY: 12420000      3185.3303      5250.8533      5265.4072  
 333.3297      -15782.6489      -1794.5343      0.0000      0.0000  
 7633.9187      4091.6560      305.3949      -3542.2627      4151.5206  
 308.1943      -159.8084      -123.4740      656151.2420      -22.1467  
 -22.1629  
 [1359]ENERGY: 12430000      3151.1957      5237.7683      5304.0179  
 338.8716      -15930.1251      -1737.0387      0.0000      0.0000  
 7724.5650      4089.2546      309.0212      -3635.3104      4151.0914  
 308.2361      69.0015      -52.7086      656151.2420      -20.3271  
 -20.3433  
 [1409]ENERGY: 12440000      3183.3964      5272.3297      5221.8167  
 323.7365      -15884.5128      -1715.1116      0.0000      0.0000  
 7690.5042      4092.1592      307.6586      -3598.3451      4152.1730  
 308.2261      88.8146      51.7946      656151.2420      -21.2694  
 -21.2488  
 [1445]ENERGY: 12450000      3164.6179      5248.7808      5249.4591  
 335.0285      -15910.2560      -1737.3783      0.0000      0.0000  
 7738.1056      4088.3576      309.5629      -3649.7480      4151.0338

## Supplementary Text 6

|                        |             |            |             |           |
|------------------------|-------------|------------|-------------|-----------|
| 308.2172               | 19.8689     | -1.8158    | 656151.2420 | -21.6883  |
| -21.6859               |             |            |             |           |
| [1495]ENERGY: 12460000 | 3216.4719   | 5262.0175  | 5259.1168   |           |
| 330.0209               | -15831.8753 | -1771.7087 | 0.0000      | 0.0000    |
| 7626.5335              | 4090.5767   | 305.0995   | -3535.9569  | 4151.8137 |
| 308.1422               | -15.3792    | -96.1544   | 656151.2420 | -21.7033  |
| -21.7181               |             |            |             |           |
| [1531]ENERGY: 12470000 | 3251.7143   | 5288.6522  | 5249.5680   |           |
| 369.9854               | -15880.1812 | -1758.2840 | 0.0000      | 0.0000    |
| 7568.9385              | 4090.3930   | 302.7954   | -3478.5454  | 4153.0150 |
| 308.3324               | -113.6888   | -83.0103   | 656151.2420 | -24.2622  |
| -24.2576               |             |            |             |           |
| [1581]ENERGY: 12480000 | 3250.8181   | 5223.1459  | 5259.6553   |           |
| 348.7798               | -15910.3454 | -1738.8364 | 0.0000      | 0.0000    |
| 7658.5703              | 4091.7876   | 306.3811   | -3566.7827  | 4152.9553 |
| 308.0818               | 27.3225     | 21.5083    | 656151.2420 | -20.7426  |
| -20.7330               |             |            |             |           |
| [1617]ENERGY: 12490000 | 3195.1968   | 5138.8478  | 5246.4835   |           |
| 362.4907               | -15846.1515 | -1705.4468 | 0.0000      | 0.0000    |
| 7698.4010              | 4089.8215   | 307.9745   | -3608.5795  | 4152.2115 |
| 308.0497               | -24.3919    | -80.2319   | 656151.2420 | -24.8973  |
| -24.9041               |             |            |             |           |
| [1670]ENERGY: 12500000 | 3232.6886   | 5258.7747  | 5231.7332   |           |
| 340.7153               | -15912.9276 | -1721.0050 | 0.0000      | 0.0000    |
| 7665.1949              | 4095.1741   | 306.6461   | -3570.0208  | 4153.8395 |
| 308.0340               | 12.2510     | -27.5207   | 656151.2420 | -22.1442  |
| -22.1412               |             |            |             |           |
| [1706]ENERGY: 12510000 | 3153.7429   | 5253.2880  | 5285.3857   |           |
| 349.2460               | -15863.3735 | -1749.9225 | 0.0000      | 0.0000    |
| 7662.5242              | 4090.8909   | 306.5393   | -3571.6333  | 4153.0751 |
| 308.0266               | 208.5262    | 137.6987   | 656151.2420 | -25.1052  |
| -25.1025               |             |            |             |           |
| [1756]ENERGY: 12520000 | 3185.2018   | 5172.5037  | 5315.2200   |           |
| 342.8942               | -15890.2846 | -1751.7332 | 0.0000      | 0.0000    |
| 7718.5603              | 4092.3623   | 308.7810   | -3626.1980  | 4153.8775 |
| 307.8375               | -24.8152    | -83.1533   | 656151.2420 | -22.5723  |
| -22.5767               |             |            |             |           |
| [1792]ENERGY: 12530000 | 3281.7867   | 5209.3892  | 5285.2661   |           |
| 318.5212               | -15942.5357 | -1705.3924 | 0.0000      | 0.0000    |
| 7646.7440              | 4093.7791   | 305.9080   | -3552.9649  | 4154.4976 |
| 308.0263               | 72.4302     | 60.9477    | 656151.2420 | -21.7463  |
| -21.7501               |             |            |             |           |
| [1842]ENERGY: 12540000 | 3261.2472   | 5234.8088  | 5291.7499   |           |
| 333.5018               | -15840.5854 | -1809.1885 | 0.0000      | 0.0000    |
| 7623.9701              | 4095.5039   | 304.9969   | -3528.4662  | 4155.7691 |
| 308.0046               | -43.8075    | -52.9964   | 656151.2420 | -18.8758  |
| -18.8669               |             |            |             |           |
| [1878]ENERGY: 12550000 | 3159.6676   | 5127.0049  | 5257.0574   |           |
| 346.6881               | -15747.1974 | -1739.8727 | 0.0000      | 0.0000    |
| 7692.9255              | 4096.2733   | 307.7555   | -3596.6522  | 4155.5521 |
| 307.8706               | 211.5863    | 95.9999    | 656151.2420 | -21.2153  |
| -21.2170               |             |            |             |           |
| [1928]ENERGY: 12560000 | 3134.1585   | 5151.6091  | 5227.7937   |           |
| 337.0403               | -15741.2235 | -1749.7068 | 0.0000      | 0.0000    |

## Supplementary Text 6

|                        |             |            |             |           |
|------------------------|-------------|------------|-------------|-----------|
| 7732.5310              | 4092.2022   | 309.3399   | -3640.3288  | 4155.8168 |
| 307.9365               | -12.6678    | -61.3234   | 656151.2420 | -22.9418  |
| -22.9356               |             |            |             |           |
| [1964]ENERGY: 12570000 | 3187.6293   | 5247.7020  | 5274.4417   |           |
| 351.4037               | -15835.4231 | -1823.4353 | 0.0000      | 0.0000    |
| 7688.8546              | 4091.1730   | 307.5926   | -3597.6816  | 4156.4051 |
| 308.1175               | 21.1806     | -57.8160   | 656151.2420 | -23.6360  |
| -23.6505               |             |            |             |           |
| [2014]ENERGY: 12580000 | 3139.3299   | 5234.2528  | 5235.2309   |           |
| 328.8084               | -15744.7050 | -1757.1056 | 0.0000      | 0.0000    |
| 7658.2513              | 4094.0627   | 306.3683   | -3564.1886  | 4154.8806 |
| 308.1150               | -52.4929    | 30.9729    | 656151.2420 | -25.0905  |
| -25.0751               |             |            |             |           |
| [2050]ENERGY: 12590000 | 3177.5748   | 5271.4544  | 5259.9560   |           |
| 320.9866               | -15831.6251 | -1833.9372 | 0.0000      | 0.0000    |
| 7726.3071              | 4090.7166   | 309.0909   | -3635.5905  | 4156.5961 |
| 308.0138               | 0.8418      | -22.6821   | 656151.2420 | -22.1539  |
| -22.1796               |             |            |             |           |
| [2103]ENERGY: 12600000 | 3195.6166   | 5142.4990  | 5259.2589   |           |
| 322.3443               | -15762.4613 | -1785.3604 | 0.0000      | 0.0000    |
| 7723.9080              | 4095.8052   | 308.9949   | -3628.1028  | 4156.1640 |
| 308.1222               | -193.6594   | -158.4334  | 656151.2420 | -24.0527  |
| -24.0232               |             |            |             |           |
| [2139]ENERGY: 12610000 | 3151.9489   | 5197.5508  | 5297.1514   |           |
| 343.5770               | -15864.5401 | -1738.9509 | 0.0000      | 0.0000    |
| 7707.1166              | 4093.8537   | 308.3232   | -3613.2629  | 4156.1290 |
| 308.1026               | -35.9103    | -2.5907    | 656151.2420 | -21.5756  |
| -21.5845               |             |            |             |           |
| [2189]ENERGY: 12620000 | 3209.7956   | 5163.8882  | 5248.3804   |           |
| 342.2901               | -15801.2052 | -1714.1662 | 0.0000      | 0.0000    |
| 7649.6889              | 4098.6718   | 306.0258   | -3551.0170  | 4157.2972 |
| 308.0482               | -42.0122    | -98.9517   | 656151.2420 | -19.2465  |
| -19.2676               |             |            |             |           |
| [2225]ENERGY: 12630000 | 3151.6103   | 5241.9788  | 5243.5647   |           |
| 323.1694               | -15845.7831 | -1755.1956 | 0.0000      | 0.0000    |
| 7733.6253              | 4092.9698   | 309.3837   | -3640.6555  | 4156.2183 |
| 308.0410               | -10.8314    | 19.6767    | 656151.2420 | -24.3340  |
| -24.3305               |             |            |             |           |
| [2275]ENERGY: 12640000 | 3278.0667   | 5206.7384  | 5233.1310   |           |
| 330.3276               | -15823.7776 | -1746.4684 | 0.0000      | 0.0000    |
| 7619.4010              | 4097.4187   | 304.8141   | -3521.9823  | 4157.2661 |
| 307.9725               | -170.6636   | -155.1006  | 656151.2420 | -18.6897  |
| -18.6598               |             |            |             |           |
| [2311]ENERGY: 12650000 | 3131.1142   | 5230.6592  | 5271.6528   |           |
| 363.6805               | -15887.3652 | -1707.8235 | 0.0000      | 0.0000    |
| 7693.8340              | 4095.7520   | 307.7918   | -3598.0821  | 4156.7585 |
| 308.1777               | 160.7551    | 7.9308     | 656151.2420 | -21.1190  |
| -21.1416               |             |            |             |           |
| [2361]ENERGY: 12660000 | 3274.4570   | 5131.4912  | 5254.8823   |           |
| 335.6994               | -15843.8975 | -1710.9888 | 0.0000      | 0.0000    |
| 7657.6986              | 4099.3423   | 306.3462   | -3558.3563  | 4157.6066 |
| 308.1116               | 52.3622     | -32.0240   | 656151.2420 | -16.7986  |
| -16.7993               |             |            |             |           |
| [2397]ENERGY: 12670000 | 3234.6203   | 5218.8212  | 5260.4888   |           |

## Supplementary Text 6

|                        |             |            |             |           |
|------------------------|-------------|------------|-------------|-----------|
| 323.0527               | -15886.4105 | -1722.1847 | 0.0000      | 0.0000    |
| 7669.7480              | 4098.1357   | 306.8283   | -3571.6122  | 4158.1348 |
| 308.0768               | 93.5736     | 114.8040   | 656151.2420 | -19.2244  |
| -19.2084               |             |            |             |           |
| [2447]ENERGY: 12680000 | 3262.9019   | 5207.6305  | 5249.2257   |           |
| 336.1836               | -15804.3825 | -1815.4706 | 0.0000      | 0.0000    |
| 7660.0690              | 4096.1575   | 306.4411   | -3563.9115  | 4158.5914 |
| 308.0887               | -113.0767   | -106.9038  | 656151.2420 | -17.1653  |
| -17.1752               |             |            |             |           |
| [2483]ENERGY: 12690000 | 3203.6420   | 5233.8311  | 5232.0687   |           |
| 348.7268               | -15927.7830 | -1738.1703 | 0.0000      | 0.0000    |
| 7742.2104              | 4094.5257   | 309.7271   | -3647.6847  | 4157.0530 |
| 308.1025               | 37.2534     | -7.1520    | 656151.2420 | -18.9440  |
| -18.9520               |             |            |             |           |
| [2536]ENERGY: 12700000 | 3211.6274   | 5203.2454  | 5237.2606   |           |
| 341.6590               | -15842.1105 | -1805.9773 | 0.0000      | 0.0000    |
| 7749.2854              | 4094.9899   | 310.0102   | -3654.2955  | 4158.1344 |
| 308.2085               | -49.8376    | 45.2481    | 656151.2420 | -20.9892  |
| -20.9679               |             |            |             |           |
| [2572]ENERGY: 12710000 | 3226.5813   | 5091.2602  | 5281.3389   |           |
| 365.8946               | -15770.8718 | -1799.0033 | 0.0000      | 0.0000    |
| 7701.2263              | 4096.4262   | 308.0876   | -3604.8000  | 4158.4493 |
| 308.1553               | -79.5754    | -128.3973  | 656151.2420 | -17.1544  |
| -17.1593               |             |            |             |           |
| [2622]ENERGY: 12720000 | 3141.3428   | 5175.1437  | 5308.3149   |           |
| 355.7782               | -15831.8739 | -1734.5223 | 0.0000      | 0.0000    |
| 7683.3180              | 4097.5013   | 307.3711   | -3585.8167  | 4157.9267 |
| 308.1333               | 41.6856     | 11.5913    | 656151.2420 | -17.5695  |
| -17.5645               |             |            |             |           |
| [2658]ENERGY: 12730000 | 3173.0565   | 5163.1565  | 5304.7803   |           |
| 336.1187               | -15809.4309 | -1814.3965 | 0.0000      | 0.0000    |
| 7741.3882              | 4094.6728   | 309.6942   | -3646.7154  | 4158.5906 |
| 308.0030               | 33.1031     | 24.7452    | 656151.2420 | -20.7937  |
| -20.8186               |             |            |             |           |
| [2708]ENERGY: 12740000 | 3149.5212   | 5187.0428  | 5301.7860   |           |
| 348.6694               | -15865.4044 | -1700.0656 | 0.0000      | 0.0000    |
| 7674.3253              | 4095.8746   | 307.0114   | -3578.4508  | 4157.4477 |
| 308.0949               | -39.4340    | -57.5107   | 656151.2420 | -16.8138  |
| -16.8066               |             |            |             |           |
| [2744]ENERGY: 12750000 | 3203.2832   | 5238.1327  | 5242.0571   |           |
| 332.1393               | -15846.6109 | -1780.3494 | 0.0000      | 0.0000    |
| 7707.9850              | 4096.6371   | 308.3579   | -3611.3479  | 4158.4876 |
| 308.1293               | -34.1120    | -82.9201   | 656151.2420 | -16.5010  |
| -16.5033               |             |            |             |           |
| [2794]ENERGY: 12760000 | 3213.0462   | 5157.8241  | 5306.1594   |           |
| 351.8984               | -15869.8267 | -1794.7447 | 0.0000      | 0.0000    |
| 7730.3133              | 4094.6701   | 309.2512   | -3635.6433  | 4158.7616 |
| 308.1002               | -74.8991    | -79.8097   | 656151.2420 | -21.1154  |
| -21.1123               |             |            |             |           |
| [2830]ENERGY: 12770000 | 3148.3654   | 5235.0698  | 5214.1387   |           |
| 343.2364               | -15905.6279 | -1765.8954 | 0.0000      | 0.0000    |
| 7824.0522              | 4093.3391   | 313.0012   | -3730.7131  | 4159.5509 |
| 308.3249               | 18.6467     | -9.3640    | 656151.2420 | -15.4703  |
| -15.4740               |             |            |             |           |

## Supplementary Text 6

|                        |             |            |             |           |
|------------------------|-------------|------------|-------------|-----------|
| [2880]ENERGY: 12780000 | 3243.1170   | 5321.2753  | 5278.6381   |           |
| 342.4133               | -15885.1846 | -1826.2559 | 0.0000      | 0.0000    |
| 7621.9645              | 4095.9675   | 304.9167   | -3525.9970  | 4159.8172 |
| 308.2789               | -80.2753    | -170.7837  | 656151.2420 | -19.7711  |
| -19.7809               |             |            |             |           |
| [2916]ENERGY: 12790000 | 3261.8580   | 5213.8464  | 5270.8500   |           |
| 336.2667               | -15841.4342 | -1785.0458 | 0.0000      | 0.0000    |
| 7644.0998              | 4100.4409   | 305.8022   | -3543.6589  | 4160.2721 |
| 308.1456               | 74.9615     | 5.8008     | 656151.2420 | -20.9863  |
| -20.9768               |             |            |             |           |
| [2969]ENERGY: 12800000 | 3133.5243   | 5231.4865  | 5254.1412   |           |
| 342.0888               | -15779.8509 | -1767.3896 | 0.0000      | 0.0000    |
| 7685.0007              | 4099.0011   | 307.4385   | -3585.9996  | 4160.5302 |
| 308.0296               | 92.1681     | -21.9356   | 656151.2420 | -21.0209  |
| -21.0185               |             |            |             |           |
| [3005]ENERGY: 12810000 | 3231.8758   | 5179.8421  | 5226.2635   |           |
| 353.0893               | -15888.3932 | -1732.9959 | 0.0000      | 0.0000    |
| 7729.1683              | 4098.8499   | 309.2054   | -3630.3184  | 4159.6477 |
| 308.0967               | 32.7823     | 5.7164     | 656151.2420 | -20.1804  |
| -20.1750               |             |            |             |           |
| [3055]ENERGY: 12820000 | 3212.7395   | 5219.3994  | 5236.6019   |           |
| 348.5949               | -15875.3980 | -1722.2334 | 0.0000      | 0.0000    |
| 7679.8105              | 4099.5148   | 307.2308   | -3580.2957  | 4161.5961 |
| 308.1090               | 23.9421     | 1.3238     | 656151.2420 | -19.0932  |
| -19.0941               |             |            |             |           |
| [3091]ENERGY: 12830000 | 3204.5852   | 5179.1407  | 5262.9640   |           |
| 323.7722               | -15763.8876 | -1792.4053 | 0.0000      | 0.0000    |
| 7685.0601              | 4099.2291   | 307.4408   | -3585.8310  | 4162.3525 |
| 307.9651               | 41.4978     | 19.7660    | 656151.2420 | -18.7502  |
| -18.7445               |             |            |             |           |
| [3141]ENERGY: 12840000 | 3218.6277   | 5252.7638  | 5248.6404   |           |
| 322.0298               | -15902.3996 | -1735.6456 | 0.0000      | 0.0000    |
| 7696.4922              | 4100.5087   | 307.8982   | -3595.9836  | 4163.1352 |
| 308.2178               | 55.7945     | 68.1021    | 656151.2420 | -20.6455  |
| -20.6437               |             |            |             |           |
| [3177]ENERGY: 12850000 | 3221.8965   | 5204.7805  | 5245.3145   |           |
| 333.4373               | -15831.5654 | -1791.8745 | 0.0000      | 0.0000    |
| 7716.8861              | 4098.8749   | 308.7140   | -3618.0112  | 4162.8761 |
| 308.0983               | 43.4151     | 33.5674    | 656151.2420 | -22.3845  |
| -22.3880               |             |            |             |           |
| [3227]ENERGY: 12860000 | 3153.6893   | 5145.5100  | 5276.0373   |           |
| 350.7033               | -15790.9621 | -1746.9660 | 0.0000      | 0.0000    |
| 7713.8507              | 4101.8624   | 308.5926   | -3611.9883  | 4163.4899 |
| 308.1105               | 37.9553     | -23.9139   | 656151.2420 | -19.1644  |
| -19.1767               |             |            |             |           |
| [3263]ENERGY: 12870000 | 3177.6783   | 5220.6418  | 5321.6575   |           |
| 351.4139               | -15854.8081 | -1801.1131 | 0.0000      | 0.0000    |
| 7687.3799              | 4102.8502   | 307.5336   | -3584.5297  | 4164.2289 |
| 308.1009               | 32.2319     | -56.6546   | 656151.2420 | -17.2180  |
| -17.2216               |             |            |             |           |
| [3313]ENERGY: 12880000 | 3258.5030   | 5181.3833  | 5268.9665   |           |
| 339.8060               | -15872.2229 | -1768.7421 | 0.0000      | 0.0000    |
| 7696.4823              | 4104.1760   | 307.8978   | -3592.3063  | 4163.3442 |
| 308.1299               | 18.8452     | -1.5448    | 656151.2420 | -17.4376  |



## Supplementary Text 6

-17.4150

|                        |             |            |                      |
|------------------------|-------------|------------|----------------------|
| [3349]ENERGY: 12890000 | 3136.2261   | 5244.9341  | 5298.2150            |
| 333.5625               | -15841.6011 | -1730.0279 | 0.0000 0.0000        |
| 7662.8236              | 4104.1323   | 306.5513   | -3558.6912 4165.6502 |
| 308.1808               | 32.4189     | -72.6931   | 656151.2420 -24.3640 |

-24.3868

|                        |             |            |                      |
|------------------------|-------------|------------|----------------------|
| [3402]ENERGY: 12900000 | 3259.3699   | 5242.0258  | 5256.9337            |
| 321.6947               | -15932.9803 | -1683.9133 | 0.0000 0.0000        |
| 7641.2345              | 4104.3650   | 305.6876   | -3536.8695 4164.9484 |
| 307.9433               | 205.0444    | 92.5762    | 656151.2420 -17.8185 |

-17.7845

|                        |             |            |                      |
|------------------------|-------------|------------|----------------------|
| [3438]ENERGY: 12910000 | 3275.3463   | 5331.5926  | 5256.6293            |
| 317.5158               | -15914.9078 | -1778.0655 | 0.0000 0.0000        |
| 7619.3115              | 4107.4224   | 304.8106   | -3511.8892 4164.9822 |
| 308.2012               | 50.7292     | -70.3699   | 656151.2420 -21.5155 |

-21.5683

|                        |             |            |                      |
|------------------------|-------------|------------|----------------------|
| [3488]ENERGY: 12920000 | 3200.8293   | 5155.1227  | 5318.1164            |
| 350.1481               | -15933.0204 | -1760.0646 | 0.0000 0.0000        |
| 7771.7297              | 4102.8612   | 310.9080   | -3668.8685 4165.7862 |
| 308.3199               | 64.2781     | 36.8794    | 656151.2420 -21.5092 |

-21.4602

|                        |             |            |                      |
|------------------------|-------------|------------|----------------------|
| [3524]ENERGY: 12930000 | 3228.5708   | 5189.3593  | 5295.2657            |
| 338.2114               | -15869.2748 | -1807.6437 | 0.0000 0.0000        |
| 7729.6561              | 4104.1447   | 309.2249   | -3625.5114 4165.4645 |
| 308.2180               | -121.6736   | -226.1134  | 656151.2420 -21.5595 |

-21.5681

|                        |             |            |                      |
|------------------------|-------------|------------|----------------------|
| [3574]ENERGY: 12940000 | 3226.7964   | 5221.6949  | 5287.6317            |
| 326.8596               | -15844.1387 | -1821.5756 | 0.0000 0.0000        |
| 7709.4347              | 4106.7029   | 308.4159   | -3602.7317 4166.5031 |
| 308.1769               | -148.7876   | -152.0746  | 656151.2420 -20.0969 |

-20.1141

|                        |             |            |                      |
|------------------------|-------------|------------|----------------------|
| [3610]ENERGY: 12950000 | 3145.7918   | 5331.7218  | 5267.8932            |
| 346.0927               | -15874.4491 | -1805.0660 | 0.0000 0.0000        |
| 7694.1030              | 4106.0875   | 307.8026   | -3588.0155 4167.3235 |
| 308.0665               | -103.4612   | -158.8276  | 656151.2420 -19.5820 |

-19.5828

|                        |             |            |                      |
|------------------------|-------------|------------|----------------------|
| [3660]ENERGY: 12960000 | 3212.2853   | 5260.4369  | 5273.0227            |
| 350.3307               | -15944.6580 | -1760.6859 | 0.0000 0.0000        |
| 7712.8706              | 4103.6023   | 308.5534   | -3609.2683 4166.1713 |
| 308.1497               | -60.7206    | -72.9668   | 656151.2420 -23.0953 |

-23.0778

|                        |             |            |                      |
|------------------------|-------------|------------|----------------------|
| [3696]ENERGY: 12970000 | 3263.9491   | 5180.8155  | 5285.1803            |
| 343.8719               | -15831.7240 | -1783.4842 | 0.0000 0.0000        |
| 7648.7734              | 4107.3820   | 305.9892   | -3541.3914 4167.3268 |
| 307.9808               | -74.4859    | -126.5066  | 656151.2420 -19.7834 |

-19.7920

|                        |             |            |                      |
|------------------------|-------------|------------|----------------------|
| [3746]ENERGY: 12980000 | 3182.2202   | 5205.7646  | 5279.4158            |
| 339.5344               | -15828.6632 | -1776.1028 | 0.0000 0.0000        |
| 7703.1696              | 4105.3387   | 308.1653   | -3597.8309 4167.3969 |
| 307.8256               | 2.7340      | -76.5173   | 656151.2420 -24.4341 |

-24.4252

|                       |             |            |                      |
|-----------------------|-------------|------------|----------------------|
| [267]ENERGY: 12990000 | 3205.3060   | 5293.2516  | 5301.9845            |
| 373.4929              | -15858.0837 | -1838.4873 | 0.0000 0.0000        |
| 7627.5983             | 4105.0623   | 305.1421   | -3522.5360 4168.3919 |

## Supplementary Text 6

|                       |             |            |             |           |
|-----------------------|-------------|------------|-------------|-----------|
| 308.1119              | -2.0812     | -38.3020   | 656151.2420 | -19.6073  |
| -19.6224              |             |            |             |           |
| [308]ENERGY: 13000000 | 3213.2335   | 5186.6025  | 5257.4542   |           |
| 340.6402              | -15805.7317 | -1794.2734 | 0.0000      | 0.0000    |
| 7707.4353             | 4105.3606   | 308.3359   | -3602.0747  | 4166.6923 |
| 308.0377              | 93.6560     | 57.1789    | 656151.2420 | -19.6120  |
| -19.6156              |             |            |             |           |
| [360]ENERGY: 13010000 | 3176.1395   | 5176.5957  | 5294.3253   |           |
| 349.0092              | -15827.1321 | -1768.8478 | 0.0000      | 0.0000    |
| 7706.6764             | 4106.7663   | 308.3056   | -3599.9102  | 4168.0216 |
| 308.1970              | 41.5737     | 41.2290    | 656151.2420 | -19.3629  |
| -19.3455              |             |            |             |           |
| [398]ENERGY: 13020000 | 3230.6311   | 5245.2170  | 5323.6056   |           |
| 332.0260              | -15800.6470 | -1822.8862 | 0.0000      | 0.0000    |
| 7602.4614             | 4110.4079   | 304.1365   | -3492.0535  | 4168.3279 |
| 308.1861              | 50.4406     | 34.2649    | 656151.2420 | -20.3830  |
| -20.4047              |             |            |             |           |
| [450]ENERGY: 13030000 | 3171.0632   | 5287.2016  | 5280.1857   |           |
| 332.5454              | -15908.1761 | -1814.7690 | 0.0000      | 0.0000    |
| 7757.1801             | 4105.2310   | 310.3260   | -3651.9492  | 4166.9714 |
| 308.1640              | 4.5017      | -13.0152   | 656151.2420 | -18.7991  |
| -18.7857              |             |            |             |           |
| [488]ENERGY: 13040000 | 3230.7496   | 5243.1159  | 5291.4502   |           |
| 339.1054              | -15929.6117 | -1756.3942 | 0.0000      | 0.0000    |
| 7686.7841             | 4105.1993   | 307.5098   | -3581.5848  | 4167.3539 |
| 308.1860              | 102.8594    | 36.8051    | 656151.2420 | -18.7851  |
| -18.7975              |             |            |             |           |
| [539]ENERGY: 13050000 | 3214.4592   | 5229.5809  | 5276.2692   |           |
| 332.2683              | -15924.1269 | -1796.0394 | 0.0000      | 0.0000    |
| 7769.1549             | 4101.5662   | 310.8050   | -3667.5887  | 4167.3978 |
| 308.2460              | -203.2716   | -277.1457  | 656151.2420 | -19.4663  |
| -19.4596              |             |            |             |           |
| [576]ENERGY: 13060000 | 3232.7945   | 5181.4075  | 5263.7685   |           |
| 331.6954              | -15815.0624 | -1741.3833 | 0.0000      | 0.0000    |
| 7654.2445             | 4107.4647   | 306.2081   | -3546.7798  | 4167.7604 |
| 308.3489              | 0.3300      | -29.4128   | 656151.2420 | -21.4439  |
| -21.4406              |             |            |             |           |
| [627]ENERGY: 13070000 | 3217.9369   | 5275.3212  | 5250.1998   |           |
| 331.7426              | -15899.0505 | -1745.6125 | 0.0000      | 0.0000    |
| 7676.7881             | 4107.3255   | 307.1099   | -3569.4626  | 4166.5986 |
| 308.2567              | -68.5922    | -91.6771   | 656151.2420 | -21.8791  |
| -21.8632              |             |            |             |           |
| [664]ENERGY: 13080000 | 3137.1432   | 5169.5805  | 5265.6401   |           |
| 347.7297              | -15823.7603 | -1797.0876 | 0.0000      | 0.0000    |
| 7801.9594             | 4101.2050   | 312.1174   | -3700.7544  | 4166.4495 |
| 308.3455              | -40.5590    | -27.6181   | 656151.2420 | -16.7745  |
| -16.8104              |             |            |             |           |
| [715]ENERGY: 13090000 | 3281.7589   | 5219.3467  | 5276.8114   |           |
| 362.7164              | -15853.0148 | -1795.9459 | 0.0000      | 0.0000    |
| 7617.2120             | 4108.8847   | 304.7266   | -3508.3273  | 4166.7013 |
| 308.2025              | -109.1570   | -113.8468  | 656151.2420 | -24.1412  |
| -24.1169              |             |            |             |           |
| [754]ENERGY: 13100000 | 3234.8125   | 5223.3062  | 5286.6931   |           |
| 334.5909              | -15968.0545 | -1740.3328 | 0.0000      | 0.0000    |

## Supplementary Text 6

|                        |             |            |             |           |
|------------------------|-------------|------------|-------------|-----------|
| 7733.9357              | 4104.9512   | 309.3961   | -3628.9845  | 4167.3250 |
| 308.1899               | -95.4077    | -186.5933  | 656151.2420 | -21.8836  |
| -21.8926               |             |            |             |           |
| [804]ENERGY: 13110000  | 3224.6079   | 5195.4472  | 5221.7695   |           |
| 337.5385               | -15854.2572 | -1686.7073 | 0.0000      | 0.0000    |
| 7664.9587              | 4103.3572   | 306.6367   | -3561.6015  | 4166.6944 |
| 308.2822               | 32.5854     | -0.2009    | 656151.2420 | -23.8773  |
| -23.8569               |             |            |             |           |
| [840]ENERGY: 13120000  | 3274.7910   | 5285.4031  | 5272.9307   |           |
| 338.3657               | -15956.0691 | -1698.8511 | 0.0000      | 0.0000    |
| 7596.3285              | 4112.8988   | 303.8911   | -3483.4297  | 4167.6307 |
| 308.4309               | 30.6812     | -102.5592  | 656151.2420 | -17.7170  |
| -17.7436               |             |            |             |           |
| [890]ENERGY: 13130000  | 3169.0273   | 5215.6275  | 5282.3328   |           |
| 356.6975               | -15810.6016 | -1838.7141 | 0.0000      | 0.0000    |
| 7730.6811              | 4105.0505   | 309.2659   | -3625.6306  | 4169.2689 |
| 308.2192               | -90.6966    | -96.8365   | 656151.2420 | -20.1712  |
| -20.1552               |             |            |             |           |
| [926]ENERGY: 13140000  | 3195.9109   | 5190.1507  | 5310.2061   |           |
| 336.4091               | -15779.2059 | -1823.4280 | 0.0000      | 0.0000    |
| 7677.8472              | 4107.8902   | 307.1523   | -3569.9570  | 4169.3604 |
| 308.4095               | -102.2882   | -164.8239  | 656151.2420 | -20.5798  |
| -20.5933               |             |            |             |           |
| [976]ENERGY: 13150000  | 3175.5947   | 5265.6010  | 5335.9556   |           |
| 327.8425               | -15877.5770 | -1784.9794 | 0.0000      | 0.0000    |
| 7664.8265              | 4107.2638   | 306.6314   | -3557.5627  | 4169.5056 |
| 308.4962               | -116.3431   | -122.6509  | 656151.2420 | -19.4878  |
| -19.4774               |             |            |             |           |
| [1012]ENERGY: 13160000 | 3194.1939   | 5252.3155  | 5351.9033   |           |
| 348.4146               | -15873.4168 | -1831.4167 | 0.0000      | 0.0000    |
| 7663.0566              | 4105.0504   | 306.5606   | -3558.0061  | 4169.6211 |
| 308.5872               | 9.6826      | -65.0318   | 656151.2420 | -18.9675  |
| -18.9525               |             |            |             |           |
| [1062]ENERGY: 13170000 | 3074.5009   | 5332.0350  | 5234.9213   |           |
| 353.2200               | -15867.4695 | -1738.9619 | 0.0000      | 0.0000    |
| 7716.1117              | 4104.3575   | 308.6830   | -3611.7542  | 4169.5635 |
| 308.6222               | 79.1424     | 97.2080    | 656151.2420 | -19.5286  |
| -19.5372               |             |            |             |           |
| [1098]ENERGY: 13180000 | 3130.7192   | 5169.4421  | 5267.0540   |           |
| 339.3334               | -15823.4306 | -1707.4329 | 0.0000      | 0.0000    |
| 7733.6322              | 4109.3175   | 309.3840   | -3624.3148  | 4169.4669 |
| 308.7194               | 232.8941    | 167.3217   | 656151.2420 | -22.1534  |
| -22.1698               |             |            |             |           |
| [1148]ENERGY: 13190000 | 3169.5789   | 5222.2126  | 5230.0967   |           |
| 351.0638               | -15790.8317 | -1766.8497 | 0.0000      | 0.0000    |
| 7695.2645              | 4110.5351   | 307.8491   | -3584.7294  | 4170.6198 |
| 308.4946               | -94.7057    | -53.7570   | 656151.2420 | -18.7879  |
| -18.7637               |             |            |             |           |
| [1187]ENERGY: 13200000 | 3167.0161   | 5156.1845  | 5269.3947   |           |
| 353.3055               | -15853.3639 | -1682.7579 | 0.0000      | 0.0000    |
| 7701.0547              | 4110.8336   | 308.0807   | -3590.2210  | 4170.4603 |
| 308.2942               | 91.2316     | 5.6296     | 656151.2420 | -24.2936  |
| -24.3129               |             |            |             |           |
| [1237]ENERGY: 13210000 | 3159.3928   | 5181.1258  | 5297.4335   |           |

## Supplementary Text 6

|                        |             |            |             |           |
|------------------------|-------------|------------|-------------|-----------|
| 323.5394               | -15815.0488 | -1769.8481 | 0.0000      | 0.0000    |
| 7730.2503              | 4106.8450   | 309.2487   | -3623.4054  | 4169.9410 |
| 308.4218               | -36.5855    | -12.6324   | 656151.2420 | -20.2714  |
| -20.2636               |             |            |             |           |
| [1273]ENERGY: 13220000 | 3210.5647   | 5138.0718  | 5269.6540   |           |
| 346.4476               | -15839.1975 | -1759.2414 | 0.0000      | 0.0000    |
| 7741.4970              | 4107.7962   | 309.6986   | -3633.7008  | 4170.0344 |
| 308.1146               | 81.9716     | 74.5154    | 656151.2420 | -20.2497  |
| -20.2350               |             |            |             |           |
| [1323]ENERGY: 13230000 | 3289.1389   | 5194.8351  | 5255.7540   |           |
| 327.7024               | -15846.4984 | -1796.7703 | 0.0000      | 0.0000    |
| 7684.8378              | 4108.9995   | 307.4319   | -3575.8382  | 4171.0714 |
| 308.2604               | -149.2590   | -131.8218  | 656151.2420 | -19.3383  |
| -19.3378               |             |            |             |           |
| [1359]ENERGY: 13240000 | 3234.3894   | 5123.1888  | 5278.3335   |           |
| 361.5268               | -15849.4453 | -1745.7708 | 0.0000      | 0.0000    |
| 7703.8200              | 4106.0423   | 308.1913   | -3597.7776  | 4170.7580 |
| 308.3327               | 70.4202     | 55.7934    | 656151.2420 | -20.5135  |
| -20.5368               |             |            |             |           |
| [1409]ENERGY: 13250000 | 3228.4414   | 5197.1673  | 5310.2638   |           |
| 343.6477               | -15835.4736 | -1750.9256 | 0.0000      | 0.0000    |
| 7616.9211              | 4110.0422   | 304.7149   | -3506.8789  | 4170.8838 |
| 308.3766               | 19.7541     | -42.7591   | 656151.2420 | -23.7315  |
| -23.7124               |             |            |             |           |
| [1445]ENERGY: 13260000 | 3181.5606   | 5260.7249  | 5229.9919   |           |
| 328.5916               | -15853.4873 | -1754.0449 | 0.0000      | 0.0000    |
| 7716.5741              | 4109.9111   | 308.7015   | -3606.6630  | 4171.3435 |
| 308.5762               | 77.2690     | 38.5039    | 656151.2420 | -19.5000  |
| -19.5078               |             |            |             |           |
| [1495]ENERGY: 13270000 | 3179.2824   | 5279.5501  | 5275.5982   |           |
| 339.3263               | -15907.9827 | -1739.3876 | 0.0000      | 0.0000    |
| 7681.3042              | 4107.6908   | 307.2906   | -3573.6134  | 4171.0297 |
| 308.6091               | -38.5997    | -104.2186  | 656151.2420 | -20.8769  |
| -20.8902               |             |            |             |           |
| [1531]ENERGY: 13280000 | 3176.6654   | 5243.1721  | 5244.9917   |           |
| 338.8113               | -15832.6830 | -1770.9647 | 0.0000      | 0.0000    |
| 7711.9018              | 4111.8946   | 308.5146   | -3600.0071  | 4170.6834 |
| 308.8069               | -72.1746    | -58.0185   | 656151.2420 | -17.7732  |
| -17.7496               |             |            |             |           |
| [1581]ENERGY: 13290000 | 3137.3053   | 5181.7158  | 5313.2333   |           |
| 351.1339               | -15886.0623 | -1724.0734 | 0.0000      | 0.0000    |
| 7735.7972              | 4109.0497   | 309.4706   | -3626.7475  | 4170.9658 |
| 308.6741               | 34.1831     | -52.8406   | 656151.2420 | -16.5872  |
| -16.6011               |             |            |             |           |
| [1620]ENERGY: 13300000 | 3225.5984   | 5278.7056  | 5310.6260   |           |
| 341.3424               | -15881.6047 | -1756.2244 | 0.0000      | 0.0000    |
| 7595.1901              | 4113.6333   | 303.8456   | -3481.5568  | 4171.5218 |
| 308.8214               | 63.2158     | 26.2143    | 656151.2420 | -20.4239  |
| -20.4351               |             |            |             |           |
| [1670]ENERGY: 13310000 | 3160.2125   | 5195.7954  | 5255.9665   |           |
| 351.9936               | -15862.4000 | -1719.3640 | 0.0000      | 0.0000    |
| 7725.3229              | 4107.5268   | 309.0515   | -3617.7960  | 4170.2535 |
| 308.7046               | -48.0717    | -43.9824   | 656151.2420 | -24.5565  |
| -24.5371               |             |            |             |           |

## Supplementary Text 6

|                        |             |            |             |           |
|------------------------|-------------|------------|-------------|-----------|
| [1706]ENERGY: 13320000 | 3143.1474   | 5145.4957  | 5283.2196   |           |
| 330.5857               | -15770.8044 | -1789.1176 | 0.0000      | 0.0000    |
| 7768.9067              | 4111.4331   | 310.7951   | -3657.4736  | 4172.3593 |
| 308.7237               | 47.3115     | 37.2547    | 656151.2420 | -16.4642  |
| -16.4796               |             |            |             |           |
| [1756]ENERGY: 13330000 | 3187.7385   | 5267.6240  | 5297.8437   |           |
| 319.7058               | -15911.0853 | -1762.3056 | 0.0000      | 0.0000    |
| 7708.9592              | 4108.4804   | 308.3969   | -3600.4788  | 4172.8740 |
| 308.8503               | -42.0075    | -87.9090   | 656151.2420 | -23.2485  |
| -23.2456               |             |            |             |           |
| [1792]ENERGY: 13340000 | 3185.5181   | 5221.9621  | 5258.2633   |           |
| 345.7574               | -15849.2971 | -1821.7421 | 0.0000      | 0.0000    |
| 7767.8103              | 4108.2719   | 310.7512   | -3659.5383  | 4172.5639 |
| 308.8420               | -75.5247    | -71.1211   | 656151.2420 | -22.9978  |
| -22.9920               |             |            |             |           |
| [1842]ENERGY: 13350000 | 3232.9504   | 5149.5415  | 5218.8801   |           |
| 372.0723               | -15833.4812 | -1738.2988 | 0.0000      | 0.0000    |
| 7710.6764              | 4112.3407   | 308.4656   | -3598.3357  | 4173.2104 |
| 308.7810               | 16.7253     | 88.3196    | 656151.2420 | -18.4974  |
| -18.5111               |             |            |             |           |
| [1878]ENERGY: 13360000 | 3198.3295   | 5309.1725  | 5259.4214   |           |
| 345.2739               | -15845.0962 | -1781.4230 | 0.0000      | 0.0000    |
| 7627.7216              | 4113.3997   | 305.1470   | -3514.3220  | 4173.3688 |
| 308.6697               | 4.4729      | 17.4526    | 656151.2420 | -14.9054  |
| -14.8971               |             |            |             |           |
| [1928]ENERGY: 13370000 | 3192.2036   | 5266.5202  | 5245.7546   |           |
| 336.2965               | -15821.1438 | -1861.9119 | 0.0000      | 0.0000    |
| 7754.8703              | 4112.5895   | 310.2336   | -3642.2808  | 4174.6400 |
| 308.7040               | -189.2374   | -121.2531  | 656151.2420 | -14.4339  |
| -14.4157               |             |            |             |           |
| [1964]ENERGY: 13380000 | 3161.0041   | 5252.9691  | 5286.1280   |           |
| 349.5050               | -15826.6365 | -1765.7135 | 0.0000      | 0.0000    |
| 7657.0392              | 4114.2955   | 306.3199   | -3542.7438  | 4174.9802 |
| 308.6470               | -84.1723    | -55.3601   | 656151.2420 | -15.7793  |
| -15.7939               |             |            |             |           |
| [2014]ENERGY: 13390000 | 3230.8394   | 5139.6880  | 5241.6588   |           |
| 335.0422               | -15770.8021 | -1766.9923 | 0.0000      | 0.0000    |
| 7701.8482              | 4111.2822   | 308.1124   | -3590.5660  | 4174.9921 |
| 308.6512               | -23.6619    | -47.1545   | 656151.2420 | -13.3139  |
| -13.3101               |             |            |             |           |
| [2053]ENERGY: 13400000 | 3258.6863   | 5249.2735  | 5283.2447   |           |
| 350.1893               | -15931.7179 | -1767.6506 | 0.0000      | 0.0000    |
| 7670.6531              | 4112.6784   | 306.8645   | -3557.9747  | 4175.2515 |
| 308.7733               | -22.6826    | -2.0164    | 656151.2420 | -18.6494  |
| -18.6487               |             |            |             |           |
| [2103]ENERGY: 13410000 | 3205.9862   | 5294.9626  | 5221.5002   |           |
| 326.3722               | -15906.2384 | -1760.2249 | 0.0000      | 0.0000    |
| 7730.9570              | 4113.3149   | 309.2769   | -3617.6421  | 4173.9392 |
| 309.0206               | 217.9411    | 85.6053    | 656151.2420 | -18.4619  |
| -18.4606               |             |            |             |           |
| [2139]ENERGY: 13420000 | 3198.9811   | 5254.3173  | 5285.3672   |           |
| 348.3272               | -15838.5078 | -1796.0151 | 0.0000      | 0.0000    |
| 7663.4614              | 4115.9312   | 306.5768   | -3547.5302  | 4174.7834 |
| 308.9053               | -147.3566   | -112.8391  | 656151.2420 | -12.0706  |

Supplementary Text 6

-12.0943  
 [2189]ENERGY: 13430000      3247.9968      5205.4587      5276.9785  
 340.3364      -15915.7718      -1727.7900      0.0000      0.0000  
 7685.8413      4113.0499      307.4721      -3572.7914      4173.3427  
 308.9447      34.7678      3.7460      656151.2420      -19.6386  
 -19.6279  
 [2225]ENERGY: 13440000      3164.1275      5300.1939      5273.5597  
 334.7047      -15869.9883      -1761.2449      0.0000      0.0000  
 7670.5414      4111.8939      306.8600      -3558.6475      4173.8207  
 308.7770      78.8943      73.7256      656151.2420      -17.5334  
 -17.5203  
 [2275]ENERGY: 13450000      3201.0613      5312.8080      5239.1347  
 348.1793      -15914.8198      -1817.5982      0.0000      0.0000  
 7741.4393      4110.2046      309.6963      -3631.2346      4174.0611  
 308.7280      -131.3309      -110.9023      656151.2420      -11.8281  
 -11.8420  
 [2311]ENERGY: 13460000      3183.4912      5159.6317      5275.8799  
 296.7533      -15773.0519      -1774.7103      0.0000      0.0000  
 7742.7247      4110.7186      309.7477      -3632.0061      4174.5997  
 308.8648      209.8748      108.2280      656151.2420      -15.5518  
 -15.5661  
 [2361]ENERGY: 13470000      3264.7359      5272.8501      5211.5354  
 342.8631      -15886.7273      -1778.2133      0.0000      0.0000  
 7687.7036      4114.7475      307.5466      -3572.9561      4175.2638  
 308.7166      -159.1899      -114.2008      656151.2420      -18.5535  
 -18.5212  
 [2397]ENERGY: 13480000      3169.7767      5222.1456      5248.1380  
 344.5181      -15836.3090      -1783.3608      0.0000      0.0000  
 7746.3888      4111.2975      309.8943      -3635.0914      4174.8574  
 308.9391      99.5296      99.8787      656151.2420      -12.0987  
 -12.1175  
 [2447]ENERGY: 13490000      3262.0438      5246.5639      5231.0218  
 346.5043      -15857.4901      -1790.0390      0.0000      0.0000  
 7673.7982      4112.4029      306.9903      -3561.3953      4175.4110  
 308.8775      -101.3850      -146.9543      656151.2420      -15.0873  
 -15.0724  
 [2486]ENERGY: 13500000      3279.6901      5200.1724      5227.4499  
 323.4507      -15804.3385      -1845.4873      0.0000      0.0000  
 7734.2876      4115.2249      309.4102      -3619.0626      4175.4595  
 308.8284      -109.0421      -130.5288      656151.2420      -17.6619  
 -17.6909  
 [2536]ENERGY: 13510000      3175.0447      5242.5129      5268.9224  
 342.2747      -15844.5354      -1780.3468      0.0000      0.0000  
 7711.2020      4115.0746      308.4866      -3596.1275      4175.1424  
 308.6676      147.6775      89.1865      656151.2420      -10.8903  
 -10.8608  
 [2572]ENERGY: 13520000      3192.7086      5249.5045      5236.5217  
 315.6242      -15786.6486      -1807.9042      0.0000      0.0000  
 7712.8664      4112.6727      308.5532      -3600.1938      4175.5312  
 308.7411      53.9616      35.7773      656151.2420      -16.7587  
 -16.7471  
 [2622]ENERGY: 13530000      3202.6513      5180.4791      5281.3411  
 351.4857      -15859.4539      -1739.9178      0.0000      0.0000  
 7696.6957      4113.2811      307.9063      -3583.4146      4174.5160

## Supplementary Text 6

|                        |             |            |             |           |
|------------------------|-------------|------------|-------------|-----------|
| 308.6732               | -0.7413     | -31.6768   | 656151.2420 | -14.4103  |
| -14.4387               |             |            |             |           |
| [2658]ENERGY: 13540000 | 3147.8738   | 5168.4968  | 5274.2852   |           |
| 345.2393               | -15775.8364 | -1732.8525 | 0.0000      | 0.0000    |
| 7685.1010              | 4112.3073   | 307.4425   | -3572.7938  | 4174.3525 |
| 308.8249               | 70.8417     | 70.4866    | 656151.2420 | -13.1408  |
| -13.1353               |             |            |             |           |
| [2708]ENERGY: 13550000 | 3155.8350   | 5240.8759  | 5219.9815   |           |
| 316.2312               | -15794.0048 | -1761.5748 | 0.0000      | 0.0000    |
| 7734.9814              | 4112.3255   | 309.4379   | -3622.6560  | 4175.8755 |
| 308.7164               | -8.9604     | 6.9367     | 656151.2420 | -16.4525  |
| -16.4335               |             |            |             |           |
| [2744]ENERGY: 13560000 | 3238.0406   | 5216.2739  | 5212.5165   |           |
| 324.9865               | -15731.0809 | -1826.9314 | 0.0000      | 0.0000    |
| 7683.7528              | 4117.5581   | 307.3885   | -3566.1947  | 4177.0497 |
| 309.2258               | -63.3262    | -36.0713   | 656151.2420 | -17.2768  |
| -17.2896               |             |            |             |           |
| [2794]ENERGY: 13570000 | 3217.8488   | 5182.6680  | 5262.3820   |           |
| 317.1749               | -15847.1364 | -1746.2867 | 0.0000      | 0.0000    |
| 7729.2363              | 4115.8868   | 309.2081   | -3613.3495  | 4176.8477 |
| 309.1115               | 114.4898    | 73.5608    | 656151.2420 | -12.6942  |
| -12.7000               |             |            |             |           |
| [2830]ENERGY: 13580000 | 3148.8749   | 5271.2119  | 5295.9062   |           |
| 353.3621               | -15967.4655 | -1722.8202 | 0.0000      | 0.0000    |
| 7735.3295              | 4114.3988   | 309.4519   | -3620.9306  | 4176.4244 |
| 309.0968               | 138.0941    | 83.0807    | 656151.2420 | -15.5171  |
| -15.5200               |             |            |             |           |
| [2880]ENERGY: 13590000 | 3258.4037   | 5211.3384  | 5313.4522   |           |
| 348.1888               | -15880.6774 | -1789.4738 | 0.0000      | 0.0000    |
| 7654.4956              | 4115.7276   | 306.2181   | -3538.7681  | 4177.1277 |
| 309.2037               | -35.2996    | -104.7651  | 656151.2420 | -17.7022  |
| -17.7145               |             |            |             |           |
| [2919]ENERGY: 13600000 | 3284.5264   | 5230.9634  | 5221.1233   |           |
| 350.4187               | -15931.3597 | -1748.3172 | 0.0000      | 0.0000    |
| 7708.6491              | 4116.0040   | 308.3845   | -3592.6451  | 4177.1627 |
| 309.1598               | -61.0425    | -43.8476   | 656151.2420 | -14.9240  |
| -14.9105               |             |            |             |           |
| [2969]ENERGY: 13610000 | 3164.6681   | 5186.5507  | 5274.5148   |           |
| 359.8289               | -15861.9022 | -1725.1914 | 0.0000      | 0.0000    |
| 7718.5467              | 4117.0157   | 308.7805   | -3601.5310  | 4176.6561 |
| 309.1156               | 143.1671    | 80.5176    | 656151.2420 | -16.5580  |
| -16.5530               |             |            |             |           |
| [3005]ENERGY: 13620000 | 3252.5246   | 5265.5753  | 5267.1715   |           |
| 339.0656               | -15929.0714 | -1823.8349 | 0.0000      | 0.0000    |
| 7744.4175              | 4115.8482   | 309.8154   | -3628.5693  | 4176.9029 |
| 309.1468               | 79.0005     | -54.5251   | 656151.2420 | -14.8506  |
| -14.8376               |             |            |             |           |
| [3055]ENERGY: 13630000 | 3190.2537   | 5184.4690  | 5248.1123   |           |
| 359.3307               | -15856.8878 | -1757.4849 | 0.0000      | 0.0000    |
| 7746.6982              | 4114.4912   | 309.9067   | -3632.2070  | 4177.3894 |
| 309.0122               | 39.9587     | 77.3180    | 656151.2420 | -13.8623  |
| -13.8783               |             |            |             |           |
| [3091]ENERGY: 13640000 | 3177.0564   | 5250.0924  | 5311.2248   |           |
| 352.7305               | -15877.0426 | -1761.5561 | 0.0000      | 0.0000    |

## Supplementary Text 6

|                        |             |            |             |           |
|------------------------|-------------|------------|-------------|-----------|
| 7664.6394              | 4117.1449   | 306.6239   | -3547.4945  | 4177.8674 |
| 309.1114               | 50.4491     | -18.8109   | 656151.2420 | -14.6885  |
| -14.6896               |             |            |             |           |
| [3141]ENERGY: 13650000 | 3213.0586   | 5205.9698  | 5223.3391   |           |
| 329.6677               | -15815.4349 | -1763.5719 | 0.0000      | 0.0000    |
| 7721.9481              | 4114.9764   | 308.9165   | -3606.9716  | 4177.3140 |
| 309.0906               | -71.9631    | -77.3424   | 656151.2420 | -14.1849  |
| -14.1757               |             |            |             |           |
| [3177]ENERGY: 13660000 | 3145.7284   | 5284.6295  | 5249.0319   |           |
| 339.1040               | -15785.8910 | -1864.8779 | 0.0000      | 0.0000    |
| 7744.6868              | 4112.4116   | 309.8262   | -3632.2752  | 4177.1719 |
| 309.0930               | -150.2011   | -190.8600  | 656151.2420 | -19.0836  |
| -19.0850               |             |            |             |           |
| [3227]ENERGY: 13670000 | 3211.3181   | 5267.1322  | 5206.2698   |           |
| 324.9417               | -15807.4916 | -1770.1614 | 0.0000      | 0.0000    |
| 7685.4349              | 4117.4437   | 307.4558   | -3567.9912  | 4176.6139 |
| 309.0341               | 104.8763    | -2.7312    | 656151.2420 | -14.3796  |
| -14.3938               |             |            |             |           |
| [3263]ENERGY: 13680000 | 3116.2744   | 5210.2295  | 5263.1456   |           |
| 362.0196               | -15859.2705 | -1752.1844 | 0.0000      | 0.0000    |
| 7771.6123              | 4111.8265   | 310.9033   | -3659.7858  | 4177.7977 |
| 308.9330               | 67.1193     | 21.7565    | 656151.2420 | -13.4431  |
| -13.4422               |             |            |             |           |
| [3313]ENERGY: 13690000 | 3124.6406   | 5168.3221  | 5244.8943   |           |
| 332.8220               | -15813.2507 | -1707.0929 | 0.0000      | 0.0000    |
| 7762.7221              | 4113.0576   | 310.5477   | -3649.6645  | 4177.7671 |
| 308.8005               | 66.8800     | -38.8201   | 656151.2420 | -16.0599  |
| -16.0567               |             |            |             |           |
| [3352]ENERGY: 13700000 | 3224.7036   | 5225.3627  | 5268.2560   |           |
| 349.6767               | -15878.5056 | -1746.8877 | 0.0000      | 0.0000    |
| 7671.6907              | 4114.2962   | 306.9060   | -3557.3944  | 4176.5429 |
| 308.6923               | -80.3856    | -54.9976   | 656151.2420 | -17.2611  |
| -17.2510               |             |            |             |           |
| [3402]ENERGY: 13710000 | 3232.5854   | 5210.5655  | 5244.4635   |           |
| 345.3087               | -15837.2425 | -1769.3405 | 0.0000      | 0.0000    |
| 7686.6669              | 4113.0068   | 307.5051   | -3573.6601  | 4177.5041 |
| 308.5846               | -36.7910    | -6.3826    | 656151.2420 | -17.2512  |
| -17.2603               |             |            |             |           |
| [3438]ENERGY: 13720000 | 3114.0425   | 5254.7826  | 5259.3017   |           |
| 341.2838               | -15859.5877 | -1751.8038 | 0.0000      | 0.0000    |
| 7757.8645              | 4115.8837   | 310.3534   | -3641.9808  | 4178.3809 |
| 308.6934               | 43.8764     | 2.1482     | 656151.2420 | -15.6933  |
| -15.6891               |             |            |             |           |
| [3488]ENERGY: 13730000 | 3217.1627   | 5337.5902  | 5179.4114   |           |
| 357.1962               | -15841.5373 | -1816.6371 | 0.0000      | 0.0000    |
| 7685.6825              | 4118.8686   | 307.4657   | -3566.8139  | 4178.2865 |
| 308.8213               | -56.9230    | -68.2727   | 656151.2420 | -15.1686  |
| -15.1891               |             |            |             |           |
| [3524]ENERGY: 13740000 | 3117.0804   | 5249.1179  | 5268.4058   |           |
| 339.9655               | -15722.5916 | -1767.9695 | 0.0000      | 0.0000    |
| 7634.1544              | 4118.1630   | 305.4043   | -3515.9914  | 4177.6234 |
| 308.7848               | -47.8096    | -23.8180   | 656151.2420 | -16.1254  |
| -16.0902               |             |            |             |           |
| [3574]ENERGY: 13750000 | 3138.9027   | 5208.3960  | 5267.3559   |           |



## Supplementary Text 6

|                        |             |            |             |           |
|------------------------|-------------|------------|-------------|-----------|
| 336.2432               | -15822.4747 | -1750.7231 | 0.0000      | 0.0000    |
| 7739.1482              | 4116.8481   | 309.6046   | -3622.3001  | 4178.8555 |
| 308.9070               | 177.9376    | 90.2034    | 656151.2420 | -18.9845  |
| -18.9968               |             |            |             |           |
| [3610]ENERGY: 13760000 | 3181.0354   | 5308.2398  | 5228.6217   |           |
| 308.9971               | -15765.9953 | -1825.2369 | 0.0000      | 0.0000    |
| 7682.5477              | 4118.2095   | 307.3403   | -3564.3382  | 4178.1769 |
| 308.9264               | -142.3575   | -52.7472   | 656151.2420 | -13.1447  |
| -13.1328               |             |            |             |           |
| [3660]ENERGY: 13770000 | 3147.3033   | 5261.0209  | 5310.1901   |           |
| 308.6025               | -15811.4373 | -1813.2956 | 0.0000      | 0.0000    |
| 7715.9627              | 4118.3467   | 308.6771   | -3597.6160  | 4179.1537 |
| 308.8907               | 130.0995    | 76.7140    | 656151.2420 | -15.3503  |
| -15.3746               |             |            |             |           |
| [3696]ENERGY: 13780000 | 3271.7646   | 5210.8221  | 5290.5411   |           |
| 347.7449               | -16021.4190 | -1712.4830 | 0.0000      | 0.0000    |
| 7728.7860              | 4115.7567   | 309.1901   | -3613.0293  | 4178.9306 |
| 308.8653               | 74.1552     | 37.7207    | 656151.2420 | -18.3846  |
| -18.3826               |             |            |             |           |
| [3746]ENERGY: 13790000 | 3218.4934   | 5234.3545  | 5281.3641   |           |
| 327.0837               | -15794.9927 | -1864.3678 | 0.0000      | 0.0000    |
| 7714.8393              | 4116.7744   | 308.6321   | -3598.0649  | 4179.1775 |
| 308.9491               | -134.7618   | -140.1016  | 656151.2420 | -18.2789  |
| -18.2743               |             |            |             |           |
| [3785]ENERGY: 13800000 | 3158.8375   | 5223.7631  | 5249.7883   |           |
| 323.2918               | -15796.0762 | -1772.0291 | 0.0000      | 0.0000    |
| 7732.2624              | 4119.8378   | 309.3292   | -3612.4246  | 4180.0550 |
| 308.9495               | -67.0861    | -15.5448   | 656151.2420 | -17.1503  |
| -17.1484               |             |            |             |           |
| [3835]ENERGY: 13810000 | 3216.4077   | 5218.8370  | 5220.1693   |           |
| 339.8094               | -15804.1554 | -1797.5105 | 0.0000      | 0.0000    |
| 7723.6345              | 4117.1921   | 308.9840   | -3606.4425  | 4181.5188 |
| 309.1358               | 34.5440     | -79.3469   | 656151.2420 | -18.2412  |
| -18.2452               |             |            |             |           |
| [3871]ENERGY: 13820000 | 3154.3025   | 5204.6347  | 5297.3292   |           |
| 343.8053               | -15821.5677 | -1776.3540 | 0.0000      | 0.0000    |
| 7717.0899              | 4119.2399   | 308.7222   | -3597.8501  | 4180.8470 |
| 309.1641               | 165.0149    | 19.1672    | 656151.2420 | -18.4232  |
| -18.4229               |             |            |             |           |
| [3921]ENERGY: 13830000 | 3185.0311   | 5217.8429  | 5238.1614   |           |
| 336.0002               | -15867.6375 | -1747.6285 | 0.0000      | 0.0000    |
| 7759.7328              | 4121.5025   | 310.4281   | -3638.2303  | 4181.5337 |
| 308.8551               | 83.0666     | 103.6440   | 656151.2420 | -15.4105  |
| -15.4063               |             |            |             |           |
| [3957]ENERGY: 13840000 | 3158.8018   | 5212.1917  | 5336.8186   |           |
| 349.9853               | -15886.4139 | -1750.6246 | 0.0000      | 0.0000    |
| 7697.9370              | 4118.6960   | 307.9560   | -3579.2410  | 4179.9374 |
| 308.8162               | 21.8530     | 53.2508    | 656151.2420 | -17.9306  |
| -17.9241               |             |            |             |           |
| [4007]ENERGY: 13850000 | 3158.7151   | 5171.9146  | 5311.9205   |           |
| 354.8339               | -15856.2758 | -1728.9961 | 0.0000      | 0.0000    |
| 7707.2107              | 4119.3228   | 308.3270   | -3587.8879  | 4181.1115 |
| 308.9756               | -77.3710    | -79.1702   | 656151.2420 | -21.0502  |
| -21.0445               |             |            |             |           |

## Supplementary Text 6

|                        |             |            |             |           |
|------------------------|-------------|------------|-------------|-----------|
| [4043]ENERGY: 13860000 | 3199.5928   | 5166.9288  | 5229.6922   |           |
| 316.6822               | -15758.5761 | -1780.0143 | 0.0000      | 0.0000    |
| 7749.9897              | 4124.2954   | 310.0383   | -3625.6943  | 4182.2276 |
| 308.9343               | -42.7593    | -19.7091   | 656151.2420 | -12.6486  |
| -12.6621               |             |            |             |           |
| [4093]ENERGY: 13870000 | 3166.1547   | 5285.0246  | 5282.5283   |           |
| 326.0734               | -15882.8763 | -1769.1450 | 0.0000      | 0.0000    |
| 7713.2580              | 4121.0178   | 308.5689   | -3592.2403  | 4183.4229 |
| 309.0736               | -58.3473    | -34.1411   | 656151.2420 | -18.3789  |
| -18.3859               |             |            |             |           |
| [4129]ENERGY: 13880000 | 3227.8106   | 5232.1374  | 5205.5626   |           |
| 335.6330               | -15879.0376 | -1778.7885 | 0.0000      | 0.0000    |
| 7774.8391              | 4118.1565   | 311.0324   | -3656.6826  | 4183.1710 |
| 309.0526               | -16.3421    | -69.4060   | 656151.2420 | -14.6413  |
| -14.6366               |             |            |             |           |
| [4179]ENERGY: 13890000 | 3180.3619   | 5181.2979  | 5281.5529   |           |
| 345.2285               | -15800.9450 | -1776.3910 | 0.0000      | 0.0000    |
| 7715.3005              | 4126.4057   | 308.6506   | -3588.8948  | 4183.6094 |
| 309.0633               | 78.5443     | 75.5864    | 656151.2420 | -15.8078  |
| -15.8002               |             |            |             |           |
| [4218]ENERGY: 13900000 | 3186.6877   | 5153.9938  | 5254.3806   |           |
| 332.2089               | -15842.3462 | -1746.9265 | 0.0000      | 0.0000    |
| 7783.7847              | 4121.7830   | 311.3903   | -3662.0017  | 4184.1445 |
| 309.0264               | 75.3544     | -28.9120   | 656151.2420 | -15.0542  |
| -15.0626               |             |            |             |           |
| [4268]ENERGY: 13910000 | 3260.7090   | 5246.4834  | 5275.8191   |           |
| 336.5479               | -15851.0227 | -1817.3331 | 0.0000      | 0.0000    |
| 7674.4169              | 4125.6205   | 307.0150   | -3548.7964  | 4185.4798 |
| 308.9961               | 55.8214     | 6.8357     | 656151.2420 | -15.8128  |
| -15.8078               |             |            |             |           |
| [4304]ENERGY: 13920000 | 3174.6848   | 5215.2226  | 5255.8138   |           |
| 330.7970               | -15873.0018 | -1737.1701 | 0.0000      | 0.0000    |
| 7752.0387              | 4118.3850   | 310.1203   | -3633.6537  | 4183.9741 |
| 309.0718               | -5.8903     | 41.4298    | 656151.2420 | -14.2137  |
| -14.1985               |             |            |             |           |
| [4354]ENERGY: 13930000 | 3201.7957   | 5372.7967  | 5231.4451   |           |
| 323.1804               | -15895.1202 | -1830.9647 | 0.0000      | 0.0000    |
| 7716.1463              | 4119.2792   | 308.6844   | -3596.8671  | 4185.8699 |
| 308.9669               | -140.3993   | -154.5807  | 656151.2420 | -15.6719  |
| -15.6870               |             |            |             |           |
| [4390]ENERGY: 13940000 | 3143.9047   | 5291.0973  | 5276.1107   |           |
| 351.3267               | -15790.0082 | -1856.1734 | 0.0000      | 0.0000    |
| 7707.1365              | 4123.3942   | 308.3240   | -3583.7422  | 4185.4216 |
| 309.0587               | -53.1052    | -86.4574   | 656151.2420 | -12.0373  |
| -12.0330               |             |            |             |           |
| [4440]ENERGY: 13950000 | 3237.9374   | 5192.6943  | 5242.3252   |           |
| 314.2025               | -15882.8048 | -1733.8443 | 0.0000      | 0.0000    |
| 7750.0905              | 4120.6008   | 310.0424   | -3629.4897  | 4184.6263 |
| 308.8605               | -80.6271    | -140.7353  | 656151.2420 | -15.5506  |
| -15.5669               |             |            |             |           |
| [4476]ENERGY: 13960000 | 3220.2517   | 5194.1246  | 5277.4923   |           |
| 342.9906               | -15863.0200 | -1758.0152 | 0.0000      | 0.0000    |
| 7708.9615              | 4122.7854   | 308.3970   | -3586.1760  | 4185.7411 |
| 309.0220               | -84.7172    | -110.6006  | 656151.2420 | -13.3733  |

Supplementary Text 6

-13.3591  
 [4526]ENERGY: 13970000      3286.6847      5210.1509      5259.8565  
 341.1823      -15810.2355      -1754.5992      0.0000      0.0000  
 7591.4815      4124.5212      303.6972      -3466.9603      4185.0105  
 309.2058      -63.6314      -77.6545      656151.2420      -17.7814  
 -17.7780  
 [4562]ENERGY: 13980000      3195.5175      5240.3387      5238.8091  
 336.5088      -15800.3463      -1824.2977      0.0000      0.0000  
 7737.8565      4124.3866      309.5529      -3613.4700      4185.1348  
 309.0858      -132.4764      -157.0889      656151.2420      -16.9664  
 -16.9692  
 [4612]ENERGY: 13990000      3182.7859      5294.0687      5278.7556  
 346.3580      -15797.8469      -1737.1205      0.0000      0.0000  
 7561.6632      4128.6639      302.5043      -3432.9993      4186.6465  
 309.0064      181.4858      173.2635      656151.2420      -13.4591  
 -13.4693  
 [4651]ENERGY: 14000000      3130.8038      5238.0015      5305.7121  
 328.7077      -15874.3894      -1799.7096      0.0000      0.0000  
 7795.1537      4124.2798      311.8451      -3670.8739      4187.2419  
 308.9899      -45.0615      -95.1919      656151.2420      -14.6462  
 -14.6281  
 [4701]ENERGY: 14010000      3168.3766      5202.6711      5258.9017  
 326.0845      -15799.8887      -1778.4099      0.0000      0.0000  
 7743.4882      4121.2236      309.7782      -3622.2647      4185.8406  
 308.9151      57.5294      68.3367      656151.2420      -14.0547  
 -14.0528  
 [4737]ENERGY: 14020000      3160.5539      5179.8774      5277.4060  
 372.5947      -15818.1133      -1753.1331      0.0000      0.0000  
 7704.6442      4123.8298      308.2243      -3580.8144      4185.5210  
 309.0998      42.6301      25.4852      656151.2420      -12.1865  
 -12.2096  
 [4787]ENERGY: 14030000      3194.7229      5221.0484      5272.8563  
 325.2708      -15878.6838      -1809.5571      0.0000      0.0000  
 7795.2067      4120.8642      311.8472      -3674.3425      4184.5324  
 309.1262      -185.7926      -95.3613      656151.2420      -18.1985  
 -18.1930  
 [4823]ENERGY: 14040000      3215.9267      5260.8042      5262.4723  
 340.0132      -15906.6766      -1766.4715      0.0000      0.0000  
 7716.1947      4122.2630      308.6864      -3593.9317      4185.6040  
 308.9487      140.3411      57.3396      656151.2420      -19.0128  
 -19.0095  
 [4873]ENERGY: 14050000      3169.8174      5216.4413      5288.0086  
 373.8309      -15907.6027      -1778.2444      0.0000      0.0000  
 7758.9562      4121.2072      310.3970      -3637.7490      4186.0427  
 309.1097      59.9407      -11.6213      656151.2420      -12.4704  
 -12.4616  
 [4909]ENERGY: 14060000      3160.9463      5119.7532      5246.4801  
 339.7796      -15759.6774      -1790.6979      0.0000      0.0000  
 7805.3349      4121.9188      312.2524      -3683.4161      4184.7259  
 309.3209      -37.0361      -50.2426      656151.2420      -18.4585  
 -18.4682  
 [4959]ENERGY: 14070000      3204.4152      5216.3817      5221.3157  
 335.5733      -15827.6744      -1779.3039      0.0000      0.0000  
 7752.1017      4122.8092      310.1228      -3629.2924      4184.9446

## Supplementary Text 6

|                        |             |            |             |           |
|------------------------|-------------|------------|-------------|-----------|
| 309.3411               | 48.4211     | 37.9292    | 656151.2420 | -18.9322  |
| -18.9190               |             |            |             |           |
| [4995]ENERGY: 14080000 | 3188.5674   | 5214.0124  | 5246.4965   |           |
| 346.7356               | -15814.4580 | -1758.8460 | 0.0000      | 0.0000    |
| 7703.2740              | 4125.7819   | 308.1695   | -3577.4922  | 4185.5865 |
| 309.1746               | -49.0727    | -108.3943  | 656151.2420 | -16.7247  |
| -16.7310               |             |            |             |           |
| [5045]ENERGY: 14090000 | 3255.4691   | 5186.1184  | 5221.3292   |           |
| 344.3830               | -15868.6371 | -1730.3851 | 0.0000      | 0.0000    |
| 7715.5853              | 4123.8628   | 308.6620   | -3591.7225  | 4187.3422 |
| 309.2204               | 203.5602    | 97.3086    | 656151.2420 | -19.7478  |
| -19.7598               |             |            |             |           |
| [5084]ENERGY: 14100000 | 3231.3360   | 5114.2496  | 5257.8636   |           |
| 322.7053               | -15824.7928 | -1708.0189 | 0.0000      | 0.0000    |
| 7733.4446              | 4126.7874   | 309.3764   | -3606.6571  | 4187.3197 |
| 309.3831               | -0.4428     | 15.5295    | 656151.2420 | -26.1283  |
| -26.1083               |             |            |             |           |
| [5134]ENERGY: 14110000 | 3190.1038   | 5222.4540  | 5281.0873   |           |
| 330.1505               | -15891.7234 | -1736.6782 | 0.0000      | 0.0000    |
| 7730.8773              | 4126.2713   | 309.2737   | -3604.6060  | 4186.0899 |
| 309.1776               | 103.9830    | 97.5937    | 656151.2420 | -16.0117  |
| -16.0276               |             |            |             |           |
| [5170]ENERGY: 14120000 | 3222.4023   | 5225.8028  | 5308.1463   |           |
| 339.3288               | -15824.7663 | -1797.3815 | 0.0000      | 0.0000    |
| 7652.5954              | 4126.1279   | 306.1421   | -3526.4675  | 4186.7796 |
| 309.3299               | -158.4094   | -119.9951  | 656151.2420 | -14.1881  |
| -14.1763               |             |            |             |           |
| [5220]ENERGY: 14130000 | 3193.6973   | 5201.8875  | 5271.7506   |           |
| 341.0180               | -15796.7274 | -1832.7912 | 0.0000      | 0.0000    |
| 7747.3796              | 4126.2144   | 309.9339   | -3621.1652  | 4186.9700 |
| 309.3391               | -46.8502    | -29.5053   | 656151.2420 | -16.6336  |
| -16.6328               |             |            |             |           |
| [5256]ENERGY: 14140000 | 3302.5540   | 5301.3951  | 5295.1880   |           |
| 343.9507               | -15905.2492 | -1880.9277 | 0.0000      | 0.0000    |
| 7670.2686              | 4127.1795   | 306.8491   | -3543.0891  | 4186.4468 |
| 309.3751               | -248.9252   | -227.5581  | 656151.2420 | -12.7297  |
| -12.7315               |             |            |             |           |
| [5306]ENERGY: 14150000 | 3218.5331   | 5213.5191  | 5268.7758   |           |
| 338.5247               | -15828.1168 | -1767.5731 | 0.0000      | 0.0000    |
| 7680.3398              | 4124.0026   | 307.2520   | -3556.3372  | 4185.0910 |
| 309.4202               | 46.9496     | -50.7088   | 656151.2420 | -15.3822  |
| -15.3903               |             |            |             |           |
| [5342]ENERGY: 14160000 | 3192.9592   | 5217.9421  | 5284.1016   |           |
| 342.0198               | -15851.0770 | -1778.9940 | 0.0000      | 0.0000    |
| 7715.7688              | 4122.7205   | 308.6693   | -3593.0484  | 4184.9430 |
| 309.2598               | 221.5150    | 178.4623   | 656151.2420 | -17.0889  |
| -17.0713               |             |            |             |           |
| [5392]ENERGY: 14170000 | 3154.6936   | 5140.5336  | 5291.0070   |           |
| 346.7243               | -15776.0118 | -1738.4189 | 0.0000      | 0.0000    |
| 7702.8314              | 4121.3592   | 308.1518   | -3581.4722  | 4185.1829 |
| 309.3294               | 120.0371    | 39.3197    | 656151.2420 | -17.0514  |
| -17.0691               |             |            |             |           |
| [5428]ENERGY: 14180000 | 3246.4671   | 5175.7967  | 5249.0902   |           |
| 339.0905               | -15864.4338 | -1784.7544 | 0.0000      | 0.0000    |

## Supplementary Text 6

|                        |             |            |             |           |
|------------------------|-------------|------------|-------------|-----------|
| 7758.9752              | 4120.2315   | 310.3978   | -3638.7437  | 4185.7091 |
| 309.4262               | -155.7909   | -122.1099  | 656151.2420 | -17.8979  |
| -17.8891               |             |            |             |           |
| [5478]ENERGY: 14190000 | 3242.0625   | 5191.3756  | 5231.8666   |           |
| 343.4453               | -15789.2890 | -1845.7410 | 0.0000      | 0.0000    |
| 7750.9610              | 4124.6810   | 310.0772   | -3626.2799  | 4185.3410 |
| 309.3707               | -44.7900    | -37.3396   | 656151.2420 | -17.3421  |
| -17.3404               |             |            |             |           |
| [5517]ENERGY: 14200000 | 3255.8255   | 5232.1774  | 5289.2516   |           |
| 363.7433               | -15894.6648 | -1787.8588 | 0.0000      | 0.0000    |
| 7665.7315              | 4124.2056   | 306.6676   | -3541.5258  | 4185.7211 |
| 309.3589               | -45.8821    | -147.6018  | 656151.2420 | -16.8588  |
| -16.8678               |             |            |             |           |
| [5567]ENERGY: 14210000 | 3168.5566   | 5240.9801  | 5232.7209   |           |
| 332.1427               | -15809.2367 | -1795.4572 | 0.0000      | 0.0000    |
| 7754.7441              | 4124.4504   | 310.2285   | -3630.2937  | 4185.9291 |
| 309.2302               | -96.8963    | -10.3620   | 656151.2420 | -18.8026  |
| -18.7932               |             |            |             |           |
| [5603]ENERGY: 14220000 | 3274.9844   | 5144.0091  | 5256.7887   |           |
| 330.2416               | -15702.9843 | -1888.1065 | 0.0000      | 0.0000    |
| 7710.2788              | 4125.2119   | 308.4497   | -3585.0670  | 4186.2215 |
| 309.2845               | -110.6473   | -153.5177  | 656151.2420 | -16.4434  |
| -16.4407               |             |            |             |           |
| [5653]ENERGY: 14230000 | 3171.1749   | 5254.4411  | 5217.0349   |           |
| 349.0569               | -15894.9259 | -1787.5445 | 0.0000      | 0.0000    |
| 7810.8319              | 4120.0694   | 312.4723   | -3690.7625  | 4186.6500 |
| 309.4043               | -6.2445     | -17.9451   | 656151.2420 | -18.8949  |
| -18.9061               |             |            |             |           |
| [5689]ENERGY: 14240000 | 3235.0552   | 5264.9855  | 5242.3421   |           |
| 354.9173               | -15850.1609 | -1773.4320 | 0.0000      | 0.0000    |
| 7652.7520              | 4126.4592   | 306.1483   | -3526.2928  | 4186.4192 |
| 309.2522               | -144.8675   | -75.3089   | 656151.2420 | -15.8817  |
| -15.8753               |             |            |             |           |
| [5739]ENERGY: 14250000 | 3190.6058   | 5107.4073  | 5221.0543   |           |
| 317.9567               | -15815.2763 | -1744.7072 | 0.0000      | 0.0000    |
| 7844.5335              | 4121.5742   | 313.8206   | -3722.9593  | 4185.4826 |
| 309.1843               | -57.8870    | -44.0145   | 656151.2420 | -16.9347  |
| -16.9477               |             |            |             |           |
| [5775]ENERGY: 14260000 | 3224.4683   | 5313.8982  | 5234.1870   |           |
| 336.7483               | -15903.9667 | -1761.2943 | 0.0000      | 0.0000    |
| 7679.4303              | 4123.4712   | 307.2156   | -3555.9590  | 4186.3286 |
| 309.3405               | 50.8391     | 28.1366    | 656151.2420 | -15.6625  |
| -15.6522               |             |            |             |           |
| [5825]ENERGY: 14270000 | 3134.1672   | 5199.5623  | 5254.5540   |           |
| 338.3088               | -15792.8722 | -1758.9784 | 0.0000      | 0.0000    |
| 7751.5113              | 4126.2530   | 310.0992   | -3625.2583  | 4187.7383 |
| 309.3593               | 157.3350    | 66.2435    | 656151.2420 | -19.0506  |
| -19.0570               |             |            |             |           |
| [5861]ENERGY: 14280000 | 3093.7932   | 5131.9416  | 5284.1457   |           |
| 352.1154               | -15823.0835 | -1774.5881 | 0.0000      | 0.0000    |
| 7857.4548              | 4121.7790   | 314.3375   | -3735.6758  | 4188.1708 |
| 309.1749               | 76.6845     | 7.7948     | 656151.2420 | -19.2857  |
| -19.2825               |             |            |             |           |
| [5911]ENERGY: 14290000 | 3149.3190   | 5197.2651  | 5248.6128   |           |

## Supplementary Text 6

|                        |             |            |             |           |
|------------------------|-------------|------------|-------------|-----------|
| 314.8419               | -15758.9662 | -1753.3729 | 0.0000      | 0.0000    |
| 7730.3632              | 4128.0629   | 309.2532   | -3602.3003  | 4188.0437 |
| 309.1284               | 64.0783     | 31.9496    | 656151.2420 | -14.5186  |
| -14.5262               |             |            |             |           |
| [5950]ENERGY: 14300000 | 3164.8026   | 5226.8368  | 5240.4568   |           |
| 354.1976               | -15803.7332 | -1811.3874 | 0.0000      | 0.0000    |
| 7753.0635              | 4124.2366   | 310.1613   | -3628.8269  | 4188.3896 |
| 309.2536               | 3.7678      | -78.0757   | 656151.2420 | -21.2303  |
| -21.2286               |             |            |             |           |
| [6000]ENERGY: 14310000 | 3192.8666   | 5175.6131  | 5292.0940   |           |
| 338.7393               | -15880.6113 | -1718.3560 | 0.0000      | 0.0000    |
| 7725.0521              | 4125.3979   | 309.0407   | -3599.6543  | 4186.4800 |
| 309.1574               | 74.0009     | 45.2993    | 656151.2420 | -19.0536  |
| -19.0482               |             |            |             |           |
| [6036]ENERGY: 14320000 | 3152.4988   | 5177.1166  | 5301.0351   |           |
| 331.7817               | -15794.9675 | -1716.6832 | 0.0000      | 0.0000    |
| 7677.8678              | 4128.6492   | 307.1531   | -3549.2186  | 4188.7738 |
| 309.0720               | 178.7196    | 77.6907    | 656151.2420 | -17.1074  |
| -17.1145               |             |            |             |           |
| [6086]ENERGY: 14330000 | 3206.6975   | 5315.2074  | 5268.5380   |           |
| 349.7838               | -15908.0264 | -1816.0939 | 0.0000      | 0.0000    |
| 7708.6006              | 4124.7071   | 308.3826   | -3583.8935  | 4189.4312 |
| 309.2491               | -220.3468   | -142.8849  | 656151.2420 | -18.2286  |
| -18.2056               |             |            |             |           |
| [6122]ENERGY: 14340000 | 3176.9709   | 5240.8580  | 5272.7152   |           |
| 344.5234               | -15866.8599 | -1788.4607 | 0.0000      | 0.0000    |
| 7747.4925              | 4127.2395   | 309.9384   | -3620.2530  | 4190.3512 |
| 309.1733               | 0.2879      | -49.6315   | 656151.2420 | -14.7166  |
| -14.7473               |             |            |             |           |
| [6172]ENERGY: 14350000 | 3215.6114   | 5223.0644  | 5279.8187   |           |
| 320.7588               | -15871.4074 | -1752.9178 | 0.0000      | 0.0000    |
| 7714.5498              | 4129.4780   | 308.6206   | -3585.0719  | 4189.6344 |
| 309.2869               | 162.7820    | 93.8713    | 656151.2420 | -21.0260  |
| -21.0063               |             |            |             |           |
| [6208]ENERGY: 14360000 | 3214.4408   | 5210.7720  | 5251.1257   |           |
| 337.4481               | -15834.3816 | -1784.0815 | 0.0000      | 0.0000    |
| 7732.6349              | 4127.9583   | 309.3441   | -3604.6766  | 4189.8776 |
| 309.2878               | -68.0082    | -84.4713   | 656151.2420 | -18.7236  |
| -18.7263               |             |            |             |           |
| [6258]ENERGY: 14370000 | 3222.2988   | 5188.9060  | 5295.9016   |           |
| 317.0195               | -15871.3075 | -1729.7314 | 0.0000      | 0.0000    |
| 7706.1828              | 4129.2699   | 308.2858   | -3576.9129  | 4189.7056 |
| 309.1411               | -32.8325    | -124.9147  | 656151.2420 | -22.1013  |
| -22.0983               |             |            |             |           |
| [6294]ENERGY: 14380000 | 3175.2670   | 5259.7708  | 5237.5912   |           |
| 357.7122               | -15800.7953 | -1801.8905 | 0.0000      | 0.0000    |
| 7699.7917              | 4127.4470   | 308.0302   | -3572.3447  | 4191.2775 |
| 309.0881               | 156.5464    | 26.8432    | 656151.2420 | -14.3280  |
| -14.3328               |             |            |             |           |
| [6344]ENERGY: 14390000 | 3174.1183   | 5216.2730  | 5245.2248   |           |
| 357.8380               | -15806.9348 | -1829.3226 | 0.0000      | 0.0000    |
| 7766.7788              | 4123.9756   | 310.7100   | -3642.8032  | 4190.2329 |
| 309.0824               | 81.0992     | 105.6167   | 656151.2420 | -18.2218  |
| -18.2186               |             |            |             |           |

## Supplementary Text 6

|                        |             |            |             |           |
|------------------------|-------------|------------|-------------|-----------|
| [6383]ENERGY: 14400000 | 3171.0805   | 5335.3566  | 5229.2965   |           |
| 343.4491               | -15917.0102 | -1782.0509 | 0.0000      | 0.0000    |
| 7747.3889              | 4127.5105   | 309.9343   | -3619.8784  | 4189.4250 |
| 309.2789               | 156.7735    | 134.4340   | 656151.2420 | -14.9838  |
| -14.9782               |             |            |             |           |
| [6433]ENERGY: 14410000 | 3163.2464   | 5359.6987  | 5231.0680   |           |
| 340.6817               | -15869.8231 | -1814.1795 | 0.0000      | 0.0000    |
| 7717.7657              | 4128.4579   | 308.7492   | -3589.3078  | 4190.3141 |
| 309.3213               | 51.9711     | 8.6760     | 656151.2420 | -14.0671  |
| -14.0752               |             |            |             |           |
| [6469]ENERGY: 14420000 | 3208.3749   | 5210.2620  | 5240.3219   |           |
| 337.8659               | -15797.7740 | -1811.2434 | 0.0000      | 0.0000    |
| 7737.9039              | 4125.7113   | 309.5548   | -3612.1926  | 4190.7189 |
| 309.5121               | 83.8972     | 17.6090    | 656151.2420 | -15.7887  |
| -15.8060               |             |            |             |           |
| [6519]ENERGY: 14430000 | 3176.3008   | 5155.7768  | 5270.3115   |           |
| 341.1353               | -15848.1098 | -1732.7396 | 0.0000      | 0.0000    |
| 7761.4192              | 4124.0942   | 310.4956   | -3637.3249  | 4188.8465 |
| 309.4058               | 78.8751     | 67.1931    | 656151.2420 | -17.0326  |
| -17.0346               |             |            |             |           |
| [6555]ENERGY: 14440000 | 3225.5889   | 5151.3636  | 5304.9659   |           |
| 357.8229               | -15885.1843 | -1819.6836 | 0.0000      | 0.0000    |
| 7791.2029              | 4126.0762   | 311.6871   | -3665.1267  | 4188.7262 |
| 309.3317               | -73.7170    | -62.4989   | 656151.2420 | -15.3094  |
| -15.2830               |             |            |             |           |
| [6605]ENERGY: 14450000 | 3197.3405   | 5246.9269  | 5256.4723   |           |
| 325.7236               | -15823.5026 | -1802.8853 | 0.0000      | 0.0000    |
| 7726.2366              | 4126.3119   | 309.0881   | -3599.9248  | 4188.0125 |
| 309.3156               | -45.0099    | -43.9513   | 656151.2420 | -15.6974  |
| -15.6948               |             |            |             |           |
| [6641]ENERGY: 14460000 | 3205.4099   | 5219.1098  | 5271.8235   |           |
| 316.3965               | -15837.1043 | -1780.4459 | 0.0000      | 0.0000    |
| 7727.5050              | 4122.6944   | 309.1388   | -3604.8105  | 4187.1340 |
| 309.3768               | -190.9115   | -143.2877  | 656151.2420 | -16.3934  |
| -16.3994               |             |            |             |           |
| [6691]ENERGY: 14470000 | 3200.5203   | 5177.0278  | 5301.8373   |           |
| 363.5226               | -15820.4245 | -1843.5254 | 0.0000      | 0.0000    |
| 7747.0220              | 4125.9800   | 309.9196   | -3621.0419  | 4186.7460 |
| 309.3218               | 38.7072     | -29.6133   | 656151.2420 | -17.5776  |
| -17.5928               |             |            |             |           |
| [6727]ENERGY: 14480000 | 3152.9381   | 5133.3088  | 5273.6755   |           |
| 358.3459               | -15893.0414 | -1657.3481 | 0.0000      | 0.0000    |
| 7757.8068              | 4125.6854   | 310.3511   | -3632.1213  | 4187.3043 |
| 309.2694               | 308.0049    | 271.3607   | 656151.2420 | -16.1585  |
| -16.1602               |             |            |             |           |
| [6777]ENERGY: 14490000 | 3207.8906   | 5243.6552  | 5280.7718   |           |
| 329.4491               | -15799.8429 | -1774.9563 | 0.0000      | 0.0000    |
| 7639.4240              | 4126.3916   | 305.6152   | -3513.0324  | 4187.0368 |
| 309.2638               | 26.6066     | -0.6625    | 656151.2420 | -17.0655  |
| -17.0588               |             |            |             |           |
| [6816]ENERGY: 14500000 | 3158.6783   | 5301.9073  | 5260.5919   |           |
| 328.2754               | -15917.4994 | -1789.4366 | 0.0000      | 0.0000    |
| 7780.7846              | 4123.3016   | 311.2703   | -3657.4831  | 4189.1905 |
| 309.3745               | 51.3453     | 15.8412    | 656151.2420 | -14.4418  |

Supplementary Text 6

-14.4301  
 [6866]ENERGY: 14510000      3215.6101      5248.3501      5244.1663  
 342.0602      -15963.3045      -1698.5049      0.0000      0.0000  
 7739.6335      4128.0108      309.6240      -3611.6227      4188.1840  
 309.2255      179.6576      119.1930      656151.2420      -20.0329  
 -20.0306  
 [6902]ENERGY: 14520000      3219.3456      5238.4750      5252.4942  
 339.2658      -15815.2772      -1797.0265      0.0000      0.0000  
 7693.0434      4130.3204      307.7602      -3562.7230      4189.8833  
 309.5014      4.2828      -47.5297      656151.2420      -15.5209  
 -15.5290  
 [6952]ENERGY: 14530000      3129.7253      5251.2036      5309.0444  
 345.5056      -15840.0154      -1792.8800      0.0000      0.0000  
 7727.6637      4130.2471      309.1452      -3597.4166      4189.5174  
 309.3090      -27.9989      -55.1102      656151.2420      -19.5229  
 -19.5300  
 [6988]ENERGY: 14540000      3224.6202      5195.1665      5292.0321  
 344.9964      -15933.1335      -1713.2182      0.0000      0.0000  
 7717.9389      4128.4025      308.7561      -3589.5364      4189.4538  
 309.2220      64.1689      -3.0873      656151.2420      -17.7993  
 -17.8016  
 [7038]ENERGY: 14550000      3305.8621      5202.6061      5253.4909  
 339.4111      -15849.8800      -1833.7348      0.0000      0.0000  
 7707.7499      4125.5055      308.3485      -3582.2445      4188.6657  
 309.2076      7.6913      -38.9190      656151.2420      -17.5646  
 -17.5736  
 [7074]ENERGY: 14560000      3184.7696      5112.3323      5287.5108  
 352.4224      -15895.3051      -1703.5821      0.0000      0.0000  
 7786.4663      4124.6143      311.4976      -3661.8521      4188.2488  
 309.2879      104.9740      138.5435      656151.2420      -17.5298  
 -17.5201  
 [7124]ENERGY: 14570000      3158.5809      5184.8051      5304.4841  
 360.7349      -15803.6093      -1809.7065      0.0000      0.0000  
 7729.1799      4124.4690      309.2058      -3604.7109      4189.4536  
 309.2860      53.2150      48.4115      656151.2420      -13.9903  
 -13.9876  
 [7160]ENERGY: 14580000      3152.3736      5225.6580      5327.0103  
 317.1516      -15886.7781      -1803.5159      0.0000      0.0000  
 7794.7034      4126.6030      311.8271      -3668.1005      4189.4381  
 309.3258      -16.9721      -94.5012      656151.2420      -18.4095  
 -18.4025  
 [7210]ENERGY: 14590000      3138.6512      5222.3853      5269.9390  
 332.2547      -15836.1046      -1746.1880      0.0000      0.0000  
 7746.3569      4127.2944      309.8930      -3619.0625      4189.8762  
 309.2165      -16.1593      18.0935      656151.2420      -12.2000  
 -12.1944  
 [7249]ENERGY: 14600000      3214.5609      5180.0773      5309.7329  
 338.1959      -15853.0897      -1711.8118      0.0000      0.0000  
 7649.5963      4127.2618      306.0221      -3522.3345      4189.4391  
 309.2101      173.3057      107.3203      656151.2420      -15.9238  
 -15.9324  
 [7299]ENERGY: 14610000      3172.6583      5278.6044      5233.5852  
 335.1786      -15821.7126      -1784.6002      0.0000      0.0000  
 7710.1933      4123.9071      308.4463      -3586.2862      4188.6815



Supplementary Text 6

|                        |             |            |             |           |
|------------------------|-------------|------------|-------------|-----------|
| 309.2693               | 129.9664    | 55.4121    | 656151.2420 | -19.3242  |
| -19.3278               |             |            |             |           |
| [7335]ENERGY: 14620000 | 3195.9847   | 5213.4566  | 5303.9858   |           |
| 330.5860               | -15812.6336 | -1817.2972 | 0.0000      | 0.0000    |
| 7713.0649              | 4127.1472   | 308.5612   | -3585.9177  | 4189.7449 |
| 309.0908               | 28.2940     | 37.9305    | 656151.2420 | -13.8576  |
| -13.8532               |             |            |             |           |
| [7385]ENERGY: 14630000 | 3202.9654   | 5330.5866  | 5289.0391   |           |
| 345.9707               | -15896.8894 | -1782.5719 | 0.0000      | 0.0000    |
| 7640.3531              | 4129.4537   | 305.6523   | -3510.8994  | 4189.4474 |
| 309.2580               | -17.2094    | -80.3083   | 656151.2420 | -16.8389  |
| -16.8315               |             |            |             |           |
| [7421]ENERGY: 14640000 | 3258.0493   | 5209.0445  | 5277.0961   |           |
| 345.9915               | -15832.1659 | -1808.8756 | 0.0000      | 0.0000    |
| 7681.2692              | 4130.4092   | 307.2892   | -3550.8600  | 4189.2304 |
| 309.2285               | 107.2372    | 56.9387    | 656151.2420 | -15.3933  |
| -15.4072               |             |            |             |           |
| [7471]ENERGY: 14650000 | 3293.9827   | 5166.8189  | 5234.1137   |           |
| 364.8216               | -15801.5773 | -1810.0932 | 0.0000      | 0.0000    |
| 7681.7527              | 4129.8193   | 307.3085   | -3551.9334  | 4189.2660 |
| 309.1374               | -165.7949   | -61.2906   | 656151.2420 | -15.3758  |
| -15.3645               |             |            |             |           |
| [7507]ENERGY: 14660000 | 3233.9044   | 5201.2339  | 5303.7664   |           |
| 368.7789               | -15853.5400 | -1848.5763 | 0.0000      | 0.0000    |
| 7723.2562              | 4128.8234   | 308.9689   | -3594.4328  | 4190.9491 |
| 309.3542               | -108.1849   | -164.1346  | 656151.2420 | -12.6282  |
| -12.6259               |             |            |             |           |
| [7557]ENERGY: 14670000 | 3195.9115   | 5300.9267  | 5274.0681   |           |
| 343.5701               | -15809.8675 | -1881.4889 | 0.0000      | 0.0000    |
| 7704.0678              | 4127.1878   | 308.2012   | -3576.8800  | 4191.5439 |
| 309.2419               | -204.3511   | -176.7575  | 656151.2420 | -14.1067  |
| -14.1017               |             |            |             |           |
| [7593]ENERGY: 14680000 | 3156.0166   | 5279.2349  | 5266.8742   |           |
| 326.0178               | -15970.4799 | -1715.7012 | 0.0000      | 0.0000    |
| 7783.7397              | 4125.7020   | 311.3885   | -3658.0377  | 4190.9791 |
| 309.2917               | 78.1770     | 71.6889    | 656151.2420 | -14.5174  |
| -14.5247               |             |            |             |           |
| [7643]ENERGY: 14690000 | 3211.0045   | 5206.2466  | 5318.8762   |           |
| 347.2336               | -15832.7121 | -1821.3018 | 0.0000      | 0.0000    |
| 7699.2842              | 4128.6312   | 308.0099   | -3570.6530  | 4190.4911 |
| 309.1159               | 7.1279      | -116.9607  | 656151.2420 | -15.7066  |
| -15.7223               |             |            |             |           |
| [7682]ENERGY: 14700000 | 3288.5682   | 5088.9179  | 5296.0161   |           |
| 348.1760               | -15828.3815 | -1794.0090 | 0.0000      | 0.0000    |
| 7730.2336              | 4129.5214   | 309.2480   | -3600.7123  | 4189.1126 |
| 309.1450               | -28.7633    | 41.4127    | 656151.2420 | -15.4399  |
| -15.4230               |             |            |             |           |
| [7732]ENERGY: 14710000 | 3239.7769   | 5249.5610  | 5258.5266   |           |
| 344.5154               | -15865.4833 | -1801.2141 | 0.0000      | 0.0000    |
| 7702.8300              | 4128.5125   | 308.1517   | -3574.3175  | 4190.7879 |
| 309.1789               | 25.6337     | 66.7161    | 656151.2420 | -16.0514  |
| -16.0550               |             |            |             |           |
| [7768]ENERGY: 14720000 | 3118.8108   | 5333.7110  | 5248.8454   |           |
| 333.7441               | -15882.4507 | -1738.0315 | 0.0000      | 0.0000    |

## Supplementary Text 6

|                        |             |            |             |           |
|------------------------|-------------|------------|-------------|-----------|
| 7716.3876              | 4131.0167   | 308.6941   | -3585.3709  | 4190.0174 |
| 309.2836               | 28.6332     | 23.7767    | 656151.2420 | -16.9619  |
| -16.9448               |             |            |             |           |
| [7818]ENERGY: 14730000 | 3189.4050   | 5193.1013  | 5268.9562   |           |
| 339.8943               | -15848.2496 | -1751.8600 | 0.0000      | 0.0000    |
| 7735.1266              | 4126.3739   | 309.4437   | -3608.7527  | 4189.9130 |
| 309.2476               | -100.3296   | -121.7460  | 656151.2420 | -12.2777  |
| -12.3158               |             |            |             |           |
| [7854]ENERGY: 14740000 | 3188.8315   | 5217.6284  | 5274.4669   |           |
| 324.7402               | -15838.4346 | -1810.8967 | 0.0000      | 0.0000    |
| 7768.3053              | 4124.6411   | 310.7711   | -3643.6642  | 4190.7432 |
| 309.2562               | 60.3123     | 40.2502    | 656151.2420 | -17.3322  |
| -17.2960               |             |            |             |           |
| [7904]ENERGY: 14750000 | 3234.3931   | 5256.4807  | 5278.5582   |           |
| 327.5707               | -15903.9992 | -1803.3530 | 0.0000      | 0.0000    |
| 7740.8189              | 4130.4695   | 309.6715   | -3610.3494  | 4190.5699 |
| 309.2767               | 33.6779     | 28.2070    | 656151.2420 | -12.7577  |
| -12.7692               |             |            |             |           |
| [7940]ENERGY: 14760000 | 3212.8698   | 5211.0149  | 5322.7198   |           |
| 313.9200               | -15824.6268 | -1808.4349 | 0.0000      | 0.0000    |
| 7702.6228              | 4130.0855   | 308.1434   | -3572.5372  | 4189.9730 |
| 309.2246               | 69.3941     | 29.0168    | 656151.2420 | -15.1479  |
| -15.1474               |             |            |             |           |
| [7990]ENERGY: 14770000 | 3165.4893   | 5274.0143  | 5248.8782   |           |
| 319.3131               | -15924.6305 | -1772.6576 | 0.0000      | 0.0000    |
| 7815.9565              | 4126.3633   | 312.6773   | -3689.5932  | 4190.4435 |
| 309.3327               | -11.7172    | 30.7135    | 656151.2420 | -12.8711  |
| -12.8861               |             |            |             |           |
| [8026]ENERGY: 14780000 | 3128.7465   | 5227.3612  | 5259.5949   |           |
| 326.3087               | -15731.5587 | -1835.2674 | 0.0000      | 0.0000    |
| 7751.5483              | 4126.7336   | 310.1007   | -3624.8147  | 4191.4590 |
| 309.2896               | -55.1629    | -119.8620  | 656151.2420 | -13.1626  |
| -13.1582               |             |            |             |           |
| [8076]ENERGY: 14790000 | 3121.6819   | 5295.5321  | 5280.9611   |           |
| 344.2775               | -15867.5302 | -1781.3692 | 0.0000      | 0.0000    |
| 7736.5474              | 4130.1007   | 309.5006   | -3606.4467  | 4192.1806 |
| 309.3735               | 112.6936    | 105.1518   | 656151.2420 | -17.2745  |
| -17.2608               |             |            |             |           |
| [8115]ENERGY: 14800000 | 3162.5856   | 5297.7191  | 5303.5631   |           |
| 349.5201               | -15836.0344 | -1804.6622 | 0.0000      | 0.0000    |
| 7659.4122              | 4132.1034   | 306.4148   | -3527.3089  | 4190.9473 |
| 309.3449               | 14.0716     | -65.1096   | 656151.2420 | -22.5482  |
| -22.5619               |             |            |             |           |
| [8165]ENERGY: 14810000 | 3139.8242   | 5251.9052  | 5268.8408   |           |
| 349.3447               | -15818.5532 | -1761.7648 | 0.0000      | 0.0000    |
| 7699.4865              | 4129.0834   | 308.0180   | -3570.4031  | 4190.8723 |
| 309.2718               | 12.8781     | 19.2111    | 656151.2420 | -18.1018  |
| -18.0982               |             |            |             |           |
| [8201]ENERGY: 14820000 | 3251.1630   | 5206.8424  | 5261.4769   |           |
| 332.2980               | -15790.2069 | -1819.8684 | 0.0000      | 0.0000    |
| 7690.4174              | 4132.1224   | 307.6551   | -3558.2950  | 4191.3806 |
| 309.3644               | -174.2865   | -160.9988  | 656151.2420 | -16.9923  |
| -16.9958               |             |            |             |           |
| [8251]ENERGY: 14830000 | 3129.5523   | 5297.7934  | 5297.2207   |           |

## Supplementary Text 6

|                        |             |            |             |           |
|------------------------|-------------|------------|-------------|-----------|
| 347.5133               | -15779.7046 | -1853.3462 | 0.0000      | 0.0000    |
| 7690.2212              | 4129.2500   | 307.6473   | -3560.9712  | 4191.5554 |
| 309.3587               | 77.1940     | 17.1290    | 656151.2420 | -12.3615  |
| -12.3702               |             |            |             |           |
| [8287]ENERGY: 14840000 | 3181.0640   | 5215.1179  | 5268.8454   |           |
| 348.5848               | -15865.0180 | -1756.1235 | 0.0000      | 0.0000    |
| 7736.5649              | 4129.0356   | 309.5013   | -3607.5294  | 4191.6515 |
| 309.2739               | 190.2864    | 129.0483   | 656151.2420 | -13.9702  |
| -13.9592               |             |            |             |           |
| [8337]ENERGY: 14850000 | 3203.5646   | 5173.6891  | 5284.1871   |           |
| 337.3077               | -15809.7539 | -1850.1196 | 0.0000      | 0.0000    |
| 7791.8251              | 4130.7001   | 311.7120   | -3661.1249  | 4192.0118 |
| 309.2363               | -85.4458    | -90.4445   | 656151.2420 | -12.9872  |
| -12.9996               |             |            |             |           |
| [8373]ENERGY: 14860000 | 3189.8777   | 5266.5327  | 5270.9352   |           |
| 343.9612               | -15834.2582 | -1823.4186 | 0.0000      | 0.0000    |
| 7717.1412              | 4130.7712   | 308.7242   | -3586.3700  | 4191.7686 |
| 309.2237               | -120.4226   | -70.1457   | 656151.2420 | -16.9000  |
| -16.8871               |             |            |             |           |
| [8423]ENERGY: 14870000 | 3181.6994   | 5274.5137  | 5340.1553   |           |
| 334.5678               | -15934.0919 | -1800.0714 | 0.0000      | 0.0000    |
| 7735.3166              | 4132.0895   | 309.4513   | -3603.2271  | 4192.2330 |
| 309.0096               | 32.5972     | -43.7802   | 656151.2420 | -15.4510  |
| -15.4486               |             |            |             |           |
| [8459]ENERGY: 14880000 | 3261.2360   | 5247.3238  | 5298.2824   |           |
| 343.3980               | -15903.8082 | -1790.2369 | 0.0000      | 0.0000    |
| 7674.1283              | 4130.3233   | 307.0035   | -3543.8050  | 4192.1132 |
| 309.0553               | -150.7376   | -137.6514  | 656151.2420 | -14.8382  |
| -14.8237               |             |            |             |           |
| [8509]ENERGY: 14890000 | 3168.4150   | 5211.8555  | 5267.5855   |           |
| 344.8516               | -15849.4732 | -1762.0317 | 0.0000      | 0.0000    |
| 7748.8154              | 4130.0180   | 309.9914   | -3618.7974  | 4193.4333 |
| 309.4245               | 49.4308     | 8.1982     | 656151.2420 | -14.4432  |
| -14.4672               |             |            |             |           |
| [8548]ENERGY: 14900000 | 3220.7224   | 5228.4518  | 5233.4747   |           |
| 334.3258               | -15828.9549 | -1763.8466 | 0.0000      | 0.0000    |
| 7705.9016              | 4130.0749   | 308.2746   | -3575.8267  | 4192.6295 |
| 309.2337               | -4.3315     | -19.2442   | 656151.2420 | -16.2970  |
| -16.2970               |             |            |             |           |
| [8598]ENERGY: 14910000 | 3097.8054   | 5326.2708  | 5227.2212   |           |
| 351.7281               | -15852.6252 | -1761.6299 | 0.0000      | 0.0000    |
| 7742.1925              | 4130.9629   | 309.7264   | -3611.2296  | 4192.6628 |
| 309.3347               | 140.5589    | 57.8506    | 656151.2420 | -13.0223  |
| -13.0294               |             |            |             |           |
| [8634]ENERGY: 14920000 | 3090.0389   | 5232.9082  | 5262.0101   |           |
| 350.4444               | -15825.9974 | -1688.1947 | 0.0000      | 0.0000    |
| 7708.3784              | 4129.5879   | 308.3737   | -3578.7905  | 4191.6681 |
| 309.3361               | 70.8892     | 59.0358    | 656151.2420 | -15.4166  |
| -15.3908               |             |            |             |           |
| [8684]ENERGY: 14930000 | 3153.9364   | 5245.5242  | 5275.6900   |           |
| 341.1713               | -15800.4976 | -1775.1825 | 0.0000      | 0.0000    |
| 7686.1205              | 4126.7622   | 307.4832   | -3559.3583  | 4191.6288 |
| 309.1833               | 68.4082     | 69.3682    | 656151.2420 | -12.4820  |
| -12.4814               |             |            |             |           |

## Supplementary Text 6

|                        |             |            |             |           |
|------------------------|-------------|------------|-------------|-----------|
| [8720]ENERGY: 14940000 | 3266.7374   | 5305.6127  | 5226.3664   |           |
| 322.7905               | -15862.4576 | -1809.1279 | 0.0000      | 0.0000    |
| 7681.3875              | 4131.3090   | 307.2939   | -3550.0785  | 4193.0776 |
| 309.2282               | -50.9851    | -82.9199   | 656151.2420 | -14.5945  |
| -14.6287               |             |            |             |           |
| [8770]ENERGY: 14950000 | 3324.8985   | 5268.0007  | 5209.8287   |           |
| 333.6602               | -15896.6267 | -1741.2620 | 0.0000      | 0.0000    |
| 7636.8536              | 4135.3530   | 305.5123   | -3501.5006  | 4193.0445 |
| 309.2008               | -189.2625   | -221.1751  | 656151.2420 | -13.9970  |
| -13.9712               |             |            |             |           |
| [8806]ENERGY: 14960000 | 3250.0062   | 5309.8100  | 5265.7094   |           |
| 328.5304               | -15980.9798 | -1738.6748 | 0.0000      | 0.0000    |
| 7696.3364              | 4130.7377   | 307.8919   | -3565.5987  | 4191.3855 |
| 309.3972               | -81.1369    | -58.3620   | 656151.2420 | -14.0426  |
| -14.0371               |             |            |             |           |
| [8856]ENERGY: 14970000 | 3145.6237   | 5280.6708  | 5256.3201   |           |
| 333.9962               | -15856.1878 | -1796.6637 | 0.0000      | 0.0000    |
| 7764.0890              | 4127.8483   | 310.6024   | -3636.2407  | 4192.1053 |
| 309.5003               | -121.5072   | -6.4556    | 656151.2420 | -12.8460  |
| -12.8503               |             |            |             |           |
| [8892]ENERGY: 14980000 | 3154.3008   | 5274.0539  | 5262.5684   |           |
| 354.9710               | -15894.5570 | -1728.7194 | 0.0000      | 0.0000    |
| 7709.9855              | 4132.6032   | 308.4380   | -3577.3823  | 4193.1003 |
| 309.5832               | 61.3501     | -3.6153    | 656151.2420 | -15.2554  |
| -15.2673               |             |            |             |           |
| [8942]ENERGY: 14990000 | 3181.7784   | 5191.1112  | 5260.8207   |           |
| 359.7053               | -15843.0694 | -1779.3981 | 0.0000      | 0.0000    |
| 7760.8777              | 4131.8258   | 310.4739   | -3629.0519  | 4192.8227 |
| 309.7935               | 125.4354    | 62.7299    | 656151.2420 | -13.9821  |
| -13.9615               |             |            |             |           |
| [8981]ENERGY: 15000000 | 3146.3691   | 5200.5828  | 5250.9751   |           |
| 353.2710               | -15872.7361 | -1818.9619 | 0.0000      | 0.0000    |
| 7866.1594              | 4125.6594   | 314.6857   | -3740.5001  | 4192.5623 |
| 309.5566               | -103.9507   | -57.8508   | 656151.2420 | -16.8204  |
| -16.8381               |             |            |             |           |
| [9031]ENERGY: 15010000 | 3227.1187   | 5182.6507  | 5256.9055   |           |
| 339.9228               | -15819.1810 | -1749.6616 | 0.0000      | 0.0000    |
| 7698.5076              | 4136.2627   | 307.9788   | -3562.2450  | 4193.0842 |
| 309.5164               | -55.4072    | -28.5564   | 656151.2420 | -13.2433  |
| -13.2287               |             |            |             |           |
| [9067]ENERGY: 15020000 | 3229.6510   | 5242.6345  | 5235.1935   |           |
| 348.2886               | -15839.0201 | -1767.9064 | 0.0000      | 0.0000    |
| 7685.8420              | 4134.6832   | 307.4721   | -3551.1588  | 4193.9829 |
| 309.5356               | -16.7093    | -3.6253    | 656151.2420 | -16.1389  |
| -16.1703               |             |            |             |           |
| [9117]ENERGY: 15030000 | 3193.5336   | 5243.1534  | 5292.4603   |           |
| 354.6708               | -15896.4917 | -1775.1753 | 0.0000      | 0.0000    |
| 7716.9433              | 4129.0945   | 308.7163   | -3587.8489  | 4193.7474 |
| 309.4385               | -62.2666    | -16.2639   | 656151.2420 | -16.3528  |
| -16.3322               |             |            |             |           |
| [9153]ENERGY: 15040000 | 3231.7994   | 5288.1857  | 5318.0913   |           |
| 370.1439               | -15969.1152 | -1748.7046 | 0.0000      | 0.0000    |
| 7639.2890              | 4129.6897   | 305.6098   | -3509.5993  | 4193.6527 |
| 309.5557               | 8.6642      | 44.7531    | 656151.2420 | -12.6624  |

Supplementary Text 6

-12.6596  
 [9203]ENERGY: 15050000      3156.4517      5166.1453      5272.6968  
 315.2398      -15891.1137      -1721.0891      0.0000      0.0000  
 7826.3230      4124.6537      313.0920      -3701.6693      4193.2792  
 309.4778      -124.2967      -18.8485      656151.2420      -14.3861  
 -14.3835  
 [9239]ENERGY: 15060000      3179.8819      5229.0229      5243.4104  
 340.1193      -15872.3954      -1768.2861      0.0000      0.0000  
 7778.5240      4130.2771      311.1799      -3648.2469      4195.1355  
 309.5111      34.3449      -23.2281      656151.2420      -14.8300  
 -14.8403  
 [9289]ENERGY: 15070000      3164.3061      5200.0569      5262.4687  
 350.1162      -15848.0843      -1781.5210      0.0000      0.0000  
 7784.4482      4131.7908      311.4168      -3652.6573      4193.9903  
 309.6078      38.0953      0.8820      656151.2420      -16.2556  
 -16.2570  
 [9325]ENERGY: 15080000      3233.4290      5225.1091      5268.4032  
 348.7973      -15903.4469      -1760.0756      0.0000      0.0000  
 7719.2127      4131.4287      308.8071      -3587.7840      4195.0347  
 309.5559      148.2119      30.2601      656151.2420      -14.9811  
 -14.9926  
 [9375]ENERGY: 15090000      3256.3085      5283.0349      5240.5525  
 326.3720      -15879.5781      -1788.5464      0.0000      0.0000  
 7694.7012      4132.8445      307.8265      -3561.8566      4194.4150  
 309.4076      44.8557      -1.5648      656151.2420      -13.5686  
 -13.5457  
 [9414]ENERGY: 15100000      3151.0401      5181.1852      5303.2246  
 321.6367      -15822.5529      -1805.7248      0.0000      0.0000  
 7804.7958      4133.6048      312.2309      -3671.1910      4194.7994  
 309.4265      -110.8819      -102.3407      656151.2420      -14.8277  
 -14.8295  
 [9464]ENERGY: 15110000      3222.4232      5155.3792      5262.9619  
 340.4457      -15684.2986      -1853.0523      0.0000      0.0000  
 7687.4309      4131.2900      307.5357      -3556.1409      4194.8753  
 309.1444      -269.8509      -171.2700      656151.2420      -12.0862  
 -12.0759  
 [9500]ENERGY: 15120000      3272.2549      5265.8284      5220.6090  
 337.4274      -15855.3292      -1794.3524      0.0000      0.0000  
 7687.1592      4133.5972      307.5248      -3553.5619      4194.7559  
 309.2298      -28.9728      -7.4010      656151.2420      -12.9204  
 -12.9309  
 [9550]ENERGY: 15130000      3185.9746      5330.2492      5221.4115  
 347.3616      -15858.0243      -1827.9193      0.0000      0.0000  
 7735.7877      4134.8411      309.4702      -3600.9466      4196.5419  
 309.4616      155.8440      118.8171      656151.2420      -15.6893  
 -15.6938  
 [9586]ENERGY: 15140000      3233.0449      5249.5260      5259.8557  
 354.4005      -15827.4741      -1861.0063      0.0000      0.0000  
 7724.2299      4132.5766      309.0078      -3591.6533      4195.7945  
 309.4616      -39.0605      -65.5660      656151.2420      -11.9921  
 -11.9933  
 [9636]ENERGY: 15150000      3246.6632      5227.4198      5225.2459  
 368.9836      -15850.1894      -1793.8147      0.0000      0.0000  
 7712.3837      4136.6921      308.5339      -3575.6916      4195.8766

## Supplementary Text 6

|                         |             |            |             |           |
|-------------------------|-------------|------------|-------------|-----------|
| 309.3888                | -94.6615    | -105.2746  | 656151.2420 | -13.8272  |
| -13.8231                |             |            |             |           |
| [9672]ENERGY: 15160000  | 3253.4453   | 5242.3451  | 5270.2662   |           |
| 320.6381                | -15824.4903 | -1807.2278 | 0.0000      | 0.0000    |
| 7678.1062               | 4133.0829   | 307.1626   | -3545.0234  | 4196.4016 |
| 309.5355                | -54.3457    | -34.1453   | 656151.2420 | -15.0096  |
| -15.0120                |             |            |             |           |
| [9722]ENERGY: 15170000  | 3161.2386   | 5215.4498  | 5209.4945   |           |
| 360.7052                | -15921.8081 | -1701.0739 | 0.0000      | 0.0000    |
| 7809.1985               | 4133.2048   | 312.4070   | -3675.9938  | 4196.4854 |
| 309.7185                | 104.2999    | 47.2779    | 656151.2420 | -14.6036  |
| -14.6131                |             |            |             |           |
| [9758]ENERGY: 15180000  | 3223.4059   | 5179.5277  | 5276.7636   |           |
| 323.9523                | -15836.1415 | -1781.4102 | 0.0000      | 0.0000    |
| 7745.4686               | 4131.5666   | 309.8575   | -3613.9021  | 4196.4794 |
| 309.4069                | -115.1923   | -65.3326   | 656151.2420 | -13.9969  |
| -13.9981                |             |            |             |           |
| [9808]ENERGY: 15190000  | 3140.4379   | 5151.7156  | 5274.3368   |           |
| 318.0708                | -15829.3713 | -1773.9807 | 0.0000      | 0.0000    |
| 7850.0758               | 4131.2848   | 314.0423   | -3718.7910  | 4196.2421 |
| 309.6347                | -61.7695    | -26.4713   | 656151.2420 | -14.7740  |
| -14.7566                |             |            |             |           |
| [9847]ENERGY: 15200000  | 3188.7622   | 5206.9254  | 5280.6022   |           |
| 348.8060                | -15830.6362 | -1727.2539 | 0.0000      | 0.0000    |
| 7670.4525               | 4137.6581   | 306.8565   | -3532.7944  | 4197.5407 |
| 309.6544                | 63.2061     | 64.0544    | 656151.2420 | -16.5773  |
| -16.5864                |             |            |             |           |
| [9897]ENERGY: 15210000  | 3181.8451   | 5194.8227  | 5223.0457   |           |
| 341.6019                | -15898.0557 | -1757.2033 | 0.0000      | 0.0000    |
| 7843.1422               | 4129.1986   | 313.7649   | -3713.9436  | 4196.6214 |
| 309.3593                | 12.1647     | 49.8012    | 656151.2420 | -14.8621  |
| -14.8562                |             |            |             |           |
| [9933]ENERGY: 15220000  | 3236.0131   | 5236.9472  | 5309.0313   |           |
| 330.7793                | -15812.7703 | -1810.9542 | 0.0000      | 0.0000    |
| 7648.9058               | 4137.9522   | 305.9945   | -3510.9535  | 4197.9093 |
| 309.5545                | 96.5533     | 88.2100    | 656151.2420 | -13.0976  |
| -13.0950                |             |            |             |           |
| [9983]ENERGY: 15230000  | 3197.6751   | 5204.3299  | 5253.9122   |           |
| 326.9015                | -15923.3614 | -1733.9594 | 0.0000      | 0.0000    |
| 7808.1054               | 4133.6032   | 312.3633   | -3674.5021  | 4197.8225 |
| 309.8327                | 142.1899    | 48.2276    | 656151.2420 | -12.9037  |
| -12.9215                |             |            |             |           |
| [10019]ENERGY: 15240000 | 3161.0633   | 5193.6789  | 5299.5015   |           |
| 351.4214                | -15816.8531 | -1789.1715 | 0.0000      | 0.0000    |
| 7736.3954               | 4136.0359   | 309.4945   | -3600.3595  | 4197.7452 |
| 309.8687                | -94.4237    | -46.4995   | 656151.2420 | -20.6611  |
| -20.6414                |             |            |             |           |
| [10069]ENERGY: 15250000 | 3232.2071   | 5205.6441  | 5233.2831   |           |
| 351.5115                | -15853.6720 | -1845.0239 | 0.0000      | 0.0000    |
| 7815.3061               | 4139.2560   | 312.6513   | -3676.0501  | 4199.1688 |
| 309.7956                | -9.4753     | -11.9381   | 656151.2420 | -15.9663  |
| -15.9726                |             |            |             |           |
| [10105]ENERGY: 15260000 | 3302.4975   | 5188.5826  | 5301.8116   |           |
| 324.3568                | -15937.8976 | -1735.7605 | 0.0000      | 0.0000    |

## Supplementary Text 6

|                         |             |            |             |           |
|-------------------------|-------------|------------|-------------|-----------|
| 7689.2623               | 4132.8528   | 307.6089   | -3556.4096  | 4197.7323 |
| 309.6221                | 3.0749      | -34.8337   | 656151.2420 | -21.1605  |
| -21.1592                |             |            |             |           |
| [10155]ENERGY: 15270000 | 3213.2552   | 5148.2979  | 5295.0638   |           |
| 318.9304                | -15773.7309 | -1784.0682 | 0.0000      | 0.0000    |
| 7715.9835               | 4133.7317   | 308.6779   | -3582.2518  | 4197.3608 |
| 309.4758                | 27.7780     | -43.8973   | 656151.2420 | -17.6371  |
| -17.6436                |             |            |             |           |
| [10191]ENERGY: 15280000 | 3303.2234   | 5202.9866  | 5275.7521   |           |
| 356.2383                | -15771.1451 | -1853.4712 | 0.0000      | 0.0000    |
| 7625.1637               | 4138.7478   | 305.0447   | -3486.4159  | 4198.4973 |
| 309.5687                | -104.4969   | -198.8177  | 656151.2420 | -18.4113  |
| -18.4245                |             |            |             |           |
| [10241]ENERGY: 15290000 | 3180.5207   | 5157.2940  | 5267.0592   |           |
| 372.5689                | -15831.0067 | -1750.0499 | 0.0000      | 0.0000    |
| 7737.6586               | 4134.0447   | 309.5450   | -3603.6139  | 4196.6285 |
| 309.4743                | -124.4484   | -152.7741  | 656151.2420 | -16.6198  |
| -16.6035                |             |            |             |           |
| [10280]ENERGY: 15300000 | 3208.0202   | 5221.9086  | 5268.3487   |           |
| 326.2269                | -15785.8151 | -1761.9902 | 0.0000      | 0.0000    |
| 7660.3555               | 4137.0546   | 306.4525   | -3523.3009  | 4197.1261 |
| 309.4694                | -17.8521    | 11.8552    | 656151.2420 | -22.4719  |
| -22.4754                |             |            |             |           |
| [10330]ENERGY: 15310000 | 3241.4102   | 5288.5093  | 5297.9588   |           |
| 313.0597                | -15985.6210 | -1757.6932 | 0.0000      | 0.0000    |
| 7735.2069               | 4132.8308   | 309.4469   | -3602.3761  | 4196.0259 |
| 309.4957                | -161.4664   | -112.1753  | 656151.2420 | -14.5352  |
| -14.5359                |             |            |             |           |
| [10366]ENERGY: 15320000 | 3166.9850   | 5278.4891  | 5313.2618   |           |
| 329.0617                | -15864.6450 | -1780.6592 | 0.0000      | 0.0000    |
| 7691.5044               | 4133.9978   | 307.6986   | -3557.5067  | 4195.8709 |
| 309.6150                | -197.8583   | -138.4283  | 656151.2420 | -11.7397  |
| -11.7349                |             |            |             |           |
| [10416]ENERGY: 15330000 | 3174.2381   | 5141.0022  | 5286.9433   |           |
| 332.7902                | -15833.5243 | -1743.4174 | 0.0000      | 0.0000    |
| 7773.2082               | 4131.2403   | 310.9672   | -3641.9680  | 4197.4780 |
| 309.5749                | -28.4677    | 37.6592    | 656151.2420 | -14.8862  |
| -14.8880                |             |            |             |           |
| [10452]ENERGY: 15340000 | 3270.9539   | 5270.0262  | 5220.6785   |           |
| 330.6336                | -15866.5504 | -1777.9216 | 0.0000      | 0.0000    |
| 7690.4455               | 4138.2656   | 307.6563   | -3552.1799  | 4197.2144 |
| 309.7380                | 3.6407      | -14.8062   | 656151.2420 | -11.9134  |
| -11.9075                |             |            |             |           |
| [10502]ENERGY: 15350000 | 3166.7609   | 5087.5403  | 5288.6679   |           |
| 339.1304                | -15764.8609 | -1808.9103 | 0.0000      | 0.0000    |
| 7824.3368               | 4132.6650   | 313.0126   | -3691.6718  | 4197.1485 |
| 309.7143                | 19.6899     | 16.1625    | 656151.2420 | -15.6131  |
| -15.6178                |             |            |             |           |
| [10538]ENERGY: 15360000 | 3132.2140   | 5273.9342  | 5295.5960   |           |
| 343.5479                | -15881.7753 | -1751.0706 | 0.0000      | 0.0000    |
| 7724.0884               | 4136.5346   | 309.0022   | -3587.5538  | 4196.9297 |
| 309.8790                | 108.4125    | 82.6596    | 656151.2420 | -17.3295  |
| -17.3161                |             |            |             |           |
| [10588]ENERGY: 15370000 | 3122.7672   | 5250.3724  | 5249.2436   |           |

## Supplementary Text 6

|                         |             |            |             |           |
|-------------------------|-------------|------------|-------------|-----------|
| 327.3262                | -15815.2371 | -1794.0410 | 0.0000      | 0.0000    |
| 7793.5451               | 4133.9764   | 311.7808   | -3659.5687  | 4195.4766 |
| 309.7406                | -29.8582    | -29.7049   | 656151.2420 | -10.9192  |
| -10.9332                |             |            |             |           |
| [10624]ENERGY: 15380000 | 3254.6900   | 5281.0606  | 5294.4169   |           |
| 355.5291                | -15965.5328 | -1829.4466 | 0.0000      | 0.0000    |
| 7742.2169               | 4132.9341   | 309.7274   | -3609.2828  | 4197.3017 |
| 309.7908                | -43.5907    | -44.6079   | 656151.2420 | -13.8934  |
| -13.8859                |             |            |             |           |
| [10674]ENERGY: 15390000 | 3232.2644   | 5265.5240  | 5281.5275   |           |
| 353.1827                | -15947.0165 | -1815.4883 | 0.0000      | 0.0000    |
| 7763.0840               | 4133.0778   | 310.5622   | -3630.0062  | 4198.0881 |
| 309.7554                | -49.1380    | -156.3780  | 656151.2420 | -15.4152  |
| -15.4332                |             |            |             |           |
| [10713]ENERGY: 15400000 | 3174.2930   | 5162.7990  | 5226.5333   |           |
| 295.6391                | -15905.9591 | -1697.2689 | 0.0000      | 0.0000    |
| 7875.9444               | 4131.9807   | 315.0772   | -3743.9637  | 4197.9365 |
| 309.9062                | 164.2346    | 124.4880   | 656151.2420 | -15.9799  |
| -15.9728                |             |            |             |           |
| [10763]ENERGY: 15410000 | 3229.7848   | 5312.8085  | 5273.5594   |           |
| 322.0290                | -15853.8992 | -1801.2083 | 0.0000      | 0.0000    |
| 7653.4830               | 4136.5573   | 306.1776   | -3516.9258  | 4198.6663 |
| 309.8665                | 70.4484     | 63.6472    | 656151.2420 | -19.7376  |
| -19.7300                |             |            |             |           |
| [10799]ENERGY: 15420000 | 3279.9906   | 5206.4901  | 5269.8500   |           |
| 336.6479                | -15792.8853 | -1825.8345 | 0.0000      | 0.0000    |
| 7666.7757               | 4141.0345   | 306.7094   | -3525.7413  | 4198.6009 |
| 309.8612                | -29.1883    | -40.2633   | 656151.2420 | -16.1927  |
| -16.1688                |             |            |             |           |
| [10849]ENERGY: 15430000 | 3106.1761   | 5203.1685  | 5293.3145   |           |
| 340.3542                | -15815.3439 | -1768.4186 | 0.0000      | 0.0000    |
| 7777.1599               | 4136.4108   | 311.1253   | -3640.7491  | 4199.7291 |
| 309.9159                | 79.1875     | -5.7981    | 656151.2420 | -15.6428  |
| -15.6718                |             |            |             |           |
| [10885]ENERGY: 15440000 | 3141.7860   | 5193.9828  | 5265.2637   |           |
| 339.6187                | -15830.7066 | -1781.9361 | 0.0000      | 0.0000    |
| 7806.2204               | 4134.2289   | 312.2878   | -3671.9915  | 4198.8013 |
| 310.0477                | 138.1709    | 147.0522   | 656151.2420 | -14.8304  |
| -14.8429                |             |            |             |           |
| [10935]ENERGY: 15450000 | 3199.4287   | 5189.5403  | 5212.9679   |           |
| 313.4749                | -15857.3451 | -1751.5948 | 0.0000      | 0.0000    |
| 7829.3900               | 4135.8621   | 313.2147   | -3693.5280  | 4197.5523 |
| 309.9666                | 107.6778    | 19.5424    | 656151.2420 | -17.7856  |
| -17.7720                |             |            |             |           |
| [10971]ENERGY: 15460000 | 3200.6656   | 5248.5754  | 5249.7882   |           |
| 339.2226                | -15934.0116 | -1766.7152 | 0.0000      | 0.0000    |
| 7799.5213               | 4137.0462   | 312.0198   | -3662.4751  | 4199.0208 |
| 310.0212                | 54.4917     | 7.7225     | 656151.2420 | -17.4177  |
| -17.4291                |             |            |             |           |
| [11021]ENERGY: 15470000 | 3184.9022   | 5187.6246  | 5291.8653   |           |
| 355.1029                | -15957.9016 | -1733.9928 | 0.0000      | 0.0000    |
| 7804.8246               | 4132.4252   | 312.2320   | -3672.3994  | 4198.2984 |
| 309.9443                | 76.0279     | 21.6653    | 656151.2420 | -20.6060  |
| -20.6044                |             |            |             |           |



## Supplementary Text 6

|                         |             |            |             |           |
|-------------------------|-------------|------------|-------------|-----------|
| [11057]ENERGY: 15480000 | 3201.4965   | 5252.6855  | 5287.1786   |           |
| 350.6876                | -15867.3570 | -1846.8294 | 0.0000      | 0.0000    |
| 7757.9952               | 4135.8569   | 310.3586   | -3622.1383  | 4200.0184 |
| 310.0883                | -79.3125    | -119.7407  | 656151.2420 | -12.9386  |
| -12.9370                |             |            |             |           |
| [11107]ENERGY: 15490000 | 3180.8327   | 5207.7369  | 5212.2969   |           |
| 336.9803                | -15765.0599 | -1733.7538 | 0.0000      | 0.0000    |
| 7696.0606               | 4135.0937   | 307.8809   | -3560.9669  | 4199.4365 |
| 309.9010                | -89.1218    | -73.2931   | 656151.2420 | -21.3684  |
| -21.3545                |             |            |             |           |
| [11146]ENERGY: 15500000 | 3236.2907   | 5204.3270  | 5305.1847   |           |
| 338.7180                | -15930.3246 | -1709.7037 | 0.0000      | 0.0000    |
| 7694.6613               | 4139.1534   | 307.8249   | -3555.5079  | 4201.0255 |
| 309.7710                | -76.6967    | -33.2622   | 656151.2420 | -19.0901  |
| -19.0997                |             |            |             |           |
| [11196]ENERGY: 15510000 | 3236.3674   | 5256.5759  | 5255.3410   |           |
| 336.4916                | -15798.0851 | -1836.8262 | 0.0000      | 0.0000    |
| 7687.6118               | 4137.4764   | 307.5429   | -3550.1354  | 4201.5411 |
| 310.0279                | -60.3637    | -122.9863  | 656151.2420 | -17.8424  |
| -17.8449                |             |            |             |           |
| [11232]ENERGY: 15520000 | 3198.1678   | 5277.2845  | 5296.5492   |           |
| 346.0378                | -15916.2549 | -1803.1186 | 0.0000      | 0.0000    |
| 7738.6197               | 4137.2856   | 309.5835   | -3601.3341  | 4199.3673 |
| 309.9813                | -222.6930   | -151.5936  | 656151.2420 | -19.3527  |
| -19.3248                |             |            |             |           |
| [11282]ENERGY: 15530000 | 3164.9627   | 5314.6950  | 5264.1147   |           |
| 351.8830                | -15950.1535 | -1764.3721 | 0.0000      | 0.0000    |
| 7755.6063               | 4136.7363   | 310.2630   | -3618.8700  | 4202.0588 |
| 310.2421                | 68.1923     | 18.9181    | 656151.2420 | -16.2367  |
| -16.2521                |             |            |             |           |
| [11318]ENERGY: 15540000 | 3211.3638   | 5190.6474  | 5273.0595   |           |
| 349.3031                | -15848.1168 | -1757.4792 | 0.0000      | 0.0000    |
| 7719.9527               | 4138.7304   | 308.8367   | -3581.2223  | 4202.3939 |
| 310.1249                | 16.7450     | -20.5204   | 656151.2420 | -16.6503  |
| -16.6731                |             |            |             |           |
| [11368]ENERGY: 15550000 | 3256.7685   | 5165.9542  | 5239.8495   |           |
| 324.3054                | -15883.6665 | -1817.7831 | 0.0000      | 0.0000    |
| 7852.2840               | 4137.7118   | 314.1306   | -3714.5721  | 4202.8719 |
| 310.3021                | -0.0181     | -58.9627   | 656151.2420 | -16.6707  |
| -16.6430                |             |            |             |           |
| [11404]ENERGY: 15560000 | 3266.4233   | 5242.4691  | 5228.8872   |           |
| 324.1398                | -15868.5003 | -1813.9480 | 0.0000      | 0.0000    |
| 7762.4192               | 4141.8903   | 310.5356   | -3620.5289  | 4203.6038 |
| 310.2476                | -154.2227   | -167.8101  | 656151.2420 | -14.6181  |
| -14.6235                |             |            |             |           |
| [11454]ENERGY: 15570000 | 3142.4788   | 5252.9261  | 5344.7506   |           |
| 338.8671                | -15822.0659 | -1823.9156 | 0.0000      | 0.0000    |
| 7709.4016               | 4142.4428   | 308.4146   | -3566.9589  | 4203.4366 |
| 310.1240                | 48.6890     | 71.3696    | 656151.2420 | -20.4908  |
| -20.4931                |             |            |             |           |
| [11490]ENERGY: 15580000 | 3235.3707   | 5178.2149  | 5261.7162   |           |
| 335.9854                | -15853.3600 | -1746.2226 | 0.0000      | 0.0000    |
| 7730.1778               | 4141.8823   | 309.2458   | -3588.2955  | 4203.8556 |
| 310.3515                | 146.9470    | 149.6891   | 656151.2420 | -14.5930  |

Supplementary Text 6

-14.5966  
 [11540]ENERGY: 15590000      3279.3185      5292.0221      5254.8499  
 331.3829      -15928.4642      -1743.0724      0.0000      0.0000  
 7656.7573      4142.7941      306.3086      -3513.9632      4202.1869  
 310.1933      64.0655      37.8008      656151.2420      -22.9038  
 -22.8966  
 [11579]ENERGY: 15600000      3129.8310      5228.2219      5302.7099  
 318.2142      -15857.0427      -1748.7003      0.0000      0.0000  
 7767.7775      4141.0114      310.7499      -3626.7661      4202.1542  
 310.1205      148.7463      127.1929      656151.2420      -14.9942  
 -14.9866  
 [11629]ENERGY: 15610000      3272.0665      5240.3336      5253.2611  
 328.2097      -15874.5751      -1774.3207      0.0000      0.0000  
 7695.5872      4140.5623      307.8620      -3555.0249      4202.8155  
 310.0817      -69.9049      -69.3827      656151.2420      -11.4174  
 -11.4406  
 [11665]ENERGY: 15620000      3159.8634      5294.0675      5281.0135  
 344.7142      -15887.3675      -1820.9557      0.0000      0.0000  
 7769.2382      4140.5735      310.8084      -3628.6647      4204.1555  
 310.2276      -53.5223      -81.9443      656151.2420      -17.1966  
 -17.1732  
 [11715]ENERGY: 15630000      3290.5741      5200.4686      5268.3093  
 343.5858      -15905.4753      -1793.8928      0.0000      0.0000  
 7737.4508      4141.0205      309.5367      -3596.4303      4204.6220  
 310.1895      -207.0468      -154.3625      656151.2420      -16.9965  
 -17.0088  
 [11751]ENERGY: 15640000      3195.3788      5217.3244      5285.2506  
 339.3730      -15866.6809      -1774.6296      0.0000      0.0000  
 7747.2240      4143.2403      309.9277      -3603.9837      4204.9601  
 310.3007      82.3083      36.8888      656151.2420      -16.7473  
 -16.7611  
 [11801]ENERGY: 15650000      3246.8528      5255.7471      5271.0370  
 316.5139      -15964.5924      -1766.3623      0.0000      0.0000  
 7779.3026      4138.4986      311.2110      -3640.8039      4204.2338  
 310.3151      46.7442      16.9912      656151.2420      -17.3017  
 -17.3160  
 [11837]ENERGY: 15660000      3211.1489      5198.2603      5265.9203  
 340.8786      -15911.2255      -1754.2211      0.0000      0.0000  
 7789.6834      4140.4449      311.6263      -3649.2385      4204.9761  
 310.3667      88.8413      30.1210      656151.2420      -11.9406  
 -11.9392  
 [11887]ENERGY: 15670000      3214.5538      5125.2080      5274.9926  
 326.0042      -15844.9501      -1778.8906      0.0000      0.0000  
 7824.3911      4141.3089      313.0148      -3683.0822      4205.3840  
 310.1074      38.7070      46.1110      656151.2420      -17.2651  
 -17.2366  
 [11923]ENERGY: 15680000      3166.7413      5282.8659      5271.6444  
 353.7825      -15861.8950      -1777.0342      0.0000      0.0000  
 7709.1469      4145.2517      308.4044      -3563.8952      4205.8578  
 310.2439      134.1898      93.4336      656151.2420      -12.6480  
 -12.6481  
 [11973]ENERGY: 15690000      3157.5220      5286.7141      5262.9960  
 319.7882      -15923.4855      -1744.8788      0.0000      0.0000  
 7784.5598      4143.2160      311.4213      -3641.3439      4204.7405

## Supplementary Text 6

|                         |             |            |             |           |
|-------------------------|-------------|------------|-------------|-----------|
| 310.2109                | -114.7501   | -118.7371  | 656151.2420 | -17.6428  |
| -17.6436                |             |            |             |           |
| [12012]ENERGY: 15700000 | 3203.7807   | 5215.7129  | 5213.2650   |           |
| 323.3984                | -15860.8420 | -1735.2088 | 0.0000      | 0.0000    |
| 7781.9249               | 4142.0312   | 311.3159   | -3639.8937  | 4205.4781 |
| 310.2428                | -71.6613    | 3.9417     | 656151.2420 | -12.1539  |
| -12.1511                |             |            |             |           |
| [12062]ENERGY: 15710000 | 3171.5450   | 5132.4786  | 5301.1605   |           |
| 341.9587                | -15825.1288 | -1800.9125 | 0.0000      | 0.0000    |
| 7821.3405               | 4142.4420   | 312.8927   | -3678.8985  | 4205.9269 |
| 310.2067                | -53.2847    | 19.8599    | 656151.2420 | -16.1175  |
| -16.1199                |             |            |             |           |
| [12098]ENERGY: 15720000 | 3171.1419   | 5233.3901  | 5271.3914   |           |
| 335.6478                | -15840.8218 | -1807.8118 | 0.0000      | 0.0000    |
| 7777.5661               | 4140.5037   | 311.1415   | -3637.0624  | 4206.1344 |
| 310.1113                | -123.0890   | -10.6508   | 656151.2420 | -16.1349  |
| -16.1324                |             |            |             |           |
| [12148]ENERGY: 15730000 | 3224.8867   | 5195.7430  | 5241.2180   |           |
| 325.7980                | -15841.0864 | -1844.1051 | 0.0000      | 0.0000    |
| 7842.8560               | 4145.3103   | 313.7535   | -3697.5458  | 4207.0614 |
| 310.0998                | -135.4974   | -127.6669  | 656151.2420 | -18.0876  |
| -18.0852                |             |            |             |           |
| [12184]ENERGY: 15740000 | 3259.9262   | 5235.6330  | 5237.8152   |           |
| 328.7388                | -15848.3882 | -1810.0042 | 0.0000      | 0.0000    |
| 7735.8727               | 4139.5935   | 309.4736   | -3596.2792  | 4206.1249 |
| 310.1987                | -129.7306   | -109.1490  | 656151.2420 | -17.5167  |
| -17.5243                |             |            |             |           |
| [12234]ENERGY: 15750000 | 3190.4319   | 5236.7658  | 5298.0838   |           |
| 371.0626                | -15938.9493 | -1716.8012 | 0.0000      | 0.0000    |
| 7702.1705               | 4142.7640   | 308.1253   | -3559.4064  | 4205.6983 |
| 310.4291                | 42.3225     | 24.9694    | 656151.2420 | -16.0620  |
| -16.0671                |             |            |             |           |
| [12270]ENERGY: 15760000 | 3191.3863   | 5237.5991  | 5271.6435   |           |
| 349.7180                | -15860.6804 | -1774.1825 | 0.0000      | 0.0000    |
| 7730.2062               | 4145.6902   | 309.2469   | -3584.5160  | 4207.0969 |
| 310.5035                | 67.9215     | -9.9616    | 656151.2420 | -18.3968  |
| -18.3914                |             |            |             |           |
| [12320]ENERGY: 15770000 | 3232.5135   | 5218.4131  | 5304.3078   |           |
| 359.3269                | -15884.2032 | -1769.5007 | 0.0000      | 0.0000    |
| 7689.6545               | 4150.5118   | 307.6246   | -3539.1426  | 4207.9085 |
| 310.1756                | 53.1951     | -7.8352    | 656151.2420 | -13.6231  |
| -13.6233                |             |            |             |           |
| [12356]ENERGY: 15780000 | 3157.7406   | 5276.8231  | 5277.8430   |           |
| 349.7022                | -15848.2933 | -1771.9432 | 0.0000      | 0.0000    |
| 7702.5753               | 4144.4478   | 308.1415   | -3558.1275  | 4208.6091 |
| 310.2822                | 100.4339    | 83.5128    | 656151.2420 | -17.7171  |
| -17.7178                |             |            |             |           |
| [12406]ENERGY: 15790000 | 3179.4557   | 5245.1848  | 5284.3395   |           |
| 323.5706                | -15792.4344 | -1825.0181 | 0.0000      | 0.0000    |
| 7733.0836               | 4148.1817   | 309.3620   | -3584.9018  | 4208.4560 |
| 310.1833                | 151.1118    | 20.3719    | 656151.2420 | -17.4475  |
| -17.4492                |             |            |             |           |
| [12445]ENERGY: 15800000 | 3245.9259   | 5225.9102  | 5310.4113   |           |
| 346.9632                | -16025.5509 | -1652.8565 | 0.0000      | 0.0000    |

## Supplementary Text 6

|                         |             |            |             |           |
|-------------------------|-------------|------------|-------------|-----------|
| 7693.8863               | 4144.6895   | 307.7939   | -3549.1968  | 4207.5308 |
| 310.2981                | 20.3327     | -7.3791    | 656151.2420 | -13.7771  |
| -13.7770                |             |            |             |           |
| [12495]ENERGY: 15810000 | 3246.1578   | 5191.9488  | 5274.7952   |           |
| 344.1938                | -15857.1817 | -1772.9316 | 0.0000      | 0.0000    |
| 7720.7236               | 4147.7059   | 308.8675   | -3573.0177  | 4208.4157 |
| 310.2439                | -94.7861    | -84.5576   | 656151.2420 | -16.4830  |
| -16.4898                |             |            |             |           |
| [12531]ENERGY: 15820000 | 3180.9429   | 5154.3688  | 5307.7051   |           |
| 340.6395                | -15757.6779 | -1855.0534 | 0.0000      | 0.0000    |
| 7774.6641               | 4145.5891   | 311.0254   | -3629.0750  | 4209.3397 |
| 310.2754                | -82.9351    | -32.1413   | 656151.2420 | -17.8863  |
| -17.8749                |             |            |             |           |
| [12581]ENERGY: 15830000 | 3260.8482   | 5189.7534  | 5304.9902   |           |
| 356.0052                | -15809.6504 | -1778.0302 | 0.0000      | 0.0000    |
| 7626.0460               | 4149.9624   | 305.0800   | -3476.0836  | 4208.4905 |
| 310.2466                | 97.9659     | 41.9625    | 656151.2420 | -15.0428  |
| -15.0345                |             |            |             |           |
| [12617]ENERGY: 15840000 | 3212.2374   | 5232.9432  | 5294.3772   |           |
| 347.2538                | -15829.9428 | -1810.7337 | 0.0000      | 0.0000    |
| 7700.4463               | 4146.5815   | 308.0564   | -3553.8648  | 4207.0230 |
| 310.3069                | -32.3724    | -85.8382   | 656151.2420 | -16.0341  |
| -16.0431                |             |            |             |           |
| [12667]ENERGY: 15850000 | 3234.2870   | 5234.0673  | 5292.7782   |           |
| 338.8473                | -15861.8296 | -1773.7832 | 0.0000      | 0.0000    |
| 7682.6617               | 4147.0285   | 307.3449   | -3535.6332  | 4208.3854 |
| 310.0284                | -98.3756    | -92.9850   | 656151.2420 | -17.3777  |
| -17.3730                |             |            |             |           |
| [12703]ENERGY: 15860000 | 3187.5045   | 5272.0694  | 5242.9410   |           |
| 337.3831                | -15850.5612 | -1737.7097 | 0.0000      | 0.0000    |
| 7694.5689               | 4146.1961   | 307.8212   | -3548.3729  | 4208.8523 |
| 310.2159                | 110.1428    | 182.4128   | 656151.2420 | -14.9731  |
| -14.9789                |             |            |             |           |
| [12753]ENERGY: 15870000 | 3201.9036   | 5154.6742  | 5314.7510   |           |
| 341.4754                | -15792.5307 | -1800.1270 | 0.0000      | 0.0000    |
| 7730.0353               | 4150.1819   | 309.2401   | -3579.8534  | 4210.8885 |
| 310.2448                | 74.7569     | -14.7167   | 656151.2420 | -19.3924  |
| -19.3960                |             |            |             |           |
| [12789]ENERGY: 15880000 | 3236.2363   | 5314.8028  | 5324.4532   |           |
| 357.4800                | -16000.7275 | -1756.1764 | 0.0000      | 0.0000    |
| 7671.6573               | 4147.7257   | 306.9046   | -3523.9316  | 4210.6815 |
| 310.1464                | -61.6729    | -81.1576   | 656151.2420 | -23.1854  |
| -23.1837                |             |            |             |           |
| [12839]ENERGY: 15890000 | 3176.0824   | 5152.7562  | 5236.2460   |           |
| 352.6313                | -15774.6266 | -1812.8448 | 0.0000      | 0.0000    |
| 7817.0852               | 4147.3295   | 312.7225   | -3669.7557  | 4210.7865 |
| 310.4019                | -67.7327    | -56.3118   | 656151.2420 | -16.5338  |
| -16.5140                |             |            |             |           |
| [12878]ENERGY: 15900000 | 3239.4665   | 5267.2842  | 5237.8708   |           |
| 356.2474                | -15819.8613 | -1763.0227 | 0.0000      | 0.0000    |
| 7636.1541               | 4154.1389   | 305.4843   | -3482.0151  | 4211.3322 |
| 310.3082                | -161.8566   | -113.0841  | 656151.2420 | -14.5448  |
| -14.5750                |             |            |             |           |
| [12928]ENERGY: 15910000 | 3190.0465   | 5214.3967  | 5247.0703   |           |

## Supplementary Text 6

|                         |             |            |             |           |
|-------------------------|-------------|------------|-------------|-----------|
| 342.3653                | -15885.0068 | -1690.6924 | 0.0000      | 0.0000    |
| 7732.3974               | 4150.5772   | 309.3346   | -3581.8203  | 4210.2160 |
| 310.0944                | 82.0270     | 9.9135     | 656151.2420 | -18.2430  |
| -18.2138                |             |            |             |           |
| [12964]ENERGY: 15920000 | 3169.0607   | 5178.4762  | 5253.7526   |           |
| 346.5287                | -15858.7694 | -1751.3286 | 0.0000      | 0.0000    |
| 7807.8892               | 4145.6094   | 312.3546   | -3662.2798  | 4210.3840 |
| 310.2036                | 34.8264     | 77.7325    | 656151.2420 | -11.1765  |
| -11.2041                |             |            |             |           |
| [13014]ENERGY: 15930000 | 3209.0426   | 5234.7941  | 5306.4755   |           |
| 330.4125                | -15848.7733 | -1804.0129 | 0.0000      | 0.0000    |
| 7721.1199               | 4149.0585   | 308.8834   | -3572.0614  | 4211.3255 |
| 310.1362                | -73.5577    | -90.7440   | 656151.2420 | -19.4254  |
| -19.4117                |             |            |             |           |
| [13050]ENERGY: 15940000 | 3254.2007   | 5231.5298  | 5243.2142   |           |
| 328.4639                | -15801.7814 | -1781.0918 | 0.0000      | 0.0000    |
| 7674.5035               | 4149.0388   | 307.0185   | -3525.4647  | 4211.5812 |
| 310.2787                | -83.4127    | -62.2990   | 656151.2420 | -12.1705  |
| -12.1671                |             |            |             |           |
| [13100]ENERGY: 15950000 | 3195.1226   | 5134.1667  | 5240.0338   |           |
| 346.8476                | -15817.3022 | -1753.9846 | 0.0000      | 0.0000    |
| 7802.9245               | 4147.8083   | 312.1560   | -3655.1162  | 4210.7423 |
| 310.2981                | -28.7451    | -90.6165   | 656151.2420 | -16.7020  |
| -16.7164                |             |            |             |           |
| [13136]ENERGY: 15960000 | 3139.0780   | 5256.8336  | 5296.9301   |           |
| 355.1664                | -15756.1379 | -1860.3666 | 0.0000      | 0.0000    |
| 7717.3704               | 4148.8740   | 308.7334   | -3568.4964  | 4212.3768 |
| 310.1022                | -2.3887     | 26.4917    | 656151.2420 | -22.5327  |
| -22.4966                |             |            |             |           |
| [13186]ENERGY: 15970000 | 3223.3357   | 5206.2757  | 5309.7620   |           |
| 323.7395                | -15858.8117 | -1795.1874 | 0.0000      | 0.0000    |
| 7741.6802               | 4150.7940   | 309.7059   | -3590.8862  | 4211.1299 |
| 310.0952                | -77.5198    | -103.7121  | 656151.2420 | -17.5275  |
| -17.5626                |             |            |             |           |
| [13222]ENERGY: 15980000 | 3182.9397   | 5283.2721  | 5281.4045   |           |
| 328.3615                | -15924.3452 | -1793.5830 | 0.0000      | 0.0000    |
| 7789.1898               | 4147.2395   | 311.6065   | -3641.9504  | 4211.1827 |
| 310.0526                | -0.4010     | -85.8878   | 656151.2420 | -21.7959  |
| -21.7892                |             |            |             |           |
| [13272]ENERGY: 15990000 | 3159.6914   | 5320.3574  | 5263.2305   |           |
| 350.8320                | -15859.4804 | -1788.6709 | 0.0000      | 0.0000    |
| 7704.0841               | 4150.0441   | 308.2019   | -3554.0400  | 4211.0950 |
| 310.1917                | -31.9954    | -31.7243   | 656151.2420 | -23.5930  |
| -23.5937                |             |            |             |           |
| [13311]ENERGY: 16000000 | 3326.9996   | 5213.6788  | 5274.6319   |           |
| 327.9817                | -15812.3518 | -1883.2111 | 0.0000      | 0.0000    |
| 7705.7164               | 4153.4456   | 308.2672   | -3552.2709  | 4211.7459 |
| 310.0182                | -132.9502   | -183.5554  | 656151.2420 | -21.4491  |
| -21.4488                |             |            |             |           |
| [13361]ENERGY: 16010000 | 3259.2583   | 5207.4556  | 5301.0723   |           |
| 336.2511                | -15861.9492 | -1793.5630 | 0.0000      | 0.0000    |
| 7702.0194               | 4150.5446   | 308.1193   | -3551.4748  | 4211.4174 |
| 309.9358                | -12.9100    | 6.2862     | 656151.2420 | -25.5962  |
| -25.5840                |             |            |             |           |

## Supplementary Text 6

|                         |             |            |             |
|-------------------------|-------------|------------|-------------|
| [13397]ENERGY: 16020000 | 3208.9861   | 5203.0749  | 5268.4407   |
| 349.3763                | -15794.1626 | -1853.2760 | 0.0000      |
| 7764.9490               | 4147.3884   | 310.6368   | -3617.5607  |
| 310.1225                | -68.3610    | -107.7584  | 656151.2420 |
| -14.5201                |             |            | -14.5123    |
| [13447]ENERGY: 16030000 | 3144.5403   | 5253.9820  | 5282.6416   |
| 346.9524                | -15852.8306 | -1757.3957 | 0.0000      |
| 7729.7954               | 4147.6856   | 309.2305   | -3582.1099  |
| 310.1118                | 11.1019     | -47.2036   | 656151.2420 |
| -22.1043                |             |            | -22.0876    |
| [13483]ENERGY: 16040000 | 3173.9066   | 5230.0384  | 5231.8467   |
| 336.0778                | -15871.0904 | -1800.6996 | 0.0000      |
| 7847.8531               | 4147.9327   | 313.9534   | -3699.9205  |
| 310.1770                | 107.9071    | 61.7320    | 656151.2420 |
| -18.3763                |             |            | -18.3773    |
| [13533]ENERGY: 16050000 | 3143.7528   | 5269.7531  | 5295.6445   |
| 333.7699                | -15924.9177 | -1721.2217 | 0.0000      |
| 7751.5172               | 4148.2981   | 310.0994   | -3603.2191  |
| 310.0908                | 98.7981     | 38.3104    | 656151.2420 |
| -14.0329                |             |            | -14.0388    |
| [13569]ENERGY: 16060000 | 3187.2184   | 5278.6076  | 5249.9989   |
| 341.1400                | -15868.1154 | -1775.1172 | 0.0000      |
| 7733.6349               | 4147.3672   | 309.3841   | -3586.2677  |
| 310.1311                | 48.1130     | -5.0635    | 656151.2420 |
| -16.1337                |             |            | -16.1412    |
| [13619]ENERGY: 16070000 | 3131.0753   | 5267.5027  | 5292.5542   |
| 367.6281                | -15805.0782 | -1835.2154 | 0.0000      |
| 7733.5060               | 4151.9727   | 309.3789   | -3581.5333  |
| 310.2723                | -28.9048    | -85.4466   | 656151.2420 |
| -16.1405                |             |            | -16.1489    |
| [13655]ENERGY: 16080000 | 3170.2004   | 5261.6851  | 5290.0323   |
| 312.1626                | -15915.2639 | -1761.0666 | 0.0000      |
| 7793.4056               | 4151.1556   | 311.7752   | -3642.2500  |
| 310.1719                | 53.3761     | 57.0187    | 656151.2420 |
| -18.2879                |             |            | -18.2664    |
| [13705]ENERGY: 16090000 | 3220.3680   | 5275.7716  | 5258.5428   |
| 336.1909                | -15920.6205 | -1761.6891 | 0.0000      |
| 7741.0595               | 4149.6232   | 309.6811   | -3591.4363  |
| 310.3668                | 61.7626     | 35.9863    | 656151.2420 |
| -22.0578                |             |            | -22.0593    |
| [13744]ENERGY: 16100000 | 3233.3093   | 5261.9833  | 5262.0881   |
| 335.7412                | -15926.4416 | -1775.8183 | 0.0000      |
| 7759.3992               | 4150.2612   | 310.4148   | -3609.1380  |
| 310.3187                | 37.4046     | 16.9874    | 656151.2420 |
| -16.5074                |             |            | -16.5184    |
| [13794]ENERGY: 16110000 | 3229.9388   | 5224.1359  | 5254.9514   |
| 331.2115                | -15779.4471 | -1831.4876 | 0.0000      |
| 7719.8771               | 4149.1801   | 308.8337   | -3570.6971  |
| 310.3584                | -98.3403    | -96.4379   | 656151.2420 |
| -12.3575                |             |            | -12.3452    |
| [13830]ENERGY: 16120000 | 3205.1178   | 5270.4875  | 5243.3206   |
| 338.7323                | -15899.6613 | -1787.5767 | 0.0000      |
| 7777.2529               | 4147.6729   | 311.1290   | -3629.5799  |
| 310.3278                | -117.9621   | -16.4292   | 656151.2420 |
|                         |             |            | -17.3461    |

## Supplementary Text 6

-17.3298  
[13880]ENERGY: 16130000 3190.6545 5237.2909 5282.9477  
348.5539 -15878.0012 -1733.6228 0.0000 0.0000  
7706.8521 4154.6752 308.3126 -3552.1770 4215.2883  
310.3015 14.7983 37.4683 656151.2420 -12.1012  
-12.0958  
[13916]ENERGY: 16140000 3204.7934 5176.9085 5261.0211  
331.2118 -15787.5932 -1809.7111 0.0000 0.0000  
7776.6392 4153.2698 311.1044 -3623.3694 4215.0254  
310.3494 -70.3200 22.1151 656151.2420 -21.6596  
-21.6637  
[13966]ENERGY: 16150000 3217.5161 5138.5176 5310.7634  
359.1545 -15764.5062 -1815.3244 0.0000 0.0000  
7706.8975 4153.0185 308.3144 -3553.8790 4215.0322  
310.5067 55.3203 20.9922 656151.2420 -9.8558  
-9.8526  
[14002]ENERGY: 16160000 3179.5736 5197.6405 5255.2586  
348.0328 -15875.5939 -1752.4701 0.0000 0.0000  
7799.7990 4152.2405 312.0310 -3647.5585 4214.1094  
310.3548 89.6764 134.2696 656151.2420 -20.8323  
-20.8425  
[14052]ENERGY: 16170000 3093.1294 5283.5864 5232.5576  
363.2840 -15839.5407 -1765.6970 0.0000 0.0000  
7783.6448 4150.9643 311.3847 -3632.6805 4215.6793  
310.2269 68.8306 79.2915 656151.2420 -22.7333  
-22.7344  
[14088]ENERGY: 16180000 3214.7873 5301.7827 5268.8628  
341.9752 -15930.0597 -1732.5101 0.0000 0.0000  
7690.8743 4155.7125 307.6734 -3535.1618 4214.6134  
310.0362 60.1923 56.9560 656151.2420 -19.7771  
-19.7640  
[14138]ENERGY: 16190000 3176.5097 5279.8290 5310.4769  
342.7753 -15820.5096 -1782.1786 0.0000 0.0000  
7650.5174 4157.4201 306.0589 -3493.0973 4214.2203  
310.3209 191.5206 66.9764 656151.2420 -17.3541  
-17.3857  
[14177]ENERGY: 16200000 3156.5079 5252.0015 5288.0534  
337.0391 -15854.8076 -1814.2917 0.0000 0.0000  
7785.5205 4150.0232 311.4597 -3635.4973 4215.0152  
310.2683 -75.0564 -99.9981 656151.2420 -18.0731  
-18.0507  
[14227]ENERGY: 16210000 3230.0655 5307.9048 5260.2880  
356.8659 -15957.2290 -1747.3620 0.0000 0.0000  
7706.4529 4156.9861 308.2966 -3549.4668 4215.8368  
310.0848 21.4747 -8.3462 656151.2420 -11.1570  
-11.1533  
[14263]ENERGY: 16220000 3227.2256 5193.1469 5307.6625  
342.6698 -15809.7247 -1828.6239 0.0000 0.0000  
7720.5772 4152.9334 308.8617 -3567.6439 4215.5142  
310.3274 -69.9566 -64.6393 656151.2420 -15.4882  
-15.4934  
[14313]ENERGY: 16230000 3214.7654 5091.5759 5285.9363  
338.8699 -15819.3770 -1776.6110 0.0000 0.0000  
7817.0000 4152.1595 312.7191 -3664.8405 4215.0866

## Supplementary Text 6

|                         |             |            |             |           |
|-------------------------|-------------|------------|-------------|-----------|
| 310.4652                | -62.2755    | -102.9838  | 656151.2420 | -16.1583  |
| -16.1715                |             |            |             |           |
| [14349]ENERGY: 16240000 | 3184.4784   | 5141.3599  | 5297.4565   |           |
| 352.3387                | -15856.1819 | -1764.2980 | 0.0000      | 0.0000    |
| 7797.3091               | 4152.4628   | 311.9313   | -3644.8463  | 4216.4632 |
| 310.4895                | 159.3525    | 134.0835   | 656151.2420 | -15.1619  |
| -15.1418                |             |            |             |           |
| [14399]ENERGY: 16250000 | 3262.8548   | 5304.4159  | 5201.3398   |           |
| 348.4979                | -15885.9889 | -1788.1847 | 0.0000      | 0.0000    |
| 7712.6950               | 4155.6298   | 308.5464   | -3557.0652  | 4216.7782 |
| 310.3535                | -0.7921     | 27.8499    | 656151.2420 | -13.6248  |
| -13.6340                |             |            |             |           |
| [14435]ENERGY: 16260000 | 3198.6403   | 5207.5777  | 5265.6356   |           |
| 322.8549                | -15876.2133 | -1717.8650 | 0.0000      | 0.0000    |
| 7754.5444               | 4155.1747   | 310.2205   | -3599.3698  | 4217.0617 |
| 310.4848                | 174.2353    | 121.3323   | 656151.2420 | -15.4948  |
| -15.4871                |             |            |             |           |
| [14485]ENERGY: 16270000 | 3143.7348   | 5262.9235  | 5258.6313   |           |
| 350.9489                | -15833.3868 | -1742.2181 | 0.0000      | 0.0000    |
| 7715.2022               | 4155.8358   | 308.6467   | -3559.3664  | 4217.6669 |
| 310.3343                | -100.7099   | -60.1741   | 656151.2420 | -15.0270  |
| -15.0206                |             |            |             |           |
| [14521]ENERGY: 16280000 | 3186.7800   | 5259.5366  | 5267.0371   |           |
| 374.7773                | -15826.0207 | -1818.0992 | 0.0000      | 0.0000    |
| 7714.0748               | 4158.0859   | 308.6016   | -3555.9889  | 4218.8474 |
| 310.3574                | -34.3348    | -73.7867   | 656151.2420 | -18.0109  |
| -18.0302                |             |            |             |           |
| [14571]ENERGY: 16290000 | 3145.0025   | 5199.7414  | 5271.1349   |           |
| 366.1929                | -15769.8109 | -1775.2945 | 0.0000      | 0.0000    |
| 7716.4958               | 4153.4622   | 308.6984   | -3563.0335  | 4217.8939 |
| 310.4129                | 78.9065     | 39.7852    | 656151.2420 | -12.9787  |
| -12.9765                |             |            |             |           |
| [14610]ENERGY: 16300000 | 3231.0951   | 5273.9224  | 5264.2542   |           |
| 346.1751                | -15873.1363 | -1790.9501 | 0.0000      | 0.0000    |
| 7705.6599               | 4157.0203   | 308.2649   | -3548.6396  | 4218.3571 |
| 310.2637                | -0.4762     | 11.1386    | 656151.2420 | -21.0709  |
| -21.0537                |             |            |             |           |
| [14660]ENERGY: 16310000 | 3128.4274   | 5181.5292  | 5286.9142   |           |
| 340.6724                | -15895.3218 | -1722.6625 | 0.0000      | 0.0000    |
| 7833.0606               | 4152.6195   | 313.3616   | -3680.4410  | 4218.2353 |
| 310.3006                | -53.3581    | -79.1721   | 656151.2420 | -14.6387  |
| -14.6524                |             |            |             |           |
| [14696]ENERGY: 16320000 | 3200.2694   | 5148.0676  | 5236.4179   |           |
| 365.7270                | -15898.1756 | -1767.1567 | 0.0000      | 0.0000    |
| 7867.2166               | 4152.3663   | 314.7280   | -3714.8503  | 4217.3623 |
| 310.4239                | -119.7658   | -43.4047   | 656151.2420 | -19.1023  |
| -19.0925                |             |            |             |           |
| [14746]ENERGY: 16330000 | 3218.3326   | 5152.5271  | 5276.9423   |           |
| 334.8737                | -15816.1666 | -1811.0993 | 0.0000      | 0.0000    |
| 7798.3540               | 4153.7638   | 311.9732   | -3644.5902  | 4219.2870 |
| 310.4408                | 62.5629     | -30.9485   | 656151.2420 | -12.8362  |
| -12.8510                |             |            |             |           |
| [14782]ENERGY: 16340000 | 3202.3630   | 5181.1587  | 5261.3146   |           |
| 336.3601                | -15840.9662 | -1701.2150 | 0.0000      | 0.0000    |



## Supplementary Text 6

|                         |             |            |             |           |
|-------------------------|-------------|------------|-------------|-----------|
| 7717.5997               | 4156.6150   | 308.7426   | -3560.9848  | 4218.5031 |
| 310.5832                | -90.5804    | -61.7963   | 656151.2420 | -15.9182  |
| -15.9217                |             |            |             |           |
| [14832]ENERGY: 16350000 | 3140.2531   | 5388.5026  | 5244.2858   |           |
| 327.7194                | -15892.5126 | -1823.7482 | 0.0000      | 0.0000    |
| 7773.9583               | 4158.4584   | 310.9972   | -3615.4999  | 4219.5611 |
| 310.6573                | -32.0144    | -124.1003  | 656151.2420 | -16.1604  |
| -16.1620                |             |            |             |           |
| [14868]ENERGY: 16360000 | 3225.4955   | 5238.3774  | 5194.1315   |           |
| 341.8582                | -15830.9887 | -1825.3079 | 0.0000      | 0.0000    |
| 7814.0218               | 4157.5878   | 312.5999   | -3656.4340  | 4219.2539 |
| 310.4601                | -118.2843   | -79.2974   | 656151.2420 | -13.1382  |
| -13.1241                |             |            |             |           |
| [14918]ENERGY: 16370000 | 3174.3613   | 5202.2183  | 5269.0313   |           |
| 341.2484                | -15771.9910 | -1849.7450 | 0.0000      | 0.0000    |
| 7791.9093               | 4157.0326   | 311.7153   | -3634.8767  | 4219.3875 |
| 310.2870                | 204.6939    | 96.9699    | 656151.2420 | -14.6021  |
| -14.5968                |             |            |             |           |
| [14954]ENERGY: 16380000 | 3197.3396   | 5163.4614  | 5315.6702   |           |
| 347.7947                | -15877.0824 | -1778.0830 | 0.0000      | 0.0000    |
| 7788.0900               | 4157.1906   | 311.5625   | -3630.8994  | 4220.2409 |
| 310.4189                | 149.4232    | 101.9557   | 656151.2420 | -16.2772  |
| -16.2955                |             |            |             |           |
| [15004]ENERGY: 16390000 | 3229.9035   | 5223.0666  | 5293.9156   |           |
| 337.8419                | -15877.7453 | -1794.4580 | 0.0000      | 0.0000    |
| 7744.7495               | 4157.2738   | 309.8287   | -3587.4757  | 4221.2600 |
| 310.3255                | 40.6939     | 42.8174    | 656151.2420 | -17.8638  |
| -17.8610                |             |            |             |           |
| [15043]ENERGY: 16400000 | 3245.2016   | 5210.5828  | 5232.5423   |           |
| 344.0595                | -15820.6685 | -1842.9057 | 0.0000      | 0.0000    |
| 7785.8996               | 4154.7116   | 311.4749   | -3631.1880  | 4220.5404 |
| 310.5031                | -41.9954    | -84.5608   | 656151.2420 | -15.5632  |
| -15.5457                |             |            |             |           |
| [15093]ENERGY: 16410000 | 3154.3444   | 5244.5517  | 5292.9481   |           |
| 360.9805                | -15815.3381 | -1790.4141 | 0.0000      | 0.0000    |
| 7714.6295               | 4161.7019   | 308.6238   | -3552.9276  | 4220.6646 |
| 310.1885                | 25.5295     | 69.3287    | 656151.2420 | -19.4041  |
| -19.4143                |             |            |             |           |
| [15129]ENERGY: 16420000 | 3196.1788   | 5238.9900  | 5268.3014   |           |
| 342.8252                | -15871.1026 | -1767.1099 | 0.0000      | 0.0000    |
| 7747.4759               | 4155.5588   | 309.9378   | -3591.9170  | 4219.7151 |
| 310.1835                | -31.9746    | -38.1214   | 656151.2420 | -20.9850  |
| -20.9829                |             |            |             |           |
| [15179]ENERGY: 16430000 | 3251.2065   | 5285.6006  | 5274.0654   |           |
| 340.6769                | -15842.6580 | -1837.7906 | 0.0000      | 0.0000    |
| 7684.8848               | 4155.9855   | 307.4338   | -3528.8993  | 4220.5860 |
| 310.3832                | 77.2970     | 69.1814    | 656151.2420 | -18.7874  |
| -18.7848                |             |            |             |           |
| [15215]ENERGY: 16440000 | 3286.1452   | 5183.8455  | 5286.4887   |           |
| 350.9548                | -15830.8025 | -1770.9673 | 0.0000      | 0.0000    |
| 7658.1309               | 4163.7952   | 306.3635   | -3494.3357  | 4220.7456 |
| 310.3560                | -56.1281    | -130.0966  | 656151.2420 | -21.7260  |
| -21.7332                |             |            |             |           |
| [15265]ENERGY: 16450000 | 3182.3947   | 5275.2843  | 5316.3735   |           |

## Supplementary Text 6

|                         |             |            |             |           |
|-------------------------|-------------|------------|-------------|-----------|
| 349.4985                | -15867.3132 | -1838.8438 | 0.0000      | 0.0000    |
| 7742.8386               | 4160.2326   | 309.7523   | -3582.6060  | 4220.9829 |
| 310.4045                | 33.2260     | -11.6762   | 656151.2420 | -22.3913  |
| -22.3885                |             |            |             |           |
| [15301]ENERGY: 16460000 | 3165.6392   | 5338.1482  | 5241.7842   |           |
| 346.1948                | -15907.9410 | -1748.7298 | 0.0000      | 0.0000    |
| 7724.8470               | 4159.9425   | 309.0325   | -3564.9045  | 4221.7217 |
| 310.5124                | -120.7276   | -69.5143   | 656151.2420 | -21.6841  |
| -21.6818                |             |            |             |           |
| [15351]ENERGY: 16470000 | 3205.4824   | 5218.4656  | 5270.9606   |           |
| 333.7013                | -15875.1377 | -1767.0338 | 0.0000      | 0.0000    |
| 7773.0013               | 4159.4397   | 310.9589   | -3613.5616  | 4221.5448 |
| 310.5307                | 63.5562     | 70.0857    | 656151.2420 | -17.8683  |
| -17.8673                |             |            |             |           |
| [15387]ENERGY: 16480000 | 3161.8495   | 5180.7294  | 5276.4459   |           |
| 342.8066                | -15850.8556 | -1768.6744 | 0.0000      | 0.0000    |
| 7814.0130               | 4156.3144   | 312.5996   | -3657.6986  | 4219.7931 |
| 310.6526                | 22.7162     | 16.5744    | 656151.2420 | -21.5031  |
| -21.5079                |             |            |             |           |
| [15437]ENERGY: 16490000 | 3205.5077   | 5234.4807  | 5319.2329   |           |
| 324.1975                | -15904.0299 | -1780.9495 | 0.0000      | 0.0000    |
| 7760.0495               | 4158.4890   | 310.4408   | -3601.5605  | 4221.8227 |
| 310.4764                | -94.6463    | -98.3990   | 656151.2420 | -19.6710  |
| -19.6863                |             |            |             |           |
| [15476]ENERGY: 16500000 | 3156.4028   | 5244.3332  | 5251.4683   |           |
| 335.2423                | -15875.4463 | -1760.8979 | 0.0000      | 0.0000    |
| 7806.6924               | 4157.7948   | 312.3067   | -3648.8976  | 4222.5003 |
| 310.4230                | 26.0006     | -60.4537   | 656151.2420 | -22.0500  |
| -22.0335                |             |            |             |           |
| [15526]ENERGY: 16510000 | 3196.9319   | 5244.8262  | 5264.7211   |           |
| 339.3514                | -15808.5376 | -1784.3930 | 0.0000      | 0.0000    |
| 7709.4446               | 4162.3446   | 308.4163   | -3547.1000  | 4222.2657 |
| 310.1587                | 100.2868    | 60.7226    | 656151.2420 | -26.5104  |
| -26.5039                |             |            |             |           |
| [15562]ENERGY: 16520000 | 3166.2292   | 5239.5608  | 5256.4132   |           |
| 361.5000                | -15877.3287 | -1743.8894 | 0.0000      | 0.0000    |
| 7754.6016               | 4157.0866   | 310.2228   | -3597.5150  | 4223.0617 |
| 310.3232                | 79.1045     | -18.3252   | 656151.2420 | -18.6089  |
| -18.6182                |             |            |             |           |
| [15612]ENERGY: 16530000 | 3157.0596   | 5201.2231  | 5203.5743   |           |
| 340.1068                | -15819.4603 | -1759.4766 | 0.0000      | 0.0000    |
| 7835.0816               | 4158.1084   | 313.4424   | -3676.9732  | 4221.9225 |
| 310.4275                | 53.1811     | 78.6475    | 656151.2420 | -20.6357  |
| -20.6233                |             |            |             |           |
| [15648]ENERGY: 16540000 | 3230.3587   | 5242.4181  | 5227.7577   |           |
| 347.0632                | -15881.1436 | -1757.9999 | 0.0000      | 0.0000    |
| 7752.6434               | 4161.0977   | 310.1445   | -3591.5457  | 4223.0691 |
| 310.4667                | -141.7580   | -141.4836  | 656151.2420 | -21.2323  |
| -21.2361                |             |            |             |           |
| [15698]ENERGY: 16550000 | 3171.1706   | 5195.9573  | 5242.1144   |           |
| 337.7137                | -15835.8216 | -1764.4039 | 0.0000      | 0.0000    |
| 7812.8940               | 4159.6245   | 312.5548   | -3653.2695  | 4223.1274 |
| 310.5661                | 8.3211      | -54.3861   | 656151.2420 | -17.9851  |
| -17.9817                |             |            |             |           |

## Supplementary Text 6

|                         |             |            |             |           |
|-------------------------|-------------|------------|-------------|-----------|
| [15734]ENERGY: 16560000 | 3271.5096   | 5247.2600  | 5273.3081   |           |
| 309.0882                | -15883.6418 | -1769.8079 | 0.0000      | 0.0000    |
| 7713.3500               | 4161.0663   | 308.5726   | -3552.2838  | 4223.4662 |
| 310.3705                | -91.4405    | -155.2148  | 656151.2420 | -19.1461  |
| -19.1482                |             |            |             |           |
| [15784]ENERGY: 16570000 | 3182.7791   | 5235.3346  | 5241.4971   |           |
| 346.4686                | -15803.5440 | -1753.2091 | 0.0000      | 0.0000    |
| 7713.0354               | 4162.3616   | 308.5600   | -3550.6738  | 4223.2019 |
| 310.4905                | -40.2789    | -24.0388   | 656151.2420 | -22.7821  |
| -22.7783                |             |            |             |           |
| [15820]ENERGY: 16580000 | 3302.0108   | 5194.3185  | 5241.6333   |           |
| 347.3326                | -15847.8198 | -1764.6435 | 0.0000      | 0.0000    |
| 7692.9548               | 4165.7867   | 307.7567   | -3527.1682  | 4224.8513 |
| 310.3865                | -10.6361    | -74.7410   | 656151.2420 | -23.4615  |
| -23.4715                |             |            |             |           |
| [15870]ENERGY: 16590000 | 3203.6770   | 5281.6999  | 5199.7279   |           |
| 341.3282                | -15846.6235 | -1800.6058 | 0.0000      | 0.0000    |
| 7780.1386               | 4159.3423   | 311.2444   | -3620.7963  | 4224.7241 |
| 310.4691                | 100.6743    | 45.4518    | 656151.2420 | -16.9302  |
| -16.9422                |             |            |             |           |
| [15909]ENERGY: 16600000 | 3220.6194   | 5208.0959  | 5281.4395   |           |
| 325.9022                | -15803.0312 | -1823.3924 | 0.0000      | 0.0000    |
| 7753.2110               | 4162.8446   | 310.1672   | -3590.3664  | 4224.7200 |
| 310.5114                | -113.5827   | -136.9375  | 656151.2420 | -19.1165  |
| -19.1248                |             |            |             |           |
| [15959]ENERGY: 16610000 | 3218.6578   | 5234.9730  | 5260.2229   |           |
| 347.4384                | -15790.4363 | -1779.6049 | 0.0000      | 0.0000    |
| 7671.4440               | 4162.6949   | 306.8961   | -3508.7492  | 4224.8817 |
| 310.4255                | -6.5950     | -60.4529   | 656151.2420 | -23.3976  |
| -23.3826                |             |            |             |           |
| [15995]ENERGY: 16620000 | 3294.6717   | 5159.4218  | 5247.2743   |           |
| 330.8627                | -15852.3905 | -1765.4309 | 0.0000      | 0.0000    |
| 7746.4392               | 4160.8484   | 309.8963   | -3585.5908  | 4225.0834 |
| 310.4349                | -150.8201   | -159.8927  | 656151.2420 | -18.3827  |
| -18.3805                |             |            |             |           |
| [16045]ENERGY: 16630000 | 3178.4923   | 5176.7842  | 5251.6283   |           |
| 353.7687                | -15863.1465 | -1771.4328 | 0.0000      | 0.0000    |
| 7835.2682               | 4161.3624   | 313.4499   | -3673.9058  | 4225.0698 |
| 310.5965                | 84.2736     | 15.0269    | 656151.2420 | -17.4056  |
| -17.3989                |             |            |             |           |
| [16081]ENERGY: 16640000 | 3239.3638   | 5193.5237  | 5274.3163   |           |
| 331.1894                | -15799.8422 | -1875.0209 | 0.0000      | 0.0000    |
| 7797.7223               | 4161.2525   | 311.9479   | -3636.4699  | 4224.8575 |
| 310.5857                | -99.7458    | -122.5602  | 656151.2420 | -16.2050  |
| -16.2115                |             |            |             |           |
| [16131]ENERGY: 16650000 | 3129.3938   | 5186.8104  | 5298.4764   |           |
| 364.1993                | -15910.9728 | -1734.0124 | 0.0000      | 0.0000    |
| 7825.1115               | 4159.0062   | 313.0436   | -3666.1054  | 4225.6124 |
| 310.5425                | 181.6130    | 146.2044   | 656151.2420 | -19.0656  |
| -19.0612                |             |            |             |           |
| [16167]ENERGY: 16660000 | 3242.1562   | 5215.8849  | 5308.0329   |           |
| 339.2489                | -15742.8805 | -1914.6001 | 0.0000      | 0.0000    |
| 7716.8044               | 4164.6468   | 308.7108   | -3552.1577  | 4226.6512 |
| 310.6137                | -85.8209    | -55.7851   | 656151.2420 | -16.4947  |

Supplementary Text 6

-16.5076  
 [16217]ENERGY: 16670000      3174.6290      5271.1529      5300.8562  
 338.5341      -15889.3865      -1763.9442      0.0000      0.0000  
 7728.7344      4160.5760      309.1880      -3568.1584      4224.6092  
 310.6743      -111.7052      -53.3012      656151.2420      -20.7589  
 -20.7408  
 [16253]ENERGY: 16680000      3229.4553      5173.4053      5237.4482  
 361.2525      -15860.4214      -1778.2260      0.0000      0.0000  
 7801.7603      4164.6743      312.1094      -3637.0860      4226.3048  
 310.5137      63.2601      -60.4873      656151.2420      -19.3939  
 -19.4002  
 [16303]ENERGY: 16690000      3209.2247      5255.1913      5273.8309  
 333.9383      -15896.4774      -1747.0510      0.0000      0.0000  
 7737.0825      4165.7394      309.5220      -3571.3431      4226.2576  
 310.5541      -18.6963      -23.0456      656151.2420      -17.9394  
 -17.9516  
 [16342]ENERGY: 16700000      3220.4428      5256.2049      5262.3605  
 317.9402      -15810.7641      -1811.8610      0.0000      0.0000  
 7731.7205      4166.0437      309.3075      -3565.6768      4225.9786  
 310.7592      -116.9409      -147.3085      656151.2420      -22.8071  
 -22.8015  
 [16392]ENERGY: 16710000      3220.2378      5324.8138      5273.6908  
 340.8417      -15945.9011      -1803.9701      0.0000      0.0000  
 7753.1634      4162.8763      310.1653      -3590.2871      4224.9129  
 310.7047      -271.2699      -211.6604      656151.2420      -16.2685  
 -16.2418  
 [16428]ENERGY: 16720000      3241.4230      5238.6574      5322.3456  
 327.2841      -15876.1982      -1772.2753      0.0000      0.0000  
 7682.2868      4163.5235      307.3299      -3518.7633      4225.7479  
 310.6269      -15.9709      -38.7828      656151.2420      -22.4568  
 -22.4728  
 [16478]ENERGY: 16730000      3161.6212      5204.9393      5310.9328  
 357.0058      -15803.2022      -1821.6595      0.0000      0.0000  
 7756.9118      4166.5492      310.3153      -3590.3626      4228.1503  
 310.5224      4.4132      -79.9542      656151.2420      -20.4444  
 -20.4623  
 [16514]ENERGY: 16740000      3229.2766      5283.6661      5264.5884  
 351.4881      -15908.0533      -1765.9955      0.0000      0.0000  
 7714.4665      4169.4370      308.6172      -3545.0295      4229.5697  
 310.5575      109.2111      51.3602      656151.2420      -19.4943  
 -19.4819  
 [16564]ENERGY: 16750000      3209.4189      5298.8648      5233.0340  
 352.8621      -15882.0334      -1786.1957      0.0000      0.0000  
 7739.3317      4165.2823      309.6120      -3574.0493      4227.8167  
 310.5852      95.1167      -26.2909      656151.2420      -18.5153  
 -18.5183  
 [16600]ENERGY: 16760000      3201.6175      5257.9799      5306.4531  
 341.6959      -15944.7433      -1777.7757      0.0000      0.0000  
 7779.5505      4164.7779      311.2209      -3614.7726      4227.9335  
 310.5473      18.7752      48.8662      656151.2420      -19.9032  
 -19.9129  
 [16650]ENERGY: 16770000      3175.7996      5180.5107      5332.4951  
 329.8109      -15917.8500      -1749.4609      0.0000      0.0000  
 7811.3632      4162.6687      312.4936      -3648.6945      4227.7606

## Supplementary Text 6

|                         |             |            |             |           |
|-------------------------|-------------|------------|-------------|-----------|
| 310.8260                | 169.1638    | 156.7680   | 656151.2420 | -18.3488  |
| -18.3407                |             |            |             |           |
| [16686]ENERGY: 16780000 | 3232.5844   | 5221.1536  | 5262.3397   |           |
| 360.8385                | -15909.8258 | -1739.7380 | 0.0000      | 0.0000    |
| 7739.5298               | 4166.8822   | 309.6199   | -3572.6476  | 4228.2338 |
| 310.9493                | 10.6872     | -67.1124   | 656151.2420 | -17.3682  |
| -17.3673                |             |            |             |           |
| [16736]ENERGY: 16790000 | 3208.5744   | 5211.1910  | 5258.0599   |           |
| 339.1337                | -15891.7951 | -1774.9915 | 0.0000      | 0.0000    |
| 7812.4531               | 4162.6254   | 312.5372   | -3649.8277  | 4227.9294 |
| 310.7859                | -44.1116    | -90.0074   | 656151.2420 | -22.8117  |
| -22.8208                |             |            |             |           |
| [16775]ENERGY: 16800000 | 3261.3311   | 5149.2541  | 5282.2388   |           |
| 368.9814                | -15903.1643 | -1795.1526 | 0.0000      | 0.0000    |
| 7800.9798               | 4164.4683   | 312.0782   | -3636.5115  | 4228.6278 |
| 310.7691                | -45.5493    | -84.5234   | 656151.2420 | -18.7740  |
| -18.7661                |             |            |             |           |
| [16825]ENERGY: 16810000 | 3255.2896   | 5154.7713  | 5263.0586   |           |
| 330.5245                | -15872.8989 | -1767.4866 | 0.0000      | 0.0000    |
| 7802.3903               | 4165.6489   | 312.1346   | -3636.7414  | 4228.2107 |
| 310.7692                | 83.8872     | -6.2723    | 656151.2420 | -17.4561  |
| -17.4567                |             |            |             |           |
| [16861]ENERGY: 16820000 | 3233.1804   | 5212.9792  | 5249.8806   |           |
| 318.4334                | -15803.8432 | -1827.8565 | 0.0000      | 0.0000    |
| 7784.6524               | 4167.4262   | 311.4250   | -3617.2261  | 4228.1592 |
| 310.5047                | -36.8846    | -52.7565   | 656151.2420 | -24.0562  |
| -24.0449                |             |            |             |           |
| [16911]ENERGY: 16830000 | 3249.1573   | 5208.7761  | 5262.0737   |           |
| 330.3507                | -15941.9101 | -1714.6831 | 0.0000      | 0.0000    |
| 7773.2783               | 4167.0427   | 310.9700   | -3606.2355  | 4228.5993 |
| 310.8415                | 52.5508     | 6.6877     | 656151.2420 | -16.7042  |
| -16.7054                |             |            |             |           |
| [16947]ENERGY: 16840000 | 3151.0709   | 5254.1797  | 5266.2714   |           |
| 335.5174                | -15762.8553 | -1864.3516 | 0.0000      | 0.0000    |
| 7784.2705               | 4164.1030   | 311.4097   | -3620.1675  | 4229.0505 |
| 310.7587                | 10.8060     | 30.7748    | 656151.2420 | -21.1857  |
| -21.1822                |             |            |             |           |
| [16997]ENERGY: 16850000 | 3203.8600   | 5162.3084  | 5279.8405   |           |
| 340.2596                | -15873.4043 | -1768.0009 | 0.0000      | 0.0000    |
| 7820.8684               | 4165.7318   | 312.8738   | -3655.1366  | 4228.6111 |
| 310.6377                | -196.0746   | -224.8897  | 656151.2420 | -20.3726  |
| -20.3866                |             |            |             |           |
| [17033]ENERGY: 16860000 | 3198.7843   | 5239.3127  | 5232.9571   |           |
| 325.8623                | -15864.1820 | -1816.7379 | 0.0000      | 0.0000    |
| 7844.8512               | 4160.8476   | 313.8333   | -3684.0036  | 4227.5337 |
| 310.5355                | -148.5257   | -114.0576  | 656151.2420 | -20.7407  |
| -20.7380                |             |            |             |           |
| [17083]ENERGY: 16870000 | 3222.0999   | 5400.0605  | 5251.3491   |           |
| 346.9871                | -15939.2006 | -1849.5755 | 0.0000      | 0.0000    |
| 7736.4573               | 4168.1777   | 309.4970   | -3568.2796  | 4229.5228 |
| 310.6453                | -52.9540    | -70.5804   | 656151.2420 | -19.7703  |
| -19.7691                |             |            |             |           |
| [17119]ENERGY: 16880000 | 3187.7201   | 5266.4743  | 5253.5221   |           |
| 331.1158                | -15830.7805 | -1833.3284 | 0.0000      | 0.0000    |

## Supplementary Text 6

|                         |             |            |             |           |
|-------------------------|-------------|------------|-------------|-----------|
| 7788.8706               | 4163.5940   | 311.5938   | -3625.2766  | 4229.4891 |
| 310.6950                | 150.5038    | 82.7154    | 656151.2420 | -17.9801  |
| -17.9801                |             |            |             |           |
| [17169]ENERGY: 16890000 | 3227.9365   | 5179.0915  | 5264.3387   |           |
| 363.0214                | -15894.9205 | -1727.5230 | 0.0000      | 0.0000    |
| 7752.8341               | 4164.7787   | 310.1521   | -3588.0554  | 4229.7479 |
| 310.6407                | 129.3704    | 76.1916    | 656151.2420 | -19.1679  |
| -19.1697                |             |            |             |           |
| [17208]ENERGY: 16900000 | 3194.0735   | 5244.1395  | 5209.5919   |           |
| 347.7232                | -15871.0938 | -1805.8767 | 0.0000      | 0.0000    |
| 7846.7051               | 4165.2627   | 313.9074   | -3681.4425  | 4228.6634 |
| 310.4226                | -256.1559   | -201.4197  | 656151.2420 | -23.0831  |
| -23.0671                |             |            |             |           |
| [17258]ENERGY: 16910000 | 3173.8895   | 5295.9522  | 5204.7084   |           |
| 330.5203                | -15903.6952 | -1767.3508 | 0.0000      | 0.0000    |
| 7829.0157               | 4163.0401   | 313.1998   | -3665.9757  | 4228.9130 |
| 310.6267                | -1.3286     | -79.2026   | 656151.2420 | -21.3730  |
| -21.3918                |             |            |             |           |
| [17294]ENERGY: 16920000 | 3171.1495   | 5346.7759  | 5299.6455   |           |
| 354.6964                | -15954.1822 | -1825.2007 | 0.0000      | 0.0000    |
| 7771.3842               | 4164.2687   | 310.8942   | -3607.1156  | 4229.8617 |
| 310.5489                | 84.3176     | -0.7975    | 656151.2420 | -19.1766  |
| -19.1551                |             |            |             |           |
| [17344]ENERGY: 16930000 | 3252.8902   | 5209.0904  | 5261.8251   |           |
| 335.7893                | -15844.7110 | -1699.1402 | 0.0000      | 0.0000    |
| 7656.2095               | 4171.9535   | 306.2867   | -3484.2560  | 4229.1474 |
| 310.7337                | 18.1980     | -21.9993   | 656151.2420 | -19.7816  |
| -19.8003                |             |            |             |           |
| [17380]ENERGY: 16940000 | 3242.3538   | 5221.0602  | 5292.6665   |           |
| 340.4705                | -15855.7659 | -1756.7689 | 0.0000      | 0.0000    |
| 7687.8621               | 4171.8781   | 307.5529   | -3515.9840  | 4229.0596 |
| 310.7720                | -93.5367    | -31.0334   | 656151.2420 | -15.3892  |
| -15.3805                |             |            |             |           |
| [17430]ENERGY: 16950000 | 3202.7278   | 5240.9907  | 5263.6468   |           |
| 337.6611                | -15832.1951 | -1822.5021 | 0.0000      | 0.0000    |
| 7774.9444               | 4165.2735   | 311.0366   | -3609.6709  | 4228.7221 |
| 310.7261                | -59.8712    | -95.9210   | 656151.2420 | -21.3532  |
| -21.3555                |             |            |             |           |
| [17466]ENERGY: 16960000 | 3227.3101   | 5220.1912  | 5358.2012   |           |
| 349.5731                | -15874.0223 | -1800.2546 | 0.0000      | 0.0000    |
| 7687.0514               | 4168.0502   | 307.5205   | -3519.0013  | 4230.1991 |
| 310.8848                | -77.8118    | -138.3258  | 656151.2420 | -15.8714  |
| -15.8907                |             |            |             |           |
| [17516]ENERGY: 16970000 | 3183.0416   | 5178.1422  | 5265.1612   |           |
| 349.9370                | -15911.3679 | -1731.1204 | 0.0000      | 0.0000    |
| 7832.2806               | 4166.0743   | 313.3304   | -3666.2063  | 4229.4578 |
| 310.8219                | 41.7633     | 32.8118    | 656151.2420 | -22.6048  |
| -22.5905                |             |            |             |           |
| [17552]ENERGY: 16980000 | 3181.0721   | 5314.7540  | 5341.8679   |           |
| 352.1698                | -15883.6848 | -1865.6677 | 0.0000      | 0.0000    |
| 7725.6661               | 4166.1775   | 309.0653   | -3559.4886  | 4230.8351 |
| 310.9704                | -97.7380    | -139.5612  | 656151.2420 | -21.2695  |
| -21.2973                |             |            |             |           |
| [17602]ENERGY: 16990000 | 3179.8175   | 5237.1839  | 5249.2372   |           |

## Supplementary Text 6

|                         |             |            |             |           |
|-------------------------|-------------|------------|-------------|-----------|
| 342.1354                | -15840.9887 | -1813.2716 | 0.0000      | 0.0000    |
| 7813.1528               | 4167.2664   | 312.5652   | -3645.8864  | 4229.8166 |
| 310.7742                | 251.2639    | 156.3589   | 656151.2420 | -20.2059  |
| -20.1675                |             |            |             |           |
| [17641]ENERGY: 17000000 | 3095.9415   | 5290.4952  | 5268.6509   |           |
| 329.9174                | -15877.0111 | -1781.2642 | 0.0000      | 0.0000    |
| 7836.1540               | 4162.8836   | 313.4853   | -3673.2704  | 4229.9426 |
| 310.6602                | 55.5550     | 67.8060    | 656151.2420 | -15.8921  |
| -15.8959                |             |            |             |           |
| [17691]ENERGY: 17010000 | 3221.8722   | 5199.4650  | 5279.4107   |           |
| 345.5701                | -15841.1509 | -1759.8570 | 0.0000      | 0.0000    |
| 7725.9049               | 4171.2149   | 309.0748   | -3554.6900  | 4230.2736 |
| 310.6252                | 16.1869     | 31.2089    | 656151.2420 | -18.7989  |
| -18.7979                |             |            |             |           |
| [17727]ENERGY: 17020000 | 3262.0532   | 5283.3560  | 5259.5525   |           |
| 350.4422                | -15907.6368 | -1757.3283 | 0.0000      | 0.0000    |
| 7677.8700               | 4168.3089   | 307.1532   | -3509.5611  | 4231.6207 |
| 310.6304                | 111.6998    | 80.5177    | 656151.2420 | -16.4554  |
| -16.4726                |             |            |             |           |
| [17777]ENERGY: 17030000 | 3244.9678   | 5303.1950  | 5251.5225   |           |
| 334.3406                | -15933.1582 | -1775.8103 | 0.0000      | 0.0000    |
| 7747.3276               | 4172.3850   | 309.9318   | -3574.9426  | 4232.1741 |
| 310.8560                | 30.4758     | -31.2448   | 656151.2420 | -21.8067  |
| -21.8037                |             |            |             |           |
| [17813]ENERGY: 17040000 | 3172.3020   | 5282.4510  | 5269.8668   |           |
| 335.2552                | -15948.1550 | -1727.2651 | 0.0000      | 0.0000    |
| 7782.2769               | 4166.7318   | 311.3300   | -3615.5450  | 4231.2368 |
| 310.8821                | 30.9302     | -26.2343   | 656151.2420 | -23.3558  |
| -23.3576                |             |            |             |           |
| [17863]ENERGY: 17050000 | 3145.2985   | 5338.0207  | 5308.1590   |           |
| 339.7222                | -15944.8048 | -1790.8635 | 0.0000      | 0.0000    |
| 7769.9903               | 4165.5225   | 310.8385   | -3604.4678  | 4230.4931 |
| 310.9621                | 23.9650     | 36.4140    | 656151.2420 | -21.2036  |
| -21.1976                |             |            |             |           |
| [17899]ENERGY: 17060000 | 3181.9734   | 5229.3276  | 5226.6991   |           |
| 322.8734                | -15900.3571 | -1677.3432 | 0.0000      | 0.0000    |
| 7780.6575               | 4163.8307   | 311.2652   | -3616.8268  | 4231.1473 |
| 310.8260                | 44.2892     | -19.7065   | 656151.2420 | -21.4019  |
| -21.3969                |             |            |             |           |
| [17949]ENERGY: 17070000 | 3212.3844   | 5179.2065  | 5250.0445   |           |
| 358.0362                | -15813.5249 | -1832.3130 | 0.0000      | 0.0000    |
| 7812.6394               | 4166.4732   | 312.5446   | -3646.1662  | 4230.7902 |
| 310.8718                | -145.5825   | -139.9315  | 656151.2420 | -18.0342  |
| -18.0264                |             |            |             |           |
| [17985]ENERGY: 17080000 | 3263.3402   | 5234.1589  | 5241.7074   |           |
| 322.1241                | -15821.7056 | -1786.7444 | 0.0000      | 0.0000    |
| 7718.0976               | 4170.9781   | 308.7625   | -3547.1194  | 4230.9544 |
| 310.9060                | -40.7942    | -3.9509    | 656151.2420 | -21.5872  |
| -21.5959                |             |            |             |           |
| [18035]ENERGY: 17090000 | 3271.2357   | 5237.6639  | 5289.7829   |           |
| 343.1240                | -15951.8842 | -1799.3133 | 0.0000      | 0.0000    |
| 7778.1906               | 4168.7996   | 311.1665   | -3609.3911  | 4231.0676 |
| 310.9715                | -218.3630   | -153.1789  | 656151.2420 | -22.5557  |
| -22.5647                |             |            |             |           |

## Supplementary Text 6

|                         |             |            |             |
|-------------------------|-------------|------------|-------------|
| [18074]ENERGY: 17100000 | 3231.2345   | 5210.4221  | 5238.2410   |
| 337.2585                | -15843.2132 | -1775.3438 | 0.0000      |
| 7769.9044               | 4168.5036   | 310.8350   | -3601.4008  |
| 310.9309                | -71.2448    | -93.6807   | 656151.2420 |
| -20.8967                |             |            | -20.9034    |
| [18124]ENERGY: 17110000 | 3105.0548   | 5226.7797  | 5287.9854   |
| 343.0885                | -15826.7228 | -1786.4951 | 0.0000      |
| 7816.7990               | 4166.4895   | 312.7110   | -3650.3095  |
| 310.9366                | 70.9439     | 64.5003    | 656151.2420 |
| -22.1586                |             |            | -22.1733    |
| [18160]ENERGY: 17120000 | 3206.8884   | 5155.5963  | 5265.4818   |
| 359.3482                | -15778.0905 | -1773.2578 | 0.0000      |
| 7732.7996               | 4168.7660   | 309.3506   | -3564.0336  |
| 310.8877                | -12.5325    | -80.6687   | 656151.2420 |
| -20.1864                |             |            | -20.1728    |
| [18210]ENERGY: 17130000 | 3178.3118   | 5215.0708  | 5216.9504   |
| 320.8887                | -15893.5487 | -1741.9050 | 0.0000      |
| 7873.0705               | 4168.8384   | 314.9622   | -3704.2321  |
| 310.8497                | 77.8992     | 75.3055    | 656151.2420 |
| -15.9217                |             |            | -15.9404    |
| [18246]ENERGY: 17140000 | 3179.0089   | 5259.6061  | 5270.2478   |
| 334.2099                | -15830.4586 | -1845.3335 | 0.0000      |
| 7800.8117               | 4168.0922   | 312.0715   | -3632.7195  |
| 310.9568                | 11.3903     | -49.4962   | 656151.2420 |
| -20.3204                |             |            | -20.3071    |
| [18296]ENERGY: 17150000 | 3205.0325   | 5226.6838  | 5212.8303   |
| 332.2264                | -15946.0651 | -1693.0463 | 0.0000      |
| 7830.9935               | 4168.6551   | 313.2789   | -3662.3384  |
| 310.8995                | 41.9867     | 4.5973     | 656151.2420 |
| -19.0326                |             |            | -19.0378    |
| [18332]ENERGY: 17160000 | 3132.0849   | 5230.0000  | 5250.6812   |
| 356.7755                | -15817.1134 | -1732.1721 | 0.0000      |
| 7752.6632               | 4172.9192   | 310.1453   | -3579.7439  |
| 310.7580                | 144.0405    | 133.5636   | 656151.2420 |
| -16.7374                |             |            | -16.7316    |
| [18382]ENERGY: 17170000 | 3247.8879   | 5196.8168  | 5238.6703   |
| 348.0193                | -15819.6869 | -1775.7656 | 0.0000      |
| 7737.1497               | 4173.0915   | 309.5247   | -3564.0581  |
| 310.8174                | -115.2113   | -51.2108   | 656151.2420 |
| -19.6131                |             |            | -19.6220    |
| [18418]ENERGY: 17180000 | 3156.1170   | 5293.4920  | 5233.7746   |
| 368.5522                | -15811.8194 | -1829.2250 | 0.0000      |
| 7759.9181               | 4170.8095   | 310.4355   | -3589.1085  |
| 310.8179                | -1.1756     | 12.5909    | 656151.2420 |
| -16.7295                |             |            | -16.7137    |
| [18468]ENERGY: 17190000 | 3231.4362   | 5287.3528  | 5264.6552   |
| 346.8367                | -15889.3393 | -1778.1311 | 0.0000      |
| 7712.7763               | 4175.5868   | 308.5496   | -3537.1895  |
| 310.8559                | -45.4597    | -138.9153  | 656151.2420 |
| -19.1433                |             |            | -19.1535    |
| [18507]ENERGY: 17200000 | 3202.2079   | 5257.0025  | 5272.1459   |
| 354.1787                | -15917.3220 | -1791.1879 | 0.0000      |
| 7796.6023               | 4173.6274   | 311.9031   | -3622.9749  |
| 310.9220                | -20.7260    | 64.0811    | 656151.2420 |
|                         |             |            | -22.2571    |



Supplementary Text 6

-22.2672  
 [18557]ENERGY: 17210000      3106.3191      5284.7818      5291.8837  
 323.7770      -15914.1831      -1738.0796      0.0000      0.0000  
 7816.1534      4170.6522      312.6852      -3645.5012      4235.9695  
 310.9152      125.0638      31.0243      656151.2420      -19.4642  
 -19.4569  
 [18593]ENERGY: 17220000      3244.8441      5198.6377      5296.4516  
 325.3573      -15910.1653      -1741.2985      0.0000      0.0000  
 7759.8922      4173.7191      310.4345      -3586.1731      4235.3819  
 310.8679      28.0124      -8.4349      656151.2420      -21.4151  
 -21.4313  
 [18643]ENERGY: 17230000      3231.0314      5249.0846      5244.1776  
 324.7268      -15946.9056      -1745.7194      0.0000      0.0000  
 7812.9119      4169.3074      312.5555      -3643.6046      4235.7893  
 310.8981      -58.9549      -84.2018      656151.2420      -19.7711  
 -19.7536  
 [18679]ENERGY: 17240000      3166.7783      5195.2036      5286.9177  
 365.2139      -15871.3974      -1813.0971      0.0000      0.0000  
 7843.9327      4173.5516      313.7965      -3670.3811      4236.4923  
 310.6488      -32.2767      -99.6479      656151.2420      -21.7603  
 -21.7510  
 [18729]ENERGY: 17250000      3184.5475      5192.2330      5291.2341  
 374.7619      -15860.9538      -1796.1551      0.0000      0.0000  
 7786.8126      4172.4802      311.5114      -3614.3324      4237.6306  
 310.6462      69.7607      29.8535      656151.2420      -18.8461  
 -18.8762  
 [18765]ENERGY: 17260000      3243.9949      5169.5400      5300.4228  
 361.2844      -15826.4430      -1808.4956      0.0000      0.0000  
 7738.4211      4178.7245      309.5755      -3559.6966      4237.1473  
 310.4866      12.3922      24.0185      656151.2420      -23.7361  
 -23.7190  
 [18815]ENERGY: 17270000      3186.0145      5336.9087      5304.5895  
 346.4051      -15983.9294      -1831.0881      0.0000      0.0000  
 7813.7154      4172.6158      312.5877      -3641.0996      4237.9715  
 310.5156      -6.5507      -46.7421      656151.2420      -23.3897  
 -23.3987  
 [18851]ENERGY: 17280000      3265.8072      5233.6773      5219.9537  
 294.7215      -15799.7140      -1838.5503      0.0000      0.0000  
 7797.7382      4173.6335      311.9485      -3624.1046      4237.0917  
 310.7208      -61.7006      -78.8111      656151.2420      -17.6252  
 -17.6240  
 [18901]ENERGY: 17290000      3143.8329      5275.0335      5277.8132  
 348.9199      -15880.0202      -1800.4061      0.0000      0.0000  
 7809.8902      4175.0634      312.4347      -3634.8268      4238.6010  
 310.5577      5.4595      -52.4708      656151.2420      -22.5170  
 -22.5094  
 [18940]ENERGY: 17300000      3263.2125      5263.7773      5257.8037  
 343.8094      -15886.6551      -1847.8012      0.0000      0.0000  
 7782.3025      4176.4491      311.3310      -3605.8534      4237.3749  
 310.7148      -18.3098      -99.4647      656151.2420      -28.3639  
 -28.3617  
 [18990]ENERGY: 17310000      3287.0413      5281.5059      5240.4350  
 347.3655      -15870.4864      -1839.3500      0.0000      0.0000  
 7728.0143      4174.5256      309.1592      -3553.4887      4238.6139

## Supplementary Text 6

|                         |             |            |             |           |
|-------------------------|-------------|------------|-------------|-----------|
| 310.6164                | -127.5799   | -150.6237  | 656151.2420 | -21.5228  |
| -21.5356                |             |            |             |           |
| [19026]ENERGY: 17320000 | 3244.6999   | 5284.0735  | 5293.4103   |           |
| 332.4988                | -15908.3470 | -1782.1063 | 0.0000      | 0.0000    |
| 7713.4994               | 4177.7286   | 308.5785   | -3535.7708  | 4238.1875 |
| 310.7477                | -164.6814   | -54.4673   | 656151.2420 | -23.5101  |
| -23.5024                |             |            |             |           |
| [19076]ENERGY: 17330000 | 3213.6993   | 5222.2343  | 5270.1949   |           |
| 333.2119                | -15905.4714 | -1779.8222 | 0.0000      | 0.0000    |
| 7819.7849               | 4173.8316   | 312.8305   | -3645.9533  | 4238.6268 |
| 310.7092                | -86.7719    | -81.9043   | 656151.2420 | -24.3320  |
| -24.3269                |             |            |             |           |
| [19112]ENERGY: 17340000 | 3258.5943   | 5274.2887  | 5290.8736   |           |
| 339.6854                | -15884.7067 | -1831.3421 | 0.0000      | 0.0000    |
| 7731.1144               | 4178.5077   | 309.2832   | -3552.6068  | 4239.0459 |
| 310.5053                | -45.8642    | -80.0634   | 656151.2420 | -23.2161  |
| -23.2253                |             |            |             |           |
| [19162]ENERGY: 17350000 | 3248.5406   | 5227.6367  | 5305.3187   |           |
| 344.3522                | -15989.1768 | -1730.0106 | 0.0000      | 0.0000    |
| 7768.2689               | 4174.9297   | 310.7696   | -3593.3392  | 4239.6308 |
| 310.6559                | -16.9291    | -23.7952   | 656151.2420 | -25.0886  |
| -25.0657                |             |            |             |           |
| [19198]ENERGY: 17360000 | 3207.2914   | 5416.4688  | 5248.0268   |           |
| 349.7514                | -15811.9966 | -1853.3385 | 0.0000      | 0.0000    |
| 7623.8486               | 4180.0519   | 304.9921   | -3443.7968  | 4240.1990 |
| 310.6255                | 65.0302     | 80.2974    | 656151.2420 | -20.8649  |
| -20.8685                |             |            |             |           |
| [19248]ENERGY: 17370000 | 3211.9992   | 5241.2689  | 5251.1755   |           |
| 343.5690                | -15831.3321 | -1863.3509 | 0.0000      | 0.0000    |
| 7819.9644               | 4173.2940   | 312.8377   | -3646.6704  | 4239.1335 |
| 310.6104                | -130.8900   | -107.6209  | 656151.2420 | -22.2620  |
| -22.2658                |             |            |             |           |
| [19284]ENERGY: 17380000 | 3189.0539   | 5262.9685  | 5268.1777   |           |
| 339.3454                | -15882.7828 | -1803.3171 | 0.0000      | 0.0000    |
| 7803.3836               | 4176.8291   | 312.1744   | -3626.5545  | 4239.3781 |
| 310.6482                | -16.3247    | -77.4114   | 656151.2420 | -22.9850  |
| -22.9933                |             |            |             |           |
| [19334]ENERGY: 17390000 | 3277.4484   | 5235.5139  | 5288.3052   |           |
| 336.0903                | -15857.9317 | -1816.3974 | 0.0000      | 0.0000    |
| 7716.5165               | 4179.5452   | 308.6992   | -3536.9713  | 4240.2273 |
| 310.6354                | -12.1783    | -17.3829   | 656151.2420 | -23.3532  |
| -23.3476                |             |            |             |           |
| [19373]ENERGY: 17400000 | 3193.3221   | 5289.6962  | 5261.0743   |           |
| 314.3594                | -15863.5435 | -1762.4941 | 0.0000      | 0.0000    |
| 7746.0539               | 4178.4682   | 309.8809   | -3567.5857  | 4239.4413 |
| 310.6794                | -40.6807    | -48.4083   | 656151.2420 | -23.8032  |
| -23.8035                |             |            |             |           |
| [19423]ENERGY: 17410000 | 3182.2423   | 5145.6360  | 5304.4207   |           |
| 353.7011                | -15873.1648 | -1720.3084 | 0.0000      | 0.0000    |
| 7783.7155               | 4176.2425   | 311.3875   | -3607.4730  | 4239.5919 |
| 310.5028                | 36.3508     | -30.9825   | 656151.2420 | -23.6208  |
| -23.6355                |             |            |             |           |
| [19459]ENERGY: 17420000 | 3179.4746   | 5272.9171  | 5244.4930   |           |
| 353.1825                | -15797.1572 | -1836.3058 | 0.0000      | 0.0000    |

## Supplementary Text 6

|                         |             |            |             |           |
|-------------------------|-------------|------------|-------------|-----------|
| 7765.0349               | 4181.6391   | 310.6402   | -3583.3958  | 4240.8557 |
| 310.6268                | -9.9350     | -4.8778    | 656151.2420 | -19.7621  |
| -19.7476                |             |            |             |           |
| [19509]ENERGY: 17430000 | 3232.4295   | 5277.3642  | 5253.8269   |           |
| 359.7248                | -15925.2672 | -1772.8068 | 0.0000      | 0.0000    |
| 7749.3942               | 4174.6655   | 310.0145   | -3574.7287  | 4240.4866 |
| 310.8319                | 45.7423     | 52.7940    | 656151.2420 | -20.8540  |
| -20.8541                |             |            |             |           |
| [19545]ENERGY: 17440000 | 3189.5779   | 5292.7635  | 5273.3497   |           |
| 342.7111                | -15869.1471 | -1800.5753 | 0.0000      | 0.0000    |
| 7747.6836               | 4176.3635   | 309.9461   | -3571.3201  | 4240.3037 |
| 310.8651                | -8.4390     | -43.6005   | 656151.2420 | -22.4987  |
| -22.4925                |             |            |             |           |
| [19595]ENERGY: 17450000 | 3182.4858   | 5295.6752  | 5264.8427   |           |
| 346.6083                | -15859.4168 | -1825.3184 | 0.0000      | 0.0000    |
| 7772.4000               | 4177.2769   | 310.9349   | -3595.1231  | 4241.0893 |
| 310.7136                | 88.4840     | 78.1827    | 656151.2420 | -22.0097  |
| -22.0233                |             |            |             |           |
| [19631]ENERGY: 17460000 | 3175.6760   | 5272.9622  | 5290.3718   |           |
| 351.1267                | -15855.6895 | -1747.1809 | 0.0000      | 0.0000    |
| 7693.1901               | 4180.4564   | 307.7661   | -3512.7337  | 4239.1371 |
| 310.6022                | 10.3614     | -34.1788   | 656151.2420 | -20.9775  |
| -20.9973                |             |            |             |           |
| [19681]ENERGY: 17470000 | 3258.1608   | 5194.8341  | 5278.7259   |           |
| 322.9558                | -15855.8861 | -1843.3881 | 0.0000      | 0.0000    |
| 7819.6216               | 4175.0240   | 312.8240   | -3644.5976  | 4239.9668 |
| 310.6022                | -100.9758   | -178.6599  | 656151.2420 | -22.4071  |
| -22.3807                |             |            |             |           |
| [19717]ENERGY: 17480000 | 3192.4623   | 5245.0331  | 5261.4401   |           |
| 317.4537                | -15861.7508 | -1784.1414 | 0.0000      | 0.0000    |
| 7809.5615               | 4180.0586   | 312.4215   | -3629.5029  | 4241.2205 |
| 310.6551                | -78.0648    | -96.7393   | 656151.2420 | -21.5749  |
| -21.5724                |             |            |             |           |
| [19767]ENERGY: 17490000 | 3332.7069   | 5239.6071  | 5292.3933   |           |
| 330.1781                | -15866.5562 | -1734.4066 | 0.0000      | 0.0000    |
| 7589.1554               | 4183.0781   | 303.6042   | -3406.0773  | 4240.5063 |
| 310.7880                | -32.1864    | -13.6090   | 656151.2420 | -19.3028  |
| -19.3008                |             |            |             |           |
| [19806]ENERGY: 17500000 | 3209.7798   | 5223.8686  | 5283.6218   |           |
| 333.1606                | -15914.8203 | -1725.6379 | 0.0000      | 0.0000    |
| 7767.8780               | 4177.8507   | 310.7540   | -3590.0273  | 4240.2013 |
| 310.7796                | -55.1818    | -39.3264   | 656151.2420 | -16.5093  |
| -16.5250                |             |            |             |           |
| [19856]ENERGY: 17510000 | 3229.1297   | 5296.2333  | 5294.4794   |           |
| 327.4190                | -15916.1602 | -1770.1247 | 0.0000      | 0.0000    |
| 7718.1710               | 4179.1475   | 308.7654   | -3539.0235  | 4240.9638 |
| 310.8131                | 41.3898     | -12.1665   | 656151.2420 | -18.8128  |
| -18.8197                |             |            |             |           |
| [19892]ENERGY: 17520000 | 3208.6984   | 5198.1097  | 5271.1958   |           |
| 356.8377                | -15900.3240 | -1748.1760 | 0.0000      | 0.0000    |
| 7794.0849               | 4180.4266   | 311.8024   | -3613.6583  | 4240.5445 |
| 310.7545                | 8.1154      | 5.0016     | 656151.2420 | -16.9184  |
| -16.9123                |             |            |             |           |
| [19942]ENERGY: 17530000 | 3237.1440   | 5299.7491  | 5224.8586   |           |

## Supplementary Text 6

|                         |             |            |             |           |
|-------------------------|-------------|------------|-------------|-----------|
| 323.8275                | -15758.6876 | -1839.6886 | 0.0000      | 0.0000    |
| 7696.6999               | 4183.9029   | 307.9065   | -3512.7970  | 4241.5701 |
| 310.8727                | -10.3150    | -46.1307   | 656151.2420 | -14.9824  |
| -14.9765                |             |            |             |           |
| [19978]ENERGY: 17540000 | 3264.4020   | 5276.7898  | 5285.5543   |           |
| 334.7238                | -15902.7113 | -1772.3301 | 0.0000      | 0.0000    |
| 7692.4794               | 4178.9079   | 307.7376   | -3513.5715  | 4241.9751 |
| 310.8136                | -59.6382    | -49.2045   | 656151.2420 | -18.7248  |
| -18.7147                |             |            |             |           |
| [20028]ENERGY: 17550000 | 3241.7200   | 5282.2564  | 5275.6828   |           |
| 324.3763                | -15847.7094 | -1848.5410 | 0.0000      | 0.0000    |
| 7751.0470               | 4178.8320   | 310.0806   | -3572.2150  | 4243.0984 |
| 310.8499                | -81.6332    | -53.7820   | 656151.2420 | -15.9696  |
| -15.9675                |             |            |             |           |
| [20064]ENERGY: 17560000 | 3178.5913   | 5214.1162  | 5326.9956   |           |
| 338.0349                | -15934.7531 | -1733.5624 | 0.0000      | 0.0000    |
| 7789.6104               | 4179.0329   | 311.6234   | -3610.5776  | 4240.5459 |
| 310.7514                | -105.7306   | -41.1581   | 656151.2420 | -15.5109  |
| -15.5271                |             |            |             |           |
| [20114]ENERGY: 17570000 | 3187.4284   | 5204.2310  | 5278.0065   |           |
| 358.3039                | -15840.6989 | -1770.3849 | 0.0000      | 0.0000    |
| 7760.7839               | 4177.6699   | 310.4702   | -3583.1140  | 4241.4158 |
| 310.7713                | 108.1882    | 69.0206    | 656151.2420 | -19.4872  |
| -19.4817                |             |            |             |           |
| [20150]ENERGY: 17580000 | 3222.6410   | 5236.7892  | 5244.2887   |           |
| 323.6745                | -15883.1057 | -1700.4483 | 0.0000      | 0.0000    |
| 7734.9906               | 4178.8300   | 309.4383   | -3556.1606  | 4240.4913 |
| 310.8969                | -100.8253   | 1.3634     | 656151.2420 | -14.6346  |
| -14.6294                |             |            |             |           |
| [20200]ENERGY: 17590000 | 3145.7480   | 5140.7910  | 5299.2596   |           |
| 315.1333                | -15832.9949 | -1759.8582 | 0.0000      | 0.0000    |
| 7870.7365               | 4178.8153   | 314.8688   | -3691.9212  | 4241.0032 |
| 310.7651                | 88.7871     | 52.8540    | 656151.2420 | -18.8127  |
| -18.8218                |             |            |             |           |
| [20239]ENERGY: 17600000 | 3193.4759   | 5197.3762  | 5245.4044   |           |
| 330.3635                | -15869.8103 | -1760.1552 | 0.0000      | 0.0000    |
| 7841.5873               | 4178.2419   | 313.7027   | -3663.3455  | 4240.5537 |
| 310.7927                | 115.4427    | 81.6051    | 656151.2420 | -19.9729  |
| -19.9542                |             |            |             |           |
| [20289]ENERGY: 17610000 | 3263.4850   | 5161.1565  | 5272.5320   |           |
| 357.3027                | -15854.6489 | -1763.7975 | 0.0000      | 0.0000    |
| 7745.4927               | 4181.5224   | 309.8584   | -3563.9703  | 4243.0951 |
| 310.9745                | -132.0007   | -126.8661  | 656151.2420 | -16.6762  |
| -16.6896                |             |            |             |           |
| [20325]ENERGY: 17620000 | 3242.5186   | 5201.7958  | 5278.9699   |           |
| 343.6016                | -15924.2122 | -1776.2783 | 0.0000      | 0.0000    |
| 7808.8545               | 4175.2499   | 312.3932   | -3633.6045  | 4241.1779 |
| 311.0248                | -55.0942    | 28.0064    | 656151.2420 | -19.6899  |
| -19.6898                |             |            |             |           |
| [20375]ENERGY: 17630000 | 3233.6344   | 5241.9683  | 5232.4803   |           |
| 333.9554                | -15878.5659 | -1766.1134 | 0.0000      | 0.0000    |
| 7783.0395               | 4180.3985   | 311.3605   | -3602.6410  | 4242.1610 |
| 310.9802                | 65.9076     | 23.2590    | 656151.2420 | -17.5698  |
| -17.5759                |             |            |             |           |

## Supplementary Text 6

|                         |             |            |             |
|-------------------------|-------------|------------|-------------|
| [20411]ENERGY: 17640000 | 3231.6795   | 5192.0811  | 5272.1437   |
| 341.8461                | -15823.8492 | -1775.7024 | 0.0000      |
| 7741.9085               | 4180.1074   | 309.7150   | -3561.8012  |
| 310.7992                | 15.4223     | -9.5329    | 656151.2420 |
| -19.9445                |             |            | -19.9560    |
| [20461]ENERGY: 17650000 | 3210.8851   | 5301.2722  | 5256.7221   |
| 334.2693                | -15815.6549 | -1841.6553 | 0.0000      |
| 7737.0037               | 4182.8421   | 309.5188   | -3554.1616  |
| 310.9801                | -17.1727    | -33.9625   | 656151.2420 |
| -18.3556                |             |            | -18.3417    |
| [20497]ENERGY: 17660000 | 3192.7784   | 5213.4501  | 5285.0636   |
| 329.6647                | -15877.4924 | -1796.5756 | 0.0000      |
| 7831.8434               | 4178.7321   | 313.3129   | -3653.1113  |
| 310.9011                | -48.1232    | -18.5134   | 656151.2420 |
| -17.5209                |             |            | -17.5403    |
| [20547]ENERGY: 17670000 | 3191.5031   | 5236.5144  | 5277.1338   |
| 344.7781                | -15940.8126 | -1655.9447 | 0.0000      |
| 7726.4217               | 4179.5938   | 309.0955   | -3546.8279  |
| 310.9374                | 287.1680    | 196.8269   | 656151.2420 |
| -20.0859                |             |            | -20.0695    |
| [20583]ENERGY: 17680000 | 3201.2359   | 5270.6076  | 5197.3002   |
| 323.2811                | -15843.2325 | -1831.8402 | 0.0000      |
| 7865.8919               | 4183.2441   | 314.6750   | -3682.6478  |
| 310.9719                | -136.7449   | -201.7181  | 656151.2420 |
| -18.3060                |             |            | -18.3011    |
| [20633]ENERGY: 17690000 | 3225.6185   | 5263.8303  | 5311.9353   |
| 326.3551                | -15795.4615 | -1857.5157 | 0.0000      |
| 7706.4284               | 4181.1904   | 308.2957   | -3525.2381  |
| 310.9876                | -59.1302    | -46.6961   | 656151.2420 |
| -18.5782                |             |            | -18.5968    |
| [20672]ENERGY: 17700000 | 3195.8320   | 5245.6866  | 5300.1834   |
| 336.6968                | -15885.1554 | -1748.5406 | 0.0000      |
| 7739.1252               | 4183.8279   | 309.6037   | -3555.2973  |
| 310.9139                | -14.6870    | 68.0764    | 656151.2420 |
| -24.2378                |             |            | -24.2300    |
| [20722]ENERGY: 17710000 | 3138.2127   | 5200.3225  | 5294.1102   |
| 324.3665                | -15900.0838 | -1732.7346 | 0.0000      |
| 7850.5973               | 4174.7907   | 314.0631   | -3675.8066  |
| 311.1291                | 124.6545    | 46.8002    | 656151.2420 |
| -22.6106                |             |            | -22.6286    |
| [20758]ENERGY: 17720000 | 3223.4844   | 5177.0092  | 5288.3031   |
| 330.9362                | -15829.9934 | -1765.1980 | 0.0000      |
| 7756.2811               | 4180.8227   | 310.2900   | -3575.4584  |
| 311.0985                | 29.1774     | -50.8067   | 656151.2420 |
| -19.2114                |             |            | -19.1896    |
| [20808]ENERGY: 17730000 | 3192.6910   | 5194.7496  | 5270.0095   |
| 350.9720                | -15799.7355 | -1814.0573 | 0.0000      |
| 7783.0987               | 4177.7281   | 311.3629   | -3605.3706  |
| 310.9496                | -80.3490    | -110.2865  | 656151.2420 |
| -21.8179                |             |            | -21.8077    |
| [20844]ENERGY: 17740000 | 3154.0204   | 5275.7171  | 5257.8003   |
| 339.9182                | -15826.0730 | -1740.7996 | 0.0000      |
| 7721.7975               | 4182.3810   | 308.9105   | -3539.4165  |
| 310.8505                | 115.3638    | 81.9444    | 656151.2420 |
|                         |             |            | -17.7341    |

Supplementary Text 6

-17.7275  
 [20894]ENERGY: 17750000      3158.1787      5236.9970      5259.8954  
 329.1596      -15857.8410      -1751.2917      0.0000      0.0000  
 7801.2024      4176.3005      312.0871      -3624.9019      4242.9992  
 310.8319      145.7346      109.8133      656151.2420      -21.0923  
 -21.0792  
 [20930]ENERGY: 17760000      3182.4929      5248.9786      5240.3909  
 349.7062      -15890.5214      -1781.1114      0.0000      0.0000  
 7827.8858      4177.8216      313.1546      -3650.0642      4242.7682  
 310.8831      36.8405      55.2305      656151.2420      -19.2314  
 -19.2217  
 [20980]ENERGY: 17770000      3287.9294      5214.1578      5239.0212  
 344.0138      -15795.2037      -1833.4166      0.0000      0.0000  
 7723.2808      4179.7827      308.9698      -3543.4981      4243.8352  
 311.2330      -290.4132      -232.9177      656151.2420      -21.6296  
 -21.6484  
 [21016]ENERGY: 17780000      3227.4899      5306.1321      5249.0980  
 376.7406      -15867.7457      -1756.1212      0.0000      0.0000  
 7650.7431      4186.3367      306.0680      -3464.4064      4245.4077  
 311.1393      74.8768      -6.3483      656151.2420      -20.8719  
 -20.8615  
 [21066]ENERGY: 17790000      3165.6908      5251.9628      5220.4244  
 310.9629      -15850.6254      -1724.8452      0.0000      0.0000  
 7808.8831      4182.4534      312.3944      -3626.4297      4244.6571  
 311.1439      163.1393      85.2768      656151.2420      -19.8031  
 -19.8135  
 [21105]ENERGY: 17800000      3169.2823      5290.0427      5279.2421  
 332.8645      -15880.6140      -1759.8954      0.0000      0.0000  
 7754.7315      4185.6538      310.2280      -3569.0777      4245.5752  
 311.0244      245.3996      81.3957      656151.2420      -22.2307  
 -22.2470  
 [21155]ENERGY: 17810000      3217.6255      5267.1320      5230.6300  
 328.9286      -15850.3303      -1788.1579      0.0000      0.0000  
 7774.3894      4180.2173      311.0144      -3594.1721      4244.8300  
 310.9769      -27.0907      -103.6082      656151.2420      -20.8824  
 -20.8616  
 [21191]ENERGY: 17820000      3108.4892      5256.1989      5205.6862  
 317.2654      -15821.8039      -1763.2464      0.0000      0.0000  
 7878.4283      4181.0177      315.1765      -3697.4106      4246.3404  
 311.0305      91.3505      22.1578      656151.2420      -18.7466  
 -18.7454  
 [21241]ENERGY: 17830000      3187.7513      5256.5203      5278.0514  
 330.9397      -15897.8682      -1665.7975      0.0000      0.0000  
 7697.7637      4187.3608      307.9490      -3510.4030      4246.1467  
 311.0736      184.2457      84.6970      656151.2420      -21.2060  
 -21.2134  
 [21277]ENERGY: 17840000      3283.0552      5141.6295      5260.6993  
 342.9047      -15917.8439      -1712.8169      0.0000      0.0000  
 7788.2963      4185.9242      311.5708      -3602.3721      4246.5461  
 311.2035      -54.2085      -107.5457      656151.2420      -17.0356  
 -17.0361  
 [21327]ENERGY: 17850000      3136.9381      5287.5112      5238.1241  
 371.5034      -15806.7945      -1806.3390      0.0000      0.0000  
 7761.2081      4182.1515      310.4871      -3579.0566      4246.1172

## Supplementary Text 6

|                         |             |            |             |           |
|-------------------------|-------------|------------|-------------|-----------|
| 311.1317                | 25.1526     | 13.3595    | 656151.2420 | -15.8285  |
| -15.8252                |             |            |             |           |
| [21363]ENERGY: 17860000 | 3195.5101   | 5200.1692  | 5231.3318   |           |
| 332.7003                | -15873.4912 | -1745.1052 | 0.0000      | 0.0000    |
| 7842.0687               | 4183.1836   | 313.7220   | -3658.8851  | 4245.9436 |
| 310.8472                | 116.9207    | 81.2338    | 656151.2420 | -21.7684  |
| -21.7706                |             |            |             |           |
| [21413]ENERGY: 17870000 | 3144.7203   | 5248.9967  | 5272.8175   |           |
| 350.1388                | -15781.2947 | -1793.8626 | 0.0000      | 0.0000    |
| 7741.9954               | 4183.5114   | 309.7185   | -3558.4840  | 4246.1382 |
| 310.9925                | 29.0703     | -12.7122   | 656151.2420 | -21.2467  |
| -21.2611                |             |            |             |           |
| [21449]ENERGY: 17880000 | 3157.4625   | 5230.3974  | 5334.8184   |           |
| 344.6100                | -15843.4945 | -1782.2131 | 0.0000      | 0.0000    |
| 7742.4844               | 4184.0651   | 309.7381   | -3558.4193  | 4246.9056 |
| 311.0673                | 124.3004    | 2.4444     | 656151.2420 | -20.6490  |
| -20.6262                |             |            |             |           |
| [21499]ENERGY: 17890000 | 3235.6304   | 5161.6801  | 5275.3094   |           |
| 351.6041                | -15815.1361 | -1819.8652 | 0.0000      | 0.0000    |
| 7798.1503               | 4187.3731   | 311.9650   | -3610.7772  | 4247.6054 |
| 311.2319                | 210.1370    | 109.3306   | 656151.2420 | -17.1164  |
| -17.1269                |             |            |             |           |
| [21538]ENERGY: 17900000 | 3202.6299   | 5262.4204  | 5254.2185   |           |
| 332.8490                | -15886.1167 | -1755.8978 | 0.0000      | 0.0000    |
| 7771.1170               | 4181.2204   | 310.8835   | -3589.8966  | 4245.6908 |
| 311.1732                | 36.8919     | 98.0944    | 656151.2420 | -19.8241  |
| -19.8152                |             |            |             |           |
| [21588]ENERGY: 17910000 | 3208.7156   | 5186.7783  | 5302.0525   |           |
| 332.3617                | -15885.7004 | -1748.7330 | 0.0000      | 0.0000    |
| 7785.4692               | 4180.9441   | 311.4577   | -3604.5251  | 4245.3958 |
| 311.1602                | 6.3515      | -22.7988   | 656151.2420 | -17.6267  |
| -17.6278                |             |            |             |           |
| [21624]ENERGY: 17920000 | 3165.8669   | 5289.6236  | 5259.0609   |           |
| 352.1918                | -15857.5785 | -1805.4625 | 0.0000      | 0.0000    |
| 7778.5402               | 4182.2424   | 311.1805   | -3596.2979  | 4247.2090 |
| 311.0775                | -42.5836    | -102.6461  | 656151.2420 | -17.8617  |
| -17.8676                |             |            |             |           |
| [21674]ENERGY: 17930000 | 3198.3246   | 5249.9392  | 5248.9862   |           |
| 369.8704                | -15863.0552 | -1814.9448 | 0.0000      | 0.0000    |
| 7795.3817               | 4184.5021   | 311.8542   | -3610.8796  | 4246.7015 |
| 311.2768                | -38.2437    | -5.2913    | 656151.2420 | -18.0594  |
| -18.0563                |             |            |             |           |
| [21710]ENERGY: 17940000 | 3223.2343   | 5291.4491  | 5268.9434   |           |
| 327.7165                | -15893.9321 | -1758.8417 | 0.0000      | 0.0000    |
| 7723.4591               | 4182.0285   | 308.9770   | -3541.4306  | 4246.2900 |
| 311.2838                | -62.2342    | -63.9690   | 656151.2420 | -21.2317  |
| -21.2323                |             |            |             |           |
| [21760]ENERGY: 17950000 | 3226.1834   | 5309.7378  | 5247.4138   |           |
| 324.2704                | -15910.7958 | -1763.5228 | 0.0000      | 0.0000    |
| 7752.7359               | 4186.0227   | 310.1482   | -3566.7132  | 4246.4522 |
| 311.2923                | 97.7199     | 40.4653    | 656151.2420 | -22.3253  |
| -22.3463                |             |            |             |           |
| [21796]ENERGY: 17960000 | 3182.1951   | 5171.7164  | 5295.7460   |           |
| 355.7370                | -15905.8848 | -1754.9758 | 0.0000      | 0.0000    |

## Supplementary Text 6

|                         |             |            |             |           |
|-------------------------|-------------|------------|-------------|-----------|
| 7833.5164               | 4178.0503   | 313.3798   | -3655.4661  | 4246.8155 |
| 311.2082                | 119.5378    | 49.4677    | 656151.2420 | -20.4237  |
| -20.3984                |             |            |             |           |
| [21846]ENERGY: 17970000 | 3253.8324   | 5229.8277  | 5283.8735   |           |
| 323.8073                | -15980.2427 | -1737.4122 | 0.0000      | 0.0000    |
| 7809.4441               | 4183.1301   | 312.4168   | -3626.3140  | 4246.4516 |
| 311.0905                | 4.9211      | 14.3944    | 656151.2420 | -20.2088  |
| -20.2180                |             |            |             |           |
| [21882]ENERGY: 17980000 | 3236.1600   | 5156.2709  | 5280.9513   |           |
| 335.0934                | -15837.1782 | -1780.1875 | 0.0000      | 0.0000    |
| 7790.6965               | 4181.8063   | 311.6668   | -3608.8902  | 4246.2836 |
| 311.0758                | -4.9536     | 74.1217    | 656151.2420 | -21.8446  |
| -21.8368                |             |            |             |           |
| [21932]ENERGY: 17990000 | 3211.7358   | 5333.9772  | 5265.6732   |           |
| 308.2340                | -15833.7123 | -1858.3520 | 0.0000      | 0.0000    |
| 7757.3809               | 4184.9368   | 310.3340   | -3572.4441  | 4246.8796 |
| 311.0697                | -12.4917    | -105.7053  | 656151.2420 | -23.0281  |
| -23.0335                |             |            |             |           |
| [21971]ENERGY: 18000000 | 3220.4241   | 5302.3782  | 5300.2244   |           |
| 348.0062                | -15870.1012 | -1774.4717 | 0.0000      | 0.0000    |
| 7663.5403               | 4190.0003   | 306.5799   | -3473.5401  | 4249.4616 |
| 311.1959                | 30.0186     | -10.0013   | 656151.2420 | -20.4985  |
| -20.5057                |             |            |             |           |
| [22021]ENERGY: 18010000 | 3113.9640   | 5231.6759  | 5280.7696   |           |
| 330.3778                | -15896.0900 | -1702.4192 | 0.0000      | 0.0000    |
| 7825.3245               | 4183.6025   | 313.0521   | -3641.7219  | 4248.1499 |
| 310.9694                | -35.4366    | -72.9843   | 656151.2420 | -20.5133  |
| -20.4982                |             |            |             |           |
| [22057]ENERGY: 18020000 | 3217.2947   | 5158.9525  | 5251.8344   |           |
| 308.6986                | -15867.9477 | -1732.5553 | 0.0000      | 0.0000    |
| 7847.9805               | 4184.2577   | 313.9585   | -3663.7228  | 4248.1774 |
| 310.9543                | -34.9822    | -8.3711    | 656151.2420 | -22.0258  |
| -22.0528                |             |            |             |           |
| [22107]ENERGY: 18030000 | 3237.3085   | 5308.1106  | 5269.4668   |           |
| 341.9738                | -15940.7942 | -1733.5211 | 0.0000      | 0.0000    |
| 7706.0258               | 4188.5702   | 308.2796   | -3517.4556  | 4250.1011 |
| 311.1188                | 133.7147    | 61.6953    | 656151.2420 | -22.7813  |
| -22.7616                |             |            |             |           |
| [22143]ENERGY: 18040000 | 3169.7267   | 5260.5343  | 5276.4319   |           |
| 352.7052                | -15850.2164 | -1782.9236 | 0.0000      | 0.0000    |
| 7759.6096               | 4185.8677   | 310.4232   | -3573.7419  | 4249.4376 |
| 311.1248                | 2.2804      | 55.3282    | 656151.2420 | -22.4899  |
| -22.4812                |             |            |             |           |
| [22193]ENERGY: 18050000 | 3301.4224   | 5244.0831  | 5275.1065   |           |
| 354.9551                | -15987.7042 | -1725.2352 | 0.0000      | 0.0000    |
| 7727.7068               | 4190.3345   | 309.1469   | -3537.3723  | 4249.5853 |
| 311.1098                | -80.3874    | -116.6872  | 656151.2420 | -23.8751  |
| -23.8857                |             |            |             |           |
| [22229]ENERGY: 18060000 | 3206.3524   | 5204.1120  | 5280.0464   |           |
| 344.2639                | -15871.1507 | -1765.1457 | 0.0000      | 0.0000    |
| 7789.5974               | 4188.0757   | 311.6228   | -3601.5216  | 4250.8157 |
| 311.0709                | 73.4543     | 65.9589    | 656151.2420 | -22.0295  |
| -22.0190                |             |            |             |           |
| [22279]ENERGY: 18070000 | 3213.4943   | 5322.2640  | 5256.0588   |           |



## Supplementary Text 6

|                         |             |            |             |           |
|-------------------------|-------------|------------|-------------|-----------|
| 335.6169                | -16021.5793 | -1790.7928 | 0.0000      | 0.0000    |
| 7867.7283               | 4182.7902   | 314.7485   | -3684.9381  | 4249.8899 |
| 311.2385                | 38.6831     | -16.0509   | 656151.2420 | -20.1967  |
| -20.2021                |             |            |             |           |
| [22315]ENERGY: 18080000 | 3192.6063   | 5194.4338  | 5289.4528   |           |
| 357.0377                | -15867.6293 | -1754.3421 | 0.0000      | 0.0000    |
| 7776.0778               | 4187.6370   | 311.0820   | -3588.4408  | 4250.6372 |
| 311.2322                | 28.1411     | -0.2035    | 656151.2420 | -21.9057  |
| -21.8969                |             |            |             |           |
| [22365]ENERGY: 18090000 | 3154.6972   | 5290.7894  | 5229.5882   |           |
| 351.3297                | -15885.7997 | -1745.1077 | 0.0000      | 0.0000    |
| 7792.1470               | 4187.6440   | 311.7248   | -3604.5029  | 4251.0024 |
| 311.1770                | -16.0960    | 4.2351     | 656151.2420 | -21.9647  |
| -21.9720                |             |            |             |           |
| [22404]ENERGY: 18100000 | 3216.8992   | 5276.7256  | 5226.7803   |           |
| 356.4559                | -15850.7389 | -1798.1400 | 0.0000      | 0.0000    |
| 7757.8906               | 4185.8728   | 310.3544   | -3572.0178  | 4250.6218 |
| 311.3728                | -72.5177    | -75.4348   | 656151.2420 | -20.6411  |
| -20.6429                |             |            |             |           |
| [22454]ENERGY: 18110000 | 3206.2218   | 5297.1529  | 5247.0174   |           |
| 340.3239                | -15831.3209 | -1832.5318 | 0.0000      | 0.0000    |
| 7763.2711               | 4190.1344   | 310.5697   | -3573.1367  | 4251.6263 |
| 311.2245                | 151.3996    | 95.8288    | 656151.2420 | -22.6843  |
| -22.6734                |             |            |             |           |
| [22490]ENERGY: 18120000 | 3243.0333   | 5194.5047  | 5277.9486   |           |
| 346.4545                | -15817.3253 | -1826.2587 | 0.0000      | 0.0000    |
| 7770.3799               | 4188.7370   | 310.8540   | -3581.6429  | 4251.7897 |
| 311.1803                | -52.5735    | -104.3692  | 656151.2420 | -19.5320  |
| -19.5429                |             |            |             |           |
| [22540]ENERGY: 18130000 | 3123.8172   | 5257.4332  | 5243.8611   |           |
| 335.7110                | -15732.1552 | -1844.4006 | 0.0000      | 0.0000    |
| 7801.1225               | 4185.3893   | 312.0839   | -3615.7332  | 4251.9207 |
| 311.3056                | 90.0427     | 5.9175     | 656151.2420 | -20.9318  |
| -20.9481                |             |            |             |           |
| [22576]ENERGY: 18140000 | 3250.6952   | 5275.8757  | 5292.2124   |           |
| 345.0978                | -16013.5844 | -1695.9086 | 0.0000      | 0.0000    |
| 7732.0434               | 4186.4315   | 309.3204   | -3545.6119  | 4250.4732 |
| 311.2937                | 5.9618      | 9.2699     | 656151.2420 | -21.4476  |
| -21.4325                |             |            |             |           |
| [22626]ENERGY: 18150000 | 3290.1789   | 5222.3392  | 5296.0009   |           |
| 333.8087                | -15959.1368 | -1733.8710 | 0.0000      | 0.0000    |
| 7738.8714               | 4188.1912   | 309.5935   | -3550.6801  | 4250.3399 |
| 311.2653                | -108.1687   | -34.1884   | 656151.2420 | -24.1210  |
| -24.1203                |             |            |             |           |
| [22662]ENERGY: 18160000 | 3252.6201   | 5232.2910  | 5197.4991   |           |
| 358.5563                | -15810.7329 | -1760.0608 | 0.0000      | 0.0000    |
| 7721.2879               | 4191.4607   | 308.8901   | -3529.8273  | 4251.7574 |
| 311.1292                | -14.7194    | -69.1671   | 656151.2420 | -23.9685  |
| -23.9695                |             |            |             |           |
| [22712]ENERGY: 18170000 | 3211.0855   | 5242.1224  | 5313.4381   |           |
| 338.6192                | -15808.8440 | -1792.6114 | 0.0000      | 0.0000    |
| 7686.2873               | 4190.0972   | 307.4899   | -3496.1901  | 4252.1563 |
| 311.2756                | -82.5729    | -47.7544   | 656151.2420 | -20.9812  |
| -20.9834                |             |            |             |           |

## Supplementary Text 6

|                         |             |            |             |
|-------------------------|-------------|------------|-------------|
| [22748]ENERGY: 18180000 | 3135.4693   | 5293.6655  | 5280.1729   |
| 335.2225                | -15827.9360 | -1727.5192 | 0.0000      |
| 7704.0501               | 4193.1252   | 308.2005   | -3510.9249  |
| 311.2096                | 118.3131    | 16.8747    | 656151.2420 |
| -25.5322                |             |            | -25.5318    |
| [22798]ENERGY: 18190000 | 3174.2237   | 5273.2053  | 5293.7020   |
| 340.3348                | -15908.1870 | -1784.4674 | 0.0000      |
| 7801.1888               | 4190.0001   | 312.0866   | -3611.1887  |
| 311.0553                | 35.2077     | 57.4034    | 656151.2420 |
| -23.5066                |             |            | -23.5194    |
| [22837]ENERGY: 18200000 | 3150.7507   | 5254.8212  | 5279.8162   |
| 358.2660                | -15922.4413 | -1769.8438 | 0.0000      |
| 7837.6337               | 4189.0027   | 313.5445   | -3648.6310  |
| 311.3107                | 3.2577      | -41.9341   | 656151.2420 |
| -21.6062                |             |            | -21.5995    |
| [22887]ENERGY: 18210000 | 3236.1725   | 5291.0575  | 5198.4203   |
| 333.8263                | -15883.2317 | -1716.1045 | 0.0000      |
| 7728.4658               | 4188.6062   | 309.1773   | -3539.8596  |
| 311.2036                | 84.9223     | -28.6298   | 656151.2420 |
| -24.2450                |             |            | -24.2331    |
| [22923]ENERGY: 18220000 | 3220.3523   | 5293.3704  | 5264.8218   |
| 366.8170                | -15904.2764 | -1803.3673 | 0.0000      |
| 7752.1702               | 4189.8880   | 310.1256   | -3562.2822  |
| 311.2393                | -7.9440     | -105.8202  | 656151.2420 |
| -24.5739                |             |            | -24.5701    |
| [22973]ENERGY: 18230000 | 3173.1195   | 5185.8815  | 5286.1290   |
| 328.8427                | -15773.5684 | -1788.6742 | 0.0000      |
| 7779.1681               | 4190.8983   | 311.2056   | -3588.2699  |
| 311.0717                | -48.7586    | -64.8092   | 656151.2420 |
| -24.3398                |             |            | -24.3578    |
| [23009]ENERGY: 18240000 | 3215.0399   | 5231.6024  | 5247.9098   |
| 353.5853                | -15841.2126 | -1832.6927 | 0.0000      |
| 7815.7012               | 4189.9333   | 312.6671   | -3625.7679  |
| 311.0761                | -55.0537    | -4.1185    | 656151.2420 |
| -27.3950                |             |            | -27.3854    |
| [23059]ENERGY: 18250000 | 3188.4741   | 5331.7899  | 5248.5402   |
| 339.7751                | -15805.8121 | -1793.2143 | 0.0000      |
| 7686.6573               | 4196.2103   | 307.5047   | -3490.4471  |
| 311.3003                | -26.0114    | -29.1990   | 656151.2420 |
| -23.4899                |             |            | -23.4844    |
| [23095]ENERGY: 18260000 | 3196.3799   | 5168.4361  | 5289.0132   |
| 358.4049                | -15816.0092 | -1804.6378 | 0.0000      |
| 7800.9664               | 4192.5535   | 312.0777   | -3608.4128  |
| 311.2848                | 26.0194     | -5.0648    | 656151.2420 |
| -24.0437                |             |            | -24.0524    |
| [23145]ENERGY: 18270000 | 3241.4982   | 5141.3020  | 5260.1375   |
| 340.2965                | -15802.5536 | -1751.2783 | 0.0000      |
| 7763.4237               | 4192.8260   | 310.5758   | -3570.5977  |
| 311.4200                | -155.6518   | -149.8233  | 656151.2420 |
| -24.5285                |             |            | -24.5386    |
| [23181]ENERGY: 18280000 | 3181.3881   | 5237.4930  | 5289.1673   |
| 347.1472                | -15856.6509 | -1824.9130 | 0.0000      |
| 7816.3129               | 4189.9447   | 312.6916   | -3626.3682  |
| 311.0822                | -136.8955   | -129.8079  | 656151.2420 |
|                         |             |            | -21.7957    |

## Supplementary Text 6

-21.8015  
[23231]ENERGY: 18290000      3232.1602      5300.0905      5300.7907  
336.8615      -15961.8668      -1726.6485      0.0000      0.0000  
7712.7510      4194.1387      308.5486      -3518.6123      4255.1257  
311.1676      8.3476      1.1730      656151.2420      -23.1647  
-23.1689  
[23270]ENERGY: 18300000      3179.5981      5162.4267      5283.5926  
340.2140      -15749.2182      -1768.2168      0.0000      0.0000  
7749.3791      4197.7755      310.0139      -3551.6035      4255.9474  
311.0879      18.9374      -40.9810      656151.2420      -22.6639  
-22.6521  
[23320]ENERGY: 18310000      3269.7110      5299.8125      5238.5426  
362.1019      -15857.6088      -1806.4639      0.0000      0.0000  
7690.3151      4196.4104      307.6511      -3493.9047      4255.7713  
311.3201      -226.4143      -216.5043      656151.2420      -23.8132  
-23.8233  
[23356]ENERGY: 18320000      3130.7890      5190.4101      5316.0482  
339.5156      -15813.0794      -1774.6357      0.0000      0.0000  
7801.6773      4190.7251      312.1061      -3610.9522      4256.6620  
311.1749      -250.5538      -95.5805      656151.2420      -20.6933  
-20.6902  
[23406]ENERGY: 18330000      3139.0622      5179.4125      5247.3204  
358.4065      -15805.5817      -1795.7106      0.0000      0.0000  
7869.2976      4192.2068      314.8112      -3677.0908      4256.9810  
311.1794      137.1346      91.4735      656151.2420      -18.0548  
-18.0540  
[23442]ENERGY: 18340000      3244.0703      5183.5332      5244.3716  
372.4888      -15883.2453      -1838.8012      0.0000      0.0000  
7869.7732      4192.1906      314.8303      -3677.5826      4256.2561  
311.1884      -20.7152      -47.9848      656151.2420      -24.0908  
-24.0933  
[23492]ENERGY: 18350000      3169.1360      5208.3050      5278.3349  
353.5082      -15842.4812      -1747.4957      0.0000      0.0000  
7778.4394      4197.7466      311.1765      -3580.6928      4257.5256  
311.1028      -47.1950      -132.5688      656151.2420      -22.0368  
-22.0357  
[23528]ENERGY: 18360000      3157.4360      5146.0545      5297.7703  
344.5201      -15842.6693      -1755.3592      0.0000      0.0000  
7845.5808      4193.3333      313.8625      -3652.2474      4257.1036  
311.1888      6.7590      -96.2868      656151.2420      -26.3803  
-26.3893  
[23578]ENERGY: 18370000      3242.5277      5271.0829      5240.7898  
358.7936      -15953.9707      -1693.5810      0.0000      0.0000  
7729.6268      4195.2691      309.2237      -3534.3576      4257.7684  
311.2623      -0.6119      25.9782      656151.2420      -24.5426  
-24.5215  
[23614]ENERGY: 18380000      3254.1080      5142.7631      5269.0738  
320.6219      -15744.1779      -1833.5550      0.0000      0.0000  
7787.5643      4196.3981      311.5415      -3591.1662      4257.8783  
311.1251      -100.0887      -147.9576      656151.2420      -24.8935  
-24.9201  
[23664]ENERGY: 18390000      3216.4769      5294.6533      5273.9491  
334.7293      -15840.0953      -1854.2192      0.0000      0.0000  
7768.0504      4193.5445      310.7609      -3574.5059      4258.5785

## Supplementary Text 6

|                         |             |            |             |           |
|-------------------------|-------------|------------|-------------|-----------|
| 311.3870                | -70.1805    | -59.4834   | 656151.2420 | -26.2914  |
| -26.2781                |             |            |             |           |
| [23703]ENERGY: 18400000 | 3230.5467   | 5250.7926  | 5223.2116   |           |
| 334.5323                | -15866.7630 | -1735.4468 | 0.0000      | 0.0000    |
| 7756.7411               | 4193.6146   | 310.3084   | -3563.1265  | 4258.5047 |
| 311.1232                | 119.2192    | 94.4343    | 656151.2420 | -23.2996  |
| -23.3037                |             |            |             |           |
| [23753]ENERGY: 18410000 | 3199.4494   | 5276.4482  | 5265.8712   |           |
| 351.8315                | -15933.1930 | -1732.2084 | 0.0000      | 0.0000    |
| 7767.2625               | 4195.4612   | 310.7293   | -3571.8012  | 4258.3886 |
| 311.2432                | 9.4176      | 9.0861     | 656151.2420 | -24.5851  |
| -24.5767                |             |            |             |           |
| [23789]ENERGY: 18420000 | 3210.2574   | 5265.3844  | 5235.0722   |           |
| 363.3186                | -15878.7932 | -1761.5102 | 0.0000      | 0.0000    |
| 7762.9253               | 4196.6545   | 310.5558   | -3566.2708  | 4259.4094 |
| 311.3634                | 143.0651    | 64.4394    | 656151.2420 | -26.0392  |
| -26.0379                |             |            |             |           |
| [23839]ENERGY: 18430000 | 3236.0237   | 5288.1618  | 5210.4836   |           |
| 319.4482                | -15824.0834 | -1770.2308 | 0.0000      | 0.0000    |
| 7737.1318               | 4196.9348   | 309.5240   | -3540.1970  | 4258.1743 |
| 311.4110                | -110.0995   | -179.7882  | 656151.2420 | -24.8280  |
| -24.8567                |             |            |             |           |
| [23875]ENERGY: 18440000 | 3207.9693   | 5176.5562  | 5229.2290   |           |
| 331.9526                | -15879.6377 | -1718.1181 | 0.0000      | 0.0000    |
| 7845.6589               | 4193.6101   | 313.8656   | -3652.0489  | 4257.9492 |
| 311.4385                | -90.5194    | -87.2569   | 656151.2420 | -22.8386  |
| -22.8078                |             |            |             |           |
| [23925]ENERGY: 18450000 | 3148.7212   | 5322.5845  | 5234.9121   |           |
| 358.6297                | -15893.5515 | -1700.2025 | 0.0000      | 0.0000    |
| 7727.1746               | 4198.2681   | 309.1256   | -3528.9065  | 4259.4736 |
| 311.3843                | 121.5574    | 92.3505    | 656151.2420 | -26.2684  |
| -26.2722                |             |            |             |           |
| [23961]ENERGY: 18460000 | 3228.6592   | 5223.8496  | 5247.6768   |           |
| 330.3710                | -15825.7906 | -1837.7832 | 0.0000      | 0.0000    |
| 7827.4062               | 4194.3889   | 313.1354   | -3633.0173  | 4260.5514 |
| 311.3913                | -83.0887    | -79.6934   | 656151.2420 | -22.4120  |
| -22.4222                |             |            |             |           |
| [24011]ENERGY: 18470000 | 3242.3389   | 5181.1555  | 5272.1043   |           |
| 322.6440                | -15801.7806 | -1829.6938 | 0.0000      | 0.0000    |
| 7811.7102               | 4198.4785   | 312.5075   | -3613.2317  | 4260.9022 |
| 311.1898                | -139.7910   | -215.0665  | 656151.2420 | -24.3132  |
| -24.3234                |             |            |             |           |
| [24047]ENERGY: 18480000 | 3170.6032   | 5298.0976  | 5248.6609   |           |
| 346.9329                | -15799.4970 | -1845.9097 | 0.0000      | 0.0000    |
| 7779.9190               | 4198.8069   | 311.2357   | -3581.1122  | 4260.8429 |
| 311.3288                | -53.4726    | 24.1567    | 656151.2420 | -20.7776  |
| -20.7545                |             |            |             |           |
| [24097]ENERGY: 18490000 | 3204.9495   | 5272.2302  | 5306.1512   |           |
| 342.8123                | -15878.9629 | -1776.5694 | 0.0000      | 0.0000    |
| 7730.1164               | 4200.7273   | 309.2433   | -3529.3890  | 4262.3450 |
| 311.3258                | 4.1987      | -39.6152   | 656151.2420 | -14.3670  |
| -14.3811                |             |            |             |           |
| [24136]ENERGY: 18500000 | 3188.9240   | 5175.6698  | 5251.8961   |           |
| 336.2781                | -15872.3694 | -1672.5294 | 0.0000      | 0.0000    |

## Supplementary Text 6

|                         |             |            |             |           |
|-------------------------|-------------|------------|-------------|-----------|
| 7794.9421               | 4202.8113   | 311.8367   | -3592.1308  | 4261.9251 |
| 311.4158                | 13.9923     | 6.0747     | 656151.2420 | -15.1565  |
| -15.1690                |             |            |             |           |
| [24186]ENERGY: 18510000 | 3258.2534   | 5193.8193  | 5290.7450   |           |
| 314.5467                | -15831.1452 | -1814.4586 | 0.0000      | 0.0000    |
| 7789.2260               | 4200.9866   | 311.6080   | -3588.2394  | 4263.5856 |
| 311.3829                | -27.4879    | -66.5688   | 656151.2420 | -18.8662  |
| -18.8529                |             |            |             |           |
| [24222]ENERGY: 18520000 | 3186.4449   | 5210.6786  | 5269.1525   |           |
| 372.4317                | -15834.7527 | -1832.0097 | 0.0000      | 0.0000    |
| 7826.3482               | 4198.2934   | 313.0931   | -3628.0547  | 4262.3057 |
| 311.3485                | 2.0505      | -8.9624    | 656151.2420 | -16.3078  |
| -16.3051                |             |            |             |           |
| [24272]ENERGY: 18530000 | 3256.4429   | 5230.1089  | 5265.8253   |           |
| 332.8689                | -15915.8275 | -1770.5653 | 0.0000      | 0.0000    |
| 7799.4564               | 4198.3097   | 312.0173   | -3601.1467  | 4262.7855 |
| 311.4634                | -21.9600    | -41.9894   | 656151.2420 | -21.0793  |
| -21.0775                |             |            |             |           |
| [24308]ENERGY: 18540000 | 3261.5321   | 5239.9005  | 5289.2183   |           |
| 345.8885                | -15883.1136 | -1870.7346 | 0.0000      | 0.0000    |
| 7816.7459               | 4199.4371   | 312.7089   | -3617.3088  | 4263.9505 |
| 311.4275                | -170.8362   | -147.5692  | 656151.2420 | -24.5747  |
| -24.5716                |             |            |             |           |
| [24358]ENERGY: 18550000 | 3196.7637   | 5243.0360  | 5234.2907   |           |
| 341.5551                | -15764.6519 | -1819.4253 | 0.0000      | 0.0000    |
| 7771.8216               | 4203.3899   | 310.9117   | -3568.4318  | 4263.3307 |
| 311.3402                | 22.2363     | -21.6162   | 656151.2420 | -20.7232  |
| -20.7420                |             |            |             |           |
| [24394]ENERGY: 18560000 | 3202.0902   | 5246.3685  | 5265.5910   |           |
| 355.5751                | -15861.8311 | -1829.0490 | 0.0000      | 0.0000    |
| 7820.9332               | 4199.6779   | 312.8764   | -3621.2554  | 4264.0549 |
| 311.5421                | 168.4477    | 42.9485    | 656151.2420 | -22.8448  |
| -22.8263                |             |            |             |           |
| [24444]ENERGY: 18570000 | 3150.9508   | 5171.1671  | 5239.7447   |           |
| 324.2117                | -15839.6300 | -1708.1853 | 0.0000      | 0.0000    |
| 7860.1876               | 4198.4464   | 314.4468   | -3661.7412  | 4264.5771 |
| 311.4890                | 15.0685     | 15.8200    | 656151.2420 | -19.6501  |
| -19.6641                |             |            |             |           |
| [24480]ENERGY: 18580000 | 3224.8324   | 5156.3105  | 5269.9865   |           |
| 346.0063                | -15883.3928 | -1722.1069 | 0.0000      | 0.0000    |
| 7808.0924               | 4199.7284   | 312.3627   | -3608.3640  | 4263.8447 |
| 311.5625                | 7.2119      | -32.8445   | 656151.2420 | -19.8393  |
| -19.8148                |             |            |             |           |
| [24530]ENERGY: 18590000 | 3205.1308   | 5179.9768  | 5233.5194   |           |
| 341.4324                | -15900.2593 | -1717.9256 | 0.0000      | 0.0000    |
| 7857.9858               | 4199.8602   | 314.3587   | -3658.1255  | 4264.3472 |
| 311.5174                | 81.1697     | 16.7574    | 656151.2420 | -23.7404  |
| -23.7764                |             |            |             |           |
| [24569]ENERGY: 18600000 | 3269.1209   | 5329.9314  | 5232.2576   |           |
| 315.5085                | -15884.9041 | -1821.3423 | 0.0000      | 0.0000    |
| 7761.0505               | 4201.6226   | 310.4808   | -3559.4279  | 4265.8260 |
| 311.5903                | -48.1135    | -37.2641   | 656151.2420 | -19.1839  |
| -19.1577                |             |            |             |           |
| [24619]ENERGY: 18610000 | 3213.7232   | 5278.3893  | 5283.9160   |           |

## Supplementary Text 6

|                         |             |            |             |           |
|-------------------------|-------------|------------|-------------|-----------|
| 343.0298                | -15882.1823 | -1802.0531 | 0.0000      | 0.0000    |
| 7765.9231               | 4200.7459   | 310.6758   | -3565.1773  | 4265.0984 |
| 311.2966                | -49.3131    | -46.2455   | 656151.2420 | -15.9917  |
| -15.9847                |             |            |             |           |
| [24655]ENERGY: 18620000 | 3211.2856   | 5289.2275  | 5239.8078   |           |
| 330.7408                | -15828.7701 | -1747.8322 | 0.0000      | 0.0000    |
| 7706.3163               | 4200.7759   | 308.2912   | -3505.5404  | 4266.6246 |
| 311.3715                | -67.5482    | -3.7218    | 656151.2420 | -19.4621  |
| -19.4854                |             |            |             |           |
| [24705]ENERGY: 18630000 | 3171.8878   | 5234.8658  | 5278.9321   |           |
| 339.4221                | -15755.0542 | -1775.7485 | 0.0000      | 0.0000    |
| 7714.4682               | 4208.7733   | 308.6173   | -3505.6949  | 4267.5263 |
| 311.3947                | 88.2581     | -6.3960    | 656151.2420 | -19.3942  |
| -19.3930                |             |            |             |           |
| [24741]ENERGY: 18640000 | 3208.9579   | 5282.4290  | 5261.3386   |           |
| 344.6524                | -15952.2568 | -1708.2880 | 0.0000      | 0.0000    |
| 7770.1295               | 4206.9626   | 310.8440   | -3563.1669  | 4267.3262 |
| 311.3761                | 145.7854    | -18.6257   | 656151.2420 | -21.3716  |
| -21.3638                |             |            |             |           |
| [24791]ENERGY: 18650000 | 3266.7481   | 5264.1732  | 5282.6584   |           |
| 327.1827                | -15904.9553 | -1789.4716 | 0.0000      | 0.0000    |
| 7761.2325               | 4207.5679   | 310.4881   | -3553.6646  | 4267.8763 |
| 311.4534                | -167.8865   | -186.1061  | 656151.2420 | -21.9257  |
| -21.9325                |             |            |             |           |
| [24827]ENERGY: 18660000 | 3284.4900   | 5244.2294  | 5275.1540   |           |
| 333.9417                | -15906.1861 | -1818.5542 | 0.0000      | 0.0000    |
| 7792.0620               | 4205.1368   | 311.7214   | -3586.9251  | 4267.8498 |
| 311.4793                | -11.8995    | 10.4141    | 656151.2420 | -20.6446  |
| -20.6374                |             |            |             |           |
| [24877]ENERGY: 18670000 | 3191.5026   | 5300.7362  | 5255.7861   |           |
| 347.6851                | -15853.3384 | -1757.2914 | 0.0000      | 0.0000    |
| 7721.2914               | 4206.3717   | 308.8903   | -3514.9198  | 4267.9038 |
| 311.5600                | -0.2605     | -20.3404   | 656151.2420 | -23.1171  |
| -23.1136                |             |            |             |           |
| [24913]ENERGY: 18680000 | 3248.2068   | 5274.8718  | 5285.3799   |           |
| 343.6651                | -15895.0868 | -1795.7290 | 0.0000      | 0.0000    |
| 7744.3292               | 4205.6371   | 309.8119   | -3538.6921  | 4268.0703 |
| 311.5068                | 2.6605      | 9.3098     | 656151.2420 | -22.0519  |
| -22.0543                |             |            |             |           |
| [24963]ENERGY: 18690000 | 3251.5660   | 5335.7703  | 5244.7094   |           |
| 322.6511                | -15954.2478 | -1739.6169 | 0.0000      | 0.0000    |
| 7743.8861               | 4204.7182   | 309.7942   | -3539.1680  | 4267.9693 |
| 311.6388                | 31.8715     | 68.0448    | 656151.2420 | -18.8039  |
| -18.7783                |             |            |             |           |
| [25002]ENERGY: 18700000 | 3266.6647   | 5247.4954  | 5301.5357   |           |
| 331.9808                | -15846.0245 | -1783.0947 | 0.0000      | 0.0000    |
| 7688.7347               | 4207.2921   | 307.5878   | -3481.4426  | 4267.1009 |
| 311.7135                | -124.6301   | -153.5718  | 656151.2420 | -24.3873  |
| -24.4225                |             |            |             |           |
| [25052]ENERGY: 18710000 | 3189.6325   | 5236.2253  | 5318.7087   |           |
| 334.5655                | -15868.7543 | -1787.4883 | 0.0000      | 0.0000    |
| 7785.7627               | 4208.6521   | 311.4694   | -3577.1106  | 4270.3368 |
| 311.5889                | 64.6183     | 35.0236    | 656151.2420 | -22.6091  |
| -22.6084                |             |            |             |           |

## Supplementary Text 6

|                         |             |            |             |           |
|-------------------------|-------------|------------|-------------|-----------|
| [25088]ENERGY: 18720000 | 3200.3864   | 5233.7494  | 5221.1766   |           |
| 360.9096                | -15894.1478 | -1705.3675 | 0.0000      | 0.0000    |
| 7793.4260               | 4210.1327   | 311.7760   | -3583.2932  | 4270.5457 |
| 311.4408                | 48.2659     | -3.2683    | 656151.2420 | -23.9731  |
| -23.9589                |             |            |             |           |
| [25138]ENERGY: 18730000 | 3202.2772   | 5131.4210  | 5284.7424   |           |
| 336.7094                | -15855.5838 | -1767.3234 | 0.0000      | 0.0000    |
| 7873.9947               | 4206.2375   | 314.9992   | -3667.7572  | 4270.5616 |
| 311.4521                | -202.5402   | -186.3382  | 656151.2420 | -23.9088  |
| -23.8999                |             |            |             |           |
| [25174]ENERGY: 18740000 | 3192.9849   | 5177.2185  | 5251.4383   |           |
| 323.9456                | -15855.5043 | -1762.1572 | 0.0000      | 0.0000    |
| 7879.3842               | 4207.3100   | 315.2148   | -3672.0742  | 4271.3753 |
| 311.4646                | -69.2691    | -148.2279  | 656151.2420 | -22.0279  |
| -22.0447                |             |            |             |           |
| [25224]ENERGY: 18750000 | 3195.7670   | 5248.5526  | 5250.6723   |           |
| 335.0680                | -15901.8320 | -1753.9367 | 0.0000      | 0.0000    |
| 7833.4054               | 4207.6966   | 313.3754   | -3625.7088  | 4271.7909 |
| 311.5947                | -98.2360    | -101.9703  | 656151.2420 | -23.8983  |
| -23.8763                |             |            |             |           |
| [25260]ENERGY: 18760000 | 3248.6920   | 5144.5895  | 5238.3118   |           |
| 339.1119                | -15856.6853 | -1743.1355 | 0.0000      | 0.0000    |
| 7839.4001               | 4210.2846   | 313.6152   | -3629.1156  | 4270.5093 |
| 311.5533                | 37.7413     | 17.8193    | 656151.2420 | -18.3109  |
| -18.3162                |             |            |             |           |
| [25310]ENERGY: 18770000 | 3145.2523   | 5148.4521  | 5268.1190   |           |
| 394.0451                | -15814.5546 | -1731.8438 | 0.0000      | 0.0000    |
| 7798.6027               | 4208.0729   | 311.9831   | -3590.5299  | 4271.6187 |
| 311.5573                | -96.9767    | -63.4084   | 656151.2420 | -22.4987  |
| -22.5066                |             |            |             |           |
| [25346]ENERGY: 18780000 | 3166.9264   | 5206.8925  | 5275.1720   |           |
| 328.5833                | -15793.6116 | -1800.1408 | 0.0000      | 0.0000    |
| 7825.4715               | 4209.2933   | 313.0580   | -3616.1782  | 4271.4236 |
| 311.6472                | -51.8525    | -95.5492   | 656151.2420 | -24.4049  |
| -24.4091                |             |            |             |           |
| [25396]ENERGY: 18790000 | 3225.1947   | 5255.4523  | 5229.0709   |           |
| 310.0809                | -15865.2964 | -1749.0416 | 0.0000      | 0.0000    |
| 7803.1384               | 4208.5992   | 312.1645   | -3594.5392  | 4271.7219 |
| 311.5269                | 18.4320     | -19.9582   | 656151.2420 | -25.3975  |
| -25.4156                |             |            |             |           |
| [25435]ENERGY: 18800000 | 3197.8927   | 5316.8302  | 5228.9011   |           |
| 323.3791                | -15853.2084 | -1728.9506 | 0.0000      | 0.0000    |
| 7727.1304               | 4211.9745   | 309.1238   | -3515.1559  | 4273.5633 |
| 311.1949                | 101.4114    | -21.4231   | 656151.2420 | -25.4616  |
| -25.4421                |             |            |             |           |
| [25485]ENERGY: 18810000 | 3214.0973   | 5298.5369  | 5232.1436   |           |
| 325.5821                | -15889.5606 | -1711.4160 | 0.0000      | 0.0000    |
| 7740.1907               | 4209.5740   | 309.6463   | -3530.6167  | 4274.2797 |
| 311.4646                | 51.3580     | 6.2279     | 656151.2420 | -21.4194  |
| -21.4255                |             |            |             |           |
| [25521]ENERGY: 18820000 | 3171.2499   | 5229.3320  | 5245.7531   |           |
| 338.3921                | -15925.9280 | -1702.3287 | 0.0000      | 0.0000    |
| 7855.4104               | 4211.8807   | 314.2557   | -3643.5297  | 4274.4655 |
| 311.4550                | 198.6687    | 135.9164   | 656151.2420 | -23.3701  |

Supplementary Text 6

-23.3500  
 [25571]ENERGY: 18830000 3249.3731 5256.4895 5257.2276  
 351.9846 -15926.4738 -1796.4662 0.0000 0.0000  
 7816.5284 4208.6632 312.7002 -3607.8652 4274.0501  
 311.3120 -217.3022 -153.3817 656151.2420 -27.4467  
 -27.4424  
 [25607]ENERGY: 18840000 3243.7460 5247.7638 5227.2107  
 342.4585 -15888.6404 -1724.1972 0.0000 0.0000  
 7764.6294 4212.9708 310.6240 -3551.6586 4274.3657  
 311.3267 134.6981 32.8906 656151.2420 -23.4099  
 -23.4220  
 [25657]ENERGY: 18850000 3261.9875 5273.0315 5236.6384  
 326.1320 -15829.2669 -1800.5301 0.0000 0.0000  
 7744.5014 4212.4938 309.8188 -3532.0076 4274.0200  
 311.3694 -89.7018 -134.8475 656151.2420 -24.4592  
 -24.4640  
 [25693]ENERGY: 18860000 3170.6323 5243.6213 5260.5917  
 349.3229 -15807.9798 -1801.3942 0.0000 0.0000  
 7794.6662 4209.4604 311.8256 -3585.2058 4274.3976  
 311.4207 -69.1057 -142.1179 656151.2420 -24.3086  
 -24.3107  
 [25743]ENERGY: 18870000 3205.6698 5281.2523 5270.4354  
 308.2749 -15802.9702 -1821.1944 0.0000 0.0000  
 7768.2441 4209.7120 310.7686 -3558.5322 4274.8721  
 311.4927 -130.9347 -105.0386 656151.2420 -26.3222  
 -26.3251  
 [25779]ENERGY: 18880000 3228.2015 5207.6181 5241.8038  
 342.6997 -15805.7727 -1805.5292 0.0000 0.0000  
 7801.6086 4210.6299 312.1033 -3590.9787 4276.1066  
 311.4672 -31.1676 -116.8420 656151.2420 -21.0729  
 -21.0647  
 [25829]ENERGY: 18890000 3214.4753 5236.3238 5229.2577  
 335.7125 -15787.5703 -1727.0719 0.0000 0.0000  
 7714.6299 4215.7569 308.6238 -3498.8730 4275.1351  
 311.3772 -251.2220 -173.8620 656151.2420 -24.8280  
 -24.8290  
 [25868]ENERGY: 18900000 3270.8701 5243.6565 5244.7368  
 326.4965 -15934.6338 -1705.1269 0.0000 0.0000  
 7767.4380 4213.4371 310.7364 -3554.0008 4274.9252  
 311.3119 62.8014 43.9184 656151.2420 -25.7227  
 -25.7311  
 [25918]ENERGY: 18910000 3186.2923 5274.5862 5254.8708  
 334.0375 -15884.6443 -1770.8415 0.0000 0.0000  
 7820.1435 4214.4445 312.8448 -3605.6990 4275.6005  
 311.5136 7.4275 -7.6151 656151.2420 -27.2069  
 -27.2100  
 [25954]ENERGY: 18920000 3211.9576 5171.4808 5261.7004  
 348.1306 -15771.9896 -1825.3462 0.0000 0.0000  
 7816.3918 4212.3253 312.6948 -3604.0665 4275.9938  
 311.6131 -139.6379 -116.6782 656151.2420 -23.8122  
 -23.7966  
 [26004]ENERGY: 18930000 3229.8767 5212.1297 5227.7846  
 354.8447 -15871.6752 -1688.9263 0.0000 0.0000  
 7750.1069 4214.1412 310.0430 -3535.9657 4274.8700



## Supplementary Text 6

|                         |             |            |             |           |
|-------------------------|-------------|------------|-------------|-----------|
| 311.5225                | -1.5991     | -0.8520    | 656151.2420 | -17.8288  |
| -17.8239                |             |            |             |           |
| [26040]ENERGY: 18940000 | 3274.3048   | 5221.7301  | 5255.7245   |           |
| 328.3274                | -15768.0672 | -1752.4022 | 0.0000      | 0.0000    |
| 7656.8287               | 4216.4460   | 306.3114   | -3440.3827  | 4274.7795 |
| 311.3706                | 37.9140     | -23.3242   | 656151.2420 | -19.1007  |
| -19.1160                |             |            |             |           |
| [26090]ENERGY: 18950000 | 3170.0297   | 5387.2014  | 5251.1461   |           |
| 337.6021                | -15947.3424 | -1760.7175 | 0.0000      | 0.0000    |
| 7772.7256               | 4210.6450   | 310.9479   | -3562.0806  | 4273.7586 |
| 311.5085                | 12.0821     | 11.7159    | 656151.2420 | -25.2121  |
| -25.2031                |             |            |             |           |
| [26126]ENERGY: 18960000 | 3294.8892   | 5244.8565  | 5237.1547   |           |
| 349.8718                | -15858.8100 | -1711.1032 | 0.0000      | 0.0000    |
| 7653.6144               | 4210.4733   | 306.1828   | -3443.1411  | 4272.6254 |
| 311.6819                | -132.6395   | -43.9503   | 656151.2420 | -21.5223  |
| -21.5296                |             |            |             |           |
| [26176]ENERGY: 18970000 | 3160.6619   | 5261.2421  | 5243.0414   |           |
| 334.9895                | -15805.5977 | -1776.1088 | 0.0000      | 0.0000    |
| 7789.6932               | 4207.9216   | 311.6267   | -3581.7716  | 4273.0493 |
| 311.5832                | 11.1639     | -5.8585    | 656151.2420 | -24.4734  |
| -24.4698                |             |            |             |           |
| [26212]ENERGY: 18980000 | 3238.1065   | 5145.8058  | 5344.9909   |           |
| 356.1057                | -15932.3947 | -1740.1529 | 0.0000      | 0.0000    |
| 7793.7755               | 4206.2368   | 311.7900   | -3587.5387  | 4272.6108 |
| 311.5511                | -168.9727   | -177.6174  | 656151.2420 | -21.5334  |
| -21.5468                |             |            |             |           |
| [26262]ENERGY: 18990000 | 3182.9210   | 5268.0933  | 5243.3434   |           |
| 333.4008                | -15838.7445 | -1742.9050 | 0.0000      | 0.0000    |
| 7765.9817               | 4212.0907   | 310.6781   | -3553.8910  | 4274.1258 |
| 311.6375                | -27.0330    | -60.1580   | 656151.2420 | -19.2794  |
| -19.2787                |             |            |             |           |
| [26301]ENERGY: 19000000 | 3189.0796   | 5164.3158  | 5276.9657   |           |
| 341.3293                | -15824.8158 | -1731.9027 | 0.0000      | 0.0000    |
| 7793.5371               | 4208.5090   | 311.7805   | -3585.0282  | 4274.6704 |
| 311.5290                | 90.2209     | 82.6468    | 656151.2420 | -24.0524  |
| -24.0473                |             |            |             |           |
| [26351]ENERGY: 19010000 | 3224.2466   | 5160.3881  | 5227.4206   |           |
| 341.7625                | -15784.4578 | -1751.3502 | 0.0000      | 0.0000    |
| 7797.6570               | 4215.6668   | 311.9453   | -3581.9902  | 4276.4295 |
| 311.6450                | 36.4705     | -105.6456  | 656151.2420 | -24.6516  |
| -24.6571                |             |            |             |           |
| [26387]ENERGY: 19020000 | 3183.1314   | 5302.8879  | 5283.4156   |           |
| 340.1460                | -15906.1405 | -1813.3864 | 0.0000      | 0.0000    |
| 7819.7838               | 4209.8378   | 312.8304   | -3609.9460  | 4275.0890 |
| 311.5014                | 16.9885     | 32.0425    | 656151.2420 | -19.4178  |
| -19.3922                |             |            |             |           |
| [26437]ENERGY: 19030000 | 3199.4658   | 5229.7022  | 5222.6807   |           |
| 346.6755                | -15777.4650 | -1835.2066 | 0.0000      | 0.0000    |
| 7827.0213               | 4212.8739   | 313.1200   | -3614.1474  | 4275.9139 |
| 311.4647                | -127.5479   | -115.1918  | 656151.2420 | -18.0224  |
| -18.0497                |             |            |             |           |
| [26473]ENERGY: 19040000 | 3194.5716   | 5287.8677  | 5243.8412   |           |
| 340.9909                | -16020.9189 | -1701.0132 | 0.0000      | 0.0000    |

## Supplementary Text 6

|                         |             |            |             |           |
|-------------------------|-------------|------------|-------------|-----------|
| 7863.4955               | 4208.8348   | 314.5791   | -3654.6607  | 4274.8999 |
| 311.6197                | 256.7021    | 187.2748   | 656151.2420 | -21.4317  |
| -21.4052                |             |            |             |           |
| [26523]ENERGY: 19050000 | 3284.1013   | 5170.3669  | 5290.6477   |           |
| 341.3316                | -15893.0757 | -1679.8525 | 0.0000      | 0.0000    |
| 7701.0542               | 4214.5736   | 308.0807   | -3486.4806  | 4274.5937 |
| 311.6010                | -108.7429   | -101.9125  | 656151.2420 | -19.7767  |
| -19.7803                |             |            |             |           |
| [26559]ENERGY: 19060000 | 3206.0148   | 5274.4291  | 5236.7657   |           |
| 354.9142                | -15864.5555 | -1753.4356 | 0.0000      | 0.0000    |
| 7757.3867               | 4211.5194   | 310.3343   | -3545.8673  | 4275.4412 |
| 311.4001                | 15.0917     | 27.0114    | 656151.2420 | -24.5982  |
| -24.6191                |             |            |             |           |
| [26609]ENERGY: 19070000 | 3265.1346   | 5247.7343  | 5256.3639   |           |
| 345.3480                | -15892.6742 | -1724.4739 | 0.0000      | 0.0000    |
| 7716.3452               | 4213.7778   | 308.6924   | -3502.5674  | 4276.1611 |
| 311.4778                | -99.3241    | -64.5508   | 656151.2420 | -23.4916  |
| -23.4689                |             |            |             |           |
| [26645]ENERGY: 19080000 | 3200.1407   | 5268.6147  | 5242.1454   |           |
| 343.8944                | -15854.4221 | -1753.7125 | 0.0000      | 0.0000    |
| 7764.2059               | 4210.8664   | 310.6071   | -3553.3395  | 4276.1113 |
| 311.2723                | -120.1771   | -51.4345   | 656151.2420 | -25.1688  |
| -25.1870                |             |            |             |           |
| [26695]ENERGY: 19090000 | 3236.2474   | 5203.8582  | 5245.6263   |           |
| 337.0956                | -15843.4117 | -1712.8261 | 0.0000      | 0.0000    |
| 7747.8779               | 4214.4675   | 309.9539   | -3533.4105  | 4276.1053 |
| 311.4253                | 83.4756     | 58.9030    | 656151.2420 | -20.7452  |
| -20.7416                |             |            |             |           |
| [26734]ENERGY: 19100000 | 3205.4690   | 5184.8996  | 5295.4348   |           |
| 342.2954                | -15863.0626 | -1795.9012 | 0.0000      | 0.0000    |
| 7843.0988               | 4212.2338   | 313.7632   | -3630.8650  | 4276.8101 |
| 311.2960                | 39.0614     | 24.0937    | 656151.2420 | -28.0838  |
| -28.0889                |             |            |             |           |
| [26784]ENERGY: 19110000 | 3196.0461   | 5296.5292  | 5305.1510   |           |
| 314.5281                | -15963.5995 | -1780.9804 | 0.0000      | 0.0000    |
| 7849.2325               | 4216.9070   | 314.0085   | -3632.3255  | 4277.8200 |
| 311.4080                | -17.9314    | 19.7886    | 656151.2420 | -24.2401  |
| -24.2175                |             |            |             |           |
| [26820]ENERGY: 19120000 | 3295.5793   | 5245.9626  | 5253.0520   |           |
| 349.5825                | -15950.1451 | -1716.7708 | 0.0000      | 0.0000    |
| 7739.9592               | 4217.2197   | 309.6371   | -3522.7395  | 4278.7209 |
| 311.4490                | -76.7263    | -37.3451   | 656151.2420 | -24.5475  |
| -24.5677                |             |            |             |           |
| [26870]ENERGY: 19130000 | 3193.8483   | 5203.0495  | 5268.4371   |           |
| 348.5596                | -15882.7383 | -1813.6709 | 0.0000      | 0.0000    |
| 7896.2027               | 4213.6879   | 315.8876   | -3682.5148  | 4279.0109 |
| 311.6205                | 7.3125      | -113.0690  | 656151.2420 | -22.8630  |
| -22.8864                |             |            |             |           |
| [26906]ENERGY: 19140000 | 3272.0464   | 5235.5085  | 5241.1680   |           |
| 354.0783                | -15870.0319 | -1789.1319 | 0.0000      | 0.0000    |
| 7773.4058               | 4217.0432   | 310.9751   | -3556.3626  | 4278.4021 |
| 311.3720                | 27.4638     | 16.9690    | 656151.2420 | -24.0067  |
| -23.9812                |             |            |             |           |
| [26956]ENERGY: 19150000 | 3260.0710   | 5293.3313  | 5214.9341   |           |

## Supplementary Text 6

|                         |             |            |             |           |
|-------------------------|-------------|------------|-------------|-----------|
| 351.9111                | -15917.6856 | -1745.0620 | 0.0000      | 0.0000    |
| 7760.6539               | 4218.1539   | 310.4650   | -3542.5000  | 4280.1955 |
| 311.6747                | -96.8709    | -81.1634   | 656151.2420 | -20.1828  |
| -20.1931                |             |            |             |           |
| [26992]ENERGY: 19160000 | 3263.1202   | 5140.0939  | 5219.9425   |           |
| 348.9760                | -15819.0764 | -1767.5388 | 0.0000      | 0.0000    |
| 7832.0037               | 4217.5212   | 313.3193   | -3614.4826  | 4279.8573 |
| 311.6586                | -145.7125   | -139.2259  | 656151.2420 | -18.2215  |
| -18.2050                |             |            |             |           |
| [27042]ENERGY: 19170000 | 3206.2302   | 5338.8910  | 5231.7267   |           |
| 327.4381                | -15893.3389 | -1730.8154 | 0.0000      | 0.0000    |
| 7734.5339               | 4214.6656   | 309.4200   | -3519.8683  | 4280.1657 |
| 311.5332                | 219.2379    | 173.0345   | 656151.2420 | -22.6252  |
| -22.6316                |             |            |             |           |
| [27078]ENERGY: 19180000 | 3214.0562   | 5241.5386  | 5218.8507   |           |
| 363.7949                | -15890.5050 | -1753.3207 | 0.0000      | 0.0000    |
| 7821.8980               | 4216.3128   | 312.9150   | -3605.5853  | 4280.3467 |
| 311.5400                | 55.0408     | 36.8110    | 656151.2420 | -25.9534  |
| -25.9462                |             |            |             |           |
| [27128]ENERGY: 19190000 | 3214.7398   | 5252.1349  | 5278.4612   |           |
| 332.2008                | -15918.7850 | -1778.1329 | 0.0000      | 0.0000    |
| 7835.8022               | 4216.4210   | 313.4713   | -3619.3813  | 4279.8358 |
| 311.8432                | 22.9951     | -107.8060  | 656151.2420 | -21.2626  |
| -21.2662                |             |            |             |           |
| [27167]ENERGY: 19200000 | 3201.2542   | 5199.9208  | 5309.9979   |           |
| 345.6076                | -15815.2956 | -1800.5979 | 0.0000      | 0.0000    |
| 7772.0574               | 4212.9443   | 310.9212   | -3559.1131  | 4280.3089 |
| 311.4727                | 38.4889     | 32.3253    | 656151.2420 | -23.2313  |
| -23.2398                |             |            |             |           |
| [27217]ENERGY: 19210000 | 3160.3832   | 5224.3222  | 5267.2114   |           |
| 351.6191                | -15803.4361 | -1791.0824 | 0.0000      | 0.0000    |
| 7810.8096               | 4219.8270   | 312.4714   | -3590.9826  | 4280.1784 |
| 311.4342                | 8.0982      | -18.7026   | 656151.2420 | -23.7788  |
| -23.7844                |             |            |             |           |
| [27253]ENERGY: 19220000 | 3229.5213   | 5210.4153  | 5234.2209   |           |
| 340.2770                | -15865.2603 | -1751.2078 | 0.0000      | 0.0000    |
| 7818.2702               | 4216.2366   | 312.7699   | -3602.0336  | 4279.3776 |
| 311.7809                | -63.5178    | -55.7835   | 656151.2420 | -21.5493  |
| -21.5386                |             |            |             |           |
| [27303]ENERGY: 19230000 | 3235.3855   | 5296.3837  | 5234.4577   |           |
| 350.1561                | -15816.8993 | -1841.1712 | 0.0000      | 0.0000    |
| 7760.1837               | 4218.4961   | 310.4461   | -3541.6876  | 4280.0794 |
| 311.7419                | 106.1315    | 50.0173    | 656151.2420 | -25.8421  |
| -25.8429                |             |            |             |           |
| [27339]ENERGY: 19240000 | 3287.3462   | 5208.6881  | 5210.2899   |           |
| 340.1385                | -15849.6056 | -1756.2016 | 0.0000      | 0.0000    |
| 7780.8555               | 4221.5109   | 311.2731   | -3559.3445  | 4281.0672 |
| 311.8698                | 36.3616     | -67.5661   | 656151.2420 | -24.1373  |
| -24.1446                |             |            |             |           |
| [27389]ENERGY: 19250000 | 3195.4484   | 5299.8418  | 5229.6295   |           |
| 313.0798                | -15796.0463 | -1764.5901 | 0.0000      | 0.0000    |
| 7739.3990               | 4216.7621   | 309.6147   | -3522.6369  | 4279.6537 |
| 311.8573                | 76.6070     | 32.7130    | 656151.2420 | -25.3421  |
| -25.3199                |             |            |             |           |

## Supplementary Text 6

|                         |             |            |             |           |
|-------------------------|-------------|------------|-------------|-----------|
| [27425]ENERGY: 19260000 | 3110.9221   | 5268.1949  | 5257.9015   |           |
| 350.1967                | -15769.2982 | -1794.5075 | 0.0000      | 0.0000    |
| 7789.7946               | 4213.2042   | 311.6307   | -3576.5904  | 4279.0996 |
| 311.6738                | 4.9748      | -58.9518   | 656151.2420 | -27.7709  |
| -27.7902                |             |            |             |           |
| [27475]ENERGY: 19270000 | 3133.5651   | 5307.2050  | 5229.1794   |           |
| 327.1923                | -15781.5229 | -1801.6092 | 0.0000      | 0.0000    |
| 7800.1605               | 4214.1701   | 312.0454   | -3585.9904  | 4279.6069 |
| 311.7744                | 42.3324     | 41.5807    | 656151.2420 | -23.2692  |
| -23.2642                |             |            |             |           |
| [27511]ENERGY: 19280000 | 3293.5029   | 5190.0008  | 5222.1453   |           |
| 353.8404                | -15915.9177 | -1732.5233 | 0.0000      | 0.0000    |
| 7809.8950               | 4220.9434   | 312.4348   | -3588.9516  | 4279.4989 |
| 311.7851                | 29.0233     | -110.5827  | 656151.2420 | -26.9406  |
| -26.9268                |             |            |             |           |
| [27561]ENERGY: 19290000 | 3257.6422   | 5181.5049  | 5243.2702   |           |
| 326.7295                | -15858.9905 | -1751.9547 | 0.0000      | 0.0000    |
| 7823.3081               | 4221.5097   | 312.9714   | -3601.7984  | 4280.0789 |
| 311.8250                | 7.6231      | -144.6620  | 656151.2420 | -26.6209  |
| -26.6416                |             |            |             |           |
| [27600]ENERGY: 19300000 | 3254.7353   | 5261.3226  | 5202.1242   |           |
| 340.7223                | -15884.2798 | -1703.9094 | 0.0000      | 0.0000    |
| 7748.6362               | 4219.3515   | 309.9842   | -3529.2847  | 4279.9490 |
| 311.9230                | 76.9126     | 111.0202   | 656151.2420 | -28.3111  |
| -28.3016                |             |            |             |           |
| [27650]ENERGY: 19310000 | 3279.5156   | 5144.9839  | 5243.6457   |           |
| 322.7341                | -15787.1510 | -1718.8032 | 0.0000      | 0.0000    |
| 7735.9308               | 4220.8560   | 309.4759   | -3515.0749  | 4281.7964 |
| 311.8664                | -59.6674    | -16.3214   | 656151.2420 | -25.1921  |
| -25.1773                |             |            |             |           |
| [27686]ENERGY: 19320000 | 3166.1788   | 5308.5373  | 5253.2590   |           |
| 346.9180                | -15851.3060 | -1785.2153 | 0.0000      | 0.0000    |
| 7778.5807               | 4216.9524   | 311.1821   | -3561.6283  | 4281.8275 |
| 311.5602                | -52.0830    | -92.5625   | 656151.2420 | -26.3212  |
| -26.3520                |             |            |             |           |
| [27736]ENERGY: 19330000 | 3238.7644   | 5220.1907  | 5244.5167   |           |
| 310.2946                | -15874.7775 | -1750.7196 | 0.0000      | 0.0000    |
| 7826.0206               | 4214.2899   | 313.0800   | -3611.7307  | 4280.7156 |
| 311.8109                | 69.7951     | 92.4710    | 656151.2420 | -27.0674  |
| -27.0618                |             |            |             |           |
| [27772]ENERGY: 19340000 | 3292.6222   | 5307.4435  | 5174.9287   |           |
| 360.8677                | -15816.9549 | -1790.4159 | 0.0000      | 0.0000    |
| 7693.6095               | 4222.1009   | 307.7828   | -3471.5086  | 4281.9829 |
| 311.9615                | -81.8465    | -25.4011   | 656151.2420 | -23.8456  |
| -23.8332                |             |            |             |           |
| [27822]ENERGY: 19350000 | 3194.2976   | 5266.7123  | 5210.6805   |           |
| 328.1151                | -15849.3788 | -1765.0545 | 0.0000      | 0.0000    |
| 7832.0480               | 4217.4201   | 313.3211   | -3614.6279  | 4281.1022 |
| 311.7458                | -32.9101    | -82.0927   | 656151.2420 | -27.8274  |
| -27.8225                |             |            |             |           |
| [27858]ENERGY: 19360000 | 3214.1766   | 5190.8648  | 5281.5670   |           |
| 346.3248                | -15831.7926 | -1754.0909 | 0.0000      | 0.0000    |
| 7773.8367               | 4220.8864   | 310.9923   | -3552.9503  | 4281.6349 |
| 311.8495                | 50.5319     | -9.0741    | 656151.2420 | -23.4606  |

Supplementary Text 6

-23.4804  
 [27908]ENERGY: 19370000      3188.3874      5311.2695      5265.6926  
 370.4713      -15883.7159      -1802.7619      0.0000      0.0000  
 7771.8060      4221.1489      310.9111      -3550.6571      4282.6785  
 311.8783      64.4285      -26.9987      656151.2420      -24.9406  
 -24.9239  
 [27944]ENERGY: 19380000      3145.6498      5225.3348      5256.2208  
 375.1961      -15825.1135      -1742.2023      0.0000      0.0000  
 7785.1515      4220.2371      311.4450      -3564.9144      4281.7579  
 311.5879      -51.3396      -23.2891      656151.2420      -24.3420  
 -24.3346  
 [27994]ENERGY: 19390000      3170.2477      5282.9546      5271.9495  
 324.3537      -15866.1767      -1796.5165      0.0000      0.0000  
 7832.7622      4219.5744      313.3496      -3613.1878      4283.6629  
 312.0267      197.5447      151.3329      656151.2420      -26.1080  
 -26.1142  
 [28033]ENERGY: 19400000      3222.6288      5189.1262      5247.5181  
 351.5285      -15811.1239      -1863.0367      0.0000      0.0000  
 7876.5687      4213.2096      315.1021      -3663.3591      4282.4601  
 311.8589      -41.5828      -20.0974      656151.2420      -28.5249  
 -28.5265  
 [28083]ENERGY: 19410000      3278.8128      5259.6941      5266.2396  
 342.0083      -15922.1196      -1803.4685      0.0000      0.0000  
 7797.7805      4218.9473      311.9502      -3578.8332      4283.1432  
 311.9706      -131.8596      -86.6573      656151.2420      -23.4964  
 -23.4978  
 [28119]ENERGY: 19420000      3233.1141      5158.4197      5244.3559  
 341.1492      -15843.5820      -1769.5482      0.0000      0.0000  
 7853.2916      4217.2003      314.1709      -3636.0913      4283.1023  
 311.6457      -246.8226      -251.3678      656151.2420      -24.7611  
 -24.7600  
 [28169]ENERGY: 19430000      3262.5316      5220.6243      5212.7341  
 348.4960      -15815.1533      -1748.1611      0.0000      0.0000  
 7737.5134      4218.5850      309.5392      -3518.9284      4282.8126  
 311.6688      90.9554      73.1617      656151.2420      -20.1331  
 -20.1278  
 [28205]ENERGY: 19440000      3257.9766      5157.4112      5308.3344  
 346.0990      -15873.5311      -1785.9883      0.0000      0.0000  
 7812.1009      4222.4026      312.5231      -3589.6983      4283.6851  
 311.8052      -90.6011      -140.2652      656151.2420      -21.0137  
 -21.0222  
 [28255]ENERGY: 19450000      3231.8418      5208.5398      5297.2972  
 328.2108      -15829.6030      -1811.3494      0.0000      0.0000  
 7795.6542      4220.5913      311.8651      -3575.0629      4283.7801  
 311.9222      9.9158      -54.2803      656151.2420      -15.2595  
 -15.2676  
 [28291]ENERGY: 19460000      3233.8918      5262.8480      5260.1037  
 333.2257      -15857.7148      -1828.8857      0.0000      0.0000  
 7814.1816      4217.6503      312.6063      -3596.5313      4283.8860  
 311.9551      45.1169      48.2532      656151.2420      -15.6025  
 -15.5847  
 [28341]ENERGY: 19470000      3265.9894      5216.2040      5274.1312  
 330.8982      -15798.5673      -1858.1606      0.0000      0.0000  
 7791.1429      4221.6378      311.6847      -3569.5050      4282.6061

## Supplementary Text 6

|                         |             |            |             |           |
|-------------------------|-------------|------------|-------------|-----------|
| 312.0912                | -3.8650     | -37.2810   | 656151.2420 | -16.1510  |
| -16.1582                |             |            |             |           |
| [28377]ENERGY: 19480000 | 3173.5528   | 5378.3296  | 5253.7648   |           |
| 311.6267                | -15894.9596 | -1729.1848 | 0.0000      | 0.0000    |
| 7727.6160               | 4220.7455   | 309.1433   | -3506.8705  | 4283.1954 |
| 312.2121                | 118.4221    | 72.5537    | 656151.2420 | -18.5347  |
| -18.5497                |             |            |             |           |
| [28427]ENERGY: 19490000 | 3215.9716   | 5256.3289  | 5280.9394   |           |
| 332.7349                | -15891.1555 | -1762.6164 | 0.0000      | 0.0000    |
| 7788.0143               | 4220.2171   | 311.5595   | -3567.7972  | 4283.7074 |
| 312.1972                | -26.3525    | 35.8979    | 656151.2420 | -17.6873  |
| -17.6640                |             |            |             |           |
| [28466]ENERGY: 19500000 | 3147.5495   | 5212.2463  | 5262.1458   |           |
| 336.6796                | -15779.4938 | -1832.6671 | 0.0000      | 0.0000    |
| 7872.9580               | 4219.4183   | 314.9577   | -3653.5397  | 4283.3057 |
| 312.1468                | -164.0291   | -143.3503  | 656151.2420 | -14.4446  |
| -14.4634                |             |            |             |           |
| [28516]ENERGY: 19510000 | 3165.2758   | 5195.0144  | 5269.6395   |           |
| 331.1165                | -15797.4071 | -1776.0307 | 0.0000      | 0.0000    |
| 7831.5236               | 4219.1319   | 313.3001   | -3612.3917  | 4284.4802 |
| 312.2430                | 261.2361    | 49.2591    | 656151.2420 | -13.9492  |
| -13.9627                |             |            |             |           |
| [28552]ENERGY: 19520000 | 3211.2565   | 5246.5674  | 5274.8613   |           |
| 345.1939                | -15831.3943 | -1767.5949 | 0.0000      | 0.0000    |
| 7743.5112               | 4222.4011   | 309.7792   | -3521.1101  | 4285.0824 |
| 312.2713                | 125.3531    | 163.0991   | 656151.2420 | -18.4889  |
| -18.4731                |             |            |             |           |
| [28602]ENERGY: 19530000 | 3267.8623   | 5305.1290  | 5206.2687   |           |
| 342.1396                | -15884.6804 | -1786.6180 | 0.0000      | 0.0000    |
| 7773.2708               | 4223.3720   | 310.9697   | -3549.8989  | 4285.0348 |
| 312.3409                | -38.7898    | -89.3084   | 656151.2420 | -15.4597  |
| -15.4632                |             |            |             |           |
| [28638]ENERGY: 19540000 | 3163.1558   | 5253.1806  | 5331.0115   |           |
| 331.7991                | -15865.6363 | -1781.0286 | 0.0000      | 0.0000    |
| 7790.0528               | 4222.5349   | 311.6411   | -3567.5179  | 4283.6576 |
| 312.2943                | 112.7261    | 76.0017    | 656151.2420 | -16.1693  |
| -16.1645                |             |            |             |           |
| [28688]ENERGY: 19550000 | 3233.4738   | 5315.5959  | 5307.0291   |           |
| 368.8957                | -15934.3409 | -1872.7115 | 0.0000      | 0.0000    |
| 7801.5023               | 4219.4444   | 312.0991   | -3582.0579  | 4283.7251 |
| 312.3808                | -214.8423   | -71.2398   | 656151.2420 | -14.9411  |
| -14.9277                |             |            |             |           |
| [28724]ENERGY: 19560000 | 3279.8392   | 5241.2549  | 5310.6243   |           |
| 332.5991                | -15841.5746 | -1830.6280 | 0.0000      | 0.0000    |
| 7728.3809               | 4220.4958   | 309.1739   | -3507.8850  | 4283.9591 |
| 312.3472                | -77.7328    | -126.2182  | 656151.2420 | -21.4768  |
| -21.4802                |             |            |             |           |
| [28774]ENERGY: 19570000 | 3171.2568   | 5280.3371  | 5315.7223   |           |
| 332.4800                | -15813.3829 | -1776.7804 | 0.0000      | 0.0000    |
| 7709.6227               | 4219.2555   | 308.4235   | -3490.3672  | 4284.7286 |
| 312.1665                | 34.9828     | 53.7508    | 656151.2420 | -11.7786  |
| -11.7737                |             |            |             |           |
| [28810]ENERGY: 19580000 | 3205.1312   | 5326.5313  | 5313.8146   |           |
| 348.7038                | -15942.3570 | -1779.6884 | 0.0000      | 0.0000    |

## Supplementary Text 6

|                         |             |            |             |           |
|-------------------------|-------------|------------|-------------|-----------|
| 7748.9025               | 4221.0379   | 309.9948   | -3527.8646  | 4285.6431 |
| 312.1774                | 129.4010    | 93.1829    | 656151.2420 | -16.0106  |
| -16.0232                |             |            |             |           |
| [28860]ENERGY: 19590000 | 3263.6903   | 5153.8980  | 5255.2410   |           |
| 324.4805                | -15836.9673 | -1749.8931 | 0.0000      | 0.0000    |
| 7812.5903               | 4223.0398   | 312.5427   | -3589.5505  | 4286.3877 |
| 312.3453                | 33.4558     | -80.1577   | 656151.2420 | -15.3820  |
| -15.3852                |             |            |             |           |
| [28899]ENERGY: 19600000 | 3274.5723   | 5329.1147  | 5268.7974   |           |
| 326.9829                | -15923.5613 | -1773.4543 | 0.0000      | 0.0000    |
| 7721.3465               | 4223.7981   | 308.8925   | -3497.5484  | 4285.1801 |
| 312.3370                | -90.9927    | -98.3212   | 656151.2420 | -15.1803  |
| -15.1876                |             |            |             |           |
| [28949]ENERGY: 19610000 | 3212.3778   | 5312.7599  | 5257.0592   |           |
| 340.4838                | -15909.8653 | -1787.4433 | 0.0000      | 0.0000    |
| 7797.5545               | 4222.9266   | 311.9412   | -3574.6279  | 4286.0698 |
| 312.2311                | 28.1252     | -0.4895    | 656151.2420 | -20.4566  |
| -20.4542                |             |            |             |           |
| [28985]ENERGY: 19620000 | 3151.0706   | 5279.9167  | 5261.5416   |           |
| 341.9950                | -15794.4827 | -1778.1427 | 0.0000      | 0.0000    |
| 7761.5000               | 4223.3984   | 310.4988   | -3538.1016  | 4285.7693 |
| 312.3371                | 76.0211     | 19.9925    | 656151.2420 | -14.4108  |
| -14.4237                |             |            |             |           |
| [29035]ENERGY: 19630000 | 3149.8316   | 5227.6012  | 5243.8892   |           |
| 342.7893                | -15865.6331 | -1712.3586 | 0.0000      | 0.0000    |
| 7835.8606               | 4221.9803   | 313.4736   | -3613.8804  | 4285.3833 |
| 312.3813                | 299.1514    | 156.0523   | 656151.2420 | -18.3031  |
| -18.2853                |             |            |             |           |
| [29071]ENERGY: 19640000 | 3217.2791   | 5244.4886  | 5286.2157   |           |
| 335.5956                | -15868.6486 | -1801.8323 | 0.0000      | 0.0000    |
| 7809.8995               | 4222.9976   | 312.4350   | -3586.9019  | 4287.0837 |
| 312.3036                | 72.8109     | -36.8190   | 656151.2420 | -16.9306  |
| -16.9331                |             |            |             |           |
| [29121]ENERGY: 19650000 | 3234.2109   | 5300.5627  | 5290.7583   |           |
| 333.7280                | -15995.5922 | -1797.9813 | 0.0000      | 0.0000    |
| 7859.8954               | 4225.5818   | 314.4351   | -3634.3136  | 4286.1802 |
| 312.3873                | 150.7687    | 92.6181    | 656151.2420 | -16.7155  |
| -16.7087                |             |            |             |           |
| [29157]ENERGY: 19660000 | 3239.7580   | 5236.9224  | 5227.4853   |           |
| 338.6991                | -15789.6905 | -1816.1046 | 0.0000      | 0.0000    |
| 7792.2671               | 4229.3369   | 311.7296   | -3562.9303  | 4288.5137 |
| 312.2653                | 83.5106     | -2.5234    | 656151.2420 | -20.5773  |
| -20.5879                |             |            |             |           |
| [29207]ENERGY: 19670000 | 3233.0365   | 5282.9742  | 5272.7878   |           |
| 352.2081                | -15930.1612 | -1728.3276 | 0.0000      | 0.0000    |
| 7740.1841               | 4222.7020   | 309.6461   | -3517.4822  | 4286.0767 |
| 312.2968                | -42.3307    | 30.5869    | 656151.2420 | -14.4765  |
| -14.4694                |             |            |             |           |
| [29243]ENERGY: 19680000 | 3242.4439   | 5331.4659  | 5271.8453   |           |
| 336.2076                | -15883.5479 | -1881.5227 | 0.0000      | 0.0000    |
| 7809.7995               | 4226.6916   | 312.4310   | -3583.1079  | 4287.3778 |
| 312.3286                | -172.0435   | -182.0212  | 656151.2420 | -23.5509  |
| -23.5451                |             |            |             |           |
| [29293]ENERGY: 19690000 | 3199.1256   | 5239.1129  | 5276.4070   |           |

## Supplementary Text 6

|                         |             |            |             |           |
|-------------------------|-------------|------------|-------------|-----------|
| 346.9068                | -15854.6631 | -1790.8501 | 0.0000      | 0.0000    |
| 7809.4564               | 4225.4955   | 312.4173   | -3583.9609  | 4287.0914 |
| 312.1707                | 0.8634      | 16.4612    | 656151.2420 | -18.4196  |
| -18.4145                |             |            |             |           |
| [29332]ENERGY: 19700000 | 3272.6397   | 5220.7889  | 5250.0633   |           |
| 341.8325                | -15852.6678 | -1798.5201 | 0.0000      | 0.0000    |
| 7793.3333               | 4227.4699   | 311.7723   | -3565.8635  | 4287.6164 |
| 312.1857                | -63.1285    | -23.8646   | 656151.2420 | -18.0461  |
| -18.0452                |             |            |             |           |
| [29382]ENERGY: 19710000 | 3238.0622   | 5215.1324  | 5240.7061   |           |
| 365.4446                | -15833.5828 | -1791.8731 | 0.0000      | 0.0000    |
| 7788.5801               | 4222.4696   | 311.5821   | -3566.1106  | 4287.1126 |
| 312.0902                | -171.8146   | -148.5688  | 656151.2420 | -18.9035  |
| -18.9100                |             |            |             |           |
| [29418]ENERGY: 19720000 | 3176.5707   | 5205.2084  | 5276.7190   |           |
| 330.3560                | -15857.6582 | -1769.1782 | 0.0000      | 0.0000    |
| 7859.4327               | 4221.4503   | 314.4166   | -3637.9824  | 4286.9593 |
| 312.2061                | 179.2933    | 85.4315    | 656151.2420 | -14.9486  |
| -14.9432                |             |            |             |           |
| [29468]ENERGY: 19730000 | 3320.2078   | 5294.1633  | 5239.8555   |           |
| 341.1001                | -15957.1686 | -1778.6794 | 0.0000      | 0.0000    |
| 7762.4952               | 4221.9739   | 310.5386   | -3540.5213  | 4287.5880 |
| 312.3880                | 38.7299     | 18.2027    | 656151.2420 | -22.4400  |
| -22.4365                |             |            |             |           |
| [29504]ENERGY: 19740000 | 3298.2102   | 5191.7687  | 5262.7229   |           |
| 339.1909                | -15922.9017 | -1747.8106 | 0.0000      | 0.0000    |
| 7805.9615               | 4227.1418   | 312.2775   | -3578.8197  | 4288.7121 |
| 312.4479                | -66.5527    | -62.9010   | 656151.2420 | -16.3663  |
| -16.3753                |             |            |             |           |
| [29554]ENERGY: 19750000 | 3294.1965   | 5207.8588  | 5267.3816   |           |
| 342.0765                | -15901.3012 | -1791.3487 | 0.0000      | 0.0000    |
| 7808.2253               | 4227.0889   | 312.3681   | -3581.1364  | 4288.8460 |
| 312.3633                | -42.3701    | -19.5549   | 656151.2420 | -19.8934  |
| -19.8862                |             |            |             |           |
| [29590]ENERGY: 19760000 | 3164.0854   | 5302.0396  | 5306.6861   |           |
| 350.1564                | -15926.9753 | -1793.9654 | 0.0000      | 0.0000    |
| 7821.9754               | 4224.0022   | 312.9181   | -3597.9732  | 4289.1143 |
| 312.4589                | -96.2725    | -51.2494   | 656151.2420 | -19.7763  |
| -19.7870                |             |            |             |           |
| [29640]ENERGY: 19770000 | 3127.8609   | 5283.3227  | 5229.2273   |           |
| 343.7230                | -15783.4232 | -1829.5162 | 0.0000      | 0.0000    |
| 7853.6735               | 4224.8680   | 314.1862   | -3628.8055  | 4289.6529 |
| 312.4064                | -26.7125    | -49.8428   | 656151.2420 | -16.0161  |
| -16.0146                |             |            |             |           |
| [29676]ENERGY: 19780000 | 3217.9017   | 5252.7956  | 5318.4678   |           |
| 342.7554                | -15822.0685 | -1776.7087 | 0.0000      | 0.0000    |
| 7694.6062               | 4227.7495   | 307.8227   | -3466.8566  | 4289.7817 |
| 312.6569                | -86.8294    | -62.8510   | 656151.2420 | -16.4725  |
| -16.4736                |             |            |             |           |
| [29726]ENERGY: 19790000 | 3231.7435   | 5188.4530  | 5287.2435   |           |
| 360.1132                | -15941.7351 | -1748.5361 | 0.0000      | 0.0000    |
| 7848.5947               | 4225.8768   | 313.9830   | -3622.7179  | 4289.2539 |
| 312.3594                | -111.4778   | -75.4965   | 656151.2420 | -18.9917  |
| -19.0032                |             |            |             |           |



## Supplementary Text 6

|                         |             |            |             |           |
|-------------------------|-------------|------------|-------------|-----------|
| [29765]ENERGY: 19800000 | 3197.6503   | 5273.3607  | 5259.8490   |           |
| 326.7265                | -15871.7482 | -1748.8457 | 0.0000      | 0.0000    |
| 7788.5320               | 4225.5245   | 311.5802   | -3563.0075  | 4288.8099 |
| 312.2376                | 137.6705    | 141.8958   | 656151.2420 | -17.8972  |
| -17.8887                |             |            |             |           |
| [29815]ENERGY: 19810000 | 3243.5788   | 5284.1572  | 5239.7033   |           |
| 365.4578                | -15906.7271 | -1767.9423 | 0.0000      | 0.0000    |
| 7767.2278               | 4225.4555   | 310.7279   | -3541.7723  | 4289.5215 |
| 312.2864                | 19.8975     | 20.3660    | 656151.2420 | -17.7940  |
| -17.7854                |             |            |             |           |
| [29851]ENERGY: 19820000 | 3228.0803   | 5318.0387  | 5285.8924   |           |
| 362.6870                | -15888.2941 | -1776.7611 | 0.0000      | 0.0000    |
| 7698.8486               | 4228.4919   | 307.9924   | -3470.3567  | 4289.7711 |
| 312.1692                | 9.3482      | -46.8143   | 656151.2420 | -20.7139  |
| -20.7187                |             |            |             |           |
| [29901]ENERGY: 19830000 | 3277.1478   | 5280.7334  | 5263.0033   |           |
| 347.8879                | -15892.0713 | -1871.8105 | 0.0000      | 0.0000    |
| 7817.8582               | 4222.7488   | 312.7534   | -3595.1094  | 4289.6599 |
| 312.3676                | -14.1479    | -52.5221   | 656151.2420 | -15.3749  |
| -15.3724                |             |            |             |           |
| [29937]ENERGY: 19840000 | 3188.4166   | 5280.9397  | 5293.6097   |           |
| 336.1471                | -15803.9833 | -1840.7675 | 0.0000      | 0.0000    |
| 7771.0666               | 4225.4288   | 310.8815   | -3545.6377  | 4290.5042 |
| 312.3119                | -1.9495     | -45.4848   | 656151.2420 | -18.8935  |
| -18.9103                |             |            |             |           |
| [29987]ENERGY: 19850000 | 3219.1801   | 5355.9837  | 5288.0857   |           |
| 353.6447                | -15915.8616 | -1819.8323 | 0.0000      | 0.0000    |
| 7746.8684               | 4228.0688   | 309.9135   | -3518.7996  | 4288.7824 |
| 312.5257                | 22.5320     | -26.8351   | 656151.2420 | -17.4288  |
| -17.4056                |             |            |             |           |
| [30023]ENERGY: 19860000 | 3233.3057   | 5313.7255  | 5264.6940   |           |
| 338.3155                | -15889.3958 | -1767.2131 | 0.0000      | 0.0000    |
| 7735.9743               | 4229.4061   | 309.4776   | -3506.5682  | 4287.6003 |
| 312.4948                | 132.3026    | 191.4573   | 656151.2420 | -20.5992  |
| -20.5973                |             |            |             |           |
| [30073]ENERGY: 19870000 | 3220.3135   | 5189.2123  | 5310.7647   |           |
| 332.6122                | -15904.8733 | -1666.3065 | 0.0000      | 0.0000    |
| 7746.6298               | 4228.3528   | 309.9039   | -3518.2770  | 4288.6067 |
| 312.2832                | 200.7948    | 156.8744   | 656151.2420 | -16.0546  |
| -16.0541                |             |            |             |           |
| [30109]ENERGY: 19880000 | 3221.9377   | 5252.8985  | 5299.3492   |           |
| 351.5108                | -15904.2515 | -1760.0848 | 0.0000      | 0.0000    |
| 7765.1868               | 4226.5466   | 310.6463   | -3538.6402  | 4288.2095 |
| 312.2430                | 152.7555    | -64.5070   | 656151.2420 | -18.9011  |
| -18.9383                |             |            |             |           |
| [30159]ENERGY: 19890000 | 3233.9653   | 5216.5914  | 5257.0063   |           |
| 352.7545                | -15786.2598 | -1780.8260 | 0.0000      | 0.0000    |
| 7734.6613               | 4227.8931   | 309.4251   | -3506.7683  | 4288.6749 |
| 312.3463                | 50.8713     | 78.1651    | 656151.2420 | -17.8112  |
| -17.7650                |             |            |             |           |
| [30198]ENERGY: 19900000 | 3232.9015   | 5276.0677  | 5229.5685   |           |
| 333.6224                | -15879.3839 | -1765.3645 | 0.0000      | 0.0000    |
| 7800.9828               | 4228.3946   | 312.0783   | -3572.5883  | 4288.6470 |
| 312.4223                | 56.5940     | 47.9220    | 656151.2420 | -15.1066  |

Supplementary Text 6

-15.1284  
 [30248]ENERGY: 19910000      3238.0490      5285.2707      5229.1813  
 354.0407      -15919.5231      -1819.9813      0.0000      0.0000  
 7858.0730      4225.1104      314.3622      -3632.9627      4289.2293  
 312.3712      28.7156      -66.5686      656151.2420      -21.3035  
 -21.3067  
 [30284]ENERGY: 19920000      3165.1953      5234.6274      5296.1968  
 357.9667      -15864.6222      -1801.5468      0.0000      0.0000  
 7836.2688      4224.0860      313.4899      -3612.1828      4288.8531  
 312.4620      -64.3921      -73.2207      656151.2420      -12.4777  
 -12.4676  
 [30334]ENERGY: 19930000      3281.8117      5245.7775      5252.0760  
 358.8082      -15915.2632      -1807.6774      0.0000      0.0000  
 7814.6334      4230.1661      312.6244      -3584.4673      4290.7430  
 312.3421      126.7584      44.3698      656151.2420      -17.4089  
 -17.4152  
 [30370]ENERGY: 19940000      3224.4660      5203.4118      5250.0100  
 334.0202      -15824.7266      -1726.1572      0.0000      0.0000  
 7766.8956      4227.9197      310.7147      -3538.9758      4288.9067  
 312.4898      100.1055      95.7456      656151.2420      -12.0720  
 -12.0621  
 [30420]ENERGY: 19950000      3249.4184      5209.2065      5248.6792  
 354.7241      -15852.3370      -1809.6506      0.0000      0.0000  
 7827.4767      4227.5172      313.1382      -3599.9595      4290.5575  
 312.4134      -43.4568      -67.5047      656151.2420      -13.8916  
 -13.8994  
 [30456]ENERGY: 19960000      3163.6552      5264.9813      5250.1333  
 316.6500      -15797.5973      -1778.6156      0.0000      0.0000  
 7806.6432      4225.8502      312.3048      -3580.7930      4290.3958  
 312.5051      -102.5682      -133.8402      656151.2420      -14.3776  
 -14.3907  
 [30506]ENERGY: 19970000      3193.8147      5235.0979      5266.5453  
 350.8349      -15896.7484      -1729.0964      0.0000      0.0000  
 7807.2148      4227.6628      312.3276      -3579.5520      4290.6163  
 312.5562      191.1727      85.5751      656151.2420      -17.1206  
 -17.1240  
 [30542]ENERGY: 19980000      3267.4370      5213.8100      5323.3868  
 335.0350      -15981.6173      -1741.3324      0.0000      0.0000  
 7811.5083      4228.2275      312.4994      -3583.2808      4290.6674  
 312.3913      1.8106      0.3797      656151.2420      -13.4739  
 -13.4564  
 [30592]ENERGY: 19990000      3244.5913      5197.9735      5274.2000  
 332.2703      -15888.4338      -1768.8485      0.0000      0.0000  
 7836.1142      4227.8672      313.4837      -3608.2471      4290.9975  
 312.3670      -0.1967      -57.7561      656151.2420      -12.2882  
 -12.2988  
 [30631]ENERGY: 20000000      3240.3107      5209.5283      5248.1129  
 332.7802      -15858.3173      -1741.5292      0.0000      0.0000  
 7798.1638      4229.0494      311.9655      -3569.1144      4291.8761  
 312.3900      -15.7796      -41.2510      656151.2420      -15.5698  
 -15.5580

40.1ns Q9ZSP9 SIMULATION DATA

## Supplementary Text 6

|              | TS          | BOND       | ANGLE       | DIHED      | IMPRP     |
|--------------|-------------|------------|-------------|------------|-----------|
|              | ELECT       | VDW        | BOUNDARY    | MISC       | KINETIC   |
|              | TOTAL       | TEMP       | POTENTIAL   | TOTAL3     | TEMPAVG   |
|              | PRESSURE    | GPRESSURE  | VOLUME      | PRESSAVG   | GPRESSAVG |
| [191]ENERGY: | 0           | 5073.0363  | 5427.9798   | 5983.4735  | 309.4550  |
|              | -9980.3682  | -1816.1227 | 0.0000      | 0.0000     | 7946.2271 |
|              | 12943.6807  | 296.3993   | 4997.4536   | 13055.9770 | 296.3993  |
|              | 2833.7005   | 382.3025   | 723302.9074 | 2833.7005  | 382.3025  |
| [279]ENERGY: | 10000       | 3342.0155  | 5587.7607   | 5892.8456  | 317.6694  |
|              | -14480.9974 | -1705.4155 | 0.0000      | 0.0000     | 8076.4840 |
|              | 7030.3623   | 301.2580   | -1046.1217  | 7096.5297  | 321.6125  |
|              | 43.7578     | 40.2904    | 664265.7895 | 0.4459     | 0.5699    |
| [235]ENERGY: | 20000       | 3418.9013  | 5580.8599   | 5842.2846  | 352.7421  |
|              | -14424.5274 | -1764.7867 | 0.0000      | 0.0000     | 8027.2712 |
|              | 7032.7449   | 299.4556   | -994.5263   | 7092.9904  | 303.3488  |
|              | -20.5344    | -51.7714   | 664265.7895 | -16.5787   | -16.5267  |
| [275]ENERGY: | 30000       | 3382.5313  | 5566.4984   | 5965.5370  | 343.0036  |
|              | -14656.2553 | -1775.4386 | 0.0000      | 0.0000     | 8203.1826 |
|              | 7029.0590   | 306.0180   | -1174.1236  | 7092.7689  | 305.2949  |
|              | 90.4211     | 106.5638   | 664265.7895 | 1.0384     | 1.0323    |
| [327]ENERGY: | 40000       | 3472.1499  | 5600.3683   | 5934.7610  | 333.3618  |
|              | -14749.3830 | -1839.6015 | 0.0000      | 0.0000     | 8275.5335 |
|              | 7027.1901   | 308.7170   | -1248.3434  | 7093.3753  | 307.6098  |
|              | -124.3150   | -180.6324  | 664265.7895 | -0.0262    | -0.0386   |
| [365]ENERGY: | 50000       | 3462.3405  | 5503.0111   | 5959.5111  | 333.4270  |
|              | -14737.1868 | -1732.6371 | 0.0000      | 0.0000     | 8243.1006 |
|              | 7031.5665   | 307.5071   | -1211.5341  | 7093.5946  | 308.5614  |
|              | 105.6737    | 46.6620    | 664265.7895 | -0.3793    | -0.3797   |
| [417]ENERGY: | 60000       | 3453.9569  | 5521.6268   | 5958.9751  | 353.2740  |
|              | -14768.3274 | -1772.5940 | 0.0000      | 0.0000     | 8283.2603 |
|              | 7030.1718   | 309.0052   | -1253.0885  | 7094.0431  | 309.4929  |
|              | -117.9982   | -36.7381   | 664265.7895 | -0.0619    | -0.0524   |
| [455]ENERGY: | 70000       | 3398.4719  | 5643.5556   | 5983.7572  | 366.4920  |
|              | -14774.1420 | -1841.1488 | 0.0000      | 0.0000     | 8252.5886 |
|              | 7029.5744   | 307.8610   | -1223.0142  | 7093.6368  | 309.8919  |
|              | 9.9800      | -40.3286   | 664265.7895 | 1.1050     | 1.1160    |
| [506]ENERGY: | 80000       | 3425.9042  | 5656.4920   | 5944.0189  | 369.4807  |
|              | -14892.8200 | -1831.1339 | 0.0000      | 0.0000     | 8355.0148 |
|              | 7026.9568   | 311.6820   | -1328.0580  | 7093.6973  | 310.1831  |
|              | -214.7604   | -156.5696  | 664265.7895 | -0.1272    | -0.1416   |
| [543]ENERGY: | 90000       | 3458.3705  | 5559.6670   | 5912.0512  | 355.6389  |
|              | -14883.2247 | -1676.0441 | 0.0000      | 0.0000     | 8301.5055 |
|              | 7027.9642   | 309.6859   | -1273.5413  | 7092.7699  | 310.5325  |
|              | 124.9259    | 82.1909    | 664265.7895 | -0.3062    | -0.2982   |
| [596]ENERGY: | 100000      | 3498.9873  | 5536.9068   | 5984.7780  | 346.9289  |
|              | -14778.1562 | -1869.2356 | 0.0000      | 0.0000     | 8308.9444 |
|              | 7029.1536   | 309.9634   | -1279.7908  | 7095.0474  | 311.3199  |
|              | -0.8254     | -64.5480   | 664265.7895 | 0.5862     | 0.5672    |
| [633]ENERGY: | 110000      | 3354.5402  | 5580.0216   | 6010.4190  | 339.9427  |
|              | -14856.3055 | -1770.8349 | 0.0000      | 0.0000     | 8368.5542 |
|              | 7026.3373   | 312.1871   | -1342.2169  | 7094.1564  | 311.4881  |
|              | 148.5714    | 61.7723    | 664265.7895 | -0.6868    | -0.6864   |
| [684]ENERGY: | 120000      | 3362.2428  | 5540.6680   | 5955.2676  | 362.7671  |
|              | -14711.5950 | -1844.6917 | 0.0000      | 0.0000     | 8364.1928 |

## Supplementary Text 6

|               |             |             |             |             |           |
|---------------|-------------|-------------|-------------|-------------|-----------|
|               | 7028.8516   | 312.0244    | -1335.3412  | 7094.2070   | 311.6584  |
|               | 133.4142    | 74.0909     | 664265.7895 | -1.4073     | -1.3979   |
| [720]ENERGY:  | 130000      | 3378.5010   | 5674.1238   | 5923.9499   | 354.4580  |
|               | -14826.1319 | -1791.4470  | 0.0000      | 0.0000      | 8311.8927 |
|               | 7025.3464   | 310.0734    | -1286.5463  | 7094.7611   | 312.0327  |
|               | -47.7801    | -31.4960    | 664265.7895 | 1.1020      | 1.1170    |
| [770]ENERGY:  | 140000      | 3418.7666   | 5585.6806   | 5917.0779   | 349.1934  |
|               | -14786.4274 | -1773.4511  | 0.0000      | 0.0000      | 8317.4428 |
|               | 7028.2828   | 310.2804    | -1289.1599  | 7093.2355   | 312.2614  |
|               | 154.8482    | 21.1624     | 664265.7895 | 0.5689      | 0.5536    |
| [806]ENERGY:  | 150000      | 3453.5642   | 5657.1076   | 5945.6558   | 347.7770  |
|               | -14931.2233 | -1800.4422  | 0.0000      | 0.0000      | 8353.4800 |
|               | 7025.9191   | 311.6248    | -1327.5609  | 7093.0133   | 312.4295  |
|               | -19.6620    | 39.7204     | 664265.7895 | -1.6620     | -1.6466   |
| [856]ENERGY:  | 160000      | 3356.3727   | 5593.5944   | 5904.1684   | 367.9491  |
|               | -14866.0838 | -1748.1921  | 0.0000      | 0.0000      | 8417.5876 |
|               | 7025.3962   | 314.0163    | -1392.1914  | 7093.1953   | 312.2536  |
|               | 134.9477    | 177.1515    | 664265.7895 | 0.8241      | 0.8182    |
| [892]ENERGY:  | 170000      | 3423.0840   | 5593.6260   | 5940.7059   | 353.2931  |
|               | -14955.9119 | -1730.3597  | 0.0000      | 0.0000      | 8399.5915 |
|               | 7024.0288   | 313.3450    | -1375.5626  | 7092.3347   | 312.4072  |
|               | -6.3173     | 35.6338     | 664265.7895 | 0.7369      | 0.7547    |
| [942]ENERGY:  | 180000      | 3479.3787   | 5627.0509   | 5922.4013   | 360.6234  |
|               | -14990.8356 | -1766.4699  | 0.0000      | 0.0000      | 8388.1563 |
|               | 7020.3050   | 312.9184    | -1367.8512  | 7091.6054   | 312.4546  |
|               | -85.0531    | -111.7388   | 664265.7895 | 0.7807      | 0.7800    |
| [978]ENERGY:  | 190000      | 3451.5107   | 5626.9474   | 5905.8200   | 330.9721  |
|               | -14809.1390 | -1784.3500  | 0.0000      | 0.0000      | 8308.4136 |
|               | 7030.1749   | 309.9436    | -1278.2387  | 7093.2817   | 312.6460  |
|               | 184.2557    | 68.2342     | 664265.7895 | 0.1553      | 0.1282    |
| [1031]ENERGY: | 200000      | 3454.5656   | 5625.4577   | 5912.9153   |           |
|               | 347.2812    | -14931.4533 | -1781.5473  | 0.0000      | 0.0000    |
|               | 8396.0307   | 7023.2499   | 313.2121    | -1372.7808  | 7092.9323 |
|               | 312.4531    | -133.4435   | -50.0877    | 664265.7895 | -2.7826   |
|               | -2.7618     |             |             |             |           |
| [1067]ENERGY: | 210000      | 3417.4345   | 5622.5866   | 5911.9118   |           |
|               | 339.3518    | -14846.5477 | -1804.9872  | 0.0000      | 0.0000    |
|               | 8387.8253   | 7027.5752   | 312.9060    | -1360.2501  | 7094.4733 |
|               | 312.6080    | 150.5638    | 52.8787     | 664265.7895 | 2.4164    |
|               | 2.4103      |             |             |             |           |
| [1117]ENERGY: | 220000      | 3442.2155   | 5644.7992   | 5952.5391   |           |
|               | 363.6215    | -14899.7258 | -1771.2540  | 0.0000      | 0.0000    |
|               | 8295.3299   | 7027.5253   | 309.4555    | -1267.8046  | 7092.8979 |
|               | 312.7279    | -24.0479    | -17.5427    | 664265.7895 | -1.0636   |
|               | -1.0676     |             |             |             |           |
| [1153]ENERGY: | 230000      | 3478.2782   | 5589.3416   | 5948.4686   |           |
|               | 363.0481    | -15000.9260 | -1761.3792  | 0.0000      | 0.0000    |
|               | 8408.6824   | 7025.5137   | 313.6841    | -1383.1687  | 7094.0783 |
|               | 312.8479    | 159.4751    | 66.6615     | 664265.7895 | 2.0973    |
|               | 2.0837      |             |             |             |           |
| [1203]ENERGY: | 240000      | 3396.6622   | 5663.4599   | 5870.4773   |           |
|               | 374.2320    | -14957.4475 | -1671.9988  | 0.0000      | 0.0000    |
|               | 8350.0189   | 7025.4041   | 311.4957    | -1324.6148  | 7092.7515 |
|               | 312.7832    | 17.5592     | 7.1169      | 664265.7895 | -0.2247   |

Supplementary Text 6

-0.2100  
 [1239]ENERGY: 250000 3477.3138 5467.6613 5959.4749  
 373.8198 -14899.7554 -1805.8269 0.0000 0.0000  
 8449.2018 7021.8893 315.1957 -1427.3125 7092.5918  
 312.6537 -130.7939 -174.6160 664265.7895 -2.5012  
 -2.5049  
 [1289]ENERGY: 260000 3415.0112 5673.4153 5928.1314  
 350.0087 -14995.8932 -1694.1107 0.0000 0.0000  
 8346.2748 7022.8374 311.3560 -1323.4373 7092.3157  
 312.8114 35.2435 80.2719 664265.7895 3.4384  
 3.4426  
 [1325]ENERGY: 270000 3413.9162 5598.4195 5950.8047  
 352.5311 -14952.3604 -1750.6401 0.0000 0.0000  
 8415.5757 7028.2468 313.9412 -1387.3290 7093.4714  
 313.1717 -1.8647 99.3010 664265.7895 -0.6749  
 -0.6687  
 [1375]ENERGY: 280000 3416.5381 5631.0102 5999.6039  
 352.0292 -14970.0983 -1785.2447 0.0000 0.0000  
 8382.4988 7026.3373 312.7073 -1356.1615 7093.1153  
 313.3336 -34.1182 -88.7563 664265.7895 1.5623  
 1.5427  
 [1411]ENERGY: 290000 3404.5179 5580.8342 5921.6985  
 367.9392 -14996.1412 -1731.2741 0.0000 0.0000  
 8477.6536 7025.2280 316.2570 -1452.4256 7093.6795  
 313.2834 -29.6551 -19.8791 664265.7895 -3.0673  
 -3.0530  
 [1464]ENERGY: 300000 3525.0202 5638.2335 5923.6474  
 329.4026 -14937.0556 -1829.2907 0.0000 0.0000  
 8375.0880 7025.0453 312.4309 -1350.0427 7093.6043  
 313.4812 -162.6649 -232.9050 664265.7895 -0.2224  
 -0.2412  
 [1500]ENERGY: 310000 3515.3765 5635.5826 5873.6993  
 354.1562 -14974.8726 -1813.3861 0.0000 0.0000  
 8433.8424 7024.3983 314.6227 -1409.4441 7093.4288  
 313.5080 55.2201 116.9883 664265.7895 0.8410  
 0.8491  
 [1550]ENERGY: 320000 3495.8964 5644.1755 5917.4150  
 346.5828 -14955.4561 -1779.1726 0.0000 0.0000  
 8357.0568 7026.4978 311.7582 -1330.5591 7094.6134  
 313.6912 -21.6245 -39.0512 664265.7895 -0.1438  
 -0.1366  
 [1586]ENERGY: 330000 3509.8707 5704.1406 5879.2907  
 372.3326 -15135.9314 -1698.5280 0.0000 0.0000  
 8396.1721 7027.3472 313.2174 -1368.8249 7094.9145  
 313.9618 99.1836 63.6825 664265.7895 0.3853  
 0.3890  
 [1636]ENERGY: 340000 3429.4163 5593.7688 5912.8179  
 374.3610 -14962.7986 -1786.8183 0.0000 0.0000  
 8465.9375 7026.6846 315.8200 -1439.2529 7095.4181  
 314.1327 30.9340 -40.2014 664265.7895 -0.2713  
 -0.2946  
 [1672]ENERGY: 350000 3458.1400 5656.1178 5972.9692  
 340.3582 -15008.7841 -1791.6956 0.0000 0.0000  
 8403.3654 7030.4709 313.4857 -1372.8945 7094.4157

## Supplementary Text 6

|               |             |            |             |           |
|---------------|-------------|------------|-------------|-----------|
| 314.3730      | 142.0180    | 77.8973    | 664265.7895 | -0.3699   |
| -0.3674       |             |            |             |           |
| [1722]ENERGY: | 360000      | 3385.6095  | 5663.2529   | 5919.4145 |
| 340.3764      | -14972.3407 | -1767.4069 | 0.0000      | 0.0000    |
| 8458.1830     | 7027.0888   | 315.5307   | -1431.0942  | 7094.4813 |
| 314.2972      | 149.2979    | 120.3622   | 664265.7895 | 0.1659    |
| 0.1898        |             |            |             |           |
| [1758]ENERGY: | 370000      | 3490.4504  | 5686.4463   | 5972.1755 |
| 365.3797      | -15124.1112 | -1736.4893 | 0.0000      | 0.0000    |
| 8377.7173     | 7031.5687   | 312.5289   | -1346.1486  | 7095.8687 |
| 314.1990      | 11.2771     | -15.4018   | 664265.7895 | 0.5514    |
| 0.5404        |             |            |             |           |
| [1808]ENERGY: | 380000      | 3434.8474  | 5732.4348   | 5919.4548 |
| 348.9513      | -15155.7993 | -1727.0716 | 0.0000      | 0.0000    |
| 8470.8384     | 7023.6559   | 316.0028   | -1447.1825  | 7094.3868 |
| 314.3058      | 45.9010     | 87.8050    | 664265.7895 | -0.8854   |
| -0.8831       |             |            |             |           |
| [1844]ENERGY: | 390000      | 3428.1535  | 5693.6210   | 5902.7471 |
| 371.7121      | -15139.8955 | -1732.2227 | 0.0000      | 0.0000    |
| 8500.6012     | 7024.7168   | 317.1131   | -1475.8844  | 7095.1500 |
| 314.4479      | -122.0283   | -126.3984  | 664265.7895 | 1.7559    |
| 1.7708        |             |            |             |           |
| [1897]ENERGY: | 400000      | 3479.2372  | 5574.1573   | 5861.8107 |
| 366.3262      | -14952.7250 | -1719.7782 | 0.0000      | 0.0000    |
| 8424.4422     | 7033.4703   | 314.2720   | -1390.9718  | 7096.8301 |
| 314.2233      | 3.7254      | 10.1544    | 664265.7895 | -0.4491   |
| -0.4572       |             |            |             |           |
| [1933]ENERGY: | 410000      | 3384.5830  | 5677.8802   | 5928.2009 |
| 368.1859      | -15000.1269 | -1713.6697 | 0.0000      | 0.0000    |
| 8386.9323     | 7031.9856   | 312.8727   | -1354.9466  | 7096.6445 |
| 314.2037      | 122.2791    | 36.7316    | 664265.7895 | -1.8312   |
| -1.8296       |             |            |             |           |
| [1983]ENERGY: | 420000      | 3467.4521  | 5621.9570   | 5925.9536 |
| 356.2904      | -15019.3828 | -1752.0229 | 0.0000      | 0.0000    |
| 8427.8364     | 7028.0837   | 314.3986   | -1399.7527  | 7095.9638 |
| 314.5345      | 133.5841    | 31.1702    | 664265.7895 | 1.0517    |
| 1.0284        |             |            |             |           |
| [2019]ENERGY: | 430000      | 3490.4044  | 5687.6761   | 5902.4849 |
| 337.6334      | -15120.2324 | -1772.9044 | 0.0000      | 0.0000    |
| 8501.2590     | 7026.3211   | 317.1376   | -1474.9380  | 7096.0183 |
| 314.7168      | 51.7702     | 41.3323    | 664265.7895 | -0.1746   |
| -0.1587       |             |            |             |           |
| [2069]ENERGY: | 440000      | 3458.6501  | 5621.9201   | 5888.5541 |
| 359.4718      | -14906.5982 | -1791.7014 | 0.0000      | 0.0000    |
| 8398.6210     | 7028.9175   | 313.3087   | -1369.7035  | 7096.8992 |
| 314.7156      | 9.5139      | 44.0388    | 664265.7895 | 1.3889    |
| 1.3898        |             |            |             |           |
| [2105]ENERGY: | 450000      | 3504.6352  | 5606.2943   | 5911.1319 |
| 339.7664      | -15030.2437 | -1742.8733 | 0.0000      | 0.0000    |
| 8438.9375     | 7027.6483   | 314.8127   | -1411.2892  | 7096.6519 |
| 314.5703      | -40.6374    | -15.2886   | 664265.7895 | -1.2900   |
| -1.2799       |             |            |             |           |
| [2155]ENERGY: | 460000      | 3504.2789  | 5603.9684   | 5870.1601 |
| 355.7414      | -14937.3076 | -1796.7311 | 0.0000      | 0.0000    |

Supplementary Text 6

|               |             |            |             |           |
|---------------|-------------|------------|-------------|-----------|
| 8428.6502     | 7028.7604   | 314.4290   | -1399.8898  | 7097.5014 |
| 314.6200      | 83.7596     | 33.5908    | 664265.7895 | -0.4930   |
| -0.5105       |             |            |             |           |
| [2191]ENERGY: | 470000      | 3465.2708  | 5495.8180   | 5921.1250 |
| 354.3204      | -14891.9588 | -1760.1125 | 0.0000      | 0.0000    |
| 8444.0816     | 7028.5445   | 315.0046   | -1415.5370  | 7096.5948 |
| 314.6419      | -3.7176     | -25.6913   | 664265.7895 | -0.2606   |
| -0.2661       |             |            |             |           |
| [2241]ENERGY: | 480000      | 3424.1069  | 5661.1575   | 5921.9167 |
| 345.6306      | -15043.5106 | -1785.6422 | 0.0000      | 0.0000    |
| 8505.7173     | 7029.3762   | 317.3040   | -1476.3411  | 7098.1577 |
| 314.7609      | 101.8586    | 75.9857    | 664265.7895 | 1.6593    |
| 1.6707        |             |            |             |           |
| [2277]ENERGY: | 490000      | 3444.5570  | 5578.8679   | 5900.4965 |
| 350.4550      | -14941.0392 | -1843.1926 | 0.0000      | 0.0000    |
| 8533.3858     | 7023.5303   | 318.3361   | -1509.8555  | 7096.6064 |
| 314.8496      | -145.3379   | -107.8231  | 664265.7895 | -1.2928   |
| -1.2782       |             |            |             |           |
| [2330]ENERGY: | 500000      | 3487.2389  | 5667.3582   | 5858.0840 |
| 357.7218      | -15045.1850 | -1749.1863 | 0.0000      | 0.0000    |
| 8453.3109     | 7029.3426   | 315.3489   | -1423.9683  | 7097.5420 |
| 315.0739      | 119.5225    | 46.5591    | 664265.7895 | -0.0877   |
| -0.0914       |             |            |             |           |
| [2366]ENERGY: | 510000      | 3476.0016  | 5697.6239   | 5905.7599 |
| 349.1858      | -15050.6183 | -1827.8371 | 0.0000      | 0.0000    |
| 8477.4749     | 7027.5907   | 316.2504   | -1449.8842  | 7097.4391 |
| 315.5300      | -35.4453    | 48.6519    | 664265.7895 | 0.4028    |
| 0.3862        |             |            |             |           |
| [2416]ENERGY: | 520000      | 3507.8379  | 5667.1834   | 5880.6571 |
| 366.0487      | -15053.6747 | -1833.1861 | 0.0000      | 0.0000    |
| 8495.0894     | 7029.9557   | 316.9075   | -1465.1337  | 7096.1354 |
| 315.6829      | -83.8960    | -55.0878   | 664265.7895 | -1.1281   |
| -1.1117       |             |            |             |           |
| [2452]ENERGY: | 530000      | 3488.1047  | 5646.7752   | 5890.9418 |
| 343.7699      | -15150.4333 | -1725.9326 | 0.0000      | 0.0000    |
| 8534.5927     | 7027.8183   | 318.3811   | -1506.7743  | 7097.9110 |
| 315.5950      | 63.1087     | 127.0445   | 664265.7895 | -0.0939   |
| -0.1146       |             |            |             |           |
| [2502]ENERGY: | 540000      | 3530.9746  | 5712.4240   | 5870.7602 |
| 331.5287      | -15046.5461 | -1838.4459 | 0.0000      | 0.0000    |
| 8467.1340     | 7027.8294   | 315.8646   | -1439.3046  | 7098.2868 |
| 315.3944      | -102.5668   | -63.4853   | 664265.7895 | 0.5915    |
| 0.6029        |             |            |             |           |
| [2538]ENERGY: | 550000      | 3519.5807  | 5581.3255   | 5915.8518 |
| 344.0924      | -15071.9012 | -1821.4751 | 0.0000      | 0.0000    |
| 8558.4895     | 7025.9637   | 319.2726   | -1532.5258  | 7098.9491 |
| 315.7802      | -10.5139    | -31.7730   | 664265.7895 | 1.6705    |
| 1.6761        |             |            |             |           |
| [2588]ENERGY: | 560000      | 3559.0511  | 5610.9117   | 5915.7312 |
| 345.8857      | -14930.0688 | -1825.2098 | 0.0000      | 0.0000    |
| 8353.8274     | 7030.1285   | 311.6377   | -1323.6989  | 7099.0122 |
| 315.6052      | 7.8680      | -51.4340   | 664265.7895 | -0.9586   |
| -0.9595       |             |            |             |           |
| [2624]ENERGY: | 570000      | 3549.5997  | 5613.3541   | 5849.5486 |

Supplementary Text 6

|               |             |            |             |           |
|---------------|-------------|------------|-------------|-----------|
| 377.5072      | -15055.0877 | -1792.1509 | 0.0000      | 0.0000    |
| 8488.0187     | 7030.7896   | 316.6437   | -1457.2291  | 7098.4799 |
| 315.6000      | -46.5827    | -9.5565    | 664265.7895 | -1.0327   |
| -1.0465       |             |            |             |           |
| [2674]ENERGY: | 580000      | 3497.3842  | 5660.5698   | 5938.8816 |
| 358.7590      | -15130.2138 | -1684.1869 | 0.0000      | 0.0000    |
| 8389.9064     | 7031.1003   | 312.9837   | -1358.8061  | 7098.5577 |
| 315.7796      | 26.6157     | 37.4878    | 664265.7895 | 1.1548    |
| 1.1733        |             |            |             |           |
| [2710]ENERGY: | 590000      | 3438.1716  | 5694.2998   | 5857.1450 |
| 336.8451      | -15010.4626 | -1794.0046 | 0.0000      | 0.0000    |
| 8506.6402     | 7028.6345   | 317.3384   | -1478.0057  | 7099.3781 |
| 315.7765      | -5.0254     | -92.1295   | 664265.7895 | -0.4974   |
| -0.5086       |             |            |             |           |
| [2763]ENERGY: | 600000      | 3526.6934  | 5722.3610   | 5864.9842 |
| 349.5862      | -15185.4442 | -1747.2604 | 0.0000      | 0.0000    |
| 8498.2847     | 7029.2049   | 317.0267   | -1469.0798  | 7100.1043 |
| 315.6800      | -71.1317    | 16.6351    | 664265.7895 | 0.7726    |
| 0.7780        |             |            |             |           |
| [2799]ENERGY: | 610000      | 3502.8917  | 5668.8584   | 5829.6393 |
| 336.9871      | -15097.4033 | -1606.8863 | 0.0000      | 0.0000    |
| 8400.7419     | 7034.8288   | 313.3879   | -1365.9131  | 7099.9107 |
| 315.6279      | 61.9704     | 55.8452    | 664265.7895 | -0.5782   |
| -0.5879       |             |            |             |           |
| [2849]ENERGY: | 620000      | 3517.1397  | 5633.9086   | 5902.0187 |
| 326.2668      | -15118.3496 | -1716.4203 | 0.0000      | 0.0000    |
| 8485.7442     | 7030.3080   | 316.5589   | -1455.4362  | 7099.3772 |
| 315.6203      | 22.8445     | 30.7259    | 664265.7895 | 0.2709    |
| 0.2700        |             |            |             |           |
| [2885]ENERGY: | 630000      | 3523.6628  | 5622.9389   | 5866.4028 |
| 373.7067      | -14988.1503 | -1824.9466 | 0.0000      | 0.0000    |
| 8459.2920     | 7032.9063   | 315.5721   | -1426.3857  | 7099.4792 |
| 315.5317      | -41.6063    | -36.3369   | 664265.7895 | 0.2673    |
| 0.2701        |             |            |             |           |
| [2935]ENERGY: | 640000      | 3444.3025  | 5686.6034   | 5884.3779 |
| 347.4349      | -15023.5751 | -1749.8577 | 0.0000      | 0.0000    |
| 8443.4891     | 7032.7751   | 314.9825   | -1410.7141  | 7099.5514 |
| 315.3725      | 57.8553     | 81.4800    | 664265.7895 | -1.2318   |
| -1.2373       |             |            |             |           |
| [2971]ENERGY: | 650000      | 3471.6304  | 5643.6510   | 5905.8847 |
| 348.6054      | -15006.9213 | -1811.9286 | 0.0000      | 0.0000    |
| 8480.4891     | 7031.4107   | 316.3628   | -1449.0783  | 7100.8517 |
| 315.3990      | -183.9839   | -132.4794  | 664265.7895 | 2.1196    |
| 2.1191        |             |            |             |           |
| [3021]ENERGY: | 660000      | 3405.2740  | 5600.0344   | 5891.7160 |
| 342.6803      | -15007.1157 | -1708.2374 | 0.0000      | 0.0000    |
| 8504.6670     | 7029.0186   | 317.2648   | -1475.6484  | 7100.2784 |
| 315.7165      | 48.2915     | 41.2437    | 664265.7895 | -1.8848   |
| -1.8759       |             |            |             |           |
| [3057]ENERGY: | 670000      | 3441.5492  | 5677.1271   | 5917.6022 |
| 356.8931      | -15051.6053 | -1808.3340 | 0.0000      | 0.0000    |
| 8495.5053     | 7028.7377   | 316.9230   | -1466.7676  | 7100.9463 |
| 315.7515      | -19.6828    | -54.1698   | 664265.7895 | 1.2326    |
| 1.2243        |             |            |             |           |



Supplementary Text 6

|               |           |             |            |             |           |
|---------------|-----------|-------------|------------|-------------|-----------|
| [3107]ENERGY: | 680000    | 3576.0727   | 5597.7818  | 5885.3415   |           |
|               | 341.7638  | -15093.1127 | -1772.3836 | 0.0000      | 0.0000    |
|               | 8497.7555 | 7033.2191   | 317.0069   | -1464.5364  | 7101.8095 |
|               | 315.8756  | -8.5349     | -116.7475  | 664265.7895 | 1.4003    |
|               | 1.3964    |             |            |             |           |
| [3143]ENERGY: | 690000    | 3415.9382   | 5722.3415  | 5875.8222   |           |
|               | 366.7277  | -15017.3217 | -1741.6022 | 0.0000      | 0.0000    |
|               | 8411.8584 | 7033.7640   | 313.8026   | -1378.0943  | 7101.9977 |
|               | 315.9023  | 189.7015    | 89.6214    | 664265.7895 | -2.0165   |
|               | -1.9995   |             |            |             |           |
| [3196]ENERGY: | 700000    | 3448.5534   | 5655.0110  | 5930.3891   |           |
|               | 357.4769  | -14950.3290 | -1838.6841 | 0.0000      | 0.0000    |
|               | 8430.7469 | 7033.1642   | 314.5072   | -1397.5827  | 7101.5855 |
|               | 315.9360  | -99.6142    | -50.8892   | 664265.7895 | 0.3004    |
|               | 0.3122    |             |            |             |           |
| [3232]ENERGY: | 710000    | 3444.1711   | 5700.1376  | 5893.8210   |           |
|               | 362.7736  | -15028.1184 | -1754.8687 | 0.0000      | 0.0000    |
|               | 8416.9189 | 7034.8352   | 313.9913   | -1382.0837  | 7103.6086 |
|               | 315.9506  | 165.0241    | 120.2987   | 664265.7895 | -2.6409   |
|               | -2.6749   |             |            |             |           |
| [3282]ENERGY: | 720000    | 3544.7315   | 5720.1996  | 5918.4480   |           |
|               | 350.7104  | -15084.6187 | -1817.0976 | 0.0000      | 0.0000    |
|               | 8404.1770 | 7036.5502   | 313.5160   | -1367.6269  | 7103.4173 |
|               | 316.2871  | 148.3087    | 76.0740    | 664265.7895 | -2.1091   |
|               | -2.0781   |             |            |             |           |
| [3318]ENERGY: | 730000    | 3453.3476   | 5743.4209  | 5882.2231   |           |
|               | 368.1552  | -15202.8537 | -1788.0633 | 0.0000      | 0.0000    |
|               | 8574.1401 | 7030.3699   | 319.8564   | -1543.7702  | 7101.5928 |
|               | 317.0615  | -83.2123    | 22.6712    | 664265.7895 | -5.6970   |
|               | -5.6926   |             |            |             |           |
| [3368]ENERGY: | 740000    | 3556.2968   | 5629.8658  | 5952.1065   |           |
|               | 341.7107  | -15206.6296 | -1781.6841 | 0.0000      | 0.0000    |
|               | 8543.7856 | 7035.4516   | 318.7241   | -1508.3340  | 7100.3995 |
|               | 318.0858  | 41.3474     | 68.0264    | 664265.7895 | -6.4541   |
|               | -6.4810   |             |            |             |           |
| [3404]ENERGY: | 750000    | 3559.3608   | 5779.5642  | 5906.5039   |           |
|               | 352.5989  | -15187.1281 | -1865.4322 | 0.0000      | 0.0000    |
|               | 8489.9830 | 7035.4506   | 316.7170   | -1454.5324  | 7102.1589 |
|               | 318.6641  | 21.0793     | 39.0401    | 664265.7895 | -8.6660   |
|               | -8.6388   |             |            |             |           |
| [3454]ENERGY: | 760000    | 3481.1441   | 5640.8714  | 5872.0603   |           |
|               | 365.1531  | -15066.0515 | -1836.4745 | 0.0000      | 0.0000    |
|               | 8575.7931 | 7032.4961   | 319.9181   | -1543.2970  | 7101.2487 |
|               | 318.7074  | -29.8927    | -88.4980   | 664265.7895 | -8.5268   |
|               | -8.5466   |             |            |             |           |
| [3490]ENERGY: | 770000    | 3581.9971   | 5647.3814  | 5923.8627   |           |
|               | 356.5404  | -15163.1157 | -1871.0973 | 0.0000      | 0.0000    |
|               | 8559.2402 | 7034.8088   | 319.3006   | -1524.4314  | 7101.6359 |
|               | 318.8478  | 34.4097     | 5.4662     | 664265.7895 | -5.7521   |
|               | -5.7545   |             |            |             |           |
| [3540]ENERGY: | 780000    | 3514.7610   | 5650.1971  | 5875.3809   |           |
|               | 332.2029  | -15113.3349 | -1801.8097 | 0.0000      | 0.0000    |
|               | 8579.1822 | 7036.5795   | 320.0445   | -1542.6027  | 7101.0198 |
|               | 318.8377  | -58.5613    | -145.8306  | 664265.7895 | -20.9937  |

Supplementary Text 6

-20.9911  
 [3576]ENERGY: 790000 3537.8558 5810.7267 5863.7652  
 335.9187 -15155.8188 -1867.3949 0.0000 0.0000  
 8508.7799 7033.8326 317.4182 -1474.9474 7100.2804  
 319.0549 -4.1505 -50.5991 664265.7895 -16.5709  
 -16.5708  
 [3629]ENERGY: 800000 3616.8274 5766.3376 5909.0216  
 342.6012 -15232.8778 -1865.7372 0.0000 0.0000  
 8499.6549 7035.8278 317.0778 -1463.8272 7100.8748  
 319.1513 -41.1238 -41.0475 664265.7895 -12.2574  
 -12.2567  
 [3665]ENERGY: 810000 3507.5212 5782.6241 5945.0767  
 343.4092 -15193.1336 -1849.4133 0.0000 0.0000  
 8495.7638 7031.8482 316.9326 -1463.9157 7101.3661  
 319.0911 11.8848 -91.9358 664265.7895 -10.6035  
 -10.6057  
 [3715]ENERGY: 820000 3505.0028 5652.1712 5912.8391  
 356.2163 -15231.1848 -1777.1719 0.0000 0.0000  
 8612.3701 7030.2429 321.2826 -1582.1273 7100.9467  
 319.1255 71.6419 22.5304 664265.7895 -12.0511  
 -12.0502  
 [3751]ENERGY: 830000 3514.5419 5796.3343 5890.9073  
 365.9597 -15243.9558 -1868.4503 0.0000 0.0000  
 8578.9529 7034.2900 320.0360 -1544.6629 7103.3504  
 319.0159 -67.9961 -94.3753 664265.7895 -18.5286  
 -18.5140  
 [3801]ENERGY: 840000 3461.8941 5753.4333 5896.9793  
 355.2193 -15199.6908 -1803.0320 0.0000 0.0000  
 8569.4875 7034.2907 319.6829 -1535.1968 7103.6506  
 319.3140 14.5487 20.9285 664265.7895 -12.6724  
 -12.6923  
 [3837]ENERGY: 850000 3509.2203 5727.7650 5867.5497  
 356.0214 -15220.3322 -1816.7348 0.0000 0.0000  
 8610.3157 7033.8051 321.2060 -1576.5106 7104.3608  
 319.4057 -68.6115 -94.6259 664265.7895 -8.7787  
 -8.7689  
 [3887]ENERGY: 860000 3491.3698 5790.8622 5904.0445  
 362.0689 -15171.9917 -1904.9002 0.0000 0.0000  
 8560.7667 7032.2203 319.3576 -1528.5464 7104.0561  
 319.3661 -28.4422 35.9736 664265.7895 -9.5496  
 -9.5433  
 [3923]ENERGY: 870000 3562.5579 5702.8449 5917.8733  
 347.9722 -15208.2889 -1756.0968 0.0000 0.0000  
 8470.0203 7036.8829 315.9723 -1433.1374 7104.1437  
 319.5286 -173.3270 -147.7073 664265.7895 -15.9202  
 -15.9148  
 [3973]ENERGY: 880000 3518.4842 5728.9699 5834.5221  
 343.0513 -15211.6274 -1787.2288 0.0000 0.0000  
 8605.9825 7032.1537 321.0443 -1573.8287 7103.5142  
 319.4771 74.6796 2.1260 664265.7895 -13.0934  
 -13.0989  
 [4009]ENERGY: 890000 3599.4617 5712.1056 5938.2489  
 362.5761 -15182.4169 -1854.1161 0.0000 0.0000  
 8462.8229 7038.6822 315.7038 -1424.1406 7104.7008

## Supplementary Text 6

|               |             |            |             |           |
|---------------|-------------|------------|-------------|-----------|
| 319.3378      | 46.8203     | -7.9414    | 664265.7895 | -19.5268  |
| -19.5281      |             |            |             |           |
| [4062]ENERGY: | 900000      | 3626.5064  | 5735.7517   | 5892.3665 |
| 320.9385      | -15246.5343 | -1842.8171 | 0.0000      | 0.0000    |
| 8548.5021     | 7034.7137   | 318.9000   | -1513.7884  | 7104.9435 |
| 319.4514      | -292.8328   | -201.0221  | 664265.7895 | -12.0086  |
| -12.0068      |             |            |             |           |
| [4098]ENERGY: | 910000      | 3413.9841  | 5668.8063   | 5848.1856 |
| 359.5440      | -15080.2927 | -1882.1202 | 0.0000      | 0.0000    |
| 8702.8277     | 7030.9349   | 324.6571   | -1671.8928  | 7105.4797 |
| 319.2143      | 83.1398     | -131.2131  | 664265.7895 | -18.2312  |
| -18.2406      |             |            |             |           |
| [4148]ENERGY: | 920000      | 3568.9714  | 5817.9294   | 5822.2992 |
| 348.9902      | -15141.0064 | -1882.9597 | 0.0000      | 0.0000    |
| 8501.8282     | 7036.0524   | 317.1589   | -1465.7759  | 7104.8168 |
| 319.4367      | -123.1863   | -79.4961   | 664265.7895 | -9.6287   |
| -9.6296       |             |            |             |           |
| [4184]ENERGY: | 930000      | 3516.7154  | 5722.1642   | 5915.7171 |
| 340.7575      | -15120.6515 | -1801.2659 | 0.0000      | 0.0000    |
| 8463.7262     | 7037.1629   | 315.7375   | -1426.5633  | 7105.8488 |
| 319.6707      | -186.6561   | -154.4953  | 664265.7895 | -14.2192  |
| -14.2042      |             |            |             |           |
| [4234]ENERGY: | 940000      | 3543.7145  | 5741.8177   | 5881.0229 |
| 344.2853      | -15191.9263 | -1827.0940 | 0.0000      | 0.0000    |
| 8543.7856     | 7035.6057   | 318.7241   | -1508.1799  | 7104.9774 |
| 319.5157      | -82.3702    | -79.1339   | 664265.7895 | -11.5187  |
| -11.5367      |             |            |             |           |
| [4270]ENERGY: | 950000      | 3446.6829  | 5666.2125   | 5920.3264 |
| 343.3813      | -15159.9937 | -1760.4399 | 0.0000      | 0.0000    |
| 8580.5939     | 7036.7635   | 320.0972   | -1543.8304  | 7106.7193 |
| 319.5164      | -10.5715    | -29.3883   | 664265.7895 | -13.3131  |
| -13.3155      |             |            |             |           |
| [4320]ENERGY: | 960000      | 3499.0998  | 5756.6720   | 5931.2613 |
| 374.6202      | -15139.2273 | -1867.2720 | 0.0000      | 0.0000    |
| 8485.4773     | 7040.6313   | 316.5489   | -1444.8460  | 7107.9948 |
| 319.6811      | -91.7567    | -64.6145   | 664265.7895 | -11.0963  |
| -11.0933      |             |            |             |           |
| [4356]ENERGY: | 970000      | 3497.1715  | 5719.8019   | 5889.4242 |
| 366.1482      | -15129.4946 | -1797.4611 | 0.0000      | 0.0000    |
| 8492.7054     | 7038.2956   | 316.8185   | -1454.4099  | 7105.6118 |
| 319.6248      | -105.8279   | -69.0651   | 664265.7895 | -17.0783  |
| -17.0673      |             |            |             |           |
| [4406]ENERGY: | 980000      | 3471.9856  | 5824.7955   | 5885.0843 |
| 337.1295      | -15097.7732 | -1932.9456 | 0.0000      | 0.0000    |
| 8549.3867     | 7037.6628   | 318.9330   | -1511.7239  | 7107.1958 |
| 319.6647      | 50.5128     | 38.4516    | 664265.7895 | -13.9892  |
| -13.9948      |             |            |             |           |
| [4442]ENERGY: | 990000      | 3536.1770  | 5769.1191   | 5813.0235 |
| 338.7831      | -15154.3641 | -1855.1158 | 0.0000      | 0.0000    |
| 8594.1497     | 7041.7724   | 320.6029   | -1552.3773  | 7107.7315 |
| 319.6894      | 26.0554     | -5.9328    | 664265.7895 | -18.4870  |
| -18.5019      |             |            |             |           |
| [4495]ENERGY: | 1000000     | 3499.6059  | 5702.5003   | 5890.1385 |
| 338.9883      | -15213.0103 | -1736.1932 | 0.0000      | 0.0000    |

## Supplementary Text 6

|                      |            |             |             |           |
|----------------------|------------|-------------|-------------|-----------|
| 8557.7974            | 7039.8270  | 319.2468    | -1517.9704  | 7105.7492 |
| 319.6962             | 148.2703   | 132.3973    | 664265.7895 | -19.5908  |
| -19.5890             |            |             |             |           |
| [268]ENERGY: 1010000 | 3564.6794  | 5636.7333   | 5883.2314   | 364.5394  |
| -15195.6911          | -1812.9826 | 0.0000      | 0.0000      | 8597.2648 |
| 7037.7746            | 320.7191   | -1559.4902  | 7107.4515   | 319.8131  |
| -25.1495             | -1.5146    | 664265.7895 | -18.5601    | -18.5383  |
| [307]ENERGY: 1020000 | 3539.1870  | 5733.9983   | 5908.9809   | 364.2276  |
| -15152.0874          | -1861.4279 | 0.0000      | 0.0000      | 8506.7057 |
| 7039.5843            | 317.3408   | -1467.1214  | 7107.3758   | 319.8780  |
| -15.0692             | -3.0424    | 664265.7895 | -22.6391    | -22.6636  |
| [359]ENERGY: 1030000 | 3561.3961  | 5718.2051   | 5949.9086   | 340.2536  |
| -15294.1332          | -1860.2648 | 0.0000      | 0.0000      | 8620.1959 |
| 7035.5612            | 321.5746   | -1584.6347  | 7108.1381   | 319.8159  |
| -263.7548            | -231.4252  | 664265.7895 | -17.1114    | -17.0863  |
| [397]ENERGY: 1040000 | 3498.8255  | 5680.5072   | 5917.6178   | 349.7783  |
| -15175.7446          | -1805.5473 | 0.0000      | 0.0000      | 8571.3137 |
| 7036.7507            | 319.7510   | -1534.5630  | 7106.9737   | 319.9228  |
| 54.6470              | -11.2181   | 664265.7895 | -19.9948    | -20.0108  |
| [449]ENERGY: 1050000 | 3579.7145  | 5603.8946   | 5911.4611   | 361.1449  |
| -15179.7602          | -1787.5962 | 0.0000      | 0.0000      | 8551.1605 |
| 7040.0193            | 318.9992   | -1511.1412  | 7108.0197   | 319.9869  |
| -5.3298              | -38.3186   | 664265.7895 | -19.4509    | -19.4521  |
| [487]ENERGY: 1060000 | 3601.5803  | 5719.2849   | 5894.6315   | 354.3160  |
| -15223.6474          | -1852.6753 | 0.0000      | 0.0000      | 8545.3564 |
| 7038.8463            | 318.7827   | -1506.5101  | 7108.0574   | 320.0449  |
| -109.6301            | -162.3144  | 664265.7895 | -19.4080    | -19.3994  |
| [538]ENERGY: 1070000 | 3476.3177  | 5841.3469   | 5894.3097   | 364.8748  |
| -15258.7830          | -1828.7240 | 0.0000      | 0.0000      | 8547.3857 |
| 7036.7278            | 318.8584   | -1510.6579  | 7108.2686   | 319.7146  |
| -17.1275             | -163.4269  | 664265.7895 | -16.4862    | -16.4929  |
| [575]ENERGY: 1080000 | 3497.5837  | 5740.4164   | 5905.0440   | 359.5358  |
| -15157.9047          | -1829.8781 | 0.0000      | 0.0000      | 8525.7851 |
| 7040.5821            | 318.0526   | -1485.2030  | 7108.5263   | 319.7312  |
| -106.1282            | -148.0595  | 664265.7895 | -18.6974    | -18.7102  |
| [626]ENERGY: 1090000 | 3518.9351  | 5819.4921   | 5895.6763   | 360.8016  |
| -15164.6724          | -1876.7929 | 0.0000      | 0.0000      | 8491.9418 |
| 7045.3817            | 316.7901   | -1446.5602  | 7109.5680   | 319.8603  |
| 19.1135              | -33.8778   | 664265.7895 | -18.9984    | -18.9878  |
| [666]ENERGY: 1100000 | 3584.1196  | 5700.6215   | 5874.8279   | 341.9818  |
| -15221.6115          | -1734.7433 | 0.0000      | 0.0000      | 8495.3769 |
| 7040.5727            | 316.9182   | -1454.8042  | 7107.7743   | 320.0457  |
| 42.6461              | -5.1171    | 664265.7895 | -6.6738     | -6.6917   |
| [717]ENERGY: 1110000 | 3518.9188  | 5659.7129   | 5870.5463   | 354.4174  |
| -15195.7767          | -1750.3719 | 0.0000      | 0.0000      | 8586.3020 |
| 7043.7488            | 320.3101   | -1542.5532  | 7110.7501   | 320.1200  |
| 124.1860             | 37.4778    | 664265.7895 | -10.4170    | -10.3876  |
| [753]ENERGY: 1120000 | 3471.0286  | 5768.0088   | 5889.7671   | 355.3761  |
| -15152.5339          | -1885.2228 | 0.0000      | 0.0000      | 8592.9864 |
| 7039.4103            | 320.5595   | -1553.5761  | 7110.9557   | 320.0420  |
| 80.9906              | -97.2689   | 664265.7895 | -12.5648    | -12.5733  |
| [803]ENERGY: 1130000 | 3435.9600  | 5699.8953   | 5910.9633   | 381.3902  |
| -15159.0212          | -1795.2813 | 0.0000      | 0.0000      | 8569.5647 |
| 7043.4711            | 319.6858   | -1526.0936  | 7111.0585   | 320.0710  |

Supplementary Text 6

|               |             |             |             |             |           |
|---------------|-------------|-------------|-------------|-------------|-----------|
|               | 68.9083     | 50.7349     | 664265.7895 | -10.9169    | -10.9370  |
| [839]ENERGY:  | 1140000     | 3502.5752   | 5807.6131   | 5885.2333   | 318.8968  |
|               | -15161.6131 | -1870.6254  | 0.0000      | 0.0000      | 8559.3601 |
|               | 7041.4400   | 319.3051    | -1517.9201  | 7110.9308   | 320.1090  |
|               | -42.7024    | -8.6703     | 664265.7895 | -19.2689    | -19.2472  |
| [889]ENERGY:  | 1150000     | 3491.5365   | 5662.8597   | 5839.3721   | 338.1243  |
|               | -15069.3814 | -1799.4754  | 0.0000      | 0.0000      | 8579.6444 |
|               | 7042.6802   | 320.0618    | -1536.9641  | 7112.6492   | 319.8924  |
|               | 63.1068     | 1.1657      | 664265.7895 | -20.3419    | -20.3351  |
| [925]ENERGY:  | 1160000     | 3591.6218   | 5792.0661   | 5833.8578   | 361.7915  |
|               | -15251.9507 | -1860.8104  | 0.0000      | 0.0000      | 8578.4561 |
|               | 7045.0323   | 320.0175    | -1533.4239  | 7113.7996   | 320.1325  |
|               | -31.0692    | -32.7593    | 664265.7895 | -15.5410    | -15.5515  |
| [975]ENERGY:  | 1170000     | 3542.5982   | 5710.3730   | 5880.3072   | 371.4318  |
|               | -15222.4932 | -1838.5349  | 0.0000      | 0.0000      | 8600.1077 |
|               | 7043.7898   | 320.8252    | -1556.3179  | 7112.6522   | 319.9752  |
|               | -40.9827    | -58.5018    | 664265.7895 | -9.1255     | -9.1144   |
| [1011]ENERGY: | 1180000     | 3508.9449   | 5774.1153   | 5858.8860   |           |
|               | 358.8004    | -15255.0269 | -1805.5606  | 0.0000      | 0.0000    |
|               | 8602.7481   | 7042.9073   | 320.9237    | -1559.8408  | 7112.1472 |
|               | 319.8381    | 73.5895     | 83.6402     | 664265.7895 | -19.5487  |
|               | -19.5517    |             |             |             |           |
| [1061]ENERGY: | 1190000     | 3504.9802   | 5715.2261   | 5909.5015   |           |
|               | 349.4420    | -15158.6095 | -1798.5787  | 0.0000      | 0.0000    |
|               | 8522.3095   | 7044.2711   | 317.9229    | -1478.0384  | 7112.7955 |
|               | 320.1978    | -31.2041    | -6.1329     | 664265.7895 | -20.3718  |
|               | -20.3595    |             |             |             |           |
| [1100]ENERGY: | 1200000     | 3475.6924   | 5813.2420   | 5867.2523   |           |
|               | 358.1195    | -15193.3903 | -1869.2116  | 0.0000      | 0.0000    |
|               | 8589.6660   | 7041.3703   | 320.4356    | -1548.2957  | 7113.8952 |
|               | 320.0507    | 7.1894      | -94.9941    | 664265.7895 | -27.9058  |
|               | -27.9289    |             |             |             |           |
| [1150]ENERGY: | 1210000     | 3577.6200   | 5876.3549   | 5873.2994   |           |
|               | 347.3084    | -15232.5877 | -1908.4490  | 0.0000      | 0.0000    |
|               | 8511.2319   | 7044.7779   | 317.5097    | -1466.4540  | 7114.3645 |
|               | 320.0200    | -39.8836    | -114.1344   | 664265.7895 | -22.9513  |
|               | -22.9408    |             |             |             |           |
| [1186]ENERGY: | 1220000     | 3487.8093   | 5759.4313   | 5945.9985   |           |
|               | 351.6881    | -15249.5186 | -1789.3095  | 0.0000      | 0.0000    |
|               | 8542.4275   | 7048.5266   | 318.6734    | -1493.9009  | 7114.8257 |
|               | 319.9593    | 247.8329    | 133.8605    | 664265.7895 | -25.5673  |
|               | -25.5667    |             |             |             |           |
| [1236]ENERGY: | 1230000     | 3517.1222   | 5802.6077   | 5825.5201   |           |
|               | 381.8810    | -15221.9951 | -1843.8655  | 0.0000      | 0.0000    |
|               | 8586.7335   | 7048.0039   | 320.3262    | -1538.7296  | 7115.8143 |
|               | 319.9594    | 41.8841     | -66.7678    | 664265.7895 | -20.7481  |
|               | -20.7364    |             |             |             |           |
| [1272]ENERGY: | 1240000     | 3501.2589   | 5763.6245   | 5861.4110   |           |
|               | 365.9635    | -15202.4031 | -1846.3198  | 0.0000      | 0.0000    |
|               | 8600.9263   | 7044.4613   | 320.8557    | -1556.4650  | 7116.6493 |
|               | 319.8745    | 226.7908    | 93.5937     | 664265.7895 | -23.1520  |
|               | -23.1683    |             |             |             |           |
| [1322]ENERGY: | 1250000     | 3459.1379   | 5810.8587   | 5819.6034   |           |
|               | 348.3431    | -15263.1979 | -1780.0072  | 0.0000      | 0.0000    |

## Supplementary Text 6

|                       |             |            |             |           |
|-----------------------|-------------|------------|-------------|-----------|
| 8650.5987             | 7045.3367   | 322.7087   | -1605.2620  | 7116.4573 |
| 320.0514              | 116.1518    | 146.7744   | 664265.7895 | -21.2440  |
| -21.2478              |             |            |             |           |
| [1358]ENERGY: 1260000 | 3530.5558   | 5722.9480  | 5910.5475   |           |
| 343.7053              | -15171.3021 | -1871.2751 | 0.0000      | 0.0000    |
| 8584.6458             | 7049.8253   | 320.2484   | -1534.8206  | 7116.8825 |
| 320.0977              | -22.2522    | -9.8360    | 664265.7895 | -21.3673  |
| -21.3526              |             |            |             |           |
| [1408]ENERGY: 1270000 | 3566.0445   | 5677.4739  | 5935.5859   |           |
| 364.1915              | -15219.4859 | -1838.9355 | 0.0000      | 0.0000    |
| 8564.3551             | 7049.2296   | 319.4914   | -1515.1256  | 7118.5424 |
| 320.0941              | -13.5412    | -42.9238   | 664265.7895 | -19.0537  |
| -19.0639              |             |            |             |           |
| [1444]ENERGY: 1280000 | 3436.6314   | 5743.6115  | 5856.7717   |           |
| 355.2969              | -15209.8004 | -1806.1872 | 0.0000      | 0.0000    |
| 8667.6661             | 7043.9899   | 323.3454   | -1623.6761  | 7118.4317 |
| 320.1054              | 64.9006     | 44.8133    | 664265.7895 | -23.3793  |
| -23.3808              |             |            |             |           |
| [1494]ENERGY: 1290000 | 3563.5740   | 5725.2614  | 5941.0141   |           |
| 352.4272              | -15275.7057 | -1785.4317 | 0.0000      | 0.0000    |
| 8531.7639             | 7052.9032   | 318.2756   | -1478.8608  | 7120.7389 |
| 320.2454              | -17.5710    | -47.9249   | 664265.7895 | -19.6110  |
| -19.6147              |             |            |             |           |
| [1533]ENERGY: 1300000 | 3532.4835   | 5768.8007  | 5883.5067   |           |
| 381.5877              | -15239.3193 | -1822.1533 | 0.0000      | 0.0000    |
| 8546.8944             | 7051.8004   | 318.8401   | -1495.0940  | 7120.0624 |
| 320.0627              | 89.7438     | 67.2490    | 664265.7895 | -10.1712  |
| -10.1695              |             |            |             |           |
| [1583]ENERGY: 1310000 | 3517.7578   | 5697.9903  | 5917.9903   |           |
| 368.5535              | -15100.4036 | -1905.7042 | 0.0000      | 0.0000    |
| 8552.0664             | 7048.2505   | 319.0330   | -1503.8159  | 7121.0588 |
| 320.1531              | -162.8877   | -192.3068  | 664265.7895 | -18.3914  |
| -18.3890              |             |            |             |           |
| [1619]ENERGY: 1320000 | 3488.0742   | 5747.7218  | 5819.2086   |           |
| 344.7252              | -15264.4300 | -1775.9468 | 0.0000      | 0.0000    |
| 8686.5690             | 7045.9220   | 324.0506   | -1640.6469  | 7118.2550 |
| 320.5028              | 30.7346     | 101.8870   | 664265.7895 | -24.8245  |
| -24.8134              |             |            |             |           |
| [1669]ENERGY: 1330000 | 3594.6184   | 5803.3080  | 5878.4078   |           |
| 356.3332              | -15275.2269 | -1821.0281 | 0.0000      | 0.0000    |
| 8516.2588             | 7052.6712   | 317.6972   | -1463.5876  | 7121.8025 |
| 320.4080              | -25.8492    | -50.0525   | 664265.7895 | -23.1547  |
| -23.1575              |             |            |             |           |
| [1705]ENERGY: 1340000 | 3538.1865   | 5698.0571  | 5911.4366   |           |
| 358.3058              | -15204.9775 | -1828.0174 | 0.0000      | 0.0000    |
| 8577.1426             | 7050.1337   | 319.9685   | -1527.0088  | 7120.1359 |
| 320.6866              | -207.5441   | -140.7946  | 664265.7895 | -23.6114  |
| -23.6306              |             |            |             |           |
| [1755]ENERGY: 1350000 | 3591.2585   | 5647.7553  | 5912.9134   |           |
| 363.7485              | -15235.9268 | -1804.2950 | 0.0000      | 0.0000    |
| 8580.6073             | 7056.0611   | 320.0977   | -1524.5462  | 7121.7178 |
| 320.6344              | -85.3739    | -47.9436   | 664265.7895 | -19.1986  |
| -19.1970              |             |            |             |           |
| [1791]ENERGY: 1360000 | 3557.8690   | 5664.0475  | 5932.5978   |           |

Supplementary Text 6

|                       |             |            |             |           |
|-----------------------|-------------|------------|-------------|-----------|
| 361.4980              | -15180.2751 | -1875.8412 | 0.0000      | 0.0000    |
| 8593.2935             | 7053.1896   | 320.5710   | -1540.1039  | 7121.8662 |
| 320.5870              | -87.8386    | -37.4284   | 664265.7895 | -17.9577  |
| -17.9418              |             |            |             |           |
| [1841]ENERGY: 1370000 | 3526.6662   | 5809.6324  | 5852.3374   |           |
| 342.5855              | -15279.4332 | -1819.9555 | 0.0000      | 0.0000    |
| 8619.4579             | 7051.2907   | 321.5470   | -1568.1673  | 7120.9808 |
| 320.5687              | -106.2685   | -101.4249  | 664265.7895 | -17.3634  |
| -17.3644              |             |            |             |           |
| [1877]ENERGY: 1380000 | 3501.3534   | 5738.6762  | 5892.9504   |           |
| 350.1227              | -15219.8459 | -1741.8603 | 0.0000      | 0.0000    |
| 8533.8842             | 7055.2807   | 318.3547   | -1478.6035  | 7122.3028 |
| 320.5362              | 37.6860     | 59.9820    | 664265.7895 | -21.1874  |
| -21.1869              |             |            |             |           |
| [1927]ENERGY: 1390000 | 3577.5940   | 5718.6635  | 5865.3023   |           |
| 321.9701              | -15131.5939 | -1884.1892 | 0.0000      | 0.0000    |
| 8589.3369             | 7057.0837   | 320.4234   | -1532.2532  | 7124.9600 |
| 320.5245              | 69.0103     | -99.1834   | 664265.7895 | -19.3684  |
| -19.3788              |             |            |             |           |
| [1966]ENERGY: 1400000 | 3522.6388   | 5683.2454  | 5919.6151   |           |
| 356.3209              | -15232.7997 | -1788.5378 | 0.0000      | 0.0000    |
| 8592.5576             | 7053.0403   | 320.5435   | -1539.5173  | 7123.3037 |
| 320.4654              | 193.4962    | 170.5582   | 664265.7895 | -16.5867  |
| -16.5771              |             |            |             |           |
| [2016]ENERGY: 1410000 | 3610.8563   | 5716.8469  | 5923.5734   |           |
| 359.3075              | -15243.1856 | -1845.2000 | 0.0000      | 0.0000    |
| 8534.0485             | 7056.2470   | 318.3608   | -1477.8015  | 7124.4065 |
| 320.6297              | -18.5118    | -39.5433   | 664265.7895 | -19.1129  |
| -19.1149              |             |            |             |           |
| [2052]ENERGY: 1420000 | 3540.1689   | 5854.3447  | 5882.1188   |           |
| 327.2890              | -15273.7161 | -1881.1867 | 0.0000      | 0.0000    |
| 8603.7621             | 7052.7808   | 320.9615   | -1550.9813  | 7124.0079 |
| 320.9556              | -183.2567   | -219.4508  | 664265.7895 | -16.2450  |
| -16.2412              |             |            |             |           |
| [2102]ENERGY: 1430000 | 3572.6490   | 5735.0638  | 5857.5870   |           |
| 366.2123              | -15217.6753 | -1833.9352 | 0.0000      | 0.0000    |
| 8575.8890             | 7055.7906   | 319.9217   | -1520.0984  | 7125.0419 |
| 320.6456              | 49.5867     | 6.3094     | 664265.7895 | -20.5994  |
| -20.6104              |             |            |             |           |
| [2138]ENERGY: 1440000 | 3533.9785   | 5702.3843  | 5867.9825   |           |
| 360.4956              | -15271.8578 | -1802.7951 | 0.0000      | 0.0000    |
| 8663.8794             | 7054.0672   | 323.2042   | -1609.8121  | 7124.8956 |
| 320.6471              | -134.7325   | -57.0019   | 664265.7895 | -11.9038  |
| -11.8931              |             |            |             |           |
| [2188]ENERGY: 1450000 | 3384.9111   | 5691.1033  | 5934.8058   |           |
| 362.1186              | -15175.1667 | -1813.1426 | 0.0000      | 0.0000    |
| 8670.0800             | 7054.7096   | 323.4355   | -1615.3705  | 7124.4236 |
| 320.6569              | 128.9118    | 136.2106   | 664265.7895 | -10.5710  |
| -10.5578              |             |            |             |           |
| [2224]ENERGY: 1460000 | 3569.3994   | 5706.4514  | 5885.9650   |           |
| 346.0225              | -15258.0911 | -1787.2905 | 0.0000      | 0.0000    |
| 8591.7325             | 7054.1892   | 320.5127   | -1537.5433  | 7124.7868 |
| 320.7066              | -26.2689    | 8.9060     | 664265.7895 | -16.1120  |
| -16.1270              |             |            |             |           |

Supplementary Text 6

|                       |             |            |             |           |
|-----------------------|-------------|------------|-------------|-----------|
| [2274]ENERGY: 1470000 | 3538.8208   | 5699.9593  | 5909.4533   |           |
| 377.4529              | -15273.6499 | -1814.1781 | 0.0000      | 0.0000    |
| 8615.0909             | 7052.9492   | 321.3841   | -1562.1418  | 7123.3740 |
| 320.6406              | -33.1178    | -50.6229   | 664265.7895 | -17.9998  |
| -18.0119              |             |            |             |           |
| [2310]ENERGY: 1480000 | 3603.0117   | 5770.9225  | 5835.3733   |           |
| 342.1215              | -15196.9649 | -1767.7784 | 0.0000      | 0.0000    |
| 8471.9819             | 7058.6676   | 316.0455   | -1413.3142  | 7123.3067 |
| 320.4948              | -42.1490    | -17.7973   | 664265.7895 | -22.2224  |
| -22.2062              |             |            |             |           |
| [2360]ENERGY: 1490000 | 3539.1244   | 5727.2972  | 5901.3946   |           |
| 360.8847              | -15235.8757 | -1863.2877 | 0.0000      | 0.0000    |
| 8624.9027             | 7054.4402   | 321.7501   | -1570.4625  | 7123.7768 |
| 320.9066              | -50.5853    | -86.9255   | 664265.7895 | -17.3216  |
| -17.3509              |             |            |             |           |
| [2399]ENERGY: 1500000 | 3467.0605   | 5678.8655  | 5917.8883   |           |
| 374.5596              | -15224.5719 | -1755.6627 | 0.0000      | 0.0000    |
| 8595.0954             | 7053.2346   | 320.6382   | -1541.8608  | 7122.9940 |
| 320.9812              | 168.4652    | 142.5561   | 664265.7895 | -20.0361  |
| -20.0281              |             |            |             |           |
| [2449]ENERGY: 1510000 | 3572.3070   | 5744.5193  | 5835.0554   |           |
| 344.8028              | -15237.8430 | -1874.0244 | 0.0000      | 0.0000    |
| 8673.8873             | 7058.7044   | 323.5775   | -1615.1830  | 7125.3837 |
| 320.8387              | -26.1315    | -61.7735   | 664265.7895 | -22.2211  |
| -22.2124              |             |            |             |           |
| [2485]ENERGY: 1520000 | 3484.8290   | 5725.1753  | 5871.2173   |           |
| 364.4997              | -15139.3312 | -1792.9754 | 0.0000      | 0.0000    |
| 8547.3505             | 7060.7653   | 318.8571   | -1486.5852  | 7125.8791 |
| 321.0702              | 39.8936     | -49.5388   | 664265.7895 | -16.4296  |
| -16.4336              |             |            |             |           |
| [2535]ENERGY: 1530000 | 3510.9318   | 5779.7883  | 6003.8147   |           |
| 363.9789              | -15339.2115 | -1780.0314 | 0.0000      | 0.0000    |
| 8515.5289             | 7054.7997   | 317.6700   | -1460.7292  | 7125.6287 |
| 320.8877              | 73.2589     | -8.1432    | 664265.7895 | -13.8150  |
| -13.8220              |             |            |             |           |
| [2571]ENERGY: 1540000 | 3511.5519   | 5733.3232  | 5855.5768   |           |
| 366.9196              | -15263.3373 | -1756.8107 | 0.0000      | 0.0000    |
| 8606.6633             | 7053.8869   | 321.0697   | -1552.7764  | 7123.9293 |
| 320.9415              | 44.1092     | 6.1685     | 664265.7895 | -7.7698   |
| -7.7494               |             |            |             |           |
| [2621]ENERGY: 1550000 | 3586.4640   | 5768.8501  | 5885.6667   |           |
| 363.5462              | -15220.4880 | -1852.1192 | 0.0000      | 0.0000    |
| 8527.8603             | 7059.7801   | 318.1300   | -1468.0802  | 7123.1574 |
| 321.0507              | -98.6470    | -110.8486  | 664265.7895 | -11.0575  |
| -11.0551              |             |            |             |           |
| [2657]ENERGY: 1560000 | 3497.9171   | 5679.5647  | 5796.3758   |           |
| 341.5850              | -15190.0210 | -1800.9655 | 0.0000      | 0.0000    |
| 8728.0484             | 7052.5044   | 325.5980   | -1675.5439  | 7123.8818 |
| 320.9293              | -77.9328    | -46.4855   | 664265.7895 | -12.5744  |
| -12.5803              |             |            |             |           |
| [2707]ENERGY: 1570000 | 3556.7884   | 5690.7268  | 5874.3789   |           |
| 374.6618              | -15218.1014 | -1801.9667 | 0.0000      | 0.0000    |
| 8578.1273             | 7054.6151   | 320.0052   | -1523.5122  | 7123.3400 |
| 320.7110              | 44.5977     | 73.4039    | 664265.7895 | -17.9183  |



Supplementary Text 6

-17.9303  
 [2743]ENERGY: 1580000      3569.9994      5786.2069      5884.2976  
 336.9465      -15204.8864      -1862.1868      0.0000      0.0000  
 8546.3255      7056.7027      318.8188      -1489.6228      7124.8890  
 320.9150      -56.6500      -80.8053      664265.7895      -15.1429  
 -15.1321  
 [2793]ENERGY: 1590000      3505.1245      5688.6357      5933.5425  
 358.0735      -15147.4637      -1884.4668      0.0000      0.0000  
 8597.6487      7051.0943      320.7334      -1546.5543      7124.2144  
 320.6200      -28.9193      -74.1860      664265.7895      -28.4350  
 -28.4465  
 [2832]ENERGY: 1600000      3534.2014      5632.3973      5924.2474  
 367.6179      -15262.4557      -1812.2808      0.0000      0.0000  
 8667.7782      7051.5057      323.3496      -1616.2726      7123.7313  
 320.9676      0.1533      45.8452      664265.7895      -19.4354  
 -19.4172  
 [2882]ENERGY: 1610000      3563.0825      5796.3932      5844.4506  
 351.8791      -15287.3288      -1769.4588      0.0000      0.0000  
 8554.8076      7053.8254      319.1353      -1500.9821      7124.0220  
 320.6292      105.9901      117.6842      664265.7895      -25.0123  
 -25.0205  
 [2918]ENERGY: 1620000      3555.6325      5706.4035      5856.0266  
 352.5595      -15152.8549      -1843.2698      0.0000      0.0000  
 8583.5486      7058.0460      320.2074      -1525.5026      7124.7308  
 320.7556      -187.1543      -104.2606      664265.7895      -24.0846  
 -24.0710  
 [2968]ENERGY: 1630000      3546.6443      5767.6694      5902.3954  
 369.5883      -15240.5915      -1856.2801      0.0000      0.0000  
 8568.5649      7057.9907      319.6485      -1510.5742      7125.2576  
 320.8774      203.4181      192.7973      664265.7895      -15.4639  
 -15.4761  
 [3004]ENERGY: 1640000      3553.0686      5709.5954      5846.3004  
 360.6043      -15199.7129      -1783.8971      0.0000      0.0000  
 8575.2929      7061.2517      319.8995      -1514.0412      7125.7847  
 320.8750      -63.4268      -62.2007      664265.7895      -23.5489  
 -23.5409  
 [3054]ENERGY: 1650000      3580.8847      5691.2822      5916.5993  
 354.7852      -15206.3225      -1808.9720      0.0000      0.0000  
 8530.1436      7058.4004      318.2152      -1471.7433      7125.3031  
 320.7165      -101.8751      -25.9588      664265.7895      -23.7836  
 -23.7863  
 [3090]ENERGY: 1660000      3517.0288      5772.2394      5918.1499  
 366.7265      -15292.5417      -1810.1154      0.0000      0.0000  
 8583.5823      7055.0698      320.2087      -1528.5125      7126.2213  
 320.9257      21.0045      -13.1698      664265.7895      -24.4310  
 -24.4461  
 [3140]ENERGY: 1670000      3596.1439      5728.2310      5888.5654  
 366.9125      -15262.3765      -1850.5683      0.0000      0.0000  
 8594.6236      7061.5316      320.6206      -1533.0920      7126.3182  
 320.7597      -30.4886      -105.4642      664265.7895      -22.8140  
 -22.8008  
 [3176]ENERGY: 1680000      3510.4375      5755.6320      5942.6844  
 364.0425      -15199.2449      -1832.4458      0.0000      0.0000  
 8520.0559      7061.1616      317.8388      -1458.8942      7128.0043

## Supplementary Text 6

|                       |             |            |             |           |
|-----------------------|-------------|------------|-------------|-----------|
| 320.6904              | 187.8388    | 162.6133   | 664265.7895 | -18.1712  |
| -18.1708              |             |            |             |           |
| [3226]ENERGY: 1690000 | 3517.7988   | 5715.8724  | 5903.7202   |           |
| 365.7676              | -15133.5572 | -1908.5361 | 0.0000      | 0.0000    |
| 8597.1106             | 7058.1763   | 320.7134   | -1538.9343  | 7127.7922 |
| 320.7427              | -115.8712   | -50.8329   | 664265.7895 | -20.0808  |
| -20.0901              |             |            |             |           |
| [3265]ENERGY: 1700000 | 3580.4542   | 5832.4632  | 5868.7378   |           |
| 345.6558              | -15257.7884 | -1798.2833 | 0.0000      | 0.0000    |
| 8487.0599             | 7058.2992   | 316.6079   | -1428.7607  | 7126.8085 |
| 320.6998              | -41.3140    | -90.3796   | 664265.7895 | -20.1754  |
| -20.1692              |             |            |             |           |
| [3315]ENERGY: 1710000 | 3539.8063   | 5727.4966  | 5904.3024   |           |
| 371.3663              | -15287.1054 | -1847.9538 | 0.0000      | 0.0000    |
| 8648.0623             | 7055.9746   | 322.6141   | -1592.0876  | 7127.4371 |
| 320.8329              | -39.2390    | -94.2939   | 664265.7895 | -21.9906  |
| -21.9946              |             |            |             |           |
| [3351]ENERGY: 1720000 | 3567.4332   | 5802.8814  | 5849.1987   |           |
| 342.6554              | -15385.7960 | -1763.5254 | 0.0000      | 0.0000    |
| 8644.2238             | 7057.0711   | 322.4709   | -1587.1527  | 7126.5909 |
| 321.0492              | -187.5685   | -147.7950  | 664265.7895 | -19.0296  |
| -19.0242              |             |            |             |           |
| [3401]ENERGY: 1730000 | 3542.8514   | 5813.1807  | 5868.6133   |           |
| 346.5503              | -15234.5358 | -1839.9186 | 0.0000      | 0.0000    |
| 8563.5270             | 7060.2684   | 319.4605   | -1503.2587  | 7125.8359 |
| 320.9475              | -115.1168   | -114.0398  | 664265.7895 | -17.8281  |
| -17.8305              |             |            |             |           |
| [3437]ENERGY: 1740000 | 3478.1048   | 5807.6352  | 5865.3370   |           |
| 344.7425              | -15250.8674 | -1755.4485 | 0.0000      | 0.0000    |
| 8568.3516             | 7057.8553   | 319.6405   | -1510.4963  | 7127.0550 |
| 320.7319              | 276.0430    | 181.2160   | 664265.7895 | -6.9634   |
| -6.9764               |             |            |             |           |
| [3487]ENERGY: 1750000 | 3546.9946   | 5657.7823  | 5953.0884   |           |
| 365.2126              | -15284.7003 | -1811.7159 | 0.0000      | 0.0000    |
| 8629.4976             | 7056.1592   | 321.9215   | -1573.3383  | 7126.7558 |
| 320.8121              | -74.4845    | -50.5367   | 664265.7895 | -6.0079   |
| -6.0025               |             |            |             |           |
| [3523]ENERGY: 1760000 | 3560.8836   | 5810.8139  | 5855.0471   |           |
| 324.4383              | -15310.3851 | -1748.8371 | 0.0000      | 0.0000    |
| 8567.5308             | 7059.4914   | 319.6099   | -1508.0394  | 7127.2732 |
| 320.5860              | -16.7125    | 56.3957    | 664265.7895 | -8.9510   |
| -8.9372               |             |            |             |           |
| [3573]ENERGY: 1770000 | 3532.0681   | 5691.2302  | 5803.7424   |           |
| 365.7019              | -15103.6959 | -1807.3008 | 0.0000      | 0.0000    |
| 8576.9192             | 7058.6651   | 319.9601   | -1518.2541  | 7127.2157 |
| 320.8777              | 146.8273    | 76.7069    | 664265.7895 | -14.0124  |
| -14.0240              |             |            |             |           |
| [3609]ENERGY: 1780000 | 3534.9116   | 5650.1121  | 5877.8978   |           |
| 378.3965              | -15206.4330 | -1823.9568 | 0.0000      | 0.0000    |
| 8649.6877             | 7060.6159   | 322.6747   | -1589.0717  | 7128.5947 |
| 320.9126              | 84.6182     | 25.8069    | 664265.7895 | -11.7932  |
| -11.7861              |             |            |             |           |
| [3659]ENERGY: 1790000 | 3518.1780   | 5710.3934  | 5865.6433   |           |
| 352.2544              | -15129.2754 | -1806.7327 | 0.0000      | 0.0000    |

## Supplementary Text 6

|                       |             |            |             |           |
|-----------------------|-------------|------------|-------------|-----------|
| 8553.2904             | 7063.7514   | 319.0787   | -1489.5390  | 7129.8817 |
| 320.7528              | 22.5024     | -29.0172   | 664265.7895 | -10.8239  |
| -10.8237              |             |            |             |           |
| [3698]ENERGY: 1800000 | 3504.0011   | 5673.6773  | 5874.6380   |           |
| 346.2247              | -15208.8084 | -1766.1373 | 0.0000      | 0.0000    |
| 8638.1016             | 7061.6971   | 322.2425   | -1576.4045  | 7128.8192 |
| 320.7407              | -12.1221    | 50.7539    | 664265.7895 | -22.2380  |
| -22.2462              |             |            |             |           |
| [3748]ENERGY: 1810000 | 3525.1463   | 5830.9255  | 5907.8384   |           |
| 359.9465              | -15217.0247 | -1864.7758 | 0.0000      | 0.0000    |
| 8520.8656             | 7062.9217   | 317.8691   | -1457.9439  | 7128.3576 |
| 320.6090              | -151.3520   | -66.7500   | 664265.7895 | -23.2907  |
| -23.2775              |             |            |             |           |
| [3784]ENERGY: 1820000 | 3461.9605   | 5769.5502  | 5905.5114   |           |
| 336.6158              | -15208.9008 | -1792.7136 | 0.0000      | 0.0000    |
| 8590.2652             | 7062.2887   | 320.4580   | -1527.9765  | 7128.3754 |
| 320.5949              | -25.1123    | -21.1450   | 664265.7895 | -18.6792  |
| -18.6774              |             |            |             |           |
| [3834]ENERGY: 1830000 | 3577.6788   | 5735.0053  | 5909.5368   |           |
| 348.3919              | -15324.3669 | -1841.1401 | 0.0000      | 0.0000    |
| 8653.3291             | 7058.4349   | 322.8106   | -1594.8942  | 7129.3411 |
| 320.7723              | -94.7614    | -127.3462  | 664265.7895 | -15.3844  |
| -15.3842              |             |            |             |           |
| [3870]ENERGY: 1840000 | 3553.5626   | 5729.5311  | 5847.2998   |           |
| 356.4731              | -15170.2208 | -1778.7545 | 0.0000      | 0.0000    |
| 8523.0346             | 7060.9259   | 317.9500   | -1462.1087  | 7129.7056 |
| 320.7840              | 102.5097    | 17.3514    | 664265.7895 | -15.7745  |
| -15.7910              |             |            |             |           |
| [3920]ENERGY: 1850000 | 3515.3080   | 5704.9909  | 5900.2751   |           |
| 342.2101              | -15216.5556 | -1773.7173 | 0.0000      | 0.0000    |
| 8590.1942             | 7062.7054   | 320.4553   | -1527.4888  | 7129.7077 |
| 321.0174              | 157.5389    | 96.8668    | 664265.7895 | -17.4378  |
| -17.4450              |             |            |             |           |
| [3956]ENERGY: 1860000 | 3642.9791   | 5740.6116  | 5890.0811   |           |
| 356.7854              | -15279.9234 | -1786.7575 | 0.0000      | 0.0000    |
| 8506.2490             | 7070.0252   | 317.3238   | -1436.2238  | 7137.3528 |
| 320.7976              | 45.8658     | -35.3535   | 664265.7895 | -20.6162  |
| -20.5971              |             |            |             |           |
| [4006]ENERGY: 1870000 | 3644.7890   | 5791.7224  | 5864.7634   |           |
| 355.2268              | -15383.3134 | -1764.6827 | 0.0000      | 0.0000    |
| 8560.6777             | 7069.1832   | 319.3542   | -1491.4945  | 7135.8695 |
| 321.0046              | 29.2069     | -29.7735   | 664265.7895 | -20.2030  |
| -20.2174              |             |            |             |           |
| [4042]ENERGY: 1880000 | 3554.7070   | 5724.2863  | 5917.8285   |           |
| 351.3205              | -15242.0185 | -1840.2856 | 0.0000      | 0.0000    |
| 8600.6016             | 7066.4399   | 320.8436   | -1534.1618  | 7138.1031 |
| 320.8902              | -113.7618   | -131.6534  | 664265.7895 | -20.7617  |
| -20.7445              |             |            |             |           |
| [4092]ENERGY: 1890000 | 3540.9236   | 5772.1898  | 5852.1863   |           |
| 342.0886              | -15266.9948 | -1784.8423 | 0.0000      | 0.0000    |
| 8610.4511             | 7066.0022   | 321.2110   | -1544.4489  | 7137.7338 |
| 320.9587              | 12.8391     | -23.5590   | 664265.7895 | -20.3234  |
| -20.3235              |             |            |             |           |
| [4131]ENERGY: 1900000 | 3579.7381   | 5804.3430  | 5857.2177   |           |

## Supplementary Text 6

|                       |             |            |             |           |
|-----------------------|-------------|------------|-------------|-----------|
| 370.3299              | -15336.8533 | -1761.5790 | 0.0000      | 0.0000    |
| 8557.7530             | 7070.9492   | 319.2451   | -1486.8037  | 7136.1428 |
| 321.3285              | -86.0027    | -20.5398   | 664265.7895 | -24.1835  |
| -24.1820              |             |            |             |           |
| [4181]ENERGY: 1910000 | 3544.9520   | 5667.7862  | 5915.7637   |           |
| 390.8187              | -15302.3953 | -1815.2156 | 0.0000      | 0.0000    |
| 8667.3127             | 7069.0223   | 323.3322   | -1598.2904  | 7137.2686 |
| 321.7332              | 79.1529     | 12.9575    | 664265.7895 | -19.6344  |
| -19.6342              |             |            |             |           |
| [4217]ENERGY: 1920000 | 3536.9547   | 5699.7059  | 5853.8143   |           |
| 368.6976              | -15303.4930 | -1802.9679 | 0.0000      | 0.0000    |
| 8712.9974             | 7065.7090   | 325.0365   | -1647.2884  | 7136.8581 |
| 321.6571              | 123.5753    | 94.3713    | 664265.7895 | -18.8664  |
| -18.8778              |             |            |             |           |
| [4267]ENERGY: 1930000 | 3514.6106   | 5714.6918  | 5904.2631   |           |
| 383.7208              | -15255.8171 | -1763.4939 | 0.0000      | 0.0000    |
| 8570.3581             | 7068.3334   | 319.7154   | -1502.0247  | 7138.7888 |
| 321.7733              | 15.4487     | 11.1828    | 664265.7895 | -17.7119  |
| -17.7137              |             |            |             |           |
| [4303]ENERGY: 1940000 | 3575.1932   | 5747.9427  | 5933.0975   |           |
| 347.7090              | -15301.8469 | -1840.4962 | 0.0000      | 0.0000    |
| 8608.2010             | 7069.8004   | 321.1271   | -1538.4006  | 7138.3295 |
| 321.7670              | 97.6841     | -2.2737    | 664265.7895 | -17.6806  |
| -17.6710              |             |            |             |           |
| [4353]ENERGY: 1950000 | 3548.9027   | 5751.7761  | 5860.0521   |           |
| 351.7461              | -15168.2519 | -1884.3374 | 0.0000      | 0.0000    |
| 8609.3120             | 7069.1998   | 321.1685   | -1540.1122  | 7138.6095 |
| 321.7738              | -48.2513    | -121.3822  | 664265.7895 | -19.7105  |
| -19.7196              |             |            |             |           |
| [4389]ENERGY: 1960000 | 3614.5183   | 5729.2590  | 5855.2577   |           |
| 357.1529              | -15244.5695 | -1828.6512 | 0.0000      | 0.0000    |
| 8585.0535             | 7068.0207   | 320.2636   | -1517.0328  | 7138.7571 |
| 321.9434              | -14.2616    | -55.4968   | 664265.7895 | -18.5720  |
| -18.5694              |             |            |             |           |
| [4439]ENERGY: 1970000 | 3571.4645   | 5768.4593  | 5860.5260   |           |
| 337.2951              | -15378.3267 | -1773.4443 | 0.0000      | 0.0000    |
| 8682.9699             | 7068.9439   | 323.9163   | -1614.0260  | 7138.7150 |
| 322.1725              | 17.5115     | 54.5618    | 664265.7895 | -21.5969  |
| -21.5945              |             |            |             |           |
| [4475]ENERGY: 1980000 | 3552.7870   | 5804.0497  | 5926.6925   |           |
| 355.6712              | -15399.4172 | -1745.2817 | 0.0000      | 0.0000    |
| 8575.6679             | 7070.1695   | 319.9134   | -1505.4984  | 7138.5889 |
| 321.9278              | 101.1926    | 105.7105   | 664265.7895 | -19.6178  |
| -19.6066              |             |            |             |           |
| [4525]ENERGY: 1990000 | 3553.2714   | 5667.3171  | 5890.0727   |           |
| 361.5728              | -15266.5307 | -1772.3105 | 0.0000      | 0.0000    |
| 8636.8400             | 7070.2330   | 322.1955   | -1566.6071  | 7137.6714 |
| 321.9946              | -82.5980    | -75.7442   | 664265.7895 | -23.9068  |
| -23.9277              |             |            |             |           |
| [4564]ENERGY: 2000000 | 3491.0399   | 5779.1320  | 5898.5485   |           |
| 375.2215              | -15246.1816 | -1906.2353 | 0.0000      | 0.0000    |
| 8677.9368             | 7069.4619   | 323.7286   | -1608.4749  | 7139.2229 |
| 322.1122              | -20.7182    | -19.5589   | 664265.7895 | -17.2602  |
| -17.2412              |             |            |             |           |

## Supplementary Text 6

|                       |             |            |             |           |
|-----------------------|-------------|------------|-------------|-----------|
| [4614]ENERGY: 2010000 | 3535.5320   | 5738.4869  | 5924.3877   |           |
| 390.7110              | -15301.1927 | -1876.4113 | 0.0000      | 0.0000    |
| 8660.2508             | 7071.7643   | 323.0688   | -1588.4864  | 7140.0552 |
| 321.7860              | 4.2832      | -43.5940   | 664265.7895 | -19.2526  |
| -19.2466              |             |            |             |           |
| [4650]ENERGY: 2020000 | 3479.4844   | 5715.6702  | 5908.1341   |           |
| 351.9176              | -15252.6863 | -1943.2581 | 0.0000      | 0.0000    |
| 8806.8831             | 7066.1449   | 328.5389   | -1740.7381  | 7141.5186 |
| 321.9165              | -13.5204    | -86.1575   | 664265.7895 | -19.0974  |
| -19.1224              |             |            |             |           |
| [4700]ENERGY: 2030000 | 3524.9122   | 5774.0348  | 5925.2775   |           |
| 356.9382              | -15308.3201 | -1887.1825 | 0.0000      | 0.0000    |
| 8683.6191             | 7069.2793   | 323.9405   | -1614.3399  | 7141.2017 |
| 322.0708              | -70.4117    | -79.7124   | 664265.7895 | -20.6885  |
| -20.6743              |             |            |             |           |
| [4736]ENERGY: 2040000 | 3549.4555   | 5760.7878  | 5895.9742   |           |
| 365.4635              | -15195.9830 | -1785.4497 | 0.0000      | 0.0000    |
| 8484.6509             | 7074.8992   | 316.5181   | -1409.7517  | 7142.2709 |
| 321.7754              | -23.2608    | 14.4460    | 664265.7895 | -17.6311  |
| -17.6453              |             |            |             |           |
| [4786]ENERGY: 2050000 | 3550.9264   | 5810.8036  | 5982.6864   |           |
| 343.1244              | -15327.7549 | -1856.0238 | 0.0000      | 0.0000    |
| 8569.5054             | 7073.2676   | 319.6836   | -1496.2378  | 7140.8783 |
| 322.0249              | 63.7656     | -8.1664    | 664265.7895 | -14.9185  |
| -14.9138              |             |            |             |           |
| [4822]ENERGY: 2060000 | 3569.4139   | 5816.6203  | 5994.9509   |           |
| 379.8467              | -15365.9028 | -1803.9836 | 0.0000      | 0.0000    |
| 8485.9683             | 7076.9137   | 316.5672   | -1409.0546  | 7142.0284 |
| 321.9530              | 130.1527    | 70.3092    | 664265.7895 | -12.3667  |
| -12.3719              |             |            |             |           |
| [4872]ENERGY: 2070000 | 3484.2434   | 5786.6766  | 5892.1601   |           |
| 359.1687              | -15317.5261 | -1841.8265 | 0.0000      | 0.0000    |
| 8709.2138             | 7072.1099   | 324.8953   | -1637.1038  | 7141.7236 |
| 322.1464              | -24.2822    | -54.9627   | 664265.7895 | -9.7433   |
| -9.7366               |             |            |             |           |
| [4908]ENERGY: 2080000 | 3510.9463   | 5672.2698  | 5899.6486   |           |
| 360.7632              | -15198.9237 | -1813.5085 | 0.0000      | 0.0000    |
| 8639.2852             | 7070.4808   | 322.2867   | -1568.8043  | 7142.2886 |
| 322.3692              | 122.2162    | 42.4251    | 664265.7895 | -15.8579  |
| -15.8556              |             |            |             |           |
| [4958]ENERGY: 2090000 | 3546.2478   | 5766.3004  | 5930.9156   |           |
| 379.4140              | -15316.0220 | -1831.7172 | 0.0000      | 0.0000    |
| 8600.2517             | 7075.3902   | 320.8305   | -1524.8615  | 7142.5464 |
| 322.1362              | -62.3721    | -50.0295   | 664265.7895 | -9.4167   |
| -9.4036               |             |            |             |           |
| [4997]ENERGY: 2100000 | 3514.7100   | 5769.7202  | 5867.6422   |           |
| 337.9216              | -15231.9614 | -1875.8224 | 0.0000      | 0.0000    |
| 8688.3708             | 7070.5811   | 324.1178   | -1617.7898  | 7142.0126 |
| 322.0192              | 51.4719     | -50.4641   | 664265.7895 | -11.7831  |
| -11.7969              |             |            |             |           |
| [5047]ENERGY: 2110000 | 3531.1515   | 5801.9748  | 5843.6574   |           |
| 343.6973              | -15302.2628 | -1828.2457 | 0.0000      | 0.0000    |
| 8679.7906             | 7069.7632   | 323.7977   | -1610.0275  | 7141.6300 |
| 322.3093              | 103.8527    | 53.6366    | 664265.7895 | -12.7766  |

## Supplementary Text 6

-12.7791  
[5083]ENERGY: 2120000      3559.6266      5742.1567      5883.9183  
354.0508      -15357.6479      -1831.2564      0.0000      0.0000  
8719.7813      7070.6294      325.2896      -1649.1519      7141.9752  
322.5334      -27.3822      -85.7975      664265.7895      -7.3739  
-7.3678  
[5133]ENERGY: 2130000      3603.2348      5770.3651      5869.1604  
376.5730      -15336.4893      -1794.3683      0.0000      0.0000  
8582.1324      7070.6081      320.1546      -1511.5243      7140.0234  
322.5065      50.9411      64.6332      664265.7895      -9.2739  
-9.2855  
[5169]ENERGY: 2140000      3514.1505      5792.6904      5865.8883  
326.6960      -15251.7867      -1833.1277      0.0000      0.0000  
8658.5258      7073.0366      323.0044      -1585.4891      7142.2533  
322.5625      168.1621      151.0764      664265.7895      -5.8980  
-5.8945  
[5219]ENERGY: 2150000      3535.8962      5844.2683      5930.6256  
359.1495      -15366.5638      -1836.8236      0.0000      0.0000  
8603.8729      7070.4252      320.9656      -1533.4477      7141.8073  
322.6224      41.1765      12.8018      664265.7895      -11.9775  
-11.9772  
[5255]ENERGY: 2160000      3585.4177      5798.2838      5922.7715  
355.9203      -15362.3728      -1830.3522      0.0000      0.0000  
8602.7734      7072.4417      320.9246      -1530.3317      7142.2556  
322.7256      44.8106      115.3353      664265.7895      -11.4883  
-11.4698  
[5305]ENERGY: 2170000      3564.9158      5792.0942      5911.5633  
361.2896      -15352.0898      -1781.4447      0.0000      0.0000  
8579.4141      7075.7426      320.0532      -1503.6716      7141.7870  
322.6563      -8.3410      -25.0713      664265.7895      -12.0351  
-12.0413  
[5341]ENERGY: 2180000      3501.2643      5781.0418      5865.8597  
376.3443      -15304.9279      -1802.8037      0.0000      0.0000  
8654.0835      7070.8620      322.8387      -1583.2216      7141.8360  
322.7339      150.9758      34.4981      664265.7895      -10.0360  
-10.0471  
[5391]ENERGY: 2190000      3512.0948      5904.7039      5880.3484  
373.4913      -15352.5590      -1833.6505      0.0000      0.0000  
8587.4106      7071.8395      320.3515      -1515.5711      7142.4886  
322.7051      -126.3361      -117.2109      664265.7895      -10.7149  
-10.7127  
[5430]ENERGY: 2200000      3597.9321      5719.1059      5910.5386  
355.2131      -15237.2851      -1881.1541      0.0000      0.0000  
8610.9413      7075.2917      321.2293      -1535.6496      7143.3649  
322.5422      -204.6709      -123.8520      664265.7895      -13.0212  
-13.0106  
[5480]ENERGY: 2210000      3595.5159      5744.2006      5918.5423  
350.6837      -15316.6657      -1803.7736      0.0000      0.0000  
8587.7366      7076.2397      320.3637      -1511.4969      7141.7411  
322.5588      39.8617      52.8217      664265.7895      -13.7870  
-13.8081  
[5516]ENERGY: 2220000      3581.7055      5681.3398      5932.7085  
357.0865      -15241.4017      -1803.2189      0.0000      0.0000  
8567.0375      7075.2573      319.5915      -1491.7803      7141.6350

Supplementary Text 6

|                       |             |            |             |           |
|-----------------------|-------------|------------|-------------|-----------|
| 322.5047              | -20.1337    | -35.4608   | 664265.7895 | -13.7064  |
| -13.6965              |             |            |             |           |
| [5566]ENERGY: 2230000 | 3457.7666   | 5899.4150  | 5885.6214   |           |
| 360.7392              | -15233.8363 | -1872.5368 | 0.0000      | 0.0000    |
| 8575.6012             | 7072.7703   | 319.9110   | -1502.8309  | 7143.0851 |
| 322.3400              | -135.3248   | -82.2538   | 664265.7895 | -15.8307  |
| -15.8177              |             |            |             |           |
| [5602]ENERGY: 2240000 | 3446.3232   | 5851.4476  | 5928.8868   |           |
| 387.3443              | -15284.2802 | -1867.3085 | 0.0000      | 0.0000    |
| 8612.7011             | 7075.1142   | 321.2950   | -1537.5869  | 7143.5878 |
| 322.3895              | 44.7967     | 89.6688    | 664265.7895 | -12.6047  |
| -12.6107              |             |            |             |           |
| [5652]ENERGY: 2250000 | 3534.5439   | 5704.5087  | 5941.9054   |           |
| 348.8570              | -15337.2183 | -1791.2575 | 0.0000      | 0.0000    |
| 8671.7059             | 7073.0450   | 323.4961   | -1598.6608  | 7142.3756 |
| 322.5530              | 111.6971    | 62.2636    | 664265.7895 | -15.3640  |
| -15.3744              |             |            |             |           |
| [5688]ENERGY: 2260000 | 3536.1869   | 5768.2512  | 5922.6429   |           |
| 358.1238              | -15279.9173 | -1882.7462 | 0.0000      | 0.0000    |
| 8653.5679             | 7076.1094   | 322.8195   | -1577.4585  | 7143.2110 |
| 322.5874              | -145.3270   | -126.0847  | 664265.7895 | -11.2491  |
| -11.2439              |             |            |             |           |
| [5738]ENERGY: 2270000 | 3556.0374   | 5857.8220  | 5930.4400   |           |
| 361.8937              | -15425.6381 | -1767.1402 | 0.0000      | 0.0000    |
| 8562.0329             | 7075.4478   | 319.4048   | -1486.5852  | 7144.0103 |
| 322.5849              | 104.0690    | 20.2120    | 664265.7895 | -15.5956  |
| -15.5928              |             |            |             |           |
| [5774]ENERGY: 2280000 | 3526.6858   | 5803.8885  | 5919.0113   |           |
| 382.2429              | -15327.9998 | -1810.4190 | 0.0000      | 0.0000    |
| 8585.0640             | 7078.4737   | 320.2640   | -1506.5903  | 7145.1517 |
| 322.5588              | -15.6975    | -58.2367   | 664265.7895 | -12.9643  |
| -12.9655              |             |            |             |           |
| [5824]ENERGY: 2290000 | 3476.6880   | 5787.2658  | 5877.2625   |           |
| 385.9672              | -15297.0865 | -1786.4877 | 0.0000      | 0.0000    |
| 8631.1793             | 7074.7885   | 321.9843   | -1556.3908  | 7145.5123 |
| 322.4567              | 195.7629    | 164.9340   | 664265.7895 | -15.6962  |
| -15.6806              |             |            |             |           |
| [5863]ENERGY: 2300000 | 3474.0434   | 5748.0276  | 5904.5171   |           |
| 376.0372              | -15254.4891 | -1859.0079 | 0.0000      | 0.0000    |
| 8688.1785             | 7077.3069   | 324.1106   | -1610.8717  | 7146.3950 |
| 322.4145              | -23.0258    | -34.4106   | 664265.7895 | -10.9751  |
| -11.0003              |             |            |             |           |
| [5913]ENERGY: 2310000 | 3549.6984   | 5690.9150  | 5940.3414   |           |
| 377.7863              | -15350.3854 | -1805.9312 | 0.0000      | 0.0000    |
| 8674.7356             | 7077.1601   | 323.6091   | -1597.5754  | 7147.0799 |
| 322.4319              | 165.6932    | 101.2325   | 664265.7895 | -9.8493   |
| -9.8511               |             |            |             |           |
| [5949]ENERGY: 2320000 | 3463.8906   | 5883.7617  | 5882.3792   |           |
| 342.1725              | -15310.8870 | -1878.5664 | 0.0000      | 0.0000    |
| 8693.1132             | 7075.8639   | 324.2947   | -1617.2493  | 7146.9632 |
| 322.3756              | -30.9121    | -55.0295   | 664265.7895 | -11.5764  |
| -11.5814              |             |            |             |           |
| [5999]ENERGY: 2330000 | 3595.6495   | 5860.8236  | 5941.4837   |           |
| 361.8429              | -15375.3642 | -1784.2816 | 0.0000      | 0.0000    |

## Supplementary Text 6

|                       |             |            |             |           |
|-----------------------|-------------|------------|-------------|-----------|
| 8478.8205             | 7078.9743   | 316.3006   | -1399.8462  | 7145.5897 |
| 322.4518              | 67.2164     | 17.0546    | 664265.7895 | -14.4726  |
| -14.4621              |             |            |             |           |
| [6035]ENERGY: 2340000 | 3480.4426   | 5737.0114  | 5898.9237   |           |
| 370.6019              | -15242.0978 | -1857.0644 | 0.0000      | 0.0000    |
| 8686.0186             | 7073.8361   | 324.0301   | -1612.1826  | 7146.5422 |
| 322.4604              | -49.2022    | -27.9823   | 664265.7895 | -15.4813  |
| -15.4624              |             |            |             |           |
| [6085]ENERGY: 2350000 | 3469.7188   | 5697.4864  | 5855.2164   |           |
| 328.8566              | -15243.1410 | -1737.2333 | 0.0000      | 0.0000    |
| 8705.1858             | 7076.0896   | 324.7451   | -1629.0962  | 7146.7318 |
| 322.6726              | 90.4328     | 53.8621    | 664265.7895 | -20.6148  |
| -20.6439              |             |            |             |           |
| [6121]ENERGY: 2360000 | 3503.6429   | 5756.7516  | 5970.6691   |           |
| 375.3012              | -15304.9062 | -1851.9967 | 0.0000      | 0.0000    |
| 8628.8885             | 7078.3504   | 321.8988   | -1550.5381  | 7146.7121 |
| 322.5610              | 114.5278    | 160.5414   | 664265.7895 | -18.7316  |
| -18.7202              |             |            |             |           |
| [6171]ENERGY: 2370000 | 3559.9238   | 5710.6363  | 5946.4017   |           |
| 374.1081              | -15188.4520 | -1881.2464 | 0.0000      | 0.0000    |
| 8561.3470             | 7082.7185   | 319.3792   | -1478.6285  | 7147.3257 |
| 322.4706              | -195.5355   | -176.9319  | 664265.7895 | -17.4291  |
| -17.4240              |             |            |             |           |
| [6207]ENERGY: 2380000 | 3518.9092   | 5607.0707  | 5951.2599   |           |
| 339.1406              | -15255.7047 | -1860.2161 | 0.0000      | 0.0000    |
| 8774.8246             | 7075.2843   | 327.3429   | -1699.5404  | 7148.2371 |
| 322.6236              | -87.7240    | -77.9178   | 664265.7895 | -14.8343  |
| -14.8140              |             |            |             |           |
| [6257]ENERGY: 2390000 | 3531.2487   | 5819.4623  | 5892.4492   |           |
| 364.1224              | -15382.5920 | -1859.0964 | 0.0000      | 0.0000    |
| 8711.8332             | 7077.4273   | 324.9931   | -1634.4058  | 7148.1886 |
| 322.5885              | 38.6202     | 7.6854     | 664265.7895 | -8.7536   |
| -8.7815               |             |            |             |           |
| [6296]ENERGY: 2400000 | 3633.4618   | 5734.2903  | 5930.6116   |           |
| 355.6751              | -15433.7562 | -1793.2365 | 0.0000      | 0.0000    |
| 8655.0989             | 7082.1449   | 322.8766   | -1572.9539  | 7147.5471 |
| 322.6678              | -79.9643    | -112.4902  | 664265.7895 | -13.0246  |
| -13.0110              |             |            |             |           |
| [6346]ENERGY: 2410000 | 3493.5693   | 5699.3607  | 5898.6536   |           |
| 352.3204              | -15321.5153 | -1720.1157 | 0.0000      | 0.0000    |
| 8678.2651             | 7080.5382   | 323.7408   | -1597.7270  | 7147.5116 |
| 322.5567              | 30.3805     | 43.5002    | 664265.7895 | -3.2945   |
| -3.3047               |             |            |             |           |
| [6382]ENERGY: 2420000 | 3444.2583   | 5688.2321  | 5913.1838   |           |
| 364.1471              | -15189.0802 | -1824.3571 | 0.0000      | 0.0000    |
| 8680.6919             | 7077.0759   | 323.8313   | -1603.6161  | 7147.8786 |
| 322.6218              | 264.9288    | 184.7593   | 664265.7895 | -6.4107   |
| -6.4124               |             |            |             |           |
| [6432]ENERGY: 2430000 | 3595.5593   | 5794.2278  | 5936.2096   |           |
| 360.1667              | -15396.4632 | -1831.2045 | 0.0000      | 0.0000    |
| 8619.2429             | 7077.7385   | 321.5390   | -1541.5044  | 7147.2357 |
| 322.9440              | -34.0515    | 117.7727   | 664265.7895 | -0.6410   |
| -0.6146               |             |            |             |           |
| [6468]ENERGY: 2440000 | 3539.1152   | 5757.2410  | 5858.9427   |           |



## Supplementary Text 6

|                       |             |            |             |           |
|-----------------------|-------------|------------|-------------|-----------|
| 350.9174              | -15418.3227 | -1759.8075 | 0.0000      | 0.0000    |
| 8750.4634             | 7078.5496   | 326.4342   | -1671.9138  | 7147.8216 |
| 323.0687              | -5.2957     | 52.6081    | 664265.7895 | -3.4082   |
| -3.4151               |             |            |             |           |
| [6518]ENERGY: 2450000 | 3592.7935   | 5908.6566  | 5883.6811   |           |
| 357.4330              | -15345.9709 | -1872.8831 | 0.0000      | 0.0000    |
| 8558.6347             | 7082.3448   | 319.2780   | -1476.2899  | 7149.3956 |
| 323.0382              | 72.7014     | 9.6706     | 664265.7895 | 1.6616    |
| 1.6477                |             |            |             |           |
| [6554]ENERGY: 2460000 | 3495.8189   | 5834.9847  | 5873.2460   |           |
| 383.5204              | -15321.8445 | -1894.7946 | 0.0000      | 0.0000    |
| 8711.1291             | 7082.0600   | 324.9668   | -1629.0691  | 7149.5377 |
| 322.9277              | -136.8502   | -100.7458  | 664265.7895 | -2.4721   |
| -2.4648               |             |            |             |           |
| [6604]ENERGY: 2470000 | 3494.7656   | 5848.6591  | 5919.0952   |           |
| 375.9658              | -15346.2421 | -1861.5492 | 0.0000      | 0.0000    |
| 8649.6348             | 7080.3293   | 322.6728   | -1569.3055  | 7149.9134 |
| 323.0305              | 82.6289     | 70.3645    | 664265.7895 | -1.7212   |
| -1.7342               |             |            |             |           |
| [6640]ENERGY: 2480000 | 3511.1017   | 5787.7003  | 5927.8296   |           |
| 356.2559              | -15398.6159 | -1779.8592 | 0.0000      | 0.0000    |
| 8672.6371             | 7077.0494   | 323.5309   | -1595.5877  | 7150.3216 |
| 323.1217              | 172.1248    | 171.6337   | 664265.7895 | 2.8200    |
| 2.8164                |             |            |             |           |
| [6690]ENERGY: 2490000 | 3514.6078   | 5688.5326  | 5941.6849   |           |
| 367.0679              | -15284.9135 | -1794.1618 | 0.0000      | 0.0000    |
| 8645.5971             | 7078.4151   | 322.5221   | -1567.1821  | 7151.1799 |
| 322.9407              | 84.1556     | 147.3420   | 664265.7895 | -1.2225   |
| -1.2164               |             |            |             |           |
| [6729]ENERGY: 2500000 | 3560.4506   | 5847.4570  | 5932.5751   |           |
| 389.4061              | -15381.4995 | -1886.4686 | 0.0000      | 0.0000    |
| 8618.7014             | 7080.6222   | 321.5188   | -1538.0792  | 7151.5221 |
| 322.9367              | 38.7263     | -10.2217   | 664265.7895 | -3.8841   |
| -3.8778               |             |            |             |           |
| [6779]ENERGY: 2510000 | 3551.9940   | 5734.9667  | 5909.9396   |           |
| 362.4040              | -15380.5774 | -1755.6907 | 0.0000      | 0.0000    |
| 8657.9240             | 7080.9602   | 322.9820   | -1576.9638  | 7152.4895 |
| 323.0189              | 27.2915     | 7.6058     | 664265.7895 | -1.5648   |
| -1.5722               |             |            |             |           |
| [6815]ENERGY: 2520000 | 3506.8105   | 5847.1780  | 5900.3521   |           |
| 323.2676              | -15319.0682 | -1862.5813 | 0.0000      | 0.0000    |
| 8683.0127             | 7078.9713   | 323.9179   | -1604.0414  | 7151.3754 |
| 322.9974              | 12.1805     | 59.8880    | 664265.7895 | 0.8511    |
| 0.8614                |             |            |             |           |
| [6865]ENERGY: 2530000 | 3552.8940   | 5834.0823  | 5905.9122   |           |
| 372.9474              | -15315.6323 | -1854.5856 | 0.0000      | 0.0000    |
| 8590.0106             | 7085.6287   | 320.4485   | -1504.3819  | 7153.2643 |
| 323.0638              | 53.7666     | 29.2711    | 664265.7895 | -2.0497   |
| -2.0598               |             |            |             |           |
| [6901]ENERGY: 2540000 | 3485.9250   | 5856.0714  | 5882.7700   |           |
| 349.6692              | -15369.1176 | -1762.6472 | 0.0000      | 0.0000    |
| 8640.8709             | 7083.5418   | 322.3458   | -1557.3291  | 7153.0501 |
| 323.0392              | 10.4604     | 38.8528    | 664265.7895 | -2.7421   |
| -2.7352               |             |            |             |           |

## Supplementary Text 6

|                       |             |            |             |           |
|-----------------------|-------------|------------|-------------|-----------|
| [6951]ENERGY: 2550000 | 3603.0643   | 5786.9405  | 5906.8061   |           |
| 362.4698              | -15344.6611 | -1866.5413 | 0.0000      | 0.0000    |
| 8637.1663             | 7085.2446   | 322.2076   | -1551.9217  | 7152.9467 |
| 323.1047              | -138.3121   | -134.2258  | 664265.7895 | -1.8495   |
| -1.8487               |             |            |             |           |
| [6987]ENERGY: 2560000 | 3526.5826   | 5728.3898  | 5915.3937   |           |
| 365.4975              | -15339.3569 | -1846.8253 | 0.0000      | 0.0000    |
| 8729.3291             | 7079.0104   | 325.6457   | -1650.3187  | 7152.6774 |
| 323.0120              | 3.6731      | -13.8023   | 664265.7895 | -5.7326   |
| -5.7328               |             |            |             |           |
| [7037]ENERGY: 2570000 | 3554.4398   | 5734.6995  | 5880.2795   |           |
| 346.2919              | -15293.6516 | -1838.6576 | 0.0000      | 0.0000    |
| 8696.6381             | 7080.0395   | 324.4262   | -1616.5986  | 7152.0781 |
| 323.0839              | -56.3132    | -6.5146    | 664265.7895 | -8.3351   |
| -8.3307               |             |            |             |           |
| [7073]ENERGY: 2580000 | 3603.7969   | 5793.9448  | 5889.3313   |           |
| 363.7158              | -15295.0359 | -1861.2486 | 0.0000      | 0.0000    |
| 8593.4948             | 7087.9992   | 320.5785   | -1505.4957  | 7153.1517 |
| 323.1285              | -11.2577    | -12.1696   | 664265.7895 | -1.0160   |
| -1.0334               |             |            |             |           |
| [7123]ENERGY: 2590000 | 3520.2874   | 5761.0121  | 5887.6481   |           |
| 367.7160              | -15329.4430 | -1774.5904 | 0.0000      | 0.0000    |
| 8654.6383             | 7087.2684   | 322.8594   | -1567.3699  | 7153.2924 |
| 323.3006              | 201.5289    | 211.8551   | 664265.7895 | -3.2604   |
| -3.2537               |             |            |             |           |
| [7162]ENERGY: 2600000 | 3596.3854   | 5803.4705  | 5945.3572   |           |
| 376.5700              | -15302.8122 | -1922.5624 | 0.0000      | 0.0000    |
| 8591.5838             | 7087.9922   | 320.5072   | -1503.5916  | 7154.2563 |
| 323.3791              | -152.6569   | -207.3993  | 664265.7895 | -4.8590   |
| -4.8589               |             |            |             |           |
| [7212]ENERGY: 2610000 | 3525.3549   | 5772.7696  | 5945.8981   |           |
| 370.7785              | -15299.5266 | -1866.2368 | 0.0000      | 0.0000    |
| 8634.6806             | 7083.7183   | 322.1149   | -1550.9623  | 7153.8731 |
| 323.2216              | -21.7304    | -16.0251   | 664265.7895 | 0.7960    |
| 0.8036                |             |            |             |           |
| [7248]ENERGY: 2620000 | 3565.1642   | 5726.7393  | 5945.2430   |           |
| 365.1905              | -15345.5070 | -1856.8037 | 0.0000      | 0.0000    |
| 8681.5624             | 7081.5887   | 323.8638   | -1599.9737  | 7156.7032 |
| 323.2679              | 2.3533      | -2.7279    | 664265.7895 | 1.6516    |
| 1.6462                |             |            |             |           |
| [7298]ENERGY: 2630000 | 3608.0616   | 5839.4420  | 5827.7512   |           |
| 368.3787              | -15461.2312 | -1750.9914 | 0.0000      | 0.0000    |
| 8652.9655             | 7084.3763   | 322.7970   | -1568.5891  | 7155.2932 |
| 323.4108              | -19.3593    | 8.3873     | 664265.7895 | -0.0449   |
| -0.0394               |             |            |             |           |
| [7334]ENERGY: 2640000 | 3465.0268   | 5717.5926  | 5936.4033   |           |
| 359.1940              | -15292.7856 | -1819.6771 | 0.0000      | 0.0000    |
| 8720.4033             | 7086.1573   | 325.3128   | -1634.2460  | 7156.2951 |
| 323.3916              | 90.5704     | 30.7020    | 664265.7895 | 1.2293    |
| 1.2198                |             |            |             |           |
| [7384]ENERGY: 2650000 | 3599.6444   | 5732.4216  | 5918.2016   |           |
| 366.4366              | -15336.3079 | -1874.5313 | 0.0000      | 0.0000    |
| 8679.0656             | 7084.9306   | 323.7707   | -1594.1349  | 7157.5073 |
| 323.5966              | 88.0228     | -83.9018   | 664265.7895 | -0.3812   |

## Supplementary Text 6

-0.3770

|                       |             |            |             |           |
|-----------------------|-------------|------------|-------------|-----------|
| [7420]ENERGY: 2660000 | 3477.0477   | 5820.8976  | 5936.8264   |           |
| 366.2958              | -15279.3754 | -1816.0732 | 0.0000      | 0.0000    |
| 8581.6296             | 7087.2484   | 320.1358   | -1494.3812  | 7158.2007 |
| 323.4809              | -78.7321    | -33.4208   | 664265.7895 | -2.0219   |

-2.0101

|                       |             |            |             |           |
|-----------------------|-------------|------------|-------------|-----------|
| [7470]ENERGY: 2670000 | 3532.7579   | 5710.5652  | 5891.2463   |           |
| 353.6004              | -15311.1399 | -1789.2658 | 0.0000      | 0.0000    |
| 8698.6139             | 7086.3780   | 324.4999   | -1612.2359  | 7157.6916 |
| 323.4335              | -8.7520     | 42.0295    | 664265.7895 | 3.3379    |

3.3274

|                       |             |            |             |           |
|-----------------------|-------------|------------|-------------|-----------|
| [7506]ENERGY: 2680000 | 3499.8892   | 5770.5605  | 5937.3603   |           |
| 350.0922              | -15303.2808 | -1829.5772 | 0.0000      | 0.0000    |
| 8663.5344             | 7088.5787   | 323.1913   | -1574.9558  | 7159.3805 |
| 323.3243              | 174.9013    | 79.4573    | 664265.7895 | 1.3113    |

1.3102

|                       |             |            |             |           |
|-----------------------|-------------|------------|-------------|-----------|
| [7556]ENERGY: 2690000 | 3463.4402   | 5766.8418  | 5926.2306   |           |
| 380.3825              | -15407.3989 | -1712.1257 | 0.0000      | 0.0000    |
| 8668.7665             | 7086.1370   | 323.3865   | -1582.6295  | 7158.2559 |
| 323.5614              | 290.5287    | 197.5396   | 664265.7895 | 3.9877    |

3.9770

|                       |             |            |             |           |
|-----------------------|-------------|------------|-------------|-----------|
| [7595]ENERGY: 2700000 | 3638.7077   | 5808.7312  | 5878.6213   |           |
| 378.5793              | -15444.9315 | -1829.7320 | 0.0000      | 0.0000    |
| 8660.2115             | 7090.1875   | 323.0673   | -1570.0240  | 7159.4300 |
| 323.7622              | 221.0284    | 186.7824   | 664265.7895 | 1.4252    |

1.4220

|                       |             |            |             |           |
|-----------------------|-------------|------------|-------------|-----------|
| [7645]ENERGY: 2710000 | 3664.3235   | 5719.8784  | 5949.8340   |           |
| 382.0614              | -15480.0610 | -1785.5184 | 0.0000      | 0.0000    |
| 8638.9605             | 7089.4783   | 322.2746   | -1549.4822  | 7159.2522 |
| 323.4992              | 22.0890     | -40.8203   | 664265.7895 | 3.3175    |

3.3341

|                       |             |            |             |           |
|-----------------------|-------------|------------|-------------|-----------|
| [7681]ENERGY: 2720000 | 3577.0278   | 5797.4675  | 5896.5259   |           |
| 367.1002              | -15356.1269 | -1885.4287 | 0.0000      | 0.0000    |
| 8692.6546             | 7089.2203   | 324.2776   | -1603.4342  | 7160.3965 |
| 323.5683              | -55.3861    | -119.3545  | 664265.7895 | -2.2397   |

-2.2421

|                       |             |            |             |           |
|-----------------------|-------------|------------|-------------|-----------|
| [7731]ENERGY: 2730000 | 3548.6411   | 5756.5025  | 5928.5041   |           |
| 389.4361              | -15368.5230 | -1838.9849 | 0.0000      | 0.0000    |
| 8674.7101             | 7090.2858   | 323.6082   | -1584.4242  | 7160.4236 |
| 323.5938              | 129.9785    | 94.7709    | 664265.7895 | -0.4097   |

-0.4062

|                       |             |            |             |           |
|-----------------------|-------------|------------|-------------|-----------|
| [7767]ENERGY: 2740000 | 3537.4673   | 5753.2114  | 5945.7807   |           |
| 376.2916              | -15407.8138 | -1789.6469 | 0.0000      | 0.0000    |
| 8677.3993             | 7092.6895   | 323.7085   | -1584.7098  | 7161.0002 |
| 323.5169              | 170.7761    | 105.5756   | 664265.7895 | -0.1606   |

-0.1609

|                       |             |            |             |           |
|-----------------------|-------------|------------|-------------|-----------|
| [7817]ENERGY: 2750000 | 3553.2221   | 5734.6051  | 5969.7125   |           |
| 388.5370              | -15383.8024 | -1864.6693 | 0.0000      | 0.0000    |
| 8693.2389             | 7090.8439   | 324.2994   | -1602.3950  | 7161.5508 |
| 323.5479              | 72.0111     | -13.0146   | 664265.7895 | 0.0846    |

0.0815

|                       |             |            |            |           |
|-----------------------|-------------|------------|------------|-----------|
| [7853]ENERGY: 2760000 | 3582.0189   | 5693.4341  | 5924.0564  |           |
| 355.9392              | -15345.4034 | -1740.7917 | 0.0000     | 0.0000    |
| 8624.8704             | 7094.1241   | 321.7489   | -1530.7464 | 7161.7365 |

## Supplementary Text 6

|                       |             |            |             |           |
|-----------------------|-------------|------------|-------------|-----------|
| 323.4910              | 55.3591     | 99.9185    | 664265.7895 | 1.2142    |
| 1.2268                |             |            |             |           |
| [7903]ENERGY: 2770000 | 3523.7877   | 5776.9999  | 5901.8521   |           |
| 345.7854              | -15356.2597 | -1818.9978 | 0.0000      | 0.0000    |
| 8719.4810             | 7092.6486   | 325.2784   | -1626.8324  | 7160.6313 |
| 323.4236              | 54.6446     | 10.9887    | 664265.7895 | -2.4038   |
| -2.4025               |             |            |             |           |
| [7939]ENERGY: 2780000 | 3531.0850   | 5821.7628  | 5925.6032   |           |
| 358.0782              | -15322.1045 | -1828.1636 | 0.0000      | 0.0000    |
| 8607.0174             | 7093.2786   | 321.0829   | -1513.7388  | 7160.6882 |
| 323.4116              | 57.5346     | -5.0731    | 664265.7895 | 0.7199    |
| 0.6819                |             |            |             |           |
| [7989]ENERGY: 2790000 | 3602.5334   | 5859.0840  | 5942.1661   |           |
| 368.3792              | -15435.6916 | -1824.3044 | 0.0000      | 0.0000    |
| 8582.1460             | 7094.3128   | 320.1551   | -1487.8332  | 7161.2508 |
| 323.4221              | -6.9662     | -11.5963   | 664265.7895 | -2.4861   |
| -2.4574               |             |            |             |           |
| [8028]ENERGY: 2800000 | 3609.6996   | 5763.0647  | 5944.5700   |           |
| 360.3837              | -15343.4601 | -1874.9283 | 0.0000      | 0.0000    |
| 8634.5578             | 7093.8873   | 322.1103   | -1540.6704  | 7160.6478 |
| 323.6376              | -32.1619    | -14.1151   | 664265.7895 | -1.3699   |
| -1.3799               |             |            |             |           |
| [8078]ENERGY: 2810000 | 3619.2238   | 5762.2529  | 5927.2091   |           |
| 360.4306              | -15403.6417 | -1798.7319 | 0.0000      | 0.0000    |
| 8628.5316             | 7095.2745   | 321.8855   | -1533.2572  | 7161.0126 |
| 323.7695              | 76.9355     | 144.1306   | 664265.7895 | -0.1585   |
| -0.1438               |             |            |             |           |
| [8114]ENERGY: 2820000 | 3562.1568   | 5795.7347  | 5949.5453   |           |
| 352.6038              | -15318.5531 | -1888.9827 | 0.0000      | 0.0000    |
| 8643.6117             | 7096.1165   | 322.4481   | -1547.4953  | 7161.7046 |
| 323.7051              | -110.0422   | -49.2501   | 664265.7895 | 3.1422    |
| 3.1452                |             |            |             |           |
| [8164]ENERGY: 2830000 | 3536.3926   | 5818.5344  | 5876.6320   |           |
| 355.3154              | -15322.9015 | -1797.3907 | 0.0000      | 0.0000    |
| 8624.0802             | 7090.6623   | 321.7195   | -1533.4179  | 7160.3026 |
| 323.7648              | 142.9877    | 113.8901   | 664265.7895 | 0.5268    |
| 0.5040                |             |            |             |           |
| [8200]ENERGY: 2840000 | 3571.3825   | 5688.6481  | 5919.7258   |           |
| 361.5537              | -15317.2484 | -1880.1662 | 0.0000      | 0.0000    |
| 8744.4761             | 7088.3718   | 326.2108   | -1656.1043  | 7162.7417 |
| 323.5923              | -32.5954    | -141.7161  | 664265.7895 | -0.5523   |
| -0.5393               |             |            |             |           |
| [8250]ENERGY: 2850000 | 3625.8224   | 5730.5363  | 5932.2116   |           |
| 343.3048              | -15372.3433 | -1836.3519 | 0.0000      | 0.0000    |
| 8668.8917             | 7092.0714   | 323.3911   | -1576.8202  | 7164.3537 |
| 323.8292              | -50.3291    | -132.9972  | 664265.7895 | 0.6918    |
| 0.7010                |             |            |             |           |
| [8286]ENERGY: 2860000 | 3626.7479   | 5715.9766  | 5906.7210   |           |
| 354.2179              | -15412.1249 | -1798.3723 | 0.0000      | 0.0000    |
| 8700.8549             | 7094.0211   | 324.5835   | -1606.8339  | 7162.8533 |
| 323.8677              | -103.9636   | -83.1442   | 664265.7895 | -2.4970   |
| -2.5050               |             |            |             |           |
| [8336]ENERGY: 2870000 | 3559.8243   | 5855.3903  | 5911.4747   |           |
| 358.4798              | -15421.3447 | -1892.1573 | 0.0000      | 0.0000    |

## Supplementary Text 6

|                       |             |            |             |           |
|-----------------------|-------------|------------|-------------|-----------|
| 8720.2261             | 7091.8931   | 325.3062   | -1628.3330  | 7163.2577 |
| 323.9839              | -45.2007    | -31.8817   | 664265.7895 | -0.7922   |
| -0.7970               |             |            |             |           |
| [8372]ENERGY: 2880000 | 3541.3801   | 5760.5409  | 5933.0432   |           |
| 359.4172              | -15351.0598 | -1834.9740 | 0.0000      | 0.0000    |
| 8685.1639             | 7093.5115   | 323.9982   | -1591.6524  | 7163.7883 |
| 324.0424              | -167.4098   | -176.6238  | 664265.7895 | 0.4040    |
| 0.4021                |             |            |             |           |
| [8422]ENERGY: 2890000 | 3493.0392   | 5814.9511  | 5939.6987   |           |
| 399.4358              | -15401.3263 | -1827.7162 | 0.0000      | 0.0000    |
| 8674.8202             | 7092.9025   | 323.6123   | -1581.9177  | 7165.3867 |
| 323.9254              | 81.5249     | -10.9873   | 664265.7895 | 0.7864    |
| 0.8099                |             |            |             |           |
| [8461]ENERGY: 2900000 | 3600.4431   | 5817.5567  | 5923.5561   |           |
| 354.3877              | -15365.5889 | -1850.9030 | 0.0000      | 0.0000    |
| 8615.3372             | 7094.7889   | 321.3933   | -1520.5483  | 7164.6172 |
| 323.8293              | 57.5855     | 4.3486     | 664265.7895 | -5.0255   |
| -5.0634               |             |            |             |           |
| [8511]ENERGY: 2910000 | 3596.3626   | 5754.9238  | 5881.8379   |           |
| 360.2709              | -15305.5848 | -1904.8960 | 0.0000      | 0.0000    |
| 8709.5074             | 7092.4218   | 324.9063   | -1617.0856  | 7163.9635 |
| 323.8333              | -60.8633    | -53.6727   | 664265.7895 | -3.3371   |
| -3.3052               |             |            |             |           |
| [8547]ENERGY: 2920000 | 3503.7517   | 5829.4830  | 5872.8270   |           |
| 372.6395              | -15299.0802 | -1886.8120 | 0.0000      | 0.0000    |
| 8698.5167             | 7091.3256   | 324.4963   | -1607.1911  | 7164.6990 |
| 323.9091              | -119.3248   | -68.4581   | 664265.7895 | -4.5486   |
| -4.5588               |             |            |             |           |
| [8597]ENERGY: 2930000 | 3530.2981   | 5709.9370  | 5967.7388   |           |
| 340.7750              | -15420.1136 | -1830.1488 | 0.0000      | 0.0000    |
| 8795.9414             | 7094.4279   | 328.1307   | -1701.5135  | 7165.5410 |
| 323.9974              | 0.5886      | -8.4291    | 664265.7895 | -2.8777   |
| -2.8761               |             |            |             |           |
| [8633]ENERGY: 2940000 | 3540.3831   | 5896.3834  | 5845.1430   |           |
| 354.7881              | -15394.3113 | -1885.8314 | 0.0000      | 0.0000    |
| 8741.6813             | 7098.2362   | 326.1065   | -1643.4451  | 7166.4607 |
| 323.9515              | 24.8565     | -74.1135   | 664265.7895 | -6.9305   |
| -6.9554               |             |            |             |           |
| [8683]ENERGY: 2950000 | 3519.3334   | 5789.9646  | 5970.5100   |           |
| 361.3959              | -15383.8279 | -1812.6098 | 0.0000      | 0.0000    |
| 8649.8300             | 7094.5961   | 322.6800   | -1555.2339  | 7165.3727 |
| 323.8164              | 41.6769     | 79.0932    | 664265.7895 | -2.6029   |
| -2.5809               |             |            |             |           |
| [8719]ENERGY: 2960000 | 3580.1099   | 5762.2554  | 5864.4535   |           |
| 335.1529              | -15318.8924 | -1865.6495 | 0.0000      | 0.0000    |
| 8736.8547             | 7094.2844   | 325.9265   | -1642.5702  | 7167.0620 |
| 323.9298              | 100.4491    | 47.3856    | 664265.7895 | -2.1675   |
| -2.1724               |             |            |             |           |
| [8769]ENERGY: 2970000 | 3563.4940   | 5731.2325  | 5917.8927   |           |
| 378.3646              | -15327.2938 | -1852.9315 | 0.0000      | 0.0000    |
| 8685.5906             | 7096.3491   | 324.0141   | -1589.2414  | 7168.1581 |
| 324.2116              | 35.6230     | -58.7199   | 664265.7895 | -7.3258   |
| -7.3305               |             |            |             |           |
| [8805]ENERGY: 2980000 | 3555.0899   | 5758.1951  | 5836.9797   |           |

## Supplementary Text 6

|                       |             |            |             |           |
|-----------------------|-------------|------------|-------------|-----------|
| 346.8091              | -15290.7558 | -1834.7264 | 0.0000      | 0.0000    |
| 8724.6961             | 7096.2877   | 325.4729   | -1628.4084  | 7166.2721 |
| 323.9630              | 140.9574    | 146.7094   | 664265.7895 | -6.3664   |
| -6.3427               |             |            |             |           |
| [8855]ENERGY: 2990000 | 3586.5845   | 5748.1214  | 5879.5214   |           |
| 370.1452              | -15329.8139 | -1861.9415 | 0.0000      | 0.0000    |
| 8704.5903             | 7097.2075   | 324.7229   | -1607.3829  | 7167.6097 |
| 324.1885              | 62.4264     | 44.5746    | 664265.7895 | -5.0523   |
| -5.0730               |             |            |             |           |
| [8894]ENERGY: 3000000 | 3559.8746   | 5707.5592  | 5933.2417   |           |
| 369.8574              | -15354.5397 | -1834.9415 | 0.0000      | 0.0000    |
| 8718.5662             | 7099.6180   | 325.2442   | -1618.9482  | 7168.6382 |
| 323.9552              | 122.9405    | 66.9559    | 664265.7895 | -5.1286   |
| -5.1306               |             |            |             |           |
| [8944]ENERGY: 3010000 | 3533.1912   | 5833.6316  | 5906.9072   |           |
| 353.6618              | -15350.9364 | -1878.6037 | 0.0000      | 0.0000    |
| 8701.6700             | 7099.5217   | 324.6139   | -1602.1483  | 7170.1169 |
| 324.1169              | 59.7764     | 33.0439    | 664265.7895 | -4.0981   |
| -4.0937               |             |            |             |           |
| [8980]ENERGY: 3020000 | 3587.5434   | 5690.3261  | 5898.0165   |           |
| 366.6942              | -15403.6583 | -1791.9580 | 0.0000      | 0.0000    |
| 8752.3143             | 7099.2781   | 326.5032   | -1653.0362  | 7168.9757 |
| 323.9127              | 100.5827    | 129.5669   | 664265.7895 | -4.4444   |
| -4.4413               |             |            |             |           |
| [9030]ENERGY: 3030000 | 3553.9919   | 5935.9710  | 5820.5735   |           |
| 373.4014              | -15340.9737 | -1836.3311 | 0.0000      | 0.0000    |
| 8593.2236             | 7099.8565   | 320.5684   | -1493.3671  | 7169.0034 |
| 323.9344              | 124.4710    | 46.5756    | 664265.7895 | -2.4811   |
| -2.5023               |             |            |             |           |
| [9066]ENERGY: 3040000 | 3571.3237   | 5815.7075  | 5909.2209   |           |
| 351.6808              | -15340.6526 | -1847.3059 | 0.0000      | 0.0000    |
| 8637.9177             | 7097.8919   | 322.2357   | -1540.0258  | 7169.7439 |
| 323.8765              | 8.7609      | -20.7594   | 664265.7895 | -6.2221   |
| -6.1858               |             |            |             |           |
| [9116]ENERGY: 3050000 | 3624.2760   | 5909.2421  | 5909.3514   |           |
| 364.1650              | -15303.9178 | -1857.2551 | 0.0000      | 0.0000    |
| 8455.8508             | 7101.7124   | 315.4437   | -1354.1384  | 7170.1468 |
| 323.9047              | -38.9711    | 31.2060    | 664265.7895 | -1.7212   |
| -1.7335               |             |            |             |           |
| [9152]ENERGY: 3060000 | 3603.9853   | 5722.5315  | 5901.8200   |           |
| 374.1998              | -15445.0767 | -1792.0106 | 0.0000      | 0.0000    |
| 8735.1602             | 7100.6094   | 325.8633   | -1634.5508  | 7168.7383 |
| 323.9469              | 23.5899     | 37.8376    | 664265.7895 | -5.7404   |
| -5.7444               |             |            |             |           |
| [9202]ENERGY: 3070000 | 3500.3967   | 5737.6998  | 5893.7794   |           |
| 376.6969              | -15271.8087 | -1836.4175 | 0.0000      | 0.0000    |
| 8699.0808             | 7099.4273   | 324.5173   | -1599.6535  | 7168.9881 |
| 323.8874              | 98.2267     | 106.8052   | 664265.7895 | -5.2682   |
| -5.2705               |             |            |             |           |
| [9238]ENERGY: 3080000 | 3585.1882   | 5831.2960  | 5908.3728   |           |
| 358.3367              | -15407.3528 | -1823.5174 | 0.0000      | 0.0000    |
| 8646.9521             | 7099.2755   | 322.5727   | -1547.6765  | 7170.8063 |
| 323.9812              | 77.4261     | -21.6600   | 664265.7895 | -5.3830   |
| -5.3747               |             |            |             |           |

## Supplementary Text 6

|                       |             |            |             |           |
|-----------------------|-------------|------------|-------------|-----------|
| [9288]ENERGY: 3090000 | 3596.0515   | 5715.8132  | 5963.0263   |           |
| 375.7553              | -15365.2369 | -1778.5799 | 0.0000      | 0.0000    |
| 8598.6575             | 7105.4869   | 320.7711   | -1493.1705  | 7170.8451 |
| 324.0409              | 115.5157    | 76.3053    | 664265.7895 | -6.1200   |
| -6.1380               |             |            |             |           |
| [9327]ENERGY: 3100000 | 3545.3055   | 5805.7027  | 5865.4073   |           |
| 311.5498              | -15307.8662 | -1820.7134 | 0.0000      | 0.0000    |
| 8703.3403             | 7102.7261   | 324.6762   | -1600.6142  | 7171.2395 |
| 323.9665              | -154.6844   | -57.9982   | 664265.7895 | -5.7875   |
| -5.7676               |             |            |             |           |
| [9377]ENERGY: 3110000 | 3549.7221   | 5832.7788  | 5928.5372   |           |
| 323.3785              | -15386.4179 | -1878.1169 | 0.0000      | 0.0000    |
| 8727.6176             | 7097.4994   | 325.5819   | -1630.1182  | 7169.3037 |
| 324.1235              | 58.3974     | 41.0133    | 664265.7895 | -5.9169   |
| -5.9219               |             |            |             |           |
| [9413]ENERGY: 3120000 | 3610.5324   | 5836.4326  | 5873.6218   |           |
| 352.1413              | -15312.3572 | -1872.8955 | 0.0000      | 0.0000    |
| 8616.5983             | 7104.0738   | 321.4403   | -1512.5245  | 7171.6886 |
| 324.0251              | -142.2922   | -84.2917   | 664265.7895 | -8.7155   |
| -8.7290               |             |            |             |           |
| [9463]ENERGY: 3130000 | 3533.4294   | 5777.9723  | 5886.8704   |           |
| 362.9895              | -15406.9547 | -1807.3470 | 0.0000      | 0.0000    |
| 8752.7410             | 7099.7009   | 326.5191   | -1653.0402  | 7171.5427 |
| 323.9471              | 3.0780      | 55.2398    | 664265.7895 | -8.7326   |
| -8.7287               |             |            |             |           |
| [9499]ENERGY: 3140000 | 3562.1156   | 5814.4942  | 5876.4346   |           |
| 368.1227              | -15379.0583 | -1863.1790 | 0.0000      | 0.0000    |
| 8718.6020             | 7097.5318   | 325.2456   | -1621.0702  | 7171.1342 |
| 324.0418              | -48.0055    | 24.1897    | 664265.7895 | -6.8527   |
| -6.8543               |             |            |             |           |
| [9549]ENERGY: 3150000 | 3606.3467   | 5764.2882  | 5964.6078   |           |
| 366.1866              | -15365.7378 | -1879.4163 | 0.0000      | 0.0000    |
| 8646.5700             | 7102.8451   | 322.5584   | -1543.7249  | 7171.4889 |
| 323.8287              | -16.8318    | 26.5480    | 664265.7895 | -7.8246   |
| -7.8187               |             |            |             |           |
| [9585]ENERGY: 3160000 | 3629.7788   | 5819.7522  | 5887.2088   |           |
| 331.6974              | -15368.3196 | -1858.2181 | 0.0000      | 0.0000    |
| 8661.3770             | 7103.2764   | 323.1108   | -1558.1006  | 7171.9401 |
| 323.7865              | -60.8029    | -94.8758   | 664265.7895 | -6.4716   |
| -6.4737               |             |            |             |           |
| [9635]ENERGY: 3170000 | 3510.6505   | 5771.3388  | 5905.1890   |           |
| 348.4075              | -15281.0613 | -1811.7366 | 0.0000      | 0.0000    |
| 8658.3035             | 7101.0914   | 322.9961   | -1557.2121  | 7171.6696 |
| 323.9745              | 28.2265     | -34.6646   | 664265.7895 | -7.8298   |
| -7.8402               |             |            |             |           |
| [9671]ENERGY: 3180000 | 3469.2843   | 5825.9999  | 5941.5124   |           |
| 368.5248              | -15327.5968 | -1779.5616 | 0.0000      | 0.0000    |
| 8602.7204             | 7100.8834   | 320.9226   | -1501.8371  | 7172.5826 |
| 324.0356              | 111.1925    | 74.5620    | 664265.7895 | -9.4553   |
| -9.4402               |             |            |             |           |
| [9721]ENERGY: 3190000 | 3534.3567   | 5868.2984  | 5865.0219   |           |
| 384.8781              | -15336.8516 | -1869.5011 | 0.0000      | 0.0000    |
| 8655.6477             | 7101.8501   | 322.8971   | -1553.7975  | 7171.5665 |
| 324.0987              | 182.9780    | 87.6156    | 664265.7895 | -7.6070   |

Supplementary Text 6

-7.6160  
 [9760]ENERGY: 3200000      3525.1122      5727.0876      5917.9218  
 373.8217      -15299.2336      -1857.3738      0.0000      0.0000  
 8715.9416      7103.2776      325.1463      -1612.6640      7172.1396  
 324.1776      66.4292      89.0490      664265.7895      -8.2522  
 -8.2367  
 [9810]ENERGY: 3210000      3610.4521      5870.4353      5870.7161  
 364.2747      -15360.8724      -1880.4679      0.0000      0.0000  
 8635.3190      7109.8569      322.1387      -1525.4621      7174.7543  
 324.0938      -55.7546      -115.5975      664265.7895      -10.0841  
 -10.0956  
 [9846]ENERGY: 3220000      3594.0332      5878.3785      5886.3908  
 368.4568      -15399.8298      -1847.1995      0.0000      0.0000  
 8624.5914      7104.8214      321.7385      -1519.7700      7173.6326  
 324.3085      -17.0295      5.1774      664265.7895      -7.8533  
 -7.8592  
 [9896]ENERGY: 3230000      3598.2447      5921.6463      5875.9397  
 368.4215      -15458.9316      -1880.1969      0.0000      0.0000  
 8680.9467      7106.0703      323.8408      -1574.8764      7174.8633  
 324.1026      -103.5887      -90.1318      664265.7895      -11.7948  
 -11.7864  
 [9932]ENERGY: 3240000      3598.2367      5815.6708      5920.6234  
 350.2289      -15376.9612      -1794.8275      0.0000      0.0000  
 8595.2628      7108.2339      320.6444      -1487.0289      7175.4124  
 323.8462      -26.7650      -70.5281      664265.7895      -10.4111  
 -10.4286  
 [9982]ENERGY: 3250000      3593.2742      5895.4498      5879.4569  
 362.4441      -15377.1423      -1951.5589      0.0000      0.0000  
 8705.2060      7107.1298      324.7458      -1598.0762      7177.1358  
 324.0802      -251.4468      -243.1929      664265.7895      -8.1824  
 -8.1638  
 [10018]ENERGY: 3260000      3484.2681      5806.3076      5932.0512  
 363.8279      -15298.7084      -1910.5696      0.0000      0.0000  
 8727.0723      7104.2490      325.5616      -1622.8233      7177.8698  
 323.9825      -89.7861      -108.9202      664265.7895      -10.8561  
 -10.8486  
 [10068]ENERGY: 3270000      3542.5733      5720.4089      5926.0712  
 360.8829      -15306.8419      -1873.1441      0.0000      0.0000  
 8734.6312      7104.5815      325.8435      -1630.0497      7176.3102  
 323.9908      138.6551      110.9576      664265.7895      -7.3024  
 -7.3018  
 [10104]ENERGY: 3280000      3580.0140      5730.3955      5953.3971  
 359.8583      -15329.8092      -1870.7254      0.0000      0.0000  
 8683.4236      7106.5538      323.9332      -1576.8698      7177.8351  
 323.8568      203.1066      90.3925      664265.7895      -9.6495  
 -9.6628  
 [10154]ENERGY: 3290000      3647.6719      5836.8852      5882.7730  
 353.6801      -15381.2405      -1904.3949      0.0000      0.0000  
 8671.1796      7106.5544      323.4765      -1564.6252      7177.9020  
 324.0034      -148.8553      -155.3564      664265.7895      -8.6830  
 -8.6871  
 [10193]ENERGY: 3300000      3547.3270      5769.8822      5891.9912  
 377.2372      -15301.8778      -1826.9489      0.0000      0.0000  
 8649.8158      7107.4267      322.6795      -1542.3891      7177.8830



## Supplementary Text 6

|                        |             |            |             |           |
|------------------------|-------------|------------|-------------|-----------|
| 323.9942               | -23.0030    | -33.6385   | 664265.7895 | -10.2752  |
| -10.2639               |             |            |             |           |
| [10243]ENERGY: 3310000 | 3537.0764   | 5803.5694  | 5906.6107   |           |
| 363.8079               | -15331.1940 | -1891.4723 | 0.0000      | 0.0000    |
| 8717.2063              | 7105.6045   | 325.1935   | -1611.6019  | 7176.7974 |
| 323.8962               | 113.2110    | 134.0169   | 664265.7895 | -10.2040  |
| -10.2038               |             |            |             |           |
| [10279]ENERGY: 3320000 | 3600.5373   | 5910.1381  | 5923.4849   |           |
| 373.9519               | -15391.6178 | -1896.3527 | 0.0000      | 0.0000    |
| 8591.3195              | 7111.4613   | 320.4973   | -1479.8583  | 7178.1580 |
| 324.0055               | 88.0769     | -1.0565    | 664265.7895 | -10.0986  |
| -10.0905               |             |            |             |           |
| [10329]ENERGY: 3330000 | 3556.6650   | 5864.5673  | 5982.6044   |           |
| 380.3738               | -15441.0206 | -1890.3831 | 0.0000      | 0.0000    |
| 8653.6099              | 7106.4166   | 322.8211   | -1547.1932  | 7177.5247 |
| 323.9607               | 63.1438     | 60.6002    | 664265.7895 | -9.3666   |
| -9.3719                |             |            |             |           |
| [10365]ENERGY: 3340000 | 3613.4875   | 5855.2419  | 5833.3045   |           |
| 376.1759               | -15312.7838 | -1842.9399 | 0.0000      | 0.0000    |
| 8585.3843              | 7107.8705   | 320.2759   | -1477.5138  | 7177.3680 |
| 323.9752               | -53.5670    | -14.0779   | 664265.7895 | -7.6081   |
| -7.6180                |             |            |             |           |
| [10415]ENERGY: 3350000 | 3630.7587   | 5794.6144  | 5860.4689   |           |
| 331.8215               | -15294.8949 | -1900.4997 | 0.0000      | 0.0000    |
| 8687.4749              | 7109.7439   | 324.0844   | -1577.7310  | 7177.9607 |
| 324.1527               | 33.2605     | -51.9801   | 664265.7895 | -6.1889   |
| -6.1884                |             |            |             |           |
| [10451]ENERGY: 3360000 | 3630.4933   | 5861.7975  | 5936.0277   |           |
| 371.0993               | -15379.6204 | -1881.3909 | 0.0000      | 0.0000    |
| 8573.2331              | 7111.6396   | 319.8226   | -1461.5935  | 7179.8344 |
| 324.3155               | 45.6595     | -43.3024   | 664265.7895 | 6.0052    |
| 5.9907                 |             |            |             |           |
| [10501]ENERGY: 3370000 | 3540.0689   | 5743.0377  | 5899.7252   |           |
| 369.6504               | -15291.2662 | -1822.0714 | 0.0000      | 0.0000    |
| 8669.9161              | 7109.0606   | 323.4294   | -1560.8555  | 7181.2222 |
| 324.0624               | 231.4141    | 135.1986   | 664265.7895 | 3.4011    |
| 3.4210                 |             |            |             |           |
| [10537]ENERGY: 3380000 | 3526.6953   | 5759.4384  | 5936.8309   |           |
| 349.8902               | -15270.9983 | -1908.8228 | 0.0000      | 0.0000    |
| 8718.7880              | 7111.8217   | 325.2525   | -1606.9663  | 7179.9536 |
| 324.0184               | -17.6279    | -82.3823   | 664265.7895 | -0.3397   |
| -0.3340                |             |            |             |           |
| [10587]ENERGY: 3390000 | 3489.4930   | 5836.4362  | 5912.2455   |           |
| 373.6011               | -15382.8895 | -1792.8340 | 0.0000      | 0.0000    |
| 8675.0657              | 7111.1180   | 323.6215   | -1563.9477  | 7179.2657 |
| 324.1097               | 146.7154    | 93.9824    | 664265.7895 | 0.1222    |
| 0.1196                 |             |            |             |           |
| [10626]ENERGY: 3400000 | 3539.2337   | 5726.1659  | 5934.6617   |           |
| 356.3228               | -15287.9620 | -1845.3149 | 0.0000      | 0.0000    |
| 8687.5456              | 7110.6529   | 324.0870   | -1576.8927  | 7180.0492 |
| 324.2808               | 151.9962    | 66.3483    | 664265.7895 | 0.0753    |
| 0.0482                 |             |            |             |           |
| [10676]ENERGY: 3410000 | 3576.2905   | 5788.1402  | 5927.7454   |           |
| 359.5151               | -15320.6320 | -1871.9127 | 0.0000      | 0.0000    |

## Supplementary Text 6

|                        |             |            |             |           |
|------------------------|-------------|------------|-------------|-----------|
| 8650.4281              | 7109.5746   | 322.7024   | -1540.8535  | 7180.7145 |
| 324.1457               | -16.5872    | -156.3033  | 664265.7895 | -10.7308  |
| -10.7124               |             |            |             |           |
| [10712]ENERGY: 3420000 | 3618.1166   | 5759.1282  | 5920.4829   |           |
| 351.1744               | -15382.9655 | -1876.0868 | 0.0000      | 0.0000    |
| 8718.3706              | 7108.2205   | 325.2369   | -1610.1501  | 7180.0823 |
| 324.1704               | -117.3758   | -124.1277  | 664265.7895 | -11.1936  |
| -11.1965               |             |            |             |           |
| [10762]ENERGY: 3430000 | 3469.0119   | 5755.1592  | 5908.1920   |           |
| 352.2612               | -15251.4812 | -1849.8014 | 0.0000      | 0.0000    |
| 8723.1948              | 7106.5365   | 325.4169   | -1616.6583  | 7179.5405 |
| 323.8767               | 5.2069      | 62.1305    | 664265.7895 | -9.0377   |
| -9.0216                |             |            |             |           |
| [10798]ENERGY: 3440000 | 3567.4596   | 5878.3832  | 5859.3203   |           |
| 376.1948               | -15344.4755 | -1935.0535 | 0.0000      | 0.0000    |
| 8705.9161              | 7107.7450   | 324.7723   | -1598.1712  | 7180.7176 |
| 324.1254               | -205.4314   | -158.8073  | 664265.7895 | -7.4583   |
| -7.4635                |             |            |             |           |
| [10848]ENERGY: 3450000 | 3503.5821   | 5812.8788  | 5918.8527   |           |
| 356.8412               | -15343.4995 | -1839.5484 | 0.0000      | 0.0000    |
| 8700.1673              | 7109.2742   | 324.5579   | -1590.8931  | 7179.3199 |
| 324.0140               | 55.9158     | -3.2983    | 664265.7895 | -10.4960  |
| -10.5077               |             |            |             |           |
| [10884]ENERGY: 3460000 | 3520.8606   | 5820.6912  | 5905.0971   |           |
| 385.2524               | -15378.2859 | -1854.4947 | 0.0000      | 0.0000    |
| 8708.5343              | 7107.6549   | 324.8700   | -1600.8794  | 7180.1125 |
| 324.0055               | 116.0702    | 66.8342    | 664265.7895 | -5.1749   |
| -5.1591                |             |            |             |           |
| [10934]ENERGY: 3470000 | 3639.6734   | 5700.9445  | 5924.3863   |           |
| 338.0197               | -15310.6484 | -1866.2328 | 0.0000      | 0.0000    |
| 8687.3293              | 7113.4720   | 324.0789   | -1573.8573  | 7180.9123 |
| 323.9207               | 143.3583    | 77.4880    | 664265.7895 | -9.3792   |
| -9.3999                |             |            |             |           |
| [10970]ENERGY: 3480000 | 3467.4013   | 5743.5047  | 5919.6659   |           |
| 379.9986               | -15289.0746 | -1826.6030 | 0.0000      | 0.0000    |
| 8713.8689              | 7108.7618   | 325.0690   | -1605.1070  | 7179.9611 |
| 324.1493               | 245.3356    | 162.0192   | 664265.7895 | -5.2539   |
| -5.2290                |             |            |             |           |
| [11020]ENERGY: 3490000 | 3601.3917   | 5753.3583  | 5934.3072   |           |
| 371.5158               | -15383.5416 | -1827.4793 | 0.0000      | 0.0000    |
| 8664.7967              | 7114.3488   | 323.2384   | -1550.4479  | 7179.7850 |
| 324.2648               | 123.3944    | 159.3582   | 664265.7895 | 0.9956    |
| 0.9857                 |             |            |             |           |
| [11059]ENERGY: 3500000 | 3561.5810   | 5810.5141  | 5900.7055   |           |
| 386.8848               | -15328.6342 | -1848.3492 | 0.0000      | 0.0000    |
| 8628.3660              | 7111.0679   | 321.8793   | -1517.2981  | 7180.0574 |
| 323.9733               | 37.8288     | 1.8707     | 664265.7895 | -4.2652   |
| -4.2647                |             |            |             |           |
| [11109]ENERGY: 3510000 | 3491.0622   | 5885.4942  | 5975.4115   |           |
| 345.8831               | -15376.1303 | -1857.1917 | 0.0000      | 0.0000    |
| 8647.5702              | 7112.0992   | 322.5957   | -1535.4709  | 7182.3161 |
| 324.2008               | 70.9185     | 60.6540    | 664265.7895 | -1.4199   |
| -1.4200                |             |            |             |           |
| [11145]ENERGY: 3520000 | 3608.0139   | 5685.2125  | 5914.0076   |           |

## Supplementary Text 6

|                        |             |            |             |           |
|------------------------|-------------|------------|-------------|-----------|
| 350.9063               | -15370.8115 | -1819.6596 | 0.0000      | 0.0000    |
| 8742.5438              | 7110.2130   | 326.1387   | -1632.3308  | 7180.3423 |
| 324.2271               | 182.1383    | 106.3440   | 664265.7895 | 1.6749    |
| 1.6525                 |             |            |             |           |
| [11195]ENERGY: 3530000 | 3619.6596   | 5789.7221  | 5956.3611   |           |
| 359.7620               | -15343.7904 | -1868.1752 | 0.0000      | 0.0000    |
| 8598.0232              | 7111.5624   | 320.7474   | -1486.4608  | 7181.0453 |
| 324.0984               | 60.2910     | 47.1304    | 664265.7895 | 0.6839    |
| 0.7022                 |             |            |             |           |
| [11231]ENERGY: 3540000 | 3520.7640   | 5820.2173  | 5893.1493   |           |
| 389.9813               | -15292.2049 | -1893.4756 | 0.0000      | 0.0000    |
| 8678.0674              | 7116.4988   | 323.7334   | -1561.5686  | 7183.1224 |
| 324.0527               | -64.4737    | 15.6391    | 664265.7895 | -11.7354  |
| -11.7297               |             |            |             |           |
| [11281]ENERGY: 3550000 | 3499.0475   | 5855.1869  | 5896.2043   |           |
| 352.6331               | -15314.5866 | -1920.5370 | 0.0000      | 0.0000    |
| 8740.4454              | 7108.3936   | 326.0604   | -1632.0519  | 7182.8467 |
| 324.2004               | 146.2766    | 90.3361    | 664265.7895 | -12.3673  |
| -12.3694               |             |            |             |           |
| [11317]ENERGY: 3560000 | 3517.5928   | 5770.9834  | 5886.4095   |           |
| 341.9241               | -15289.7274 | -1811.5524 | 0.0000      | 0.0000    |
| 8695.4167              | 7111.0467   | 324.3806   | -1584.3700  | 7184.0057 |
| 324.2372               | 49.8421     | 8.9233     | 664265.7895 | -3.2048   |
| -3.2074                |             |            |             |           |
| [11367]ENERGY: 3570000 | 3614.4351   | 5809.8765  | 5897.2071   |           |
| 341.9312               | -15329.1155 | -1875.6573 | 0.0000      | 0.0000    |
| 8656.9164              | 7115.5934   | 322.9444   | -1541.3229  | 7185.7008 |
| 324.2332               | 88.3512     | 82.1022    | 664265.7895 | -4.7919   |
| -4.8009                |             |            |             |           |
| [11403]ENERGY: 3580000 | 3535.2910   | 5759.6235  | 5924.9709   |           |
| 367.4640               | -15398.5867 | -1761.3597 | 0.0000      | 0.0000    |
| 8687.9473              | 7115.3503   | 324.1020   | -1572.5970  | 7186.4231 |
| 324.2113               | 147.3850    | 61.0796    | 664265.7895 | -0.4764   |
| -0.4693                |             |            |             |           |
| [11453]ENERGY: 3590000 | 3583.5437   | 5769.8789  | 5877.6020   |           |
| 366.2376               | -15266.4871 | -1858.8096 | 0.0000      | 0.0000    |
| 8645.1001              | 7117.0656   | 322.5036   | -1528.0345  | 7186.2311 |
| 324.5003               | 154.5418    | 116.6571   | 664265.7895 | -2.6761   |
| -2.6680                |             |            |             |           |
| [11492]ENERGY: 3600000 | 3584.7974   | 5713.1174  | 5913.8842   |           |
| 358.4321               | -15336.3666 | -1822.4716 | 0.0000      | 0.0000    |
| 8701.7783              | 7113.1711   | 324.6180   | -1588.6072  | 7185.9308 |
| 324.4579               | 142.8619    | 62.4117    | 664265.7895 | -3.2114   |
| -3.2159                |             |            |             |           |
| [11542]ENERGY: 3610000 | 3634.3989   | 5764.9041  | 5947.9111   |           |
| 367.9523               | -15381.5495 | -1847.9849 | 0.0000      | 0.0000    |
| 8629.4597              | 7115.0918   | 321.9201   | -1514.3679  | 7185.7526 |
| 324.4093               | -105.7577   | -82.9886   | 664265.7895 | -3.1032   |
| -3.1100                |             |            |             |           |
| [11578]ENERGY: 3620000 | 3517.5960   | 5817.3474  | 5918.9118   |           |
| 362.7082               | -15339.4531 | -1812.3051 | 0.0000      | 0.0000    |
| 8650.5048              | 7115.3099   | 322.7052   | -1535.1949  | 7184.7095 |
| 324.3165               | 112.1368    | 101.7819   | 664265.7895 | -0.8532   |
| -0.8313                |             |            |             |           |

## Supplementary Text 6

|                        |             |            |             |           |
|------------------------|-------------|------------|-------------|-----------|
| [11628]ENERGY: 3630000 | 3512.4964   | 5782.4967  | 5902.2989   |           |
| 358.5518               | -15320.2014 | -1818.9758 | 0.0000      | 0.0000    |
| 8697.5953              | 7114.2618   | 324.4619   | -1583.3334  | 7186.1735 |
| 324.3577               | 195.4522    | 125.7390   | 664265.7895 | -7.9876   |
| -8.0045                |             |            |             |           |
| [11664]ENERGY: 3640000 | 3553.8954   | 5949.0449  | 5875.4244   |           |
| 378.8376               | -15378.2649 | -1871.3821 | 0.0000      | 0.0000    |
| 8607.5367              | 7115.0918   | 321.1023   | -1492.4449  | 7185.3475 |
| 324.2323               | -34.5904    | -35.4880   | 664265.7895 | -14.1315  |
| -14.1248               |             |            |             |           |
| [11714]ENERGY: 3650000 | 3553.0482   | 5736.7122  | 5874.3493   |           |
| 349.9871               | -15309.1736 | -1881.7504 | 0.0000      | 0.0000    |
| 8790.1019              | 7113.2747   | 327.9129   | -1676.8272  | 7186.0421 |
| 324.2988               | 95.5110     | 30.2777    | 664265.7895 | -11.0705  |
| -11.0867               |             |            |             |           |
| [11750]ENERGY: 3660000 | 3524.3122   | 5823.5554  | 5874.7271   |           |
| 378.5543               | -15346.2327 | -1852.3100 | 0.0000      | 0.0000    |
| 8710.0776              | 7112.6839   | 324.9276   | -1597.3937  | 7185.2859 |
| 324.2383               | 20.7834     | -74.7821   | 664265.7895 | -13.0902  |
| -13.0854               |             |            |             |           |
| [11800]ENERGY: 3670000 | 3544.6155   | 5833.1113  | 5855.6008   |           |
| 387.1906               | -15399.3831 | -1741.6238 | 0.0000      | 0.0000    |
| 8633.6956              | 7113.2068   | 322.0782   | -1520.4888  | 7184.4888 |
| 324.4589               | 42.7875     | 22.1174    | 664265.7895 | -1.4211   |
| -1.4154                |             |            |             |           |
| [11836]ENERGY: 3680000 | 3572.8208   | 5782.8675  | 5934.3147   |           |
| 365.5167               | -15387.2096 | -1912.1315 | 0.0000      | 0.0000    |
| 8760.0765              | 7116.2552   | 326.7928   | -1643.8213  | 7185.7250 |
| 324.4837               | 99.6883     | 14.3048    | 664265.7895 | -1.1601   |
| -1.1693                |             |            |             |           |
| [11886]ENERGY: 3690000 | 3583.3476   | 5882.4235  | 5884.2415   |           |
| 356.5154               | -15350.0571 | -1871.1364 | 0.0000      | 0.0000    |
| 8629.7806              | 7115.1151   | 321.9321   | -1514.6655  | 7184.7303 |
| 324.4353               | -111.7222   | -13.1143   | 664265.7895 | -11.0933  |
| -11.0877               |             |            |             |           |
| [11925]ENERGY: 3700000 | 3563.5341   | 5823.6698  | 5941.2154   |           |
| 363.8295               | -15376.5454 | -1815.9555 | 0.0000      | 0.0000    |
| 8614.3870              | 7114.1350   | 321.3579   | -1500.2521  | 7184.1647 |
| 324.4478               | -31.1143    | -53.0512   | 664265.7895 | 0.2681    |
| 0.2646                 |             |            |             |           |
| [11975]ENERGY: 3710000 | 3512.4388   | 5772.9399  | 5862.3026   |           |
| 355.0963               | -15344.9432 | -1825.7193 | 0.0000      | 0.0000    |
| 8779.9514              | 7112.0664   | 327.5342   | -1667.8850  | 7184.5597 |
| 324.4206               | 106.9480    | 29.9070    | 664265.7895 | -4.4039   |
| -4.3928                |             |            |             |           |
| [12011]ENERGY: 3720000 | 3591.0131   | 5832.6465  | 5861.0083   |           |
| 397.2868               | -15358.8498 | -1883.8948 | 0.0000      | 0.0000    |
| 8676.5258              | 7115.7358   | 323.6759   | -1560.7899  | 7184.9276 |
| 324.5712               | 22.4409     | -69.9810   | 664265.7895 | -2.0569   |
| -2.0642                |             |            |             |           |
| [12061]ENERGY: 3730000 | 3544.6725   | 5751.9301  | 5910.9050   |           |
| 353.5191               | -15259.4768 | -1911.3569 | 0.0000      | 0.0000    |
| 8726.9551              | 7117.1481   | 325.5572   | -1609.8069  | 7186.5110 |
| 324.5254               | 316.5728    | 131.1819   | 664265.7895 | 0.3057    |

Supplementary Text 6

0.3110  
 [12097]ENERGY: 3740000 3493.7585 5780.6584 5889.6691  
 377.8054 -15312.0897 -1828.5198 0.0000 0.0000  
 8714.6374 7115.9194 325.0977 -1598.7181 7186.1498  
 324.4021 196.2377 107.7543 664265.7895 -1.2529  
 -1.2447  
 [12147]ENERGY: 3750000 3498.9388 5870.6230 5956.3335  
 355.6414 -15423.1999 -1859.9027 0.0000 0.0000  
 8716.0249 7114.4589 325.1494 -1601.5660 7185.1982  
 324.4225 37.5650 30.6391 664265.7895 2.7792  
 2.7833  
 [12183]ENERGY: 3760000 3571.2179 5773.9961 5897.3411  
 360.0837 -15319.1718 -1905.4027 0.0000 0.0000  
 8736.7452 7114.8095 325.9224 -1621.9358 7186.8283  
 324.3435 -48.9263 -144.1770 664265.7895 -1.3192  
 -1.3230  
 [12233]ENERGY: 3770000 3487.6817 5826.9182 5849.8547  
 346.5271 -15338.1800 -1826.8991 0.0000 0.0000  
 8770.5552 7116.4578 327.1837 -1654.0974 7185.4706  
 324.2831 29.4842 15.7062 664265.7895 -2.3914  
 -2.4109  
 [12269]ENERGY: 3780000 3521.5160 5815.5744 5914.9435  
 344.5016 -15358.0689 -1846.6770 0.0000 0.0000  
 8723.1622 7114.9518 325.4157 -1608.2104 7185.7331  
 324.5907 22.0961 -13.7140 664265.7895 -6.9911  
 -6.9590  
 [12319]ENERGY: 3790000 3551.9950 5864.7387 5893.5693  
 352.9068 -15390.0933 -1852.9226 0.0000 0.0000  
 8696.4232 7116.6171 324.4182 -1579.8061 7186.6209  
 324.3540 -117.9564 -39.2110 664265.7895 -0.7139  
 -0.7524  
 [12358]ENERGY: 3800000 3549.5719 5738.3008 5919.3750  
 340.1578 -15300.8332 -1957.4500 0.0000 0.0000  
 8823.9262 7113.0486 329.1747 -1710.8776 7187.8118  
 324.5581 -150.9440 -168.1618 664265.7895 -4.0373  
 -4.0170  
 [12408]ENERGY: 3810000 3618.6711 5875.3270 5832.2275  
 359.9954 -15349.5224 -1839.8152 0.0000 0.0000  
 8620.9984 7117.8816 321.6045 -1503.1167 7186.2140  
 324.4146 -44.7228 -117.4982 664265.7895 -2.9239  
 -2.9318  
 [12444]ENERGY: 3820000 3556.4318 5875.1254 5874.0115  
 362.4433 -15415.8739 -1843.1166 0.0000 0.0000  
 8704.3257 7113.3472 324.7130 -1590.9785 7187.3755  
 324.3247 -49.6819 -39.0510 664265.7895 -0.1404  
 -0.1318  
 [12494]ENERGY: 3830000 3548.5131 5745.1909 5862.5668  
 364.0667 -15285.2036 -1801.0945 0.0000 0.0000  
 8681.9541 7115.9935 323.8784 -1565.9606 7186.6772  
 324.2858 -24.0464 23.6838 664265.7895 -3.7567  
 -3.7565  
 [12530]ENERGY: 3840000 3649.2009 5837.9976 5870.1718  
 378.2902 -15448.7475 -1836.6601 0.0000 0.0000  
 8666.9976 7117.2506 323.3205 -1549.7471 7186.8652

## Supplementary Text 6

|                        |             |            |             |           |
|------------------------|-------------|------------|-------------|-----------|
| 324.4358               | 77.5475     | 65.8000    | 664265.7895 | -3.9550   |
| -3.9593                |             |            |             |           |
| [12580]ENERGY: 3850000 | 3569.2255   | 5872.2580  | 5934.4597   |           |
| 372.2919               | -15373.5256 | -1876.3659 | 0.0000      | 0.0000    |
| 8621.9478              | 7120.2914   | 321.6399   | -1501.6564  | 7188.1754 |
| 324.4982               | 157.4442    | 73.6708    | 664265.7895 | -3.7908   |
| -3.7920                |             |            |             |           |
| [12616]ENERGY: 3860000 | 3589.1299   | 5838.2909  | 5867.3707   |           |
| 355.7678               | -15324.1504 | -1946.5288 | 0.0000      | 0.0000    |
| 8736.9941              | 7116.8743   | 325.9317   | -1620.1198  | 7188.1313 |
| 324.6729               | -89.5423    | -128.4527  | 664265.7895 | -1.8858   |
| -1.8852                |             |            |             |           |
| [12666]ENERGY: 3870000 | 3603.5495   | 5829.5496  | 5943.8789   |           |
| 357.3004               | -15413.1011 | -1881.8196 | 0.0000      | 0.0000    |
| 8677.8445              | 7117.2022   | 323.7251   | -1560.6423  | 7187.6127 |
| 324.6329               | 4.2339      | 32.9665    | 664265.7895 | -6.7550   |
| -6.7383                |             |            |             |           |
| [12702]ENERGY: 3880000 | 3534.9821   | 5796.1474  | 5849.9920   |           |
| 360.1050               | -15351.1430 | -1818.7902 | 0.0000      | 0.0000    |
| 8747.5598              | 7118.8530   | 326.3258   | -1628.7068  | 7188.9199 |
| 324.5913               | 116.0781    | 43.3182    | 664265.7895 | -4.0333   |
| -4.0451                |             |            |             |           |
| [12752]ENERGY: 3890000 | 3522.7493   | 5738.9610  | 5912.0593   |           |
| 365.8693               | -15405.5097 | -1816.4238 | 0.0000      | 0.0000    |
| 8799.4451              | 7117.1504   | 328.2614   | -1682.2947  | 7189.9981 |
| 324.5796               | 60.7505     | 74.3220    | 664265.7895 | -3.5242   |
| -3.5244                |             |            |             |           |
| [12791]ENERGY: 3900000 | 3524.0229   | 5839.9693  | 5855.4040   |           |
| 372.2766               | -15366.7970 | -1758.6982 | 0.0000      | 0.0000    |
| 8654.1874              | 7120.3651   | 322.8426   | -1533.8223  | 7190.7289 |
| 324.5359               | 220.6251    | 146.3226   | 664265.7895 | -7.1637   |
| -7.1622                |             |            |             |           |
| [12841]ENERGY: 3910000 | 3663.9587   | 5939.5338  | 5880.5908   |           |
| 353.6843               | -15383.7398 | -1949.7645 | 0.0000      | 0.0000    |
| 8617.1273              | 7121.3906   | 321.4601   | -1495.7368  | 7189.9122 |
| 324.6264               | -35.9411    | -71.7389   | 664265.7895 | -6.6196   |
| -6.6323                |             |            |             |           |
| [12877]ENERGY: 3920000 | 3519.0785   | 5785.4172  | 5993.8274   |           |
| 336.5727               | -15345.8888 | -1851.4841 | 0.0000      | 0.0000    |
| 8680.0253              | 7117.5482   | 323.8065   | -1562.4771  | 7189.6445 |
| 324.6649               | 107.3355    | 66.3579    | 664265.7895 | -1.8199   |
| -1.8165                |             |            |             |           |
| [12927]ENERGY: 3930000 | 3566.3263   | 5744.5379  | 5895.9819   |           |
| 348.9704               | -15266.6890 | -1865.2441 | 0.0000      | 0.0000    |
| 8694.8028              | 7118.6861   | 324.3577   | -1576.1167  | 7189.7402 |
| 324.4323               | 65.2239     | -42.7942   | 664265.7895 | -3.5196   |
| -3.5271                |             |            |             |           |
| [12963]ENERGY: 3940000 | 3557.4340   | 5843.8849  | 5936.8169   |           |
| 335.6020               | -15406.2445 | -1927.2867 | 0.0000      | 0.0000    |
| 8779.9686              | 7120.1751   | 327.5348   | -1659.7936  | 7190.7717 |
| 324.6251               | -167.5057   | -145.6986  | 664265.7895 | -3.6670   |
| -3.6629                |             |            |             |           |
| [13013]ENERGY: 3950000 | 3572.4653   | 5739.8713  | 5964.2215   |           |
| 357.4595               | -15334.1367 | -1839.5384 | 0.0000      | 0.0000    |

## Supplementary Text 6

|                        |             |            |             |           |
|------------------------|-------------|------------|-------------|-----------|
| 8661.3034              | 7121.6458   | 323.1081   | -1539.6575  | 7190.7149 |
| 324.6325               | 83.3575     | 70.4330    | 664265.7895 | -4.6685   |
| -4.6754                |             |            |             |           |
| [13049]ENERGY: 3960000 | 3632.1243   | 5687.7377  | 5883.0483   |           |
| 355.2230               | -15232.9819 | -1829.7675 | 0.0000      | 0.0000    |
| 8628.7453              | 7124.1292   | 321.8935   | -1504.6161  | 7191.0765 |
| 324.6889               | -53.6739    | -43.9702   | 664265.7895 | -3.5710   |
| -3.5656                |             |            |             |           |
| [13099]ENERGY: 3970000 | 3487.1243   | 5835.2766  | 5921.9284   |           |
| 368.9409               | -15310.7206 | -1886.5869 | 0.0000      | 0.0000    |
| 8704.2699              | 7120.2326   | 324.7109   | -1584.0373  | 7190.2525 |
| 324.5136               | 41.3086     | 53.7475    | 664265.7895 | -3.9934   |
| -3.9733                |             |            |             |           |
| [13135]ENERGY: 3980000 | 3545.7770   | 5921.6074  | 5830.1429   |           |
| 371.8737               | -15375.6743 | -1866.5119 | 0.0000      | 0.0000    |
| 8695.8562              | 7123.0709   | 324.3970   | -1572.7853  | 7193.0844 |
| 324.5940               | 129.2765    | 58.7125    | 664265.7895 | -7.4915   |
| -7.5046                |             |            |             |           |
| [13185]ENERGY: 3990000 | 3598.1044   | 5825.8299  | 5962.8429   |           |
| 328.2268               | -15335.9659 | -1888.3978 | 0.0000      | 0.0000    |
| 8633.3485              | 7123.9887   | 322.0652   | -1509.3597  | 7193.5958 |
| 324.5357               | -36.6719    | -106.4061  | 664265.7895 | -3.9917   |
| -4.0042                |             |            |             |           |
| [13224]ENERGY: 4000000 | 3538.4315   | 5780.6697  | 5866.1864   |           |
| 373.6898               | -15234.3391 | -1885.9441 | 0.0000      | 0.0000    |
| 8683.1214              | 7121.8155   | 323.9220   | -1561.3060  | 7193.4720 |
| 324.4364               | 4.7207      | -17.6997   | 664265.7895 | -4.0489   |
| -4.0187                |             |            |             |           |
| [13274]ENERGY: 4010000 | 3515.3490   | 5775.0437  | 5893.3769   |           |
| 358.8477               | -15370.4910 | -1837.4520 | 0.0000      | 0.0000    |
| 8788.6043              | 7123.2786   | 327.8570   | -1665.3258  | 7192.1293 |
| 324.3638               | -12.8926    | 42.3276    | 664265.7895 | -5.5111   |
| -5.5303                |             |            |             |           |
| [13310]ENERGY: 4020000 | 3539.1025   | 5708.6374  | 5940.3199   |           |
| 366.9614               | -15237.5505 | -1861.1447 | 0.0000      | 0.0000    |
| 8669.3746              | 7125.7007   | 323.4091   | -1543.6739  | 7194.1655 |
| 324.4686               | 37.2294     | 7.4337     | 664265.7895 | -5.2666   |
| -5.2632                |             |            |             |           |
| [13360]ENERGY: 4030000 | 3602.4533   | 5846.2213  | 5907.3425   |           |
| 361.7065               | -15326.8881 | -1849.0353 | 0.0000      | 0.0000    |
| 8586.0457              | 7127.8460   | 320.3006   | -1458.1997  | 7193.8762 |
| 324.6113               | -14.1419    | -71.7809   | 664265.7895 | -2.0630   |
| -2.0817                |             |            |             |           |
| [13396]ENERGY: 4040000 | 3519.4142   | 5871.6486  | 5897.4332   |           |
| 360.2442               | -15355.8139 | -1867.7498 | 0.0000      | 0.0000    |
| 8694.6370              | 7119.8136   | 324.3516   | -1574.8234  | 7193.7926 |
| 324.6979               | -87.8605    | -77.7480   | 664265.7895 | -3.9963   |
| -3.9811                |             |            |             |           |
| [13446]ENERGY: 4050000 | 3560.3382   | 5721.8374  | 5912.2134   |           |
| 363.5739               | -15275.3788 | -1827.4438 | 0.0000      | 0.0000    |
| 8669.7716              | 7124.9119   | 323.4240   | -1544.8597  | 7193.3899 |
| 324.6948               | 4.9410      | 14.8554    | 664265.7895 | -3.9283   |
| -3.9303                |             |            |             |           |
| [13482]ENERGY: 4060000 | 3520.3882   | 5805.9876  | 5896.8012   |           |

## Supplementary Text 6

|                        |             |            |             |           |
|------------------------|-------------|------------|-------------|-----------|
| 346.5742               | -15341.8047 | -1821.4687 | 0.0000      | 0.0000    |
| 8715.7960              | 7122.2736   | 325.1409   | -1593.5223  | 7193.9774 |
| 324.5057               | 58.2086     | -15.1888   | 664265.7895 | -5.1093   |
| -5.1008                |             |            |             |           |
| [13532]ENERGY: 4070000 | 3505.2921   | 5882.5200  | 5889.6148   |           |
| 359.8902               | -15279.5300 | -1898.6395 | 0.0000      | 0.0000    |
| 8661.3538              | 7120.5014   | 323.1099   | -1540.8524  | 7194.7745 |
| 324.2422               | 91.8267     | 57.8456    | 664265.7895 | -1.2073   |
| -1.2204                |             |            |             |           |
| [13568]ENERGY: 4080000 | 3559.7413   | 5844.8408  | 5949.7765   |           |
| 353.9149               | -15270.2085 | -1930.8714 | 0.0000      | 0.0000    |
| 8621.9530              | 7129.1467   | 321.6401   | -1492.8063  | 7196.3959 |
| 324.2901               | -29.8871    | -92.2779   | 664265.7895 | -2.3969   |
| -2.3852                |             |            |             |           |
| [13618]ENERGY: 4090000 | 3548.5579   | 5803.5408  | 5851.6926   |           |
| 399.0557               | -15292.7562 | -1887.0363 | 0.0000      | 0.0000    |
| 8703.8447              | 7126.8992   | 324.6951   | -1576.9455  | 7195.2738 |
| 324.1638               | -106.8674   | -102.9238  | 664265.7895 | -4.2607   |
| -4.2515                |             |            |             |           |
| [13657]ENERGY: 4100000 | 3494.4054   | 5815.0023  | 5851.7537   |           |
| 357.7518               | -15360.8302 | -1786.6165 | 0.0000      | 0.0000    |
| 8755.7928              | 7127.2594   | 326.6330   | -1628.5334  | 7195.2879 |
| 324.3495               | 64.5252     | -11.0418   | 664265.7895 | -8.3428   |
| -8.3642                |             |            |             |           |
| [13707]ENERGY: 4110000 | 3502.4853   | 5742.4608  | 5916.4661   |           |
| 357.4709               | -15227.5269 | -1919.1278 | 0.0000      | 0.0000    |
| 8748.9703              | 7121.1987   | 326.3785   | -1627.7716  | 7196.8077 |
| 324.2521               | -24.3851    | -77.4099   | 664265.7895 | -12.6671  |
| -12.6521               |             |            |             |           |
| [13743]ENERGY: 4120000 | 3578.4285   | 5677.6598  | 5930.3607   |           |
| 366.8123               | -15299.3678 | -1847.4256 | 0.0000      | 0.0000    |
| 8718.3124              | 7124.7805   | 325.2348   | -1593.5320  | 7196.5983 |
| 324.3115               | 49.7438     | -6.4022    | 664265.7895 | -6.1913   |
| -6.2077                |             |            |             |           |
| [13793]ENERGY: 4130000 | 3560.8496   | 5802.5513  | 5856.8278   |           |
| 365.2955               | -15261.8696 | -1885.7300 | 0.0000      | 0.0000    |
| 8686.4039              | 7124.3285   | 324.0444   | -1562.0754  | 7196.8077 |
| 324.1467               | -78.5148    | -61.4537   | 664265.7895 | -7.6397   |
| -7.6320                |             |            |             |           |
| [13829]ENERGY: 4140000 | 3521.3722   | 5685.5096  | 5938.4382   |           |
| 347.6521               | -15283.4748 | -1821.2509 | 0.0000      | 0.0000    |
| 8733.0996              | 7121.3460   | 325.7864   | -1611.7535  | 7195.2551 |
| 324.1308               | 53.5845     | 37.1900    | 664265.7895 | 0.4196    |
| 0.4015                 |             |            |             |           |
| [13879]ENERGY: 4150000 | 3624.2458   | 5774.1320  | 5889.4958   |           |
| 343.1551               | -15304.5801 | -1927.5890 | 0.0000      | 0.0000    |
| 8727.1535              | 7126.0131   | 325.5646   | -1601.1404  | 7197.2421 |
| 324.1515               | -166.9250   | -148.3173  | 664265.7895 | -2.2426   |
| -2.2081                |             |            |             |           |
| [13915]ENERGY: 4160000 | 3561.7952   | 5764.6352  | 5850.0251   |           |
| 366.4672               | -15296.5238 | -1900.1787 | 0.0000      | 0.0000    |
| 8775.7400              | 7121.9600   | 327.3771   | -1653.7799  | 7196.9518 |
| 324.1963               | -121.7572   | -104.7966  | 664265.7895 | -7.0192   |
| -7.0162                |             |            |             |           |



## Supplementary Text 6

|                        |             |            |             |           |
|------------------------|-------------|------------|-------------|-----------|
| [13965]ENERGY: 4170000 | 3539.1420   | 5734.4967  | 5961.0525   |           |
| 358.1418               | -15278.6558 | -1782.6285 | 0.0000      | 0.0000    |
| 8599.5271              | 7131.0757   | 320.8035   | -1468.4513  | 7198.2044 |
| 324.1639               | -32.4893    | -57.5093   | 664265.7895 | -10.2287  |
| -10.2270               |             |            |             |           |
| [14001]ENERGY: 4180000 | 3639.9835   | 5780.0528  | 5877.4391   |           |
| 354.9131               | -15349.8854 | -1819.1848 | 0.0000      | 0.0000    |
| 8645.2543              | 7128.5727   | 322.5094   | -1516.6816  | 7198.6083 |
| 324.1226               | -20.7938    | -87.6297   | 664265.7895 | -7.9558   |
| -7.9924                |             |            |             |           |
| [14051]ENERGY: 4190000 | 3638.5648   | 5786.1826  | 5879.7054   |           |
| 360.9144               | -15292.6434 | -1883.8341 | 0.0000      | 0.0000    |
| 8639.6417              | 7128.5314   | 322.3000   | -1511.1103  | 7198.7788 |
| 324.2541               | 69.5663     | 68.3852    | 664265.7895 | -9.4550   |
| -9.4217                |             |            |             |           |
| [14090]ENERGY: 4200000 | 3606.7468   | 5805.6896  | 5903.8944   |           |
| 369.7508               | -15400.8199 | -1829.1063 | 0.0000      | 0.0000    |
| 8674.0960              | 7130.2513   | 323.5853   | -1543.8447  | 7197.6890 |
| 324.3237               | -21.0507    | -13.8459   | 664265.7895 | -10.1666  |
| -10.1656               |             |            |             |           |
| [14140]ENERGY: 4210000 | 3544.0225   | 5752.8356  | 5919.0343   |           |
| 336.5917               | -15309.3638 | -1845.8523 | 0.0000      | 0.0000    |
| 8730.9295              | 7128.1975   | 325.7054   | -1602.7320  | 7199.6170 |
| 324.4233               | 145.3296    | 79.3193    | 664265.7895 | -3.4475   |
| -3.4670                |             |            |             |           |
| [14176]ENERGY: 4220000 | 3513.1439   | 5805.2785  | 5882.2468   |           |
| 351.1372               | -15359.9078 | -1838.5181 | 0.0000      | 0.0000    |
| 8770.3449              | 7123.7253   | 327.1758   | -1646.6196  | 7199.9222 |
| 324.5219               | 147.0694    | 125.2313   | 664265.7895 | -5.6114   |
| -5.6129                |             |            |             |           |
| [14226]ENERGY: 4230000 | 3542.1998   | 5787.0693  | 5873.2704   |           |
| 351.1373               | -15392.9215 | -1763.3328 | 0.0000      | 0.0000    |
| 8731.7422              | 7129.1647   | 325.7358   | -1602.5775  | 7198.8758 |
| 324.5057               | -104.2529   | -70.8597   | 664265.7895 | -2.4211   |
| -2.4240                |             |            |             |           |
| [14262]ENERGY: 4240000 | 3500.7037   | 5765.1862  | 5879.0244   |           |
| 374.4382               | -15340.4592 | -1835.1631 | 0.0000      | 0.0000    |
| 8783.8255              | 7127.5557   | 327.6787   | -1656.2698  | 7197.8491 |
| 324.2761               | -59.5924    | -44.7159   | 664265.7895 | -4.1223   |
| -4.1139                |             |            |             |           |
| [14312]ENERGY: 4250000 | 3554.4995   | 5859.3244  | 5923.9348   |           |
| 335.6581               | -15316.2682 | -1890.7763 | 0.0000      | 0.0000    |
| 8664.7059              | 7131.0784   | 323.2350   | -1533.6275  | 7198.6648 |
| 324.3818               | -38.7291    | -46.0001   | 664265.7895 | -1.2859   |
| -1.2838                |             |            |             |           |
| [14348]ENERGY: 4260000 | 3598.6475   | 5794.8806  | 5914.5721   |           |
| 359.7216               | -15332.3517 | -1896.0826 | 0.0000      | 0.0000    |
| 8689.9215              | 7129.3090   | 324.1756   | -1560.6125  | 7198.8723 |
| 324.3837               | -328.8106   | -288.7415  | 664265.7895 | -3.0892   |
| -3.0758                |             |            |             |           |
| [14398]ENERGY: 4270000 | 3491.7996   | 5792.9352  | 5975.1006   |           |
| 363.0948               | -15340.7786 | -1775.1089 | 0.0000      | 0.0000    |
| 8625.6808              | 7132.7235   | 321.7792   | -1492.9573  | 7200.1452 |
| 324.4720               | 29.1149     | 61.0472    | 664265.7895 | -5.6988   |

Supplementary Text 6

-5.7052

|                        |             |            |             |
|------------------------|-------------|------------|-------------|
| [14434]ENERGY: 4280000 | 3555.2196   | 5815.2635  | 5896.2373   |
| 343.3976               | -15285.3044 | -1856.3457 | 0.0000      |
| 8664.9021              | 7133.3701   | 323.2423   | -1531.5321  |
| 324.3440               | 35.3638     | -75.5217   | 664265.7895 |

-6.1395

|                        |             |            |             |
|------------------------|-------------|------------|-------------|
| [14484]ENERGY: 4290000 | 3495.6512   | 5789.4957  | 5905.1038   |
| 331.7303               | -15351.0687 | -1804.3585 | 0.0000      |
| 8760.3419              | 7126.8957   | 326.8027   | -1633.4462  |
| 324.2630               | 169.7318    | 116.3388   | 664265.7895 |

-1.6186

|                        |             |            |             |
|------------------------|-------------|------------|-------------|
| [14523]ENERGY: 4300000 | 3591.2231   | 5794.3343  | 5887.0402   |
| 347.9219               | -15354.9469 | -1817.4840 | 0.0000      |
| 8684.9700              | 7133.0585   | 323.9909   | -1551.9115  |
| 324.3364               | -48.3450    | -40.7608   | 664265.7895 |

-5.2015

|                        |             |            |             |
|------------------------|-------------|------------|-------------|
| [14573]ENERGY: 4310000 | 3518.8929   | 5866.0601  | 5806.9819   |
| 352.6855               | -15341.9683 | -1857.4887 | 0.0000      |
| 8784.4264              | 7129.5898   | 327.7011   | -1654.8366  |
| 324.6256               | 169.1745    | 78.0889    | 664265.7895 |

-3.1966

|                        |             |            |             |
|------------------------|-------------|------------|-------------|
| [14609]ENERGY: 4320000 | 3549.7762   | 5752.6338  | 5870.0786   |
| 313.2983               | -15331.0581 | -1856.4553 | 0.0000      |
| 8827.1862              | 7125.4597   | 329.2963   | -1701.7265  |
| 324.3956               | -31.2489    | -75.9543   | 664265.7895 |

-4.1145

|                        |             |            |             |
|------------------------|-------------|------------|-------------|
| [14659]ENERGY: 4330000 | 3601.9722   | 5878.6497  | 5888.7810   |
| 347.8142               | -15404.5894 | -1826.9746 | 0.0000      |
| 8647.8302              | 7133.4833   | 322.6054   | -1514.3469  |
| 324.4019               | 134.4470    | 161.6235   | 664265.7895 |

-4.2263

|                        |             |            |             |
|------------------------|-------------|------------|-------------|
| [14695]ENERGY: 4340000 | 3616.2680   | 5836.2125  | 5856.1133   |
| 354.6700               | -15366.4006 | -1853.0754 | 0.0000      |
| 8686.9258              | 7130.7137   | 324.0639   | -1556.2121  |
| 324.2116               | 93.0799     | 12.5087    | 664265.7895 |

-1.4922

|                        |             |            |             |
|------------------------|-------------|------------|-------------|
| [14745]ENERGY: 4350000 | 3613.1157   | 5786.2640  | 5917.4739   |
| 348.5350               | -15401.7845 | -1826.0492 | 0.0000      |
| 8695.0913              | 7132.6462   | 324.3685   | -1562.4450  |
| 324.3030               | -29.5856    | 17.4837    | 664265.7895 |

0.7088

|                        |             |            |             |
|------------------------|-------------|------------|-------------|
| [14781]ENERGY: 4360000 | 3548.4285   | 5991.9637  | 5888.5449   |
| 337.5427               | -15515.3551 | -1819.9171 | 0.0000      |
| 8701.1161              | 7132.3236   | 324.5933   | -1568.7925  |
| 324.5275               | -23.1518    | -42.6686   | 664265.7895 |

2.1815

|                        |             |            |             |
|------------------------|-------------|------------|-------------|
| [14831]ENERGY: 4370000 | 3492.9641   | 5726.2909  | 5908.1030   |
| 366.2652               | -15311.0092 | -1824.0599 | 0.0000      |
| 8772.1032              | 7130.6574   | 327.2414   | -1641.4458  |
| 324.4604               | 150.3517    | 111.7589   | 664265.7895 |

-1.3331

|                        |             |            |            |
|------------------------|-------------|------------|------------|
| [14867]ENERGY: 4380000 | 3620.6401   | 5825.8771  | 5891.4482  |
| 355.3346               | -15326.5137 | -1868.1912 | 0.0000     |
| 8638.3970              | 7136.9922   | 322.2535   | -1501.4048 |

## Supplementary Text 6

|                        |             |            |             |           |
|------------------------|-------------|------------|-------------|-----------|
| 324.4802               | -62.5475    | -179.7568  | 664265.7895 | 0.0142    |
| 0.0167                 |             |            |             |           |
| [14917]ENERGY: 4390000 | 3579.6912   | 5782.5421  | 5869.1859   |           |
| 360.4449               | -15389.9123 | -1783.2065 | 0.0000      | 0.0000    |
| 8716.1494              | 7134.8948   | 325.1541   | -1581.2546  | 7204.2977 |
| 324.4801               | 39.1114     | 96.7703    | 664265.7895 | 7.2166    |
| 7.2082                 |             |            |             |           |
| [14956]ENERGY: 4400000 | 3572.5061   | 5821.7227  | 5878.8142   |           |
| 373.2556               | -15358.3855 | -1904.1338 | 0.0000      | 0.0000    |
| 8750.0225              | 7133.8018   | 326.4177   | -1616.2208  | 7205.1321 |
| 324.4394               | -86.3726    | -67.9674   | 664265.7895 | 2.2479    |
| 2.2258                 |             |            |             |           |
| [15006]ENERGY: 4410000 | 3630.6230   | 5848.5748  | 5878.9763   |           |
| 386.3063               | -15375.6796 | -1846.0735 | 0.0000      | 0.0000    |
| 8614.0970              | 7136.8243   | 321.3470   | -1477.2727  | 7205.5897 |
| 324.5647               | -115.7350   | -144.6111  | 664265.7895 | 5.6993    |
| 5.7149                 |             |            |             |           |
| [15042]ENERGY: 4420000 | 3516.5079   | 5864.9428  | 5899.5241   |           |
| 351.9056               | -15352.5579 | -1857.1450 | 0.0000      | 0.0000    |
| 8714.4341              | 7137.6116   | 325.0901   | -1576.8225  | 7206.2639 |
| 324.3518               | -64.1675    | -83.7518   | 664265.7895 | 4.7744    |
| 4.7851                 |             |            |             |           |
| [15092]ENERGY: 4430000 | 3494.7449   | 5804.2980  | 5925.2921   |           |
| 354.2994               | -15351.9011 | -1837.5205 | 0.0000      | 0.0000    |
| 8746.0408              | 7135.2537   | 326.2692   | -1610.7871  | 7204.5644 |
| 324.4356               | 128.0426    | 84.0510    | 664265.7895 | -0.4826   |
| -0.4971                |             |            |             |           |
| [15128]ENERGY: 4440000 | 3558.4920   | 5719.5939  | 5878.4285   |           |
| 343.7676               | -15323.4775 | -1821.8675 | 0.0000      | 0.0000    |
| 8781.1026              | 7136.0394   | 327.5771   | -1645.0631  | 7205.2390 |
| 324.7783               | 133.3112    | 109.7472   | 664265.7895 | 0.8620    |
| 0.8741                 |             |            |             |           |
| [15178]ENERGY: 4450000 | 3654.8530   | 5846.1286  | 5943.7663   |           |
| 359.9060               | -15422.0181 | -1841.8376 | 0.0000      | 0.0000    |
| 8598.2820              | 7139.0802   | 320.7571   | -1459.2018  | 7206.2273 |
| 324.7043               | -33.3974    | -27.9169   | 664265.7895 | 4.9449    |
| 4.9366                 |             |            |             |           |
| [15214]ENERGY: 4460000 | 3658.8873   | 5844.8193  | 5929.5034   |           |
| 327.9396               | -15336.4355 | -1907.8206 | 0.0000      | 0.0000    |
| 8619.3896              | 7136.2832   | 321.5445   | -1483.1064  | 7205.4455 |
| 324.8990               | -64.0157    | -154.4767  | 664265.7895 | 0.4938    |
| 0.4940                 |             |            |             |           |
| [15264]ENERGY: 4470000 | 3549.8023   | 5780.3541  | 5919.9163   |           |
| 342.0773               | -15245.6161 | -1922.8400 | 0.0000      | 0.0000    |
| 8713.0975              | 7136.7914   | 325.0402   | -1576.3062  | 7205.1440 |
| 324.8812               | 44.9551     | 13.6383    | 664265.7895 | 1.6307    |
| 1.6283                 |             |            |             |           |
| [15300]ENERGY: 4480000 | 3481.9067   | 5855.5689  | 5905.6759   |           |
| 367.0816               | -15284.9669 | -1866.1601 | 0.0000      | 0.0000    |
| 8677.1483              | 7136.2543   | 323.6991   | -1540.8940  | 7205.1452 |
| 324.7310               | -43.2312    | -31.9284   | 664265.7895 | 2.5373    |
| 2.5542                 |             |            |             |           |
| [15350]ENERGY: 4490000 | 3535.2952   | 5789.1444  | 5924.6056   |           |
| 349.6779               | -15294.9234 | -1894.4020 | 0.0000      | 0.0000    |

## Supplementary Text 6

|                        |             |            |             |           |
|------------------------|-------------|------------|-------------|-----------|
| 8724.8976              | 7134.2954   | 325.4804   | -1590.6023  | 7205.9258 |
| 324.8039               | 133.0136    | 101.6882   | 664265.7895 | 2.9458    |
| 2.9381                 |             |            |             |           |
| [15389]ENERGY: 4500000 | 3623.1912   | 5733.1270  | 5933.8125   |           |
| 357.3000               | -15365.6154 | -1929.7930 | 0.0000      | 0.0000    |
| 8784.4889              | 7136.5111   | 327.7035   | -1647.9778  | 7206.7418 |
| 325.0819               | -55.8410    | -128.5019  | 664265.7895 | 0.1149    |
| 0.1209                 |             |            |             |           |
| [15439]ENERGY: 4510000 | 3637.1362   | 5671.7559  | 5916.4437   |           |
| 361.8849               | -15375.5767 | -1821.2861 | 0.0000      | 0.0000    |
| 8746.5040              | 7136.8620   | 326.2864   | -1609.6421  | 7207.0738 |
| 325.2487               | -31.2945    | -6.6463    | 664265.7895 | 0.9998    |
| 0.9945                 |             |            |             |           |
| [15475]ENERGY: 4520000 | 3580.7192   | 5734.6696  | 5894.6503   |           |
| 367.0834               | -15285.3078 | -1826.5222 | 0.0000      | 0.0000    |
| 8671.6044              | 7136.8969   | 323.4923   | -1534.7075  | 7207.4422 |
| 325.2800               | 58.6930     | 6.1764     | 664265.7895 | 3.0496    |
| 3.0407                 |             |            |             |           |
| [15525]ENERGY: 4530000 | 3634.7127   | 5810.9502  | 5887.3970   |           |
| 343.7359               | -15396.6174 | -1794.4982 | 0.0000      | 0.0000    |
| 8656.3418              | 7142.0220   | 322.9230   | -1514.3198  | 7208.0636 |
| 325.1602               | -84.9806    | -81.5641   | 664265.7895 | -2.1191   |
| -2.1136                |             |            |             |           |
| [15561]ENERGY: 4540000 | 3552.2232   | 5892.1915  | 5921.7053   |           |
| 363.1032               | -15390.2802 | -1894.2454 | 0.0000      | 0.0000    |
| 8695.6037              | 7140.3012   | 324.3876   | -1555.3025  | 7209.7520 |
| 325.3134               | 3.7544      | -17.6213   | 664265.7895 | 3.4444    |
| 3.4381                 |             |            |             |           |
| [15611]ENERGY: 4550000 | 3550.9623   | 5843.0967  | 5879.7965   |           |
| 372.1268               | -15358.8975 | -1814.2054 | 0.0000      | 0.0000    |
| 8669.6036              | 7142.4830   | 323.4177   | -1527.1206  | 7210.1755 |
| 325.3010               | 78.3915     | 104.6143   | 664265.7895 | 0.1726    |
| 0.1769                 |             |            |             |           |
| [15647]ENERGY: 4560000 | 3509.9204   | 5835.7054  | 5850.2881   |           |
| 353.3244               | -15269.6437 | -1845.0444 | 0.0000      | 0.0000    |
| 8709.6770              | 7144.2272   | 324.9126   | -1565.4498  | 7211.1404 |
| 325.2043               | 98.7465     | 28.3995    | 664265.7895 | -2.7355   |
| -2.7336                |             |            |             |           |
| [15697]ENERGY: 4570000 | 3521.5817   | 5826.8144  | 5901.7679   |           |
| 358.1749               | -15432.4204 | -1821.3882 | 0.0000      | 0.0000    |
| 8786.1491              | 7140.6794   | 327.7654   | -1645.4697  | 7211.7992 |
| 325.2450               | 98.4320     | 42.7134    | 664265.7895 | 3.2972    |
| 3.3009                 |             |            |             |           |
| [15733]ENERGY: 4580000 | 3560.6526   | 5851.9458  | 5849.0131   |           |
| 329.6232               | -15392.8802 | -1785.6706 | 0.0000      | 0.0000    |
| 8730.2450              | 7142.9291   | 325.6799   | -1587.3160  | 7211.0689 |
| 325.3819               | 131.2670    | 196.8507   | 664265.7895 | 2.9653    |
| 2.9672                 |             |            |             |           |
| [15783]ENERGY: 4590000 | 3572.1145   | 5889.5702  | 5848.7773   |           |
| 366.8831               | -15417.8091 | -1855.8713 | 0.0000      | 0.0000    |
| 8738.1685              | 7141.8331   | 325.9755   | -1596.3354  | 7212.8084 |
| 325.3052               | 45.4559     | 125.1921   | 664265.7895 | 3.2191    |
| 3.2197                 |             |            |             |           |
| [15822]ENERGY: 4600000 | 3632.5119   | 5873.3700  | 5938.0283   |           |

## Supplementary Text 6

|                        |             |            |             |           |
|------------------------|-------------|------------|-------------|-----------|
| 363.1742               | -15434.7200 | -1943.7762 | 0.0000      | 0.0000    |
| 8711.5647              | 7140.1530   | 324.9830   | -1571.4117  | 7211.8994 |
| 325.3425               | -92.3675    | -49.9434   | 664265.7895 | -4.3651   |
| -4.3471                |             |            |             |           |
| [15872]ENERGY: 4610000 | 3510.7213   | 5830.5180  | 5878.9142   |           |
| 354.8244               | -15370.9695 | -1837.9750 | 0.0000      | 0.0000    |
| 8775.6642              | 7141.6976   | 327.3743   | -1633.9666  | 7213.9071 |
| 325.3875               | 140.7721    | 120.1191   | 664265.7895 | 0.2490    |
| 0.2461                 |             |            |             |           |
| [15908]ENERGY: 4620000 | 3664.1266   | 5840.0874  | 5871.7884   |           |
| 367.1577               | -15369.2178 | -1890.0015 | 0.0000      | 0.0000    |
| 8661.0158              | 7144.9566   | 323.0973   | -1516.0592  | 7215.2233 |
| 325.3668               | -134.5958   | -123.0243  | 664265.7895 | -1.3672   |
| -1.3670                |             |            |             |           |
| [15958]ENERGY: 4630000 | 3563.1877   | 5881.6920  | 5884.6758   |           |
| 358.7816               | -15343.1826 | -1849.7764 | 0.0000      | 0.0000    |
| 8651.9169              | 7147.2950   | 322.7579   | -1504.6219  | 7215.6574 |
| 325.4247               | -88.4961    | 13.8113    | 664265.7895 | -0.0501   |
| -0.0688                |             |            |             |           |
| [15994]ENERGY: 4640000 | 3567.9812   | 5691.7022  | 5919.8409   |           |
| 385.7403               | -15360.5236 | -1819.9666 | 0.0000      | 0.0000    |
| 8765.0091              | 7149.7835   | 326.9768   | -1615.2256  | 7215.7251 |
| 325.3982               | 155.8447    | 111.1720   | 664265.7895 | 3.4643    |
| 3.4641                 |             |            |             |           |
| [16044]ENERGY: 4650000 | 3501.7708   | 5813.2325  | 5886.8743   |           |
| 348.6991               | -15357.4649 | -1882.6271 | 0.0000      | 0.0000    |
| 8832.2645              | 7142.7491   | 329.4857   | -1689.5154  | 7215.1713 |
| 324.9952               | 5.8629      | -14.7444   | 664265.7895 | 2.1391    |
| 2.1364                 |             |            |             |           |
| [16080]ENERGY: 4660000 | 3579.6132   | 5774.1666  | 5907.5681   |           |
| 345.9664               | -15285.9789 | -1904.8324 | 0.0000      | 0.0000    |
| 8728.2669              | 7144.7700   | 325.6061   | -1583.4969  | 7216.4014 |
| 325.3173               | -172.9402   | -172.3828  | 664265.7895 | 3.8064    |
| 3.8265                 |             |            |             |           |
| [16130]ENERGY: 4670000 | 3554.6016   | 5836.4200  | 5871.5629   |           |
| 380.4518               | -15392.9175 | -1875.8201 | 0.0000      | 0.0000    |
| 8771.9272              | 7146.2259   | 327.2349   | -1625.7013  | 7218.3345 |
| 325.2329               | -18.4544    | -206.4823  | 664265.7895 | 7.3868    |
| 7.3720                 |             |            |             |           |
| [16166]ENERGY: 4680000 | 3593.8693   | 5821.6716  | 5862.9004   |           |
| 372.9955               | -15353.8263 | -1917.8266 | 0.0000      | 0.0000    |
| 8764.7150              | 7144.4990   | 326.9658   | -1620.2161  | 7218.1217 |
| 325.3727               | 107.9638    | 57.6981    | 664265.7895 | -1.7386   |
| -1.7344                |             |            |             |           |
| [16216]ENERGY: 4690000 | 3498.8230   | 5872.2866  | 5880.6574   |           |
| 365.2779               | -15331.4133 | -1852.3850 | 0.0000      | 0.0000    |
| 8719.0376              | 7152.2842   | 325.2618   | -1566.7534  | 7218.2330 |
| 325.3900               | 119.6532    | -10.5751   | 664265.7895 | 1.7614    |
| 1.7664                 |             |            |             |           |
| [16255]ENERGY: 4700000 | 3674.6757   | 5833.0849  | 5915.9268   |           |
| 332.6950               | -15433.1379 | -1773.4438 | 0.0000      | 0.0000    |
| 8598.8367              | 7148.6375   | 320.7778   | -1450.1992  | 7217.2626 |
| 325.2167               | -175.7204   | -55.9543   | 664265.7895 | 0.3939    |
| 0.3864                 |             |            |             |           |

## Supplementary Text 6

|                        |             |            |             |           |
|------------------------|-------------|------------|-------------|-----------|
| [16305]ENERGY: 4710000 | 3669.7337   | 5842.6078  | 5958.8435   |           |
| 364.6703               | -15425.5701 | -1877.7738 | 0.0000      | 0.0000    |
| 8616.1795              | 7148.6909   | 321.4247   | -1467.4886  | 7219.6510 |
| 325.2603               | -78.1050    | -111.9459  | 664265.7895 | 1.8050    |
| 1.8081                 |             |            |             |           |
| [16341]ENERGY: 4720000 | 3574.2354   | 5786.5469  | 5941.3564   |           |
| 377.3238               | -15306.7291 | -1897.3015 | 0.0000      | 0.0000    |
| 8673.5846              | 7149.0166   | 323.5662   | -1524.5681  | 7220.5994 |
| 325.2986               | 117.5766    | 109.8509   | 664265.7895 | -1.4507   |
| -1.4483                |             |            |             |           |
| [16391]ENERGY: 4730000 | 3566.4381   | 5762.0214  | 5938.0959   |           |
| 362.4394               | -15365.1235 | -1850.9441 | 0.0000      | 0.0000    |
| 8736.2620              | 7149.1894   | 325.9044   | -1587.0727  | 7219.4891 |
| 325.3628               | 25.7897     | 36.0569    | 664265.7895 | 1.0161    |
| 1.0245                 |             |            |             |           |
| [16427]ENERGY: 4740000 | 3500.5751   | 5843.6665  | 5934.2892   |           |
| 377.6441               | -15390.8303 | -1837.2289 | 0.0000      | 0.0000    |
| 8720.3698              | 7148.4854   | 325.3115   | -1571.8844  | 7221.7718 |
| 325.2424               | 79.6736     | 33.1785    | 664265.7895 | 2.4125    |
| 2.4108                 |             |            |             |           |
| [16477]ENERGY: 4750000 | 3606.7618   | 5824.5672  | 5919.2397   |           |
| 350.7917               | -15289.0708 | -1888.8883 | 0.0000      | 0.0000    |
| 8630.6446              | 7154.0459   | 321.9643   | -1476.5987  | 7223.1741 |
| 325.2627               | -156.4654   | -202.5637  | 664265.7895 | -0.6993   |
| -0.7169                |             |            |             |           |
| [16513]ENERGY: 4760000 | 3631.1309   | 5900.3303  | 5911.7453   |           |
| 367.6950               | -15373.7929 | -1917.7374 | 0.0000      | 0.0000    |
| 8634.0407              | 7153.4119   | 322.0910   | -1480.6288  | 7223.4673 |
| 325.4676               | -131.5374   | -99.4231   | 664265.7895 | 5.9509    |
| 5.9671                 |             |            |             |           |
| [16563]ENERGY: 4770000 | 3545.2967   | 5877.6883  | 5901.2695   |           |
| 364.3491               | -15349.0851 | -1902.8301 | 0.0000      | 0.0000    |
| 8715.8625              | 7152.5508   | 325.1434   | -1563.3117  | 7222.1692 |
| 325.6828               | 64.5911     | 75.8363    | 664265.7895 | 2.3101    |
| 2.2863                 |             |            |             |           |
| [16599]ENERGY: 4780000 | 3550.8810   | 5804.4613  | 5947.9790   |           |
| 354.2607               | -15339.3092 | -1891.7231 | 0.0000      | 0.0000    |
| 8723.1576              | 7149.7073   | 325.4155   | -1573.4504  | 7222.0396 |
| 325.2294               | -69.9145    | -96.0611   | 664265.7895 | 6.4223    |
| 6.4276                 |             |            |             |           |
| [16649]ENERGY: 4790000 | 3553.2805   | 5825.9630  | 5892.3647   |           |
| 367.2461               | -15394.0924 | -1827.7825 | 0.0000      | 0.0000    |
| 8732.2959              | 7149.2753   | 325.7564   | -1583.0206  | 7219.9185 |
| 325.0341               | -39.9719    | -127.4632  | 664265.7895 | 4.1638    |
| 4.1738                 |             |            |             |           |
| [16688]ENERGY: 4800000 | 3545.6241   | 5785.9262  | 5908.3131   |           |
| 350.2529               | -15315.2404 | -1870.0188 | 0.0000      | 0.0000    |
| 8743.5234              | 7148.3805   | 326.1753   | -1595.1429  | 7219.5821 |
| 325.4660               | 8.3265      | 80.5619    | 664265.7895 | -1.5605   |
| -1.5691                |             |            |             |           |
| [16738]ENERGY: 4810000 | 3586.2725   | 5827.3868  | 5938.9677   |           |
| 371.4616               | -15313.1386 | -1951.4208 | 0.0000      | 0.0000    |
| 8694.6311              | 7154.1603   | 324.3513   | -1540.4708  | 7221.2525 |
| 325.5578               | 110.0088    | 0.1888     | 664265.7895 | 5.4883    |

Supplementary Text 6

5.4961  
 [16774]ENERGY: 4820000      3523.0029      5800.1277      5889.3304  
 338.8424      -15296.8805      -1880.0696      0.0000      0.0000  
 8773.6311      7147.9843      327.2984      -1625.6467      7220.1798  
 325.5196      145.6794      38.4857      664265.7895      -3.5050  
 -3.5139  
 [16824]ENERGY: 4830000      3545.2815      5849.6338      5920.9170  
 361.8880      -15385.8764      -1902.2666      0.0000      0.0000  
 8760.1199      7149.6971      326.7944      -1610.4228      7220.3004  
 325.5341      113.8702      36.5727      664265.7895      -3.4930  
 -3.4869  
 [16860]ENERGY: 4840000      3585.1081      5762.7664      5946.2891  
 372.9907      -15380.6042      -1819.9665      0.0000      0.0000  
 8683.9982      7150.5819      323.9547      -1533.4163      7219.3184  
 325.5367      182.6570      170.4175      664265.7895      -8.5970  
 -8.5868  
 [16910]ENERGY: 4850000      3579.5807      5901.1382      5862.3723  
 350.8024      -15403.5832      -1808.8754      0.0000      0.0000  
 8669.2771      7150.7120      323.4055      -1518.5651      7219.9197  
 325.5784      42.1689      -20.7055      664265.7895      -5.7761  
 -5.7924  
 [16946]ENERGY: 4860000      3562.4498      5876.6689      5928.6409  
 371.1602      -15292.1776      -1949.6512      0.0000      0.0000  
 8655.4695      7152.5604      322.8904      -1502.9091      7220.0666  
 325.3863      21.8882      -34.2694      664265.7895      -5.8093  
 -5.7837  
 [16996]ENERGY: 4870000      3597.6715      5854.6409      5872.9984  
 372.5629      -15400.3971      -1808.4059      0.0000      0.0000  
 8662.2325      7151.3035      323.1427      -1510.9291      7219.5433  
 325.3986      63.8063      53.7480      664265.7895      -5.9365  
 -5.9487  
 [17032]ENERGY: 4880000      3608.4066      5902.5546      5869.8841  
 398.6309      -15423.9008      -1901.4542      0.0000      0.0000  
 8696.3796      7150.5009      324.4166      -1545.8788      7220.7181  
 325.3717      -1.0153      -57.6000      664265.7895      -5.2730  
 -5.2709  
 [17082]ENERGY: 4890000      3604.5569      5827.7458      5925.2903  
 349.5487      -15353.4759      -1894.4527      0.0000      0.0000  
 8692.6492      7151.8622      324.2774      -1540.7870      7219.4111  
 325.1977      -112.3644      -55.2162      664265.7895      -8.6009  
 -8.6130  
 [17121]ENERGY: 4900000      3540.6317      5797.4625      5914.2675  
 359.5564      -15303.1436      -1853.3269      0.0000      0.0000  
 8694.1386      7149.5861      324.3330      -1544.5524      7219.3443  
 325.0875      -174.3050      -172.3587      664265.7895      -4.5147  
 -4.5088  
 [17171]ENERGY: 4910000      3551.0258      5835.5825      5877.7193  
 355.1205      -15269.3047      -1879.7221      0.0000      0.0000  
 8680.7039      7151.1252      323.8318      -1529.5787      7221.0009  
 325.3882      63.3047      0.0557      664265.7895      -7.6435  
 -7.6271  
 [17207]ENERGY: 4920000      3593.1312      5730.6083      5859.3136  
 352.6838      -15325.0472      -1801.3832      0.0000      0.0000  
 8743.5205      7152.8269      326.1751      -1590.6936      7219.9150

## Supplementary Text 6

|                        |             |            |             |           |
|------------------------|-------------|------------|-------------|-----------|
| 325.6288               | 44.3795     | 22.4948    | 664265.7895 | -6.0877   |
| -6.1028                |             |            |             |           |
| [17257]ENERGY: 4930000 | 3527.8462   | 5825.0938  | 5865.1057   |           |
| 367.8140               | -15388.1485 | -1838.1541 | 0.0000      | 0.0000    |
| 8787.6071              | 7147.1641   | 327.8198   | -1640.4429  | 7220.4936 |
| 325.6120               | 18.1659     | 41.7459    | 664265.7895 | -4.8388   |
| -4.8414                |             |            |             |           |
| [17293]ENERGY: 4940000 | 3523.1400   | 5765.6867  | 5888.0046   |           |
| 364.5388               | -15312.1147 | -1876.7836 | 0.0000      | 0.0000    |
| 8797.7724              | 7150.2442   | 328.1990   | -1647.5282  | 7221.5815 |
| 325.5262               | 72.1095     | -19.9579   | 664265.7895 | -6.4418   |
| -6.4555                |             |            |             |           |
| [17343]ENERGY: 4950000 | 3541.4163   | 5768.9054  | 5931.3782   |           |
| 374.8524               | -15365.2395 | -1823.8757 | 0.0000      | 0.0000    |
| 8724.5209              | 7151.9580   | 325.4664   | -1572.5629  | 7219.7412 |
| 325.2767               | 47.1668     | 67.9101    | 664265.7895 | -2.1530   |
| -2.0958                |             |            |             |           |
| [17379]ENERGY: 4960000 | 3596.8323   | 5791.7119  | 5841.4020   |           |
| 348.6549               | -15442.8638 | -1765.8544 | 0.0000      | 0.0000    |
| 8779.6459              | 7149.5289   | 327.5228   | -1630.1171  | 7221.0890 |
| 325.4141               | 14.3528     | 54.2734    | 664265.7895 | -1.3726   |
| -1.4190                |             |            |             |           |
| [17429]ENERGY: 4970000 | 3564.0597   | 5839.2755  | 5906.5006   |           |
| 345.6006               | -15352.6815 | -1847.4281 | 0.0000      | 0.0000    |
| 8696.0358              | 7151.3625   | 324.4037   | -1544.6733  | 7221.0222 |
| 325.3946               | -161.0456   | -107.6510  | 664265.7895 | -5.2313   |
| -5.2360                |             |            |             |           |
| [17465]ENERGY: 4980000 | 3575.1688   | 5892.3186  | 5856.8577   |           |
| 349.8371               | -15373.8912 | -1852.7188 | 0.0000      | 0.0000    |
| 8705.3985              | 7152.9706   | 324.7530   | -1552.4279  | 7221.0401 |
| 325.5431               | 5.8616      | -51.9821   | 664265.7895 | -2.0269   |
| -2.0424                |             |            |             |           |
| [17515]ENERGY: 4990000 | 3586.2962   | 5827.8222  | 5875.9667   |           |
| 367.3646               | -15346.2398 | -1794.4553 | 0.0000      | 0.0000    |
| 8635.4241              | 7152.1787   | 322.1426   | -1483.2454  | 7222.8874 |
| 325.5497               | 140.3181    | 43.2201    | 664265.7895 | -0.6358   |
| -0.6179                |             |            |             |           |
| [17554]ENERGY: 5000000 | 3584.5100   | 5857.5275  | 5798.9922   |           |
| 353.9776               | -15403.8172 | -1781.8114 | 0.0000      | 0.0000    |
| 8742.4577              | 7151.8364   | 326.1355   | -1590.6213  | 7222.6743 |
| 325.6278               | -36.5670    | -49.9545   | 664265.7895 | -9.6049   |
| -9.5996                |             |            |             |           |
| [17604]ENERGY: 5010000 | 3535.7806   | 5880.6962  | 5877.4896   |           |
| 350.1832               | -15480.2317 | -1775.2016 | 0.0000      | 0.0000    |
| 8761.9766              | 7150.6929   | 326.8636   | -1611.2837  | 7223.7638 |
| 325.6858               | 70.2552     | -16.7862   | 664265.7895 | -1.4385   |
| -1.4486                |             |            |             |           |
| [17640]ENERGY: 5020000 | 3632.6518   | 5778.8087  | 5859.0296   |           |
| 356.8833               | -15392.3966 | -1819.6524 | 0.0000      | 0.0000    |
| 8740.2642              | 7155.5884   | 326.0537   | -1584.6757  | 7222.6080 |
| 325.7071               | 112.7121    | 48.7550    | 664265.7895 | -4.4379   |
| -4.4173                |             |            |             |           |
| [17690]ENERGY: 5030000 | 3520.9160   | 5882.8502  | 5878.5480   |           |
| 325.2511               | -15416.0907 | -1894.4824 | 0.0000      | 0.0000    |



## Supplementary Text 6

|                        |             |            |             |           |
|------------------------|-------------|------------|-------------|-----------|
| 8855.2872              | 7152.2794   | 330.3446   | -1703.0078  | 7224.0353 |
| 325.7000               | -54.2144    | -67.2177   | 664265.7895 | -1.8757   |
| -1.8914                |             |            |             |           |
| [17726]ENERGY: 5040000 | 3606.3149   | 5838.4676  | 5945.5256   |           |
| 359.4995               | -15414.9391 | -1787.2874 | 0.0000      | 0.0000    |
| 8603.6597              | 7151.2407   | 320.9577   | -1452.4190  | 7224.7729 |
| 325.5981               | 38.9623     | 4.4774     | 664265.7895 | -0.2994   |
| -0.2904                |             |            |             |           |
| [17776]ENERGY: 5050000 | 3431.0623   | 5778.8496  | 5921.1241   |           |
| 368.5432               | -15286.4740 | -1827.8442 | 0.0000      | 0.0000    |
| 8769.6920              | 7154.9529   | 327.1515   | -1614.7390  | 7225.1905 |
| 325.3003               | 87.3478     | 20.9883    | 664265.7895 | -1.5699   |
| -1.5697                |             |            |             |           |
| [17812]ENERGY: 5060000 | 3594.0193   | 5711.0695  | 5930.6014   |           |
| 366.3337               | -15350.5720 | -1870.4295 | 0.0000      | 0.0000    |
| 8775.3995              | 7156.4220   | 327.3644   | -1618.9775  | 7226.6591 |
| 325.5093               | -98.5946    | -129.4195  | 664265.7895 | 0.4059    |
| 0.4104                 |             |            |             |           |
| [17862]ENERGY: 5070000 | 3421.3748   | 5849.5440  | 5844.6690   |           |
| 369.1085               | -15304.5886 | -1810.5798 | 0.0000      | 0.0000    |
| 8783.5897              | 7153.1175   | 327.6699   | -1630.4722  | 7224.7149 |
| 325.7573               | 76.9816     | 45.4978    | 664265.7895 | -3.7090   |
| -3.7112                |             |            |             |           |
| [17898]ENERGY: 5080000 | 3556.5440   | 5811.2949  | 5942.6142   |           |
| 383.4370               | -15377.8675 | -1886.0233 | 0.0000      | 0.0000    |
| 8728.5904              | 7158.5897   | 325.6182   | -1570.0006  | 7228.1841 |
| 325.7134               | 64.2490     | -45.0436   | 664265.7895 | -3.9763   |
| -3.9907                |             |            |             |           |
| [17948]ENERGY: 5090000 | 3484.6293   | 5759.2343  | 5885.9685   |           |
| 360.7443               | -15319.8216 | -1817.9833 | 0.0000      | 0.0000    |
| 8802.6114              | 7155.3829   | 328.3795   | -1647.2285  | 7226.3902 |
| 325.6823               | -42.6814    | -26.0989   | 664265.7895 | -1.4122   |
| -1.3881                |             |            |             |           |
| [17987]ENERGY: 5100000 | 3572.6411   | 5774.9003  | 5912.6094   |           |
| 365.2444               | -15440.5304 | -1771.6272 | 0.0000      | 0.0000    |
| 8744.3106              | 7157.5482   | 326.2046   | -1586.7624  | 7227.1373 |
| 325.8616               | 27.9792     | 47.1570    | 664265.7895 | 0.4225    |
| 0.4077                 |             |            |             |           |
| [18037]ENERGY: 5110000 | 3561.0995   | 5918.5762  | 5891.2221   |           |
| 343.5620               | -15368.3315 | -1878.9005 | 0.0000      | 0.0000    |
| 8688.1782              | 7155.4061   | 324.1106   | -1532.7721  | 7228.1567 |
| 325.8572               | -23.5489    | -79.8572   | 664265.7895 | 0.3544    |
| 0.3574                 |             |            |             |           |
| [18073]ENERGY: 5120000 | 3605.8797   | 5803.6826  | 5871.4593   |           |
| 359.9897               | -15362.5654 | -1857.3075 | 0.0000      | 0.0000    |
| 8734.2882              | 7155.4267   | 325.8307   | -1578.8615  | 7228.2411 |
| 325.8457               | -145.2894   | -35.9133   | 664265.7895 | 1.2596    |
| 1.2544                 |             |            |             |           |
| [18123]ENERGY: 5130000 | 3574.7445   | 5780.8257  | 5907.5075   |           |
| 338.9331               | -15388.3512 | -1867.1785 | 0.0000      | 0.0000    |
| 8813.3129              | 7159.7940   | 328.7787   | -1653.5189  | 7228.1867 |
| 325.6725               | 0.0814      | 34.8352    | 664265.7895 | -3.1694   |
| -3.1659                |             |            |             |           |
| [18159]ENERGY: 5140000 | 3532.1929   | 5913.3631  | 5853.6048   |           |

## Supplementary Text 6

|                        |             |            |             |           |
|------------------------|-------------|------------|-------------|-----------|
| 366.3946               | -15458.0395 | -1766.5142 | 0.0000      | 0.0000    |
| 8719.2012              | 7160.2029   | 325.2679   | -1558.9983  | 7228.8432 |
| 325.6126               | 54.4405     | 22.8892    | 664265.7895 | -2.4236   |
| -2.4310                |             |            |             |           |
| [18209]ENERGY: 5150000 | 3591.7217   | 5756.1877  | 5853.7822   |           |
| 367.1807               | -15320.6487 | -1830.2251 | 0.0000      | 0.0000    |
| 8738.4292              | 7156.4277   | 325.9852   | -1582.0014  | 7228.7642 |
| 325.7718               | 34.2132     | -58.8502   | 664265.7895 | 0.2528    |
| 0.2474                 |             |            |             |           |
| [18245]ENERGY: 5160000 | 3616.2296   | 5885.4494  | 5884.6857   |           |
| 358.3949               | -15415.5808 | -1829.9918 | 0.0000      | 0.0000    |
| 8658.5143              | 7157.7011   | 323.0040   | -1500.8131  | 7226.8059 |
| 325.6343               | 9.5565      | -37.8399   | 664265.7895 | -0.5946   |
| -0.5650                |             |            |             |           |
| [18295]ENERGY: 5170000 | 3607.5074   | 5814.0829  | 5903.2682   |           |
| 365.3298               | -15392.4167 | -1840.7738 | 0.0000      | 0.0000    |
| 8701.7175              | 7158.7152   | 324.6157   | -1543.0023  | 7228.5308 |
| 325.5233               | 83.4770     | 55.4774    | 664265.7895 | 2.7499    |
| 2.7457                 |             |            |             |           |
| [18331]ENERGY: 5180000 | 3623.7982   | 5810.2175  | 5868.3705   |           |
| 361.9740               | -15372.8696 | -1826.5828 | 0.0000      | 0.0000    |
| 8696.3061              | 7161.2138   | 324.4138   | -1535.0923  | 7227.4756 |
| 325.4867               | 99.4158     | 68.0113    | 664265.7895 | 2.5069    |
| 2.5140                 |             |            |             |           |
| [18381]ENERGY: 5190000 | 3618.4204   | 5789.1598  | 5858.4761   |           |
| 372.0897               | -15402.1128 | -1865.1833 | 0.0000      | 0.0000    |
| 8786.5684              | 7157.4184   | 327.7810   | -1629.1501  | 7228.0339 |
| 325.6125               | 88.6907     | 5.2505     | 664265.7895 | 0.8468    |
| 0.8203                 |             |            |             |           |
| [18420]ENERGY: 5200000 | 3611.0965   | 5789.5797  | 5875.9002   |           |
| 363.5753               | -15380.2988 | -1775.6356 | 0.0000      | 0.0000    |
| 8673.0609              | 7157.2782   | 323.5467   | -1515.7827  | 7227.9773 |
| 325.3849               | 187.6317    | 141.9674   | 664265.7895 | 0.0930    |
| 0.1133                 |             |            |             |           |
| [18470]ENERGY: 5210000 | 3564.4016   | 5798.8101  | 5969.5128   |           |
| 363.6261               | -15312.5559 | -1849.9486 | 0.0000      | 0.0000    |
| 8626.4561              | 7160.3021   | 321.8081   | -1466.1540  | 7229.8596 |
| 325.3666               | 57.9648     | 20.3661    | 664265.7895 | -0.2418   |
| -0.2669                |             |            |             |           |
| [18506]ENERGY: 5220000 | 3565.0792   | 5744.9135  | 5925.2257   |           |
| 363.8309               | -15303.8438 | -1844.9814 | 0.0000      | 0.0000    |
| 8711.8065              | 7162.0306   | 324.9921   | -1549.7760  | 7230.9116 |
| 325.3179               | 140.9766    | 67.0671    | 664265.7895 | -5.0694   |
| -5.0576                |             |            |             |           |
| [18556]ENERGY: 5230000 | 3593.7026   | 5766.0438  | 5885.8360   |           |
| 353.5870               | -15398.3196 | -1819.7942 | 0.0000      | 0.0000    |
| 8778.4395              | 7159.4952   | 327.4778   | -1618.9443  | 7229.5659 |
| 325.4209               | 186.6137    | 110.9558   | 664265.7895 | -0.7288   |
| -0.7442                |             |            |             |           |
| [18592]ENERGY: 5240000 | 3548.3511   | 5853.6519  | 5841.1902   |           |
| 355.3544               | -15386.0608 | -1829.5659 | 0.0000      | 0.0000    |
| 8774.9981              | 7157.9189   | 327.3494   | -1617.0792  | 7230.3785 |
| 325.5734               | -46.4798    | -80.4217   | 664265.7895 | -1.5932   |
| -1.5585                |             |            |             |           |

## Supplementary Text 6

|                        |             |            |             |           |
|------------------------|-------------|------------|-------------|-----------|
| [18642]ENERGY: 5250000 | 3543.3636   | 5755.5802  | 5930.1702   |           |
| 349.9488               | -15271.9287 | -1918.9418 | 0.0000      | 0.0000    |
| 8771.5756              | 7159.7678   | 327.2217   | -1611.8078  | 7230.0551 |
| 325.7503               | -8.6089     | -54.0454   | 664265.7895 | 3.6351    |
| 3.5912                 |             |            |             |           |
| [18678]ENERGY: 5260000 | 3578.3525   | 5809.4118  | 5917.4311   |           |
| 367.2958               | -15358.3817 | -1867.1512 | 0.0000      | 0.0000    |
| 8709.9880              | 7156.9463   | 324.9242   | -1553.0417  | 7230.9435 |
| 325.7378               | -78.2879    | -82.3975   | 664265.7895 | 0.6778    |
| 0.6955                 |             |            |             |           |
| [18728]ENERGY: 5270000 | 3584.6716   | 5786.7018  | 5896.5068   |           |
| 350.0599               | -15317.7683 | -1885.9255 | 0.0000      | 0.0000    |
| 8746.7645              | 7161.0108   | 326.2962   | -1585.7537  | 7231.0113 |
| 325.4122               | 65.0836     | 18.1452    | 664265.7895 | 6.6464    |
| 6.6576                 |             |            |             |           |
| [18764]ENERGY: 5280000 | 3549.5592   | 5820.4396  | 5930.6979   |           |
| 372.1784               | -15382.3324 | -1855.9671 | 0.0000      | 0.0000    |
| 8723.5791              | 7158.1548   | 325.4312   | -1565.4243  | 7230.1003 |
| 325.3173               | -63.8007    | -58.8425   | 664265.7895 | -3.1627   |
| -3.1630                |             |            |             |           |
| [18814]ENERGY: 5290000 | 3548.1087   | 5864.2572  | 5860.6154   |           |
| 379.2601               | -15291.0345 | -1844.2362 | 0.0000      | 0.0000    |
| 8644.2631              | 7161.2338   | 322.4724   | -1483.0293  | 7230.6531 |
| 325.4817               | 15.1126     | 31.6516    | 664265.7895 | -2.0611   |
| -2.0597                |             |            |             |           |
| [18853]ENERGY: 5300000 | 3592.8248   | 5826.4367  | 5857.1887   |           |
| 333.3376               | -15308.9132 | -1821.0784 | 0.0000      | 0.0000    |
| 8681.7625              | 7161.5587   | 323.8713   | -1520.2038  | 7230.6694 |
| 325.4642               | 199.5536    | 59.3776    | 664265.7895 | 1.4855    |
| 1.4783                 |             |            |             |           |
| [18903]ENERGY: 5310000 | 3600.1231   | 5771.5445  | 5935.4506   |           |
| 341.1670               | -15323.8948 | -1812.7288 | 0.0000      | 0.0000    |
| 8647.9938              | 7159.6553   | 322.6115   | -1488.3385  | 7230.9983 |
| 325.5675               | -160.3856   | -86.7192   | 664265.7895 | -7.2191   |
| -7.2074                |             |            |             |           |
| [18939]ENERGY: 5320000 | 3525.9312   | 5829.6678  | 5907.8908   |           |
| 362.8510               | -15280.7383 | -1872.3958 | 0.0000      | 0.0000    |
| 8687.6641              | 7160.8709   | 324.0914   | -1526.7932  | 7231.0491 |
| 325.7592               | 133.2190    | 3.4060     | 664265.7895 | -3.9513   |
| -3.9807                |             |            |             |           |
| [18989]ENERGY: 5330000 | 3567.0904   | 5801.1694  | 5920.1368   |           |
| 343.0455               | -15311.3343 | -1875.1775 | 0.0000      | 0.0000    |
| 8714.1864              | 7159.1168   | 325.0808   | -1555.0696  | 7231.0006 |
| 325.8038               | -170.0510   | -213.6307  | 664265.7895 | 0.5378    |
| 0.5786                 |             |            |             |           |
| [19025]ENERGY: 5340000 | 3562.3154   | 5815.0796  | 5903.3968   |           |
| 382.8837               | -15336.9123 | -1867.4881 | 0.0000      | 0.0000    |
| 8701.3897              | 7160.6649   | 324.6035   | -1540.7249  | 7231.4352 |
| 325.9743               | -64.8569    | -178.7269  | 664265.7895 | 0.1409    |
| 0.1201                 |             |            |             |           |
| [19075]ENERGY: 5350000 | 3647.3305   | 5837.1101  | 5888.0285   |           |
| 357.5299               | -15416.1758 | -1828.0168 | 0.0000      | 0.0000    |
| 8677.2424              | 7163.0489   | 323.7027   | -1514.1935  | 7230.4329 |
| 325.6170               | -135.6536   | -107.0156  | 664265.7895 | -2.2823   |

Supplementary Text 6

-2.2863  
 [19111]ENERGY: 5360000      3551.2117      5887.4160      5906.1668  
 364.5655      -15411.6650      -1892.9262      0.0000      0.0000  
 8755.7712      7160.5401      326.6322      -1595.2311      7232.1167  
 325.6687      96.1681      123.9339      664265.7895      -3.0543  
 -3.0459  
 [19161]ENERGY: 5370000      3506.6054      5893.6776      5888.3116  
 382.8131      -15370.8392      -1818.9223      0.0000      0.0000  
 8679.8382      7161.4844      323.7995      -1518.3537      7232.0702  
 325.8609      118.9113      71.4452      664265.7895      -6.3241  
 -6.3411  
 [19197]ENERGY: 5380000      3617.2614      5738.2055      5955.5970  
 377.4131      -15381.3453      -1842.4488      0.0000      0.0000  
 8693.6075      7158.2905      324.3132      -1535.3170      7232.3540  
 325.7797      -103.1985      -54.3226      664265.7895      -12.1703  
 -12.1424  
 [19247]ENERGY: 5390000      3610.3324      5771.0234      5898.3320  
 360.3654      -15414.6086      -1848.6427      0.0000      0.0000  
 8786.2946      7163.0966      327.7708      -1623.1980      7234.1830  
 325.8075      -8.9748      -82.7350      664265.7895      -14.8391  
 -14.8685  
 [19286]ENERGY: 5400000      3580.7751      5863.8546      5847.6758  
 359.3932      -15457.9541      -1778.5738      0.0000      0.0000  
 8748.2886      7163.4594      326.3530      -1584.8292      7234.4524  
 325.6304      107.6282      9.4184      664265.7895      -14.9015  
 -14.8922  
 [19336]ENERGY: 5410000      3577.8226      5770.0119      5884.6469  
 358.4886      -15378.7812      -1839.0732      0.0000      0.0000  
 8790.0460      7163.1616      327.9108      -1626.8844      7232.4616  
 325.6864      -89.9854      -37.8462      664265.7895      -12.1484  
 -12.1427  
 [19372]ENERGY: 5420000      3672.8739      5731.9352      5888.3442  
 359.0961      -15353.7339      -1904.8946      0.0000      0.0000  
 8772.6400      7166.2609      327.2614      -1606.3791      7235.9016  
 325.9934      -190.0364      -196.4016      664265.7895      -12.7006  
 -12.7017  
 [19422]ENERGY: 5430000      3588.7123      5778.9367      5919.0472  
 354.1246      -15350.8593      -1820.8105      0.0000      0.0000  
 8698.2869      7167.4379      324.4877      -1530.8490      7234.2681  
 325.9703      64.7898      -20.0479      664265.7895      -10.5489  
 -10.5669  
 [19458]ENERGY: 5440000      3554.7079      5825.6917      5890.4085  
 365.2444      -15344.5146      -1858.0553      0.0000      0.0000  
 8733.0480      7166.5305      325.7845      -1566.5175      7235.0083  
 326.1491      175.6201      126.6755      664265.7895      -12.5522  
 -12.5384  
 [19508]ENERGY: 5450000      3655.7394      5691.5108      5895.7272  
 373.3275      -15465.7763      -1786.3056      0.0000      0.0000  
 8800.0805      7164.3036      328.2851      -1635.7769      7233.7237  
 326.0305      -50.8123      -115.4322      664265.7895      -9.8011  
 -9.7939  
 [19544]ENERGY: 5460000      3575.2781      5816.7572      5927.6434  
 355.2632      -15351.8392      -1872.9793      0.0000      0.0000  
 8715.1120      7165.2354      325.1154      -1549.8765      7235.3063

Supplementary Text 6

|                        |             |            |             |           |
|------------------------|-------------|------------|-------------|-----------|
| 326.1792               | -147.3131   | -82.7474   | 664265.7895 | -12.7921  |
| -12.7959               |             |            |             |           |
| [19594]ENERGY: 5470000 | 3518.2503   | 5831.0100  | 5885.4221   |           |
| 356.0420               | -15304.3493 | -1877.0714 | 0.0000      | 0.0000    |
| 8754.5500              | 7163.8537   | 326.5866   | -1590.6963  | 7235.8754 |
| 326.0341               | 113.7524    | 46.6619    | 664265.7895 | -14.8379  |
| -14.8489               |             |            |             |           |
| [19630]ENERGY: 5480000 | 3585.7184   | 5890.3649  | 5946.2701   |           |
| 393.4021               | -15434.8199 | -1870.7973 | 0.0000      | 0.0000    |
| 8656.8653              | 7167.0035   | 322.9425   | -1489.8617  | 7236.3010 |
| 326.1461               | 96.3135     | 24.1003    | 664265.7895 | -15.3946  |
| -15.3999               |             |            |             |           |
| [19680]ENERGY: 5490000 | 3617.3232   | 5822.9209  | 5933.0312   |           |
| 339.7321               | -15354.0568 | -1898.1446 | 0.0000      | 0.0000    |
| 8705.8621              | 7166.6681   | 324.7703   | -1539.1940  | 7235.1693 |
| 326.3633               | -148.7788   | -87.1065   | 664265.7895 | -18.3158  |
| -18.3101               |             |            |             |           |
| [19719]ENERGY: 5500000 | 3592.7573   | 5772.2975  | 5889.2019   |           |
| 367.0539               | -15345.1786 | -1935.2043 | 0.0000      | 0.0000    |
| 8821.3935              | 7162.3212   | 329.0802   | -1659.0723  | 7236.6279 |
| 326.4640               | -2.8029     | -10.5912   | 664265.7895 | -13.2200  |
| -13.2213               |             |            |             |           |
| [19769]ENERGY: 5510000 | 3624.6953   | 5780.0768  | 5876.0604   |           |
| 365.8983               | -15312.8458 | -1873.8478 | 0.0000      | 0.0000    |
| 8708.1386              | 7168.1759   | 324.8552   | -1539.9627  | 7236.4940 |
| 326.2453               | -36.0338    | -58.9736   | 664265.7895 | -16.1793  |
| -16.1572               |             |            |             |           |
| [19805]ENERGY: 5520000 | 3619.3654   | 5833.2368  | 5953.2688   |           |
| 349.9371               | -15476.6894 | -1845.2649 | 0.0000      | 0.0000    |
| 8729.0570              | 7162.9108   | 325.6356   | -1566.1463  | 7236.7865 |
| 326.3008               | -24.6586    | 7.5915     | 664265.7895 | -13.4272  |
| -13.4444               |             |            |             |           |
| [19855]ENERGY: 5530000 | 3510.1681   | 5855.1048  | 5912.7009   |           |
| 350.6427               | -15345.8741 | -1862.7559 | 0.0000      | 0.0000    |
| 8744.8808              | 7164.8673   | 326.2259   | -1580.0135  | 7237.6008 |
| 326.3220               | -124.6873   | -33.6117   | 664265.7895 | -14.1909  |
| -14.1873               |             |            |             |           |
| [19891]ENERGY: 5540000 | 3559.5490   | 5795.0302  | 5873.4219   |           |
| 378.6508               | -15407.9002 | -1831.4739 | 0.0000      | 0.0000    |
| 8798.7628              | 7166.0407   | 328.2360   | -1632.7221  | 7235.8741 |
| 326.0740               | 47.8385     | 14.7924    | 664265.7895 | -16.3974  |
| -16.4062               |             |            |             |           |
| [19941]ENERGY: 5550000 | 3639.2222   | 5845.1649  | 5936.3230   |           |
| 327.7259               | -15384.2659 | -1887.6469 | 0.0000      | 0.0000    |
| 8691.6486              | 7168.1719   | 324.2401   | -1523.4767  | 7236.5605 |
| 326.3720               | 107.0237    | 49.4331    | 664265.7895 | -16.6042  |
| -16.6060               |             |            |             |           |
| [19977]ENERGY: 5560000 | 3552.4341   | 5836.0479  | 5864.3426   |           |
| 344.0768               | -15390.6032 | -1830.3256 | 0.0000      | 0.0000    |
| 8790.9641              | 7166.9366   | 327.9450   | -1624.0275  | 7235.6967 |
| 326.2725               | 29.6520     | 19.2507    | 664265.7895 | -16.9560  |
| -16.9304               |             |            |             |           |
| [20027]ENERGY: 5570000 | 3488.3171   | 5901.5877  | 5850.6429   |           |
| 363.6602               | -15346.6149 | -1803.8638 | 0.0000      | 0.0000    |

## Supplementary Text 6

|                        |             |            |             |           |
|------------------------|-------------|------------|-------------|-----------|
| 8714.6864              | 7168.4155   | 325.0995   | -1546.2709  | 7234.9642 |
| 326.1844               | 71.8592     | 87.5502    | 664265.7895 | -11.2870  |
| -11.2854               |             |            |             |           |
| [20063]ENERGY: 5580000 | 3624.2787   | 5852.5413  | 5903.7161   |           |
| 345.2156               | -15263.2834 | -1934.1752 | 0.0000      | 0.0000    |
| 8636.3295              | 7164.6225   | 322.1764   | -1471.7070  | 7236.1111 |
| 326.0647               | -73.1694    | -116.3984  | 664265.7895 | -14.8329  |
| -14.8568               |             |            |             |           |
| [20113]ENERGY: 5590000 | 3622.2294   | 5899.8835  | 5865.3558   |           |
| 375.6746               | -15341.6469 | -1936.6973 | 0.0000      | 0.0000    |
| 8681.9260              | 7166.7251   | 323.8774   | -1515.2009  | 7237.4243 |
| 326.4236               | 64.5622     | -26.7582   | 664265.7895 | -13.3332  |
| -13.3206               |             |            |             |           |
| [20152]ENERGY: 5600000 | 3593.4884   | 5823.8023  | 5936.8764   |           |
| 362.0400               | -15422.4275 | -1914.8046 | 0.0000      | 0.0000    |
| 8784.5513              | 7163.5264   | 327.7058   | -1621.0249  | 7236.3361 |
| 326.5321               | 64.8513     | -41.6088   | 664265.7895 | -17.6176  |
| -17.6097               |             |            |             |           |
| [20202]ENERGY: 5610000 | 3622.5105   | 5831.3519  | 5898.6630   |           |
| 361.7395               | -15360.4963 | -1837.2645 | 0.0000      | 0.0000    |
| 8651.5858              | 7168.0899   | 322.7455   | -1483.4959  | 7236.7423 |
| 326.3862               | 38.8348     | 0.1719     | 664265.7895 | -18.5290  |
| -18.5340               |             |            |             |           |
| [20238]ENERGY: 5620000 | 3544.8837   | 5899.5678  | 5853.7546   |           |
| 381.0810               | -15407.1293 | -1828.6734 | 0.0000      | 0.0000    |
| 8722.6536              | 7166.1380   | 325.3967   | -1556.5157  | 7236.3265 |
| 326.5129               | -7.5868     | -44.5211   | 664265.7895 | -15.6293  |
| -15.6532               |             |            |             |           |
| [20288]ENERGY: 5630000 | 3568.0720   | 5861.2211  | 5897.7159   |           |
| 336.1713               | -15367.7880 | -1861.7139 | 0.0000      | 0.0000    |
| 8734.4280              | 7168.1063   | 325.8360   | -1566.3216  | 7236.1859 |
| 326.2811               | 14.9066     | 4.9769     | 664265.7895 | -17.4415  |
| -17.4192               |             |            |             |           |
| [20324]ENERGY: 5640000 | 3568.3515   | 5757.2225  | 5873.8651   |           |
| 357.3943               | -15357.2886 | -1887.8896 | 0.0000      | 0.0000    |
| 8853.5715              | 7165.2266   | 330.2806   | -1688.3449  | 7237.5178 |
| 326.2662               | 27.0418     | -15.3284   | 664265.7895 | -14.5057  |
| -14.5144               |             |            |             |           |
| [20374]ENERGY: 5650000 | 3607.7241   | 5819.1544  | 5919.4929   |           |
| 365.5878               | -15317.2199 | -1893.5722 | 0.0000      | 0.0000    |
| 8666.6303              | 7167.7973   | 323.3068   | -1498.8330  | 7236.4376 |
| 326.1185               | 12.5751     | -6.4243    | 664265.7895 | -20.3025  |
| -20.2968               |             |            |             |           |
| [20410]ENERGY: 5660000 | 3660.6503   | 5706.3888  | 5898.6331   |           |
| 345.5212               | -15253.6672 | -1896.3219 | 0.0000      | 0.0000    |
| 8703.8472              | 7165.0514   | 324.6951   | -1538.7958  | 7236.3438 |
| 326.1709               | -29.8070    | -76.2136   | 664265.7895 | -16.9866  |
| -16.9974               |             |            |             |           |
| [20460]ENERGY: 5670000 | 3628.5666   | 5775.8887  | 5855.3765   |           |
| 366.2056               | -15326.0765 | -1860.6894 | 0.0000      | 0.0000    |
| 8727.4519              | 7166.7234   | 325.5757   | -1560.7284  | 7238.2022 |
| 326.3537               | 50.9756     | 43.8091    | 664265.7895 | -19.6577  |
| -19.6574               |             |            |             |           |
| [20496]ENERGY: 5680000 | 3585.0765   | 5741.1299  | 5905.2128   |           |

## Supplementary Text 6

|                        |             |            |             |           |
|------------------------|-------------|------------|-------------|-----------|
| 354.8109               | -15334.8326 | -1861.7315 | 0.0000      | 0.0000    |
| 8775.8513              | 7165.5172   | 327.3812   | -1610.3341  | 7237.0740 |
| 326.4603               | -51.6437    | 9.8431     | 664265.7895 | -17.5200  |
| -17.5141               |             |            |             |           |
| [20546]ENERGY: 5690000 | 3649.5248   | 5856.3524  | 5887.3526   |           |
| 354.7135               | -15397.3126 | -1853.5438 | 0.0000      | 0.0000    |
| 8671.0805              | 7168.1674   | 323.4728   | -1502.9131  | 7237.0273 |
| 326.5646               | -75.8457    | -109.2546  | 664265.7895 | -14.6282  |
| -14.6264               |             |            |             |           |
| [20585]ENERGY: 5700000 | 3536.0360   | 5846.0767  | 5899.1413   |           |
| 370.1300               | -15362.3829 | -1828.4590 | 0.0000      | 0.0000    |
| 8707.5105              | 7168.0525   | 324.8318   | -1539.4579  | 7236.3303 |
| 326.2996               | -24.3890    | -85.1813   | 664265.7895 | -15.8288  |
| -15.8463               |             |            |             |           |
| [20635]ENERGY: 5710000 | 3668.6200   | 5790.1505  | 5896.0965   |           |
| 360.8688               | -15407.3130 | -1861.2914 | 0.0000      | 0.0000    |
| 8715.6603              | 7162.7916   | 325.1358   | -1552.8687  | 7235.4438 |
| 326.3087               | -237.2530   | -90.6011   | 664265.7895 | -20.7227  |
| -20.7043               |             |            |             |           |
| [20671]ENERGY: 5720000 | 3664.5580   | 5864.0347  | 5867.1113   |           |
| 372.2939               | -15395.8047 | -1871.1077 | 0.0000      | 0.0000    |
| 8668.7292              | 7169.8146   | 323.3851   | -1498.9146  | 7236.7721 |
| 326.5114               | -103.0071   | -85.1723   | 664265.7895 | -11.5468  |
| -11.5443               |             |            |             |           |
| [20721]ENERGY: 5730000 | 3589.4507   | 5864.8905  | 5898.7601   |           |
| 351.1804               | -15441.6070 | -1840.5053 | 0.0000      | 0.0000    |
| 8742.2680              | 7164.4375   | 326.1284   | -1577.8306  | 7236.1320 |
| 326.3288               | 114.4749    | 109.0459   | 664265.7895 | -9.5963   |
| -9.6003                |             |            |             |           |
| [20757]ENERGY: 5740000 | 3572.4753   | 5740.7765  | 5914.7888   |           |
| 359.9416               | -15277.0310 | -1890.3571 | 0.0000      | 0.0000    |
| 8749.2835              | 7169.8775   | 326.3901   | -1579.4060  | 7238.6527 |
| 326.1091               | -108.5115   | -111.7754  | 664265.7895 | -10.7451  |
| -10.7505               |             |            |             |           |
| [20807]ENERGY: 5750000 | 3623.7955   | 5881.7529  | 5859.8198   |           |
| 339.6629               | -15316.7845 | -1913.1700 | 0.0000      | 0.0000    |
| 8691.8785              | 7166.9552   | 324.2487   | -1524.9233  | 7238.1912 |
| 326.1713               | -129.8622   | -35.1523   | 664265.7895 | -13.0172  |
| -12.9966               |             |            |             |           |
| [20843]ENERGY: 5760000 | 3603.4385   | 5834.4838  | 5899.0148   |           |
| 347.9558               | -15325.7447 | -1850.5381 | 0.0000      | 0.0000    |
| 8661.1902              | 7169.8003   | 323.1038   | -1491.3899  | 7238.6522 |
| 326.1150               | 11.9391     | -18.8326   | 664265.7895 | -11.2538  |
| -11.2834               |             |            |             |           |
| [20893]ENERGY: 5770000 | 3543.9961   | 5934.0074  | 5893.2660   |           |
| 362.6309               | -15338.7061 | -1879.6084 | 0.0000      | 0.0000    |
| 8655.0111              | 7170.5970   | 322.8733   | -1484.4141  | 7238.1598 |
| 326.4459               | 183.6111    | 219.9544   | 664265.7895 | -13.4581  |
| -13.4567               |             |            |             |           |
| [20929]ENERGY: 5780000 | 3635.1148   | 5823.2994  | 5877.4381   |           |
| 374.4834               | -15340.5719 | -1950.5288 | 0.0000      | 0.0000    |
| 8751.1065              | 7170.3416   | 326.4581   | -1580.7649  | 7240.0211 |
| 326.2946               | -48.2132    | -137.3763  | 664265.7895 | -15.7719  |
| -15.7585               |             |            |             |           |

## Supplementary Text 6

|                        |             |            |             |           |
|------------------------|-------------|------------|-------------|-----------|
| [20979]ENERGY: 5790000 | 3623.2008   | 5786.1473  | 5848.6192   |           |
| 345.3551               | -15351.2619 | -1827.8139 | 0.0000      | 0.0000    |
| 8746.4635              | 7170.7100   | 326.2849   | -1575.7535  | 7238.8801 |
| 326.5269               | -44.2260    | -5.7679    | 664265.7895 | -7.0967   |
| -7.0921                |             |            |             |           |
| [21018]ENERGY: 5800000 | 3574.4895   | 5890.1538  | 5899.7674   |           |
| 354.1422               | -15455.6217 | -1824.2795 | 0.0000      | 0.0000    |
| 8731.5038              | 7170.1555   | 325.7269   | -1561.3483  | 7239.7208 |
| 326.4495               | -55.8027    | -41.1664   | 664265.7895 | -12.2876  |
| -12.2985               |             |            |             |           |
| [21068]ENERGY: 5810000 | 3547.9120   | 5831.0263  | 5898.0179   |           |
| 360.1454               | -15344.1697 | -1844.0491 | 0.0000      | 0.0000    |
| 8723.5257              | 7172.4084   | 325.4292   | -1551.1173  | 7239.6371 |
| 326.4726               | 77.3525     | -0.5090    | 664265.7895 | -6.5870   |
| -6.5841                |             |            |             |           |
| [21104]ENERGY: 5820000 | 3596.9742   | 5932.7324  | 5917.7185   |           |
| 348.0485               | -15447.4635 | -1913.9965 | 0.0000      | 0.0000    |
| 8735.5990              | 7169.6127   | 325.8796   | -1565.9864  | 7238.9329 |
| 326.3950               | -91.0028    | -104.6949  | 664265.7895 | -11.2976  |
| -11.3063               |             |            |             |           |
| [21154]ENERGY: 5830000 | 3543.1216   | 5855.8911  | 5919.0215   |           |
| 373.8936               | -15375.5600 | -1883.9558 | 0.0000      | 0.0000    |
| 8737.2597              | 7169.6716   | 325.9416   | -1567.5882  | 7239.8741 |
| 326.4396               | 124.4476    | 53.4443    | 664265.7895 | -9.0347   |
| -9.0365                |             |            |             |           |
| [21190]ENERGY: 5840000 | 3533.3585   | 5908.9966  | 5898.3885   |           |
| 361.0825               | -15404.0574 | -1916.6035 | 0.0000      | 0.0000    |
| 8783.6680              | 7164.8331   | 327.6728   | -1618.8349  | 7238.3056 |
| 326.1401               | 34.5688     | 53.8548    | 664265.7895 | -10.6529  |
| -10.6346               |             |            |             |           |
| [21240]ENERGY: 5850000 | 3566.4641   | 5897.1869  | 5911.5619   |           |
| 353.7816               | -15369.5973 | -1893.7695 | 0.0000      | 0.0000    |
| 8704.6893              | 7170.3171   | 324.7266   | -1534.3722  | 7240.4271 |
| 326.3480               | 209.7094    | 106.7783   | 664265.7895 | -14.3938  |
| -14.4046               |             |            |             |           |
| [21276]ENERGY: 5860000 | 3601.0734   | 5896.1331  | 5878.8792   |           |
| 351.8230               | -15413.7741 | -1812.3363 | 0.0000      | 0.0000    |
| 8668.6554              | 7170.4536   | 323.3823   | -1498.2018  | 7238.8906 |
| 326.2054               | 8.9587      | 31.2591    | 664265.7895 | -10.4846  |
| -10.5049               |             |            |             |           |
| [21326]ENERGY: 5870000 | 3708.2391   | 5878.8313  | 5885.1093   |           |
| 350.2601               | -15440.4417 | -1902.6588 | 0.0000      | 0.0000    |
| 8690.5223              | 7169.8615   | 324.1981   | -1520.6608  | 7239.9781 |
| 326.2962               | -83.3184    | -151.2258  | 664265.7895 | -11.0400  |
| -11.0162               |             |            |             |           |
| [21362]ENERGY: 5880000 | 3542.5040   | 5770.3417  | 5910.3036   |           |
| 369.8785               | -15330.5660 | -1822.4857 | 0.0000      | 0.0000    |
| 8730.4158              | 7170.3919   | 325.6863   | -1560.0239  | 7240.7738 |
| 326.1251               | 175.3260    | 142.3370   | 664265.7895 | -12.7719  |
| -12.7819               |             |            |             |           |
| [21412]ENERGY: 5890000 | 3576.6019   | 5821.2847  | 5935.8141   |           |
| 362.1046               | -15435.5908 | -1862.1516 | 0.0000      | 0.0000    |
| 8774.6036              | 7172.6665   | 327.3347   | -1601.9371  | 7240.2089 |
| 326.2489               | 22.0348     | 22.1143    | 664265.7895 | -10.4457  |



## Supplementary Text 6

-10.4355  
[21451]ENERGY: 5900000 3541.5831 5853.9531 5874.1668  
346.6521 -15323.4648 -1901.2834 0.0000 0.0000  
8777.8615 7169.4684 327.4562 -1608.3932 7240.4572  
326.1569 45.6491 41.3628 664265.7895 -14.3923  
-14.3822  
[21501]ENERGY: 5910000 3551.9715 5768.6238 5966.3560  
355.7759 -15366.0288 -1928.1288 0.0000 0.0000  
8819.8666 7168.4362 329.0232 -1651.4303 7239.6585  
326.1812 -65.8963 3.5432 664265.7895 -10.6738  
-10.6702  
[21537]ENERGY: 5920000 3610.0686 5832.4958 5935.1482  
358.4227 -15459.6895 -1859.2931 0.0000 0.0000  
8755.7833 7172.9362 326.6326 -1582.8471 7241.3895  
326.2055 58.3211 -105.6066 664265.7895 -15.1961  
-15.2172  
[21587]ENERGY: 5930000 3626.6797 5861.9205 5938.8084  
343.8723 -15469.5659 -1883.9402 0.0000 0.0000  
8751.7223 7169.4972 326.4811 -1582.2251 7241.1052  
326.3519 35.0930 -36.9111 664265.7895 -14.6753  
-14.6672  
[21623]ENERGY: 5940000 3542.1456 5760.5924 5930.4742  
359.7742 -15369.7919 -1866.6949 0.0000 0.0000  
8814.5513 7171.0509 328.8249 -1643.5003 7241.6058  
326.2071 52.0373 -100.9469 664265.7895 -14.1949  
-14.2067  
[21673]ENERGY: 5950000 3665.6348 5842.6217 5994.4031  
375.5518 -15426.6386 -1930.5746 0.0000 0.0000  
8654.4842 7175.4825 322.8537 -1479.0017 7241.3612  
326.0799 -103.5676 -122.7361 664265.7895 -14.9410  
-14.9336  
[21709]ENERGY: 5960000 3640.6838 5894.8447 5896.7473  
371.8779 -15440.9905 -1906.8963 0.0000 0.0000  
8716.0450 7172.3117 325.1502 -1543.7332 7240.1735  
326.0953 -53.7475 -39.6346 664265.7895 -13.3298  
-13.3269  
[21759]ENERGY: 5970000 3611.0142 5796.2842 5855.9794  
362.0622 -15361.9297 -1871.7388 0.0000 0.0000  
8781.1423 7172.8138 327.5786 -1608.3285 7241.2555  
326.4665 -188.1163 -223.3853 664265.7895 -13.9296  
-13.9289  
[21795]ENERGY: 5980000 3612.6498 5733.1341 5930.0674  
354.7023 -15365.5497 -1841.5265 0.0000 0.0000  
8742.7998 7166.2773 326.1483 -1576.5225 7240.5008  
326.6319 169.1684 61.6283 664265.7895 -14.3627  
-14.3480  
[21845]ENERGY: 5990000 3552.8702 5902.6131 5921.6453  
356.7242 -15418.5296 -1867.8597 0.0000 0.0000  
8721.6446 7169.1081 325.3591 -1552.5366 7240.3212  
326.4472 99.7438 64.1511 664265.7895 -13.7533  
-13.7721  
[21884]ENERGY: 6000000 3520.5340 5874.9767 5960.5393  
331.5135 -15378.5630 -1892.6602 0.0000 0.0000  
8756.4666 7172.8069 326.6581 -1583.6597 7240.9359

## Supplementary Text 6

|                        |             |            |             |           |
|------------------------|-------------|------------|-------------|-----------|
| 326.4237               | -127.6414   | -104.8939  | 664265.7895 | -9.2332   |
| -9.2356                |             |            |             |           |
| [21934]ENERGY: 6010000 | 3654.6907   | 5901.0032  | 5867.9965   |           |
| 364.2313               | -15391.9086 | -1909.1439 | 0.0000      | 0.0000    |
| 8684.0759              | 7170.9451   | 323.9576   | -1513.1308  | 7242.1113 |
| 326.4967               | -196.4010   | -214.6720  | 664265.7895 | -9.3547   |
| -9.3485                |             |            |             |           |
| [21970]ENERGY: 6020000 | 3612.2060   | 5773.4832  | 5873.4905   |           |
| 350.5095               | -15391.2155 | -1872.7061 | 0.0000      | 0.0000    |
| 8824.5550              | 7170.3226   | 329.1981   | -1654.2323  | 7241.2448 |
| 326.4265               | 6.5086      | -40.2516   | 664265.7895 | -11.8721  |
| -11.8680               |             |            |             |           |
| [22020]ENERGY: 6030000 | 3575.8111   | 5834.8565  | 5949.2084   |           |
| 361.9587               | -15386.8213 | -1872.1021 | 0.0000      | 0.0000    |
| 8709.3996              | 7172.3108   | 324.9023   | -1537.0888  | 7240.7170 |
| 326.6285               | 14.3134     | 29.5183    | 664265.7895 | -13.2082  |
| -13.1870               |             |            |             |           |
| [22056]ENERGY: 6040000 | 3646.5965   | 5806.1815  | 5918.2030   |           |
| 365.9285               | -15376.7906 | -1906.8325 | 0.0000      | 0.0000    |
| 8719.4472              | 7172.7336   | 325.2771   | -1546.7136  | 7242.6152 |
| 326.6459               | -200.9105   | -153.4000  | 664265.7895 | -12.0148  |
| -12.0357               |             |            |             |           |
| [22106]ENERGY: 6050000 | 3539.0283   | 5752.3042  | 5946.9201   |           |
| 360.4810               | -15380.8083 | -1824.3583 | 0.0000      | 0.0000    |
| 8778.2343              | 7171.8011   | 327.4701   | -1606.4331  | 7242.1431 |
| 326.5609               | -28.3720    | -9.5149    | 664265.7895 | -13.2248  |
| -13.2223               |             |            |             |           |
| [22142]ENERGY: 6060000 | 3513.2175   | 5857.9508  | 5868.1972   |           |
| 327.4122               | -15262.8975 | -1893.9154 | 0.0000      | 0.0000    |
| 8758.6992              | 7168.6641   | 326.7414   | -1590.0351  | 7243.4010 |
| 326.4650               | 27.8414     | 44.1520    | 664265.7895 | -14.0586  |
| -14.0701               |             |            |             |           |
| [22192]ENERGY: 6070000 | 3653.4447   | 5823.3549  | 5876.8342   |           |
| 367.9315               | -15319.6638 | -1884.8878 | 0.0000      | 0.0000    |
| 8664.6819              | 7181.6956   | 323.2341   | -1482.9863  | 7245.3127 |
| 326.4655               | -121.9374   | -137.2991  | 664265.7895 | -16.8491  |
| -16.8541               |             |            |             |           |
| [22228]ENERGY: 6080000 | 3592.1408   | 5833.6532  | 5931.5741   |           |
| 364.7211               | -15374.9041 | -1865.3100 | 0.0000      | 0.0000    |
| 8693.9443              | 7175.8194   | 324.3257   | -1518.1250  | 7245.6182 |
| 326.5088               | -110.3125   | -112.5043  | 664265.7895 | -19.4266  |
| -19.4035               |             |            |             |           |
| [22278]ENERGY: 6090000 | 3590.6674   | 5824.2300  | 5871.6294   |           |
| 360.5730               | -15445.7798 | -1846.0965 | 0.0000      | 0.0000    |
| 8816.1555              | 7171.3790   | 328.8848   | -1644.7765  | 7245.0815 |
| 326.6061               | 28.6843     | -17.3728   | 664265.7895 | -17.1732  |
| -17.1641               |             |            |             |           |
| [22317]ENERGY: 6100000 | 3610.5157   | 5834.4363  | 5931.6965   |           |
| 367.9487               | -15334.4296 | -1876.3418 | 0.0000      | 0.0000    |
| 8643.7743              | 7177.6000   | 322.4541   | -1466.1743  | 7246.5325 |
| 326.3226               | -5.4495     | -96.5363   | 664265.7895 | -17.3603  |
| -17.3852               |             |            |             |           |
| [22367]ENERGY: 6110000 | 3660.7331   | 5803.2640  | 5968.3130   |           |
| 344.5008               | -15430.4638 | -1880.5240 | 0.0000      | 0.0000    |

## Supplementary Text 6

|                        |             |            |             |           |
|------------------------|-------------|------------|-------------|-----------|
| 8708.7394              | 7174.5626   | 324.8776   | -1534.1768  | 7245.1074 |
| 326.5380               | -129.8404   | -70.0938   | 664265.7895 | -19.5294  |
| -19.5049               |             |            |             |           |
| [22403]ENERGY: 6120000 | 3623.2793   | 5892.4139  | 5841.9718   |           |
| 373.7003               | -15463.5453 | -1791.6704 | 0.0000      | 0.0000    |
| 8696.0337              | 7172.1833   | 324.4037   | -1523.8504  | 7246.4514 |
| 326.2819               | 97.9126     | 97.6003    | 664265.7895 | -18.0945  |
| -18.1045               |             |            |             |           |
| [22453]ENERGY: 6130000 | 3569.9765   | 5912.5154  | 5919.6829   |           |
| 365.0673               | -15358.8491 | -1975.2512 | 0.0000      | 0.0000    |
| 8743.6574              | 7176.7992   | 326.1803   | -1566.8582  | 7247.1932 |
| 326.4163               | -136.0285   | -110.4236  | 664265.7895 | -16.4293  |
| -16.4474               |             |            |             |           |
| [22489]ENERGY: 6140000 | 3588.7049   | 5811.3976  | 5832.0788   |           |
| 377.0392               | -15365.8282 | -1813.2754 | 0.0000      | 0.0000    |
| 8747.8834              | 7178.0004   | 326.3379   | -1569.8831  | 7246.6999 |
| 326.5755               | 224.5651    | 87.7273    | 664265.7895 | -14.6941  |
| -14.6829               |             |            |             |           |
| [22539]ENERGY: 6150000 | 3562.4170   | 5805.0104  | 5871.3869   |           |
| 369.1799               | -15386.8497 | -1825.6784 | 0.0000      | 0.0000    |
| 8780.6748              | 7176.1410   | 327.5612   | -1604.5339  | 7246.5921 |
| 326.5925               | -90.9171    | 5.4664     | 664265.7895 | -15.8965  |
| -15.8952               |             |            |             |           |
| [22575]ENERGY: 6160000 | 3655.6360   | 5877.6687  | 5880.0387   |           |
| 349.9773               | -15376.7601 | -1867.5991 | 0.0000      | 0.0000    |
| 8661.1681              | 7180.1296   | 323.1030   | -1481.0385  | 7248.5445 |
| 326.5581               | 42.4489     | -17.6680   | 664265.7895 | -15.9993  |
| -16.0208               |             |            |             |           |
| [22625]ENERGY: 6170000 | 3645.1899   | 5838.2528  | 5908.9374   |           |
| 357.6264               | -15444.3939 | -1833.9597 | 0.0000      | 0.0000    |
| 8708.3325              | 7179.9854   | 324.8625   | -1528.3471  | 7248.0916 |
| 326.5866               | -19.3357    | 36.1061    | 664265.7895 | -16.1315  |
| -16.1090               |             |            |             |           |
| [22661]ENERGY: 6180000 | 3625.7070   | 5767.6482  | 5840.6444   |           |
| 390.0178               | -15394.2370 | -1832.8075 | 0.0000      | 0.0000    |
| 8776.7817              | 7173.7546   | 327.4160   | -1603.0272  | 7246.5939 |
| 326.5929               | -46.8250    | -44.4129   | 664265.7895 | -16.8130  |
| -16.8227               |             |            |             |           |
| [22711]ENERGY: 6190000 | 3587.2098   | 5799.5495  | 5889.0564   |           |
| 332.3972               | -15321.4552 | -1876.3614 | 0.0000      | 0.0000    |
| 8764.4308              | 7174.8270   | 326.9552   | -1589.6038  | 7249.0935 |
| 326.7397               | -9.7691     | -0.1450    | 664265.7895 | -18.4058  |
| -18.3984               |             |            |             |           |
| [22750]ENERGY: 6200000 | 3480.8759   | 5782.3159  | 5890.8371   |           |
| 346.2616               | -15365.2535 | -1821.9726 | 0.0000      | 0.0000    |
| 8862.1749              | 7175.2393   | 330.6015   | -1686.9356  | 7248.5912 |
| 326.6197               | 168.6081    | 191.6698   | 664265.7895 | -18.9181  |
| -18.9207               |             |            |             |           |
| [22800]ENERGY: 6210000 | 3627.4267   | 5733.2004  | 5923.7992   |           |
| 361.4087               | -15382.5831 | -1813.8441 | 0.0000      | 0.0000    |
| 8727.9946              | 7177.4024   | 325.5960   | -1550.5921  | 7247.6243 |
| 326.4381               | 2.1869      | -13.9963   | 664265.7895 | -19.4432  |
| -19.4243               |             |            |             |           |
| [22836]ENERGY: 6220000 | 3581.2635   | 5846.0878  | 5860.6966   |           |

## Supplementary Text 6

|                        |             |            |             |           |
|------------------------|-------------|------------|-------------|-----------|
| 357.3991               | -15415.0183 | -1845.8873 | 0.0000      | 0.0000    |
| 8791.0620              | 7175.6035   | 327.9487   | -1615.4585  | 7248.1767 |
| 326.4154               | -45.2329    | -62.5518   | 664265.7895 | -15.7853  |
| -15.7958               |             |            |             |           |
| [22886]ENERGY: 6230000 | 3653.7652   | 5795.6644  | 5932.1086   |           |
| 343.3788               | -15391.4801 | -1841.1647 | 0.0000      | 0.0000    |
| 8687.5116              | 7179.7839   | 324.0857   | -1507.7277  | 7248.8958 |
| 326.5047               | -75.3848    | -99.7991   | 664265.7895 | -19.2489  |
| -19.2411               |             |            |             |           |
| [22922]ENERGY: 6240000 | 3560.3912   | 5821.3892  | 5909.0956   |           |
| 364.8443               | -15449.3655 | -1776.2170 | 0.0000      | 0.0000    |
| 8747.4252              | 7177.5629   | 326.3208   | -1569.8623  | 7249.4685 |
| 326.2827               | 182.4400    | 118.4571   | 664265.7895 | -18.8148  |
| -18.8100               |             |            |             |           |
| [22972]ENERGY: 6250000 | 3511.9176   | 5917.6834  | 5879.8992   |           |
| 358.0034               | -15374.7698 | -1832.5681 | 0.0000      | 0.0000    |
| 8715.4826              | 7175.6482   | 325.1292   | -1539.8344  | 7248.2545 |
| 326.5235               | 161.0653    | 130.7545   | 664265.7895 | -17.6472  |
| -17.6519               |             |            |             |           |
| [23008]ENERGY: 6260000 | 3655.6755   | 5765.3158  | 5917.1705   |           |
| 354.0939               | -15391.4059 | -1915.2948 | 0.0000      | 0.0000    |
| 8791.4013              | 7176.9563   | 327.9613   | -1614.4450  | 7248.4079 |
| 326.7042               | -69.4213    | 28.0214    | 664265.7895 | -17.8173  |
| -17.8202               |             |            |             |           |
| [23058]ENERGY: 6270000 | 3521.2068   | 5894.6989  | 5895.3284   |           |
| 359.5857               | -15453.6047 | -1769.2917 | 0.0000      | 0.0000    |
| 8729.3568              | 7177.2803   | 325.6468   | -1552.0765  | 7248.4339 |
| 326.6740               | 159.1959    | 66.6074    | 664265.7895 | -17.1906  |
| -17.2082               |             |            |             |           |
| [23094]ENERGY: 6280000 | 3624.2409   | 5852.0825  | 5908.1262   |           |
| 352.8762               | -15416.6950 | -1878.5309 | 0.0000      | 0.0000    |
| 8737.0020              | 7179.1020   | 325.9320   | -1557.9000  | 7248.4312 |
| 326.7366               | 108.9928    | -33.5377   | 664265.7895 | -11.6247  |
| -11.6147               |             |            |             |           |
| [23144]ENERGY: 6290000 | 3570.9336   | 5829.7671  | 5908.0879   |           |
| 353.4882               | -15363.2810 | -1914.9334 | 0.0000      | 0.0000    |
| 8794.1304              | 7178.1929   | 328.0631   | -1615.9375  | 7248.4720 |
| 326.6895               | 33.7154     | 25.3657    | 664265.7895 | -18.8871  |
| -18.8875               |             |            |             |           |
| [23183]ENERGY: 6300000 | 3595.6506   | 5908.4864  | 5905.4288   |           |
| 353.9985               | -15412.4603 | -1856.4002 | 0.0000      | 0.0000    |
| 8684.7829              | 7179.4868   | 323.9840   | -1505.2961  | 7248.5873 |
| 326.6475               | 65.5276     | 87.4023    | 664265.7895 | -14.9744  |
| -14.9728               |             |            |             |           |
| [23233]ENERGY: 6310000 | 3692.2128   | 5824.7811  | 5907.7035   |           |
| 368.2977               | -15446.8738 | -1847.1906 | 0.0000      | 0.0000    |
| 8681.7047              | 7180.6353   | 323.8691   | -1501.0693  | 7248.5303 |
| 326.8555               | 39.3677     | 47.2622    | 664265.7895 | -18.3350  |
| -18.3474               |             |            |             |           |
| [23269]ENERGY: 6320000 | 3760.4163   | 5656.3067  | 5857.2137   |           |
| 336.1740               | -15406.5680 | -1826.6284 | 0.0000      | 0.0000    |
| 8801.8032              | 7178.7175   | 328.3494   | -1623.0857  | 7248.8230 |
| 326.8245               | -161.3310   | -165.0525  | 664265.7895 | -19.4019  |
| -19.3947               |             |            |             |           |

## Supplementary Text 6

|                        |             |            |             |           |
|------------------------|-------------|------------|-------------|-----------|
| [23319]ENERGY: 6330000 | 3598.1229   | 5743.8320  | 5974.5900   |           |
| 362.7978               | -15452.8727 | -1852.8391 | 0.0000      | 0.0000    |
| 8803.8200              | 7177.4509   | 328.4246   | -1626.3691  | 7250.4921 |
| 326.7227               | -70.0389    | -78.4974   | 664265.7895 | -17.4010  |
| -17.3981               |             |            |             |           |
| [23355]ENERGY: 6340000 | 3545.3331   | 5840.6666  | 5947.7802   |           |
| 345.0837               | -15399.2050 | -1868.5494 | 0.0000      | 0.0000    |
| 8768.3334              | 7179.4427   | 327.1008   | -1588.8907  | 7251.3324 |
| 326.7619               | 44.0492     | 124.4586   | 664265.7895 | -15.4472  |
| -15.4487               |             |            |             |           |
| [23405]ENERGY: 6350000 | 3508.2761   | 5873.3539  | 5941.0739   |           |
| 372.3324               | -15440.3306 | -1889.3295 | 0.0000      | 0.0000    |
| 8813.8442              | 7179.2203   | 328.7986   | -1634.6239  | 7251.1946 |
| 326.6550               | 79.6594     | 14.6624    | 664265.7895 | -16.0051  |
| -16.0312               |             |            |             |           |
| [23441]ENERGY: 6360000 | 3554.3595   | 5792.0219  | 5872.8878   |           |
| 375.0159               | -15362.6272 | -1856.7246 | 0.0000      | 0.0000    |
| 8805.1553              | 7180.0888   | 328.4744   | -1625.0666  | 7251.4326 |
| 326.6303               | -102.0561   | -110.3846  | 664265.7895 | -10.6657  |
| -10.6392               |             |            |             |           |
| [23491]ENERGY: 6370000 | 3602.6549   | 5734.1072  | 5872.4151   |           |
| 329.9573               | -15284.5251 | -1893.4999 | 0.0000      | 0.0000    |
| 8819.0219              | 7180.1314   | 328.9917   | -1638.8905  | 7251.7558 |
| 326.3442               | 49.1459     | -64.2689   | 664265.7895 | -15.2968  |
| -15.2962               |             |            |             |           |
| [23527]ENERGY: 6380000 | 3634.2997   | 5772.9318  | 5889.8937   |           |
| 344.5918               | -15493.3971 | -1799.4743 | 0.0000      | 0.0000    |
| 8828.9510              | 7177.7966   | 329.3621   | -1651.1544  | 7249.6338 |
| 326.4421               | 30.0378     | 59.0669    | 664265.7895 | -18.1644  |
| -18.1643               |             |            |             |           |
| [23577]ENERGY: 6390000 | 3493.1713   | 5777.8183  | 5919.0901   |           |
| 363.9893               | -15280.9690 | -1837.5452 | 0.0000      | 0.0000    |
| 8741.1752              | 7176.7300   | 326.0877   | -1564.4453  | 7248.5589 |
| 326.4732               | -30.3603    | -0.5966    | 664265.7895 | -18.8989  |
| -18.8831               |             |            |             |           |
| [23616]ENERGY: 6400000 | 3583.6165   | 5830.7456  | 5850.3855   |           |
| 354.5441               | -15342.7902 | -1852.2155 | 0.0000      | 0.0000    |
| 8756.4257              | 7180.7116   | 326.6566   | -1575.7141  | 7249.3982 |
| 326.5650               | 139.8924    | 60.9741    | 664265.7895 | -19.2059  |
| -19.2302               |             |            |             |           |
| [23666]ENERGY: 6410000 | 3552.4939   | 5866.3957  | 5834.7017   |           |
| 361.8856               | -15351.8333 | -1904.2841 | 0.0000      | 0.0000    |
| 8820.0750              | 7179.4343   | 329.0310   | -1640.6406  | 7250.1520 |
| 326.9749               | -31.4529    | 12.2521    | 664265.7895 | -21.8852  |
| -21.8777               |             |            |             |           |
| [23702]ENERGY: 6420000 | 3674.4665   | 5801.4727  | 5879.8163   |           |
| 385.5282               | -15366.6012 | -1868.2121 | 0.0000      | 0.0000    |
| 8674.6367              | 7181.1071   | 323.6055   | -1493.5296  | 7249.2874 |
| 327.0322               | -80.4083    | -87.8043   | 664265.7895 | -22.7161  |
| -22.7052               |             |            |             |           |
| [23752]ENERGY: 6430000 | 3685.6162   | 5854.5033  | 5869.8219   |           |
| 356.1447               | -15428.6263 | -1883.2397 | 0.0000      | 0.0000    |
| 8722.9140              | 7177.1341   | 325.4064   | -1545.7799  | 7249.3526 |
| 326.7977               | -40.7576    | -17.8137   | 664265.7895 | -25.0900  |

Supplementary Text 6

-25.1118  
 [23788]ENERGY: 6440000      3589.4336      5828.0652      5914.2000  
 333.1509      -15307.0242      -1893.3194      0.0000      0.0000  
 8711.7229      7176.2290      324.9889      -1535.4939      7249.5544  
 326.7838      -94.6012      -161.4884      664265.7895      -20.1541  
 -20.1401  
 [23838]ENERGY: 6450000      3619.4567      5803.2815      5919.0188  
 349.4177      -15416.2955      -1842.8556      0.0000      0.0000  
 8745.0965      7177.1199      326.2339      -1567.9765      7249.2867  
 326.6976      -157.2185      -128.6319      664265.7895      -20.3156  
 -20.3235  
 [23874]ENERGY: 6460000      3596.5634      5873.1299      5868.2292  
 345.5715      -15445.3375      -1861.3169      0.0000      0.0000  
 8799.7058      7176.5455      328.2711      -1623.1603      7250.2022  
 326.8639      81.7548      55.7118      664265.7895      -16.0265  
 -16.0333  
 [23924]ENERGY: 6470000      3552.3610      5819.2340      5871.2994  
 383.4457      -15345.7342      -1909.9165      0.0000      0.0000  
 8803.0948      7173.7842      328.3976      -1629.3106      7250.6217  
 326.7941      -63.6923      -96.9363      664265.7895      -20.2605  
 -20.2466  
 [23960]ENERGY: 6480000      3608.5919      5875.3550      5903.4336  
 345.3016      -15493.5387      -1835.2503      0.0000      0.0000  
 8774.0937      7177.9868      327.3157      -1596.1069      7251.3266  
 326.6003      -199.6881      -155.6529      664265.7895      -16.7532  
 -16.7422  
 [24010]ENERGY: 6490000      3551.0791      5826.9430      5938.5999  
 370.4839      -15382.4381      -1845.1799      0.0000      0.0000  
 8722.5383      7182.0262      325.3924      -1540.5121      7252.4920  
 326.7084      -81.5194      -53.7840      664265.7895      -17.4311  
 -17.4368  
 [24049]ENERGY: 6500000      3560.7369      5863.9946      5890.1037  
 366.0784      -15383.5760      -1802.7183      0.0000      0.0000  
 8687.9548      7182.5741      324.1023      -1505.3807      7251.3754  
 326.6085      -68.0470      -89.0805      664265.7895      -18.2757  
 -18.2749  
 [24099]ENERGY: 6510000      3629.0721      5868.6113      5862.7306  
 368.1782      -15408.6355      -1887.2558      0.0000      0.0000  
 8749.4078      7182.1087      326.3948      -1567.2991      7251.8308  
 326.7384      182.8134      58.9448      664265.7895      -16.4786  
 -16.4902  
 [24135]ENERGY: 6520000      3566.9393      5880.1390      5940.6555  
 386.4662      -15517.9536      -1854.8577      0.0000      0.0000  
 8779.2534      7180.6421      327.5082      -1598.6113      7250.1942  
 327.0003      -23.3345      34.7980      664265.7895      -10.2185  
 -10.1870  
 [24185]ENERGY: 6530000      3579.3321      5782.3326      5925.1189  
 383.1088      -15399.6879      -1869.4926      0.0000      0.0000  
 8779.2520      7179.9639      327.5081      -1599.2881      7251.3443  
 326.8907      87.4024      66.7488      664265.7895      -11.8304  
 -11.8604  
 [24221]ENERGY: 6540000      3614.1458      5824.3209      5952.3923  
 358.9562      -15393.7341      -1915.3882      0.0000      0.0000  
 8741.9875      7182.6803      326.1180      -1559.3072      7252.7941

Supplementary Text 6

|                        |             |            |             |           |
|------------------------|-------------|------------|-------------|-----------|
| 326.7566               | -34.8757    | -42.5580   | 664265.7895 | -15.4703  |
| -15.4669               |             |            |             |           |
| [24271]ENERGY: 6550000 | 3654.2888   | 5840.6943  | 5939.3914   |           |
| 375.2493               | -15349.7040 | -1931.4773 | 0.0000      | 0.0000    |
| 8659.9643              | 7188.4069   | 323.0581   | -1471.5574  | 7253.4643 |
| 326.7843               | 31.6123     | -30.3568   | 664265.7895 | -18.0503  |
| -18.0506               |             |            |             |           |
| [24307]ENERGY: 6560000 | 3609.7562   | 5819.8477  | 5925.8118   |           |
| 355.3011               | -15332.0963 | -1861.7535 | 0.0000      | 0.0000    |
| 8669.0704              | 7185.9376   | 323.3978   | -1483.1328  | 7253.3608 |
| 326.6756               | 132.9912    | 62.3297    | 664265.7895 | -17.8223  |
| -17.8368               |             |            |             |           |
| [24357]ENERGY: 6570000 | 3588.0015   | 5787.8798  | 5905.9738   |           |
| 354.2337               | -15367.8532 | -1878.8464 | 0.0000      | 0.0000    |
| 8793.0634              | 7182.4525   | 328.0233   | -1610.6109  | 7252.8120 |
| 326.6628               | 54.1639     | -48.5607   | 664265.7895 | -16.9411  |
| -16.9268               |             |            |             |           |
| [24393]ENERGY: 6580000 | 3631.8554   | 5857.6220  | 5961.8947   |           |
| 387.3147               | -15471.9019 | -1839.3152 | 0.0000      | 0.0000    |
| 8657.7735              | 7185.2432   | 322.9764   | -1472.5303  | 7253.7309 |
| 326.5771               | 163.4038    | 168.6800   | 664265.7895 | -15.8738  |
| -15.8655               |             |            |             |           |
| [24443]ENERGY: 6590000 | 3590.8269   | 5748.3252  | 5913.2755   |           |
| 335.1365               | -15352.3317 | -1858.1188 | 0.0000      | 0.0000    |
| 8806.8544              | 7183.9682   | 328.5378   | -1622.8863  | 7253.9593 |
| 326.6395               | -96.0983    | -98.8028   | 664265.7895 | -18.3041  |
| -18.3132               |             |            |             |           |
| [24482]ENERGY: 6600000 | 3603.8132   | 5761.0494  | 5923.6268   |           |
| 357.1663               | -15373.6095 | -1821.0608 | 0.0000      | 0.0000    |
| 8735.4234              | 7186.4089   | 325.8731   | -1549.0145  | 7253.9933 |
| 326.7786               | 36.5368     | 105.3964   | 664265.7895 | -11.7298  |
| -11.7372               |             |            |             |           |
| [24532]ENERGY: 6610000 | 3593.8346   | 5785.9719  | 5885.1509   |           |
| 343.8818               | -15367.2123 | -1847.0824 | 0.0000      | 0.0000    |
| 8791.9568              | 7186.5013   | 327.9821   | -1605.4555  | 7254.0284 |
| 326.8704               | 106.1304    | 78.9613    | 664265.7895 | -11.1648  |
| -11.1636               |             |            |             |           |
| [24568]ENERGY: 6620000 | 3619.1854   | 5832.2000  | 5963.1991   |           |
| 346.2042               | -15433.9079 | -1896.7689 | 0.0000      | 0.0000    |
| 8753.1098              | 7183.2217   | 326.5329   | -1569.8881  | 7254.0656 |
| 326.8566               | 16.9411     | -50.1216   | 664265.7895 | -12.4587  |
| -12.4759               |             |            |             |           |
| [24618]ENERGY: 6630000 | 3591.6409   | 5788.0494  | 5921.2962   |           |
| 370.8275               | -15389.4318 | -1833.6051 | 0.0000      | 0.0000    |
| 8734.5719              | 7183.3490   | 325.8413   | -1551.2229  | 7255.2419 |
| 327.0881               | 6.5754      | -38.3226   | 664265.7895 | -12.2096  |
| -12.1895               |             |            |             |           |
| [24654]ENERGY: 6640000 | 3609.9116   | 5799.7581  | 5982.8195   |           |
| 355.2289               | -15504.1347 | -1846.3335 | 0.0000      | 0.0000    |
| 8781.9495              | 7179.1994   | 327.6087   | -1602.7501  | 7254.5432 |
| 326.6923               | 13.5942     | -33.1326   | 664265.7895 | -13.0495  |
| -13.0572               |             |            |             |           |
| [24704]ENERGY: 6650000 | 3545.6914   | 5809.5549  | 5874.6068   |           |
| 359.2223               | -15375.9918 | -1815.5474 | 0.0000      | 0.0000    |

## Supplementary Text 6

|                        |             |            |             |           |
|------------------------|-------------|------------|-------------|-----------|
| 8786.4394              | 7183.9756   | 327.7762   | -1602.4637  | 7253.9218 |
| 326.8215               | 11.9179     | -57.1084   | 664265.7895 | -13.2763  |
| -13.2759               |             |            |             |           |
| [24740]ENERGY: 6660000 | 3644.0939   | 5861.7475  | 5925.1325   |           |
| 336.3792               | -15420.5391 | -1883.0939 | 0.0000      | 0.0000    |
| 8717.6747              | 7181.3947   | 325.2110   | -1536.2800  | 7252.5324 |
| 326.8341               | -139.9287   | -164.0442  | 664265.7895 | -5.5975   |
| -5.5929                |             |            |             |           |
| [24790]ENERGY: 6670000 | 3602.4796   | 5832.2300  | 5897.4211   |           |
| 342.2975               | -15353.1828 | -1892.3822 | 0.0000      | 0.0000    |
| 8755.9020              | 7184.7653   | 326.6370   | -1571.1368  | 7255.3479 |
| 326.8837               | 134.1911    | 98.9722    | 664265.7895 | -8.1110   |
| -8.1107                |             |            |             |           |
| [24826]ENERGY: 6680000 | 3558.4082   | 5806.8083  | 5896.7934   |           |
| 345.8722               | -15326.4090 | -1838.7948 | 0.0000      | 0.0000    |
| 8743.7527              | 7186.4310   | 326.1838   | -1557.3217  | 7257.2754 |
| 326.8006               | 140.2935    | 83.9341    | 664265.7895 | -9.8547   |
| -9.8550                |             |            |             |           |
| [24876]ENERGY: 6690000 | 3615.1797   | 5952.6949  | 5905.6315   |           |
| 352.3475               | -15411.4812 | -1911.2324 | 0.0000      | 0.0000    |
| 8682.9227              | 7186.0628   | 323.9146   | -1496.8599  | 7255.7434 |
| 326.7959               | -39.2072    | -40.9212   | 664265.7895 | -13.0716  |
| -13.0601               |             |            |             |           |
| [24915]ENERGY: 6700000 | 3581.9732   | 5874.0512  | 5911.6951   |           |
| 345.2066               | -15353.7818 | -1850.3393 | 0.0000      | 0.0000    |
| 8677.8109              | 7186.6158   | 323.7239   | -1491.1950  | 7256.9064 |
| 326.6762               | -38.0279    | -103.8978  | 664265.7895 | -15.9417  |
| -15.9590               |             |            |             |           |
| [24965]ENERGY: 6710000 | 3637.7423   | 5843.7273  | 5915.5795   |           |
| 341.9452               | -15451.3777 | -1858.9823 | 0.0000      | 0.0000    |
| 8759.5195              | 7188.1538   | 326.7720   | -1571.3657  | 7256.9080 |
| 326.7330               | -81.3966    | -135.3173  | 664265.7895 | -17.1303  |
| -17.1247               |             |            |             |           |
| [25001]ENERGY: 6720000 | 3620.3714   | 5734.6084  | 5894.0189   |           |
| 371.8677               | -15311.3331 | -1896.6541 | 0.0000      | 0.0000    |
| 8773.4134              | 7186.2926   | 327.2903   | -1587.1208  | 7256.6727 |
| 326.8851               | -51.4441    | -37.9988   | 664265.7895 | -14.9692  |
| -14.9711               |             |            |             |           |
| [25051]ENERGY: 6730000 | 3757.0667   | 5835.1650  | 5940.9691   |           |
| 351.2056               | -15415.9459 | -1962.9585 | 0.0000      | 0.0000    |
| 8681.4705              | 7186.9724   | 323.8604   | -1494.4981  | 7257.0229 |
| 326.9687               | -273.8605   | -234.8621  | 664265.7895 | -16.3011  |
| -16.3050               |             |            |             |           |
| [25087]ENERGY: 6740000 | 3535.2956   | 5921.2074  | 5896.9623   |           |
| 353.4472               | -15368.7063 | -1848.3093 | 0.0000      | 0.0000    |
| 8697.7959              | 7187.6928   | 324.4694   | -1510.1032  | 7259.2598 |
| 327.1474               | -8.5877     | 17.1834    | 664265.7895 | -17.9479  |
| -17.9467               |             |            |             |           |
| [25137]ENERGY: 6750000 | 3549.9163   | 5905.5861  | 5915.6177   |           |
| 350.2539               | -15503.9403 | -1813.2503 | 0.0000      | 0.0000    |
| 8780.4166              | 7184.6000   | 327.5516   | -1595.8166  | 7259.4615 |
| 326.8172               | 102.4229    | 73.8261    | 664265.7895 | -15.7322  |
| -15.7271               |             |            |             |           |
| [25173]ENERGY: 6760000 | 3570.3282   | 5830.5859  | 5923.2389   |           |



## Supplementary Text 6

|                        |             |            |             |           |
|------------------------|-------------|------------|-------------|-----------|
| 371.2859               | -15388.7657 | -1873.9011 | 0.0000      | 0.0000    |
| 8755.4319              | 7188.2041   | 326.6195   | -1567.2279  | 7258.9337 |
| 326.7960               | -2.7473     | -15.9381   | 664265.7895 | -17.7213  |
| -17.6969               |             |            |             |           |
| [25223]ENERGY: 6770000 | 3603.2876   | 5817.9952  | 5933.4926   |           |
| 379.1882               | -15374.6617 | -1878.6095 | 0.0000      | 0.0000    |
| 8710.9559              | 7191.6483   | 324.9603   | -1519.3076  | 7258.7832 |
| 327.1665               | -24.0081    | 18.3526    | 664265.7895 | -13.9413  |
| -13.9508               |             |            |             |           |
| [25259]ENERGY: 6780000 | 3508.2221   | 5819.4808  | 5894.6285   |           |
| 341.3796               | -15446.9151 | -1800.2932 | 0.0000      | 0.0000    |
| 8866.3364              | 7182.8390   | 330.7568   | -1683.4974  | 7258.8182 |
| 327.1256               | 66.2976     | 33.8283    | 664265.7895 | -19.8722  |
| -19.8842               |             |            |             |           |
| [25309]ENERGY: 6790000 | 3585.8908   | 5724.2229  | 5944.3132   |           |
| 344.2387               | -15407.1121 | -1918.1422 | 0.0000      | 0.0000    |
| 8909.5915              | 7183.0029   | 332.3704   | -1726.5886  | 7258.9155 |
| 326.9019               | -38.3039    | -52.9671   | 664265.7895 | -16.2987  |
| -16.2984               |             |            |             |           |
| [25348]ENERGY: 6800000 | 3666.2414   | 5771.0005  | 5940.6382   |           |
| 355.7174               | -15358.7458 | -1904.2388 | 0.0000      | 0.0000    |
| 8719.8788              | 7190.4917   | 325.2932   | -1529.3871  | 7259.7955 |
| 326.9361               | -134.8973   | -100.1877  | 664265.7895 | -14.3176  |
| -14.3083               |             |            |             |           |
| [25398]ENERGY: 6810000 | 3651.4491   | 5810.6068  | 5957.1965   |           |
| 341.2226               | -15460.5818 | -1820.2147 | 0.0000      | 0.0000    |
| 8711.0521              | 7190.7305   | 324.9639   | -1520.3216  | 7258.6071 |
| 327.2004               | -78.2519    | 18.5473    | 664265.7895 | -16.8419  |
| -16.8336               |             |            |             |           |
| [25434]ENERGY: 6820000 | 3578.7770   | 5838.0034  | 5895.6130   |           |
| 364.6988               | -15460.2020 | -1881.7281 | 0.0000      | 0.0000    |
| 8850.0999              | 7185.2621   | 330.1511   | -1664.8378  | 7259.1666 |
| 327.3037               | -7.5834     | -70.5101   | 664265.7895 | -12.5513  |
| -12.5688               |             |            |             |           |
| [25484]ENERGY: 6830000 | 3555.6387   | 5786.4891  | 5876.0044   |           |
| 386.4541               | -15348.7705 | -1800.0186 | 0.0000      | 0.0000    |
| 8732.2095              | 7188.0066   | 325.7532   | -1544.2028  | 7259.4293 |
| 326.8525               | 43.0934     | -14.5452   | 664265.7895 | -13.5079  |
| -13.5074               |             |            |             |           |
| [25520]ENERGY: 6840000 | 3612.3838   | 5741.4500  | 5919.7571   |           |
| 343.3059               | -15337.8117 | -1877.1615 | 0.0000      | 0.0000    |
| 8789.1292              | 7191.0528   | 327.8766   | -1598.0764  | 7260.1427 |
| 326.9409               | -152.9587   | -155.2226  | 664265.7895 | -18.6644  |
| -18.6712               |             |            |             |           |
| [25570]ENERGY: 6850000 | 3583.1077   | 5772.7511  | 5860.2704   |           |
| 353.1318               | -15331.5229 | -1865.2298 | 0.0000      | 0.0000    |
| 8816.2323              | 7188.7407   | 328.8876   | -1627.4916  | 7262.7005 |
| 326.9498               | -70.0170    | -77.1376   | 664265.7895 | -15.9563  |
| -15.9542               |             |            |             |           |
| [25606]ENERGY: 6860000 | 3562.1780   | 5800.2130  | 5849.2403   |           |
| 376.0448               | -15293.5750 | -1899.5878 | 0.0000      | 0.0000    |
| 8798.4981              | 7193.0114   | 328.2261   | -1605.4867  | 7265.4008 |
| 327.1044               | -54.6051    | -115.2960  | 664265.7895 | -15.2216  |
| -15.2225               |             |            |             |           |

## Supplementary Text 6

|                        |             |            |             |           |
|------------------------|-------------|------------|-------------|-----------|
| [25656]ENERGY: 6870000 | 3514.4365   | 5792.6364  | 5873.7426   |           |
| 358.5723               | -15342.8403 | -1880.3016 | 0.0000      | 0.0000    |
| 8874.2420              | 7190.4879   | 331.0517   | -1683.7541  | 7263.4749 |
| 327.2929               | 7.3854      | 5.6313     | 664265.7895 | -14.5057  |
| -14.4899               |             |            |             |           |
| [25692]ENERGY: 6880000 | 3521.0652   | 5769.9873  | 5899.2937   |           |
| 349.0331               | -15330.9802 | -1875.2292 | 0.0000      | 0.0000    |
| 8860.2149              | 7193.3848   | 330.5284   | -1666.8300  | 7264.0624 |
| 327.0665               | 16.3694     | 79.3877    | 664265.7895 | -19.4982  |
| -19.5015               |             |            |             |           |
| [25742]ENERGY: 6890000 | 3643.0395   | 5758.2507  | 5877.3322   |           |
| 361.6202               | -15343.2754 | -1884.2758 | 0.0000      | 0.0000    |
| 8780.5988              | 7193.2901   | 327.5583   | -1587.3086  | 7266.7175 |
| 327.1118               | 30.1653     | -14.7519   | 664265.7895 | -16.9306  |
| -16.9535               |             |            |             |           |
| [25781]ENERGY: 6900000 | 3593.3200   | 5730.2732  | 5831.1247   |           |
| 357.2706               | -15316.3114 | -1897.9768 | 0.0000      | 0.0000    |
| 8894.3430              | 7192.0433   | 331.8015   | -1702.2996  | 7266.9689 |
| 327.1343               | -28.0329    | -42.8644   | 664265.7895 | -16.4231  |
| -16.4151               |             |            |             |           |
| [25831]ENERGY: 6910000 | 3553.2708   | 5871.6620  | 5952.4973   |           |
| 329.8837               | -15469.8080 | -1839.6758 | 0.0000      | 0.0000    |
| 8797.7338              | 7195.5637   | 328.1976   | -1602.1700  | 7268.1285 |
| 327.1140               | 155.1506    | 69.7836    | 664265.7895 | -14.5773  |
| -14.5765               |             |            |             |           |
| [25867]ENERGY: 6920000 | 3621.5064   | 5767.1888  | 5974.6516   |           |
| 374.0080               | -15441.2331 | -1828.5098 | 0.0000      | 0.0000    |
| 8730.1182              | 7197.7302   | 325.6752   | -1532.3880  | 7267.8389 |
| 327.1371               | -66.1245    | -145.8273  | 664265.7895 | -15.7375  |
| -15.7240               |             |            |             |           |
| [25917]ENERGY: 6930000 | 3616.3720   | 5803.4823  | 5921.4158   |           |
| 350.6259               | -15330.9708 | -1873.7661 | 0.0000      | 0.0000    |
| 8713.1914              | 7200.3505   | 325.0437   | -1512.8410  | 7268.5638 |
| 326.9558               | -24.8419    | 50.9971    | 664265.7895 | -18.5414  |
| -18.5219               |             |            |             |           |
| [25953]ENERGY: 6940000 | 3577.6393   | 5860.4032  | 5938.1126   |           |
| 347.8833               | -15406.2825 | -1865.3058 | 0.0000      | 0.0000    |
| 8746.4233              | 7198.8736   | 326.2834   | -1547.5497  | 7269.0656 |
| 327.0054               | 49.8200     | 3.7549     | 664265.7895 | -16.3973  |
| -16.4418               |             |            |             |           |
| [26003]ENERGY: 6950000 | 3645.2597   | 5776.7519  | 5911.7029   |           |
| 342.1397               | -15322.2778 | -1833.7480 | 0.0000      | 0.0000    |
| 8681.5061              | 7201.3346   | 323.8617   | -1480.1715  | 7268.9745 |
| 326.9256               | 1.9522      | -37.4468   | 664265.7895 | -17.1736  |
| -17.1578               |             |            |             |           |
| [26039]ENERGY: 6960000 | 3578.6188   | 5770.1612  | 5849.6619   |           |
| 373.2821               | -15252.5245 | -1808.8177 | 0.0000      | 0.0000    |
| 8690.5672              | 7200.9489   | 324.1997   | -1489.6183  | 7267.7654 |
| 326.8582               | 72.0083     | -35.8862   | 664265.7895 | -18.8663  |
| -18.8804               |             |            |             |           |
| [26089]ENERGY: 6970000 | 3619.3528   | 5906.5545  | 5937.9673   |           |
| 351.9834               | -15470.4730 | -1895.4923 | 0.0000      | 0.0000    |
| 8749.1454              | 7199.0379   | 326.3850   | -1550.1074  | 7270.6723 |
| 327.0311               | -200.2502   | -124.8708  | 664265.7895 | -18.0994  |

Supplementary Text 6

-18.0839  
 [26125]ENERGY: 6980000 3555.7928 5868.0424 5933.8610  
 348.5648 -15464.0294 -1838.6687 0.0000 0.0000  
 8795.3451 7198.9080 328.1085 -1596.4371 7270.3623  
 327.0584 -102.5366 -98.4743 664265.7895 -16.3064  
 -16.2978  
 [26175]ENERGY: 6990000 3540.4747 5818.4280 5896.8781  
 351.5640 -15365.8246 -1873.4022 0.0000 0.0000  
 8828.5864 7196.7045 329.3485 -1631.8820 7270.3434  
 326.9516 26.3120 11.6385 664265.7895 -21.5265  
 -21.5186  
 [26214]ENERGY: 7000000 3582.8810 5906.3623 5935.9308  
 380.6244 -15407.3326 -1839.4348 0.0000 0.0000  
 8639.1779 7198.2089 322.2827 -1440.9690 7270.7442  
 326.9557 -52.5796 -69.8131 664265.7895 -19.9129  
 -19.9418  
 [26264]ENERGY: 7010000 3610.9637 5867.3276 5890.7360  
 373.1837 -15396.4527 -1829.7076 0.0000 0.0000  
 8681.8821 7197.9327 323.8757 -1483.9494 7269.9410  
 327.0432 12.3125 16.2573 664265.7895 -8.2505  
 -8.2572  
 [26300]ENERGY: 7020000 3573.2955 5830.4228 5896.9325  
 365.9056 -15294.2471 -1809.8907 0.0000 0.0000  
 8640.1474 7202.5660 322.3188 -1437.5814 7271.6935  
 326.9326 -9.6104 -6.4851 664265.7895 -15.5761  
 -15.5671  
 [26350]ENERGY: 7030000 3483.7422 5713.2787 5885.7855  
 346.1206 -15161.8893 -1901.2433 0.0000 0.0000  
 8834.1614 7199.9557 329.5565 -1634.2057 7271.9601  
 326.7149 84.4723 12.6125 664265.7895 -15.0598  
 -15.0613  
 [26386]ENERGY: 7040000 3613.2228 5708.1508 5885.6084  
 363.3407 -15268.5143 -1857.8670 0.0000 0.0000  
 8756.8636 7200.8050 326.6729 -1556.0587 7271.4129  
 326.6442 -144.3705 -83.5515 664265.7895 -20.0621  
 -20.0493  
 [26436]ENERGY: 7050000 3636.0751 5862.4985 5892.1288  
 345.1575 -15324.1389 -1894.8546 0.0000 0.0000  
 8686.9655 7203.8319 324.0654 -1483.1336 7272.9787  
 326.7718 -179.7306 -34.4568 664265.7895 -17.1178  
 -17.0943  
 [26472]ENERGY: 7060000 3600.7573 5707.3054 5882.8654  
 347.0974 -15276.7019 -1768.8761 0.0000 0.0000  
 8712.2586 7204.7061 325.0089 -1507.5525 7272.3530  
 326.7070 258.4100 227.4650 664265.7895 -18.7814  
 -18.8112  
 [26522]ENERGY: 7070000 3563.3645 5805.9809 5886.8011  
 376.1101 -15319.4936 -1874.6199 0.0000 0.0000  
 8766.8872 7205.0303 327.0468 -1561.8569 7273.7314  
 326.9271 22.0757 -3.3624 664265.7895 -18.3857  
 -18.3822  
 [26558]ENERGY: 7080000 3635.6741 5735.7575 5927.5127  
 373.5332 -15366.8996 -1865.8787 0.0000 0.0000  
 8761.3928 7201.0921 326.8419 -1560.3007 7272.3983

Supplementary Text 6

|                        |             |            |             |           |
|------------------------|-------------|------------|-------------|-----------|
| 326.7938               | 20.2359     | -13.7547   | 664265.7895 | -16.3109  |
| -16.3041               |             |            |             |           |
| [26608]ENERGY: 7090000 | 3638.6585   | 5825.2811  | 5866.6354   |           |
| 349.4560               | -15404.9881 | -1837.6184 | 0.0000      | 0.0000    |
| 8764.1299              | 7201.5543   | 326.9440   | -1562.5755  | 7273.2840 |
| 327.0828               | 12.4162     | -49.8009   | 664265.7895 | -14.5629  |
| -14.5598               |             |            |             |           |
| [26647]ENERGY: 7100000 | 3607.5189   | 5742.4519  | 5926.3605   |           |
| 372.0260               | -15340.3490 | -1885.5342 | 0.0000      | 0.0000    |
| 8778.1810              | 7200.6550   | 327.4681   | -1577.5259  | 7272.5990 |
| 327.0659               | -87.3077    | -15.6162   | 664265.7895 | -17.2573  |
| -17.2484               |             |            |             |           |
| [26697]ENERGY: 7110000 | 3635.6233   | 5819.8995  | 5900.2288   |           |
| 348.8217               | -15300.0138 | -1866.3356 | 0.0000      | 0.0000    |
| 8670.4686              | 7208.6924   | 323.4500   | -1461.7762  | 7274.5660 |
| 327.1710               | 152.5674    | -41.4010   | 664265.7895 | -20.4930  |
| -20.5026               |             |            |             |           |
| [26733]ENERGY: 7120000 | 3612.8994   | 5986.6852  | 5866.9117   |           |
| 337.3792               | -15403.8222 | -1895.3854 | 0.0000      | 0.0000    |
| 8700.2797              | 7204.9476   | 324.5621   | -1495.3321  | 7274.6369 |
| 326.9242               | -10.8395    | 46.9065    | 664265.7895 | -17.9653  |
| -17.9623               |             |            |             |           |
| [26783]ENERGY: 7130000 | 3506.7478   | 5843.5557  | 5910.0085   |           |
| 372.1280               | -15301.1028 | -1799.0732 | 0.0000      | 0.0000    |
| 8674.4597              | 7206.7236   | 323.5989   | -1467.7361  | 7273.6501 |
| 326.7572               | 117.2652    | 104.1046   | 664265.7895 | -17.7427  |
| -17.7500               |             |            |             |           |
| [26819]ENERGY: 7140000 | 3572.3408   | 5867.9442  | 5928.7372   |           |
| 360.9351               | -15399.1924 | -1844.7091 | 0.0000      | 0.0000    |
| 8719.0534              | 7205.1091   | 325.2624   | -1513.9443  | 7272.3063 |
| 326.9556               | 7.1149      | 36.5708    | 664265.7895 | -19.3412  |
| -19.3493               |             |            |             |           |
| [26869]ENERGY: 7150000 | 3581.3928   | 5709.5733  | 5890.2340   |           |
| 346.2629               | -15389.6250 | -1786.5664 | 0.0000      | 0.0000    |
| 8851.0485              | 7202.3201   | 330.1865   | -1648.7284  | 7272.6989 |
| 326.7867               | 104.6474    | 2.3866     | 664265.7895 | -18.1575  |
| -18.1533               |             |            |             |           |
| [26905]ENERGY: 7160000 | 3542.7836   | 5822.3109  | 5908.9097   |           |
| 359.0312               | -15416.1422 | -1814.0178 | 0.0000      | 0.0000    |
| 8798.6956              | 7201.5710   | 328.2334   | -1597.1246  | 7273.8732 |
| 326.9855               | 6.6784      | 23.8537    | 664265.7895 | -18.1134  |
| -18.1094               |             |            |             |           |
| [26955]ENERGY: 7170000 | 3606.7220   | 5834.1512  | 5890.5071   |           |
| 339.0142               | -15305.1082 | -1872.8722 | 0.0000      | 0.0000    |
| 8711.4068              | 7203.8207   | 324.9772   | -1507.5860  | 7272.5728 |
| 327.2861               | 22.9448     | 56.7322    | 664265.7895 | -19.8568  |
| -19.8608               |             |            |             |           |
| [26991]ENERGY: 7180000 | 3562.4540   | 5828.6761  | 5962.7834   |           |
| 361.1803               | -15327.9401 | -1873.9248 | 0.0000      | 0.0000    |
| 8693.0808              | 7206.3096   | 324.2935   | -1486.7712  | 7272.7281 |
| 327.2525               | -81.0717    | -73.2078   | 664265.7895 | -15.0259  |
| -15.0229               |             |            |             |           |
| [27041]ENERGY: 7190000 | 3519.4473   | 5758.6227  | 5944.6035   |           |
| 357.6569               | -15250.8854 | -1874.8818 | 0.0000      | 0.0000    |

## Supplementary Text 6

|                        |             |            |             |           |
|------------------------|-------------|------------|-------------|-----------|
| 8752.6824              | 7207.2456   | 326.5169   | -1545.4368  | 7274.6957 |
| 327.1576               | 113.5774    | 64.0524    | 664265.7895 | -16.7267  |
| -16.7458               |             |            |             |           |
| [27080]ENERGY: 7200000 | 3501.8066   | 5780.0172  | 5946.6639   |           |
| 345.4985               | -15301.9492 | -1863.9057 | 0.0000      | 0.0000    |
| 8797.4048              | 7205.5361   | 328.1853   | -1591.8687  | 7275.0856 |
| 327.1158               | 92.9705     | 58.7524    | 664265.7895 | -17.2338  |
| -17.2043               |             |            |             |           |
| [27130]ENERGY: 7210000 | 3579.8067   | 5871.1762  | 5903.7070   |           |
| 373.4485               | -15436.3648 | -1899.7256 | 0.0000      | 0.0000    |
| 8808.9399              | 7200.9879   | 328.6156   | -1607.9520  | 7275.0091 |
| 327.1999               | 148.6327    | 65.3302    | 664265.7895 | -18.9468  |
| -18.9646               |             |            |             |           |
| [27166]ENERGY: 7220000 | 3534.6374   | 5849.5830  | 5902.0016   |           |
| 381.3115               | -15389.7587 | -1868.6718 | 0.0000      | 0.0000    |
| 8790.4322              | 7199.5352   | 327.9252   | -1590.8971  | 7272.9665 |
| 327.2539               | -92.8601    | -42.2091   | 664265.7895 | -15.8045  |
| -15.7997               |             |            |             |           |
| [27216]ENERGY: 7230000 | 3558.4316   | 5854.9789  | 5926.3104   |           |
| 360.9498               | -15348.9050 | -1876.5449 | 0.0000      | 0.0000    |
| 8728.9233              | 7204.1441   | 325.6306   | -1524.7792  | 7274.6178 |
| 327.2295               | -29.2645    | 27.0555    | 664265.7895 | -16.1751  |
| -16.1701               |             |            |             |           |
| [27252]ENERGY: 7240000 | 3602.1155   | 5853.5669  | 5831.1224   |           |
| 345.8624               | -15320.5786 | -1849.2400 | 0.0000      | 0.0000    |
| 8742.2755              | 7205.1241   | 326.1287   | -1537.1514  | 7275.1723 |
| 327.1115               | 107.8990    | 38.3950    | 664265.7895 | -14.1447  |
| -14.1435               |             |            |             |           |
| [27302]ENERGY: 7250000 | 3596.8467   | 5812.6637  | 5858.9996   |           |
| 357.5417               | -15324.4819 | -1883.4066 | 0.0000      | 0.0000    |
| 8786.6158              | 7204.7790   | 327.7828   | -1581.8368  | 7273.2736 |
| 327.2205               | -113.3623   | -77.5744   | 664265.7895 | -19.7593  |
| -19.7462               |             |            |             |           |
| [27338]ENERGY: 7260000 | 3609.2207   | 5710.2446  | 5890.5917   |           |
| 376.9554               | -15373.1382 | -1859.2562 | 0.0000      | 0.0000    |
| 8844.2099              | 7198.8277   | 329.9313   | -1645.3821  | 7272.4763 |
| 327.3728               | 56.5513     | 22.7752    | 664265.7895 | -22.4662  |
| -22.4891               |             |            |             |           |
| [27388]ENERGY: 7270000 | 3550.7954   | 5856.3487  | 5902.3828   |           |
| 368.2155               | -15416.7494 | -1825.8847 | 0.0000      | 0.0000    |
| 8771.5234              | 7206.6316   | 327.2198   | -1564.8918  | 7273.3371 |
| 327.2003               | 68.3206     | 46.7888    | 664265.7895 | -23.2119  |
| -23.1933               |             |            |             |           |
| [27424]ENERGY: 7280000 | 3572.6765   | 5855.5230  | 5918.4192   |           |
| 360.6484               | -15454.2594 | -1851.8926 | 0.0000      | 0.0000    |
| 8795.7848              | 7196.8999   | 328.1249   | -1598.8849  | 7273.6347 |
| 327.2055               | -85.9055    | -100.4640  | 664265.7895 | -17.2887  |
| -17.3026               |             |            |             |           |
| [27474]ENERGY: 7290000 | 3534.5454   | 5758.4854  | 5882.8113   |           |
| 377.1628               | -15329.5287 | -1857.1961 | 0.0000      | 0.0000    |
| 8835.7577              | 7202.0378   | 329.6160   | -1633.7198  | 7275.1966 |
| 327.0397               | 4.8483      | -55.4180   | 664265.7895 | -18.6027  |
| -18.6126               |             |            |             |           |
| [27513]ENERGY: 7300000 | 3644.8470   | 5826.4860  | 5836.6950   |           |

## Supplementary Text 6

|                        |             |            |             |           |
|------------------------|-------------|------------|-------------|-----------|
| 360.3363               | -15388.0732 | -1866.0408 | 0.0000      | 0.0000    |
| 8789.4706              | 7203.7210   | 327.8893   | -1585.7495  | 7275.1372 |
| 327.2193               | 152.2672    | 45.7823    | 664265.7895 | -17.7571  |
| -17.7488               |             |            |             |           |
| [27563]ENERGY: 7310000 | 3615.5280   | 5760.4134  | 5910.1749   |           |
| 360.1259               | -15395.9207 | -1811.1390 | 0.0000      | 0.0000    |
| 8769.5386              | 7208.7211   | 327.1457   | -1560.8175  | 7275.9485 |
| 327.1615               | 27.6611     | -51.0062   | 664265.7895 | -22.1332  |
| -22.1300               |             |            |             |           |
| [27599]ENERGY: 7320000 | 3695.1898   | 5793.5632  | 5910.5944   |           |
| 360.6049               | -15433.8407 | -1858.7369 | 0.0000      | 0.0000    |
| 8739.8754              | 7207.2501   | 326.0392   | -1532.6253  | 7273.7201 |
| 327.1791               | -202.8772   | -116.4720  | 664265.7895 | -17.7546  |
| -17.7459               |             |            |             |           |
| [27649]ENERGY: 7330000 | 3586.2409   | 5821.1992  | 5907.4671   |           |
| 353.3239               | -15314.1449 | -1853.0244 | 0.0000      | 0.0000    |
| 8706.1302              | 7207.1920   | 324.7803   | -1498.9382  | 7276.2132 |
| 327.1311               | -112.8649   | -56.6777   | 664265.7895 | -15.4103  |
| -15.4137               |             |            |             |           |
| [27685]ENERGY: 7340000 | 3669.3719   | 5747.8097  | 5857.1240   |           |
| 382.4297               | -15343.0827 | -1825.7031 | 0.0000      | 0.0000    |
| 8715.5603              | 7203.5098   | 325.1321   | -1512.0505  | 7274.4953 |
| 327.0846               | 80.4699     | 85.2082    | 664265.7895 | -15.3766  |
| -15.3907               |             |            |             |           |
| [27735]ENERGY: 7350000 | 3557.1785   | 5739.9995  | 5891.0646   |           |
| 333.9991               | -15291.8130 | -1864.4345 | 0.0000      | 0.0000    |
| 8834.4315              | 7200.4258   | 329.5666   | -1634.0057  | 7275.1413 |
| 327.1591               | 98.2845     | -60.1441   | 664265.7895 | -19.4144  |
| -19.4049               |             |            |             |           |
| [27771]ENERGY: 7360000 | 3575.7535   | 5654.7095  | 5869.0082   |           |
| 365.4469               | -15279.6331 | -1854.5129 | 0.0000      | 0.0000    |
| 8870.8593              | 7201.6313   | 330.9255   | -1669.2280  | 7276.2545 |
| 327.0646               | -51.9830    | -70.6837   | 664265.7895 | -14.6722  |
| -14.6730               |             |            |             |           |
| [27821]ENERGY: 7370000 | 3560.7434   | 5846.8696  | 5901.8599   |           |
| 355.0400               | -15266.1502 | -1901.7364 | 0.0000      | 0.0000    |
| 8712.9952              | 7209.6215   | 325.0364   | -1503.3737  | 7276.3599 |
| 326.9210               | 73.2836     | -16.9477   | 664265.7895 | -15.8032  |
| -15.8031               |             |            |             |           |
| [27857]ENERGY: 7380000 | 3566.8073   | 5791.9383  | 5872.6772   |           |
| 370.8138               | -15291.0166 | -1808.9082 | 0.0000      | 0.0000    |
| 8703.5986              | 7205.9105   | 324.6859   | -1497.6881  | 7274.4620 |
| 326.9373               | 40.6839     | 50.5339    | 664265.7895 | -17.9223  |
| -17.9186               |             |            |             |           |
| [27907]ENERGY: 7390000 | 3572.5091   | 5792.5327  | 5894.1068   |           |
| 360.5976               | -15386.1980 | -1886.6387 | 0.0000      | 0.0000    |
| 8854.9450              | 7201.8545   | 330.3318   | -1653.0905  | 7274.5094 |
| 326.9484               | -179.4778   | -156.6848  | 664265.7895 | -16.1797  |
| -16.1730               |             |            |             |           |
| [27946]ENERGY: 7400000 | 3615.8891   | 5831.7279  | 5866.8396   |           |
| 340.4173               | -15288.9504 | -1906.3436 | 0.0000      | 0.0000    |
| 8747.2947              | 7206.8747   | 326.3159   | -1540.4200  | 7275.4584 |
| 327.1554               | -8.3443     | -74.3658   | 664265.7895 | -11.5195  |
| -11.5304               |             |            |             |           |

Supplementary Text 6

|                        |             |            |             |           |
|------------------------|-------------|------------|-------------|-----------|
| [27996]ENERGY: 7410000 | 3523.4083   | 5899.9358  | 5908.2337   |           |
| 364.5251               | -15401.8764 | -1985.7615 | 0.0000      | 0.0000    |
| 8894.0198              | 7202.4848   | 331.7895   | -1691.5350  | 7276.7885 |
| 327.2306               | 151.5572    | 53.8283    | 664265.7895 | -11.4919  |
| -11.4879               |             |            |             |           |
| [28032]ENERGY: 7420000 | 3581.3264   | 5868.1866  | 5893.9608   |           |
| 324.2618               | -15351.0619 | -1857.1493 | 0.0000      | 0.0000    |
| 8745.6375              | 7205.1620   | 326.2541   | -1540.4755  | 7275.9027 |
| 327.2275               | -232.2428   | -139.4893  | 664265.7895 | -9.9804   |
| -9.9910                |             |            |             |           |
| [28082]ENERGY: 7430000 | 3626.2763   | 5832.2689  | 5894.5593   |           |
| 333.1025               | -15272.4992 | -1958.6993 | 0.0000      | 0.0000    |
| 8753.0562              | 7208.0646   | 326.5309   | -1544.9916  | 7275.9602 |
| 327.0344               | -179.2164   | -153.4693  | 664265.7895 | -11.6103  |
| -11.6028               |             |            |             |           |
| [28118]ENERGY: 7440000 | 3594.9581   | 5793.2706  | 5937.7797   |           |
| 370.3395               | -15375.9598 | -1907.2309 | 0.0000      | 0.0000    |
| 8791.0838              | 7204.2410   | 327.9495   | -1586.8428  | 7275.7776 |
| 327.5462               | -120.7598   | -205.0618  | 664265.7895 | -9.8311   |
| -9.8309                |             |            |             |           |
| [28168]ENERGY: 7450000 | 3670.2354   | 5772.6751  | 5879.7123   |           |
| 350.3450               | -15317.3533 | -1881.6296 | 0.0000      | 0.0000    |
| 8731.2240              | 7205.2088   | 325.7164   | -1526.0152  | 7276.5865 |
| 327.5851               | -147.7973   | -144.8280  | 664265.7895 | -6.1954   |
| -6.2095                |             |            |             |           |
| [28204]ENERGY: 7460000 | 3613.0923   | 5857.1771  | 5849.0679   |           |
| 353.4916               | -15420.7371 | -1875.8936 | 0.0000      | 0.0000    |
| 8829.9329              | 7206.1311   | 329.3987   | -1623.8018  | 7276.8991 |
| 327.5183               | -27.3231    | -81.7017   | 664265.7895 | -8.4331   |
| -8.4308                |             |            |             |           |
| [28254]ENERGY: 7470000 | 3579.3339   | 5861.9201  | 5969.1294   |           |
| 344.2230               | -15370.8875 | -1920.5713 | 0.0000      | 0.0000    |
| 8740.1176              | 7203.2651   | 326.0482   | -1536.8525  | 7276.9586 |
| 327.4346               | 14.5709     | -60.4700   | 664265.7895 | -9.9127   |
| -9.9023                |             |            |             |           |
| [28290]ENERGY: 7480000 | 3574.8931   | 5859.0016  | 5841.5303   |           |
| 346.0696               | -15352.6299 | -1890.0354 | 0.0000      | 0.0000    |
| 8826.8101              | 7205.6393   | 329.2822   | -1621.1708  | 7278.0181 |
| 327.5922               | 2.4778      | -87.4920   | 664265.7895 | -11.3221  |
| -11.3406               |             |            |             |           |
| [28340]ENERGY: 7490000 | 3644.7182   | 5792.7611  | 5875.5080   |           |
| 355.3584               | -15373.2662 | -1887.9675 | 0.0000      | 0.0000    |
| 8799.1150              | 7206.2270   | 328.2491   | -1592.8879  | 7277.8069 |
| 327.5271               | -91.7746    | -76.6787   | 664265.7895 | -8.2655   |
| -8.2319                |             |            |             |           |
| [28379]ENERGY: 7500000 | 3604.2400   | 5813.7046  | 5907.5042   |           |
| 363.8957               | -15414.9170 | -1792.8807 | 0.0000      | 0.0000    |
| 8728.7603              | 7210.3071   | 325.6245   | -1518.4532  | 7278.5629 |
| 327.3362               | -19.4998    | 20.9233    | 664265.7895 | -8.7893   |
| -8.7984                |             |            |             |           |
| [28429]ENERGY: 7510000 | 3595.8576   | 5866.7397  | 5861.4346   |           |
| 376.0393               | -15419.0784 | -1832.3527 | 0.0000      | 0.0000    |
| 8758.6428              | 7207.2829   | 326.7393   | -1551.3599  | 7276.4555 |
| 327.3305               | -47.6766    | 7.5681     | 664265.7895 | -3.9839   |

Supplementary Text 6

-4.0070

|                        |             |            |                      |
|------------------------|-------------|------------|----------------------|
| [28465]ENERGY: 7520000 | 3614.7904   | 5905.5990  | 5858.1586            |
| 353.2042               | -15379.3987 | -1894.6773 | 0.0000 0.0000        |
| 8747.0475              | 7204.7236   | 326.3067   | -1542.3238 7277.7422 |
| 327.4365               | 10.5069     | 66.4535    | 664265.7895 -6.3297  |

-6.2967

|                        |             |            |                      |
|------------------------|-------------|------------|----------------------|
| [28515]ENERGY: 7530000 | 3606.6904   | 6023.3746  | 5852.7992            |
| 370.1458               | -15312.1089 | -1981.4315 | 0.0000 0.0000        |
| 8649.5262              | 7208.9957   | 322.6687   | -1440.5305 7279.2089 |
| 327.3437               | -77.5349    | -77.2767   | 664265.7895 -9.6506  |

-9.6594

|                        |             |            |                      |
|------------------------|-------------|------------|----------------------|
| [28551]ENERGY: 7540000 | 3637.3052   | 5815.5466  | 5905.5407            |
| 362.9994               | -15350.2820 | -1924.3488 | 0.0000 0.0000        |
| 8762.9198              | 7209.6809   | 326.8988   | -1553.2389 7278.7638 |
| 327.2066               | 131.0296    | 91.7614    | 664265.7895 -7.2221  |

-7.2397

|                        |             |            |                      |
|------------------------|-------------|------------|----------------------|
| [28601]ENERGY: 7550000 | 3596.8756   | 5772.7636  | 5887.6486            |
| 382.4618               | -15353.9912 | -1846.0100 | 0.0000 0.0000        |
| 8771.9184              | 7211.6668   | 327.2345   | -1560.2516 7279.6923 |
| 327.3509               | -73.6334    | -76.7826   | 664265.7895 -9.1408  |

-9.1583

|                        |             |            |                      |
|------------------------|-------------|------------|----------------------|
| [28637]ENERGY: 7560000 | 3544.0272   | 5942.7223  | 5859.5671            |
| 385.8821               | -15407.6982 | -1853.6738 | 0.0000 0.0000        |
| 8738.9307              | 7209.7573   | 326.0039   | -1529.1733 7279.8627 |
| 327.5583               | 145.6901    | 21.8938    | 664265.7895 -8.7845  |

-8.7886

|                        |             |            |                      |
|------------------------|-------------|------------|----------------------|
| [28687]ENERGY: 7570000 | 3591.6374   | 5909.1905  | 5885.3311            |
| 375.5956               | -15368.8723 | -1947.1348 | 0.0000 0.0000        |
| 8765.0898              | 7210.8373   | 326.9798   | -1554.2526 7281.2083 |
| 327.5878               | -115.4321   | -19.1397   | 664265.7895 -7.9096  |

-7.8808

|                        |             |            |                      |
|------------------------|-------------|------------|----------------------|
| [28723]ENERGY: 7580000 | 3564.0638   | 5839.0933  | 5888.0768            |
| 372.7734               | -15420.8531 | -1785.5020 | 0.0000 0.0000        |
| 8757.6160              | 7215.2682   | 326.7010   | -1542.3478 7282.3769 |
| 327.5671               | 175.2596    | 92.5184    | 664265.7895 -11.8532 |

-11.8607

|                        |             |            |                      |
|------------------------|-------------|------------|----------------------|
| [28773]ENERGY: 7590000 | 3537.8391   | 5799.1905  | 5879.4893            |
| 353.3207               | -15352.2830 | -1850.0612 | 0.0000 0.0000        |
| 8845.5550              | 7213.0504   | 329.9815   | -1632.5046 7283.3170 |
| 327.5735               | 127.8433    | 10.5099    | 664265.7895 -8.3628  |

-8.3537

|                        |             |            |                      |
|------------------------|-------------|------------|----------------------|
| [28812]ENERGY: 7600000 | 3513.7092   | 5804.0013  | 5924.9304            |
| 356.3851               | -15376.7921 | -1842.4072 | 0.0000 0.0000        |
| 8831.4102              | 7211.2369   | 329.4539   | -1620.1733 7282.3741 |
| 327.6420               | 160.2501    | 204.7227   | 664265.7895 -9.6323  |

-9.6322

|                        |             |            |                      |
|------------------------|-------------|------------|----------------------|
| [28862]ENERGY: 7610000 | 3620.5555   | 5758.8521  | 5848.0160            |
| 357.1828               | -15264.8244 | -1896.9685 | 0.0000 0.0000        |
| 8790.3258              | 7213.1393   | 327.9212   | -1577.1865 7281.4856 |
| 327.4910               | -19.1201    | -24.5453   | 664265.7895 -4.3876  |

-4.3854

|                        |             |            |                      |
|------------------------|-------------|------------|----------------------|
| [28898]ENERGY: 7620000 | 3578.5050   | 5717.4136  | 5912.7078            |
| 402.9215               | -15373.8918 | -1797.0225 | 0.0000 0.0000        |
| 8767.6714              | 7208.3051   | 327.0761   | -1559.3663 7282.0251 |



Supplementary Text 6

|                        |             |            |             |           |
|------------------------|-------------|------------|-------------|-----------|
| 327.4509               | 133.6339    | 98.5376    | 664265.7895 | -11.9278  |
| -11.9264               |             |            |             |           |
| [28948]ENERGY: 7630000 | 3573.1040   | 5843.5421  | 5936.2082   |           |
| 348.6305               | -15406.2102 | -1873.4933 | 0.0000      | 0.0000    |
| 8783.8310              | 7205.6123   | 327.6789   | -1578.2187  | 7281.0403 |
| 327.5834               | -71.2013    | -73.1622   | 664265.7895 | -9.5443   |
| -9.5430                |             |            |             |           |
| [28984]ENERGY: 7640000 | 3547.1225   | 5783.0265  | 5907.7853   |           |
| 362.0802               | -15357.8104 | -1850.6840 | 0.0000      | 0.0000    |
| 8820.0514              | 7211.5716   | 329.0301   | -1608.4798  | 7280.7249 |
| 327.6098               | 134.7311    | 59.2129    | 664265.7895 | -9.6485   |
| -9.6672                |             |            |             |           |
| [29034]ENERGY: 7650000 | 3613.2620   | 5820.7461  | 5921.3600   |           |
| 353.3521               | -15339.9581 | -1955.0520 | 0.0000      | 0.0000    |
| 8796.3161              | 7210.0261   | 328.1447   | -1586.2900  | 7282.5705 |
| 327.6070               | -189.5837   | -103.1513  | 664265.7895 | -6.6283   |
| -6.6131                |             |            |             |           |
| [29070]ENERGY: 7660000 | 3636.9106   | 5777.7713  | 5904.3096   |           |
| 367.7333               | -15367.9071 | -1875.1287 | 0.0000      | 0.0000    |
| 8769.5657              | 7213.2547   | 327.1468   | -1556.3110  | 7282.8307 |
| 327.5701               | -43.4520    | -43.8171   | 664265.7895 | -10.8336  |
| -10.8303               |             |            |             |           |
| [29120]ENERGY: 7670000 | 3480.0744   | 5753.3293  | 5869.0881   |           |
| 348.8094               | -15396.3006 | -1824.0036 | 0.0000      | 0.0000    |
| 8976.1506              | 7207.1476   | 334.8534   | -1769.0030  | 7282.2751 |
| 327.5194               | 180.6381    | 212.2698   | 664265.7895 | -8.8465   |
| -8.8395                |             |            |             |           |
| [29156]ENERGY: 7680000 | 3603.9942   | 5827.9973  | 5917.7309   |           |
| 353.1366               | -15440.0348 | -1852.0145 | 0.0000      | 0.0000    |
| 8804.3266              | 7215.1364   | 328.4435   | -1589.1902  | 7281.4010 |
| 327.5867               | -89.3718    | -63.3162   | 664265.7895 | -10.9855  |
| -10.9928               |             |            |             |           |
| [29206]ENERGY: 7690000 | 3573.1686   | 5866.9561  | 5904.7451   |           |
| 349.6621               | -15360.4262 | -1877.1656 | 0.0000      | 0.0000    |
| 8751.9516              | 7208.8917   | 326.4897   | -1543.0599  | 7282.8417 |
| 327.6936               | -21.5026    | 11.9673    | 664265.7895 | -8.5776   |
| -8.5784                |             |            |             |           |
| [29245]ENERGY: 7700000 | 3535.6534   | 5814.2715  | 5874.7656   |           |
| 376.1295               | -15349.8499 | -1840.9335 | 0.0000      | 0.0000    |
| 8804.3858              | 7214.4223   | 328.4457   | -1589.9634  | 7283.5967 |
| 327.7249               | 350.3178    | 201.7953   | 664265.7895 | -12.7536  |
| -12.7637               |             |            |             |           |
| [29295]ENERGY: 7710000 | 3621.4515   | 5956.6356  | 5848.1729   |           |
| 339.3037               | -15437.6068 | -1881.1363 | 0.0000      | 0.0000    |
| 8766.9595              | 7213.7801   | 327.0495   | -1553.1794  | 7283.1853 |
| 327.7539               | 100.8197    | 20.5018    | 664265.7895 | -8.1705   |
| -8.1472                |             |            |             |           |
| [29331]ENERGY: 7720000 | 3621.9120   | 5706.4128  | 5932.2142   |           |
| 335.5525               | -15339.7588 | -1855.6157 | 0.0000      | 0.0000    |
| 8814.5802              | 7215.2972   | 328.8260   | -1599.2830  | 7282.3849 |
| 327.7189               | 0.3933      | -33.5225   | 664265.7895 | -10.4103  |
| -10.4320               |             |            |             |           |
| [29381]ENERGY: 7730000 | 3581.1898   | 5758.2251  | 5896.8334   |           |
| 367.3868               | -15344.8336 | -1890.6347 | 0.0000      | 0.0000    |

## Supplementary Text 6

|                        |             |            |             |           |
|------------------------|-------------|------------|-------------|-----------|
| 8844.7743              | 7212.9412   | 329.9524   | -1631.8331  | 7284.1876 |
| 327.7036               | -115.7150   | -79.4409   | 664265.7895 | -10.3740  |
| -10.3592               |             |            |             |           |
| [29417]ENERGY: 7740000 | 3680.8046   | 5810.2354  | 5954.5268   |           |
| 356.6133               | -15402.3601 | -1893.5170 | 0.0000      | 0.0000    |
| 8706.2451              | 7212.5481   | 324.7846   | -1493.6970  | 7284.6214 |
| 327.7822               | -45.7690    | -37.7736   | 664265.7895 | -10.5603  |
| -10.5869               |             |            |             |           |
| [29467]ENERGY: 7750000 | 3618.2680   | 5777.2862  | 5915.3314   |           |
| 366.4058               | -15355.3262 | -1885.3084 | 0.0000      | 0.0000    |
| 8779.8304              | 7216.4872   | 327.5297   | -1563.3432  | 7284.6415 |
| 327.4267               | 31.6010     | 17.5935    | 664265.7895 | -5.8021   |
| -5.7787                |             |            |             |           |
| [29503]ENERGY: 7760000 | 3573.8803   | 5878.0577  | 5913.3241   |           |
| 374.8582               | -15405.3695 | -1914.6394 | 0.0000      | 0.0000    |
| 8793.6844              | 7213.7959   | 328.0465   | -1579.8885  | 7285.2931 |
| 327.6657               | 31.0922     | -14.6893   | 664265.7895 | -12.4158  |
| -12.4033               |             |            |             |           |
| [29553]ENERGY: 7770000 | 3548.5097   | 5800.9952  | 5864.7192   |           |
| 337.8805               | -15316.6887 | -1830.2643 | 0.0000      | 0.0000    |
| 8806.7341              | 7211.8857   | 328.5333   | -1594.8484  | 7285.8264 |
| 327.6730               | -20.4886    | -56.4846   | 664265.7895 | -8.2307   |
| -8.2404                |             |            |             |           |
| [29589]ENERGY: 7780000 | 3591.1891   | 5907.6004  | 5837.9176   |           |
| 357.6083               | -15422.0292 | -1838.1983 | 0.0000      | 0.0000    |
| 8780.1689              | 7214.2568   | 327.5423   | -1565.9121  | 7285.7778 |
| 327.5367               | -11.4257    | -31.2679   | 664265.7895 | -5.9912   |
| -6.0006                |             |            |             |           |
| [29639]ENERGY: 7790000 | 3528.6497   | 5842.8619  | 5870.8287   |           |
| 365.0649               | -15293.2246 | -1861.4062 | 0.0000      | 0.0000    |
| 8757.6854              | 7210.4598   | 326.7036   | -1547.2256  | 7285.1788 |
| 327.5726               | 92.1928     | 33.1615    | 664265.7895 | -11.7210  |
| -11.7173               |             |            |             |           |
| [29678]ENERGY: 7800000 | 3537.0179   | 5902.4532  | 5850.5378   |           |
| 365.4453               | -15399.8102 | -1813.5723 | 0.0000      | 0.0000    |
| 8772.2160              | 7214.2878   | 327.2456   | -1557.9282  | 7284.2632 |
| 327.7357               | 87.5329     | 29.4138    | 664265.7895 | -13.1187  |
| -13.1247               |             |            |             |           |
| [29728]ENERGY: 7810000 | 3603.6905   | 5872.9757  | 5872.9203   |           |
| 366.0520               | -15304.3860 | -1934.4275 | 0.0000      | 0.0000    |
| 8737.1226              | 7213.9476   | 325.9365   | -1523.1750  | 7285.7179 |
| 327.9588               | -71.7163    | -86.6514   | 664265.7895 | -10.1108  |
| -10.1041               |             |            |             |           |
| [29764]ENERGY: 7820000 | 3514.8118   | 5888.4301  | 5854.1269   |           |
| 347.7471               | -15365.3462 | -1871.1475 | 0.0000      | 0.0000    |
| 8843.4164              | 7212.0385   | 329.9017   | -1631.3779  | 7285.0381 |
| 327.8358               | 171.9164    | 145.2045   | 664265.7895 | -11.8778  |
| -11.8793               |             |            |             |           |
| [29814]ENERGY: 7830000 | 3514.2177   | 5837.8566  | 5960.3134   |           |
| 373.9062               | -15392.8979 | -1883.9161 | 0.0000      | 0.0000    |
| 8805.0993              | 7214.5791   | 328.4723   | -1590.5202  | 7286.5378 |
| 327.7677               | 26.2825     | 41.0694    | 664265.7895 | -7.9645   |
| -7.9644                |             |            |             |           |
| [29850]ENERGY: 7840000 | 3588.5907   | 5663.9069  | 5897.0549   |           |

## Supplementary Text 6

|                        |             |            |             |           |
|------------------------|-------------|------------|-------------|-----------|
| 354.9266               | -15323.6614 | -1792.2746 | 0.0000      | 0.0000    |
| 8830.1886              | 7218.7318   | 329.4083   | -1611.4569  | 7285.3800 |
| 327.6250               | 219.8547    | 62.2947    | 664265.7895 | -14.8522  |
| -14.8675               |             |            |             |           |
| [29900]ENERGY: 7850000 | 3626.2140   | 5903.4652  | 5907.0280   |           |
| 334.8769               | -15264.0787 | -1972.9850 | 0.0000      | 0.0000    |
| 8682.1825              | 7216.7028   | 323.8869   | -1465.4797  | 7285.8030 |
| 327.7111               | 22.5802     | -80.4732   | 664265.7895 | -10.5914  |
| -10.5789               |             |            |             |           |
| [29936]ENERGY: 7860000 | 3567.7166   | 5869.8340  | 5853.2796   |           |
| 344.4737               | -15390.9128 | -1827.3556 | 0.0000      | 0.0000    |
| 8799.7211              | 7216.7567   | 328.2717   | -1582.9644  | 7285.8202 |
| 327.9342               | 47.3737     | 73.4024    | 664265.7895 | -11.3392  |
| -11.3577               |             |            |             |           |
| [29986]ENERGY: 7870000 | 3565.3564   | 5836.9378  | 5944.5214   |           |
| 381.0583               | -15428.6959 | -1958.1608 | 0.0000      | 0.0000    |
| 8872.6314              | 7213.6486   | 330.9916   | -1658.9829  | 7285.5400 |
| 327.8767               | 45.1137     | -31.9469   | 664265.7895 | -9.6298   |
| -9.6173                |             |            |             |           |
| [30022]ENERGY: 7880000 | 3572.9718   | 5874.5374  | 5924.5111   |           |
| 368.9329               | -15423.4991 | -1845.0775 | 0.0000      | 0.0000    |
| 8743.7736              | 7216.1501   | 326.1846   | -1527.6235  | 7286.8643 |
| 327.8206               | -153.7273   | -125.6270  | 664265.7895 | -13.2235  |
| -13.2149               |             |            |             |           |
| [30072]ENERGY: 7890000 | 3639.5631   | 5878.1105  | 5890.4868   |           |
| 355.7126               | -15451.2601 | -1872.4071 | 0.0000      | 0.0000    |
| 8779.2690              | 7219.4746   | 327.5087   | -1559.7944  | 7286.9156 |
| 327.8770               | 123.9764    | 28.9607    | 664265.7895 | -11.7773  |
| -11.7954               |             |            |             |           |
| [30111]ENERGY: 7900000 | 3576.6543   | 5875.7188  | 5907.6441   |           |
| 370.2701               | -15370.9932 | -1884.7400 | 0.0000      | 0.0000    |
| 8739.8715              | 7214.4257   | 326.0390   | -1525.4458  | 7286.8349 |
| 327.7340               | 135.7760    | 54.3195    | 664265.7895 | -13.9194  |
| -13.8999               |             |            |             |           |
| [30161]ENERGY: 7910000 | 3621.6387   | 5749.3113  | 5928.1012   |           |
| 349.0264               | -15377.7489 | -1875.9256 | 0.0000      | 0.0000    |
| 8822.6448              | 7217.0479   | 329.1269   | -1605.5969  | 7287.8448 |
| 327.6102               | -49.3696    | 9.4976     | 664265.7895 | -15.5308  |
| -15.5268               |             |            |             |           |
| [30197]ENERGY: 7920000 | 3611.2645   | 5786.3555  | 5932.3788   |           |
| 362.9740               | -15403.9201 | -1873.4409 | 0.0000      | 0.0000    |
| 8800.4542              | 7216.0661   | 328.2990   | -1584.3881  | 7287.5250 |
| 327.8268               | -102.9874   | -56.0012   | 664265.7895 | -16.1995  |
| -16.2054               |             |            |             |           |
| [30247]ENERGY: 7930000 | 3609.0628   | 5824.3572  | 5915.3530   |           |
| 380.2282               | -15399.7317 | -1822.7330 | 0.0000      | 0.0000    |
| 8715.4704              | 7222.0068   | 325.1287   | -1493.4636  | 7287.7854 |
| 327.9199               | 88.4644     | 71.7535    | 664265.7895 | -13.3957  |
| -13.4050               |             |            |             |           |
| [30283]ENERGY: 7940000 | 3550.6904   | 5856.2304  | 5907.9152   |           |
| 338.1280               | -15451.2335 | -1862.4214 | 0.0000      | 0.0000    |
| 8873.6256              | 7212.9347   | 331.0287   | -1660.6909  | 7287.0757 |
| 327.7155               | 48.5390     | 67.5737    | 664265.7895 | -10.0756  |
| -10.0682               |             |            |             |           |

## Supplementary Text 6

|                        |             |            |             |           |
|------------------------|-------------|------------|-------------|-----------|
| [30333]ENERGY: 7950000 | 3583.9614   | 5908.3559  | 5920.0511   |           |
| 349.0915               | -15446.9131 | -1901.1012 | 0.0000      | 0.0000    |
| 8804.1212              | 7217.5668   | 328.4358   | -1586.5545  | 7287.5067 |
| 327.6216               | -23.0856    | -52.5301   | 664265.7895 | -10.1736  |
| -10.1594               |             |            |             |           |
| [30369]ENERGY: 7960000 | 3579.6736   | 5869.8835  | 5936.0578   |           |
| 339.0674               | -15326.2843 | -1892.4593 | 0.0000      | 0.0000    |
| 8708.6033              | 7214.5419   | 324.8726   | -1494.0614  | 7286.8321 |
| 327.7293               | -82.7354    | -8.1776    | 664265.7895 | -14.5878  |
| -14.5884               |             |            |             |           |
| [30419]ENERGY: 7970000 | 3629.3900   | 5910.3327  | 5919.8590   |           |
| 363.2847               | -15451.0131 | -1885.6619 | 0.0000      | 0.0000    |
| 8728.4792              | 7214.6706   | 325.6140   | -1513.8086  | 7287.1199 |
| 327.5613               | -120.2859   | -135.9064  | 664265.7895 | -11.9540  |
| -11.9827               |             |            |             |           |
| [30455]ENERGY: 7980000 | 3600.8922   | 5825.9355  | 5885.6171   |           |
| 336.5183               | -15458.1982 | -1845.8494 | 0.0000      | 0.0000    |
| 8871.9880              | 7216.9034   | 330.9676   | -1655.0846  | 7286.4832 |
| 327.7052               | 60.5013     | 21.4036    | 664265.7895 | -10.1203  |
| -10.1062               |             |            |             |           |
| [30505]ENERGY: 7990000 | 3641.2136   | 5796.6314  | 5910.8562   |           |
| 385.5789               | -15385.4957 | -1893.8409 | 0.0000      | 0.0000    |
| 8762.2771              | 7217.2207   | 326.8749   | -1545.0564  | 7288.4306 |
| 327.6082               | -198.6256   | -231.9724  | 664265.7895 | -13.5117  |
| -13.5127               |             |            |             |           |
| [30544]ENERGY: 8000000 | 3548.2834   | 5811.6266  | 5906.7873   |           |
| 380.7556               | -15344.6134 | -1896.8298 | 0.0000      | 0.0000    |
| 8812.7200              | 7218.7297   | 328.7566   | -1593.9903  | 7289.1066 |
| 327.7864               | 51.9051     | 34.5002    | 664265.7895 | -3.4598   |
| -3.4565                |             |            |             |           |
| [30594]ENERGY: 8010000 | 3582.5707   | 5829.2576  | 5929.7686   |           |
| 353.4891               | -15340.8607 | -1836.4209 | 0.0000      | 0.0000    |
| 8704.8862              | 7222.6906   | 324.7339   | -1482.1956  | 7288.9030 |
| 327.8553               | 147.3849    | 85.1579    | 664265.7895 | -9.3003   |
| -9.3014                |             |            |             |           |
| [30630]ENERGY: 8020000 | 3563.1926   | 5766.9617  | 5852.1519   |           |
| 355.8948               | -15381.8271 | -1823.9312 | 0.0000      | 0.0000    |
| 8887.1233              | 7219.5661   | 331.5322   | -1667.5572  | 7289.6407 |
| 328.0088               | 47.9718     | 40.6999    | 664265.7895 | -7.8808   |
| -7.8825                |             |            |             |           |
| [30680]ENERGY: 8030000 | 3564.4537   | 5881.2653  | 5945.0785   |           |
| 350.6197               | -15428.6006 | -1862.1371 | 0.0000      | 0.0000    |
| 8769.4884              | 7220.1680   | 327.1439   | -1549.3204  | 7290.5285 |
| 328.1066               | 41.2620     | 19.1249    | 664265.7895 | -10.7498  |
| -10.7450               |             |            |             |           |
| [30716]ENERGY: 8040000 | 3627.0350   | 5803.8444  | 5946.2587   |           |
| 370.0879               | -15411.5994 | -1893.7888 | 0.0000      | 0.0000    |
| 8778.1605              | 7219.9983   | 327.4674   | -1558.1622  | 7290.0891 |
| 328.2555               | 23.7747     | -66.0187   | 664265.7895 | -9.4968   |
| -9.5161                |             |            |             |           |
| [30766]ENERGY: 8050000 | 3612.5453   | 5841.2863  | 5883.8751   |           |
| 329.0901               | -15407.5723 | -1865.3707 | 0.0000      | 0.0000    |
| 8826.1186              | 7219.9725   | 329.2565   | -1606.1461  | 7291.4339 |
| 327.9979               | 8.5375      | -47.1953   | 664265.7895 | -10.6899  |

Supplementary Text 6

-10.6828  
 [30802]ENERGY: 8060000 3553.8929 5921.9287 5831.1254  
 355.1137 -15382.8866 -1862.8449 0.0000 0.0000  
 8809.0346 7225.3638 328.6191 -1583.6708 7292.8749  
 327.9695 113.4335 76.6886 664265.7895 -9.7591  
 -9.7465  
 [30852]ENERGY: 8070000 3571.2055 5860.1852 5853.8911  
 370.3921 -15401.4553 -1852.4802 0.0000 0.0000  
 8820.1298 7221.8681 329.0330 -1598.2617 7294.0731  
 328.1193 211.9102 162.4915 664265.7895 -10.9275  
 -10.9319  
 [30888]ENERGY: 8080000 3672.0309 5887.1490 5860.3598  
 358.2664 -15397.6451 -1866.3845 0.0000 0.0000  
 8710.5000 7224.2765 324.9433 -1486.2235 7293.9186  
 328.0945 -143.4696 -175.9964 664265.7895 -9.1279  
 -9.1304  
 [30938]ENERGY: 8090000 3636.0595 5868.1732 5888.2609  
 346.1788 -15419.5599 -1938.9227 0.0000 0.0000  
 8844.5087 7224.6985 329.9425 -1619.8102 7294.7724  
 328.1045 -27.4855 -75.6548 664265.7895 -11.4237  
 -11.4233  
 [30977]ENERGY: 8100000 3551.3100 5822.4334 5840.5075  
 363.3074 -15358.3711 -1930.2691 0.0000 0.0000  
 8932.1622 7221.0803 333.2124 -1711.0819 7295.5794  
 328.3184 83.0088 -48.7486 664265.7895 -8.7178  
 -8.7215  
 [31027]ENERGY: 8110000 3660.5515 5769.2549 5912.8443  
 363.9380 -15412.8322 -1911.2774 0.0000 0.0000  
 8842.2343 7224.7135 329.8576 -1617.5208 7295.5780  
 328.2562 -14.5294 -50.8967 664265.7895 -14.1453  
 -14.1445  
 [31063]ENERGY: 8120000 3597.8286 5886.6427 5916.0296  
 357.6340 -15410.8409 -1898.5753 0.0000 0.0000  
 8775.8531 7224.5719 327.3813 -1551.2812 7295.2245  
 328.4325 171.1688 95.4318 664265.7895 -5.0140  
 -5.0026  
 [31113]ENERGY: 8130000 3613.6393 5923.6919 5955.7693  
 379.2256 -15503.6735 -1862.5330 0.0000 0.0000  
 8718.6813 7224.8011 325.2485 -1493.8803 7295.6734  
 328.2125 66.2283 -46.8902 664265.7895 -10.6346  
 -10.6514  
 [31149]ENERGY: 8140000 3579.1676 5854.7789 5872.8779  
 337.9966 -15305.3374 -1935.5531 0.0000 0.0000  
 8820.6248 7224.5553 329.0515 -1596.0695 7296.2962  
 328.1459 10.8451 -14.9073 664265.7895 -6.9636  
 -6.9533  
 [31199]ENERGY: 8150000 3706.6565 5751.1740 6014.3177  
 364.1036 -15340.1377 -1960.6633 0.0000 0.0000  
 8694.5804 7230.0311 324.3494 -1464.5493 7296.2732  
 328.2324 -191.9093 -114.1487 664265.7895 -10.0517  
 -10.0504  
 [31235]ENERGY: 8160000 3501.8120 5839.5442 5925.6375  
 376.4965 -15381.5493 -1876.9040 0.0000 0.0000  
 8840.8567 7225.8937 329.8063 -1614.9630 7296.0335

Supplementary Text 6

|                        |             |            |             |           |
|------------------------|-------------|------------|-------------|-----------|
| 328.0641               | 125.9490    | 40.0344    | 664265.7895 | -8.8673   |
| -8.8622                |             |            |             |           |
| [31285]ENERGY: 8170000 | 3657.6095   | 5884.4253  | 5912.0140   |           |
| 338.9949               | -15373.9827 | -1836.6217 | 0.0000      | 0.0000    |
| 8647.4393              | 7229.8786   | 322.5909   | -1417.5606  | 7296.3391 |
| 328.3826               | -59.7231    | -40.2727   | 664265.7895 | -8.0633   |
| -8.0731                |             |            |             |           |
| [31321]ENERGY: 8180000 | 3572.4835   | 5803.1223  | 5914.5056   |           |
| 384.1521               | -15369.1437 | -1845.9325 | 0.0000      | 0.0000    |
| 8767.3730              | 7226.5603   | 327.0650   | -1540.8127  | 7295.4349 |
| 328.2089               | 126.5255    | 72.4570    | 664265.7895 | -7.0490   |
| -7.0266                |             |            |             |           |
| [31371]ENERGY: 8190000 | 3649.1763   | 5842.8002  | 5869.6743   |           |
| 378.7561               | -15428.8740 | -1794.0506 | 0.0000      | 0.0000    |
| 8709.7113              | 7227.1938   | 324.9139   | -1482.5175  | 7296.3026 |
| 328.1062               | -61.1716    | -55.5430   | 664265.7895 | -9.3323   |
| -9.3466                |             |            |             |           |
| [31410]ENERGY: 8200000 | 3707.8046   | 5809.1251  | 5845.1311   |           |
| 359.9675               | -15409.3028 | -1882.1198 | 0.0000      | 0.0000    |
| 8796.0360              | 7226.6417   | 328.1342   | -1569.3943  | 7295.5972 |
| 328.1223               | -10.0062    | -47.4248   | 664265.7895 | -9.2920   |
| -9.2829                |             |            |             |           |
| [31460]ENERGY: 8210000 | 3627.3767   | 5780.0452  | 5867.2140   |           |
| 355.9569               | -15316.4652 | -1886.0183 | 0.0000      | 0.0000    |
| 8799.9019              | 7228.0112   | 328.2784   | -1571.8906  | 7297.3273 |
| 328.2232               | -17.2308    | -63.7546   | 664265.7895 | -6.7697   |
| -6.7891                |             |            |             |           |
| [31496]ENERGY: 8220000 | 3619.8675   | 5840.7223  | 5881.7959   |           |
| 363.3179               | -15380.2522 | -1837.9327 | 0.0000      | 0.0000    |
| 8736.2071              | 7223.7258   | 325.9023   | -1512.4813  | 7296.9405 |
| 328.1216               | -6.4969     | -38.4922   | 664265.7895 | -10.6222  |
| -10.6290               |             |            |             |           |
| [31546]ENERGY: 8230000 | 3583.4141   | 5996.6852  | 5879.8378   |           |
| 341.7708               | -15488.0712 | -1807.4642 | 0.0000      | 0.0000    |
| 8718.5426              | 7224.7152   | 325.2434   | -1493.8274  | 7296.1356 |
| 327.9834               | -20.6346    | 7.6139     | 664265.7895 | -9.4374   |
| -9.4237                |             |            |             |           |
| [31582]ENERGY: 8240000 | 3528.8623   | 5725.9656  | 5955.1205   |           |
| 351.0090               | -15358.7970 | -1800.9008 | 0.0000      | 0.0000    |
| 8823.1016              | 7224.3611   | 329.1439   | -1598.7405  | 7297.6649 |
| 328.0211               | 15.8356     | 62.3029    | 664265.7895 | -8.9289   |
| -8.9285                |             |            |             |           |
| [31632]ENERGY: 8250000 | 3668.2044   | 5747.0000  | 5902.4615   |           |
| 337.5755               | -15384.2603 | -1820.2219 | 0.0000      | 0.0000    |
| 8776.2595              | 7227.0188   | 327.3965   | -1549.2408  | 7298.8247 |
| 328.0838               | 25.6018     | -4.9612    | 664265.7895 | -13.8190  |
| -13.8266               |             |            |             |           |
| [31668]ENERGY: 8260000 | 3557.3629   | 5781.5364  | 5937.2585   |           |
| 363.6181               | -15360.4398 | -1802.1846 | 0.0000      | 0.0000    |
| 8749.1914              | 7226.3429   | 326.3867   | -1522.8485  | 7298.6040 |
| 328.0864               | 187.6676    | 174.5557   | 664265.7895 | -10.7192  |
| -10.7187               |             |            |             |           |
| [31718]ENERGY: 8270000 | 3635.4149   | 5781.2613  | 5909.2745   |           |
| 344.5212               | -15367.0657 | -1851.2754 | 0.0000      | 0.0000    |

## Supplementary Text 6

|                        |             |            |             |           |
|------------------------|-------------|------------|-------------|-----------|
| 8775.8777              | 7228.0086   | 327.3822   | -1547.8691  | 7299.0565 |
| 328.0882               | 119.1968    | 26.0043    | 664265.7895 | -9.2128   |
| -9.2155                |             |            |             |           |
| [31754]ENERGY: 8280000 | 3654.0108   | 5776.4103  | 6006.0660   |           |
| 370.1630               | -15403.2626 | -1894.3152 | 0.0000      | 0.0000    |
| 8721.9074              | 7230.9798   | 325.3689   | -1490.9276  | 7300.3517 |
| 328.0258               | -97.9295    | -23.3257   | 664265.7895 | -8.4211   |
| -8.4038                |             |            |             |           |
| [31804]ENERGY: 8290000 | 3586.1199   | 5818.7656  | 5898.8502   |           |
| 381.9584               | -15420.8093 | -1864.5363 | 0.0000      | 0.0000    |
| 8827.8460              | 7228.1944   | 329.3209   | -1599.6516  | 7300.4934 |
| 328.1713               | 51.3966     | 59.4902    | 664265.7895 | -11.6838  |
| -11.6924               |             |            |             |           |
| [31843]ENERGY: 8300000 | 3532.3505   | 5881.2664  | 5945.9341   |           |
| 357.9694               | -15435.1722 | -1839.4113 | 0.0000      | 0.0000    |
| 8788.1793              | 7231.1162   | 327.8411   | -1557.0631  | 7300.7650 |
| 328.2852               | 125.6401    | 100.5897   | 664265.7895 | -9.3552   |
| -9.3680                |             |            |             |           |
| [31893]ENERGY: 8310000 | 3628.0186   | 5792.3364  | 5909.8665   |           |
| 351.6794               | -15414.9796 | -1911.9872 | 0.0000      | 0.0000    |
| 8870.5167              | 7225.4509   | 330.9127   | -1645.0658  | 7300.4510 |
| 328.2783               | -69.3872    | -84.0158   | 664265.7895 | -10.6545  |
| -10.6449               |             |            |             |           |
| [31929]ENERGY: 8320000 | 3518.5233   | 5779.5570  | 5909.0543   |           |
| 384.4691               | -15328.9046 | -1891.0682 | 0.0000      | 0.0000    |
| 8859.9291              | 7231.5599   | 330.5177   | -1628.3691  | 7302.2584 |
| 328.3817               | -11.6280    | -59.8589   | 664265.7895 | -12.7260  |
| -12.7378               |             |            |             |           |
| [31979]ENERGY: 8330000 | 3590.1955   | 5887.0914  | 5934.0608   |           |
| 336.1069               | -15412.2151 | -1973.0631 | 0.0000      | 0.0000    |
| 8863.9924              | 7226.1689   | 330.6693   | -1637.8235  | 7302.3786 |
| 328.1566               | 100.9272    | -2.6811    | 664265.7895 | -14.7067  |
| -14.6851               |             |            |             |           |
| [32015]ENERGY: 8340000 | 3580.3642   | 5775.5220  | 5928.0234   |           |
| 362.4929               | -15457.4662 | -1880.1741 | 0.0000      | 0.0000    |
| 8924.5700              | 7233.3323   | 332.9292   | -1691.2377  | 7302.4577 |
| 328.1792               | -94.8584    | -113.9387  | 664265.7895 | -11.1841  |
| -11.1885               |             |            |             |           |
| [32065]ENERGY: 8350000 | 3611.0711   | 5873.0854  | 5886.9322   |           |
| 313.6304               | -15427.0893 | -1853.5045 | 0.0000      | 0.0000    |
| 8826.4784              | 7230.6037   | 329.2699   | -1595.8746  | 7304.2239 |
| 328.1566               | 39.0157     | -45.2401   | 664265.7895 | -14.8197  |
| -14.8230               |             |            |             |           |
| [32101]ENERGY: 8360000 | 3579.9561   | 5861.1114  | 5869.8872   |           |
| 330.5375               | -15500.2348 | -1756.7826 | 0.0000      | 0.0000    |
| 8849.3147              | 7233.7896   | 330.1218   | -1615.5251  | 7303.5598 |
| 328.2271               | -80.7201    | -91.6333   | 664265.7895 | -6.4155   |
| -6.4099                |             |            |             |           |
| [32151]ENERGY: 8370000 | 3588.5921   | 5947.8084  | 5845.4310   |           |
| 368.7501               | -15438.3092 | -1894.6959 | 0.0000      | 0.0000    |
| 8814.8369              | 7232.4134   | 328.8356   | -1582.4236  | 7304.3442 |
| 328.2216               | -165.5083   | -72.2827   | 664265.7895 | -11.8745  |
| -11.8775               |             |            |             |           |
| [32187]ENERGY: 8380000 | 3516.8618   | 5867.6713  | 5862.4788   |           |

## Supplementary Text 6

|                        |             |            |             |           |
|------------------------|-------------|------------|-------------|-----------|
| 369.8694               | -15390.2821 | -1761.1942 | 0.0000      | 0.0000    |
| 8769.3576              | 7234.7626   | 327.1390   | -1534.5950  | 7305.2765 |
| 328.3118               | 136.0811    | 212.1393   | 664265.7895 | -9.4145   |
| -9.4129                |             |            |             |           |
| [32237]ENERGY: 8390000 | 3614.0572   | 5852.9686  | 5888.0715   |           |
| 355.8811               | -15459.4207 | -1872.7544 | 0.0000      | 0.0000    |
| 8852.2716              | 7231.0749   | 330.2321   | -1621.1967  | 7305.3180 |
| 328.2176               | 49.9706     | 78.9687    | 664265.7895 | -12.8705  |
| -12.8654               |             |            |             |           |
| [32276]ENERGY: 8400000 | 3556.5551   | 5851.3795  | 5987.8061   |           |
| 338.0276               | -15488.7069 | -1812.0590 | 0.0000      | 0.0000    |
| 8798.8258              | 7231.8283   | 328.2383   | -1566.9975  | 7304.8911 |
| 328.5595               | 20.2896     | 50.7349    | 664265.7895 | -10.1122  |
| -10.1034               |             |            |             |           |
| [32326]ENERGY: 8410000 | 3524.8118   | 5808.6439  | 5835.9162   |           |
| 375.7066               | -15352.8441 | -1762.1271 | 0.0000      | 0.0000    |
| 8806.8723              | 7236.9796   | 328.5385   | -1569.8927  | 7306.7915 |
| 328.3632               | 142.6830    | 62.4929    | 664265.7895 | -10.5463  |
| -10.5564               |             |            |             |           |
| [32362]ENERGY: 8420000 | 3644.0369   | 5822.9931  | 5882.6058   |           |
| 384.9172               | -15421.3644 | -1843.1966 | 0.0000      | 0.0000    |
| 8763.7451              | 7233.7372   | 326.9296   | -1530.0079  | 7305.4539 |
| 328.2630               | -88.5082    | -49.8369   | 664265.7895 | -15.0314  |
| -15.0446               |             |            |             |           |
| [32412]ENERGY: 8430000 | 3592.2607   | 5817.9972  | 5922.3754   |           |
| 325.1819               | -15430.4259 | -1830.8125 | 0.0000      | 0.0000    |
| 8837.6103              | 7234.1871   | 329.6851   | -1603.4232  | 7306.1926 |
| 328.2706               | -136.0712   | -59.6747   | 664265.7895 | -14.7235  |
| -14.7076               |             |            |             |           |
| [32448]ENERGY: 8440000 | 3628.6391   | 5945.9216  | 5889.7797   |           |
| 384.3397               | -15443.6509 | -1856.5376 | 0.0000      | 0.0000    |
| 8687.2006              | 7235.6922   | 324.0741   | -1451.5083  | 7306.2038 |
| 328.2111               | 105.0396    | -14.3744   | 664265.7895 | -14.9748  |
| -14.9824               |             |            |             |           |
| [32498]ENERGY: 8450000 | 3597.2022   | 5814.0931  | 5848.1430   |           |
| 346.2539               | -15359.8751 | -1793.1790 | 0.0000      | 0.0000    |
| 8786.4710              | 7239.1092   | 327.7774   | -1547.3618  | 7306.8534 |
| 328.0094               | 156.2132    | 90.3381    | 664265.7895 | -16.7854  |
| -16.7799               |             |            |             |           |
| [32534]ENERGY: 8460000 | 3638.6954   | 5878.5435  | 5952.3149   |           |
| 348.5154               | -15440.0021 | -1777.9774 | 0.0000      | 0.0000    |
| 8642.3455              | 7242.4351   | 322.4008   | -1399.9103  | 7306.6746 |
| 328.2902               | 32.2804     | 1.9578     | 664265.7895 | -12.1929  |
| -12.1966               |             |            |             |           |
| [32584]ENERGY: 8470000 | 3572.9972   | 5884.4171  | 5943.1740   |           |
| 360.2224               | -15321.0822 | -1938.7285 | 0.0000      | 0.0000    |
| 8735.2723              | 7236.2723   | 325.8674   | -1499.0000  | 7307.3943 |
| 328.0200               | -29.5354    | 23.1443    | 664265.7895 | -9.8820   |
| -9.8716                |             |            |             |           |
| [32620]ENERGY: 8480000 | 3675.8198   | 5864.9940  | 5921.3001   |           |
| 344.5524               | -15452.3830 | -1852.1485 | 0.0000      | 0.0000    |
| 8735.8995              | 7238.0344   | 325.8909   | -1497.8651  | 7306.5999 |
| 328.1119               | -95.3509    | -36.8142   | 664265.7895 | -16.4264  |
| -16.4466               |             |            |             |           |



## Supplementary Text 6

|                        |             |            |             |           |
|------------------------|-------------|------------|-------------|-----------|
| [32670]ENERGY: 8490000 | 3626.1493   | 5897.7315  | 5910.0385   |           |
| 370.1265               | -15403.6674 | -1891.7663 | 0.0000      | 0.0000    |
| 8729.7681              | 7238.3803   | 325.6621   | -1491.3878  | 7307.4285 |
| 328.1214               | 21.0335     | -81.8061   | 664265.7895 | -11.6635  |
| -11.6532               |             |            |             |           |
| [32709]ENERGY: 8500000 | 3666.5824   | 5879.3110  | 5851.0685   |           |
| 367.8853               | -15346.2847 | -1947.1747 | 0.0000      | 0.0000    |
| 8765.7126              | 7237.1004   | 327.0030   | -1528.6122  | 7308.2822 |
| 328.1197               | -84.5318    | -154.9884  | 664265.7895 | -10.4878  |
| -10.5116               |             |            |             |           |
| [32759]ENERGY: 8510000 | 3616.2314   | 5881.1221  | 5855.0438   |           |
| 361.1680               | -15397.3052 | -1847.6233 | 0.0000      | 0.0000    |
| 8769.3140              | 7237.9509   | 327.1374   | -1531.3631  | 7308.9240 |
| 328.0802               | 135.5994    | 12.6984    | 664265.7895 | -14.3835  |
| -14.3694               |             |            |             |           |
| [32795]ENERGY: 8520000 | 3697.0938   | 5833.5675  | 5890.9451   |           |
| 340.7712               | -15359.8974 | -1840.7378 | 0.0000      | 0.0000    |
| 8680.2311              | 7241.9734   | 323.8142   | -1438.2577  | 7309.6278 |
| 327.9994               | -8.4410     | -91.2142   | 664265.7895 | -12.2137  |
| -12.2060               |             |            |             |           |
| [32845]ENERGY: 8530000 | 3658.5439   | 5891.6283  | 5855.9416   |           |
| 361.9614               | -15379.2966 | -1851.1041 | 0.0000      | 0.0000    |
| 8704.8201              | 7242.4945   | 324.7314   | -1462.3256  | 7310.4197 |
| 328.0323               | 67.2480     | 20.9661    | 664265.7895 | -11.0912  |
| -11.0986               |             |            |             |           |
| [32881]ENERGY: 8540000 | 3656.4940   | 5832.9596  | 5868.6311   |           |
| 347.9531               | -15458.7216 | -1823.6726 | 0.0000      | 0.0000    |
| 8817.0036              | 7240.6471   | 328.9164   | -1576.3565  | 7309.2871 |
| 328.3363               | -104.8184   | -41.3922   | 664265.7895 | -9.4600   |
| -9.4590                |             |            |             |           |
| [32931]ENERGY: 8550000 | 3603.1622   | 5804.3758  | 5892.9054   |           |
| 383.1746               | -15338.2032 | -1847.4244 | 0.0000      | 0.0000    |
| 8744.0742              | 7242.0647   | 326.1958   | -1502.0095  | 7310.7255 |
| 328.0609               | 178.4179    | 160.1831   | 664265.7895 | -8.3884   |
| -8.3716                |             |            |             |           |
| [32967]ENERGY: 8560000 | 3592.4087   | 5775.9893  | 5866.3149   |           |
| 390.2804               | -15408.9602 | -1837.8030 | 0.0000      | 0.0000    |
| 8863.4789              | 7241.7090   | 330.6502   | -1621.7699  | 7311.3000 |
| 328.0274               | -1.8521     | -25.0044   | 664265.7895 | -7.7187   |
| -7.7320                |             |            |             |           |
| [33017]ENERGY: 8570000 | 3572.6812   | 5753.9287  | 5917.0201   |           |
| 343.9448               | -15322.3458 | -1801.0011 | 0.0000      | 0.0000    |
| 8778.2956              | 7242.5234   | 327.4724   | -1535.7722  | 7311.4700 |
| 328.1117               | -36.1359    | -114.4222  | 664265.7895 | -12.3539  |
| -12.3547               |             |            |             |           |
| [33053]ENERGY: 8580000 | 3568.4762   | 5782.5069  | 5901.1402   |           |
| 370.1879               | -15375.4922 | -1870.6375 | 0.0000      | 0.0000    |
| 8863.8559              | 7240.0373   | 330.6642   | -1623.8185  | 7312.5883 |
| 328.0751               | 62.2266     | 24.4008    | 664265.7895 | -14.3396  |
| -14.3231               |             |            |             |           |
| [33103]ENERGY: 8590000 | 3577.3134   | 5966.4082  | 5885.5040   |           |
| 350.6672               | -15313.7576 | -1981.0328 | 0.0000      | 0.0000    |
| 8755.3520              | 7240.4544   | 326.6165   | -1514.8976  | 7312.8701 |
| 328.0639               | 8.1533      | -68.5466   | 664265.7895 | -15.3763  |

Supplementary Text 6

-15.4013

|                |             |            |             |           |
|----------------|-------------|------------|-------------|-----------|
| [33142]ENERGY: | 8600000     | 3620.4362  | 5773.4830   | 5902.1923 |
| 351.4837       | -15318.8084 | -1866.8646 | 0.0000      | 0.0000    |
| 8781.1589      | 7243.0810   | 327.5792   | -1538.0779  | 7312.8154 |
| 327.9928       | 13.1161     | 23.2209    | 664265.7895 | -9.5625   |

-9.5572

|                |             |            |             |           |
|----------------|-------------|------------|-------------|-----------|
| [33192]ENERGY: | 8610000     | 3723.4392  | 5731.9476   | 5944.7396 |
| 368.2780       | -15505.1130 | -1854.3280 | 0.0000      | 0.0000    |
| 8832.1399      | 7241.1033   | 329.4811   | -1591.0366  | 7311.2707 |
| 328.2192       | -47.2875    | -69.4363   | 664265.7895 | -10.2843  |

-10.2713

|                |             |            |             |           |
|----------------|-------------|------------|-------------|-----------|
| [33228]ENERGY: | 8620000     | 3555.2280  | 5762.5090   | 5898.5502 |
| 371.6085       | -15378.9762 | -1846.2464 | 0.0000      | 0.0000    |
| 8876.9188      | 7239.5920   | 331.1515   | -1637.3269  | 7311.5999 |
| 328.4898       | -23.2059    | -37.0622   | 664265.7895 | -14.1104  |

-14.1281

|                |             |            |             |           |
|----------------|-------------|------------|-------------|-----------|
| [33278]ENERGY: | 8630000     | 3556.1324  | 5822.3049   | 5882.4026 |
| 363.8890       | -15316.0335 | -1883.3298 | 0.0000      | 0.0000    |
| 8816.7267      | 7242.0923   | 328.9061   | -1574.6344  | 7312.8301 |
| 328.2651       | -204.2409   | -113.6710  | 664265.7895 | -9.8960   |

-9.8611

|                |             |            |             |           |
|----------------|-------------|------------|-------------|-----------|
| [33314]ENERGY: | 8640000     | 3569.7415  | 5862.5473   | 5910.5242 |
| 360.7094       | -15360.3113 | -1881.5115 | 0.0000      | 0.0000    |
| 8782.1339      | 7243.8335   | 327.6156   | -1538.3003  | 7312.1834 |
| 328.2054       | 114.4907    | 77.7588    | 664265.7895 | -12.0036  |

-12.0312

|                |             |            |             |           |
|----------------|-------------|------------|-------------|-----------|
| [33364]ENERGY: | 8650000     | 3538.5380  | 5857.7516   | 5929.7230 |
| 369.9574       | -15503.0477 | -1773.1740 | 0.0000      | 0.0000    |
| 8824.2939      | 7244.0422   | 329.1884   | -1580.2517  | 7313.2044 |
| 328.3030       | 29.7227     | 38.2791    | 664265.7895 | -10.4079  |

-10.4180

|                |             |            |             |           |
|----------------|-------------|------------|-------------|-----------|
| [33400]ENERGY: | 8660000     | 3554.6787  | 5755.6532   | 5907.8877 |
| 334.2268       | -15321.3223 | -1792.9426 | 0.0000      | 0.0000    |
| 8802.6675      | 7240.8490   | 328.3816   | -1561.8185  | 7311.4026 |
| 328.1226       | 5.9274      | -1.0804    | 664265.7895 | -11.3977  |

-11.3897

|                |             |            |             |           |
|----------------|-------------|------------|-------------|-----------|
| [33450]ENERGY: | 8670000     | 3633.1779  | 5826.3660   | 5940.6544 |
| 353.4353       | -15330.4376 | -1900.2730 | 0.0000      | 0.0000    |
| 8725.9676      | 7248.8906   | 325.5203   | -1477.0770  | 7314.4976 |
| 328.3562       | 15.9914     | -56.6795   | 664265.7895 | -9.9292   |

-9.9086

|                |             |            |             |           |
|----------------|-------------|------------|-------------|-----------|
| [33486]ENERGY: | 8680000     | 3538.7365  | 5780.3618   | 5893.0940 |
| 362.3837       | -15224.9082 | -1877.3310 | 0.0000      | 0.0000    |
| 8772.5340      | 7244.8708   | 327.2575   | -1527.6632  | 7316.2014 |
| 328.1447       | 139.9868    | 50.4172    | 664265.7895 | -7.1747   |

-7.1879

|                |             |            |             |           |
|----------------|-------------|------------|-------------|-----------|
| [33536]ENERGY: | 8690000     | 3574.0078  | 5801.0426   | 5937.1239 |
| 388.6076       | -15345.1541 | -1935.6570 | 0.0000      | 0.0000    |
| 8825.0891      | 7245.0599   | 329.2180   | -1580.0292  | 7315.4728 |
| 328.2855       | -14.7095    | -25.4917   | 664265.7895 | -9.5504   |

-9.5681

|                |             |            |            |           |
|----------------|-------------|------------|------------|-----------|
| [33575]ENERGY: | 8700000     | 3616.9086  | 5743.9638  | 5965.6697 |
| 368.0460       | -15372.7026 | -1864.7019 | 0.0000     | 0.0000    |
| 8784.6028      | 7241.7865   | 327.7077   | -1542.8163 | 7315.3088 |

Supplementary Text 6

|                        |             |            |             |           |
|------------------------|-------------|------------|-------------|-----------|
| 328.4113               | -226.3811   | -204.5154  | 664265.7895 | -7.2508   |
| -7.2450                |             |            |             |           |
| [33625]ENERGY: 8710000 | 3616.0479   | 5734.6472  | 5939.6565   |           |
| 377.1139               | -15391.3873 | -1857.8641 | 0.0000      | 0.0000    |
| 8827.5198              | 7245.7340   | 329.3087   | -1581.7858  | 7315.4858 |
| 328.1996               | 50.4483     | -54.0839   | 664265.7895 | -11.5576  |
| -11.5528               |             |            |             |           |
| [33661]ENERGY: 8720000 | 3659.4737   | 5865.2970  | 5912.2196   |           |
| 343.3784               | -15424.2429 | -1850.5258 | 0.0000      | 0.0000    |
| 8743.9886              | 7249.5887   | 326.1926   | -1494.3999  | 7314.6042 |
| 328.3426               | -94.4309    | -4.8698    | 664265.7895 | -9.4539   |
| -9.4405                |             |            |             |           |
| [33711]ENERGY: 8730000 | 3536.5091   | 5854.1156  | 5935.7485   |           |
| 367.2035               | -15396.9217 | -1844.8259 | 0.0000      | 0.0000    |
| 8793.3201              | 7245.1493   | 328.0329   | -1548.1708  | 7315.6496 |
| 328.4817               | 184.2966    | 17.3353    | 664265.7895 | -10.3955  |
| -10.4065               |             |            |             |           |
| [33747]ENERGY: 8740000 | 3566.9755   | 5707.1737  | 5902.4815   |           |
| 363.3604               | -15283.3144 | -1846.5641 | 0.0000      | 0.0000    |
| 8832.5141              | 7242.6267   | 329.4950   | -1589.8874  | 7314.8897 |
| 328.2018               | 207.2703    | 63.5861    | 664265.7895 | -9.4797   |
| -9.4897                |             |            |             |           |
| [33797]ENERGY: 8750000 | 3557.5431   | 5744.8838  | 5943.3681   |           |
| 358.1430               | -15360.7645 | -1812.6152 | 0.0000      | 0.0000    |
| 8812.6316              | 7243.1900   | 328.7533   | -1569.4416  | 7315.4712 |
| 327.9873               | 94.0938     | 10.5920    | 664265.7895 | -9.6200   |
| -9.6321                |             |            |             |           |
| [33833]ENERGY: 8760000 | 3604.8287   | 5797.4891  | 5938.2644   |           |
| 368.2517               | -15326.6468 | -1948.1203 | 0.0000      | 0.0000    |
| 8809.1647              | 7243.2315   | 328.6240   | -1565.9332  | 7316.7929 |
| 327.9656               | -19.0449    | -7.7353    | 664265.7895 | -13.5850  |
| -13.5630               |             |            |             |           |
| [33883]ENERGY: 8770000 | 3627.3005   | 5819.8072  | 5974.4876   |           |
| 374.1714               | -15404.6037 | -1840.0698 | 0.0000      | 0.0000    |
| 8691.8081              | 7242.9013   | 324.2460   | -1448.9068  | 7315.6614 |
| 328.0299               | -2.5135     | -27.2889   | 664265.7895 | -11.8769  |
| -11.8666               |             |            |             |           |
| [33919]ENERGY: 8780000 | 3653.2169   | 5754.9538  | 5920.9430   |           |
| 380.0990               | -15393.6554 | -1863.9701 | 0.0000      | 0.0000    |
| 8797.7588              | 7249.3460   | 328.1985   | -1548.4128  | 7316.6278 |
| 328.3097               | 8.6773      | -19.2642   | 664265.7895 | -8.1959   |
| -8.2094                |             |            |             |           |
| [33969]ENERGY: 8790000 | 3511.3457   | 5834.1011  | 5959.3942   |           |
| 365.3750               | -15396.3442 | -1846.9153 | 0.0000      | 0.0000    |
| 8819.5135              | 7246.4702   | 329.0101   | -1573.0434  | 7316.6248 |
| 328.3383               | 225.1601    | 147.0156   | 664265.7895 | -8.5613   |
| -8.5595                |             |            |             |           |
| [34008]ENERGY: 8800000 | 3678.6103   | 5898.3590  | 5920.3832   |           |
| 358.9929               | -15538.2310 | -1819.5746 | 0.0000      | 0.0000    |
| 8751.6235              | 7250.1634   | 326.4774   | -1501.4601  | 7316.1069 |
| 328.6407               | -78.6849    | -118.1746  | 664265.7895 | -7.5919   |
| -7.5854                |             |            |             |           |
| [34058]ENERGY: 8810000 | 3610.5677   | 5794.1315  | 5964.7559   |           |
| 363.6703               | -15469.1453 | -1775.4238 | 0.0000      | 0.0000    |

## Supplementary Text 6

|                        |             |            |             |           |
|------------------------|-------------|------------|-------------|-----------|
| 8756.5357              | 7245.0921   | 326.6607   | -1511.4436  | 7315.6034 |
| 328.6695               | 121.3090    | 78.8193    | 664265.7895 | -7.5918   |
| -7.5978                |             |            |             |           |
| [34094]ENERGY: 8820000 | 3597.8374   | 5775.7896  | 5896.0155   |           |
| 367.8138               | -15418.4998 | -1876.8701 | 0.0000      | 0.0000    |
| 8900.4924              | 7242.5789   | 332.0310   | -1657.9135  | 7317.1405 |
| 328.6119               | -46.8430    | -64.1583   | 664265.7895 | -6.1523   |
| -6.1441                |             |            |             |           |
| [34144]ENERGY: 8830000 | 3580.3970   | 5927.6092  | 5873.1408   |           |
| 355.3412               | -15478.6754 | -1840.1327 | 0.0000      | 0.0000    |
| 8828.0856              | 7245.7656   | 329.3298   | -1582.3199  | 7317.0893 |
| 328.5252               | 136.1860    | 77.6190    | 664265.7895 | -8.7751   |
| -8.7634                |             |            |             |           |
| [34180]ENERGY: 8840000 | 3529.3145   | 5846.1372  | 5893.8639   |           |
| 349.9313               | -15400.4339 | -1834.6771 | 0.0000      | 0.0000    |
| 8858.0138              | 7242.1496   | 330.4463   | -1615.8642  | 7316.9439 |
| 328.9732               | 59.0468     | 57.9218    | 664265.7895 | -6.5364   |
| -6.5535                |             |            |             |           |
| [34230]ENERGY: 8850000 | 3593.6757   | 5782.5132  | 5882.4877   |           |
| 357.4779               | -15397.4289 | -1831.1157 | 0.0000      | 0.0000    |
| 8854.4542              | 7242.0643   | 330.3135   | -1612.3899  | 7316.8186 |
| 328.5512               | 63.1943     | 53.0044    | 664265.7895 | -10.0840  |
| -10.0745               |             |            |             |           |
| [34266]ENERGY: 8860000 | 3583.1244   | 5780.7397  | 5887.7245   |           |
| 353.0493               | -15318.6508 | -1885.8020 | 0.0000      | 0.0000    |
| 8848.5478              | 7248.7329   | 330.0932   | -1599.8149  | 7317.4175 |
| 328.5964               | 36.9236     | -46.7976   | 664265.7895 | -8.4086   |
| -8.4190                |             |            |             |           |
| [34316]ENERGY: 8870000 | 3584.8679   | 5774.2309  | 5891.2658   |           |
| 369.6679               | -15350.2556 | -1879.8704 | 0.0000      | 0.0000    |
| 8854.6843              | 7244.5908   | 330.3221   | -1610.0935  | 7318.1919 |
| 328.4741               | 56.7184     | 34.0378    | 664265.7895 | -5.3940   |
| -5.3937                |             |            |             |           |
| [34352]ENERGY: 8880000 | 3574.1878   | 5934.7086  | 5911.0005   |           |
| 350.8774               | -15509.1696 | -1800.6639 | 0.0000      | 0.0000    |
| 8785.4950              | 7246.4358   | 327.7410   | -1539.0591  | 7316.9330 |
| 328.6614               | 36.0508     | 101.0941   | 664265.7895 | -6.5700   |
| -6.5540                |             |            |             |           |
| [34402]ENERGY: 8890000 | 3613.5925   | 5794.7600  | 5870.3703   |           |
| 366.5157               | -15373.4608 | -1784.9490 | 0.0000      | 0.0000    |
| 8760.8595              | 7247.6881   | 326.8220   | -1513.1713  | 7317.0241 |
| 328.6854               | 14.1292     | -52.3071   | 664265.7895 | -4.5021   |
| -4.5212                |             |            |             |           |
| [34441]ENERGY: 8900000 | 3604.2627   | 5855.1281  | 5882.6487   |           |
| 365.5714               | -15362.1805 | -1944.8283 | 0.0000      | 0.0000    |
| 8848.0831              | 7248.6853   | 330.0758   | -1599.3978  | 7317.3364 |
| 328.6838               | -119.6380   | -56.8399   | 664265.7895 | -2.2979   |
| -2.2914                |             |            |             |           |
| [34491]ENERGY: 8910000 | 3638.9551   | 5794.8687  | 5962.8280   |           |
| 349.6043               | -15520.7339 | -1781.4359 | 0.0000      | 0.0000    |
| 8803.1046              | 7247.1909   | 328.3979   | -1555.9137  | 7316.0090 |
| 328.7197               | 84.7347     | 71.1157    | 664265.7895 | -3.3328   |
| -3.3245                |             |            |             |           |
| [34527]ENERGY: 8920000 | 3588.2772   | 5868.7937  | 5882.5123   |           |

## Supplementary Text 6

|                        |             |            |             |           |
|------------------------|-------------|------------|-------------|-----------|
| 386.1237               | -15391.5355 | -1878.7693 | 0.0000      | 0.0000    |
| 8789.7197              | 7245.1218   | 327.8986   | -1544.5978  | 7316.6520 |
| 328.6984               | 133.4976    | 75.4413    | 664265.7895 | -8.2554   |
| -8.2677                |             |            |             |           |
| [34577]ENERGY: 8930000 | 3592.0715   | 5954.6622  | 5877.8838   |           |
| 351.8334               | -15532.3093 | -1844.5539 | 0.0000      | 0.0000    |
| 8844.7617              | 7244.3494   | 329.9519   | -1600.4123  | 7316.3427 |
| 328.7635               | -137.7834   | -82.7726   | 664265.7895 | -9.5439   |
| -9.5442                |             |            |             |           |
| [34613]ENERGY: 8940000 | 3622.6003   | 5962.4431  | 5872.8890   |           |
| 344.2272               | -15450.0628 | -1905.7684 | 0.0000      | 0.0000    |
| 8797.8891              | 7244.2175   | 328.2034   | -1553.6716  | 7316.9151 |
| 328.8864               | -66.4109    | -17.5834   | 664265.7895 | -2.2403   |
| -2.2534                |             |            |             |           |
| [34663]ENERGY: 8950000 | 3701.6733   | 5779.0552  | 5903.3354   |           |
| 369.0657               | -15527.3945 | -1794.6499 | 0.0000      | 0.0000    |
| 8815.1335              | 7246.2187   | 328.8467   | -1568.9148  | 7317.7733 |
| 328.8978               | 26.9245     | -89.7754   | 664265.7895 | -6.4217   |
| -6.4124                |             |            |             |           |
| [34699]ENERGY: 8960000 | 3566.6112   | 5929.2281  | 5884.0202   |           |
| 358.7275               | -15530.3513 | -1735.2972 | 0.0000      | 0.0000    |
| 8774.2309              | 7247.1695   | 327.3208   | -1527.0615  | 7317.6073 |
| 328.8248               | 151.4959    | 49.9941    | 664265.7895 | -8.1955   |
| -8.1851                |             |            |             |           |
| [34749]ENERGY: 8970000 | 3546.5575   | 5789.5531  | 5959.9230   |           |
| 377.4493               | -15426.6224 | -1842.8010 | 0.0000      | 0.0000    |
| 8841.8780              | 7245.9376   | 329.8444   | -1595.9404  | 7317.7020 |
| 328.7778               | 167.7880    | 143.8390   | 664265.7895 | -2.5782   |
| -2.5986                |             |            |             |           |
| [34785]ENERGY: 8980000 | 3609.6035   | 5949.6033  | 5897.9588   |           |
| 372.5688               | -15491.8452 | -1820.8379 | 0.0000      | 0.0000    |
| 8726.5792              | 7243.6305   | 325.5432   | -1482.9487  | 7318.1559 |
| 328.9000               | 25.4762     | 103.4745   | 664265.7895 | -3.0037   |
| -2.9858                |             |            |             |           |
| [34835]ENERGY: 8990000 | 3617.7931   | 5937.0140  | 5931.2068   |           |
| 370.0608               | -15521.4513 | -1794.6699 | 0.0000      | 0.0000    |
| 8706.4835              | 7246.4369   | 324.7935   | -1460.0466  | 7318.2343 |
| 328.8250               | -51.6660    | -45.1870   | 664265.7895 | -5.7958   |
| -5.7992                |             |            |             |           |
| [34874]ENERGY: 9000000 | 3613.9099   | 5885.3924  | 5898.3741   |           |
| 372.5520               | -15359.2395 | -1863.1242 | 0.0000      | 0.0000    |
| 8701.6281              | 7249.4927   | 324.6124   | -1452.1353  | 7319.1418 |
| 328.6053               | -23.8557    | -107.8771  | 664265.7895 | -4.9710   |
| -4.9808                |             |            |             |           |
| [34924]ENERGY: 9010000 | 3554.3552   | 5861.8770  | 5895.8748   |           |
| 368.8678               | -15344.9587 | -1810.2212 | 0.0000      | 0.0000    |
| 8725.2785              | 7251.0734   | 325.4946   | -1474.2051  | 7319.4925 |
| 328.5961               | 176.8213    | 104.7038   | 664265.7895 | -7.1626   |
| -7.1519                |             |            |             |           |
| [34960]ENERGY: 9020000 | 3587.8952   | 5906.7079  | 5913.7863   |           |
| 360.5926               | -15477.4925 | -1791.2911 | 0.0000      | 0.0000    |
| 8747.4233              | 7247.6217   | 326.3207   | -1499.8016  | 7319.3401 |
| 328.6808               | 74.2230     | 12.5087    | 664265.7895 | -10.2229  |
| -10.2286               |             |            |             |           |

## Supplementary Text 6

|                        |             |            |             |           |
|------------------------|-------------|------------|-------------|-----------|
| [35010]ENERGY: 9030000 | 3550.2672   | 5821.8748  | 5897.4861   |           |
| 373.6587               | -15417.1595 | -1780.4686 | 0.0000      | 0.0000    |
| 8802.2940              | 7247.9527   | 328.3677   | -1554.3413  | 7318.2666 |
| 328.4631               | 40.6082     | 3.4041     | 664265.7895 | -4.4532   |
| -4.4588                |             |            |             |           |
| [35046]ENERGY: 9040000 | 3620.7776   | 5815.3067  | 5926.1843   |           |
| 359.2307               | -15476.0826 | -1866.3460 | 0.0000      | 0.0000    |
| 8867.3574              | 7246.4282   | 330.7949   | -1620.9292  | 7317.8678 |
| 328.5478               | -149.8174   | -83.2460   | 664265.7895 | -9.0418   |
| -9.0116                |             |            |             |           |
| [35096]ENERGY: 9050000 | 3569.7229   | 5929.7347  | 5921.2222   |           |
| 343.6409               | -15462.7139 | -1834.8925 | 0.0000      | 0.0000    |
| 8777.1428              | 7243.8573   | 327.4294   | -1533.2856  | 7317.2879 |
| 328.7007               | -58.2129    | -34.0269   | 664265.7895 | -9.6966   |
| -9.7009                |             |            |             |           |
| [35132]ENERGY: 9060000 | 3637.4620   | 5798.6293  | 5911.4487   |           |
| 362.7722               | -15418.8716 | -1865.8033 | 0.0000      | 0.0000    |
| 8821.5409              | 7247.1782   | 329.0857   | -1574.3627  | 7319.2008 |
| 328.6101               | 52.9630     | 20.8124    | 664265.7895 | -8.7839   |
| -8.7975                |             |            |             |           |
| [35182]ENERGY: 9070000 | 3606.5942   | 5878.8383  | 5858.3354   |           |
| 341.9912               | -15432.1331 | -1806.3310 | 0.0000      | 0.0000    |
| 8801.7629              | 7249.0578   | 328.3479   | -1552.7051  | 7317.6910 |
| 328.6742               | 107.5625    | 161.9403   | 664265.7895 | -8.0293   |
| -8.0117                |             |            |             |           |
| [35218]ENERGY: 9080000 | 3565.7109   | 5947.7318  | 5893.8300   |           |
| 360.8201               | -15382.8291 | -1917.6662 | 0.0000      | 0.0000    |
| 8779.2323              | 7246.8298   | 327.5074   | -1532.4025  | 7318.1110 |
| 328.2993               | -238.6264   | -170.1273  | 664265.7895 | -8.8457   |
| -8.8697                |             |            |             |           |
| [35268]ENERGY: 9090000 | 3553.4907   | 5866.7542  | 5895.4073   |           |
| 343.3353               | -15468.8600 | -1751.9911 | 0.0000      | 0.0000    |
| 8811.4709              | 7249.6074   | 328.7100   | -1561.8635  | 7318.9738 |
| 328.4117               | 165.6351    | 93.6137    | 664265.7895 | -8.4894   |
| -8.4794                |             |            |             |           |
| [35307]ENERGY: 9100000 | 3545.6060   | 5837.1854  | 5946.7777   |           |
| 361.5630               | -15444.2662 | -1828.8571 | 0.0000      | 0.0000    |
| 8833.1099              | 7251.1186   | 329.5173   | -1581.9913  | 7319.8506 |
| 328.4582               | 125.6973    | 33.2564    | 664265.7895 | -5.7547   |
| -5.7742                |             |            |             |           |
| [35357]ENERGY: 9110000 | 3527.5569   | 5789.0472  | 5918.6936   |           |
| 378.3711               | -15336.3669 | -1818.6275 | 0.0000      | 0.0000    |
| 8791.1989              | 7249.8732   | 327.9538   | -1541.3256  | 7320.6563 |
| 328.4986               | 179.6871    | 74.8324    | 664265.7895 | -3.6591   |
| -3.6482                |             |            |             |           |
| [35393]ENERGY: 9120000 | 3558.4055   | 5814.9034  | 5916.9348   |           |
| 368.1281               | -15481.1049 | -1804.7227 | 0.0000      | 0.0000    |
| 8872.9371              | 7245.4813   | 331.0030   | -1627.4558  | 7319.3477 |
| 328.6908               | 68.5057     | 157.2270   | 664265.7895 | -7.8940   |
| -7.8719                |             |            |             |           |
| [35443]ENERGY: 9130000 | 3637.9098   | 5756.2151  | 5922.3820   |           |
| 379.4736               | -15417.0911 | -1860.3191 | 0.0000      | 0.0000    |
| 8831.2259              | 7249.7962   | 329.4470   | -1581.4298  | 7320.0816 |
| 328.5422               | -82.7587    | -54.1961   | 664265.7895 | -3.1838   |

Supplementary Text 6

-3.2032

|                        |             |            |                      |
|------------------------|-------------|------------|----------------------|
| [35479]ENERGY: 9140000 | 3665.4421   | 5839.8782  | 5945.4952            |
| 337.2329               | -15413.4622 | -1819.4822 | 0.0000 0.0000        |
| 8696.2321              | 7251.3362   | 324.4111   | -1444.8959 7319.7048 |
| 328.5184               | 30.8164     | -13.5574   | 664265.7895 -9.4558  |

-9.4629

|                        |             |            |                      |
|------------------------|-------------|------------|----------------------|
| [35529]ENERGY: 9150000 | 3666.2492   | 5698.9259  | 5890.8337            |
| 345.7108               | -15331.9327 | -1827.2628 | 0.0000 0.0000        |
| 8806.1109              | 7248.6352   | 328.5101   | -1557.4757 7319.9836 |
| 328.4046               | -130.9152   | -70.6067   | 664265.7895 -6.1105  |

-6.0847

|                        |             |            |                      |
|------------------------|-------------|------------|----------------------|
| [35565]ENERGY: 9160000 | 3608.0826   | 5758.4547  | 5874.7892            |
| 379.2714               | -15383.7904 | -1792.2519 | 0.0000 0.0000        |
| 8802.8970              | 7247.4527   | 328.3902   | -1555.4442 7321.1801 |
| 328.5609               | 128.2760    | 173.5899   | 664265.7895 -4.3102  |

-4.3106

|                        |             |            |                      |
|------------------------|-------------|------------|----------------------|
| [35615]ENERGY: 9170000 | 3603.6798   | 5815.0678  | 5875.7499            |
| 356.3267               | -15380.9217 | -1885.1480 | 0.0000 0.0000        |
| 8862.2104              | 7246.9649   | 330.6028   | -1615.2455 7321.5036 |
| 328.6542               | -54.4944    | -85.8197   | 664265.7895 -3.5102  |

-3.5261

|                        |             |            |                      |
|------------------------|-------------|------------|----------------------|
| [35651]ENERGY: 9180000 | 3530.7181   | 5817.3646  | 5975.1512            |
| 331.2516               | -15336.8663 | -1854.2915 | 0.0000 0.0000        |
| 8791.0297              | 7254.3575   | 327.9475   | -1536.6723 7320.8709 |
| 328.5516               | 78.5202     | 40.1708    | 664265.7895 -3.5318  |

-3.5182

|                        |             |            |                      |
|------------------------|-------------|------------|----------------------|
| [35701]ENERGY: 9190000 | 3649.3547   | 5825.0013  | 5919.0442            |
| 356.2751               | -15368.3650 | -1895.9997 | 0.0000 0.0000        |
| 8769.2457              | 7254.5563   | 327.1348   | -1514.6894 7322.2628 |
| 328.5889               | -28.1516    | -29.7503   | 664265.7895 -8.5988  |

-8.6171

|                        |             |            |                      |
|------------------------|-------------|------------|----------------------|
| [35740]ENERGY: 9200000 | 3569.7126   | 5857.2347  | 5874.2922            |
| 354.9587               | -15292.8939 | -1878.4924 | 0.0000 0.0000        |
| 8769.0080              | 7253.8199   | 327.1260   | -1515.1882 7321.5607 |
| 328.7331               | -141.9184   | -76.3154   | 664265.7895 -5.3796  |

-5.3691

|                        |             |            |                      |
|------------------------|-------------|------------|----------------------|
| [35790]ENERGY: 9210000 | 3575.7598   | 5871.6431  | 5982.7768            |
| 341.1116               | -15492.0941 | -1851.2186 | 0.0000 0.0000        |
| 8820.7801              | 7248.7587   | 329.0573   | -1572.0214 7321.5854 |
| 328.7259               | 215.3618    | 158.2466   | 664265.7895 -3.1336  |

-3.1445

|                        |             |            |                      |
|------------------------|-------------|------------|----------------------|
| [35826]ENERGY: 9220000 | 3712.0860   | 5901.7868  | 5893.2053            |
| 346.2967               | -15504.2910 | -1859.7942 | 0.0000 0.0000        |
| 8763.8858              | 7253.1754   | 326.9349   | -1510.7104 7322.2080 |
| 328.5654               | 22.2890     | 25.6179    | 664265.7895 -7.4138  |

-7.4011

|                        |             |            |                      |
|------------------------|-------------|------------|----------------------|
| [35876]ENERGY: 9230000 | 3618.8629   | 5849.4644  | 5951.7865            |
| 341.0377               | -15412.6279 | -1908.2931 | 0.0000 0.0000        |
| 8811.0826              | 7251.3131   | 328.6955   | -1559.7695 7323.2046 |
| 328.7006               | -44.1234    | -61.9097   | 664265.7895 -9.4987  |

-9.5111

|                        |             |            |                      |
|------------------------|-------------|------------|----------------------|
| [35912]ENERGY: 9240000 | 3548.8697   | 5821.7856  | 5938.3215            |
| 372.8291               | -15401.0314 | -1837.7224 | 0.0000 0.0000        |
| 8808.3176              | 7251.3698   | 328.5924   | -1556.9478 7323.4626 |

Supplementary Text 6

|                        |             |            |             |           |
|------------------------|-------------|------------|-------------|-----------|
| 328.8285               | -106.5804   | -17.1837   | 664265.7895 | -3.1191   |
| -3.1158                |             |            |             |           |
| [35962]ENERGY: 9250000 | 3552.7606   | 5911.2909  | 5902.0080   |           |
| 335.1632               | -15434.9495 | -1827.9989 | 0.0000      | 0.0000    |
| 8816.7815              | 7255.0559   | 328.9081   | -1561.7257  | 7322.1923 |
| 328.9074               | 30.7872     | 39.6565    | 664265.7895 | -3.8596   |
| -3.8428                |             |            |             |           |
| [35998]ENERGY: 9260000 | 3652.7773   | 5895.9347  | 5849.9361   |           |
| 324.6543               | -15515.3445 | -1809.2372 | 0.0000      | 0.0000    |
| 8851.9078              | 7250.6285   | 330.2185   | -1601.2793  | 7323.3633 |
| 328.8463               | -74.6257    | -146.3610  | 664265.7895 | -3.8375   |
| -3.8466                |             |            |             |           |
| [36048]ENERGY: 9270000 | 3578.1664   | 5840.1809  | 5874.7229   |           |
| 362.2523               | -15347.4735 | -1908.9614 | 0.0000      | 0.0000    |
| 8851.8449              | 7250.7325   | 330.2162   | -1601.1124  | 7323.3579 |
| 328.8270               | 126.0062    | 18.2363    | 664265.7895 | 1.0329    |
| 1.0196                 |             |            |             |           |
| [36084]ENERGY: 9280000 | 3645.0594   | 5652.7338  | 5925.5128   |           |
| 352.1140               | -15362.6672 | -1864.4186 | 0.0000      | 0.0000    |
| 8900.4918              | 7248.8262   | 332.0309   | -1651.6656  | 7322.1461 |
| 328.7812               | -12.6398    | 23.3289    | 664265.7895 | 1.3998    |
| 1.4056                 |             |            |             |           |
| [36134]ENERGY: 9290000 | 3633.8221   | 5788.1257  | 5969.8971   |           |
| 378.6597               | -15373.0500 | -1913.8582 | 0.0000      | 0.0000    |
| 8771.0917              | 7254.6882   | 327.2037   | -1516.4035  | 7321.7661 |
| 328.8640               | -63.6861    | -25.0462   | 664265.7895 | -2.9679   |
| -2.9682                |             |            |             |           |
| [36173]ENERGY: 9300000 | 3626.3897   | 5866.2475  | 5868.5439   |           |
| 364.0754               | -15430.4725 | -1840.1441 | 0.0000      | 0.0000    |
| 8800.5002              | 7255.1401   | 328.3008   | -1545.3602  | 7323.5151 |
| 328.7334               | 28.2199     | 19.2288    | 664265.7895 | -1.6039   |
| -1.6104                |             |            |             |           |
| [36223]ENERGY: 9310000 | 3606.1609   | 5878.9512  | 5916.6258   |           |
| 376.8939               | -15410.8007 | -1922.6534 | 0.0000      | 0.0000    |
| 8809.6683              | 7254.8459   | 328.6428   | -1554.8224  | 7323.6152 |
| 328.9035               | -145.7781   | -191.0218  | 664265.7895 | -3.0348   |
| -3.0396                |             |            |             |           |
| [36259]ENERGY: 9320000 | 3574.9729   | 5851.9134  | 5919.5786   |           |
| 354.6311               | -15424.8370 | -1837.4932 | 0.0000      | 0.0000    |
| 8811.7014              | 7250.4671   | 328.7186   | -1561.2343  | 7324.7529 |
| 328.7516               | 82.5789     | -75.5073   | 664265.7895 | -8.4391   |
| -8.4361                |             |            |             |           |
| [36309]ENERGY: 9330000 | 3603.0858   | 5793.4604  | 5947.2708   |           |
| 362.1854               | -15333.3101 | -1867.3068 | 0.0000      | 0.0000    |
| 8750.1730              | 7255.5585   | 326.4233   | -1494.6144  | 7324.2943 |
| 328.7842               | 5.4064      | 29.5414    | 664265.7895 | 1.5344    |
| 1.5368                 |             |            |             |           |
| [36345]ENERGY: 9340000 | 3553.6857   | 5910.4552  | 5931.4801   |           |
| 369.7200               | -15420.8703 | -1904.5646 | 0.0000      | 0.0000    |
| 8817.6129              | 7257.5190   | 328.9391   | -1560.0939  | 7325.0943 |
| 328.7763               | -6.9141     | -82.1790   | 664265.7895 | -4.9906   |
| -4.9883                |             |            |             |           |
| [36395]ENERGY: 9350000 | 3632.2043   | 5879.1860  | 5880.0429   |           |
| 355.1428               | -15440.0241 | -1870.1361 | 0.0000      | 0.0000    |



## Supplementary Text 6

|                        |             |            |             |           |
|------------------------|-------------|------------|-------------|-----------|
| 8816.2340              | 7252.6498   | 328.8877   | -1563.5842  | 7324.8961 |
| 328.7166               | 13.3154     | -19.6103   | 664265.7895 | -7.0522   |
| -7.0479                |             |            |             |           |
| [36431]ENERGY: 9360000 | 3586.5100   | 5804.2915  | 5973.5264   |           |
| 351.4555               | -15363.8099 | -1889.7094 | 0.0000      | 0.0000    |
| 8794.2830              | 7256.5472   | 328.0688   | -1537.7358  | 7324.6842 |
| 328.7154               | 9.1422      | -22.6288   | 664265.7895 | -5.5949   |
| -5.6031                |             |            |             |           |
| [36481]ENERGY: 9370000 | 3538.4121   | 5831.8822  | 5925.5196   |           |
| 338.9021               | -15370.2998 | -1894.8214 | 0.0000      | 0.0000    |
| 8881.9044              | 7251.4992   | 331.3375   | -1630.4051  | 7325.4804 |
| 328.8706               | 63.0528     | 81.8452    | 664265.7895 | -6.0384   |
| -6.0330                |             |            |             |           |
| [36517]ENERGY: 9380000 | 3665.6338   | 5850.0590  | 5907.1915   |           |
| 356.6778               | -15403.9009 | -1874.3134 | 0.0000      | 0.0000    |
| 8756.7390              | 7258.0867   | 326.6683   | -1498.6522  | 7326.4537 |
| 328.5303               | -27.7938    | 14.2555    | 664265.7895 | -4.7087   |
| -4.7051                |             |            |             |           |
| [36567]ENERGY: 9390000 | 3579.2754   | 5777.7801  | 5877.7783   |           |
| 351.9148               | -15384.6347 | -1764.8139 | 0.0000      | 0.0000    |
| 8817.6930              | 7254.9931   | 328.9421   | -1562.6999  | 7325.8120 |
| 328.2976               | 46.6703     | 40.3477    | 664265.7895 | -12.9571  |
| -12.9687               |             |            |             |           |
| [36606]ENERGY: 9400000 | 3601.9625   | 5802.5664  | 5926.0824   |           |
| 354.3377               | -15409.2534 | -1876.6016 | 0.0000      | 0.0000    |
| 8855.3180              | 7254.4119   | 330.3457   | -1600.9061  | 7327.5038 |
| 328.3144               | 39.3385     | 31.5500    | 664265.7895 | -7.8780   |
| -7.8548                |             |            |             |           |
| [36656]ENERGY: 9410000 | 3570.8318   | 5828.9761  | 5934.6290   |           |
| 365.7119               | -15360.0905 | -1862.7140 | 0.0000      | 0.0000    |
| 8779.8007              | 7257.1450   | 327.5286   | -1522.6557  | 7326.8501 |
| 328.5225               | 96.9602     | 40.0015    | 664265.7895 | -7.2793   |
| -7.2841                |             |            |             |           |
| [36692]ENERGY: 9420000 | 3608.5706   | 5756.0118  | 5911.1689   |           |
| 354.5546               | -15399.4149 | -1842.6935 | 0.0000      | 0.0000    |
| 8866.5776              | 7254.7752   | 330.7658   | -1611.8024  | 7326.4994 |
| 328.4507               | -2.1210     | 42.9119    | 664265.7895 | -10.1937  |
| -10.1882               |             |            |             |           |
| [36742]ENERGY: 9430000 | 3557.4944   | 5863.5185  | 5874.6967   |           |
| 363.5329               | -15404.1830 | -1843.8172 | 0.0000      | 0.0000    |
| 8847.9898              | 7259.2322   | 330.0724   | -1588.7576  | 7327.5072 |
| 328.5160               | -11.4856    | 11.9141    | 664265.7895 | -9.9626   |
| -9.9820                |             |            |             |           |
| [36778]ENERGY: 9440000 | 3637.7014   | 5803.8874  | 5948.2655   |           |
| 376.2664               | -15367.0700 | -1888.9485 | 0.0000      | 0.0000    |
| 8747.8134              | 7257.9156   | 326.3353   | -1489.8978  | 7325.1021 |
| 328.6781               | -15.4315    | 9.5660     | 664265.7895 | -10.8800  |
| -10.8701               |             |            |             |           |
| [36828]ENERGY: 9450000 | 3674.2163   | 5792.8207  | 5912.8806   |           |
| 375.8607               | -15457.7536 | -1828.5115 | 0.0000      | 0.0000    |
| 8785.4473              | 7254.9605   | 327.7392   | -1530.4868  | 7324.3839 |
| 328.6950               | 29.1904     | 63.9595    | 664265.7895 | -6.9003   |
| -6.9031                |             |            |             |           |
| [36864]ENERGY: 9460000 | 3605.6802   | 5801.5986  | 5937.9741   |           |

## Supplementary Text 6

|                        |             |            |             |           |
|------------------------|-------------|------------|-------------|-----------|
| 360.3929               | -15414.2696 | -1860.0778 | 0.0000      | 0.0000    |
| 8822.7511              | 7254.0494   | 329.1308   | -1568.7017  | 7327.6482 |
| 328.8531               | 104.6778    | -20.8571   | 664265.7895 | -2.4980   |
| -2.5079                |             |            |             |           |
| [36914]ENERGY: 9470000 | 3604.9868   | 5826.3743  | 5890.4119   |           |
| 358.2880               | -15383.9715 | -1828.4467 | 0.0000      | 0.0000    |
| 8791.6932              | 7259.3360   | 327.9722   | -1532.3572  | 7328.6014 |
| 328.9409               | 145.1218    | 77.1097    | 664265.7895 | -0.6934   |
| -0.6937                |             |            |             |           |
| [36950]ENERGY: 9480000 | 3564.2462   | 5735.4486  | 5908.4541   |           |
| 347.8429               | -15367.1555 | -1841.6443 | 0.0000      | 0.0000    |
| 8908.9039              | 7256.0960   | 332.3447   | -1652.8079  | 7330.5428 |
| 329.0417               | 82.3686     | 10.1899    | 664265.7895 | -8.1131   |
| -8.1003                |             |            |             |           |
| [37000]ENERGY: 9490000 | 3559.7375   | 5814.9578  | 5842.1365   |           |
| 354.8899               | -15349.6256 | -1854.4630 | 0.0000      | 0.0000    |
| 8891.1147              | 7258.7479   | 331.6811   | -1632.3669  | 7330.9347 |
| 329.1730               | 187.8715    | 97.2003    | 664265.7895 | -1.4466   |
| -1.4610                |             |            |             |           |
| [37039]ENERGY: 9500000 | 3581.8575   | 5952.3288  | 5868.1255   |           |
| 345.3314               | -15411.3316 | -1885.4597 | 0.0000      | 0.0000    |
| 8810.5440              | 7261.3958   | 328.6754   | -1549.1482  | 7332.1215 |
| 329.1574               | -158.1871   | -153.1440  | 664265.7895 | -7.2325   |
| -7.2150                |             |            |             |           |
| [37089]ENERGY: 9510000 | 3617.5893   | 5806.8168  | 5902.4752   |           |
| 357.4259               | -15359.7249 | -1931.2228 | 0.0000      | 0.0000    |
| 8865.2248              | 7258.5843   | 330.7153   | -1606.6406  | 7332.6597 |
| 329.0745               | -186.7239   | -78.7561   | 664265.7895 | -5.7062   |
| -5.7155                |             |            |             |           |
| [37125]ENERGY: 9520000 | 3610.9783   | 5965.0299  | 5844.3326   |           |
| 356.7948               | -15342.7202 | -1935.8523 | 0.0000      | 0.0000    |
| 8762.2267              | 7260.7898   | 326.8730   | -1501.4369  | 7333.0349 |
| 329.0459               | -52.2486    | -10.2968   | 664265.7895 | -8.5659   |
| -8.5676                |             |            |             |           |
| [37175]ENERGY: 9530000 | 3676.6114   | 5784.2832  | 5889.9422   |           |
| 343.7850               | -15390.8581 | -1809.0298 | 0.0000      | 0.0000    |
| 8767.0010              | 7261.7349   | 327.0511   | -1505.2660  | 7332.6903 |
| 329.0079               | 8.7999      | 4.0164     | 664265.7895 | -5.8450   |
| -5.8332                |             |            |             |           |
| [37211]ENERGY: 9540000 | 3634.4815   | 5837.6715  | 5887.7588   |           |
| 361.5861               | -15269.0091 | -1915.6028 | 0.0000      | 0.0000    |
| 8725.9549              | 7262.8409   | 325.5199   | -1463.1140  | 7334.4045 |
| 329.0638               | -28.2204    | -50.4313   | 664265.7895 | -1.0341   |
| -1.0553                |             |            |             |           |
| [37261]ENERGY: 9550000 | 3637.8525   | 5828.8135  | 5833.8006   |           |
| 363.5637               | -15367.2498 | -1862.5662 | 0.0000      | 0.0000    |
| 8828.5548              | 7262.7691   | 329.3473   | -1565.7857  | 7332.9165 |
| 329.0840               | 3.8620      | 61.3373    | 664265.7895 | -5.9467   |
| -5.9357                |             |            |             |           |
| [37297]ENERGY: 9560000 | 3685.2969   | 5822.2519  | 5913.6985   |           |
| 374.1112               | -15382.6654 | -1917.5126 | 0.0000      | 0.0000    |
| 8769.2886              | 7264.4690   | 327.1364   | -1504.8195  | 7333.7414 |
| 329.1626               | 26.7331     | -30.1731   | 664265.7895 | -8.1170   |
| -8.1178                |             |            |             |           |

## Supplementary Text 6

|                        |             |            |             |           |
|------------------------|-------------|------------|-------------|-----------|
| [37347]ENERGY: 9570000 | 3559.8824   | 5816.7276  | 5941.8113   |           |
| 371.1256               | -15551.3496 | -1778.3744 | 0.0000      | 0.0000    |
| 8899.2397              | 7259.0626   | 331.9842   | -1640.1771  | 7332.9509 |
| 329.3096               | 243.8684    | 179.8359   | 664265.7895 | -2.4109   |
| -2.4114                |             |            |             |           |
| [37383]ENERGY: 9580000 | 3651.9365   | 5763.4311  | 5955.0745   |           |
| 356.3848               | -15398.8996 | -1866.9398 | 0.0000      | 0.0000    |
| 8802.3842              | 7263.3716   | 328.3710   | -1539.0125  | 7332.3674 |
| 329.2401               | -114.2873   | -95.6796   | 664265.7895 | -4.9853   |
| -4.9801                |             |            |             |           |
| [37433]ENERGY: 9590000 | 3631.5657   | 5788.1204  | 5867.8264   |           |
| 359.8016               | -15274.1408 | -1925.0508 | 0.0000      | 0.0000    |
| 8813.3908              | 7261.5133   | 328.7816   | -1551.8775  | 7333.3002 |
| 329.0290               | -190.3902   | -166.4408  | 664265.7895 | -2.3348   |
| -2.3480                |             |            |             |           |
| [37472]ENERGY: 9600000 | 3604.1363   | 5860.3056  | 5890.7476   |           |
| 351.6522               | -15401.0605 | -1865.8232 | 0.0000      | 0.0000    |
| 8818.9547              | 7258.9128   | 328.9892   | -1560.0420  | 7331.2280 |
| 329.1356               | -151.3534   | -93.2326   | 664265.7895 | -4.4866   |
| -4.4643                |             |            |             |           |
| [37522]ENERGY: 9610000 | 3696.7730   | 5777.6505  | 5974.3976   |           |
| 355.9348               | -15353.6384 | -1907.9660 | 0.0000      | 0.0000    |
| 8722.0113              | 7265.1629   | 325.3728   | -1456.8484  | 7331.6600 |
| 329.1846               | -155.5403   | -109.0970  | 664265.7895 | -5.0079   |
| -5.0112                |             |            |             |           |
| [37558]ENERGY: 9620000 | 3619.9980   | 5839.8869  | 5947.5653   |           |
| 366.4103               | -15328.1812 | -1907.2151 | 0.0000      | 0.0000    |
| 8724.7238              | 7263.1880   | 325.4739   | -1461.5358  | 7332.9981 |
| 328.8616               | -93.8370    | -103.0886  | 664265.7895 | -6.3370   |
| -6.3301                |             |            |             |           |
| [37608]ENERGY: 9630000 | 3578.5816   | 5762.7383  | 5920.6882   |           |
| 344.1101               | -15273.4310 | -1890.2972 | 0.0000      | 0.0000    |
| 8820.0735              | 7262.4634   | 329.0309   | -1557.6100  | 7333.8390 |
| 328.7762               | 3.4496      | -1.3485    | 664265.7895 | -10.1624  |
| -10.1861               |             |            |             |           |
| [37644]ENERGY: 9640000 | 3598.6426   | 5803.0986  | 5835.8679   |           |
| 360.4553               | -15293.1428 | -1843.9088 | 0.0000      | 0.0000    |
| 8803.5290              | 7264.5418   | 328.4138   | -1538.9872  | 7333.8527 |
| 328.9728               | 92.7898     | 129.0240   | 664265.7895 | -12.4083  |
| -12.3982               |             |            |             |           |
| [37694]ENERGY: 9650000 | 3591.7876   | 5835.6037  | 5895.3865   |           |
| 359.0487               | -15364.3977 | -1873.1910 | 0.0000      | 0.0000    |
| 8822.2396              | 7266.4772   | 329.1117   | -1555.7624  | 7337.0261 |
| 328.9347               | 33.3733     | -71.1554   | 664265.7895 | -12.1471  |
| -12.1542               |             |            |             |           |
| [37730]ENERGY: 9660000 | 3667.2033   | 5848.9430  | 5858.7471   |           |
| 375.6912               | -15363.7537 | -1878.1760 | 0.0000      | 0.0000    |
| 8757.0373              | 7265.6922   | 326.6794   | -1491.3451  | 7336.9944 |
| 329.0471               | -116.5049   | -129.9311  | 664265.7895 | -6.7620   |
| -6.7477                |             |            |             |           |
| [37780]ENERGY: 9670000 | 3561.9889   | 5789.0593  | 5910.4352   |           |
| 380.6795               | -15324.9324 | -1853.0830 | 0.0000      | 0.0000    |
| 8802.4689              | 7266.6164   | 328.3742   | -1535.8525  | 7335.8508 |
| 329.0874               | -101.0260   | -93.2143   | 664265.7895 | -9.0137   |

Supplementary Text 6

-9.0200  
 [37816]ENERGY: 9680000      3548.8366      5794.3437      5891.3062  
 393.2347      -15343.7011      -1849.2562      0.0000      0.0000  
 8828.8270      7263.5910      329.3575      -1565.2360      7335.8630  
 329.0378      117.8611      125.3118      664265.7895      -7.8551  
 -7.8632  
 [37866]ENERGY: 9690000      3557.8811      5878.9018      5884.9199  
 366.6619      -15299.3551      -1934.9350      0.0000      0.0000  
 8814.1837      7268.2582      328.8112      -1545.9255      7337.4257  
 329.1046      84.5128      -30.2647      664265.7895      -8.4323  
 -8.4479  
 [37905]ENERGY: 9700000      3588.8177      5836.4643      5867.2850  
 337.1590      -15400.3902      -1817.7575      0.0000      0.0000  
 8853.4134      7264.9916      330.2747      -1588.4218      7336.7864  
 328.9658      -107.3020      -123.3977      664265.7895      -8.7044  
 -8.6750  
 [37955]ENERGY: 9710000      3644.6272      5824.3207      5856.8245  
 339.5961      -15371.1268      -1846.8202      0.0000      0.0000  
 8819.3855      7266.8069      329.0053      -1552.5786      7338.1975  
 328.9359      26.7696      -88.0743      664265.7895      -4.6068  
 -4.6194  
 [37991]ENERGY: 9720000      3636.4319      5828.0107      5868.4841  
 357.1121      -15432.4358      -1915.2687      0.0000      0.0000  
 8922.4935      7264.8277      332.8517      -1657.6657      7339.9855  
 329.0787      -27.2019      -83.7825      664265.7895      -6.5809  
 -6.6014  
 [38041]ENERGY: 9730000      3626.3627      5894.6984      5887.4351  
 358.7349      -15374.6264      -1914.2952      0.0000      0.0000  
 8793.4605      7271.7700      328.0381      -1521.6905      7342.1372  
 329.1885      -161.7784      -138.9589      664265.7895      -4.4392  
 -4.4191  
 [38077]ENERGY: 9740000      3640.7994      5833.0565      5891.0207  
 348.9404      -15370.7171      -1897.1683      0.0000      0.0000  
 8822.9342      7268.8658      329.1377      -1554.0684      7341.0462  
 329.2166      4.8393      -101.1728      664265.7895      -4.7486  
 -4.7534  
 [38127]ENERGY: 9750000      3729.7048      5746.7516      5867.7244  
 341.9675      -15308.9177      -1943.2385      0.0000      0.0000  
 8838.8678      7272.8600      329.7321      -1566.0079      7340.9823  
 329.1861      -134.5732      -97.2265      664265.7895      -8.2367  
 -8.2373  
 [38163]ENERGY: 9760000      3543.8147      5927.2356      5881.3943  
 355.2232      -15338.0544      -1829.2392      0.0000      0.0000  
 8729.2578      7269.6320      325.6431      -1459.6258      7340.3059  
 329.1925      -30.9331      -5.4186      664265.7895      -8.0883  
 -8.0896  
 [38213]ENERGY: 9770000      3594.3833      5814.9657      5988.5244  
 361.6307      -15415.6381      -1839.2483      0.0000      0.0000  
 8763.9328      7268.5505      326.9366      -1495.3823      7342.2915  
 329.2260      38.0050      -7.4103      664265.7895      -5.2483  
 -5.2292  
 [38249]ENERGY: 9780000      3664.7723      5849.7612      5906.7833  
 353.3825      -15433.9612      -1872.8203      0.0000      0.0000  
 8804.4097      7272.3276      328.4466      -1532.0821      7341.8059

## Supplementary Text 6

|                        |             |            |             |           |
|------------------------|-------------|------------|-------------|-----------|
| 329.2884               | -206.3797   | -209.5218  | 664265.7895 | -11.0453  |
| -11.0685               |             |            |             |           |
| [38299]ENERGY: 9790000 | 3589.8180   | 5799.8113  | 5952.1610   |           |
| 357.7111               | -15496.1334 | -1795.2816 | 0.0000      | 0.0000    |
| 8862.9698              | 7271.0562   | 330.6312   | -1591.9136  | 7342.5004 |
| 329.2503               | -25.0952    | 74.0238    | 664265.7895 | -10.7591  |
| -10.7338               |             |            |             |           |
| [38338]ENERGY: 9800000 | 3700.5499   | 5786.1129  | 5887.8801   |           |
| 350.8623               | -15398.7999 | -1827.5633 | 0.0000      | 0.0000    |
| 8774.5365              | 7273.5786   | 327.3322   | -1500.9579  | 7344.5411 |
| 329.2779               | 238.2948    | 176.1927   | 664265.7895 | -9.2247   |
| -9.2520                |             |            |             |           |
| [38388]ENERGY: 9810000 | 3644.1149   | 5819.4357  | 5910.7936   |           |
| 351.5391               | -15393.0453 | -1897.9122 | 0.0000      | 0.0000    |
| 8836.7552              | 7271.6810   | 329.6532   | -1565.0742  | 7345.0070 |
| 329.3062               | 124.9722    | -64.9169   | 664265.7895 | -9.4774   |
| -9.4560                |             |            |             |           |
| [38424]ENERGY: 9820000 | 3620.5836   | 5882.4914  | 5933.3428   |           |
| 342.8078               | -15403.5088 | -1885.8149 | 0.0000      | 0.0000    |
| 8787.4745              | 7277.3765   | 327.8148   | -1510.0980  | 7343.9982 |
| 329.3687               | 4.1422      | 38.8777    | 664265.7895 | -11.2716  |
| -11.2655               |             |            |             |           |
| [38474]ENERGY: 9830000 | 3614.3299   | 5804.8165  | 5867.7273   |           |
| 376.4951               | -15265.9064 | -1877.9399 | 0.0000      | 0.0000    |
| 8756.0321              | 7275.5545   | 326.6419   | -1480.4776  | 7344.2566 |
| 328.9845               | 58.6420     | -25.5632   | 664265.7895 | -8.8606   |
| -8.8653                |             |            |             |           |
| [38510]ENERGY: 9840000 | 3539.4261   | 5867.3199  | 5875.0287   |           |
| 340.7472               | -15347.4123 | -1867.6320 | 0.0000      | 0.0000    |
| 8862.1180              | 7269.5955   | 330.5994   | -1592.5225  | 7342.9072 |
| 328.9924               | -2.2600     | -71.1493   | 664265.7895 | -3.9827   |
| -3.9897                |             |            |             |           |
| [38560]ENERGY: 9850000 | 3613.7864   | 5926.1560  | 5851.9413   |           |
| 385.1458               | -15471.9372 | -1801.7311 | 0.0000      | 0.0000    |
| 8771.0383              | 7274.3995   | 327.2017   | -1496.6388  | 7344.7046 |
| 328.9366               | 82.1040     | 10.3688    | 664265.7895 | -3.3010   |
| -3.2903                |             |            |             |           |
| [38596]ENERGY: 9860000 | 3632.0199   | 5816.5133  | 5884.9413   |           |
| 362.1773               | -15282.0810 | -1930.2008 | 0.0000      | 0.0000    |
| 8791.2825              | 7274.6526   | 327.9569   | -1516.6299  | 7345.7397 |
| 329.1548               | -142.9052   | -97.0231   | 664265.7895 | -6.4306   |
| -6.4467                |             |            |             |           |
| [38646]ENERGY: 9870000 | 3607.1770   | 5850.5639  | 5943.9968   |           |
| 358.9517               | -15413.2045 | -1906.9002 | 0.0000      | 0.0000    |
| 8834.0385              | 7274.6232   | 329.5519   | -1559.4153  | 7344.9744 |
| 329.0214               | 144.5026    | 90.2652    | 664265.7895 | -7.2462   |
| -7.2342                |             |            |             |           |
| [38682]ENERGY: 9880000 | 3639.7495   | 5823.2347  | 5925.5101   |           |
| 373.2806               | -15377.3632 | -1889.5225 | 0.0000      | 0.0000    |
| 8778.4449              | 7273.3341   | 327.4780   | -1505.1108  | 7344.5816 |
| 329.0182               | -105.0440   | -171.2152  | 664265.7895 | -6.0805   |
| -6.0701                |             |            |             |           |
| [38732]ENERGY: 9890000 | 3610.8728   | 5831.1813  | 6003.0117   |           |
| 366.0623               | -15424.7752 | -1896.4219 | 0.0000      | 0.0000    |

## Supplementary Text 6

|                         |             |            |             |           |
|-------------------------|-------------|------------|-------------|-----------|
| 8782.9307               | 7272.8617   | 327.6453   | -1510.0690  | 7344.7658 |
| 329.0030                | 88.9251     | 42.7236    | 664265.7895 | -2.0010   |
| -2.0153                 |             |            |             |           |
| [38771]ENERGY: 9900000  | 3681.2392   | 5902.9066  | 5885.6319   |           |
| 355.5067                | -15404.5295 | -1939.9810 | 0.0000      | 0.0000    |
| 8792.6938               | 7273.4677   | 328.0095   | -1519.2261  | 7344.4596 |
| 329.0784                | -27.3408    | -2.3009    | 664265.7895 | -1.8351   |
| -1.8353                 |             |            |             |           |
| [38821]ENERGY: 9910000  | 3617.5658   | 5890.7469  | 5884.1045   |           |
| 337.8555                | -15454.3130 | -1831.1170 | 0.0000      | 0.0000    |
| 8826.0897               | 7270.9324   | 329.2554   | -1555.1574  | 7346.2154 |
| 329.0965                | -35.5927    | -90.6758   | 664265.7895 | -6.6559   |
| -6.6589                 |             |            |             |           |
| [38857]ENERGY: 9920000  | 3596.3797   | 5810.4229  | 5879.7318   |           |
| 364.8810                | -15361.1391 | -1892.6629 | 0.0000      | 0.0000    |
| 8876.3389               | 7273.9524   | 331.1299   | -1602.3865  | 7345.1009 |
| 329.0832                | -29.9141    | -53.9405   | 664265.7895 | -3.5354   |
| -3.5350                 |             |            |             |           |
| [38907]ENERGY: 9930000  | 3663.0686   | 5790.4429  | 5898.7664   |           |
| 369.1321                | -15399.7949 | -1836.3316 | 0.0000      | 0.0000    |
| 8786.6892               | 7271.9728   | 327.7855   | -1514.7165  | 7345.2612 |
| 329.1937                | -50.1233    | -118.3582  | 664265.7895 | -0.8580   |
| -0.8612                 |             |            |             |           |
| [38943]ENERGY: 9940000  | 3642.8695   | 5811.7795  | 5920.8015   |           |
| 368.1680                | -15480.5101 | -1895.6645 | 0.0000      | 0.0000    |
| 8898.3041               | 7265.7481   | 331.9493   | -1632.5560  | 7344.8793 |
| 329.1394                | -189.2682   | -111.1777  | 664265.7895 | -5.4206   |
| -5.4151                 |             |            |             |           |
| [38993]ENERGY: 9950000  | 3617.0011   | 5852.7546  | 5903.9836   |           |
| 375.3761                | -15400.3760 | -1860.3606 | 0.0000      | 0.0000    |
| 8785.4315               | 7273.8103   | 327.7386   | -1511.6212  | 7344.1630 |
| 329.2113                | 51.7182     | 17.5269    | 664265.7895 | -6.6650   |
| -6.6813                 |             |            |             |           |
| [39029]ENERGY: 9960000  | 3654.1351   | 5834.1038  | 5927.1562   |           |
| 354.8104                | -15489.9821 | -1803.1279 | 0.0000      | 0.0000    |
| 8795.9728               | 7273.0682   | 328.1319   | -1522.9046  | 7344.5764 |
| 329.2656                | 135.9224    | 69.1002    | 664265.7895 | -4.1060   |
| -4.1040                 |             |            |             |           |
| [39079]ENERGY: 9970000  | 3615.8092   | 5809.6055  | 5896.3141   |           |
| 357.2878                | -15431.7220 | -1839.7023 | 0.0000      | 0.0000    |
| 8867.7665               | 7275.3589   | 330.8101   | -1592.4077  | 7346.6329 |
| 329.1407                | -37.9628    | -82.4864   | 664265.7895 | -4.1056   |
| -4.1039                 |             |            |             |           |
| [39115]ENERGY: 9980000  | 3599.4796   | 5929.3339  | 5854.3859   |           |
| 353.2427                | -15497.9397 | -1838.6026 | 0.0000      | 0.0000    |
| 8875.4145               | 7275.3143   | 331.0954   | -1600.1002  | 7347.9212 |
| 328.9660                | 133.8679    | 42.7181    | 664265.7895 | -2.6738   |
| -2.6520                 |             |            |             |           |
| [39165]ENERGY: 9990000  | 3667.2067   | 5926.5284  | 5920.2857   |           |
| 392.7777                | -15486.3535 | -1854.9725 | 0.0000      | 0.0000    |
| 8712.5738               | 7278.0464   | 325.0207   | -1434.5274  | 7346.8803 |
| 329.1598                | 30.6852     | -35.0391   | 664265.7895 | 1.6553    |
| 1.6533                  |             |            |             |           |
| [39204]ENERGY: 10000000 | 3636.6527   | 5991.4960  | 5869.2314   |           |

## Supplementary Text 6

|                         |             |            |             |           |
|-------------------------|-------------|------------|-------------|-----------|
| 363.4262                | -15435.8825 | -1845.5639 | 0.0000      | 0.0000    |
| 8698.6882               | 7278.0480   | 324.5027   | -1420.6402  | 7347.4669 |
| 329.1957                | 176.1773    | 123.7576   | 664265.7895 | 1.6311    |
| 1.6337                  |             |            |             |           |
| [39254]ENERGY: 10010000 | 3618.9040   | 5914.8687  | 5917.4605   |           |
| 389.5232                | -15478.3792 | -1870.5762 | 0.0000      | 0.0000    |
| 8782.8598               | 7274.6608   | 327.6427   | -1508.1990  | 7347.4488 |
| 328.9374                | 18.5427     | 21.0555    | 664265.7895 | 1.8047    |
| 1.7912                  |             |            |             |           |
| [39290]ENERGY: 10020000 | 3545.6245   | 5811.9756  | 5901.9987   |           |
| 365.0308                | -15386.9303 | -1862.3394 | 0.0000      | 0.0000    |
| 8898.2851               | 7273.6449   | 331.9486   | -1624.6402  | 7347.7194 |
| 328.9717                | 74.4384     | 46.0695    | 664265.7895 | 0.6251    |
| 0.6207                  |             |            |             |           |
| [39340]ENERGY: 10030000 | 3525.9154   | 5860.7384  | 5925.7225   |           |
| 370.8158                | -15399.9697 | -1832.0565 | 0.0000      | 0.0000    |
| 8823.5821               | 7274.7481   | 329.1618   | -1548.8340  | 7348.0992 |
| 328.9098                | 98.2582     | 19.5044    | 664265.7895 | -2.4992   |
| -2.4835                 |             |            |             |           |
| [39376]ENERGY: 10040000 | 3538.6734   | 5838.3685  | 5894.9368   |           |
| 364.5077                | -15341.2212 | -1866.2587 | 0.0000      | 0.0000    |
| 8846.6351               | 7275.6416   | 330.0218   | -1570.9935  | 7348.8059 |
| 329.2371                | 42.3046     | 88.4258    | 664265.7895 | -0.1457   |
| -0.1608                 |             |            |             |           |
| [39426]ENERGY: 10050000 | 3577.4257   | 5873.7794  | 5909.8397   |           |
| 365.2668                | -15344.5434 | -1880.9737 | 0.0000      | 0.0000    |
| 8777.7149               | 7278.5093   | 327.4508   | -1499.2056  | 7348.7788 |
| 329.0228                | -72.7544    | -63.9317   | 664265.7895 | -4.1385   |
| -4.1211                 |             |            |             |           |
| [39462]ENERGY: 10060000 | 3650.2485   | 5919.2136  | 5884.2941   |           |
| 378.9419                | -15333.0235 | -1966.9442 | 0.0000      | 0.0000    |
| 8747.8072               | 7280.5377   | 326.3351   | -1467.2696  | 7349.1484 |
| 328.8587                | -132.9913   | -121.4092  | 664265.7895 | -5.8102   |
| -5.8178                 |             |            |             |           |
| [39512]ENERGY: 10070000 | 3629.5102   | 5820.5027  | 5863.9026   |           |
| 392.1130                | -15420.1009 | -1816.9130 | 0.0000      | 0.0000    |
| 8808.4734               | 7277.4880   | 328.5982   | -1530.9854  | 7348.7823 |
| 329.1651                | 48.7999     | 0.3525     | 664265.7895 | -4.3339   |
| -4.3353                 |             |            |             |           |
| [39548]ENERGY: 10080000 | 3562.7603   | 5780.3557  | 5963.1478   |           |
| 388.4581                | -15441.1217 | -1811.3843 | 0.0000      | 0.0000    |
| 8834.3184               | 7276.5342   | 329.5623   | -1557.7842  | 7349.6776 |
| 329.0060                | 122.8408    | 72.7029    | 664265.7895 | -7.3626   |
| -7.3727                 |             |            |             |           |
| [39598]ENERGY: 10090000 | 3603.9344   | 5854.1016  | 5930.7232   |           |
| 356.2032                | -15435.9500 | -1808.9393 | 0.0000      | 0.0000    |
| 8776.9043               | 7276.9773   | 327.4205   | -1499.9269  | 7349.0516 |
| 329.0482                | -98.0100    | -138.9246  | 664265.7895 | -4.9405   |
| -4.9301                 |             |            |             |           |
| [39637]ENERGY: 10100000 | 3629.2717   | 5895.8270  | 5943.7285   |           |
| 361.0588                | -15373.3354 | -1917.4407 | 0.0000      | 0.0000    |
| 8741.1026               | 7280.2127   | 326.0849   | -1460.8899  | 7349.7210 |
| 329.2813                | -110.5585   | -172.6302  | 664265.7895 | -8.9686   |
| -8.9895                 |             |            |             |           |

## Supplementary Text 6

|                         |             |            |             |
|-------------------------|-------------|------------|-------------|
| [39687]ENERGY: 10110000 | 3607.4132   | 5836.5762  | 5891.8785   |
| 372.4896                | -15388.0025 | -1807.0408 | 0.0000      |
| 8764.2942               | 7277.6084   | 326.9501   | -1486.6858  |
| 329.1922                | 68.4373     | 53.6838    | 664265.7895 |
| -11.4979                |             |            | -11.5351    |
| [39723]ENERGY: 10120000 | 3631.3975   | 5792.7681  | 5891.4794   |
| 368.2154                | -15412.1944 | -1816.0344 | 0.0000      |
| 8825.8494               | 7281.4809   | 329.2464   | -1544.3685  |
| 329.2362                | -36.7834    | -9.8734    | 664265.7895 |
| -10.6071                |             |            | -10.5748    |
| [39773]ENERGY: 10130000 | 3608.9343   | 5818.2840  | 5983.2639   |
| 334.8646                | -15455.0624 | -1839.2079 | 0.0000      |
| 8827.9508               | 7279.0273   | 329.3248   | -1548.9235  |
| 329.2935                | 18.4590     | -91.8198   | 664265.7895 |
| -7.3067                 |             |            | -7.3354     |
| [39809]ENERGY: 10140000 | 3605.1649   | 5832.7418  | 5867.3737   |
| 350.7670                | -15380.1778 | -1870.0089 | 0.0000      |
| 8874.5277               | 7280.3885   | 331.0623   | -1594.1392  |
| 329.0710                | 102.6022    | 44.1055    | 664265.7895 |
| -12.3316                |             |            | -12.3205    |
| [39859]ENERGY: 10150000 | 3608.8595   | 5832.8787  | 5922.1392   |
| 360.5365                | -15354.2551 | -1884.7576 | 0.0000      |
| 8800.5289               | 7285.9300   | 328.3018   | -1514.5989  |
| 329.2134                | -88.4740    | -75.8628   | 664265.7895 |
| -8.4507                 |             |            | -8.4595     |
| [39895]ENERGY: 10160000 | 3625.9788   | 5845.5838  | 5956.4537   |
| 381.4394                | -15486.7407 | -1828.5731 | 0.0000      |
| 8787.6567               | 7281.7986   | 327.8216   | -1505.8581  |
| 328.8521                | -2.1755     | -43.6327   | 664265.7895 |
| -11.5697                |             |            | -11.5499    |
| [39945]ENERGY: 10170000 | 3671.4528   | 5788.5048  | 5881.7697   |
| 365.6399                | -15348.9693 | -1902.0567 | 0.0000      |
| 8825.4871               | 7281.8284   | 329.2329   | -1543.6586  |
| 328.9584                | 67.1278     | -32.9899   | 664265.7895 |
| -6.7696                 |             |            | -6.7817     |
| [39981]ENERGY: 10180000 | 3658.1208   | 5769.4566  | 5920.3145   |
| 353.6723                | -15504.7248 | -1790.3447 | 0.0000      |
| 8873.9365               | 7280.4312   | 331.0403   | -1593.5053  |
| 328.9413                | -19.0902    | -69.6759   | 664265.7895 |
| -9.1942                 |             |            | -9.1819     |
| [40031]ENERGY: 10190000 | 3594.4066   | 5827.4199  | 5921.6789   |
| 369.1893                | -15351.7852 | -1865.2222 | 0.0000      |
| 8785.1613               | 7280.8486   | 327.7286   | -1504.3128  |
| 329.0613                | -78.2681    | -68.8032   | 664265.7895 |
| -3.8313                 |             |            | -3.8567     |
| [40070]ENERGY: 10200000 | 3558.2946   | 5942.3062  | 5935.3855   |
| 335.4420                | -15443.6605 | -1861.6758 | 0.0000      |
| 8816.9383               | 7283.0303   | 328.9140   | -1533.9080  |
| 329.1931                | -45.2572    | -95.2231   | 664265.7895 |
| -6.4284                 |             |            | -6.4076     |
| [40120]ENERGY: 10210000 | 3657.5452   | 5795.6874  | 5984.8559   |
| 362.2559                | -15403.6152 | -1920.9423 | 0.0000      |
| 8810.6858               | 7286.4726   | 328.6807   | -1524.2132  |
| 329.0320                | 12.4086     | -171.7866  | 664265.7895 |
|                         |             |            | -8.0024     |



Supplementary Text 6

-8.0026  
 [40156]ENERGY: 10220000      3612.2151      5890.1082      5915.8520  
 389.6435      -15451.2395      -1871.1157      0.0000      0.0000  
 8798.8109      7284.2747      328.2377      -1514.5362      7356.2880  
 329.3711      -24.5543      -33.1780      664265.7895      -6.2659  
 -6.2617  
 [40206]ENERGY: 10230000      3592.5714      5882.3104      5956.4701  
 350.5992      -15527.0932      -1818.2692      0.0000      0.0000  
 8846.5055      7283.0941      330.0170      -1563.4113      7355.3374  
 329.4206      145.0382      80.9443      664265.7895      -7.1280  
 -7.1364  
 [40242]ENERGY: 10240000      3582.3093      5931.3677      5889.4088  
 353.0816      -15514.2183      -1793.5335      0.0000      0.0000  
 8831.4853      7279.9011      329.4567      -1551.5842      7354.7506  
 329.1505      169.8826      156.1163      664265.7895      -3.4851  
 -3.4881  
 [40292]ENERGY: 10250000      3551.3465      5837.5840      5949.8343  
 380.2112      -15311.7551      -2018.9222      0.0000      0.0000  
 8895.6345      7283.9332      331.8497      -1611.7013      7355.7493  
 329.4476      -147.0395      -217.6751      664265.7895      -5.2323  
 -5.2148  
 [40328]ENERGY: 10260000      3599.0012      5901.9481      5886.7725  
 347.5125      -15372.6926      -1887.5649      0.0000      0.0000  
 8810.4465      7285.4231      328.6718      -1525.0233      7357.0610  
 329.3781      193.5918      94.2024      664265.7895      -6.0118  
 -6.0193  
 [40378]ENERGY: 10270000      3569.3694      5851.6341      5901.0107  
 394.2537      -15349.2469      -1908.1155      0.0000      0.0000  
 8827.3606      7286.2661      329.3028      -1541.0945      7356.8069  
 329.1205      -27.2542      -14.1011      664265.7895      -8.4029  
 -8.4012  
 [40414]ENERGY: 10280000      3629.0840      5840.4226      5910.0366  
 365.5570      -15419.2773      -1816.4297      0.0000      0.0000  
 8772.1968      7281.5900      327.2449      -1490.6068      7355.8982  
 329.1196      -53.8604      55.5400      664265.7895      -5.8045  
 -5.8001  
 [40464]ENERGY: 10290000      3599.6236      5834.2458      5856.1343  
 345.7384      -15320.3370      -1889.2652      0.0000      0.0000  
 8860.9501      7287.0899      330.5558      -1573.8601      7358.0199  
 329.0433      40.9827      69.8706      664265.7895      -7.8731  
 -7.8812  
 [40503]ENERGY: 10300000      3619.4718      5920.6257      5899.1462  
 347.9103      -15348.6273      -1919.8318      0.0000      0.0000  
 8769.7431      7288.4380      327.1534      -1481.3051      7357.4997  
 329.2177      125.8191      67.0594      664265.7895      -7.6581  
 -7.6494  
 [40553]ENERGY: 10310000      3584.5138      5845.1097      5877.2839  
 351.3098      -15430.1886      -1829.3934      0.0000      0.0000  
 8888.4367      7287.0720      331.5812      -1601.3648      7357.0530  
 329.2231      -44.6087      -40.5489      664265.7895      -4.4224  
 -4.4202  
 [40589]ENERGY: 10320000      3571.6126      5753.8341      5920.2391  
 365.7954      -15347.5235      -1857.9640      0.0000      0.0000  
 8879.9141      7285.9078      331.2633      -1594.0063      7356.8684

## Supplementary Text 6

|                         |             |            |             |           |
|-------------------------|-------------|------------|-------------|-----------|
| 329.2480                | -1.9837     | -29.5516   | 664265.7895 | -1.7120   |
| -1.7137                 |             |            |             |           |
| [40639]ENERGY: 10330000 | 3532.8123   | 5874.7159  | 5917.9402   |           |
| 352.4265                | -15432.5565 | -1855.8271 | 0.0000      | 0.0000    |
| 8896.5781               | 7286.0893   | 331.8849   | -1610.4888  | 7358.5536 |
| 329.2694                | 17.5375     | 39.0880    | 664265.7895 | -0.6943   |
| -0.7095                 |             |            |             |           |
| [40675]ENERGY: 10340000 | 3506.9369   | 5822.2236  | 5913.3743   |           |
| 349.9176                | -15305.1001 | -1865.7559 | 0.0000      | 0.0000    |
| 8864.8341               | 7286.4304   | 330.7007   | -1578.4037  | 7358.2261 |
| 329.1235                | 39.6727     | -7.5423    | 664265.7895 | -13.8117  |
| -13.8094                |             |            |             |           |
| [40725]ENERGY: 10350000 | 3588.1418   | 5847.8223  | 5954.1533   |           |
| 364.7747                | -15434.4898 | -1851.4333 | 0.0000      | 0.0000    |
| 8821.4480               | 7290.4170   | 329.0822   | -1531.0310  | 7360.2255 |
| 329.2271                | 78.5141     | 23.0395    | 664265.7895 | -6.2894   |
| -6.2739                 |             |            |             |           |
| [40761]ENERGY: 10360000 | 3613.9866   | 5888.2150  | 5895.5703   |           |
| 360.2456                | -15419.8493 | -1860.6787 | 0.0000      | 0.0000    |
| 8813.9804               | 7291.4700   | 328.8036   | -1522.5105  | 7359.4164 |
| 329.0921                | -108.2218   | -122.6184  | 664265.7895 | -5.2924   |
| -5.2961                 |             |            |             |           |
| [40811]ENERGY: 10370000 | 3675.7392   | 5837.0123  | 5922.3667   |           |
| 350.9420                | -15408.9751 | -1910.6014 | 0.0000      | 0.0000    |
| 8823.0250               | 7289.5086   | 329.1410   | -1533.5164  | 7359.7333 |
| 329.0653                | -119.8345   | -202.9010  | 664265.7895 | -2.2506   |
| -2.2558                 |             |            |             |           |
| [40847]ENERGY: 10380000 | 3582.5387   | 5852.1119  | 5913.6638   |           |
| 372.0473                | -15339.0604 | -1898.8230 | 0.0000      | 0.0000    |
| 8809.0254               | 7291.5038   | 328.6188   | -1517.5217  | 7359.6824 |
| 329.3029                | 27.7481     | 62.9595    | 664265.7895 | -4.1771   |
| -4.1719                 |             |            |             |           |
| [40897]ENERGY: 10390000 | 3514.3075   | 5939.2032  | 5867.5309   |           |
| 352.2444                | -15269.1793 | -1948.8038 | 0.0000      | 0.0000    |
| 8830.5717               | 7285.8745   | 329.4226   | -1544.6972  | 7358.9140 |
| 329.3733                | -109.8117   | -41.4587   | 664265.7895 | -6.0869   |
| -6.0846                 |             |            |             |           |
| [40936]ENERGY: 10400000 | 3581.2307   | 5790.6833  | 5978.0370   |           |
| 352.4147                | -15456.6471 | -1844.8511 | 0.0000      | 0.0000    |
| 8886.0114               | 7286.8789   | 331.4907   | -1599.1325  | 7357.6625 |
| 329.3850                | 97.3475     | 68.7742    | 664265.7895 | -2.0609   |
| -2.0704                 |             |            |             |           |
| [40986]ENERGY: 10410000 | 3644.4379   | 5877.2148  | 5867.0102   |           |
| 354.0043                | -15441.7948 | -1861.1292 | 0.0000      | 0.0000    |
| 8844.0184               | 7283.7616   | 329.9242   | -1560.2568  | 7358.2080 |
| 329.5214                | 182.5928    | 48.0789    | 664265.7895 | -5.2841   |
| -5.2676                 |             |            |             |           |
| [41022]ENERGY: 10420000 | 3680.5549   | 5842.3082  | 5945.9680   |           |
| 367.5147                | -15436.1459 | -1875.2743 | 0.0000      | 0.0000    |
| 8764.9691               | 7289.8946   | 326.9753   | -1475.0745  | 7359.1208 |
| 329.6472                | -175.6676   | -144.8780  | 664265.7895 | -0.6652   |
| -0.6753                 |             |            |             |           |
| [41072]ENERGY: 10430000 | 3680.2660   | 5858.5761  | 5897.4738   |           |
| 360.1179                | -15424.1357 | -1884.0145 | 0.0000      | 0.0000    |

## Supplementary Text 6

|                         |             |            |             |           |
|-------------------------|-------------|------------|-------------|-----------|
| 8800.2803               | 7288.5640   | 328.2926   | -1511.7163  | 7360.3649 |
| 329.4009                | 2.2635      | -84.1045   | 664265.7895 | -6.2303   |
| -6.2440                 |             |            |             |           |
| [41108]ENERGY: 10440000 | 3523.6241   | 5890.7464  | 5940.5850   |           |
| 346.6638                | -15321.0914 | -1945.1081 | 0.0000      | 0.0000    |
| 8852.3022               | 7287.7220   | 330.2332   | -1564.5802  | 7360.5605 |
| 329.6311                | 54.9962     | -5.4061    | 664265.7895 | -2.1626   |
| -2.1520                 |             |            |             |           |
| [41158]ENERGY: 10450000 | 3660.4480   | 5954.4618  | 5833.6366   |           |
| 362.7875                | -15416.0766 | -1863.0610 | 0.0000      | 0.0000    |
| 8759.8235               | 7292.0197   | 326.7833   | -1467.8038  | 7359.5548 |
| 329.5084                | -30.3172    | -55.3011   | 664265.7895 | -2.1086   |
| -2.0982                 |             |            |             |           |
| [41194]ENERGY: 10460000 | 3644.1553   | 5776.2819  | 5924.3520   |           |
| 359.5179                | -15399.9270 | -1860.3505 | 0.0000      | 0.0000    |
| 8845.8662               | 7289.8957   | 329.9931   | -1555.9704  | 7361.4557 |
| 329.5578                | -88.8842    | -139.2301  | 664265.7895 | -2.7133   |
| -2.7183                 |             |            |             |           |
| [41244]ENERGY: 10470000 | 3541.0021   | 5844.5586  | 5876.7215   |           |
| 356.1163                | -15361.2839 | -1887.2800 | 0.0000      | 0.0000    |
| 8920.3339               | 7290.1683   | 332.7711   | -1630.1656  | 7362.0709 |
| 329.6960                | -46.2388    | -76.4312   | 664265.7895 | -4.7925   |
| -4.7923                 |             |            |             |           |
| [41280]ENERGY: 10480000 | 3642.9915   | 5865.3485  | 5867.6753   |           |
| 353.0509                | -15295.1067 | -1913.7727 | 0.0000      | 0.0000    |
| 8770.4623               | 7290.6492   | 327.1802   | -1479.8131  | 7363.0097 |
| 329.6477                | 13.2987     | -59.2738   | 664265.7895 | -6.2734   |
| -6.2833                 |             |            |             |           |
| [41330]ENERGY: 10490000 | 3582.5295   | 5771.4730  | 5932.7172   |           |
| 352.3486                | -15305.0009 | -1852.0138 | 0.0000      | 0.0000    |
| 8811.0679               | 7293.1215   | 328.6950   | -1517.9464  | 7362.0918 |
| 329.6865                | 71.6319     | 84.3017    | 664265.7895 | -6.8996   |
| -6.9034                 |             |            |             |           |
| [41369]ENERGY: 10500000 | 3545.9934   | 5790.2484  | 5933.0173   |           |
| 366.1748                | -15385.4184 | -1799.5047 | 0.0000      | 0.0000    |
| 8843.8848               | 7294.3956   | 329.9192   | -1549.4892  | 7363.1949 |
| 329.4572                | 0.8138      | 66.8101    | 664265.7895 | -7.9676   |
| -7.9531                 |             |            |             |           |
| [41419]ENERGY: 10510000 | 3623.6417   | 5790.8821  | 5949.3212   |           |
| 347.4375                | -15426.0247 | -1796.9410 | 0.0000      | 0.0000    |
| 8807.2353               | 7295.5521   | 328.5520   | -1511.6832  | 7365.5831 |
| 329.3397                | 185.4142    | 99.9283    | 664265.7895 | -12.3187  |
| -12.3376                |             |            |             |           |
| [41455]ENERGY: 10520000 | 3602.2885   | 5771.2590  | 5941.4603   |           |
| 351.8183                | -15428.3810 | -1885.6137 | 0.0000      | 0.0000    |
| 8937.1292               | 7289.9606   | 333.3977   | -1647.1686  | 7364.0770 |
| 329.7618                | 100.0381    | 50.1485    | 664265.7895 | -8.0437   |
| -8.0132                 |             |            |             |           |
| [41505]ENERGY: 10530000 | 3638.1245   | 5847.3259  | 5924.0033   |           |
| 385.1675                | -15396.3178 | -1879.2227 | 0.0000      | 0.0000    |
| 8776.2053               | 7295.2861   | 327.3944   | -1480.9192  | 7363.5555 |
| 329.7396                | -31.7052    | 18.6501    | 664265.7895 | -10.9269  |
| -10.9358                |             |            |             |           |
| [41541]ENERGY: 10540000 | 3679.0831   | 5810.2999  | 5891.0637   |           |

## Supplementary Text 6

|                         |             |            |             |           |
|-------------------------|-------------|------------|-------------|-----------|
| 338.3303                | -15421.1404 | -1821.1539 | 0.0000      | 0.0000    |
| 8816.5893               | 7293.0720   | 328.9010   | -1523.5173  | 7365.8158 |
| 329.6293                | 56.4692     | -1.2787    | 664265.7895 | -7.5049   |
| -7.5105                 |             |            |             |           |
| [41591]ENERGY: 10550000 | 3546.2750   | 5910.3231  | 5924.2552   |           |
| 355.2305                | -15468.1625 | -1853.8865 | 0.0000      | 0.0000    |
| 8876.0622               | 7290.0970   | 331.1196   | -1585.9652  | 7364.9038 |
| 329.9039                | 89.5062     | 64.8675    | 664265.7895 | -5.5762   |
| -5.5741                 |             |            |             |           |
| [41627]ENERGY: 10560000 | 3629.3915   | 5906.2718  | 5879.2253   |           |
| 371.3267                | -15358.1880 | -1865.6468 | 0.0000      | 0.0000    |
| 8735.6383               | 7298.0187   | 325.8811   | -1437.6196  | 7365.9674 |
| 329.7412                | 13.9203     | 53.2925    | 664265.7895 | -2.5670   |
| -2.5764                 |             |            |             |           |
| [41677]ENERGY: 10570000 | 3549.3253   | 5930.6871  | 5878.6022   |           |
| 365.7435                | -15426.9597 | -1861.1193 | 0.0000      | 0.0000    |
| 8856.1960               | 7292.4752   | 330.3785   | -1563.7209  | 7365.7822 |
| 329.6947                | 69.3850     | 10.5111    | 664265.7895 | -2.5642   |
| -2.5489                 |             |            |             |           |
| [41713]ENERGY: 10580000 | 3574.7874   | 5840.3701  | 5898.5128   |           |
| 360.4747                | -15428.4327 | -1791.9861 | 0.0000      | 0.0000    |
| 8840.1931               | 7293.9192   | 329.7815   | -1546.2739  | 7365.1173 |
| 329.7551                | -5.1096     | -50.7456   | 664265.7895 | -7.7974   |
| -7.8240                 |             |            |             |           |
| [41763]ENERGY: 10590000 | 3679.7425   | 5751.2658  | 5864.4163   |           |
| 397.2983                | -15372.1849 | -1876.4753 | 0.0000      | 0.0000    |
| 8850.1938               | 7294.2565   | 330.1546   | -1555.9373  | 7366.9635 |
| 329.9587                | -133.5154   | -151.2790  | 664265.7895 | -5.7088   |
| -5.6978                 |             |            |             |           |
| [41802]ENERGY: 10600000 | 3585.0063   | 5884.0670  | 5915.3863   |           |
| 362.4521                | -15372.8037 | -1941.1786 | 0.0000      | 0.0000    |
| 8863.4275               | 7296.3568   | 330.6483   | -1567.0707  | 7367.5729 |
| 329.9503                | 23.2476     | -45.5446   | 664265.7895 | -5.0271   |
| -5.0186                 |             |            |             |           |
| [41852]ENERGY: 10610000 | 3564.4593   | 5778.4334  | 5853.3970   |           |
| 347.0220                | -15388.3291 | -1791.4370 | 0.0000      | 0.0000    |
| 8931.1052               | 7294.6509   | 333.1730   | -1636.4544  | 7366.2848 |
| 329.8714                | -10.8376    | -26.6711   | 664265.7895 | -5.4044   |
| -5.4194                 |             |            |             |           |
| [41888]ENERGY: 10620000 | 3552.9026   | 5918.4869  | 5874.3286   |           |
| 373.6652                | -15494.8407 | -1796.9758 | 0.0000      | 0.0000    |
| 8865.3400               | 7292.9068   | 330.7196   | -1572.4332  | 7366.8922 |
| 329.9557                | 160.5301    | 71.1977    | 664265.7895 | -5.7225   |
| -5.7227                 |             |            |             |           |
| [41938]ENERGY: 10630000 | 3584.0573   | 5926.3113  | 5883.1374   |           |
| 333.7166                | -15392.0698 | -1891.4872 | 0.0000      | 0.0000    |
| 8852.9324               | 7296.5980   | 330.2567   | -1556.3345  | 7367.4889 |
| 330.0123                | 127.1563    | 37.1711    | 664265.7895 | -10.3565  |
| -10.3581                |             |            |             |           |
| [41974]ENERGY: 10640000 | 3651.5946   | 5805.0689  | 5885.4894   |           |
| 396.5919                | -15495.3025 | -1846.3287 | 0.0000      | 0.0000    |
| 8896.8278               | 7293.9415   | 331.8942   | -1602.8863  | 7366.7172 |
| 330.3240                | 78.3436     | 84.5740    | 664265.7895 | -4.1619   |
| -4.1467                 |             |            |             |           |

## Supplementary Text 6

|                         |             |            |             |
|-------------------------|-------------|------------|-------------|
| [42024]ENERGY: 10650000 | 3563.0146   | 5876.4029  | 5907.7833   |
| 365.3230                | -15408.0583 | -1849.1097 | 0.0000      |
| 8839.8030               | 7295.1587   | 329.7669   | -1544.6443  |
| 330.1584                | 61.7115     | 8.5186     | 664265.7895 |
| -5.8710                 |             |            | -5.8645     |
| [42060]ENERGY: 10660000 | 3580.5449   | 5815.5542  | 5916.8000   |
| 357.3867                | -15399.0665 | -1875.2140 | 0.0000      |
| 8900.4400               | 7296.4453   | 332.0290   | -1603.9947  |
| 330.2970                | 45.8429     | 64.7726    | 664265.7895 |
| -5.3876                 |             |            | -5.3798     |
| [42110]ENERGY: 10670000 | 3638.6289   | 5899.0030  | 5889.9602   |
| 350.3209                | -15521.0543 | -1847.5519 | 0.0000      |
| 8885.3244               | 7294.6313   | 331.4651   | -1590.6931  |
| 330.0846                | 85.8004     | 16.7516    | 664265.7895 |
| -2.2825                 |             |            | -2.3144     |
| [42146]ENERGY: 10680000 | 3681.3935   | 5890.4481  | 5917.0820   |
| 335.9264                | -15512.1783 | -1872.1852 | 0.0000      |
| 8855.5395               | 7296.0260   | 330.3540   | -1559.5135  |
| 330.0435                | 47.5899     | -16.4773   | 664265.7895 |
| -8.1442                 |             |            | -8.1289     |
| [42196]ENERGY: 10690000 | 3560.6833   | 5900.6005  | 5884.1663   |
| 363.3609                | -15429.2577 | -1898.5763 | 0.0000      |
| 8914.8025               | 7295.7796   | 332.5648   | -1619.0229  |
| 329.9877                | 86.6175     | 56.6102    | 664265.7895 |
| -9.0509                 |             |            | -9.0388     |
| [42235]ENERGY: 10700000 | 3631.8200   | 5903.0200  | 5967.0983   |
| 348.4864                | -15469.1097 | -1852.1316 | 0.0000      |
| 8770.4531               | 7299.6366   | 327.1799   | -1470.8165  |
| 330.0015                | 122.3380    | -1.5860    | 664265.7895 |
| -4.9326                 |             |            | -4.9386     |
| [42285]ENERGY: 10710000 | 3640.6077   | 5858.4068  | 5900.8416   |
| 364.1172                | -15291.4567 | -1945.0639 | 0.0000      |
| 8776.9866               | 7304.4394   | 327.4236   | -1472.5473  |
| 329.7869                | -52.2920    | -32.4162   | 664265.7895 |
| -6.2105                 |             |            | -6.2252     |
| [42321]ENERGY: 10720000 | 3650.5649   | 5835.4176  | 5868.5892   |
| 378.9794                | -15328.3413 | -1911.9923 | 0.0000      |
| 8809.6703               | 7302.8878   | 328.6429   | -1506.7825  |
| 330.0487                | -27.0676    | 17.5955    | 664265.7895 |
| -2.8431                 |             |            | -2.8165     |
| [42371]ENERGY: 10730000 | 3563.1469   | 5841.0565  | 5913.2388   |
| 343.9763                | -15352.0919 | -1856.5620 | 0.0000      |
| 8848.5887               | 7301.3534   | 330.0947   | -1547.2352  |
| 330.0472                | 85.0039     | 14.8300    | 664265.7895 |
| -1.1607                 |             |            | -1.1849     |
| [42407]ENERGY: 10740000 | 3631.8767   | 5834.5960  | 5870.7979   |
| 369.5831                | -15345.1139 | -1840.7432 | 0.0000      |
| 8781.7448               | 7302.7414   | 327.6011   | -1479.0034  |
| 329.9245                | 27.8737     | 37.8528    | 664265.7895 |
| -2.4035                 |             |            | -2.3961     |
| [42457]ENERGY: 10750000 | 3656.2165   | 5855.4459  | 5907.6878   |
| 380.5903                | -15445.8075 | -1879.9092 | 0.0000      |
| 8827.0436               | 7301.2674   | 329.2910   | -1525.7763  |
| 329.8566                | -18.6083    | -1.9483    | 664265.7895 |
|                         |             |            | -3.0084     |

## Supplementary Text 6

-2.9982  
[42493]ENERGY: 10760000      3649.1331      5739.3211      5972.2563  
343.8264      -15290.6458      -1953.5704      0.0000      0.0000  
8843.5131      7303.8338      329.9053      -1539.6793      7374.2317  
329.8857      44.0078      -67.1840      664265.7895      -2.6408  
-2.6481  
[42543]ENERGY: 10770000      3656.0392      5818.1420      5879.4908  
364.2849      -15386.0411      -1810.9362      0.0000      0.0000  
8781.4145      7302.3942      327.5888      -1479.0203      7372.5472  
330.0367      48.2456      77.7635      664265.7895      -5.5512  
-5.5419  
[42579]ENERGY: 10780000      3538.4752      5972.7111      5955.2774  
355.0487      -15399.6575      -1902.9257      0.0000      0.0000  
8781.4381      7300.3673      327.5897      -1481.0708      7373.8114  
330.0295      249.9427      124.1673      664265.7895      -9.5275  
-9.5402  
[42629]ENERGY: 10790000      3554.9481      5822.3075      5893.7822  
360.7167      -15478.2210      -1822.7483      0.0000      0.0000  
8969.6108      7300.3960      334.6094      -1669.2148      7372.2455  
330.1016      -4.1417      19.9016      664265.7895      -5.4478  
-5.4379  
[42668]ENERGY: 10800000      3582.0985      5856.9550      5864.1581  
368.6556      -15489.2157      -1873.3734      0.0000      0.0000  
8992.5188      7301.7970      335.4640      -1690.7218      7373.1273  
330.3218      86.4736      33.2869      664265.7895      -4.1093  
-4.1368  
[42718]ENERGY: 10810000      3620.2996      5880.4036      5944.3645  
377.4530      -15401.6550      -1876.2112      0.0000      0.0000  
8758.7455      7303.4000      326.7431      -1455.3455      7373.6631  
330.2448      112.4160      16.1826      664265.7895      -3.8552  
-3.8531  
[42754]ENERGY: 10820000      3634.7246      5830.0169      5891.5810  
359.5845      -15450.2966      -1815.5190      0.0000      0.0000  
8854.5044      7304.5957      330.3154      -1549.9087      7375.1625  
330.1550      51.3668      38.3595      664265.7895      -3.3892  
-3.3864  
[42804]ENERGY: 10830000      3606.0910      5896.2296      5904.3642  
327.4462      -15451.2765      -1877.2652      0.0000      0.0000  
8895.8772      7301.4666      331.8588      -1594.4106      7375.1164  
330.0818      -62.0870      -67.1564      664265.7895      -1.2310  
-1.2223  
[42840]ENERGY: 10840000      3585.0046      5941.1742      5915.8362  
369.6264      -15391.3664      -1880.2783      0.0000      0.0000  
8765.8047      7305.8013      327.0065      -1460.0034      7374.8625  
329.9608      42.6980      24.9933      664265.7895      -5.3960  
-5.3910  
[42890]ENERGY: 10850000      3587.5250      5890.7964      5893.2969  
369.4292      -15423.2987      -1932.9969      0.0000      0.0000  
8919.0100      7303.7619      332.7217      -1615.2481      7375.3000  
330.1528      75.3299      67.9942      664265.7895      -3.5079  
-3.5237  
[42926]ENERGY: 10860000      3639.0561      5869.5493      5839.9868  
377.0277      -15287.8590      -1939.1538      0.0000      0.0000  
8811.3864      7309.9935      328.7069      -1501.3929      7376.6985

## Supplementary Text 6

|                         |             |            |             |           |
|-------------------------|-------------|------------|-------------|-----------|
| 330.1474                | -16.1224    | -42.2424   | 664265.7895 | -3.8980   |
| -3.8943                 |             |            |             |           |
| [42976]ENERGY: 10870000 | 3576.4028   | 5808.2701  | 5891.4981   |           |
| 350.9067                | -15314.2287 | -1844.7006 | 0.0000      | 0.0000    |
| 8839.8490               | 7307.9973   | 329.7687   | -1531.8517  | 7376.2894 |
| 330.2708                | 223.0073    | 145.4542   | 664265.7895 | -2.4765   |
| -2.4669                 |             |            |             |           |
| [43012]ENERGY: 10880000 | 3553.4105   | 5830.7858  | 5915.4449   |           |
| 365.4311                | -15434.1912 | -1901.9812 | 0.0000      | 0.0000    |
| 8971.9783               | 7300.8782   | 334.6977   | -1671.1001  | 7374.8675 |
| 330.1098                | 40.7983     | 31.9218    | 664265.7895 | -5.9821   |
| -5.9907                 |             |            |             |           |
| [43062]ENERGY: 10890000 | 3688.4461   | 5792.6765  | 5932.6029   |           |
| 335.4334                | -15410.6120 | -1852.4599 | 0.0000      | 0.0000    |
| 8823.0807               | 7309.1676   | 329.1431   | -1513.9131  | 7376.7160 |
| 330.2603                | -24.2302    | -67.0352   | 664265.7895 | -3.4494   |
| -3.4557                 |             |            |             |           |
| [43101]ENERGY: 10900000 | 3607.8345   | 5946.7076  | 5856.4398   |           |
| 360.6205                | -15449.0710 | -1860.6238 | 0.0000      | 0.0000    |
| 8844.5106               | 7306.4182   | 329.9426   | -1538.0925  | 7377.4584 |
| 330.4202                | 27.2053     | 17.9513    | 664265.7895 | -3.1482   |
| -3.1398                 |             |            |             |           |
| [43151]ENERGY: 10910000 | 3473.8628   | 5940.2580  | 5924.4023   |           |
| 379.6134                | -15370.7488 | -1949.5511 | 0.0000      | 0.0000    |
| 8907.7505               | 7305.5872   | 332.3017   | -1602.1633  | 7378.2427 |
| 330.5110                | 123.1283    | 15.4836    | 664265.7895 | -6.2800   |
| -6.2814                 |             |            |             |           |
| [43187]ENERGY: 10920000 | 3576.5225   | 5794.3445  | 5895.5659   |           |
| 363.0349                | -15359.5183 | -1884.7878 | 0.0000      | 0.0000    |
| 8921.2934               | 7306.4550   | 332.8069   | -1614.8383  | 7377.8516 |
| 330.0784                | 61.2178     | 96.9288    | 664265.7895 | -7.4468   |
| -7.4342                 |             |            |             |           |
| [43237]ENERGY: 10930000 | 3577.9287   | 5976.3288  | 5911.2080   |           |
| 337.7659                | -15363.4825 | -1937.3437 | 0.0000      | 0.0000    |
| 8807.8380               | 7310.2433   | 328.5745   | -1497.5947  | 7380.8032 |
| 330.1055                | 107.0402    | -17.3321   | 664265.7895 | -6.7908   |
| -6.8083                 |             |            |             |           |
| [43273]ENERGY: 10940000 | 3601.8488   | 5881.4081  | 5918.7619   |           |
| 360.6033                | -15423.9757 | -1839.1665 | 0.0000      | 0.0000    |
| 8813.1759               | 7312.6559   | 328.7736   | -1500.5201  | 7380.8969 |
| 330.2073                | 74.9639     | 56.7687    | 664265.7895 | -4.5501   |
| -4.5483                 |             |            |             |           |
| [43323]ENERGY: 10950000 | 3607.1662   | 5889.8056  | 5949.1938   |           |
| 365.1320                | -15432.3884 | -1930.2229 | 0.0000      | 0.0000    |
| 8859.8745               | 7308.5608   | 330.5157   | -1551.3137  | 7382.0156 |
| 330.3337                | -102.0873   | -104.8804  | 664265.7895 | -5.4118   |
| -5.4090                 |             |            |             |           |
| [43359]ENERGY: 10960000 | 3654.7915   | 5824.8710  | 5898.0716   |           |
| 351.4991                | -15370.8903 | -1941.4910 | 0.0000      | 0.0000    |
| 8893.3502               | 7310.2021   | 331.7645   | -1583.1481  | 7381.9812 |
| 330.2502                | -78.2024    | -83.7884   | 664265.7895 | -15.7303  |
| -15.7357                |             |            |             |           |
| [43409]ENERGY: 10970000 | 3657.6554   | 5904.1437  | 5896.9282   |           |
| 344.1647                | -15297.0986 | -1882.9877 | 0.0000      | 0.0000    |

## Supplementary Text 6

|                         |             |            |             |           |
|-------------------------|-------------|------------|-------------|-----------|
| 8691.9073               | 7314.7131   | 324.2497   | -1377.1941  | 7383.7216 |
| 330.1655                | 86.7748     | -31.9817   | 664265.7895 | -10.4498  |
| -10.4416                |             |            |             |           |
| [43445]ENERGY: 10980000 | 3539.7864   | 5947.9558  | 5931.6768   |           |
| 363.2712                | -15509.4706 | -1852.7171 | 0.0000      | 0.0000    |
| 8891.2405               | 7311.7431   | 331.6858   | -1579.4975  | 7382.5281 |
| 330.5193                | 45.3314     | 78.6856    | 664265.7895 | -12.6341  |
| -12.6469                |             |            |             |           |
| [43495]ENERGY: 10990000 | 3667.5285   | 5953.0983  | 5956.4122   |           |
| 365.3643                | -15451.6885 | -1912.8701 | 0.0000      | 0.0000    |
| 8737.5172               | 7315.3619   | 325.9512   | -1422.1553  | 7383.1917 |
| 330.3797                | 63.9637     | 102.7108   | 664265.7895 | -6.5365   |
| -6.5334                 |             |            |             |           |
| [43534]ENERGY: 11000000 | 3633.0093   | 5799.6111  | 5944.5064   |           |
| 356.9687                | -15395.1721 | -1898.6967 | 0.0000      | 0.0000    |
| 8872.5188               | 7312.7456   | 330.9874   | -1559.7732  | 7382.1513 |
| 330.3903                | -75.0535    | -81.9041   | 664265.7895 | -5.4714   |
| -5.4470                 |             |            |             |           |
| [43584]ENERGY: 11010000 | 3576.5464   | 5878.0085  | 5962.5943   |           |
| 354.7015                | -15404.1674 | -1927.5150 | 0.0000      | 0.0000    |
| 8870.6911               | 7310.8594   | 330.9192   | -1559.8317  | 7382.9280 |
| 330.3063                | -95.8740    | -140.2191  | 664265.7895 | -9.7979   |
| -9.8019                 |             |            |             |           |
| [43620]ENERGY: 11020000 | 3569.1926   | 5859.0619  | 5936.1205   |           |
| 347.5364                | -15314.0911 | -1937.3452 | 0.0000      | 0.0000    |
| 8851.3066               | 7311.7818   | 330.1961   | -1539.5248  | 7383.2703 |
| 330.3114                | 20.4885     | -57.9163   | 664265.7895 | -7.8492   |
| -7.8616                 |             |            |             |           |
| [43670]ENERGY: 11030000 | 3628.1850   | 5865.3828  | 5890.0345   |           |
| 353.1424                | -15356.5153 | -1934.3196 | 0.0000      | 0.0000    |
| 8864.1452               | 7310.0549   | 330.6750   | -1554.0902  | 7384.4339 |
| 330.0913                | 15.8504     | 36.1635    | 664265.7895 | -4.4028   |
| -4.3875                 |             |            |             |           |
| [43706]ENERGY: 11040000 | 3621.4000   | 5880.8807  | 5907.1687   |           |
| 367.3904                | -15278.0009 | -1898.2162 | 0.0000      | 0.0000    |
| 8716.4749               | 7317.0976   | 325.1662   | -1399.3773  | 7384.5114 |
| 330.2557                | -56.9231    | -68.0828   | 664265.7895 | -4.2946   |
| -4.2957                 |             |            |             |           |
| [43756]ENERGY: 11050000 | 3589.7546   | 5722.9549  | 5870.5472   |           |
| 339.0456                | -15270.5220 | -1821.0662 | 0.0000      | 0.0000    |
| 8886.8753               | 7317.5895   | 331.5230   | -1569.2858  | 7384.7778 |
| 330.2884                | 65.7937     | 102.5633   | 664265.7895 | -5.9906   |
| -5.9936                 |             |            |             |           |
| [43792]ENERGY: 11060000 | 3636.0780   | 5918.2818  | 5933.2282   |           |
| 379.0865                | -15400.0690 | -1866.6256 | 0.0000      | 0.0000    |
| 8719.7140               | 7319.6938   | 325.2871   | -1400.0202  | 7386.8377 |
| 330.1716                | -45.4297    | -67.9200   | 664265.7895 | -7.2425   |
| -7.2652                 |             |            |             |           |
| [43842]ENERGY: 11070000 | 3659.0114   | 5860.9410  | 5894.0714   |           |
| 382.0646                | -15391.3024 | -1878.4849 | 0.0000      | 0.0000    |
| 8789.9943               | 7316.2954   | 327.9088   | -1473.6989  | 7386.7409 |
| 330.2317                | -149.8291   | -190.0117  | 664265.7895 | -3.5338   |
| -3.5166                 |             |            |             |           |
| [43878]ENERGY: 11080000 | 3560.4636   | 5907.7919  | 5887.7329   |           |



## Supplementary Text 6

|                         |             |            |             |           |
|-------------------------|-------------|------------|-------------|-----------|
| 388.1062                | -15470.5811 | -1872.1131 | 0.0000      | 0.0000    |
| 8910.8461               | 7312.2466   | 332.4172   | -1598.5995  | 7385.1917 |
| 330.3260                | 82.3625     | 3.9930     | 664265.7895 | -5.8002   |
| -5.7963                 |             |            |             |           |
| [43928]ENERGY: 11090000 | 3635.1390   | 5911.7857  | 5947.4041   |           |
| 341.9235                | -15349.7757 | -1962.2088 | 0.0000      | 0.0000    |
| 8787.9561               | 7312.2239   | 327.8328   | -1475.7322  | 7386.3442 |
| 330.0820                | 20.1115     | -33.8349   | 664265.7895 | -7.9343   |
| -7.9479                 |             |            |             |           |
| [43967]ENERGY: 11100000 | 3652.9666   | 5810.0633  | 5891.5085   |           |
| 344.2946                | -15370.8175 | -1874.4551 | 0.0000      | 0.0000    |
| 8856.8615               | 7310.4219   | 330.4033   | -1546.4396  | 7384.6182 |
| 330.3727                | -73.5055    | -102.6010  | 664265.7895 | -9.6896   |
| -9.6737                 |             |            |             |           |
| [44017]ENERGY: 11110000 | 3676.0815   | 5929.6591  | 5863.2102   |           |
| 360.1392                | -15404.6354 | -1920.3540 | 0.0000      | 0.0000    |
| 8814.0088               | 7318.1094   | 328.8047   | -1495.8994  | 7385.1810 |
| 330.4381                | -23.6613    | -105.9574  | 664265.7895 | -10.0555  |
| -10.0592                |             |            |             |           |
| [44053]ENERGY: 11120000 | 3677.5889   | 5832.4228  | 5908.2623   |           |
| 360.7380                | -15374.3242 | -1941.3329 | 0.0000      | 0.0000    |
| 8851.2897               | 7314.6446   | 330.1955   | -1536.6451  | 7386.1195 |
| 330.3032                | -58.0481    | -149.9137  | 664265.7895 | -6.1694   |
| -6.1692                 |             |            |             |           |
| [44103]ENERGY: 11130000 | 3614.4743   | 5844.3299  | 5885.5833   |           |
| 361.0958                | -15323.3379 | -1870.6633 | 0.0000      | 0.0000    |
| 8803.8061               | 7315.2881   | 328.4241   | -1488.5180  | 7385.4862 |
| 330.2935                | 195.3095    | 148.1399   | 664265.7895 | -5.8993   |
| -5.9085                 |             |            |             |           |
| [44139]ENERGY: 11140000 | 3607.1784   | 5805.7550  | 5875.8661   |           |
| 347.5006                | -15295.0937 | -1930.8104 | 0.0000      | 0.0000    |
| 8901.8396               | 7312.2357   | 332.0812   | -1589.6039  | 7385.3770 |
| 330.5028                | -18.2627    | -55.0454   | 664265.7895 | -6.4475   |
| -6.4394                 |             |            |             |           |
| [44189]ENERGY: 11150000 | 3650.9334   | 5825.0267  | 5904.5061   |           |
| 370.3131                | -15354.9765 | -1839.8890 | 0.0000      | 0.0000    |
| 8754.8621               | 7310.7760   | 326.5982   | -1444.0861  | 7384.3056 |
| 330.3464                | -53.8694    | -24.8535   | 664265.7895 | -5.6946   |
| -5.6866                 |             |            |             |           |
| [44225]ENERGY: 11160000 | 3641.9208   | 5793.4834  | 5943.0879   |           |
| 388.5885                | -15277.7437 | -1934.3543 | 0.0000      | 0.0000    |
| 8760.9427               | 7315.9251   | 326.8251   | -1445.0176  | 7385.0830 |
| 330.1212                | 87.2742     | -16.7580   | 664265.7895 | -10.5002  |
| -10.5152                |             |            |             |           |
| [44275]ENERGY: 11170000 | 3597.3155   | 5960.4131  | 5902.7693   |           |
| 367.9108                | -15491.4418 | -1873.7136 | 0.0000      | 0.0000    |
| 8847.5962               | 7310.8497   | 330.0577   | -1536.7466  | 7385.9961 |
| 330.1990                | 54.3920     | -24.7655   | 664265.7895 | -8.0221   |
| -8.0173                 |             |            |             |           |
| [44311]ENERGY: 11180000 | 3594.7959   | 5893.3528  | 5931.3985   |           |
| 375.6002                | -15316.2079 | -2000.5075 | 0.0000      | 0.0000    |
| 8836.8726               | 7315.3046   | 329.6576   | -1521.5680  | 7386.8639 |
| 330.1297                | -64.7801    | -76.3719   | 664265.7895 | -5.1936   |
| -5.2106                 |             |            |             |           |

## Supplementary Text 6

|                         |             |            |             |
|-------------------------|-------------|------------|-------------|
| [44361]ENERGY: 11190000 | 3525.4756   | 5919.3538  | 5929.1302   |
| 376.8778                | -15425.1462 | -1834.7471 | 0.0000      |
| 8822.5806               | 7313.5247   | 329.1245   | -1509.0559  |
| 330.1110                | 61.7377     | 51.3083    | 664265.7895 |
| -7.0704                 |             |            | -7.0757     |
| [44400]ENERGY: 11200000 | 3646.6189   | 5875.1766  | 5891.1837   |
| 357.2801                | -15359.5363 | -1940.9221 | 0.0000      |
| 8846.4310               | 7316.2320   | 330.0142   | -1530.1991  |
| 329.9924                | -131.3481   | -155.2622  | 664265.7895 |
| -8.4645                 |             |            | -8.4589     |
| [44450]ENERGY: 11210000 | 3520.2181   | 5776.8793  | 5932.3696   |
| 350.8954                | -15326.3935 | -1823.7630 | 0.0000      |
| 8886.4669               | 7316.6728   | 331.5077   | -1569.7942  |
| 329.8468                | 49.0616     | 22.7859    | 664265.7895 |
| -5.8944                 |             |            | -5.9248     |
| [44486]ENERGY: 11220000 | 3569.0501   | 5840.5944  | 5934.8820   |
| 378.7983                | -15339.9606 | -1923.3480 | 0.0000      |
| 8853.8124               | 7313.8286   | 330.2896   | -1539.9838  |
| 329.9364                | 65.8542     | -17.1883   | 664265.7895 |
| -11.9127                |             |            | -11.8951    |
| [44536]ENERGY: 11230000 | 3636.1954   | 5809.3724  | 5913.5942   |
| 354.0301                | -15319.0429 | -1922.0988 | 0.0000      |
| 8849.6306               | 7321.6810   | 330.1336   | -1527.9496  |
| 329.9624                | 18.6637     | -41.6274   | 664265.7895 |
| -11.0189                |             |            | -11.0144    |
| [44572]ENERGY: 11240000 | 3570.2311   | 5879.1745  | 5916.4552   |
| 366.3620                | -15364.4588 | -1926.5447 | 0.0000      |
| 8871.8992               | 7313.1184   | 330.9643   | -1558.7808  |
| 330.2453                | -99.1979    | -61.9460   | 664265.7895 |
| -12.5164                |             |            | -12.5254    |
| [44622]ENERGY: 11250000 | 3586.1319   | 5892.9096  | 5902.8954   |
| 359.8037                | -15474.1909 | -1833.6159 | 0.0000      |
| 8882.8666               | 7316.8003   | 331.3734   | -1566.0663  |
| 330.1208                | 182.0542    | -17.1645   | 664265.7895 |
| -7.0435                 |             |            | -7.0262     |
| [44658]ENERGY: 11260000 | 3738.3659   | 5863.4078  | 5940.2941   |
| 368.4729                | -15451.5662 | -1866.2249 | 0.0000      |
| 8728.6766               | 7321.4262   | 325.6214   | -1407.2504  |
| 330.1473                | -50.9980    | -27.7489   | 664265.7895 |
| -6.4270                 |             |            | -6.4467     |
| [44708]ENERGY: 11270000 | 3695.1430   | 5780.5800  | 5946.4155   |
| 356.2991                | -15445.7921 | -1907.1298 | 0.0000      |
| 8889.2740               | 7314.7898   | 331.6125   | -1574.4842  |
| 330.1847                | -186.8076   | -144.0546  | 664265.7895 |
| -6.0451                 |             |            | -6.0529     |
| [44744]ENERGY: 11280000 | 3621.7192   | 5867.5272  | 5921.1953   |
| 352.9158                | -15355.5204 | -1879.4699 | 0.0000      |
| 8792.6266               | 7320.9936   | 328.0070   | -1471.6329  |
| 330.2513                | 77.2651     | 52.1297    | 664265.7895 |
| -7.4744                 |             |            | -7.4731     |
| [44794]ENERGY: 11290000 | 3546.0235   | 5791.6429  | 5858.4824   |
| 373.0653                | -15347.6180 | -1810.8848 | 0.0000      |
| 8909.1252               | 7319.8365   | 332.3530   | -1589.2887  |
| 330.1315                | 255.5281    | 168.6246   | 664265.7895 |
|                         |             |            | -5.4158     |

Supplementary Text 6

-5.4147  
 [44833]ENERGY: 11300000      3632.9922      5865.4971      5945.9655  
 357.4869      -15529.6545      -1812.1945      0.0000      0.0000  
 8862.1782      7322.2710      330.6016      -1539.9072      7393.2115  
 330.3508      96.4542      66.1377      664265.7895      -7.8806  
 -7.9026  
 [44883]ENERGY: 11310000      3634.6992      5753.2386      5904.1763  
 359.9013      -15361.6040      -1904.4185      0.0000      0.0000  
 8934.1455      7320.1384      333.2864      -1614.0070      7392.8314  
 330.3684      87.9602      17.0193      664265.7895      -6.0174  
 -6.0034  
 [44919]ENERGY: 11320000      3607.8325      5850.9463      5938.9272  
 350.0135      -15354.5280      -1864.4697      0.0000      0.0000  
 8796.0161      7324.7379      328.1335      -1471.2782      7392.6763  
 330.1635      -57.7151      -118.7814      664265.7895      -7.0146  
 -7.0101  
 [44969]ENERGY: 11330000      3588.0823      5788.1848      5842.2098  
 360.9759      -15347.8009      -1827.7287      0.0000      0.0000  
 8917.5854      7321.5085      332.6686      -1596.0769      7392.5593  
 330.2179      57.3882      -18.2735      664265.7895      -2.3647  
 -2.4002  
 [45005]ENERGY: 11340000      3620.7236      5900.1555      5914.5432  
 370.6881      -15403.3526      -1860.3534      0.0000      0.0000  
 8782.6666      7325.0710      327.6355      -1457.5956      7395.1263  
 330.1936      69.8911      60.7335      664265.7895      -8.2820  
 -8.2513  
 [45055]ENERGY: 11350000      3614.0664      5911.9773      5843.0924  
 354.6826      -15441.4927      -1852.2865      0.0000      0.0000  
 8892.5269      7322.5663      331.7338      -1569.9606      7395.2984  
 330.3114      163.7200      148.7944      664265.7895      -7.2847  
 -7.2969  
 [45091]ENERGY: 11360000      3501.6068      5789.6556      5889.0407  
 370.5225      -15278.0620      -1847.2362      0.0000      0.0000  
 8899.0290      7324.5564      331.9764      -1574.4726      7395.8067  
 330.4460      102.5369      19.5675      664265.7895      -6.1050  
 -6.1012  
 [45141]ENERGY: 11370000      3679.5509      5776.1426      5925.4489  
 362.2165      -15318.6446      -1895.3518      0.0000      0.0000  
 8795.8803      7325.2429      328.1284      -1470.6375      7396.3080  
 330.0633      -169.3058      -131.0730      664265.7895      -7.7727  
 -7.7640  
 [45177]ENERGY: 11380000      3607.5596      5946.7338      5870.9625  
 362.4064      -15335.8562      -1944.1645      0.0000      0.0000  
 8819.7835      7327.4250      329.0201      -1492.3585      7397.2106  
 330.1372      -89.4983      -77.6041      664265.7895      -12.8244  
 -12.8114  
 [45227]ENERGY: 11390000      3598.4806      5875.7239      5859.5434  
 372.5481      -15358.5201      -1888.8396      0.0000      0.0000  
 8860.6696      7319.6059      330.5454      -1541.0637      7395.9895  
 330.1854      45.8984      25.3651      664265.7895      -8.7489  
 -8.7452  
 [45266]ENERGY: 11400000      3524.9096      5812.8508      5860.0907  
 381.8968      -15329.7899      -1850.2382      0.0000      0.0000  
 8920.6580      7320.3778      332.7832      -1600.2803      7395.6983

## Supplementary Text 6

|                         |             |            |             |           |
|-------------------------|-------------|------------|-------------|-----------|
| 330.2206                | 209.2082    | 86.8003    | 664265.7895 | -10.9788  |
| -11.0057                |             |            |             |           |
| [45316]ENERGY: 11410000 | 3692.1768   | 5797.6432  | 5932.5836   |           |
| 372.0593                | -15375.2484 | -1917.5644 | 0.0000      | 0.0000    |
| 8824.0114               | 7325.6616   | 329.1778   | -1498.3499  | 7397.3340 |
| 330.4726                | -55.0894    | -126.8007  | 664265.7895 | -9.9220   |
| -9.9125                 |             |            |             |           |
| [45352]ENERGY: 11420000 | 3580.7781   | 6020.2297  | 5916.1780   |           |
| 375.0579                | -15361.6940 | -1938.4051 | 0.0000      | 0.0000    |
| 8732.1463               | 7324.2910   | 325.7508   | -1407.8553  | 7396.1778 |
| 330.4179                | -69.0062    | -98.8524   | 664265.7895 | -11.4015  |
| -11.4112                |             |            |             |           |
| [45402]ENERGY: 11430000 | 3610.6176   | 5879.5323  | 5862.3690   |           |
| 352.9817                | -15414.8047 | -1881.9762 | 0.0000      | 0.0000    |
| 8912.6334               | 7321.3531   | 332.4839   | -1591.2803  | 7396.7320 |
| 330.4183                | -110.2959   | -109.7920  | 664265.7895 | -10.7429  |
| -10.7243                |             |            |             |           |
| [45438]ENERGY: 11440000 | 3679.3441   | 5808.0098  | 5840.7516   |           |
| 337.6496                | -15329.6853 | -1907.9084 | 0.0000      | 0.0000    |
| 8898.2775               | 7326.4389   | 331.9483   | -1571.8386  | 7396.5850 |
| 330.3861                | -9.9234     | -88.6642   | 664265.7895 | -12.2685  |
| -12.2789                |             |            |             |           |
| [45488]ENERGY: 11450000 | 3648.3814   | 5759.2136  | 5920.6987   |           |
| 371.8806                | -15369.4158 | -1886.3188 | 0.0000      | 0.0000    |
| 8879.8775               | 7324.3173   | 331.2619   | -1555.5602  | 7395.3549 |
| 330.3616                | -83.2021    | -137.0821  | 664265.7895 | -11.3816  |
| -11.3759                |             |            |             |           |
| [45524]ENERGY: 11460000 | 3649.8363   | 5837.5983  | 5928.8186   |           |
| 357.4415                | -15369.6883 | -1910.9290 | 0.0000      | 0.0000    |
| 8833.7192               | 7326.7965   | 329.5400   | -1506.9227  | 7397.7945 |
| 330.1169                | -26.7349    | -79.6881   | 664265.7895 | -9.5812   |
| -9.5755                 |             |            |             |           |
| [45574]ENERGY: 11470000 | 3580.9457   | 5838.5697  | 5907.4742   |           |
| 348.1867                | -15360.3242 | -1940.1048 | 0.0000      | 0.0000    |
| 8946.9070               | 7321.6542   | 333.7624   | -1625.2528  | 7397.1706 |
| 330.2582                | 141.3291    | 48.0343    | 664265.7895 | -14.0440  |
| -14.0674                |             |            |             |           |
| [45610]ENERGY: 11480000 | 3530.8986   | 5841.5580  | 5953.3704   |           |
| 352.2468                | -15384.2558 | -1870.6501 | 0.0000      | 0.0000    |
| 8897.3945               | 7320.5623   | 331.9154   | -1576.8322  | 7396.3787 |
| 330.3356                | -103.0056   | -53.4826   | 664265.7895 | -11.3204  |
| -11.3071                |             |            |             |           |
| [45660]ENERGY: 11490000 | 3573.8431   | 5956.3746  | 5905.0118   |           |
| 335.7507                | -15354.7212 | -1927.4247 | 0.0000      | 0.0000    |
| 8837.9911               | 7326.8255   | 329.6994   | -1511.1656  | 7396.0415 |
| 330.2707                | 157.7348    | 112.7979   | 664265.7895 | -9.3915   |
| -9.3780                 |             |            |             |           |
| [45699]ENERGY: 11500000 | 3660.5520   | 5837.8407  | 5941.0796   |           |
| 394.3794                | -15477.6507 | -1853.3958 | 0.0000      | 0.0000    |
| 8822.9833               | 7325.7885   | 329.1395   | -1497.1947  | 7397.7257 |
| 330.3403                | 186.3234    | 156.5836   | 664265.7895 | -11.1740  |
| -11.1788                |             |            |             |           |
| [45749]ENERGY: 11510000 | 3544.0673   | 5852.4794  | 5900.5321   |           |
| 366.0767                | -15370.4444 | -1853.7708 | 0.0000      | 0.0000    |

## Supplementary Text 6

|                         |             |            |             |           |
|-------------------------|-------------|------------|-------------|-----------|
| 8888.0835               | 7327.0239   | 331.5680   | -1561.0597  | 7396.0112 |
| 330.5109                | -26.0554    | -33.7674   | 664265.7895 | -14.3421  |
| -14.3613                |             |            |             |           |
| [45785]ENERGY: 11520000 | 3583.6990   | 5832.1158  | 5878.8095   |           |
| 369.8923                | -15426.9654 | -1927.0515 | 0.0000      | 0.0000    |
| 9012.7675               | 7323.2673   | 336.2193   | -1689.5002  | 7396.4718 |
| 330.7545                | -19.3028    | -127.6212  | 664265.7895 | -11.1556  |
| -11.1565                |             |            |             |           |
| [45835]ENERGY: 11530000 | 3509.7194   | 5898.5985  | 5931.3056   |           |
| 376.4260                | -15354.7158 | -1860.7613 | 0.0000      | 0.0000    |
| 8818.4208               | 7318.9931   | 328.9693   | -1499.4277  | 7395.3259 |
| 330.5795                | 52.5943     | -3.5206    | 664265.7895 | -11.3505  |
| -11.3425                |             |            |             |           |
| [45871]ENERGY: 11540000 | 3529.5926   | 5858.7189  | 5888.8282   |           |
| 353.0637                | -15324.0429 | -1895.1073 | 0.0000      | 0.0000    |
| 8910.3861               | 7321.4393   | 332.4000   | -1588.9467  | 7394.3648 |
| 330.3287                | -58.1355    | -3.3080    | 664265.7895 | -13.3428  |
| -13.3369                |             |            |             |           |
| [45921]ENERGY: 11550000 | 3709.1033   | 5889.8306  | 5838.4562   |           |
| 365.9915                | -15362.2946 | -1934.1787 | 0.0000      | 0.0000    |
| 8817.3821               | 7324.2903   | 328.9305   | -1493.0917  | 7397.2497 |
| 330.4392                | -8.0988     | 18.5721    | 664265.7895 | -10.6535  |
| -10.6741                |             |            |             |           |
| [45957]ENERGY: 11560000 | 3642.1472   | 5911.6030  | 5863.9110   |           |
| 380.2613                | -15443.7974 | -1960.2611 | 0.0000      | 0.0000    |
| 8928.7269               | 7322.5907   | 333.0842   | -1606.1361  | 7395.3892 |
| 330.5146                | 101.9708    | 6.8881     | 664265.7895 | -7.3587   |
| -7.3497                 |             |            |             |           |
| [46007]ENERGY: 11570000 | 3627.3554   | 5819.3620  | 5942.8091   |           |
| 365.8416                | -15456.9074 | -1831.2295 | 0.0000      | 0.0000    |
| 8854.5294               | 7321.7606   | 330.3163   | -1532.7688  | 7395.5706 |
| 330.4159                | 215.4345    | 178.4081   | 664265.7895 | -10.5386  |
| -10.5402                |             |            |             |           |
| [46043]ENERGY: 11580000 | 3634.4262   | 5881.9108  | 5872.2036   |           |
| 347.7369                | -15288.6981 | -1938.1934 | 0.0000      | 0.0000    |
| 8815.5586               | 7324.9445   | 328.8625   | -1490.6141  | 7396.7745 |
| 330.5225                | -17.3509    | -62.6021   | 664265.7895 | -12.0385  |
| -12.0497                |             |            |             |           |
| [46093]ENERGY: 11590000 | 3553.0612   | 5930.3587  | 5971.5103   |           |
| 376.9394                | -15423.4397 | -1992.3009 | 0.0000      | 0.0000    |
| 8902.0647               | 7318.1937   | 332.0896   | -1583.8710  | 7393.9816 |
| 330.4275                | -68.7631    | -71.1966   | 664265.7895 | -10.6888  |
| -10.6719                |             |            |             |           |
| [46132]ENERGY: 11600000 | 3647.7251   | 5904.9134  | 5890.6037   |           |
| 363.1352                | -15406.9985 | -1880.7589 | 0.0000      | 0.0000    |
| 8806.6459               | 7325.2660   | 328.5300   | -1481.3800  | 7394.3540 |
| 330.1806                | 13.4468     | 30.2921    | 664265.7895 | -11.5473  |
| -11.5496                |             |            |             |           |
| [46182]ENERGY: 11610000 | 3620.6430   | 5770.6242  | 5910.6802   |           |
| 362.1168                | -15401.9103 | -1902.2230 | 0.0000      | 0.0000    |
| 8963.8962               | 7323.8270   | 334.3962   | -1640.0692  | 7394.0359 |
| 330.3104                | -145.3247   | -142.8894  | 664265.7895 | -12.0953  |
| -12.0885                |             |            |             |           |
| [46218]ENERGY: 11620000 | 3631.9062   | 5885.2599  | 5965.2168   |           |

## Supplementary Text 6

|                         |             |            |             |           |
|-------------------------|-------------|------------|-------------|-----------|
| 365.2396                | -15435.0645 | -1828.1924 | 0.0000      | 0.0000    |
| 8742.2476               | 7326.6132   | 326.1277   | -1415.6345  | 7394.5088 |
| 330.2449                | -77.1195    | -151.2059  | 664265.7895 | -10.6871  |
| -10.7045                |             |            |             |           |
| [46268]ENERGY: 11630000 | 3638.8237   | 5859.7984  | 5942.2142   |           |
| 357.8192                | -15384.3359 | -1893.7711 | 0.0000      | 0.0000    |
| 8799.4933               | 7320.0418   | 328.2632   | -1479.4515  | 7394.4714 |
| 330.3390                | -71.6190    | -56.0596   | 664265.7895 | -5.1685   |
| -5.1481                 |             |            |             |           |
| [46304]ENERGY: 11640000 | 3539.6106   | 5876.9600  | 5892.3941   |           |
| 376.9748                | -15370.8756 | -1859.5344 | 0.0000      | 0.0000    |
| 8866.3922               | 7321.9217   | 330.7588   | -1544.4704  | 7394.7499 |
| 330.6248                | 77.7376     | 117.9473   | 664265.7895 | -11.1151  |
| -11.1101                |             |            |             |           |
| [46354]ENERGY: 11650000 | 3555.5492   | 5914.3668  | 5894.5518   |           |
| 358.6964                | -15348.1157 | -1909.6254 | 0.0000      | 0.0000    |
| 8860.1054               | 7325.5285   | 330.5243   | -1534.5769  | 7397.5269 |
| 330.3313                | 64.1032     | -50.2765   | 664265.7895 | -14.8674  |
| -14.8781                |             |            |             |           |
| [46390]ENERGY: 11660000 | 3562.1071   | 5926.7715  | 5900.5334   |           |
| 392.8529                | -15490.7754 | -1800.0130 | 0.0000      | 0.0000    |
| 8830.4755               | 7321.9520   | 329.4190   | -1508.5235  | 7395.8587 |
| 330.3225                | 63.0732     | -11.0514   | 664265.7895 | -11.2973  |
| -11.3063                |             |            |             |           |
| [46440]ENERGY: 11670000 | 3670.0853   | 5772.3939  | 5905.5771   |           |
| 347.6596                | -15293.8015 | -1897.9675 | 0.0000      | 0.0000    |
| 8821.7030               | 7325.6500   | 329.0917   | -1496.0530  | 7397.1718 |
| 330.3158                | -34.1444    | -45.7759   | 664265.7895 | -8.1887   |
| -8.1780                 |             |            |             |           |
| [46476]ENERGY: 11680000 | 3668.5307   | 5910.7433  | 5907.4223   |           |
| 358.3623                | -15519.4996 | -1794.6811 | 0.0000      | 0.0000    |
| 8794.3160               | 7325.1939   | 328.0701   | -1469.1221  | 7398.2702 |
| 330.4341                | -65.2947    | -129.8452  | 664265.7895 | -11.4942  |
| -11.4850                |             |            |             |           |
| [46526]ENERGY: 11690000 | 3574.1052   | 5863.7864  | 5924.1461   |           |
| 363.7149                | -15366.0497 | -1873.5807 | 0.0000      | 0.0000    |
| 8842.4828               | 7328.6050   | 329.8669   | -1513.8778  | 7398.5051 |
| 330.5236                | 140.0056    | 41.7971    | 664265.7895 | -12.5471  |
| -12.5643                |             |            |             |           |
| [46565]ENERGY: 11700000 | 3789.8423   | 5841.9323  | 5888.1829   |           |
| 373.2766                | -15439.0819 | -1938.4587 | 0.0000      | 0.0000    |
| 8810.9345               | 7326.6281   | 328.6900   | -1484.3065  | 7397.4127 |
| 330.4696                | -160.7875   | -199.4730  | 664265.7895 | -8.4497   |
| -8.4291                 |             |            |             |           |
| [46615]ENERGY: 11710000 | 3615.2122   | 5766.4939  | 5952.9323   |           |
| 344.4314                | -15301.5214 | -1859.0844 | 0.0000      | 0.0000    |
| 8807.8143               | 7326.2782   | 328.5736   | -1481.5361  | 7397.5567 |
| 330.3159                | -28.4040    | -58.1846   | 664265.7895 | -6.2550   |
| -6.2701                 |             |            |             |           |
| [46651]ENERGY: 11720000 | 3671.9440   | 5872.6015  | 5855.1393   |           |
| 345.4874                | -15303.1928 | -1880.9911 | 0.0000      | 0.0000    |
| 8767.2532               | 7328.2415   | 327.0605   | -1439.0118  | 7398.6563 |
| 330.4072                | -159.9211   | -171.0488  | 664265.7895 | -10.2063  |
| -10.2245                |             |            |             |           |

## Supplementary Text 6

|                         |             |            |             |
|-------------------------|-------------|------------|-------------|
| [46701]ENERGY: 11730000 | 3608.3774   | 5830.6074  | 5945.8621   |
| 366.4356                | -15428.2967 | -1828.8114 | 0.0000      |
| 8833.0198               | 7327.1941   | 329.5139   | -1505.8257  |
| 330.1065                | 61.1757     | 82.6778    | 664265.7895 |
| -12.4858                |             |            | -12.5183    |
| [46737]ENERGY: 11740000 | 3594.5921   | 5826.2013  | 5922.7439   |
| 341.0871                | -15300.4208 | -1895.0721 | 0.0000      |
| 8839.1662               | 7328.2978   | 329.7432   | -1510.8685  |
| 330.1715                | 112.2995    | 63.1368    | 664265.7895 |
| -10.8197                |             |            | -10.8141    |
| [46787]ENERGY: 11750000 | 3700.7855   | 5915.6053  | 5904.1785   |
| 370.3564                | -15537.7258 | -1836.1396 | 0.0000      |
| 8812.2086               | 7329.2688   | 328.7375   | -1482.9397  |
| 330.2491                | 82.0270     | 8.1293     | 664265.7895 |
| -7.4416                 |             |            | -7.4550     |
| [46823]ENERGY: 11760000 | 3703.8323   | 5744.6324  | 5879.4390   |
| 354.0220                | -15336.6744 | -1850.0345 | 0.0000      |
| 8827.7447               | 7322.9615   | 329.3171   | -1504.7831  |
| 330.3710                | -80.9399    | -110.6764  | 664265.7895 |
| -12.5194                |             |            | -12.4946    |
| [46873]ENERGY: 11770000 | 3612.0655   | 5937.7518  | 5902.6749   |
| 353.0751                | -15342.9749 | -1904.3051 | 0.0000      |
| 8768.0101               | 7326.2974   | 327.0887   | -1441.7127  |
| 330.2478                | 5.6629      | 67.2097    | 664265.7895 |
| -12.7670                |             |            | -12.7750    |
| [46909]ENERGY: 11780000 | 3555.8004   | 5940.8444  | 5957.4225   |
| 348.8251                | -15396.8112 | -1874.8957 | 0.0000      |
| 8793.9902               | 7325.1757   | 328.0579   | -1468.8146  |
| 330.4372                | -115.3020   | -46.8071   | 664265.7895 |
| -11.8227                |             |            | -11.8154    |
| [46959]ENERGY: 11790000 | 3644.3798   | 5882.8939  | 5856.1017   |
| 374.2146                | -15348.5492 | -1904.2747 | 0.0000      |
| 8824.4176               | 7329.1836   | 329.1930   | -1495.2339  |
| 330.4696                | 15.2782     | -11.9661   | 664265.7895 |
| -11.7195                |             |            | -11.7275    |
| [46998]ENERGY: 11800000 | 3601.5437   | 5858.7794  | 5937.5247   |
| 360.6243                | -15393.2098 | -1820.7538 | 0.0000      |
| 8783.2577               | 7327.7662   | 327.6575   | -1455.4916  |
| 330.5682                | 107.5763    | 119.2208   | 664265.7895 |
| -11.8521                |             |            | -11.8617    |
| [47048]ENERGY: 11810000 | 3558.3048   | 5804.1043  | 5930.9395   |
| 373.5315                | -15339.0381 | -1865.1430 | 0.0000      |
| 8865.3587               | 7328.0576   | 330.7203   | -1537.3010  |
| 330.4765                | 50.9267     | 77.3389    | 664265.7895 |
| -11.5658                |             |            | -11.5523    |
| [47084]ENERGY: 11820000 | 3591.7188   | 5850.4506  | 5893.6564   |
| 345.0045                | -15402.9444 | -1857.3564 | 0.0000      |
| 8907.5409               | 7328.0702   | 332.2939   | -1579.4706  |
| 330.3739                | 136.6009    | 115.0885   | 664265.7895 |
| -12.0696                |             |            | -12.0630    |
| [47134]ENERGY: 11830000 | 3588.8861   | 5793.5406  | 5890.0459   |
| 373.1925                | -15375.3781 | -1849.5480 | 0.0000      |
| 8905.3582               | 7326.0972   | 332.2125   | -1579.2610  |
| 330.3889                | 48.6787     | 19.5891    | 664265.7895 |
|                         |             |            | -10.4760    |

Supplementary Text 6

-10.4732  
 [47170]ENERGY: 11840000      3639.1274      5745.4635      5970.2617  
 359.6492      -15468.6670      -1843.8447      0.0000      0.0000  
 8921.9654      7323.9555      332.8320      -1598.0099      7396.4863  
 330.2135      29.8187      -28.5938      664265.7895      -10.4503  
 -10.4441  
 [47220]ENERGY: 11850000      3679.1469      5777.3009      5950.9414  
 376.1635      -15422.6462      -1910.5815      0.0000      0.0000  
 8873.8248      7324.1498      331.0361      -1549.6750      7399.4943  
 330.5539      -12.4477      -55.1122      664265.7895      -12.1733  
 -12.1701  
 [47256]ENERGY: 11860000      3644.2599      5931.4327      5879.1776  
 369.2754      -15397.5867      -1900.4524      0.0000      0.0000  
 8806.6065      7332.7130      328.5286      -1473.8935      7400.1648  
 330.6758      174.8020      104.9477      664265.7895      -11.0869  
 -11.0916  
 [47306]ENERGY: 11870000      3676.0656      5845.4162      5920.7689  
 375.2169      -15524.6401      -1802.1305      0.0000      0.0000  
 8833.9209      7324.6178      329.5475      -1509.3031      7397.9220  
 330.5321      27.9641      87.9129      664265.7895      -11.3818  
 -11.3619  
 [47342]ENERGY: 11880000      3682.8681      5825.8396      5855.0146  
 378.4157      -15370.5239      -1851.8567      0.0000      0.0000  
 8809.6671      7329.4245      328.6427      -1480.2425      7400.3430  
 330.6523      -17.1405      -65.9518      664265.7895      -6.2391  
 -6.2722  
 [47392]ENERGY: 11890000      3666.8617      5803.4413      5915.8883  
 379.5300      -15413.8972      -1885.4252      0.0000      0.0000  
 8862.7290      7329.1279      330.6222      -1533.6011      7399.2447  
 330.4677      -200.1877      -145.0723      664265.7895      -8.9991  
 -8.9838  
 [47431]ENERGY: 11900000      3652.7503      5814.2233      5920.3364  
 390.0510      -15428.0984      -1845.7367      0.0000      0.0000  
 8827.9699      7331.4958      329.3255      -1496.4741      7399.0793  
 330.5635      -71.6910      -68.2877      664265.7895      -12.0462  
 -12.0426  
 [47481]ENERGY: 11910000      3620.9227      5800.2496      5955.4916  
 337.3079      -15445.3529      -1835.6197      0.0000      0.0000  
 8893.6568      7326.6559      331.7759      -1567.0009      7400.5913  
 330.4388      119.4976      -19.1003      664265.7895      -7.6296  
 -7.6421  
 [47517]ENERGY: 11920000      3656.6891      5808.9609      5936.6271  
 367.0229      -15391.8322      -1875.4435      0.0000      0.0000  
 8828.3687      7330.3931      329.3404      -1497.9757      7400.4748  
 330.5152      -20.5055      -46.6544      664265.7895      -6.0211  
 -6.0057  
 [47567]ENERGY: 11930000      3528.9001      5926.2150      5947.0238  
 354.3364      -15345.0807      -1913.3603      0.0000      0.0000  
 8833.2412      7331.2755      329.5222      -1501.9657      7401.8001  
 330.7167      -80.6892      -143.3974      664265.7895      -6.5228  
 -6.5303  
 [47603]ENERGY: 11940000      3631.2391      5846.0555      5903.0479  
 360.8810      -15322.4166      -1943.5111      0.0000      0.0000  
 8858.7786      7334.0744      330.4748      -1524.7041      7402.1093



## Supplementary Text 6

|                         |             |            |             |           |
|-------------------------|-------------|------------|-------------|-----------|
| 330.5475                | -45.9310    | -96.7224   | 664265.7895 | -8.0013   |
| -8.0090                 |             |            |             |           |
| [47653]ENERGY: 11950000 | 3575.3076   | 5742.5236  | 5868.1949   |           |
| 369.6967                | -15230.9723 | -1858.5671 | 0.0000      | 0.0000    |
| 8866.6604               | 7332.8437   | 330.7689   | -1533.8167  | 7402.4805 |
| 330.4530                | 39.5987     | 22.6662    | 664265.7895 | -10.3362  |
| -10.3372                |             |            |             |           |
| [47689]ENERGY: 11960000 | 3620.9394   | 5840.4108  | 5869.8787   |           |
| 369.3337                | -15392.8078 | -1877.8479 | 0.0000      | 0.0000    |
| 8899.8554               | 7329.7623   | 332.0072   | -1570.0931  | 7402.5041 |
| 330.4789                | -45.6518    | -146.2654  | 664265.7895 | -8.1692   |
| -8.1550                 |             |            |             |           |
| [47739]ENERGY: 11970000 | 3644.0304   | 5828.9961  | 5958.9749   |           |
| 364.8314                | -15424.4700 | -1859.9909 | 0.0000      | 0.0000    |
| 8819.4970               | 7331.8688   | 329.0094   | -1487.6282  | 7404.4321 |
| 330.5479                | 72.3865     | 65.7196    | 664265.7895 | -5.8634   |
| -5.8619                 |             |            |             |           |
| [47775]ENERGY: 11980000 | 3660.9527   | 5794.6151  | 5870.6637   |           |
| 360.5586                | -15373.8363 | -1811.1155 | 0.0000      | 0.0000    |
| 8830.2569               | 7332.0951   | 329.4108   | -1498.1618  | 7402.8926 |
| 330.1535                | 36.3211     | -3.0815    | 664265.7895 | -7.3885   |
| -7.3912                 |             |            |             |           |
| [47825]ENERGY: 11990000 | 3623.9655   | 5871.0356  | 5921.0799   |           |
| 363.5432                | -15316.5759 | -1899.8749 | 0.0000      | 0.0000    |
| 8771.5091               | 7334.6824   | 327.2193   | -1436.8267  | 7404.1752 |
| 330.2689                | 111.8817    | 10.0583    | 664265.7895 | -9.6589   |
| -9.6688                 |             |            |             |           |
| [47864]ENERGY: 12000000 | 3548.0086   | 5916.2641  | 5903.8213   |           |
| 368.6273                | -15432.0776 | -1813.4903 | 0.0000      | 0.0000    |
| 8841.0370               | 7332.1904   | 329.8130   | -1508.8466  | 7404.6467 |
| 330.2136                | 69.0215     | 53.2707    | 664265.7895 | -7.9479   |
| -7.9412                 |             |            |             |           |
| [47914]ENERGY: 12010000 | 3699.4965   | 5859.6216  | 5860.7728   |           |
| 382.4455                | -15289.4698 | -1872.6635 | 0.0000      | 0.0000    |
| 8696.6713               | 7336.8745   | 324.4274   | -1359.7968  | 7404.8383 |
| 330.3956                | 87.6851     | -55.9706   | 664265.7895 | -11.3537  |
| -11.3742                |             |            |             |           |
| [47950]ENERGY: 12020000 | 3788.5164   | 5816.5522  | 5920.8498   |           |
| 341.2750                | -15437.8903 | -1915.6563 | 0.0000      | 0.0000    |
| 8817.4936               | 7331.1404   | 328.9347   | -1486.3532  | 7402.9461 |
| 330.3307                | -107.4525   | -143.0283  | 664265.7895 | -11.1178  |
| -11.0986                |             |            |             |           |
| [48000]ENERGY: 12030000 | 3614.0195   | 5881.5049  | 5933.1578   |           |
| 362.6371                | -15429.8765 | -1900.7533 | 0.0000      | 0.0000    |
| 8866.4828               | 7327.1722   | 330.7622   | -1539.3106  | 7402.5677 |
| 330.5529                | -182.4118   | -196.9065  | 664265.7895 | -12.0486  |
| -12.0503                |             |            |             |           |
| [48036]ENERGY: 12040000 | 3561.3898   | 5808.8604  | 5929.6736   |           |
| 325.0204                | -15326.1740 | -1892.5542 | 0.0000      | 0.0000    |
| 8923.0659               | 7329.2819   | 332.8731   | -1593.7840  | 7403.6504 |
| 330.4432                | 27.0782     | -55.2101   | 664265.7895 | -11.4717  |
| -11.4576                |             |            |             |           |
| [48086]ENERGY: 12050000 | 3620.7953   | 5917.9684  | 5875.4535   |           |
| 348.6626                | -15457.5146 | -1792.0690 | 0.0000      | 0.0000    |

## Supplementary Text 6

|                         |             |            |             |           |
|-------------------------|-------------|------------|-------------|-----------|
| 8824.6682               | 7337.9645   | 329.2023   | -1486.7038  | 7404.0202 |
| 330.3708                | 218.7296    | 162.5082   | 664265.7895 | -12.5569  |
| -12.5684                |             |            |             |           |
| [48122]ENERGY: 12060000 | 3571.6817   | 5803.6513  | 5918.0851   |           |
| 352.6292                | -15390.6606 | -1825.4119 | 0.0000      | 0.0000    |
| 8897.1861               | 7327.1608   | 331.9076   | -1570.0253  | 7402.0584 |
| 330.5119                | 248.9341    | 152.4438   | 664265.7895 | -8.6831   |
| -8.6989                 |             |            |             |           |
| [48172]ENERGY: 12070000 | 3686.6826   | 5825.8905  | 5911.5412   |           |
| 371.0201                | -15444.4796 | -1894.7916 | 0.0000      | 0.0000    |
| 8878.1245               | 7333.9876   | 331.1965   | -1544.1369  | 7404.8911 |
| 330.1530                | -35.3647    | -83.9798   | 664265.7895 | -7.4376   |
| -7.4434                 |             |            |             |           |
| [48208]ENERGY: 12080000 | 3655.7054   | 5872.2947  | 5846.8680   |           |
| 388.9714                | -15380.6674 | -1770.8788 | 0.0000      | 0.0000    |
| 8722.6534               | 7334.9467   | 325.3967   | -1387.7067  | 7404.4445 |
| 330.1410                | 103.2061    | 69.0235    | 664265.7895 | -11.0757  |
| -11.0478                |             |            |             |           |
| [48258]ENERGY: 12090000 | 3630.9236   | 5803.8876  | 5941.6342   |           |
| 388.4584                | -15343.5006 | -1904.5708 | 0.0000      | 0.0000    |
| 8818.5196               | 7335.3519   | 328.9730   | -1483.1676  | 7404.6080 |
| 330.0632                | -158.2782   | -152.2107  | 664265.7895 | -10.9939  |
| -11.0110                |             |            |             |           |
| [48297]ENERGY: 12100000 | 3630.8288   | 5724.0154  | 5924.9201   |           |
| 380.9913                | -15379.9108 | -1835.6877 | 0.0000      | 0.0000    |
| 8889.7994               | 7334.9565   | 331.6321   | -1554.8430  | 7405.3497 |
| 330.2858                | -15.3962    | 9.3986     | 664265.7895 | -2.0586   |
| -2.0514                 |             |            |             |           |
| [48347]ENERGY: 12110000 | 3606.2909   | 5868.1358  | 5899.1787   |           |
| 343.5354                | -15330.0314 | -1880.7612 | 0.0000      | 0.0000    |
| 8824.0784               | 7330.4268   | 329.1803   | -1493.6517  | 7404.3014 |
| 330.3773                | 140.6483    | 93.3976    | 664265.7895 | -4.4450   |
| -4.4413                 |             |            |             |           |
| [48383]ENERGY: 12120000 | 3632.6800   | 5927.7907  | 5924.9415   |           |
| 377.9656                | -15452.8588 | -1884.2695 | 0.0000      | 0.0000    |
| 8809.6286               | 7335.8781   | 328.6413   | -1473.7505  | 7407.1305 |
| 330.4849                | -6.2219     | 35.6019    | 664265.7895 | -5.6284   |
| -5.6200                 |             |            |             |           |
| [48433]ENERGY: 12130000 | 3553.3056   | 5905.0767  | 5905.2646   |           |
| 360.6662                | -15416.2528 | -1860.5013 | 0.0000      | 0.0000    |
| 8885.8020               | 7333.3609   | 331.4829   | -1552.4411  | 7406.9423 |
| 330.4740                | 53.3002     | 49.8213    | 664265.7895 | -8.0779   |
| -8.0754                 |             |            |             |           |
| [48469]ENERGY: 12140000 | 3708.1974   | 5856.9342  | 5936.1871   |           |
| 354.0004                | -15485.8266 | -1847.1907 | 0.0000      | 0.0000    |
| 8815.8560               | 7338.1578   | 328.8736   | -1477.6982  | 7409.0138 |
| 330.5303                | -10.5460    | -83.6587   | 664265.7895 | -6.3390   |
| -6.3336                 |             |            |             |           |
| [48519]ENERGY: 12150000 | 3729.1656   | 5916.1812  | 5912.0695   |           |
| 374.5122                | -15480.4834 | -1838.6715 | 0.0000      | 0.0000    |
| 8728.0314               | 7340.8049   | 325.5973   | -1387.2265  | 7409.1300 |
| 330.7406                | 94.8392     | 54.3788    | 664265.7895 | -5.6024   |
| -5.6306                 |             |            |             |           |
| [48555]ENERGY: 12160000 | 3572.9216   | 5943.5239  | 5910.3675   |           |

## Supplementary Text 6

|                         |             |            |             |           |
|-------------------------|-------------|------------|-------------|-----------|
| 351.4222                | -15457.7841 | -1888.1329 | 0.0000      | 0.0000    |
| 8906.5982               | 7338.9164   | 332.2587   | -1567.6818  | 7409.9321 |
| 330.5556                | -15.5592    | -25.1743   | 664265.7895 | -7.3291   |
| -7.3116                 |             |            |             |           |
| [48605]ENERGY: 12170000 | 3577.0585   | 5894.0811  | 5877.7523   |           |
| 356.0001                | -15417.6009 | -1811.3794 | 0.0000      | 0.0000    |
| 8861.3497               | 7337.2614   | 330.5707   | -1524.0883  | 7409.3312 |
| 330.4205                | 31.9054     | 37.2834    | 664265.7895 | -9.2483   |
| -9.2450                 |             |            |             |           |
| [48641]ENERGY: 12180000 | 3676.3853   | 5872.5239  | 5899.7115   |           |
| 365.2637                | -15437.5012 | -1811.8619 | 0.0000      | 0.0000    |
| 8774.8522               | 7339.3733   | 327.3440   | -1435.4789  | 7409.3552 |
| 330.3169                | -61.6527    | -23.3232   | 664265.7895 | -9.8601   |
| -9.8504                 |             |            |             |           |
| [48691]ENERGY: 12190000 | 3644.7707   | 5812.0507  | 5900.3341   |           |
| 346.5386                | -15363.0141 | -1866.0283 | 0.0000      | 0.0000    |
| 8860.7212               | 7335.3729   | 330.5473   | -1525.3483  | 7408.6762 |
| 330.4213                | 8.9735      | -50.9880   | 664265.7895 | -7.4512   |
| -7.4795                 |             |            |             |           |
| [48730]ENERGY: 12200000 | 3572.7338   | 5912.1381  | 5865.4037   |           |
| 338.0113                | -15348.7959 | -1869.4584 | 0.0000      | 0.0000    |
| 8870.1196               | 7340.1522   | 330.8979   | -1529.9674  | 7408.6759 |
| 330.3573                | 152.2301    | 168.8609   | 664265.7895 | -8.9437   |
| -8.9206                 |             |            |             |           |
| [48780]ENERGY: 12210000 | 3567.5383   | 5976.6816  | 5844.7774   |           |
| 377.2343                | -15379.5853 | -1856.2588 | 0.0000      | 0.0000    |
| 8807.6796               | 7338.0672   | 328.5686   | -1469.6124  | 7410.6926 |
| 330.3938                | 39.5072     | 57.8435    | 664265.7895 | -11.0238  |
| -11.0423                |             |            |             |           |
| [48816]ENERGY: 12220000 | 3620.8631   | 5814.2910  | 5919.8409   |           |
| 366.1167                | -15389.4774 | -1857.0598 | 0.0000      | 0.0000    |
| 8862.9825               | 7337.5571   | 330.6317   | -1525.4254  | 7411.2877 |
| 330.3915                | -90.6956    | -117.2663  | 664265.7895 | -4.9193   |
| -4.9160                 |             |            |             |           |
| [48866]ENERGY: 12230000 | 3699.7230   | 5818.2696  | 5856.5459   |           |
| 363.5733                | -15372.3797 | -1851.4657 | 0.0000      | 0.0000    |
| 8826.6780               | 7340.9444   | 329.2773   | -1485.7336  | 7411.8689 |
| 330.4439                | -17.6236    | -14.5835   | 664265.7895 | -6.8974   |
| -6.9070                 |             |            |             |           |
| [48902]ENERGY: 12240000 | 3554.8914   | 5857.4314  | 5957.8295   |           |
| 368.4339                | -15479.3885 | -1820.8961 | 0.0000      | 0.0000    |
| 8897.9000               | 7336.2016   | 331.9342   | -1561.6983  | 7410.9764 |
| 330.5210                | 98.6850     | 32.7683    | 664265.7895 | -8.1609   |
| -8.1635                 |             |            |             |           |
| [48952]ENERGY: 12250000 | 3663.2094   | 5862.0663  | 5864.8040   |           |
| 356.3420                | -15372.9770 | -1828.7639 | 0.0000      | 0.0000    |
| 8794.6287               | 7339.3094   | 328.0817   | -1455.3192  | 7410.3916 |
| 330.6739                | 14.6249     | 27.9803    | 664265.7895 | -10.1437  |
| -10.1185                |             |            |             |           |
| [48988]ENERGY: 12260000 | 3579.8701   | 5819.0166  | 6026.9455   |           |
| 398.0424                | -15467.0605 | -1818.3632 | 0.0000      | 0.0000    |
| 8802.6070               | 7341.0579   | 328.3794   | -1461.5492  | 7412.1518 |
| 330.5233                | 50.5462     | -79.0924   | 664265.7895 | -7.8637   |
| -7.8796                 |             |            |             |           |

## Supplementary Text 6

|                         |             |            |             |
|-------------------------|-------------|------------|-------------|
| [49038]ENERGY: 12270000 | 3626.0370   | 5888.8486  | 5927.6114   |
| 360.3764                | -15353.0912 | -1891.1557 | 0.0000      |
| 8785.2269               | 7343.8534   | 327.7310   | -1441.3735  |
| 330.5889                | -16.4888    | -29.3747   | 664265.7895 |
| -4.8020                 |             |            | -4.8061     |
| [49074]ENERGY: 12280000 | 3649.7225   | 5857.0438  | 5903.6671   |
| 351.2892                | -15395.7329 | -1836.2188 | 0.0000      |
| 8812.6358               | 7342.4068   | 328.7535   | -1470.2290  |
| 330.7498                | -8.6985     | 0.5651     | 664265.7895 |
| -3.6638                 |             |            | -3.6454     |
| [49124]ENERGY: 12290000 | 3623.9037   | 5826.5276  | 5911.5907   |
| 373.4858                | -15406.6327 | -1788.2200 | 0.0000      |
| 8803.3350               | 7343.9902   | 328.4065   | -1459.3448  |
| 330.7361                | 162.0466    | 110.6125   | 664265.7895 |
| -0.8988                 |             |            | -0.8969     |
| [49163]ENERGY: 12300000 | 3633.5779   | 5809.9880  | 5930.3537   |
| 356.2356                | -15485.2526 | -1808.4472 | 0.0000      |
| 8903.8356               | 7340.2908   | 332.1557   | -1563.5448  |
| 330.6052                | 41.1115     | 42.9913    | 664265.7895 |
| -3.3103                 |             |            | -3.3392     |
| [49213]ENERGY: 12310000 | 3592.2678   | 5910.8591  | 5874.1351   |
| 364.4450                | -15385.9403 | -1941.2279 | 0.0000      |
| 8930.8641               | 7345.4029   | 333.1640   | -1585.4612  |
| 330.8159                | -50.2720    | -72.2206   | 664265.7895 |
| -5.2478                 |             |            | -5.2415     |
| [49249]ENERGY: 12320000 | 3633.0368   | 5867.7194  | 5906.7801   |
| 348.8586                | -15363.5066 | -1904.8221 | 0.0000      |
| 8856.8722               | 7344.9384   | 330.4037   | -1511.9338  |
| 330.6115                | -67.6455    | -166.0245  | 664265.7895 |
| -6.8300                 |             |            | -6.8158     |
| [49299]ENERGY: 12330000 | 3624.0562   | 5863.1819  | 5916.6762   |
| 387.4263                | -15519.3378 | -1789.5156 | 0.0000      |
| 8862.2830               | 7344.7703   | 330.6056   | -1517.5127  |
| 330.4245                | -88.2504    | -74.0412   | 664265.7895 |
| -8.5730                 |             |            | -8.5776     |
| [49335]ENERGY: 12340000 | 3598.9667   | 5893.4736  | 5959.2026   |
| 346.7403                | -15410.6169 | -1804.1371 | 0.0000      |
| 8766.6097               | 7350.2389   | 327.0365   | -1416.3709  |
| 330.6779                | -40.1814    | -58.7387   | 664265.7895 |
| -4.6480                 |             |            | -4.6401     |
| [49385]ENERGY: 12350000 | 3741.4033   | 5818.8646  | 5894.4053   |
| 361.9240                | -15406.7904 | -1839.6843 | 0.0000      |
| 8774.8064               | 7344.9290   | 327.3423   | -1429.8774  |
| 330.6600                | -7.2152     | -37.2453   | 664265.7895 |
| -7.1367                 |             |            | -7.1555     |
| [49421]ENERGY: 12360000 | 3674.8781   | 5775.6557  | 5911.5656   |
| 350.7999                | -15335.5486 | -1929.6031 | 0.0000      |
| 8896.7674               | 7344.5151   | 331.8920   | -1552.2524  |
| 330.8180                | -229.3214   | -186.7451  | 664265.7895 |
| -9.2770                 |             |            | -9.2886     |
| [49471]ENERGY: 12370000 | 3673.4131   | 5858.3605  | 5876.4707   |
| 348.8401                | -15333.2620 | -1920.1405 | 0.0000      |
| 8840.5914               | 7344.2732   | 329.7964   | -1496.3182  |
| 330.5349                | -139.4003   | -159.3969  | 664265.7895 |
|                         |             |            | -5.2702     |

Supplementary Text 6

-5.2727  
 [49507]ENERGY: 12380000      3623.4675      5848.2696      5960.9006  
 373.6940      -15335.1499      -1897.4939      0.0000      0.0000  
 8774.5762      7348.2640      327.3337      -1426.3122      7418.6339  
 330.5622      -36.5267      -28.8080      664265.7895      -5.8974  
 -5.9094  
 [49557]ENERGY: 12390000      3586.8735      5813.9085      5908.7613  
 376.8414      -15400.5015      -1787.7503      0.0000      0.0000  
 8846.4025      7344.5353      330.0131      -1501.8672      7419.1734  
 330.5721      264.7815      225.0194      664265.7895      -6.7375  
 -6.7476  
 [49596]ENERGY: 12400000      3699.0365      5770.3128      5988.5955  
 383.3714      -15488.3976      -1818.2749      0.0000      0.0000  
 8810.1820      7344.8256      328.6619      -1465.3564      7418.4227  
 330.5270      -68.7928      -144.7537      664265.7895      -5.9127  
 -5.9046  
 [49646]ENERGY: 12410000      3617.9205      5847.5319      5929.1464  
 353.3469      -15482.8721      -1833.7489      0.0000      0.0000  
 8911.2686      7342.5932      332.4330      -1568.6754      7419.7534  
 330.5731      25.6170      -54.6435      664265.7895      -6.0395  
 -6.0242  
 [49682]ENERGY: 12420000      3608.3408      5831.7160      5884.7265  
 370.3370      -15369.1033      -1834.3194      0.0000      0.0000  
 8857.5162      7349.2137      330.4277      -1508.3025      7419.9655  
 330.6679      132.8428      81.2357      664265.7895      -9.3299  
 -9.3533  
 [49732]ENERGY: 12430000      3606.2506      6030.9653      5931.8433  
 356.4877      -15508.6305      -1880.6776      0.0000      0.0000  
 8813.4031      7349.6419      328.7821      -1463.7612      7419.9280  
 330.7573      127.2122      108.9163      664265.7895      -8.0135  
 -8.0035  
 [49768]ENERGY: 12440000      3648.7265      5839.1433      5906.8010  
 367.9198      -15420.2902      -1901.1320      0.0000      0.0000  
 8909.3545      7350.5231      332.3616      -1558.8314      7421.4316  
 330.5538      -40.8521      -24.9446      664265.7895      -5.9467  
 -5.9419  
 [49818]ENERGY: 12450000      3738.3080      5855.8537      5913.1513  
 382.0477      -15458.8989      -1839.1333      0.0000      0.0000  
 8765.1692      7356.4977      326.9827      -1408.6715      7422.6984  
 330.5932      94.8574      -24.4365      664265.7895      -9.9682  
 -9.9586  
 [49854]ENERGY: 12460000      3614.7588      5864.4514      5892.4440  
 356.6355      -15473.5647      -1816.6385      0.0000      0.0000  
 8905.5878      7343.6742      332.2210      -1561.9135      7421.2267  
 330.8289      110.2712      100.1138      664265.7895      -11.0754  
 -11.0980  
 [49904]ENERGY: 12470000      3610.9572      5822.5858      5906.1059  
 350.4752      -15318.7716      -1922.4133      0.0000      0.0000  
 8902.6371      7351.5763      332.1110      -1551.0608      7422.7772  
 330.7525      -101.5688      -160.4230      664265.7895      -7.1434  
 -7.1246  
 [49940]ENERGY: 12480000      3602.9703      5868.2591      5949.6019  
 374.4318      -15500.3826      -1869.6192      0.0000      0.0000  
 8921.6237      7346.8850      332.8193      -1574.7387      7422.6435

## Supplementary Text 6

|                         |             |            |             |           |
|-------------------------|-------------|------------|-------------|-----------|
| 330.6678                | -27.4895    | -139.1732  | 664265.7895 | -11.8698  |
| -11.8840                |             |            |             |           |
| [49990]ENERGY: 12490000 | 3588.1069   | 5886.3209  | 5882.0758   |           |
| 367.9216                | -15391.1799 | -1789.3425 | 0.0000      | 0.0000    |
| 8811.2817               | 7355.1846   | 328.7030   | -1456.0972  | 7422.6757 |
| 330.5300                | 182.7560    | 137.0779   | 664265.7895 | -13.1347  |
| -13.1581                |             |            |             |           |
| [50029]ENERGY: 12500000 | 3626.3172   | 5836.1616  | 5918.3549   |           |
| 343.6223                | -15429.3395 | -1841.3482 | 0.0000      | 0.0000    |
| 8894.9733               | 7348.7416   | 331.8251   | -1546.2317  | 7420.9868 |
| 330.7397                | -1.2974     | -24.9367   | 664265.7895 | -7.5326   |
| -7.4991                 |             |            |             |           |
| [50079]ENERGY: 12510000 | 3624.9209   | 5798.3826  | 5907.4083   |           |
| 345.9846                | -15370.0838 | -1885.7027 | 0.0000      | 0.0000    |
| 8927.5422               | 7348.4521   | 333.0400   | -1579.0902  | 7421.4716 |
| 330.8881                | -165.2324   | -160.9375  | 664265.7895 | -8.8762   |
| -8.8848                 |             |            |             |           |
| [50115]ENERGY: 12520000 | 3601.1586   | 5772.9636  | 5935.5792   |           |
| 371.1670                | -15370.4654 | -1819.5376 | 0.0000      | 0.0000    |
| 8861.6526               | 7352.5180   | 330.5820   | -1509.1346  | 7422.2384 |
| 330.6747                | -3.2416     | 54.1483    | 664265.7895 | -8.7877   |
| -8.7885                 |             |            |             |           |
| [50165]ENERGY: 12530000 | 3612.3562   | 5840.8668  | 5917.5810   |           |
| 325.9451                | -15267.8210 | -1954.3078 | 0.0000      | 0.0000    |
| 8875.7386               | 7350.3588   | 331.1075   | -1525.3798  | 7422.9192 |
| 330.7301                | 50.4785     | -1.5099    | 664265.7895 | -8.4701   |
| -8.5005                 |             |            |             |           |
| [50201]ENERGY: 12540000 | 3681.8368   | 5821.9372  | 5904.2885   |           |
| 391.8739                | -15339.5226 | -1985.0259 | 0.0000      | 0.0000    |
| 8869.9653               | 7345.3533   | 330.8921   | -1524.6121  | 7423.2581 |
| 330.7771                | -189.4283   | -207.7133  | 664265.7895 | -11.7878  |
| -11.7411                |             |            |             |           |
| [50251]ENERGY: 12550000 | 3616.2659   | 5780.3059  | 5901.8957   |           |
| 359.4276                | -15331.3087 | -1901.4970 | 0.0000      | 0.0000    |
| 8922.7644               | 7347.8538   | 332.8618   | -1574.9106  | 7421.4062 |
| 330.9215                | -73.4045    | -154.2179  | 664265.7895 | -8.8104   |
| -8.8287                 |             |            |             |           |
| [50287]ENERGY: 12560000 | 3688.4838   | 5858.8143  | 5935.3282   |           |
| 375.7789                | -15452.8926 | -1901.3851 | 0.0000      | 0.0000    |
| 8844.9556               | 7349.0832   | 329.9592   | -1495.8724  | 7421.0399 |
| 330.7310                | -8.1619     | -53.6042   | 664265.7895 | -12.1996  |
| -12.1997                |             |            |             |           |
| [50337]ENERGY: 12570000 | 3680.2667   | 5849.6034  | 5880.4732   |           |
| 366.3131                | -15306.3334 | -1930.1808 | 0.0000      | 0.0000    |
| 8813.3004               | 7353.4426   | 328.7783   | -1459.8577  | 7421.4104 |
| 330.6309                | 22.5341     | -36.8192   | 664265.7895 | -7.2127   |
| -7.2042                 |             |            |             |           |
| [50373]ENERGY: 12580000 | 3613.6423   | 5803.2142  | 5883.9524   |           |
| 361.3776                | -15370.9042 | -1883.1221 | 0.0000      | 0.0000    |
| 8943.8044               | 7351.9645   | 333.6467   | -1591.8399  | 7422.1641 |
| 330.6488                | 10.9745     | 18.3061    | 664265.7895 | -11.1840  |
| -11.1947                |             |            |             |           |
| [50423]ENERGY: 12590000 | 3605.7517   | 5813.8262  | 5957.0895   |           |
| 373.6354                | -15402.5176 | -1842.0146 | 0.0000      | 0.0000    |

## Supplementary Text 6

|                         |             |            |             |           |
|-------------------------|-------------|------------|-------------|-----------|
| 8848.2714               | 7354.0420   | 330.0829   | -1494.2294  | 7421.3352 |
| 330.5551                | -16.3795    | -16.9170   | 664265.7895 | -13.0151  |
| -13.0026                |             |            |             |           |
| [50462]ENERGY: 12600000 | 3645.0059   | 5856.3893  | 5903.1906   |           |
| 366.7873                | -15462.0737 | -1830.6026 | 0.0000      | 0.0000    |
| 8873.3720               | 7352.0687   | 331.0192   | -1521.3033  | 7422.1776 |
| 330.9712                | -85.3370    | -49.6986   | 664265.7895 | -8.9292   |
| -8.9298                 |             |            |             |           |
| [50512]ENERGY: 12610000 | 3645.2734   | 5810.5387  | 5915.7625   |           |
| 354.7428                | -15366.7823 | -1907.0448 | 0.0000      | 0.0000    |
| 8900.5003               | 7352.9906   | 332.0312   | -1547.5097  | 7424.2319 |
| 331.0284                | -134.5821   | -117.9702  | 664265.7895 | -9.8155   |
| -9.8158                 |             |            |             |           |
| [50548]ENERGY: 12620000 | 3649.9214   | 5887.9369  | 5890.7854   |           |
| 343.6690                | -15363.4673 | -1922.6560 | 0.0000      | 0.0000    |
| 8865.8392               | 7352.0287   | 330.7382   | -1513.8106  | 7423.8368 |
| 330.8540                | -96.1743    | -101.5591  | 664265.7895 | -8.1915   |
| -8.2017                 |             |            |             |           |
| [50598]ENERGY: 12630000 | 3627.9136   | 5855.9475  | 5954.4426   |           |
| 349.0246                | -15399.9067 | -1885.2148 | 0.0000      | 0.0000    |
| 8850.8112               | 7353.0180   | 330.1776   | -1497.7932  | 7423.7254 |
| 331.0364                | -54.8389    | -50.4368   | 664265.7895 | -9.6858   |
| -9.7033                 |             |            |             |           |
| [50634]ENERGY: 12640000 | 3612.4177   | 5774.5868  | 5924.5989   |           |
| 362.2840                | -15448.4126 | -1731.8162 | 0.0000      | 0.0000    |
| 8856.0292               | 7349.6880   | 330.3723   | -1506.3412  | 7423.2616 |
| 331.0388                | 185.1488    | 163.2334   | 664265.7895 | -7.1388   |
| -7.1113                 |             |            |             |           |
| [50684]ENERGY: 12650000 | 3700.8732   | 5779.9133  | 5917.3496   |           |
| 355.7888                | -15390.1438 | -1855.1474 | 0.0000      | 0.0000    |
| 8838.7364               | 7347.3702   | 329.7272   | -1491.3662  | 7423.1553 |
| 330.9184                | -61.9895    | -36.0264   | 664265.7895 | -9.2215   |
| -9.2296                 |             |            |             |           |
| [50720]ENERGY: 12660000 | 3665.7138   | 5829.9584  | 5964.0150   |           |
| 373.0500                | -15540.8100 | -1817.4437 | 0.0000      | 0.0000    |
| 8876.5013               | 7350.9848   | 331.1360   | -1525.5165  | 7424.5905 |
| 330.8757                | -18.0597    | 60.2296    | 664265.7895 | -9.6151   |
| -9.6111                 |             |            |             |           |
| [50770]ENERGY: 12670000 | 3636.2651   | 5840.0036  | 5884.9717   |           |
| 349.6456                | -15435.4781 | -1848.8133 | 0.0000      | 0.0000    |
| 8923.3425               | 7349.9371   | 332.8834   | -1573.4054  | 7422.8544 |
| 331.0436                | 162.9238    | 138.7778   | 664265.7895 | -9.0843   |
| -9.0940                 |             |            |             |           |
| [50806]ENERGY: 12680000 | 3721.8278   | 5852.4865  | 5871.1440   |           |
| 376.4506                | -15452.9578 | -1818.0549 | 0.0000      | 0.0000    |
| 8802.5538               | 7353.4499   | 328.3774   | -1449.1039  | 7424.2684 |
| 330.9330                | 67.4667     | 14.1303    | 664265.7895 | -4.1360   |
| -4.1479                 |             |            |             |           |
| [50856]ENERGY: 12690000 | 3609.6153   | 5802.6698  | 5982.8934   |           |
| 357.2442                | -15492.1160 | -1889.3024 | 0.0000      | 0.0000    |
| 8980.9575               | 7351.9619   | 335.0327   | -1628.9957  | 7423.9796 |
| 331.0771                | 64.8367     | 1.1278     | 664265.7895 | -9.8942   |
| -9.8685                 |             |            |             |           |
| [50895]ENERGY: 12700000 | 3598.3648   | 5790.5489  | 5917.1952   |           |

## Supplementary Text 6

|                         |             |            |             |           |
|-------------------------|-------------|------------|-------------|-----------|
| 339.2782                | -15376.8637 | -1856.5056 | 0.0000      | 0.0000    |
| 8940.8384               | 7352.8562   | 333.5361   | -1587.9823  | 7424.5705 |
| 330.9632                | 132.0094    | 13.0327    | 664265.7895 | -3.4580   |
| -3.4787                 |             |            |             |           |
| [50945]ENERGY: 12710000 | 3660.3142   | 5778.7495  | 5954.9150   |           |
| 350.4166                | -15515.0057 | -1777.2131 | 0.0000      | 0.0000    |
| 8902.1360               | 7354.3126   | 332.0923   | -1547.8233  | 7423.9269 |
| 331.0352                | 36.0606     | -7.4625    | 664265.7895 | -8.8051   |
| -8.8069                 |             |            |             |           |
| [50981]ENERGY: 12720000 | 3676.6841   | 5921.4478  | 5941.8538   |           |
| 382.0027                | -15472.0549 | -1824.9861 | 0.0000      | 0.0000    |
| 8731.1044               | 7356.0519   | 325.7120   | -1375.0526  | 7424.5238 |
| 330.9792                | 43.3886     | 30.6574    | 664265.7895 | -7.7852   |
| -7.7774                 |             |            |             |           |
| [51031]ENERGY: 12730000 | 3560.5290   | 5891.6218  | 5924.4416   |           |
| 401.6608                | -15342.7681 | -1894.5799 | 0.0000      | 0.0000    |
| 8814.6973               | 7355.6024   | 328.8304   | -1459.0949  | 7425.3830 |
| 331.1151                | 101.8481    | 102.9550   | 664265.7895 | -11.1382  |
| -11.1287                |             |            |             |           |
| [51067]ENERGY: 12740000 | 3540.4333   | 5876.8345  | 5897.7127   |           |
| 359.4271                | -15443.0550 | -1834.1932 | 0.0000      | 0.0000    |
| 8957.0542               | 7354.2136   | 334.1410   | -1602.8406  | 7426.2906 |
| 331.1036                | 23.3810     | 61.7834    | 664265.7895 | -4.5765   |
| -4.5803                 |             |            |             |           |
| [51117]ENERGY: 12750000 | 3659.5098   | 5880.7154  | 5906.3455   |           |
| 378.8921                | -15385.2708 | -1946.9281 | 0.0000      | 0.0000    |
| 8858.6992               | 7351.9630   | 330.4719   | -1506.7362  | 7427.6240 |
| 331.0853                | -50.2887    | -49.1844   | 664265.7895 | -4.1707   |
| -4.1716                 |             |            |             |           |
| [51153]ENERGY: 12760000 | 3597.3528   | 5888.6770  | 5906.7885   |           |
| 383.0311                | -15354.3379 | -1855.0051 | 0.0000      | 0.0000    |
| 8791.7609               | 7358.2673   | 327.9747   | -1433.4936  | 7426.9607 |
| 331.1758                | 138.6872    | 127.7339   | 664265.7895 | -8.0290   |
| -8.0385                 |             |            |             |           |
| [51203]ENERGY: 12770000 | 3631.7751   | 5927.7137  | 5891.6659   |           |
| 356.0597                | -15441.7309 | -1893.3002 | 0.0000      | 0.0000    |
| 8883.5253               | 7355.7086   | 331.3980   | -1527.8167  | 7426.7845 |
| 330.9862                | -116.9235   | 46.1514    | 664265.7895 | -7.6172   |
| -7.5979                 |             |            |             |           |
| [51239]ENERGY: 12780000 | 3603.9708   | 5775.5456  | 5923.0013   |           |
| 380.0812                | -15352.7030 | -1853.7488 | 0.0000      | 0.0000    |
| 8881.7292               | 7357.8763   | 331.3310   | -1523.8529  | 7427.6784 |
| 331.0196                | 26.0231     | -43.0863   | 664265.7895 | -6.8138   |
| -6.8153                 |             |            |             |           |
| [51289]ENERGY: 12790000 | 3588.9886   | 5964.7558  | 5924.9215   |           |
| 351.4961                | -15376.0149 | -1938.2353 | 0.0000      | 0.0000    |
| 8839.4163               | 7355.3280   | 329.7525   | -1484.0883  | 7428.3943 |
| 330.9662                | -33.3211    | -117.6609  | 664265.7895 | -5.7584   |
| -5.7664                 |             |            |             |           |
| [51328]ENERGY: 12800000 | 3629.2016   | 5804.6089  | 5901.2610   |           |
| 370.9878                | -15383.2195 | -1855.3915 | 0.0000      | 0.0000    |
| 8888.5390               | 7355.9874   | 331.5850   | -1532.5516  | 7429.0222 |
| 331.0560                | -44.9425    | -67.2935   | 664265.7895 | -8.5835   |
| -8.5827                 |             |            |             |           |



## Supplementary Text 6

|                         |             |            |             |           |
|-------------------------|-------------|------------|-------------|-----------|
| [51378]ENERGY: 12810000 | 3638.8285   | 5894.3558  | 5920.6972   |           |
| 345.6047                | -15349.2953 | -1929.5273 | 0.0000      | 0.0000    |
| 8836.8250               | 7357.4887   | 329.6559   | -1479.3363  | 7429.1883 |
| 331.0112                | -13.0353    | -57.1917   | 664265.7895 | -5.6328   |
| -5.6458                 |             |            |             |           |
| [51414]ENERGY: 12820000 | 3626.6914   | 5826.6910  | 5915.3714   |           |
| 383.8900                | -15359.0605 | -1844.2832 | 0.0000      | 0.0000    |
| 8808.3021               | 7357.6021   | 328.5918   | -1450.7000  | 7427.0119 |
| 330.9150                | -35.8236    | -22.1086   | 664265.7895 | -8.6677   |
| -8.6513                 |             |            |             |           |
| [51464]ENERGY: 12830000 | 3709.5413   | 5795.7591  | 5943.6883   |           |
| 348.1683                | -15316.5457 | -1971.0808 | 0.0000      | 0.0000    |
| 8849.1369               | 7358.6675   | 330.1151   | -1490.4694  | 7428.7323 |
| 331.0386                | -257.6080   | -146.8523  | 664265.7895 | -4.1053   |
| -4.1111                 |             |            |             |           |
| [51500]ENERGY: 12840000 | 3615.7104   | 5767.2396  | 5893.6691   |           |
| 389.3171                | -15419.7899 | -1824.6092 | 0.0000      | 0.0000    |
| 8938.1997               | 7359.7369   | 333.4376   | -1578.4628  | 7429.7002 |
| 331.0102                | 41.5565     | -92.1611   | 664265.7895 | -7.3497   |
| -7.3615                 |             |            |             |           |
| [51550]ENERGY: 12850000 | 3614.9480   | 5912.5335  | 5946.6285   |           |
| 372.7232                | -15360.4812 | -1883.7575 | 0.0000      | 0.0000    |
| 8754.8470               | 7357.4415   | 326.5977   | -1397.4055  | 7429.4502 |
| 330.9315                | -39.5040    | 46.5240    | 664265.7895 | -5.5327   |
| -5.5216                 |             |            |             |           |
| [51586]ENERGY: 12860000 | 3572.4806   | 5892.2674  | 5889.5252   |           |
| 383.8040                | -15388.5158 | -1842.6341 | 0.0000      | 0.0000    |
| 8850.9612               | 7357.8885   | 330.1832   | -1493.0728  | 7430.7388 |
| 331.0557                | 53.0339     | 13.7126    | 664265.7895 | -2.7723   |
| -2.7818                 |             |            |             |           |
| [51636]ENERGY: 12870000 | 3575.5369   | 5859.1919  | 5959.4238   |           |
| 367.5656                | -15382.2327 | -1853.5454 | 0.0000      | 0.0000    |
| 8830.2126               | 7356.1528   | 329.4092   | -1474.0598  | 7429.2077 |
| 331.0388                | -13.8096    | -43.4393   | 664265.7895 | -3.5054   |
| -3.4858                 |             |            |             |           |
| [51672]ENERGY: 12880000 | 3561.3092   | 5928.8217  | 5934.7970   |           |
| 376.4497                | -15418.4338 | -1839.6973 | 0.0000      | 0.0000    |
| 8818.3801               | 7361.6266   | 328.9678   | -1456.7534  | 7430.1187 |
| 331.1070                | 68.8917     | 5.8531     | 664265.7895 | -7.4580   |
| -7.4734                 |             |            |             |           |
| [51722]ENERGY: 12890000 | 3646.7807   | 5929.5006  | 5931.7271   |           |
| 365.5417                | -15439.6967 | -1913.4181 | 0.0000      | 0.0000    |
| 8837.8014               | 7358.2367   | 329.6923   | -1479.5647  | 7431.0579 |
| 331.3465                | -63.2264    | 59.3011    | 664265.7895 | -8.7777   |
| -8.7685                 |             |            |             |           |
| [51761]ENERGY: 12900000 | 3677.2670   | 5814.4558  | 5904.4857   |           |
| 361.2455                | -15370.3517 | -1851.5031 | 0.0000      | 0.0000    |
| 8826.6527               | 7362.2519   | 329.2764   | -1464.4008  | 7431.6308 |
| 331.3321                | 121.2449    | 47.6317    | 664265.7895 | -8.5051   |
| -8.5079                 |             |            |             |           |
| [51811]ENERGY: 12910000 | 3590.4388   | 5906.1718  | 5914.4947   |           |
| 371.3154                | -15443.9415 | -1899.2146 | 0.0000      | 0.0000    |
| 8916.5003               | 7355.7648   | 332.6281   | -1560.7355  | 7429.7753 |
| 331.3060                | -91.9378    | -149.5810  | 664265.7895 | -8.6742   |

Supplementary Text 6

-8.6743  
 [51847]ENERGY: 12920000 3630.0780 5825.8003 5926.7793  
 360.5494 -15452.0585 -1852.7363 0.0000 0.0000  
 8920.1438 7358.5560 332.7640 -1561.5878 7429.4368  
 331.1002 67.3652 91.2177 664265.7895 -7.9093  
 -7.9011  
 [51897]ENERGY: 12930000 3550.2343 5895.6270 5846.1634  
 352.8224 -15306.7679 -1898.1521 0.0000 0.0000  
 8920.0437 7359.9707 332.7603 -1560.0730 7430.1635  
 330.9423 86.3506 102.4773 664265.7895 -10.1177  
 -10.1328  
 [51933]ENERGY: 12940000 3603.7034 5896.0460 5943.0360  
 363.8203 -15326.9148 -1905.0812 0.0000 0.0000  
 8785.7310 7360.3406 327.7498 -1425.3904 7431.5114  
 330.8557 -70.7046 -138.0823 664265.7895 -4.0970  
 -4.0901  
 [51983]ENERGY: 12950000 3660.3658 5882.9433 5917.8338  
 368.6380 -15427.9706 -1858.4238 0.0000 0.0000  
 8819.5106 7362.8971 329.0099 -1456.6135 7432.3503  
 331.0315 52.1208 -44.0985 664265.7895 -4.8520  
 -4.8618  
 [52019]ENERGY: 12960000 3627.9964 5837.6136 5906.9342  
 376.4305 -15436.3783 -1766.0979 0.0000 0.0000  
 8814.3829 7360.8813 328.8187 -1453.5016 7430.2302  
 330.9695 -2.1792 10.3915 664265.7895 0.5672  
 0.5772  
 [52069]ENERGY: 12970000 3636.1684 5844.6319 5904.1018  
 361.9412 -15388.2793 -1880.8121 0.0000 0.0000  
 8878.6483 7356.4002 331.2161 -1522.2481 7430.6255  
 330.9564 73.9455 -5.2123 664265.7895 -3.3413  
 -3.3589  
 [52105]ENERGY: 12980000 3648.3847 5839.4502 5894.6101  
 353.9069 -15329.0604 -1924.8168 0.0000 0.0000  
 8880.4757 7362.9502 331.2842 -1517.5254 7430.3662  
 330.9420 -100.0074 -123.1930 664265.7895 -0.8727  
 -0.8597  
 [52155]ENERGY: 12990000 3662.9759 5917.2911 5955.8112  
 372.6476 -15474.4032 -1880.6834 0.0000 0.0000  
 8805.8165 7359.4557 328.4991 -1446.3608 7429.9239  
 331.0855 78.3010 26.0786 664265.7895 -4.1796  
 -4.1744  
 [52194]ENERGY: 13000000 3707.5367 5899.1344 5940.7239  
 375.4513 -15547.4708 -1840.7034 0.0000 0.0000  
 8827.3160 7361.9881 329.3011 -1465.3279 7431.6083  
 331.1828 22.4916 -14.6614 664265.7895 -0.9246  
 -0.9302  
 [52244]ENERGY: 13010000 3683.1825 5830.4428 5945.6905  
 360.8825 -15470.1653 -1902.7466 0.0000 0.0000  
 8912.8456 7360.1321 332.4918 -1552.7135 7431.8114  
 331.0126 -3.4261 2.8746 664265.7895 -1.4344  
 -1.4262  
 [52280]ENERGY: 13020000 3566.6624 5987.3492 5903.8256  
 356.4849 -15379.4653 -1874.0280 0.0000 0.0000  
 8798.3426 7359.1713 328.2203 -1439.1712 7431.5351

## Supplementary Text 6

|                         |             |            |             |           |
|-------------------------|-------------|------------|-------------|-----------|
| 330.8416                | 105.9416    | 75.9392    | 664265.7895 | -7.1578   |
| -7.1588                 |             |            |             |           |
| [52330]ENERGY: 13030000 | 3732.3171   | 5818.0209  | 5932.2056   |           |
| 353.3266                | -15414.8296 | -1843.5963 | 0.0000      | 0.0000    |
| 8783.5236               | 7360.9680   | 327.6675   | -1422.5556  | 7432.6149 |
| 330.7853                | -47.9417    | -132.7547  | 664265.7895 | -3.3421   |
| -3.3354                 |             |            |             |           |
| [52366]ENERGY: 13040000 | 3642.3285   | 5768.6869  | 5851.5578   |           |
| 343.2742                | -15438.1741 | -1809.2563 | 0.0000      | 0.0000    |
| 9002.1190               | 7360.5360   | 335.8221   | -1641.5831  | 7431.5105 |
| 330.7498                | 11.2133     | 16.6843    | 664265.7895 | -5.3888   |
| -5.3866                 |             |            |             |           |
| [52416]ENERGY: 13050000 | 3649.6667   | 5844.6832  | 5892.6753   |           |
| 335.1129                | -15385.7890 | -1809.3018 | 0.0000      | 0.0000    |
| 8834.4755               | 7361.5228   | 329.5682   | -1472.9527  | 7432.6904 |
| 331.0186                | 155.0131    | 40.6197    | 664265.7895 | -2.7136   |
| -2.7398                 |             |            |             |           |
| [52452]ENERGY: 13060000 | 3717.8095   | 5842.3862  | 5905.6094   |           |
| 348.0279                | -15496.9946 | -1785.0112 | 0.0000      | 0.0000    |
| 8828.3420               | 7360.1692   | 329.3394   | -1468.1728  | 7434.2178 |
| 330.8184                | 99.4945     | 54.2811    | 664265.7895 | -4.9133   |
| -4.8833                 |             |            |             |           |
| [52502]ENERGY: 13070000 | 3673.2794   | 5897.8015  | 5956.2482   |           |
| 359.2467                | -15443.2947 | -1920.7199 | 0.0000      | 0.0000    |
| 8841.4928               | 7364.0539   | 329.8300   | -1477.4389  | 7436.4369 |
| 331.0436                | -63.6527    | -94.4725   | 664265.7895 | -2.7652   |
| -2.7725                 |             |            |             |           |
| [52538]ENERGY: 13080000 | 3613.5311   | 5861.5401  | 5912.8477   |           |
| 362.8605                | -15404.6264 | -1892.8716 | 0.0000      | 0.0000    |
| 8908.4726               | 7361.7540   | 332.3286   | -1546.7186  | 7436.2229 |
| 330.9157                | 111.4093    | 20.7964    | 664265.7895 | -5.7522   |
| -5.7546                 |             |            |             |           |
| [52588]ENERGY: 13090000 | 3566.7373   | 5788.0582  | 5893.7917   |           |
| 363.8817                | -15394.6067 | -1840.8730 | 0.0000      | 0.0000    |
| 8987.6212               | 7364.6105   | 335.2813   | -1623.0107  | 7436.0933 |
| 331.0126                | 44.7538     | -39.7838   | 664265.7895 | -8.2791   |
| -8.2808                 |             |            |             |           |
| [52627]ENERGY: 13100000 | 3624.1711   | 5944.0551  | 5941.2905   |           |
| 363.8082                | -15426.6778 | -1867.8246 | 0.0000      | 0.0000    |
| 8786.4024               | 7365.2249   | 327.7748   | -1421.1775  | 7435.3383 |
| 331.0370                | -58.0953    | -4.4381    | 664265.7895 | -7.4981   |
| -7.4985                 |             |            |             |           |
| [52677]ENERGY: 13110000 | 3693.2447   | 5777.5785  | 5919.5198   |           |
| 381.6368                | -15417.3263 | -1870.5385 | 0.0000      | 0.0000    |
| 8881.4110               | 7365.5261   | 331.3191   | -1515.8850  | 7435.7331 |
| 331.1790                | -114.6381   | -122.1185  | 664265.7895 | -10.7674  |
| -10.7695                |             |            |             |           |
| [52713]ENERGY: 13120000 | 3643.0218   | 5889.4578  | 5865.2292   |           |
| 353.3660                | -15403.8515 | -1881.2383 | 0.0000      | 0.0000    |
| 8896.5695               | 7362.5545   | 331.8846   | -1534.0150  | 7435.9022 |
| 331.2161                | 69.3751     | -4.0121    | 664265.7895 | -3.5364   |
| -3.5195                 |             |            |             |           |
| [52763]ENERGY: 13130000 | 3649.4883   | 5908.8469  | 5867.1289   |           |
| 371.9391                | -15348.0913 | -1887.7242 | 0.0000      | 0.0000    |

## Supplementary Text 6

|                         |             |            |             |           |
|-------------------------|-------------|------------|-------------|-----------|
| 8808.1686               | 7369.7564   | 328.5868   | -1438.4122  | 7436.0029 |
| 331.2160                | -101.1326   | -163.2321  | 664265.7895 | -9.4174   |
| -9.4242                 |             |            |             |           |
| [52799]ENERGY: 13140000 | 3625.2816   | 5888.3589  | 5968.1423   |           |
| 386.0619                | -15385.3739 | -1891.6757 | 0.0000      | 0.0000    |
| 8778.3652               | 7369.1602   | 327.4750   | -1409.2049  | 7438.2517 |
| 331.2748                | 107.7235    | 89.0692    | 664265.7895 | -1.7853   |
| -1.7805                 |             |            |             |           |
| [52849]ENERGY: 13150000 | 3639.9102   | 5839.7319  | 5961.0953   |           |
| 363.8247                | -15424.3028 | -1889.3488 | 0.0000      | 0.0000    |
| 8872.6310               | 7363.5416   | 330.9916   | -1509.0894  | 7437.8003 |
| 331.1605                | -15.2472    | -36.8404   | 664265.7895 | -2.2854   |
| -2.2960                 |             |            |             |           |
| [52885]ENERGY: 13160000 | 3581.7199   | 5890.6878  | 5917.0670   |           |
| 357.6475                | -15408.0625 | -1863.3590 | 0.0000      | 0.0000    |
| 8890.4095               | 7366.1101   | 331.6548   | -1524.2994  | 7438.0920 |
| 331.4720                | 95.4893     | 137.1541   | 664265.7895 | -7.1311   |
| -7.1313                 |             |            |             |           |
| [52935]ENERGY: 13170000 | 3701.7921   | 5817.7131  | 5951.3661   |           |
| 379.4414                | -15439.0073 | -1898.6856 | 0.0000      | 0.0000    |
| 8852.2052               | 7364.8250   | 330.2296   | -1487.3802  | 7436.4199 |
| 331.5606                | -19.2089    | -99.3648   | 664265.7895 | -5.7284   |
| -5.7519                 |             |            |             |           |
| [52971]ENERGY: 13180000 | 3596.1040   | 5872.4817  | 5931.6020   |           |
| 360.5630                | -15426.4802 | -1834.4347 | 0.0000      | 0.0000    |
| 8864.8873               | 7364.7231   | 330.7027   | -1500.1642  | 7437.7488 |
| 331.4793                | 148.1166    | 119.0316   | 664265.7895 | -7.8349   |
| -7.8232                 |             |            |             |           |
| [53021]ENERGY: 13190000 | 3535.7246   | 5942.5714  | 5868.5640   |           |
| 367.6318                | -15407.1494 | -1844.2953 | 0.0000      | 0.0000    |
| 8902.4851               | 7365.5322   | 332.1053   | -1536.9529  | 7438.2103 |
| 331.3837                | 85.1450     | 67.5331    | 664265.7895 | -8.5510   |
| -8.5462                 |             |            |             |           |
| [53060]ENERGY: 13200000 | 3645.7459   | 5856.0287  | 5927.3496   |           |
| 369.5900                | -15316.1601 | -1944.7391 | 0.0000      | 0.0000    |
| 8830.3793               | 7368.1943   | 329.4154   | -1462.1849  | 7438.8927 |
| 331.3957                | -99.8766    | -37.5264   | 664265.7895 | -10.6080  |
| -10.5932                |             |            |             |           |
| [53110]ENERGY: 13210000 | 3643.4235   | 5918.0888  | 5969.7292   |           |
| 357.8913                | -15415.8407 | -1891.0258 | 0.0000      | 0.0000    |
| 8784.8773               | 7367.1436   | 327.7180   | -1417.7337  | 7439.7327 |
| 331.1768                | -86.7908    | -105.2486  | 664265.7895 | -2.3250   |
| -2.3103                 |             |            |             |           |
| [53146]ENERGY: 13220000 | 3665.2432   | 5864.4529  | 5883.9157   |           |
| 371.1851                | -15417.8446 | -1875.6275 | 0.0000      | 0.0000    |
| 8877.8215               | 7369.1462   | 331.1852   | -1508.6753  | 7439.0649 |
| 331.2167                | -114.1828   | -105.9803  | 664265.7895 | -4.1497   |
| -4.1587                 |             |            |             |           |
| [53196]ENERGY: 13230000 | 3607.4209   | 5951.1575  | 5951.8889   |           |
| 362.0414                | -15417.1436 | -1915.1973 | 0.0000      | 0.0000    |
| 8830.4414               | 7370.6094   | 329.4177   | -1459.8321  | 7439.7649 |
| 331.3745                | 2.2878      | -79.9330   | 664265.7895 | -7.6743   |
| -7.6992                 |             |            |             |           |
| [53232]ENERGY: 13240000 | 3552.3222   | 5802.4319  | 5894.3550   |           |

## Supplementary Text 6

|                         |             |            |             |           |
|-------------------------|-------------|------------|-------------|-----------|
| 372.8873                | -15343.4370 | -1820.0922 | 0.0000      | 0.0000    |
| 8908.7854               | 7367.2526   | 332.3403   | -1541.5328  | 7439.1268 |
| 331.3344                | 203.7696    | 25.2240    | 664265.7895 | -4.1538   |
| -4.1529                 |             |            |             |           |
| [53282]ENERGY: 13250000 | 3635.2115   | 5838.7375  | 5912.8731   |           |
| 350.9558                | -15439.7403 | -1827.3962 | 0.0000      | 0.0000    |
| 8900.8378               | 7371.4792   | 332.0438   | -1529.3586  | 7438.9862 |
| 331.0423                | -6.9650     | -48.6683   | 664265.7895 | -9.1880   |
| -9.1819                 |             |            |             |           |
| [53318]ENERGY: 13260000 | 3658.7440   | 5914.0434  | 5947.3563   |           |
| 381.8192                | -15476.3117 | -1823.1027 | 0.0000      | 0.0000    |
| 8769.7751               | 7372.3236   | 327.1546   | -1397.4515  | 7439.8241 |
| 331.0489                | -53.9883    | -122.5877  | 664265.7895 | -6.3890   |
| -6.3801                 |             |            |             |           |
| [53368]ENERGY: 13270000 | 3621.0950   | 5832.1392  | 5909.6337   |           |
| 374.4756                | -15398.9754 | -1856.8139 | 0.0000      | 0.0000    |
| 8889.3819               | 7370.9360   | 331.6165   | -1518.4458  | 7438.7637 |
| 331.2947                | 104.6807    | 61.2746    | 664265.7895 | -4.2576   |
| -4.2750                 |             |            |             |           |
| [53404]ENERGY: 13280000 | 3588.7326   | 5875.0678  | 5949.4315   |           |
| 371.9523                | -15479.6129 | -1857.7424 | 0.0000      | 0.0000    |
| 8922.5112               | 7370.3401   | 332.8524   | -1552.1711  | 7441.3264 |
| 331.2100                | 75.3835     | -34.4999   | 664265.7895 | -9.5667   |
| -9.5507                 |             |            |             |           |
| [53454]ENERGY: 13290000 | 3671.0397   | 5878.0468  | 5948.8426   |           |
| 344.6567                | -15513.2704 | -1821.3925 | 0.0000      | 0.0000    |
| 8860.3607               | 7368.2835   | 330.5338   | -1492.0771  | 7439.5754 |
| 331.2538                | -12.9763    | -25.0280   | 664265.7895 | -6.4535   |
| -6.4674                 |             |            |             |           |
| [53493]ENERGY: 13300000 | 3567.0191   | 5892.8412  | 5920.3419   |           |
| 370.7178                | -15476.7230 | -1851.0615 | 0.0000      | 0.0000    |
| 8940.7763               | 7363.9118   | 333.5337   | -1576.8645  | 7440.6030 |
| 331.2917                | -8.4162     | 16.3081    | 664265.7895 | -4.1179   |
| -4.0972                 |             |            |             |           |
| [53543]ENERGY: 13310000 | 3630.9518   | 5900.3656  | 5890.8143   |           |
| 360.5550                | -15416.3256 | -1852.2408 | 0.0000      | 0.0000    |
| 8856.1462               | 7370.2666   | 330.3766   | -1485.8796  | 7441.7116 |
| 331.3959                | 51.9100     | 1.8542     | 664265.7895 | -3.2989   |
| -3.3000                 |             |            |             |           |
| [53579]ENERGY: 13320000 | 3583.6063   | 5880.3075  | 5906.1665   |           |
| 357.9080                | -15439.1360 | -1819.9900 | 0.0000      | 0.0000    |
| 8899.5963               | 7368.4586   | 331.9975   | -1531.1377  | 7440.5437 |
| 331.1954                | 123.6535    | 64.8057    | 664265.7895 | -7.7427   |
| -7.7460                 |             |            |             |           |
| [53629]ENERGY: 13330000 | 3616.0495   | 5880.4562  | 5907.9816   |           |
| 378.1738                | -15407.2583 | -1816.4307 | 0.0000      | 0.0000    |
| 8811.5968               | 7370.5690   | 328.7147   | -1441.0279  | 7440.3743 |
| 331.2163                | 10.4443     | 68.5292    | 664265.7895 | -5.4758   |
| -5.4861                 |             |            |             |           |
| [53665]ENERGY: 13340000 | 3580.1135   | 5835.3255  | 5980.5437   |           |
| 375.1164                | -15427.9614 | -1929.1465 | 0.0000      | 0.0000    |
| 8954.3455               | 7368.3366   | 334.0399   | -1586.0088  | 7441.8853 |
| 330.9694                | -2.2858     | -67.3623   | 664265.7895 | -3.4992   |
| -3.5026                 |             |            |             |           |

## Supplementary Text 6

|                         |             |            |             |
|-------------------------|-------------|------------|-------------|
| [53715]ENERGY: 13350000 | 3671.4196   | 5937.2352  | 5921.0784   |
| 353.9248                | -15473.0799 | -1838.9676 | 0.0000      |
| 8798.9044               | 7370.5149   | 328.2412   | -1428.3895  |
| 331.2541                | -101.1083   | -77.8125   | 664265.7895 |
| -1.6409                 |             |            | -1.6481     |
| [53751]ENERGY: 13360000 | 3692.9585   | 5798.8062  | 5888.0195   |
| 358.0349                | -15485.9778 | -1854.4052 | 0.0000      |
| 8972.1082               | 7369.5442   | 334.7026   | -1602.5640  |
| 331.1544                | -39.3397    | -57.9138   | 664265.7895 |
| -5.8062                 |             |            | -5.8236     |
| [53801]ENERGY: 13370000 | 3668.1436   | 5812.0508  | 5916.8894   |
| 371.4837                | -15370.3899 | -1923.3540 | 0.0000      |
| 8899.9214               | 7374.7449   | 332.0096   | -1525.1764  |
| 331.4191                | -5.3975     | -45.1918   | 664265.7895 |
| -5.2633                 |             |            | -5.2495     |
| [53837]ENERGY: 13380000 | 3623.0063   | 5824.3103  | 5911.4372   |
| 367.4579                | -15270.7260 | -1934.5210 | 0.0000      |
| 8855.8159               | 7376.7807   | 330.3643   | -1479.0352  |
| 331.5809                | 47.8789     | 48.8411    | 664265.7895 |
| -2.7031                 |             |            | -2.7086     |
| [53887]ENERGY: 13390000 | 3619.9238   | 5938.7894  | 5906.0074   |
| 359.2615                | -15471.5284 | -1863.1792 | 0.0000      |
| 8880.8557               | 7370.1302   | 331.2984   | -1510.7255  |
| 331.5804                | 7.7179      | -30.4243   | 664265.7895 |
| -4.9085                 |             |            | -4.8967     |
| [53926]ENERGY: 13400000 | 3578.9006   | 5940.9254  | 5928.0481   |
| 389.0278                | -15471.6032 | -1795.9169 | 0.0000      |
| 8807.3489               | 7376.7307   | 328.5563   | -1430.6182  |
| 331.5357                | 144.1237    | 44.3494    | 664265.7895 |
| -6.7554                 |             |            | -6.7526     |
| [53976]ENERGY: 13410000 | 3614.3383   | 5873.9407  | 5896.7013   |
| 362.6032                | -15445.1629 | -1875.3105 | 0.0000      |
| 8947.3362               | 7374.4463   | 333.7784   | -1572.8899  |
| 331.6266                | 126.1121    | 43.9348    | 664265.7895 |
| -4.2476                 |             |            | -4.2403     |
| [54012]ENERGY: 13420000 | 3621.1602   | 5893.7460  | 5953.2057   |
| 358.2349                | -15404.5678 | -1871.3458 | 0.0000      |
| 8825.3677               | 7375.8009   | 329.2284   | -1449.5668  |
| 331.5090                | 173.4864    | 110.2858   | 664265.7895 |
| -7.9994                 |             |            | -7.9975     |
| [54062]ENERGY: 13430000 | 3609.4709   | 5903.6399  | 5918.8330   |
| 363.0333                | -15443.5904 | -1854.4175 | 0.0000      |
| 8880.2806               | 7377.2497   | 331.2770   | -1503.0309  |
| 331.5075                | -51.7973    | -5.5638    | 664265.7895 |
| -4.6708                 |             |            | -4.6778     |
| [54098]ENERGY: 13440000 | 3580.3945   | 5961.1297  | 5908.9319   |
| 356.7596                | -15417.8305 | -1888.1307 | 0.0000      |
| 8872.5616               | 7373.8161   | 330.9890   | -1498.7455  |
| 331.4679                | 43.7735     | 52.6521    | 664265.7895 |
| -1.6478                 |             |            | -1.6578     |
| [54148]ENERGY: 13450000 | 3652.6296   | 5803.1053  | 5851.2122   |
| 366.0202                | -15398.6954 | -1808.4328 | 0.0000      |
| 8909.6990               | 7375.5381   | 332.3744   | -1534.1609  |
| 331.6069                | 47.6897     | 85.2991    | 664265.7895 |
|                         |             |            | -3.9666     |

## Supplementary Text 6

-3.9768  
[54184]ENERGY: 13460000 3669.9561 5860.5225 5878.8988  
383.9409 -15430.3072 -1861.4636 0.0000 0.0000  
8872.3836 7373.9311 330.9824 -1498.4525 7447.3265  
331.4738 174.1085 50.6301 664265.7895 -1.8376  
-1.8288  
[54234]ENERGY: 13470000 3549.5673 5936.2377 5889.1557  
358.7998 -15484.3137 -1807.3891 0.0000 0.0000  
8933.1327 7375.1904 333.2486 -1557.9423 7447.2270  
331.5225 -45.3990 -33.1669 664265.7895 -5.9030  
-5.9109  
[54270]ENERGY: 13480000 3645.5879 5814.9179 5961.7729  
356.7485 -15479.0123 -1820.6227 0.0000 0.0000  
8897.6876 7377.0797 331.9263 -1520.6079 7449.2209  
331.6983 65.1526 89.3830 664265.7895 -1.2903  
-1.2893  
[54320]ENERGY: 13490000 3656.7199 5790.3108 5925.8294  
369.7784 -15425.8687 -1853.3444 0.0000 0.0000  
8913.3731 7376.7985 332.5115 -1536.5746 7448.1534  
331.6560 75.5227 58.5344 664265.7895 -6.3451  
-6.3247  
[54359]ENERGY: 13500000 3683.2010 5918.6090 5949.1347  
365.7858 -15494.5790 -1799.7719 0.0000 0.0000  
8764.1100 7386.4895 326.9432 -1377.6204 7450.0872  
331.6000 44.3212 65.7922 664265.7895 -5.1311  
-5.1488  
[54409]ENERGY: 13510000 3699.8061 5900.6128 5904.5732  
356.8167 -15478.2223 -1854.4985 0.0000 0.0000  
8847.1254 7376.2134 330.0401 -1470.9121 7450.3927  
331.6423 -15.3081 9.4209 664265.7895 -5.5867  
-5.5714  
[54445]ENERGY: 13520000 3650.8970 5888.7375 5943.9013  
358.6922 -15403.1315 -1908.4076 0.0000 0.0000  
8849.8632 7380.5522 330.1422 -1469.3110 7450.1825  
331.5649 -149.3722 -100.9899 664265.7895 -4.5338  
-4.5363  
[54495]ENERGY: 13530000 3627.3673 5923.8861 5949.4532  
364.3568 -15507.0797 -1799.9492 0.0000 0.0000  
8817.2711 7375.3055 328.9264 -1441.9656 7448.8608  
331.3697 0.7720 97.8126 664265.7895 -5.8345  
-5.8359  
[54531]ENERGY: 13540000 3727.7046 5853.2664 5908.3774  
353.2732 -15521.4113 -1865.3833 0.0000 0.0000  
8920.7566 7376.5838 332.7869 -1544.1729 7449.3640  
331.5791 11.8076 -92.5963 664265.7895 -6.9993  
-7.0065  
[54581]ENERGY: 13550000 3629.1961 5886.4570 5909.6620  
402.4778 -15446.2272 -1795.5635 0.0000 0.0000  
8792.3465 7378.3486 327.9966 -1413.9979 7450.0132  
331.5027 254.1786 167.1628 664265.7895 -7.8609  
-7.8611  
[54617]ENERGY: 13560000 3602.4060 5848.1683 5912.3438  
371.8097 -15350.2293 -1825.0877 0.0000 0.0000  
8820.4429 7379.8537 329.0447 -1440.5891 7449.1832

## Supplementary Text 6

|                         |             |            |             |           |
|-------------------------|-------------|------------|-------------|-----------|
| 331.4487                | -88.0259    | -57.2557   | 664265.7895 | -6.6004   |
| -6.6094                 |             |            |             |           |
| [54667]ENERGY: 13570000 | 3620.3847   | 5854.3181  | 5966.4505   |           |
| 372.1576                | -15466.5932 | -1874.6701 | 0.0000      | 0.0000    |
| 8904.2981               | 7376.3457   | 332.1729   | -1527.9524  | 7451.2672 |
| 331.3780                | 8.8552      | -20.0887   | 664265.7895 | -8.7700   |
| -8.7640                 |             |            |             |           |
| [54703]ENERGY: 13580000 | 3647.9842   | 5792.4565  | 5927.0761   |           |
| 365.4329                | -15362.2849 | -1922.9673 | 0.0000      | 0.0000    |
| 8935.7708               | 7383.4683   | 333.3470   | -1552.3025  | 7452.8425 |
| 331.5972                | 22.7596     | -56.4606   | 664265.7895 | -1.9163   |
| -1.9020                 |             |            |             |           |
| [54753]ENERGY: 13590000 | 3689.2285   | 5953.8977  | 5914.8749   |           |
| 365.5598                | -15430.7761 | -1918.5182 | 0.0000      | 0.0000    |
| 8807.0905               | 7381.3570   | 328.5466   | -1425.7335  | 7452.4949 |
| 331.3607                | -183.1992   | -157.5000  | 664265.7895 | 1.7253    |
| 1.7252                  |             |            |             |           |
| [54792]ENERGY: 13600000 | 3652.1279   | 5899.1093  | 5906.9883   |           |
| 369.1696                | -15467.2394 | -1898.5400 | 0.0000      | 0.0000    |
| 8920.6179               | 7382.2336   | 332.7817   | -1538.3843  | 7453.8552 |
| 331.3485                | 63.1363     | -13.8786   | 664265.7895 | -2.9955   |
| -3.0281                 |             |            |             |           |
| [54842]ENERGY: 13610000 | 3577.6174   | 5872.8546  | 5928.3540   |           |
| 350.1261                | -15421.2053 | -1813.6316 | 0.0000      | 0.0000    |
| 8888.7182               | 7382.8334   | 331.5917   | -1505.8848  | 7452.6494 |
| 331.3693                | 34.8767     | -22.3689   | 664265.7895 | 0.9919    |
| 0.9988                  |             |            |             |           |
| [54878]ENERGY: 13620000 | 3668.6406   | 5892.3948  | 5903.4480   |           |
| 364.7983                | -15393.8735 | -1834.8044 | 0.0000      | 0.0000    |
| 8783.8488               | 7384.4526   | 327.6796   | -1399.3962  | 7452.2806 |
| 331.1100                | 48.9076     | 55.5161    | 664265.7895 | -4.8774   |
| -4.8563                 |             |            |             |           |
| [54928]ENERGY: 13630000 | 3695.4570   | 5962.6067  | 5908.9630   |           |
| 359.6478                | -15473.8722 | -1895.5902 | 0.0000      | 0.0000    |
| 8828.7224               | 7385.9345   | 329.3536   | -1442.7879  | 7455.0204 |
| 331.2385                | 72.7646     | 114.2403   | 664265.7895 | -1.6691   |
| -1.6772                 |             |            |             |           |
| [54964]ENERGY: 13640000 | 3677.8922   | 5882.3643  | 5872.0978   |           |
| 360.0646                | -15401.6394 | -1817.8344 | 0.0000      | 0.0000    |
| 8811.8087               | 7384.7537   | 328.7226   | -1427.0550  | 7454.7818 |
| 331.0947                | -1.4267     | -21.2451   | 664265.7895 | -2.8206   |
| -2.8213                 |             |            |             |           |
| [55014]ENERGY: 13650000 | 3647.5852   | 5886.9770  | 5963.1890   |           |
| 358.2380                | -15463.7026 | -1883.6182 | 0.0000      | 0.0000    |
| 8875.9389               | 7384.6073   | 331.1150   | -1491.3316  | 7455.4273 |
| 331.3694                | -162.9324   | -115.6144  | 664265.7895 | -2.3673   |
| -2.3540                 |             |            |             |           |
| [55050]ENERGY: 13660000 | 3674.6224   | 5914.4793  | 5940.9298   |           |
| 351.3621                | -15408.1623 | -1872.7322 | 0.0000      | 0.0000    |
| 8787.0762               | 7387.5753   | 327.8000   | -1399.5010  | 7455.8196 |
| 331.1880                | 0.4942      | -58.9957   | 664265.7895 | -2.5854   |
| -2.5945                 |             |            |             |           |
| [55100]ENERGY: 13670000 | 3592.9958   | 5888.1716  | 6015.9677   |           |
| 364.1624                | -15497.6689 | -1814.8726 | 0.0000      | 0.0000    |



## Supplementary Text 6

|                         |             |            |             |           |
|-------------------------|-------------|------------|-------------|-----------|
| 8835.7736               | 7384.5297   | 329.6166   | -1451.2440  | 7455.6886 |
| 330.9506                | 89.1744     | -27.3894   | 664265.7895 | -2.0023   |
| -2.0200                 |             |            |             |           |
| [55136]ENERGY: 13680000 | 3659.7743   | 5931.9555  | 5909.3998   |           |
| 342.8608                | -15549.4147 | -1770.3603 | 0.0000      | 0.0000    |
| 8860.6978               | 7384.9132   | 330.5464   | -1475.7846  | 7455.7507 |
| 331.0742                | 148.1315    | 147.7026   | 664265.7895 | 0.6815    |
| 0.7027                  |             |            |             |           |
| [55186]ENERGY: 13690000 | 3634.4173   | 5859.6888  | 5902.8562   |           |
| 348.9983                | -15498.2921 | -1808.0388 | 0.0000      | 0.0000    |
| 8945.1598               | 7384.7894   | 333.6973   | -1560.3704  | 7455.7291 |
| 331.1368                | -47.4380    | -24.8688   | 664265.7895 | -3.6020   |
| -3.6154                 |             |            |             |           |
| [55225]ENERGY: 13700000 | 3591.8441   | 5876.7951  | 5927.6678   |           |
| 360.9759                | -15412.3138 | -1771.0304 | 0.0000      | 0.0000    |
| 8811.0858               | 7385.0247   | 328.6957   | -1426.0611  | 7455.7130 |
| 331.3191                | 293.9740    | 265.5066   | 664265.7895 | -2.2940   |
| -2.2950                 |             |            |             |           |
| [55275]ENERGY: 13710000 | 3687.1023   | 5957.5417  | 5929.4078   |           |
| 371.0764                | -15459.0109 | -1850.7457 | 0.0000      | 0.0000    |
| 8749.4275               | 7384.7993   | 326.3955   | -1364.6283  | 7454.8452 |
| 331.0402                | -146.1525   | -91.6511   | 664265.7895 | -3.4501   |
| -3.4226                 |             |            |             |           |
| [55311]ENERGY: 13720000 | 3704.2235   | 5879.7980  | 5933.2108   |           |
| 370.4479                | -15460.8900 | -1856.4548 | 0.0000      | 0.0000    |
| 8813.8008               | 7384.1363   | 328.7969   | -1429.6645  | 7455.4206 |
| 331.0758                | 46.8200     | 60.9648    | 664265.7895 | -3.1933   |
| -3.2004                 |             |            |             |           |
| [55361]ENERGY: 13730000 | 3551.5846   | 5890.3658  | 5917.3357   |           |
| 366.6017                | -15489.5850 | -1763.8204 | 0.0000      | 0.0000    |
| 8909.2997               | 7381.7821   | 332.3595   | -1527.5176  | 7454.8442 |
| 331.4171                | 80.3178     | 92.9980    | 664265.7895 | -2.9033   |
| -2.9032                 |             |            |             |           |
| [55397]ENERGY: 13740000 | 3749.1100   | 5851.7974  | 5905.8123   |           |
| 352.7003                | -15442.3027 | -1837.8400 | 0.0000      | 0.0000    |
| 8805.7706               | 7385.0479   | 328.4974   | -1420.7228  | 7455.2196 |
| 331.5108                | -111.8089   | -104.5844  | 664265.7895 | -5.2010   |
| -5.2158                 |             |            |             |           |
| [55447]ENERGY: 13750000 | 3563.2687   | 5927.8938  | 5967.9937   |           |
| 352.3857                | -15430.6444 | -1854.6417 | 0.0000      | 0.0000    |
| 8862.5698               | 7388.8256   | 330.6163   | -1473.7441  | 7458.6176 |
| 331.2518                | 38.0897     | -5.1219    | 664265.7895 | -0.8974   |
| -0.8969                 |             |            |             |           |
| [55483]ENERGY: 13760000 | 3599.5626   | 5858.5007  | 5871.7832   |           |
| 375.1154                | -15462.3446 | -1723.2781 | 0.0000      | 0.0000    |
| 8864.3632               | 7383.7023   | 330.6832   | -1480.6609  | 7456.9620 |
| 331.4504                | 62.8152     | 22.9571    | 664265.7895 | -2.5252   |
| -2.5227                 |             |            |             |           |
| [55533]ENERGY: 13770000 | 3653.9189   | 5961.0400  | 5906.4730   |           |
| 344.4111                | -15507.8223 | -1884.0316 | 0.0000      | 0.0000    |
| 8911.7539               | 7385.7431   | 332.4511   | -1526.0108  | 7457.0061 |
| 331.6539                | -6.9286     | 11.7890    | 664265.7895 | -5.9326   |
| -5.9322                 |             |            |             |           |
| [55569]ENERGY: 13780000 | 3723.3483   | 5980.4765  | 5937.8137   |           |

## Supplementary Text 6

|                         |             |            |             |           |
|-------------------------|-------------|------------|-------------|-----------|
| 386.7978                | -15551.9801 | -1843.9674 | 0.0000      | 0.0000    |
| 8755.2004               | 7387.6892   | 326.6109   | -1367.5112  | 7457.7850 |
| 331.6270                | 32.6727     | -24.6388   | 664265.7895 | -9.5106   |
| -9.5219                 |             |            |             |           |
| [55619]ENERGY: 13790000 | 3616.0449   | 5941.9682  | 5897.2851   |           |
| 318.7233                | -15400.2447 | -1860.9349 | 0.0000      | 0.0000    |
| 8875.4909               | 7388.3329   | 331.0983   | -1487.1581  | 7457.0765 |
| 331.5307                | -146.1280   | -46.2892   | 664265.7895 | -9.1990   |
| -9.1751                 |             |            |             |           |
| [55658]ENERGY: 13800000 | 3618.3845   | 5861.7557  | 5952.1634   |           |
| 394.4172                | -15403.2057 | -1813.0709 | 0.0000      | 0.0000    |
| 8782.6200               | 7393.0642   | 327.6337   | -1389.5558  | 7458.4889 |
| 331.6605                | -54.0810    | -58.6133   | 664265.7895 | -4.8618   |
| -4.8737                 |             |            |             |           |
| [55708]ENERGY: 13810000 | 3675.3759   | 5869.3277  | 5915.8266   |           |
| 358.4047                | -15340.2289 | -1965.6210 | 0.0000      | 0.0000    |
| 8874.3778               | 7387.4628   | 331.0568   | -1486.9150  | 7460.1162 |
| 331.7026                | -239.5555   | -251.8632  | 664265.7895 | -8.5772   |
| -8.5837                 |             |            |             |           |
| [55744]ENERGY: 13820000 | 3697.4445   | 5916.0029  | 5919.2129   |           |
| 395.8349                | -15463.5207 | -1908.5822 | 0.0000      | 0.0000    |
| 8834.8137               | 7391.2060   | 329.5808   | -1443.6078  | 7461.0607 |
| 331.2923                | 13.6677     | 12.1857    | 664265.7895 | -5.7396   |
| -5.7287                 |             |            |             |           |
| [55794]ENERGY: 13830000 | 3708.2966   | 5790.8960  | 5915.2627   |           |
| 367.3561                | -15476.1067 | -1855.5832 | 0.0000      | 0.0000    |
| 8937.9875               | 7388.1089   | 333.4297   | -1549.8785  | 7459.4838 |
| 331.5973                | -65.1035    | -24.4510   | 664265.7895 | -9.7466   |
| -9.7564                 |             |            |             |           |
| [55830]ENERGY: 13840000 | 3682.4496   | 5812.1138  | 5983.4242   |           |
| 354.3983                | -15503.6876 | -1796.0123 | 0.0000      | 0.0000    |
| 8855.7872               | 7388.4732   | 330.3632   | -1467.3140  | 7460.7509 |
| 331.6241                | 82.7955     | 74.8596    | 664265.7895 | -5.3934   |
| -5.3831                 |             |            |             |           |
| [55880]ENERGY: 13850000 | 3626.5222   | 5834.3803  | 5937.5695   |           |
| 356.5289                | -15462.8930 | -1825.6316 | 0.0000      | 0.0000    |
| 8924.0009               | 7390.4771   | 332.9079   | -1533.5238  | 7462.4979 |
| 331.5981                | -149.1441   | -180.9712  | 664265.7895 | -4.9703   |
| -4.9920                 |             |            |             |           |
| [55916]ENERGY: 13860000 | 3764.6341   | 5824.5331  | 5905.4110   |           |
| 356.2723                | -15392.3001 | -1895.0422 | 0.0000      | 0.0000    |
| 8825.5857               | 7389.0938   | 329.2366   | -1436.4918  | 7460.6167 |
| 331.4918                | -121.6304   | -122.4107  | 664265.7895 | -5.2349   |
| -5.2035                 |             |            |             |           |
| [55966]ENERGY: 13870000 | 3604.8133   | 5874.1008  | 5914.3700   |           |
| 370.3691                | -15489.2217 | -1836.2233 | 0.0000      | 0.0000    |
| 8951.1702               | 7389.3783   | 333.9215   | -1561.7919  | 7461.5993 |
| 331.5693                | 164.7165    | 63.3532    | 664265.7895 | -2.8049   |
| -2.8186                 |             |            |             |           |
| [56002]ENERGY: 13880000 | 3699.6006   | 5840.5458  | 5890.2744   |           |
| 361.2571                | -15504.8900 | -1848.9356 | 0.0000      | 0.0000    |
| 8951.4561               | 7389.3085   | 333.9321   | -1562.1476  | 7462.1569 |
| 331.8286                | -92.3207    | -63.0958   | 664265.7895 | -4.8231   |
| -4.8417                 |             |            |             |           |

## Supplementary Text 6

|                         |             |            |             |
|-------------------------|-------------|------------|-------------|
| [56052]ENERGY: 13890000 | 3628.1295   | 5837.8869  | 5895.3510   |
| 352.1924                | -15447.3009 | -1764.5365 | 0.0000      |
| 8888.6922               | 7390.4146   | 331.5907   | -1498.2775  |
| 331.6756                | 7.0468      | 81.4687    | 664265.7895 |
| -1.1592                 |             |            | -1.1787     |
| [56091]ENERGY: 13900000 | 3575.1482   | 5867.1248  | 5905.5210   |
| 368.4160                | -15431.1493 | -1873.5857 | 0.0000      |
| 8981.5049               | 7392.9799   | 335.0531   | -1588.5250  |
| 331.5235                | -61.8770    | -145.9253  | 664265.7895 |
| -5.9271                 |             |            | -5.9181     |
| [56141]ENERGY: 13910000 | 3666.8279   | 5888.1995  | 5908.7364   |
| 363.3815                | -15435.1161 | -1862.6367 | 0.0000      |
| 8864.3118               | 7393.7043   | 330.6812   | -1470.6075  |
| 331.8253                | -37.4051    | -53.9593   | 664265.7895 |
| -4.5799                 |             |            | -4.5912     |
| [56177]ENERGY: 13920000 | 3634.4637   | 5953.4782  | 5844.5931   |
| 372.6662                | -15436.8819 | -1914.6182 | 0.0000      |
| 8941.2353               | 7394.9365   | 333.5509   | -1546.2988  |
| 331.7958                | 41.9587     | -94.8538   | 664265.7895 |
| -8.9005                 |             |            | -8.8838     |
| [56227]ENERGY: 13930000 | 3664.9039   | 5833.6943  | 5935.1588   |
| 386.9402                | -15491.4816 | -1835.0526 | 0.0000      |
| 8901.6970               | 7395.8600   | 332.0759   | -1505.8370  |
| 331.9985                | 40.7967     | -6.4492    | 664265.7895 |
| -0.5600                 |             |            | -0.5831     |
| [56263]ENERGY: 13940000 | 3653.8785   | 5797.8799  | 5953.6763   |
| 370.6286                | -15360.2336 | -1902.0847 | 0.0000      |
| 8887.2584               | 7401.0034   | 331.5373   | -1486.2550  |
| 331.9872                | -84.3804    | -62.5728   | 664265.7895 |
| -1.2367                 |             |            | -1.2393     |
| [56313]ENERGY: 13950000 | 3599.2610   | 5935.8867  | 5924.2452   |
| 367.9563                | -15449.6715 | -1833.4016 | 0.0000      |
| 8853.9237               | 7398.1999   | 330.2937   | -1455.7238  |
| 331.8259                | 185.1933    | 176.6059   | 664265.7895 |
| -1.5699                 |             |            | -1.5428     |
| [56349]ENERGY: 13960000 | 3572.1109   | 5796.2248  | 5993.2728   |
| 361.4702                | -15407.7322 | -1854.2863 | 0.0000      |
| 8936.6163               | 7397.6765   | 333.3785   | -1538.9398  |
| 331.7444                | 86.8982     | 3.6122     | 664265.7895 |
| -2.3205                 |             |            | -2.3267     |
| [56399]ENERGY: 13970000 | 3567.8585   | 5891.9246  | 5973.5521   |
| 354.4915                | -15531.1536 | -1785.3644 | 0.0000      |
| 8922.4993               | 7393.8081   | 332.8519   | -1528.6913  |
| 331.7847                | 70.0220     | 24.4312    | 664265.7895 |
| -2.9400                 |             |            | -2.9539     |
| [56435]ENERGY: 13980000 | 3572.2058   | 6003.8457  | 5943.6914   |
| 360.6688                | -15413.2155 | -1855.7061 | 0.0000      |
| 8788.4727               | 7399.9628   | 327.8521   | -1388.5100  |
| 331.8729                | -45.9674    | -74.7075   | 664265.7895 |
| -2.8635                 |             |            | -2.8640     |
| [56485]ENERGY: 13990000 | 3635.6550   | 5892.9624  | 5888.6700   |
| 346.7461                | -15455.7546 | -1858.5674 | 0.0000      |
| 8948.2011               | 7397.9127   | 333.8107   | -1550.2884  |
| 331.8023                | 62.2493     | 81.4838    | 664265.7895 |
|                         |             |            | -2.0209     |

## Supplementary Text 6

-2.0283

|                         |             |            |             |
|-------------------------|-------------|------------|-------------|
| [56524]ENERGY: 14000000 | 3689.3364   | 5919.1814  | 5899.7786   |
| 341.6367                | -15423.8189 | -1858.4800 | 0.0000      |
| 8834.9036               | 7402.5378   | 329.5842   | -1432.3658  |
| 331.8619                | 30.3538     | 67.4973    | 664265.7895 |

-7.5006

|                         |             |            |             |
|-------------------------|-------------|------------|-------------|
| [56574]ENERGY: 14010000 | 3584.4712   | 5950.5960  | 5913.9632   |
| 394.6366                | -15452.3669 | -1889.7976 | 0.0000      |
| 8894.0193               | 7395.5217   | 331.7895   | -1498.4976  |
| 331.8299                | 70.2794     | 18.4152    | 664265.7895 |

-2.9908

|                         |             |            |             |
|-------------------------|-------------|------------|-------------|
| [56610]ENERGY: 14020000 | 3709.9385   | 5893.2846  | 5924.9807   |
| 348.0096                | -15469.8087 | -1899.1470 | 0.0000      |
| 8889.4454               | 7396.7031   | 331.6188   | -1492.7423  |
| 331.8375                | -57.7782    | -96.0900   | 664265.7895 |

-5.9221

|                         |             |            |             |
|-------------------------|-------------|------------|-------------|
| [56660]ENERGY: 14030000 | 3610.1002   | 5924.4981  | 5893.0676   |
| 346.9315                | -15405.6182 | -1835.4242 | 0.0000      |
| 8868.3714               | 7401.9263   | 330.8327   | -1466.4451  |
| 331.8077                | -7.0722     | -102.1278  | 664265.7895 |

-5.9188

|                         |             |            |             |
|-------------------------|-------------|------------|-------------|
| [56696]ENERGY: 14040000 | 3602.1445   | 5831.5839  | 5892.8899   |
| 357.5404                | -15457.6766 | -1826.9054 | 0.0000      |
| 8996.8571               | 7396.4336   | 335.6258   | -1600.4234  |
| 331.7974                | 146.4401    | 112.1908   | 664265.7895 |

-5.4452

|                         |             |            |             |
|-------------------------|-------------|------------|-------------|
| [56746]ENERGY: 14050000 | 3679.4415   | 5950.5346  | 5854.0652   |
| 368.8451                | -15437.1679 | -1873.6405 | 0.0000      |
| 8856.8469               | 7398.9248   | 330.4028   | -1457.9220  |
| 332.2054                | -71.1236    | -58.8376   | 664265.7895 |

-4.9802

|                         |             |            |             |
|-------------------------|-------------|------------|-------------|
| [56782]ENERGY: 14060000 | 3606.7357   | 5868.9396  | 5794.7660   |
| 338.8229                | -15396.4589 | -1796.2219 | 0.0000      |
| 8982.0375               | 7398.6209   | 335.0730   | -1583.4166  |
| 332.0772                | 60.5232     | 10.5381    | 664265.7895 |

-3.7806

|                         |             |            |             |
|-------------------------|-------------|------------|-------------|
| [56832]ENERGY: 14070000 | 3584.5948   | 5822.1923  | 5887.8811   |
| 359.7721                | -15403.3292 | -1797.9518 | 0.0000      |
| 8947.3410               | 7400.5002   | 333.7786   | -1546.8407  |
| 332.0286                | -102.6656   | -116.6707  | 664265.7895 |

-4.4130

|                         |             |            |             |
|-------------------------|-------------|------------|-------------|
| [56868]ENERGY: 14080000 | 3576.7198   | 5858.2839  | 5964.9818   |
| 365.6938                | -15414.3444 | -1844.8573 | 0.0000      |
| 8893.0551               | 7399.5327   | 331.7535   | -1493.5224  |
| 332.2462                | -86.7081    | -41.9405   | 664265.7895 |

-5.5650

|                         |             |            |             |
|-------------------------|-------------|------------|-------------|
| [56918]ENERGY: 14090000 | 3623.4525   | 5897.9555  | 5878.1389   |
| 372.8336                | -15489.2219 | -1841.2601 | 0.0000      |
| 8957.9059               | 7399.8045   | 334.1727   | -1558.1014  |
| 332.0889                | -68.3632    | -86.8787   | 664265.7895 |

-5.2047

|                         |             |            |            |
|-------------------------|-------------|------------|------------|
| [56957]ENERGY: 14100000 | 3669.5510   | 5877.2812  | 5913.6092  |
| 335.2411                | -15440.1538 | -1843.6251 | 0.0000     |
| 8890.3483               | 7402.2518   | 331.6525   | -1488.0965 |
|                         |             |            | 7473.4637  |

## Supplementary Text 6

|                         |             |            |             |           |
|-------------------------|-------------|------------|-------------|-----------|
| 331.9578                | -14.8848    | 39.2149    | 664265.7895 | -6.1878   |
| -6.1779                 |             |            |             |           |
| [57007]ENERGY: 14110000 | 3589.6383   | 5879.9031  | 5931.2197   |           |
| 367.8449                | -15454.5454 | -1867.8027 | 0.0000      | 0.0000    |
| 8955.4037               | 7401.6615   | 334.0794   | -1553.7421  | 7474.2207 |
| 332.2042                | -136.6469   | -154.3175  | 664265.7895 | -4.9493   |
| -4.9455                 |             |            |             |           |
| [57043]ENERGY: 14120000 | 3693.3887   | 5893.2067  | 5923.7585   |           |
| 359.6303                | -15546.5500 | -1818.6129 | 0.0000      | 0.0000    |
| 8898.0395               | 7402.8608   | 331.9394   | -1495.1788  | 7473.2022 |
| 332.2060                | -67.4848    | -0.5772    | 664265.7895 | -9.4514   |
| -9.4719                 |             |            |             |           |
| [57093]ENERGY: 14130000 | 3609.9684   | 5866.8255  | 5931.8462   |           |
| 374.0738                | -15397.3941 | -1842.0287 | 0.0000      | 0.0000    |
| 8861.6182               | 7404.9092   | 330.5808   | -1456.7089  | 7474.9512 |
| 332.0150                | 49.0893     | 11.7457    | 664265.7895 | -2.6640   |
| -2.6537                 |             |            |             |           |
| [57129]ENERGY: 14140000 | 3647.2327   | 5847.2024  | 5902.6722   |           |
| 368.7783                | -15431.8600 | -1855.6542 | 0.0000      | 0.0000    |
| 8923.8733               | 7402.2447   | 332.9032   | -1521.6286  | 7474.2016 |
| 332.0237                | -114.8157   | -46.0218   | 664265.7895 | -7.6260   |
| -7.6270                 |             |            |             |           |
| [57179]ENERGY: 14150000 | 3564.8270   | 5815.0130  | 5900.4326   |           |
| 340.1562                | -15334.2719 | -1852.1380 | 0.0000      | 0.0000    |
| 8971.0409               | 7405.0598   | 334.6627   | -1565.9811  | 7475.4761 |
| 332.0709                | -30.7294    | -64.4073   | 664265.7895 | -1.1180   |
| -1.1055                 |             |            |             |           |
| [57215]ENERGY: 14160000 | 3668.2910   | 5877.2443  | 5880.4336   |           |
| 360.5826                | -15479.1479 | -1816.4179 | 0.0000      | 0.0000    |
| 8913.0285               | 7404.0143   | 332.4986   | -1509.0143  | 7474.3418 |
| 332.1112                | -59.6765    | -122.6102  | 664265.7895 | -2.2441   |
| -2.2686                 |             |            |             |           |
| [57265]ENERGY: 14170000 | 3556.2603   | 5937.9214  | 5969.8298   |           |
| 363.0564                | -15460.8224 | -1834.6290 | 0.0000      | 0.0000    |
| 8872.4222               | 7404.0386   | 330.9838   | -1468.3836  | 7475.7106 |
| 332.0388                | 225.8222    | 243.4134   | 664265.7895 | -3.8227   |
| -3.8139                 |             |            |             |           |
| [57301]ENERGY: 14180000 | 3593.9728   | 5861.5599  | 5885.3761   |           |
| 353.3179                | -15370.9947 | -1853.7109 | 0.0000      | 0.0000    |
| 8936.9369               | 7406.4579   | 333.3905   | -1530.4790  | 7476.7341 |
| 332.0425                | 149.0535    | 66.4702    | 664265.7895 | -2.4546   |
| -2.4518                 |             |            |             |           |
| [57351]ENERGY: 14190000 | 3619.9911   | 5813.1188  | 5900.9779   |           |
| 378.5113                | -15464.1046 | -1749.4406 | 0.0000      | 0.0000    |
| 8904.4375               | 7403.4913   | 332.1781   | -1500.9461  | 7478.1068 |
| 332.0332                | 32.0311     | -7.4674    | 664265.7895 | -3.0402   |
| -3.0401                 |             |            |             |           |
| [57390]ENERGY: 14200000 | 3651.3207   | 5944.1872  | 5880.6259   |           |
| 366.9418                | -15394.8816 | -1923.9367 | 0.0000      | 0.0000    |
| 8883.5487               | 7407.8061   | 331.3989   | -1475.7426  | 7480.4466 |
| 331.9678                | -146.4541   | -143.7793  | 664265.7895 | -4.6584   |
| -4.6511                 |             |            |             |           |
| [57440]ENERGY: 14210000 | 3612.2890   | 5945.1500  | 5883.6448   |           |
| 402.8512                | -15487.0377 | -1780.2065 | 0.0000      | 0.0000    |

## Supplementary Text 6

|                         |             |            |             |           |
|-------------------------|-------------|------------|-------------|-----------|
| 8827.2083               | 7403.8991   | 329.2971   | -1423.3091  | 7477.2621 |
| 332.1384                | -7.6313     | 27.8693    | 664265.7895 | -5.7841   |
| -5.8114                 |             |            |             |           |
| [57476]ENERGY: 14220000 | 3604.8403   | 5948.8330  | 5902.0729   |           |
| 355.5503                | -15441.4175 | -1868.2679 | 0.0000      | 0.0000    |
| 8906.2823               | 7407.8934   | 332.2469   | -1498.3889  | 7478.6655 |
| 332.1639                | -56.6230    | -57.8906   | 664265.7895 | -5.0956   |
| -5.0790                 |             |            |             |           |
| [57526]ENERGY: 14230000 | 3594.8306   | 5882.4403  | 5925.5463   |           |
| 378.0153                | -15425.9290 | -1865.8021 | 0.0000      | 0.0000    |
| 8916.1423               | 7405.2436   | 332.6148   | -1510.8987  | 7480.7148 |
| 332.1761                | 151.8772    | 91.8567    | 664265.7895 | -4.1209   |
| -4.1223                 |             |            |             |           |
| [57562]ENERGY: 14240000 | 3695.7386   | 5835.7904  | 5974.3160   |           |
| 340.3314                | -15518.6259 | -1785.7239 | 0.0000      | 0.0000    |
| 8867.3240               | 7409.1508   | 330.7936   | -1458.1732  | 7479.9073 |
| 331.9884                | 5.3928      | 59.7325    | 664265.7895 | -3.5252   |
| -3.5029                 |             |            |             |           |
| [57612]ENERGY: 14250000 | 3616.2046   | 5965.4179  | 5937.7368   |           |
| 382.0158                | -15486.9418 | -1864.0759 | 0.0000      | 0.0000    |
| 8856.7200               | 7407.0775   | 330.3980   | -1449.6425  | 7481.6740 |
| 331.9350                | 43.1934     | 50.7603    | 664265.7895 | -3.4294   |
| -3.4569                 |             |            |             |           |
| [57648]ENERGY: 14260000 | 3642.7765   | 5871.8785  | 5896.8891   |           |
| 356.9062                | -15370.4134 | -1894.2997 | 0.0000      | 0.0000    |
| 8907.1384               | 7410.8756   | 332.2789   | -1496.2629  | 7482.9277 |
| 331.9917                | -45.9341    | -76.0318   | 664265.7895 | -4.8496   |
| -4.8334                 |             |            |             |           |
| [57698]ENERGY: 14270000 | 3639.3477   | 5868.5405  | 5876.5670   |           |
| 377.0273                | -15477.2408 | -1862.1615 | 0.0000      | 0.0000    |
| 8989.4447               | 7411.5250   | 335.3493   | -1577.9197  | 7481.7321 |
| 332.0915                | -3.4593     | -68.5846   | 664265.7895 | -7.5475   |
| -7.5602                 |             |            |             |           |
| [57734]ENERGY: 14280000 | 3623.6832   | 5862.3415  | 5920.2644   |           |
| 348.2279                | -15396.3467 | -1826.7607 | 0.0000      | 0.0000    |
| 8876.1058               | 7407.5153   | 331.1212   | -1468.5904  | 7481.5237 |
| 332.0055                | 28.4103     | 9.3534     | 664265.7895 | -6.1787   |
| -6.1551                 |             |            |             |           |
| [57784]ENERGY: 14290000 | 3664.9620   | 5898.8691  | 5922.3875   |           |
| 365.2139                | -15416.9974 | -1936.5861 | 0.0000      | 0.0000    |
| 8912.2287               | 7410.0776   | 332.4688   | -1502.1510  | 7482.1656 |
| 332.0265                | -121.4535   | -147.7496  | 664265.7895 | -6.6707   |
| -6.6748                 |             |            |             |           |
| [57823]ENERGY: 14300000 | 3691.2801   | 5885.3251  | 5903.3794   |           |
| 380.6768                | -15395.6228 | -1839.0533 | 0.0000      | 0.0000    |
| 8786.3436               | 7412.3289   | 327.7727   | -1374.0146  | 7482.2394 |
| 332.0240                | -24.2124    | -104.0313  | 664265.7895 | -4.0125   |
| -4.0486                 |             |            |             |           |
| [57873]ENERGY: 14310000 | 3658.5867   | 5931.0464  | 5975.9320   |           |
| 371.9783                | -15513.7302 | -1830.2745 | 0.0000      | 0.0000    |
| 8817.7917               | 7411.3306   | 328.9458   | -1406.4611  | 7483.1017 |
| 332.3097                | -63.4783    | -29.6625   | 664265.7895 | -1.7601   |
| -1.7273                 |             |            |             |           |
| [57909]ENERGY: 14320000 | 3657.9201   | 5830.0867  | 5937.4941   |           |

## Supplementary Text 6

|                         |             |            |             |           |
|-------------------------|-------------|------------|-------------|-----------|
| 361.6681                | -15452.6635 | -1842.1112 | 0.0000      | 0.0000    |
| 8918.5542               | 7410.9486   | 332.7047   | -1507.6056  | 7483.8473 |
| 332.2524                | -5.9421     | -74.3525   | 664265.7895 | -0.2150   |
| -0.2196                 |             |            |             |           |
| [57959]ENERGY: 14330000 | 3656.3062   | 5893.3593  | 5910.9039   |           |
| 374.3469                | -15508.2386 | -1816.8182 | 0.0000      | 0.0000    |
| 8900.7596               | 7410.6191   | 332.0409   | -1490.1404  | 7482.2167 |
| 332.0547                | 11.4510     | -56.7053   | 664265.7895 | -0.5838   |
| -0.5894                 |             |            |             |           |
| [57995]ENERGY: 14340000 | 3636.2815   | 6029.0803  | 5932.3431   |           |
| 364.3351                | -15504.0732 | -1896.6763 | 0.0000      | 0.0000    |
| 8851.7855               | 7413.0761   | 330.2140   | -1438.7094  | 7481.8094 |
| 332.0598                | 153.3554    | 36.5934    | 664265.7895 | -6.7532   |
| -6.7617                 |             |            |             |           |
| [58045]ENERGY: 14350000 | 3688.3854   | 5840.5171  | 5907.5365   |           |
| 352.6211                | -15406.2496 | -1855.9452 | 0.0000      | 0.0000    |
| 8888.6496               | 7415.5151   | 331.5892   | -1473.1345  | 7482.5629 |
| 332.1261                | -29.5376    | -42.4757   | 664265.7895 | -3.8171   |
| -3.8158                 |             |            |             |           |
| [58081]ENERGY: 14360000 | 3713.1438   | 5868.6024  | 5964.6178   |           |
| 323.5900                | -15491.1380 | -1857.4626 | 0.0000      | 0.0000    |
| 8890.1442               | 7411.4977   | 331.6449   | -1478.6465  | 7483.2796 |
| 332.3072                | -33.5243    | -123.1800  | 664265.7895 | -4.7840   |
| -4.8001                 |             |            |             |           |
| [58131]ENERGY: 14370000 | 3626.1089   | 5932.4551  | 5948.1306   |           |
| 367.8540                | -15533.7348 | -1810.4022 | 0.0000      | 0.0000    |
| 8883.1529               | 7413.5646   | 331.3841   | -1469.5883  | 7483.4108 |
| 332.2149                | 5.9588      | -45.0189   | 664265.7895 | -9.3606   |
| -9.3379                 |             |            |             |           |
| [58167]ENERGY: 14380000 | 3584.9042   | 5860.3258  | 5908.2647   |           |
| 344.3782                | -15444.9249 | -1849.6369 | 0.0000      | 0.0000    |
| 9005.1572               | 7408.4683   | 335.9354   | -1596.6889  | 7483.4976 |
| 332.4000                | 125.7962    | -13.6701   | 664265.7895 | -2.0771   |
| -2.0944                 |             |            |             |           |
| [58217]ENERGY: 14390000 | 3629.6989   | 5855.8028  | 5889.5346   |           |
| 351.9480                | -15381.9165 | -1870.3952 | 0.0000      | 0.0000    |
| 8935.4903               | 7410.1630   | 333.3365   | -1525.3274  | 7484.1137 |
| 332.3916                | 116.7398    | -49.2294   | 664265.7895 | -5.5592   |
| -5.5532                 |             |            |             |           |
| [58256]ENERGY: 14400000 | 3650.3207   | 5859.4168  | 5898.7330   |           |
| 379.6401                | -15406.2097 | -1900.7853 | 0.0000      | 0.0000    |
| 8933.3776               | 7414.4933   | 333.2577   | -1518.8844  | 7484.4652 |
| 332.0281                | 22.2290     | -26.9255   | 664265.7895 | -4.0901   |
| -4.0783                 |             |            |             |           |
| [58306]ENERGY: 14410000 | 3635.7851   | 5923.5490  | 5884.6345   |           |
| 373.6349                | -15389.2153 | -1846.3289 | 0.0000      | 0.0000    |
| 8825.3628               | 7407.4221   | 329.2283   | -1417.9407  | 7483.4763 |
| 332.0783                | -76.1253    | -64.3974   | 664265.7895 | -2.9946   |
| -3.0071                 |             |            |             |           |
| [58342]ENERGY: 14420000 | 3581.5691   | 5915.1434  | 5948.7200   |           |
| 356.8379                | -15398.2910 | -1866.1589 | 0.0000      | 0.0000    |
| 8873.5024               | 7411.3230   | 331.0241   | -1462.1794  | 7483.4711 |
| 331.8581                | 63.5766     | 8.1620     | 664265.7895 | -0.1436   |
| -0.1225                 |             |            |             |           |

## Supplementary Text 6

|                         |             |            |             |           |
|-------------------------|-------------|------------|-------------|-----------|
| [58392]ENERGY: 14430000 | 3677.3468   | 5813.4105  | 5922.0250   |           |
| 349.7021                | -15449.0758 | -1807.7023 | 0.0000      | 0.0000    |
| 8906.6653               | 7412.3715   | 332.2612   | -1494.2937  | 7484.0738 |
| 331.7944                | -27.7721    | 19.4269    | 664265.7895 | -0.3537   |
| -0.3657                 |             |            |             |           |
| [58428]ENERGY: 14440000 | 3609.0907   | 5856.2442  | 5971.2647   |           |
| 361.7256                | -15485.4976 | -1850.2372 | 0.0000      | 0.0000    |
| 8954.4338               | 7417.0242   | 334.0432   | -1537.4096  | 7487.0859 |
| 332.0067                | 29.0515     | -6.5178    | 664265.7895 | -5.2772   |
| -5.2730                 |             |            |             |           |
| [58478]ENERGY: 14450000 | 3610.6578   | 5945.3878  | 5926.4353   |           |
| 359.0300                | -15393.5224 | -1878.4562 | 0.0000      | 0.0000    |
| 8845.5158               | 7415.0481   | 329.9801   | -1430.4677  | 7485.3347 |
| 331.8673                | 103.7887    | 108.1287   | 664265.7895 | -3.6070   |
| -3.6046                 |             |            |             |           |
| [58514]ENERGY: 14460000 | 3702.8271   | 5895.7865  | 5867.6811   |           |
| 366.4021                | -15393.7952 | -1851.3021 | 0.0000      | 0.0000    |
| 8829.1105               | 7416.7101   | 329.3681   | -1412.4005  | 7486.1407 |
| 331.8642                | 4.9249      | -25.2039   | 664265.7895 | -3.4945   |
| -3.4912                 |             |            |             |           |
| [58564]ENERGY: 14470000 | 3618.7790   | 5827.3232  | 5927.6265   |           |
| 367.0874                | -15468.9923 | -1813.9805 | 0.0000      | 0.0000    |
| 8955.4280               | 7413.2714   | 334.0803   | -1542.1567  | 7484.7981 |
| 331.8993                | 210.3503    | 174.3718   | 664265.7895 | -5.1872   |
| -5.1979                 |             |            |             |           |
| [58600]ENERGY: 14480000 | 3801.0030   | 5703.7419  | 5937.5182   |           |
| 344.6225                | -15408.2195 | -1897.5561 | 0.0000      | 0.0000    |
| 8933.7947               | 7414.9047   | 333.2733   | -1518.8900  | 7484.9742 |
| 332.1745                | -4.0515     | -52.4981   | 664265.7895 | -4.2048   |
| -4.2117                 |             |            |             |           |
| [58650]ENERGY: 14490000 | 3660.7424   | 5962.0163  | 5989.8720   |           |
| 340.5943                | -15471.7423 | -1880.9241 | 0.0000      | 0.0000    |
| 8815.8172               | 7416.3757   | 328.8722   | -1399.4415  | 7485.9406 |
| 332.1278                | -10.4776    | -115.0630  | 664265.7895 | -4.2620   |
| -4.2616                 |             |            |             |           |
| [58689]ENERGY: 14500000 | 3675.8426   | 5885.9136  | 5896.1810   |           |
| 361.6076                | -15393.4138 | -1914.4494 | 0.0000      | 0.0000    |
| 8901.0407               | 7412.7223   | 332.0514   | -1488.3184  | 7486.0654 |
| 332.1696                | -35.7280    | -124.3263  | 664265.7895 | -5.3454   |
| -5.3447                 |             |            |             |           |
| [58739]ENERGY: 14510000 | 3581.6267   | 5992.9859  | 5949.3265   |           |
| 375.5905                | -15507.1037 | -1834.8971 | 0.0000      | 0.0000    |
| 8856.6316               | 7414.1604   | 330.3947   | -1442.4711  | 7486.9467 |
| 332.1229                | 155.8683    | 116.5468   | 664265.7895 | -4.4943   |
| -4.4825                 |             |            |             |           |
| [58775]ENERGY: 14520000 | 3652.2594   | 5852.4970  | 5936.1066   |           |
| 363.3110                | -15446.5315 | -1793.7853 | 0.0000      | 0.0000    |
| 8854.6567               | 7418.5138   | 330.3211   | -1436.1429  | 7487.8771 |
| 332.2148                | 34.5715     | 14.3502    | 664265.7895 | -6.9301   |
| -6.9467                 |             |            |             |           |
| [58825]ENERGY: 14530000 | 3670.1131   | 5788.2864  | 5952.6867   |           |
| 370.5506                | -15352.7759 | -1902.7423 | 0.0000      | 0.0000    |
| 8891.4868               | 7417.6055   | 331.6950   | -1473.8812  | 7488.7623 |
| 332.3321                | -48.8184    | -142.6854  | 664265.7895 | -2.5278   |



Supplementary Text 6

-2.5198  
 [58861]ENERGY: 14540000      3615.1666      5817.6080      6003.4487  
 357.2778      -15495.0363      -1847.5834      0.0000      0.0000  
 8965.3100      7416.1916      334.4490      -1549.1184      7489.0390  
 332.2837      -58.3496      -35.0833      664265.7895      -2.4135  
 -2.4128  
 [58911]ENERGY: 14550000      3593.4419      5803.0716      5964.9959  
 371.6347      -15415.1389      -1890.0281      0.0000      0.0000  
 8986.0888      7414.0658      335.2241      -1572.0230      7488.2007  
 332.3697      87.7588      -1.1730      664265.7895      -1.7794  
 -1.7640  
 [58947]ENERGY: 14560000      3575.9792      5958.7393      5952.1943  
 383.8892      -15509.7212      -1840.1300      0.0000      0.0000  
 8894.3932      7415.3440      331.8034      -1479.0492      7488.1571  
 332.4633      -88.6291      -128.7898      664265.7895      -3.9900  
 -3.9951  
 [58997]ENERGY: 14570000      3574.0033      5885.2468      5941.1601  
 362.9325      -15362.9296      -1880.0032      0.0000      0.0000  
 8893.0963      7413.5062      331.7550      -1479.5901      7488.2120  
 332.3831      137.1353      63.6733      664265.7895      -3.0667  
 -3.0852  
 [59033]ENERGY: 14580000      3625.8368      5755.6355      5963.8194  
 350.8565      -15364.8565      -1833.4365      0.0000      0.0000  
 8917.0852      7414.9403      332.6499      -1502.1449      7488.2254  
 332.1893      -14.2947      -1.6332      664265.7895      -5.5319  
 -5.5060  
 [59083]ENERGY: 14590000      3623.7369      5924.6497      5931.9236  
 360.9673      -15392.5757      -1810.7836      0.0000      0.0000  
 8787.2637      7425.1819      327.8070      -1362.0818      7490.8893  
 332.4182      3.6754      -38.7575      664265.7895      -2.5110  
 -2.5091  
 [59122]ENERGY: 14600000      3563.7481      5872.6356      5904.8843  
 346.4157      -15425.7623      -1839.7367      0.0000      0.0000  
 8995.9777      7418.1624      335.5930      -1577.8153      7490.9702  
 332.5866      120.5344      10.3669      664265.7895      0.0370  
 0.0177  
 [59172]ENERGY: 14610000      3627.4973      5880.8166      5948.7782  
 337.5586      -15443.4946      -1883.6972      0.0000      0.0000  
 8951.0925      7418.5514      333.9186      -1532.5411      7489.0799  
 332.5947      -14.6241      3.7475      664265.7895      -1.7985  
 -1.8012  
 [59208]ENERGY: 14620000      3648.7296      5962.6710      5967.5959  
 370.6478      -15519.1437      -1911.0555      0.0000      0.0000  
 8898.8271      7418.2721      331.9688      -1480.5550      7491.2708  
 332.5800      -88.6830      -77.1643      664265.7895      -0.2109  
 -0.2040  
 [59258]ENERGY: 14630000      3608.4637      5960.1805      5914.5580  
 344.3536      -15410.1379      -1813.5802      0.0000      0.0000  
 8819.9153      7423.7530      329.0250      -1396.1623      7491.7571  
 332.4907      117.9995      47.2692      664265.7895      1.6588  
 1.6647  
 [59294]ENERGY: 14640000      3625.9162      5890.4532      5932.6023  
 376.6233      -15539.7547      -1790.9743      0.0000      0.0000  
 8922.9868      7417.8527      332.8701      -1505.1341      7490.4553

Supplementary Text 6

|                         |             |            |             |           |
|-------------------------|-------------|------------|-------------|-----------|
| 332.4764                | -65.2923    | -15.5578   | 664265.7895 | -2.7032   |
| -2.6935                 |             |            |             |           |
| [59344]ENERGY: 14650000 | 3652.7136   | 5899.0650  | 5881.1441   |           |
| 336.0292                | -15472.3615 | -1836.3147 | 0.0000      | 0.0000    |
| 8960.0032               | 7420.2789   | 334.2510   | -1539.7243  | 7492.0641 |
| 332.5772                | 25.4897     | 19.9100    | 664265.7895 | -0.3453   |
| -0.3546                 |             |            |             |           |
| [59380]ENERGY: 14660000 | 3566.9444   | 5957.0621  | 5857.1488   |           |
| 363.4951                | -15418.4487 | -1801.2171 | 0.0000      | 0.0000    |
| 8893.2596               | 7418.2442   | 331.7611   | -1475.0154  | 7491.4494 |
| 332.6769                | -15.2736    | -3.2490    | 664265.7895 | -7.9772   |
| -7.9951                 |             |            |             |           |
| [59430]ENERGY: 14670000 | 3599.6310   | 5827.3802  | 5927.5788   |           |
| 339.2783                | -15360.3768 | -1818.4094 | 0.0000      | 0.0000    |
| 8904.3707               | 7419.4529   | 332.1756   | -1484.9178  | 7492.0562 |
| 332.5391                | -35.6599    | -94.0652   | 664265.7895 | -3.6627   |
| -3.6490                 |             |            |             |           |
| [59466]ENERGY: 14680000 | 3630.0146   | 5944.2550  | 5921.6600   |           |
| 375.0673                | -15497.7956 | -1872.3135 | 0.0000      | 0.0000    |
| 8919.1803               | 7420.0681   | 332.7281   | -1499.1122  | 7492.3640 |
| 332.6462                | 29.6304     | -62.1446   | 664265.7895 | -4.3470   |
| -4.3484                 |             |            |             |           |
| [59516]ENERGY: 14690000 | 3634.2550   | 5844.2771  | 5877.5833   |           |
| 362.6788                | -15385.1027 | -1839.4410 | 0.0000      | 0.0000    |
| 8926.3511               | 7420.6016   | 332.9956   | -1505.7495  | 7492.6136 |
| 332.6427                | 211.0039    | 124.8456   | 664265.7895 | -3.0184   |
| -3.0332                 |             |            |             |           |
| [59555]ENERGY: 14700000 | 3640.2548   | 5835.1032  | 5893.8839   |           |
| 351.8339                | -15471.7114 | -1831.0660 | 0.0000      | 0.0000    |
| 9001.7955               | 7420.0939   | 335.8100   | -1581.7016  | 7492.1518 |
| 332.5776                | -106.7198   | -67.0014   | 664265.7895 | -3.3369   |
| -3.3272                 |             |            |             |           |
| [59605]ENERGY: 14710000 | 3604.3174   | 5924.3227  | 5875.6778   |           |
| 354.1386                | -15372.1034 | -1874.9387 | 0.0000      | 0.0000    |
| 8912.2265               | 7423.6409   | 332.4687   | -1488.5856  | 7493.0910 |
| 332.6181                | 1.7229      | 32.9771    | 664265.7895 | -4.5854   |
| -4.5803                 |             |            |             |           |
| [59641]ENERGY: 14720000 | 3604.5532   | 5912.4491  | 5950.0106   |           |
| 359.8858                | -15507.5485 | -1840.9237 | 0.0000      | 0.0000    |
| 8941.1735               | 7419.5999   | 333.5486   | -1521.5736  | 7493.2926 |
| 332.7986                | -23.1147    | -104.9516  | 664265.7895 | 0.8215    |
| 0.8167                  |             |            |             |           |
| [59691]ENERGY: 14730000 | 3644.3551   | 5902.0703  | 5931.8638   |           |
| 392.7918                | -15562.3468 | -1806.6311 | 0.0000      | 0.0000    |
| 8915.1012               | 7417.2043   | 332.5759   | -1497.8969  | 7493.1079 |
| 332.7041                | -25.4233    | 18.5729    | 664265.7895 | -4.9683   |
| -4.9494                 |             |            |             |           |
| [59727]ENERGY: 14740000 | 3628.0801   | 5843.2338  | 5919.4700   |           |
| 365.0679                | -15351.1648 | -1934.3781 | 0.0000      | 0.0000    |
| 8952.7169               | 7423.0258   | 333.9792   | -1529.6911  | 7494.6536 |
| 332.5957                | 34.6132     | -50.8368   | 664265.7895 | -6.9886   |
| -7.0112                 |             |            |             |           |
| [59777]ENERGY: 14750000 | 3654.8610   | 5852.5115  | 5958.9419   |           |
| 339.6935                | -15519.6257 | -1801.7411 | 0.0000      | 0.0000    |

## Supplementary Text 6

|                         |             |            |             |           |
|-------------------------|-------------|------------|-------------|-----------|
| 8936.1947               | 7420.8357   | 333.3628   | -1515.3590  | 7494.0145 |
| 332.7260                | 102.1260    | 14.5091    | 664265.7895 | -2.3770   |
| -2.3853                 |             |            |             |           |
| [59813]ENERGY: 14760000 | 3601.7636   | 5872.1147  | 5914.0196   |           |
| 357.5844                | -15385.4988 | -1850.7593 | 0.0000      | 0.0000    |
| 8912.4108               | 7421.6350   | 332.4756   | -1490.7758  | 7494.2272 |
| 332.7962                | 57.4680     | 47.2278    | 664265.7895 | -1.7054   |
| -1.6782                 |             |            |             |           |
| [59863]ENERGY: 14770000 | 3577.4344   | 5877.3151  | 5912.0313   |           |
| 359.0076                | -15359.6598 | -1907.6865 | 0.0000      | 0.0000    |
| 8964.7588               | 7423.2010   | 334.4284   | -1541.5578  | 7495.9185 |
| 332.5239                | 71.7202     | 6.3106     | 664265.7895 | -5.2346   |
| -5.2449                 |             |            |             |           |
| [59899]ENERGY: 14780000 | 3610.4109   | 5861.4715  | 5913.9198   |           |
| 340.4489                | -15390.9940 | -1865.3268 | 0.0000      | 0.0000    |
| 8954.5800               | 7424.5103   | 334.0487   | -1530.0697  | 7495.3708 |
| 332.5591                | -116.1977   | -68.1704   | 664265.7895 | -7.5251   |
| -7.5121                 |             |            |             |           |
| [59949]ENERGY: 14790000 | 3637.5769   | 5995.2295  | 5913.4205   |           |
| 344.2985                | -15452.6237 | -1877.2867 | 0.0000      | 0.0000    |
| 8865.0723               | 7425.6874   | 330.7096   | -1439.3849  | 7496.5692 |
| 332.6405                | 57.2967     | 25.9371    | 664265.7895 | -1.7200   |
| -1.7307                 |             |            |             |           |
| [59988]ENERGY: 14800000 | 3633.3657   | 5882.9050  | 5918.6359   |           |
| 359.0484                | -15399.4579 | -1842.7988 | 0.0000      | 0.0000    |
| 8875.3473               | 7427.0456   | 331.0929   | -1448.3017  | 7498.0807 |
| 332.4745                | 105.9246    | 15.9859    | 664265.7895 | -9.1073   |
| -9.1234                 |             |            |             |           |
| [60038]ENERGY: 14810000 | 3664.5908   | 5871.7164  | 5945.1379   |           |
| 348.4265                | -15549.5443 | -1792.8963 | 0.0000      | 0.0000    |
| 8938.9501               | 7426.3811   | 333.4656   | -1512.5690  | 7496.7346 |
| 332.8208                | 76.3374     | 56.1120    | 664265.7895 | -5.7474   |
| -5.7226                 |             |            |             |           |
| [60074]ENERGY: 14820000 | 3599.8279   | 5951.3137  | 5918.3513   |           |
| 361.3354                | -15485.9546 | -1908.8652 | 0.0000      | 0.0000    |
| 8987.4337               | 7423.4422   | 335.2743   | -1563.9914  | 7497.0097 |
| 332.9148                | 36.9631     | 35.4775    | 664265.7895 | -6.7683   |
| -6.7795                 |             |            |             |           |
| [60124]ENERGY: 14830000 | 3627.1968   | 5876.4189  | 5943.7009   |           |
| 362.5915                | -15457.8565 | -1820.1466 | 0.0000      | 0.0000    |
| 8895.9671               | 7427.8721   | 331.8621   | -1468.0950  | 7497.3790 |
| 332.8754                | -74.7058    | -13.2280   | 664265.7895 | -4.9868   |
| -4.9864                 |             |            |             |           |
| [60160]ENERGY: 14840000 | 3656.5210   | 5935.9603  | 5875.4322   |           |
| 343.0046                | -15479.2157 | -1846.5408 | 0.0000      | 0.0000    |
| 8939.4817               | 7424.6433   | 333.4854   | -1514.8384  | 7498.2476 |
| 332.8692                | 69.7381     | -0.5253    | 664265.7895 | -8.1440   |
| -8.1579                 |             |            |             |           |
| [60210]ENERGY: 14850000 | 3631.1100   | 6009.1267  | 5905.9570   |           |
| 367.2719                | -15563.3982 | -1883.8516 | 0.0000      | 0.0000    |
| 8956.3786               | 7422.5945   | 334.1158   | -1533.7841  | 7498.5500 |
| 332.7649                | -54.4422    | -28.2332   | 664265.7895 | -7.7982   |
| -7.7686                 |             |            |             |           |
| [60246]ENERGY: 14860000 | 3709.9472   | 5916.8646  | 5927.8957   |           |

Supplementary Text 6

|                         |             |            |             |           |
|-------------------------|-------------|------------|-------------|-----------|
| 383.2021                | -15547.0179 | -1867.5223 | 0.0000      | 0.0000    |
| 8901.6968               | 7425.0663   | 332.0759   | -1476.6305  | 7498.6184 |
| 332.8865                | 60.7489     | 79.5289    | 664265.7895 | -5.7442   |
| -5.7594                 |             |            |             |           |
| [60296]ENERGY: 14870000 | 3647.9911   | 5921.7373  | 5960.1783   |           |
| 372.5135                | -15430.9227 | -1831.2326 | 0.0000      | 0.0000    |
| 8791.0109               | 7431.2758   | 327.9468   | -1359.7352  | 7499.4672 |
| 332.6123                | 279.3686    | 93.4325    | 664265.7895 | -8.1985   |
| -8.2205                 |             |            |             |           |
| [60332]ENERGY: 14880000 | 3675.6731   | 5855.5907  | 5973.2693   |           |
| 350.8205                | -15477.9210 | -1861.8275 | 0.0000      | 0.0000    |
| 8912.1500               | 7427.7551   | 332.4658   | -1484.3949  | 7497.5793 |
| 332.6086                | 29.8163     | -37.8754   | 664265.7895 | -3.2766   |
| -3.2508                 |             |            |             |           |
| [60382]ENERGY: 14890000 | 3661.6292   | 5926.7867  | 5914.6688   |           |
| 353.9174                | -15412.2862 | -1868.3161 | 0.0000      | 0.0000    |
| 8850.2032               | 7426.6029   | 330.1549   | -1423.6003  | 7496.3180 |
| 332.8132                | 6.1394      | 20.2411    | 664265.7895 | -9.2841   |
| -9.2763                 |             |            |             |           |
| [60421]ENERGY: 14900000 | 3631.7793   | 5984.6174  | 5948.0197   |           |
| 358.8306                | -15450.3552 | -1857.2580 | 0.0000      | 0.0000    |
| 8813.0347               | 7428.6685   | 328.7684   | -1384.3662  | 7498.8659 |
| 332.7051                | -42.6556    | 1.8832     | 664265.7895 | -6.4220   |
| -6.4227                 |             |            |             |           |
| [60471]ENERGY: 14910000 | 3685.7583   | 5857.1957  | 5930.6108   |           |
| 347.3923                | -15433.7123 | -1845.3062 | 0.0000      | 0.0000    |
| 8883.5748               | 7425.5135   | 331.3998   | -1458.0614  | 7497.5918 |
| 332.4886                | 66.5124     | 2.6873     | 664265.7895 | -10.3190  |
| -10.3197                |             |            |             |           |
| [60507]ENERGY: 14920000 | 3706.4122   | 5952.0230  | 5903.4309   |           |
| 352.7657                | -15426.6394 | -1924.7636 | 0.0000      | 0.0000    |
| 8860.7091               | 7423.9379   | 330.5468   | -1436.7712  | 7498.1939 |
| 332.3818                | -218.3378   | -142.1077  | 664265.7895 | -8.3053   |
| -8.3179                 |             |            |             |           |
| [60557]ENERGY: 14930000 | 3657.8370   | 5916.1116  | 5931.6975   |           |
| 374.0043                | -15526.2039 | -1790.8875 | 0.0000      | 0.0000    |
| 8863.7969               | 7426.3558   | 330.6620   | -1437.4410  | 7498.6556 |
| 332.4278                | 22.1784     | 134.2302   | 664265.7895 | -7.3847   |
| -7.3847                 |             |            |             |           |
| [60593]ENERGY: 14940000 | 3658.1783   | 5842.6363  | 5922.0795   |           |
| 344.4695                | -15431.2796 | -1828.1877 | 0.0000      | 0.0000    |
| 8920.2706               | 7428.1669   | 332.7688   | -1492.1037  | 7500.5262 |
| 332.7337                | 93.2734     | 54.7151    | 664265.7895 | -6.7325   |
| -6.7319                 |             |            |             |           |
| [60643]ENERGY: 14950000 | 3579.8088   | 5764.7759  | 5973.3106   |           |
| 345.6111                | -15361.9071 | -1758.6109 | 0.0000      | 0.0000    |
| 8888.7746               | 7431.7629   | 331.5938   | -1457.0117  | 7500.8266 |
| 332.6612                | 108.6082    | 39.3496    | 664265.7895 | -7.6120   |
| -7.6182                 |             |            |             |           |
| [60679]ENERGY: 14960000 | 3707.8390   | 5923.8559  | 5961.0392   |           |
| 356.5699                | -15431.3820 | -1891.6869 | 0.0000      | 0.0000    |
| 8806.6054               | 7432.8405   | 328.5285   | -1373.7649  | 7503.3665 |
| 332.8801                | -188.2572   | -200.5972  | 664265.7895 | -7.3415   |
| -7.3333                 |             |            |             |           |

## Supplementary Text 6

|                         |             |            |             |
|-------------------------|-------------|------------|-------------|
| [60729]ENERGY: 14970000 | 3653.3089   | 5877.1048  | 5909.2002   |
| 337.0294                | -15527.9385 | -1806.9321 | 0.0000      |
| 8990.1962               | 7431.9690   | 335.3773   | -1558.2272  |
| 332.9243                | 56.8791     | 62.3913    | 664265.7895 |
| -0.6051                 |             |            | -0.5996     |
| [60765]ENERGY: 14980000 | 3599.2865   | 5864.1644  | 5910.1379   |
| 383.0584                | -15433.5443 | -1846.0779 | 0.0000      |
| 8956.9813               | 7434.0063   | 334.1383   | -1522.9750  |
| 332.9528                | 126.2506    | 35.4428    | 664265.7895 |
| -4.6588                 |             |            | -4.6612     |
| [60815]ENERGY: 14990000 | 3703.9875   | 5846.5948  | 5923.6897   |
| 382.9098                | -15546.4637 | -1797.2500 | 0.0000      |
| 8916.2895               | 7429.7576   | 332.6203   | -1486.5319  |
| 332.8429                | 228.3451    | 83.7771    | 664265.7895 |
| -8.9231                 |             |            | -8.9405     |
| [60854]ENERGY: 15000000 | 3579.3094   | 5826.6884  | 5898.5987   |
| 344.8933                | -15388.9867 | -1825.6618 | 0.0000      |
| 8993.2782               | 7428.1194   | 335.4923   | -1565.1588  |
| 332.9609                | 123.8898    | 17.0744    | 664265.7895 |
| 1.3843                  |             |            | 1.4008      |
| [60904]ENERGY: 15010000 | 3665.3753   | 5905.5143  | 5905.4174   |
| 361.3185                | -15535.4593 | -1823.1984 | 0.0000      |
| 8955.1957               | 7434.1635   | 334.0716   | -1521.0322  |
| 332.8802                | -26.0312    | -82.6003   | 664265.7895 |
| -2.9809                 |             |            | -2.9930     |
| [60940]ENERGY: 15020000 | 3625.0751   | 5844.4902  | 5892.4715   |
| 345.1185                | -15399.2124 | -1853.4528 | 0.0000      |
| 8975.4653               | 7429.9555   | 334.8278   | -1545.5099  |
| 332.7641                | 90.3407     | 54.5240    | 664265.7895 |
| -2.3929                 |             |            | -2.3700     |
| [60990]ENERGY: 15030000 | 3638.9971   | 5924.4745  | 5886.7043   |
| 395.8191                | -15385.3543 | -1818.0108 | 0.0000      |
| 8794.1063               | 7436.7361   | 328.0622   | -1357.3702  |
| 332.6273                | 16.6486     | 36.6710    | 664265.7895 |
| 0.2483                  |             |            | 0.2304      |
| [61026]ENERGY: 15040000 | 3628.4173   | 5827.1680  | 5887.3797   |
| 342.3372                | -15407.4496 | -1810.7610 | 0.0000      |
| 8964.4519               | 7431.5435   | 334.4169   | -1532.9084  |
| 332.5348                | -33.9350    | 13.7869    | 664265.7895 |
| -8.5799                 |             |            | -8.5727     |
| [61076]ENERGY: 15050000 | 3672.7952   | 5853.5125  | 5905.7352   |
| 353.6609                | -15380.8224 | -1883.2836 | 0.0000      |
| 8910.6670               | 7432.2649   | 332.4105   | -1478.4022  |
| 332.7253                | -110.9481   | -130.6888  | 664265.7895 |
| -1.9744                 |             |            | -1.9656     |
| [61112]ENERGY: 15060000 | 3628.4397   | 5998.7340  | 5898.7613   |
| 360.8084                | -15429.7298 | -1801.0368 | 0.0000      |
| 8785.1905               | 7441.1673   | 327.7296   | -1344.0233  |
| 332.7345                | 15.3538     | 66.8162    | 664265.7895 |
| -4.7923                 |             |            | -4.8177     |
| [61162]ENERGY: 15070000 | 3653.2489   | 5869.4294  | 5898.3330   |
| 362.9002                | -15462.7694 | -1892.1922 | 0.0000      |
| 9003.7021               | 7432.6521   | 335.8812   | -1571.0500  |
| 332.8117                | 40.5290     | -7.4400    | 664265.7895 |
|                         |             |            | -5.6596     |

Supplementary Text 6

-5.6741  
[61198]ENERGY: 15080000      3609.1090      5929.2592      5895.2676  
350.2768      -15378.8953      -1914.2545      0.0000      0.0000  
8941.1189      7431.8817      333.5465      -1509.2372      7507.7532  
332.8567      -59.9946      -52.4584      664265.7895      -10.8466  
-10.8437  
[61248]ENERGY: 15090000      3640.2960      5879.8121      5930.8512  
364.5932      -15514.5771      -1833.5852      0.0000      0.0000  
8967.6088      7434.9990      334.5347      -1532.6098      7505.8082  
332.6451      65.3640      75.5855      664265.7895      -8.1313  
-8.1311  
[61287]ENERGY: 15100000      3551.1906      5931.1006      5941.0403  
356.9475      -15394.9613      -1833.0677      0.0000      0.0000  
8883.0017      7435.2517      331.3785      -1447.7500      7505.4751  
332.7576      280.8260      269.4109      664265.7895      -9.3423  
-9.3343  
[61337]ENERGY: 15110000      3731.5972      5814.7046      5953.6711  
362.4280      -15423.4020      -1961.9561      0.0000      0.0000  
8957.0885      7434.1312      334.1423      -1522.9573      7506.6590  
332.6985      -239.0608      -193.6685      664265.7895      -3.6764  
-3.6979  
[61373]ENERGY: 15120000      3681.7122      5897.3775      5919.8385  
357.7177      -15479.1792      -1851.2805      0.0000      0.0000  
8912.4163      7438.6025      332.4758      -1473.8138      7508.1167  
332.7131      -64.5693      -64.3407      664265.7895      -5.4481  
-5.4381  
[61423]ENERGY: 15130000      3714.0078      5847.4099      5934.9544  
371.2214      -15496.6894      -1859.7679      0.0000      0.0000  
8925.1845      7436.3208      332.9521      -1488.8637      7508.1622  
332.7733      123.9662      19.6818      664265.7895      -5.1837  
-5.1917  
[61459]ENERGY: 15140000      3727.8242      5983.2776      5882.8660  
376.6234      -15535.6764      -1833.4409      0.0000      0.0000  
8837.2062      7438.6801      329.6701      -1398.5261      7508.6125  
332.9151      -235.7597      -243.6726      664265.7895      -7.6325  
-7.6366  
[61509]ENERGY: 15150000      3671.4202      5859.0866      5956.2158  
376.7650      -15467.7434      -1906.1389      0.0000      0.0000  
8945.6811      7435.2864      333.7167      -1510.3947      7508.2447  
333.0725      -200.7712      -107.2320      664265.7895      -5.2998  
-5.3066  
[61545]ENERGY: 15160000      3642.2563      5945.7703      5966.5320  
370.4030      -15433.3260      -1927.3907      0.0000      0.0000  
8871.9768      7436.2216      330.9672      -1435.7552      7509.5935  
332.7588      -84.0335      -133.9969      664265.7895      -5.5286  
-5.5120  
[61595]ENERGY: 15170000      3640.9993      5915.0853      5952.1545  
350.5507      -15459.8030      -1882.4140      0.0000      0.0000  
8916.4552      7433.0281      332.6264      -1483.4271      7509.2865  
333.0176      58.6823      34.3089      664265.7895      -4.9187  
-4.8880  
[61631]ENERGY: 15180000      3728.6729      5962.0760      5870.7079  
360.4781      -15576.8671      -1851.3374      0.0000      0.0000  
8942.6901      7436.4206      333.6051      -1506.2695      7510.1869

## Supplementary Text 6

|                         |             |            |             |           |
|-------------------------|-------------|------------|-------------|-----------|
| 333.0281                | 22.8782     | -23.2376   | 664265.7895 | -0.1648   |
| -0.1800                 |             |            |             |           |
| [61681]ENERGY: 15190000 | 3617.8183   | 5839.1662  | 5850.4720   |           |
| 370.4108                | -15443.5886 | -1815.9162 | 0.0000      | 0.0000    |
| 9020.9255               | 7439.2881   | 336.5237   | -1581.6374  | 7510.3696 |
| 333.0514                | 79.9076     | 51.3157    | 664265.7895 | -4.7174   |
| -4.7408                 |             |            |             |           |
| [61720]ENERGY: 15200000 | 3644.4772   | 5821.4593  | 5935.8251   |           |
| 353.7824                | -15438.8086 | -1799.9262 | 0.0000      | 0.0000    |
| 8921.9589               | 7438.7680   | 332.8318   | -1483.1909  | 7510.2712 |
| 333.0346                | 70.5489     | 44.9931    | 664265.7895 | -3.3895   |
| -3.3844                 |             |            |             |           |
| [61770]ENERGY: 15210000 | 3588.1344   | 5793.2432  | 5946.6006   |           |
| 337.6076                | -15423.2262 | -1843.7270 | 0.0000      | 0.0000    |
| 9038.9446               | 7437.5773   | 337.1959   | -1601.3673  | 7510.5249 |
| 332.8254                | -47.1161    | -36.7262   | 664265.7895 | -2.2968   |
| -2.2883                 |             |            |             |           |
| [61806]ENERGY: 15220000 | 3578.5461   | 5957.5811  | 5959.9859   |           |
| 347.1458                | -15494.0513 | -1872.4179 | 0.0000      | 0.0000    |
| 8960.3962               | 7437.1859   | 334.2657   | -1523.2103  | 7510.1758 |
| 333.0191                | 269.7543    | 128.9136   | 664265.7895 | -1.2756   |
| -1.2718                 |             |            |             |           |
| [61856]ENERGY: 15230000 | 3736.1078   | 5814.0889  | 5954.1751   |           |
| 369.4325                | -15500.3215 | -1856.9886 | 0.0000      | 0.0000    |
| 8920.1193               | 7436.6136   | 332.7631   | -1483.5057  | 7509.5376 |
| 333.0425                | -21.3732    | -47.2001   | 664265.7895 | -3.8917   |
| -3.8979                 |             |            |             |           |
| [61892]ENERGY: 15240000 | 3602.1232   | 5964.6139  | 5936.3896   |           |
| 368.5604                | -15514.9824 | -1854.6259 | 0.0000      | 0.0000    |
| 8935.1208               | 7437.1995   | 333.3228   | -1497.9213  | 7509.0654 |
| 332.9971                | 87.1982     | 39.9763    | 664265.7895 | -4.0471   |
| -4.0586                 |             |            |             |           |
| [61942]ENERGY: 15250000 | 3703.1889   | 5848.0191  | 5894.0660   |           |
| 367.2688                | -15422.7751 | -1815.0801 | 0.0000      | 0.0000    |
| 8866.7410               | 7441.4287   | 330.7719   | -1425.3123  | 7510.7358 |
| 333.2108                | -13.2736    | -36.2154   | 664265.7895 | -4.5005   |
| -4.4673                 |             |            |             |           |
| [61978]ENERGY: 15260000 | 3666.0237   | 5903.7703  | 5921.2867   |           |
| 368.8242                | -15497.6428 | -1914.3830 | 0.0000      | 0.0000    |
| 8987.6239               | 7435.5031   | 335.2814   | -1552.1208  | 7510.1904 |
| 333.2460                | -174.8391   | -129.7677  | 664265.7895 | -3.5392   |
| -3.5593                 |             |            |             |           |
| [62028]ENERGY: 15270000 | 3657.2912   | 5932.5311  | 5937.4647   |           |
| 359.3681                | -15422.7816 | -1936.4195 | 0.0000      | 0.0000    |
| 8909.6811               | 7437.1351   | 332.3737   | -1472.5460  | 7510.5254 |
| 333.1819                | -39.9908    | -50.3708   | 664265.7895 | -3.6561   |
| -3.6593                 |             |            |             |           |
| [62064]ENERGY: 15280000 | 3612.0798   | 5961.4344  | 5967.3088   |           |
| 350.4363                | -15527.5053 | -1849.1056 | 0.0000      | 0.0000    |
| 8928.5293               | 7443.1778   | 333.0769   | -1485.3515  | 7511.0139 |
| 333.2064                | 161.1685    | 59.5544    | 664265.7895 | -3.9260   |
| -3.9358                 |             |            |             |           |
| [62114]ENERGY: 15290000 | 3622.7362   | 5870.4943  | 5954.3526   |           |
| 339.0913                | -15421.6510 | -1893.6374 | 0.0000      | 0.0000    |

## Supplementary Text 6

|                         |             |            |             |           |
|-------------------------|-------------|------------|-------------|-----------|
| 8967.2420               | 7438.6279   | 334.5210   | -1528.6141  | 7513.6006 |
| 333.1721                | -71.7708    | -121.3850  | 664265.7895 | -0.0482   |
| -0.0266                 |             |            |             |           |
| [62153]ENERGY: 15300000 | 3643.9506   | 5919.4264  | 5954.1178   |           |
| 385.8401                | -15388.5666 | -1970.5992 | 0.0000      | 0.0000    |
| 8896.1524               | 7440.3215   | 331.8690   | -1455.8309  | 7513.3909 |
| 332.7940                | -224.0934   | -206.6769  | 664265.7895 | -8.3264   |
| -8.3352                 |             |            |             |           |
| [62203]ENERGY: 15310000 | 3610.8891   | 5765.1740  | 6005.4172   |           |
| 372.3471                | -15359.4692 | -1928.8169 | 0.0000      | 0.0000    |
| 8968.4821               | 7434.0233   | 334.5673   | -1534.4588  | 7511.1897 |
| 332.6685                | -194.7453   | -105.8080  | 664265.7895 | -8.9889   |
| -8.9903                 |             |            |             |           |
| [62239]ENERGY: 15320000 | 3638.0302   | 5850.2944  | 5976.8866   |           |
| 366.1704                | -15443.5907 | -1885.6997 | 0.0000      | 0.0000    |
| 8940.3103               | 7442.4014   | 333.5163   | -1497.9089  | 7511.6652 |
| 332.6985                | -130.6132   | -109.4648  | 664265.7895 | -5.8576   |
| -5.8696                 |             |            |             |           |
| [62289]ENERGY: 15330000 | 3622.9163   | 5949.1564  | 5927.7640   |           |
| 389.7353                | -15497.0878 | -1808.8935 | 0.0000      | 0.0000    |
| 8859.4993               | 7443.0899   | 330.5017   | -1416.4094  | 7512.0108 |
| 332.8302                | -97.7723    | -94.4341   | 664265.7895 | -9.1328   |
| -9.1254                 |             |            |             |           |
| [62325]ENERGY: 15340000 | 3648.7415   | 5949.8183  | 5967.3983   |           |
| 360.2351                | -15522.4683 | -1898.3177 | 0.0000      | 0.0000    |
| 8931.9127               | 7437.3199   | 333.2031   | -1494.5928  | 7511.3398 |
| 333.0518                | 206.6529    | 148.9852   | 664265.7895 | -10.0877  |
| -10.0894                |             |            |             |           |
| [62375]ENERGY: 15350000 | 3705.6463   | 5801.5516  | 5937.4173   |           |
| 359.4178                | -15368.6708 | -1911.0506 | 0.0000      | 0.0000    |
| 8916.6169               | 7440.9285   | 332.6325   | -1475.6884  | 7510.5364 |
| 332.8922                | 2.3315      | -76.1875   | 664265.7895 | -8.0189   |
| -8.0201                 |             |            |             |           |
| [62411]ENERGY: 15360000 | 3711.2579   | 5767.8115  | 5914.9326   |           |
| 353.3671                | -15466.2767 | -1796.6649 | 0.0000      | 0.0000    |
| 8953.4790               | 7437.9065   | 334.0076   | -1515.5725  | 7511.5823 |
| 332.7085                | -13.3442    | -47.7573   | 664265.7895 | -8.0803   |
| -8.0675                 |             |            |             |           |
| [62461]ENERGY: 15370000 | 3580.7730   | 5949.9589  | 5907.3620   |           |
| 374.7255                | -15372.8158 | -1920.1982 | 0.0000      | 0.0000    |
| 8917.8805               | 7437.6859   | 332.6796   | -1480.1946  | 7511.8112 |
| 332.8921                | 194.1353    | 79.7179    | 664265.7895 | -10.5693  |
| -10.6029                |             |            |             |           |
| [62497]ENERGY: 15380000 | 3649.4060   | 5925.5797  | 5943.7295   |           |
| 372.8722                | -15390.9191 | -1913.1065 | 0.0000      | 0.0000    |
| 8848.1676               | 7435.7294   | 330.0790   | -1412.4382  | 7510.9935 |
| 332.9847                | 8.9658      | -32.3343   | 664265.7895 | -10.9115  |
| -10.8921                |             |            |             |           |
| [62547]ENERGY: 15390000 | 3583.5313   | 5836.0638  | 5894.0109   |           |
| 348.7040                | -15358.8467 | -1846.2103 | 0.0000      | 0.0000    |
| 8981.1166               | 7438.3697   | 335.0386   | -1542.7469  | 7511.0890 |
| 332.9050                | 47.6878     | 6.5296     | 664265.7895 | -12.0488  |
| -12.0407                |             |            |             |           |
| [62586]ENERGY: 15400000 | 3637.4476   | 5971.7885  | 5936.7481   |           |



## Supplementary Text 6

|                         |             |            |             |           |
|-------------------------|-------------|------------|-------------|-----------|
| 365.6173                | -15435.0001 | -1961.8514 | 0.0000      | 0.0000    |
| 8925.8717               | 7440.6216   | 332.9777   | -1485.2501  | 7511.5026 |
| 332.8652                | 27.5688     | -60.6284   | 664265.7895 | -8.9552   |
| -8.9443                 |             |            |             |           |
| [62636]ENERGY: 15410000 | 3647.5067   | 5871.6841  | 5981.2603   |           |
| 372.8129                | -15568.8442 | -1846.9335 | 0.0000      | 0.0000    |
| 8979.9841               | 7437.4704   | 334.9964   | -1542.5137  | 7510.2932 |
| 332.9719                | -97.4297    | -23.3425   | 664265.7895 | -6.1321   |
| -6.1268                 |             |            |             |           |
| [62672]ENERGY: 15420000 | 3605.7090   | 5889.4316  | 5901.5264   |           |
| 367.2752                | -15421.0031 | -1876.9989 | 0.0000      | 0.0000    |
| 8972.9190               | 7438.8592   | 334.7328   | -1534.0597  | 7511.1948 |
| 332.9939                | -44.3406    | -67.3029   | 664265.7895 | -7.8859   |
| -7.9003                 |             |            |             |           |
| [62722]ENERGY: 15430000 | 3650.2359   | 5917.3167  | 5899.9013   |           |
| 333.2325                | -15417.2091 | -1830.4064 | 0.0000      | 0.0000    |
| 8887.5668               | 7440.6377   | 331.5488   | -1446.9291  | 7511.0932 |
| 333.0190                | 220.7487    | 143.8536   | 664265.7895 | -7.7598   |
| -7.7588                 |             |            |             |           |
| [62758]ENERGY: 15440000 | 3593.8846   | 5908.7963  | 5897.9523   |           |
| 363.2696                | -15334.9472 | -1822.2039 | 0.0000      | 0.0000    |
| 8835.3367               | 7442.0883   | 329.6003   | -1393.2484  | 7510.5488 |
| 332.7809                | -43.7760    | 36.5376    | 664265.7895 | -7.4602   |
| -7.4455                 |             |            |             |           |
| [62808]ENERGY: 15450000 | 3556.6473   | 5809.3319  | 5948.2605   |           |
| 376.4349                | -15466.6659 | -1839.9568 | 0.0000      | 0.0000    |
| 9053.6537               | 7437.7055   | 337.7446   | -1615.9482  | 7512.0702 |
| 332.7033                | 43.7323     | -44.3706   | 664265.7895 | -12.0501  |
| -12.0602                |             |            |             |           |
| [62844]ENERGY: 15460000 | 3660.9649   | 5951.3507  | 5931.0106   |           |
| 380.1896                | -15490.7543 | -1899.5064 | 0.0000      | 0.0000    |
| 8908.3250               | 7441.5801   | 332.3231   | -1466.7449  | 7512.3052 |
| 332.9424                | 71.7186     | -19.3258   | 664265.7895 | -13.3691  |
| -13.3638                |             |            |             |           |
| [62894]ENERGY: 15470000 | 3693.9789   | 5740.2033  | 5959.4745   |           |
| 363.9530                | -15425.0368 | -1866.6336 | 0.0000      | 0.0000    |
| 8974.0992               | 7440.0384   | 334.7768   | -1534.0608  | 7512.2972 |
| 333.0441                | 22.8454     | 57.5977    | 664265.7895 | -9.2323   |
| -9.2258                 |             |            |             |           |
| [62930]ENERGY: 15480000 | 3621.2742   | 5917.0144  | 5903.2945   |           |
| 382.7607                | -15473.7708 | -1747.9689 | 0.0000      | 0.0000    |
| 8841.2323               | 7443.8363   | 329.8203   | -1397.3960  | 7512.4983 |
| 333.0376                | 4.9074      | -2.3758    | 664265.7895 | -9.6967   |
| -9.7154                 |             |            |             |           |
| [62980]ENERGY: 15490000 | 3628.8409   | 5923.0305  | 5946.6354   |           |
| 346.5010                | -15448.1531 | -1878.9477 | 0.0000      | 0.0000    |
| 8922.4468               | 7440.3538   | 332.8500   | -1482.0930  | 7513.3556 |
| 333.0289                | 25.6213     | 50.5152    | 664265.7895 | -6.6570   |
| -6.6466                 |             |            |             |           |
| [63019]ENERGY: 15500000 | 3666.8998   | 5867.2240  | 5887.6010   |           |
| 351.8047                | -15491.7325 | -1823.3540 | 0.0000      | 0.0000    |
| 8981.8961               | 7440.3391   | 335.0677   | -1541.5571  | 7513.0543 |
| 332.9847                | 0.7330      | 37.3484    | 664265.7895 | -7.1050   |
| -7.1080                 |             |            |             |           |

## Supplementary Text 6

|                         |             |            |             |
|-------------------------|-------------|------------|-------------|
| [63069]ENERGY: 15510000 | 3679.9231   | 5833.6998  | 5935.7491   |
| 368.4954                | -15358.0974 | -1983.4226 | 0.0000      |
| 8962.5729               | 7438.9201   | 334.3468   | -1523.6527  |
| 333.2681                | -235.9473   | -225.4458  | 664265.7895 |
| -6.7049                 |             |            | -6.7050     |
| [63105]ENERGY: 15520000 | 3629.7794   | 5839.7871  | 5965.4298   |
| 367.8300                | -15468.9822 | -1815.2625 | 0.0000      |
| 8926.8806               | 7445.4623   | 333.0154   | -1481.4183  |
| 333.0646                | 143.4530    | 120.3721   | 664265.7895 |
| -7.7673                 |             |            | -7.7590     |
| [63155]ENERGY: 15530000 | 3634.6468   | 5893.0712  | 5942.1667   |
| 355.9855                | -15496.8010 | -1893.0944 | 0.0000      |
| 9003.2359               | 7439.2108   | 335.8638   | -1564.0252  |
| 333.1245                | 147.2982    | 77.1738    | 664265.7895 |
| -4.2121                 |             |            | -4.2328     |
| [63191]ENERGY: 15540000 | 3669.9581   | 5904.8830  | 5926.4283   |
| 364.1926                | -15505.2519 | -1827.6636 | 0.0000      |
| 8912.2567               | 7444.8031   | 332.4698   | -1467.4536  |
| 333.0443                | -7.3435     | 1.7662     | 664265.7895 |
| -7.0560                 |             |            | -7.0407     |
| [63241]ENERGY: 15550000 | 3599.6060   | 5900.5438  | 5962.9171   |
| 358.1340                | -15374.3034 | -1887.2381 | 0.0000      |
| 8887.5597               | 7447.2191   | 331.5485   | -1440.3406  |
| 332.8460                | -13.4173    | -30.5835   | 664265.7895 |
| -10.9402                |             |            | -10.9526    |
| [63277]ENERGY: 15560000 | 3660.5021   | 5880.6871  | 5950.2474   |
| 364.0011                | -15418.7213 | -1887.6365 | 0.0000      |
| 8898.1582               | 7447.2380   | 331.9439   | -1450.9202  |
| 332.9794                | -64.4739    | -65.0724   | 664265.7895 |
| -4.6772                 |             |            | -4.6507     |
| [63327]ENERGY: 15570000 | 3630.7549   | 6007.9696  | 5926.3695   |
| 353.8541                | -15527.9315 | -1842.0360 | 0.0000      |
| 8899.5079               | 7448.4885   | 331.9942   | -1451.0194  |
| 333.0631                | 244.2767    | 131.3167   | 664265.7895 |
| -2.9343                 |             |            | -2.9201     |
| [63363]ENERGY: 15580000 | 3693.4091   | 5872.6065  | 5932.2387   |
| 354.9217                | -15430.7948 | -1872.8025 | 0.0000      |
| 8900.2622               | 7449.8410   | 332.0224   | -1450.4211  |
| 332.9813                | 57.7922     | 26.3131    | 664265.7895 |
| -5.0204                 |             |            | -5.0267     |
| [63413]ENERGY: 15590000 | 3653.6087   | 5890.3336  | 5895.2481   |
| 354.1571                | -15419.9748 | -1811.2081 | 0.0000      |
| 8883.2268               | 7445.3915   | 331.3869   | -1437.8354  |
| 332.7497                | 155.9857    | 130.8498   | 664265.7895 |
| -6.4843                 |             |            | -6.5035     |
| [63452]ENERGY: 15600000 | 3617.8980   | 5923.2969  | 5895.9774   |
| 366.7753                | -15455.5585 | -1875.7074 | 0.0000      |
| 8970.1747               | 7442.8565   | 334.6304   | -1527.3182  |
| 332.9373                | -126.2962   | -141.8031  | 664265.7895 |
| -5.5333                 |             |            | -5.5078     |
| [63502]ENERGY: 15610000 | 3562.3626   | 5938.7000  | 5985.8826   |
| 381.1757                | -15564.2404 | -1794.4369 | 0.0000      |
| 8933.0754               | 7442.5190   | 333.2465   | -1490.5563  |
| 332.8756                | 81.4851     | 51.0855    | 664265.7895 |
|                         |             |            | -3.3967     |

## Supplementary Text 6

-3.3765

|                         |             |            |             |
|-------------------------|-------------|------------|-------------|
| [63538]ENERGY: 15620000 | 3693.3654   | 5760.5145  | 5878.1213   |
| 353.1095                | -15415.0938 | -1863.0260 | 0.0000      |
| 9037.1048               | 7444.0957   | 337.1272   | -1593.0091  |
| 332.8918                | 30.1803     | 56.2442    | 664265.7895 |

-5.3860

|                         |             |            |             |
|-------------------------|-------------|------------|-------------|
| [63588]ENERGY: 15630000 | 3582.0096   | 5837.4454  | 5907.3600   |
| 364.4975                | -15351.9874 | -1867.2747 | 0.0000      |
| 8973.9858               | 7446.0362   | 334.7726   | -1527.9496  |
| 332.7061                | -12.3516    | -58.8957   | 664265.7895 |

-6.6136

|                         |             |            |             |
|-------------------------|-------------|------------|-------------|
| [63624]ENERGY: 15640000 | 3637.8145   | 5869.2817  | 5983.7419   |
| 356.6649                | -15480.1652 | -1853.3642 | 0.0000      |
| 8931.6401               | 7445.6137   | 333.1929   | -1486.0264  |
| 332.9143                | 44.2056     | 101.7422   | 664265.7895 |

-5.6550

|                         |             |            |             |
|-------------------------|-------------|------------|-------------|
| [63674]ENERGY: 15650000 | 3712.8472   | 5917.8392  | 5876.1376   |
| 350.2805                | -15469.5075 | -1916.7114 | 0.0000      |
| 8974.9698               | 7445.8555   | 334.8093   | -1529.1142  |
| 332.8552                | -76.2375    | -1.4368    | 664265.7895 |

-7.1631

|                         |             |            |             |
|-------------------------|-------------|------------|-------------|
| [63710]ENERGY: 15660000 | 3645.3857   | 5940.4181  | 5908.4897   |
| 373.2785                | -15448.9985 | -1840.3125 | 0.0000      |
| 8870.6051               | 7448.8662   | 330.9160   | -1421.7388  |
| 332.8717                | -91.3323    | -167.9048  | 664265.7895 |

-3.6886

|                         |             |            |             |
|-------------------------|-------------|------------|-------------|
| [63760]ENERGY: 15670000 | 3728.1424   | 5799.6118  | 5930.3176   |
| 334.8939                | -15383.8416 | -1833.8859 | 0.0000      |
| 8873.9116               | 7449.1498   | 331.0394   | -1424.7618  |
| 332.6561                | -150.9629   | -162.7995  | 664265.7895 |

-0.2784

|                         |             |            |             |
|-------------------------|-------------|------------|-------------|
| [63796]ENERGY: 15680000 | 3599.5108   | 5912.5888  | 5825.5234   |
| 348.1373                | -15387.6036 | -1936.9168 | 0.0000      |
| 9085.2063               | 7446.4462   | 338.9217   | -1638.7601  |
| 332.6682                | -33.2376    | -58.9647   | 664265.7895 |

-6.1348

|                         |             |            |             |
|-------------------------|-------------|------------|-------------|
| [63846]ENERGY: 15690000 | 3627.1649   | 5743.8460  | 5935.0061   |
| 358.5029                | -15484.1254 | -1764.1905 | 0.0000      |
| 9027.3243               | 7443.5283   | 336.7624   | -1583.7960  |
| 332.5011                | 178.3470    | 116.2660   | 664265.7895 |

-3.5710

|                         |             |            |             |
|-------------------------|-------------|------------|-------------|
| [63885]ENERGY: 15700000 | 3649.1261   | 5919.8434  | 5876.5930   |
| 367.2613                | -15458.3231 | -1773.0912 | 0.0000      |
| 8864.8588               | 7446.2683   | 330.7016   | -1418.5905  |
| 332.6342                | 103.2678    | 46.0631    | 664265.7895 |

-8.5554

|                         |             |            |             |
|-------------------------|-------------|------------|-------------|
| [63935]ENERGY: 15710000 | 3586.1954   | 5877.4642  | 5903.5264   |
| 380.6380                | -15385.3621 | -1915.1489 | 0.0000      |
| 9000.0953               | 7447.4084   | 335.7466   | -1552.6869  |
| 332.8439                | 92.5215     | 33.2523    | 664265.7895 |

-5.1113

|                         |             |            |            |
|-------------------------|-------------|------------|------------|
| [63971]ENERGY: 15720000 | 3572.1528   | 6025.6334  | 5896.3147  |
| 366.2646                | -15462.8748 | -1842.4766 | 0.0000     |
| 8893.9000               | 7448.9141   | 331.7850   | -1444.9859 |
|                         |             |            | 7519.3396  |

## Supplementary Text 6

|                         |             |            |             |           |
|-------------------------|-------------|------------|-------------|-----------|
| 333.0000                | -44.5240    | -24.1636   | 664265.7895 | -8.5919   |
| -8.5690                 |             |            |             |           |
| [64021]ENERGY: 15730000 | 3698.0913   | 5794.4517  | 5977.7251   |           |
| 348.5598                | -15467.3815 | -1802.3237 | 0.0000      | 0.0000    |
| 8899.4814               | 7448.6042   | 331.9932   | -1450.8772  | 7519.5402 |
| 332.9490                | -129.8097   | -42.0717   | 664265.7895 | -4.2632   |
| -4.2528                 |             |            |             |           |
| [64057]ENERGY: 15740000 | 3713.5032   | 5854.1828  | 5935.7900   |           |
| 374.0900                | -15484.8662 | -1815.3530 | 0.0000      | 0.0000    |
| 8875.4602               | 7452.8070   | 331.0971   | -1422.6532  | 7519.7224 |
| 333.0909                | -80.4266    | -166.8890  | 664265.7895 | -6.4489   |
| -6.4728                 |             |            |             |           |
| [64107]ENERGY: 15750000 | 3604.0915   | 5890.2730  | 5932.1947   |           |
| 362.7615                | -15381.3970 | -1889.7763 | 0.0000      | 0.0000    |
| 8929.9840               | 7448.1314   | 333.1311   | -1481.8526  | 7519.9713 |
| 333.1639                | 28.5057     | -4.1746    | 664265.7895 | -6.4904   |
| -6.4839                 |             |            |             |           |
| [64143]ENERGY: 15760000 | 3664.6845   | 5887.1637  | 5954.3125   |           |
| 347.8200                | -15459.3929 | -1832.0076 | 0.0000      | 0.0000    |
| 8886.0433               | 7448.6234   | 331.4919   | -1437.4198  | 7519.3407 |
| 333.0585                | -23.5150    | -22.6742   | 664265.7895 | -3.4199   |
| -3.4076                 |             |            |             |           |
| [64193]ENERGY: 15770000 | 3634.4046   | 5906.4804  | 5950.0365   |           |
| 347.7273                | -15381.4472 | -1864.1581 | 0.0000      | 0.0000    |
| 8857.0079               | 7450.0514   | 330.4088   | -1406.9565  | 7520.5245 |
| 333.2548                | -89.9362    | -71.0519   | 664265.7895 | -7.1162   |
| -7.1205                 |             |            |             |           |
| [64229]ENERGY: 15780000 | 3599.3141   | 5940.2668  | 5977.1693   |           |
| 346.3429                | -15446.2842 | -1883.6087 | 0.0000      | 0.0000    |
| 8914.0338               | 7447.2340   | 332.5361   | -1466.7998  | 7520.2118 |
| 333.2574                | 10.8233     | 124.3234   | 664265.7895 | -6.5073   |
| -6.5083                 |             |            |             |           |
| [64279]ENERGY: 15790000 | 3660.1721   | 5932.1815  | 5960.6099   |           |
| 374.8318                | -15477.4790 | -1838.1937 | 0.0000      | 0.0000    |
| 8837.0184               | 7449.1410   | 329.6631   | -1387.8774  | 7519.8462 |
| 333.3905                | -121.2841   | -65.1886   | 664265.7895 | -5.2780   |
| -5.2694                 |             |            |             |           |
| [64318]ENERGY: 15800000 | 3564.3325   | 5917.6846  | 5985.3443   |           |
| 371.8477                | -15389.3285 | -1924.0684 | 0.0000      | 0.0000    |
| 8920.5229               | 7446.3350   | 332.7782   | -1474.1878  | 7521.3393 |
| 333.1218                | -54.3730    | -62.4441   | 664265.7895 | -3.5875   |
| -3.6018                 |             |            |             |           |
| [64368]ENERGY: 15810000 | 3645.5511   | 5946.2866  | 5954.2973   |           |
| 363.0974                | -15448.9589 | -1904.3304 | 0.0000      | 0.0000    |
| 8893.9295               | 7449.8726   | 331.7861   | -1444.0569  | 7520.4120 |
| 333.0675                | 110.9785    | 85.4082    | 664265.7895 | -3.9953   |
| -3.9935                 |             |            |             |           |
| [64404]ENERGY: 15820000 | 3661.2871   | 5994.2288  | 5874.7468   |           |
| 382.4247                | -15407.8356 | -1855.7552 | 0.0000      | 0.0000    |
| 8803.0835               | 7452.1800   | 328.3971   | -1350.9034  | 7521.2393 |
| 333.1437                | -60.1367    | -29.3940   | 664265.7895 | -2.0273   |
| -2.0302                 |             |            |             |           |
| [64454]ENERGY: 15830000 | 3590.5576   | 5879.9737  | 5929.1146   |           |
| 365.3373                | -15415.4597 | -1885.6604 | 0.0000      | 0.0000    |

## Supplementary Text 6

|                         |             |            |             |           |
|-------------------------|-------------|------------|-------------|-----------|
| 8984.0954               | 7447.9586   | 335.1497   | -1536.1368  | 7519.8512 |
| 333.1529                | -144.7217   | -49.0589   | 664265.7895 | -6.8108   |
| -6.7916                 |             |            |             |           |
| [64490]ENERGY: 15840000 | 3660.6783   | 5842.6709  | 5928.2073   |           |
| 350.6279                | -15507.7002 | -1822.1528 | 0.0000      | 0.0000    |
| 8995.9164               | 7448.2479   | 335.5907   | -1547.6685  | 7521.9482 |
| 333.1837                | 35.8768     | -49.9185   | 664265.7895 | -4.5874   |
| -4.6196                 |             |            |             |           |
| [64540]ENERGY: 15850000 | 3698.5421   | 5931.6414  | 5919.4169   |           |
| 368.4598                | -15505.4164 | -1825.8163 | 0.0000      | 0.0000    |
| 8865.5094               | 7452.3368   | 330.7259   | -1413.1725  | 7521.6871 |
| 332.9401                | -9.3284     | -24.4751   | 664265.7895 | -6.7202   |
| -6.7102                 |             |            |             |           |
| [64576]ENERGY: 15860000 | 3574.8563   | 5887.9288  | 5894.4754   |           |
| 369.9839                | -15455.3519 | -1805.3563 | 0.0000      | 0.0000    |
| 8982.9418               | 7449.4780   | 335.1067   | -1533.4638  | 7521.7479 |
| 333.0470                | 16.4702     | -28.5947   | 664265.7895 | -5.5691   |
| -5.5711                 |             |            |             |           |
| [64626]ENERGY: 15870000 | 3657.5990   | 5824.3244  | 5985.5087   |           |
| 359.4413                | -15401.7705 | -1887.2011 | 0.0000      | 0.0000    |
| 8912.6036               | 7450.5054   | 332.4828   | -1462.0982  | 7521.6295 |
| 332.9169                | 64.2917     | -23.1492   | 664265.7895 | -9.4217   |
| -9.4165                 |             |            |             |           |
| [64662]ENERGY: 15880000 | 3678.3197   | 5837.0460  | 5947.3495   |           |
| 364.2363                | -15468.5862 | -1818.8495 | 0.0000      | 0.0000    |
| 8909.1307               | 7448.6464   | 332.3532   | -1460.4843  | 7521.8642 |
| 332.8330                | 50.3786     | -10.2500   | 664265.7895 | -7.6310   |
| -7.6345                 |             |            |             |           |
| [64712]ENERGY: 15890000 | 3655.7551   | 6031.8373  | 5904.0964   |           |
| 357.0183                | -15407.2046 | -1908.4651 | 0.0000      | 0.0000    |
| 8820.1198               | 7453.1572   | 329.0327   | -1366.9626  | 7522.7677 |
| 332.8140                | 79.2979     | -12.1261   | 664265.7895 | -5.5904   |
| -5.5936                 |             |            |             |           |
| [64751]ENERGY: 15900000 | 3564.5792   | 5921.4084  | 6003.5943   |           |
| 370.9568                | -15487.0559 | -1855.9461 | 0.0000      | 0.0000    |
| 8934.2967               | 7451.8335   | 333.2920   | -1482.4632  | 7523.8747 |
| 332.8147                | -8.8147     | 40.4657    | 664265.7895 | -6.2972   |
| -6.2712                 |             |            |             |           |
| [64801]ENERGY: 15910000 | 3576.5322   | 5900.6289  | 5962.8565   |           |
| 363.3823                | -15390.8215 | -1894.7723 | 0.0000      | 0.0000    |
| 8933.0744               | 7450.8805   | 333.2464   | -1482.1939  | 7523.8977 |
| 333.0776                | 111.1002    | 74.0687    | 664265.7895 | -2.6612   |
| -2.6863                 |             |            |             |           |
| [64837]ENERGY: 15920000 | 3614.1742   | 5820.3977  | 5913.6919   |           |
| 364.2631                | -15375.5236 | -1887.2732 | 0.0000      | 0.0000    |
| 8999.4732               | 7449.2032   | 335.7234   | -1550.2700  | 7524.7833 |
| 333.2117                | -88.6005    | -49.2232   | 664265.7895 | -6.0121   |
| -6.0089                 |             |            |             |           |
| [64887]ENERGY: 15930000 | 3775.7032   | 5888.0436  | 5938.1765   |           |
| 370.1027                | -15568.7283 | -1824.2456 | 0.0000      | 0.0000    |
| 8875.7465               | 7454.7986   | 331.1078   | -1420.9479  | 7525.4805 |
| 333.1455                | 43.9309     | 58.7251    | 664265.7895 | -9.6042   |
| -9.5898                 |             |            |             |           |
| [64923]ENERGY: 15940000 | 3582.3410   | 5902.7343  | 5950.2543   |           |

## Supplementary Text 6

|                         |             |            |             |           |
|-------------------------|-------------|------------|-------------|-----------|
| 384.8389                | -15387.1551 | -1896.6357 | 0.0000      | 0.0000    |
| 8919.1238               | 7455.5015   | 332.7260   | -1463.6223  | 7524.8507 |
| 333.2341                | 207.2201    | 61.6280    | 664265.7895 | -3.7805   |
| -3.7933                 |             |            |             |           |
| [64973]ENERGY: 15950000 | 3595.7121   | 5899.8059  | 5952.1807   |           |
| 366.1887                | -15352.3283 | -1902.6613 | 0.0000      | 0.0000    |
| 8895.3906               | 7454.2885   | 331.8406   | -1441.1021  | 7524.2914 |
| 333.2039                | 52.6098     | 1.7320     | 664265.7895 | -6.6541   |
| -6.6596                 |             |            |             |           |
| [65009]ENERGY: 15960000 | 3623.4606   | 5820.6754  | 5947.4504   |           |
| 368.3391                | -15493.4694 | -1781.3793 | 0.0000      | 0.0000    |
| 8968.3817               | 7453.4583   | 334.5635   | -1514.9233  | 7525.2013 |
| 333.2761                | 151.1415    | 97.5608    | 664265.7895 | -4.7580   |
| -4.7469                 |             |            |             |           |
| [65059]ENERGY: 15970000 | 3582.5819   | 5848.4115  | 5951.5989   |           |
| 360.1150                | -15339.5949 | -1913.9341 | 0.0000      | 0.0000    |
| 8963.7531               | 7452.9314   | 334.3909   | -1510.8217  | 7526.4802 |
| 333.3625                | 31.5163     | -22.7075   | 664265.7895 | -7.5168   |
| -7.5238                 |             |            |             |           |
| [65095]ENERGY: 15980000 | 3646.8313   | 5844.5252  | 5970.6754   |           |
| 371.3356                | -15427.4861 | -1878.7066 | 0.0000      | 0.0000    |
| 8927.3066               | 7454.4815   | 333.0313   | -1472.8251  | 7524.9489 |
| 332.9164                | 76.2199     | 14.4356    | 664265.7895 | -7.2811   |
| -7.2722                 |             |            |             |           |
| [65145]ENERGY: 15990000 | 3583.6021   | 5869.8391  | 5958.5464   |           |
| 361.5673                | -15302.8759 | -1856.5885 | 0.0000      | 0.0000    |
| 8838.5167               | 7452.6072   | 329.7190   | -1385.9095  | 7524.9724 |
| 332.9958                | 11.8001     | -81.5972   | 664265.7895 | -4.0045   |
| -4.0073                 |             |            |             |           |
| [65184]ENERGY: 16000000 | 3639.9152   | 5933.1749  | 5935.5676   |           |
| 383.1646                | -15366.9581 | -1953.0877 | 0.0000      | 0.0000    |
| 8880.3636               | 7452.1399   | 331.2801   | -1428.2236  | 7524.4069 |
| 333.1156                | 26.2003     | 62.6937    | 664265.7895 | -6.8910   |
| -6.8819                 |             |            |             |           |
| [65234]ENERGY: 16010000 | 3639.1169   | 5910.9713  | 5963.5354   |           |
| 370.8786                | -15443.3463 | -1925.3145 | 0.0000      | 0.0000    |
| 8938.2829               | 7454.1242   | 333.4407   | -1484.1587  | 7525.7391 |
| 333.3839                | -44.4023    | -111.2903  | 664265.7895 | -5.0642   |
| -5.0745                 |             |            |             |           |
| [65270]ENERGY: 16020000 | 3623.2451   | 5848.3939  | 5872.3282   |           |
| 361.7488                | -15350.4843 | -1867.9382 | 0.0000      | 0.0000    |
| 8962.9073               | 7450.2008   | 334.3593   | -1512.7065  | 7526.0120 |
| 333.0329                | 108.6205    | 51.6093    | 664265.7895 | -7.9618   |
| -7.9723                 |             |            |             |           |
| [65320]ENERGY: 16030000 | 3637.8033   | 5897.1947  | 5965.7818   |           |
| 361.4294                | -15471.2846 | -1802.9028 | 0.0000      | 0.0000    |
| 8870.9824               | 7459.0040   | 330.9301   | -1411.9784  | 7527.5637 |
| 332.8398                | -30.3167    | -0.8619    | 664265.7895 | -3.7692   |
| -3.7519                 |             |            |             |           |
| [65356]ENERGY: 16040000 | 3651.3784   | 5921.4182  | 5966.9060   |           |
| 367.5195                | -15473.1131 | -1829.4012 | 0.0000      | 0.0000    |
| 8852.0930               | 7456.8008   | 330.2254   | -1395.2923  | 7526.8462 |
| 332.9708                | -15.1219    | 26.0257    | 664265.7895 | -9.9867   |
| -9.9978                 |             |            |             |           |

## Supplementary Text 6

|                         |             |            |             |           |
|-------------------------|-------------|------------|-------------|-----------|
| [65406]ENERGY: 16050000 | 3609.8844   | 5932.6081  | 5956.0054   |           |
| 390.4379                | -15482.1731 | -1888.5607 | 0.0000      | 0.0000    |
| 8935.8859               | 7454.0879   | 333.3513   | -1481.7980  | 7526.2332 |
| 333.0666                | 19.8801     | 7.7505     | 664265.7895 | -9.3361   |
| -9.3186                 |             |            |             |           |
| [65442]ENERGY: 16060000 | 3675.1562   | 5894.4940  | 5951.9086   |           |
| 377.4238                | -15508.2525 | -1819.9376 | 0.0000      | 0.0000    |
| 8886.3353               | 7457.1277   | 331.5028   | -1429.2076  | 7526.7136 |
| 333.1705                | 84.4461     | 30.8216    | 664265.7895 | -4.6795   |
| -4.6815                 |             |            |             |           |
| [65492]ENERGY: 16070000 | 3694.3871   | 5868.1430  | 5927.1916   |           |
| 351.9629                | -15452.5548 | -1881.5564 | 0.0000      | 0.0000    |
| 8946.9828               | 7454.5562   | 333.7653   | -1492.4266  | 7527.3900 |
| 332.8750                | -51.1254    | -46.6846   | 664265.7895 | -6.5457   |
| -6.5338                 |             |            |             |           |
| [65528]ENERGY: 16080000 | 3632.0868   | 5918.3978  | 5942.5902   |           |
| 384.7803                | -15441.4034 | -1910.2797 | 0.0000      | 0.0000    |
| 8929.2829               | 7455.4550   | 333.1050   | -1473.8279  | 7529.7895 |
| 333.0418                | 54.1016     | 103.9005   | 664265.7895 | -4.8909   |
| -4.9239                 |             |            |             |           |
| [65578]ENERGY: 16090000 | 3582.6543   | 5897.0631  | 5924.6253   |           |
| 365.6468                | -15417.1522 | -1915.2604 | 0.0000      | 0.0000    |
| 9020.9107               | 7458.4877   | 336.5231   | -1562.4231  | 7527.4587 |
| 332.9667                | 29.8361     | -28.5020   | 664265.7895 | -5.4789   |
| -5.4756                 |             |            |             |           |
| [65617]ENERGY: 16100000 | 3581.0121   | 6015.9552  | 5966.6049   |           |
| 390.3584                | -15447.2650 | -1855.5578 | 0.0000      | 0.0000    |
| 8809.4876               | 7460.5955   | 328.6360   | -1348.8921  | 7531.3896 |
| 333.1366                | 98.1527     | -2.0147    | 664265.7895 | -4.2286   |
| -4.2061                 |             |            |             |           |
| [65667]ENERGY: 16110000 | 3598.3501   | 5908.3770  | 5989.4995   |           |
| 356.1767                | -15561.0986 | -1763.3399 | 0.0000      | 0.0000    |
| 8929.4726               | 7457.4374   | 333.1121   | -1472.0352  | 7529.5078 |
| 333.1409                | 158.0232    | 35.6399    | 664265.7895 | -4.5545   |
| -4.5790                 |             |            |             |           |
| [65703]ENERGY: 16120000 | 3602.2083   | 5809.8453  | 5978.6904   |           |
| 378.2495                | -15378.6020 | -1876.8923 | 0.0000      | 0.0000    |
| 8947.9872               | 7461.4863   | 333.8027   | -1486.5009  | 7531.9981 |
| 333.2987                | 85.0288     | 83.1857    | 664265.7895 | -6.1816   |
| -6.1939                 |             |            |             |           |
| [65753]ENERGY: 16130000 | 3598.1272   | 5932.2686  | 5912.7492   |           |
| 366.9023                | -15513.3933 | -1771.6674 | 0.0000      | 0.0000    |
| 8934.7813               | 7459.7678   | 333.3101   | -1475.0135  | 7529.3894 |
| 333.1112                | 94.7021     | 133.4621   | 664265.7895 | -3.2053   |
| -3.1704                 |             |            |             |           |
| [65789]ENERGY: 16140000 | 3592.3162   | 5779.7606  | 5905.3423   |           |
| 359.3501                | -15455.0059 | -1807.7831 | 0.0000      | 0.0000    |
| 9080.5969               | 7454.5771   | 338.7497   | -1626.0198  | 7529.7375 |
| 333.0826                | 101.9279    | 29.6803    | 664265.7895 | -6.0178   |
| -6.0366                 |             |            |             |           |
| [65839]ENERGY: 16150000 | 3635.6891   | 5986.8354  | 5930.9958   |           |
| 343.0270                | -15459.3598 | -1836.5872 | 0.0000      | 0.0000    |
| 8856.6581               | 7457.2584   | 330.3957   | -1399.3997  | 7530.4997 |
| 333.2550                | 55.8934     | 16.7839    | 664265.7895 | -0.2455   |

Supplementary Text 6

-0.2478  
 [65875]ENERGY: 16160000 3769.2734 5915.8565 5985.2834  
 335.8512 -15575.7888 -1897.9328 0.0000 0.0000  
 8927.9803 7460.5232 333.0564 -1467.4570 7530.1192  
 333.3030 69.0754 64.8242 664265.7895 -6.2536  
 -6.2327  
 [65925]ENERGY: 16170000 3642.7029 5838.7217 5979.2362  
 359.4478 -15496.1208 -1861.9223 0.0000 0.0000  
 8995.9347 7458.0002 335.5914 -1537.9345 7532.2441  
 333.2101 39.7416 -13.1049 664265.7895 -5.0984  
 -5.1090  
 [65961]ENERGY: 16180000 3595.0549 5905.4356 5996.1367  
 391.9606 -15427.6450 -1902.0819 0.0000 0.0000  
 8900.5540 7459.4148 332.0332 -1441.1392 7532.5655  
 333.2541 59.6404 41.9138 664265.7895 -4.8501  
 -4.8375  
 [66011]ENERGY: 16190000 3673.5203 6069.6118 5864.6677  
 350.9770 -15432.4556 -1941.8374 0.0000 0.0000  
 8875.4104 7459.8941 331.0953 -1415.5163 7532.5498  
 333.4044 -11.1134 -63.9561 664265.7895 -0.5825  
 -0.5940  
 [66050]ENERGY: 16200000 3604.3920 5971.8122 5989.7504  
 381.2310 -15544.6770 -1879.5210 0.0000 0.0000  
 8934.5503 7457.5379 333.3015 -1477.0124 7532.6813  
 333.4519 183.2666 58.4321 664265.7895 -3.8540  
 -3.8551  
 [66100]ENERGY: 16210000 3678.1357 5936.2321 5907.0441  
 349.4476 -15503.0737 -1885.3521 0.0000 0.0000  
 8974.4313 7456.8649 334.7892 -1517.5663 7532.1123  
 333.2811 14.7757 -41.1917 664265.7895 -6.1379  
 -6.1441  
 [66136]ENERGY: 16220000 3603.0022 5869.0886 5954.2041  
 354.7816 -15404.5611 -1887.9797 0.0000 0.0000  
 8971.8391 7460.3747 334.6925 -1511.4644 7532.5831  
 333.3729 29.7593 -23.3190 664265.7895 -4.2130  
 -4.2007  
 [66186]ENERGY: 16230000 3699.0766 5833.3110 5918.0120  
 361.2440 -15492.0354 -1847.9765 0.0000 0.0000  
 8988.0610 7459.6928 335.2977 -1528.3682 7531.7532  
 333.2111 18.1705 -53.7942 664265.7895 -6.1940  
 -6.2123  
 [66222]ENERGY: 16240000 3612.2870 5890.4560 5984.2062  
 354.0931 -15361.1275 -1946.0289 0.0000 0.0000  
 8927.9869 7461.8727 333.0566 -1466.1142 7533.1617  
 333.2328 -29.6361 -114.8464 664265.7895 -5.2686  
 -5.2687  
 [66272]ENERGY: 16250000 3670.3526 5904.3254 5890.1472  
 393.1665 -15457.9409 -1804.5728 0.0000 0.0000  
 8865.3872 7460.8652 330.7214 -1404.5220 7532.1898  
 333.3992 -15.0838 37.8346 664265.7895 -4.2407  
 -4.2433  
 [66308]ENERGY: 16260000 3561.3563 6022.2154 5923.5961  
 352.2250 -15531.3262 -1866.5604 0.0000 0.0000  
 8993.7487 7455.2548 335.5099 -1538.4939 7531.5652



## Supplementary Text 6

|                         |             |            |             |           |
|-------------------------|-------------|------------|-------------|-----------|
| 333.3559                | 94.5035     | 114.7448   | 664265.7895 | -4.5940   |
| -4.5853                 |             |            |             |           |
| [66358]ENERGY: 16270000 | 3622.4098   | 5865.0904  | 5958.8003   |           |
| 370.3297                | -15338.3164 | -1898.7588 | 0.0000      | 0.0000    |
| 8882.7948               | 7462.3498   | 331.3707   | -1420.4450  | 7532.1334 |
| 333.4155                | -214.7098   | -126.6623  | 664265.7895 | -3.0963   |
| -3.1060                 |             |            |             |           |
| [66394]ENERGY: 16280000 | 3619.6951   | 5853.0479  | 5955.1325   |           |
| 341.9997                | -15475.4310 | -1832.5085 | 0.0000      | 0.0000    |
| 9000.6912               | 7462.6270   | 335.7688   | -1538.0641  | 7533.6182 |
| 333.2268                | 84.8425     | 70.9943    | 664265.7895 | -4.7927   |
| -4.7978                 |             |            |             |           |
| [66444]ENERGY: 16290000 | 3574.2543   | 5872.9336  | 5923.3717   |           |
| 393.7111                | -15325.7454 | -1835.5270 | 0.0000      | 0.0000    |
| 8865.8184               | 7468.8166   | 330.7374   | -1397.0018  | 7535.4674 |
| 333.0836                | 38.5119     | -21.3021   | 664265.7895 | -5.9552   |
| -5.9577                 |             |            |             |           |
| [66483]ENERGY: 16300000 | 3586.6809   | 5977.9092  | 5856.9921   |           |
| 353.1033                | -15498.2832 | -1818.8824 | 0.0000      | 0.0000    |
| 9004.1677               | 7461.6876   | 335.8985   | -1542.4800  | 7534.5946 |
| 333.2535                | 135.6252    | 60.8235    | 664265.7895 | -6.6232   |
| -6.5912                 |             |            |             |           |
| [66533]ENERGY: 16310000 | 3612.5148   | 5856.1974  | 5955.1946   |           |
| 350.3698                | -15438.5661 | -1814.8397 | 0.0000      | 0.0000    |
| 8938.7901               | 7459.6608   | 333.4596   | -1479.1293  | 7533.3799 |
| 333.4351                | -143.0119   | -51.4924   | 664265.7895 | -9.3065   |
| -9.3329                 |             |            |             |           |
| [66569]ENERGY: 16320000 | 3654.2712   | 5886.2152  | 5965.5393   |           |
| 361.1431                | -15399.3313 | -1888.8208 | 0.0000      | 0.0000    |
| 8883.5707               | 7462.5875   | 331.3997   | -1420.9832  | 7534.8199 |
| 333.5195                | -51.1579    | -81.2097   | 664265.7895 | -5.1643   |
| -5.1591                 |             |            |             |           |
| [66619]ENERGY: 16330000 | 3607.3502   | 5976.4921  | 5910.8190   |           |
| 367.1634                | -15446.7192 | -1852.5802 | 0.0000      | 0.0000    |
| 8899.9453               | 7462.4707   | 332.0105   | -1437.4746  | 7534.7110 |
| 333.3892                | 9.6124      | -58.1579   | 664265.7895 | -4.3864   |
| -4.3978                 |             |            |             |           |
| [66655]ENERGY: 16340000 | 3649.3691   | 5851.7207  | 6001.9016   |           |
| 373.3857                | -15456.2705 | -1846.2392 | 0.0000      | 0.0000    |
| 8889.3834               | 7463.2507   | 331.6165   | -1426.1327  | 7536.5638 |
| 333.4348                | 105.2917    | 16.7633    | 664265.7895 | -6.9686   |
| -6.9640                 |             |            |             |           |
| [66705]ENERGY: 16350000 | 3691.5363   | 5835.3878  | 5901.4643   |           |
| 353.2577                | -15426.0934 | -1863.3557 | 0.0000      | 0.0000    |
| 8970.0350               | 7462.2320   | 334.6252   | -1507.8030  | 7536.8053 |
| 333.4498                | 69.1104     | -12.0277   | 664265.7895 | -5.9717   |
| -5.9699                 |             |            |             |           |
| [66741]ENERGY: 16360000 | 3708.9241   | 5852.5757  | 5934.5935   |           |
| 377.9096                | -15478.4621 | -1840.2673 | 0.0000      | 0.0000    |
| 8908.7049               | 7463.9784   | 332.3373   | -1444.7265  | 7536.1195 |
| 333.5784                | 4.3031      | 25.1394    | 664265.7895 | -6.8049   |
| -6.7881                 |             |            |             |           |
| [66791]ENERGY: 16370000 | 3682.8926   | 5809.3179  | 5917.9717   |           |
| 340.9148                | -15410.8709 | -1851.0554 | 0.0000      | 0.0000    |

Supplementary Text 6

|                         |             |            |             |           |
|-------------------------|-------------|------------|-------------|-----------|
| 8972.9731               | 7462.1438   | 334.7348   | -1510.8292  | 7535.5420 |
| 333.5015                | 0.6115      | 13.5455    | 664265.7895 | -3.5437   |
| -3.5446                 |             |            |             |           |
| [66827]ENERGY: 16380000 | 3756.9611   | 5956.1674  | 5924.5277   |           |
| 368.2394                | -15558.8988 | -1844.6433 | 0.0000      | 0.0000    |
| 8863.4777               | 7465.8312   | 330.6501   | -1397.6465  | 7536.1568 |
| 333.4728                | 139.9471    | 57.3485    | 664265.7895 | -6.1592   |
| -6.1760                 |             |            |             |           |
| [66877]ENERGY: 16390000 | 3609.3041   | 5934.4550  | 5905.4731   |           |
| 349.4013                | -15431.7492 | -1823.8756 | 0.0000      | 0.0000    |
| 8917.7787               | 7460.7873   | 332.6758   | -1456.9914  | 7537.0087 |
| 333.4916                | 109.0483    | 44.7354    | 664265.7895 | -7.9736   |
| -7.9728                 |             |            |             |           |
| [66916]ENERGY: 16400000 | 3713.8288   | 5864.8263  | 6003.6974   |           |
| 369.9519                | -15534.2231 | -1867.9533 | 0.0000      | 0.0000    |
| 8913.6991               | 7463.8269   | 332.5236   | -1449.8721  | 7536.3075 |
| 333.4640                | -71.9040    | -123.3734  | 664265.7895 | -8.0576   |
| -8.0514                 |             |            |             |           |
| [66966]ENERGY: 16410000 | 3718.1486   | 5965.5615  | 5950.2104   |           |
| 369.4699                | -15529.7271 | -1881.8890 | 0.0000      | 0.0000    |
| 8870.7797               | 7462.5540   | 330.9225   | -1408.2257  | 7535.7142 |
| 333.1813                | -11.7613    | -9.3449    | 664265.7895 | -6.5544   |
| -6.5491                 |             |            |             |           |
| [67002]ENERGY: 16420000 | 3689.9230   | 5839.3650  | 5963.2084   |           |
| 370.7697                | -15414.3932 | -1856.1721 | 0.0000      | 0.0000    |
| 8871.8136               | 7464.5145   | 330.9611   | -1407.2992  | 7536.5453 |
| 333.5413                | -31.7863    | -48.5313   | 664265.7895 | -6.0539   |
| -6.0577                 |             |            |             |           |
| [67052]ENERGY: 16430000 | 3670.7023   | 5919.1651  | 5893.9222   |           |
| 367.0682                | -15515.5315 | -1790.1586 | 0.0000      | 0.0000    |
| 8921.9070               | 7467.0747   | 332.8298   | -1454.8323  | 7539.2042 |
| 333.5171                | 43.4257     | 12.0269    | 664265.7895 | -6.2264   |
| -6.2091                 |             |            |             |           |
| [67088]ENERGY: 16440000 | 3641.9972   | 5915.7678  | 5964.2212   |           |
| 386.8100                | -15492.3845 | -1848.5899 | 0.0000      | 0.0000    |
| 8900.2057               | 7468.0274   | 332.0203   | -1432.1783  | 7539.2891 |
| 333.5535                | 25.4332     | -59.7066   | 664265.7895 | -1.7412   |
| -1.7666                 |             |            |             |           |
| [67138]ENERGY: 16450000 | 3631.2378   | 5972.3052  | 5929.9763   |           |
| 373.5360                | -15484.3313 | -1888.2017 | 0.0000      | 0.0000    |
| 8932.0195               | 7466.5418   | 333.2071   | -1465.4777  | 7539.2331 |
| 333.5103                | 54.2993     | -20.1863   | 664265.7895 | -3.7042   |
| -3.6981                 |             |            |             |           |
| [67174]ENERGY: 16460000 | 3598.3792   | 5869.9882  | 5927.2464   |           |
| 391.9621                | -15515.5782 | -1837.8915 | 0.0000      | 0.0000    |
| 9030.6469               | 7464.7530   | 336.8863   | -1565.8939  | 7538.7333 |
| 333.7045                | -5.4847     | 0.2177     | 664265.7895 | -8.4932   |
| -8.5012                 |             |            |             |           |
| [67224]ENERGY: 16470000 | 3652.8512   | 5847.3629  | 5879.4949   |           |
| 346.1498                | -15425.0508 | -1823.0192 | 0.0000      | 0.0000    |
| 8989.6188               | 7467.4075   | 335.3558   | -1522.2112  | 7538.1851 |
| 333.5177                | 22.4488     | 105.1990   | 664265.7895 | -12.7060  |
| -12.6891                |             |            |             |           |
| [67260]ENERGY: 16480000 | 3655.3045   | 5897.6997  | 5933.4972   |           |

## Supplementary Text 6

|                         |             |            |             |           |
|-------------------------|-------------|------------|-------------|-----------|
| 340.7995                | -15506.1420 | -1795.3261 | 0.0000      | 0.0000    |
| 8939.9774               | 7465.8102   | 333.5039   | -1474.1672  | 7540.5108 |
| 333.5375                | 70.0070     | 61.8133    | 664265.7895 | -7.9602   |
| -7.9651                 |             |            |             |           |
| [67310]ENERGY: 16490000 | 3589.6442   | 5907.5845  | 6012.9098   |           |
| 377.6066                | -15461.4464 | -1885.5527 | 0.0000      | 0.0000    |
| 8926.9620               | 7467.7079   | 333.0184   | -1459.2541  | 7539.7771 |
| 333.5528                | -93.2964    | -38.4659   | 664265.7895 | -10.4062  |
| -10.3970                |             |            |             |           |
| [67349]ENERGY: 16500000 | 3576.1332   | 5866.4304  | 5921.2981   |           |
| 385.9984                | -15458.1329 | -1833.0110 | 0.0000      | 0.0000    |
| 9006.1936               | 7464.9098   | 335.9741   | -1541.2838  | 7540.9896 |
| 333.5620                | 0.6460      | -9.4422    | 664265.7895 | -9.7593   |
| -9.7577                 |             |            |             |           |
| [67399]ENERGY: 16510000 | 3573.3526   | 5913.0366  | 5931.1293   |           |
| 353.9587                | -15434.7035 | -1840.9357 | 0.0000      | 0.0000    |
| 8971.4052               | 7467.2431   | 334.6763   | -1504.1620  | 7539.5422 |
| 333.3950                | -19.3110    | 27.9786    | 664265.7895 | -10.9796  |
| -10.9815                |             |            |             |           |
| [67435]ENERGY: 16520000 | 3616.6672   | 5885.9905  | 5944.5172   |           |
| 399.8282                | -15354.9908 | -1868.7699 | 0.0000      | 0.0000    |
| 8851.8040               | 7475.0464   | 330.2146   | -1376.7576  | 7542.3466 |
| 333.2887                | 42.3033     | -53.2854   | 664265.7895 | -8.3109   |
| -8.3311                 |             |            |             |           |
| [67485]ENERGY: 16530000 | 3571.7333   | 5890.5407  | 5940.9743   |           |
| 381.8016                | -15383.8694 | -1800.6333 | 0.0000      | 0.0000    |
| 8870.7623               | 7471.3096   | 330.9219   | -1399.4527  | 7541.2883 |
| 333.2160                | -123.9942   | -98.2630   | 664265.7895 | -8.6427   |
| -8.6260                 |             |            |             |           |
| [67521]ENERGY: 16540000 | 3602.9861   | 5961.6090  | 5933.8673   |           |
| 346.2274                | -15394.9636 | -1868.7103 | 0.0000      | 0.0000    |
| 8889.6117               | 7470.6275   | 331.6251   | -1418.9842  | 7543.0003 |
| 333.0617                | -2.2968     | -24.9602   | 664265.7895 | -11.4455  |
| -11.4534                |             |            |             |           |
| [67571]ENERGY: 16550000 | 3753.7455   | 5875.5492  | 6019.7006   |           |
| 386.3583                | -15547.0401 | -1882.4603 | 0.0000      | 0.0000    |
| 8861.9937               | 7467.8469   | 330.5948   | -1394.1468  | 7541.7780 |
| 333.2495                | -304.2706   | -231.4032  | 664265.7895 | -11.3551  |
| -11.3522                |             |            |             |           |
| [67607]ENERGY: 16560000 | 3576.5861   | 5864.5348  | 5970.1108   |           |
| 402.8923                | -15385.4936 | -1861.3927 | 0.0000      | 0.0000    |
| 8902.8465               | 7470.0842   | 332.1188   | -1432.7622  | 7543.3462 |
| 333.2535                | 53.2003     | 35.4829    | 664265.7895 | -11.1410  |
| -11.1420                |             |            |             |           |
| [67657]ENERGY: 16570000 | 3698.3990   | 5896.9970  | 6019.8317   |           |
| 350.7699                | -15528.3297 | -1820.0645 | 0.0000      | 0.0000    |
| 8854.4163               | 7472.0197   | 330.3121   | -1382.3966  | 7542.6795 |
| 333.2922                | 128.5167    | 68.5910    | 664265.7895 | -7.2243   |
| -7.2292                 |             |            |             |           |
| [67693]ENERGY: 16580000 | 3625.3753   | 5935.5643  | 5909.8329   |           |
| 358.0818                | -15389.3890 | -1853.2687 | 0.0000      | 0.0000    |
| 8883.3231               | 7469.5198   | 331.3905   | -1413.8033  | 7541.8676 |
| 333.0262                | 9.0863      | -35.9459   | 664265.7895 | 0.1141    |
| 0.1255                  |             |            |             |           |

## Supplementary Text 6

|                         |             |            |             |           |
|-------------------------|-------------|------------|-------------|-----------|
| [67743]ENERGY: 16590000 | 3651.8425   | 6001.6176  | 5933.3942   |           |
| 356.9272                | -15463.1190 | -1803.5610 | 0.0000      | 0.0000    |
| 8797.9375               | 7475.0389   | 328.2052   | -1322.8986  | 7544.7786 |
| 333.0804                | 95.7993     | 140.1743   | 664265.7895 | -0.8438   |
| -0.8557                 |             |            |             |           |
| [67782]ENERGY: 16600000 | 3647.2316   | 5966.6175  | 5907.2113   |           |
| 381.2310                | -15493.7755 | -1848.2769 | 0.0000      | 0.0000    |
| 8908.0898               | 7468.3288   | 332.3144   | -1439.7610  | 7543.8446 |
| 333.4238                | 72.3909     | 85.1804    | 664265.7895 | -4.4741   |
| -4.4597                 |             |            |             |           |
| [67832]ENERGY: 16610000 | 3628.4747   | 6007.6789  | 5941.2161   |           |
| 386.0975                | -15490.2707 | -1829.2655 | 0.0000      | 0.0000    |
| 8830.9035               | 7474.8344   | 329.4350   | -1356.0691  | 7544.2319 |
| 333.7835                | -91.2198    | -34.3343   | 664265.7895 | -8.0019   |
| -8.0027                 |             |            |             |           |
| [67868]ENERGY: 16620000 | 3690.6431   | 5773.6579  | 5896.0314   |           |
| 359.6726                | -15389.7422 | -1877.6532 | 0.0000      | 0.0000    |
| 9024.7517               | 7477.3614   | 336.6664   | -1547.3903  | 7545.6046 |
| 333.6255                | -185.2227   | -215.0699  | 664265.7895 | -7.5080   |
| -7.5055                 |             |            |             |           |
| [67918]ENERGY: 16630000 | 3638.7144   | 5873.2146  | 5925.3866   |           |
| 325.1644                | -15367.8148 | -1877.6713 | 0.0000      | 0.0000    |
| 8958.8291               | 7475.8230   | 334.2072   | -1483.0061  | 7548.0243 |
| 333.6982                | -13.5008    | -158.3248  | 664265.7895 | -10.1954  |
| -10.1990                |             |            |             |           |
| [67954]ENERGY: 16640000 | 3660.7474   | 5966.0544  | 5922.9312   |           |
| 361.7555                | -15489.0507 | -1889.2220 | 0.0000      | 0.0000    |
| 8943.0658               | 7476.2815   | 333.6191   | -1466.7843  | 7546.4478 |
| 333.3859                | -57.3225    | -14.3089   | 664265.7895 | -7.9809   |
| -7.9807                 |             |            |             |           |
| [68004]ENERGY: 16650000 | 3657.6481   | 5860.5176  | 5931.0474   |           |
| 391.7427                | -15402.7758 | -1879.0882 | 0.0000      | 0.0000    |
| 8917.9715               | 7477.0634   | 332.6830   | -1440.9081  | 7548.1064 |
| 333.4182                | -13.4097    | -44.8501   | 664265.7895 | -12.5295  |
| -12.5486                |             |            |             |           |
| [68040]ENERGY: 16660000 | 3616.9639   | 5849.9463  | 5927.5028   |           |
| 375.3101                | -15367.9447 | -1909.5857 | 0.0000      | 0.0000    |
| 8984.8841               | 7477.0768   | 335.1792   | -1507.8072  | 7549.0706 |
| 333.6781                | 279.8286    | 122.0910   | 664265.7895 | -6.3840   |
| -6.3785                 |             |            |             |           |
| [68090]ENERGY: 16670000 | 3608.6183   | 5972.2847  | 5961.3150   |           |
| 366.4037                | -15467.2039 | -1882.6424 | 0.0000      | 0.0000    |
| 8916.4336               | 7475.2089   | 332.6256   | -1441.2246  | 7547.8081 |
| 333.6230                | 57.6738     | 68.7272    | 664265.7895 | -10.1779  |
| -10.1646                |             |            |             |           |
| [68126]ENERGY: 16680000 | 3587.7034   | 5973.0006  | 5947.6205   |           |
| 364.3294                | -15475.8910 | -1887.6419 | 0.0000      | 0.0000    |
| 8963.2650               | 7472.3861   | 334.3727   | -1490.8789  | 7547.1380 |
| 333.5816                | 96.3292     | 32.5973    | 664265.7895 | -5.1517   |
| -5.1625                 |             |            |             |           |
| [68176]ENERGY: 16690000 | 3693.3180   | 5928.0188  | 5940.7011   |           |
| 360.2953                | -15449.1499 | -1866.5595 | 0.0000      | 0.0000    |
| 8872.2157               | 7478.8396   | 330.9761   | -1393.3761  | 7548.3411 |
| 333.6818                | -1.3476     | 15.7132    | 664265.7895 | -7.1457   |

## Supplementary Text 6

-7.1409

|                         |             |            |             |
|-------------------------|-------------|------------|-------------|
| [68215]ENERGY: 16700000 | 3659.8438   | 5899.5319  | 5932.8871   |
| 377.8381                | -15481.9247 | -1811.7116 | 0.0000      |
| 8897.6597               | 7474.1245   | 331.9253   | -1423.5353  |
| 333.6492                | 55.4637     | 6.5893     | 664265.7895 |

-7.5108

|                         |             |            |             |
|-------------------------|-------------|------------|-------------|
| [68265]ENERGY: 16710000 | 3712.7510   | 5961.0605  | 5958.3894   |
| 358.5986                | -15490.6408 | -1863.6311 | 0.0000      |
| 8846.1157               | 7482.6433   | 330.0024   | -1363.4724  |
| 333.6186                | 64.5310     | -1.6879    | 664265.7895 |

-6.3008

|                         |             |            |             |
|-------------------------|-------------|------------|-------------|
| [68301]ENERGY: 16720000 | 3727.4973   | 5972.3591  | 5919.1499   |
| 358.5837                | -15489.0659 | -1859.2885 | 0.0000      |
| 8848.7188               | 7477.9545   | 330.0995   | -1370.7643  |
| 333.5243                | -139.2609   | -123.8196  | 664265.7895 |

-5.7864

|                         |             |            |             |
|-------------------------|-------------|------------|-------------|
| [68351]ENERGY: 16730000 | 3623.6607   | 5926.7993  | 5919.0630   |
| 356.8188                | -15417.8386 | -1938.1604 | 0.0000      |
| 9002.3160               | 7472.6587   | 335.8295   | -1529.6573  |
| 333.4830                | 70.3964     | 31.0464    | 664265.7895 |

-5.5513

|                         |             |            |             |
|-------------------------|-------------|------------|-------------|
| [68387]ENERGY: 16740000 | 3647.4226   | 5881.1818  | 5936.3059   |
| 374.6390                | -15448.6480 | -1883.4209 | 0.0000      |
| 8965.3825               | 7472.8629   | 334.4517   | -1492.5196  |
| 333.6699                | -113.6873   | -28.2116   | 664265.7895 |

-3.7186

|                         |             |            |             |
|-------------------------|-------------|------------|-------------|
| [68437]ENERGY: 16750000 | 3601.6215   | 5928.3432  | 5941.6964   |
| 389.9721                | -15359.0164 | -1940.7031 | 0.0000      |
| 8911.1079               | 7473.0215   | 332.4270   | -1438.0864  |
| 333.6021                | -65.4904    | -67.9310   | 664265.7895 |

-5.2831

|                         |             |            |             |
|-------------------------|-------------|------------|-------------|
| [68473]ENERGY: 16760000 | 3641.7935   | 5905.6792  | 5911.0899   |
| 370.1650                | -15386.1317 | -1921.3043 | 0.0000      |
| 8953.5798               | 7474.8715   | 334.0114   | -1478.7084  |
| 333.5415                | -161.9852   | -92.4309   | 664265.7895 |

-4.6138

|                         |             |            |             |
|-------------------------|-------------|------------|-------------|
| [68523]ENERGY: 16770000 | 3620.4586   | 5802.7150  | 5910.7690   |
| 374.6756                | -15439.7265 | -1852.0181 | 0.0000      |
| 9054.7838               | 7471.6573   | 337.7868   | -1583.1265  |
| 333.4744                | 92.1545     | 28.8219    | 664265.7895 |

-2.8021

|                         |             |            |             |
|-------------------------|-------------|------------|-------------|
| [68559]ENERGY: 16780000 | 3626.9070   | 5974.8459  | 5971.0955   |
| 360.9104                | -15483.4956 | -1852.1126 | 0.0000      |
| 8879.9666               | 7478.1173   | 331.2652   | -1401.8494  |
| 333.2621                | 1.5912      | 112.0218   | 664265.7895 |

-6.2262

|                         |             |            |             |
|-------------------------|-------------|------------|-------------|
| [68609]ENERGY: 16790000 | 3649.1948   | 5841.6942  | 5934.0369   |
| 383.9159                | -15384.2878 | -1821.0834 | 0.0000      |
| 8877.8926               | 7481.3631   | 331.1879   | -1396.5295  |
| 333.5927                | -16.1764    | -36.2444   | 664265.7895 |

-3.7562

|                         |             |            |            |
|-------------------------|-------------|------------|------------|
| [68648]ENERGY: 16800000 | 3690.2232   | 5946.0171  | 5958.7651  |
| 383.5744                | -15357.7685 | -1928.1793 | 0.0000     |
| 8787.4963               | 7480.1282   | 327.8157   | -1307.3681 |

## Supplementary Text 6

|                         |             |            |             |           |
|-------------------------|-------------|------------|-------------|-----------|
| 333.6687                | 87.4020     | 46.1026    | 664265.7895 | -2.3922   |
| -2.3992                 |             |            |             |           |
| [68698]ENERGY: 16810000 | 3662.9683   | 5948.5297  | 5948.9757   |           |
| 380.8265                | -15399.2197 | -1927.2299 | 0.0000      | 0.0000    |
| 8861.9993               | 7476.8500   | 330.5950   | -1385.1493  | 7547.6815 |
| 333.5587                | -145.3205   | -128.5026  | 664265.7895 | -4.8282   |
| -4.8249                 |             |            |             |           |
| [68734]ENERGY: 16820000 | 3655.3790   | 5910.2008  | 5911.5024   |           |
| 377.6337                | -15441.8465 | -1882.2457 | 0.0000      | 0.0000    |
| 8939.9244               | 7470.5481   | 333.5020   | -1469.3763  | 7547.7106 |
| 333.6421                | -4.7417     | -79.8146   | 664265.7895 | -5.1440   |
| -5.1549                 |             |            |             |           |
| [68784]ENERGY: 16830000 | 3686.3496   | 6006.7573  | 5912.9279   |           |
| 340.8303                | -15488.7523 | -1837.3945 | 0.0000      | 0.0000    |
| 8859.6119               | 7480.3303   | 330.5059   | -1379.2816  | 7548.7677 |
| 333.6181                | 97.2122     | 131.8134   | 664265.7895 | -4.2782   |
| -4.2726                 |             |            |             |           |
| [68820]ENERGY: 16840000 | 3591.0296   | 5893.3815  | 5967.1559   |           |
| 368.4675                | -15475.0118 | -1799.4204 | 0.0000      | 0.0000    |
| 8930.9789               | 7476.5812   | 333.1682   | -1454.3977  | 7548.8688 |
| 333.8048                | 159.0979    | 83.6659    | 664265.7895 | -1.9401   |
| -1.9540                 |             |            |             |           |
| [68870]ENERGY: 16850000 | 3673.1817   | 5919.4183  | 5951.3682   |           |
| 361.3788                | -15523.3770 | -1869.7043 | 0.0000      | 0.0000    |
| 8965.7579               | 7478.0235   | 334.4657   | -1487.7343  | 7548.7049 |
| 333.9467                | 86.2338     | 9.2976     | 664265.7895 | -3.3987   |
| -3.3993                 |             |            |             |           |
| [68906]ENERGY: 16860000 | 3629.2077   | 5888.8316  | 5882.2964   |           |
| 342.2344                | -15441.8464 | -1881.7775 | 0.0000      | 0.0000    |
| 9056.5326               | 7475.4787   | 337.8520   | -1581.0538  | 7548.1139 |
| 333.9171                | 8.9462      | -73.7329   | 664265.7895 | -3.1919   |
| -3.1752                 |             |            |             |           |
| [68956]ENERGY: 16870000 | 3672.9107   | 5840.4927  | 5997.0250   |           |
| 372.7999                | -15447.2370 | -1906.7111 | 0.0000      | 0.0000    |
| 8945.2765               | 7474.5568   | 333.7016   | -1470.7197  | 7549.0892 |
| 334.0947                | -14.2134    | 78.8549    | 664265.7895 | -4.2277   |
| -4.2173                 |             |            |             |           |
| [68992]ENERGY: 16880000 | 3641.4603   | 5902.0207  | 5942.4742   |           |
| 368.7035                | -15491.6253 | -1916.9296 | 0.0000      | 0.0000    |
| 9027.9505               | 7474.0543   | 336.7857   | -1553.8962  | 7549.5865 |
| 333.9633                | -88.2932    | -33.3030   | 664265.7895 | -5.9182   |
| -5.9076                 |             |            |             |           |
| [69042]ENERGY: 16890000 | 3693.0076   | 5871.4108  | 5911.6816   |           |
| 373.0035                | -15469.6769 | -1762.7603 | 0.0000      | 0.0000    |
| 8858.8421               | 7475.5084   | 330.4772   | -1383.3337  | 7547.6615 |
| 333.8365                | -43.8160    | 3.4682     | 664265.7895 | -5.5565   |
| -5.5792                 |             |            |             |           |
| [69081]ENERGY: 16900000 | 3591.4090   | 5902.6739  | 5910.1456   |           |
| 374.8294                | -15385.1808 | -1896.4912 | 0.0000      | 0.0000    |
| 8980.5333               | 7477.9192   | 335.0169   | -1502.6141  | 7548.9061 |
| 333.8470                | 41.6768     | -20.4316   | 664265.7895 | -6.3213   |
| -6.3206                 |             |            |             |           |
| [69131]ENERGY: 16910000 | 3563.3633   | 5891.1478  | 5963.3690   |           |
| 371.4640                | -15476.7020 | -1888.4278 | 0.0000      | 0.0000    |

## Supplementary Text 6

|                         |             |            |             |           |
|-------------------------|-------------|------------|-------------|-----------|
| 9048.1394               | 7472.3538   | 337.5389   | -1575.7856  | 7548.3385 |
| 334.0861                | 91.0756     | -30.7714   | 664265.7895 | -4.3803   |
| -4.3809                 |             |            |             |           |
| [69167]ENERGY: 16920000 | 3697.0885   | 5833.7449  | 5945.6014   |           |
| 364.3154                | -15425.5614 | -1846.6717 | 0.0000      | 0.0000    |
| 8908.1015               | 7476.6186   | 332.3148   | -1431.4829  | 7549.1305 |
| 333.8193                | -94.9829    | -7.2641    | 664265.7895 | 0.0483    |
| 0.0539                  |             |            |             |           |
| [69217]ENERGY: 16930000 | 3608.5512   | 6019.0651  | 5947.1797   |           |
| 379.4126                | -15412.2733 | -1948.9104 | 0.0000      | 0.0000    |
| 8882.0783               | 7475.1032   | 331.3440   | -1406.9751  | 7548.1455 |
| 333.9626                | -81.2675    | -90.3327   | 664265.7895 | -4.5191   |
| -4.5322                 |             |            |             |           |
| [69253]ENERGY: 16940000 | 3698.2817   | 5934.5219  | 5964.2666   |           |
| 349.5084                | -15445.0759 | -1890.1067 | 0.0000      | 0.0000    |
| 8867.7298               | 7479.1258   | 330.8088   | -1388.6041  | 7550.1520 |
| 333.9865                | -16.5886    | 14.9235    | 664265.7895 | -4.5816   |
| -4.5863                 |             |            |             |           |
| [69303]ENERGY: 16950000 | 3587.4264   | 5988.9644  | 5900.5632   |           |
| 373.3937                | -15527.3540 | -1850.5915 | 0.0000      | 0.0000    |
| 9003.8121               | 7476.2143   | 335.8853   | -1527.5978  | 7548.8311 |
| 334.0112                | 75.4819     | 37.3714    | 664265.7895 | -5.0202   |
| -5.0288                 |             |            |             |           |
| [69339]ENERGY: 16960000 | 3644.7283   | 5926.7943  | 5970.5791   |           |
| 356.1778                | -15439.4554 | -1881.2359 | 0.0000      | 0.0000    |
| 8900.6263               | 7478.2144   | 332.0359   | -1422.4119  | 7549.3057 |
| 334.0309                | 14.3481     | -43.8601   | 664265.7895 | -1.9786   |
| -1.9447                 |             |            |             |           |
| [69389]ENERGY: 16970000 | 3712.1571   | 5891.7631  | 5905.4299   |           |
| 357.8284                | -15482.4425 | -1873.3734 | 0.0000      | 0.0000    |
| 8966.7466               | 7478.1092   | 334.5025   | -1488.6374  | 7549.0428 |
| 334.0583                | -13.1521    | 7.8015     | 664265.7895 | -1.2954   |
| -1.2986                 |             |            |             |           |
| [69425]ENERGY: 16980000 | 3671.9365   | 5999.8048  | 5928.3600   |           |
| 351.8315                | -15471.9522 | -1942.5378 | 0.0000      | 0.0000    |
| 8943.4168               | 7480.8597   | 333.6322   | -1462.5571  | 7550.9744 |
| 333.8117                | 4.7101      | -113.5832  | 664265.7895 | 0.7654    |
| 0.7484                  |             |            |             |           |
| [69475]ENERGY: 16990000 | 3600.7307   | 5975.2307  | 5891.3903   |           |
| 380.7341                | -15447.1864 | -1906.9326 | 0.0000      | 0.0000    |
| 8979.5736               | 7473.5404   | 334.9811   | -1506.0331  | 7548.8338 |
| 333.9635                | -43.0370    | 5.4616     | 664265.7895 | -0.6199   |
| -0.6052                 |             |            |             |           |
| [69514]ENERGY: 17000000 | 3652.4300   | 5825.1813  | 5853.8471   |           |
| 359.2299                | -15403.8562 | -1789.4942 | 0.0000      | 0.0000    |
| 8983.6853               | 7481.0233   | 335.1344   | -1502.6620  | 7549.3610 |
| 333.8659                | 117.8492    | 77.3944    | 664265.7895 | -2.7066   |
| -2.7188                 |             |            |             |           |
| [69564]ENERGY: 17010000 | 3661.3814   | 5926.6553  | 5958.5581   |           |
| 350.7568                | -15502.0651 | -1860.7047 | 0.0000      | 0.0000    |
| 8944.7429               | 7479.3247   | 333.6817   | -1465.4182  | 7550.6623 |
| 333.9250                | -46.8439    | -108.9553  | 664265.7895 | 0.7196    |
| 0.7110                  |             |            |             |           |
| [69600]ENERGY: 17020000 | 3752.1385   | 5992.0528  | 5905.2182   |           |

## Supplementary Text 6

|                         |             |            |             |           |
|-------------------------|-------------|------------|-------------|-----------|
| 348.6903                | -15513.8543 | -1829.9453 | 0.0000      | 0.0000    |
| 8823.9048               | 7478.2049   | 329.1739   | -1345.6999  | 7549.9608 |
| 333.8792                | 100.0057    | 54.2490    | 664265.7895 | -0.4242   |
| -0.4176                 |             |            |             |           |
| [69650]ENERGY: 17030000 | 3621.9600   | 5883.0495  | 5908.3743   |           |
| 370.9145                | -15478.8326 | -1832.4178 | 0.0000      | 0.0000    |
| 9005.6526               | 7478.7005   | 335.9539   | -1526.9521  | 7552.1227 |
| 333.8675                | -7.2305     | -45.7529   | 664265.7895 | 3.8969    |
| 3.9007                  |             |            |             |           |
| [69686]ENERGY: 17040000 | 3728.8334   | 5898.4745  | 5924.9060   |           |
| 357.3733                | -15509.4067 | -1908.9186 | 0.0000      | 0.0000    |
| 8988.7108               | 7479.9727   | 335.3219   | -1508.7380  | 7550.8853 |
| 333.6754                | -175.6268   | -264.2464  | 664265.7895 | 0.9725    |
| 0.9709                  |             |            |             |           |
| [69736]ENERGY: 17050000 | 3685.4529   | 5975.7099  | 5892.6005   |           |
| 347.8622                | -15462.6312 | -1830.6275 | 0.0000      | 0.0000    |
| 8870.5969               | 7478.9636   | 330.9157   | -1391.6333  | 7551.6764 |
| 333.7608                | 27.6438     | 37.4210    | 664265.7895 | -0.1083   |
| -0.1172                 |             |            |             |           |
| [69772]ENERGY: 17060000 | 3653.2200   | 5945.6469  | 5916.5830   |           |
| 356.3754                | -15484.9656 | -1854.0588 | 0.0000      | 0.0000    |
| 8948.7311               | 7481.5319   | 333.8305   | -1467.1991  | 7552.3337 |
| 334.0327                | 9.4510      | 0.9659     | 664265.7895 | 2.1525    |
| 2.1793                  |             |            |             |           |
| [69822]ENERGY: 17070000 | 3691.9742   | 5908.5695  | 5897.1032   |           |
| 360.0580                | -15537.7668 | -1817.3691 | 0.0000      | 0.0000    |
| 8981.8217               | 7484.3907   | 335.0649   | -1497.4310  | 7553.0610 |
| 333.8425                | 91.9653     | 52.1309    | 664265.7895 | -1.6456   |
| -1.6732                 |             |            |             |           |
| [69858]ENERGY: 17080000 | 3606.5295   | 5956.3123  | 5894.6724   |           |
| 345.5006                | -15478.5529 | -1828.3409 | 0.0000      | 0.0000    |
| 8983.1257               | 7479.2466   | 335.1136   | -1503.8791  | 7551.9139 |
| 333.8246                | 270.1041    | 81.5215    | 664265.7895 | 2.2385    |
| 2.2423                  |             |            |             |           |
| [69908]ENERGY: 17090000 | 3719.4347   | 5959.9391  | 5881.8310   |           |
| 371.6423                | -15513.8654 | -1819.2017 | 0.0000      | 0.0000    |
| 8883.5937               | 7483.3738   | 331.4006   | -1400.2199  | 7553.3079 |
| 333.8599                | -1.3161     | 16.6715    | 664265.7895 | -1.0472   |
| -1.0341                 |             |            |             |           |
| [69947]ENERGY: 17100000 | 3663.0908   | 5942.6651  | 5863.6271   |           |
| 372.0457                | -15544.2345 | -1815.0339 | 0.0000      | 0.0000    |
| 8995.1688               | 7477.3290   | 335.5628   | -1517.8398  | 7550.7817 |
| 333.8310                | -65.8339    | -8.9257    | 664265.7895 | -2.0486   |
| -2.0679                 |             |            |             |           |
| [69997]ENERGY: 17110000 | 3681.0023   | 5978.4234  | 5873.8841   |           |
| 339.7018                | -15509.2586 | -1861.4622 | 0.0000      | 0.0000    |
| 8973.4894               | 7475.7801   | 334.7541   | -1497.7093  | 7551.4869 |
| 334.0960                | -34.9261    | -17.9617   | 664265.7895 | -4.0197   |
| -3.9847                 |             |            |             |           |
| [70033]ENERGY: 17120000 | 3701.2896   | 5961.0217  | 5936.4384   |           |
| 370.2085                | -15524.4129 | -1851.7447 | 0.0000      | 0.0000    |
| 8889.2074               | 7482.0081   | 331.6100   | -1407.1993  | 7551.8551 |
| 333.8940                | -35.9698    | -43.7787   | 664265.7895 | -1.9102   |
| -1.9450                 |             |            |             |           |



## Supplementary Text 6

|                         |             |            |             |
|-------------------------|-------------|------------|-------------|
| [70083]ENERGY: 17130000 | 3660.1489   | 5964.9109  | 5882.4471   |
| 371.2078                | -15436.5429 | -1916.4310 | 0.0000      |
| 8956.4692               | 7482.2100   | 334.1192   | -1474.2592  |
| 333.9220                | 30.2743     | -81.0908   | 664265.7895 |
| -5.6773                 |             |            | -5.7013     |
| [70119]ENERGY: 17140000 | 3631.2320   | 5831.9423  | 5905.1101   |
| 352.8845                | -15514.5437 | -1785.8686 | 0.0000      |
| 9060.5925               | 7481.3491   | 338.0035   | -1579.2434  |
| 333.8846                | 167.9099    | 128.2566   | 664265.7895 |
| -3.0294                 |             |            | -3.0169     |
| [70169]ENERGY: 17150000 | 3712.4614   | 5952.0456  | 5938.1771   |
| 386.4420                | -15469.3797 | -1944.7785 | 0.0000      |
| 8905.2309               | 7480.1988   | 332.2077   | -1425.0321  |
| 334.0003                | -229.5148   | -210.9640  | 664265.7895 |
| -7.1911                 |             |            | -7.1992     |
| [70205]ENERGY: 17160000 | 3622.9822   | 5966.3560  | 5919.4300   |
| 350.7709                | -15436.5552 | -1867.0783 | 0.0000      |
| 8924.7223               | 7480.6279   | 332.9348   | -1444.0944  |
| 333.7588                | -2.6509     | -97.9022   | 664265.7895 |
| -6.1077                 |             |            | -6.1003     |
| [70255]ENERGY: 17170000 | 3715.6077   | 5824.3818  | 5885.7490   |
| 370.0245                | -15537.9110 | -1801.7801 | 0.0000      |
| 9019.4965               | 7475.5682   | 336.4704   | -1543.9282  |
| 333.6181                | -65.3583    | -71.1593   | 664265.7895 |
| -5.9830                 |             |            | -5.9982     |
| [70291]ENERGY: 17180000 | 3582.6524   | 5829.4279  | 5971.7766   |
| 359.4798                | -15329.2979 | -1874.6888 | 0.0000      |
| 8943.1100               | 7482.4600   | 333.6208   | -1460.6500  |
| 333.7596                | 175.9729    | 37.6891    | 664265.7895 |
| -6.7283                 |             |            | -6.7236     |
| [70341]ENERGY: 17190000 | 3651.8094   | 5903.1964  | 5892.4222   |
| 356.2513                | -15481.9503 | -1778.5386 | 0.0000      |
| 8939.2818               | 7482.4722   | 333.4780   | -1456.8097  |
| 333.7303                | -8.8267     | -73.5498   | 664265.7895 |
| -9.8418                 |             |            | -9.8141     |
| [70380]ENERGY: 17200000 | 3720.8870   | 5844.8903  | 5888.8329   |
| 347.4819                | -15423.6564 | -1886.8497 | 0.0000      |
| 8989.1517               | 7480.7377   | 335.3384   | -1508.4140  |
| 333.9294                | 58.1696     | 28.2380    | 664265.7895 |
| -6.3783                 |             |            | -6.4211     |
| [70430]ENERGY: 17210000 | 3593.8403   | 5886.0156  | 5939.4308   |
| 349.5246                | -15526.7700 | -1705.3787 | 0.0000      |
| 8946.3735               | 7483.0360   | 333.7425   | -1463.3374  |
| 333.7914                | 153.0056    | 94.9800    | 664265.7895 |
| -10.4077                |             |            | -10.3870    |
| [70466]ENERGY: 17220000 | 3650.1366   | 5887.3260  | 5893.1961   |
| 374.1656                | -15480.0428 | -1771.6431 | 0.0000      |
| 8932.1280               | 7485.2665   | 333.2111   | -1446.8616  |
| 333.9212                | -13.5415    | 15.7983    | 664265.7895 |
| -8.0533                 |             |            | -8.0600     |
| [70516]ENERGY: 17230000 | 3636.5029   | 5952.2556  | 5907.5172   |
| 375.2587                | -15500.3319 | -1837.6219 | 0.0000      |
| 8942.5164               | 7476.0971   | 333.5986   | -1466.4193  |
| 333.7630                | -24.8691    | -22.2334   | 664265.7895 |
|                         |             |            | -10.3687    |

## Supplementary Text 6

-10.3709  
[70552]ENERGY: 17240000 3676.0632 5880.1442 5919.9269  
352.0597 -15461.6037 -1871.8170 0.0000 0.0000  
8983.7830 7478.5562 335.1381 -1505.2268 7553.9177  
333.6109 -29.6709 -74.1930 664265.7895 -7.6502  
-7.6619  
[70602]ENERGY: 17250000 3681.9714 5882.5162 5933.5832  
379.9470 -15521.8065 -1847.5375 0.0000 0.0000  
8973.4300 7482.1039 334.7519 -1491.3261 7555.6850  
333.7108 64.9516 62.3050 664265.7895 -6.9067  
-6.8824  
[70638]ENERGY: 17260000 3636.1509 5960.3492 5928.0874  
362.3602 -15478.3572 -1824.0519 0.0000 0.0000  
8899.9580 7484.4966 332.0110 -1415.4614 7556.5758  
333.8048 -5.9963 -122.0563 664265.7895 -5.2248  
-5.2509  
[70688]ENERGY: 17270000 3640.1145 5778.7033 5930.0907  
370.7162 -15405.2055 -1884.2466 0.0000 0.0000  
9052.7344 7482.9070 337.7103 -1569.8274 7555.3685  
333.8657 190.1601 144.6188 664265.7895 -3.7457  
-3.7258  
[70724]ENERGY: 17280000 3569.3086 5906.9304 5926.3387  
373.2699 -15439.4560 -1878.9407 0.0000 0.0000  
9022.8533 7480.3042 336.5956 -1542.5491 7555.3512  
334.1398 -69.1747 -99.7412 664265.7895 -2.1839  
-2.1914  
[70774]ENERGY: 17290000 3585.4140 5900.2016 5953.1733  
370.1581 -15565.8220 -1751.7587 0.0000 0.0000  
8990.5826 7481.9489 335.3917 -1508.6338 7555.7546  
333.7876 55.6547 16.4900 664265.7895 -9.3255  
-9.3329  
[70813]ENERGY: 17300000 3550.4427 5893.1112 5945.2203  
327.2260 -15440.5929 -1758.0210 0.0000 0.0000  
8964.9207 7482.3071 334.4344 -1482.6136 7557.1388  
333.5894 214.6049 156.6776 664265.7895 -2.6696  
-2.6758  
[70863]ENERGY: 17310000 3663.7692 5860.0967 5910.7001  
347.4206 -15412.1209 -1889.3633 0.0000 0.0000  
9002.6337 7483.1362 335.8413 -1519.4975 7556.4625  
333.6620 -106.4495 -49.7107 664265.7895 -7.2034  
-7.1950  
[70899]ENERGY: 17320000 3710.3202 5877.4200 5991.6034  
355.7637 -15411.2590 -1911.7359 0.0000 0.0000  
8875.9943 7488.1067 331.1171 -1387.8876 7558.1056  
333.8782 -50.3738 -73.0828 664265.7895 -5.5761  
-5.5641  
[70949]ENERGY: 17330000 3646.4859 5966.7324 5899.4163  
352.7786 -15410.3083 -1886.9988 0.0000 0.0000  
8918.0702 7486.1763 332.6867 -1431.8939 7558.2447  
334.1262 34.1263 20.8494 664265.7895 -3.6407  
-3.6471  
[70985]ENERGY: 17340000 3718.1406 5865.2988 5906.9265  
368.8925 -15454.0762 -1865.0491 0.0000 0.0000  
8949.9805 7490.1136 333.8771 -1459.8668 7558.6607

## Supplementary Text 6

|                         |             |            |             |           |
|-------------------------|-------------|------------|-------------|-----------|
| 334.0994                | -57.6607    | -0.4167    | 664265.7895 | -4.4002   |
| -4.4035                 |             |            |             |           |
| [71035]ENERGY: 17350000 | 3641.5069   | 5887.4014  | 5920.4050   |           |
| 371.2516                | -15355.1237 | -1862.6320 | 0.0000      | 0.0000    |
| 8887.1002               | 7489.9093   | 331.5314   | -1397.1909  | 7557.8868 |
| 333.9766                | -55.9420    | -61.0168   | 664265.7895 | -7.2948   |
| -7.2906                 |             |            |             |           |
| [71071]ENERGY: 17360000 | 3710.2439   | 5936.7579  | 5928.0530   |           |
| 356.5927                | -15456.8101 | -1922.2715 | 0.0000      | 0.0000    |
| 8934.6274               | 7487.1933   | 333.3043   | -1447.4341  | 7559.4998 |
| 333.8671                | -146.5681   | -194.2911  | 664265.7895 | -4.5658   |
| -4.5688                 |             |            |             |           |
| [71121]ENERGY: 17370000 | 3662.4649   | 5941.0643  | 5891.4544   |           |
| 339.8073                | -15300.7200 | -1884.8382 | 0.0000      | 0.0000    |
| 8840.4917               | 7489.7243   | 329.7926   | -1350.7674  | 7559.9547 |
| 333.8640                | 98.4397     | 102.7580   | 664265.7895 | -8.5318   |
| -8.5370                 |             |            |             |           |
| [71157]ENERGY: 17380000 | 3722.0916   | 5908.8896  | 5917.5705   |           |
| 356.9012                | -15518.3466 | -1793.7961 | 0.0000      | 0.0000    |
| 8896.4333               | 7489.7435   | 331.8795   | -1406.6898  | 7559.7949 |
| 333.9707                | 52.2131     | -33.5884   | 664265.7895 | -5.6750   |
| -5.6645                 |             |            |             |           |
| [71207]ENERGY: 17390000 | 3698.8007   | 5827.5896  | 5868.3348   |           |
| 378.0310                | -15432.9614 | -1802.4496 | 0.0000      | 0.0000    |
| 8949.6620               | 7487.0070   | 333.8652   | -1462.6550  | 7559.2002 |
| 333.9870                | 38.5120     | 42.5980    | 664265.7895 | -7.4381   |
| -7.4359                 |             |            |             |           |
| [71246]ENERGY: 17400000 | 3605.3491   | 5866.6453  | 5940.9208   |           |
| 343.4860                | -15498.1975 | -1797.4427 | 0.0000      | 0.0000    |
| 9023.6392               | 7484.4002   | 336.6249   | -1539.2390  | 7558.5097 |
| 333.7284                | -220.3723   | -190.5810  | 664265.7895 | -9.7817   |
| -9.7983                 |             |            |             |           |
| [71296]ENERGY: 17410000 | 3756.7852   | 5889.3433  | 5961.2657   |           |
| 380.4563                | -15464.5781 | -1875.1591 | 0.0000      | 0.0000    |
| 8842.2083               | 7490.3216   | 329.8567   | -1351.8867  | 7558.9142 |
| 333.6435                | 53.6541     | -43.2603   | 664265.7895 | -8.2472   |
| -8.2430                 |             |            |             |           |
| [71332]ENERGY: 17420000 | 3601.3101   | 5946.6043  | 5920.5425   |           |
| 341.6460                | -15409.9016 | -1836.6565 | 0.0000      | 0.0000    |
| 8920.7937               | 7484.3385   | 332.7883   | -1436.4552  | 7558.7337 |
| 333.6420                | -62.7336    | -43.3796   | 664265.7895 | -7.1035   |
| -7.0978                 |             |            |             |           |
| [71382]ENERGY: 17430000 | 3612.7496   | 6038.7345  | 5947.2483   |           |
| 338.3513                | -15522.3161 | -1839.3499 | 0.0000      | 0.0000    |
| 8914.6481               | 7490.0657   | 332.5590   | -1424.5823  | 7558.6127 |
| 333.4705                | -80.3660    | -83.0052   | 664265.7895 | -7.4789   |
| -7.4748                 |             |            |             |           |
| [71418]ENERGY: 17440000 | 3561.9451   | 5961.7546  | 5910.9594   |           |
| 384.4053                | -15416.0675 | -1838.7843 | 0.0000      | 0.0000    |
| 8927.5090               | 7491.7216   | 333.0388   | -1435.7874  | 7558.3475 |
| 333.6082                | 35.6148     | 25.2186    | 664265.7895 | -8.4459   |
| -8.4562                 |             |            |             |           |
| [71468]ENERGY: 17450000 | 3580.1457   | 5877.2702  | 5891.2472   |           |
| 363.9359                | -15369.9866 | -1904.9051 | 0.0000      | 0.0000    |

## Supplementary Text 6

|                         |             |            |             |           |
|-------------------------|-------------|------------|-------------|-----------|
| 9046.5960               | 7484.3033   | 337.4813   | -1562.2927  | 7558.4750 |
| 333.8378                | 92.0651     | 30.1526    | 664265.7895 | -4.9557   |
| -4.9721                 |             |            |             |           |
| [71504]ENERGY: 17460000 | 3621.8513   | 5872.0295  | 5853.1778   |           |
| 380.0427                | -15400.5040 | -1835.4909 | 0.0000      | 0.0000    |
| 8994.2002               | 7485.3066   | 335.5267   | -1508.8936  | 7556.8079 |
| 333.7193                | 37.3825     | -6.3840    | 664265.7895 | -4.1176   |
| -4.0995                 |             |            |             |           |
| [71554]ENERGY: 17470000 | 3710.0888   | 5940.2240  | 5895.4099   |           |
| 344.1173                | -15518.9664 | -1832.6370 | 0.0000      | 0.0000    |
| 8949.6370               | 7487.8735   | 333.8643   | -1461.7635  | 7558.2424 |
| 333.9066                | 69.6776     | 3.7660     | 664265.7895 | -8.5905   |
| -8.5986                 |             |            |             |           |
| [71590]ENERGY: 17480000 | 3649.4532   | 5934.9396  | 5909.3093   |           |
| 367.5174                | -15508.2441 | -1828.2435 | 0.0000      | 0.0000    |
| 8959.0780               | 7483.8100   | 334.2165   | -1475.2680  | 7558.7795 |
| 333.6995                | -161.4724   | -107.5056  | 664265.7895 | -7.7468   |
| -7.7232                 |             |            |             |           |
| [71640]ENERGY: 17490000 | 3636.6162   | 5912.6532  | 5894.4519   |           |
| 361.3933                | -15405.5461 | -1902.2613 | 0.0000      | 0.0000    |
| 8988.4548               | 7485.7619   | 335.3124   | -1502.6929  | 7559.1018 |
| 333.8939                | -175.7725   | -136.0833  | 664265.7895 | -6.1998   |
| -6.2058                 |             |            |             |           |
| [71679]ENERGY: 17500000 | 3623.8626   | 5809.1964  | 5884.1868   |           |
| 368.4251                | -15424.0725 | -1841.5116 | 0.0000      | 0.0000    |
| 9063.8487               | 7483.9356   | 338.1249   | -1579.9131  | 7558.9336 |
| 334.0496                | -4.5007     | -15.6308   | 664265.7895 | -9.2860   |
| -9.2958                 |             |            |             |           |
| [71729]ENERGY: 17510000 | 3691.9316   | 5815.2722  | 5888.4202   |           |
| 365.3963                | -15394.7570 | -1835.4747 | 0.0000      | 0.0000    |
| 8955.5603               | 7486.3488   | 334.0852   | -1469.2115  | 7559.3052 |
| 333.9856                | 34.1866     | 74.3805    | 664265.7895 | -5.7052   |
| -5.6990                 |             |            |             |           |
| [71765]ENERGY: 17520000 | 3681.5653   | 5943.9183  | 5957.7515   |           |
| 341.7022                | -15472.6338 | -1908.6434 | 0.0000      | 0.0000    |
| 8943.7873               | 7487.4473   | 333.6461   | -1456.3399  | 7560.4387 |
| 333.8588                | -38.6019    | 22.2372    | 664265.7895 | -9.1573   |
| -9.1643                 |             |            |             |           |
| [71815]ENERGY: 17530000 | 3622.2219   | 6019.3476  | 5904.9986   |           |
| 366.7779                | -15543.2173 | -1817.0202 | 0.0000      | 0.0000    |
| 8935.8758               | 7488.9843   | 333.3509   | -1446.8915  | 7560.0439 |
| 333.6202                | 165.3166    | 96.0194    | 664265.7895 | -6.4873   |
| -6.4966                 |             |            |             |           |
| [71851]ENERGY: 17540000 | 3622.8991   | 5843.2343  | 5909.8626   |           |
| 354.6805                | -15420.8912 | -1768.5255 | 0.0000      | 0.0000    |
| 8945.3506               | 7486.6104   | 333.7044   | -1458.7402  | 7559.5162 |
| 333.7426                | -0.3627     | -20.0972   | 664265.7895 | -7.3161   |
| -7.3124                 |             |            |             |           |
| [71901]ENERGY: 17550000 | 3640.0582   | 5963.3141  | 5929.6137   |           |
| 350.6712                | -15452.6463 | -1798.9975 | 0.0000      | 0.0000    |
| 8858.6593               | 7490.6726   | 330.4704   | -1367.9867  | 7556.8679 |
| 333.4161                | 5.5744      | -25.6445   | 664265.7895 | -8.3752   |
| -8.3715                 |             |            |             |           |
| [71937]ENERGY: 17560000 | 3647.1603   | 5801.1770  | 5902.0204   |           |

## Supplementary Text 6

|                         |             |            |             |           |
|-------------------------|-------------|------------|-------------|-----------|
| 378.7343                | -15428.7606 | -1814.5818 | 0.0000      | 0.0000    |
| 8999.4395               | 7485.1890   | 335.7222   | -1514.2505  | 7558.6552 |
| 333.3937                | 244.2650    | 204.6607   | 664265.7895 | -12.9767  |
| -12.9706                |             |            |             |           |
| [71987]ENERGY: 17570000 | 3618.2497   | 5865.4463  | 5885.9190   |           |
| 378.9372                | -15433.5719 | -1812.8316 | 0.0000      | 0.0000    |
| 8986.8785               | 7489.0273   | 335.2536   | -1497.8512  | 7558.4284 |
| 333.4233                | 150.5470    | 121.1176   | 664265.7895 | -4.8423   |
| -4.8255                 |             |            |             |           |
| [72023]ENERGY: 17580000 | 3686.9265   | 5888.3202  | 5904.6748   |           |
| 331.8308                | -15420.5805 | -1785.7416 | 0.0000      | 0.0000    |
| 8883.5808               | 7489.0111   | 331.4001   | -1394.5697  | 7559.2992 |
| 333.2419                | 102.0017    | 114.0718   | 664265.7895 | -6.1130   |
| -6.1260                 |             |            |             |           |
| [72073]ENERGY: 17590000 | 3657.7755   | 5966.2743  | 5896.3845   |           |
| 363.4387                | -15415.1733 | -1901.4297 | 0.0000      | 0.0000    |
| 8917.1509               | 7484.4209   | 332.6524   | -1432.7300  | 7558.9340 |
| 333.6450                | -209.4836   | -152.9174  | 664265.7895 | -7.1698   |
| -7.1601                 |             |            |             |           |
| [72112]ENERGY: 17600000 | 3672.0924   | 5927.8246  | 5916.7253   |           |
| 353.0313                | -15535.1187 | -1822.1167 | 0.0000      | 0.0000    |
| 8973.4067               | 7485.8450   | 334.7510   | -1487.5617  | 7561.2947 |
| 333.8799                | 165.7273    | 182.4418   | 664265.7895 | -5.1907   |
| -5.2117                 |             |            |             |           |
| [72162]ENERGY: 17610000 | 3645.0124   | 5964.1436  | 5929.8099   |           |
| 349.6256                | -15497.4126 | -1916.9164 | 0.0000      | 0.0000    |
| 9013.9600               | 7488.2226   | 336.2638   | -1525.7375  | 7562.7304 |
| 333.9390                | -28.6378    | -35.6276   | 664265.7895 | -9.1683   |
| -9.1618                 |             |            |             |           |
| [72198]ENERGY: 17620000 | 3643.3977   | 5983.0129  | 5931.2508   |           |
| 373.6743                | -15427.5535 | -1876.7097 | 0.0000      | 0.0000    |
| 8865.3840               | 7492.4564   | 330.7212   | -1372.9275  | 7562.8787 |
| 333.9059                | 143.0336    | 45.7689    | 664265.7895 | -4.4052   |
| -4.4069                 |             |            |             |           |
| [72248]ENERGY: 17630000 | 3557.1410   | 5906.3929  | 5976.3190   |           |
| 377.1909                | -15412.8952 | -1905.2773 | 0.0000      | 0.0000    |
| 8990.8889               | 7489.7602   | 335.4032   | -1501.1287  | 7561.1023 |
| 334.0574                | -40.5813    | -62.7910   | 664265.7895 | -4.4385   |
| -4.4353                 |             |            |             |           |
| [72284]ENERGY: 17640000 | 3557.4174   | 5854.1819  | 5964.4518   |           |
| 335.8129                | -15431.3050 | -1813.3467 | 0.0000      | 0.0000    |
| 9021.1150               | 7488.3272   | 336.5308   | -1532.7878  | 7563.5781 |
| 333.9522                | 87.5517     | 63.3667    | 664265.7895 | -9.3184   |
| -9.3231                 |             |            |             |           |
| [72334]ENERGY: 17650000 | 3551.2770   | 5940.6151  | 5911.8401   |           |
| 377.0854                | -15452.4143 | -1749.2902 | 0.0000      | 0.0000    |
| 8913.8520               | 7492.9651   | 332.5293   | -1420.8869  | 7561.9956 |
| 333.9627                | 166.0714    | 109.2931   | 664265.7895 | -4.9652   |
| -4.9723                 |             |            |             |           |
| [72370]ENERGY: 17660000 | 3672.4590   | 5957.5333  | 5940.0127   |           |
| 371.8320                | -15379.4026 | -1903.4100 | 0.0000      | 0.0000    |
| 8837.5860               | 7496.6105   | 329.6842   | -1340.9755  | 7563.5164 |
| 333.7814                | -102.0949   | -136.0290  | 664265.7895 | -6.3858   |
| -6.3850                 |             |            |             |           |

## Supplementary Text 6

|                         |             |            |             |           |
|-------------------------|-------------|------------|-------------|-----------|
| [72420]ENERGY: 17670000 | 3635.1737   | 6007.2950  | 5980.5332   |           |
| 381.2027                | -15524.7044 | -1830.8717 | 0.0000      | 0.0000    |
| 8841.3711               | 7489.9995   | 329.8254   | -1351.3715  | 7562.5491 |
| 333.7710                | -13.5971    | -39.2845   | 664265.7895 | -7.3343   |
| -7.3399                 |             |            |             |           |
| [72456]ENERGY: 17680000 | 3652.7415   | 5927.9596  | 5923.1901   |           |
| 356.3901                | -15475.9893 | -1870.9309 | 0.0000      | 0.0000    |
| 8978.5263               | 7491.8873   | 334.9420   | -1486.6390  | 7564.3393 |
| 333.6367                | -101.1968   | -142.8135  | 664265.7895 | -6.7123   |
| -6.6973                 |             |            |             |           |
| [72506]ENERGY: 17690000 | 3615.9263   | 5798.8741  | 5950.1812   |           |
| 372.9252                | -15455.7418 | -1884.2467 | 0.0000      | 0.0000    |
| 9093.3428               | 7491.2611   | 339.2252   | -1602.0817  | 7565.2680 |
| 333.7244                | 49.1968     | 59.9114    | 664265.7895 | -12.9325  |
| -12.9383                |             |            |             |           |
| [72545]ENERGY: 17700000 | 3596.2690   | 5899.7274  | 5919.9975   |           |
| 353.7069                | -15455.5223 | -1782.5407 | 0.0000      | 0.0000    |
| 8959.2627               | 7490.9005   | 334.2234   | -1468.3622  | 7565.6979 |
| 333.5886                | 174.3536    | 158.9905   | 664265.7895 | -8.3032   |
| -8.2821                 |             |            |             |           |
| [72595]ENERGY: 17710000 | 3666.2587   | 5985.0859  | 5904.2200   |           |
| 362.5886                | -15452.0831 | -1837.0759 | 0.0000      | 0.0000    |
| 8866.8062               | 7495.8004   | 330.7743   | -1371.0058  | 7566.5700 |
| 333.7553                | 85.2465     | -12.0384   | 664265.7895 | -10.7341  |
| -10.7618                |             |            |             |           |
| [72631]ENERGY: 17720000 | 3671.1395   | 6010.6581  | 5888.3313   |           |
| 353.7137                | -15461.7673 | -1901.2681 | 0.0000      | 0.0000    |
| 8936.4725               | 7497.2798   | 333.3732   | -1439.1927  | 7566.3324 |
| 333.8897                | 96.3764     | 0.1962     | 664265.7895 | -10.7919  |
| -10.7797                |             |            |             |           |
| [72681]ENERGY: 17730000 | 3645.4294   | 5836.8978  | 5900.0646   |           |
| 346.0641                | -15455.2674 | -1827.2487 | 0.0000      | 0.0000    |
| 9047.8341               | 7493.7739   | 337.5275   | -1554.0603  | 7567.4711 |
| 333.8595                | -34.5848    | 0.6906     | 664265.7895 | -11.8577  |
| -11.8647                |             |            |             |           |
| [72717]ENERGY: 17740000 | 3712.0471   | 5865.4200  | 5950.5652   |           |
| 378.5991                | -15454.9290 | -1871.0111 | 0.0000      | 0.0000    |
| 8920.4051               | 7501.0964   | 332.7738   | -1419.3086  | 7569.1517 |
| 333.7882                | -19.6615    | -104.6253  | 664265.7895 | -13.1149  |
| -13.1188                |             |            |             |           |
| [72767]ENERGY: 17750000 | 3670.8801   | 5915.8468  | 5915.5396   |           |
| 348.9379                | -15426.9121 | -1903.4195 | 0.0000      | 0.0000    |
| 8975.3907               | 7496.2634   | 334.8250   | -1479.1273  | 7568.4810 |
| 333.6686                | -11.8492    | -112.0530  | 664265.7895 | -12.1076  |
| -12.0955                |             |            |             |           |
| [72803]ENERGY: 17760000 | 3643.8264   | 5855.5153  | 5982.9653   |           |
| 366.6466                | -15444.9948 | -1890.3724 | 0.0000      | 0.0000    |
| 8981.7708               | 7495.3572   | 335.0630   | -1486.4136  | 7570.4432 |
| 333.6114                | -42.2844    | -52.8034   | 664265.7895 | -12.6416  |
| -12.6330                |             |            |             |           |
| [72853]ENERGY: 17770000 | 3616.8245   | 5980.9723  | 5941.0985   |           |
| 356.5277                | -15457.1087 | -1834.0478 | 0.0000      | 0.0000    |
| 8896.3561               | 7500.6228   | 331.8766   | -1395.7333  | 7569.5044 |
| 333.7767                | 9.3338      | 28.3344    | 664265.7895 | -12.3486  |

## Supplementary Text 6

-12.3403  
[72889]ENERGY: 17780000      3664.5010      5906.0943      5908.8464  
359.0185      -15395.3014      -1811.2839      0.0000      0.0000  
8871.3889      7503.2639      330.9453      -1368.1250      7570.3018  
333.9449      32.9864      -56.1560      664265.7895      -8.9644  
-8.9842  
[72939]ENERGY: 17790000      3590.9693      5900.5357      5899.2301  
352.5813      -15409.8904      -1849.0716      0.0000      0.0000  
9015.8975      7500.2520      336.3361      -1515.6455      7569.3884  
334.1208      45.3223      11.3568      664265.7895      -9.6638  
-9.6646  
[72978]ENERGY: 17800000      3630.1702      5925.6410      5954.3724  
370.9966      -15483.4401      -1877.2850      0.0000      0.0000  
8977.1208      7497.5760      334.8896      -1479.5449      7569.7313  
333.7425      -1.2303      -54.1194      664265.7895      -10.2872  
-10.2901  
[73028]ENERGY: 17810000      3642.7256      5789.3029      6001.2924  
347.8828      -15460.5998      -1820.7719      0.0000      0.0000  
8998.0200      7497.8520      335.6692      -1500.1680      7569.2472  
333.7414      149.5847      144.8762      664265.7895      -13.0522  
-13.0340  
[73064]ENERGY: 17820000      3660.5396      5891.4129      5852.7892  
370.0443      -15409.7752      -1816.0375      0.0000      0.0000  
8948.7420      7497.7153      333.8309      -1451.0267      7570.5857  
333.8373      24.4830      53.7395      664265.7895      -12.2672  
-12.2842  
[73114]ENERGY: 17830000      3655.4908      5855.1245      5940.7217  
379.6132      -15514.0852      -1879.9554      0.0000      0.0000  
9060.1553      7497.0650      337.9871      -1563.0903      7570.2686  
333.8170      -235.4649      -203.0928      664265.7895      -11.9046  
-11.9008  
[73150]ENERGY: 17840000      3611.2754      5967.5979      5910.1564  
362.6083      -15451.0676      -1826.7450      0.0000      0.0000  
8926.1292      7499.9546      332.9873      -1426.1745      7571.4322  
333.7581      155.1920      81.7653      664265.7895      -18.4056  
-18.4250  
[73200]ENERGY: 17850000      3700.3000      5899.8889      5914.6932  
386.1992      -15420.9736      -1870.7914      0.0000      0.0000  
8891.5679      7500.8842      331.6980      -1390.6837      7573.5787  
333.8503      82.4586      103.7151      664265.7895      -15.0023  
-14.9876  
[73236]ENERGY: 17860000      3673.7014      6031.9848      5846.9295  
363.0576      -15543.4193      -1847.1819      0.0000      0.0000  
8975.8396      7500.9118      334.8418      -1474.9279      7572.1636  
333.7485      0.7154      20.4110      664265.7895      -15.4784  
-15.4846  
[73286]ENERGY: 17870000      3660.0775      6029.9604      5875.4233  
345.0677      -15437.3423      -1863.6830      0.0000      0.0000  
8891.0790      7500.5826      331.6798      -1390.4964      7572.5132  
333.8687      79.6938      67.0485      664265.7895      -14.5221  
-14.5063  
[73322]ENERGY: 17880000      3630.4269      5935.5543      5899.7908  
372.7372      -15483.5204      -1824.9231      0.0000      0.0000  
8967.1966      7497.2623      334.5193      -1469.9343      7571.9375

## Supplementary Text 6

|                         |             |            |             |           |
|-------------------------|-------------|------------|-------------|-----------|
| 334.0157                | -149.7019   | -75.8135   | 664265.7895 | -18.4849  |
| -18.5079                |             |            |             |           |
| [73372]ENERGY: 17890000 | 3612.5685   | 5868.1595  | 5953.9434   |           |
| 367.3415                | -15425.1390 | -1822.8010 | 0.0000      | 0.0000    |
| 8948.1327               | 7502.2055   | 333.8082   | -1445.9272  | 7573.7612 |
| 334.0778                | -28.5336    | -149.2800  | 664265.7895 | -18.8145  |
| -18.8133                |             |            |             |           |
| [73411]ENERGY: 17900000 | 3715.2683   | 5927.0727  | 5853.1971   |           |
| 363.9098                | -15422.0042 | -1890.8235 | 0.0000      | 0.0000    |
| 8955.8287               | 7502.4490   | 334.0953   | -1453.3797  | 7573.8006 |
| 334.0589                | -206.9220   | -203.6333  | 664265.7895 | -14.3298  |
| -14.3139                |             |            |             |           |
| [73461]ENERGY: 17910000 | 3623.5510   | 5873.7519  | 5918.5470   |           |
| 366.8552                | -15402.1519 | -1861.0385 | 0.0000      | 0.0000    |
| 8988.9160               | 7508.4306   | 335.3296   | -1480.4854  | 7573.6773 |
| 334.0440                | 132.6435    | 67.9233    | 664265.7895 | -17.5608  |
| -17.5621                |             |            |             |           |
| [73497]ENERGY: 17920000 | 3604.4554   | 5871.8039  | 5851.7524   |           |
| 383.1410                | -15411.6682 | -1846.7429 | 0.0000      | 0.0000    |
| 9046.3582               | 7499.0997   | 337.4724   | -1547.2584  | 7574.2927 |
| 334.0111                | -78.4561    | -82.2623   | 664265.7895 | -12.3236  |
| -12.3090                |             |            |             |           |
| [73547]ENERGY: 17930000 | 3692.4060   | 5908.4678  | 5938.4076   |           |
| 377.5711                | -15449.5960 | -1855.5900 | 0.0000      | 0.0000    |
| 8890.3451               | 7502.0116   | 331.6524   | -1388.3335  | 7576.3863 |
| 334.1721                | -14.0184    | 6.4809     | 664265.7895 | -11.0012  |
| -11.0295                |             |            |             |           |
| [73583]ENERGY: 17940000 | 3675.7074   | 5943.6302  | 5921.8673   |           |
| 372.3176                | -15409.8068 | -1855.2080 | 0.0000      | 0.0000    |
| 8857.8644               | 7506.3720   | 330.4407   | -1351.4924  | 7575.4301 |
| 334.1015                | -26.7522    | 21.6659    | 664265.7895 | -16.1924  |
| -16.1701                |             |            |             |           |
| [73633]ENERGY: 17950000 | 3764.8329   | 5883.3640  | 5939.3446   |           |
| 365.7973                | -15512.9359 | -1874.3055 | 0.0000      | 0.0000    |
| 8936.0478               | 7502.1452   | 333.3573   | -1433.9026  | 7575.0833 |
| 334.1255                | -101.1220   | -74.8732   | 664265.7895 | -16.1720  |
| -16.1823                |             |            |             |           |
| [73669]ENERGY: 17960000 | 3733.9932   | 5915.4857  | 5913.4754   |           |
| 366.7298                | -15422.5481 | -1900.8823 | 0.0000      | 0.0000    |
| 8898.2415               | 7504.4953   | 331.9470   | -1393.7462  | 7575.5754 |
| 334.3165                | 0.2797      | -37.7236   | 664265.7895 | -19.1562  |
| -19.1760                |             |            |             |           |
| [73719]ENERGY: 17970000 | 3688.0709   | 5969.6321  | 5905.6740   |           |
| 369.3816                | -15448.1112 | -1793.7805 | 0.0000      | 0.0000    |
| 8817.3427               | 7508.2096   | 328.9291   | -1309.1331  | 7576.5711 |
| 334.2465                | -21.2108    | -34.8478   | 664265.7895 | -16.0954  |
| -16.0784                |             |            |             |           |
| [73755]ENERGY: 17980000 | 3707.0768   | 5989.6985  | 5845.0502   |           |
| 375.0364                | -15443.9065 | -1875.5870 | 0.0000      | 0.0000    |
| 8908.1362               | 7505.5047   | 332.3161   | -1402.6315  | 7575.2777 |
| 334.2949                | -178.2988   | -102.6863  | 664265.7895 | -16.9075  |
| -16.8980                |             |            |             |           |
| [73805]ENERGY: 17990000 | 3660.3123   | 5866.9823  | 5863.6986   |           |
| 354.2563                | -15471.4406 | -1801.7442 | 0.0000      | 0.0000    |



## Supplementary Text 6

|                         |             |            |             |           |
|-------------------------|-------------|------------|-------------|-----------|
| 9029.4823               | 7501.5471   | 336.8429   | -1527.9352  | 7576.8465 |
| 334.3944                | 40.0847     | -62.2651   | 664265.7895 | -16.4579  |
| -16.4750                |             |            |             |           |
| [73844]ENERGY: 18000000 | 3534.8349   | 5967.2269  | 5852.4137   |           |
| 366.6799                | -15465.7910 | -1806.5178 | 0.0000      | 0.0000    |
| 9051.2668               | 7500.1133   | 337.6556   | -1551.1535  | 7577.2322 |
| 334.2279                | 82.1217     | 96.1260    | 664265.7895 | -15.0382  |
| -15.0310                |             |            |             |           |
| [73894]ENERGY: 18010000 | 3651.1171   | 5892.5563  | 5969.6610   |           |
| 362.1486                | -15462.8636 | -1831.7576 | 0.0000      | 0.0000    |
| 8922.5561               | 7503.4179   | 332.8540   | -1419.1382  | 7576.3016 |
| 334.2282                | -48.7470    | 29.2845    | 664265.7895 | -12.2716  |
| -12.2688                |             |            |             |           |
| [73930]ENERGY: 18020000 | 3709.0373   | 5873.4694  | 5907.8280   |           |
| 335.4036                | -15404.1036 | -1819.9283 | 0.0000      | 0.0000    |
| 8902.3278               | 7504.0342   | 332.0994   | -1398.2937  | 7574.6824 |
| 334.2475                | -72.8009    | -54.9496   | 664265.7895 | -12.0725  |
| -12.0479                |             |            |             |           |
| [73980]ENERGY: 18030000 | 3662.8955   | 5935.9855  | 5937.8392   |           |
| 354.3664                | -15436.6415 | -1893.3531 | 0.0000      | 0.0000    |
| 8940.5830               | 7501.6750   | 333.5265   | -1438.9080  | 7576.6452 |
| 334.2904                | -112.2093   | -141.1696  | 664265.7895 | -9.1414   |
| -9.1632                 |             |            |             |           |
| [74016]ENERGY: 18040000 | 3688.9135   | 5842.5243  | 5881.6482   |           |
| 379.0105                | -15365.7680 | -1900.9821 | 0.0000      | 0.0000    |
| 8978.0266               | 7503.3729   | 334.9233   | -1474.6537  | 7575.6971 |
| 334.4266                | -167.3533   | -159.6106  | 664265.7895 | -13.9003  |
| -13.9123                |             |            |             |           |
| [74066]ENERGY: 18050000 | 3745.3761   | 5827.2766  | 5903.6725   |           |
| 367.1774                | -15398.7758 | -1883.9095 | 0.0000      | 0.0000    |
| 8941.5329               | 7502.3503   | 333.5620   | -1439.1826  | 7574.8168 |
| 334.3290                | 22.4049     | -5.3190    | 664265.7895 | -12.6979  |
| -12.6800                |             |            |             |           |
| [74102]ENERGY: 18060000 | 3714.7828   | 5966.8785  | 5869.8992   |           |
| 371.4519                | -15349.0509 | -1923.4091 | 0.0000      | 0.0000    |
| 8856.8130               | 7507.3654   | 330.4015   | -1349.4477  | 7575.6410 |
| 334.1054                | -38.4657    | -57.7095   | 664265.7895 | -12.5595  |
| -12.5675                |             |            |             |           |
| [74152]ENERGY: 18070000 | 3625.4180   | 5953.5166  | 5840.1747   |           |
| 361.8199                | -15391.0998 | -1805.9477 | 0.0000      | 0.0000    |
| 8923.1162               | 7506.9978   | 332.8749   | -1416.1184  | 7576.0630 |
| 334.3932                | 104.7897    | -19.7561   | 664265.7895 | -11.8190  |
| -11.8209                |             |            |             |           |
| [74188]ENERGY: 18080000 | 3624.4886   | 5909.7420  | 5850.5692   |           |
| 341.7505                | -15404.3480 | -1884.4629 | 0.0000      | 0.0000    |
| 9061.6403               | 7499.3797   | 338.0425   | -1562.2606  | 7575.9136 |
| 334.0450                | -21.9409    | -61.9316   | 664265.7895 | -17.2290  |
| -17.2228                |             |            |             |           |
| [74238]ENERGY: 18090000 | 3639.4902   | 5892.4491  | 5899.3188   |           |
| 338.0878                | -15408.3362 | -1877.0880 | 0.0000      | 0.0000    |
| 9018.9944               | 7502.9161   | 336.4516   | -1516.0783  | 7576.0138 |
| 334.1700                | -52.8509    | -84.2445   | 664265.7895 | -13.9964  |
| -13.9938                |             |            |             |           |
| [74277]ENERGY: 18100000 | 3574.8895   | 5868.5270  | 5900.2098   |           |

## Supplementary Text 6

|                         |             |            |             |           |
|-------------------------|-------------|------------|-------------|-----------|
| 360.6218                | -15441.8632 | -1880.4086 | 0.0000      | 0.0000    |
| 9120.2996               | 7502.2759   | 340.2308   | -1618.0238  | 7575.5931 |
| 334.0486                | 23.8998     | -24.2931   | 664265.7895 | -10.7602  |
| -10.7501                |             |            |             |           |
| [74327]ENERGY: 18110000 | 3676.3741   | 5926.7956  | 5894.5121   |           |
| 340.0872                | -15426.5595 | -1903.3007 | 0.0000      | 0.0000    |
| 8993.1155               | 7501.0242   | 335.4862   | -1492.0913  | 7575.0533 |
| 334.1858                | 32.2625     | -26.6151   | 664265.7895 | -11.9313  |
| -11.9493                |             |            |             |           |
| [74363]ENERGY: 18120000 | 3691.6673   | 5907.7462  | 5922.5812   |           |
| 384.6411                | -15426.4609 | -1860.6631 | 0.0000      | 0.0000    |
| 8883.2610               | 7502.7729   | 331.3881   | -1380.4882  | 7576.3004 |
| 334.4090                | 16.1163     | -9.1688    | 664265.7895 | -14.4474  |
| -14.4305                |             |            |             |           |
| [74413]ENERGY: 18130000 | 3681.5889   | 5843.4587  | 5895.9708   |           |
| 341.6396                | -15403.5223 | -1848.3278 | 0.0000      | 0.0000    |
| 8993.1998               | 7504.0077   | 335.4894   | -1489.1921  | 7576.2359 |
| 334.1107                | -30.0404    | -127.7970  | 664265.7895 | -11.0184  |
| -11.0298                |             |            |             |           |
| [74449]ENERGY: 18140000 | 3671.4058   | 5868.0615  | 5888.6182   |           |
| 358.3799                | -15356.6804 | -1833.4066 | 0.0000      | 0.0000    |
| 8908.9431               | 7505.3216   | 332.3462   | -1403.6215  | 7576.0430 |
| 334.4810                | 98.3799     | -123.3100  | 664265.7895 | -10.4846  |
| -10.4967                |             |            |             |           |
| [74499]ENERGY: 18150000 | 3631.4163   | 5958.9092  | 5906.1129   |           |
| 370.2537                | -15389.0177 | -1933.8320 | 0.0000      | 0.0000    |
| 8958.9423               | 7502.7847   | 334.2114   | -1456.1576  | 7575.7155 |
| 334.3497                | -19.9378    | -36.7521   | 664265.7895 | -11.0336  |
| -11.0220                |             |            |             |           |
| [74535]ENERGY: 18160000 | 3609.5318   | 5949.2674  | 5902.5499   |           |
| 374.7338                | -15380.0020 | -1859.8645 | 0.0000      | 0.0000    |
| 8910.2928               | 7506.5093   | 332.3966   | -1403.7835  | 7575.3260 |
| 334.1809                | 40.3289     | -11.5424   | 664265.7895 | -12.2106  |
| -12.2133                |             |            |             |           |
| [74585]ENERGY: 18170000 | 3661.4652   | 5992.1807  | 5910.3225   |           |
| 365.3543                | -15539.5206 | -1825.2001 | 0.0000      | 0.0000    |
| 8939.5896               | 7504.1917   | 333.4895   | -1435.3980  | 7575.2761 |
| 334.4806                | -99.3722    | -63.6099   | 664265.7895 | -12.2354  |
| -12.2260                |             |            |             |           |
| [74621]ENERGY: 18180000 | 3631.0857   | 5864.5345  | 5918.6386   |           |
| 357.8035                | -15486.1333 | -1866.1167 | 0.0000      | 0.0000    |
| 9080.4620               | 7500.2744   | 338.7447   | -1580.1876  | 7577.1945 |
| 334.5625                | 138.7562    | 72.3007    | 664265.7895 | -15.9117  |
| -15.9385                |             |            |             |           |
| [74671]ENERGY: 18190000 | 3618.6932   | 6004.6672  | 5913.7269   |           |
| 379.5804                | -15499.1923 | -1825.7418 | 0.0000      | 0.0000    |
| 8912.3336               | 7504.0673   | 332.4727   | -1408.2663  | 7575.7358 |
| 334.4190                | 95.9975     | -6.8229    | 664265.7895 | -7.2130   |
| -7.2112                 |             |            |             |           |
| [74710]ENERGY: 18200000 | 3631.6475   | 5869.1339  | 5919.1867   |           |
| 359.2972                | -15377.7095 | -1926.7676 | 0.0000      | 0.0000    |
| 9026.6668               | 7501.4551   | 336.7379   | -1525.2118  | 7575.3460 |
| 334.2284                | -61.2481    | -55.3486   | 664265.7895 | -12.6926  |
| -12.6779                |             |            |             |           |

## Supplementary Text 6

|                         |             |            |             |           |
|-------------------------|-------------|------------|-------------|-----------|
| [74760]ENERGY: 18210000 | 3675.8446   | 5852.2859  | 5862.0590   |           |
| 357.3040                | -15421.5660 | -1838.8139 | 0.0000      | 0.0000    |
| 9013.1723               | 7500.2858   | 336.2344   | -1512.8865  | 7575.8847 |
| 334.2887                | -59.4364    | 16.7128    | 664265.7895 | -13.3372  |
| -13.3395                |             |            |             |           |
| [74796]ENERGY: 18220000 | 3711.0756   | 5950.4116  | 5875.0047   |           |
| 389.4520                | -15577.0829 | -1848.5295 | 0.0000      | 0.0000    |
| 9000.2343               | 7500.5658   | 335.7518   | -1499.6685  | 7575.0231 |
| 334.3213                | -30.2082    | -82.3665   | 664265.7895 | -10.9752  |
| -10.9785                |             |            |             |           |
| [74846]ENERGY: 18230000 | 3621.6085   | 5928.5077  | 5925.0429   |           |
| 365.7929                | -15442.7395 | -1812.8612 | 0.0000      | 0.0000    |
| 8920.5952               | 7505.9465   | 332.7809   | -1414.6488  | 7575.5201 |
| 334.2792                | 74.8731     | 98.7617    | 664265.7895 | -7.0669   |
| -7.0492                 |             |            |             |           |
| [74882]ENERGY: 18240000 | 3699.7540   | 5968.1362  | 5921.9006   |           |
| 372.1709                | -15445.2467 | -1924.7505 | 0.0000      | 0.0000    |
| 8908.8128               | 7500.7774   | 332.3413   | -1408.0355  | 7574.6496 |
| 334.1081                | -269.7831   | -239.5329  | 664265.7895 | -9.2988   |
| -9.3161                 |             |            |             |           |
| [74932]ENERGY: 18250000 | 3682.2459   | 5929.2605  | 5913.4550   |           |
| 381.5009                | -15436.6375 | -1883.8925 | 0.0000      | 0.0000    |
| 8918.8879               | 7504.8203   | 332.7172   | -1414.0676  | 7576.7749 |
| 334.2950                | -95.0826    | -103.9235  | 664265.7895 | -10.0015  |
| -9.9751                 |             |            |             |           |
| [74968]ENERGY: 18260000 | 3641.2496   | 5872.1183  | 5936.7822   |           |
| 388.7470                | -15483.2398 | -1869.2975 | 0.0000      | 0.0000    |
| 9019.8038               | 7506.1636   | 336.4818   | -1513.6401  | 7576.0761 |
| 334.4383                | 49.2457     | 1.1163     | 664265.7895 | -5.7207   |
| -5.7385                 |             |            |             |           |
| [75018]ENERGY: 18270000 | 3596.8116   | 5975.4207  | 5913.9372   |           |
| 344.5648                | -15374.1501 | -1882.0292 | 0.0000      | 0.0000    |
| 8928.9538               | 7503.5089   | 333.0927   | -1425.4450  | 7575.6805 |
| 334.6485                | 334.3369    | 152.3933   | 664265.7895 | -9.3640   |
| -9.3797                 |             |            |             |           |
| [75054]ENERGY: 18280000 | 3672.3339   | 5967.2986  | 5922.8679   |           |
| 388.3532                | -15554.0530 | -1821.1509 | 0.0000      | 0.0000    |
| 8927.2067               | 7502.8564   | 333.0275   | -1424.3503  | 7574.0269 |
| 334.3225                | 77.4238     | 30.8738    | 664265.7895 | -11.8463  |
| -11.8544                |             |            |             |           |
| [75104]ENERGY: 18290000 | 3641.4754   | 5863.5597  | 5895.5097   |           |
| 365.0645                | -15389.8101 | -1826.4655 | 0.0000      | 0.0000    |
| 8955.5473               | 7504.8810   | 334.0848   | -1450.6664  | 7575.0002 |
| 334.3124                | 111.9532    | 92.4552    | 664265.7895 | -9.3901   |
| -9.3632                 |             |            |             |           |
| [75143]ENERGY: 18300000 | 3770.0356   | 5901.6765  | 5980.4604   |           |
| 362.1340                | -15482.1587 | -1906.9982 | 0.0000      | 0.0000    |
| 8882.8139               | 7507.9636   | 331.3715   | -1374.8504  | 7577.5622 |
| 334.2472                | -34.0661    | -68.2011   | 664265.7895 | -9.9001   |
| -9.9143                 |             |            |             |           |
| [75193]ENERGY: 18310000 | 3569.2241   | 5866.1945  | 5876.5862   |           |
| 355.9332                | -15422.1314 | -1817.1063 | 0.0000      | 0.0000    |
| 9075.6542               | 7504.3545   | 338.5653   | -1571.2997  | 7577.5027 |
| 334.2738                | 34.2400     | -1.3988    | 664265.7895 | -8.3968   |

Supplementary Text 6

-8.3914  
 [75229]ENERGY: 18320000 3717.7079 5896.7061 5899.8079  
 347.6288 -15445.8188 -1891.4981 0.0000 0.0000  
 8979.9674 7504.5012 334.9957 -1475.4662 7576.8111  
 334.4089 -71.1917 -158.4241 664265.7895 -11.5499  
 -11.5437  
 [75279]ENERGY: 18330000 3641.4633 5949.4390 5881.4594  
 352.7758 -15427.5515 -1856.7303 0.0000 0.0000  
 8962.0423 7502.8980 334.3271 -1459.1443 7576.7914  
 334.1771 -48.2547 -112.0966 664265.7895 -11.1611  
 -11.1509  
 [75315]ENERGY: 18340000 3656.5168 5877.4892 5905.4883  
 356.6768 -15415.1915 -1834.4591 0.0000 0.0000  
 8958.7500 7505.2704 334.2042 -1453.4795 7576.5126  
 334.5033 -93.5498 -93.7817 664265.7895 -14.6268  
 -14.6449  
 [75365]ENERGY: 18350000 3764.6369 5752.0338 5983.9536  
 364.2867 -15405.0558 -1881.4238 0.0000 0.0000  
 8929.0708 7507.5022 333.0971 -1421.5686 7578.3064  
 334.5659 -80.9374 -76.9903 664265.7895 -9.7792  
 -9.7680  
 [75401]ENERGY: 18360000 3689.2939 5884.9175 5940.6492  
 386.1517 -15467.4820 -1878.0438 0.0000 0.0000  
 8951.2425 7506.7291 333.9242 -1444.5135 7576.1522  
 334.3483 71.4849 59.4187 664265.7895 -13.1370  
 -13.1470  
 [75451]ENERGY: 18370000 3492.8808 5932.3142 5955.8684  
 367.1576 -15426.0944 -1824.0694 0.0000 0.0000  
 9006.1940 7504.2513 335.9741 -1501.9427 7578.0766  
 334.3962 156.5157 170.8348 664265.7895 -10.5871  
 -10.5766  
 [75487]ENERGY: 18380000 3583.9533 5881.8888 5894.7039  
 376.3374 -15388.2312 -1891.3603 0.0000 0.0000  
 9047.1556 7504.4474 337.5022 -1542.7082 7576.8254  
 334.2926 -2.7142 -88.4703 664265.7895 -9.1763  
 -9.1967  
 [75537]ENERGY: 18390000 3644.4247 5870.6407 5891.8561  
 358.3442 -15408.7450 -1826.3970 0.0000 0.0000  
 8974.8713 7504.9951 334.8056 -1469.8762 7577.9261  
 334.3577 -156.5484 -69.3602 664265.7895 -6.3070  
 -6.3152  
 [75576]ENERGY: 18400000 3635.2776 5849.8246 5935.2925  
 361.1066 -15448.3991 -1830.8374 0.0000 0.0000  
 9006.9760 7509.2409 336.0033 -1497.7351 7580.3135  
 334.2678 67.3914 17.8482 664265.7895 -8.6686  
 -8.6495  
 [75626]ENERGY: 18410000 3587.1193 5846.6304 5937.4218  
 369.1937 -15359.9444 -1843.3543 0.0000 0.0000  
 8974.8667 7511.9332 334.8055 -1462.9335 7578.6476  
 334.2534 8.2821 55.4122 664265.7895 -8.3996  
 -8.3979  
 [75662]ENERGY: 18420000 3660.2965 5826.7415 5948.3257  
 369.6515 -15307.9826 -1977.2607 0.0000 0.0000  
 8988.4409 7508.2128 335.3118 -1480.2281 7580.3706

## Supplementary Text 6

|                         |             |            |             |           |
|-------------------------|-------------|------------|-------------|-----------|
| 334.3705                | -45.8971    | -133.1336  | 664265.7895 | -9.0785   |
| -9.0625                 |             |            |             |           |
| [75712]ENERGY: 18430000 | 3678.5096   | 5948.3613  | 5902.5755   |           |
| 364.2413                | -15485.2321 | -1852.1134 | 0.0000      | 0.0000    |
| 8949.5974               | 7505.9394   | 333.8628   | -1443.6580  | 7580.6778 |
| 334.4612                | 23.5217     | -49.6313   | 664265.7895 | -7.6895   |
| -7.6997                 |             |            |             |           |
| [75748]ENERGY: 18440000 | 3566.9399   | 5916.4071  | 5937.9858   |           |
| 353.1090                | -15422.4884 | -1833.6586 | 0.0000      | 0.0000    |
| 8990.4497               | 7508.7445   | 335.3868   | -1481.7052  | 7582.5943 |
| 334.2376                | 151.3524    | 173.4837   | 664265.7895 | -13.4030  |
| -13.4074                |             |            |             |           |
| [75798]ENERGY: 18450000 | 3660.6922   | 5876.4874  | 5955.4317   |           |
| 355.9632                | -15454.2854 | -1850.0781 | 0.0000      | 0.0000    |
| 8962.7847               | 7506.9957   | 334.3548   | -1455.7890  | 7580.9515 |
| 334.4934                | 72.0073     | 97.6878    | 664265.7895 | -12.5571  |
| -12.5420                |             |            |             |           |
| [75834]ENERGY: 18460000 | 3665.6724   | 5898.0535  | 5923.7134   |           |
| 335.6005                | -15379.7982 | -1866.9028 | 0.0000      | 0.0000    |
| 8932.6530               | 7508.9918   | 333.2307   | -1423.6612  | 7583.1074 |
| 334.5135                | 150.4880    | 46.7010    | 664265.7895 | -9.3627   |
| -9.3880                 |             |            |             |           |
| [75884]ENERGY: 18470000 | 3664.6937   | 5891.0602  | 5923.0651   |           |
| 373.4722                | -15370.7825 | -1895.9484 | 0.0000      | 0.0000    |
| 8923.6003               | 7509.1604   | 332.8930   | -1414.4398  | 7582.3037 |
| 334.5354                | -6.3206     | 26.0445    | 664265.7895 | -10.5199  |
| -10.5015                |             |            |             |           |
| [75920]ENERGY: 18480000 | 3643.0650   | 5822.3070  | 5948.3058   |           |
| 373.6387                | -15368.9211 | -1906.8823 | 0.0000      | 0.0000    |
| 8999.6332               | 7511.1462   | 335.7294   | -1488.4869  | 7582.7868 |
| 334.5567                | 127.8486    | 29.6573    | 664265.7895 | -9.4468   |
| -9.4312                 |             |            |             |           |
| [75970]ENERGY: 18490000 | 3639.7515   | 5969.0164  | 5940.4767   |           |
| 372.4310                | -15421.1057 | -1876.0938 | 0.0000      | 0.0000    |
| 8888.2331               | 7512.7093   | 331.5736   | -1375.5238  | 7581.4662 |
| 334.3539                | -8.0745     | -46.8719   | 664265.7895 | -5.9079   |
| -5.9394                 |             |            |             |           |
| [76009]ENERGY: 18500000 | 3631.1989   | 5910.0685  | 5939.9101   |           |
| 362.4340                | -15470.9209 | -1850.5084 | 0.0000      | 0.0000    |
| 8990.0975               | 7512.2798   | 335.3737   | -1477.8177  | 7580.8032 |
| 334.1239                | -20.5099    | -46.4704   | 664265.7895 | -6.7993   |
| -6.7822                 |             |            |             |           |
| [76059]ENERGY: 18510000 | 3730.8635   | 5778.5831  | 5909.9582   |           |
| 369.6166                | -15470.1597 | -1807.6378 | 0.0000      | 0.0000    |
| 8997.3670               | 7508.5910   | 335.6448   | -1488.7760  | 7582.4470 |
| 334.1770                | 41.7142     | 11.2919    | 664265.7895 | -4.0131   |
| -4.0281                 |             |            |             |           |
| [76095]ENERGY: 18520000 | 3653.1590   | 5883.4099  | 5831.4009   |           |
| 363.5451                | -15355.0331 | -1911.4382 | 0.0000      | 0.0000    |
| 9042.7250               | 7507.7686   | 337.3369   | -1534.9564  | 7582.6640 |
| 334.2362                | 33.8769     | 45.8410    | 664265.7895 | -6.1622   |
| -6.1570                 |             |            |             |           |
| [76145]ENERGY: 18530000 | 3606.0457   | 6003.9346  | 5847.8000   |           |
| 358.9549                | -15437.6090 | -1838.6741 | 0.0000      | 0.0000    |

## Supplementary Text 6

|                         |             |            |             |           |
|-------------------------|-------------|------------|-------------|-----------|
| 8971.4625               | 7511.9145   | 334.6785   | -1459.5480  | 7582.5739 |
| 334.6306                | 22.7785     | -13.4794   | 664265.7895 | -7.7266   |
| -7.7322                 |             |            |             |           |
| [76181]ENERGY: 18540000 | 3697.8950   | 5903.0565  | 5879.9612   |           |
| 352.4086                | -15425.2586 | -1850.7725 | 0.0000      | 0.0000    |
| 8952.8872               | 7510.1773   | 333.9855   | -1442.7099  | 7582.3410 |
| 334.6314                | -74.4615    | -26.2954   | 664265.7895 | -11.2238  |
| -11.2136                |             |            |             |           |
| [76231]ENERGY: 18550000 | 3703.4707   | 5871.5553  | 5891.6673   |           |
| 352.6647                | -15428.1660 | -1872.5895 | 0.0000      | 0.0000    |
| 8992.6619               | 7511.2645   | 335.4693   | -1481.3973  | 7583.4890 |
| 334.4931                | -88.2459    | -148.4470  | 664265.7895 | -7.3700   |
| -7.3646                 |             |            |             |           |
| [76267]ENERGY: 18560000 | 3679.9375   | 5923.5806  | 5925.3289   |           |
| 364.5565                | -15402.6235 | -1911.1003 | 0.0000      | 0.0000    |
| 8931.1669               | 7510.8465   | 333.1753   | -1420.3204  | 7582.6620 |
| 334.3897                | 46.2426     | 73.2361    | 664265.7895 | -6.0933   |
| -6.1113                 |             |            |             |           |
| [76317]ENERGY: 18570000 | 3705.2993   | 5935.3365  | 5950.3698   |           |
| 364.1436                | -15476.8468 | -1838.2139 | 0.0000      | 0.0000    |
| 8870.9992               | 7511.0877   | 330.9307   | -1359.9115  | 7583.9728 |
| 334.4445                | 22.1123     | -17.1124   | 664265.7895 | -7.5027   |
| -7.4942                 |             |            |             |           |
| [76353]ENERGY: 18580000 | 3659.9169   | 5901.8049  | 5905.3484   |           |
| 377.8323                | -15380.2795 | -1947.5148 | 0.0000      | 0.0000    |
| 8991.3669               | 7508.4751   | 335.4210   | -1482.8917  | 7584.9000 |
| 334.5746                | 18.0323     | -62.4201   | 664265.7895 | -8.9881   |
| -8.9716                 |             |            |             |           |
| [76403]ENERGY: 18590000 | 3676.2619   | 5908.1863  | 5874.5680   |           |
| 358.6047                | -15402.3378 | -1849.6290 | 0.0000      | 0.0000    |
| 8946.6719               | 7512.3260   | 333.7537   | -1434.3459  | 7582.8274 |
| 334.6938                | 235.3060    | 118.6703   | 664265.7895 | -8.4578   |
| -8.4879                 |             |            |             |           |
| [76442]ENERGY: 18600000 | 3683.4268   | 5815.9188  | 5953.4701   |           |
| 354.2432                | -15457.5147 | -1810.7384 | 0.0000      | 0.0000    |
| 8976.2926               | 7515.0984   | 334.8587   | -1461.1942  | 7583.5371 |
| 334.6835                | 6.1009      | 28.8051    | 664265.7895 | -12.6065  |
| -12.5732                |             |            |             |           |
| [76492]ENERGY: 18610000 | 3617.9686   | 5927.2288  | 5982.7869   |           |
| 351.0069                | -15393.8818 | -1925.1977 | 0.0000      | 0.0000    |
| 8949.2960               | 7509.2075   | 333.8516   | -1440.0884  | 7583.9726 |
| 334.4865                | -31.3299    | -15.4280   | 664265.7895 | -10.1486  |
| -10.1688                |             |            |             |           |
| [76528]ENERGY: 18620000 | 3661.1408   | 5913.1658  | 5977.2833   |           |
| 346.2692                | -15449.8374 | -1835.4904 | 0.0000      | 0.0000    |
| 8900.9580               | 7513.4893   | 332.0483   | -1387.4687  | 7582.8884 |
| 334.6502                | 151.2468    | 110.8957   | 664265.7895 | -3.9472   |
| -3.9485                 |             |            |             |           |
| [76578]ENERGY: 18630000 | 3632.3394   | 5871.4774  | 5924.0826   |           |
| 359.8570                | -15309.5753 | -1914.2364 | 0.0000      | 0.0000    |
| 8948.2326               | 7512.1773   | 333.8119   | -1436.0553  | 7583.1971 |
| 334.6034                | -49.0794    | -17.4197   | 664265.7895 | -10.2519  |
| -10.2511                |             |            |             |           |
| [76614]ENERGY: 18640000 | 3737.5371   | 5846.8573  | 5955.2723   |           |

## Supplementary Text 6

|                         |             |            |             |           |
|-------------------------|-------------|------------|-------------|-----------|
| 370.1412                | -15408.8074 | -1952.8779 | 0.0000      | 0.0000    |
| 8964.1936               | 7512.3162   | 334.4073   | -1451.8774  | 7583.6773 |
| 334.5303                | 17.7223     | -82.5436   | 664265.7895 | -4.7236   |
| -4.7343                 |             |            |             |           |
| [76664]ENERGY: 18650000 | 3734.0397   | 5890.7319  | 5864.3562   |           |
| 371.4014                | -15411.5512 | -1881.2270 | 0.0000      | 0.0000    |
| 8942.8311               | 7510.5821   | 333.6104   | -1432.2491  | 7584.3219 |
| 334.3974                | -4.3962     | -12.5516   | 664265.7895 | -10.1446  |
| -10.1403                |             |            |             |           |
| [76700]ENERGY: 18660000 | 3747.2154   | 5832.4851  | 5906.6519   |           |
| 359.9790                | -15419.0209 | -1821.7531 | 0.0000      | 0.0000    |
| 8907.0669               | 7512.6242   | 332.2762   | -1394.4427  | 7584.1632 |
| 334.4050                | -129.7582   | 13.4451    | 664265.7895 | -8.1067   |
| -8.1033                 |             |            |             |           |
| [76750]ENERGY: 18670000 | 3718.7652   | 5841.9361  | 5974.4115   |           |
| 364.4294                | -15393.6060 | -1911.1119 | 0.0000      | 0.0000    |
| 8916.6477               | 7511.4721   | 332.6336   | -1405.1757  | 7583.4744 |
| 334.3010                | -53.5239    | -55.8477   | 664265.7895 | -6.5633   |
| -6.5611                 |             |            |             |           |
| [76786]ENERGY: 18680000 | 3603.9953   | 5982.7711  | 5857.9076   |           |
| 335.9257                | -15323.3362 | -1877.4223 | 0.0000      | 0.0000    |
| 8935.8508               | 7515.6921   | 333.3500   | -1420.1587  | 7585.2272 |
| 334.2922                | 86.8520     | 49.1398    | 664265.7895 | -7.5776   |
| -7.5809                 |             |            |             |           |
| [76836]ENERGY: 18690000 | 3617.4956   | 5918.7975  | 5918.3802   |           |
| 363.5677                | -15490.0721 | -1857.5125 | 0.0000      | 0.0000    |
| 9037.9075               | 7508.5639   | 337.1572   | -1529.3436  | 7584.4860 |
| 334.4575                | 45.1489     | 43.5291    | 664265.7895 | -7.3929   |
| -7.3786                 |             |            |             |           |
| [76875]ENERGY: 18700000 | 3624.7738   | 5890.1335  | 5938.4136   |           |
| 357.0688                | -15445.4151 | -1845.8048 | 0.0000      | 0.0000    |
| 8991.7650               | 7510.9348   | 335.4359   | -1480.8302  | 7585.8651 |
| 334.5195                | 10.3057     | -19.5878   | 664265.7895 | -9.3334   |
| -9.3373                 |             |            |             |           |
| [76925]ENERGY: 18710000 | 3705.8871   | 5931.6152  | 5950.7045   |           |
| 369.1690                | -15495.5818 | -1882.8375 | 0.0000      | 0.0000    |
| 8936.8026               | 7515.7591   | 333.3855   | -1421.0435  | 7585.4012 |
| 334.4641                | 23.4884     | -52.5231   | 664265.7895 | -10.1936  |
| -10.2037                |             |            |             |           |
| [76961]ENERGY: 18720000 | 3648.8860   | 6014.6874  | 5898.8598   |           |
| 368.8614                | -15446.9747 | -1886.6969 | 0.0000      | 0.0000    |
| 8915.1262               | 7512.7492   | 332.5769   | -1402.3770  | 7585.2269 |
| 334.5364                | 59.7741     | 29.5619    | 664265.7895 | -11.9624  |
| -11.9496                |             |            |             |           |
| [77011]ENERGY: 18730000 | 3609.7540   | 5957.4131  | 5940.1419   |           |
| 382.0410                | -15419.5671 | -1888.0934 | 0.0000      | 0.0000    |
| 8930.3721               | 7512.0616   | 333.1456   | -1418.3106  | 7583.7508 |
| 334.4650                | -13.8704    | 28.8382    | 664265.7895 | -7.2625   |
| -7.2608                 |             |            |             |           |
| [77047]ENERGY: 18740000 | 3643.3813   | 5941.0501  | 5962.0883   |           |
| 352.0071                | -15393.6643 | -1877.1423 | 0.0000      | 0.0000    |
| 8885.2827               | 7513.0029   | 331.4636   | -1372.2798  | 7583.3173 |
| 334.3587                | 44.8039     | 47.7849    | 664265.7895 | -7.4804   |
| -7.4818                 |             |            |             |           |

## Supplementary Text 6

|                         |             |            |             |
|-------------------------|-------------|------------|-------------|
| [77097]ENERGY: 18750000 | 3644.8780   | 5898.7734  | 5882.1104   |
| 338.1492                | -15435.2574 | -1871.2678 | 0.0000      |
| 9055.5165               | 7512.9024   | 337.8141   | -1542.6142  |
| 334.5909                | 35.0159     | 46.5440    | 664265.7895 |
| -5.2621                 |             |            | -5.2594     |
| [77133]ENERGY: 18760000 | 3680.5402   | 5826.5195  | 5899.1284   |
| 349.2623                | -15319.8544 | -1936.1238 | 0.0000      |
| 9012.7235               | 7512.1957   | 336.2177   | -1500.5277  |
| 334.6917                | -95.0498    | -59.3234   | 664265.7895 |
| -9.6327                 |             |            | -9.6276     |
| [77183]ENERGY: 18770000 | 3626.1435   | 5967.7900  | 5972.8206   |
| 387.0623                | -15479.7805 | -1846.7954 | 0.0000      |
| 8889.1879               | 7516.4284   | 331.6092   | -1372.7595  |
| 334.6863                | 128.6071    | 133.1306   | 664265.7895 |
| -6.8953                 |             |            | -6.8993     |
| [77219]ENERGY: 18780000 | 3637.2849   | 5857.3053  | 5920.3867   |
| 391.7212                | -15447.5999 | -1856.1301 | 0.0000      |
| 9010.1814               | 7513.1495   | 336.1229   | -1497.0319  |
| 334.7069                | -17.5739    | -22.1745   | 664265.7895 |
| -6.3304                 |             |            | -6.3341     |
| [77269]ENERGY: 18790000 | 3647.1385   | 5881.3700  | 5923.9940   |
| 360.9865                | -15445.0159 | -1838.3020 | 0.0000      |
| 8983.2505               | 7513.4215   | 335.1182   | -1469.8290  |
| 334.6182                | -51.7871    | -43.1753   | 664265.7895 |
| -6.1200                 |             |            | -6.1066     |
| [77308]ENERGY: 18800000 | 3651.8059   | 5874.8262  | 5958.3740   |
| 336.4198                | -15333.9253 | -1937.6649 | 0.0000      |
| 8966.6552               | 7516.4909   | 334.4991   | -1450.1643  |
| 334.6802                | -15.2933    | -79.8219   | 664265.7895 |
| -3.8143                 |             |            | -3.8272     |
| [77358]ENERGY: 18810000 | 3776.0912   | 5766.3662  | 5952.0006   |
| 345.2388                | -15324.4675 | -1947.4522 | 0.0000      |
| 8949.2422               | 7517.0194   | 333.8496   | -1432.2229  |
| 334.6073                | -60.3666    | -109.0145  | 664265.7895 |
| -6.0932                 |             |            | -6.0977     |
| [77394]ENERGY: 18820000 | 3627.4881   | 5878.4249  | 5916.6609   |
| 355.7284                | -15398.8171 | -1924.3856 | 0.0000      |
| 9061.1660               | 7516.2656   | 338.0248   | -1544.9004  |
| 334.6947                | -34.1123    | -173.1244  | 664265.7895 |
| -6.5658                 |             |            | -6.5255     |
| [77444]ENERGY: 18830000 | 3737.2392   | 5961.2018  | 5942.5322   |
| 349.4696                | -15504.2454 | -1842.2625 | 0.0000      |
| 8876.3310               | 7520.2660   | 331.1296   | -1356.0650  |
| 334.9001                | 43.1883     | 151.1841   | 664265.7895 |
| -2.8012                 |             |            | -2.8340     |
| [77480]ENERGY: 18840000 | 3689.5339   | 5897.1820  | 5909.2261   |
| 383.8705                | -15306.9295 | -1938.2481 | 0.0000      |
| 8889.5144               | 7524.1493   | 331.6214   | -1365.3651  |
| 334.6887                | 251.3782    | 115.0469   | 664265.7895 |
| -6.3341                 |             |            | -6.3209     |
| [77530]ENERGY: 18850000 | 3741.8260   | 5907.3449  | 5948.0591   |
| 342.4624                | -15443.6609 | -1933.8607 | 0.0000      |
| 8955.8001               | 7517.9708   | 334.0942   | -1437.8292  |
| 334.7613                | -59.9588    | -138.0752  | 664265.7895 |
|                         |             |            | -3.9006     |



## Supplementary Text 6

-3.9113

|                         |             |            |             |
|-------------------------|-------------|------------|-------------|
| [77566]ENERGY: 18860000 | 3627.3396   | 5905.7439  | 5912.6198   |
| 367.6933                | -15491.7771 | -1815.6834 | 0.0000      |
| 9003.0885               | 7509.0245   | 335.8583   | -1494.0640  |
| 334.8229                | -24.3384    | -34.6436   | 664265.7895 |
| -0.4518                 |             |            | -0.4629     |

|                         |             |            |             |
|-------------------------|-------------|------------|-------------|
| [77616]ENERGY: 18870000 | 3626.0480   | 5926.7352  | 5939.2736   |
| 375.3363                | -15437.8999 | -1841.0073 | 0.0000      |
| 8927.1239               | 7515.6097   | 333.0244   | -1411.5142  |
| 334.6872                | 121.5459    | 8.8198     | 664265.7895 |
| -4.8097                 |             |            | -4.8125     |

|                         |             |            |             |
|-------------------------|-------------|------------|-------------|
| [77652]ENERGY: 18880000 | 3660.6016   | 5951.9481  | 5860.7869   |
| 353.4555                | -15474.9347 | -1801.9965 | 0.0000      |
| 8964.8814               | 7514.7421   | 334.4330   | -1450.1393  |
| 334.5808                | 130.4816    | 128.0070   | 664265.7895 |
| -5.8022                 |             |            | -5.8027     |

|                         |             |            |             |
|-------------------------|-------------|------------|-------------|
| [77702]ENERGY: 18890000 | 3734.7150   | 5959.8606  | 5922.7116   |
| 357.6206                | -15448.0019 | -1888.8265 | 0.0000      |
| 8880.5042               | 7518.5836   | 331.2853   | -1361.9206  |
| 334.4619                | 51.5663     | 28.0286    | 664265.7895 |
| -7.9229                 |             |            | -7.9386     |

|                         |             |            |             |
|-------------------------|-------------|------------|-------------|
| [77741]ENERGY: 18900000 | 3672.9735   | 5853.7093  | 5944.9467   |
| 354.4087                | -15394.2465 | -1926.0499 | 0.0000      |
| 9015.2825               | 7521.0244   | 336.3132   | -1494.2582  |
| 334.5609                | -106.8197   | -6.4404    | 664265.7895 |
| -8.3056                 |             |            | -8.3051     |

|                         |             |            |             |
|-------------------------|-------------|------------|-------------|
| [77791]ENERGY: 18910000 | 3640.1956   | 5957.1104  | 5883.1530   |
| 351.9550                | -15486.1641 | -1873.6414 | 0.0000      |
| 9043.3920               | 7516.0005   | 337.3618   | -1527.3915  |
| 334.6231                | 91.6804     | 10.0754    | 664265.7895 |
| -9.3067                 |             |            | -9.2988     |

|                         |             |            |             |
|-------------------------|-------------|------------|-------------|
| [77827]ENERGY: 18920000 | 3666.8933   | 5823.7950  | 5888.3901   |
| 400.7614                | -15358.4291 | -1906.0241 | 0.0000      |
| 9002.2742               | 7517.6608   | 335.8279   | -1484.6133  |
| 334.6397                | -136.4018   | -30.5157   | 664265.7895 |
| -7.5460                 |             |            | -7.5506     |

|                         |             |            |             |
|-------------------------|-------------|------------|-------------|
| [77877]ENERGY: 18930000 | 3661.6387   | 5958.7786  | 5942.7523   |
| 351.6778                | -15550.7068 | -1820.5342 | 0.0000      |
| 8974.6309               | 7518.2373   | 334.7967   | -1456.3936  |
| 334.8819                | 61.4221     | 61.1113    | 664265.7895 |
| -6.4701                 |             |            | -6.4625     |

|                         |             |            |             |
|-------------------------|-------------|------------|-------------|
| [77913]ENERGY: 18940000 | 3683.2105   | 5922.9703  | 5915.9205   |
| 360.4057                | -15377.7614 | -1960.5368 | 0.0000      |
| 8975.1769               | 7519.3855   | 334.8170   | -1455.7913  |
| 334.6411                | -149.2106   | -174.1396  | 664265.7895 |
| -7.6475                 |             |            | -7.6537     |

|                         |             |            |             |
|-------------------------|-------------|------------|-------------|
| [77963]ENERGY: 18950000 | 3710.2044   | 5889.7555  | 5904.7491   |
| 390.3181                | -15433.6001 | -1830.9958 | 0.0000      |
| 8887.0857               | 7517.5169   | 331.5308   | -1369.5688  |
| 334.5077                | 47.7631     | 82.4989    | 664265.7895 |
| -7.4423                 |             |            | -7.4386     |

|                         |             |            |            |
|-------------------------|-------------|------------|------------|
| [77999]ENERGY: 18960000 | 3608.1092   | 5957.6064  | 5866.2483  |
| 375.9028                | -15387.4496 | -1880.1500 | 0.0000     |
| 8978.8224               | 7519.0895   | 334.9530   | -1459.7328 |
|                         |             |            | 7591.7514  |

## Supplementary Text 6

|                         |             |            |             |           |
|-------------------------|-------------|------------|-------------|-----------|
| 334.7890                | 14.8747     | -74.1098   | 664265.7895 | -7.4680   |
| -7.4814                 |             |            |             |           |
| [78049]ENERGY: 18970000 | 3651.6382   | 5925.3547  | 5935.1052   |           |
| 347.3201                | -15431.1903 | -1863.6486 | 0.0000      | 0.0000    |
| 8952.9300               | 7517.5093   | 333.9871   | -1435.4207  | 7591.9627 |
| 334.8586                | -25.4872    | -56.3483   | 664265.7895 | -9.7577   |
| -9.7257                 |             |            |             |           |
| [78085]ENERGY: 18980000 | 3710.5548   | 5946.8041  | 5925.3122   |           |
| 367.8674                | -15509.1124 | -1918.5288 | 0.0000      | 0.0000    |
| 8996.7718               | 7519.6691   | 335.6226   | -1477.1027  | 7593.0458 |
| 334.8568                | 24.3818     | -25.0716   | 664265.7895 | -6.7362   |
| -6.7721                 |             |            |             |           |
| [78135]ENERGY: 18990000 | 3672.7993   | 5850.0900  | 5920.9153   |           |
| 387.0086                | -15290.2428 | -1963.0678 | 0.0000      | 0.0000    |
| 8942.3887               | 7519.8913   | 333.5939   | -1422.4974  | 7593.0188 |
| 334.6725                | -101.7812   | -150.6632  | 664265.7895 | -8.7283   |
| -8.7204                 |             |            |             |           |
| [78174]ENERGY: 19000000 | 3632.6170   | 5895.8338  | 5910.3329   |           |
| 359.2858                | -15505.9165 | -1759.7490 | 0.0000      | 0.0000    |
| 8986.8813               | 7519.2854   | 335.2537   | -1467.5960  | 7593.9414 |
| 334.7018                | -22.5958    | 8.1846     | 664265.7895 | -8.2373   |
| -8.2262                 |             |            |             |           |
| [78224]ENERGY: 19010000 | 3650.6226   | 5877.0817  | 5859.7641   |           |
| 361.0764                | -15375.7433 | -1874.2963 | 0.0000      | 0.0000    |
| 9025.5733               | 7524.0785   | 336.6971   | -1501.4948  | 7596.3420 |
| 334.8403                | -22.7338    | -54.9468   | 664265.7895 | -6.4197   |
| -6.4333                 |             |            |             |           |
| [78260]ENERGY: 19020000 | 3655.4529   | 5971.6728  | 5925.0541   |           |
| 362.1666                | -15412.7107 | -1875.4307 | 0.0000      | 0.0000    |
| 8896.8302               | 7523.0352   | 331.8943   | -1373.7950  | 7596.2802 |
| 334.9688                | 27.2526     | 71.9608    | 664265.7895 | -5.8419   |
| -5.8168                 |             |            |             |           |
| [78310]ENERGY: 19030000 | 3623.5920   | 5981.0207  | 5960.8523   |           |
| 347.4076                | -15379.9681 | -1915.6036 | 0.0000      | 0.0000    |
| 8909.3438               | 7526.6446   | 332.3612   | -1382.6992  | 7597.7793 |
| 334.9219                | -180.6013   | -98.6154   | 664265.7895 | -4.2086   |
| -4.2108                 |             |            |             |           |
| [78346]ENERGY: 19040000 | 3544.4697   | 5971.9049  | 5957.3541   |           |
| 382.7553                | -15435.9040 | -1876.2242 | 0.0000      | 0.0000    |
| 8977.6540               | 7522.0097   | 334.9094   | -1455.6443  | 7597.1923 |
| 334.7662                | -36.7589    | 30.9970    | 664265.7895 | -9.0430   |
| -9.0404                 |             |            |             |           |
| [78396]ENERGY: 19050000 | 3593.0909   | 5928.7272  | 5937.1732   |           |
| 339.2933                | -15411.8113 | -1897.7790 | 0.0000      | 0.0000    |
| 9037.2187               | 7525.9131   | 337.1315   | -1511.3057  | 7597.6288 |
| 334.8424                | 178.3161    | 161.7921   | 664265.7895 | -6.1644   |
| -6.1924                 |             |            |             |           |
| [78432]ENERGY: 19060000 | 3599.8885   | 5901.4854  | 5949.6517   |           |
| 362.7526                | -15308.0452 | -1903.4064 | 0.0000      | 0.0000    |
| 8924.2705               | 7526.5972   | 332.9180   | -1397.6733  | 7597.3406 |
| 334.9038                | -122.2220   | -101.6943  | 664265.7895 | -8.6008   |
| -8.5963                 |             |            |             |           |
| [78482]ENERGY: 19070000 | 3656.3222   | 5936.0039  | 5886.1011   |           |
| 378.6322                | -15365.8528 | -1904.6035 | 0.0000      | 0.0000    |

## Supplementary Text 6

|                         |             |            |             |           |
|-------------------------|-------------|------------|-------------|-----------|
| 8941.6516               | 7528.2547   | 333.5664   | -1413.3969  | 7599.0841 |
| 334.8906                | -74.5783    | -103.3770  | 664265.7895 | -7.9910   |
| -7.9776                 |             |            |             |           |
| [78518]ENERGY: 19080000 | 3664.2613   | 5827.8975  | 5906.7733   |           |
| 328.6587                | -15385.3902 | -1830.2235 | 0.0000      | 0.0000    |
| 9013.4459               | 7525.4231   | 336.2447   | -1488.0228  | 7598.5177 |
| 334.9588                | 165.0184    | 75.0059    | 664265.7895 | -7.8637   |
| -7.8666                 |             |            |             |           |
| [78568]ENERGY: 19090000 | 3784.1322   | 5937.1680  | 5938.9886   |           |
| 365.0144                | -15448.3206 | -1920.0827 | 0.0000      | 0.0000    |
| 8869.9022               | 7526.8021   | 330.8898   | -1343.1001  | 7597.7788 |
| 334.5131                | 27.3270     | -3.2503    | 664265.7895 | -9.0126   |
| -9.0234                 |             |            |             |           |
| [78607]ENERGY: 19100000 | 3683.2206   | 5922.7453  | 5893.4718   |           |
| 360.1409                | -15408.1318 | -1877.5697 | 0.0000      | 0.0000    |
| 8953.0876               | 7526.9646   | 333.9930   | -1426.1230  | 7596.8013 |
| 334.8230                | -71.7566    | -78.9422   | 664265.7895 | -9.7711   |
| -9.7551                 |             |            |             |           |
| [78657]ENERGY: 19110000 | 3634.3052   | 5881.9284  | 5973.9402   |           |
| 347.7513                | -15462.2766 | -1847.7976 | 0.0000      | 0.0000    |
| 8995.7907               | 7523.6416   | 335.5860   | -1472.1491  | 7596.3807 |
| 334.9064                | 13.0272     | 120.0838   | 664265.7895 | -11.1996  |
| -11.1737                |             |            |             |           |
| [78693]ENERGY: 19120000 | 3725.5624   | 5882.3490  | 5869.1506   |           |
| 349.6029                | -15506.2132 | -1799.6731 | 0.0000      | 0.0000    |
| 8999.5222               | 7520.3008   | 335.7252   | -1479.2213  | 7596.5630 |
| 334.7021                | 39.6863     | -5.0767    | 664265.7895 | -9.5553   |
| -9.5946                 |             |            |             |           |
| [78743]ENERGY: 19130000 | 3679.1127   | 5897.0447  | 5934.5063   |           |
| 369.4193                | -15397.5937 | -1879.3971 | 0.0000      | 0.0000    |
| 8923.3605               | 7526.4527   | 332.8840   | -1396.9077  | 7596.0964 |
| 334.7245                | 59.6588     | 44.5242    | 664265.7895 | -5.0018   |
| -5.0091                 |             |            |             |           |
| [78779]ENERGY: 19140000 | 3710.2968   | 5916.5048  | 5951.0842   |           |
| 340.6173                | -15459.3946 | -1940.7787 | 0.0000      | 0.0000    |
| 9001.4822               | 7519.8120   | 335.7984   | -1481.6702  | 7595.0803 |
| 334.9701                | 78.3310     | 14.4733    | 664265.7895 | -11.7336  |
| -11.7038                |             |            |             |           |
| [78829]ENERGY: 19150000 | 3601.6648   | 6000.7992  | 5927.9895   |           |
| 365.5792                | -15459.4866 | -1926.7047 | 0.0000      | 0.0000    |
| 9016.8038               | 7526.6452   | 336.3699   | -1490.1587  | 7598.5142 |
| 334.8922                | 171.8610    | 54.1206    | 664265.7895 | -11.1291  |
| -11.1491                |             |            |             |           |
| [78865]ENERGY: 19160000 | 3650.9517   | 5869.6592  | 5919.4344   |           |
| 370.2620                | -15322.8948 | -1924.5243 | 0.0000      | 0.0000    |
| 8966.5954               | 7529.4835   | 334.4969   | -1437.1119  | 7598.9513 |
| 334.6669                | -4.7887     | -46.3201   | 664265.7895 | -9.7286   |
| -9.7299                 |             |            |             |           |
| [78915]ENERGY: 19170000 | 3595.8145   | 5905.1702  | 5890.1699   |           |
| 355.9889                | -15424.8233 | -1844.7647 | 0.0000      | 0.0000    |
| 9045.7100               | 7523.2655   | 337.4483   | -1522.4445  | 7597.2890 |
| 334.8401                | 146.5785    | -75.7889   | 664265.7895 | -10.5048  |
| -10.5114                |             |            |             |           |
| [78951]ENERGY: 19180000 | 3692.3392   | 5982.6006  | 5935.2002   |           |

## Supplementary Text 6

|                         |             |            |             |           |
|-------------------------|-------------|------------|-------------|-----------|
| 358.1677                | -15549.6697 | -1787.1552 | 0.0000      | 0.0000    |
| 8893.5435               | 7525.0263   | 331.7717   | -1368.5172  | 7597.2510 |
| 334.7983                | -98.8178    | -15.8037   | 664265.7895 | -9.2642   |
| -9.2586                 |             |            |             |           |
| [79001]ENERGY: 19190000 | 3644.9202   | 5849.2806  | 5921.1220   |           |
| 359.9909                | -15372.1797 | -1922.7529 | 0.0000      | 0.0000    |
| 9045.4568               | 7525.8381   | 337.4388   | -1519.6187  | 7597.7948 |
| 335.0385                | -73.0902    | -85.6369   | 664265.7895 | -7.2894   |
| -7.2801                 |             |            |             |           |
| [79040]ENERGY: 19200000 | 3682.4529   | 5898.9013  | 5901.3642   |           |
| 359.2912                | -15445.5590 | -1864.0269 | 0.0000      | 0.0000    |
| 8993.1594               | 7525.5832   | 335.4879   | -1467.5762  | 7598.6888 |
| 334.7120                | -115.7498   | -85.9858   | 664265.7895 | -7.7824   |
| -7.7723                 |             |            |             |           |
| [79090]ENERGY: 19210000 | 3594.7387   | 5931.7935  | 5880.5119   |           |
| 351.0152                | -15453.9642 | -1834.0065 | 0.0000      | 0.0000    |
| 9052.2041               | 7522.2926   | 337.6905   | -1529.9115  | 7596.7220 |
| 334.9805                | 136.3883    | 46.8755    | 664265.7895 | -8.3756   |
| -8.4149                 |             |            |             |           |
| [79126]ENERGY: 19220000 | 3570.3355   | 5891.9432  | 5898.4217   |           |
| 367.1969                | -15412.9732 | -1780.1591 | 0.0000      | 0.0000    |
| 8990.4318               | 7525.1967   | 335.3861   | -1465.2351  | 7596.5075 |
| 334.9072                | 88.1229     | 99.9397    | 664265.7895 | -10.0923  |
| -10.0652                |             |            |             |           |
| [79176]ENERGY: 19230000 | 3731.3105   | 5939.1541  | 5961.2523   |           |
| 379.5083                | -15463.4200 | -1913.3049 | 0.0000      | 0.0000    |
| 8891.5326               | 7526.0328   | 331.6967   | -1365.4998  | 7596.6726 |
| 334.9699                | -142.5089   | -119.0465  | 664265.7895 | -7.7193   |
| -7.7127                 |             |            |             |           |
| [79212]ENERGY: 19240000 | 3573.8118   | 5917.9204  | 5884.1412   |           |
| 353.4706                | -15326.2549 | -1841.0312 | 0.0000      | 0.0000    |
| 8962.8790               | 7524.9368   | 334.3583   | -1437.9422  | 7596.3948 |
| 334.7776                | -50.2356    | 16.6142    | 664265.7895 | -9.3919   |
| -9.4167                 |             |            |             |           |
| [79262]ENERGY: 19250000 | 3606.8092   | 5928.4749  | 5911.0711   |           |
| 369.6342                | -15367.6262 | -1906.2416 | 0.0000      | 0.0000    |
| 8985.7530               | 7527.8745   | 335.2116   | -1457.8785  | 7598.6656 |
| 334.8918                | 150.8017    | -12.8990   | 664265.7895 | -14.9163  |
| -14.9050                |             |            |             |           |
| [79298]ENERGY: 19260000 | 3697.3645   | 6037.4380  | 5922.9221   |           |
| 401.8327                | -15571.6186 | -1858.6254 | 0.0000      | 0.0000    |
| 8899.1184               | 7528.4317   | 331.9797   | -1370.6867  | 7597.1050 |
| 334.8473                | -86.7929    | -97.8092   | 664265.7895 | -10.4726  |
| -10.4618                |             |            |             |           |
| [79348]ENERGY: 19270000 | 3602.3323   | 5939.1030  | 5914.8259   |           |
| 348.1281                | -15429.5351 | -1845.5462 | 0.0000      | 0.0000    |
| 8997.9040               | 7527.2122   | 335.6649   | -1470.6919  | 7599.3383 |
| 334.9074                | 143.0822    | 40.8093    | 664265.7895 | -4.5129   |
| -4.5022                 |             |            |             |           |
| [79384]ENERGY: 19280000 | 3726.0799   | 5924.9805  | 5906.5047   |           |
| 365.7838                | -15467.1372 | -1846.7548 | 0.0000      | 0.0000    |
| 8919.8467               | 7529.3037   | 332.7530   | -1390.5430  | 7598.1597 |
| 335.0245                | 105.9046    | 84.9854    | 664265.7895 | -7.0429   |
| -7.0567                 |             |            |             |           |

## Supplementary Text 6

|                         |             |            |             |
|-------------------------|-------------|------------|-------------|
| [79434]ENERGY: 19290000 | 3776.1310   | 5806.9834  | 5948.0974   |
| 366.1452                | -15444.6382 | -1834.7650 | 0.0000      |
| 8910.7978               | 7528.7516   | 332.4154   | -1382.0462  |
| 334.6864                | 41.0023     | 66.3738    | 664265.7895 |
| -11.6809                |             |            | -11.6754    |
| [79473]ENERGY: 19300000 | 3748.5656   | 5878.7459  | 5895.0455   |
| 387.6582                | -15416.1274 | -1938.8691 | 0.0000      |
| 8972.1141               | 7527.1327   | 334.7028   | -1444.9814  |
| 334.7355                | 40.9993     | -28.1642   | 664265.7895 |
| -7.4586                 |             |            | -7.4517     |
| [79523]ENERGY: 19310000 | 3709.8632   | 5900.3818  | 5904.8782   |
| 359.8910                | -15508.2877 | -1860.5436 | 0.0000      |
| 9015.1645               | 7521.3476   | 336.3088   | -1493.8170  |
| 334.7525                | -201.2923   | -92.5396   | 664265.7895 |
| -5.6458                 |             |            | -5.6636     |
| [79559]ENERGY: 19320000 | 3624.0290   | 5931.9031  | 5888.5407   |
| 353.4863                | -15401.0732 | -1876.3059 | 0.0000      |
| 9005.7619               | 7526.3419   | 335.9580   | -1479.4200  |
| 334.8428                | 48.3397     | 56.2937    | 664265.7895 |
| -7.9336                 |             |            | -7.9128     |
| [79609]ENERGY: 19330000 | 3661.6130   | 5988.0434  | 5925.1635   |
| 369.5150                | -15399.4762 | -1896.6614 | 0.0000      |
| 8881.1080               | 7529.3054   | 331.3078   | -1351.8026  |
| 335.0288                | -136.0662   | -103.4901  | 664265.7895 |
| -7.1111                 |             |            | -7.1122     |
| [79645]ENERGY: 19340000 | 3727.1620   | 5945.5036  | 5874.2524   |
| 347.9457                | -15402.5185 | -1897.5315 | 0.0000      |
| 8940.2656               | 7535.0793   | 333.5147   | -1405.1863  |
| 335.2322                | -49.5177    | -62.5349   | 664265.7895 |
| -8.4521                 |             |            | -8.4665     |
| [79695]ENERGY: 19350000 | 3761.9833   | 5884.9011  | 5896.1924   |
| 361.1685                | -15488.9261 | -1816.0148 | 0.0000      |
| 8931.4260               | 7530.7303   | 333.1849   | -1400.6957  |
| 335.0361                | -129.3902   | -114.9747  | 664265.7895 |
| -5.8690                 |             |            | -5.8676     |
| [79731]ENERGY: 19360000 | 3656.9623   | 6038.6639  | 5871.9846   |
| 368.3876                | -15456.4778 | -1893.7242 | 0.0000      |
| 8944.5148               | 7530.3112   | 333.6732   | -1414.2036  |
| 335.1140                | 28.4433     | -26.8885   | 664265.7895 |
| -7.4905                 |             |            | -7.4961     |
| [79781]ENERGY: 19370000 | 3724.1629   | 5842.5579  | 5928.0017   |
| 361.0097                | -15328.7688 | -1881.5791 | 0.0000      |
| 8891.0568               | 7536.4411   | 331.6790   | -1354.6157  |
| 334.9852                | -89.1014    | -113.4675  | 664265.7895 |
| -12.4808                |             |            | -12.4749    |
| [79817]ENERGY: 19380000 | 3707.0135   | 6065.6357  | 5892.7722   |
| 360.3519                | -15549.3430 | -1837.0099 | 0.0000      |
| 8888.0756               | 7527.4960   | 331.5677   | -1360.5796  |
| 334.8823                | 69.3545     | 66.7070    | 664265.7895 |
| -13.7343                |             |            | -13.7361    |
| [79867]ENERGY: 19390000 | 3676.7823   | 5875.8485  | 5899.6220   |
| 372.0597                | -15421.7072 | -1892.8360 | 0.0000      |
| 9017.5266               | 7527.2961   | 336.3969   | -1490.2305  |
| 335.1302                | 90.6146     | 162.7137   | 664265.7895 |
|                         |             |            | -9.3255     |

Supplementary Text 6

-9.3031  
 [79906]ENERGY: 19400000 3633.8232 6005.6604 5935.5722  
 358.9275 -15449.2368 -1904.9270 0.0000 0.0000  
 8950.5505 7530.3700 333.8984 -1420.1805 7604.8913  
 335.0868 -74.2800 -35.4427 664265.7895 -9.4504  
 -9.4655  
 [79956]ENERGY: 19410000 3667.5690 5954.8939 5945.0830  
 354.7303 -15433.4287 -1873.1627 0.0000 0.0000  
 8917.2447 7532.9296 332.6559 -1384.3151 7605.7377  
 334.8955 -60.5617 -71.3963 664265.7895 -8.5713  
 -8.5739  
 [79992]ENERGY: 19420000 3728.7063 5909.4183 5935.4354  
 345.3112 -15571.4398 -1788.5181 0.0000 0.0000  
 8973.0981 7532.0114 334.7395 -1441.0867 7604.1378  
 335.0337 -3.7367 45.8130 664265.7895 -8.2185  
 -8.2256  
 [80042]ENERGY: 19430000 3641.3268 6011.0675 5896.5114  
 339.6332 -15449.2812 -1899.7065 0.0000 0.0000  
 8994.8372 7534.3885 335.5505 -1460.4487 7606.3144  
 334.8915 15.7814 76.5068 664265.7895 -10.2973  
 -10.3025  
 [80078]ENERGY: 19440000 3679.9900 5846.8801 5847.2092  
 337.5161 -15417.0367 -1840.5689 0.0000 0.0000  
 9076.9121 7530.9019 338.6123 -1546.0102 7605.5653  
 334.8626 -27.3258 -96.0049 664265.7895 -8.9352  
 -8.9331  
 [80128]ENERGY: 19450000 3706.1073 5961.9217 5854.2165  
 355.6870 -15530.8544 -1843.4176 0.0000 0.0000  
 9027.1785 7530.8390 336.7569 -1496.3395 7605.6025  
 334.9908 -49.1992 53.9636 664265.7895 -8.8589  
 -8.8615  
 [80164]ENERGY: 19460000 3548.2646 5907.5163 5920.3484  
 352.4340 -15383.0945 -1839.2598 0.0000 0.0000  
 9027.2681 7533.4770 336.7603 -1493.7910 7607.1512  
 335.0670 49.2101 110.5970 664265.7895 -8.0430  
 -8.0393  
 [80214]ENERGY: 19470000 3606.6174 5906.6161 5911.0073  
 369.9435 -15304.5473 -1897.0704 0.0000 0.0000  
 8943.2313 7535.7980 333.6253 -1407.4333 7606.1299  
 335.0629 21.6756 -15.2425 664265.7895 -6.5099  
 -6.5000  
 [80250]ENERGY: 19480000 3684.3978 5918.1793 5891.8020  
 355.7886 -15390.5412 -1849.3149 0.0000 0.0000  
 8924.1453 7534.4568 332.9133 -1389.6885 7607.9536  
 335.0973 117.4060 58.1629 664265.7895 -6.4213  
 -6.4124  
 [80300]ENERGY: 19490000 3613.9842 6031.3666 5846.3536  
 346.0330 -15304.7068 -1927.1974 0.0000 0.0000  
 8930.3158 7536.1491 333.1435 -1394.1667 7606.8380  
 334.8957 -1.2463 0.9869 664265.7895 -6.6665  
 -6.6882  
 [80339]ENERGY: 19500000 3620.9855 5946.3447 5888.7613  
 385.6034 -15387.8810 -1846.3504 0.0000 0.0000  
 8929.4451 7536.9085 333.1110 -1392.5366 7608.4205

## Supplementary Text 6

|                         |             |            |             |           |
|-------------------------|-------------|------------|-------------|-----------|
| 334.9493                | 74.5793     | 7.1173     | 664265.7895 | -8.3697   |
| -8.3773                 |             |            |             |           |
| [80389]ENERGY: 19510000 | 3681.6714   | 5974.4403  | 5917.8310   |           |
| 356.0930                | -15591.5901 | -1789.7245 | 0.0000      | 0.0000    |
| 8986.0599               | 7534.7809   | 335.2230   | -1451.2789  | 7607.3929 |
| 334.8607                | -16.2960    | -17.8915   | 664265.7895 | -6.5945   |
| -6.5910                 |             |            |             |           |
| [80425]ENERGY: 19520000 | 3668.4912   | 5902.7516  | 5894.9997   |           |
| 378.4702                | -15454.9433 | -1800.4250 | 0.0000      | 0.0000    |
| 8947.3535               | 7536.6978   | 333.7791   | -1410.6557  | 7607.1898 |
| 334.7287                | 208.8356    | 101.0103   | 664265.7895 | -6.2887   |
| -6.2668                 |             |            |             |           |
| [80475]ENERGY: 19530000 | 3627.9831   | 6020.1805  | 5909.7713   |           |
| 362.3903                | -15443.8244 | -1827.2748 | 0.0000      | 0.0000    |
| 8886.2913               | 7535.5173   | 331.5012   | -1350.7740  | 7607.1538 |
| 334.7947                | -145.1795   | -150.8671  | 664265.7895 | -5.8666   |
| -5.8838                 |             |            |             |           |
| [80511]ENERGY: 19540000 | 3711.3042   | 5924.7183  | 5892.3103   |           |
| 351.3063                | -15466.9082 | -1879.7079 | 0.0000      | 0.0000    |
| 9001.8581               | 7534.8812   | 335.8124   | -1466.9769  | 7606.7369 |
| 334.9156                | -145.8511   | -72.2167   | 664265.7895 | -5.3283   |
| -5.3110                 |             |            |             |           |
| [80561]ENERGY: 19550000 | 3609.7550   | 6014.7052  | 5911.4549   |           |
| 346.6070                | -15424.6397 | -1874.8336 | 0.0000      | 0.0000    |
| 8952.2113               | 7535.2602   | 333.9603   | -1416.9512  | 7607.8077 |
| 334.8652                | -47.8565    | 48.1384    | 664265.7895 | -7.3397   |
| -7.3382                 |             |            |             |           |
| [80597]ENERGY: 19560000 | 3763.6566   | 5884.7726  | 5967.1372   |           |
| 334.8723                | -15521.5483 | -1903.8980 | 0.0000      | 0.0000    |
| 9011.6838               | 7536.6762   | 336.1789   | -1475.0075  | 7609.0213 |
| 334.7915                | -80.4723    | -66.2082   | 664265.7895 | -7.4346   |
| -7.4452                 |             |            |             |           |
| [80647]ENERGY: 19570000 | 3569.6171   | 5857.6895  | 5919.6829   |           |
| 344.0345                | -15352.1978 | -1815.6126 | 0.0000      | 0.0000    |
| 9013.9682               | 7537.1817   | 336.2641   | -1476.7864  | 7608.3018 |
| 334.8329                | 148.8835    | 115.6850   | 664265.7895 | -6.1929   |
| -6.2096                 |             |            |             |           |
| [80683]ENERGY: 19580000 | 3596.5764   | 5949.6948  | 5899.8775   |           |
| 368.1810                | -15416.8762 | -1785.4470 | 0.0000      | 0.0000    |
| 8926.2486               | 7538.2551   | 332.9918   | -1387.9935  | 7608.4431 |
| 334.6787                | 30.1385     | 98.2424    | 664265.7895 | -8.7149   |
| -8.6896                 |             |            |             |           |
| [80733]ENERGY: 19590000 | 3618.2351   | 5927.7672  | 5864.4286   |           |
| 398.2887                | -15368.0104 | -1849.7076 | 0.0000      | 0.0000    |
| 8948.7328               | 7539.7344   | 333.8306   | -1408.9984  | 7609.6424 |
| 334.8198                | 99.7526     | 37.4146    | 664265.7895 | -5.4406   |
| -5.4499                 |             |            |             |           |
| [80772]ENERGY: 19600000 | 3685.6355   | 5929.6623  | 5942.0296   |           |
| 356.4287                | -15358.5620 | -1866.0233 | 0.0000      | 0.0000    |
| 8854.5679               | 7543.7387   | 330.3177   | -1310.8292  | 7609.6160 |
| 334.8128                | 118.6596    | 23.2508    | 664265.7895 | -9.6130   |
| -9.6166                 |             |            |             |           |
| [80822]ENERGY: 19610000 | 3654.0691   | 5916.5639  | 5865.5122   |           |
| 357.0978                | -15410.0321 | -1811.8769 | 0.0000      | 0.0000    |

## Supplementary Text 6

|                         |             |            |             |           |
|-------------------------|-------------|------------|-------------|-----------|
| 8970.9303               | 7542.2643   | 334.6586   | -1428.6660  | 7610.0894 |
| 334.8867                | -7.3603     | 11.4743    | 664265.7895 | -9.6708   |
| -9.6763                 |             |            |             |           |
| [80858]ENERGY: 19620000 | 3672.6706   | 5916.2111  | 5862.7034   |           |
| 356.9314                | -15325.8488 | -1854.8396 | 0.0000      | 0.0000    |
| 8912.4243               | 7540.2523   | 332.4761   | -1372.1720  | 7609.2305 |
| 334.8945                | 79.0994     | -9.3458    | 664265.7895 | -8.8434   |
| -8.8614                 |             |            |             |           |
| [80908]ENERGY: 19630000 | 3696.3084   | 5903.1037  | 5912.3768   |           |
| 354.6926                | -15434.1264 | -1818.9820 | 0.0000      | 0.0000    |
| 8926.6537               | 7540.0267   | 333.0069   | -1386.6270  | 7610.1906 |
| 334.9484                | 25.3268     | -72.1813   | 664265.7895 | -11.4704  |
| -11.4466                |             |            |             |           |
| [80944]ENERGY: 19640000 | 3640.7850   | 5855.0240  | 5908.4130   |           |
| 358.0608                | -15438.1641 | -1897.2779 | 0.0000      | 0.0000    |
| 9107.3239               | 7534.1648   | 339.7468   | -1573.1591  | 7610.4141 |
| 334.6406                | -60.8408    | -48.0186   | 664265.7895 | -9.4442   |
| -9.4648                 |             |            |             |           |
| [80994]ENERGY: 19650000 | 3652.0246   | 5971.9828  | 5940.9239   |           |
| 383.8734                | -15461.5092 | -1884.4024 | 0.0000      | 0.0000    |
| 8933.9648               | 7536.8580   | 333.2796   | -1397.1068  | 7611.6000 |
| 334.9068                | -49.9086    | -44.8017   | 664265.7895 | -7.8700   |
| -7.8542                 |             |            |             |           |
| [81030]ENERGY: 19660000 | 3609.8963   | 5745.2055  | 5929.2262   |           |
| 344.6939                | -15352.5756 | -1846.2574 | 0.0000      | 0.0000    |
| 9109.0429               | 7539.2317   | 339.8109   | -1569.8112  | 7610.7011 |
| 334.7716                | 63.5829     | 53.1667    | 664265.7895 | -9.1844   |
| -9.1729                 |             |            |             |           |
| [81080]ENERGY: 19670000 | 3639.3696   | 5918.8002  | 5923.7976   |           |
| 353.7975                | -15371.2996 | -1800.2749 | 0.0000      | 0.0000    |
| 8876.2490               | 7540.4395   | 331.1266   | -1335.8096  | 7612.4856 |
| 335.0191                | 35.3089     | 84.4960    | 664265.7895 | -5.8822   |
| -5.8905                 |             |            |             |           |
| [81116]ENERGY: 19680000 | 3667.0392   | 5781.1169  | 5921.9011   |           |
| 352.8783                | -15483.7104 | -1810.8559 | 0.0000      | 0.0000    |
| 9105.2662               | 7533.6355   | 339.6700   | -1571.6308  | 7610.1147 |
| 335.0426                | 36.1148     | 80.6549    | 664265.7895 | -6.7148   |
| -6.7172                 |             |            |             |           |
| [81166]ENERGY: 19690000 | 3626.3759   | 5932.1575  | 5945.1072   |           |
| 378.6000                | -15474.4046 | -1876.1076 | 0.0000      | 0.0000    |
| 9003.0829               | 7534.8113   | 335.8581   | -1468.2715  | 7610.2216 |
| 335.0593                | 34.7882     | -68.0485   | 664265.7895 | -8.2366   |
| -8.2403                 |             |            |             |           |
| [81205]ENERGY: 19700000 | 3683.1025   | 5864.6279  | 5922.5545   |           |
| 368.8042                | -15517.4286 | -1881.0861 | 0.0000      | 0.0000    |
| 9093.9837               | 7534.5582   | 339.2491   | -1559.4255  | 7610.4363 |
| 335.0165                | -207.9326   | -175.1551  | 664265.7895 | -9.8219   |
| -9.7997                 |             |            |             |           |
| [81255]ENERGY: 19710000 | 3687.8085   | 5816.6698  | 5945.8229   |           |
| 355.1399                | -15317.4509 | -1934.8234 | 0.0000      | 0.0000    |
| 8985.4815               | 7538.6482   | 335.2015   | -1446.8333  | 7611.2597 |
| 334.7209                | -93.0830    | -52.5125   | 664265.7895 | -12.4644  |
| -12.4605                |             |            |             |           |
| [81291]ENERGY: 19720000 | 3600.5518   | 5937.8290  | 5924.2603   |           |



## Supplementary Text 6

|                         |             |            |             |           |
|-------------------------|-------------|------------|-------------|-----------|
| 359.6775                | -15395.3370 | -1828.4560 | 0.0000      | 0.0000    |
| 8940.6981               | 7539.2236   | 333.5308   | -1401.4745  | 7610.8369 |
| 334.7655                | 49.5920     | 126.7976   | 664265.7895 | -11.3808  |
| -11.4011                |             |            |             |           |
| [81341]ENERGY: 19730000 | 3748.4942   | 5869.8039  | 5915.4239   |           |
| 353.1687                | -15398.8735 | -1872.1755 | 0.0000      | 0.0000    |
| 8921.9636               | 7537.8053   | 332.8319   | -1384.1582  | 7609.3561 |
| 334.9369                | -44.0608    | -23.1914   | 664265.7895 | -10.0295  |
| -10.0241                |             |            |             |           |
| [81377]ENERGY: 19740000 | 3690.2651   | 5831.8026  | 5894.1720   |           |
| 354.4555                | -15387.5229 | -1863.3620 | 0.0000      | 0.0000    |
| 9018.9440               | 7538.7541   | 336.4498   | -1480.1898  | 7611.5076 |
| 334.8728                | -93.3907    | -166.7281  | 664265.7895 | -12.1600  |
| -12.1794                |             |            |             |           |
| [81427]ENERGY: 19750000 | 3559.9028   | 5919.5978  | 5907.6025   |           |
| 357.2007                | -15374.4479 | -1887.6982 | 0.0000      | 0.0000    |
| 9054.8917               | 7537.0494   | 337.7908   | -1517.8423  | 7610.6576 |
| 334.9475                | 12.9141     | 48.5685    | 664265.7895 | -7.4737   |
| -7.4619                 |             |            |             |           |
| [81463]ENERGY: 19760000 | 3725.9071   | 5907.5266  | 5869.4622   |           |
| 371.4556                | -15476.1083 | -1889.1379 | 0.0000      | 0.0000    |
| 9031.5661               | 7540.6712   | 336.9206   | -1490.8949  | 7611.9054 |
| 334.9840                | -64.1186    | -117.9134  | 664265.7895 | -10.4619  |
| -10.4718                |             |            |             |           |
| [81513]ENERGY: 19770000 | 3620.6053   | 5934.9012  | 5882.6861   |           |
| 342.4645                | -15362.3555 | -1893.7094 | 0.0000      | 0.0000    |
| 9015.1948               | 7539.7870   | 336.3099   | -1475.4079  | 7613.5499 |
| 335.0149                | 60.7082     | 100.5179   | 664265.7895 | -11.7539  |
| -11.7393                |             |            |             |           |
| [81549]ENERGY: 19780000 | 3579.6526   | 5855.9159  | 5940.7285   |           |
| 361.6494                | -15399.2919 | -1863.0286 | 0.0000      | 0.0000    |
| 9062.6005               | 7538.2265   | 338.0784   | -1524.3741  | 7613.7698 |
| 334.9210                | 122.8220    | 31.9004    | 664265.7895 | -9.5190   |
| -9.5312                 |             |            |             |           |
| [81599]ENERGY: 19790000 | 3593.1517   | 5869.4754  | 5921.6462   |           |
| 354.7189                | -15371.4524 | -1843.2919 | 0.0000      | 0.0000    |
| 9015.3179               | 7539.5658   | 336.3145   | -1475.7521  | 7612.4344 |
| 334.8437                | 73.0914     | 79.0541    | 664265.7895 | -9.6087   |
| -9.6047                 |             |            |             |           |
| [81638]ENERGY: 19800000 | 3673.7143   | 5838.2163  | 5946.4266   |           |
| 347.6658                | -15457.0986 | -1878.9417 | 0.0000      | 0.0000    |
| 9070.6141               | 7540.5968   | 338.3773   | -1530.0173  | 7613.7127 |
| 335.0224                | 118.4894    | 28.0706    | 664265.7895 | -10.2764  |
| -10.2769                |             |            |             |           |
| [81688]ENERGY: 19810000 | 3653.7010   | 5866.2176  | 5968.3259   |           |
| 370.5145                | -15393.0814 | -1923.0786 | 0.0000      | 0.0000    |
| 8998.7385               | 7541.3375   | 335.6960   | -1457.4010  | 7617.1734 |
| 335.1145                | 124.9705    | 57.8508    | 664265.7895 | -8.2680   |
| -8.2721                 |             |            |             |           |
| [81724]ENERGY: 19820000 | 3663.3256   | 5986.3020  | 5844.2451   |           |
| 342.7528                | -15458.3855 | -1825.0408 | 0.0000      | 0.0000    |
| 8990.8793               | 7544.0785   | 335.4028   | -1446.8008  | 7615.4450 |
| 334.9868                | -47.2650    | -24.9880   | 664265.7895 | -8.3551   |
| -8.3384                 |             |            |             |           |

## Supplementary Text 6

|                         |             |            |             |
|-------------------------|-------------|------------|-------------|
| [81774]ENERGY: 19830000 | 3606.6820   | 5999.3987  | 5893.7790   |
| 356.3058                | -15414.2567 | -1872.4937 | 0.0000      |
| 8974.6414               | 7544.0565   | 334.7971   | -1430.5849  |
| 334.8889                | 17.1359     | -8.5380    | 664265.7895 |
| -8.7365                 |             |            | -8.7488     |
| [81810]ENERGY: 19840000 | 3681.1097   | 6009.3621  | 5859.7201   |
| 354.9645                | -15461.7038 | -1871.2772 | 0.0000      |
| 8970.6017               | 7542.7771   | 334.6464   | -1427.8246  |
| 335.0751                | 61.7126     | -69.3298   | 664265.7895 |
| -7.3410                 |             |            | -7.3106     |
| [81860]ENERGY: 19850000 | 3640.3434   | 5883.7024  | 5926.7158   |
| 365.0565                | -15370.2766 | -1880.1162 | 0.0000      |
| 8978.6551               | 7544.0802   | 334.9468   | -1434.5748  |
| 335.0348                | 66.8633     | -66.5428   | 664265.7895 |
| -9.7155                 |             |            | -9.7198     |
| [81896]ENERGY: 19860000 | 3683.3255   | 5903.4426  | 5914.8916   |
| 352.6396                | -15431.8890 | -1800.7935 | 0.0000      |
| 8924.5065               | 7546.1233   | 332.9268   | -1378.3832  |
| 335.1501                | 27.5341     | 26.6772    | 664265.7895 |
| -4.8609                 |             |            | -4.8686     |
| [81946]ENERGY: 19870000 | 3670.0106   | 5942.2603  | 5910.3937   |
| 363.5375                | -15441.6755 | -1835.9320 | 0.0000      |
| 8940.0457               | 7548.6403   | 333.5065   | -1391.4054  |
| 335.0312                | -10.1726    | -21.7286   | 664265.7895 |
| -7.2075                 |             |            | -7.2188     |
| [81982]ENERGY: 19880000 | 3683.9541   | 5970.5241  | 5870.3836   |
| 370.3940                | -15455.7838 | -1838.2038 | 0.0000      |
| 8944.0294               | 7545.2977   | 333.6551   | -1398.7317  |
| 335.0395                | 89.3374     | 76.4723    | 664265.7895 |
| -8.3269                 |             |            | -8.3211     |
| [82032]ENERGY: 19890000 | 3624.0955   | 5917.7220  | 5865.3720   |
| 334.0565                | -15422.0638 | -1809.3489 | 0.0000      |
| 9037.9000               | 7547.7332   | 337.1569   | -1490.1667  |
| 335.1868                | 130.9413    | 17.7935    | 664265.7895 |
| -12.4616                |             |            | -12.4762    |
| [82071]ENERGY: 19900000 | 3645.8248   | 5989.6009  | 5909.2283   |
| 362.9527                | -15503.3663 | -1835.3756 | 0.0000      |
| 8974.8844               | 7543.7492   | 334.8061   | -1431.1352  |
| 335.2392                | -8.3196     | -79.1421   | 664265.7895 |
| -11.8633                |             |            | -11.8494    |
| [82121]ENERGY: 19910000 | 3644.4354   | 5990.1747  | 5868.9478   |
| 376.8259                | -15528.7459 | -1784.5449 | 0.0000      |
| 8978.5999               | 7545.6929   | 334.9447   | -1432.9070  |
| 335.2354                | -7.1650     | 3.7928     | 664265.7895 |
| -8.1353                 |             |            | -8.1253     |
| [82157]ENERGY: 19920000 | 3696.7217   | 6032.7140  | 5864.4661   |
| 353.7606                | -15586.2617 | -1806.6178 | 0.0000      |
| 8991.0074               | 7545.7902   | 335.4076   | -1445.2172  |
| 335.2579                | 73.7068     | 22.8379    | 664265.7895 |
| -10.7575                |             |            | -10.7409    |
| [82207]ENERGY: 19930000 | 3628.1049   | 5875.3370  | 5980.1045   |
| 379.4657                | -15492.1588 | -1872.5545 | 0.0000      |
| 9047.9359               | 7546.2348   | 337.5313   | -1501.7011  |
| 335.1571                | -9.4016     | -15.0346   | 664265.7895 |
|                         |             |            | -12.2481    |

Supplementary Text 6

-12.2294  
 [82243]ENERGY: 19940000      3730.7512      5876.0600      5889.7032  
 355.1020      -15408.5337      -1885.2163      0.0000      0.0000  
 8987.6588      7545.5252      335.2827      -1442.1336      7618.3223  
 335.1870      -109.4774      -174.5870      664265.7895      -8.8332  
 -8.8405  
 [82293]ENERGY: 19950000      3703.7563      5847.4328      5873.8903  
 335.8592      -15370.4397      -1862.6807      0.0000      0.0000  
 9019.9436      7547.7619      336.4871      -1472.1817      7618.9998  
 335.0428      16.6848      58.1485      664265.7895      -10.1633  
 -10.1352  
 [82329]ENERGY: 19960000      3577.9693      5884.2922      5921.9310  
 388.6639      -15395.0622      -1836.6339      0.0000      0.0000  
 9006.6605      7547.8209      335.9915      -1458.8397      7617.2164  
 334.8656      37.4979      100.6687      664265.7895      -8.5862  
 -8.5934  
 [82379]ENERGY: 19970000      3668.1476      5999.0197      5927.6697  
 356.2152      -15489.4931      -1880.2959      0.0000      0.0000  
 8962.1177      7543.3809      334.3299      -1418.7368      7616.6982  
 335.0338      -38.1313      -36.0085      664265.7895      -5.7119  
 -5.7287  
 [82415]ENERGY: 19980000      3662.6598      5882.5886      5912.6364  
 369.6424      -15453.8194      -1840.7259      0.0000      0.0000  
 9011.7375      7544.7195      336.1809      -1467.0181      7618.6432  
 335.2995      -16.4432      -39.0769      664265.7895      -15.5055  
 -15.4924  
 [82465]ENERGY: 19990000      3622.9186      5946.4593      5847.0585  
 352.4763      -15356.6894      -1886.1192      0.0000      0.0000  
 9018.0070      7544.1111      336.4148      -1473.8959      7618.0728  
 335.1493      -120.9222      -64.7377      664265.7895      -8.2970  
 -8.3024  
 [82504]ENERGY: 20000000      3670.6430      5934.7480      5899.1671  
 369.0531      -15453.2987      -1875.9043      0.0000      0.0000  
 9000.0801      7544.4884      335.7460      -1455.5917      7619.7670  
 335.0234      81.6217      69.9675      664265.7895      -9.7996  
 -9.8123
