# Supplementary material for: Insights into the mechanism(s) of digestion of crystalline cellulose by plant class C GH9 endoglucanases
Source: PubMed Central journal article supplement (PMC7385011; doi:10.1007/s00894-019-4133-1), 2019-07-23
Supplement: 894_2019_4133_MOESM11_ESM.pdf [file 894_2019_4133_MOESM11_ESM.pdf]

Supplementary Text 9

| Q5NAT0_40.1ns (DCCM) |               |               |               |               |     |
|----------------------|---------------|---------------|---------------|---------------|-----|
| 1                    | 2             | 3             | 4             | 5             |     |
| 6                    | 7             | 8             | 9             | 10            | 11  |
| 1.0000000000         | 0.6329574727  | 0.5487618611  | 0.5034660769  | 0.4982403161  |     |
| 0.4660173095         | 0.4174232619  | 0.3910167831  | 0.3888448086  | 0.3427715227  |     |
| 0.2654670674         |               |               |               |               |     |
|                      | 12            | 13            | 14            | 15            | 16  |
| 17                   | 18            | 19            | 20            | 21            | 22  |
| 0.2848478804         | 0.2583188158  | 0.1901067227  | 0.1692766791  | 0.1918914960  |     |
| 0.1379938618         | 0.0861545053  | 0.0421602413  | 0.0302260522  | 0.0583042947  |     |
| 0.0860376069         |               |               |               |               |     |
|                      | 23            | 24            | 25            | 26            | 27  |
| 28                   | 29            | 30            | 31            | 32            | 33  |
| 0.0708933861         | 0.0634811032  | 0.1012226187  | 0.1422060437  | 0.1858663745  |     |
| 0.2001954136         | 0.2061858446  | 0.1713842060  | 0.1369330807  | 0.1159130968  |     |
| 0.0821405269         |               |               |               |               |     |
|                      | 34            | 35            | 36            | 37            | 38  |
| 39                   | 40            | 41            | 42            | 43            | 44  |
| 0.0721436341         | 0.0403727890  | -0.0044060569 | -0.0252891255 | -0.0398998052 |     |
| -0.0898019199        | -0.0859473839 | -0.0943720391 | -0.1276536912 | -0.1192855976 |     |
| -0.1293641073        |               |               |               |               |     |
|                      | 45            | 46            | 47            | 48            | 49  |
| 50                   | 51            | 52            | 53            | 54            | 55  |
| -0.0986950113        | -0.0907779985 | -0.0375210347 | -0.0238687495 | -0.0156981231 |     |
| 0.0433018119         | 0.0556066513  | 0.0612227180  | 0.0820901813  | 0.1178339077  |     |
| 0.0839497620         |               |               |               |               |     |
|                      | 56            | 57            | 58            | 59            | 60  |
| 61                   | 62            | 63            | 64            | 65            | 66  |
| 0.0477047161         | 0.0016561867  | -0.0250345960 | -0.0652476962 | -0.1191080873 |     |
| -0.1351611153        | -0.0449927530 | -0.0474583777 | -0.1231882577 | -0.0697504621 |     |
| 0.0065356722         |               |               |               |               |     |
|                      | 67            | 68            | 69            | 70            | 71  |
| 72                   | 73            | 74            | 75            | 76            | 77  |
| -0.0573620859        | -0.0878844549 | 0.0155867421  | 0.0343491299  | -0.0443748395 |     |
| -0.0171270963        | 0.0715250005  | 0.0297316530  | -0.0023182185 | 0.0389489205  |     |
| 0.1310750444         |               |               |               |               |     |
|                      | 78            | 79            | 80            | 81            | 82  |
| 83                   | 84            | 85            | 86            | 87            | 88  |
| 0.1391592846         | 0.1923047675  | 0.2872027943  | 0.2466928796  | 0.2056292888  |     |
| 0.2674699444         | 0.3109124700  | 0.2504470819  | 0.2230476613  | 0.1536830689  |     |
| 0.1242876453         |               |               |               |               |     |
|                      | 89            | 90            | 91            | 92            | 93  |
| 94                   | 95            | 96            | 97            | 98            | 99  |
| 0.1391678639         | 0.0984770326  | 0.0371273250  | 0.0382861904  | 0.0503530052  |     |
| -0.0223284134        | -0.0439739776 | -0.0204812253 | -0.0606014843 | -0.1170949883 |     |
| -0.0976797582        |               |               |               |               |     |
|                      | 100           | 101           | 102           | 103           | 104 |
| 105                  | 106           | 107           | 108           | 109           | 110 |
| -0.1007226571        | -0.1644890361 | -0.1669826013 | -0.1529185778 | -0.1804734287 |     |
| -0.2245998196        | -0.1775985947 | -0.2322883698 | -0.2424611294 | -0.2928858523 |     |
| -0.2726210529        |               |               |               |               |     |
|                      | 111           | 112           | 113           | 114           | 115 |
| 116                  | 117           | 118           | 119           | 120           | 121 |
| -0.2379306316        | -0.2016620875 | -0.1533703862 | -0.1206460262 | -0.0791618878 |     |

Supplementary Text 9

|               |               |               |               |               |     |  |
|---------------|---------------|---------------|---------------|---------------|-----|--|
| -0.0429608132 | -0.0438828408 | -0.0188109715 | 0.0184124899  | 0.0153720737  |     |  |
| 0.0293836269  |               |               |               |               |     |  |
|               | 122           | 123           | 124           | 125           | 126 |  |
| 127           | 128           | 129           | 130           | 131           | 132 |  |
| 0.0472008959  | 0.0667915685  | 0.0797875772  | 0.1064539429  | 0.1052504590  |     |  |
| 0.1201735248  | 0.0944608636  | 0.1029718330  | 0.0882785539  | 0.0483133869  |     |  |
| 0.0304089839  |               |               |               |               |     |  |
|               | 133           | 134           | 135           | 136           | 137 |  |
| 138           | 139           | 140           | 141           | 142           | 143 |  |
| 0.0092659014  | -0.0417045315 | -0.0606154975 | -0.1100902057 | -0.1346941014 |     |  |
| -0.1634368670 | -0.2171592928 | -0.2333675749 | -0.2849681936 | -0.3296363521 |     |  |
| -0.2666537967 |               |               |               |               |     |  |
|               | 144           | 145           | 146           | 147           | 148 |  |
| 149           | 150           | 151           | 152           | 153           | 154 |  |
| -0.2802941654 | -0.3277646549 | -0.3281554862 | -0.3347922302 | -0.2626511698 |     |  |
| -0.2817899118 | -0.3406440935 | -0.3427275512 | -0.2581478284 | -0.2603631213 |     |  |
| -0.3204499692 |               |               |               |               |     |  |
|               | 155           | 156           | 157           | 158           | 159 |  |
| 160           | 161           | 162           | 163           | 164           | 165 |  |
| -0.2865063991 | -0.2148023151 | -0.2442728128 | -0.2650342081 | -0.1711525360 |     |  |
| -0.1481504267 | -0.2059645139 | -0.1654970302 | -0.0974507764 | -0.1369050959 |     |  |
| -0.1524018493 |               |               |               |               |     |  |
|               | 166           | 167           | 168           | 169           | 170 |  |
| 171           | 172           | 173           | 174           | 175           | 176 |  |
| -0.0878814593 | -0.0725904729 | -0.1101739066 | -0.1718001099 | -0.1547934725 |     |  |
| -0.1378811903 | -0.1960984515 | -0.2412999122 | -0.2414313545 | -0.2433079100 |     |  |
| -0.2821427185 |               |               |               |               |     |  |
|               | 177           | 178           | 179           | 180           | 181 |  |
| 182           | 183           | 184           | 185           | 186           | 187 |  |
| -0.3166705294 | -0.3269039645 | -0.3328047796 | -0.3486063777 | -0.3674892940 |     |  |
| -0.3627054506 | -0.3763350947 | -0.3794280849 | -0.3804664788 | -0.3797332087 |     |  |
| -0.3627609882 |               |               |               |               |     |  |
|               | 188           | 189           | 190           | 191           | 192 |  |
| 193           | 194           | 195           | 196           | 197           | 198 |  |
| -0.3429655826 | -0.3531093558 | -0.3518263693 | -0.3129073153 | -0.2797271139 |     |  |
| -0.2072805235 | -0.2286886816 | -0.2463056225 | -0.2025828331 | -0.1625104576 |     |  |
| -0.1565656669 |               |               |               |               |     |  |
|               | 199           | 200           | 201           | 202           | 203 |  |
| 204           | 205           | 206           | 207           | 208           | 209 |  |
| -0.1638099927 | -0.1423320332 | -0.1020504119 | -0.0855134921 | -0.0744673386 |     |  |
| -0.0902574377 | -0.0738109340 | -0.0766479442 | -0.1238177689 | -0.1784925605 |     |  |
| -0.2074592608 |               |               |               |               |     |  |
|               | 210           | 211           | 212           | 213           | 214 |  |
| 215           | 216           | 217           | 218           | 219           | 220 |  |
| -0.2780676696 | -0.3195817230 | -0.3106708907 | -0.2833502078 | -0.3509459614 |     |  |
| -0.3240791875 | -0.2844828436 | -0.3464652919 | -0.3437477065 | -0.2773235000 |     |  |
| -0.2640823789 |               |               |               |               |     |  |
|               | 221           | 222           | 223           | 224           | 225 |  |
| 226           | 227           | 228           | 229           | 230           | 231 |  |
| -0.3056515031 | -0.2746704913 | -0.2014540208 | -0.2220601025 | -0.2326322669 |     |  |
| -0.2608418643 | -0.2679249258 | -0.3087910038 | -0.3355177817 | -0.3186834111 |     |  |
| -0.3382401497 |               |               |               |               |     |  |
|               | 232           | 233           | 234           | 235           | 236 |  |
| 237           | 238           | 239           | 240           | 241           | 242 |  |

Supplementary Text 9

|               |               |               |               |               |     |  |
|---------------|---------------|---------------|---------------|---------------|-----|--|
| -0.3389090325 | -0.3294709823 | -0.2980729187 | -0.2931538398 | -0.2925353892 |     |  |
| -0.3051805203 | -0.2657448907 | -0.2192069265 | -0.2312663046 | -0.1855439330 |     |  |
| -0.1915210281 |               |               |               |               |     |  |
|               | 243           | 244           | 245           | 246           | 247 |  |
| 248           | 249           | 250           | 251           | 252           | 253 |  |
| -0.1522895764 | -0.1556154172 | -0.1497319767 | -0.1356550001 | -0.0786931777 |     |  |
| -0.0444726570 | -0.0267527844 | 0.0268301788  | -0.0323227066 | -0.0248073067 |     |  |
| -0.0887845296 |               |               |               |               |     |  |
|               | 254           | 255           | 256           | 257           | 258 |  |
| 259           | 260           | 261           | 262           | 263           | 264 |  |
| -0.0961504760 | -0.1444986147 | -0.1761553287 | -0.2036775262 | -0.1343302093 |     |  |
| -0.1269398048 | -0.2084030373 | -0.1876063591 | -0.1188956469 | -0.1586740352 |     |  |
| -0.2100111052 |               |               |               |               |     |  |
|               | 265           | 266           | 267           | 268           | 269 |  |
| 270           | 271           | 272           | 273           | 274           | 275 |  |
| -0.1507775463 | -0.1339613663 | -0.1919755978 | -0.1831730142 | -0.1414337874 |     |  |
| -0.1490340821 | -0.1867922540 | -0.2267167654 | -0.2211725704 | -0.2622351235 |     |  |
| -0.2443012207 |               |               |               |               |     |  |
|               | 276           | 277           | 278           | 279           | 280 |  |
| 281           | 282           | 283           | 284           | 285           | 286 |  |
| -0.2214826251 | -0.2456660995 | -0.2398733021 | -0.2577563697 | -0.2390929938 |     |  |
| -0.2008624918 | -0.2147458592 | -0.2127804857 | -0.1659497335 | -0.1554089867 |     |  |
| -0.1543464227 |               |               |               |               |     |  |
|               | 287           | 288           | 289           | 290           | 291 |  |
| 292           | 293           | 294           | 295           | 296           | 297 |  |
| -0.1162959154 | -0.0739437750 | -0.0840225634 | -0.0456008124 | 0.0114944419  |     |  |
| 0.0008765822  | 0.0032618303  | 0.0694339601  | 0.0739273432  | 0.0332334994  |     |  |
| -0.0134003203 |               |               |               |               |     |  |
|               | 298           | 299           | 300           | 301           | 302 |  |
| 303           | 304           | 305           | 306           | 307           | 308 |  |
| -0.0726823196 | -0.1007486681 | -0.0939163059 | -0.0461810365 | 0.0060731953  |     |  |
| 0.0345110074  | 0.0762852314  | 0.1599092630  | 0.2150748974  | 0.2070250942  |     |  |
| 0.2524542699  |               |               |               |               |     |  |
|               | 309           | 310           | 311           | 312           | 313 |  |
| 314           | 315           | 316           | 317           | 318           | 319 |  |
| 0.2394879594  | 0.2420919383  | 0.1776631520  | 0.1279445759  | 0.0649260898  |     |  |
| 0.0710302664  | 0.1453628353  | 0.1280708628  | 0.1769718561  | 0.1966180278  |     |  |
| 0.2734024383  |               |               |               |               |     |  |
|               | 320           | 321           | 322           | 323           | 324 |  |
| 325           | 326           | 327           | 328           | 329           | 330 |  |
| 0.1905546335  | 0.1337442005  | 0.2209136477  | 0.2518215201  | 0.1272916654  |     |  |
| 0.1112645227  | 0.2041929721  | 0.1854140626  | 0.0767434100  | 0.1137684540  |     |  |
| 0.1712043199  |               |               |               |               |     |  |
|               | 331           | 332           | 333           | 334           | 335 |  |
| 336           | 337           | 338           | 339           | 340           | 341 |  |
| 0.0889848383  | 0.0364038965  | 0.0937540806  | 0.0754614273  | 0.0171874527  |     |  |
| -0.0225873620 | -0.0662620795 | -0.0245019963 | 0.0059737049  | 0.0359882126  |     |  |
| -0.0206710767 |               |               |               |               |     |  |
|               | 342           | 343           | 344           | 345           | 346 |  |
| 347           | 348           | 349           | 350           | 351           | 352 |  |
| -0.0245399506 | -0.0575105971 | -0.0784637232 | -0.0579155807 | -0.0056271608 |     |  |
| 0.0525649610  | 0.0593295223  | 0.0799084094  | 0.1025692198  | 0.0929809783  |     |  |
| 0.0879487337  |               |               |               |               |     |  |
|               | 353           | 354           | 355           | 356           | 357 |  |

Supplementary Text 9

|              |              |              |              |              |     |
|--------------|--------------|--------------|--------------|--------------|-----|
| 358          | 359          | 360          | 361          | 362          | 363 |
| 0.1109399449 | 0.1646377339 | 0.1691921497 | 0.1621847137 | 0.2197961301 |     |
| 0.2644336672 | 0.2586170465 | 0.2892993157 | 0.3702618051 | 0.3973620484 |     |
| 0.3675564616 |              |              |              |              |     |
|              | 364          | 365          | 366          | 367          | 368 |
| 369          | 370          | 371          | 372          | 373          | 374 |
| 0.4594880713 | 0.5584789962 | 0.4625872368 | 0.4463832102 | 0.5834528282 |     |
| 0.5806619502 | 0.6022651105 | 0.4993424169 | 0.4461901935 | 0.3790837304 |     |
| 0.3551645184 |              |              |              |              |     |
|              | 375          | 376          | 377          | 378          | 379 |
| 380          | 381          | 382          | 383          | 384          | 385 |
| 0.4581096251 | 0.5128886308 | 0.4232815991 | 0.4091591148 | 0.3755112580 |     |
| 0.3628408384 | 0.4102160472 | 0.4114635697 | 0.3554112543 | 0.3303039187 |     |
| 0.3732906052 |              |              |              |              |     |
|              | 386          | 387          | 388          | 389          | 390 |
| 391          | 392          | 393          | 394          | 395          | 396 |
| 0.3271235186 | 0.3003851282 | 0.2864439177 | 0.2753357958 | 0.2203023391 |     |
| 0.1807797273 | 0.1527434424 | 0.1634337620 | 0.2153565862 | 0.2071945578 |     |
| 0.1751820789 |              |              |              |              |     |
|              | 397          | 398          | 399          | 400          | 401 |
| 402          | 403          | 404          | 405          | 406          | 407 |
| 0.1521061245 | 0.1246640313 | 0.1122912211 | 0.0937380393 | 0.1196048352 |     |
| 0.1502884484 | 0.1796075046 | 0.1712752361 | 0.1926993437 | 0.2236861292 |     |
| 0.2588691680 |              |              |              |              |     |
|              | 408          | 409          | 410          | 411          | 412 |
| 413          | 414          | 415          | 416          | 417          | 418 |
| 0.2477665183 | 0.2185315058 | 0.2203105013 | 0.2481591412 | 0.2563106612 |     |
| 0.3181156065 | 0.3277209599 | 0.3026131830 | 0.3400736218 | 0.3208825195 |     |
| 0.2739020477 |              |              |              |              |     |
|              | 419          | 420          | 421          | 422          | 423 |
| 424          | 425          | 426          | 427          | 428          | 429 |
| 0.3126220880 | 0.2945190023 | 0.2135101770 | 0.1650175826 | 0.2168567348 |     |
| 0.2754380868 | 0.3158796585 | 0.3178978610 | 0.3214673802 | 0.2984937786 |     |
| 0.2571528974 |              |              |              |              |     |
|              | 430          | 431          | 432          | 433          | 434 |
| 435          | 436          | 437          | 438          | 439          | 440 |
| 0.2165445994 | 0.1752380556 | 0.1766393272 | 0.1686018590 | 0.1646219588 |     |
| 0.2543056332 | 0.2733758680 | 0.2270606363 | 0.2504696180 | 0.1729201359 |     |
| 0.1738864495 |              |              |              |              |     |
|              | 441          | 442          | 443          | 444          | 445 |
| 446          | 447          | 448          | 449          | 450          | 451 |
| 0.1501322699 | 0.2528516913 | 0.2739915340 | 0.1729230814 | 0.1925851969 |     |
| 0.3008465608 | 0.2963220686 | 0.2515775861 | 0.3030333672 | 0.3904867784 |     |
| 0.3042671692 |              |              |              |              |     |
|              | 452          | 453          | 454          | 455          | 456 |
| 457          | 458          | 459          | 460          | 461          | 462 |
| 0.2839156830 | 0.4137788376 | 0.4639163536 | 0.3780422189 | 0.3328971967 |     |
| 0.3783477207 | 0.4199323458 | 0.5035578423 | 0.4662190741 | 0.4149744773 |     |
| 0.3786138140 |              |              |              |              |     |
|              | 463          | 464          | 465          | 466          | 467 |
| 468          | 469          | 470          | 471          | 472          | 473 |
| 0.3797601114 | 0.3029700528 | 0.3069623634 | 0.2733587561 | 0.2725444458 |     |
| 0.2804561833 | 0.2490631701 | 0.2424189088 | 0.2119031610 | 0.2151558765 |     |
| 0.1767403703 |              |              |              |              |     |

Supplementary Text 9

|               |               |  |               |  |               |  |               |  |     |
|---------------|---------------|--|---------------|--|---------------|--|---------------|--|-----|
|               | 474           |  | 475           |  | 476           |  | 477           |  | 478 |
| 479           | 480           |  | 481           |  | 482           |  | 483           |  | 484 |
| 0.1364417661  | 0.1202762661  |  | 0.1035550744  |  | 0.0541819087  |  | 0.0075027533  |  |     |
| -0.0106809976 | -0.0663416064 |  | -0.0362563839 |  | -0.0861659367 |  | -0.1105122051 |  |     |
| -0.0499239458 |               |  |               |  |               |  |               |  |     |
|               | 485           |  | 486           |  | 487           |  | 488           |  | 489 |
| 490           | 491           |  | 492           |  | 493           |  | 494           |  | 495 |
| -0.1489382326 | -0.1426036249 |  | -0.2048682918 |  | -0.2504635338 |  | -0.2772157514 |  |     |
| -0.2296491723 | -0.0818045808 |  | -0.1107585889 |  | 0.0221547738  |  | -0.0288039886 |  |     |
| 0.0541908604  |               |  |               |  |               |  |               |  |     |
|               | 496           |  | 497           |  | 498           |  | 499           |  | 500 |
| 501           | 502           |  | 503           |  | 504           |  | 505           |  | 506 |
| 0.0721141390  | 0.0900868825  |  | 0.1057354724  |  | 0.1156701186  |  | 0.1206372622  |  |     |
| 0.1426074604  | 0.1384406426  |  | 0.1146996567  |  | 0.1010833120  |  | 0.0971202428  |  |     |
| 0.0906259595  |               |  |               |  |               |  |               |  |     |
|               | 507           |  | 508           |  | 509           |  | 510           |  | 511 |
| 512           | 513           |  | 514           |  | 515           |  | 516           |  | 517 |
| 0.0664430870  | 0.0222449587  |  | 0.0392431199  |  | -0.1159869544 |  | -0.1808489925 |  |     |
| -0.2954090948 | -0.3401883945 |  | -0.3610031299 |  | -0.3538298375 |  | -0.2783841019 |  |     |
| -0.2849419583 |               |  |               |  |               |  |               |  |     |
|               | 518           |  | 519           |  | 520           |  | 521           |  | 522 |
| 523           | 524           |  | 525           |  | 526           |  | 527           |  | 528 |
| -0.2502338562 | -0.1654351417 |  | -0.1664715005 |  | -0.1738126819 |  | -0.1106494529 |  |     |
| -0.0500615565 | -0.0781016089 |  | -0.0206273257 |  | -0.0125594328 |  | -0.0069371962 |  |     |
| 0.1154733157  |               |  |               |  |               |  |               |  |     |
|               | 529           |  | 530           |  | 531           |  | 532           |  | 533 |
| 534           | 535           |  | 536           |  | 537           |  | 538           |  | 539 |
| 0.1159078363  | 0.0752803640  |  | 0.1116238033  |  | 0.0221671993  |  | 0.0341784434  |  |     |
| 0.1163018312  | 0.1517072078  |  | 0.1672120146  |  | 0.0571927312  |  | 0.1771054752  |  |     |
| 0.1146708827  |               |  |               |  |               |  |               |  |     |
|               | 540           |  | 541           |  | 542           |  | 543           |  | 544 |
| 545           | 546           |  | 547           |  | 548           |  | 549           |  | 550 |
| 0.0363417246  | 0.0829383602  |  | -0.0188021525 |  | -0.1332410026 |  | -0.2103245178 |  |     |
| -0.1783745655 | -0.2440954818 |  | -0.3029450060 |  | -0.3004659060 |  | -0.3009262267 |  |     |
| -0.2073828180 |               |  |               |  |               |  |               |  |     |
|               | 551           |  | 552           |  | 553           |  | 554           |  | 555 |
| 556           | 557           |  | 558           |  | 559           |  | 560           |  | 561 |
| -0.2299325874 | -0.0854479100 |  | 0.0549033382  |  | 0.0162237024  |  | 0.1762774654  |  |     |
| 0.1004254300  | 0.1419352329  |  | 0.1212391096  |  | 0.1127250155  |  | 0.1096963795  |  |     |
| 0.1109239927  |               |  |               |  |               |  |               |  |     |
|               | 562           |  | 563           |  | 564           |  | 565           |  | 566 |
| 567           | 568           |  |               |  |               |  |               |  |     |
| 0.1062661633  | 0.1190881896  |  | 0.1087333223  |  | 0.0969228878  |  | 0.0792567961  |  |     |
| 0.0757942502  | 0.1001905612  |  |               |  |               |  |               |  |     |

Q5NAT0\_40.1ns (MATRIX)

|             |             |  |             |  |             |  |             |  |             |  |    |
|-------------|-------------|--|-------------|--|-------------|--|-------------|--|-------------|--|----|
|             | 1           |  | 2           |  | 3           |  | 4           |  | 5           |  | 6  |
|             | 7           |  | 8           |  | 9           |  | 10          |  | 11          |  | 12 |
| 0.632957473 | 1.000000000 |  | 0.780791303 |  | 0.681673522 |  | 0.675510072 |  | 0.621155311 |  |    |
| 0.555590245 | 0.519326855 |  | 0.508837183 |  | 0.454248597 |  | 0.370478297 |  | 0.391840364 |  |    |
|             | 13          |  | 14          |  | 15          |  | 16          |  | 17          |  | 18 |
|             | 19          |  | 20          |  | 21          |  | 22          |  | 23          |  | 24 |

Supplementary Text 9

|              |              |              |              |              |              |
|--------------|--------------|--------------|--------------|--------------|--------------|
| 0.351565519  | 0.279935346  | 0.258712976  | 0.277253982  | 0.210776570  | 0.156529699  |
| 0.107157946  | 0.091278814  | 0.123281973  | 0.150038603  | 0.134542982  | 0.123313754  |
| 25           | 26           | 27           | 28           | 29           | 30           |
| 31           | 32           | 33           | 34           | 35           | 36           |
| 0.166595448  | 0.216149747  | 0.263832475  | 0.282453852  | 0.282252008  | 0.234916563  |
| 0.203292727  | 0.180663657  | 0.146383775  | 0.135083070  | 0.097281661  | 0.049321459  |
| 37           | 38           | 39           | 40           | 41           | 42           |
| 43           | 44           | 45           | 46           | 47           | 48           |
| 0.021650227  | 0.002297939  | -0.053843984 | -0.049147698 | -0.064674922 | -0.102226284 |
| -0.087010132 | -0.097511209 | -0.058316302 | -0.049894872 | 0.011126795  | 0.032376361  |
| 49           | 50           | 51           | 52           | 53           | 54           |
| 55           | 56           | 57           | 58           | 59           | 60           |
| 0.035389059  | 0.101223336  | 0.102024391  | 0.098969777  | 0.114758084  | 0.150885407  |
| 0.118819797  | 0.087050984  | 0.031847894  | 0.006915792  | -0.047844030 | -0.106336804 |
| 61           | 62           | 63           | 64           | 65           | 66           |
| 67           | 68           | 69           | 70           | 71           | 72           |
| -0.133259428 | -0.032499106 | -0.019436068 | -0.104475106 | -0.058171513 | 0.036151609  |
| -0.025173937 | -0.070707395 | 0.040089690  | 0.074933277  | -0.014907316 | 0.006486512  |
| 73           | 74           | 75           | 76           | 77           | 78           |
| 79           | 80           | 81           | 82           | 83           | 84           |
| 0.114680803  | 0.073854124  | 0.026270161  | 0.069719580  | 0.178113108  | 0.198726223  |
| 0.259751301  | 0.376485043  | 0.332417532  | 0.282221622  | 0.353624599  | 0.410969572  |
| 85           | 86           | 87           | 88           | 89           | 90           |
| 91           | 92           | 93           | 94           | 95           | 96           |
| 0.339354962  | 0.308317423  | 0.223988897  | 0.191332274  | 0.211170742  | 0.161573155  |
| 0.097879948  | 0.101363017  | 0.110820507  | 0.030799064  | 0.014331864  | 0.038581475  |
| 97           | 98           | 99           | 100          | 101          | 102          |
| 103          | 104          | 105          | 106          | 107          | 108          |
| -0.011005326 | -0.073394979 | -0.048603646 | -0.057108032 | -0.132732512 | -0.130564909 |
| -0.114894397 | -0.150974154 | -0.203515325 | -0.159538040 | -0.221626987 | -0.238040027 |
| 109          | 110          | 111          | 112          | 113          | 114          |
| 115          | 116          | 117          | 118          | 119          | 120          |
| -0.294956528 | -0.269378328 | -0.226963843 | -0.183934589 | -0.135041967 | -0.102950414 |
| -0.053507300 | -0.018449935 | -0.018508956 | 0.002170976  | 0.045241796  | 0.047980719  |
| 121          | 122          | 123          | 124          | 125          | 126          |
| 127          | 128          | 129          | 130          | 131          | 132          |
| 0.065222177  | 0.078593126  | 0.098316033  | 0.119581266  | 0.149086487  | 0.153205439  |
| 0.170430461  | 0.146054228  | 0.160069469  | 0.144734298  | 0.100204793  | 0.079386591  |
| 133          | 134          | 135          | 136          | 137          | 138          |
| 139          | 140          | 141          | 142          | 143          | 144          |
| 0.049787880  | -0.006298146 | -0.029350969 | -0.086928280 | -0.113402332 | -0.154268344 |
| -0.213880719 | -0.239846598 | -0.295905821 | -0.351599703 | -0.286829904 | -0.306370102 |
| 145          | 146          | 147          | 148          | 149          | 150          |
| 151          | 152          | 153          | 154          | 155          | 156          |
| -0.357254064 | -0.368099302 | -0.384838154 | -0.301864818 | -0.307755326 | -0.367512413 |
| -0.374659542 | -0.274206293 | -0.262737164 | -0.327542239 | -0.293777108 | -0.200439305 |
| 157          | 158          | 159          | 160          | 161          | 162          |
| 163          | 164          | 165          | 166          | 167          | 168          |
| -0.227269809 | -0.253645380 | -0.150315513 | -0.115185734 | -0.179501368 | -0.142258100 |
| -0.061164110 | -0.099254015 | -0.125729823 | -0.059875844 | -0.038571668 | -0.076101819 |
| 169          | 170          | 171          | 172          | 173          | 174          |
| 175          | 176          | 177          | 178          | 179          | 180          |
| -0.143089896 | -0.126362620 | -0.106333231 | -0.167721468 | -0.223096534 | -0.225972906 |
| -0.227823293 | -0.273507599 | -0.316017574 | -0.327226021 | -0.337884589 | -0.364063973 |

Supplementary Text 9

| 181          | 182          | 183          | 184          | 185          | 186          |
|--------------|--------------|--------------|--------------|--------------|--------------|
| 187          | 188          | 189          | 190          | 191          | 192          |
| -0.384993576 | -0.381915582 | -0.406056847 | -0.412735697 | -0.414098239 | -0.419741448 |
| -0.408652948 | -0.385738724 | -0.399646533 | -0.405893295 | -0.363558070 | -0.329277273 |
| 193          | 194          | 195          | 196          | 197          | 198          |
| 199          | 200          | 201          | 202          | 203          | 204          |
| -0.249644667 | -0.266817226 | -0.280625415 | -0.226300430 | -0.177492181 | -0.180253741 |
| -0.194738809 | -0.164852997 | -0.114067872 | -0.101141940 | -0.088233044 | -0.115814848 |
| 205          | 206          | 207          | 208          | 209          | 210          |
| 211          | 212          | 213          | 214          | 215          | 216          |
| -0.107053426 | -0.119374016 | -0.172708521 | -0.230258681 | -0.261102068 | -0.337780799 |
| -0.378103463 | -0.368722863 | -0.338121640 | -0.400661853 | -0.371032377 | -0.322325299 |
| 217          | 218          | 219          | 220          | 221          | 222          |
| 223          | 224          | 225          | 226          | 227          | 228          |
| -0.375490149 | -0.378811280 | -0.308727810 | -0.278430721 | -0.319677218 | -0.294290927 |
| -0.208443960 | -0.219059230 | -0.235386120 | -0.267056730 | -0.280494088 | -0.333681968 |
| 229          | 230          | 231          | 232          | 233          | 234          |
| 235          | 236          | 237          | 238          | 239          | 240          |
| -0.365922955 | -0.346870259 | -0.374695938 | -0.381148047 | -0.376400140 | -0.344643246 |
| -0.337777285 | -0.340870387 | -0.356121705 | -0.315719881 | -0.267931228 | -0.286256914 |
| 241          | 242          | 243          | 244          | 245          | 246          |
| 247          | 248          | 249          | 250          | 251          | 252          |
| -0.239387435 | -0.247778939 | -0.206128790 | -0.218130866 | -0.213470830 | -0.200170071 |
| -0.140321490 | -0.110739827 | -0.083167023 | -0.015911113 | -0.072323254 | -0.052413795 |
| 253          | 254          | 255          | 256          | 257          | 258          |
| 259          | 260          | 261          | 262          | 263          | 264          |
| -0.123002812 | -0.147527981 | -0.197552556 | -0.220763874 | -0.256653483 | -0.184145459 |
| -0.162271691 | -0.251095715 | -0.238176543 | -0.156065599 | -0.187918414 | -0.249835960 |
| 265          | 266          | 267          | 268          | 269          | 270          |
| 271          | 272          | 273          | 274          | 275          | 276          |
| -0.187927307 | -0.157958307 | -0.219747965 | -0.216230055 | -0.164260523 | -0.164910137 |
| -0.205800613 | -0.243933468 | -0.234211663 | -0.284018344 | -0.270565257 | -0.252792778 |
| 277          | 278          | 279          | 280          | 281          | 282          |
| 283          | 284          | 285          | 286          | 287          | 288          |
| -0.285827802 | -0.286743061 | -0.310186334 | -0.286884859 | -0.249475969 | -0.270107953 |
| -0.268060651 | -0.215609478 | -0.210908835 | -0.213276195 | -0.167515372 | -0.126246925 |
| 289          | 290          | 291          | 292          | 293          | 294          |
| 295          | 296          | 297          | 298          | 299          | 300          |
| -0.144174196 | -0.099633790 | -0.035492037 | -0.054239073 | -0.057006483 | 0.025558350  |
| 0.030663772  | -0.017278552 | -0.075885790 | -0.137255519 | -0.162451270 | -0.155765292 |
| 301          | 302          | 303          | 304          | 305          | 306          |
| 307          | 308          | 309          | 310          | 311          | 312          |
| -0.111001803 | -0.056219102 | -0.021033824 | 0.020104285  | 0.114084857  | 0.173927964  |
| 0.172366543  | 0.223732521  | 0.206222281  | 0.212645423  | 0.139783181  | 0.088893269  |
| 313          | 314          | 315          | 316          | 317          | 318          |
| 319          | 320          | 321          | 322          | 323          | 324          |
| 0.029115052  | 0.039172115  | 0.118369584  | 0.114810428  | 0.171707454  | 0.175722166  |
| 0.265344906  | 0.191855068  | 0.112598593  | 0.199687606  | 0.254525415  | 0.124249488  |
| 325          | 326          | 327          | 328          | 329          | 330          |
| 331          | 332          | 333          | 334          | 335          | 336          |
| 0.086870997  | 0.193042722  | 0.206731242  | 0.072055286  | 0.093754466  | 0.171434407  |
| 0.092317060  | 0.019458743  | 0.078554318  | 0.069833575  | 0.010185424  | -0.034169886 |
| 337          | 338          | 339          | 340          | 341          | 342          |
| 343          | 344          | 345          | 346          | 347          | 348          |

Supplementary Text 9

|              |              |              |              |              |              |
|--------------|--------------|--------------|--------------|--------------|--------------|
| -0.090301325 | -0.049791320 | -0.028055620 | 0.009179381  | -0.052103531 | -0.062752691 |
| -0.096877024 | -0.125559517 | -0.110738941 | -0.053827211 | 0.010959756  | 0.020836450  |
| 349          | 350          | 351          | 352          | 353          | 354          |
| 355          | 356          | 357          | 358          | 359          | 360          |
| 0.048608922  | 0.077901760  | 0.066534748  | 0.053445845  | 0.087084061  | 0.147062569  |
| 0.140840061  | 0.130957881  | 0.208056066  | 0.250717532  | 0.228874439  | 0.268597319  |
| 361          | 362          | 363          | 364          | 365          | 366          |
| 367          | 368          | 369          | 370          | 371          | 372          |
| 0.364159589  | 0.373051764  | 0.337324626  | 0.424243119  | 0.514954658  | 0.440554218  |
| 0.417334734  | 0.523143003  | 0.537705826  | 0.560156069  | 0.481397925  | 0.430770398  |
| 373          | 374          | 375          | 376          | 377          | 378          |
| 379          | 380          | 381          | 382          | 383          | 384          |
| 0.363080462  | 0.349070921  | 0.448263549  | 0.492460387  | 0.426423496  | 0.444069376  |
| 0.429600456  | 0.429121981  | 0.466670994  | 0.444132322  | 0.385526540  | 0.351083960  |
| 385          | 386          | 387          | 388          | 389          | 390          |
| 391          | 392          | 393          | 394          | 395          | 396          |
| 0.398464988  | 0.353672413  | 0.328484847  | 0.311561225  | 0.302532407  | 0.249498345  |
| 0.218721681  | 0.195571068  | 0.212010102  | 0.263726233  | 0.247943734  | 0.215573213  |
| 397          | 398          | 399          | 400          | 401          | 402          |
| 403          | 404          | 405          | 406          | 407          | 408          |
| 0.187712979  | 0.162967996  | 0.144918542  | 0.120192850  | 0.138191542  | 0.167184040  |
| 0.201094483  | 0.200590247  | 0.224228693  | 0.250605748  | 0.291192103  | 0.289300565  |
| 409          | 410          | 411          | 412          | 413          | 414          |
| 415          | 416          | 417          | 418          | 419          | 420          |
| 0.265039607  | 0.276337060  | 0.303434390  | 0.320741410  | 0.394271103  | 0.418189637  |
| 0.363142301  | 0.376487019  | 0.342758494  | 0.280725342  | 0.308931166  | 0.275522599  |
| 421          | 422          | 423          | 424          | 425          | 426          |
| 427          | 428          | 429          | 430          | 431          | 432          |
| 0.185473122  | 0.135638631  | 0.193523364  | 0.246233963  | 0.294003346  | 0.305690171  |
| 0.317916412  | 0.308964917  | 0.267351920  | 0.231324306  | 0.181511015  | 0.178216500  |
| 433          | 434          | 435          | 436          | 437          | 438          |
| 439          | 440          | 441          | 442          | 443          | 444          |
| 0.173398353  | 0.159033190  | 0.249246675  | 0.285578874  | 0.247461423  | 0.285943300  |
| 0.209337848  | 0.222851162  | 0.181952428  | 0.285985280  | 0.332035772  | 0.224812511  |
| 445          | 446          | 447          | 448          | 449          | 450          |
| 451          | 452          | 453          | 454          | 455          | 456          |
| 0.238408462  | 0.354596131  | 0.384490219  | 0.319540613  | 0.361961433  | 0.499568525  |
| 0.387801714  | 0.352164328  | 0.533344421  | 0.616707845  | 0.495225876  | 0.424817864  |
| 457          | 458          | 459          | 460          | 461          | 462          |
| 463          | 464          | 465          | 466          | 467          | 468          |
| 0.497971342  | 0.583581848  | 0.715364133  | 0.636932065  | 0.549594598  | 0.494915068  |
| 0.501723589  | 0.402233661  | 0.404433977  | 0.367132593  | 0.356416912  | 0.354928645  |
| 469          | 470          | 471          | 472          | 473          | 474          |
| 475          | 476          | 477          | 478          | 479          | 480          |
| 0.316851447  | 0.301704736  | 0.270693565  | 0.268680938  | 0.226697770  | 0.184717587  |
| 0.171539492  | 0.152396256  | 0.096897321  | 0.049731128  | 0.038553283  | -0.023202325 |
| 481          | 482          | 483          | 484          | 485          | 486          |
| 487          | 488          | 489          | 490          | 491          | 492          |
| 0.018280625  | -0.045295552 | -0.076496224 | -0.013508792 | -0.134546094 | -0.141199463 |
| -0.223258624 | -0.283508379 | -0.297979797 | -0.232132355 | -0.072076777 | -0.096803390 |
| 493          | 494          | 495          | 496          | 497          | 498          |
| 499          | 500          | 501          | 502          | 503          | 504          |
| 0.070016007  | 0.015730741  | 0.103661879  | 0.117094786  | 0.140998573  | 0.156754824  |
| 0.168098982  | 0.172854010  | 0.194853349  | 0.192834143  | 0.168978458  | 0.149753737  |



Supplementary Text 9

| 505          | 506          | 507          | 508          | 509          | 510          |
|--------------|--------------|--------------|--------------|--------------|--------------|
| 511          | 512          | 513          | 514          | 515          | 516          |
| 0.144122369  | 0.127581934  | 0.094896835  | 0.027822344  | 0.021532486  | -0.161342080 |
| -0.251346315 | -0.364889895 | -0.419054485 | -0.428536765 | -0.423748094 | -0.346706150 |
| 517          | 518          | 519          | 520          | 521          | 522          |
| 523          | 524          | 525          | 526          | 527          | 528          |
| -0.356764683 | -0.309141478 | -0.221563878 | -0.233922353 | -0.236559952 | -0.161621334 |
| -0.099712732 | -0.139429115 | -0.074133433 | -0.071223878 | -0.061197561 | 0.074937582  |
| 529          | 530          | 531          | 532          | 533          | 534          |
| 535          | 536          | 537          | 538          | 539          | 540          |
| 0.079630886  | 0.043472631  | 0.089679777  | 0.003149579  | 0.026167712  | 0.135269075  |
| 0.188659666  | 0.188411900  | 0.043331622  | 0.160404081  | 0.075417906  | -0.023873558 |
| 541          | 542          | 543          | 544          | 545          | 546          |
| 547          | 548          | 549          | 550          | 551          | 552          |
| 0.028712685  | -0.088028521 | -0.215172303 | -0.297289118 | -0.260724868 | -0.325483334 |
| -0.387257094 | -0.384647887 | -0.387405386 | -0.292915470 | -0.311897426 | -0.151695333 |
| 553          | 554          | 555          | 556          | 557          | 558          |
| 559          | 560          | 561          | 562          | 563          | 564          |
| 0.006910397  | -0.014072071 | 0.180755411  | 0.128586528  | 0.179990866  | 0.161407066  |
| 0.162602984  | 0.155460016  | 0.158936184  | 0.157074627  | 0.169184452  | 0.155502649  |
| 565          | 566          | 567          | 568          |              |              |
| 0.140709036  | 0.116334649  | 0.115547287  | 0.145995382  |              |              |

Q8LJP6\_40.1ns (DCCM)

| 1            | 2            | 3            | 4            | 5            |
|--------------|--------------|--------------|--------------|--------------|
| 6            | 7            | 8            | 9            | 10           |
| 1.000000e+00 | 3.756877e-01 | 3.051341e-01 | 2.813176e-01 | 2.839402e-01 |
| 2.463647e-01 | 2.008131e-01 | 1.953260e-01 | 1.850028e-01 | 1.407454e-01 |
| 1.142384e-01 |              |              |              |              |
| 12           | 13           | 14           | 15           | 16           |
| 17           | 18           | 19           | 20           | 21           |
| 1.296846e-01 | 1.158644e-01 | 9.283592e-02 | 8.634024e-02 | 8.469080e-02 |
| 6.547516e-02 | 5.461470e-02 | 4.748325e-02 | 4.573840e-02 | 3.489448e-02 |
| 3.135658e-02 |              |              |              |              |
| 23           | 24           | 25           | 26           | 27           |
| 28           | 29           | 30           | 31           | 32           |
| 1.995156e-02 | 2.545453e-02 | 3.755150e-02 | 5.678868e-02 | 6.162320e-02 |
| 6.990018e-02 | 5.372849e-02 | 4.652209e-02 | 3.700942e-02 | 3.842223e-02 |
| 3.763453e-02 |              |              |              |              |
| 34           | 35           | 36           | 37           | 38           |
| 39           | 40           | 41           | 42           | 43           |
| 4.267094e-02 | 4.339204e-02 | 3.701674e-02 | 3.119059e-02 | 3.337605e-02 |
| 2.584997e-02 | 2.256396e-02 | 2.122571e-02 | 1.687683e-02 | 1.022014e-02 |
| 1.124243e-02 |              |              |              |              |
| 45           | 46           | 47           | 48           | 49           |
| 50           | 51           | 52           | 53           | 54           |
| 1.897250e-02 | 2.219259e-02 | 2.943837e-02 | 3.196596e-02 | 3.090297e-02 |
| 4.795140e-02 | 5.286128e-02 | 5.240120e-02 | 6.579153e-02 | 6.497299e-02 |
| 5.082470e-02 |              |              |              |              |
| 56           | 57           | 58           | 59           | 60           |
| 61           | 62           | 63           | 64           | 65           |
| 4.646677e-02 | 3.979756e-02 | 3.953575e-02 | 2.439309e-02 | 1.401875e-02 |
| 5.809453e-03 | 1.710016e-02 | 2.395691e-02 | 4.132287e-03 | 2.214499e-03 |
| 66           |              |              |              |              |

Supplementary Text 9

|               |               |               |               |               |     |  |
|---------------|---------------|---------------|---------------|---------------|-----|--|
| 2.305351e-02  |               |               |               |               |     |  |
|               | 67            | 68            | 69            | 70            | 71  |  |
| 72            | 73            | 74            | 75            | 76            | 77  |  |
| 1.105043e-02  | -1.005194e-02 | 6.920353e-03  | 2.564262e-02  | 1.864894e-03  |     |  |
| -6.853321e-03 | 2.668691e-02  | 2.849843e-02  | -2.201454e-03 | 5.157428e-03  |     |  |
| 4.500466e-02  |               |               |               |               |     |  |
|               | 78            | 79            | 80            | 81            | 82  |  |
| 83            | 84            | 85            | 86            | 87            | 88  |  |
| 3.961389e-02  | 2.655847e-02  | 6.381039e-02  | 9.064321e-02  | 9.270224e-02  |     |  |
| 1.371886e-01  | 1.441667e-01  | 1.143287e-01  | 9.219117e-02  | 7.619052e-02  |     |  |
| 6.375467e-02  |               |               |               |               |     |  |
|               | 89            | 90            | 91            | 92            | 93  |  |
| 94            | 95            | 96            | 97            | 98            | 99  |  |
| 7.147588e-02  | 6.263187e-02  | 4.252797e-02  | 4.272043e-02  | 4.444989e-02  |     |  |
| 2.285215e-02  | 2.007438e-02  | 2.979132e-02  | 1.891204e-02  | 4.197268e-03  |     |  |
| 1.420420e-02  |               |               |               |               |     |  |
|               | 100           | 101           | 102           | 103           | 104 |  |
| 105           | 106           | 107           | 108           | 109           | 110 |  |
| 1.379039e-02  | -2.196925e-03 | -5.363446e-03 | 5.995367e-03  | 2.925459e-03  |     |  |
| -9.542362e-03 | -5.825331e-03 | -1.960382e-02 | -3.018572e-02 | -3.182264e-02 |     |  |
| -2.140301e-02 |               |               |               |               |     |  |
|               | 111           | 112           | 113           | 114           | 115 |  |
| 116           | 117           | 118           | 119           | 120           | 121 |  |
| -1.514398e-02 | 4.247048e-03  | 1.010819e-02  | 2.281212e-02  | 3.417266e-02  |     |  |
| 3.920471e-02  | 4.045248e-02  | 3.389890e-02  | 3.193764e-02  | 4.231474e-02  |     |  |
| 4.595643e-02  |               |               |               |               |     |  |
|               | 122           | 123           | 124           | 125           | 126 |  |
| 127           | 128           | 129           | 130           | 131           | 132 |  |
| 4.410349e-02  | 3.838215e-02  | 4.445907e-02  | 4.328313e-02  | 4.002155e-02  |     |  |
| 4.197530e-02  | 4.517043e-02  | 4.516489e-02  | 4.015177e-02  | 4.465571e-02  |     |  |
| 3.650440e-02  |               |               |               |               |     |  |
|               | 133           | 134           | 135           | 136           | 137 |  |
| 138           | 139           | 140           | 141           | 142           | 143 |  |
| 4.113151e-02  | 3.395648e-02  | 3.832102e-02  | 3.154238e-02  | 2.898179e-02  |     |  |
| 1.546762e-02  | 3.173858e-04  | -1.676036e-02 | -1.896651e-02 | -2.166285e-02 |     |  |
| -1.107008e-02 |               |               |               |               |     |  |
|               | 144           | 145           | 146           | 147           | 148 |  |
| 149           | 150           | 151           | 152           | 153           | 154 |  |
| -1.957446e-02 | -3.737745e-02 | -4.773214e-02 | -5.485226e-02 | -4.498385e-02 |     |  |
| -2.598304e-02 | -4.173912e-02 | -6.143511e-02 | -3.893235e-02 | -2.777644e-02 |     |  |
| -5.372692e-02 |               |               |               |               |     |  |
|               | 155           | 156           | 157           | 158           | 159 |  |
| 160           | 161           | 162           | 163           | 164           | 165 |  |
| -5.672413e-02 | -2.817184e-02 | -3.288183e-02 | -5.577529e-02 | -3.893827e-02 |     |  |
| -2.163386e-02 | -3.955605e-02 | -4.111086e-02 | -2.221457e-02 | -1.864589e-02 |     |  |
| -3.432060e-02 |               |               |               |               |     |  |
|               | 166           | 167           | 168           | 169           | 170 |  |
| 171           | 172           | 173           | 174           | 175           | 176 |  |
| -2.235811e-02 | -1.231566e-02 | -1.124004e-02 | -1.899180e-02 | -1.077853e-02 |     |  |
| -1.346349e-02 | -3.091251e-02 | -3.755674e-02 | -2.809461e-02 | -3.255694e-02 |     |  |
| -5.344580e-02 |               |               |               |               |     |  |
|               | 177           | 178           | 179           | 180           | 181 |  |
| 182           | 183           | 184           | 185           | 186           | 187 |  |
| -4.700609e-02 | -4.027553e-02 | -5.611991e-02 | -6.784480e-02 | -5.897240e-02 |     |  |

Supplementary Text 9

|               |               |               |               |               |     |  |
|---------------|---------------|---------------|---------------|---------------|-----|--|
| -5.420346e-02 | -7.243510e-02 | -6.965796e-02 | -5.692029e-02 | -6.593589e-02 |     |  |
| -6.704017e-02 |               |               |               |               |     |  |
|               | 188           | 189           | 190           | 191           | 192 |  |
| 193           | 194           | 195           | 196           | 197           | 198 |  |
| -5.620094e-02 | -5.076671e-02 | -4.866351e-02 | -3.607898e-02 | -2.543899e-02 |     |  |
| -1.287727e-02 | -8.038187e-03 | -8.512831e-03 | 8.243597e-04  | 6.517083e-03  |     |  |
| 1.690148e-02  |               |               |               |               |     |  |
|               | 199           | 200           | 201           | 202           | 203 |  |
| 204           | 205           | 206           | 207           | 208           | 209 |  |
| 1.817608e-02  | 6.212519e-03  | 7.331635e-03  | 7.855464e-03  | 5.704904e-03  |     |  |
| -8.744125e-03 | -1.984550e-02 | -3.003743e-02 | -4.563782e-02 | -5.356778e-02 |     |  |
| -5.454525e-02 |               |               |               |               |     |  |
|               | 210           | 211           | 212           | 213           | 214 |  |
| 215           | 216           | 217           | 218           | 219           | 220 |  |
| -6.394654e-02 | -7.537551e-02 | -6.871920e-02 | -8.205446e-02 | -9.623305e-02 |     |  |
| -8.277904e-02 | -8.438893e-02 | -1.042993e-01 | -1.027143e-01 | -8.460202e-02 |     |  |
| -8.776239e-02 |               |               |               |               |     |  |
|               | 221           | 222           | 223           | 224           | 225 |  |
| 226           | 227           | 228           | 229           | 230           | 231 |  |
| -9.694247e-02 | -8.666315e-02 | -7.154352e-02 | -7.055312e-02 | -7.079865e-02 |     |  |
| -7.757101e-02 | -9.861802e-02 | -9.678600e-02 | -9.422675e-02 | -1.011535e-01 |     |  |
| -1.053966e-01 |               |               |               |               |     |  |
|               | 232           | 233           | 234           | 235           | 236 |  |
| 237           | 238           | 239           | 240           | 241           | 242 |  |
| -9.888944e-02 | -1.077153e-01 | -1.072529e-01 | -8.494805e-02 | -8.627287e-02 |     |  |
| -8.675406e-02 | -8.665736e-02 | -8.800010e-02 | -8.007394e-02 | -7.379456e-02 |     |  |
| -8.144044e-02 |               |               |               |               |     |  |
|               | 243           | 244           | 245           | 246           | 247 |  |
| 248           | 249           | 250           | 251           | 252           | 253 |  |
| -9.547709e-02 | -9.647851e-02 | -8.543417e-02 | -7.040294e-02 | -6.672841e-02 |     |  |
| -4.203281e-02 | -3.734461e-02 | -3.210719e-02 | -1.091263e-02 | -1.124838e-02 |     |  |
| -1.826417e-02 |               |               |               |               |     |  |
|               | 254           | 255           | 256           | 257           | 258 |  |
| 259           | 260           | 261           | 262           | 263           | 264 |  |
| -4.200634e-02 | -5.001815e-02 | -7.267475e-02 | -6.829950e-02 | -5.567347e-02 |     |  |
| -7.410493e-02 | -9.592393e-02 | -8.839830e-02 | -8.251888e-02 | -1.032754e-01 |     |  |
| -1.105648e-01 |               |               |               |               |     |  |
|               | 265           | 266           | 267           | 268           | 269 |  |
| 270           | 271           | 272           | 273           | 274           | 275 |  |
| -9.844241e-02 | -1.006867e-01 | -1.122829e-01 | -1.103605e-01 | -9.515240e-02 |     |  |
| -8.957223e-02 | -1.049889e-01 | -9.011017e-02 | -7.356246e-02 | -1.029350e-01 |     |  |
| -1.058856e-01 |               |               |               |               |     |  |
|               | 276           | 277           | 278           | 279           | 280 |  |
| 281           | 282           | 283           | 284           | 285           | 286 |  |
| -1.153073e-01 | -1.143950e-01 | -1.154671e-01 | -1.258869e-01 | -1.239791e-01 |     |  |
| -1.216942e-01 | -1.154434e-01 | -1.090043e-01 | -1.068236e-01 | -9.228566e-02 |     |  |
| -8.055656e-02 |               |               |               |               |     |  |
|               | 287           | 288           | 289           | 290           | 291 |  |
| 292           | 293           | 294           | 295           | 296           | 297 |  |
| -7.702766e-02 | -7.003494e-02 | -5.331043e-02 | -3.681465e-02 | -3.527791e-02 |     |  |
| -3.151117e-02 | -7.978821e-03 | 4.521203e-03  | -1.486403e-03 | 5.348265e-03  |     |  |
| -3.887882e-03 |               |               |               |               |     |  |
|               | 298           | 299           | 300           | 301           | 302 |  |
| 303           | 304           | 305           | 306           | 307           | 308 |  |

Supplementary Text 9

|               |               |               |               |               |     |
|---------------|---------------|---------------|---------------|---------------|-----|
| -1.689639e-02 | -2.570619e-02 | -1.650761e-02 | -1.257935e-02 | 1.770281e-02  |     |
| 5.255806e-02  | 7.628967e-02  | 7.366350e-02  | 8.534712e-02  | 9.893609e-02  |     |
| 8.997747e-02  |               |               |               |               |     |
|               | 309           | 310           | 311           | 312           | 313 |
| 314           | 315           | 316           | 317           | 318           | 319 |
| 6.059722e-02  | 3.979560e-02  | 1.488959e-02  | 3.046133e-03  | 2.722923e-02  |     |
| 3.737814e-02  | 6.329930e-02  | 7.519584e-02  | 1.024042e-01  | 6.928949e-02  |     |
| 4.887768e-02  |               |               |               |               |     |
|               | 320           | 321           | 322           | 323           | 324 |
| 325           | 326           | 327           | 328           | 329           | 330 |
| 7.828961e-02  | 8.844304e-02  | 5.132316e-02  | 3.712183e-02  | 5.472511e-02  |     |
| 3.866185e-02  | 1.089919e-03  | 5.505733e-03  | 1.010025e-02  | -1.700443e-02 |     |
| -4.098225e-02 |               |               |               |               |     |
|               | 331           | 332           | 333           | 334           | 335 |
| 336           | 337           | 338           | 339           | 340           | 341 |
| -3.944685e-02 | -3.644848e-02 | -6.012777e-02 | -7.757469e-02 | -9.671350e-02 |     |
| -1.147528e-01 | -1.104425e-01 | -1.127237e-01 | -1.190783e-01 | -1.165679e-01 |     |
| -1.010264e-01 |               |               |               |               |     |
|               | 342           | 343           | 344           | 345           | 346 |
| 347           | 348           | 349           | 350           | 351           | 352 |
| -8.994159e-02 | -8.621468e-02 | -9.952154e-02 | -9.857879e-02 | -9.802249e-02 |     |
| -1.015961e-01 | -8.935691e-02 | -5.362838e-02 | -3.531915e-02 | -8.894308e-03 |     |
| 7.676063e-03  |               |               |               |               |     |
|               | 353           | 354           | 355           | 356           | 357 |
| 358           | 359           | 360           | 361           | 362           | 363 |
| 1.761005e-02  | 4.284853e-02  | 6.711510e-02  | 8.332762e-02  | 1.179977e-01  |     |
| 1.682075e-01  | 1.707747e-01  | 1.731626e-01  | 2.493586e-01  | 3.545127e-01  |     |
| 2.487148e-01  |               |               |               |               |     |
|               | 364           | 365           | 366           | 367           | 368 |
| 369           | 370           | 371           | 372           | 373           | 374 |
| 2.671918e-01  | 4.071857e-01  | 3.998022e-01  | 3.713057e-01  | 2.579027e-01  |     |
| 1.581557e-01  | 1.165084e-01  | 1.793823e-01  | 1.923587e-01  | 2.820303e-01  |     |
| 2.126232e-01  |               |               |               |               |     |
|               | 375           | 376           | 377           | 378           | 379 |
| 380           | 381           | 382           | 383           | 384           | 385 |
| 2.020764e-01  | 1.782686e-01  | 1.908962e-01  | 2.117517e-01  | 3.171810e-01  |     |
| 2.619272e-01  | 1.998549e-01  | 2.007018e-01  | 1.370574e-01  | 1.160459e-01  |     |
| 1.077089e-01  |               |               |               |               |     |
|               | 386           | 387           | 388           | 389           | 390 |
| 391           | 392           | 393           | 394           | 395           | 396 |
| 8.722911e-02  | 7.139656e-02  | 6.560370e-02  | 5.317671e-02  | 4.686183e-02  |     |
| 5.327301e-02  | 3.886067e-02  | 1.519265e-02  | -1.635619e-02 | -3.193623e-02 |     |
| -2.488663e-02 |               |               |               |               |     |
|               | 397           | 398           | 399           | 400           | 401 |
| 402           | 403           | 404           | 405           | 406           | 407 |
| -8.049898e-03 | 1.069118e-02  | 2.688963e-02  | 3.270168e-02  | 2.738873e-02  |     |
| 3.289341e-02  | 4.743014e-02  | 7.994259e-02  | 6.929158e-02  | 4.745067e-02  |     |
| 7.251404e-02  |               |               |               |               |     |
|               | 408           | 409           | 410           | 411           | 412 |
| 413           | 414           | 415           | 416           | 417           | 418 |
| 8.173474e-02  | 1.040725e-01  | 1.519927e-01  | 1.538353e-01  | 1.316222e-01  |     |
| 1.353050e-01  | 1.279672e-01  | 1.097424e-01  | 1.240339e-01  | 9.139154e-02  |     |
| 6.140114e-02  |               |               |               |               |     |
|               | 419           | 420           | 421           | 422           | 423 |

Supplementary Text 9

|               |               |               |               |               |     |
|---------------|---------------|---------------|---------------|---------------|-----|
| 424           | 425           | 426           | 427           | 428           | 429 |
| 4.522289e-02  | 5.962538e-02  | 8.854426e-02  | 8.066295e-02  | 1.062364e-01  |     |
| 1.153831e-01  | 1.121741e-01  | 8.464467e-02  | 7.713196e-02  | 4.911230e-02  |     |
| 4.240698e-02  |               |               |               |               |     |
|               | 430           | 431           | 432           | 433           | 434 |
| 435           | 436           | 437           | 438           | 439           | 440 |
| 4.111949e-02  | 4.157442e-02  | 7.607748e-02  | 9.709956e-02  | 8.437628e-02  |     |
| 9.662887e-02  | 7.059279e-02  | 6.348465e-02  | 4.796775e-02  | 7.828766e-02  |     |
| 8.816183e-02  |               |               |               |               |     |
|               | 441           | 442           | 443           | 444           | 445 |
| 446           | 447           | 448           | 449           | 450           | 451 |
| 6.078087e-02  | 6.466614e-02  | 1.028608e-01  | 1.054520e-01  | 8.106619e-02  |     |
| 1.034918e-01  | 1.613376e-01  | 1.358761e-01  | 9.961699e-02  | 1.340770e-01  |     |
| 2.041424e-01  |               |               |               |               |     |
|               | 452           | 453           | 454           | 455           | 456 |
| 457           | 458           | 459           | 460           | 461           | 462 |
| 2.328640e-01  | 2.022290e-01  | 2.548492e-01  | 3.063049e-01  | 3.180887e-01  |     |
| 2.193291e-01  | 1.930339e-01  | 1.324324e-01  | 9.959273e-02  | 9.216680e-02  |     |
| 8.391641e-02  |               |               |               |               |     |
|               | 463           | 464           | 465           | 466           | 467 |
| 468           | 469           | 470           | 471           | 472           | 473 |
| 7.524850e-02  | 5.324734e-02  | 2.905143e-02  | 6.645036e-02  | -2.307607e-02 |     |
| -3.679062e-02 | -8.328504e-02 | -9.165274e-02 | -9.165938e-02 | -1.111190e-01 |     |
| -1.387374e-01 |               |               |               |               |     |
|               | 474           | 475           | 476           | 477           | 478 |
| 479           | 480           | 481           | 482           | 483           | 484 |
| -1.654519e-01 | -1.559327e-01 | -1.668429e-01 | -1.784567e-01 | -1.737778e-01 |     |
| -1.546103e-01 | -1.453910e-01 | -1.578642e-01 | -1.350418e-01 | -1.258502e-01 |     |
| -8.995162e-02 |               |               |               |               |     |
|               | 485           | 486           | 487           | 488           | 489 |
| 490           | 491           | 492           | 493           | 494           | 495 |
| -9.727712e-02 | -1.391350e-01 | -1.327844e-01 | -1.529312e-01 | -1.343760e-01 |     |
| -1.004068e-01 | -9.639531e-02 | -6.167257e-02 | -8.467834e-02 | -1.257075e-02 |     |
| -2.550058e-02 |               |               |               |               |     |
|               | 496           | 497           | 498           | 499           | 500 |
| 501           | 502           | 503           | 504           | 505           | 506 |
| -2.538191e-02 | -1.678797e-02 | -7.079531e-03 | 9.788194e-03  | 1.388352e-02  |     |
| 1.451376e-02  | 3.121453e-02  | 3.627683e-02  | 6.561164e-02  | 3.602114e-02  |     |
| 3.575864e-02  |               |               |               |               |     |
|               | 507           | 508           | 509           | 510           | 511 |
| 512           | 513           | 514           | 515           | 516           | 517 |
| -2.924876e-05 | -6.359139e-02 | -1.172628e-01 | -1.563019e-01 | -1.722818e-01 |     |
| -1.551065e-01 | -1.490317e-01 | -1.075285e-01 | -8.676127e-02 | -5.155894e-02 |     |
| -1.972103e-02 |               |               |               |               |     |
|               | 518           | 519           | 520           | 521           | 522 |
| 523           | 524           | 525           | 526           | 527           | 528 |
| -3.917566e-02 | -4.560306e-02 | -1.082023e-02 | -3.046762e-02 | -3.371139e-02 |     |
| -7.093562e-02 | -8.484247e-02 | -9.437093e-02 | -9.410987e-02 | -1.021625e-01 |     |
| -6.892711e-02 |               |               |               |               |     |
|               | 529           | 530           | 531           | 532           | 533 |
| 534           | 535           | 536           | 537           | 538           | 539 |
| -3.981689e-02 | -3.037709e-02 | -2.167015e-02 | -6.226678e-02 | -5.464463e-02 |     |
| -1.084990e-02 | 6.903506e-03  | -2.615637e-02 | -6.399676e-02 | -5.790475e-02 |     |
| -8.559072e-02 |               |               |               |               |     |

Supplementary Text 9

|               |               |               |               |               |     |  |
|---------------|---------------|---------------|---------------|---------------|-----|--|
|               | 540           | 541           | 542           | 543           | 544 |  |
| 545           | 546           | 547           | 548           | 549           | 550 |  |
| -1.057671e-01 | -1.347286e-01 | -1.350893e-01 | -9.808617e-02 | -5.673727e-02 |     |  |
| -2.346654e-02 | 1.277309e-02  | -8.018811e-03 | 2.037657e-02  | 1.372177e-02  |     |  |
| 3.119660e-02  |               |               |               |               |     |  |
|               | 551           | 552           | 553           | 554           | 555 |  |
| 556           | 557           | 558           | 559           | 560           |     |  |
| 4.165989e-02  | 5.001075e-02  | 2.865809e-02  | 3.459682e-02  | 1.426707e-02  |     |  |
| -5.906036e-03 | 2.814051e-03  | -1.773102e-03 | 1.323819e-02  | 3.584996e-02  |     |  |

Q8LJP6\_40.1ns (MATRIX)

|              |               |              |              |              |    |  |
|--------------|---------------|--------------|--------------|--------------|----|--|
|              | 1             | 2            | 3            | 4            | 5  |  |
| 6            | 7             | 8            | 9            | 10           | 11 |  |
| 3.756877e-01 | 1.000000e+00  | 6.750240e-01 | 5.049690e-01 | 5.378412e-01 |    |  |
| 4.723403e-01 | 3.589065e-01  | 3.260511e-01 | 3.178642e-01 | 2.484844e-01 |    |  |
| 1.970019e-01 |               |              |              |              |    |  |
|              | 12            | 13           | 14           | 15           | 16 |  |
| 17           | 18            | 19           | 20           | 21           | 22 |  |
| 2.135084e-01 | 1.851675e-01  | 1.560327e-01 | 1.460189e-01 | 1.343538e-01 |    |  |
| 1.041519e-01 | 8.811994e-02  | 7.283652e-02 | 6.528366e-02 | 5.310920e-02 |    |  |
| 4.876003e-02 |               |              |              |              |    |  |
|              | 23            | 24           | 25           | 26           | 27 |  |
| 28           | 29            | 30           | 31           | 32           | 33 |  |
| 3.265918e-02 | 4.258812e-02  | 6.147619e-02 | 9.124125e-02 | 1.013295e-01 |    |  |
| 1.079879e-01 | 8.388582e-02  | 6.516361e-02 | 5.729681e-02 | 5.587254e-02 |    |  |
| 5.389585e-02 |               |              |              |              |    |  |
|              | 34            | 35           | 36           | 37           | 38 |  |
| 39           | 40            | 41           | 42           | 43           | 44 |  |
| 5.611806e-02 | 5.542197e-02  | 4.912262e-02 | 3.755160e-02 | 3.896819e-02 |    |  |
| 2.768018e-02 | 2.579500e-02  | 2.141806e-02 | 1.477219e-02 | 9.665382e-03 |    |  |
| 1.328579e-02 |               |              |              |              |    |  |
|              | 45            | 46           | 47           | 48           | 49 |  |
| 50           | 51            | 52           | 53           | 54           | 55 |  |
| 2.518415e-02 | 2.807565e-02  | 3.954018e-02 | 4.602975e-02 | 4.421463e-02 |    |  |
| 6.721463e-02 | 6.438703e-02  | 5.806309e-02 | 6.600290e-02 | 6.846874e-02 |    |  |
| 5.225698e-02 |               |              |              |              |    |  |
|              | 56            | 57           | 58           | 59           | 60 |  |
| 61           | 62            | 63           | 64           | 65           | 66 |  |
| 4.827316e-02 | 4.126806e-02  | 4.393847e-02 | 2.285760e-02 | 1.156434e-02 |    |  |
| 7.742309e-05 | 1.465107e-02  | 2.780880e-02 | 5.202967e-03 | 3.841601e-03 |    |  |
| 3.254963e-02 |               |              |              |              |    |  |
|              | 67            | 68           | 69           | 70           | 71 |  |
| 72           | 73            | 74           | 75           | 76           | 77 |  |
| 2.080810e-02 | -1.794989e-03 | 2.320620e-02 | 5.126610e-02 | 1.920557e-02 |    |  |
| 1.893094e-02 | 6.758772e-02  | 6.395544e-02 | 2.226110e-02 | 4.190120e-02 |    |  |
| 9.868913e-02 |               |              |              |              |    |  |
|              | 78            | 79           | 80           | 81           | 82 |  |
| 83           | 84            | 85           | 86           | 87           | 88 |  |
| 7.662634e-02 | 6.056320e-02  | 1.174644e-01 | 1.473673e-01 | 1.152414e-01 |    |  |
| 1.936955e-01 | 2.193803e-01  | 1.580268e-01 | 1.341275e-01 | 1.078235e-01 |    |  |
| 8.825538e-02 |               |              |              |              |    |  |
|              | 89            | 90           | 91           | 92           | 93 |  |

Supplementary Text 9

|               |               |               |               |               |     |
|---------------|---------------|---------------|---------------|---------------|-----|
| 94            | 95            | 96            | 97            | 98            | 99  |
| 1.057232e-01  | 9.853053e-02  | 6.908333e-02  | 6.710339e-02  | 7.106735e-02  |     |
| 4.260924e-02  | 3.786353e-02  | 4.796476e-02  | 3.260089e-02  | 1.392633e-02  |     |
| 2.488016e-02  |               |               |               |               |     |
|               | 100           | 101           | 102           | 103           | 104 |
| 105           | 106           | 107           | 108           | 109           | 110 |
| 2.115684e-02  | 9.795270e-04  | -6.923136e-04 | 1.186947e-02  | 5.824283e-03  |     |
| -1.010505e-02 | -6.428580e-03 | -2.244326e-02 | -3.620098e-02 | -4.125533e-02 |     |
| -3.049253e-02 |               |               |               |               |     |
|               | 111           | 112           | 113           | 114           | 115 |
| 116           | 117           | 118           | 119           | 120           | 121 |
| -2.161921e-02 | -5.019138e-04 | 7.764394e-03  | 2.010148e-02  | 3.462515e-02  |     |
| 3.893138e-02  | 3.973421e-02  | 3.160202e-02  | 2.968263e-02  | 4.223738e-02  |     |
| 4.716861e-02  |               |               |               |               |     |
|               | 122           | 123           | 124           | 125           | 126 |
| 127           | 128           | 129           | 130           | 131           | 132 |
| 4.586672e-02  | 3.993068e-02  | 4.720427e-02  | 4.399050e-02  | 4.052909e-02  |     |
| 4.399664e-02  | 4.985022e-02  | 5.127168e-02  | 4.312444e-02  | 4.977898e-02  |     |
| 3.948213e-02  |               |               |               |               |     |
|               | 133           | 134           | 135           | 136           | 137 |
| 138           | 139           | 140           | 141           | 142           | 143 |
| 4.313614e-02  | 3.399334e-02  | 3.951983e-02  | 2.975858e-02  | 2.776793e-02  |     |
| 7.940505e-03  | -7.786555e-03 | -2.929654e-02 | -3.005234e-02 | -3.459199e-02 |     |
| -2.274212e-02 |               |               |               |               |     |
|               | 144           | 145           | 146           | 147           | 148 |
| 149           | 150           | 151           | 152           | 153           | 154 |
| -3.605842e-02 | -5.629442e-02 | -6.567833e-02 | -7.591019e-02 | -6.418567e-02 |     |
| -3.806458e-02 | -5.403245e-02 | -7.686517e-02 | -4.911200e-02 | -3.233384e-02 |     |
| -6.118028e-02 |               |               |               |               |     |
|               | 155           | 156           | 157           | 158           | 159 |
| 160           | 161           | 162           | 163           | 164           | 165 |
| -6.412096e-02 | -2.657462e-02 | -3.046540e-02 | -5.567414e-02 | -3.538529e-02 |     |
| -1.422559e-02 | -3.626896e-02 | -3.798748e-02 | -1.487696e-02 | -1.272451e-02 |     |
| -3.216248e-02 |               |               |               |               |     |
|               | 166           | 167           | 168           | 169           | 170 |
| 171           | 172           | 173           | 174           | 175           | 176 |
| -2.125701e-02 | -8.378740e-03 | -6.851592e-03 | -1.574125e-02 | -5.850134e-03 |     |
| -8.150034e-03 | -2.765648e-02 | -3.633817e-02 | -2.572445e-02 | -2.968120e-02 |     |
| -5.496944e-02 |               |               |               |               |     |
|               | 177           | 178           | 179           | 180           | 181 |
| 182           | 183           | 184           | 185           | 186           | 187 |
| -4.878452e-02 | -4.150943e-02 | -6.078324e-02 | -7.591829e-02 | -6.672553e-02 |     |
| -6.322447e-02 | -8.650686e-02 | -8.349620e-02 | -7.107113e-02 | -8.448161e-02 |     |
| -8.574598e-02 |               |               |               |               |     |
|               | 188           | 189           | 190           | 191           | 192 |
| 193           | 194           | 195           | 196           | 197           | 198 |
| -7.275982e-02 | -7.019264e-02 | -7.101267e-02 | -5.774331e-02 | -4.310135e-02 |     |
| -2.771044e-02 | -2.589357e-02 | -2.545931e-02 | -1.177025e-02 | -4.472606e-03 |     |
| 8.906241e-03  |               |               |               |               |     |
|               | 199           | 200           | 201           | 202           | 203 |
| 204           | 205           | 206           | 207           | 208           | 209 |
| 9.655456e-03  | -8.235418e-03 | -9.008108e-03 | -5.894330e-03 | -8.113307e-03 |     |
| -2.623865e-02 | -3.886737e-02 | -5.087401e-02 | -7.018475e-02 | -7.859536e-02 |     |
| -7.860676e-02 |               |               |               |               |     |

Supplementary Text 9

|               | 210           | 211           | 212           | 213           | 214 |  |
|---------------|---------------|---------------|---------------|---------------|-----|--|
| 215           | 216           | 217           | 218           | 219           | 220 |  |
| -8.726153e-02 | -1.016209e-01 | -9.071406e-02 | -1.042633e-01 | -1.203439e-01 |     |  |
| -1.033204e-01 | -1.012352e-01 | -1.244889e-01 | -1.221350e-01 | -9.698819e-02 |     |  |
| -9.917254e-02 |               |               |               |               |     |  |
|               | 221           | 222           | 223           | 224           | 225 |  |
| 226           | 227           | 228           | 229           | 230           | 231 |  |
| -1.113866e-01 | -9.789411e-02 | -7.698222e-02 | -7.684302e-02 | -7.793090e-02 |     |  |
| -8.775063e-02 | -1.136230e-01 | -1.127004e-01 | -1.102183e-01 | -1.201722e-01 |     |  |
| -1.254663e-01 |               |               |               |               |     |  |
|               | 232           | 233           | 234           | 235           | 236 |  |
| 237           | 238           | 239           | 240           | 241           | 242 |  |
| -1.177651e-01 | -1.299749e-01 | -1.301452e-01 | -1.039549e-01 | -1.071897e-01 |     |  |
| -1.070013e-01 | -1.073314e-01 | -1.112483e-01 | -1.028579e-01 | -9.601065e-02 |     |  |
| -1.037663e-01 |               |               |               |               |     |  |
|               | 243           | 244           | 245           | 246           | 247 |  |
| 248           | 249           | 250           | 251           | 252           | 253 |  |
| -1.194668e-01 | -1.214013e-01 | -1.078700e-01 | -9.305723e-02 | -8.928735e-02 |     |  |
| -6.262716e-02 | -5.800605e-02 | -5.218705e-02 | -2.709255e-02 | -2.538232e-02 |     |  |
| -3.639886e-02 |               |               |               |               |     |  |
|               | 254           | 255           | 256           | 257           | 258 |  |
| 259           | 260           | 261           | 262           | 263           | 264 |  |
| -6.582952e-02 | -7.120060e-02 | -9.681732e-02 | -8.915636e-02 | -7.228710e-02 |     |  |
| -9.265239e-02 | -1.168325e-01 | -1.056425e-01 | -9.710087e-02 | -1.213802e-01 |     |  |
| -1.285682e-01 |               |               |               |               |     |  |
|               | 265           | 266           | 267           | 268           | 269 |  |
| 270           | 271           | 272           | 273           | 274           | 275 |  |
| -1.128923e-01 | -1.157323e-01 | -1.298189e-01 | -1.274895e-01 | -1.092872e-01 |     |  |
| -1.026741e-01 | -1.218345e-01 | -1.047184e-01 | -8.600636e-02 | -1.196716e-01 |     |  |
| -1.232783e-01 |               |               |               |               |     |  |
|               | 276           | 277           | 278           | 279           | 280 |  |
| 281           | 282           | 283           | 284           | 285           | 286 |  |
| -1.352356e-01 | -1.338458e-01 | -1.350661e-01 | -1.481593e-01 | -1.462470e-01 |     |  |
| -1.437605e-01 | -1.375568e-01 | -1.302884e-01 | -1.281055e-01 | -1.143956e-01 |     |  |
| -1.012505e-01 |               |               |               |               |     |  |
|               | 287           | 288           | 289           | 290           | 291 |  |
| 292           | 293           | 294           | 295           | 296           | 297 |  |
| -9.480949e-02 | -9.036317e-02 | -7.417833e-02 | -5.214805e-02 | -5.074030e-02 |     |  |
| -5.250447e-02 | -2.573108e-02 | -1.139011e-02 | -1.867486e-02 | -1.227213e-02 |     |  |
| -1.908254e-02 |               |               |               |               |     |  |
|               | 298           | 299           | 300           | 301           | 302 |  |
| 303           | 304           | 305           | 306           | 307           | 308 |  |
| -3.221407e-02 | -4.168202e-02 | -3.845684e-02 | -3.299083e-02 | -8.771964e-03 |     |  |
| 3.055485e-02  | 5.540234e-02  | 5.935382e-02  | 7.429080e-02  | 8.279061e-02  |     |  |
| 7.171248e-02  |               |               |               |               |     |  |
|               | 309           | 310           | 311           | 312           | 313 |  |
| 314           | 315           | 316           | 317           | 318           | 319 |  |
| 3.777462e-02  | 2.058206e-02  | -2.494991e-03 | -9.669736e-03 | 1.220661e-02  |     |  |
| 2.682465e-02  | 5.128291e-02  | 5.455787e-02  | 8.645620e-02  | 6.203900e-02  |     |  |
| 3.339446e-02  |               |               |               |               |     |  |
|               | 320           | 321           | 322           | 323           | 324 |  |
| 325           | 326           | 327           | 328           | 329           | 330 |  |
| 5.954068e-02  | 8.454249e-02  | 4.879118e-02  | 2.396345e-02  | 4.730204e-02  |     |  |
| 5.451922e-02  | 6.324751e-03  | 9.306724e-03  | 3.037000e-02  | -3.848348e-04 |     |  |



Supplementary Text 9

|               |               |               |               |               |     |  |
|---------------|---------------|---------------|---------------|---------------|-----|--|
| -3.753904e-02 |               |               |               |               |     |  |
| 331           | 332           | 333           | 334           | 335           |     |  |
| 336           | 337           | 338           | 339           | 340           | 341 |  |
| -3.480360e-02 | -2.858435e-02 | -6.131112e-02 | -8.697085e-02 | -1.093061e-01 |     |  |
| -1.317182e-01 | -1.276635e-01 | -1.316074e-01 | -1.411928e-01 | -1.381310e-01 |     |  |
| -1.201301e-01 |               |               |               |               |     |  |
| 342           | 343           | 344           | 345           | 346           |     |  |
| 347           | 348           | 349           | 350           | 351           | 352 |  |
| -1.083930e-01 | -1.050446e-01 | -1.199545e-01 | -1.185214e-01 | -1.162393e-01 |     |  |
| -1.201199e-01 | -1.064570e-01 | -6.443143e-02 | -4.645140e-02 | -2.412595e-02 |     |  |
| -1.444951e-02 |               |               |               |               |     |  |
| 353           | 354           | 355           | 356           | 357           |     |  |
| 358           | 359           | 360           | 361           | 362           | 363 |  |
| -4.393717e-03 | 2.752647e-02  | 4.615556e-02  | 5.408216e-02  | 8.530666e-02  |     |  |
| 1.373403e-01  | 1.383443e-01  | 1.299328e-01  | 1.748736e-01  | 2.662543e-01  |     |  |
| 2.186675e-01  |               |               |               |               |     |  |
| 364           | 365           | 366           | 367           | 368           |     |  |
| 369           | 370           | 371           | 372           | 373           | 374 |  |
| 2.016175e-01  | 2.794632e-01  | 3.106581e-01  | 3.062329e-01  | 2.531326e-01  |     |  |
| 1.647564e-01  | 1.369267e-01  | 1.834116e-01  | 1.883512e-01  | 2.401762e-01  |     |  |
| 1.821908e-01  |               |               |               |               |     |  |
| 375           | 376           | 377           | 378           | 379           |     |  |
| 380           | 381           | 382           | 383           | 384           | 385 |  |
| 1.920283e-01  | 1.772503e-01  | 1.891244e-01  | 2.049237e-01  | 2.472494e-01  |     |  |
| 2.227474e-01  | 1.860552e-01  | 1.839390e-01  | 1.283811e-01  | 1.093870e-01  |     |  |
| 9.647940e-02  |               |               |               |               |     |  |
| 386           | 387           | 388           | 389           | 390           |     |  |
| 391           | 392           | 393           | 394           | 395           | 396 |  |
| 8.420530e-02  | 6.773437e-02  | 6.759787e-02  | 5.424762e-02  | 5.140074e-02  |     |  |
| 5.529707e-02  | 3.551396e-02  | 9.787710e-03  | -2.639667e-02 | -4.478817e-02 |     |  |
| -3.395778e-02 |               |               |               |               |     |  |
| 397           | 398           | 399           | 400           | 401           |     |  |
| 402           | 403           | 404           | 405           | 406           | 407 |  |
| -1.440222e-02 | 5.832029e-03  | 2.338156e-02  | 2.707579e-02  | 2.159562e-02  |     |  |
| 2.611945e-02  | 4.001804e-02  | 6.890758e-02  | 6.404713e-02  | 4.840883e-02  |     |  |
| 8.041326e-02  |               |               |               |               |     |  |
| 408           | 409           | 410           | 411           | 412           |     |  |
| 413           | 414           | 415           | 416           | 417           | 418 |  |
| 9.122680e-02  | 1.277849e-01  | 1.861141e-01  | 2.090619e-01  | 1.658845e-01  |     |  |
| 1.472714e-01  | 1.236245e-01  | 9.820180e-02  | 1.049499e-01  | 7.344371e-02  |     |  |
| 4.628263e-02  |               |               |               |               |     |  |
| 419           | 420           | 421           | 422           | 423           |     |  |
| 424           | 425           | 426           | 427           | 428           | 429 |  |
| 3.071498e-02  | 4.709872e-02  | 7.179643e-02  | 6.866724e-02  | 9.351892e-02  |     |  |
| 1.019550e-01  | 9.912406e-02  | 7.466188e-02  | 6.771660e-02  | 3.644108e-02  |     |  |
| 3.443468e-02  |               |               |               |               |     |  |
| 430           | 431           | 432           | 433           | 434           |     |  |
| 435           | 436           | 437           | 438           | 439           | 440 |  |
| 3.579675e-02  | 3.304489e-02  | 6.236806e-02  | 8.612057e-02  | 8.098066e-02  |     |  |
| 9.971813e-02  | 7.614755e-02  | 8.165880e-02  | 6.151298e-02  | 9.290192e-02  |     |  |
| 1.235838e-01  |               |               |               |               |     |  |
| 441           | 442           | 443           | 444           | 445           |     |  |
| 446           | 447           | 448           | 449           | 450           | 451 |  |
| 9.331527e-02  | 1.046396e-01  | 1.553365e-01  | 1.856361e-01  | 1.581761e-01  |     |  |

Supplementary Text 9

|               |               |               |               |               |     |     |
|---------------|---------------|---------------|---------------|---------------|-----|-----|
| 2.123518e-01  | 3.109545e-01  | 2.486253e-01  | 2.014124e-01  | 2.633675e-01  |     |     |
| 3.643655e-01  |               |               |               |               |     |     |
|               | 452           | 453           | 454           | 455           | 456 |     |
| 457           | 458           | 459           | 460           | 461           |     | 462 |
| 3.907793e-01  | 3.680605e-01  | 5.414448e-01  | 6.141419e-01  | 5.860379e-01  |     |     |
| 3.639714e-01  | 3.123278e-01  | 2.243738e-01  | 1.589507e-01  | 1.522220e-01  |     |     |
| 1.167991e-01  |               |               |               |               |     |     |
|               | 463           | 464           | 465           | 466           | 467 |     |
| 468           | 469           | 470           | 471           | 472           |     | 473 |
| 9.831725e-02  | 7.174771e-02  | 4.056257e-02  | 1.682308e-03  | -3.039405e-02 |     |     |
| -5.011827e-02 | -1.104716e-01 | -1.172855e-01 | -1.229640e-01 | -1.467274e-01 |     |     |
| -1.743700e-01 |               |               |               |               |     |     |
|               | 474           | 475           | 476           | 477           | 478 |     |
| 479           | 480           | 481           | 482           | 483           |     | 484 |
| -2.008428e-01 | -1.824921e-01 | -1.880036e-01 | -1.994923e-01 | -1.871279e-01 |     |     |
| -1.599856e-01 | -1.507815e-01 | -1.707018e-01 | -1.418774e-01 | -1.377621e-01 |     |     |
| -9.181259e-02 |               |               |               |               |     |     |
|               | 485           | 486           | 487           | 488           | 489 |     |
| 490           | 491           | 492           | 493           | 494           |     | 495 |
| -9.450009e-02 | -1.454116e-01 | -1.309100e-01 | -1.582962e-01 | -1.335425e-01 |     |     |
| -9.444179e-02 | -1.011824e-01 | -6.904878e-02 | -1.055495e-01 | -2.257515e-02 |     |     |
| -3.609313e-02 |               |               |               |               |     |     |
|               | 496           | 497           | 498           | 499           | 500 |     |
| 501           | 502           | 503           | 504           | 505           |     | 506 |
| -3.752540e-02 | -2.788798e-02 | -1.276369e-02 | 1.220533e-02  | 1.338606e-02  |     |     |
| 1.351073e-02  | 3.216463e-02  | 3.780232e-02  | 7.312801e-02  | 3.810220e-02  |     |     |
| 3.377265e-02  |               |               |               |               |     |     |
|               | 507           | 508           | 509           | 510           | 511 |     |
| 512           | 513           | 514           | 515           | 516           |     | 517 |
| -1.548686e-02 | -8.677333e-02 | -1.527735e-01 | -1.884584e-01 | -2.059332e-01 |     |     |
| -1.784607e-01 | -1.717799e-01 | -1.240107e-01 | -1.019069e-01 | -5.940862e-02 |     |     |
| -2.622971e-02 |               |               |               |               |     |     |
|               | 518           | 519           | 520           | 521           | 522 |     |
| 523           | 524           | 525           | 526           | 527           |     | 528 |
| -5.351665e-02 | -5.700742e-02 | -1.111377e-02 | -2.644825e-02 | -2.244859e-02 |     |     |
| -6.591435e-02 | -7.433951e-02 | -8.456222e-02 | -8.131046e-02 | -8.996664e-02 |     |     |
| -5.089539e-02 |               |               |               |               |     |     |
|               | 529           | 530           | 531           | 532           | 533 |     |
| 534           | 535           | 536           | 537           | 538           |     | 539 |
| -1.747191e-02 | -8.922237e-03 | -3.193719e-03 | -5.617689e-02 | -6.030095e-02 |     |     |
| -1.304084e-02 | -1.992879e-03 | -4.813257e-02 | -9.151087e-02 | -8.875768e-02 |     |     |
| -1.196506e-01 |               |               |               |               |     |     |
|               | 540           | 541           | 542           | 543           | 544 |     |
| 545           | 546           | 547           | 548           | 549           |     | 550 |
| -1.377065e-01 | -1.677887e-01 | -1.738834e-01 | -1.289380e-01 | -8.698261e-02 |     |     |
| -3.814664e-02 | 1.371555e-02  | 8.833152e-04  | 3.830180e-02  | 2.998270e-02  |     |     |
| 4.729799e-02  |               |               |               |               |     |     |
|               | 551           | 552           | 553           | 554           | 555 |     |
| 556           | 557           | 558           | 559           | 560           |     |     |
| 5.474466e-02  | 5.908031e-02  | 3.170921e-02  | 3.630233e-02  | 1.036670e-02  |     |     |
| -1.393153e-02 | -1.891855e-03 | -5.558325e-03 | 1.436363e-02  | 4.160027e-02  |     |     |

Supplementary Text 9

|               |               |               |               |               |     |     |
|---------------|---------------|---------------|---------------|---------------|-----|-----|
| 6             | 1             | 2             | 3             | 4             | 5   | 11  |
| 1.000000e+00  | 7             | 8             | 9             | 10            |     |     |
| 2.831764e-01  | 4.145520e-01  | 3.255244e-01  | 3.042981e-01  | 2.744211e-01  |     |     |
| 1.024690e-01  | 2.173967e-01  | 1.995772e-01  | 1.619080e-01  | 1.273567e-01  |     |     |
| 17            | 12            | 13            | 14            | 15            | 16  | 22  |
| 1.007860e-01  | 18            | 19            | 20            | 21            |     |     |
| 2.652078e-02  | 8.426675e-02  | 6.114644e-02  | 5.276657e-02  | 4.661500e-02  |     |     |
| 4.169350e-03  | 1.612062e-02  | 6.225996e-03  | 2.725771e-03  | -1.942248e-05 |     |     |
| 28            | 23            | 24            | 25            | 26            | 27  | 33  |
| 7.731004e-03  | 29            | 30            | 31            | 32            |     |     |
| 2.265423e-02  | 1.296736e-02  | 1.118890e-02  | 1.905428e-02  | 2.951308e-02  |     |     |
| 2.304159e-03  | 7.361874e-03  | -1.428519e-02 | 6.567365e-03  | 6.374527e-03  |     |     |
| 39            | 34            | 35            | 36            | 37            | 38  | 44  |
| 1.435856e-03  | 40            | 41            | 42            | 43            |     |     |
| -3.013135e-02 | -3.593407e-03 | -4.891243e-03 | -1.499585e-02 | -1.506309e-02 |     |     |
| -3.703737e-02 | -2.872051e-02 | -2.992896e-02 | -3.661449e-02 | -3.693708e-02 |     |     |
| 50            | 45            | 46            | 47            | 48            | 49  | 55  |
| -2.889030e-02 | 51            | 52            | 53            | 54            |     |     |
| -2.045173e-03 | -2.947007e-02 | -1.236913e-02 | -1.180108e-02 | -1.135058e-02 |     |     |
| 3.684234e-03  | -1.884095e-03 | -4.558879e-03 | 9.668203e-03  | 1.690579e-02  |     |     |
| 61            | 56            | 57            | 58            | 59            | 60  | 66  |
| -2.964698e-03 | 62            | 63            | 64            | 65            |     |     |
| -4.813531e-02 | -1.023790e-02 | -1.989029e-02 | -3.705560e-02 | -4.615857e-02 |     |     |
| 1.932323e-03  | -2.711750e-02 | -2.337672e-02 | -4.096177e-02 | -2.786247e-02 |     |     |
| 72            | 67            | 68            | 69            | 70            | 71  | 77  |
| -9.209423e-03 | 73            | 74            | 75            | 76            |     |     |
| 3.649154e-03  | -2.308118e-02 | 9.632225e-03  | 2.391557e-02  | -4.689395e-03 |     |     |
| 2.963204e-02  | 4.453452e-02  | 3.388845e-02  | -4.131186e-03 | -4.477981e-03 |     |     |
| 83            | 78            | 79            | 80            | 81            | 82  | 88  |
| 5.893776e-02  | 84            | 85            | 86            | 87            |     |     |
| 1.939894e-01  | 8.768916e-02  | 1.310381e-01  | 1.258671e-01  | 1.433258e-01  |     |     |
| 8.104214e-02  | 2.168107e-01  | 1.706825e-01  | 1.304883e-01  | 1.134347e-01  |     |     |
| 94            | 89            | 90            | 91            | 92            | 93  | 99  |
| 7.202386e-02  | 95            | 96            | 97            | 98            |     |     |
| 1.169343e-02  | 7.571489e-02  | 4.930957e-02  | 3.364128e-02  | 3.417958e-02  |     |     |
| -2.368397e-02 | -7.268791e-05 | -1.478644e-03 | -1.900891e-02 | -2.999449e-02 |     |     |
| 105           | 100           | 101           | 102           | 103           | 104 | 110 |
| -3.103767e-02 | 106           | 107           | 108           | 109           |     |     |
| -5.977178e-02 | -4.369817e-02 | -4.125322e-02 | -3.975056e-02 | -4.868380e-02 |     |     |
| -8.334700e-02 | -4.258543e-02 | -5.614122e-02 | -5.468373e-02 | -8.365933e-02 |     |     |
| 116           | 111           | 112           | 113           | 114           | 115 | 121 |
| -7.374733e-02 | 117           | 118           | 119           | 120           |     |     |
|               | -6.189727e-02 | -5.332885e-02 | -5.252323e-02 | -3.835204e-02 |     |     |

Supplementary Text 9

|               |               |               |               |               |     |  |
|---------------|---------------|---------------|---------------|---------------|-----|--|
| -2.826358e-02 | -2.878469e-02 | -2.923048e-02 | -2.157081e-02 | -1.017489e-02 |     |  |
| -9.934835e-03 |               |               |               |               |     |  |
|               | 122           | 123           | 124           | 125           | 126 |  |
| 127           | 128           | 129           | 130           | 131           | 132 |  |
| -2.935499e-03 | -6.958600e-04 | -3.700578e-03 | 3.784574e-03  | 9.302779e-03  |     |  |
| 4.641853e-03  | 5.108159e-03  | 5.503208e-03  | 6.979542e-03  | 1.972616e-03  |     |  |
| -4.155708e-03 |               |               |               |               |     |  |
|               | 133           | 134           | 135           | 136           | 137 |  |
| 138           | 139           | 140           | 141           | 142           | 143 |  |
| -1.400593e-02 | -2.781033e-02 | -3.150000e-02 | -3.993179e-02 | -4.541422e-02 |     |  |
| -5.554064e-02 | -7.466031e-02 | -8.045299e-02 | -9.184183e-02 | -1.076056e-01 |     |  |
| -9.789273e-02 |               |               |               |               |     |  |
|               | 144           | 145           | 146           | 147           | 148 |  |
| 149           | 150           | 151           | 152           | 153           | 154 |  |
| -1.007385e-01 | -1.130642e-01 | -1.173988e-01 | -1.244879e-01 | -1.151989e-01 |     |  |
| -9.655385e-02 | -1.078442e-01 | -1.096955e-01 | -8.015252e-02 | -8.032774e-02 |     |  |
| -9.347878e-02 |               |               |               |               |     |  |
|               | 155           | 156           | 157           | 158           | 159 |  |
| 160           | 161           | 162           | 163           | 164           | 165 |  |
| -8.898061e-02 | -5.752847e-02 | -6.631594e-02 | -8.386545e-02 | -5.613508e-02 |     |  |
| -3.713253e-02 | -5.520059e-02 | -4.728267e-02 | -2.707021e-02 | -3.046278e-02 |     |  |
| -4.142490e-02 |               |               |               |               |     |  |
|               | 166           | 167           | 168           | 169           | 170 |  |
| 171           | 172           | 173           | 174           | 175           | 176 |  |
| -3.054684e-02 | -1.735537e-02 | -9.356644e-03 | -1.010424e-02 | -5.957688e-03 |     |  |
| -1.229866e-02 | -2.468786e-02 | -3.940336e-02 | -4.894191e-02 | -6.049229e-02 |     |  |
| -7.704150e-02 |               |               |               |               |     |  |
|               | 177           | 178           | 179           | 180           | 181 |  |
| 182           | 183           | 184           | 185           | 186           | 187 |  |
| -8.304375e-02 | -8.045545e-02 | -8.993376e-02 | -1.015395e-01 | -1.058402e-01 |     |  |
| -1.061919e-01 | -1.135663e-01 | -1.143390e-01 | -1.212134e-01 | -1.252710e-01 |     |  |
| -1.231964e-01 |               |               |               |               |     |  |
|               | 188           | 189           | 190           | 191           | 192 |  |
| 193           | 194           | 195           | 196           | 197           | 198 |  |
| -1.107799e-01 | -1.099933e-01 | -1.089102e-01 | -1.053038e-01 | -1.048746e-01 |     |  |
| -1.015994e-01 | -9.035960e-02 | -8.362129e-02 | -7.414281e-02 | -6.345914e-02 |     |  |
| -6.511694e-02 |               |               |               |               |     |  |
|               | 199           | 200           | 201           | 202           | 203 |  |
| 204           | 205           | 206           | 207           | 208           | 209 |  |
| -5.171831e-02 | -3.191438e-02 | -2.397102e-02 | -1.290021e-02 | -3.092404e-02 |     |  |
| -4.506032e-02 | -4.407712e-02 | -5.987211e-02 | -4.740191e-02 | -5.575232e-02 |     |  |
| -7.630043e-02 |               |               |               |               |     |  |
|               | 210           | 211           | 212           | 213           | 214 |  |
| 215           | 216           | 217           | 218           | 219           | 220 |  |
| -9.691928e-02 | -1.192610e-01 | -1.110159e-01 | -1.100392e-01 | -1.298060e-01 |     |  |
| -1.263580e-01 | -1.051801e-01 | -1.164868e-01 | -1.307378e-01 | -1.138442e-01 |     |  |
| -9.621380e-02 |               |               |               |               |     |  |
|               | 221           | 222           | 223           | 224           | 225 |  |
| 226           | 227           | 228           | 229           | 230           | 231 |  |
| -1.113608e-01 | -1.111374e-01 | -7.909033e-02 | -8.153964e-02 | -8.523465e-02 |     |  |
| -8.913402e-02 | -9.394421e-02 | -9.301416e-02 | -1.019502e-01 | -1.259883e-01 |     |  |
| -1.281128e-01 |               |               |               |               |     |  |
|               | 232           | 233           | 234           | 235           | 236 |  |
| 237           | 238           | 239           | 240           | 241           | 242 |  |

Supplementary Text 9

|               |               |               |               |               |     |
|---------------|---------------|---------------|---------------|---------------|-----|
| -1.401850e-01 | -1.344318e-01 | -1.278040e-01 | -1.364923e-01 | -1.297262e-01 |     |
| -1.246197e-01 | -1.206900e-01 | -1.164497e-01 | -1.115982e-01 | -1.044789e-01 |     |
| -1.048956e-01 |               |               |               |               |     |
|               | 243           | 244           | 245           | 246           | 247 |
| 248           | 249           | 250           | 251           | 252           | 253 |
| -7.941746e-02 | -8.275007e-02 | -6.932797e-02 | -7.121895e-02 | -6.859499e-02 |     |
| -4.970570e-02 | -3.734806e-02 | -2.156131e-02 | -1.937674e-02 | -7.404236e-03 |     |
| -2.101048e-02 |               |               |               |               |     |
|               | 254           | 255           | 256           | 257           | 258 |
| 259           | 260           | 261           | 262           | 263           | 264 |
| -4.118563e-02 | -6.451831e-02 | -7.260718e-02 | -7.995161e-02 | -6.397197e-02 |     |
| -5.572337e-02 | -8.632861e-02 | -8.803004e-02 | -6.219765e-02 | -6.704972e-02 |     |
| -8.630020e-02 |               |               |               |               |     |
|               | 265           | 266           | 267           | 268           | 269 |
| 270           | 271           | 272           | 273           | 274           | 275 |
| -7.706951e-02 | -4.734126e-02 | -3.970317e-02 | -5.671438e-02 | -6.438019e-02 |     |
| -9.093997e-02 | -9.327577e-02 | -9.051948e-02 | -8.919688e-02 | -9.023098e-02 |     |
| -1.063504e-01 |               |               |               |               |     |
|               | 276           | 277           | 278           | 279           | 280 |
| 281           | 282           | 283           | 284           | 285           | 286 |
| -1.221868e-01 | -1.120374e-01 | -1.171565e-01 | -1.039415e-01 | -1.011973e-01 |     |
| -1.065146e-01 | -1.076706e-01 | -1.117231e-01 | -9.992531e-02 | -9.879740e-02 |     |
| -9.823136e-02 |               |               |               |               |     |
|               | 287           | 288           | 289           | 290           | 291 |
| 292           | 293           | 294           | 295           | 296           | 297 |
| -8.038513e-02 | -7.254268e-02 | -7.721364e-02 | -6.269818e-02 | -4.058490e-02 |     |
| -3.827701e-02 | -3.784211e-02 | -1.436434e-02 | 5.811705e-03  | -4.965560e-03 |     |
| 1.359151e-02  |               |               |               |               |     |
|               | 298           | 299           | 300           | 301           | 302 |
| 303           | 304           | 305           | 306           | 307           | 308 |
| 9.007175e-03  | -1.317783e-02 | -2.855894e-02 | -3.924755e-02 | -2.674725e-02 |     |
| 2.004846e-03  | 3.761404e-02  | 7.951269e-02  | 7.742544e-02  | 1.046950e-01  |     |
| 1.235518e-01  |               |               |               |               |     |
|               | 309           | 310           | 311           | 312           | 313 |
| 314           | 315           | 316           | 317           | 318           | 319 |
| 1.050134e-01  | 5.415212e-02  | 2.259587e-02  | -1.271443e-02 | -9.974784e-03 |     |
| 1.378410e-03  | -5.159348e-03 | 6.240208e-03  | 2.666301e-02  | 7.235706e-02  |     |
| 4.754242e-02  |               |               |               |               |     |
|               | 320           | 321           | 322           | 323           | 324 |
| 325           | 326           | 327           | 328           | 329           | 330 |
| 3.939443e-02  | 9.054675e-02  | 1.089120e-01  | 6.065751e-02  | 6.934832e-02  |     |
| 1.176112e-01  | 8.560580e-02  | 4.416218e-02  | 7.895377e-02  | 8.780888e-02  |     |
| 3.900701e-02  |               |               |               |               |     |
|               | 331           | 332           | 333           | 334           | 335 |
| 336           | 337           | 338           | 339           | 340           | 341 |
| 1.417854e-02  | 3.682394e-02  | 2.712227e-02  | -5.884120e-03 | -3.276142e-02 |     |
| -4.628849e-02 | -2.090507e-02 | -1.285721e-02 | -2.201826e-03 | -2.230840e-02 |     |
| -2.195716e-02 |               |               |               |               |     |
|               | 342           | 343           | 344           | 345           | 346 |
| 347           | 348           | 349           | 350           | 351           | 352 |
| -2.359293e-02 | -4.279818e-02 | -6.375148e-02 | -6.995173e-02 | -8.616905e-02 |     |
| -7.670681e-02 | -5.103556e-02 | -3.874213e-02 | -1.791733e-02 | 4.224504e-03  |     |
| 3.047642e-02  |               |               |               |               |     |
|               | 353           | 354           | 355           | 356           | 357 |

Supplementary Text 9

|               |               |               |               |               |     |
|---------------|---------------|---------------|---------------|---------------|-----|
| 358           | 359           | 360           | 361           | 362           | 363 |
| 6.472637e-02  | 7.333980e-02  | 8.323791e-02  | 1.250029e-01  | 1.530245e-01  |     |
| 1.507563e-01  | 1.955851e-01  | 2.479219e-01  | 2.554858e-01  | 3.393081e-01  |     |
| 4.701508e-01  |               |               |               |               |     |
|               | 364           | 365           | 366           | 367           | 368 |
| 369           | 370           | 371           | 372           | 373           | 374 |
| 3.593094e-01  | 2.753006e-01  | 4.190955e-01  | 4.929664e-01  | 4.351854e-01  |     |
| 2.753082e-01  | 1.930050e-01  | 1.821765e-01  | 2.292516e-01  | 3.561161e-01  |     |
| 3.768127e-01  |               |               |               |               |     |
|               | 375           | 376           | 377           | 378           | 379 |
| 380           | 381           | 382           | 383           | 384           | 385 |
| 2.539146e-01  | 2.142276e-01  | 1.788988e-01  | 1.681026e-01  | 2.132738e-01  |     |
| 3.056259e-01  | 2.577513e-01  | 2.085597e-01  | 1.933139e-01  | 1.247019e-01  |     |
| 1.037099e-01  |               |               |               |               |     |
|               | 386           | 387           | 388           | 389           | 390 |
| 391           | 392           | 393           | 394           | 395           | 396 |
| 8.148094e-02  | 4.318202e-02  | 2.170444e-02  | -3.504593e-03 | -3.651717e-03 |     |
| -1.084786e-02 | -2.662726e-02 | -3.064877e-02 | -3.071501e-02 | -1.310923e-02 |     |
| -2.171369e-02 |               |               |               |               |     |
|               | 397           | 398           | 399           | 400           | 401 |
| 402           | 403           | 404           | 405           | 406           | 407 |
| 4.272526e-03  | 6.027451e-03  | -2.393852e-03 | -6.012911e-03 | -2.329918e-02 |     |
| -3.464360e-02 | -4.244126e-02 | -4.390396e-02 | -3.367974e-02 | -1.298181e-02 |     |
| -9.365742e-03 |               |               |               |               |     |
|               | 408           | 409           | 410           | 411           | 412 |
| 413           | 414           | 415           | 416           | 417           | 418 |
| 7.799533e-03  | 3.467131e-02  | 6.701690e-02  | 1.161554e-01  | 1.232235e-01  |     |
| 1.116125e-01  | 1.304629e-01  | 9.255672e-02  | 6.114862e-02  | 6.252053e-02  |     |
| 1.015199e-01  |               |               |               |               |     |
|               | 419           | 420           | 421           | 422           | 423 |
| 424           | 425           | 426           | 427           | 428           | 429 |
| 6.944524e-02  | 5.972889e-02  | 9.235919e-02  | 1.232765e-01  | 1.123546e-01  |     |
| 1.232902e-01  | 7.679254e-02  | 8.562645e-02  | 6.435512e-02  | 4.222494e-02  |     |
| 1.801107e-02  |               |               |               |               |     |
|               | 430           | 431           | 432           | 433           | 434 |
| 435           | 436           | 437           | 438           | 439           | 440 |
| 1.703782e-02  | 6.154780e-03  | -1.824964e-03 | 3.367129e-02  | 5.167166e-02  |     |
| 3.195205e-02  | 4.995286e-02  | 2.860629e-02  | 3.102924e-02  | 3.586292e-02  |     |
| 6.751725e-02  |               |               |               |               |     |
|               | 441           | 442           | 443           | 444           | 445 |
| 446           | 447           | 448           | 449           | 450           | 451 |
| 8.616433e-02  | 6.254167e-02  | 7.074900e-02  | 1.140512e-01  | 1.003484e-01  |     |
| 7.891977e-02  | 1.200996e-01  | 1.380214e-01  | 1.397348e-01  | 1.837039e-01  |     |
| 2.190533e-01  |               |               |               |               |     |
|               | 452           | 453           | 454           | 455           | 456 |
| 457           | 458           | 459           | 460           | 461           | 462 |
| 2.134257e-01  | 2.218629e-01  | 2.882083e-01  | 2.620503e-01  | 2.458346e-01  |     |
| 1.412222e-01  | 1.352775e-01  | 7.828035e-02  | 6.876634e-02  | 5.637128e-02  |     |
| 4.087733e-02  |               |               |               |               |     |
|               | 463           | 464           | 465           | 466           | 467 |
| 468           | 469           | 470           | 471           | 472           | 473 |
| 1.640503e-02  | -1.788048e-03 | -9.366537e-03 | -2.494835e-02 | -5.038498e-02 |     |
| -6.258310e-02 | -1.205878e-01 | -1.288877e-01 | -1.440287e-01 | -1.299053e-01 |     |
| -1.250868e-01 |               |               |               |               |     |

Supplementary Text 9

|               |               |  |               |  |               |  |               |  |     |  |
|---------------|---------------|--|---------------|--|---------------|--|---------------|--|-----|--|
|               | 474           |  | 475           |  | 476           |  | 477           |  | 478 |  |
| 479           | 480           |  | 481           |  | 482           |  | 483           |  | 484 |  |
| -1.104749e-01 | -1.554176e-01 |  | -1.549515e-01 |  | -1.784475e-01 |  | -1.602977e-01 |  |     |  |
| -1.465678e-01 | -1.480417e-01 |  | -1.337955e-01 |  | -1.139932e-01 |  | -8.864285e-02 |  |     |  |
| -6.254132e-02 |               |  |               |  |               |  |               |  |     |  |
|               | 485           |  | 486           |  | 487           |  | 488           |  | 489 |  |
| 490           | 491           |  | 492           |  | 493           |  | 494           |  | 495 |  |
| -3.706707e-02 | -7.392721e-02 |  | -7.342036e-02 |  | -1.034788e-01 |  | -1.346838e-01 |  |     |  |
| -1.206753e-01 | -1.620750e-01 |  | -1.572286e-01 |  | -1.259552e-01 |  | -8.685949e-02 |  |     |  |
| -7.870409e-02 |               |  |               |  |               |  |               |  |     |  |
|               | 496           |  | 497           |  | 498           |  | 499           |  | 500 |  |
| 501           | 502           |  | 503           |  | 504           |  | 505           |  | 506 |  |
| -4.286929e-02 | -4.553163e-02 |  | -3.994228e-02 |  | -2.491719e-02 |  | -2.550908e-02 |  |     |  |
| -2.859290e-02 | -6.582732e-02 |  | -3.342839e-02 |  | -6.990385e-02 |  | -9.943620e-02 |  |     |  |
| -1.498838e-01 |               |  |               |  |               |  |               |  |     |  |
|               | 507           |  | 508           |  | 509           |  | 510           |  | 511 |  |
| 512           | 513           |  | 514           |  | 515           |  | 516           |  | 517 |  |
| -1.073327e-01 | -1.220312e-01 |  | -1.030570e-01 |  | -6.661283e-02 |  | -5.835026e-02 |  |     |  |
| -2.498277e-02 | 4.374925e-03  |  | 9.131935e-03  |  | 3.546293e-02  |  | 6.811612e-02  |  |     |  |
| 4.221065e-02  |               |  |               |  |               |  |               |  |     |  |
|               | 518           |  | 519           |  | 520           |  | 521           |  | 522 |  |
| 523           | 524           |  | 525           |  | 526           |  | 527           |  | 528 |  |
| 5.644116e-02  | 8.946959e-02  |  | 9.305247e-02  |  | 1.147403e-01  |  | 9.028500e-02  |  |     |  |
| 7.909871e-02  | 9.140191e-02  |  | 7.217791e-02  |  | 7.393844e-02  |  | 5.522920e-02  |  |     |  |
| 1.511009e-02  |               |  |               |  |               |  |               |  |     |  |
|               | 529           |  | 530           |  | 531           |  | 532           |  | 533 |  |
| 534           | 535           |  | 536           |  | 537           |  | 538           |  | 539 |  |
| 1.492788e-02  | 6.864886e-02  |  | 6.186933e-02  |  | 3.192480e-02  |  | 8.183405e-02  |  |     |  |
| 7.319828e-02  | 9.856092e-02  |  | 8.153415e-02  |  | 4.478328e-02  |  | 3.065622e-02  |  |     |  |
| 2.337172e-02  |               |  |               |  |               |  |               |  |     |  |
|               | 540           |  | 541           |  | 542           |  | 543           |  | 544 |  |
| 545           | 546           |  | 547           |  | 548           |  | 549           |  | 550 |  |
| -8.827228e-04 | -4.323504e-02 |  | -6.124234e-02 |  | -3.724039e-02 |  | -5.176305e-02 |  |     |  |
| -2.822459e-02 | 1.374219e-02  |  | 2.147295e-02  |  | 5.268923e-02  |  | -6.359497e-03 |  |     |  |
| 2.127557e-02  |               |  |               |  |               |  |               |  |     |  |
|               | 551           |  | 552           |  | 553           |  | 554           |  | 555 |  |
| 556           | 557           |  | 558           |  | 559           |  | 560           |  | 561 |  |
| 5.107039e-02  | 5.211906e-02  |  | 3.888067e-02  |  | 2.918566e-02  |  | 2.263912e-02  |  |     |  |
| 4.816804e-03  | -5.843647e-03 |  | -3.423208e-02 |  | -3.370983e-02 |  | -6.427204e-02 |  |     |  |
| -3.154633e-02 |               |  |               |  |               |  |               |  |     |  |
|               | 562           |  | 563           |  | 564           |  | 565           |  | 566 |  |
| 567           | 568           |  | 569           |  | 570           |  | 571           |  | 572 |  |
| -4.983678e-02 | -1.205685e-04 |  | 1.615499e-03  |  | -7.963427e-03 |  | 2.792324e-02  |  |     |  |
| 2.112887e-02  | 2.043531e-02  |  | 5.748358e-02  |  | 4.413698e-02  |  | 3.786795e-02  |  |     |  |
| -7.538518e-03 |               |  |               |  |               |  |               |  |     |  |
|               | 573           |  | 574           |  | 575           |  | 576           |  |     |  |
| -3.217432e-02 | -5.886295e-02 |  | -8.714950e-02 |  | -1.166533e-01 |  |               |  |     |  |

Q93WY9\_40.1ns (MATRIX)

|              |              |  |              |  |              |  |              |  |    |  |
|--------------|--------------|--|--------------|--|--------------|--|--------------|--|----|--|
|              | 1            |  | 2            |  | 3            |  | 4            |  | 5  |  |
| 6            | 7            |  | 8            |  | 9            |  | 10           |  | 11 |  |
| 0.4145520052 | 1.0000000000 |  | 0.5973829880 |  | 0.4444243934 |  | 0.3924631378 |  |    |  |

Supplementary Text 9

|               |               |               |               |               |     |  |
|---------------|---------------|---------------|---------------|---------------|-----|--|
| 0.4643729518  | 0.3201900504  | 0.2748038132  | 0.2306620698  | 0.1886092616  |     |  |
| 0.1563005057  |               |               |               |               |     |  |
|               | 12            | 13            | 14            | 15            | 16  |  |
| 17            | 18            | 19            | 20            | 21            | 22  |  |
| 0.1528730198  | 0.1299785222  | 0.1049547703  | 0.0947384513  | 0.0851878279  |     |  |
| 0.0635428544  | 0.0473887287  | 0.0396339291  | 0.0324897764  | 0.0256961589  |     |  |
| 0.0258171530  |               |               |               |               |     |  |
|               | 23            | 24            | 25            | 26            | 27  |  |
| 28            | 29            | 30            | 31            | 32            | 33  |  |
| 0.0310289264  | 0.0404280647  | 0.0368391745  | 0.0404837444  | 0.0548519638  |     |  |
| 0.0508276261  | 0.0325243790  | 0.0065293041  | 0.0363305460  | 0.0342709645  |     |  |
| 0.0304608977  |               |               |               |               |     |  |
|               | 34            | 35            | 36            | 37            | 38  |  |
| 39            | 40            | 41            | 42            | 43            | 44  |  |
| 0.0310249204  | 0.0241363271  | 0.0222135850  | 0.0096025904  | 0.0084412595  |     |  |
| -0.0072563260 | -0.0058792950 | -0.0122765241 | -0.0199816017 | -0.0172121027 |     |  |
| -0.0159561188 |               |               |               |               |     |  |
|               | 45            | 46            | 47            | 48            | 49  |  |
| 50            | 51            | 52            | 53            | 54            | 55  |  |
| -0.0042649278 | -0.0053823706 | 0.0113715082  | 0.0175489301  | 0.0126690511  |     |  |
| 0.0221273115  | 0.0157841047  | 0.0086382494  | 0.0189298943  | 0.0287824310  |     |  |
| 0.0172904251  |               |               |               |               |     |  |
|               | 56            | 57            | 58            | 59            | 60  |  |
| 61            | 62            | 63            | 64            | 65            | 66  |  |
| 0.0125570269  | 0.0041218081  | -0.0026557463 | -0.0242245964 | -0.0326937234 |     |  |
| -0.0402080363 | -0.0197232286 | -0.0083008064 | -0.0255620829 | -0.0186857777 |     |  |
| 0.0150083580  |               |               |               |               |     |  |
|               | 67            | 68            | 69            | 70            | 71  |  |
| 72            | 73            | 74            | 75            | 76            | 77  |  |
| 0.0085456736  | -0.0084192634 | 0.0218392164  | 0.0438822454  | 0.0139589030  |     |  |
| 0.0225771811  | 0.0700886450  | 0.0602301557  | 0.0178214945  | 0.0150028909  |     |  |
| 0.0533378873  |               |               |               |               |     |  |
|               | 78            | 79            | 80            | 81            | 82  |  |
| 83            | 84            | 85            | 86            | 87            | 88  |  |
| 0.0921803983  | 0.1156142542  | 0.1732891993  | 0.1693233376  | 0.1688134524  |     |  |
| 0.2341741539  | 0.2910316980  | 0.2114663188  | 0.1527040304  | 0.1296202924  |     |  |
| 0.0926843472  |               |               |               |               |     |  |
|               | 89            | 90            | 91            | 92            | 93  |  |
| 94            | 95            | 96            | 97            | 98            | 99  |  |
| 0.0904168142  | 0.0993625010  | 0.0720940262  | 0.0564122873  | 0.0598340136  |     |  |
| 0.0367749199  | 0.0293615052  | 0.0271020185  | 0.0081163596  | -0.0029910448 |     |  |
| 0.0054323322  |               |               |               |               |     |  |
|               | 100           | 101           | 102           | 103           | 104 |  |
| 105           | 106           | 107           | 108           | 109           | 110 |  |
| -0.0040720547 | -0.0198749559 | -0.0167737240 | -0.0140704114 | -0.0248921710 |     |  |
| -0.0388973524 | -0.0267367390 | -0.0414705671 | -0.0430185640 | -0.0679521621 |     |  |
| -0.0673517908 |               |               |               |               |     |  |
|               | 111           | 112           | 113           | 114           | 115 |  |
| 116           | 117           | 118           | 119           | 120           | 121 |  |
| -0.0559795573 | -0.0434196811 | -0.0381514917 | -0.0386127899 | -0.0209032775 |     |  |
| -0.0142584795 | -0.0155045040 | -0.0206936270 | -0.0141983890 | 0.0001185827  |     |  |
| 0.0029014308  |               |               |               |               |     |  |
|               | 122           | 123           | 124           | 125           | 126 |  |
| 127           | 128           | 129           | 130           | 131           | 132 |  |



Supplementary Text 9

|               |               |               |               |               |  |     |
|---------------|---------------|---------------|---------------|---------------|--|-----|
| 0.0063270860  | 0.0079345319  | 0.0084479964  | 0.0199781327  | 0.0279777083  |  |     |
| 0.0248961978  | 0.0264929478  | 0.0299813480  | 0.0302614934  | 0.0232218429  |  |     |
| 0.0144186050  |               |               |               |               |  |     |
|               | 133           | 134           | 135           | 136           |  | 137 |
| 138           | 139           | 140           | 141           | 142           |  | 143 |
| 0.0014873737  | -0.0128311531 | -0.0139471883 | -0.0252371507 | -0.0299728007 |  |     |
| -0.0443478384 | -0.0605113398 | -0.0695281772 | -0.0807111698 | -0.0980308173 |  |     |
| -0.0923135170 |               |               |               |               |  |     |
|               | 144           | 145           | 146           | 147           |  | 148 |
| 149           | 150           | 151           | 152           | 153           |  | 154 |
| -0.0960005045 | -0.1115694306 | -0.1162091973 | -0.1231022108 | -0.1153957256 |  |     |
| -0.0919681502 | -0.0990888629 | -0.1040350683 | -0.0733207261 | -0.0677252848 |  |     |
| -0.0790527946 |               |               |               |               |  |     |
|               | 155           | 156           | 157           | 158           |  | 159 |
| 160           | 161           | 162           | 163           | 164           |  | 165 |
| -0.0755504744 | -0.0397255096 | -0.0445687507 | -0.0629873386 | -0.0375285459 |  |     |
| -0.0146068953 | -0.0322434195 | -0.0275770951 | -0.0062084509 | -0.0084001175 |  |     |
| -0.0214970014 |               |               |               |               |  |     |
|               | 166           | 167           | 168           | 169           |  | 170 |
| 171           | 172           | 173           | 174           | 175           |  | 176 |
| -0.0148589210 | -0.0019205683 | 0.0062624220  | 0.0035778749  | 0.0058591460  |  |     |
| 0.0031140213  | -0.0081264937 | -0.0193741543 | -0.0303587602 | -0.0386319656 |  |     |
| -0.0571049572 |               |               |               |               |  |     |
|               | 177           | 178           | 179           | 180           |  | 181 |
| 182           | 183           | 184           | 185           | 186           |  | 187 |
| -0.0647949454 | -0.0621060179 | -0.0730668321 | -0.0878579706 | -0.0923467227 |  |     |
| -0.0933091710 | -0.1042948341 | -0.1074606452 | -0.1148380459 | -0.1205786248 |  |     |
| -0.1221765939 |               |               |               |               |  |     |
|               | 188           | 189           | 190           | 191           |  | 192 |
| 193           | 194           | 195           | 196           | 197           |  | 198 |
| -0.1109892666 | -0.1105867100 | -0.1122941140 | -0.1092852337 | -0.1087989173 |  |     |
| -0.1036984833 | -0.0889389836 | -0.0841283508 | -0.0776087539 | -0.0641530254 |  |     |
| -0.0642381198 |               |               |               |               |  |     |
|               | 199           | 200           | 201           | 202           |  | 203 |
| 204           | 205           | 206           | 207           | 208           |  | 209 |
| -0.0549483694 | -0.0344142866 | -0.0255988127 | -0.0125775456 | -0.0268074031 |  |     |
| -0.0393031661 | -0.0415962328 | -0.0616071191 | -0.0551445549 | -0.0680223083 |  |     |
| -0.0904328473 |               |               |               |               |  |     |
|               | 210           | 211           | 212           | 213           |  | 214 |
| 215           | 216           | 217           | 218           | 219           |  | 220 |
| -0.1090343721 | -0.1305612493 | -0.1233930240 | -0.1174907690 | -0.1338083287 |  |     |
| -0.1316767636 | -0.1076903629 | -0.1124875849 | -0.1274603324 | -0.1115638821 |  |     |
| -0.0869362784 |               |               |               |               |  |     |
|               | 221           | 222           | 223           | 224           |  | 225 |
| 226           | 227           | 228           | 229           | 230           |  | 231 |
| -0.0992560515 | -0.1028174184 | -0.0701914837 | -0.0668162391 | -0.0719261623 |  |     |
| -0.0796916918 | -0.0866889029 | -0.0886382409 | -0.0988830891 | -0.1221794281 |  |     |
| -0.1270433854 |               |               |               |               |  |     |
|               | 232           | 233           | 234           | 235           |  | 236 |
| 237           | 238           | 239           | 240           | 241           |  | 242 |
| -0.1424980991 | -0.1360980246 | -0.1309230537 | -0.1425841704 | -0.1369001812 |  |     |
| -0.1321288612 | -0.1304261904 | -0.1284985059 | -0.1237552372 | -0.1183465452 |  |     |
| -0.1212604186 |               |               |               |               |  |     |
|               | 243           | 244           | 245           | 246           |  | 247 |

Supplementary Text 9

|               |               |               |               |               |     |
|---------------|---------------|---------------|---------------|---------------|-----|
| 248           | 249           | 250           | 251           | 252           | 253 |
| -0.0962126846 | -0.0973041662 | -0.0845676472 | -0.0872247687 | -0.0856663611 |     |
| -0.0675543250 | -0.0545631970 | -0.0381822952 | -0.0385651571 | -0.0202971247 |     |
| -0.0290411343 |               |               |               |               |     |
|               | 254           | 255           | 256           | 257           | 258 |
| 259           | 260           | 261           | 262           | 263           | 264 |
| -0.0541442811 | -0.0829677518 | -0.0850956842 | -0.0955005637 | -0.0806429270 |     |
| -0.0680882492 | -0.0965049075 | -0.0986543221 | -0.0706369163 | -0.0692983963 |     |
| -0.0875790831 |               |               |               |               |     |
|               | 265           | 266           | 267           | 268           | 269 |
| 270           | 271           | 272           | 273           | 274           | 275 |
| -0.0785525608 | -0.0474384189 | -0.0374150715 | -0.0542279865 | -0.0637927890 |     |
| -0.0919175860 | -0.0933034159 | -0.0919111931 | -0.0922005228 | -0.0924299782 |     |
| -0.1068831794 |               |               |               |               |     |
|               | 276           | 277           | 278           | 279           | 280 |
| 281           | 282           | 283           | 284           | 285           | 286 |
| -0.1242738242 | -0.1120668828 | -0.1198597029 | -0.1076517657 | -0.1084917990 |     |
| -0.1132378035 | -0.1172706529 | -0.1225377261 | -0.1145243760 | -0.1163477960 |     |
| -0.1162611918 |               |               |               |               |     |
|               | 287           | 288           | 289           | 290           | 291 |
| 292           | 293           | 294           | 295           | 296           | 297 |
| -0.0987300542 | -0.0944905170 | -0.1002971422 | -0.0858523967 | -0.0642604574 |     |
| -0.0630829091 | -0.0641506444 | -0.0393314228 | -0.0206327814 | -0.0308545866 |     |
| -0.0154634999 |               |               |               |               |     |
|               | 298           | 299           | 300           | 301           | 302 |
| 303           | 304           | 305           | 306           | 307           | 308 |
| -0.0164698815 | -0.0335977967 | -0.0439812058 | -0.0596118605 | -0.0503778033 |     |
| -0.0252814337 | 0.0073697777  | 0.0457387020  | 0.0488788316  | 0.0731493922  |     |
| 0.0877083088  |               |               |               |               |     |
|               | 309           | 310           | 311           | 312           | 313 |
| 314           | 315           | 316           | 317           | 318           | 319 |
| 0.0681160191  | 0.0235312064  | 0.0024300877  | -0.0261456078 | -0.0184373946 |     |
| -0.0075825027 | -0.0085394734 | 0.0006034987  | 0.0108346511  | 0.0494587443  |     |
| 0.0306232089  |               |               |               |               |     |
|               | 320           | 321           | 322           | 323           | 324 |
| 325           | 326           | 327           | 328           | 329           | 330 |
| 0.0109649964  | 0.0543795358  | 0.0781237254  | 0.0321782736  | 0.0274683210  |     |
| 0.0746345132  | 0.0597222112  | 0.0147922755  | 0.0393079642  | 0.0649524359  |     |
| 0.0230188549  |               |               |               |               |     |
|               | 331           | 332           | 333           | 334           | 335 |
| 336           | 337           | 338           | 339           | 340           | 341 |
| -0.0073019399 | 0.0173838220  | 0.0224444944  | -0.0112624636 | -0.0388251678 |     |
| -0.0582504948 | -0.0376778895 | -0.0344500406 | -0.0179562286 | -0.0374397945 |     |
| -0.0317394241 |               |               |               |               |     |
|               | 342           | 343           | 344           | 345           | 346 |
| 347           | 348           | 349           | 350           | 351           | 352 |
| -0.0300076809 | -0.0527540249 | -0.0727575454 | -0.0793242776 | -0.0989195666 |     |
| -0.0942779510 | -0.0688165601 | -0.0602316944 | -0.0456247270 | -0.0265619692 |     |
| -0.0005123852 |               |               |               |               |     |
|               | 353           | 354           | 355           | 356           | 357 |
| 358           | 359           | 360           | 361           | 362           | 363 |
| 0.0252591363  | 0.0271054702  | 0.0434874298  | 0.0802969161  | 0.0961051476  |     |
| 0.1034650770  | 0.1470390873  | 0.1806525111  | 0.1850915945  | 0.2213873282  |     |
| 0.3071446766  |               |               |               |               |     |

Supplementary Text 9

|               |               |               |               |               |     |     |
|---------------|---------------|---------------|---------------|---------------|-----|-----|
| 369           | 364           | 365           | 366           | 367           | 368 | 374 |
| 0.2683461934  | 0.1975724238  | 0.2660014799  | 0.3269025711  | 0.3126374287  |     |     |
| 0.2238769925  | 0.1521711090  | 0.1326054324  | 0.1631624309  | 0.2548214294  |     |     |
| 0.2563916720  |               |               |               |               |     |     |
| 380           | 375           | 376           | 377           | 378           | 379 | 385 |
| 0.1742109004  | 0.1734360539  | 0.1590242095  | 0.1761893120  | 0.2124162472  |     |     |
| 0.2525098170  | 0.2042999872  | 0.1618936672  | 0.1503408468  | 0.1002891307  |     |     |
| 0.0849834833  |               |               |               |               |     |     |
| 391           | 386           | 387           | 388           | 389           | 390 | 396 |
| 0.0663809713  | 0.0444994229  | 0.0256036498  | 0.0095790759  | 0.0114603016  |     |     |
| 0.0087840466  | -0.0063232889 | -0.0095202343 | -0.0092013019 | 0.0099514554  |     |     |
| -0.0010222517 |               |               |               |               |     |     |
| 402           | 397           | 398           | 399           | 400           | 401 | 407 |
| 0.0211578320  | 0.0271488880  | 0.0135574019  | 0.0109567682  | -0.0058852565 |     |     |
| -0.0156235455 | -0.0240698377 | -0.0258918794 | -0.0172367712 | 0.0023618706  |     |     |
| 0.0058866168  |               |               |               |               |     |     |
| 413           | 408           | 409           | 410           | 411           | 412 | 418 |
| 0.0241634048  | 0.0490624181  | 0.0829303699  | 0.1353667089  | 0.1565443119  |     |     |
| 0.1248920499  | 0.1098653826  | 0.0798427389  | 0.0489246485  | 0.0450750449  |     |     |
| 0.0733974874  |               |               |               |               |     |     |
| 424           | 419           | 420           | 421           | 422           | 423 | 429 |
| 0.0434944585  | 0.0358006299  | 0.0629312318  | 0.0875116520  | 0.0817311765  |     |     |
| 0.0928516751  | 0.0558134302  | 0.0665166349  | 0.0496770776  | 0.0349649730  |     |     |
| 0.0168538421  |               |               |               |               |     |     |
| 435           | 430           | 431           | 432           | 433           | 434 | 440 |
| 0.0136765954  | 0.0061601925  | -0.0043673962 | 0.0237731543  | 0.0441678199  |     |     |
| 0.0306847350  | 0.0506915966  | 0.0359170517  | 0.0437240216  | 0.0430271636  |     |     |
| 0.0671898633  |               |               |               |               |     |     |
| 446           | 441           | 442           | 443           | 444           | 445 | 451 |
| 0.0931085285  | 0.0711043901  | 0.0742145898  | 0.1232341777  | 0.1226803480  |     |     |
| 0.0964052403  | 0.1330474392  | 0.2091930172  | 0.2041432972  | 0.2495299548  |     |     |
| 0.3432205113  |               |               |               |               |     |     |
| 457           | 452           | 453           | 454           | 455           | 456 | 462 |
| 0.3070868435  | 0.3143085633  | 0.4288928080  | 0.3285298900  | 0.3043996856  |     |     |
| 0.1650233642  | 0.1596039291  | 0.0965727633  | 0.0929713699  | 0.0835259832  |     |     |
| 0.0643563984  |               |               |               |               |     |     |
| 468           | 463           | 464           | 465           | 466           | 467 | 473 |
| 0.0325710039  | 0.0144811515  | 0.0068166088  | -0.0073919816 | -0.0330675387 |     |     |
| -0.0469676636 | -0.1061504107 | -0.1215791401 | -0.1350503703 | -0.1146760667 |     |     |
| -0.1072429976 |               |               |               |               |     |     |
| 479           | 474           | 475           | 476           | 477           | 478 | 484 |
| -0.0927571355 | -0.1420863759 | -0.1424196272 | -0.1764351567 | -0.1608338381 |     |     |
| -0.1470993735 | -0.1542835809 | -0.1406617939 | -0.1146502570 | -0.0914499109 |     |     |

Supplementary Text 9

|               |               |               |               |               |     |  |  |
|---------------|---------------|---------------|---------------|---------------|-----|--|--|
| -0.0578300712 |               |               |               |               |     |  |  |
|               | 485           | 486           | 487           | 488           | 489 |  |  |
| 490           | 491           | 492           | 493           | 494           | 495 |  |  |
| -0.0314847705 | -0.0671410488 | -0.0624377143 | -0.1002685961 | -0.1271987673 |     |  |  |
| -0.1240260302 | -0.1634652407 | -0.1612523061 | -0.1186091892 | -0.0754226915 |     |  |  |
| -0.0592323106 |               |               |               |               |     |  |  |
|               | 496           | 497           | 498           | 499           | 500 |  |  |
| 501           | 502           | 503           | 504           | 505           | 506 |  |  |
| -0.0225995366 | -0.0257522160 | -0.0198635918 | -0.0090122475 | -0.0148795599 |     |  |  |
| -0.0279569235 | -0.0706587035 | -0.0452036638 | -0.0845053904 | -0.1146106506 |     |  |  |
| -0.1668584225 |               |               |               |               |     |  |  |
|               | 507           | 508           | 509           | 510           | 511 |  |  |
| 512           | 513           | 514           | 515           | 516           | 517 |  |  |
| -0.1345954109 | -0.1441409527 | -0.1337711788 | -0.0957938300 | -0.0892332199 |     |  |  |
| -0.0622860823 | -0.0311977165 | -0.0205343028 | 0.0032827488  | 0.0343408935  |     |  |  |
| 0.0036767469  |               |               |               |               |     |  |  |
|               | 518           | 519           | 520           | 521           | 522 |  |  |
| 523           | 524           | 525           | 526           | 527           | 528 |  |  |
| 0.0161505709  | 0.0538400911  | 0.0612447925  | 0.0888521216  | 0.0674385823  |     |  |  |
| 0.0607435924  | 0.0822331871  | 0.0706725911  | 0.0812299065  | 0.0663070820  |     |  |  |
| 0.0345159744  |               |               |               |               |     |  |  |
|               | 529           | 530           | 531           | 532           | 533 |  |  |
| 534           | 535           | 536           | 537           | 538           | 539 |  |  |
| 0.0332936953  | 0.0796970105  | 0.0711158495  | 0.0314955783  | 0.0769203753  |     |  |  |
| 0.0580511376  | 0.0752519093  | 0.0543799807  | 0.0102345422  | -0.0083787783 |     |  |  |
| -0.0182994287 |               |               |               |               |     |  |  |
|               | 540           | 541           | 542           | 543           | 544 |  |  |
| 545           | 546           | 547           | 548           | 549           | 550 |  |  |
| -0.0435387973 | -0.0822499362 | -0.0977644851 | -0.0779757709 | -0.0884829871 |     |  |  |
| -0.0577976529 | -0.0178448703 | 0.0016621151  | 0.0385127044  | -0.0193755800 |     |  |  |
| 0.0046468647  |               |               |               |               |     |  |  |
|               | 551           | 552           | 553           | 554           | 555 |  |  |
| 556           | 557           | 558           | 559           | 560           | 561 |  |  |
| 0.0400026472  | 0.0475643153  | 0.0426558773  | 0.0395804233  | 0.0391144390  |     |  |  |
| 0.0239005023  | 0.0141591421  | -0.0143697491 | -0.0242184412 | -0.0544811279 |     |  |  |
| -0.0249198716 |               |               |               |               |     |  |  |
|               | 562           | 563           | 564           | 565           | 566 |  |  |
| 567           | 568           | 569           | 570           | 571           | 572 |  |  |
| -0.0362887470 | 0.0066932943  | 0.0090696045  | -0.0128565173 | 0.0199391567  |     |  |  |
| 0.0017267810  | 0.0010820511  | 0.0386682603  | 0.0339396128  | 0.0341458690  |     |  |  |
| -0.0117881356 |               |               |               |               |     |  |  |
|               | 573           | 574           | 575           | 576           |     |  |  |
| -0.0415439173 | -0.0740974098 | -0.1047922843 | -0.1251241471 |               |     |  |  |

Q9ZSP9\_40.1ns (DCCM)

|              |              |              |              |              |    |  |
|--------------|--------------|--------------|--------------|--------------|----|--|
|              | 1            | 2            | 3            | 4            | 5  |  |
| 6            | 7            | 8            | 9            | 10           | 11 |  |
| 1.0000000000 | 0.5838595796 | 0.4154414395 | 0.3473103534 | 0.3173494637 |    |  |
| 0.2997366306 | 0.2316186642 | 0.2042338606 | 0.2086222350 | 0.1634184522 |    |  |
| 0.1194887129 |              |              |              |              |    |  |
|              | 12           | 13           | 14           | 15           | 16 |  |
| 17           | 18           | 19           | 20           | 21           | 22 |  |

Supplementary Text 9

|               |               |               |               |               |     |
|---------------|---------------|---------------|---------------|---------------|-----|
| 0.1326549156  | 0.1113752103  | 0.0764163088  | 0.0770178208  | 0.0782427034  |     |
| 0.0515569880  | 0.0315948270  | 0.0180902039  | 0.0119858803  | 0.0057574819  |     |
| 0.0121384572  |               |               |               |               |     |
|               | 23            | 24            | 25            | 26            | 27  |
| 28            | 29            | 30            | 31            | 32            | 33  |
| 0.0167615398  | 0.0137926141  | 0.0258538555  | 0.0467747567  | 0.0656284495  |     |
| 0.0720290049  | 0.0565906703  | 0.0366107317  | 0.0261985597  | 0.0291856002  |     |
| 0.0187412903  |               |               |               |               |     |
|               | 34            | 35            | 36            | 37            | 38  |
| 39            | 40            | 41            | 42            | 43            | 44  |
| 0.0214983458  | 0.0101793474  | 0.0114902548  | 0.0004284099  | -0.0046497287 |     |
| -0.0208239826 | -0.0200914769 | -0.0160985443 | -0.0230798496 | -0.0290281647 |     |
| -0.0305812510 |               |               |               |               |     |
|               | 45            | 46            | 47            | 48            | 49  |
| 50            | 51            | 52            | 53            | 54            | 55  |
| -0.0259903557 | -0.0251890528 | -0.0141650872 | -0.0117161497 | -0.0059735898 |     |
| 0.0182971065  | 0.0243210653  | 0.0331685706  | 0.0550095426  | 0.0554182488  |     |
| 0.0350443263  |               |               |               |               |     |
|               | 56            | 57            | 58            | 59            | 60  |
| 61            | 62            | 63            | 64            | 65            | 66  |
| 0.0243989943  | 0.0073737960  | -0.0005151268 | -0.0114664373 | -0.0321904872 |     |
| -0.0331066861 | -0.0034919968 | -0.0105992158 | -0.0396349803 | -0.0214976736 |     |
| 0.0036988921  |               |               |               |               |     |
|               | 67            | 68            | 69            | 70            | 71  |
| 72            | 73            | 74            | 75            | 76            | 77  |
| -0.0225164114 | -0.0416893464 | -0.0031630070 | 0.0096310756  | -0.0264339372 |     |
| -0.0193717614 | 0.0237378126  | 0.0149181265  | -0.0190672633 | -0.0015123208 |     |
| 0.0449638936  |               |               |               |               |     |
|               | 78            | 79            | 80            | 81            | 82  |
| 83            | 84            | 85            | 86            | 87            | 88  |
| 0.0412800348  | 0.0576116614  | 0.0783432133  | 0.0799439872  | 0.0901561106  |     |
| 0.1116916564  | 0.0820519073  | 0.0629772910  | 0.0781395262  | 0.0451572562  |     |
| 0.0297323122  |               |               |               |               |     |
|               | 89            | 90            | 91            | 92            | 93  |
| 94            | 95            | 96            | 97            | 98            | 99  |
| 0.0418892878  | 0.0360350417  | 0.0069276543  | 0.0023341148  | 0.0127834065  |     |
| -0.0129765484 | -0.0294873534 | -0.0191398371 | -0.0227459883 | -0.0512354095 |     |
| -0.0550842383 |               |               |               |               |     |
|               | 100           | 101           | 102           | 103           | 104 |
| 105           | 106           | 107           | 108           | 109           | 110 |
| -0.0385856546 | -0.0548935084 | -0.0645187538 | -0.0517371275 | -0.0510490576 |     |
| -0.0669817234 | -0.0475278296 | -0.0622049141 | -0.0637330610 | -0.0823322527 |     |
| -0.0794009623 |               |               |               |               |     |
|               | 111           | 112           | 113           | 114           | 115 |
| 116           | 117           | 118           | 119           | 120           | 121 |
| -0.0719578469 | -0.0532641646 | -0.0446833002 | -0.0246180377 | -0.0149208089 |     |
| -0.0038253326 | -0.0048537609 | 0.0007155160  | 0.0010628543  | 0.0093227988  |     |
| 0.0183385381  |               |               |               |               |     |
|               | 122           | 123           | 124           | 125           | 126 |
| 127           | 128           | 129           | 130           | 131           | 132 |
| 0.0259990694  | 0.0298831231  | 0.0321802029  | 0.0385570928  | 0.0366471657  |     |
| 0.0388140642  | 0.0335536594  | 0.0369971251  | 0.0381724822  | 0.0282600080  |     |
| 0.0241781326  |               |               |               |               |     |
|               | 133           | 134           | 135           | 136           | 137 |

Supplementary Text 9

|               |               |               |               |               |     |
|---------------|---------------|---------------|---------------|---------------|-----|
| 138           | 139           | 140           | 141           | 142           | 143 |
| 0.0114677224  | -0.0010944026 | -0.0028580546 | -0.0162796035 | -0.0208341829 |     |
| -0.0375447978 | -0.0539009846 | -0.0671765543 | -0.0753740675 | -0.0734751368 |     |
| -0.0621910568 |               |               |               |               |     |
|               | 144           | 145           | 146           | 147           | 148 |
| 149           | 150           | 151           | 152           | 153           | 154 |
| -0.0797299118 | -0.0942376816 | -0.1052580822 | -0.1054226538 | -0.0877239176 |     |
| -0.0751271611 | -0.1103731259 | -0.1239176275 | -0.0875209992 | -0.0865810233 |     |
| -0.1223924152 |               |               |               |               |     |
|               | 155           | 156           | 157           | 158           | 159 |
| 160           | 161           | 162           | 163           | 164           | 165 |
| -0.1075099933 | -0.0795486394 | -0.0955720540 | -0.1165852501 | -0.0846674401 |     |
| -0.0681860140 | -0.0885201160 | -0.0812253405 | -0.0588015552 | -0.0598947430 |     |
| -0.0782331306 |               |               |               |               |     |
|               | 166           | 167           | 168           | 169           | 170 |
| 171           | 172           | 173           | 174           | 175           | 176 |
| -0.0576051818 | -0.0458828527 | -0.0512110233 | -0.0631202894 | -0.0569737072 |     |
| -0.0622458625 | -0.0732434519 | -0.0912938064 | -0.0823874629 | -0.0919558216 |     |
| -0.1162389190 |               |               |               |               |     |
|               | 177           | 178           | 179           | 180           | 181 |
| 182           | 183           | 184           | 185           | 186           | 187 |
| -0.1147621722 | -0.1073749652 | -0.1234708646 | -0.1328472768 | -0.1284927414 |     |
| -0.1266034873 | -0.1405593697 | -0.1314597647 | -0.1261822188 | -0.1321237264 |     |
| -0.1173317966 |               |               |               |               |     |
|               | 188           | 189           | 190           | 191           | 192 |
| 193           | 194           | 195           | 196           | 197           | 198 |
| -0.1149558577 | -0.1030613164 | -0.0939093160 | -0.0672736448 | -0.0573347812 |     |
| -0.0533281090 | -0.0691042547 | -0.0524957855 | -0.0388575919 | -0.0421040014 |     |
| -0.0317997615 |               |               |               |               |     |
|               | 199           | 200           | 201           | 202           | 203 |
| 204           | 205           | 206           | 207           | 208           | 209 |
| -0.0083738826 | -0.0104542624 | -0.0147955148 | 0.0016875703  | 0.0108908476  |     |
| 0.0229408768  | 0.0173008776  | 0.0061463472  | -0.0100929290 | -0.0123139602 |     |
| -0.0356901454 |               |               |               |               |     |
|               | 210           | 211           | 212           | 213           | 214 |
| 215           | 216           | 217           | 218           | 219           | 220 |
| -0.0649795075 | -0.0780946530 | -0.0983012820 | -0.1041533276 | -0.1344238784 |     |
| -0.1315816623 | -0.1116246510 | -0.1382729520 | -0.1469201554 | -0.1309927181 |     |
| -0.1201440042 |               |               |               |               |     |
|               | 221           | 222           | 223           | 224           | 225 |
| 226           | 227           | 228           | 229           | 230           | 231 |
| -0.1346553705 | -0.1421876190 | -0.1117515332 | -0.1021530302 | -0.1040886005 |     |
| -0.1215290519 | -0.1222286896 | -0.1340173308 | -0.1294486937 | -0.1410427215 |     |
| -0.1484006727 |               |               |               |               |     |
|               | 232           | 233           | 234           | 235           | 236 |
| 237           | 238           | 239           | 240           | 241           | 242 |
| -0.1474251809 | -0.1368041870 | -0.1419828910 | -0.1475894254 | -0.1378215955 |     |
| -0.1240761393 | -0.1202578426 | -0.1020278398 | -0.1019758248 | -0.0954416688 |     |
| -0.0752050347 |               |               |               |               |     |
|               | 243           | 244           | 245           | 246           | 247 |
| 248           | 249           | 250           | 251           | 252           | 253 |
| -0.0733708220 | -0.0694883598 | -0.0459041666 | -0.0347428377 | -0.0147721919 |     |
| -0.0021238528 | -0.0010664353 | -0.0009608805 | 0.0011638162  | 0.0191384818  |     |
| 0.0016340833  |               |               |               |               |     |

Supplementary Text 9

|               |               |               |               |               |     |     |
|---------------|---------------|---------------|---------------|---------------|-----|-----|
| 259           | 254           | 255           | 256           | 257           | 258 | 264 |
| -0.0122056616 | 260           | 261           | 262           | 263           |     |     |
| -0.0547730813 | -0.0488698461 | -0.0617699672 | -0.0768384150 | -0.0552058890 |     |     |
| -0.1179451284 | -0.0938642348 | -0.0996000550 | -0.0776496040 | -0.0916217906 |     |     |
| 270           | 265           | 266           | 267           | 268           | 269 |     |
| -0.1093163050 | 271           | 272           | 273           | 274           |     | 275 |
| -0.1021504772 | -0.1008153254 | -0.1188900184 | -0.1246939758 | -0.1025305077 |     |     |
| -0.1318902493 | -0.1053492194 | -0.1210945693 | -0.1239513881 | -0.1284868938 |     |     |
| 281           | 276           | 277           | 278           | 279           | 280 |     |
| -0.1124158673 | 282           | 283           | 284           | 285           |     | 286 |
| -0.1048126143 | -0.0996288089 | -0.1143882610 | -0.1063046997 | -0.1092198207 |     |     |
| -0.0853902672 | -0.1035751109 | -0.1123854780 | -0.1033839172 | -0.0896629449 |     |     |
| 292           | 287           | 288           | 289           | 290           | 291 |     |
| -0.0686537314 | 293           | 294           | 295           | 296           |     | 297 |
| 0.0021879394  | -0.0529230461 | -0.0451628492 | -0.0309526879 | -0.0065475194 |     |     |
| 0.0298430545  | 0.0016152884  | 0.0256433704  | 0.0390628087  | 0.0320749783  |     |     |
| 303           | 298           | 299           | 300           | 301           | 302 |     |
| 0.0107428161  | 304           | 305           | 306           | 307           |     | 308 |
| 0.0315984108  | -0.0078514676 | -0.0199668945 | -0.0041873183 | 0.0059012745  |     |     |
| 0.1147739240  | 0.0639427033  | 0.0961388638  | 0.0805581527  | 0.1013648021  |     |     |
| 314           | 309           | 310           | 311           | 312           | 313 |     |
| 0.1128556045  | 315           | 316           | 317           | 318           |     | 319 |
| 0.0859427364  | 0.0924940254  | 0.0771109186  | 0.0485466668  | 0.0539677034  |     |     |
| 0.0892319494  | 0.0779504006  | 0.0939364402  | 0.0996022148  | 0.1282852611  |     |     |
| 325           | 320           | 321           | 322           | 323           | 324 |     |
| 0.0847364023  | 326           | 327           | 328           | 329           |     | 330 |
| 0.1016790738  | 0.1232057397  | 0.1319599587  | 0.0777218475  | 0.0724056949  |     |     |
| -0.0042456904 | 0.0651302730  | 0.0213770715  | 0.0380034123  | 0.0388046981  |     |     |
| 336           | 331           | 332           | 333           | 334           | 335 |     |
| -0.0306517008 | 337           | 338           | 339           | 340           |     | 341 |
| -0.0755983593 | -0.0220720485 | -0.0234620101 | -0.0530068741 | -0.0612412957 |     |     |
| -0.0448697554 | -0.0631125748 | -0.0782132985 | -0.0639631673 | -0.0576640308 |     |     |
| 347           | 342           | 343           | 344           | 345           | 346 |     |
| -0.0502835781 | 348           | 349           | 350           | 351           |     | 352 |
| -0.0305321297 | -0.0638857959 | -0.0596289391 | -0.0566802663 | -0.0423770321 |     |     |
| 0.0171304187  | -0.0232034588 | -0.0355797210 | -0.0201915368 | -0.0125884005 |     |     |
| 358           | 353           | 354           | 355           | 356           | 357 |     |
| 0.0354805445  | 359           | 360           | 361           | 362           |     | 363 |
| 0.1313973094  | 0.0392806536  | 0.0665181080  | 0.0982502333  | 0.1223798885  |     |     |
| 0.3541336753  | 0.1895833280  | 0.2067471898  | 0.2235274253  | 0.2744253671  |     |     |
| 369           | 364           | 365           | 366           | 367           | 368 |     |
| 0.3033206564  | 370           | 371           | 372           | 373           |     | 374 |
| 0.1962174440  | 0.2784161014  | 0.3665645229  | 0.3510874622  | 0.2804258534  |     |     |
|               | 0.1333561454  | 0.1679853935  | 0.1909607741  | 0.2422431378  |     |     |

Supplementary Text 9

|               |               |               |               |               |     |  |
|---------------|---------------|---------------|---------------|---------------|-----|--|
| 0.3010963584  |               |               |               |               |     |  |
|               | 375           | 376           | 377           | 378           | 379 |  |
| 380           | 381           | 382           | 383           | 384           | 385 |  |
| 0.2294128471  | 0.2199414616  | 0.2017280345  | 0.2041708994  | 0.2420291896  |     |  |
| 0.2764257127  | 0.3083574187  | 0.2786746375  | 0.2357148429  | 0.1723713997  |     |  |
| 0.1455911076  |               |               |               |               |     |  |
|               | 386           | 387           | 388           | 389           | 390 |  |
| 391           | 392           | 393           | 394           | 395           | 396 |  |
| 0.1243929293  | 0.1184755049  | 0.0907319231  | 0.0743086873  | 0.0496822355  |     |  |
| 0.0408635288  | 0.0490612082  | 0.0450285540  | 0.0334296008  | 0.0287704210  |     |  |
| 0.0096143021  |               |               |               |               |     |  |
|               | 397           | 398           | 399           | 400           | 401 |  |
| 402           | 403           | 404           | 405           | 406           | 407 |  |
| 0.0237790557  | 0.0311823459  | 0.0396275678  | 0.0407628222  | 0.0532931827  |     |  |
| 0.0369653789  | 0.0353216933  | 0.0449412272  | 0.0469547188  | 0.0482376628  |     |  |
| 0.0427281350  |               |               |               |               |     |  |
|               | 408           | 409           | 410           | 411           | 412 |  |
| 413           | 414           | 415           | 416           | 417           | 418 |  |
| 0.0532142018  | 0.0691295911  | 0.0868198991  | 0.1490542059  | 0.1602496842  |     |  |
| 0.1374528679  | 0.1653586828  | 0.1543578977  | 0.1374236244  | 0.1549254601  |     |  |
| 0.1473766705  |               |               |               |               |     |  |
|               | 419           | 420           | 421           | 422           | 423 |  |
| 424           | 425           | 426           | 427           | 428           | 429 |  |
| 0.1115737911  | 0.0913824382  | 0.1062053468  | 0.1408960507  | 0.1423540777  |     |  |
| 0.1471715531  | 0.1249627453  | 0.1281245911  | 0.1127742862  | 0.0976880394  |     |  |
| 0.0785924660  |               |               |               |               |     |  |
|               | 430           | 431           | 432           | 433           | 434 |  |
| 435           | 436           | 437           | 438           | 439           | 440 |  |
| 0.0902105236  | 0.0873764644  | 0.0888424663  | 0.1253629585  | 0.1290467237  |     |  |
| 0.1071651012  | 0.1164888930  | 0.0736511331  | 0.0565094879  | 0.0494659467  |     |  |
| 0.1004656539  |               |               |               |               |     |  |
|               | 441           | 442           | 443           | 444           | 445 |  |
| 446           | 447           | 448           | 449           | 450           | 451 |  |
| 0.1066890151  | 0.0672978730  | 0.0777901658  | 0.1277890656  | 0.1232233412  |     |  |
| 0.0908350829  | 0.1239185052  | 0.1873518820  | 0.1472852887  | 0.1146453373  |     |  |
| 0.1399439227  |               |               |               |               |     |  |
|               | 452           | 453           | 454           | 455           | 456 |  |
| 457           | 458           | 459           | 460           | 461           | 462 |  |
| 0.2258691083  | 0.2951956886  | 0.1902565382  | 0.2257599583  | 0.2904576522  |     |  |
| 0.2847367599  | 0.3676115543  | 0.5264337199  | 0.4648977822  | 0.3629173596  |     |  |
| 0.2540037613  |               |               |               |               |     |  |
|               | 463           | 464           | 465           | 466           | 467 |  |
| 468           | 469           | 470           | 471           | 472           | 473 |  |
| 0.2786022476  | 0.2373065980  | 0.1944058465  | 0.1542814700  | 0.1323027427  |     |  |
| 0.1029170765  | 0.0790875054  | 0.0559171016  | 0.0442120954  | 0.0288602341  |     |  |
| 0.0040258934  |               |               |               |               |     |  |
|               | 474           | 475           | 476           | 477           | 478 |  |
| 479           | 480           | 481           | 482           | 483           | 484 |  |
| -0.0030085007 | -0.0171245432 | -0.0243835319 | -0.0229866069 | -0.0295333274 |     |  |
| -0.0473380236 | -0.0447849147 | -0.0475728919 | -0.0713650530 | -0.0765628931 |     |  |
| -0.1038750046 |               |               |               |               |     |  |
|               | 485           | 486           | 487           | 488           | 489 |  |
| 490           | 491           | 492           | 493           | 494           | 495 |  |
| -0.1069483393 | -0.0882681571 | -0.0940877803 | -0.0460292814 | -0.0506709229 |     |  |



Supplementary Text 9

|               |               |               |               |               |     |  |
|---------------|---------------|---------------|---------------|---------------|-----|--|
| -0.0977582766 | -0.0687643052 | -0.0817449147 | -0.0381298061 | -0.0233743559 |     |  |
| -0.0712923049 |               |               |               |               |     |  |
|               | 496           | 497           | 498           | 499           | 500 |  |
| 501           | 502           | 503           | 504           | 505           | 506 |  |
| -0.0370310081 | -0.0753363919 | -0.0316159906 | -0.0660370215 | -0.0299282366 |     |  |
| -0.0078176728 | -0.0113854991 | 0.0146458298  | 0.0152310058  | 0.0263561175  |     |  |
| 0.0254388629  |               |               |               |               |     |  |
|               | 507           | 508           | 509           | 510           | 511 |  |
| 512           | 513           | 514           | 515           | 516           | 517 |  |
| 0.0294287738  | 0.0312649789  | 0.0329191720  | 0.0319549198  | 0.0282418927  |     |  |
| 0.0096213839  | -0.0312291443 | -0.0602514882 | -0.0961967832 | -0.1428734815 |     |  |
| -0.1692727805 |               |               |               |               |     |  |
|               | 518           | 519           | 520           | 521           | 522 |  |
| 523           | 524           | 525           | 526           | 527           | 528 |  |
| -0.2084003518 | -0.2004444806 | -0.2154607308 | -0.1892847980 | -0.1872600251 |     |  |
| -0.1526904701 | -0.1479135345 | -0.1163375981 | -0.0773663013 | -0.0558156912 |     |  |
| -0.0988394881 |               |               |               |               |     |  |
|               | 529           | 530           | 531           | 532           | 533 |  |
| 534           | 535           | 536           | 537           | 538           | 539 |  |
| -0.1088564097 | -0.0656973519 | -0.0273549109 | -0.0422506404 | -0.0002808340 |     |  |
| 0.0026775641  | 0.0525363929  | 0.0440388640  | 0.0853713077  | 0.1062262165  |     |  |
| 0.0993399529  |               |               |               |               |     |  |
|               | 540           | 541           | 542           | 543           | 544 |  |
| 545           | 546           | 547           | 548           | 549           | 550 |  |
| 0.0822409004  | 0.0514255968  | 0.0097343288  | 0.0070445291  | -0.0470684675 |     |  |
| -0.1190477838 | -0.1559166475 | -0.1354582231 | -0.1412622132 | -0.1527890350 |     |  |
| -0.1880409327 |               |               |               |               |     |  |
|               | 551           | 552           | 553           | 554           | 555 |  |
| 556           | 557           | 558           | 559           | 560           | 561 |  |
| -0.2158601447 | -0.2090947103 | -0.2042470085 | -0.1457466978 | -0.0985460738 |     |  |
| -0.0487012399 | -0.0286796178 | 0.0234074785  | 0.0525779986  | 0.0884251563  |     |  |
| 0.0790455915  |               |               |               |               |     |  |
|               | 562           | 563           | 564           | 565           | 566 |  |
| 567           | 568           | 569           | 570           | 571           | 572 |  |
| 0.0584473299  | 0.0420902529  | 0.0405889967  | 0.0449287191  | 0.0366434254  |     |  |
| 0.0252699968  | 0.0554153868  | 0.0329142951  | 0.0350958743  | 0.0232186823  |     |  |
| -0.0208903984 |               |               |               |               |     |  |
|               | 573           | 574           | 575           | 576           | 577 |  |
| 578           | 579           | 580           | 581           | 582           | 583 |  |
| -0.0267187946 | -0.0730675911 | -0.0683060390 | -0.0960556148 | -0.0567493239 |     |  |
| -0.0460754465 | -0.0909032726 | -0.1226953661 | -0.1588513265 | -0.1501657523 |     |  |
| -0.1617400214 |               |               |               |               |     |  |
|               | 584           | 585           |               |               |     |  |
| -0.1735560919 | -0.1643225355 |               |               |               |     |  |

Q9ZSP9\_40.1ns (MATRIX)

|              |              |              |              |              |    |  |
|--------------|--------------|--------------|--------------|--------------|----|--|
|              | 1            | 2            | 3            | 4            | 5  |  |
| 6            | 7            | 8            | 9            | 10           | 11 |  |
| 5.838596e-01 | 1.000000e+00 | 6.439711e-01 | 5.142996e-01 | 4.744012e-01 |    |  |
| 4.397956e-01 | 3.386895e-01 | 2.996427e-01 | 3.039734e-01 | 2.452531e-01 |    |  |
| 1.868322e-01 |              |              |              |              |    |  |
|              | 12           | 13           | 14           | 15           | 16 |  |

Supplementary Text 9

|               |               |               |               |               |     |
|---------------|---------------|---------------|---------------|---------------|-----|
| 17            | 18            | 19            | 20            | 21            | 22  |
| 2.028305e-01  | 1.720435e-01  | 1.285601e-01  | 1.311149e-01  | 1.290546e-01  |     |
| 9.163617e-02  | 6.767542e-02  | 5.235785e-02  | 4.378968e-02  | 3.393820e-02  |     |
| 4.004868e-02  |               |               |               |               |     |
|               | 23            | 24            | 25            | 26            | 27  |
| 28            | 29            | 30            | 31            | 32            | 33  |
| 4.461825e-02  | 4.182322e-02  | 5.645656e-02  | 8.617418e-02  | 1.085908e-01  |     |
| 1.174677e-01  | 9.746123e-02  | 6.745548e-02  | 5.418860e-02  | 5.874272e-02  |     |
| 5.014209e-02  |               |               |               |               |     |
|               | 34            | 35            | 36            | 37            | 38  |
| 39            | 40            | 41            | 42            | 43            | 44  |
| 5.272511e-02  | 3.732288e-02  | 3.890553e-02  | 2.436504e-02  | 1.885194e-02  |     |
| -7.592551e-04 | -8.415642e-04 | -2.469355e-04 | -9.917674e-03 | -1.511839e-02 |     |
| -1.774802e-02 |               |               |               |               |     |
|               | 45            | 46            | 47            | 48            | 49  |
| 50            | 51            | 52            | 53            | 54            | 55  |
| -9.070653e-03 | -6.700592e-03 | 6.518157e-03  | 1.264622e-02  | 1.905950e-02  |     |
| 4.898107e-02  | 5.098406e-02  | 5.971307e-02  | 8.682896e-02  | 8.426879e-02  |     |
| 5.975640e-02  |               |               |               |               |     |
|               | 56            | 57            | 58            | 59            | 60  |
| 61            | 62            | 63            | 64            | 65            | 66  |
| 5.019913e-02  | 2.812844e-02  | 1.922895e-02  | 4.935625e-05  | -2.454427e-02 |     |
| -3.122824e-02 | 5.052121e-03  | 3.428943e-03  | -3.262074e-02 | -1.675391e-02 |     |
| 1.819418e-02  |               |               |               |               |     |
|               | 67            | 68            | 69            | 70            | 71  |
| 72            | 73            | 74            | 75            | 76            | 77  |
| -8.041422e-03 | -3.548828e-02 | 9.208128e-03  | 3.246448e-02  | -9.748657e-03 |     |
| -3.061742e-03 | 5.269637e-02  | 4.548063e-02  | 9.456546e-04  | 2.120897e-02  |     |
| 8.406575e-02  |               |               |               |               |     |
|               | 78            | 79            | 80            | 81            | 82  |
| 83            | 84            | 85            | 86            | 87            | 88  |
| 7.906323e-02  | 1.006613e-01  | 1.257403e-01  | 1.219102e-01  | 1.419759e-01  |     |
| 1.703936e-01  | 1.297496e-01  | 1.060199e-01  | 1.298848e-01  | 8.535536e-02  |     |
| 6.749577e-02  |               |               |               |               |     |
|               | 89            | 90            | 91            | 92            | 93  |
| 94            | 95            | 96            | 97            | 98            | 99  |
| 8.563549e-02  | 7.654227e-02  | 3.906847e-02  | 3.346414e-02  | 4.593197e-02  |     |
| 1.151946e-02  | -6.089422e-03 | 7.605676e-03  | 4.398829e-04  | -3.730990e-02 |     |
| -3.979907e-02 |               |               |               |               |     |
|               | 100           | 101           | 102           | 103           | 104 |
| 105           | 106           | 107           | 108           | 109           | 110 |
| -2.077795e-02 | -4.544980e-02 | -5.464316e-02 | -3.713880e-02 | -4.108618e-02 |     |
| -6.231432e-02 | -4.306056e-02 | -6.105732e-02 | -6.678219e-02 | -8.870928e-02 |     |
| -8.189529e-02 |               |               |               |               |     |
|               | 111           | 112           | 113           | 114           | 115 |
| 116           | 117           | 118           | 119           | 120           | 121 |
| -7.128511e-02 | -4.665321e-02 | -3.912363e-02 | -1.386401e-02 | 2.728092e-03  |     |
| 1.745056e-02  | 1.238413e-02  | 1.617574e-02  | 1.329567e-02  | 2.726165e-02  |     |
| 4.164428e-02  |               |               |               |               |     |
|               | 122           | 123           | 124           | 125           | 126 |
| 127           | 128           | 129           | 130           | 131           | 132 |
| 4.853996e-02  | 5.241187e-02  | 5.989076e-02  | 7.037334e-02  | 6.972105e-02  |     |
| 7.134504e-02  | 6.419971e-02  | 6.964236e-02  | 6.913186e-02  | 5.587527e-02  |     |
| 5.062545e-02  |               |               |               |               |     |

Supplementary Text 9

|               |               |               |               |               |     |  |
|---------------|---------------|---------------|---------------|---------------|-----|--|
|               | 133           | 134           | 135           | 136           | 137 |  |
| 138           | 139           | 140           | 141           | 142           | 143 |  |
| 3.347713e-02  | 1.745704e-02  | 1.876934e-02  | 6.419130e-04  | -6.624615e-03 |     |  |
| -3.012599e-02 | -5.156632e-02 | -7.137335e-02 | -8.076844e-02 | -8.189339e-02 |     |  |
| -7.004435e-02 |               |               |               |               |     |  |
|               | 144           | 145           | 146           | 147           | 148 |  |
| 149           | 150           | 151           | 152           | 153           | 154 |  |
| -9.105753e-02 | -1.118756e-01 | -1.235453e-01 | -1.293944e-01 | -1.080653e-01 |     |  |
| -8.470572e-02 | -1.245443e-01 | -1.455461e-01 | -9.930038e-02 | -9.040626e-02 |     |  |
| -1.340809e-01 |               |               |               |               |     |  |
|               | 155           | 156           | 157           | 158           | 159 |  |
| 160           | 161           | 162           | 163           | 164           | 165 |  |
| -1.199340e-01 | -7.861581e-02 | -9.412111e-02 | -1.227960e-01 | -8.578202e-02 |     |  |
| -5.989652e-02 | -8.597158e-02 | -8.044896e-02 | -4.966689e-02 | -5.090394e-02 |     |  |
| -7.621411e-02 |               |               |               |               |     |  |
|               | 166           | 167           | 168           | 169           | 170 |  |
| 171           | 172           | 173           | 174           | 175           | 176 |  |
| -5.607894e-02 | -4.220823e-02 | -4.951393e-02 | -6.460142e-02 | -5.800217e-02 |     |  |
| -6.020700e-02 | -7.015962e-02 | -9.294976e-02 | -8.097585e-02 | -9.062493e-02 |     |  |
| -1.225480e-01 |               |               |               |               |     |  |
|               | 177           | 178           | 179           | 180           | 181 |  |
| 182           | 183           | 184           | 185           | 186           | 187 |  |
| -1.225652e-01 | -1.132074e-01 | -1.340699e-01 | -1.495078e-01 | -1.435047e-01 |     |  |
| -1.410624e-01 | -1.638916e-01 | -1.550586e-01 | -1.471676e-01 | -1.581528e-01 |     |  |
| -1.463419e-01 |               |               |               |               |     |  |
|               | 188           | 189           | 190           | 191           | 192 |  |
| 193           | 194           | 195           | 196           | 197           | 198 |  |
| -1.411299e-01 | -1.259033e-01 | -1.176565e-01 | -8.654151e-02 | -7.436337e-02 |     |  |
| -6.572195e-02 | -8.199110e-02 | -6.331594e-02 | -4.585795e-02 | -4.320970e-02 |     |  |
| -3.044463e-02 |               |               |               |               |     |  |
|               | 199           | 200           | 201           | 202           | 203 |  |
| 204           | 205           | 206           | 207           | 208           | 209 |  |
| -6.952839e-03 | -5.644757e-03 | -1.465003e-02 | 3.496420e-03  | 1.452381e-02  |     |  |
| 2.689209e-02  | 2.049051e-02  | 2.667056e-03  | -1.948740e-02 | -2.943241e-02 |     |  |
| -5.695245e-02 |               |               |               |               |     |  |
|               | 210           | 211           | 212           | 213           | 214 |  |
| 215           | 216           | 217           | 218           | 219           | 220 |  |
| -9.275253e-02 | -1.117874e-01 | -1.343494e-01 | -1.338687e-01 | -1.675215e-01 |     |  |
| -1.690180e-01 | -1.416816e-01 | -1.661334e-01 | -1.799071e-01 | -1.631201e-01 |     |  |
| -1.418277e-01 |               |               |               |               |     |  |
|               | 221           | 222           | 223           | 224           | 225 |  |
| 226           | 227           | 228           | 229           | 230           | 231 |  |
| -1.567427e-01 | -1.711563e-01 | -1.335328e-01 | -1.165508e-01 | -1.208487e-01 |     |  |
| -1.466198e-01 | -1.466227e-01 | -1.642190e-01 | -1.575226e-01 | -1.720767e-01 |     |  |
| -1.856092e-01 |               |               |               |               |     |  |
|               | 232           | 233           | 234           | 235           | 236 |  |
| 237           | 238           | 239           | 240           | 241           | 242 |  |
| -1.855702e-01 | -1.739880e-01 | -1.832985e-01 | -1.917563e-01 | -1.801434e-01 |     |  |
| -1.652353e-01 | -1.630405e-01 | -1.416341e-01 | -1.432769e-01 | -1.366978e-01 |     |  |
| -1.144764e-01 |               |               |               |               |     |  |
|               | 243           | 244           | 245           | 246           | 247 |  |
| 248           | 249           | 250           | 251           | 252           | 253 |  |
| -1.126911e-01 | -1.084816e-01 | -8.169143e-02 | -6.688594e-02 | -4.957989e-02 |     |  |
| -3.192743e-02 | -2.432390e-02 | -2.596985e-02 | -2.201664e-02 | 2.879271e-03  |     |  |

Supplementary Text 9

|               |               |               |               |               |     |  |
|---------------|---------------|---------------|---------------|---------------|-----|--|
| -9.557249e-03 |               |               |               |               |     |  |
| 254           | 255           | 256           | 257           | 258           |     |  |
| 259           | 260           | 261           | 262           | 263           | 264 |  |
| -3.435733e-02 | -8.024868e-02 | -9.234821e-02 | -1.152050e-01 | -9.056808e-02 |     |  |
| -8.413549e-02 | -1.305415e-01 | -1.429290e-01 | -1.144359e-01 | -1.249721e-01 |     |  |
| -1.584724e-01 |               |               |               |               |     |  |
| 265           | 266           | 267           | 268           | 269           |     |  |
| 270           | 271           | 272           | 273           | 274           | 275 |  |
| -1.510718e-01 | -1.365081e-01 | -1.556118e-01 | -1.648958e-01 | -1.368453e-01 |     |  |
| -1.327603e-01 | -1.360403e-01 | -1.553859e-01 | -1.602295e-01 | -1.648586e-01 |     |  |
| -1.721366e-01 |               |               |               |               |     |  |
| 276           | 277           | 278           | 279           | 280           |     |  |
| 281           | 282           | 283           | 284           | 285           | 286 |  |
| -1.485194e-01 | -1.326290e-01 | -1.528470e-01 | -1.445643e-01 | -1.506294e-01 |     |  |
| -1.497556e-01 | -1.479149e-01 | -1.595885e-01 | -1.526529e-01 | -1.389296e-01 |     |  |
| -1.317245e-01 |               |               |               |               |     |  |
| 287           | 288           | 289           | 290           | 291           |     |  |
| 292           | 293           | 294           | 295           | 296           | 297 |  |
| -1.111576e-01 | -9.636392e-02 | -8.843512e-02 | -7.118781e-02 | -4.150490e-02 |     |  |
| -3.476423e-02 | -3.752496e-02 | -4.550283e-03 | 1.236398e-02  | 3.999855e-03  |     |  |
| 1.376050e-03  |               |               |               |               |     |  |
| 298           | 299           | 300           | 301           | 302           |     |  |
| 303           | 304           | 305           | 306           | 307           | 308 |  |
| -1.428585e-02 | -3.071456e-02 | -5.355818e-02 | -4.294162e-02 | -2.799299e-02 |     |  |
| 5.272733e-03  | 4.416801e-02  | 8.072983e-02  | 6.488373e-02  | 9.050918e-02  |     |  |
| 1.042629e-01  |               |               |               |               |     |  |
| 309           | 310           | 311           | 312           | 313           |     |  |
| 314           | 315           | 316           | 317           | 318           | 319 |  |
| 1.006078e-01  | 7.307807e-02  | 6.475792e-02  | 3.776563e-02  | 5.236331e-02  |     |  |
| 9.118622e-02  | 9.029951e-02  | 1.078559e-01  | 1.029281e-01  | 1.339769e-01  |     |  |
| 9.100242e-02  |               |               |               |               |     |  |
| 320           | 321           | 322           | 323           | 324           |     |  |
| 325           | 326           | 327           | 328           | 329           | 330 |  |
| 7.007594e-02  | 1.102044e-01  | 1.247020e-01  | 6.041397e-02  | 4.487274e-02  |     |  |
| 8.253526e-02  | 5.714534e-02  | -1.571598e-03 | 6.371767e-03  | 2.393036e-02  |     |  |
| -2.120148e-02 |               |               |               |               |     |  |
| 331           | 332           | 333           | 334           | 335           |     |  |
| 336           | 337           | 338           | 339           | 340           | 341 |  |
| -6.176480e-02 | -5.116887e-02 | -4.252185e-02 | -7.739585e-02 | -9.207117e-02 |     |  |
| -1.117379e-01 | -1.033549e-01 | -1.237113e-01 | -1.118408e-01 | -9.731261e-02 |     |  |
| -7.987444e-02 |               |               |               |               |     |  |
| 342           | 343           | 344           | 345           | 346           |     |  |
| 347           | 348           | 349           | 350           | 351           | 352 |  |
| -8.017759e-02 | -1.013539e-01 | -1.030351e-01 | -9.838079e-02 | -7.497545e-02 |     |  |
| -6.225718e-02 | -5.554111e-02 | -7.587227e-02 | -6.065857e-02 | -4.800505e-02 |     |  |
| -1.176949e-02 |               |               |               |               |     |  |
| 353           | 354           | 355           | 356           | 357           |     |  |
| 358           | 359           | 360           | 361           | 362           | 363 |  |
| -1.097790e-03 | 7.632390e-04  | 4.191126e-02  | 7.108981e-02  | 8.561756e-02  |     |  |
| 1.052607e-01  | 1.738111e-01  | 1.823601e-01  | 2.006466e-01  | 2.494216e-01  |     |  |
| 3.300870e-01  |               |               |               |               |     |  |
| 364           | 365           | 366           | 367           | 368           |     |  |
| 369           | 370           | 371           | 372           | 373           | 374 |  |
| 2.916857e-01  | 2.677389e-01  | 3.453737e-01  | 3.427513e-01  | 2.744381e-01  |     |  |

Supplementary Text 9

|               |               |               |               |               |     |  |
|---------------|---------------|---------------|---------------|---------------|-----|--|
| 1.954961e-01  | 1.340725e-01  | 1.693425e-01  | 1.954809e-01  | 2.474051e-01  |     |  |
| 3.034286e-01  |               |               |               |               |     |  |
|               | 375           | 376           | 377           | 378           | 379 |  |
| 380           | 381           | 382           | 383           | 384           | 385 |  |
| 2.490873e-01  | 2.618289e-01  | 2.594507e-01  | 2.775005e-01  | 3.149495e-01  |     |  |
| 3.690323e-01  | 3.508615e-01  | 3.305711e-01  | 2.890912e-01  | 2.121107e-01  |     |  |
| 1.812971e-01  |               |               |               |               |     |  |
|               | 386           | 387           | 388           | 389           | 390 |  |
| 391           | 392           | 393           | 394           | 395           | 396 |  |
| 1.611780e-01  | 1.561376e-01  | 1.259513e-01  | 1.114391e-01  | 8.342234e-02  |     |  |
| 7.529608e-02  | 8.462434e-02  | 7.892285e-02  | 6.763970e-02  | 6.230326e-02  |     |  |
| 4.059737e-02  |               |               |               |               |     |  |
|               | 397           | 398           | 399           | 400           | 401 |  |
| 402           | 403           | 404           | 405           | 406           | 407 |  |
| 5.345384e-02  | 6.152299e-02  | 6.864493e-02  | 6.755930e-02  | 7.784116e-02  |     |  |
| 5.930995e-02  | 5.795010e-02  | 6.795347e-02  | 7.102137e-02  | 7.831176e-02  |     |  |
| 7.456178e-02  |               |               |               |               |     |  |
|               | 408           | 409           | 410           | 411           | 412 |  |
| 413           | 414           | 415           | 416           | 417           | 418 |  |
| 9.011037e-02  | 1.060301e-01  | 1.304111e-01  | 2.165947e-01  | 2.296420e-01  |     |  |
| 1.899036e-01  | 2.051479e-01  | 1.877242e-01  | 1.583102e-01  | 1.722275e-01  |     |  |
| 1.518190e-01  |               |               |               |               |     |  |
|               | 419           | 420           | 421           | 422           | 423 |  |
| 424           | 425           | 426           | 427           | 428           | 429 |  |
| 1.111503e-01  | 8.382500e-02  | 1.000235e-01  | 1.372244e-01  | 1.461098e-01  |     |  |
| 1.592196e-01  | 1.418655e-01  | 1.556824e-01  | 1.386646e-01  | 1.271754e-01  |     |  |
| 1.020953e-01  |               |               |               |               |     |  |
|               | 430           | 431           | 432           | 433           | 434 |  |
| 435           | 436           | 437           | 438           | 439           | 440 |  |
| 1.129326e-01  | 1.120583e-01  | 1.072353e-01  | 1.467138e-01  | 1.608993e-01  |     |  |
| 1.383571e-01  | 1.517435e-01  | 1.028397e-01  | 8.563021e-02  | 7.120571e-02  |     |  |
| 1.282626e-01  |               |               |               |               |     |  |
|               | 441           | 442           | 443           | 444           | 445 |  |
| 446           | 447           | 448           | 449           | 450           | 451 |  |
| 1.427431e-01  | 9.630028e-02  | 9.989693e-02  | 1.657904e-01  | 1.845395e-01  |     |  |
| 1.420597e-01  | 1.743395e-01  | 2.733528e-01  | 2.281912e-01  | 1.750333e-01  |     |  |
| 2.095005e-01  |               |               |               |               |     |  |
|               | 452           | 453           | 454           | 455           | 456 |  |
| 457           | 458           | 459           | 460           | 461           | 462 |  |
| 3.444114e-01  | 4.189671e-01  | 2.707203e-01  | 2.528741e-01  | 3.454096e-01  |     |  |
| 2.913460e-01  | 3.065091e-01  | 4.472971e-01  | 6.006762e-01  | 5.357308e-01  |     |  |
| 3.785613e-01  |               |               |               |               |     |  |
|               | 463           | 464           | 465           | 466           | 467 |  |
| 468           | 469           | 470           | 471           | 472           | 473 |  |
| 4.319756e-01  | 3.641575e-01  | 2.927618e-01  | 2.335054e-01  | 1.985870e-01  |     |  |
| 1.528776e-01  | 1.255755e-01  | 9.340579e-02  | 7.505288e-02  | 5.861449e-02  |     |  |
| 2.269492e-02  |               |               |               |               |     |  |
|               | 474           | 475           | 476           | 477           | 478 |  |
| 479           | 480           | 481           | 482           | 483           | 484 |  |
| 1.030761e-02  | -1.033160e-02 | -1.489069e-02 | -1.121157e-02 | -2.301405e-02 |     |  |
| -4.311174e-02 | -3.517544e-02 | -3.796919e-02 | -6.633628e-02 | -7.163065e-02 |     |  |
| -9.854430e-02 |               |               |               |               |     |  |
|               | 485           | 486           | 487           | 488           | 489 |  |
| 490           | 491           | 492           | 493           | 494           | 495 |  |

Supplementary Text 9

|               |               |               |               |               |     |     |
|---------------|---------------|---------------|---------------|---------------|-----|-----|
| -1.020200e-01 | -7.470737e-02 | -8.330658e-02 | -2.729880e-02 | -3.420754e-02 |     |     |
| -9.316875e-02 | -6.258422e-02 | -8.523198e-02 | -3.928792e-02 | -2.044682e-02 |     |     |
| -7.176108e-02 |               |               |               |               |     |     |
|               | 496           | 497           | 498           | 499           | 500 |     |
| 501           | 502           | 503           | 504           | 505           |     | 506 |
| -2.873215e-02 | -7.258866e-02 | -1.576461e-02 | -6.351118e-02 | -1.341373e-02 |     |     |
| 1.039700e-02  | 1.379080e-02  | 4.118106e-02  | 4.327562e-02  | 5.535198e-02  |     |     |
| 5.520484e-02  |               |               |               |               |     |     |
|               | 507           | 508           | 509           | 510           | 511 |     |
| 512           | 513           | 514           | 515           | 516           |     | 517 |
| 5.999531e-02  | 5.858096e-02  | 5.915056e-02  | 5.500490e-02  | 4.938637e-02  |     |     |
| 1.317576e-02  | -3.322280e-02 | -7.712489e-02 | -1.133782e-01 | -1.764602e-01 |     |     |
| -1.999948e-01 |               |               |               |               |     |     |
|               | 518           | 519           | 520           | 521           | 522 |     |
| 523           | 524           | 525           | 526           | 527           |     | 528 |
| -2.491698e-01 | -2.337244e-01 | -2.522749e-01 | -2.281895e-01 | -2.350864e-01 |     |     |
| -1.962885e-01 | -1.940362e-01 | -1.574462e-01 | -1.127796e-01 | -9.197486e-02 |     |     |
| -1.441374e-01 |               |               |               |               |     |     |
|               | 529           | 530           | 531           | 532           | 533 |     |
| 534           | 535           | 536           | 537           | 538           |     | 539 |
| -1.580788e-01 | -1.135036e-01 | -6.582795e-02 | -7.490661e-02 | -2.285550e-02 |     |     |
| -2.662720e-02 | 3.476743e-02  | 3.411462e-02  | 9.370645e-02  | 1.181256e-01  |     |     |
| 9.943541e-02  |               |               |               |               |     |     |
|               | 540           | 541           | 542           | 543           | 544 |     |
| 545           | 546           | 547           | 548           | 549           |     | 550 |
| 8.207795e-02  | 3.394199e-02  | -2.464683e-02 | -2.665013e-02 | -8.860866e-02 |     |     |
| -1.647257e-01 | -2.101026e-01 | -1.944208e-01 | -1.996602e-01 | -2.112620e-01 |     |     |
| -2.464155e-01 |               |               |               |               |     |     |
|               | 551           | 552           | 553           | 554           | 555 |     |
| 556           | 557           | 558           | 559           | 560           |     | 561 |
| -2.708843e-01 | -2.613004e-01 | -2.614069e-01 | -1.934760e-01 | -1.490610e-01 |     |     |
| -8.111284e-02 | -4.965397e-02 | 1.818505e-02  | 4.401125e-02  | 8.774206e-02  |     |     |
| 8.967682e-02  |               |               |               |               |     |     |
|               | 562           | 563           | 564           | 565           | 566 |     |
| 567           | 568           | 569           | 570           | 571           |     | 572 |
| 7.568937e-02  | 6.709869e-02  | 6.937443e-02  | 7.648835e-02  | 6.921764e-02  |     |     |
| 5.311304e-02  | 8.130731e-02  | 5.085948e-02  | 4.250460e-02  | 3.307234e-02  |     |     |
| -2.919437e-02 |               |               |               |               |     |     |
|               | 573           | 574           | 575           | 576           | 577 |     |
| 578           | 579           | 580           | 581           | 582           |     | 583 |
| -3.267871e-02 | -9.102012e-02 | -8.406498e-02 | -1.158298e-01 | -7.101522e-02 |     |     |
| -6.722696e-02 | -1.228717e-01 | -1.523422e-01 | -1.928903e-01 | -1.782528e-01 |     |     |
| -1.827061e-01 |               |               |               |               |     |     |
|               | 584           | 585           |               |               |     |     |
| -1.939270e-01 | -1.778137e-01 |               |               |               |     |     |
